# Supplementary material
Source: publisher figshare collection journal article supplement (https://frontiersin.figshare.com/ndownloader/files/13643444)

site : 840\_25\_10

absolute deviation = 4.51 | deviation change = 0.47 | maximum state number = 1

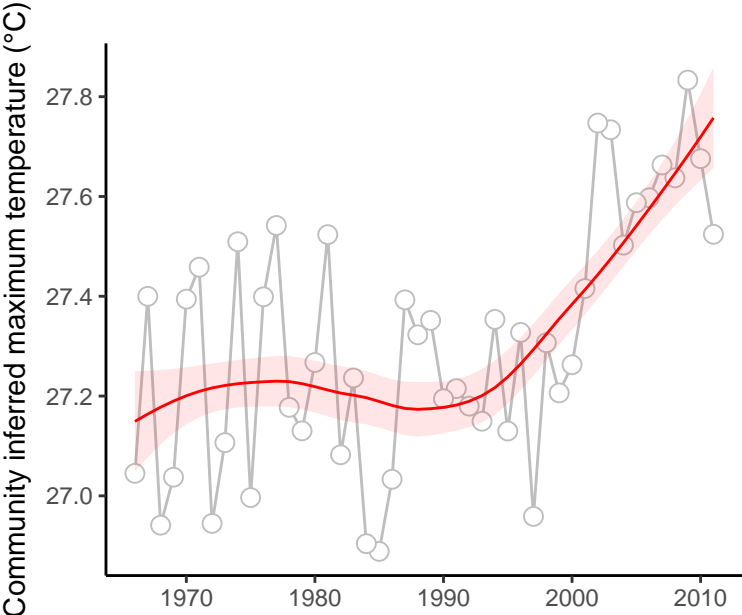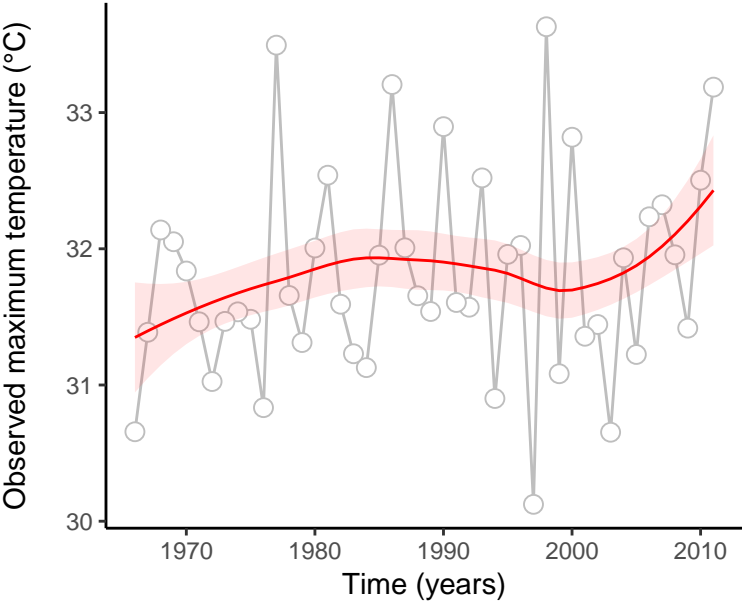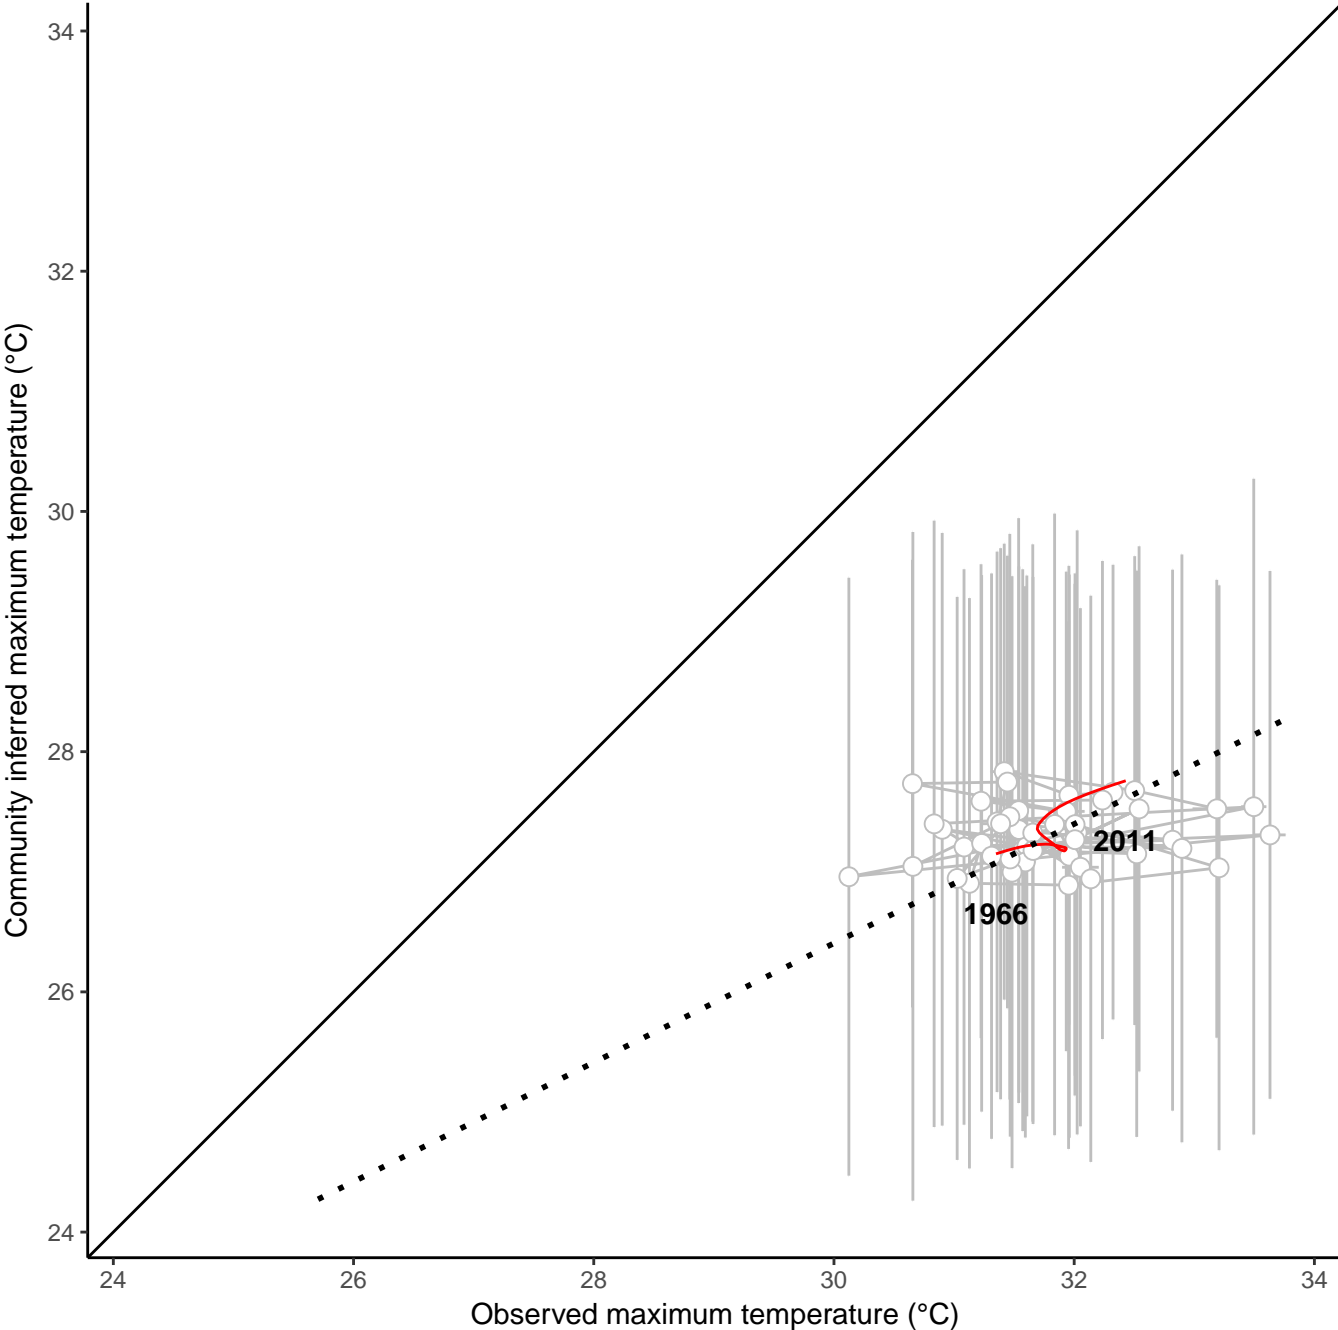

site : 840\_25\_24

absolute deviation = 5.89 | deviation change = 0.96 | maximum state number = 2

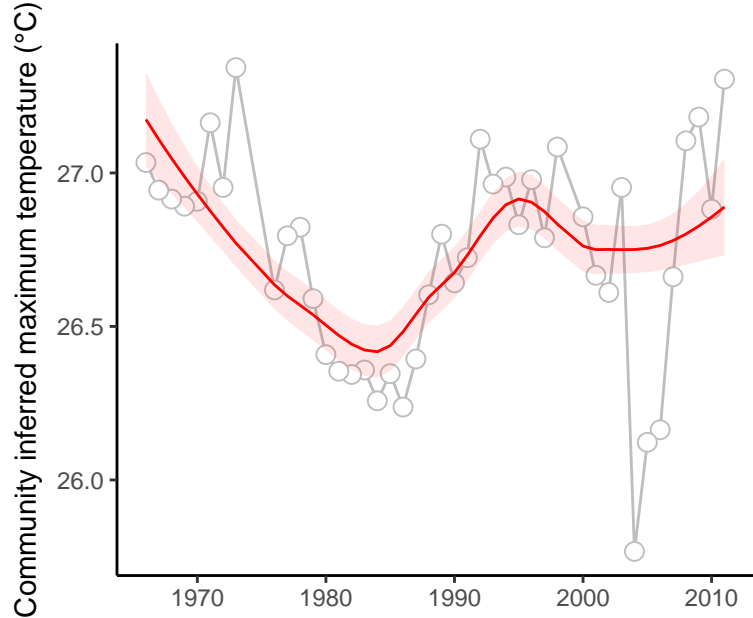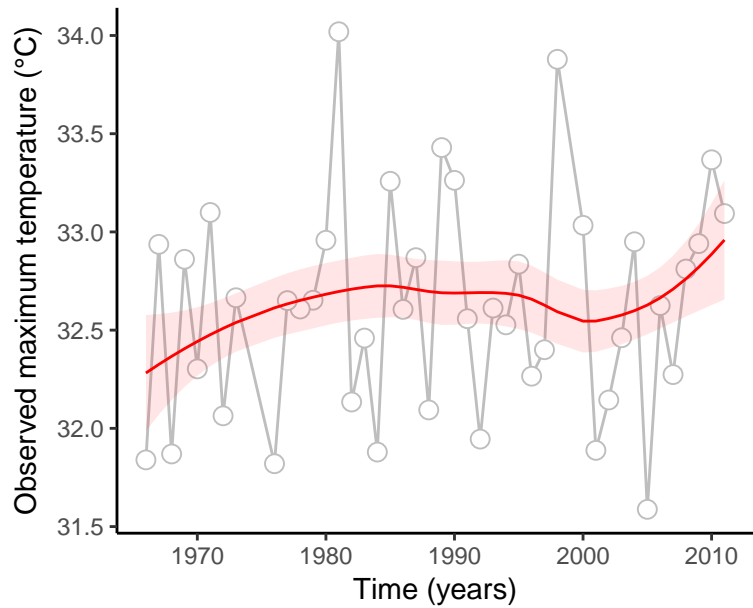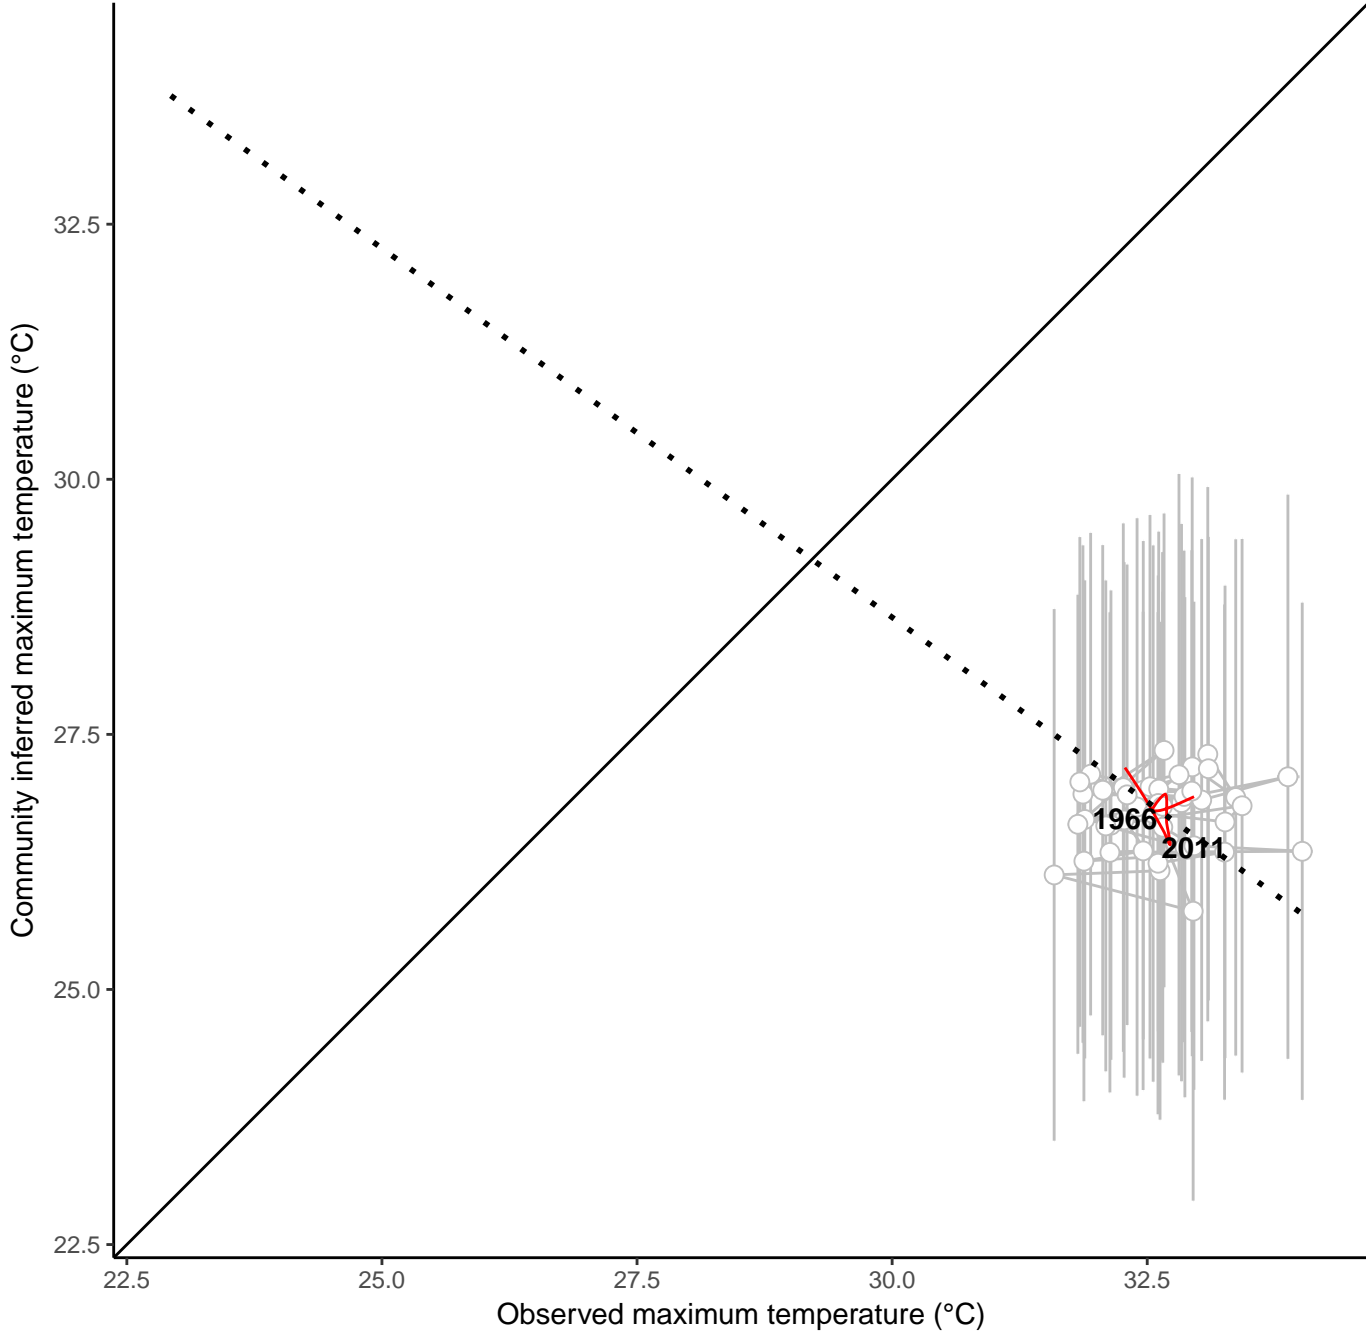

site : 840\_27\_9

absolute deviation = 4.48 | deviation change = 0.19 | maximum state number = 1

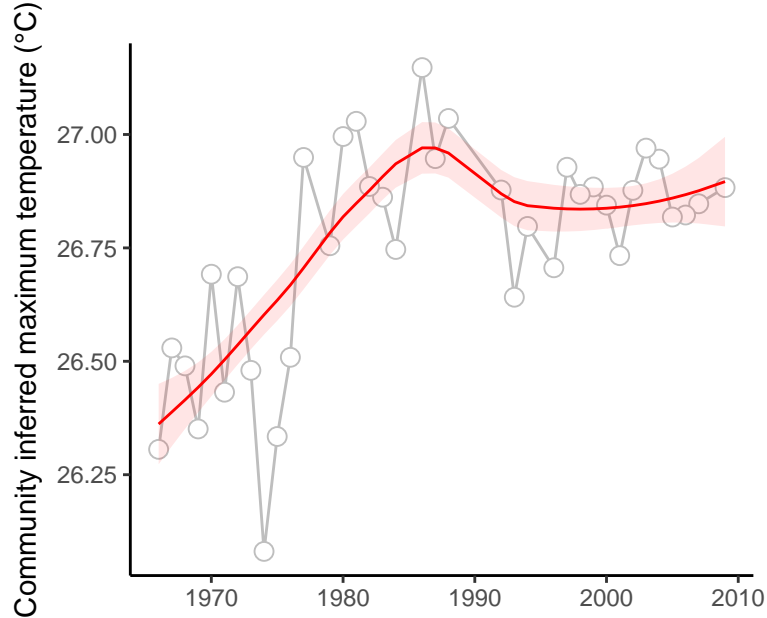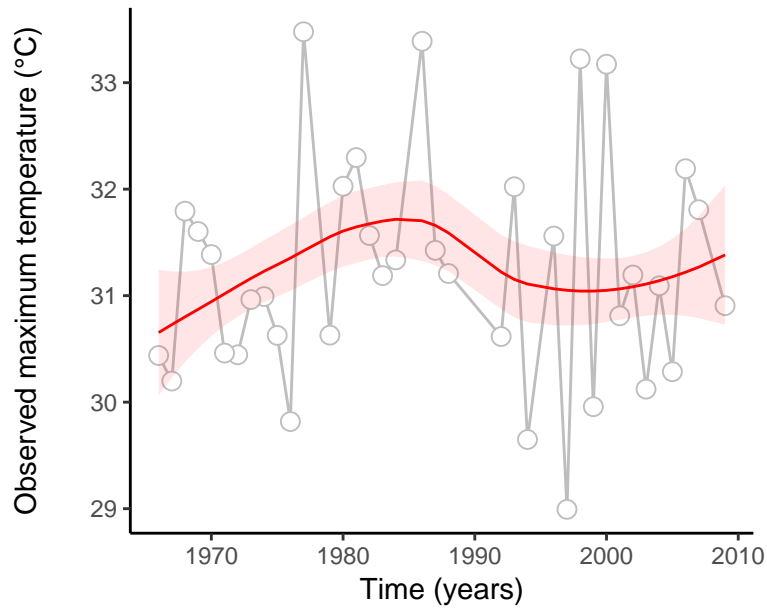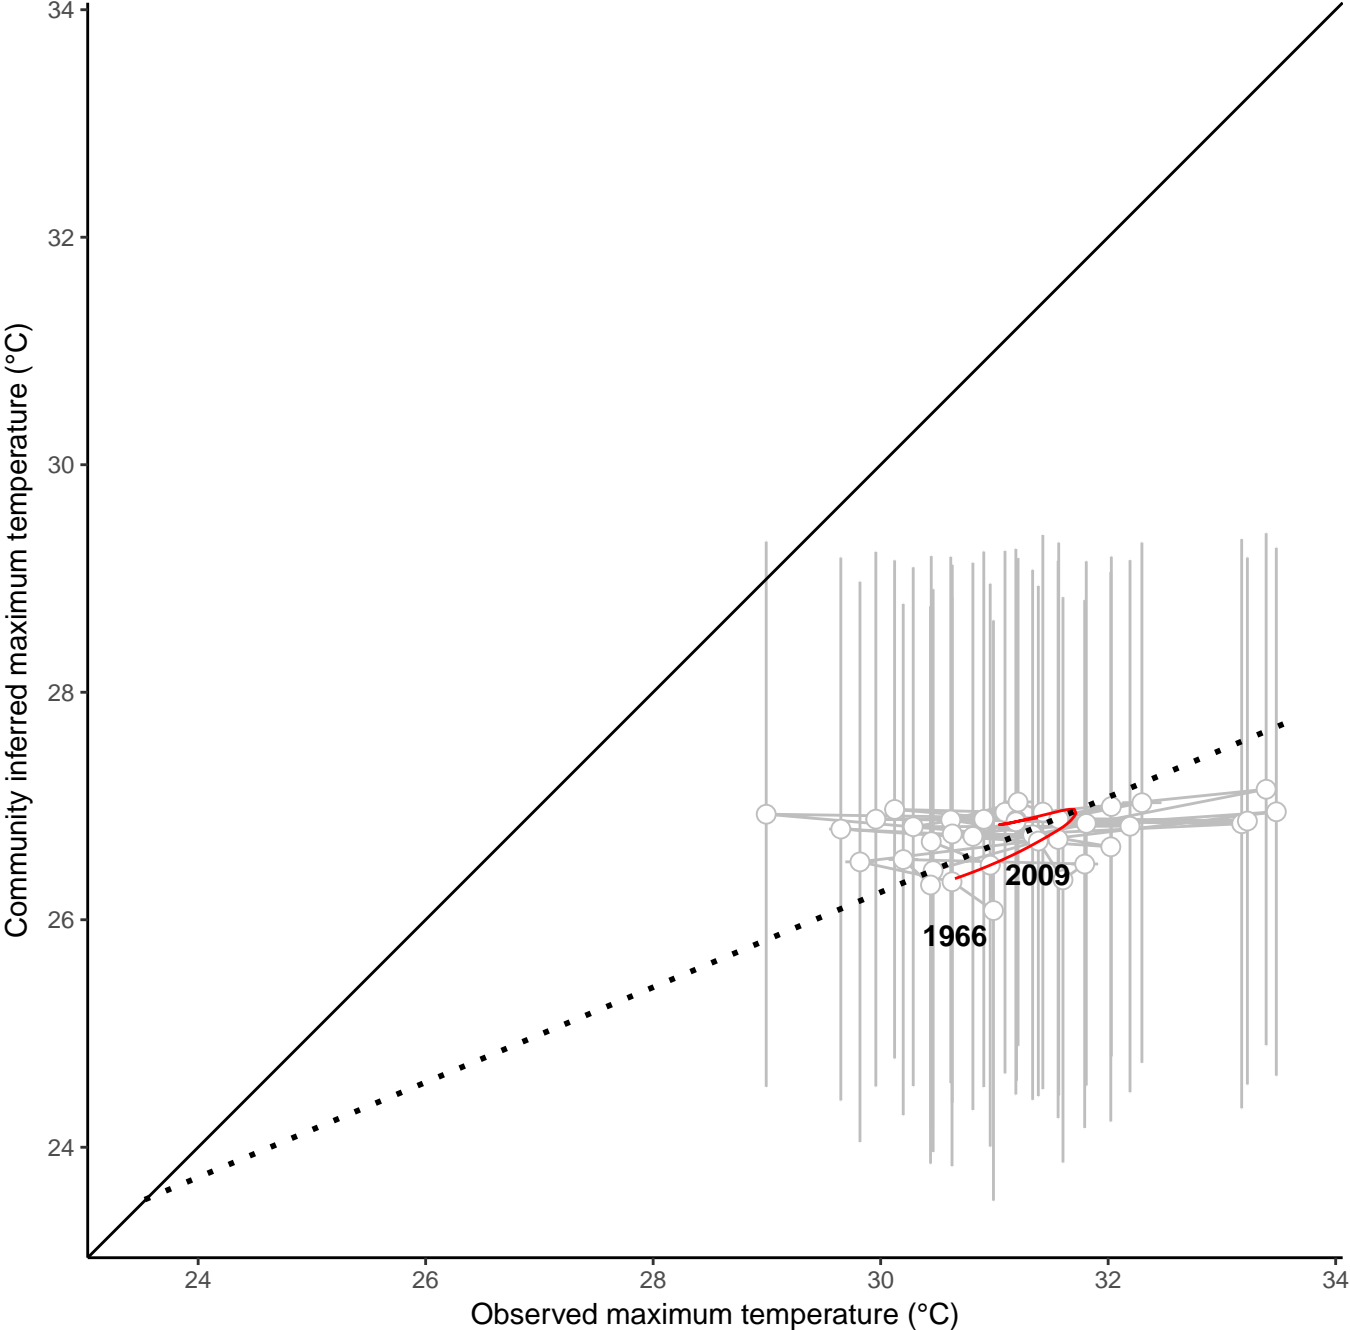

site : 840\_35\_9

absolute deviation = 2.34 | deviation change = 1.78 | maximum state number = 1

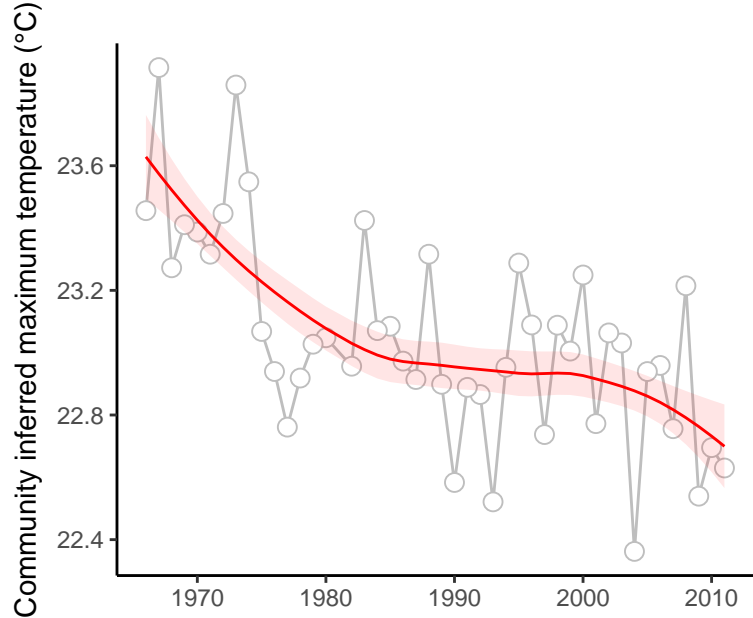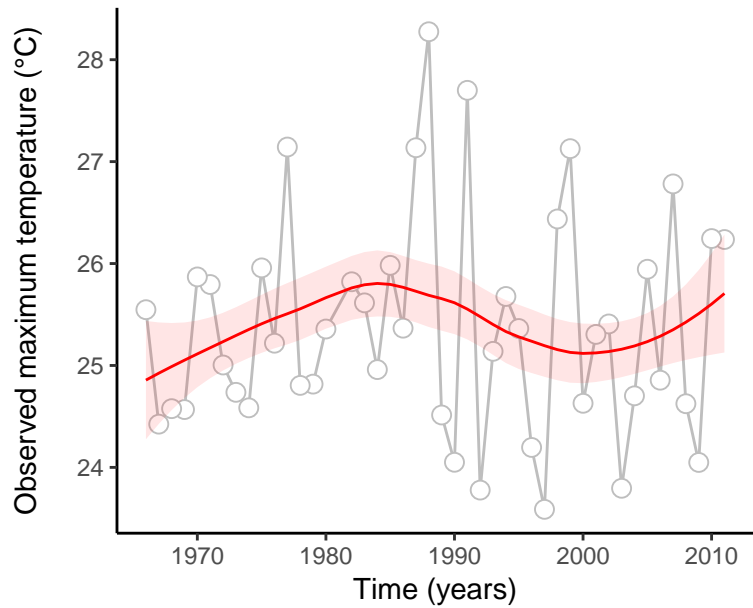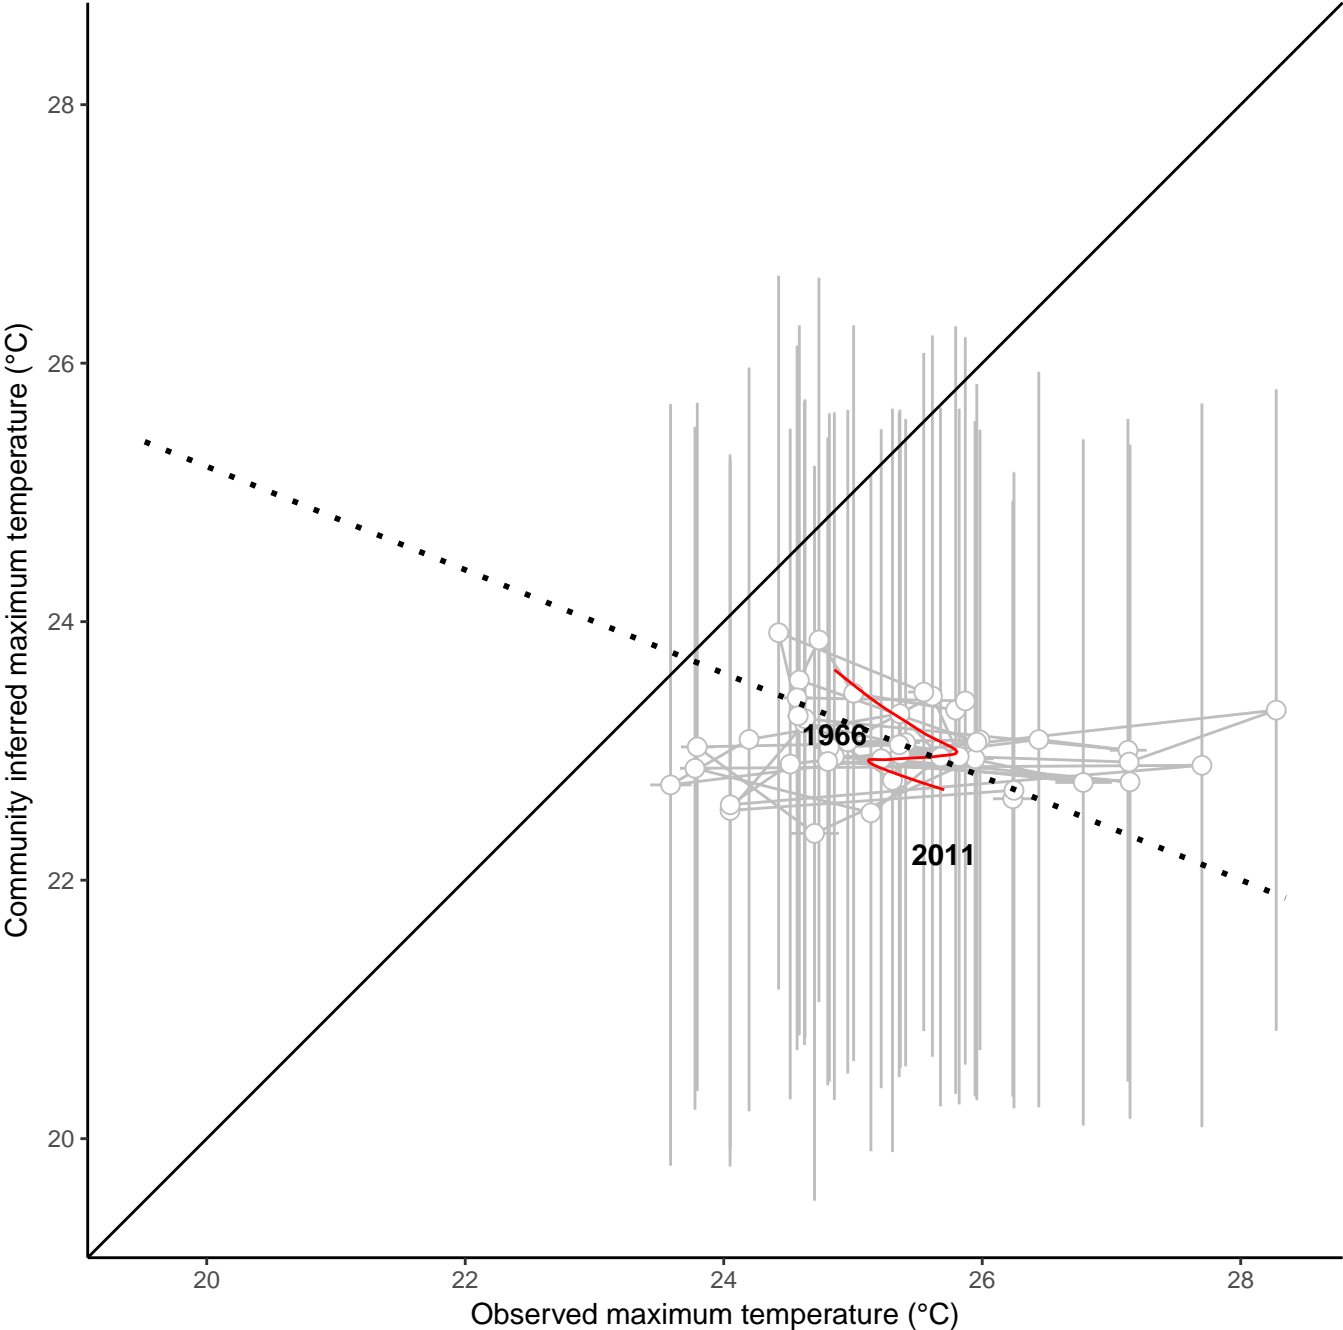

site : 840\_46\_42

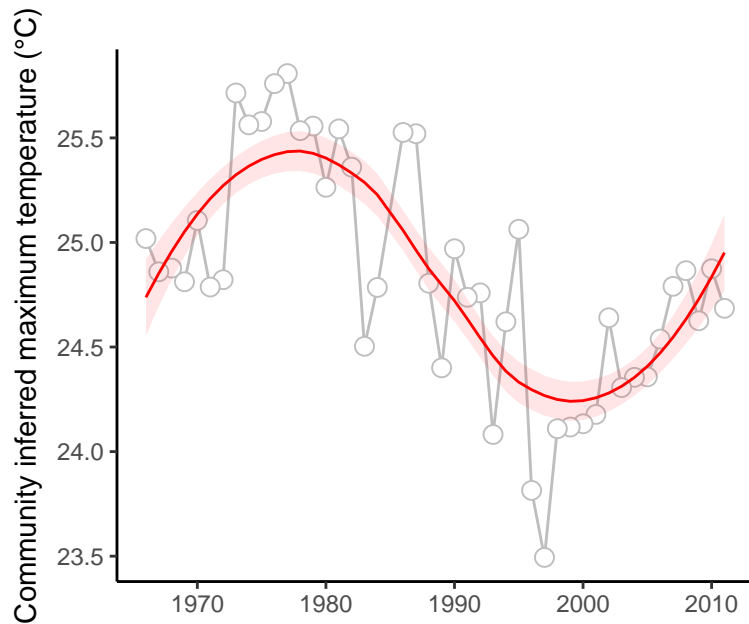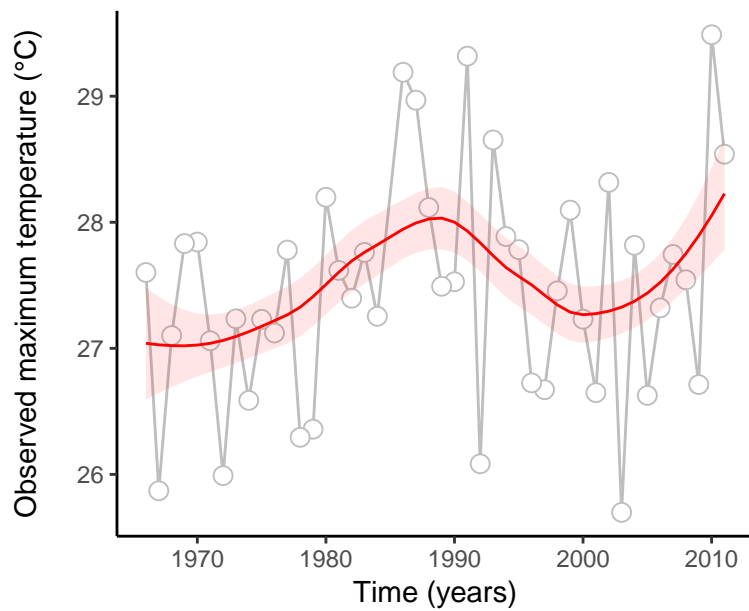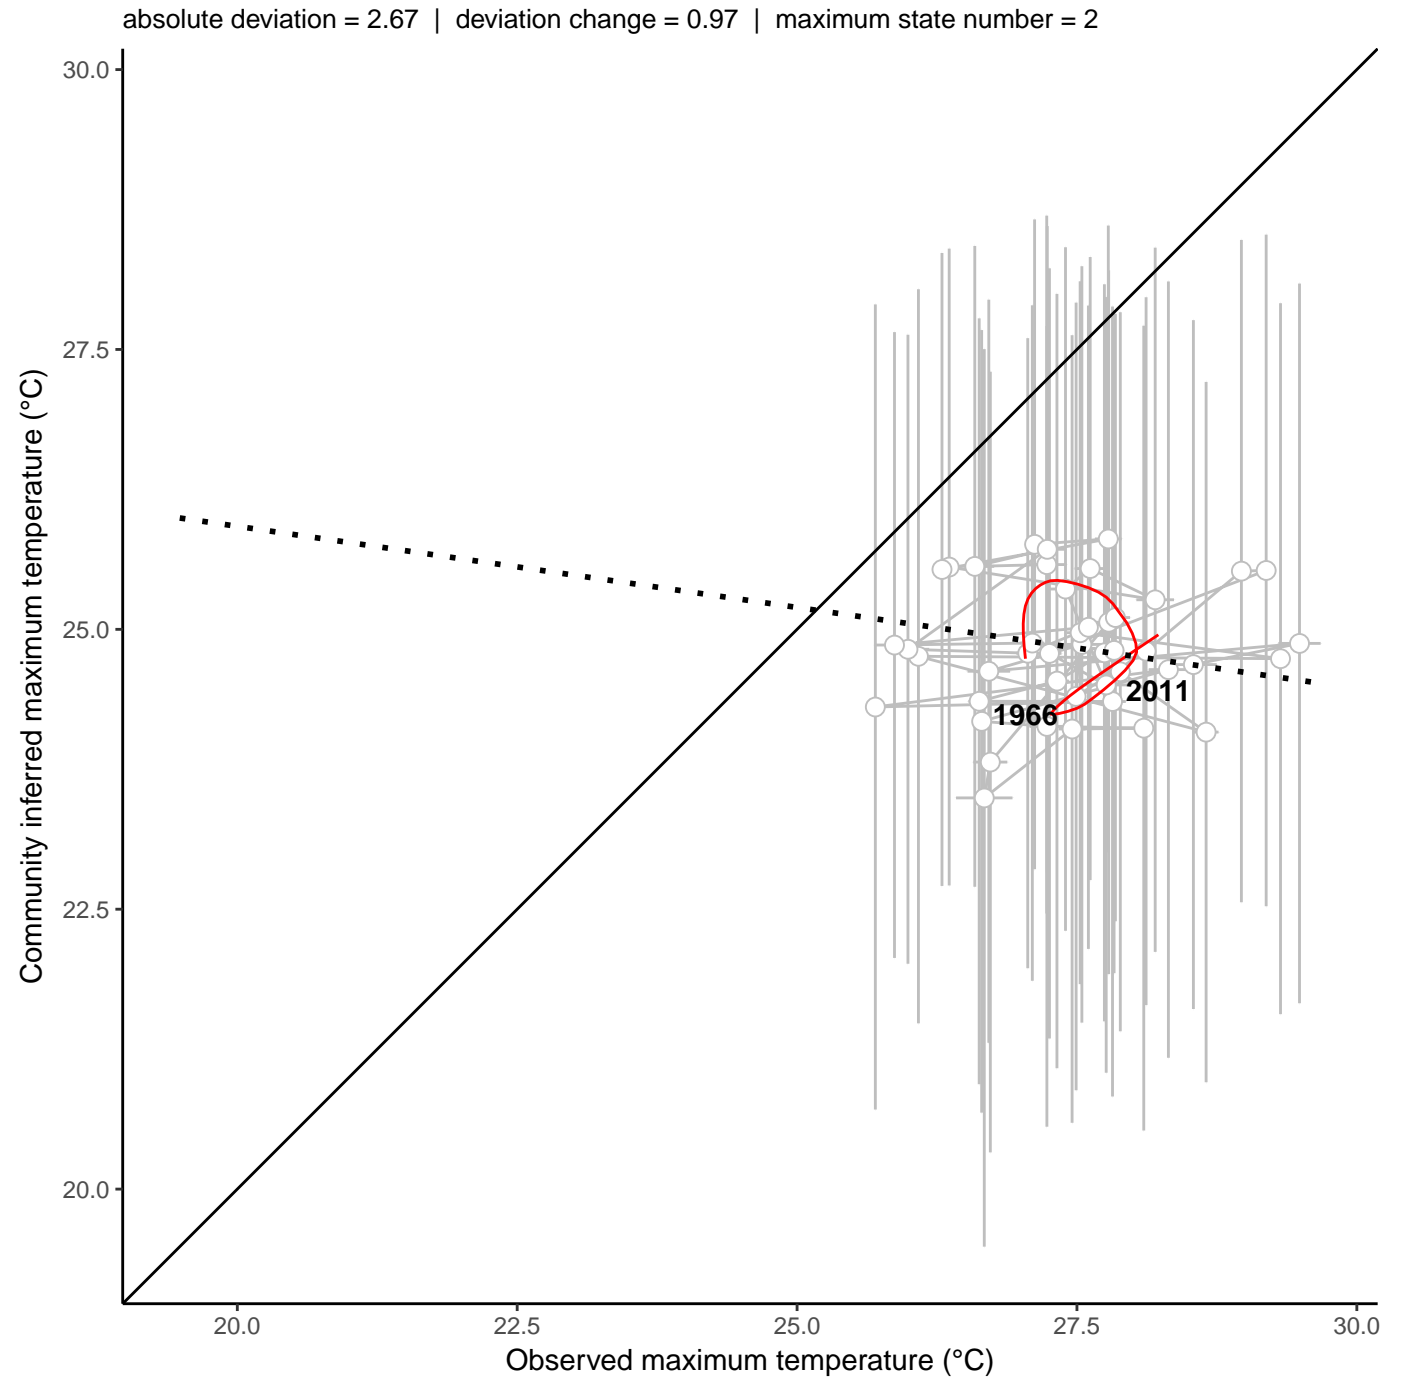

site : 840\_66\_73

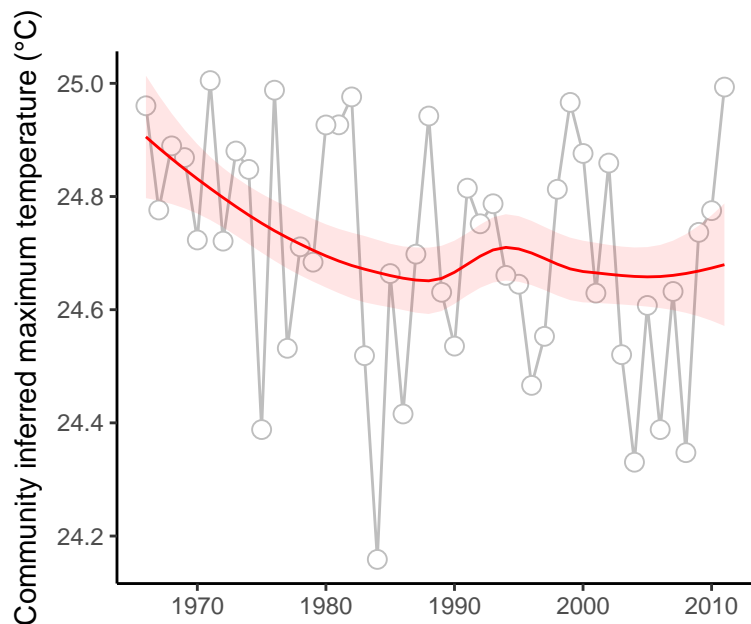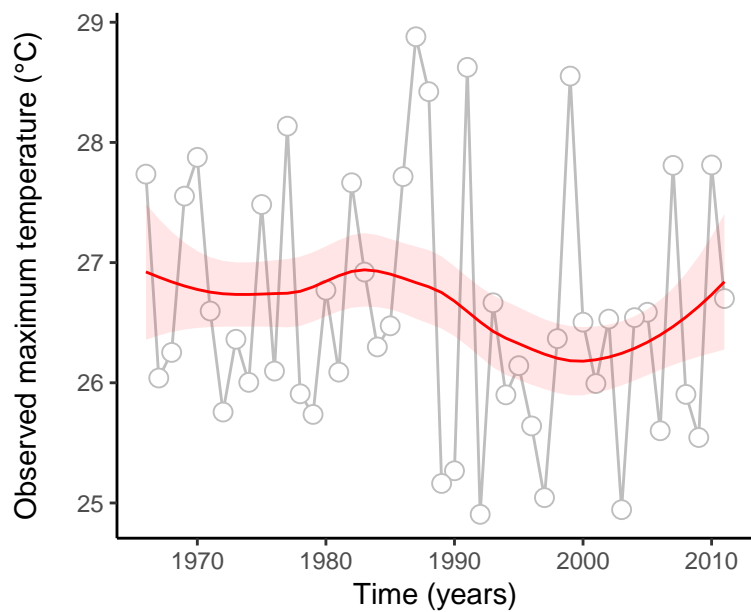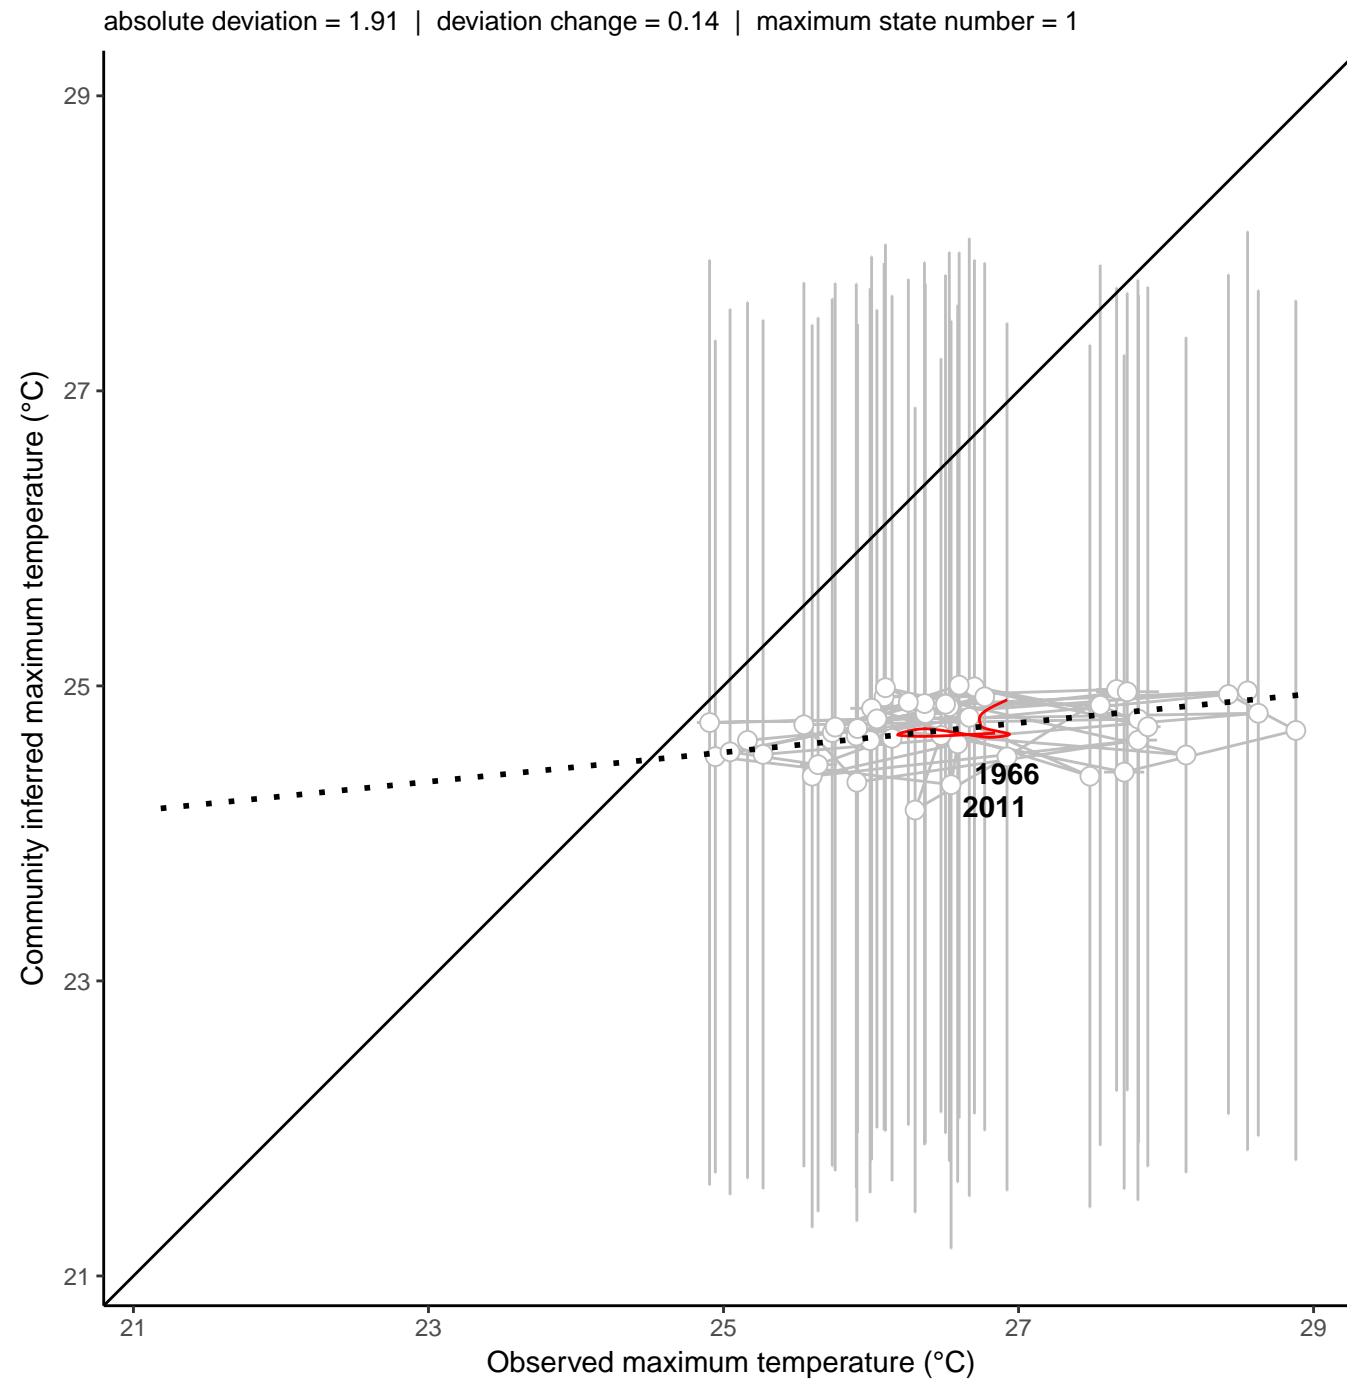

site : 840\_82\_8

absolute deviation = 3.36 | deviation change = 0.71 | maximum state number = 1

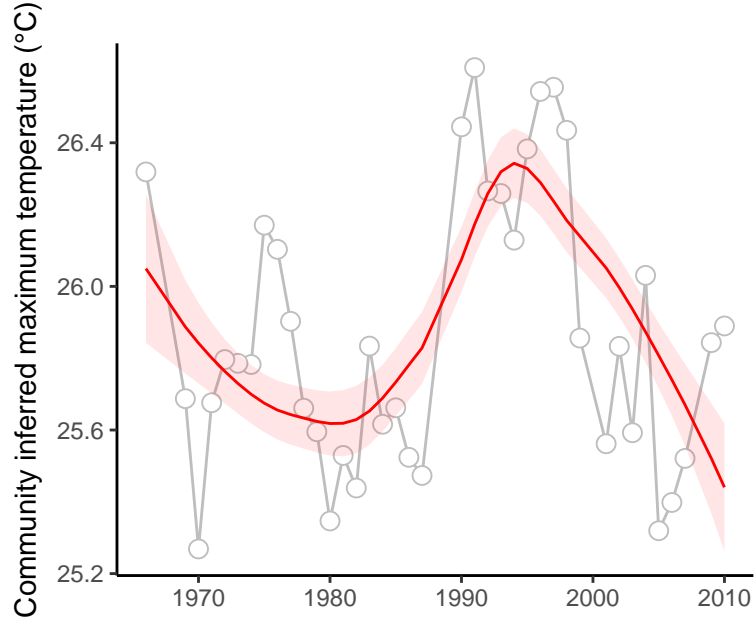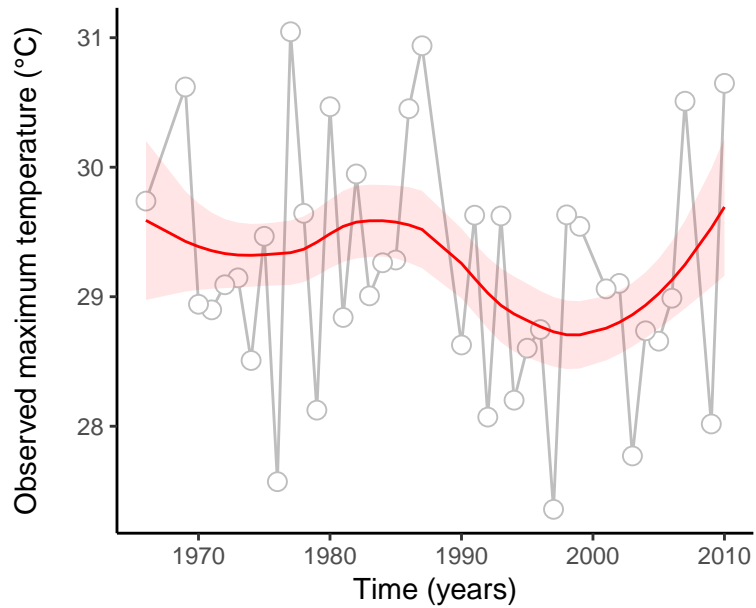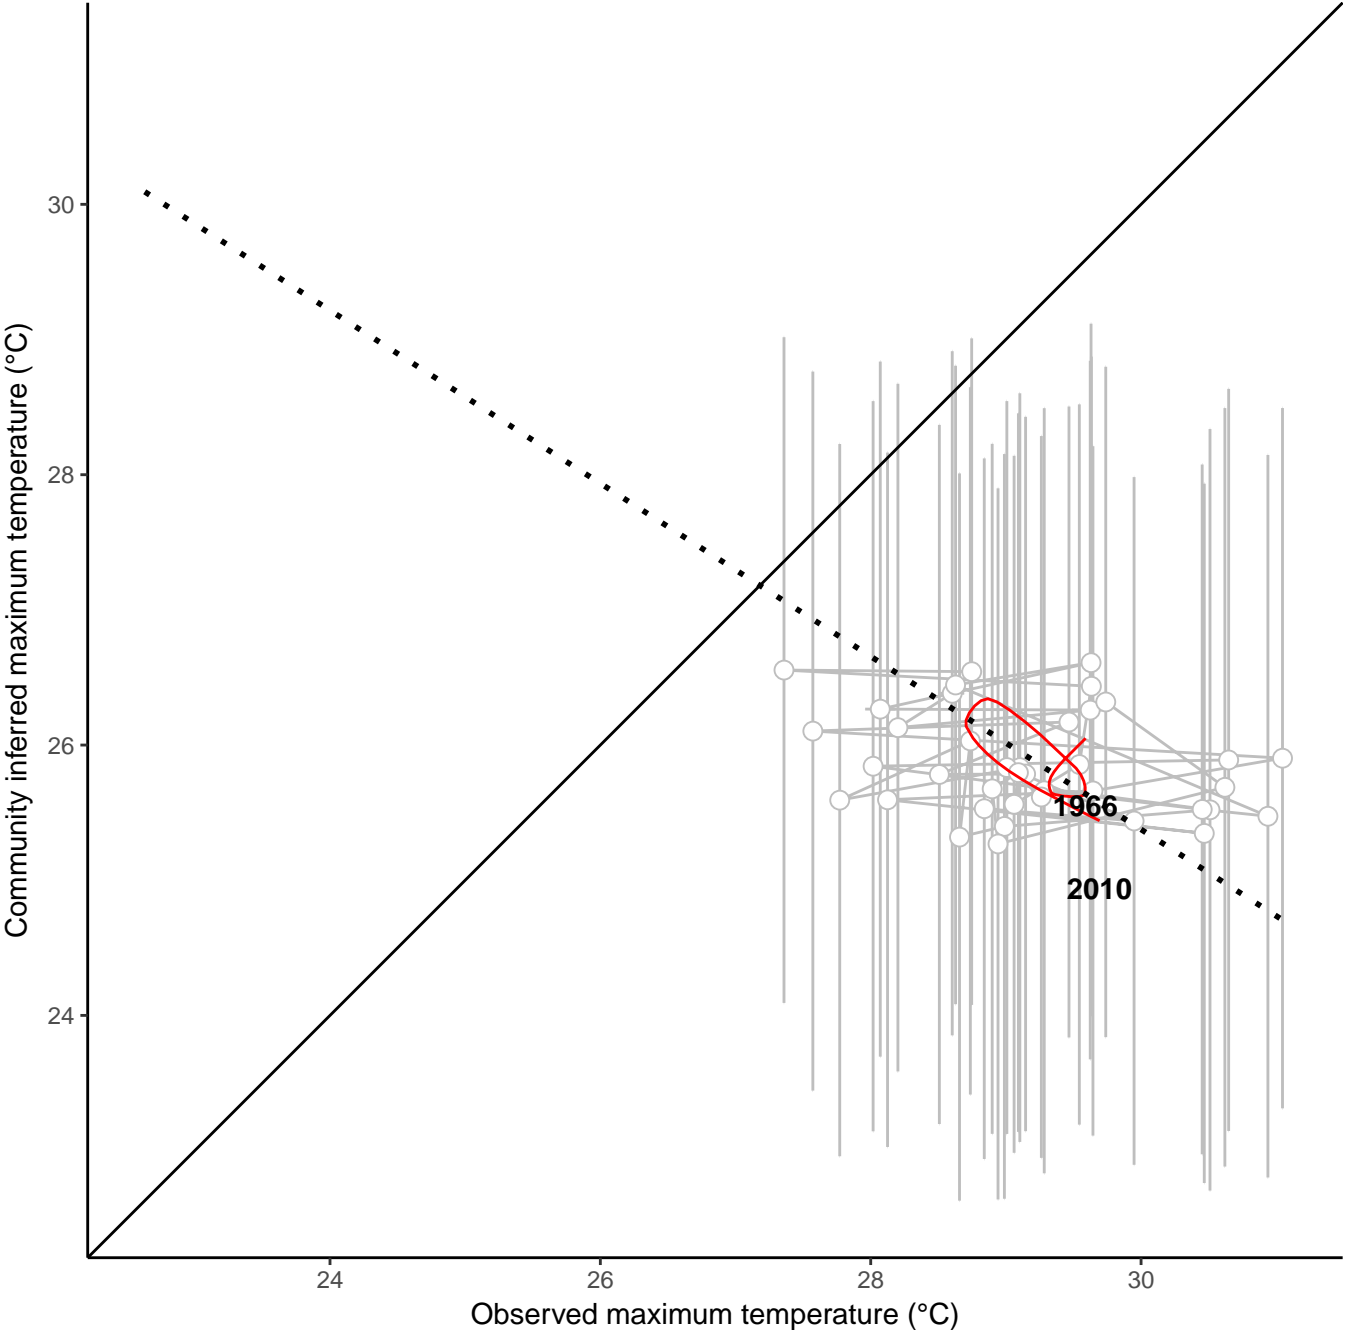

site : 840\_91\_35

absolute deviation = 1.04 | deviation change = 0.2 | maximum state number = 1

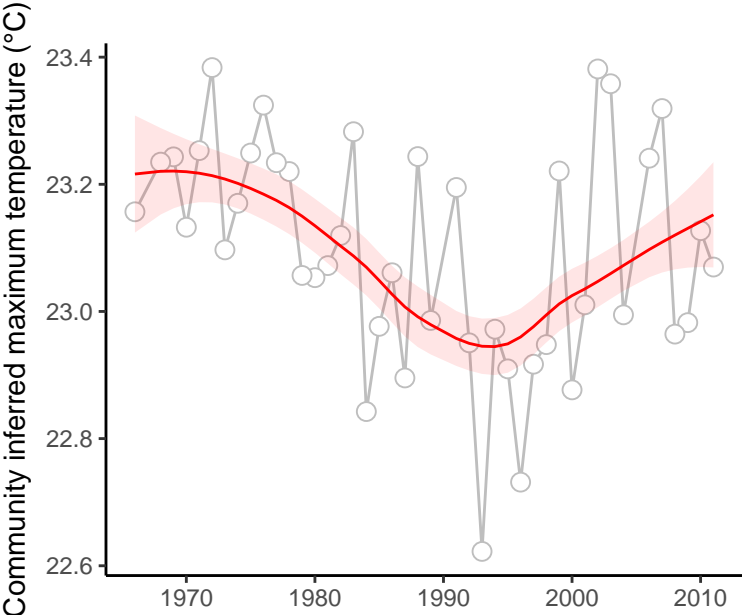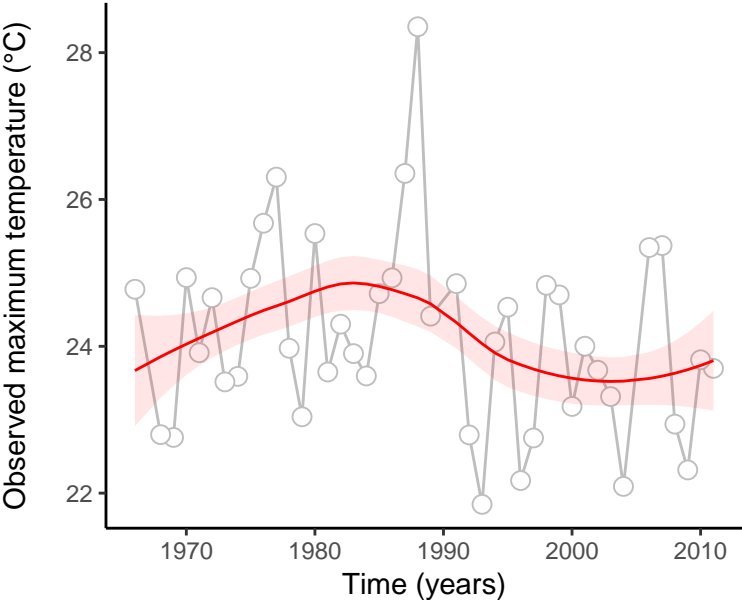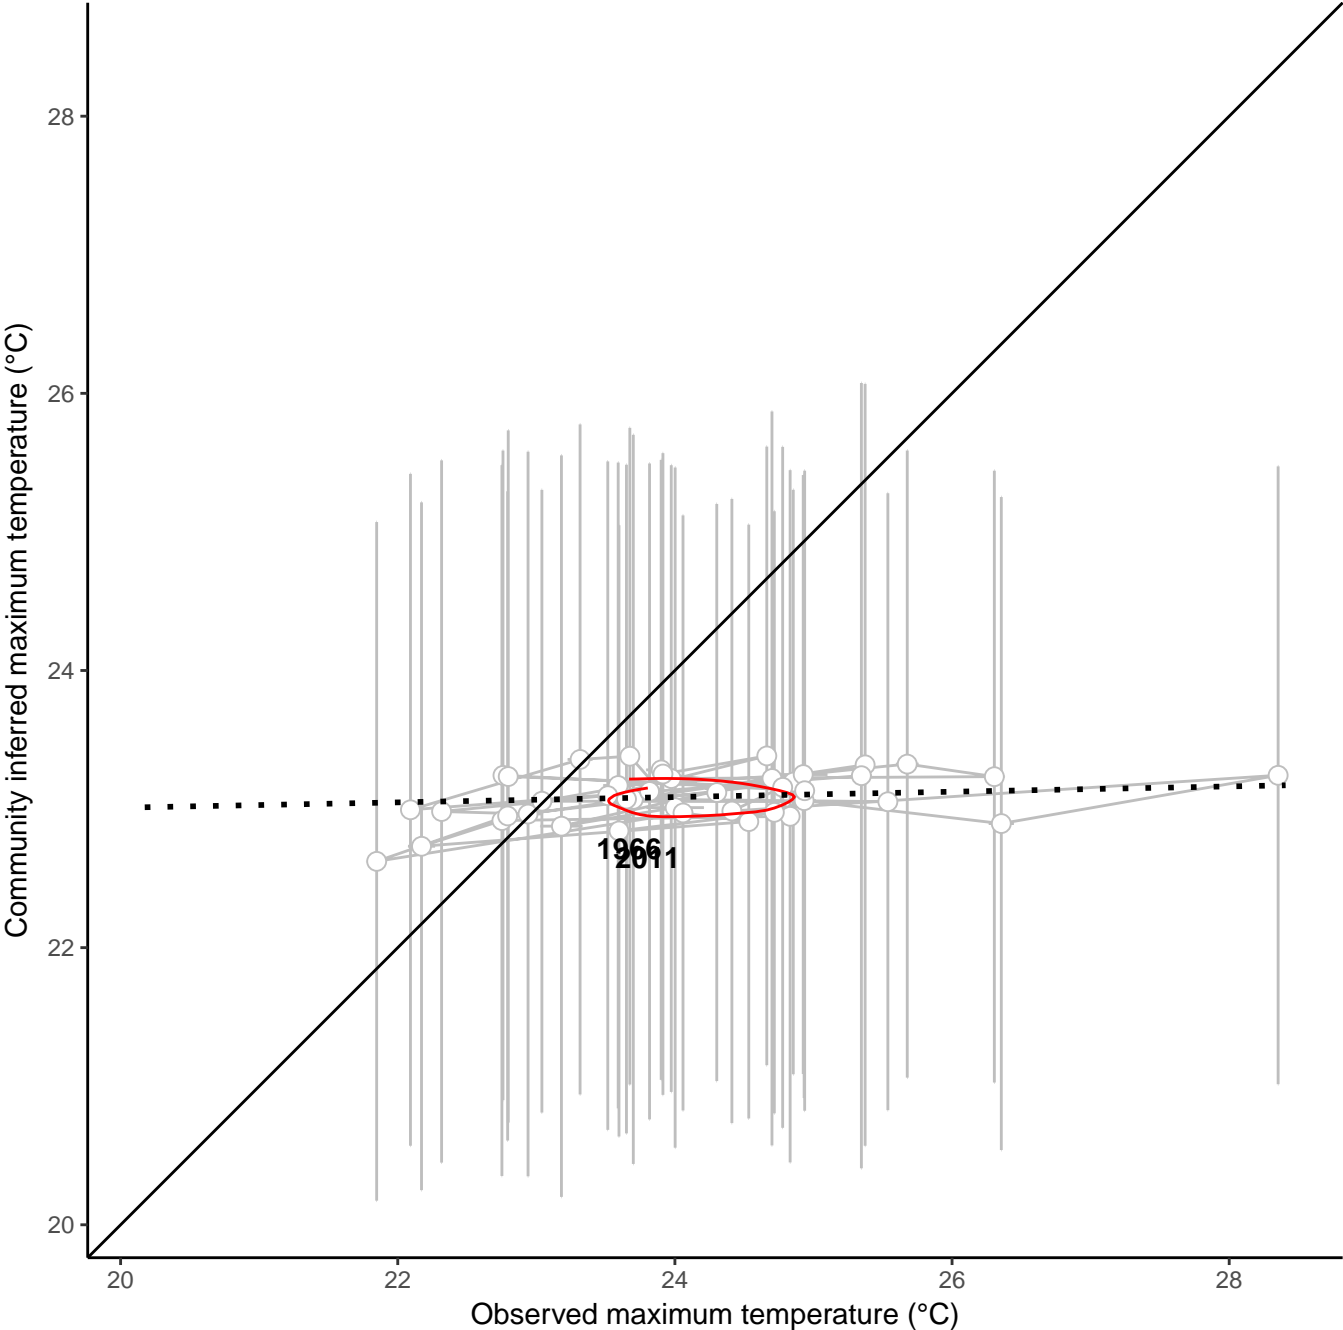



site : 840\_91\_42

absolute deviation = 0.67 | deviation change = -0.17 | maximum state number = 1

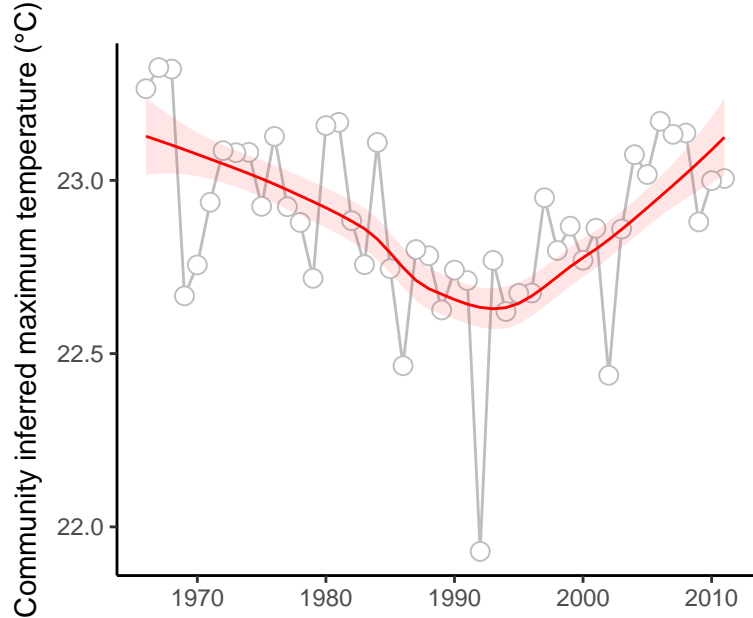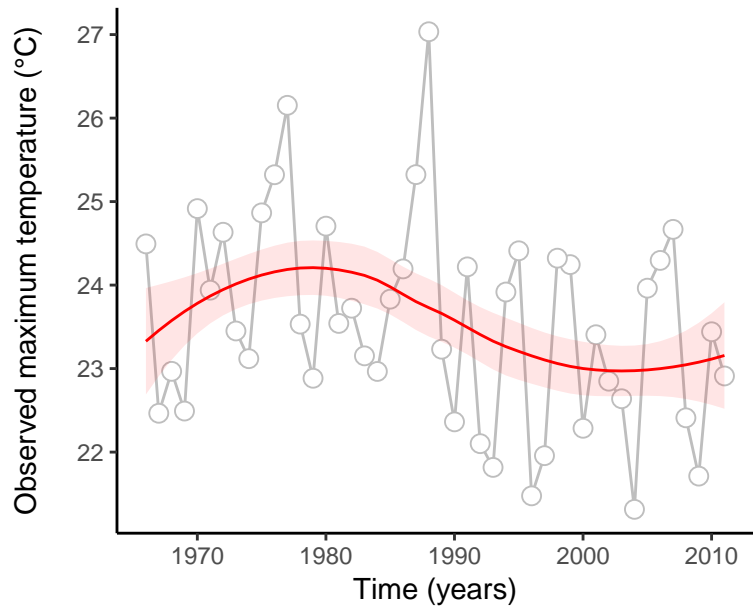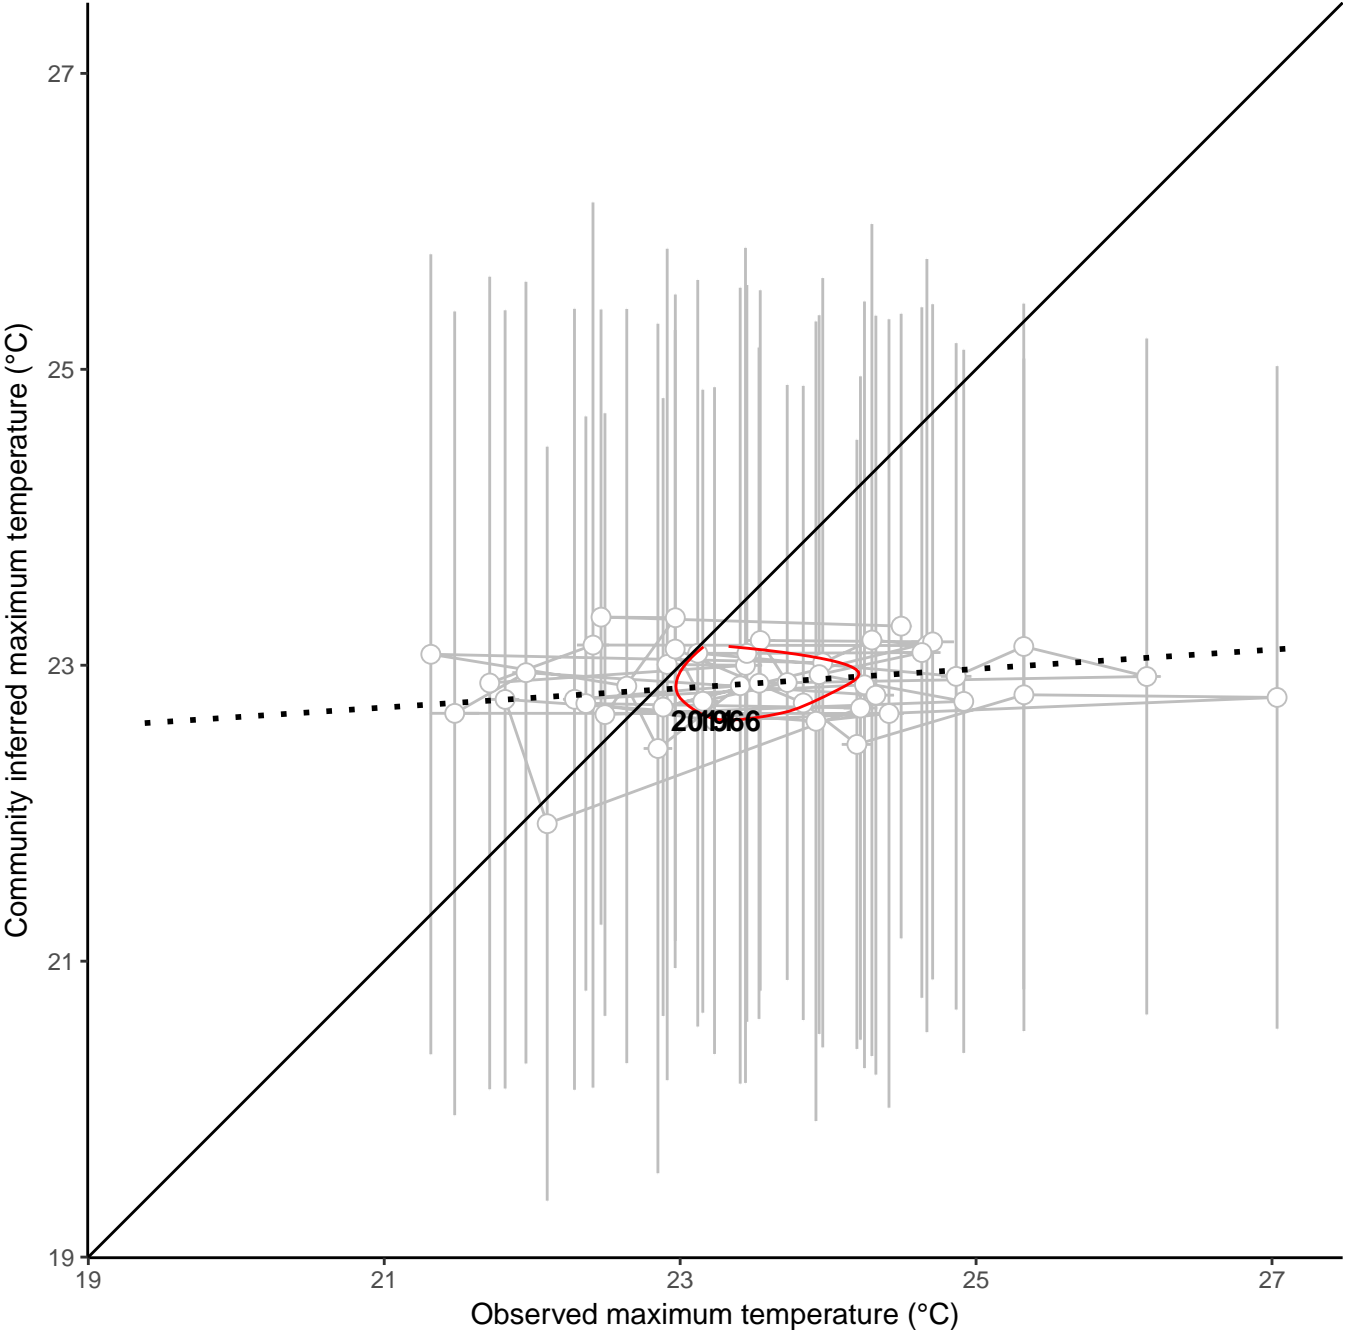

site : 840\_91\_43

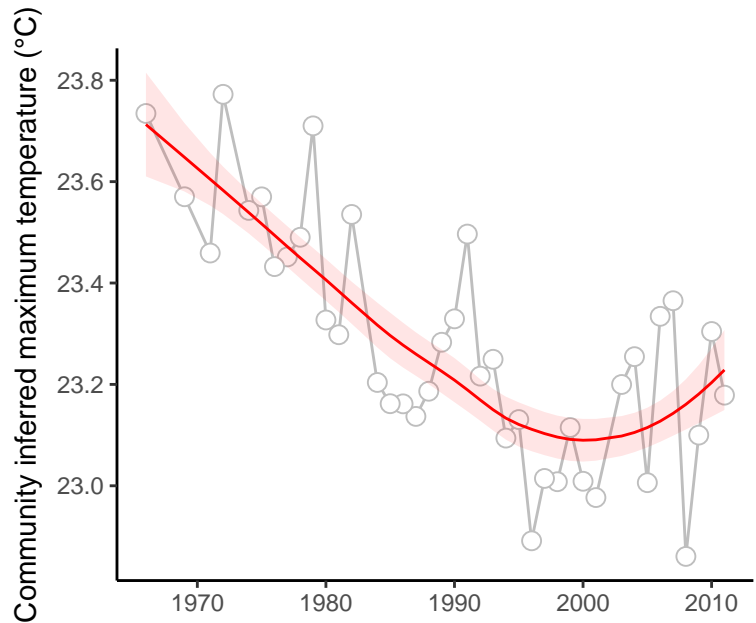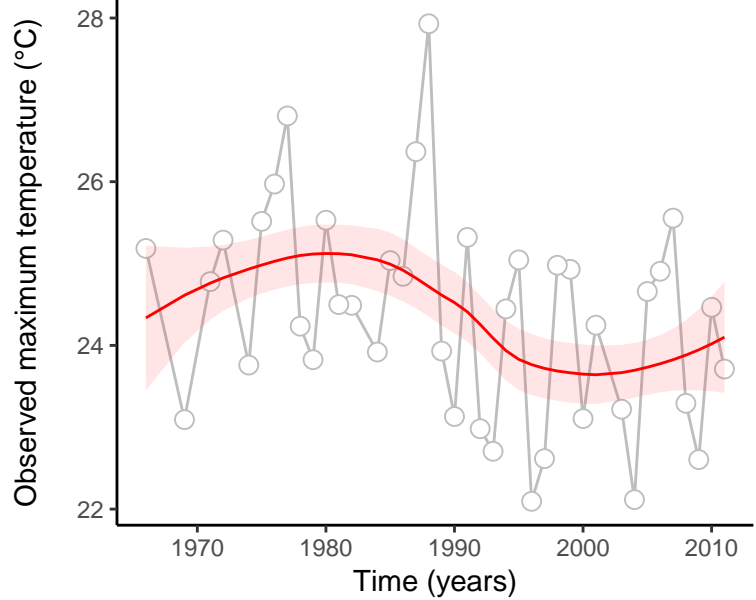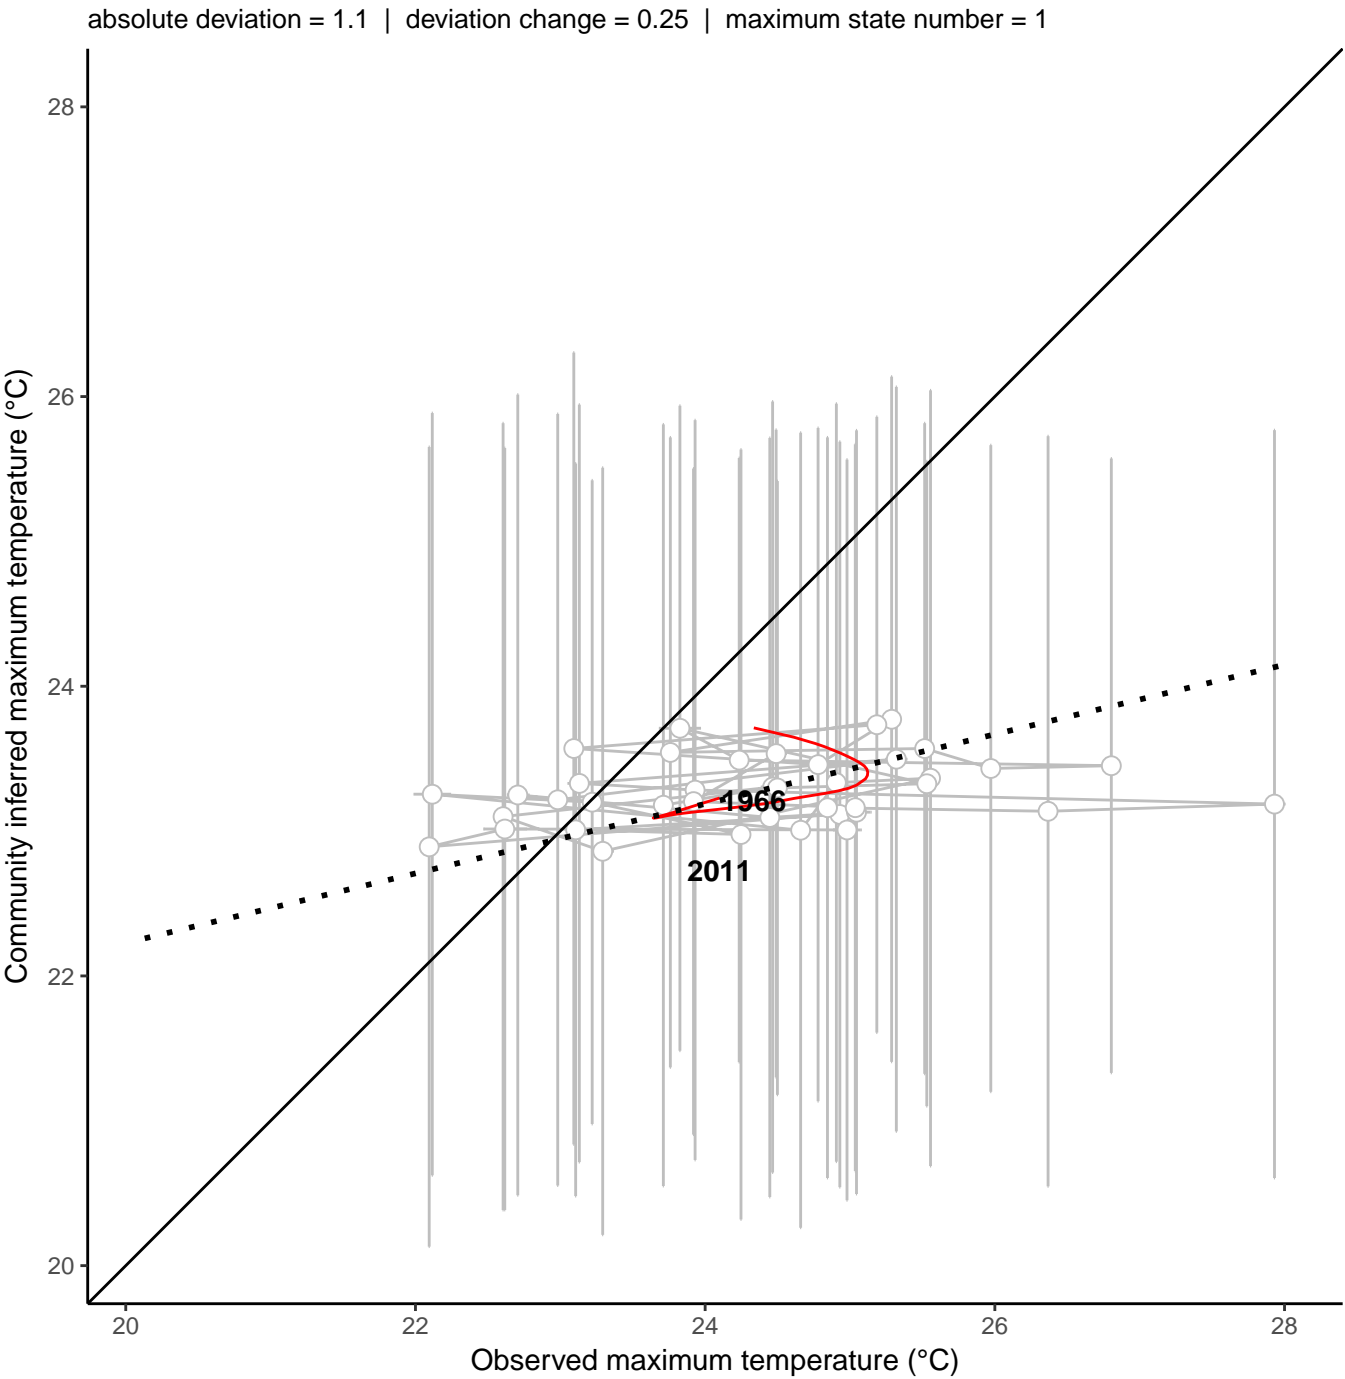

site : 840\_2\_6

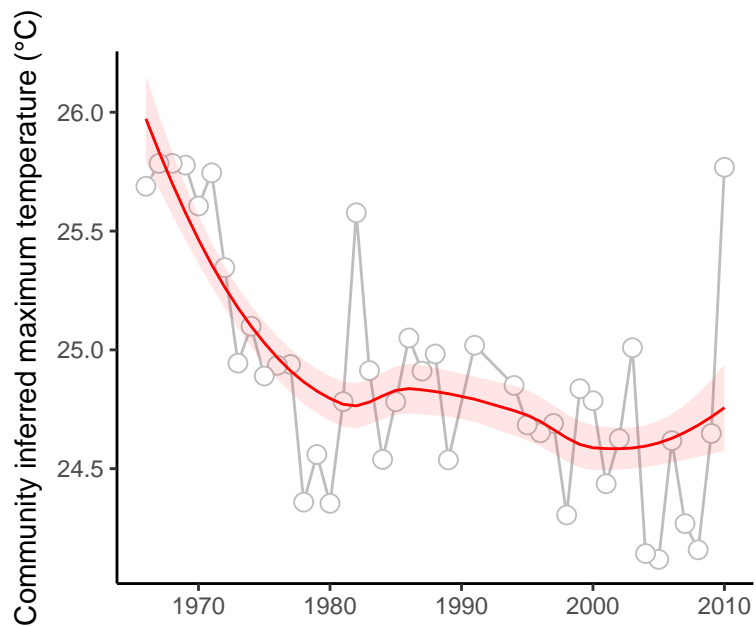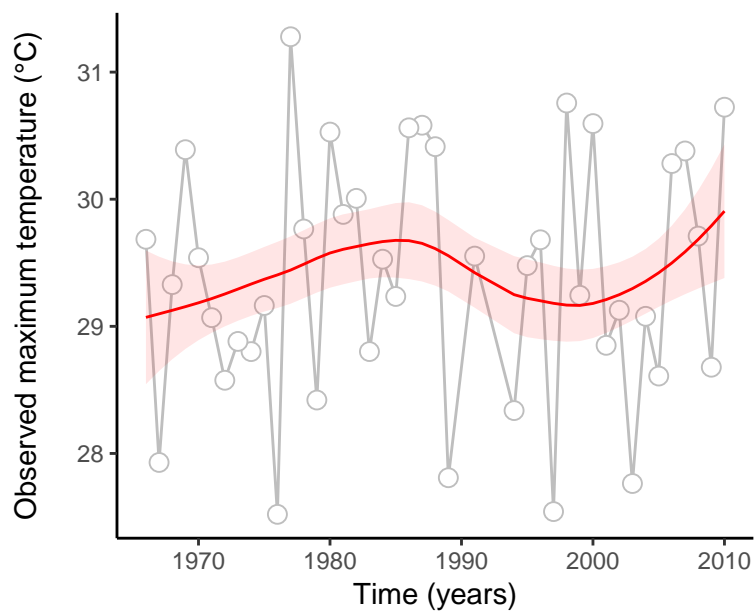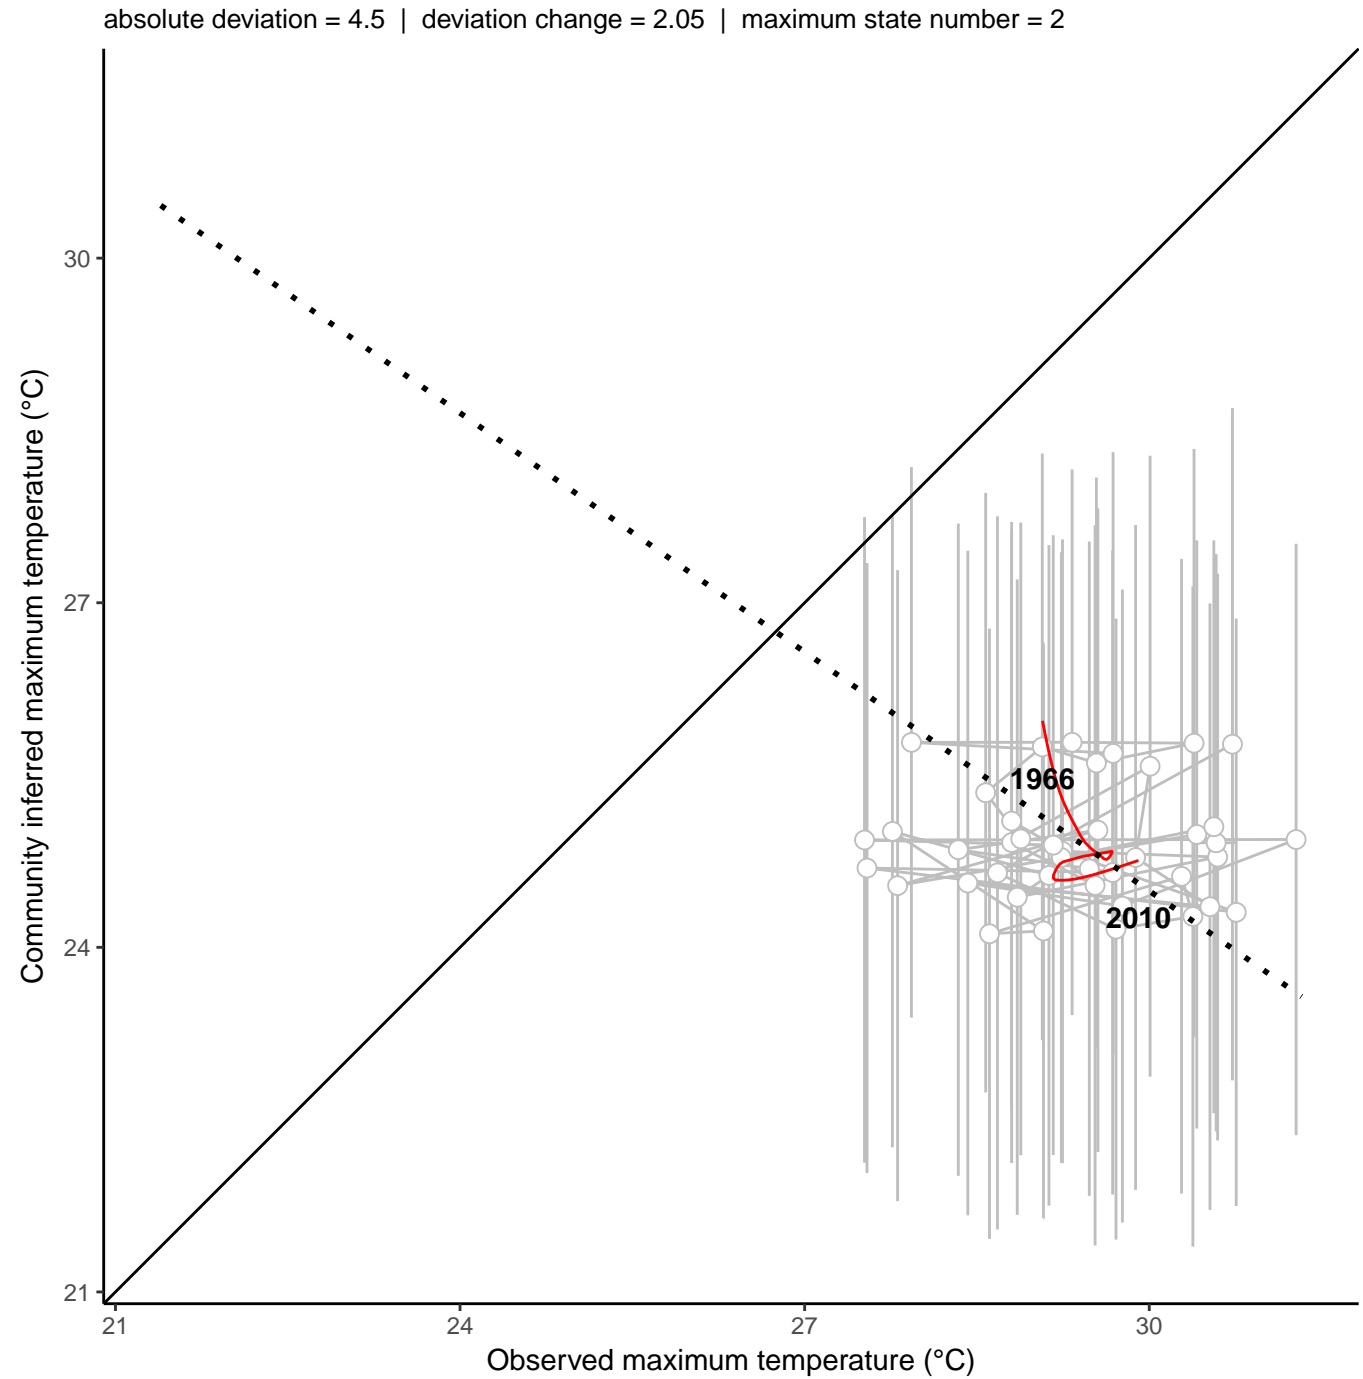

site : 840\_51\_10

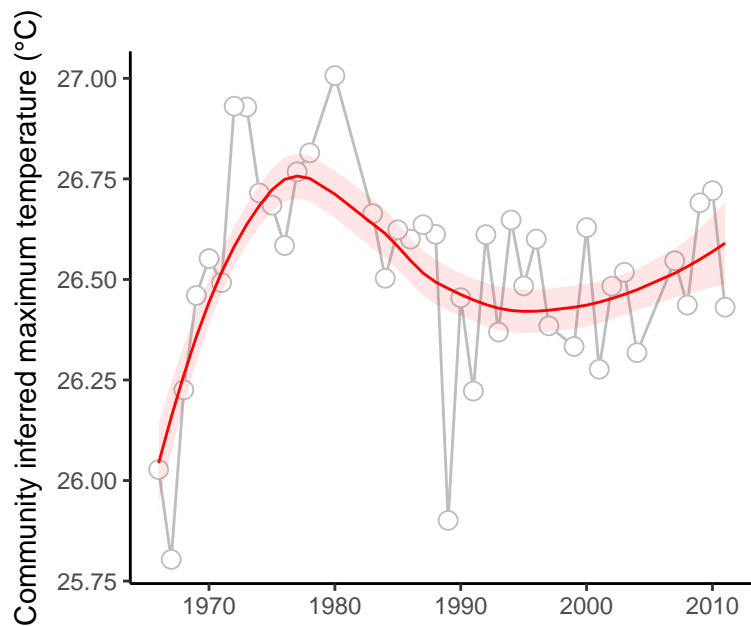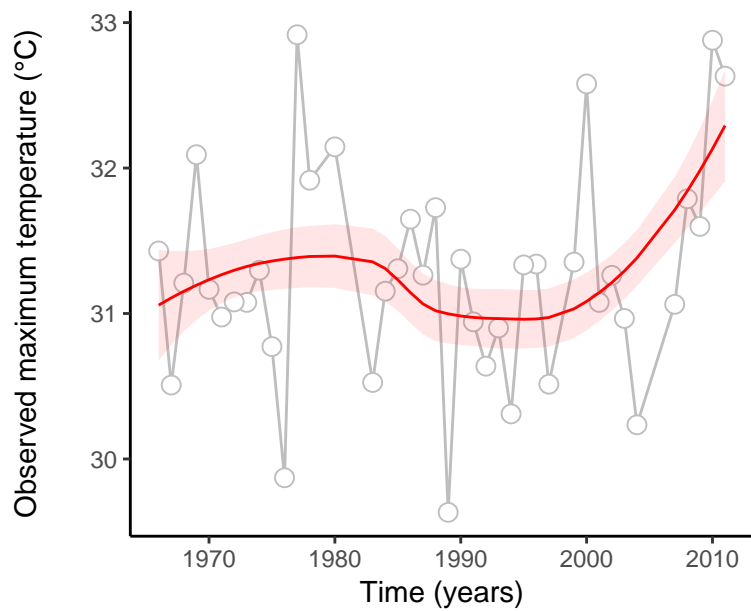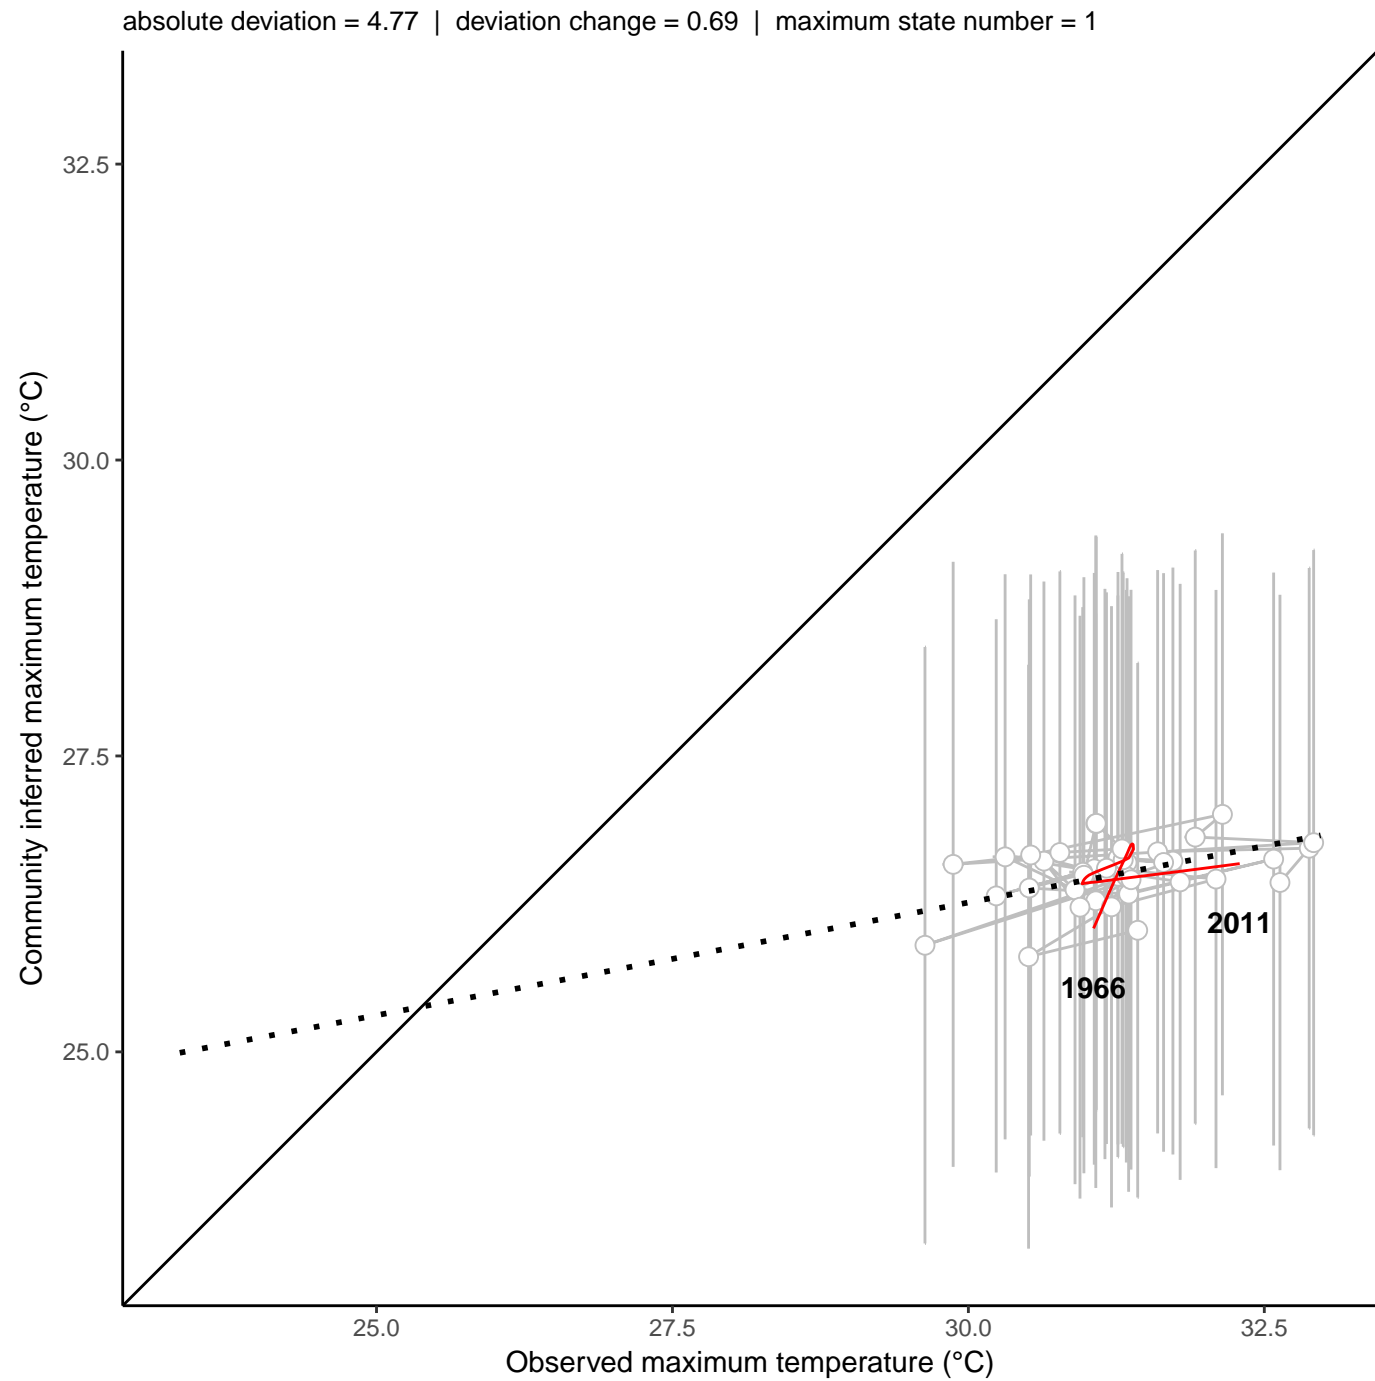

site : 840\_61\_9

absolute deviation = 1.37 | deviation change = 0.5 | maximum state number = 1

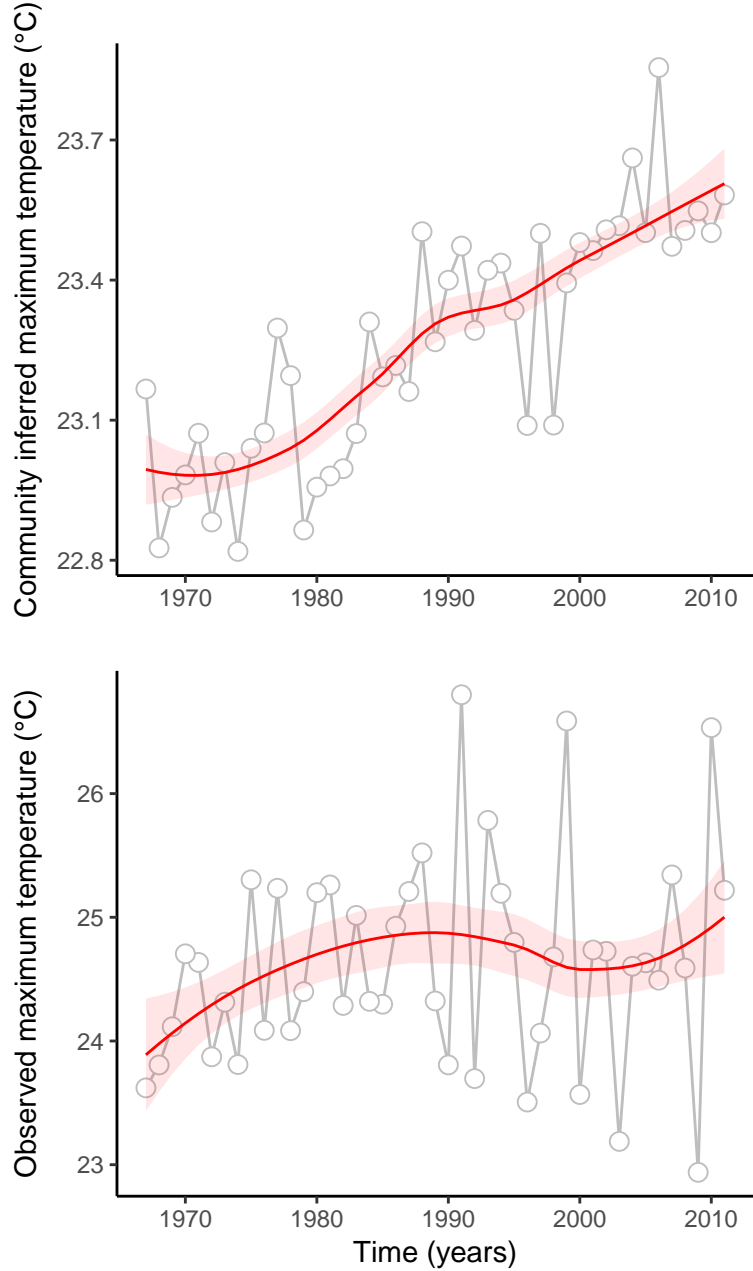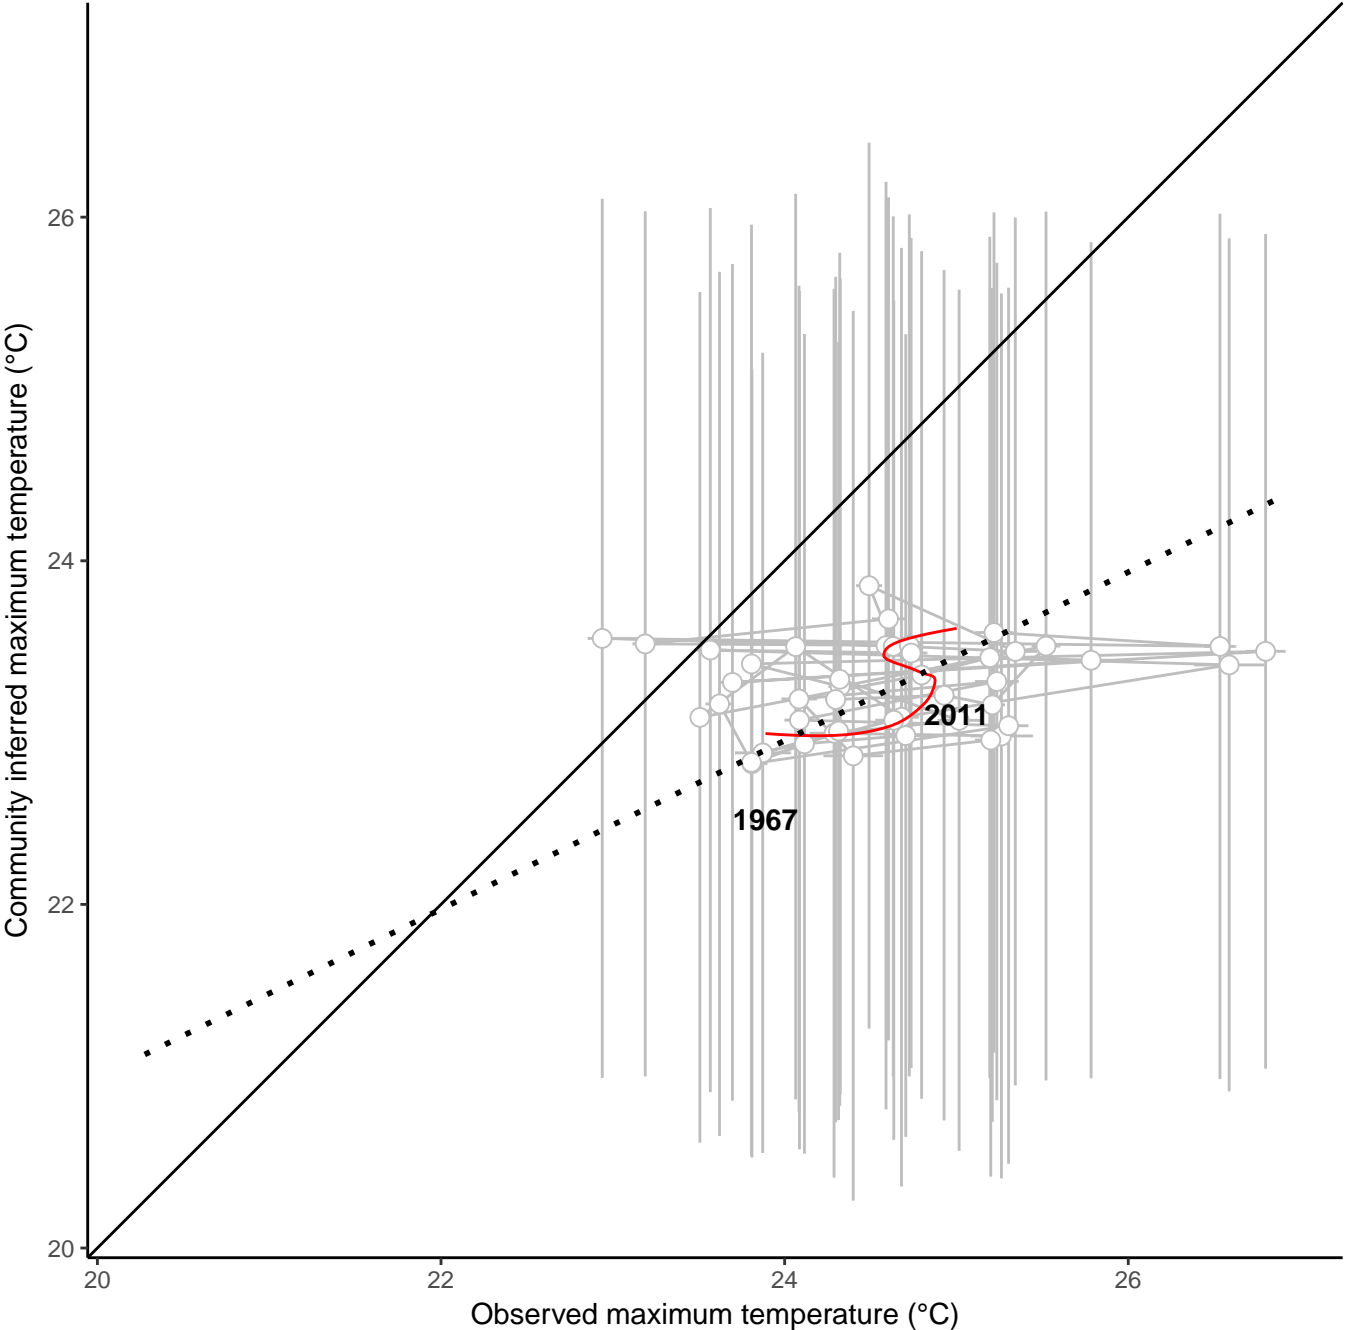

site : 840\_66\_21

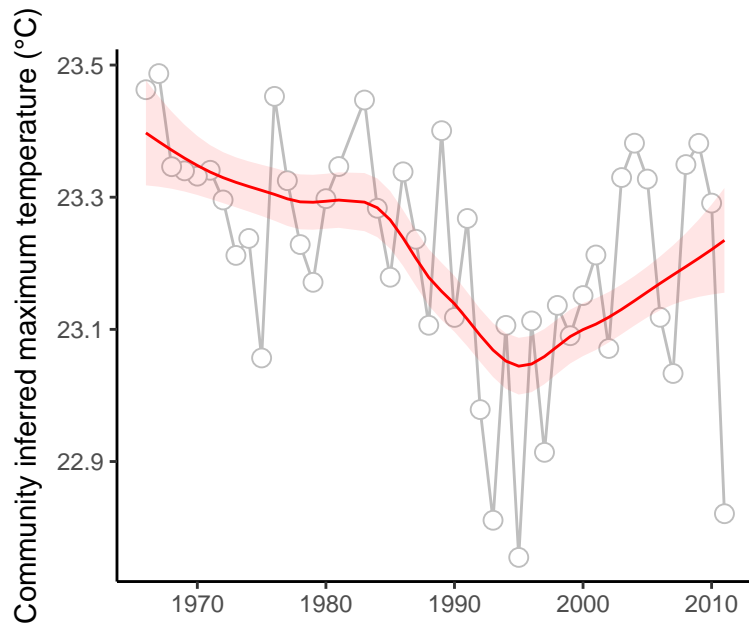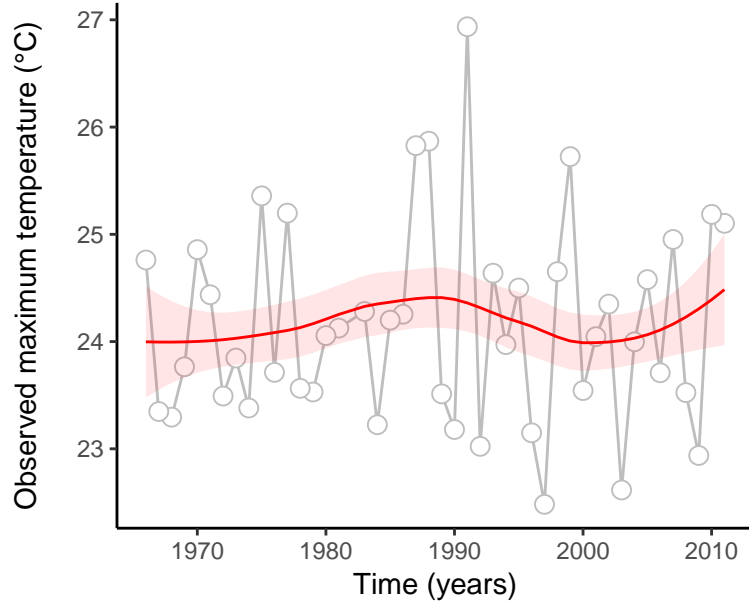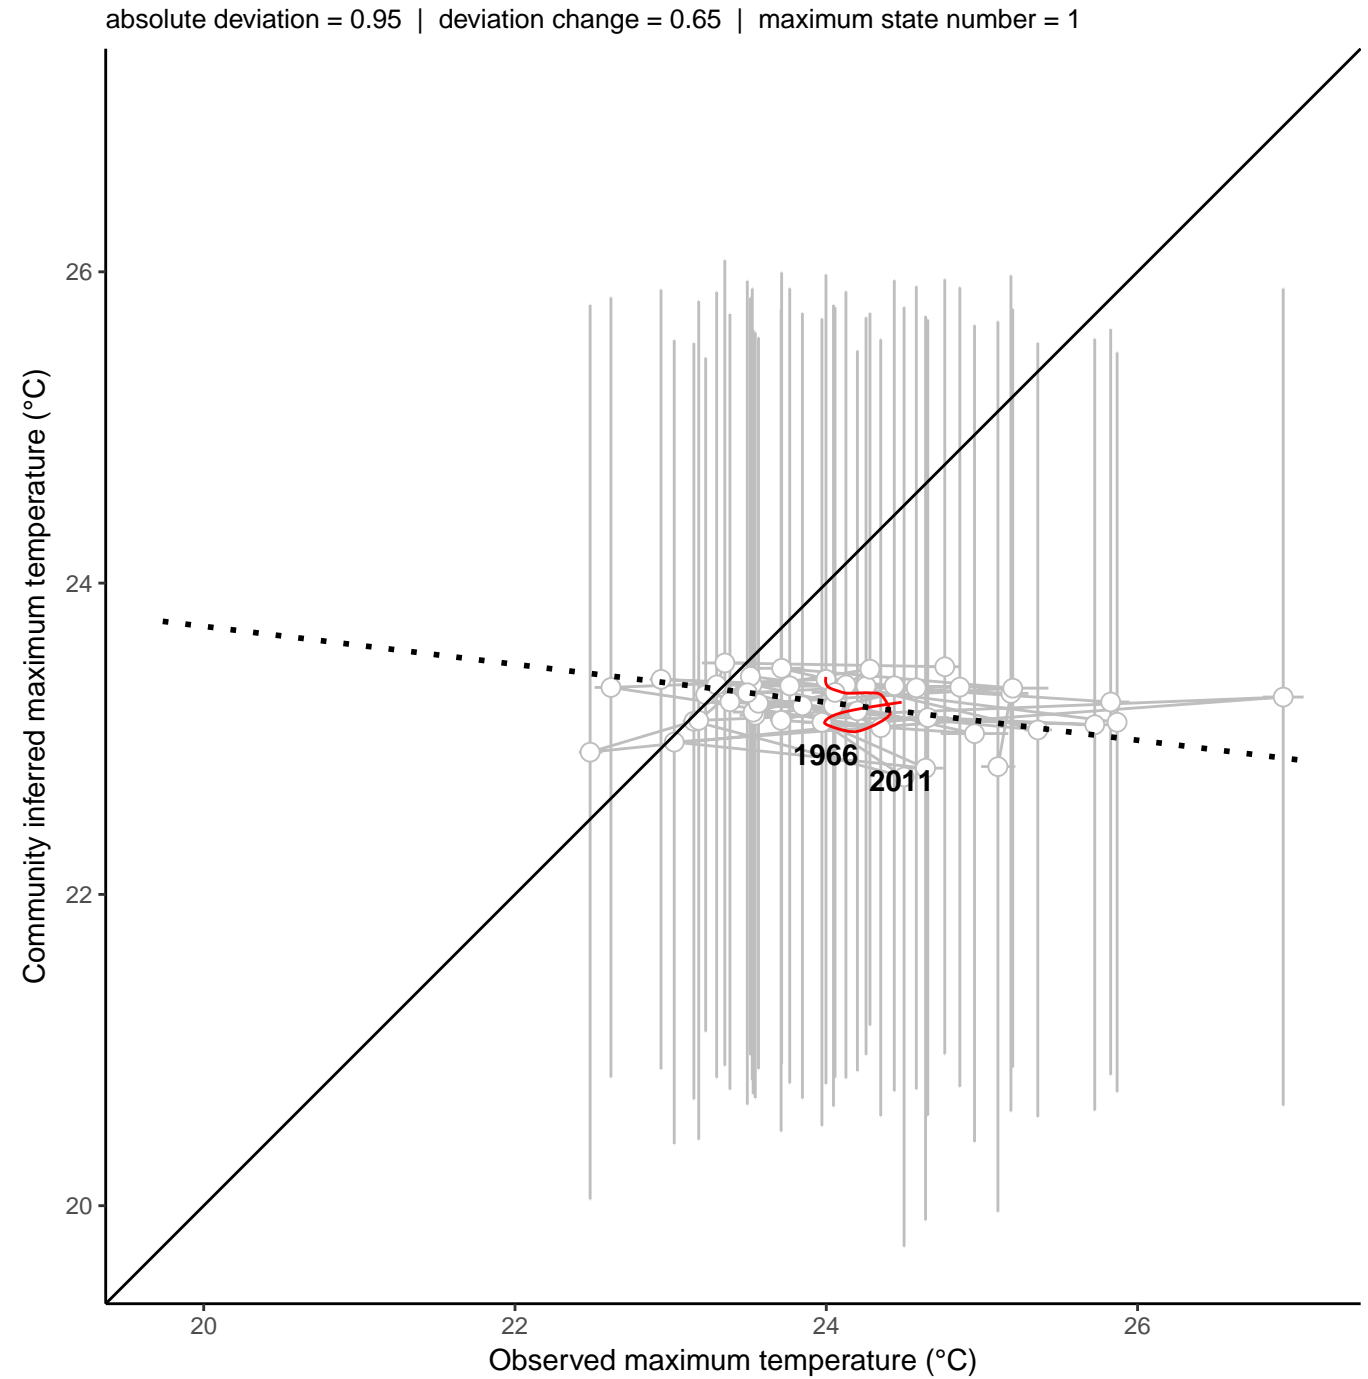

site : 840\_66\_33

absolute deviation = 2.69 | deviation change = 1.82 | maximum state number = 1

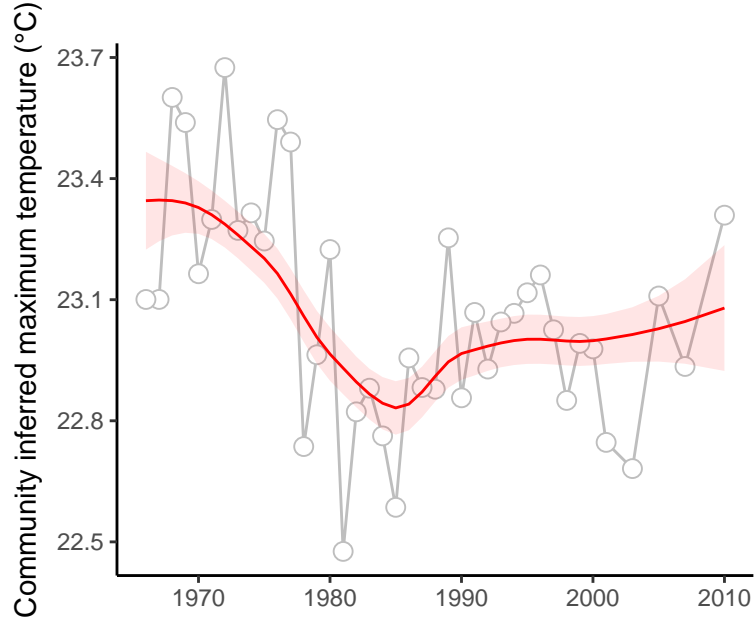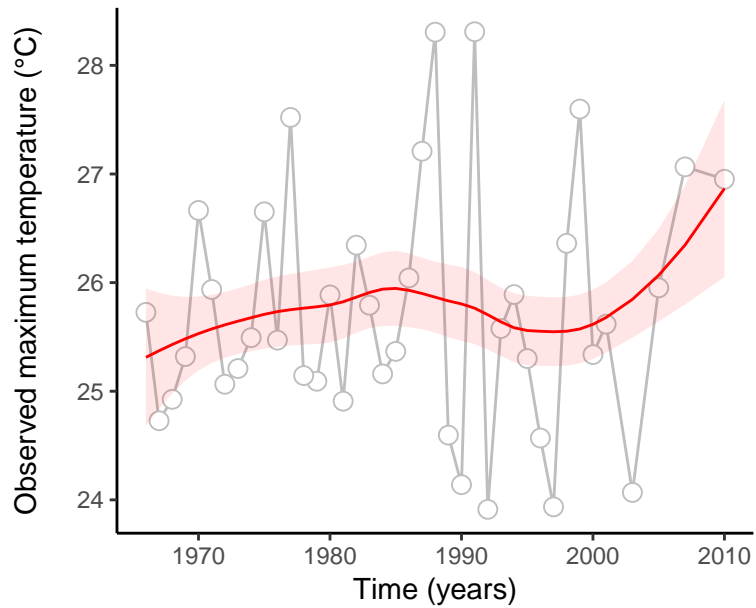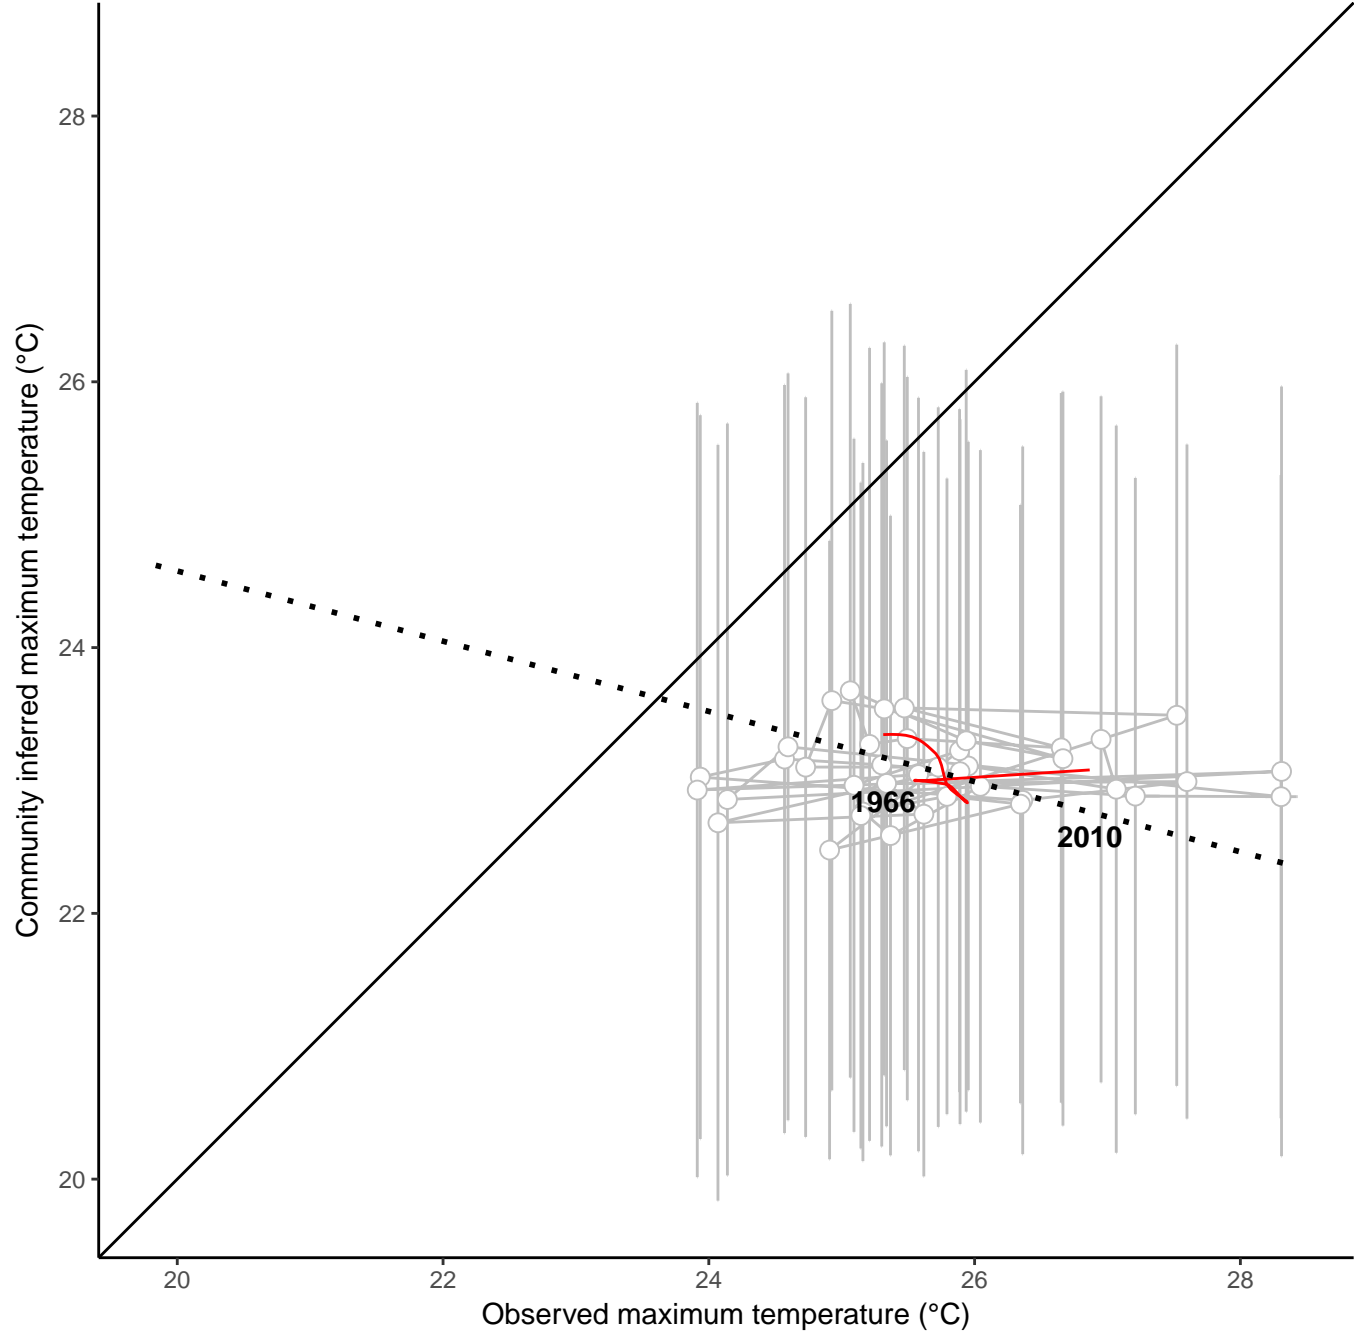

site : 840\_66\_82

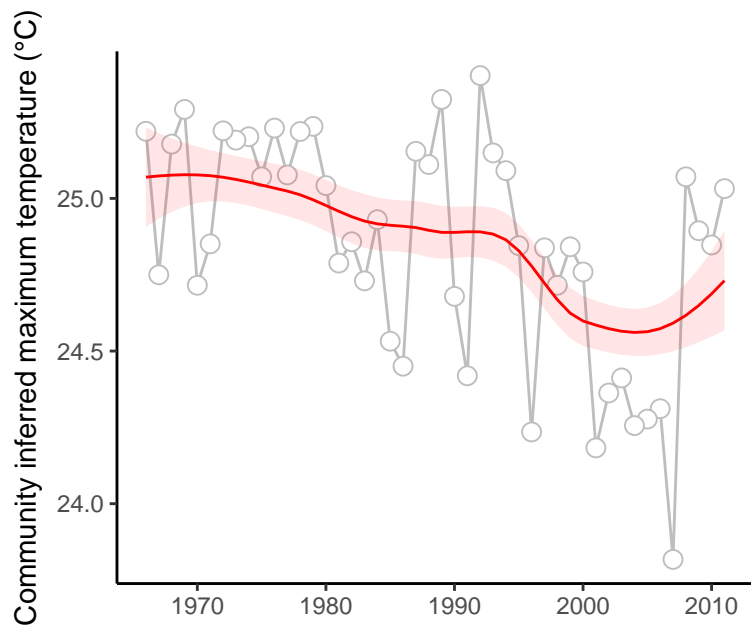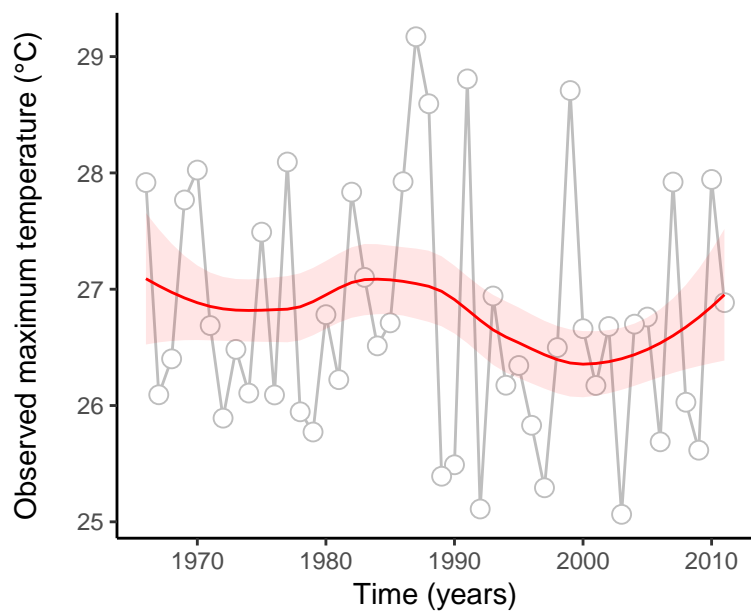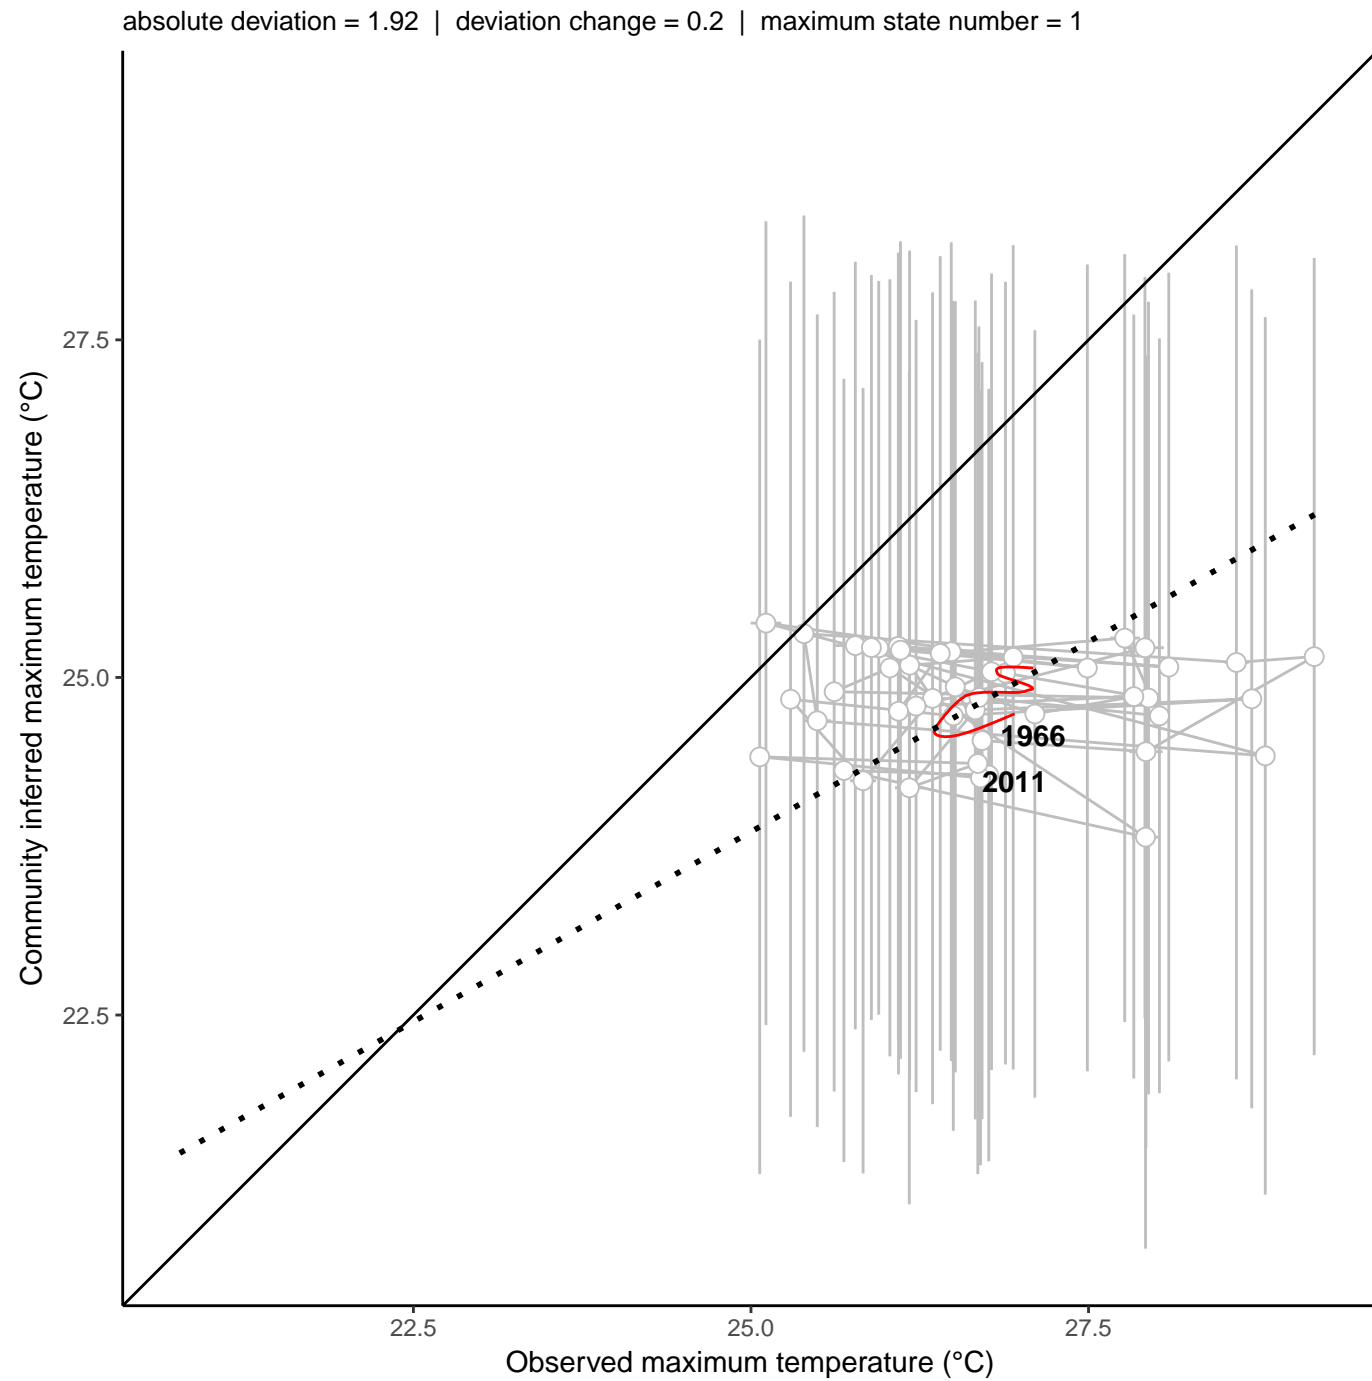



site : 840\_72\_30

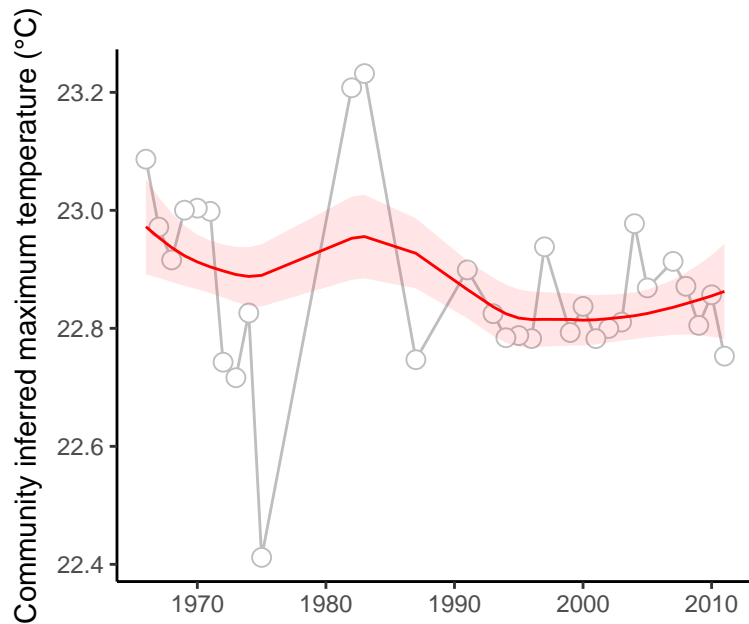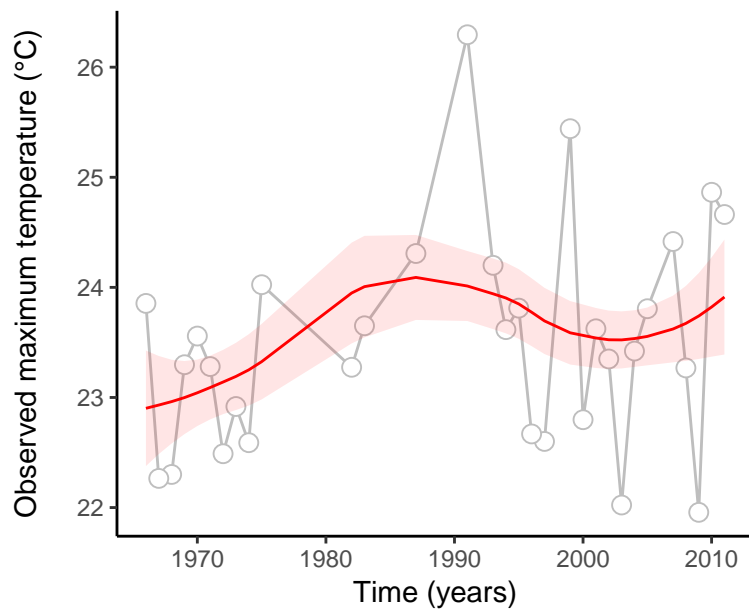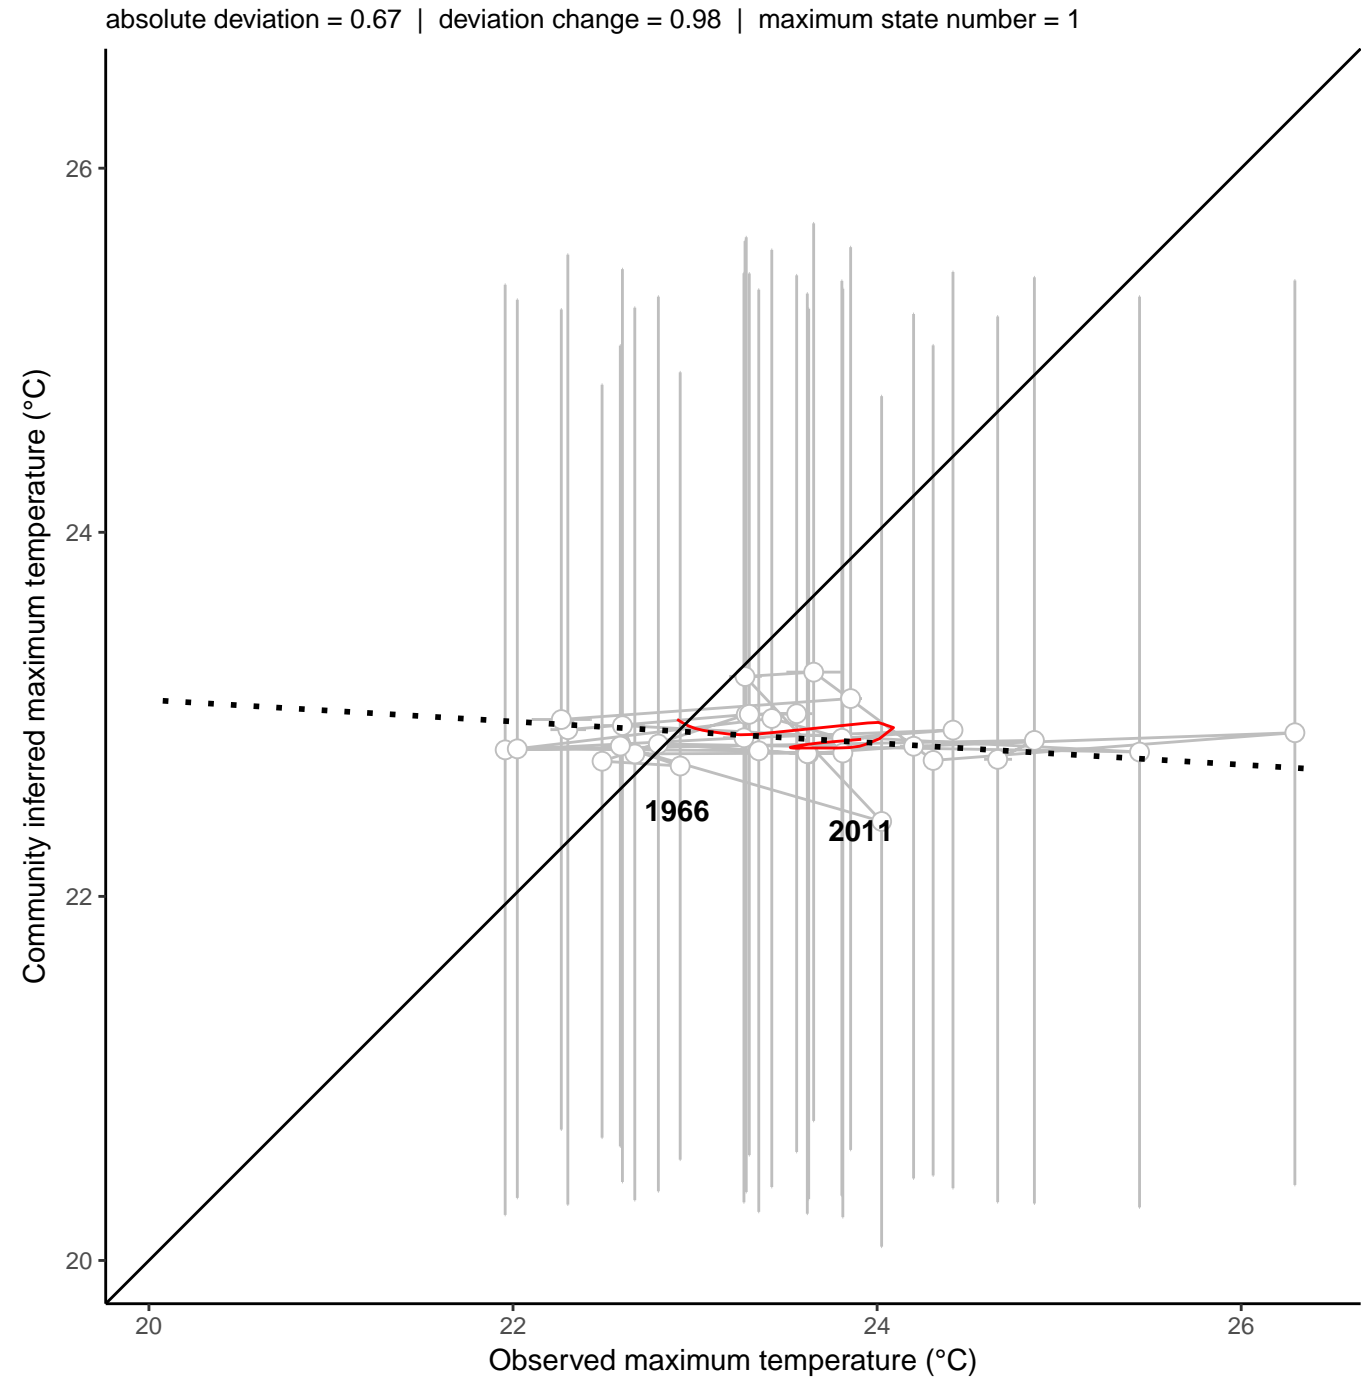

site : 840\_80\_4

absolute deviation = 3.86 | deviation change = 1.38 | maximum state number = 1

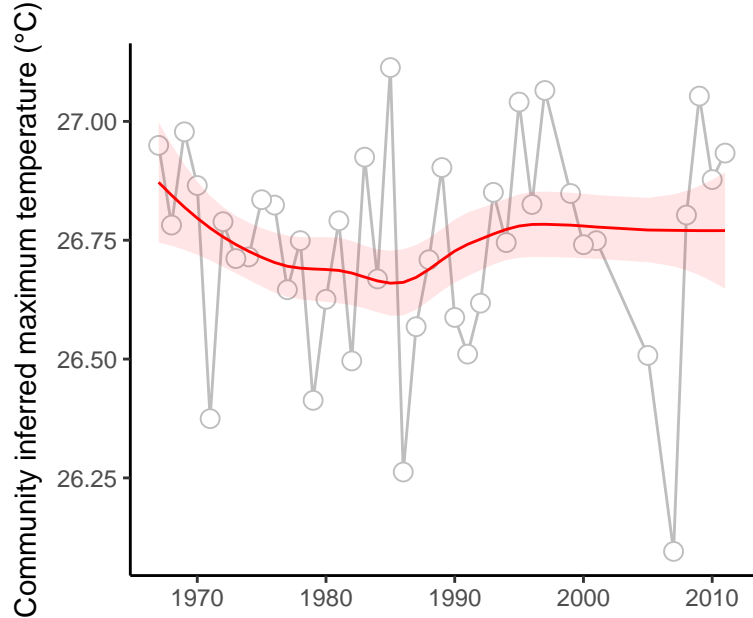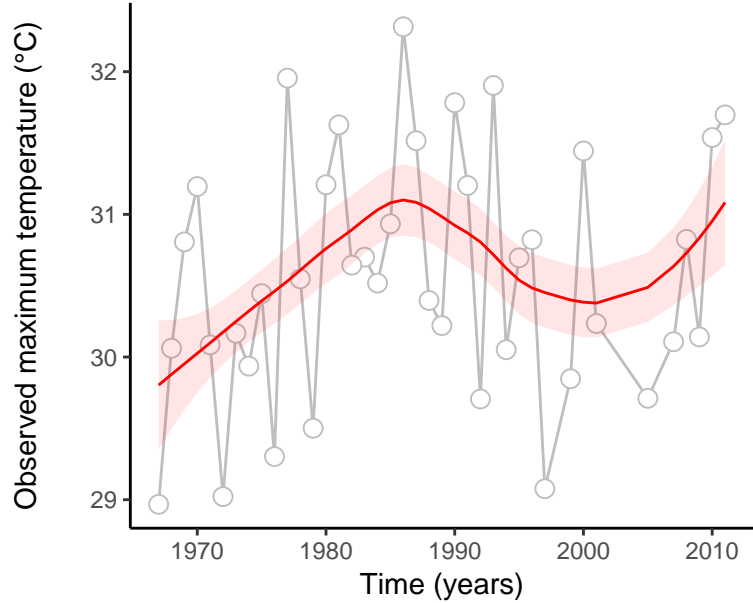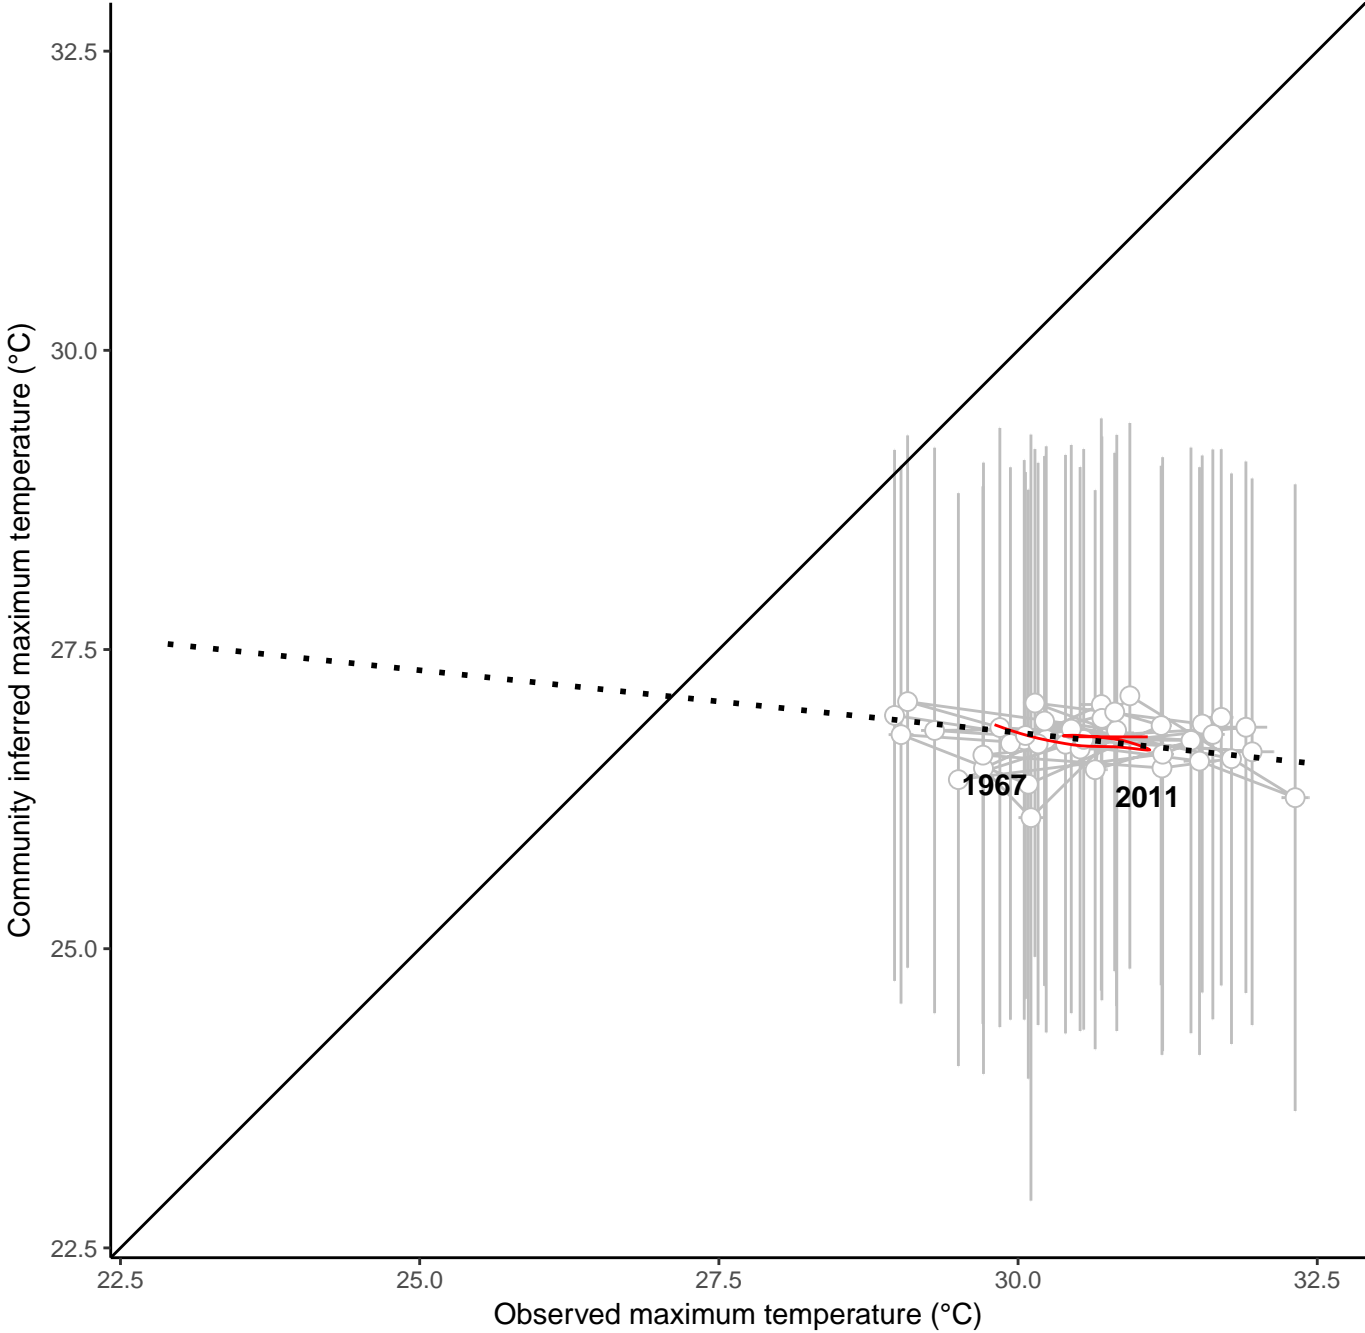

site : 840\_82\_13

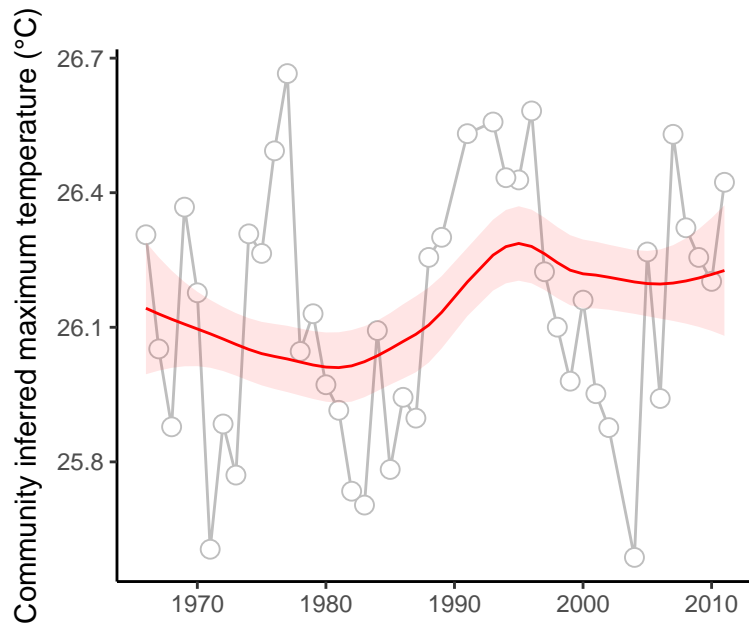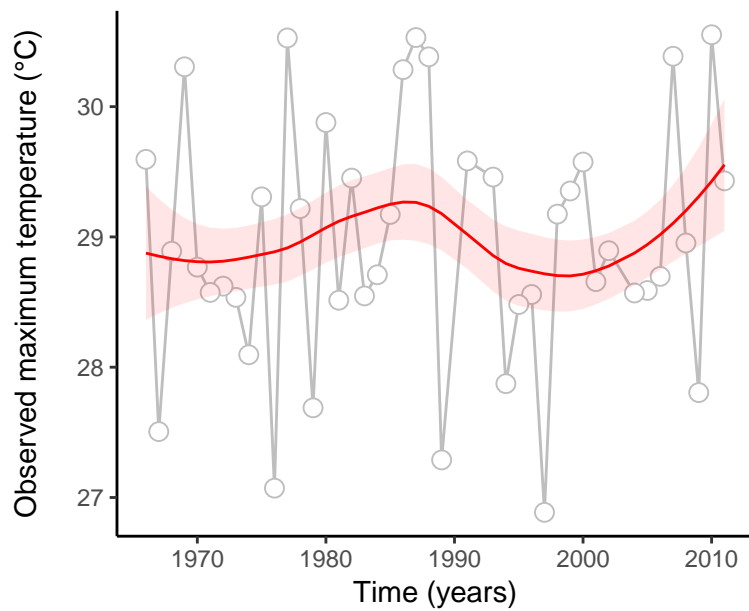

absolute deviation = 2.84 | deviation change = 0.59 | maximum state number = 1

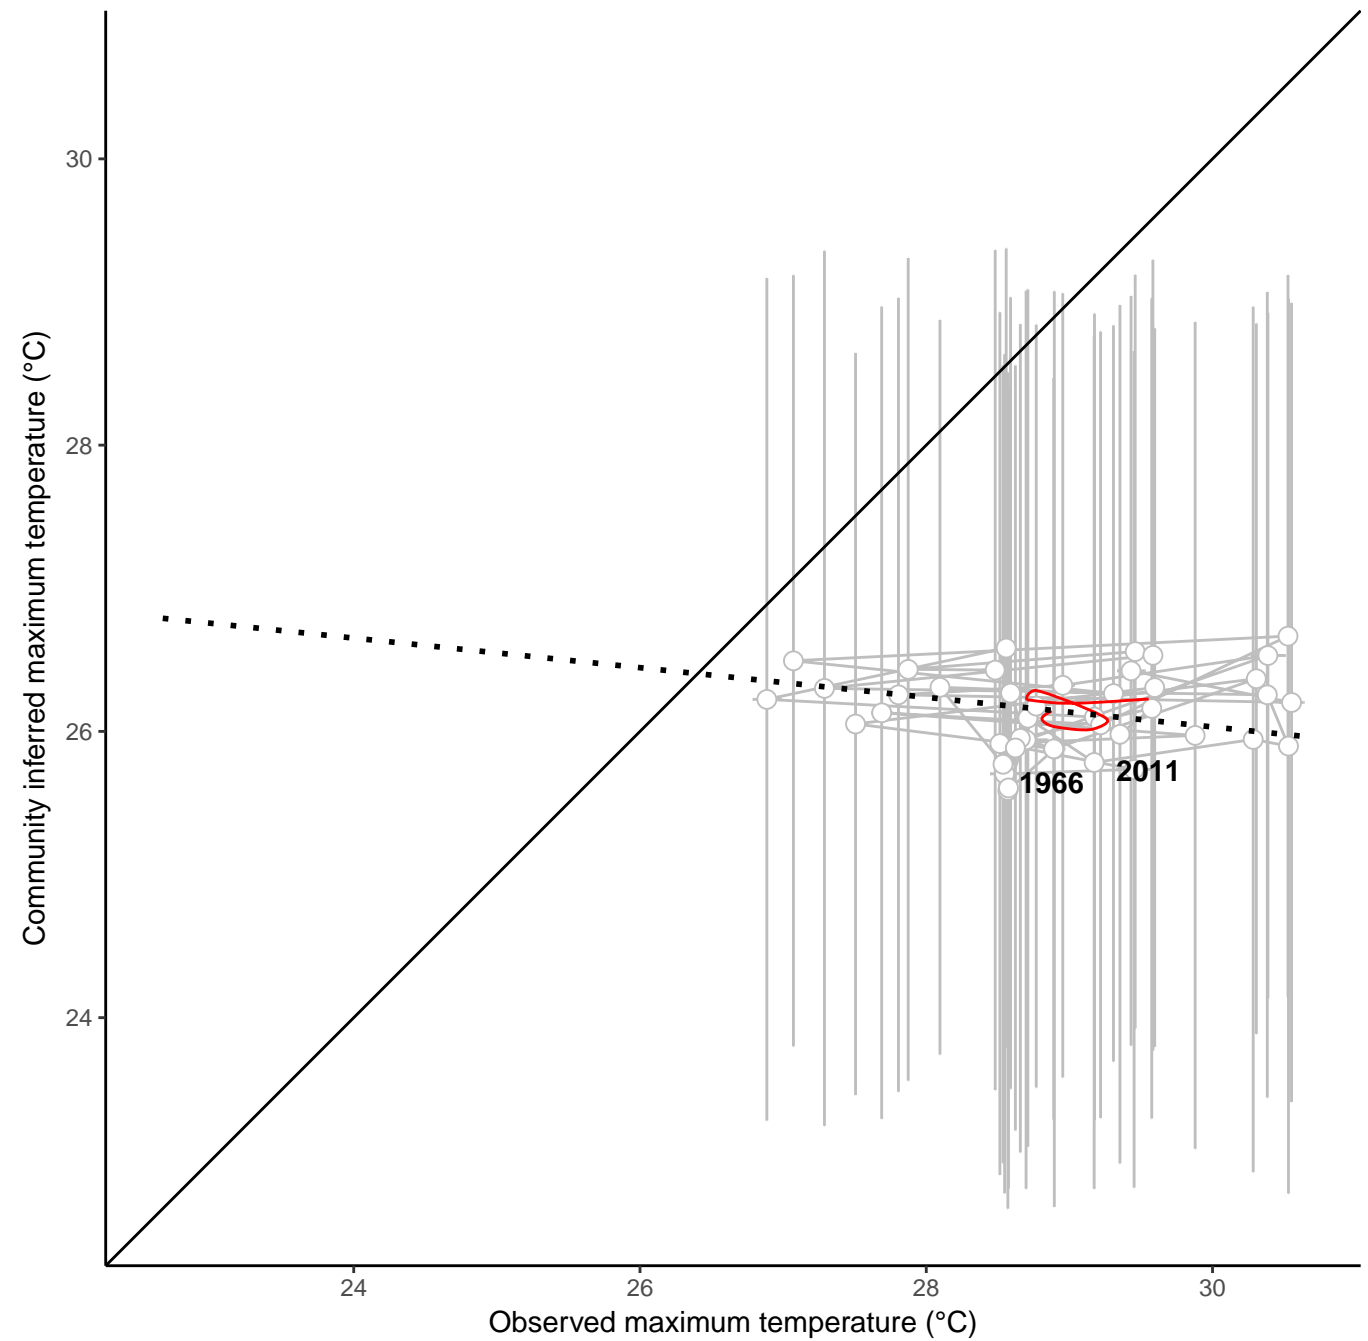

site : 840\_90\_52

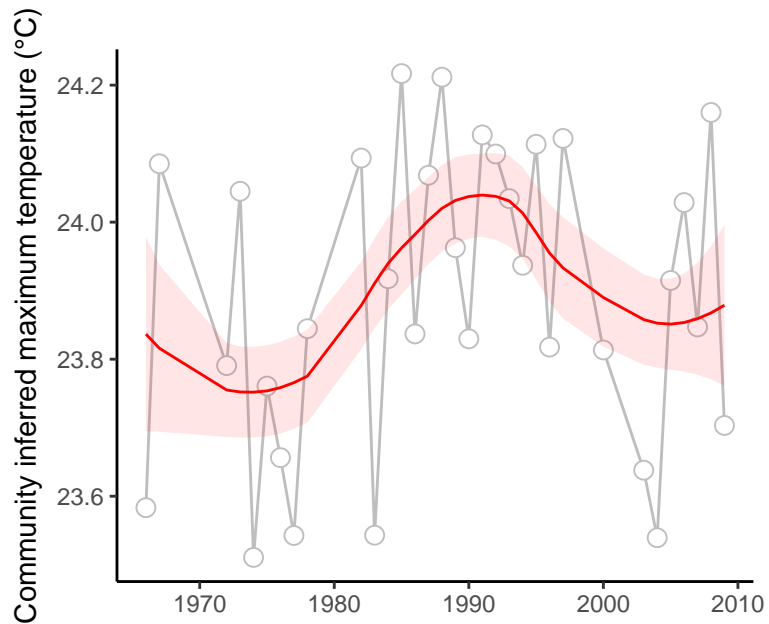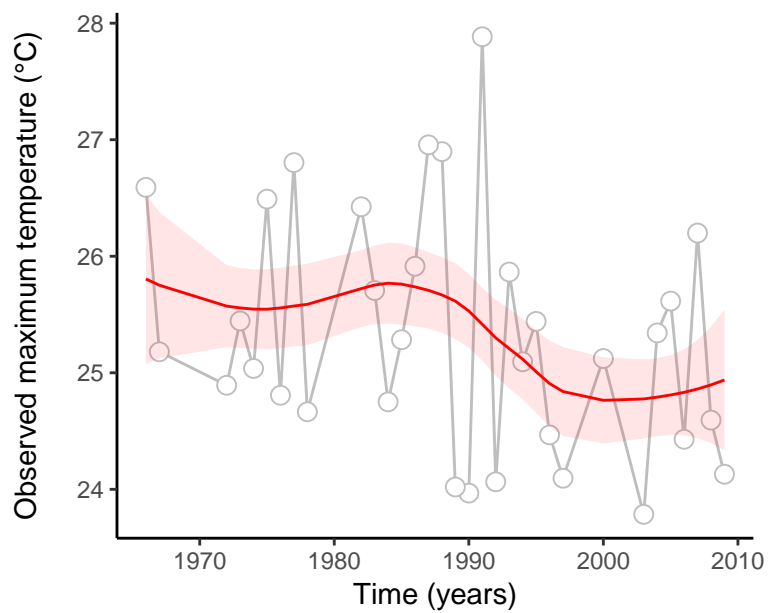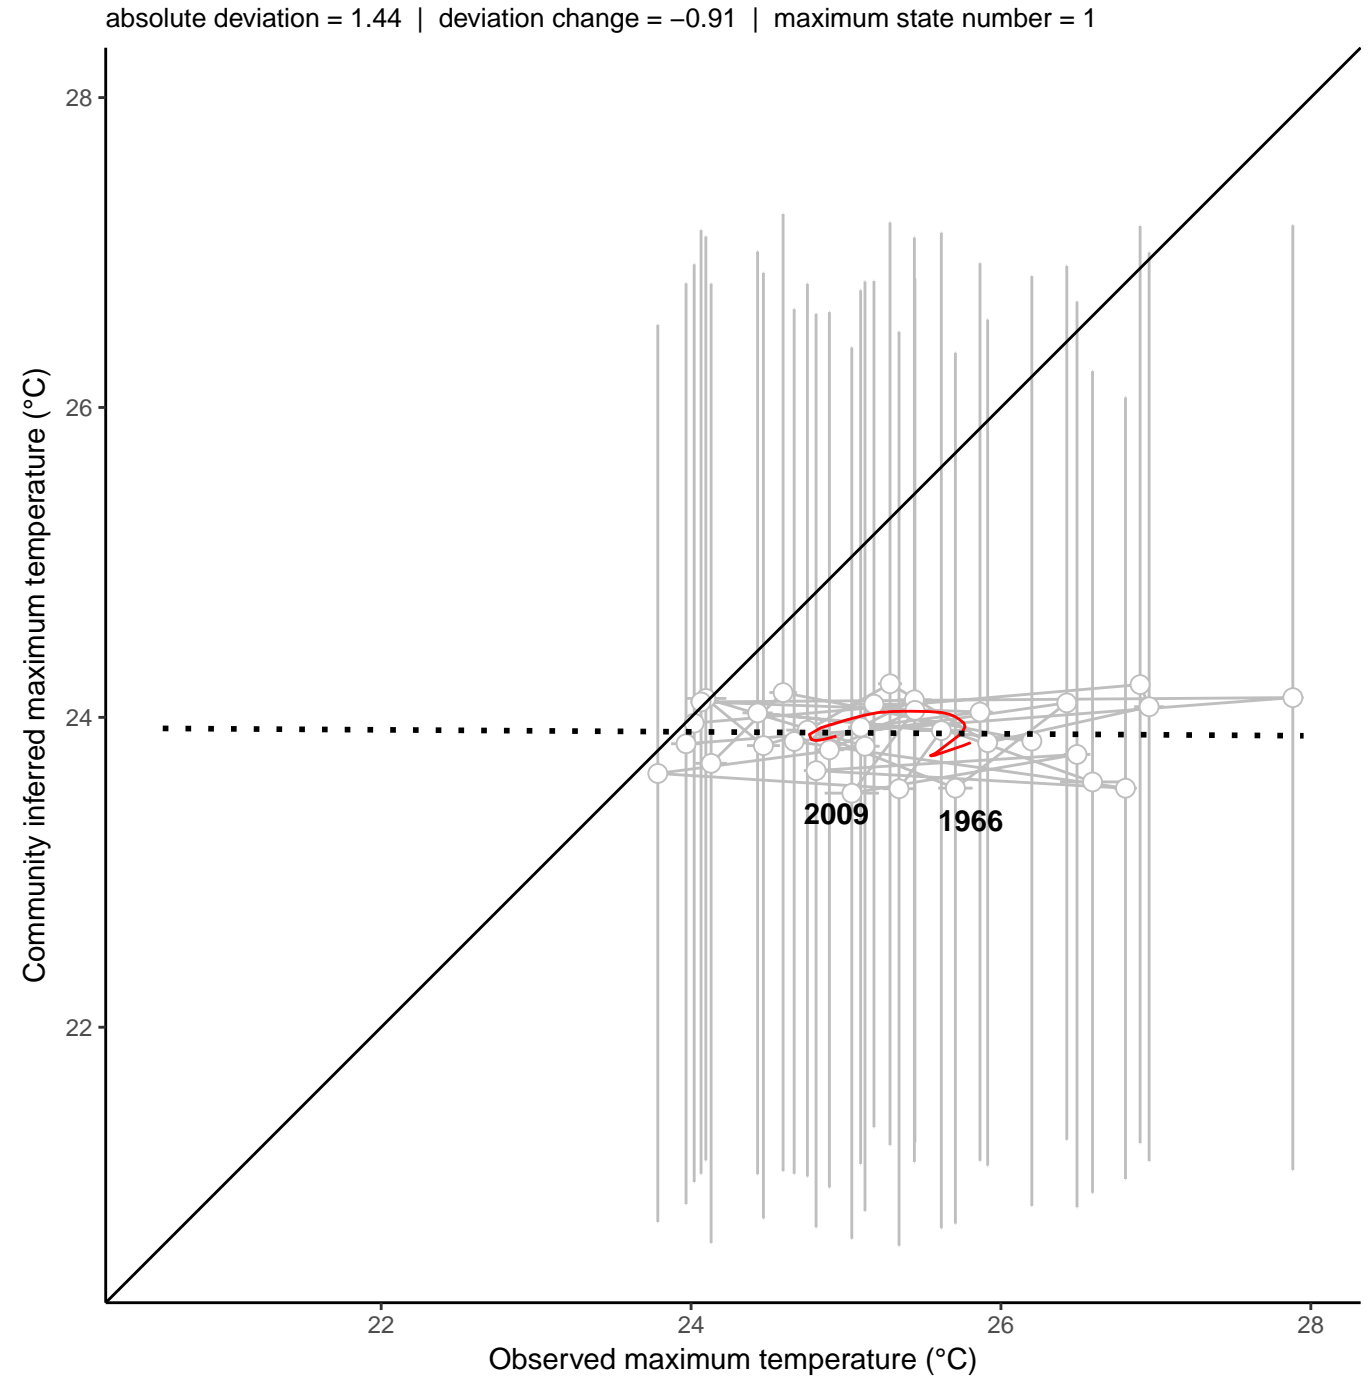

site : 840\_2\_19

absolute deviation = 4.53 | deviation change = 1.13 | maximum state number = 1

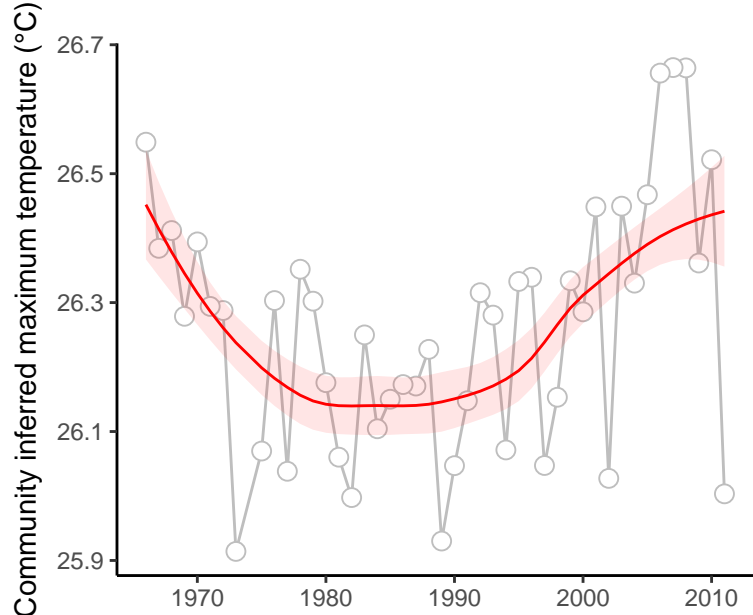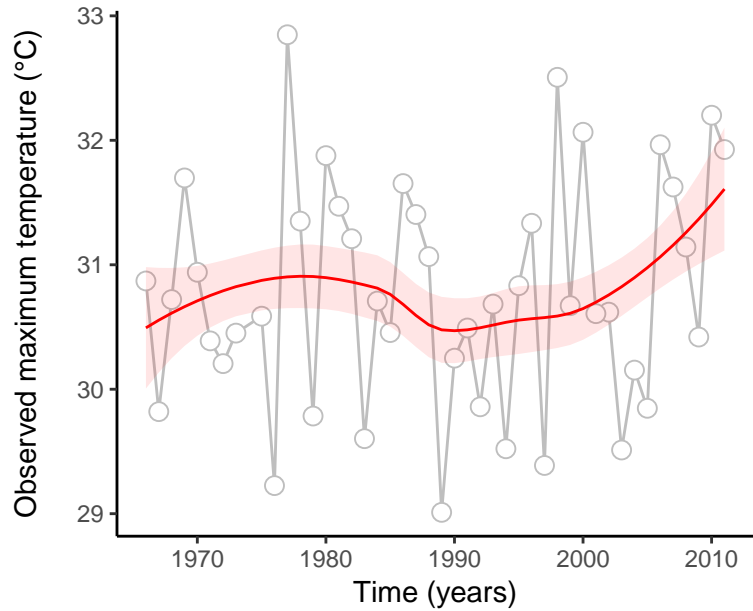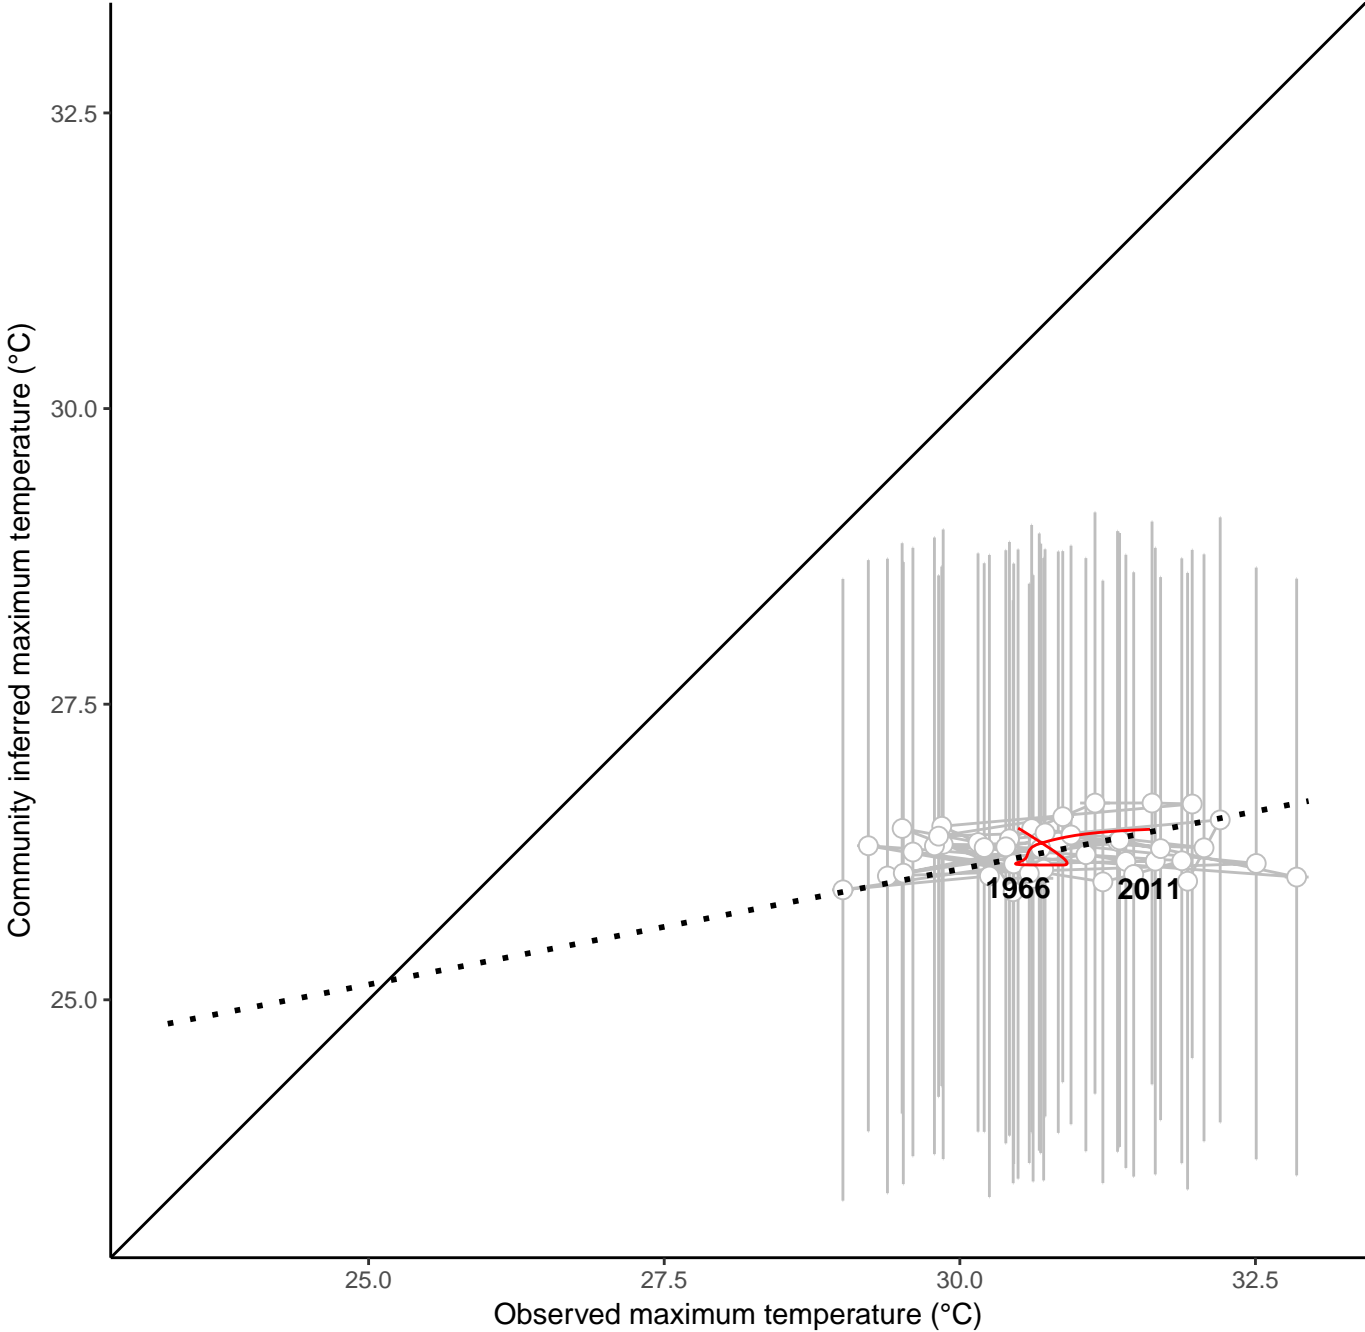

site : 840\_39\_26

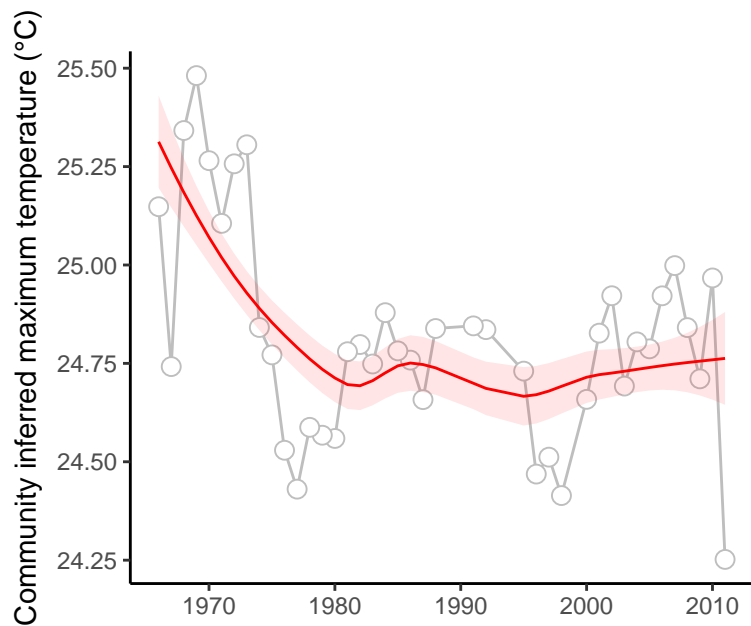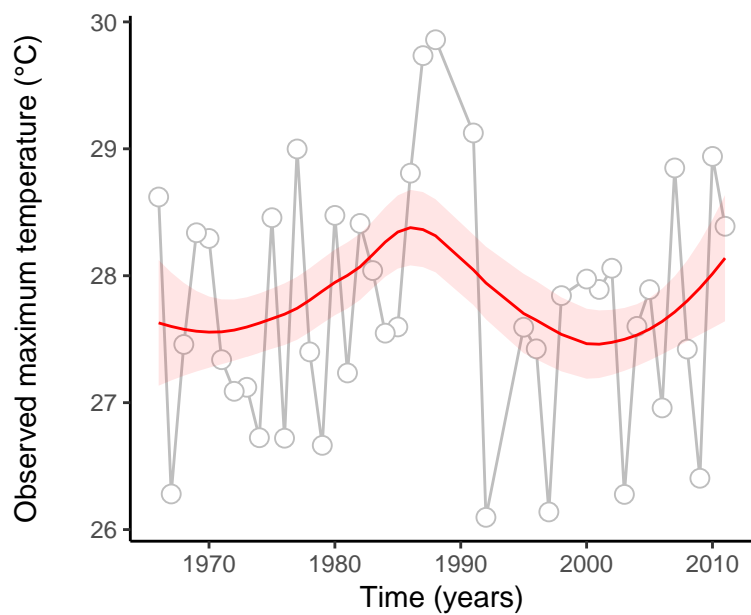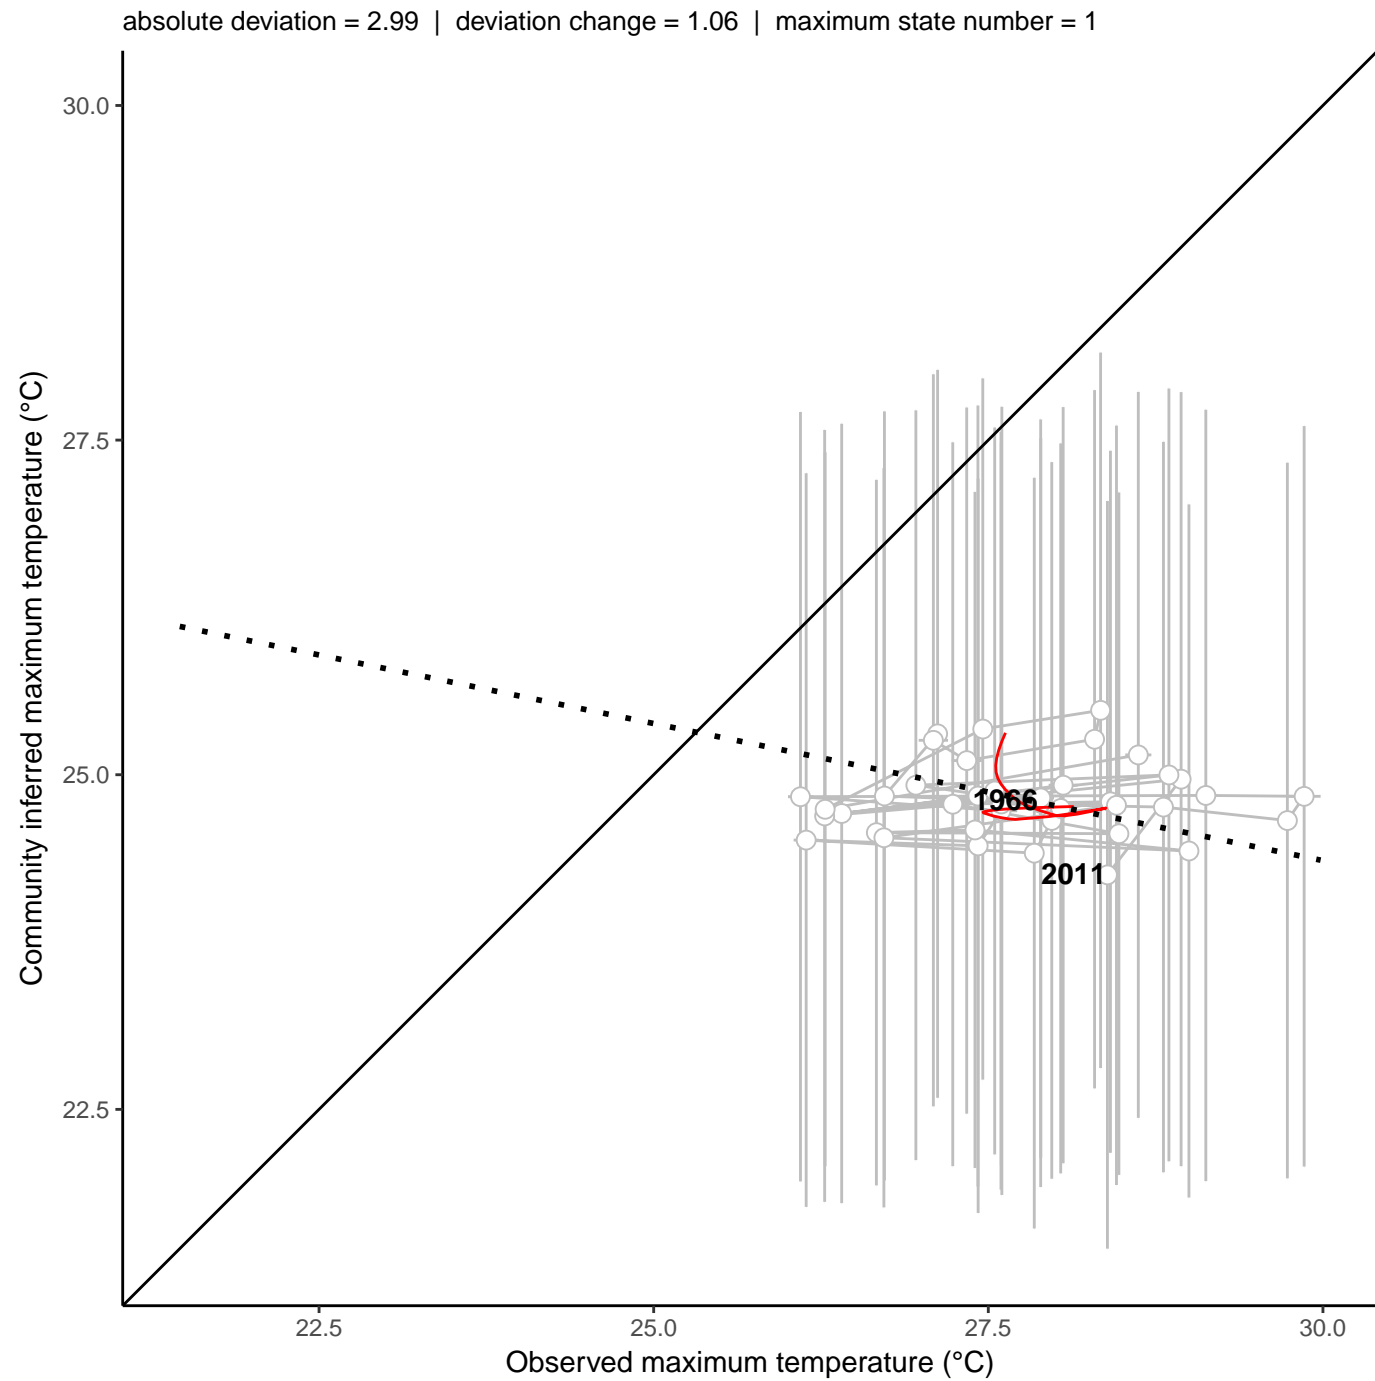

site : 840\_46\_48

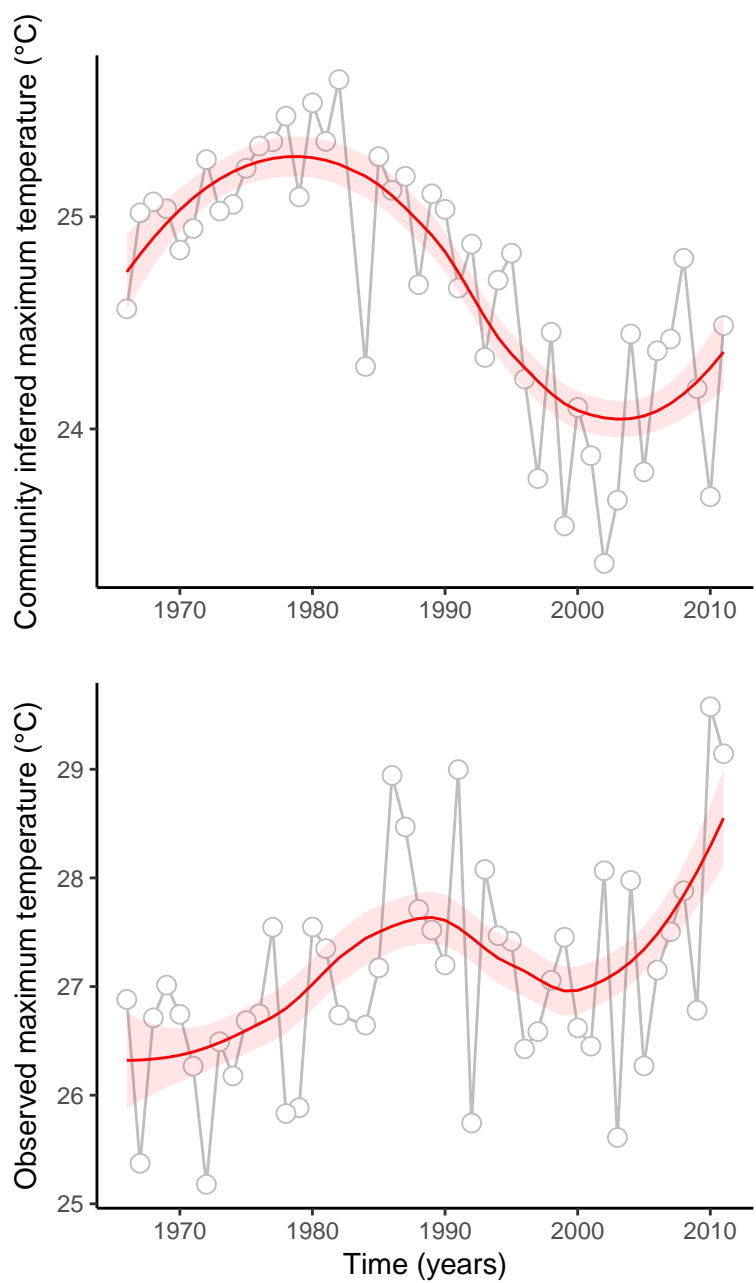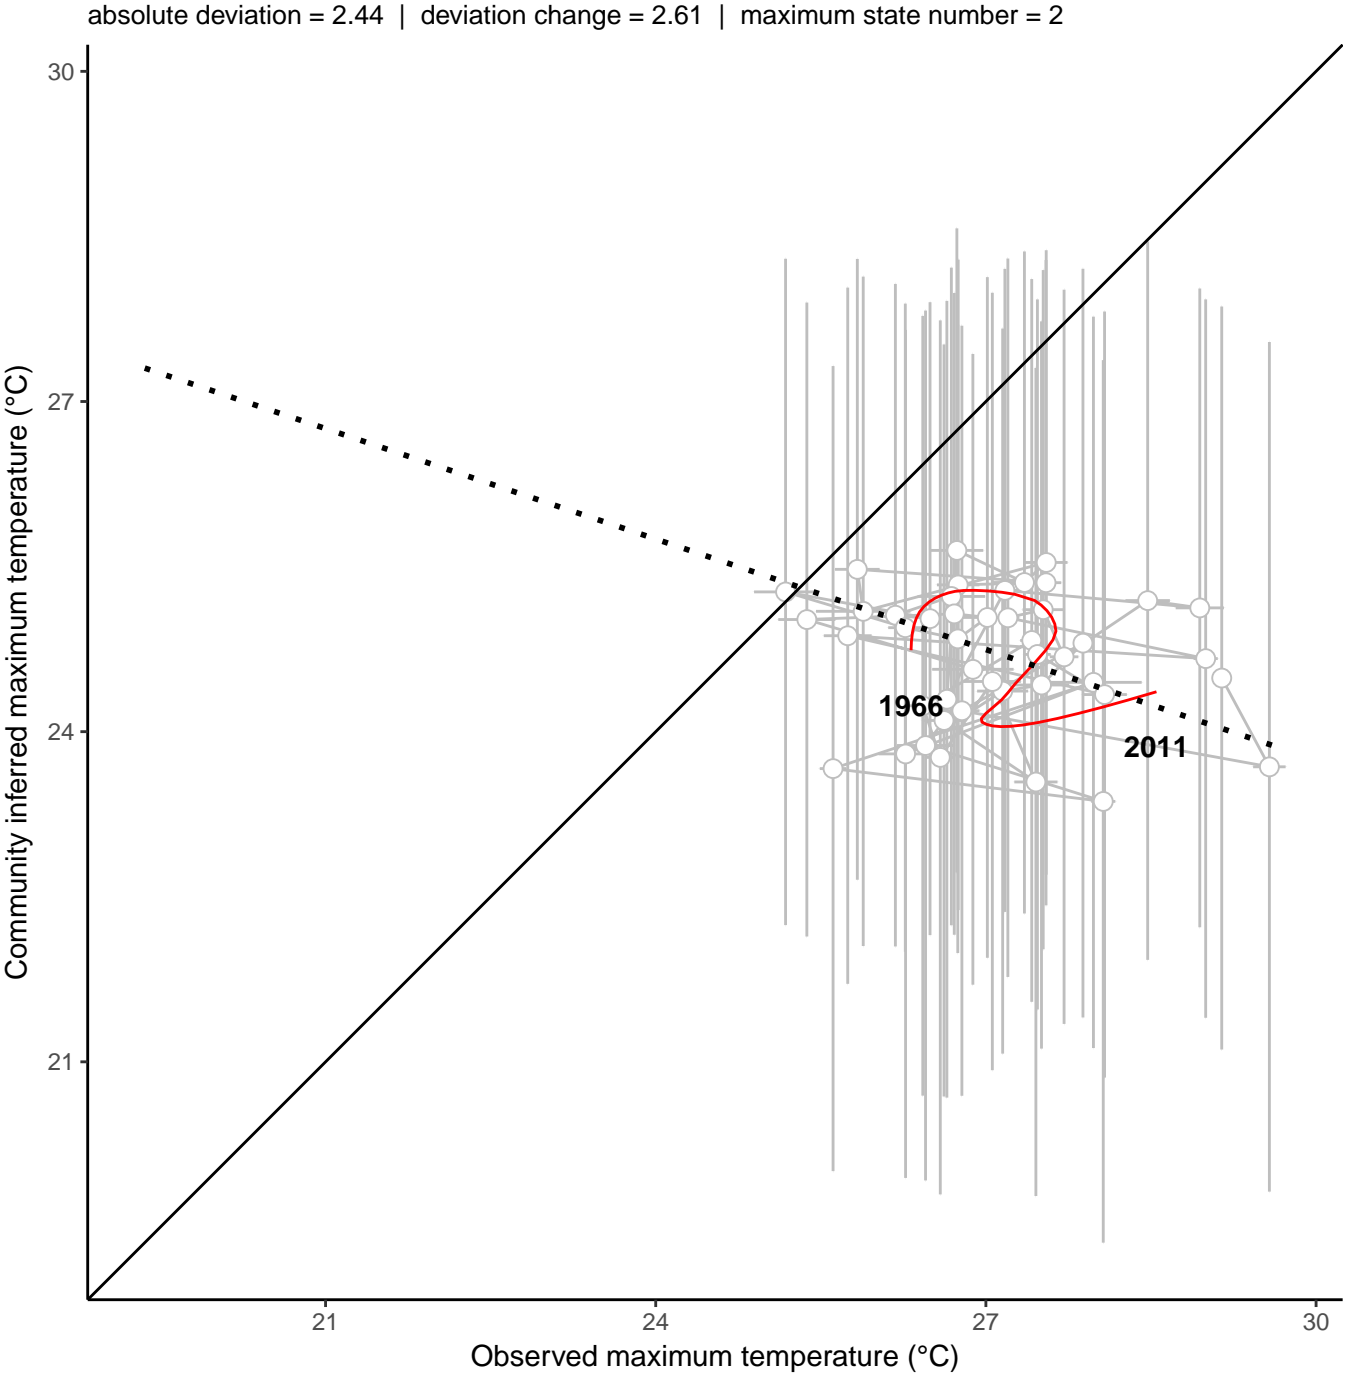

site : 840\_49\_58

absolute deviation = 2.13 | deviation change = 1.51 | maximum state number = 1

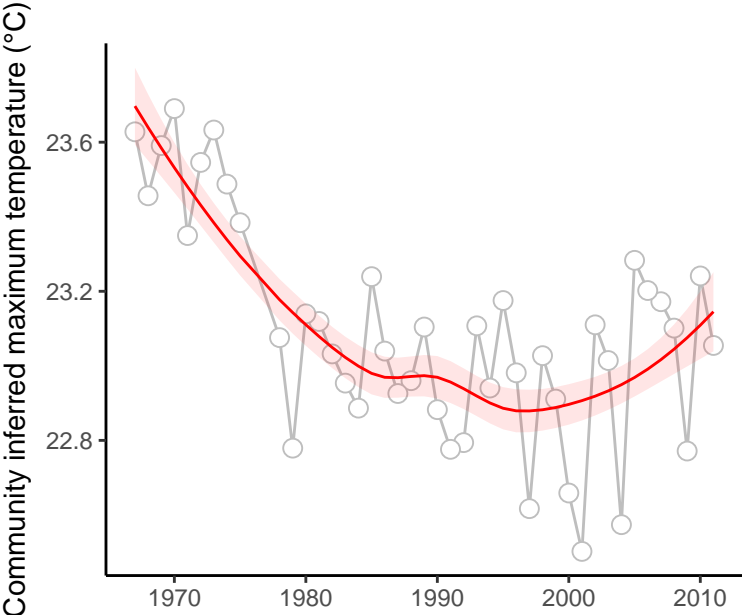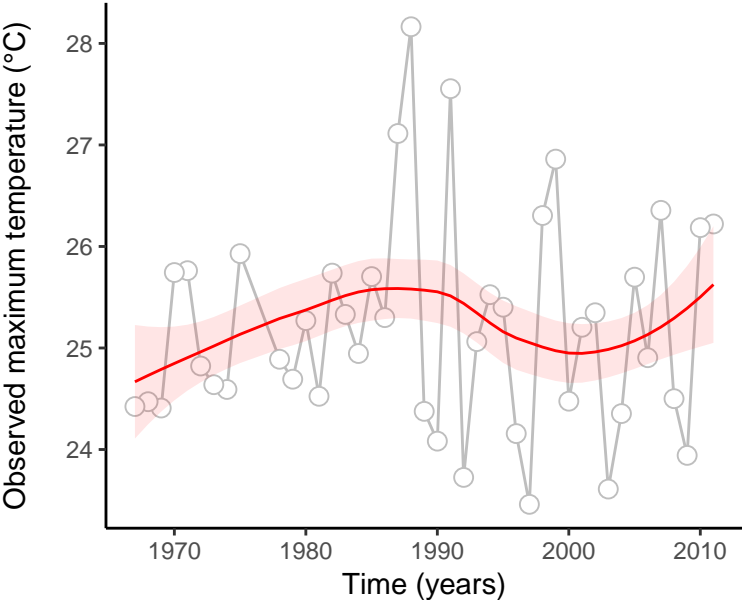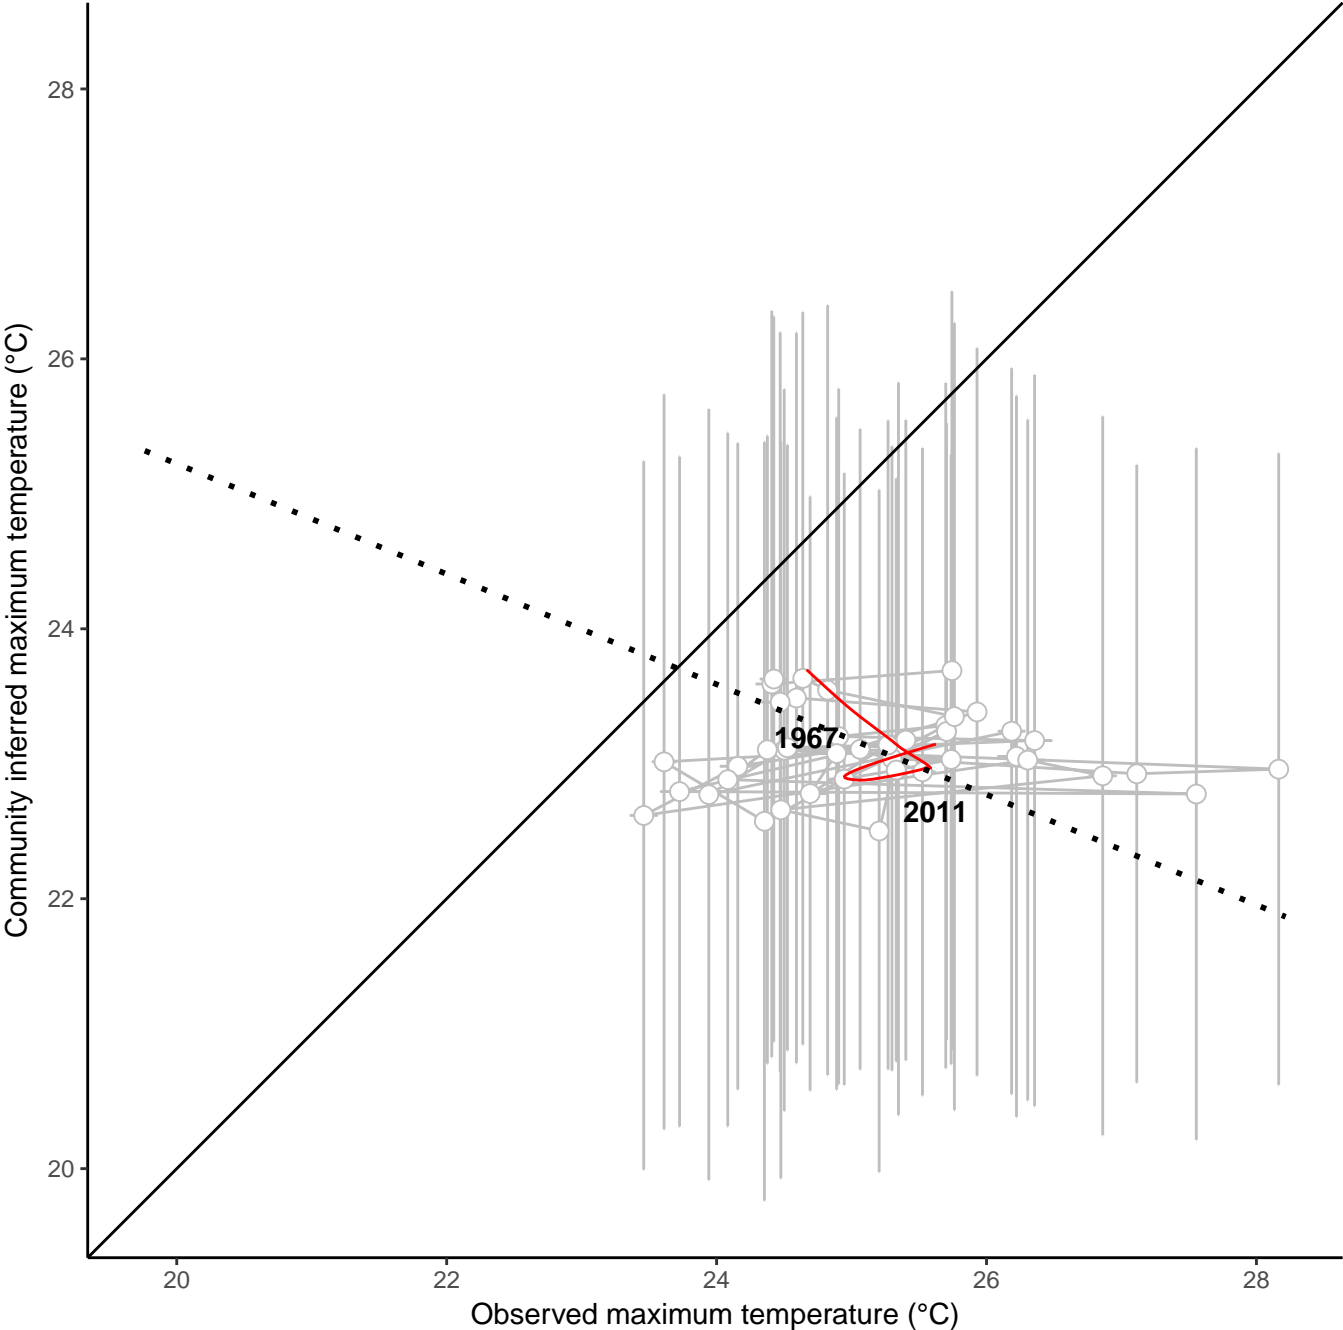



site : 840\_66\_17

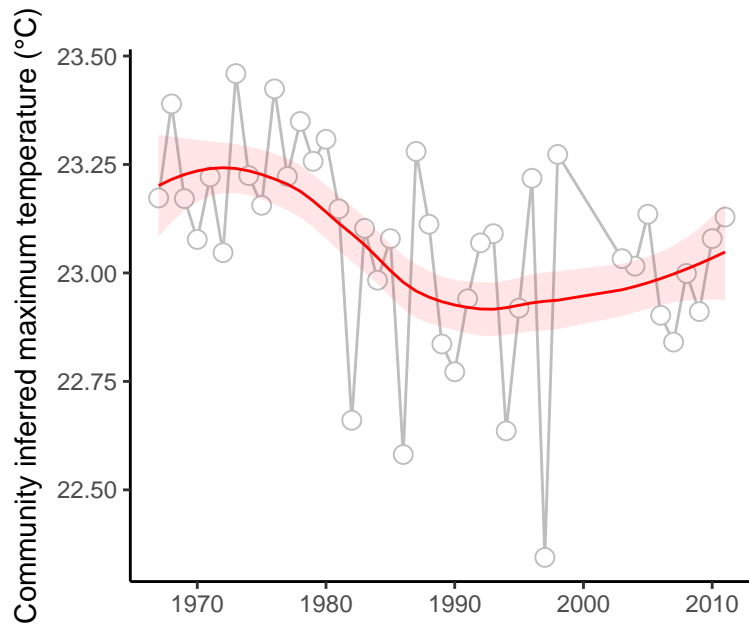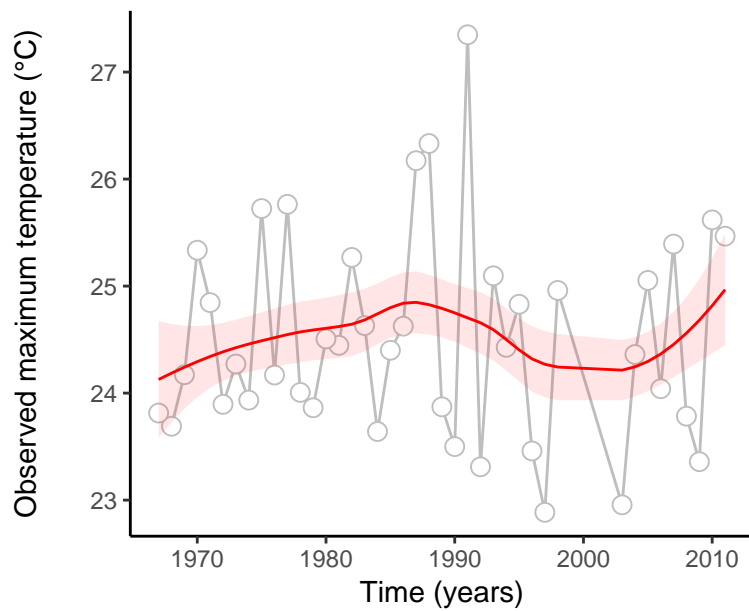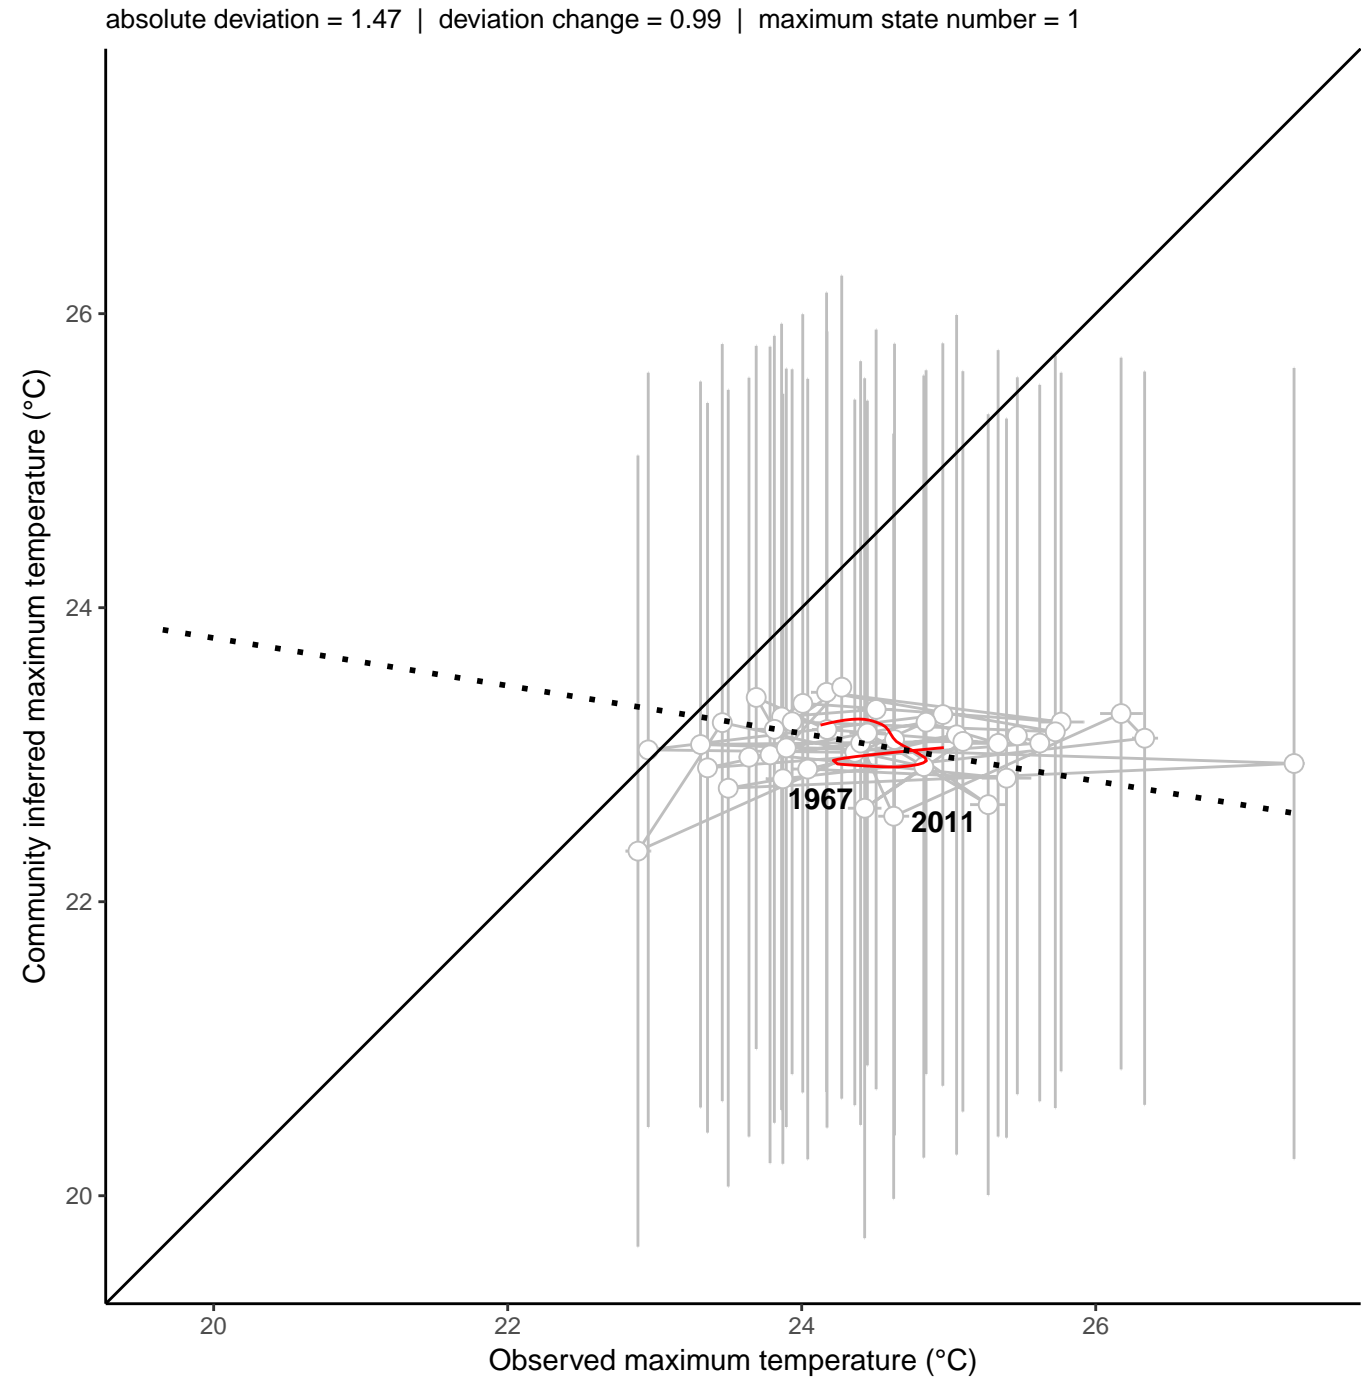

site : 840\_67\_17

absolute deviation = 3.94 | deviation change = 1.34 | maximum state number = 1

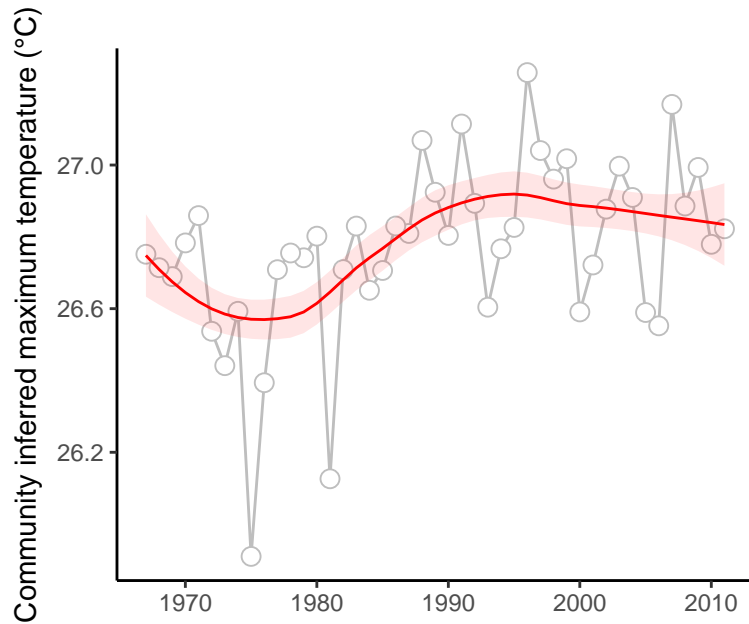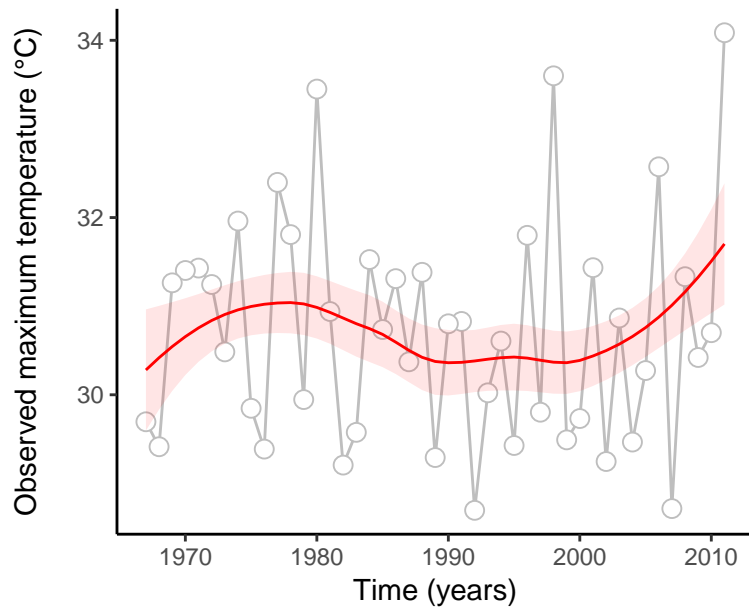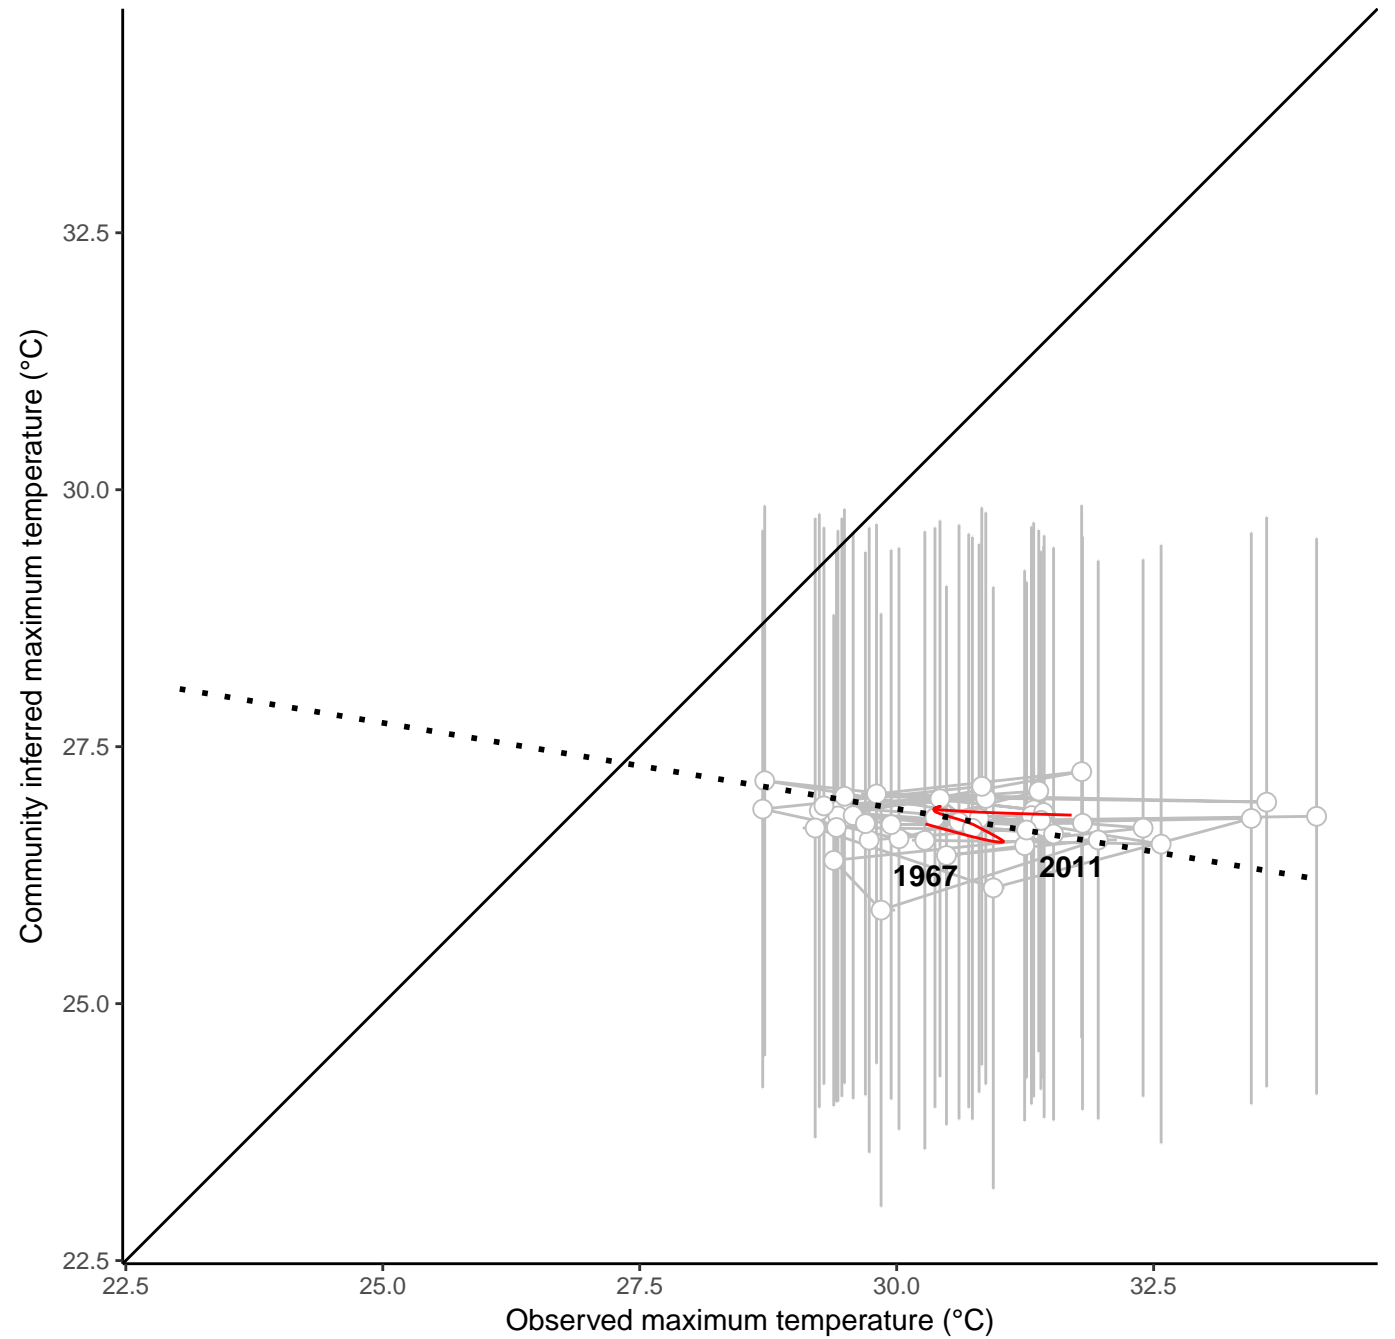

site : 840\_7\_15

absolute deviation = 3.57 | deviation change = 0.74 | maximum state number = 1

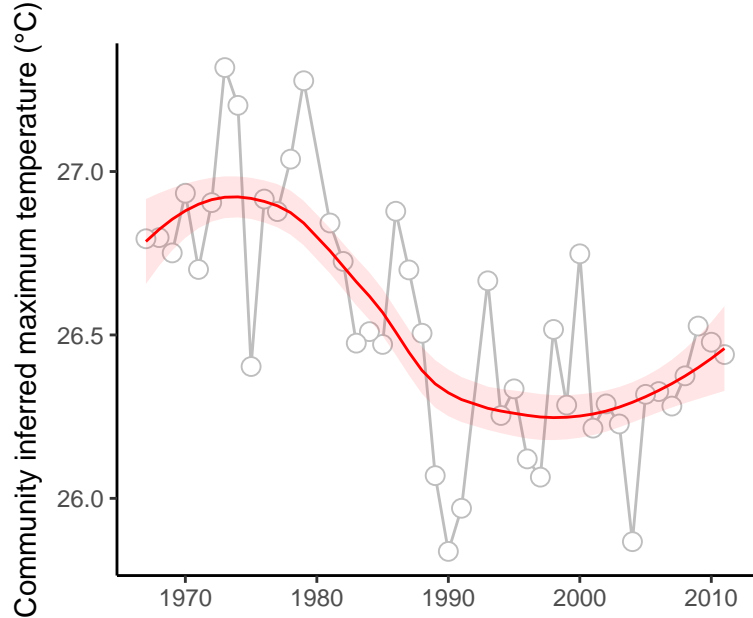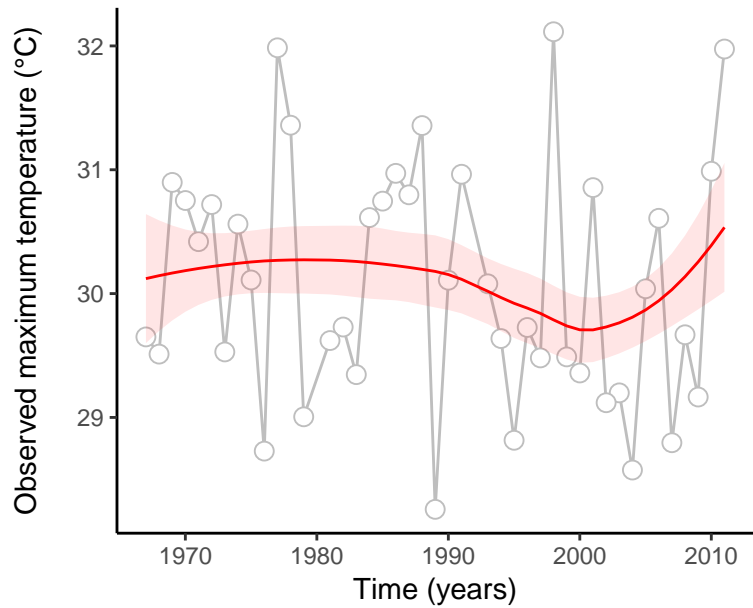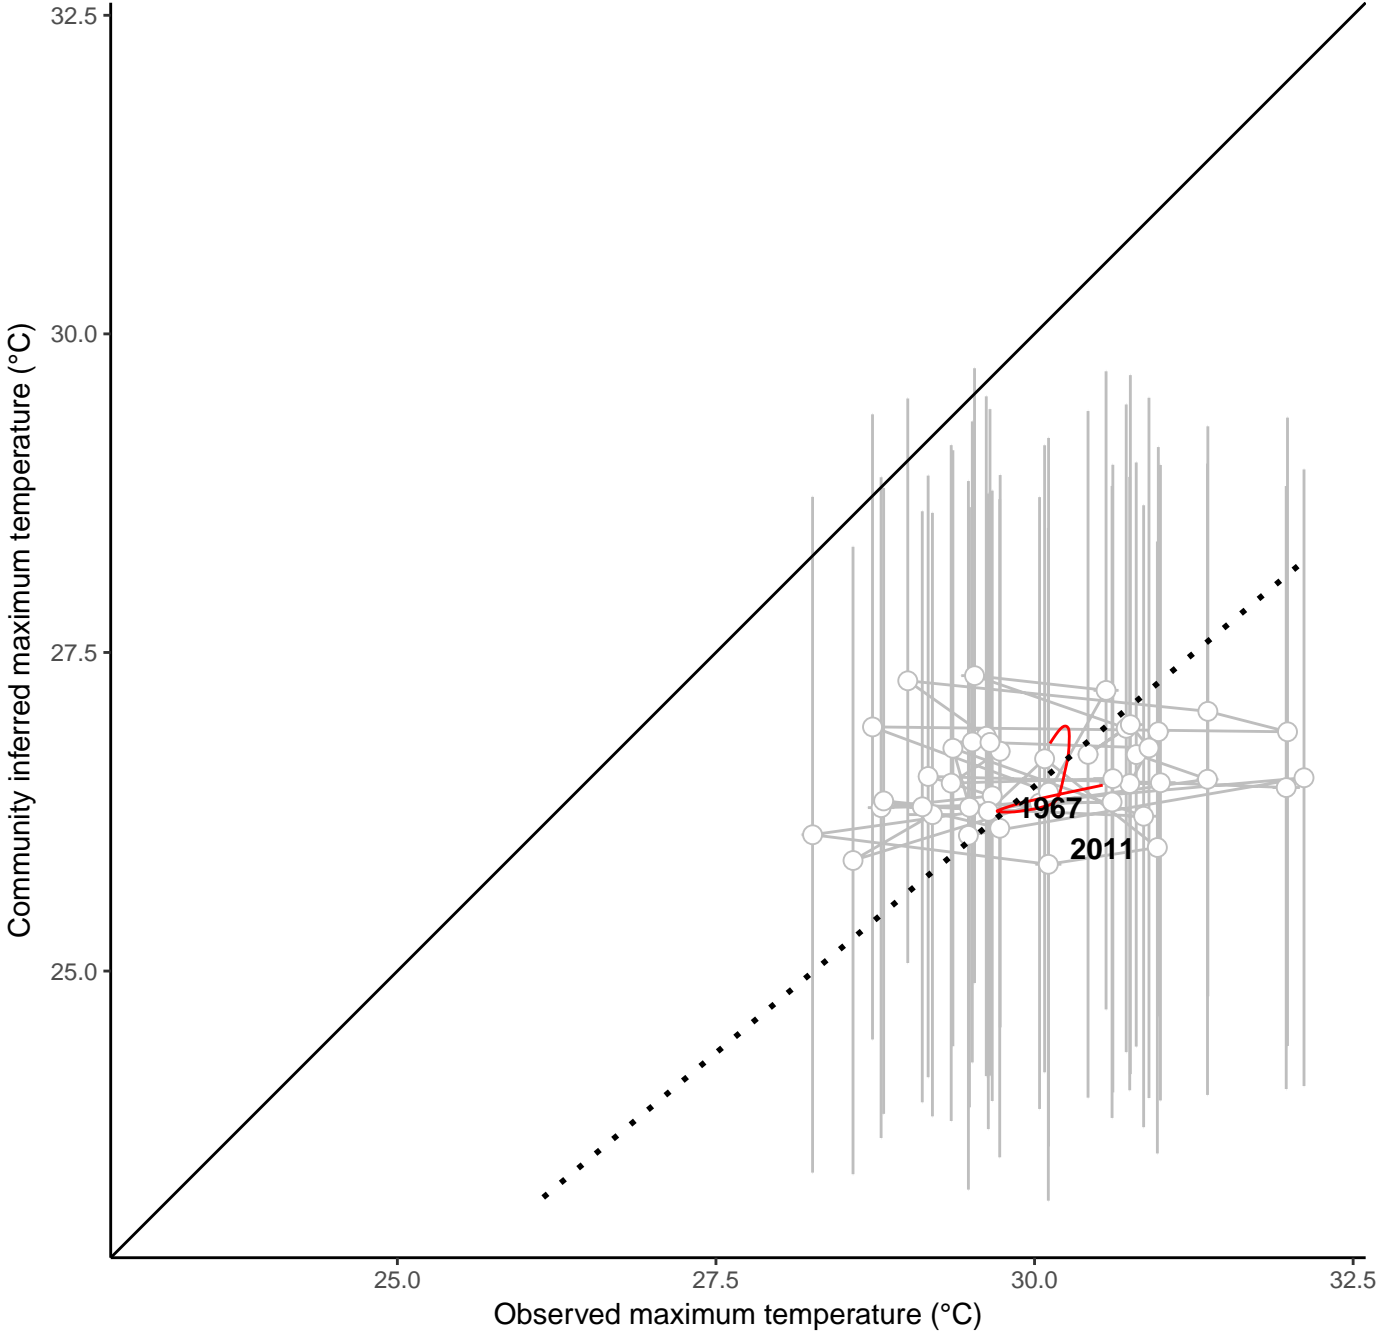

site : 840\_80\_6

absolute deviation = 4.21 | deviation change = 2.02 | maximum state number = 1

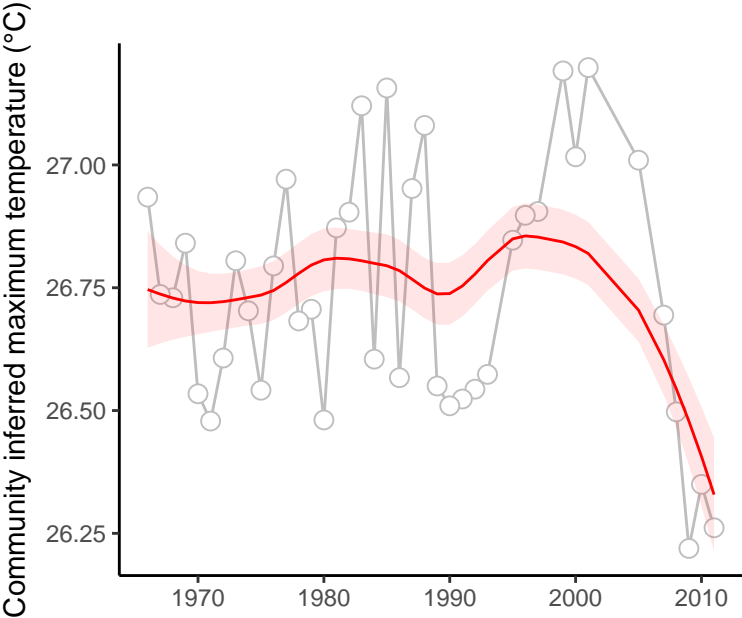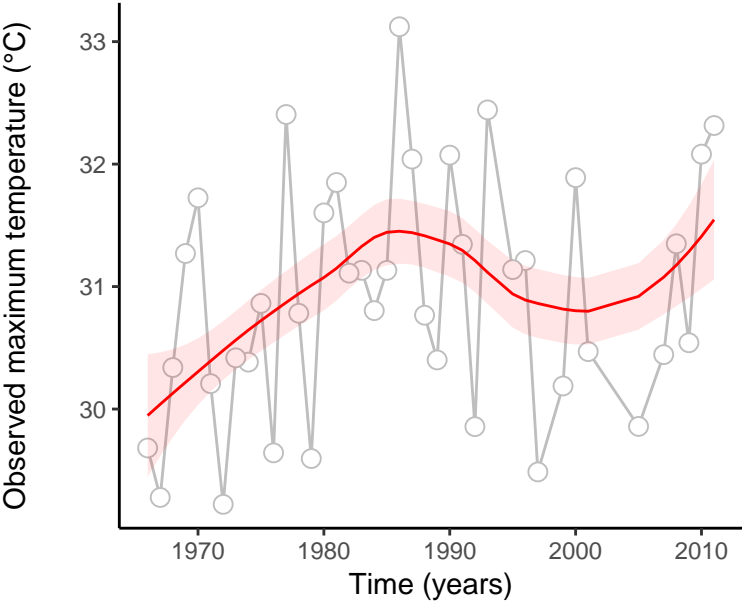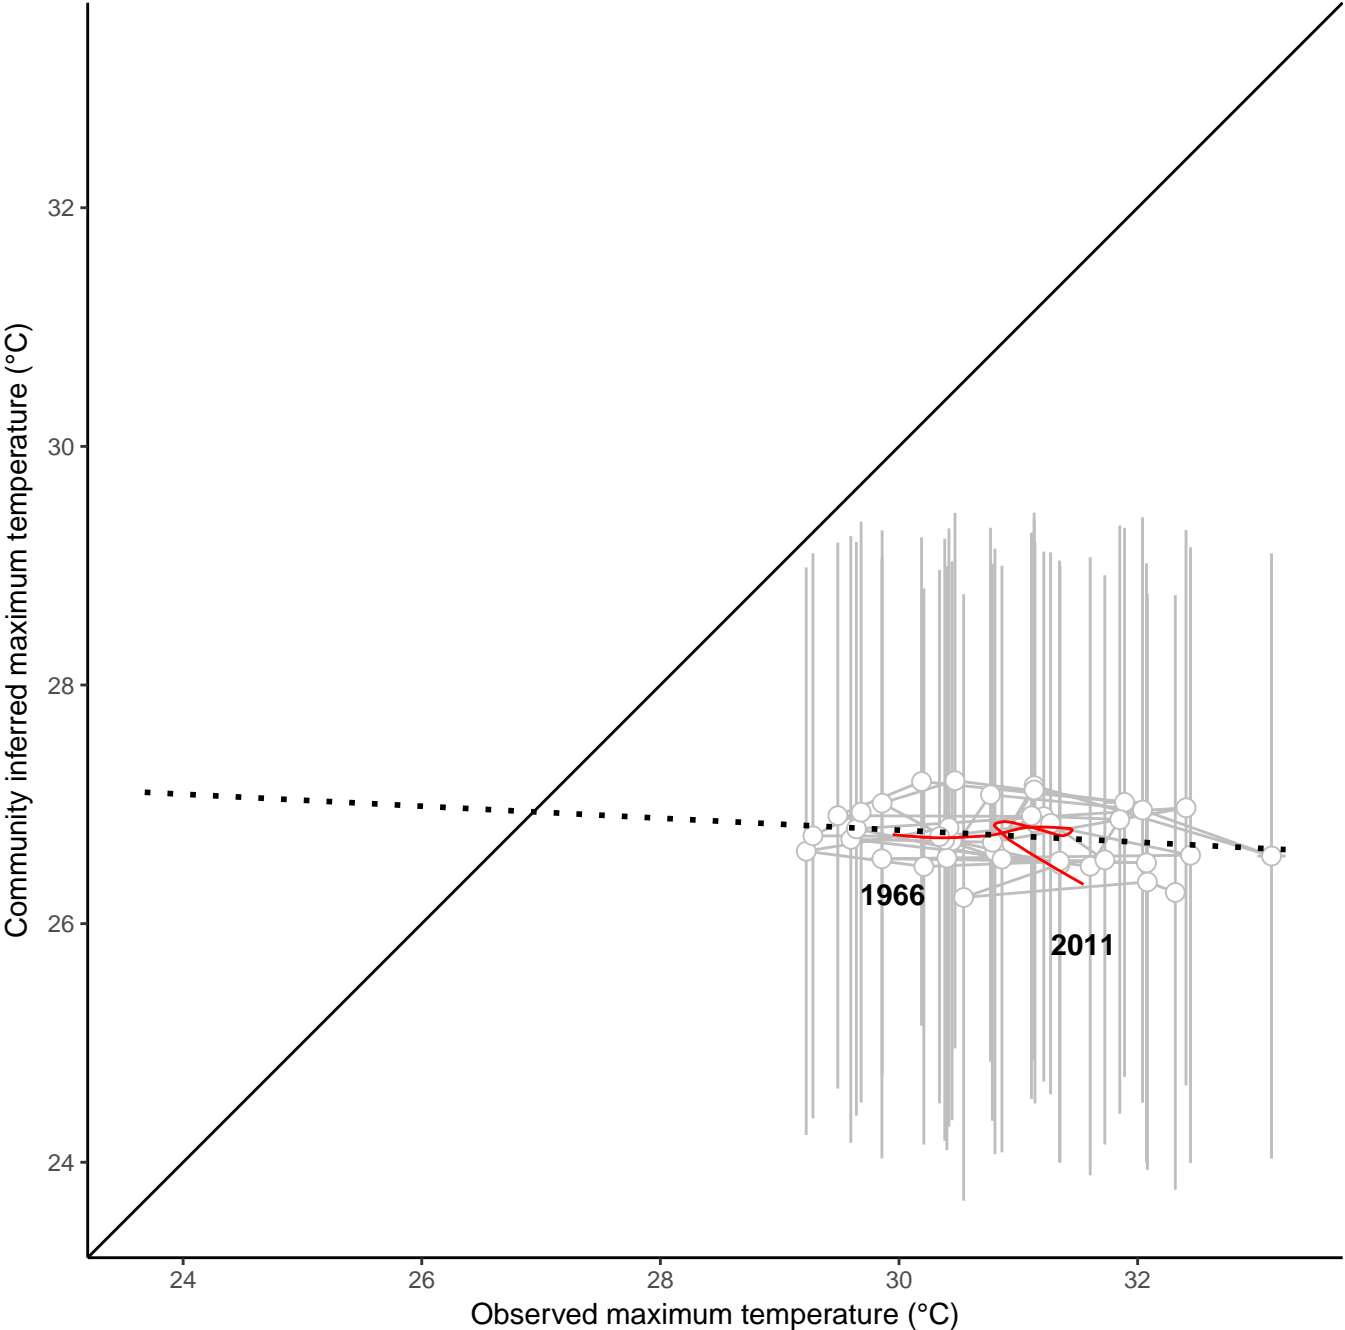

site : 840\_82\_33

absolute deviation = 3.34 | deviation change = 1.53 | maximum state number = 1

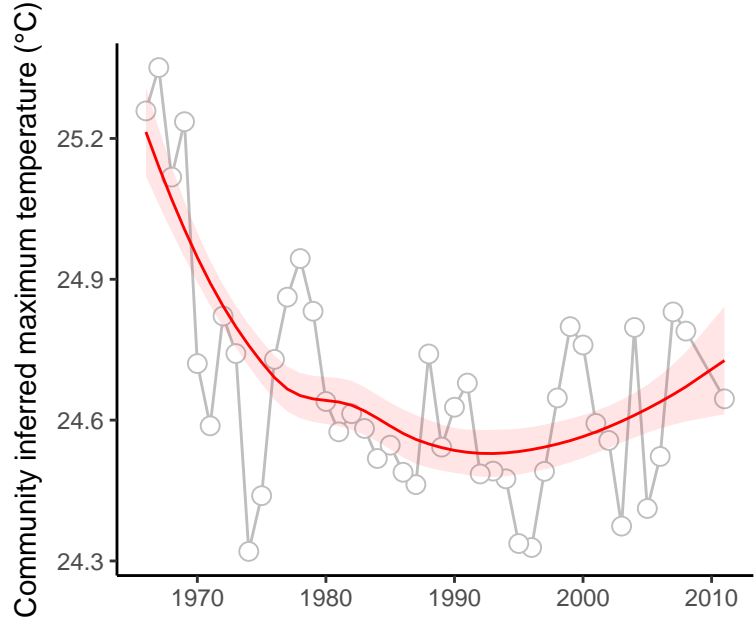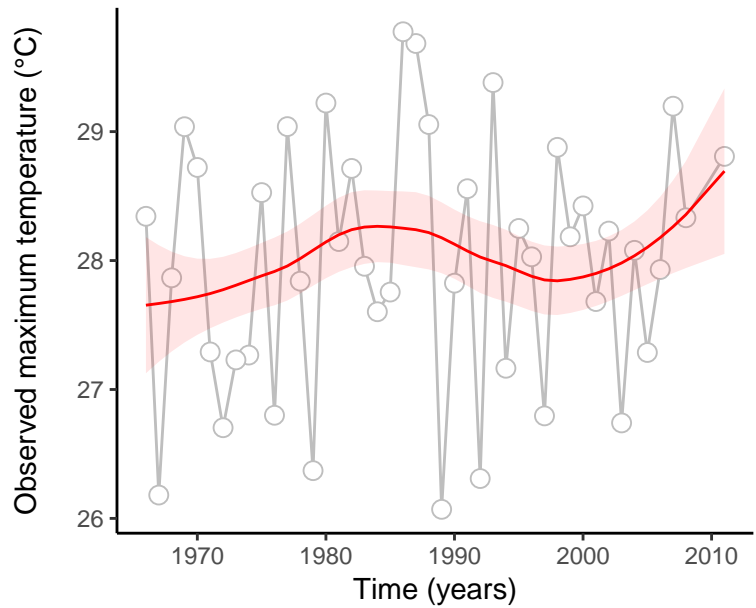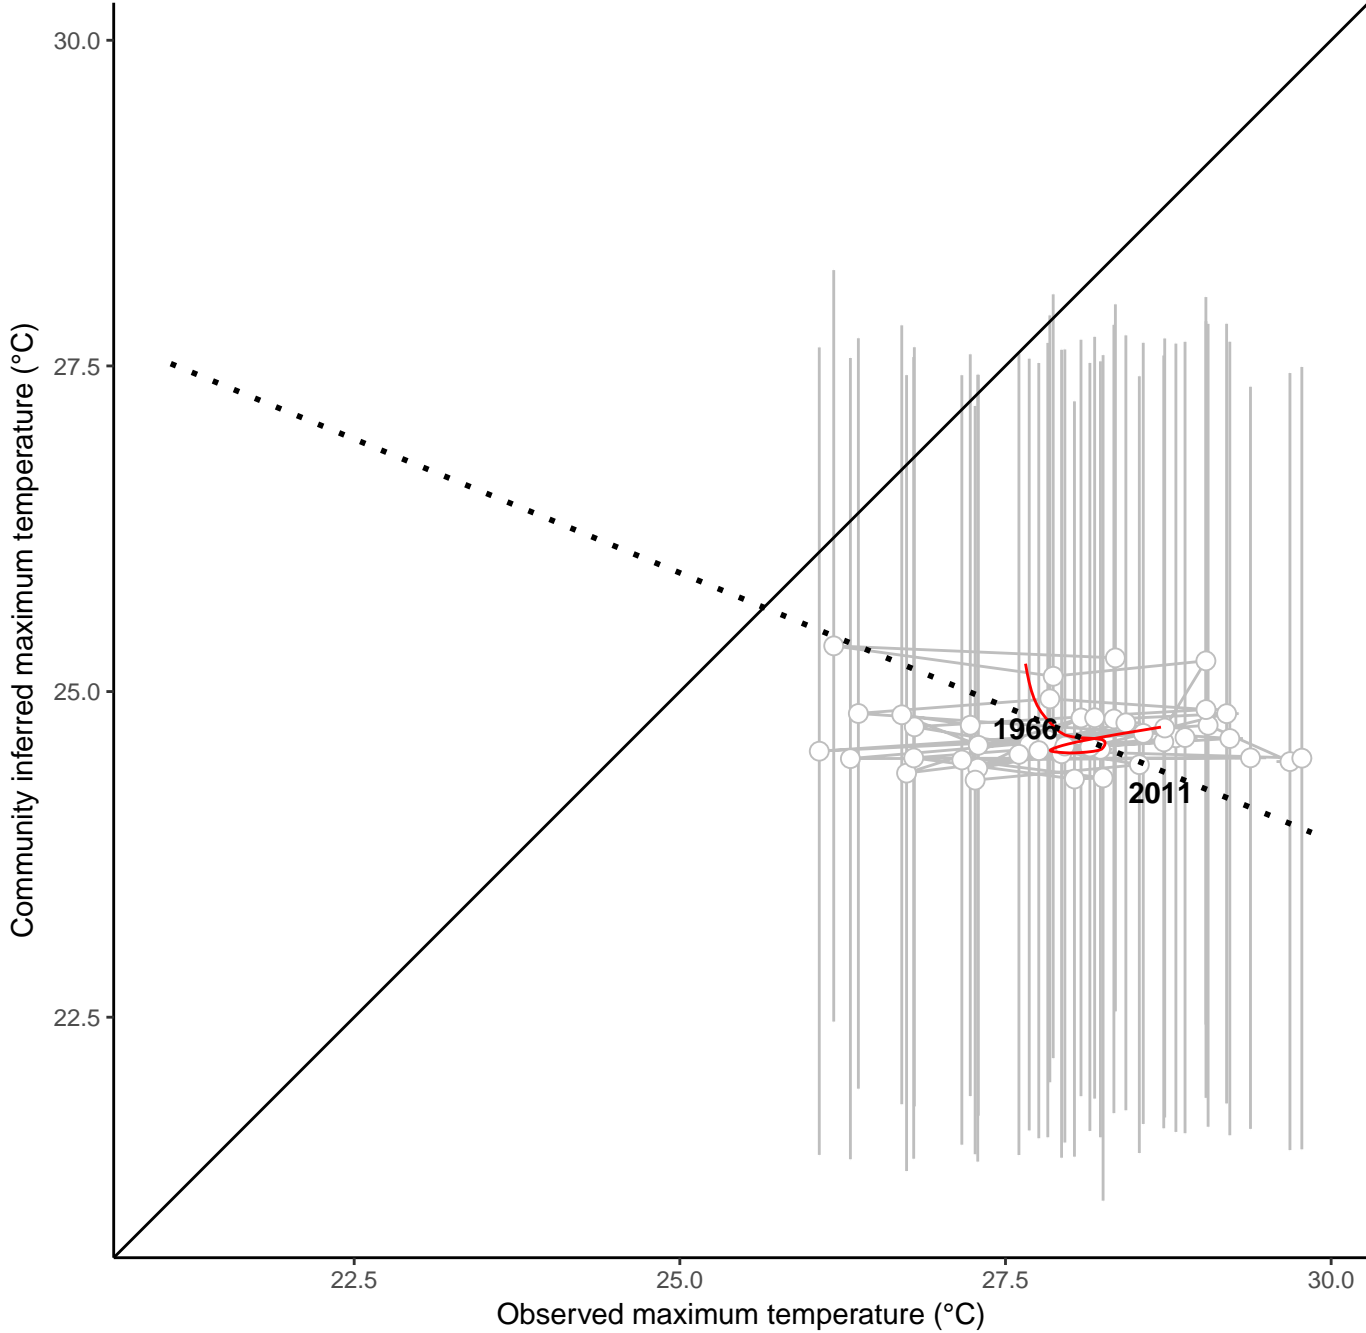

site : 840\_82\_5

absolute deviation = 4.16 | deviation change = 0.56 | maximum state number = 2

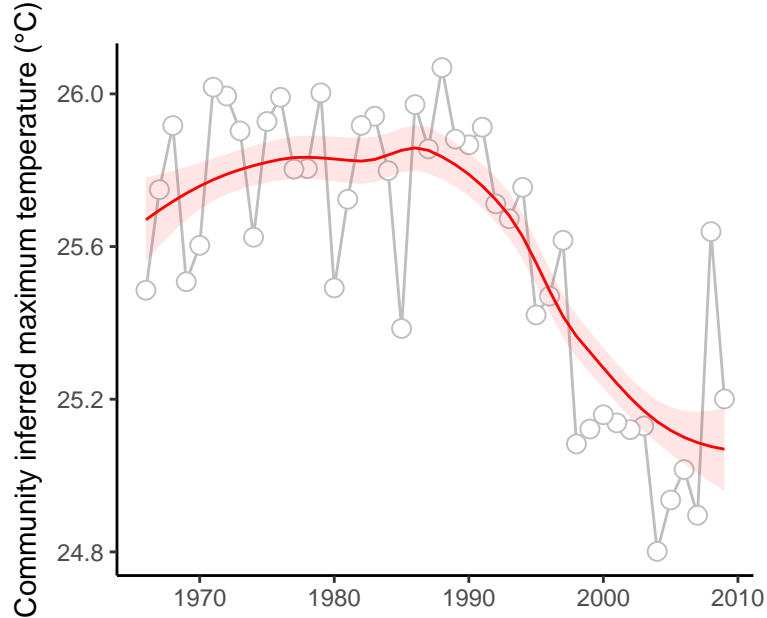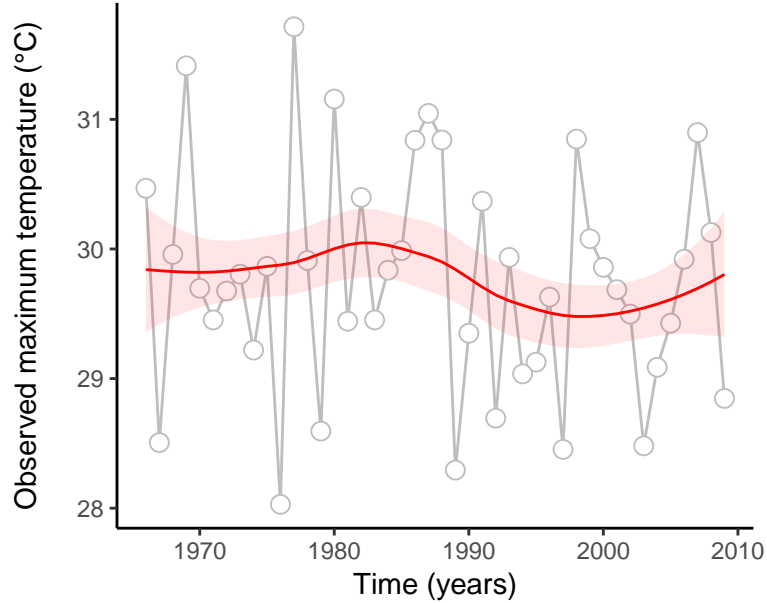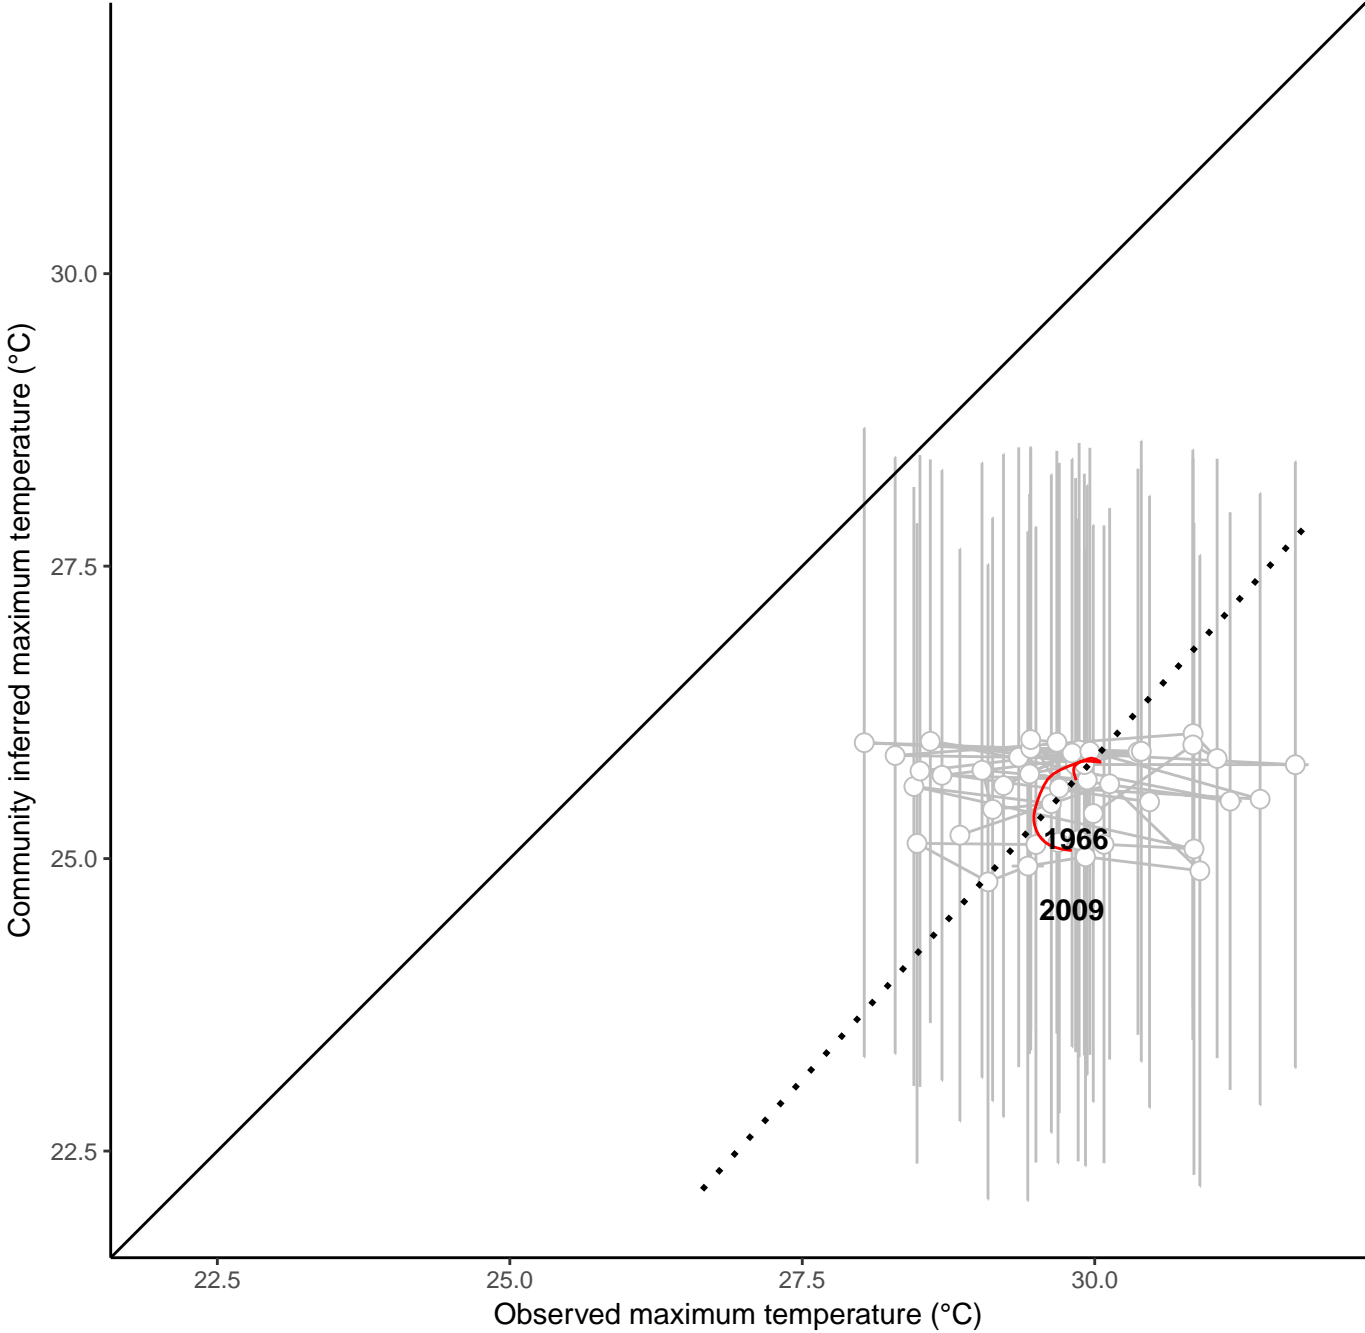

site : 840\_88\_5

absolute deviation = 2.83 | deviation change = 0.38 | maximum state number = 1

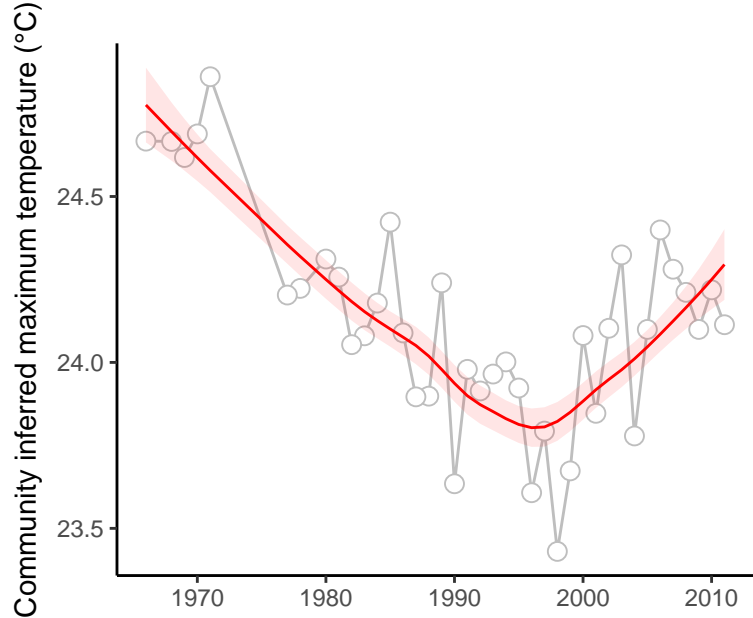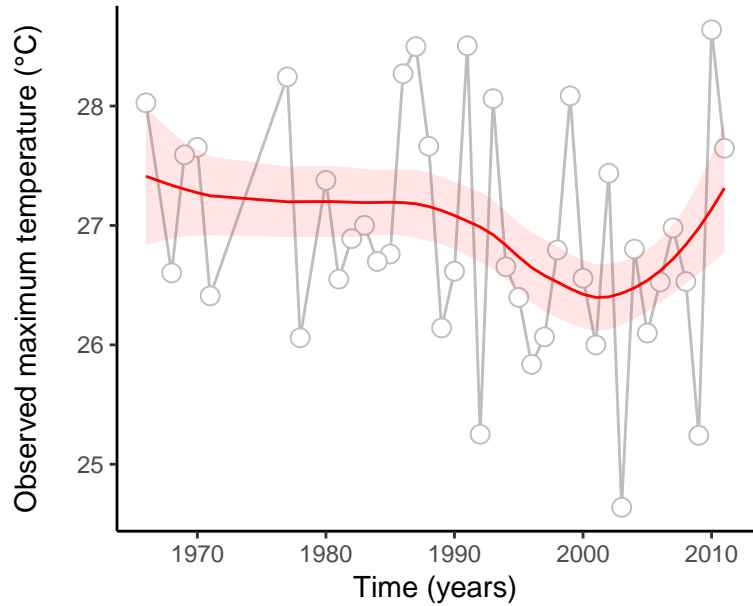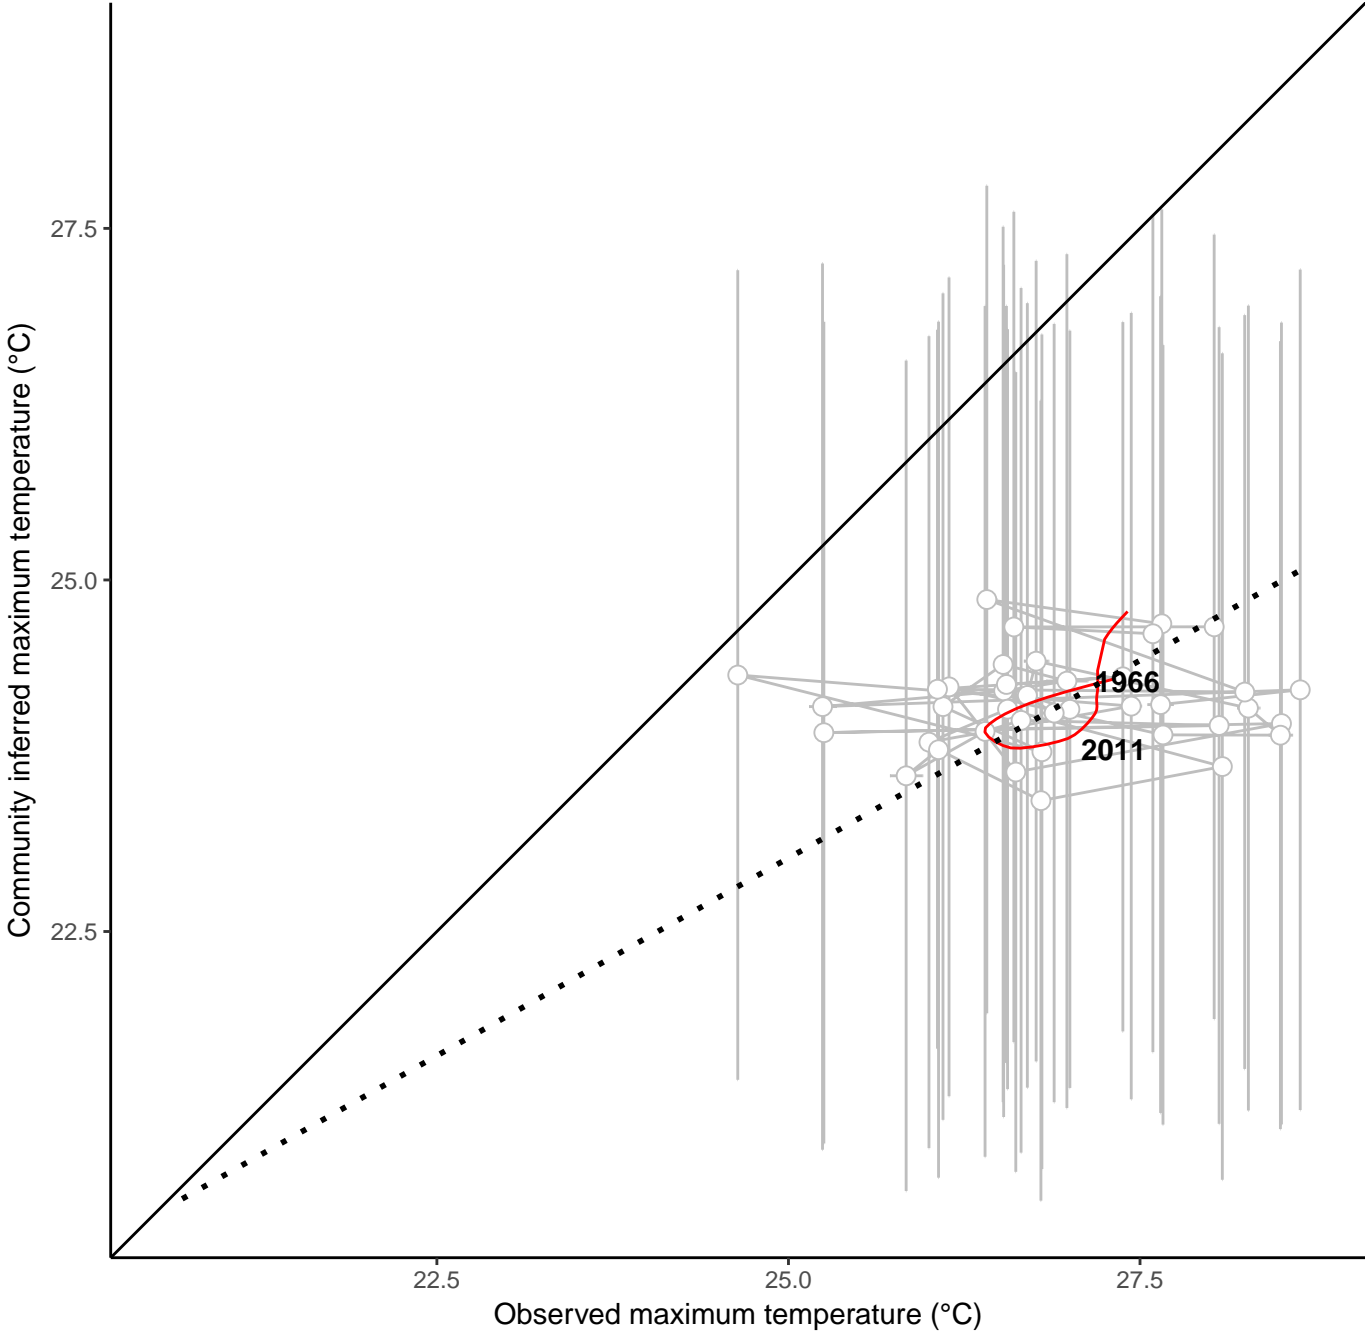

site : 840\_89\_19

absolute deviation = 2.93 | deviation change = 2.87 | maximum state number = 1

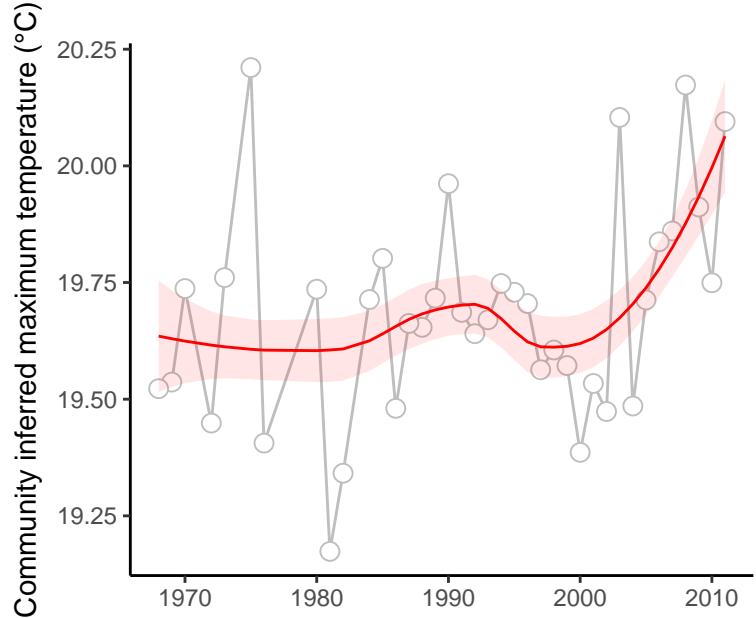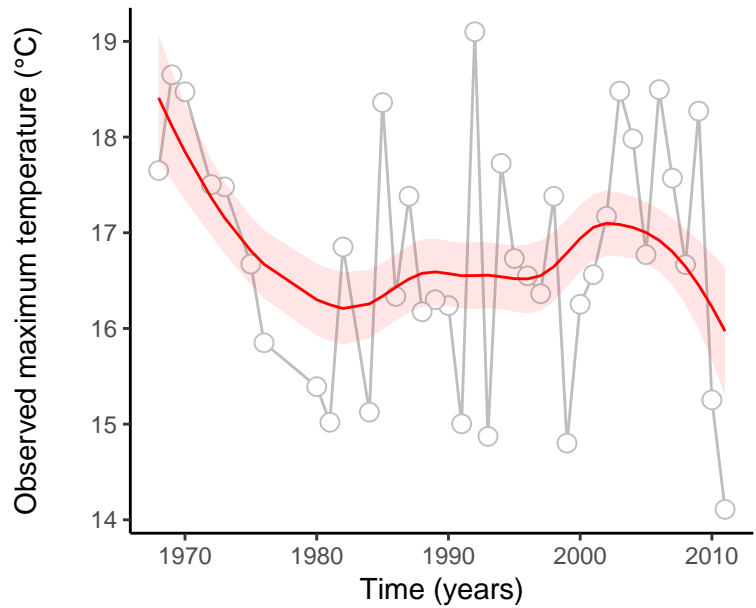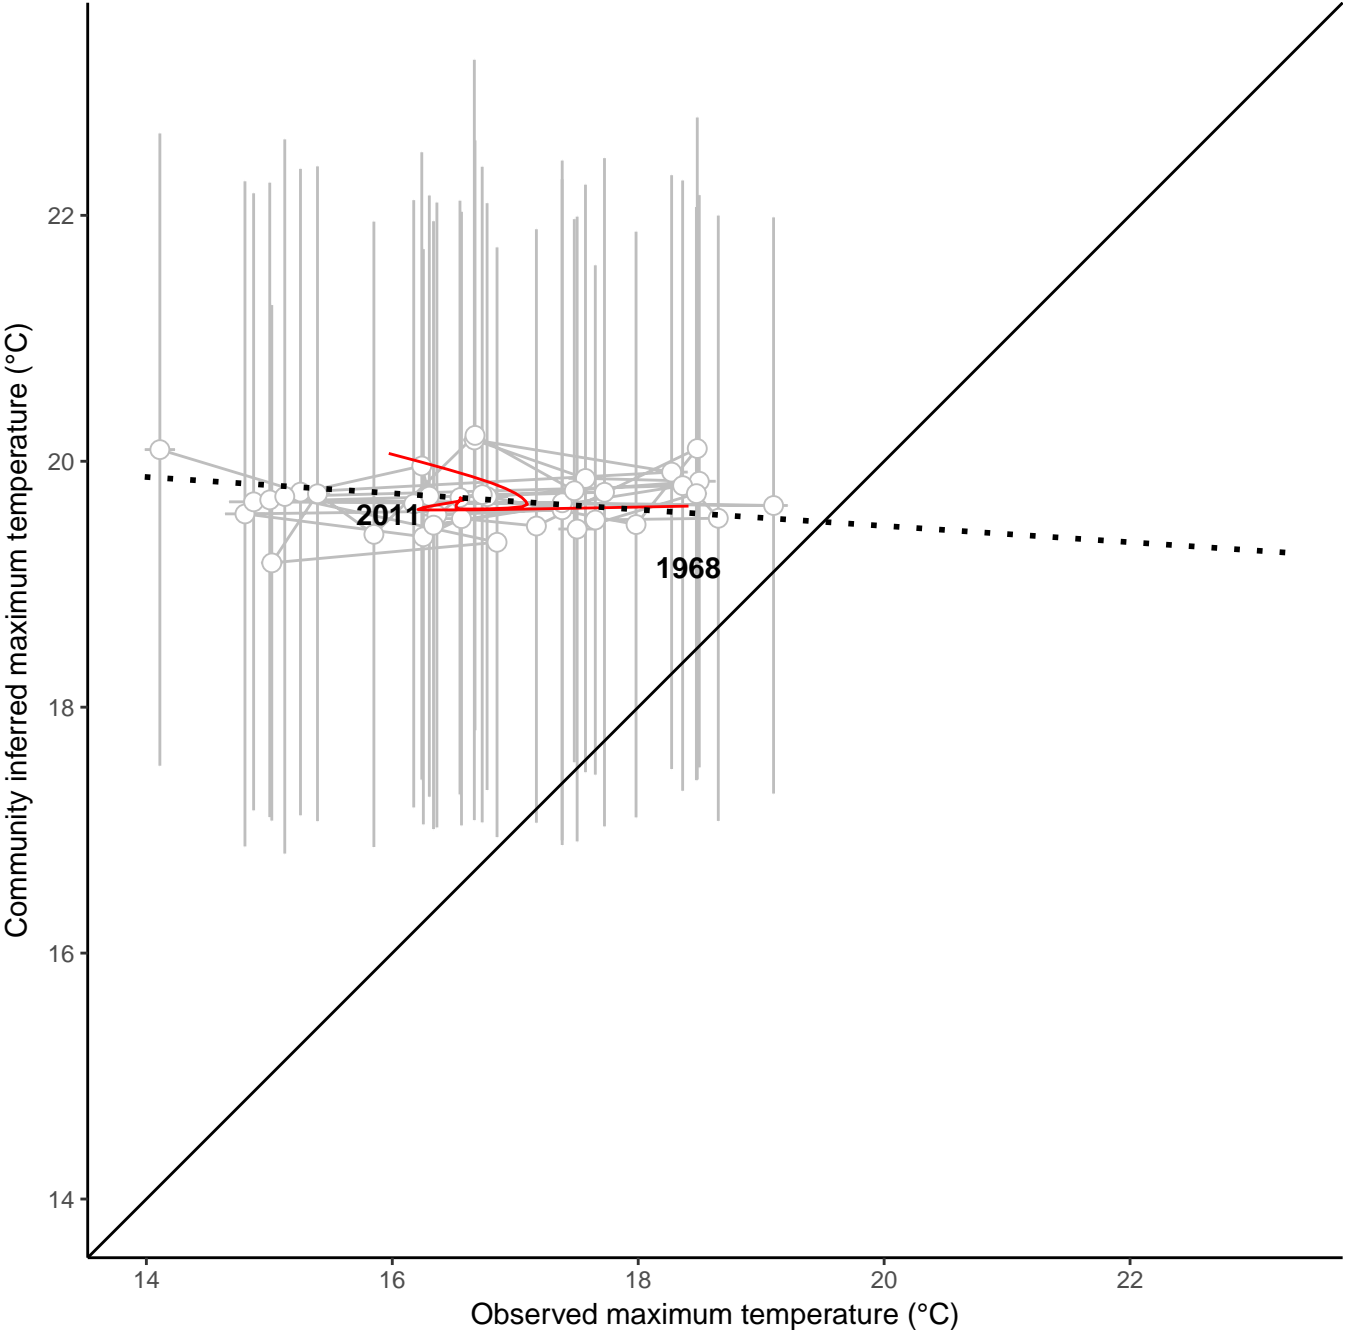



site : 840\_14\_47

absolute deviation = 4.34 | deviation change = -0.06 | maximum state number = 2

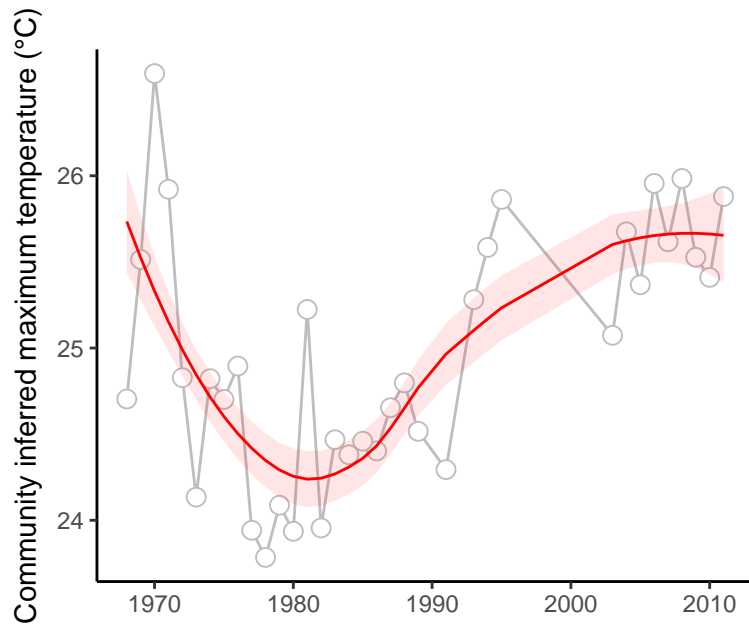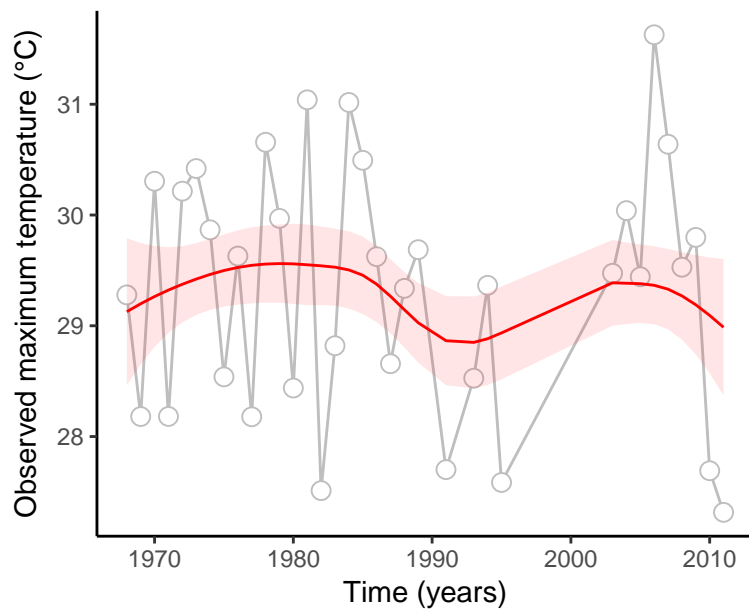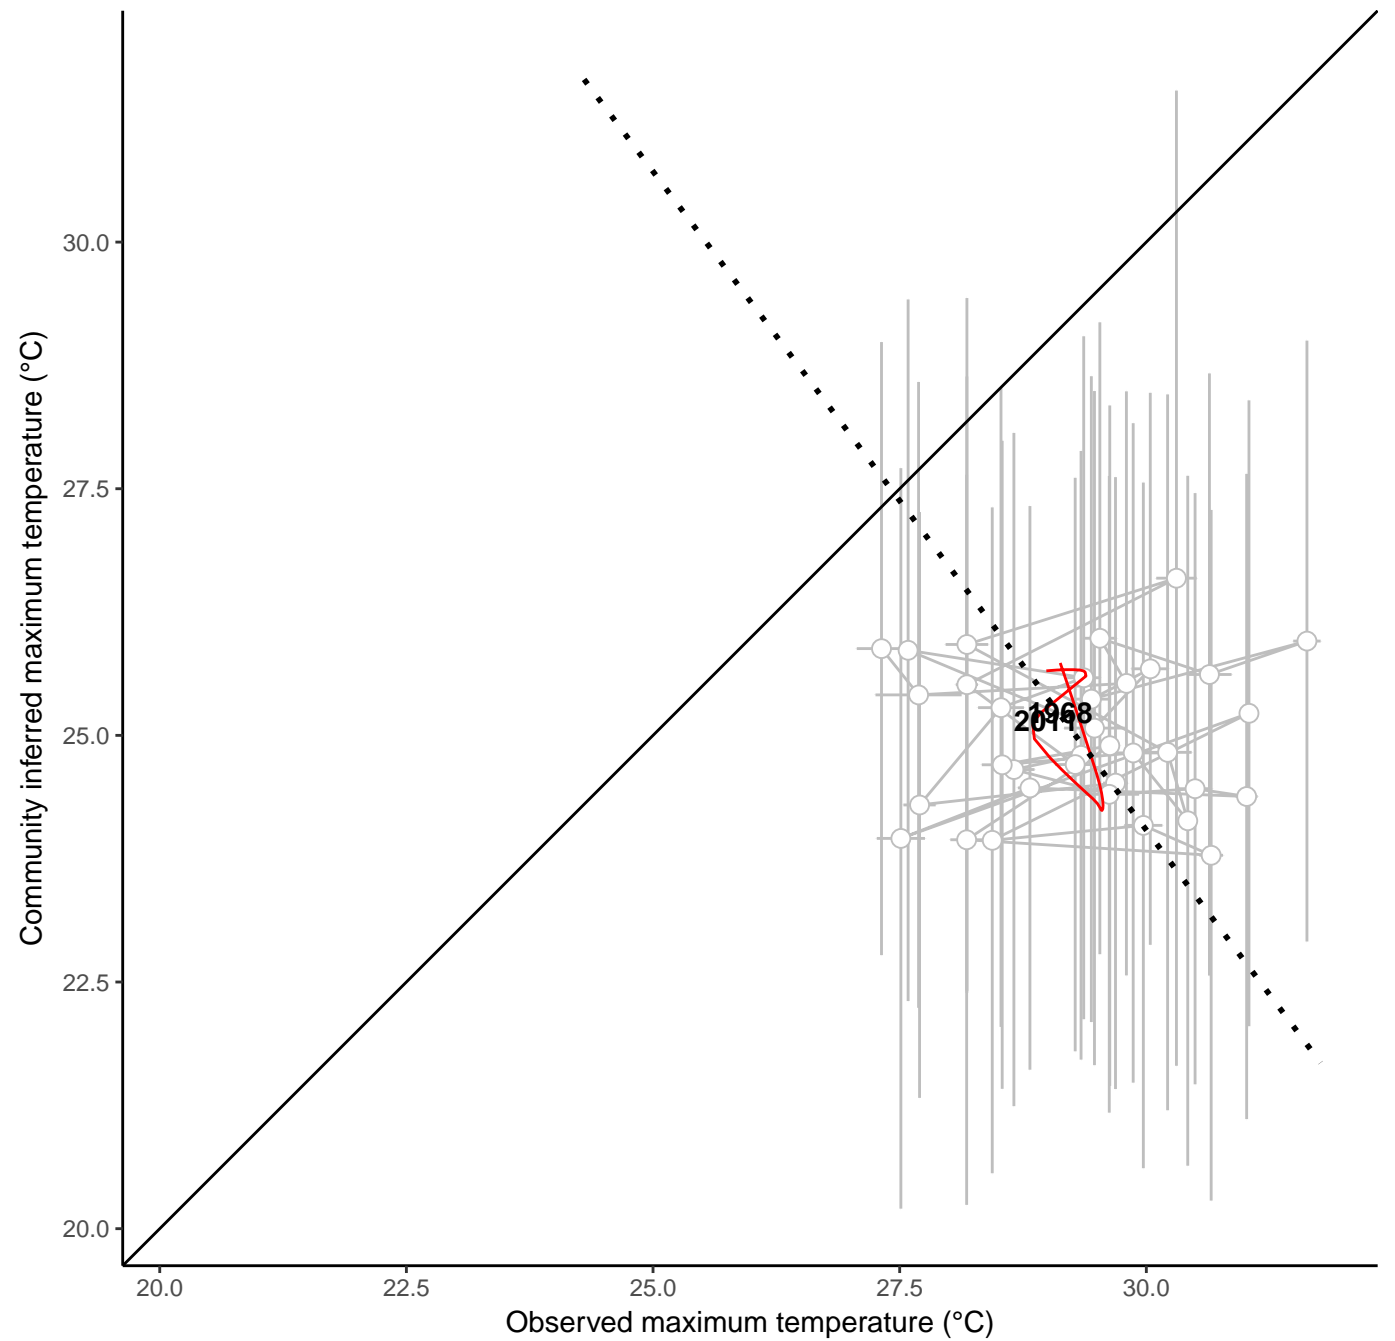

site : 840\_25\_20

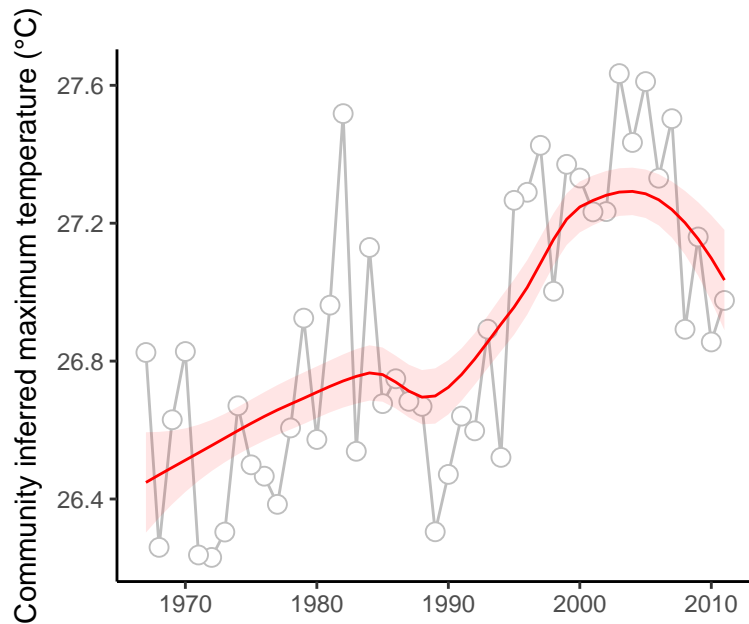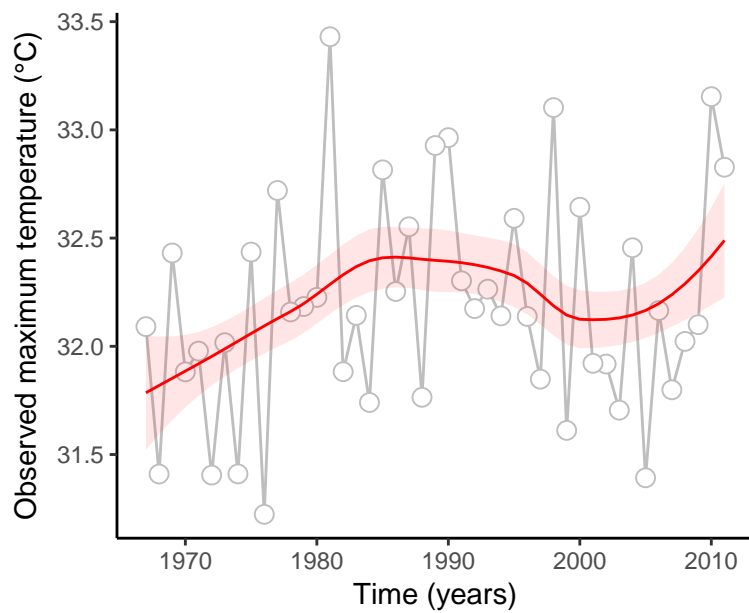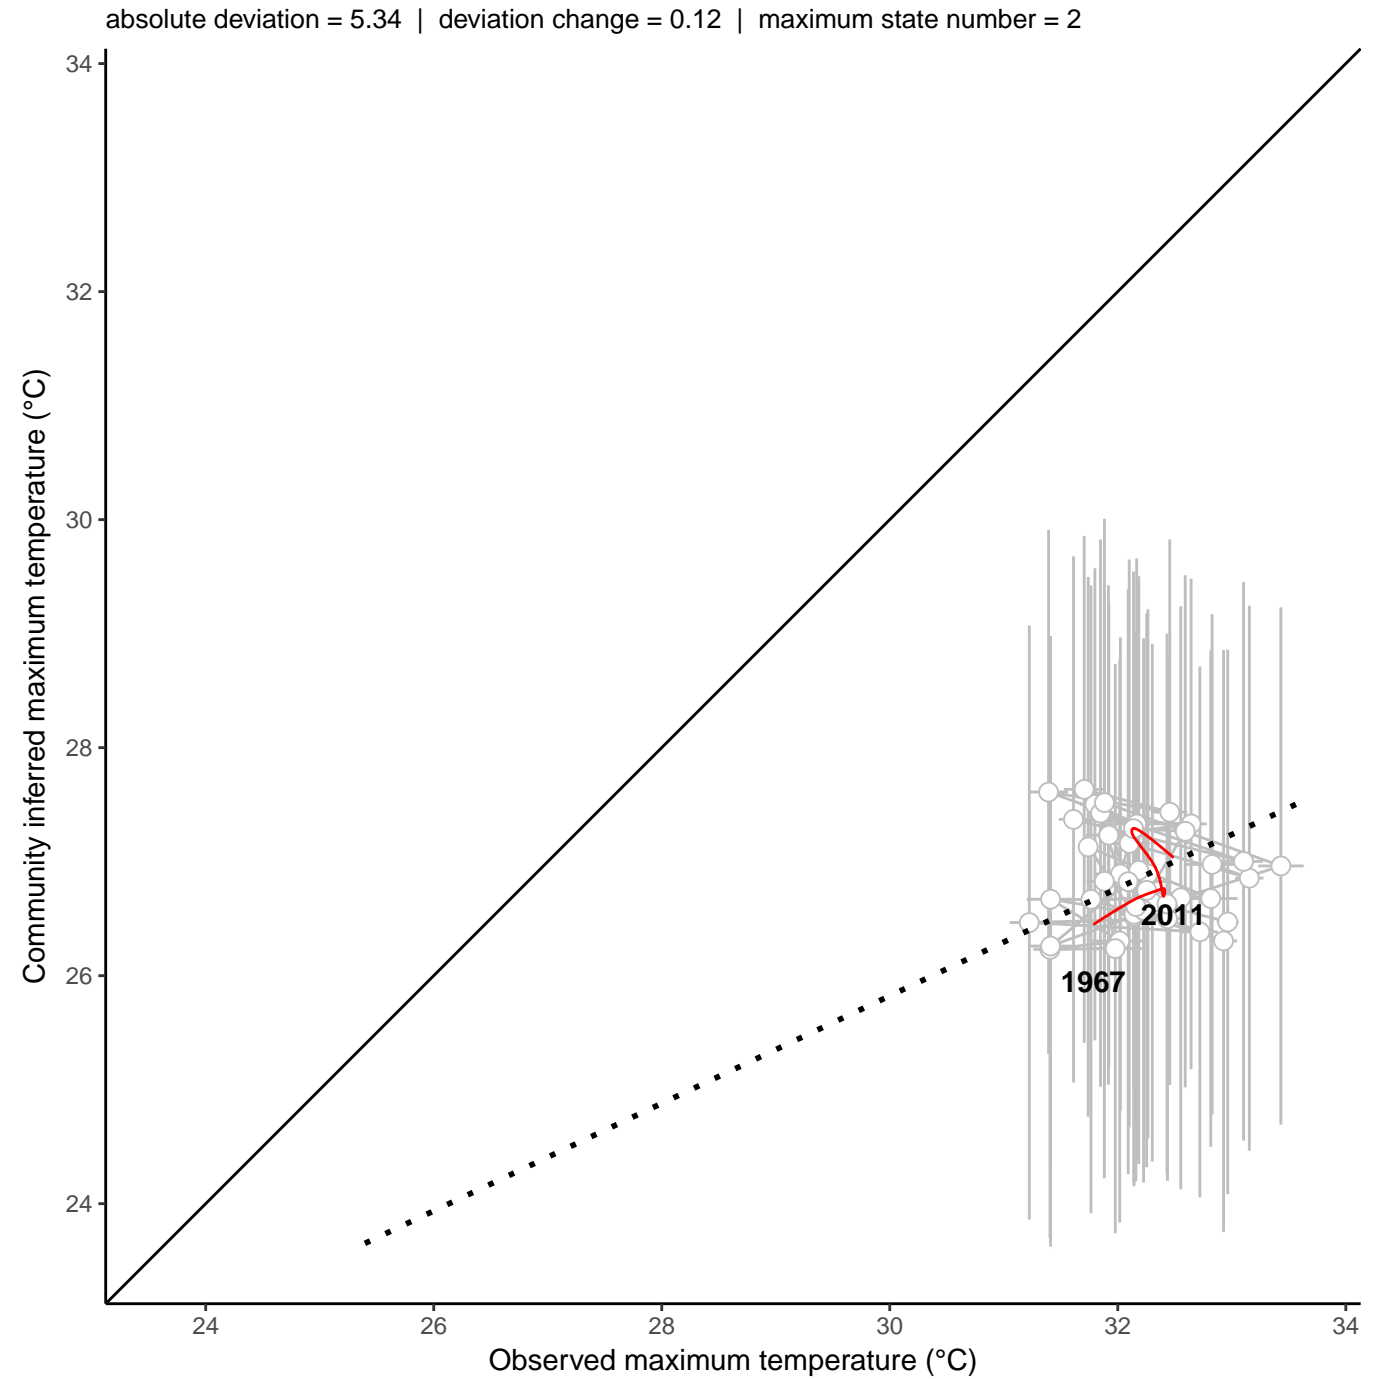

site : 840\_33\_15

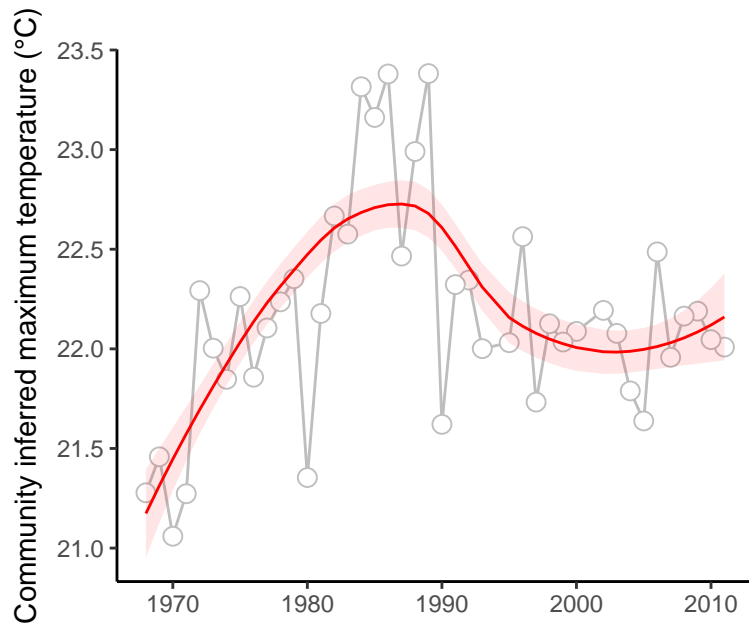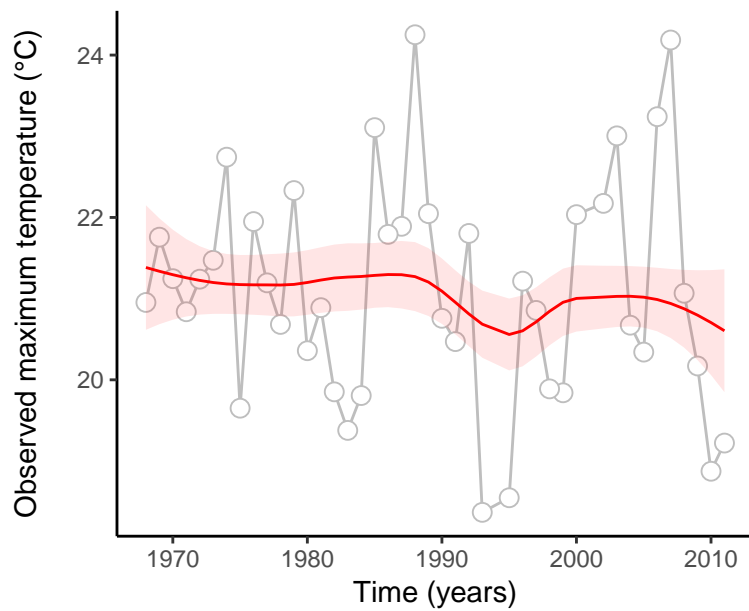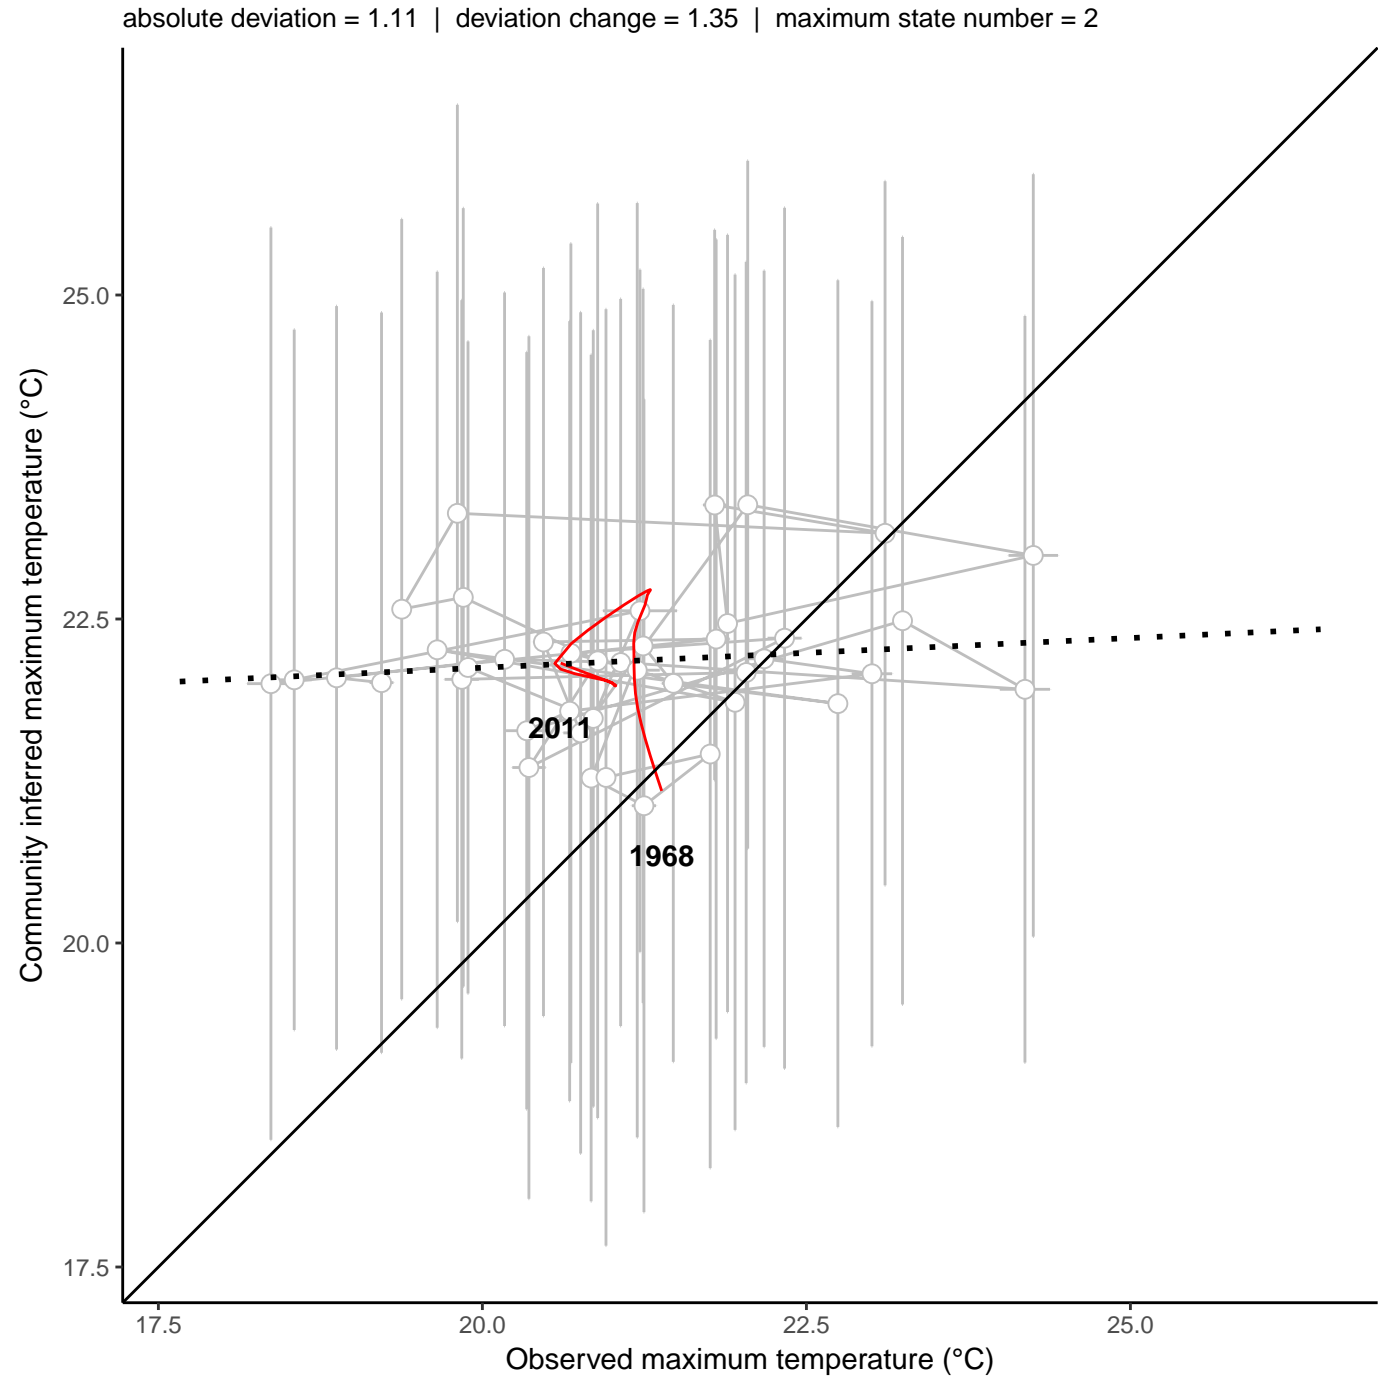

site : 840\_42\_16

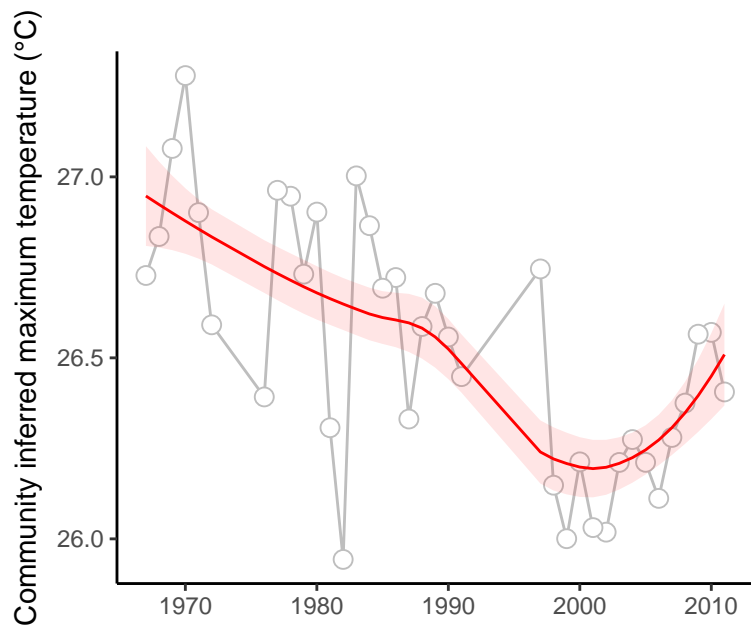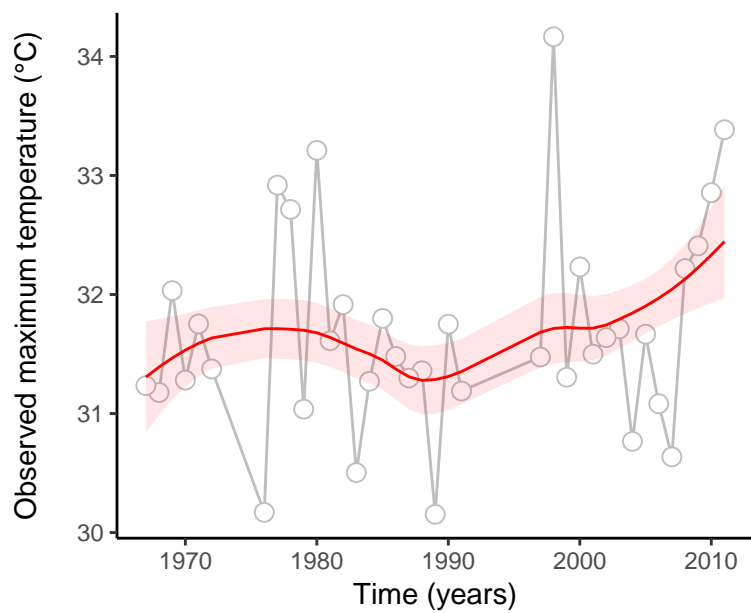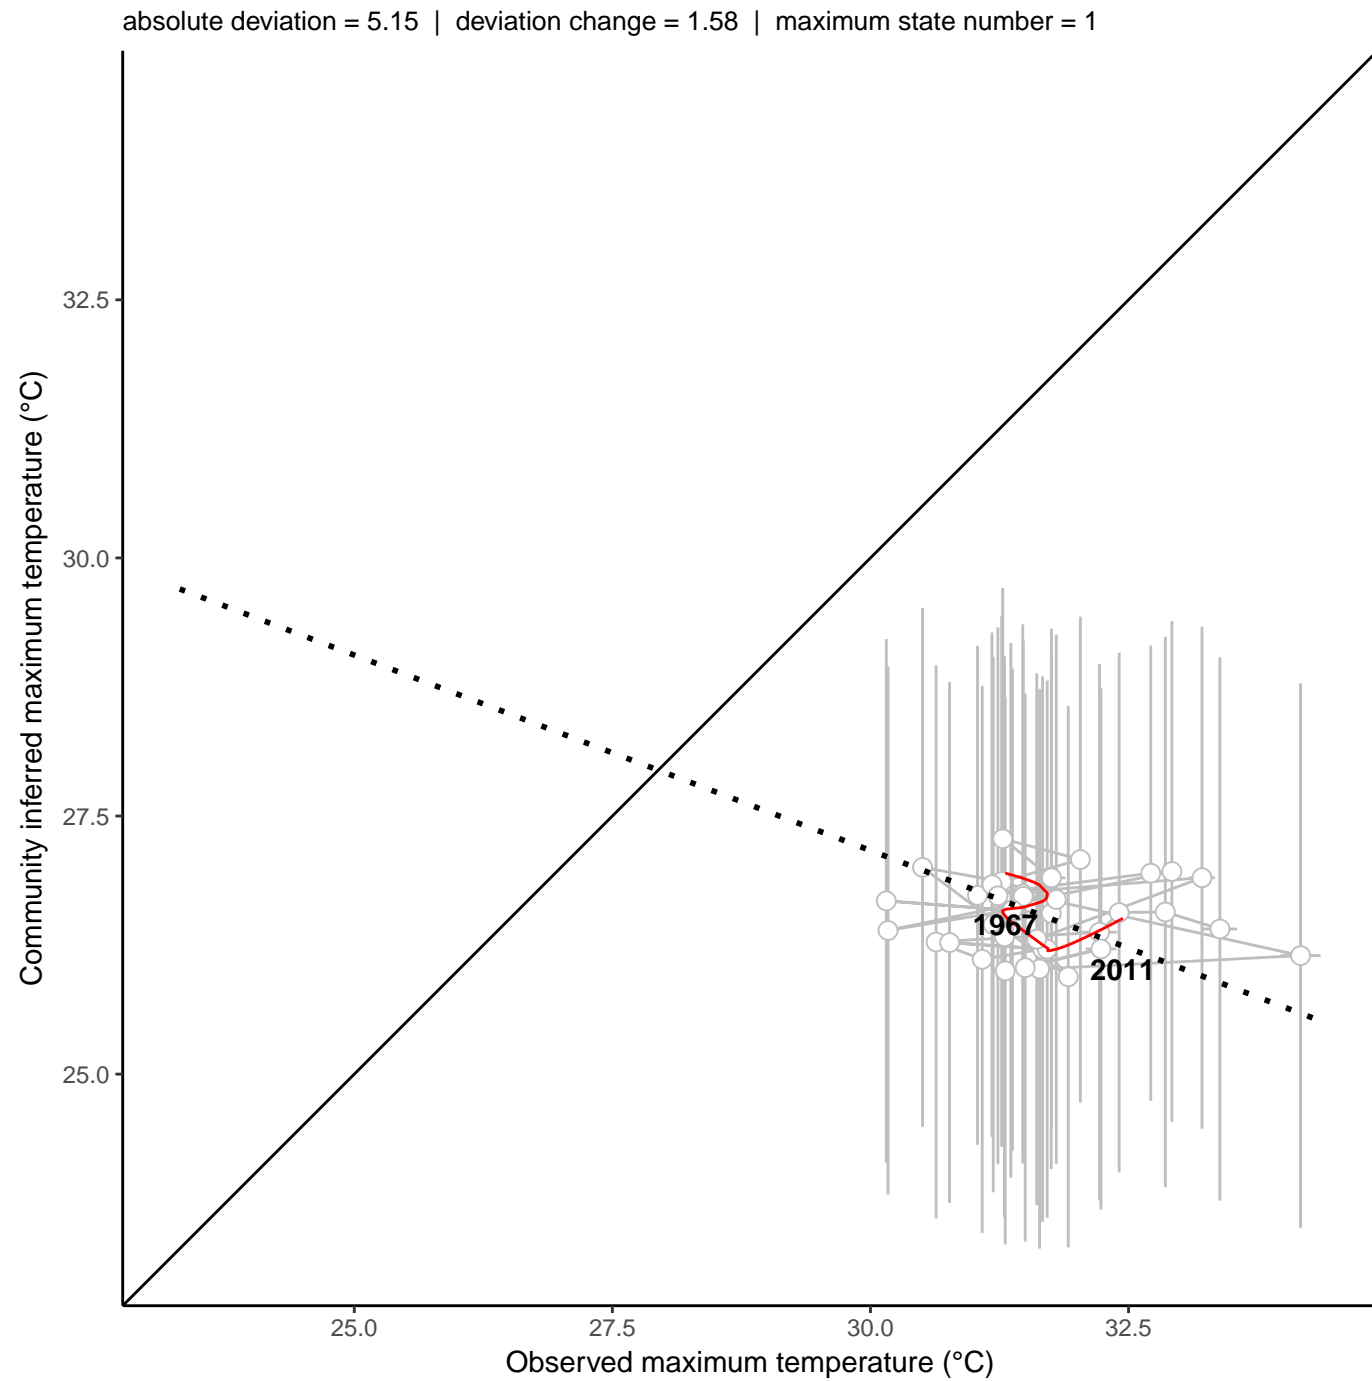

site : 840\_46\_28

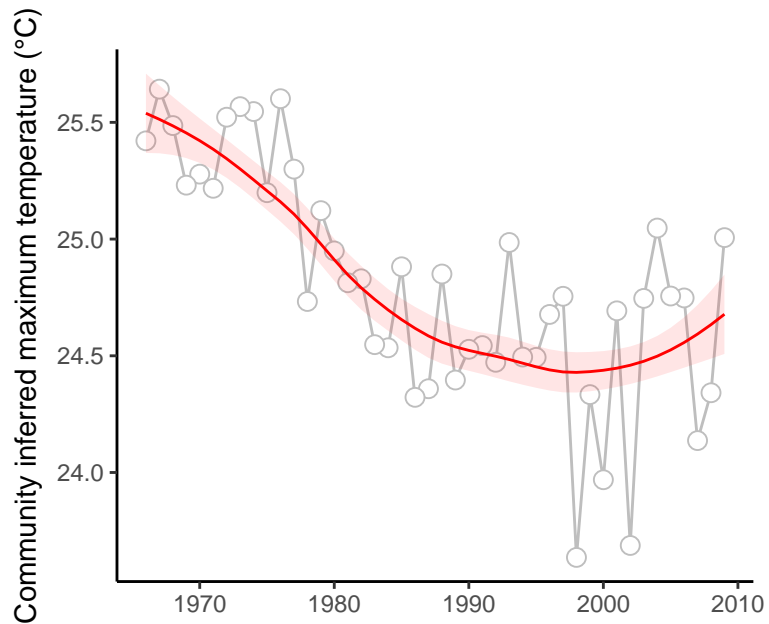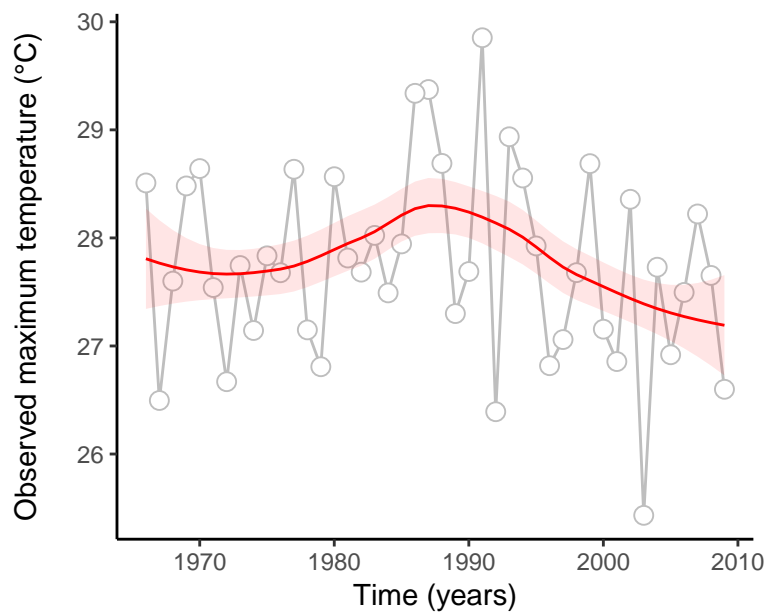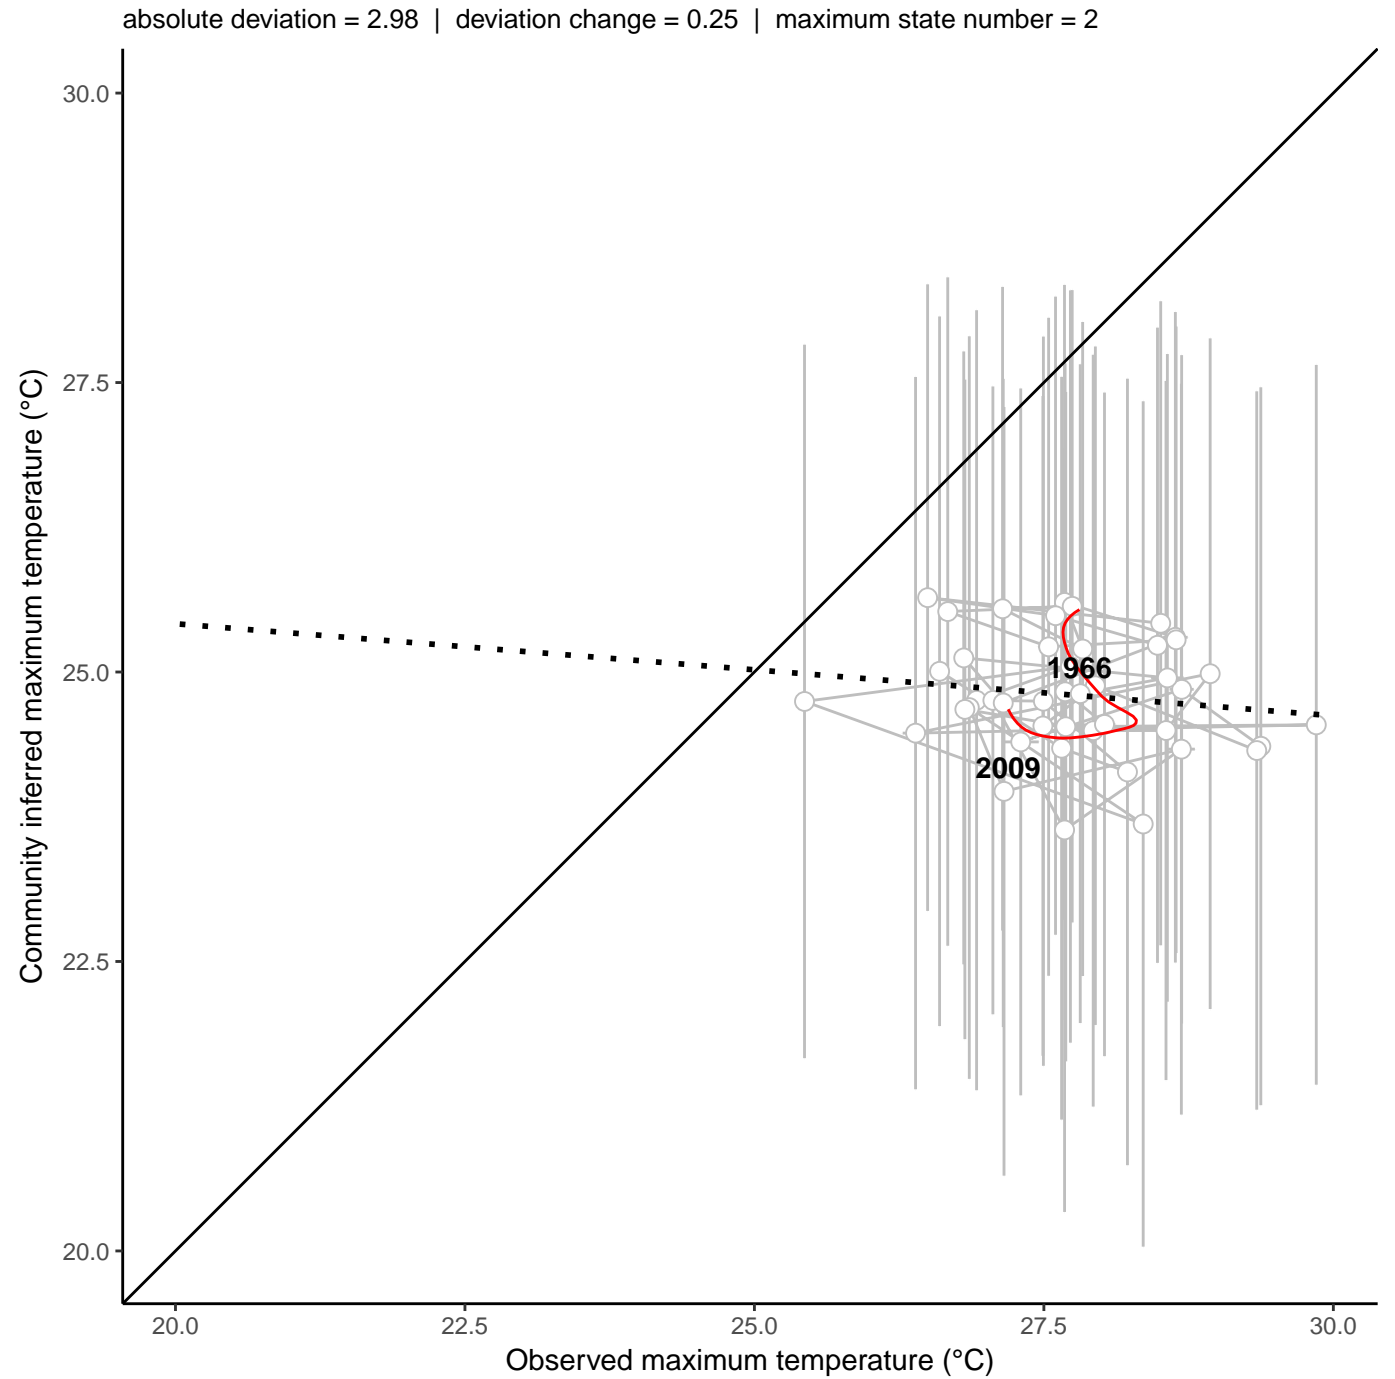

site : 840\_46\_32

absolute deviation = 2.55 | deviation change = 0.62 | maximum state number = 1

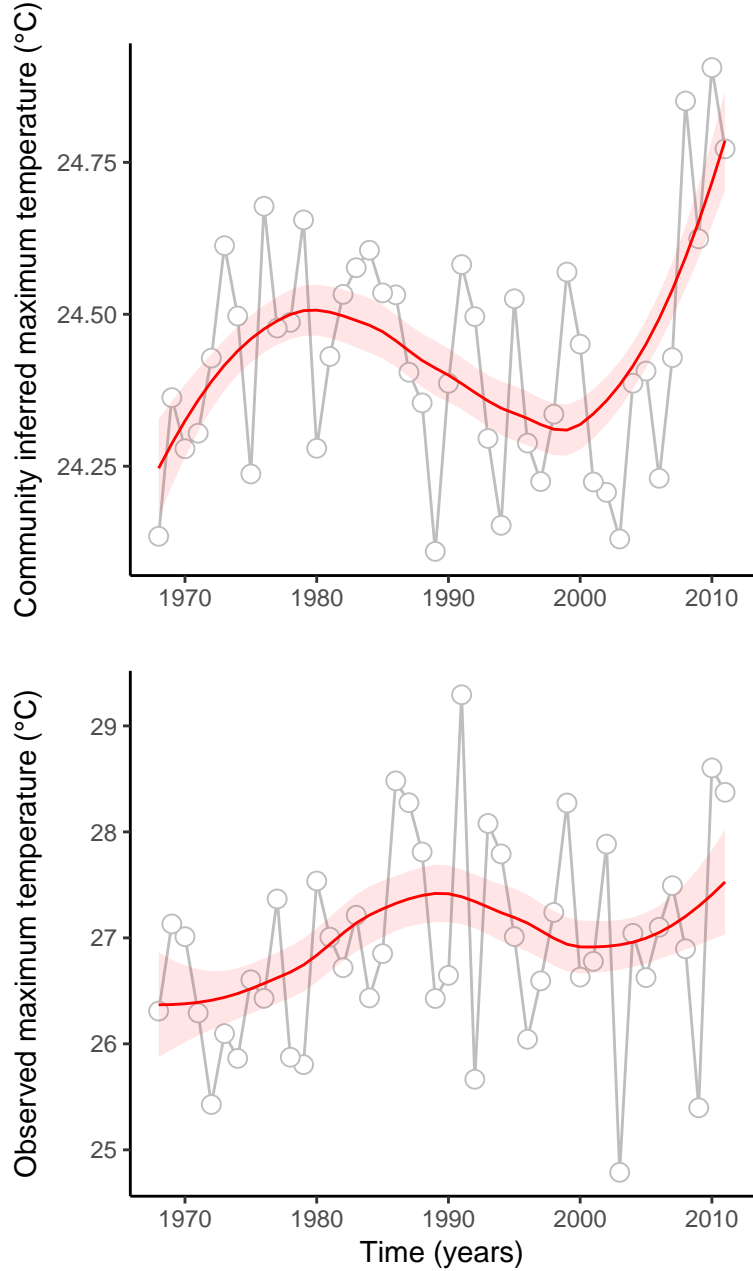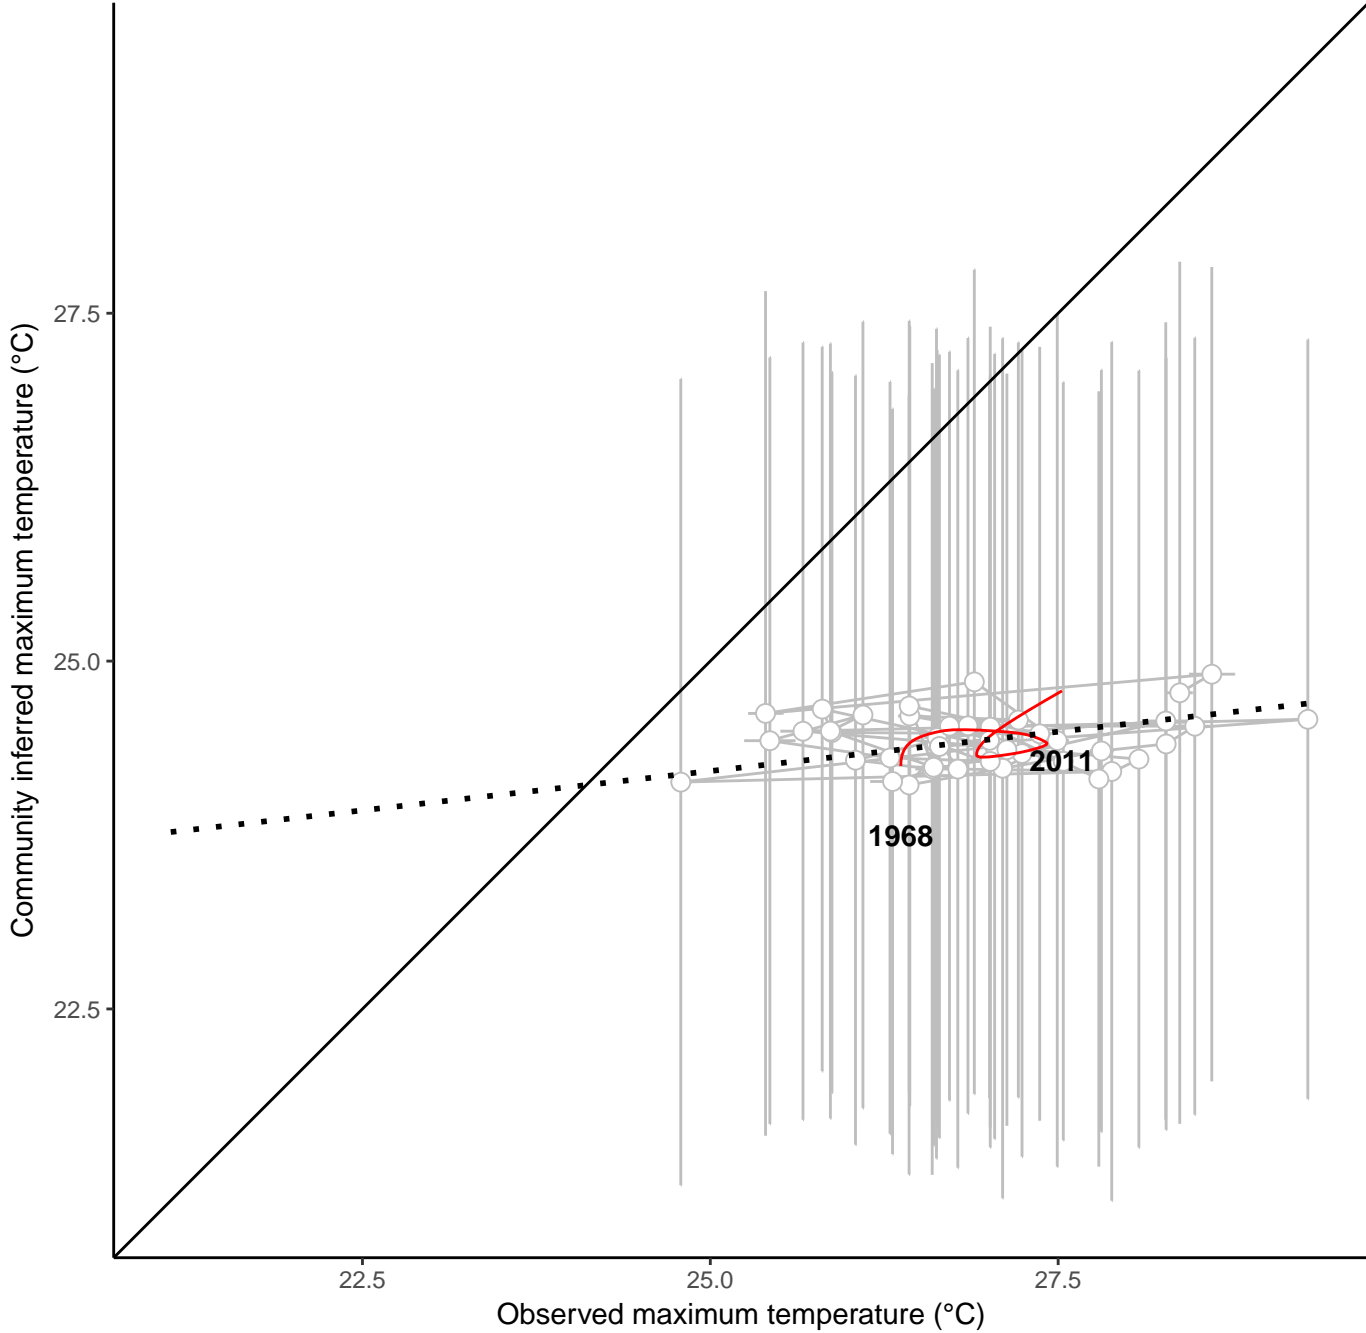

site : 840\_50\_9

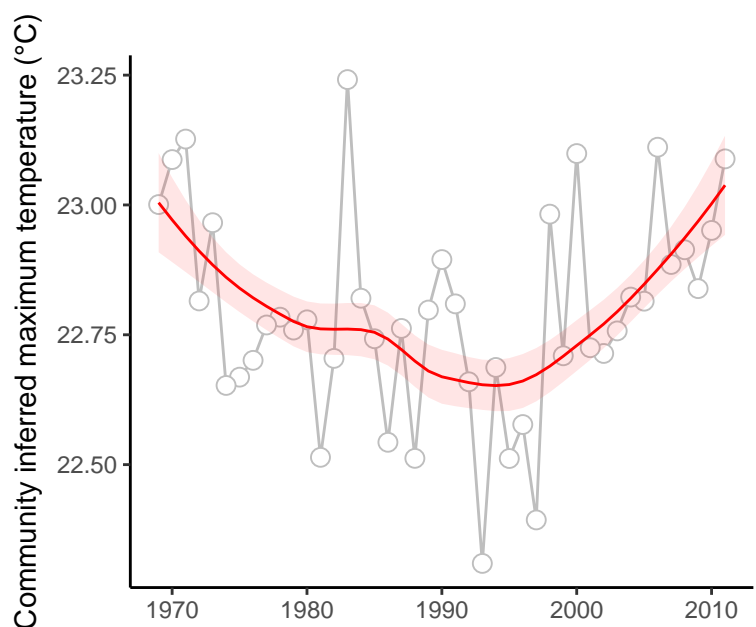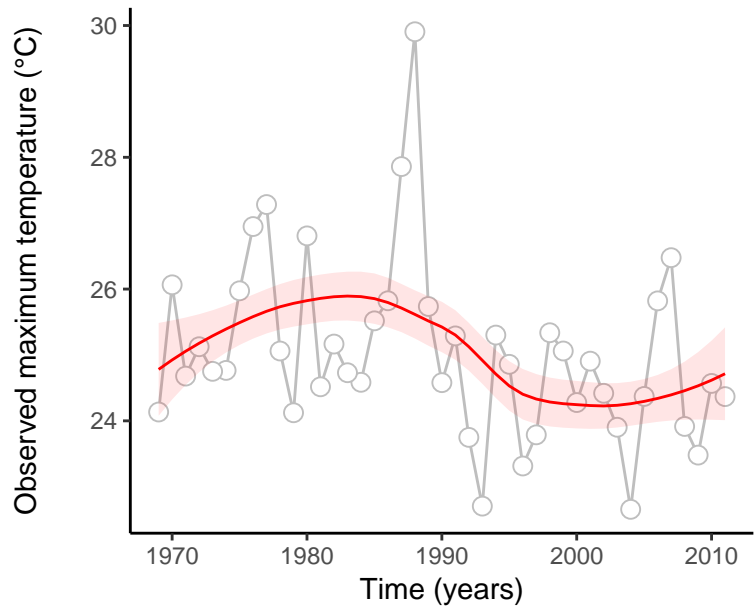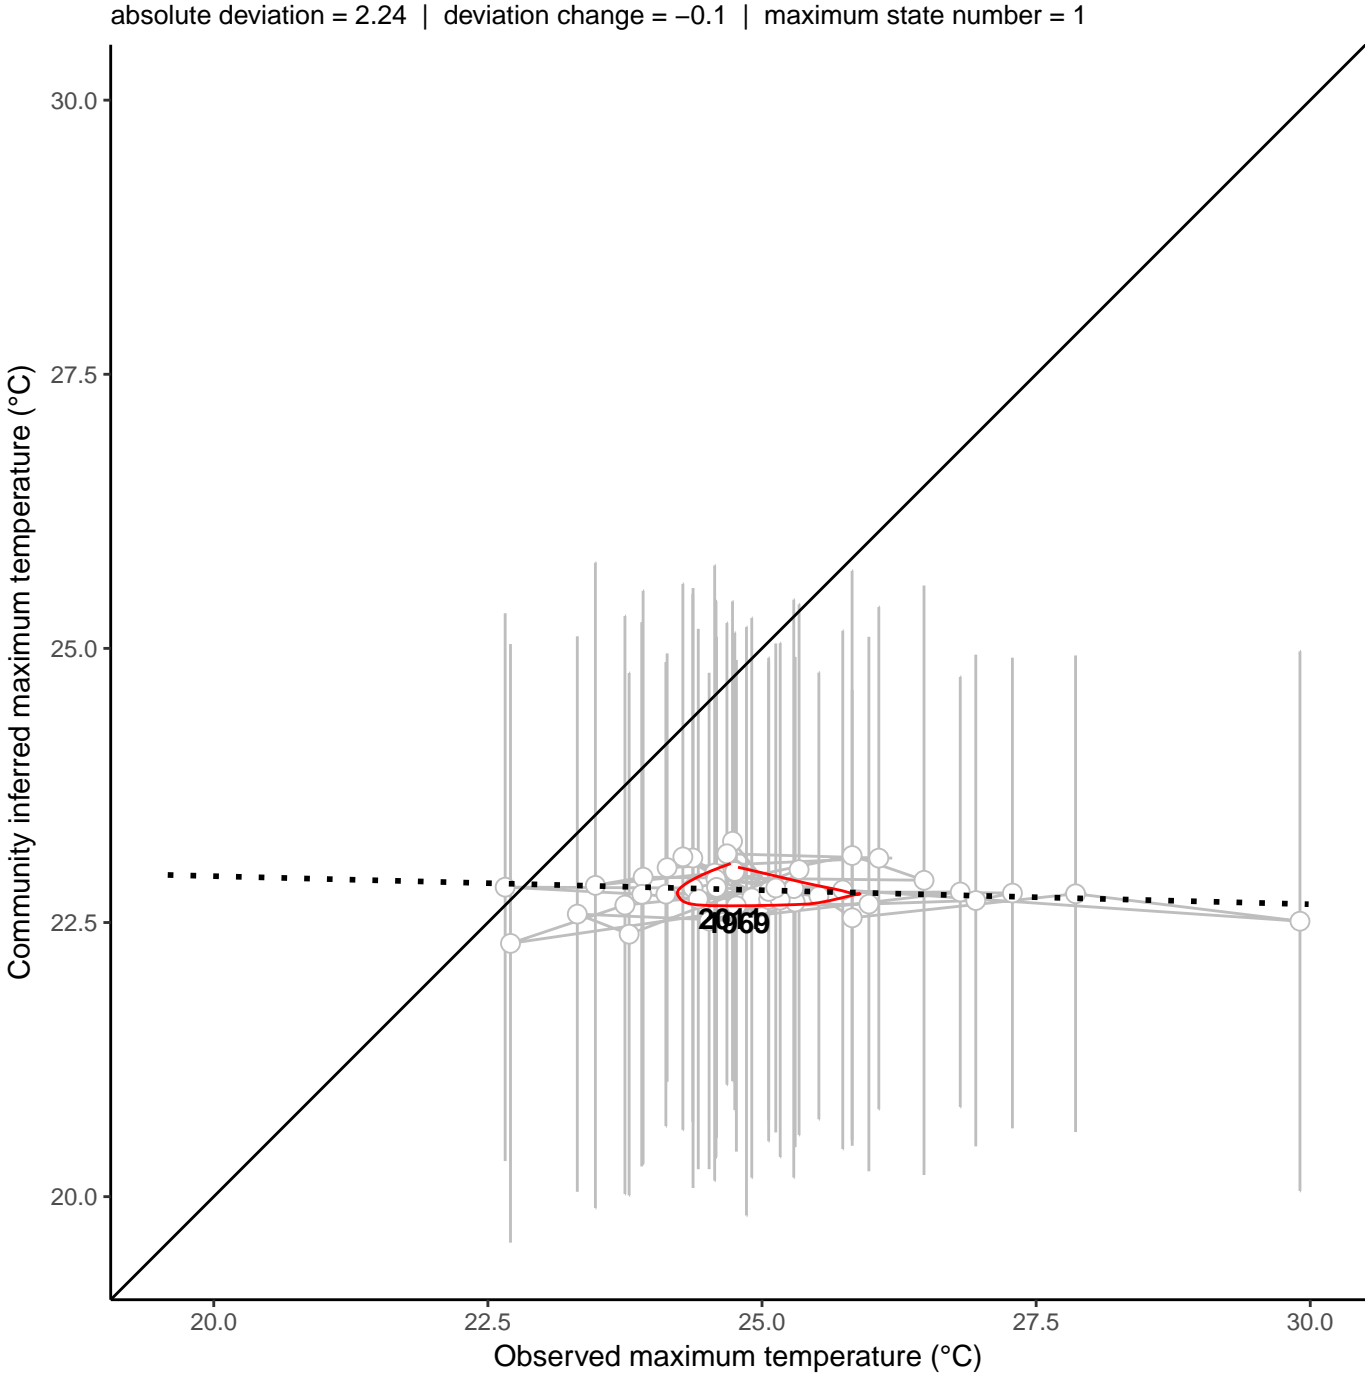

site : 840\_6\_32

absolute deviation = 4.76 | deviation change = 0.21 | maximum state number = 2

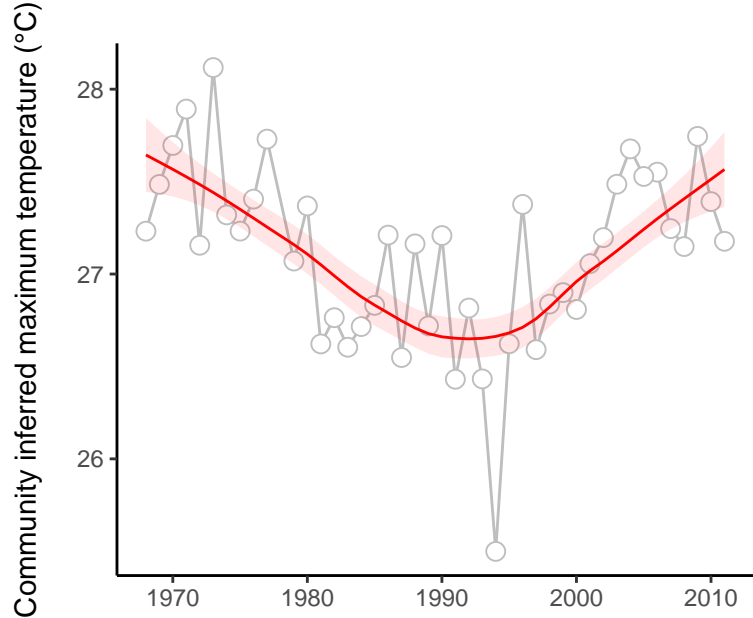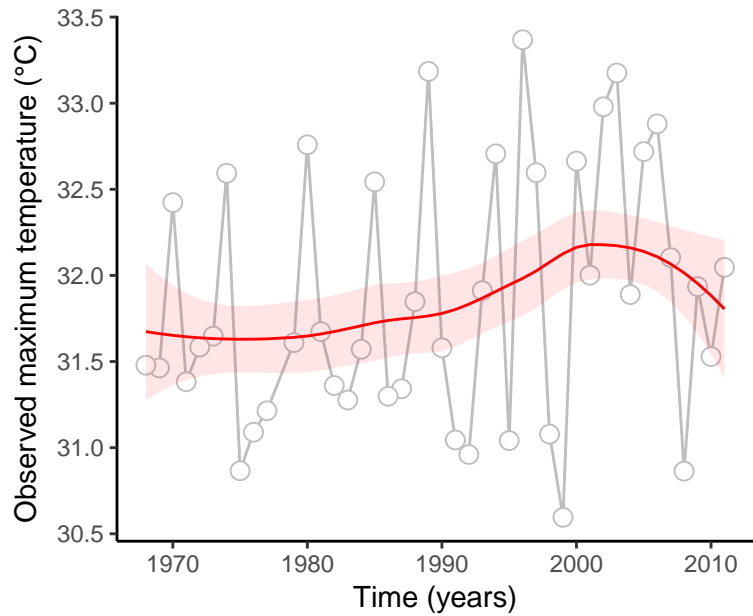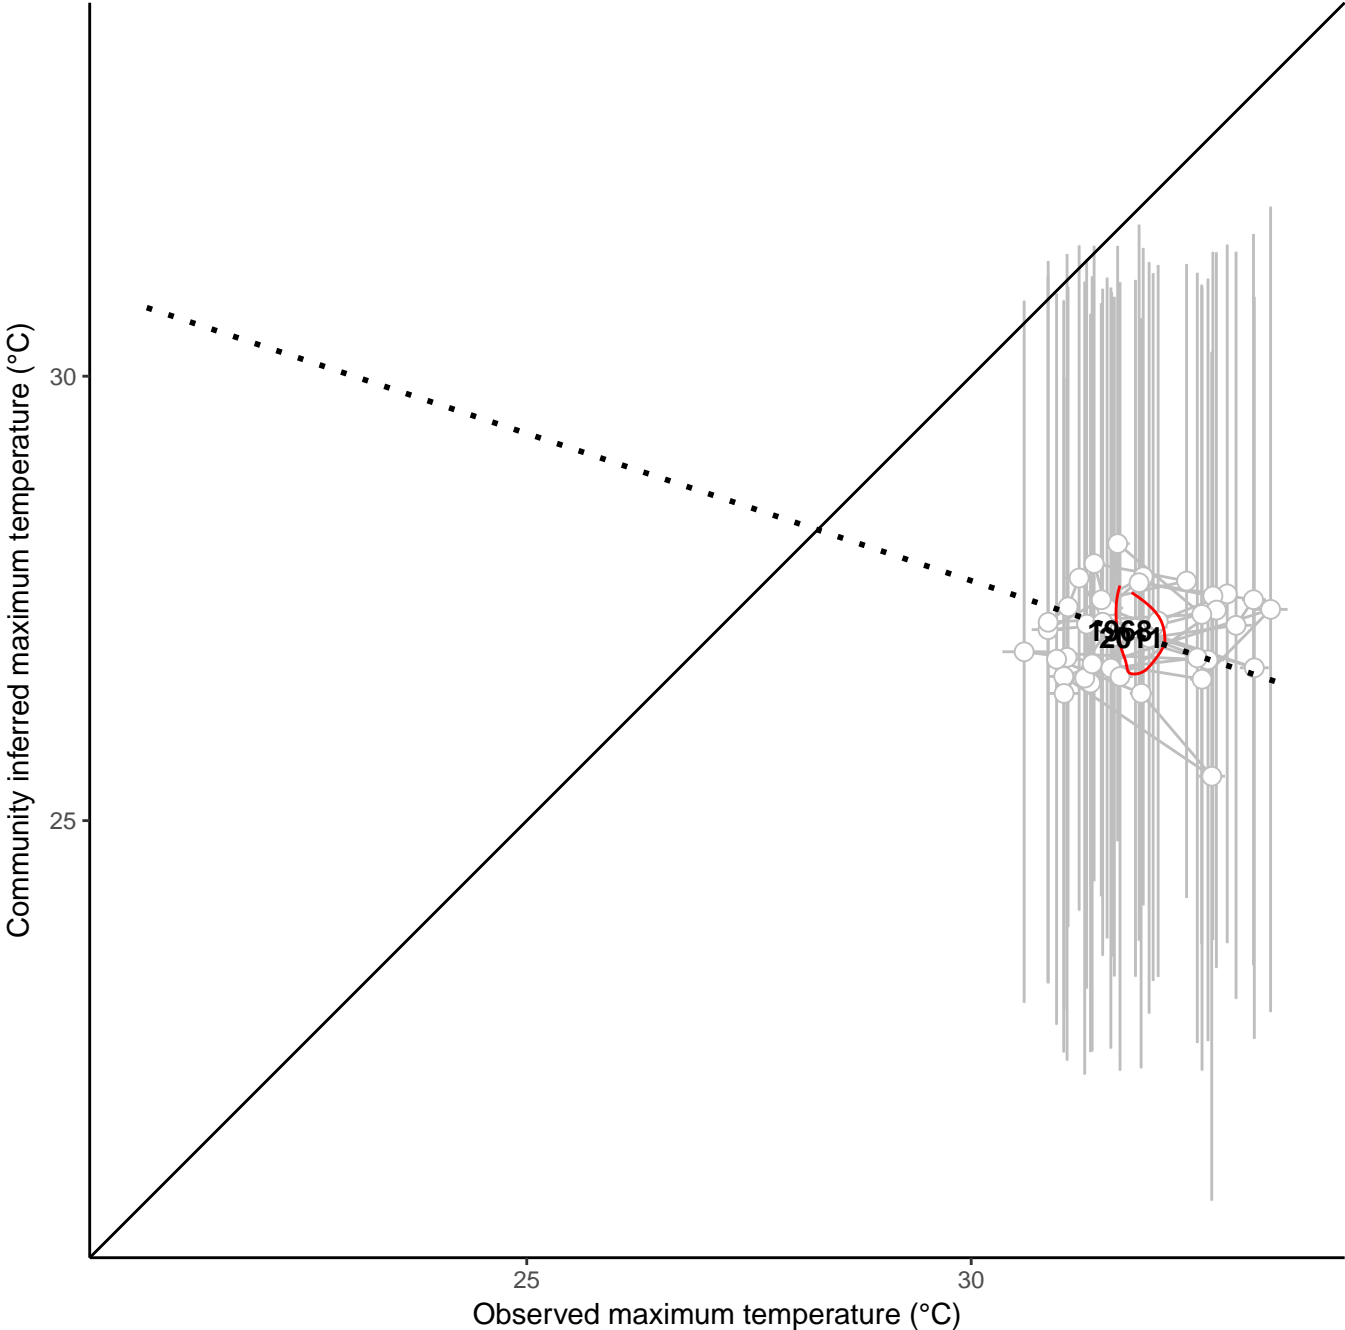



site : 840\_66\_56

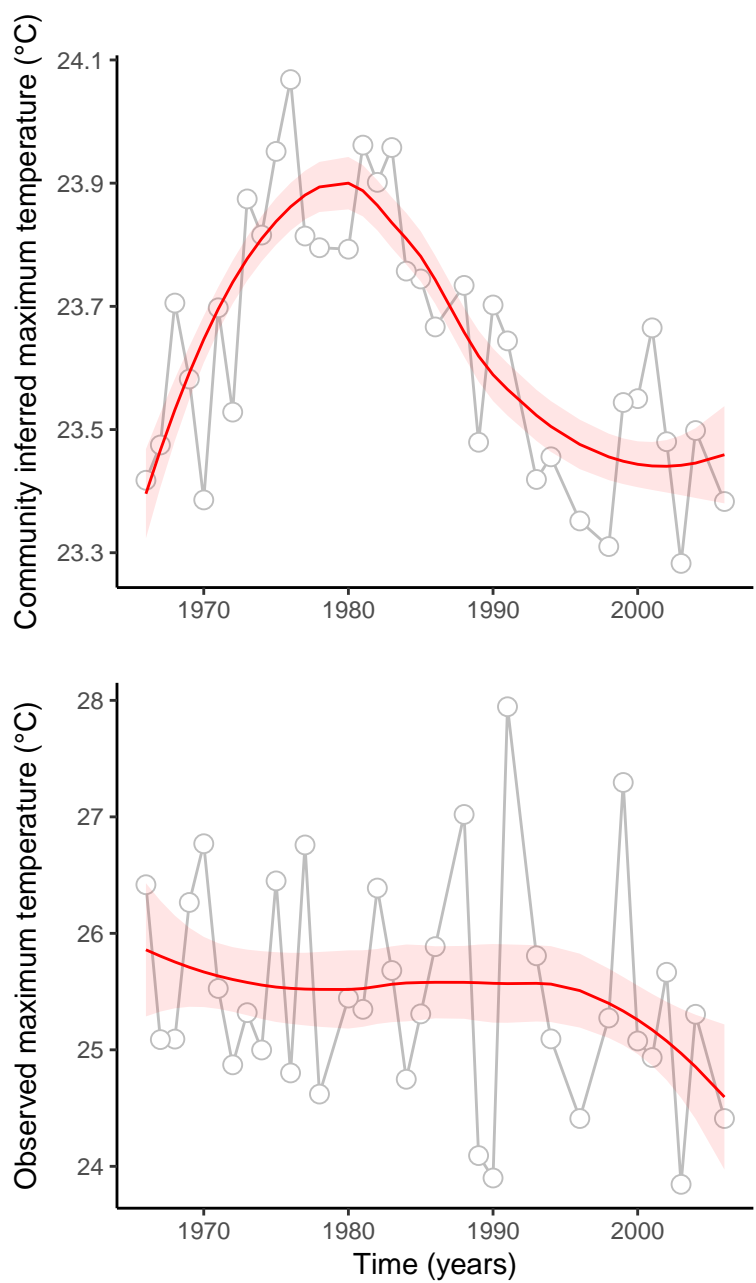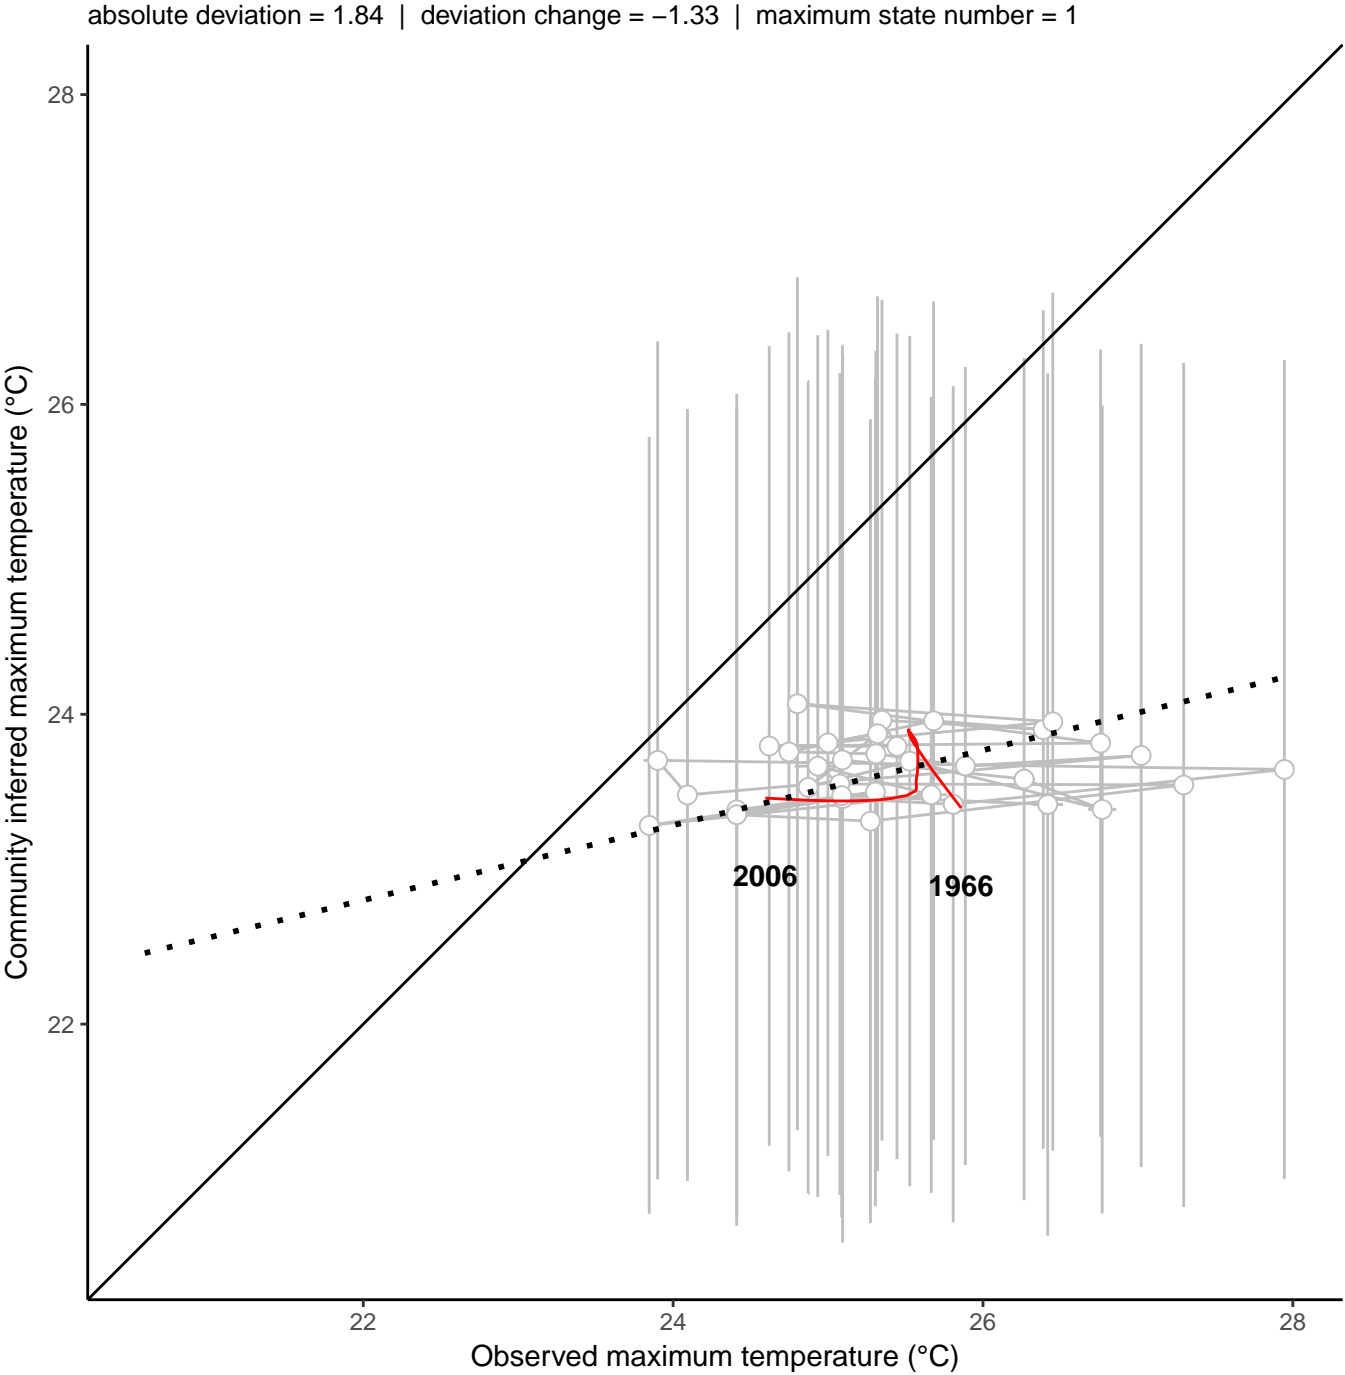

site : 840\_72\_88

absolute deviation = 1.51 | deviation change = -0.04 | maximum state number = 1

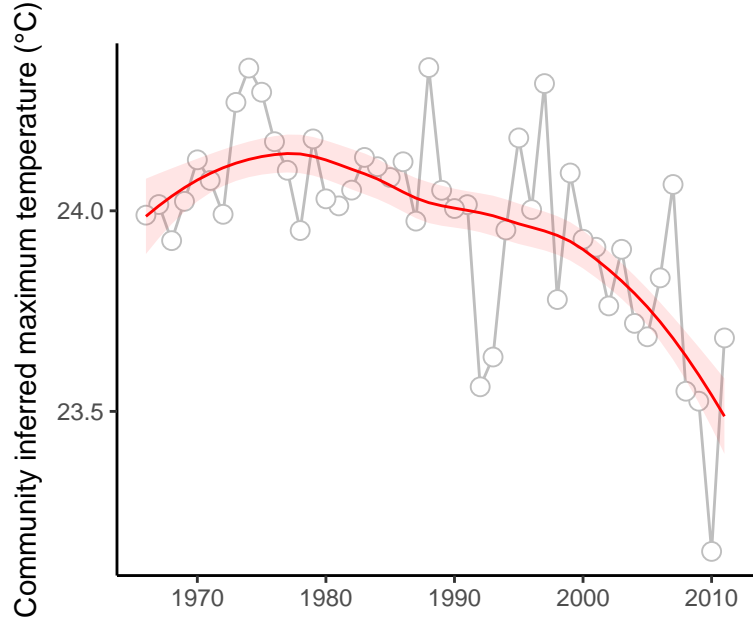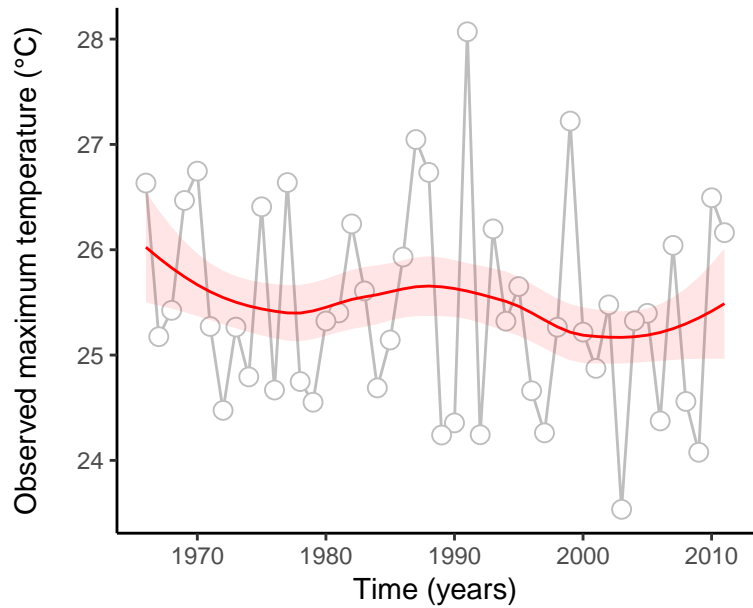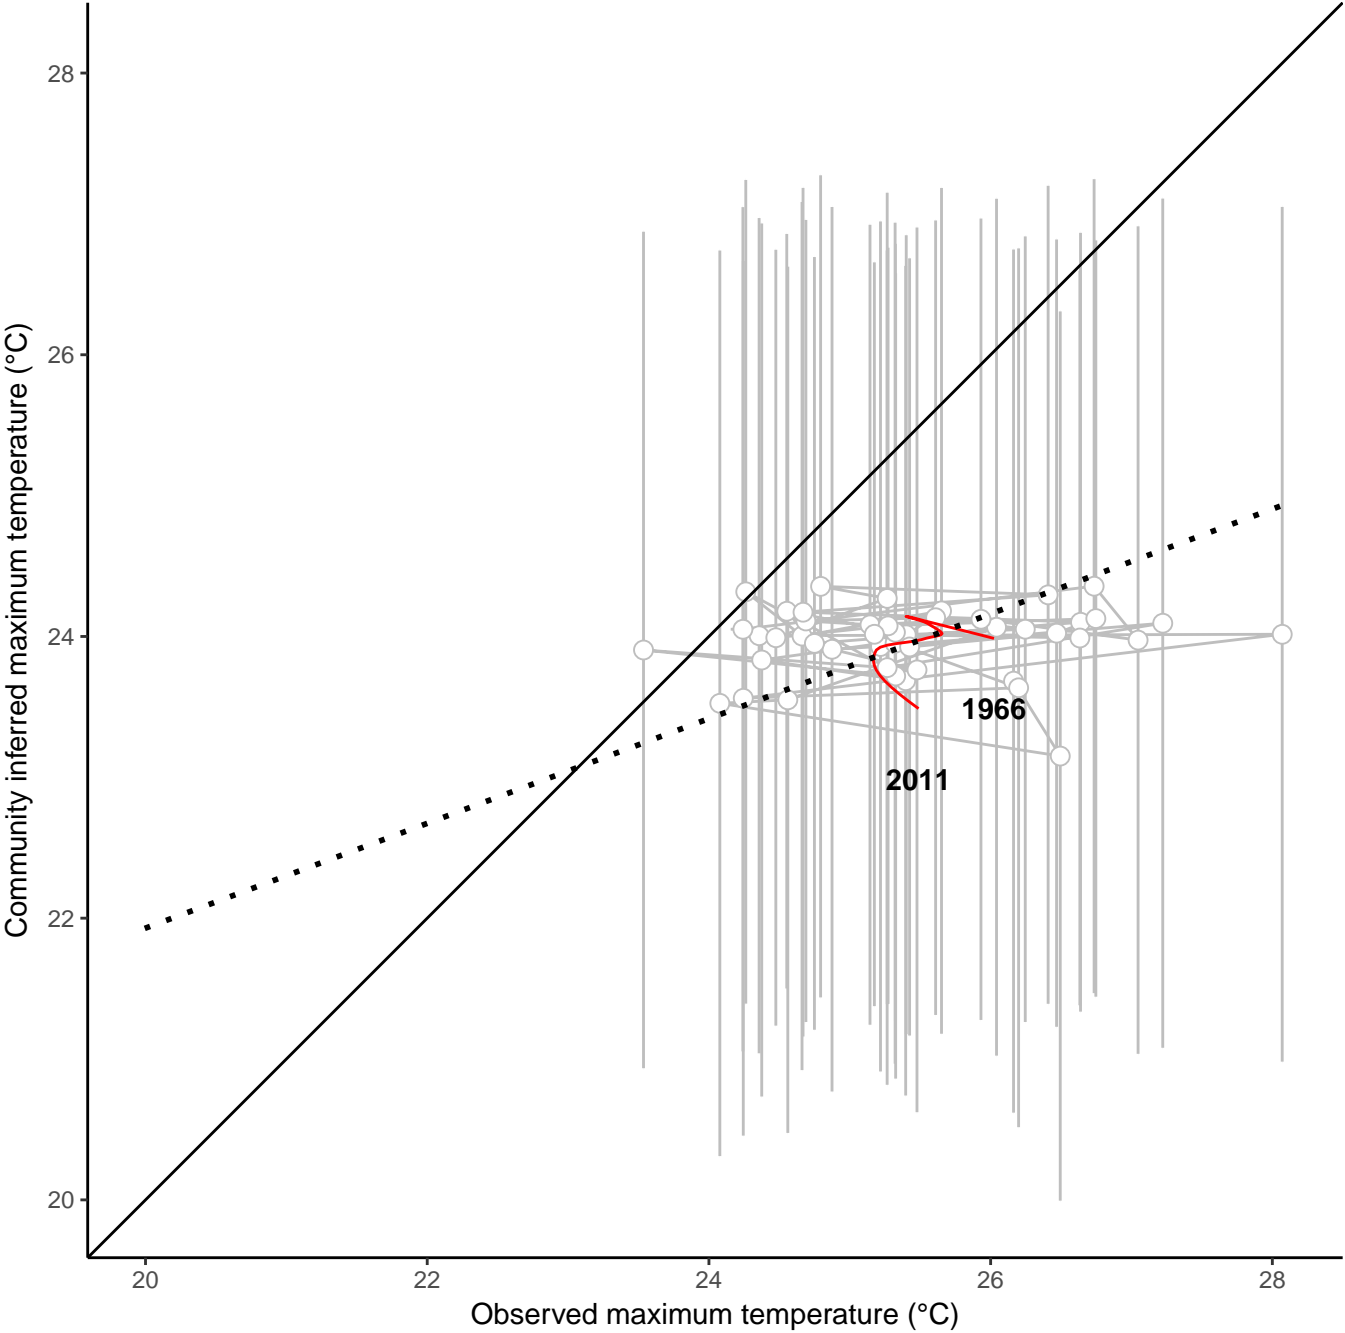

site : 840\_82\_20

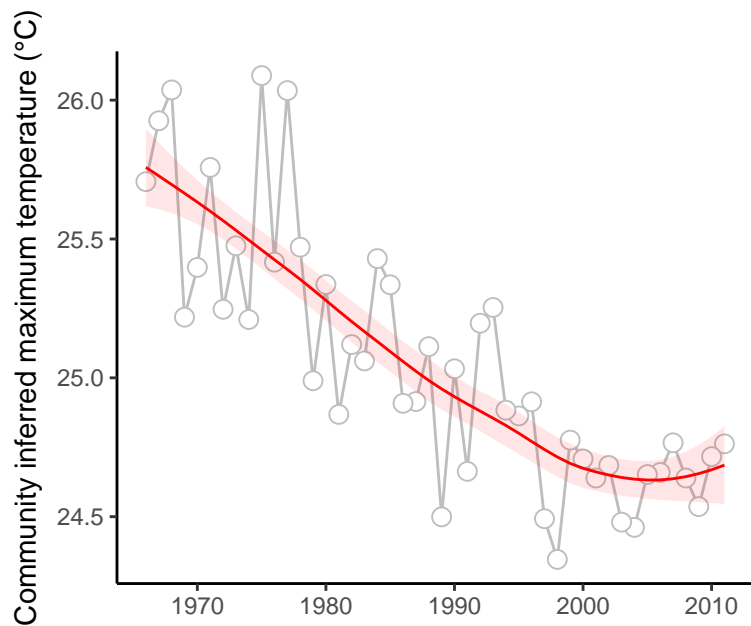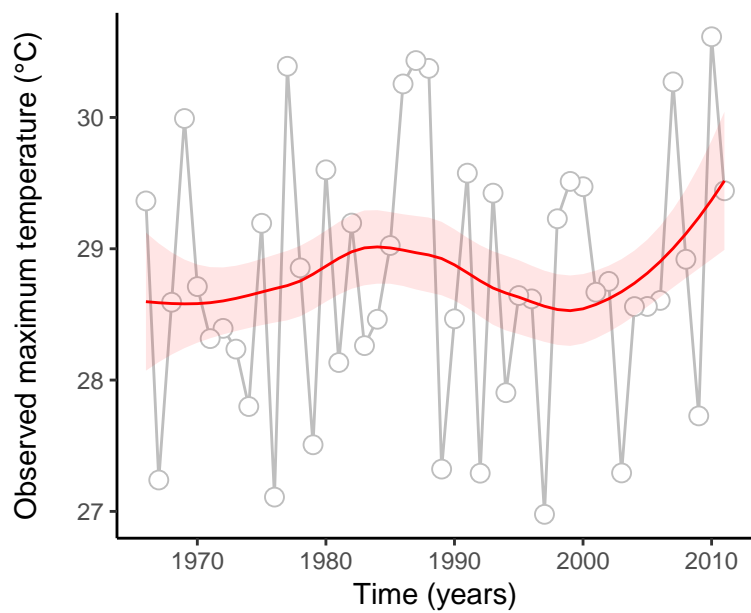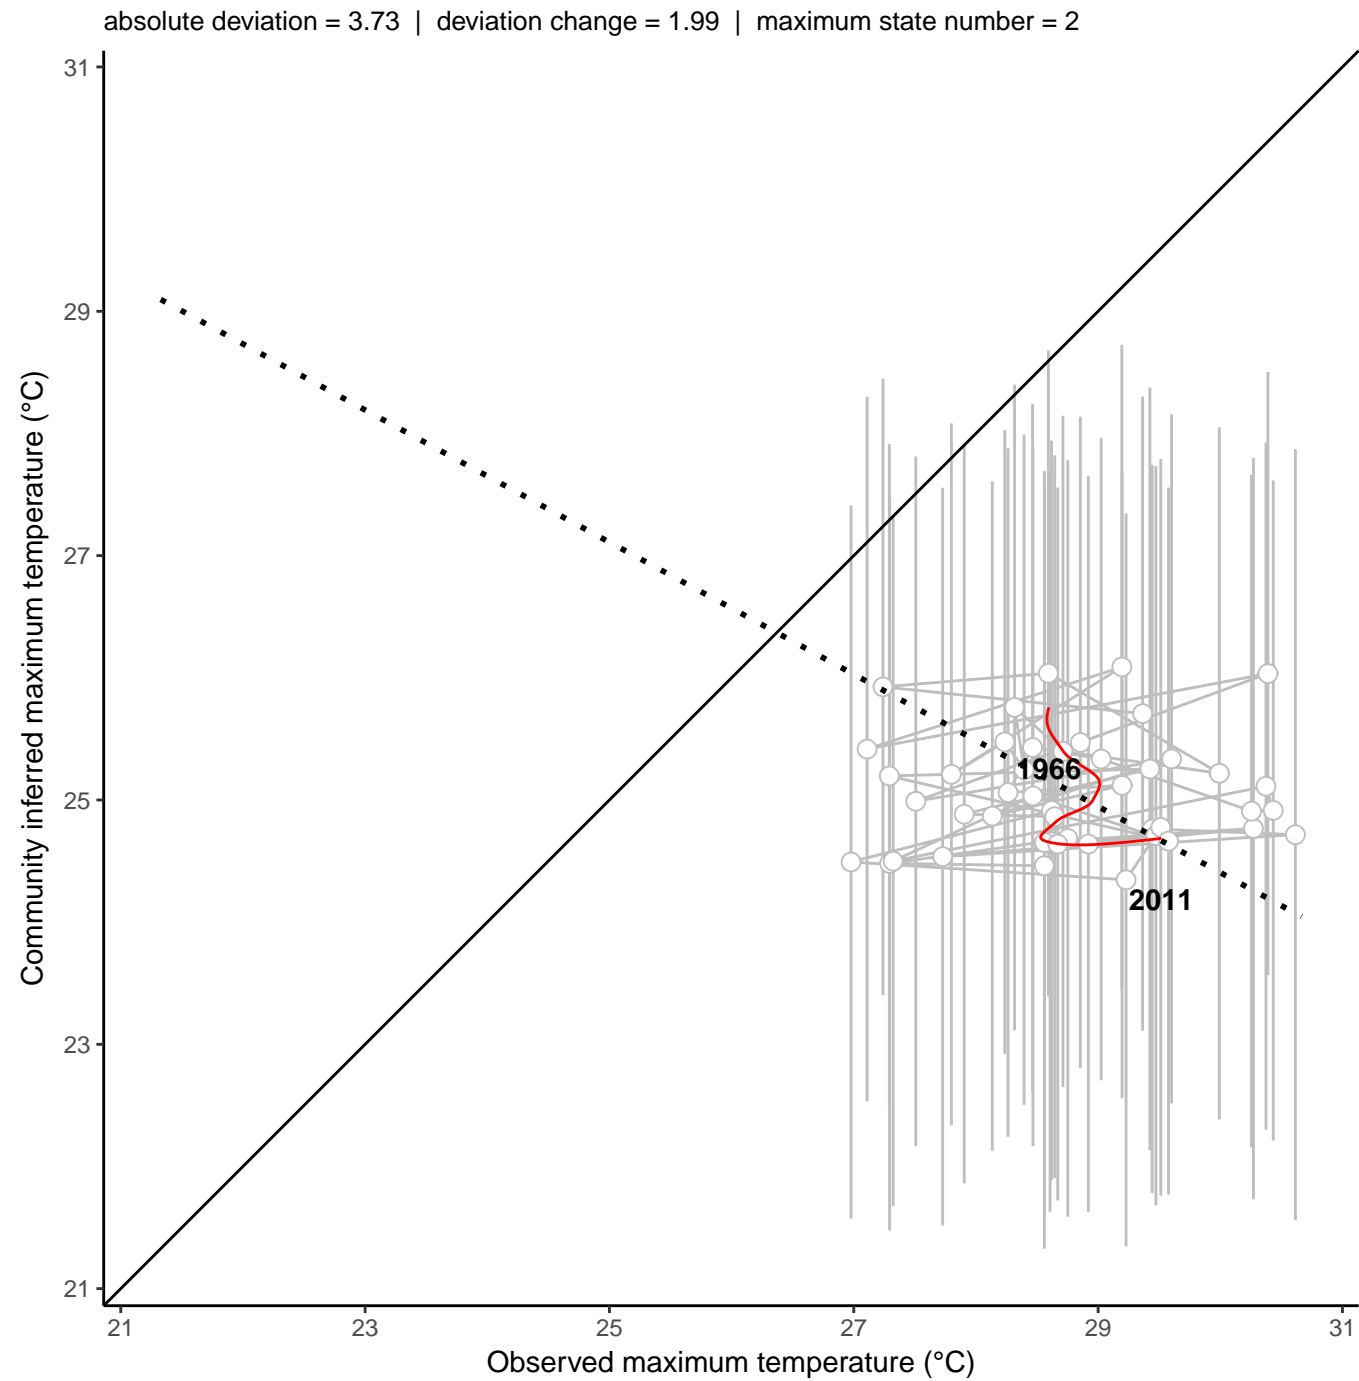

site : 840\_38\_21

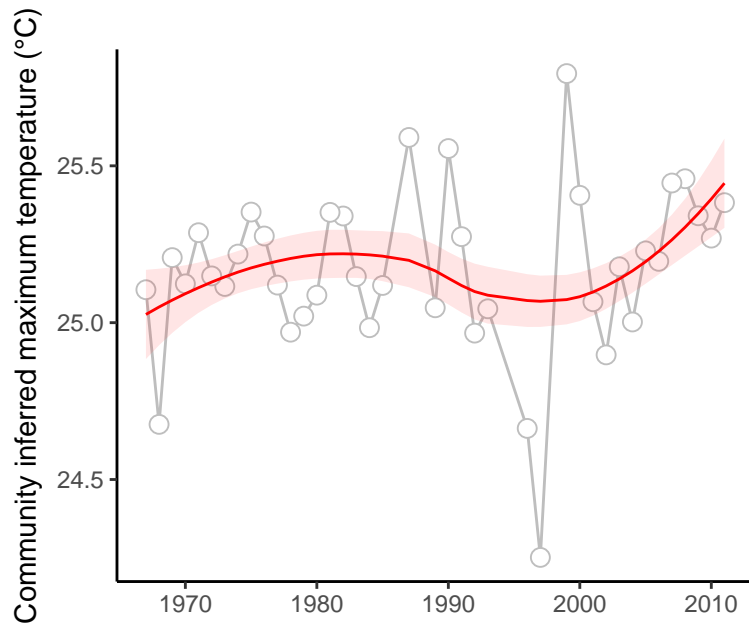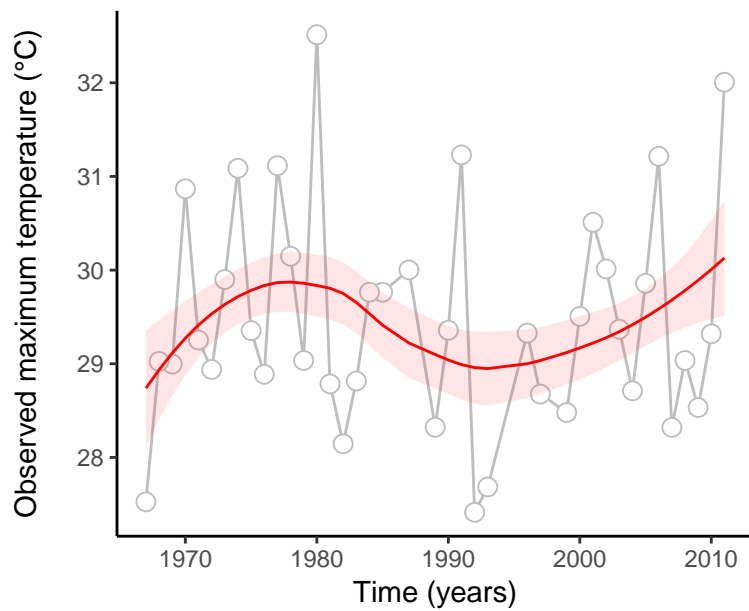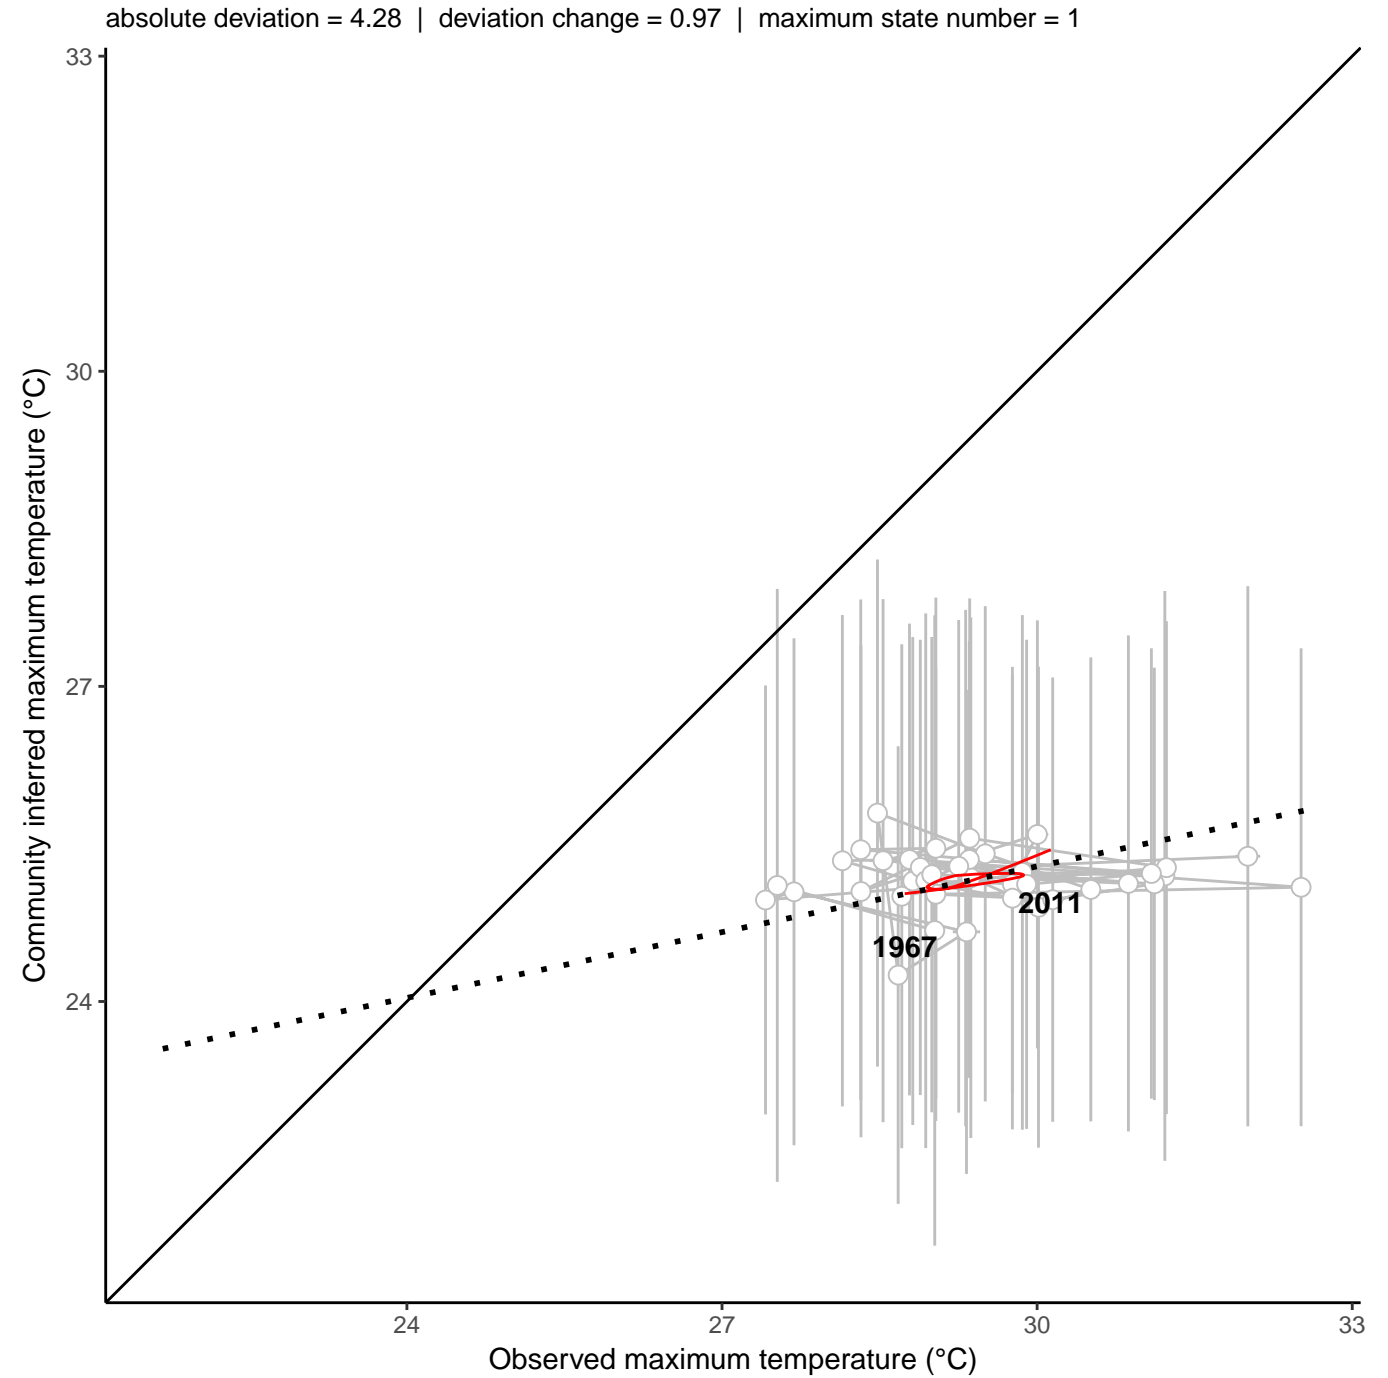

site : 840\_39\_3

absolute deviation = 3.86 | deviation change = 2.61 | maximum state number = 2

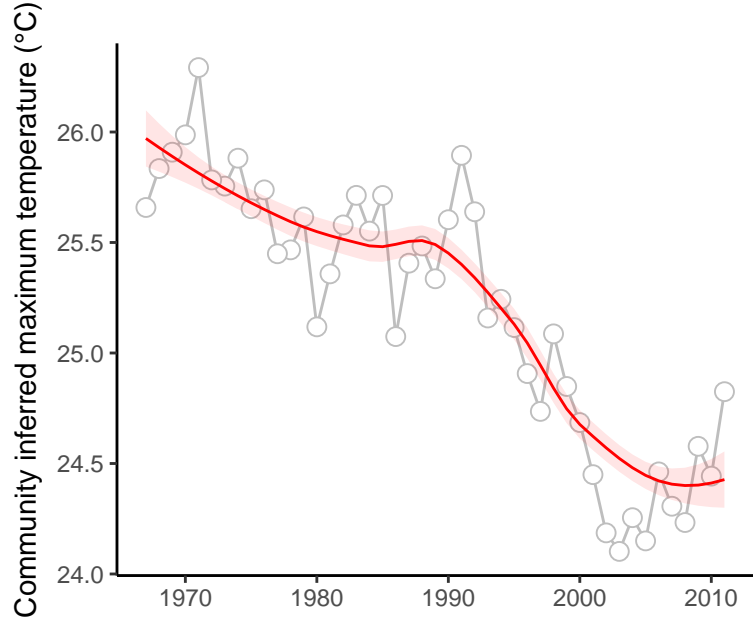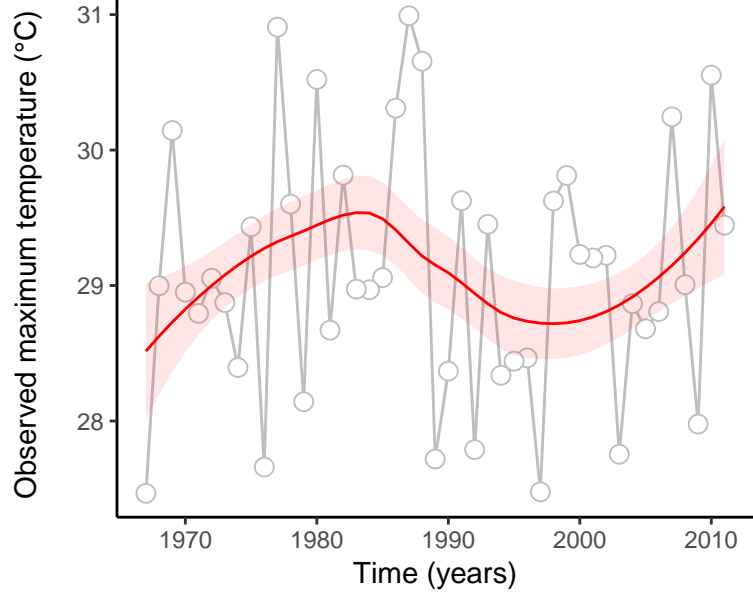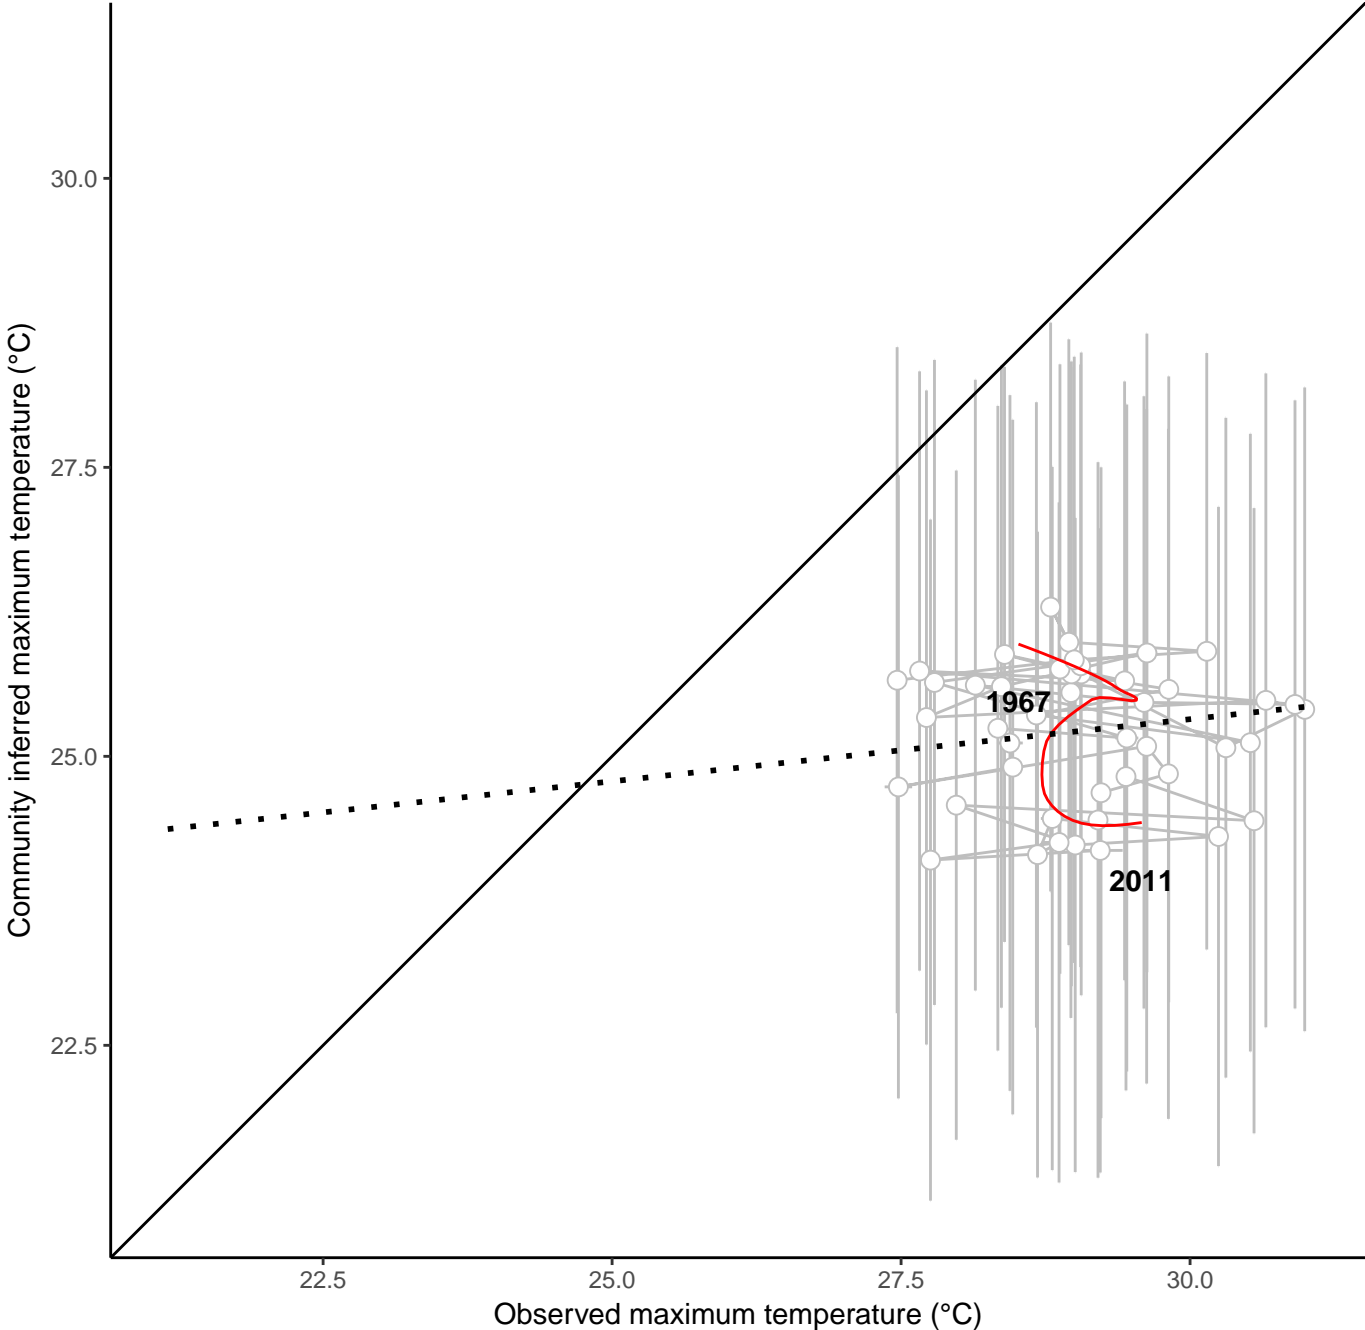

site : 840\_46\_8

absolute deviation = 2.78 | deviation change = 0.58 | maximum state number = 1

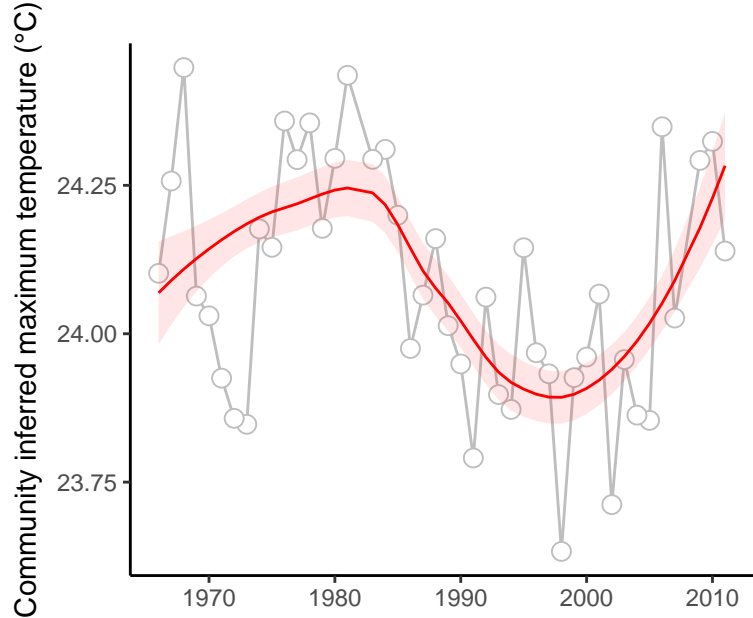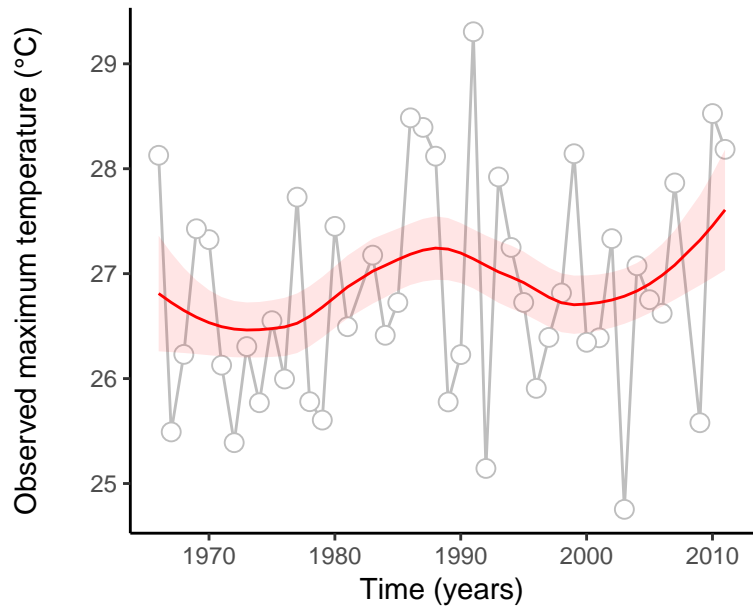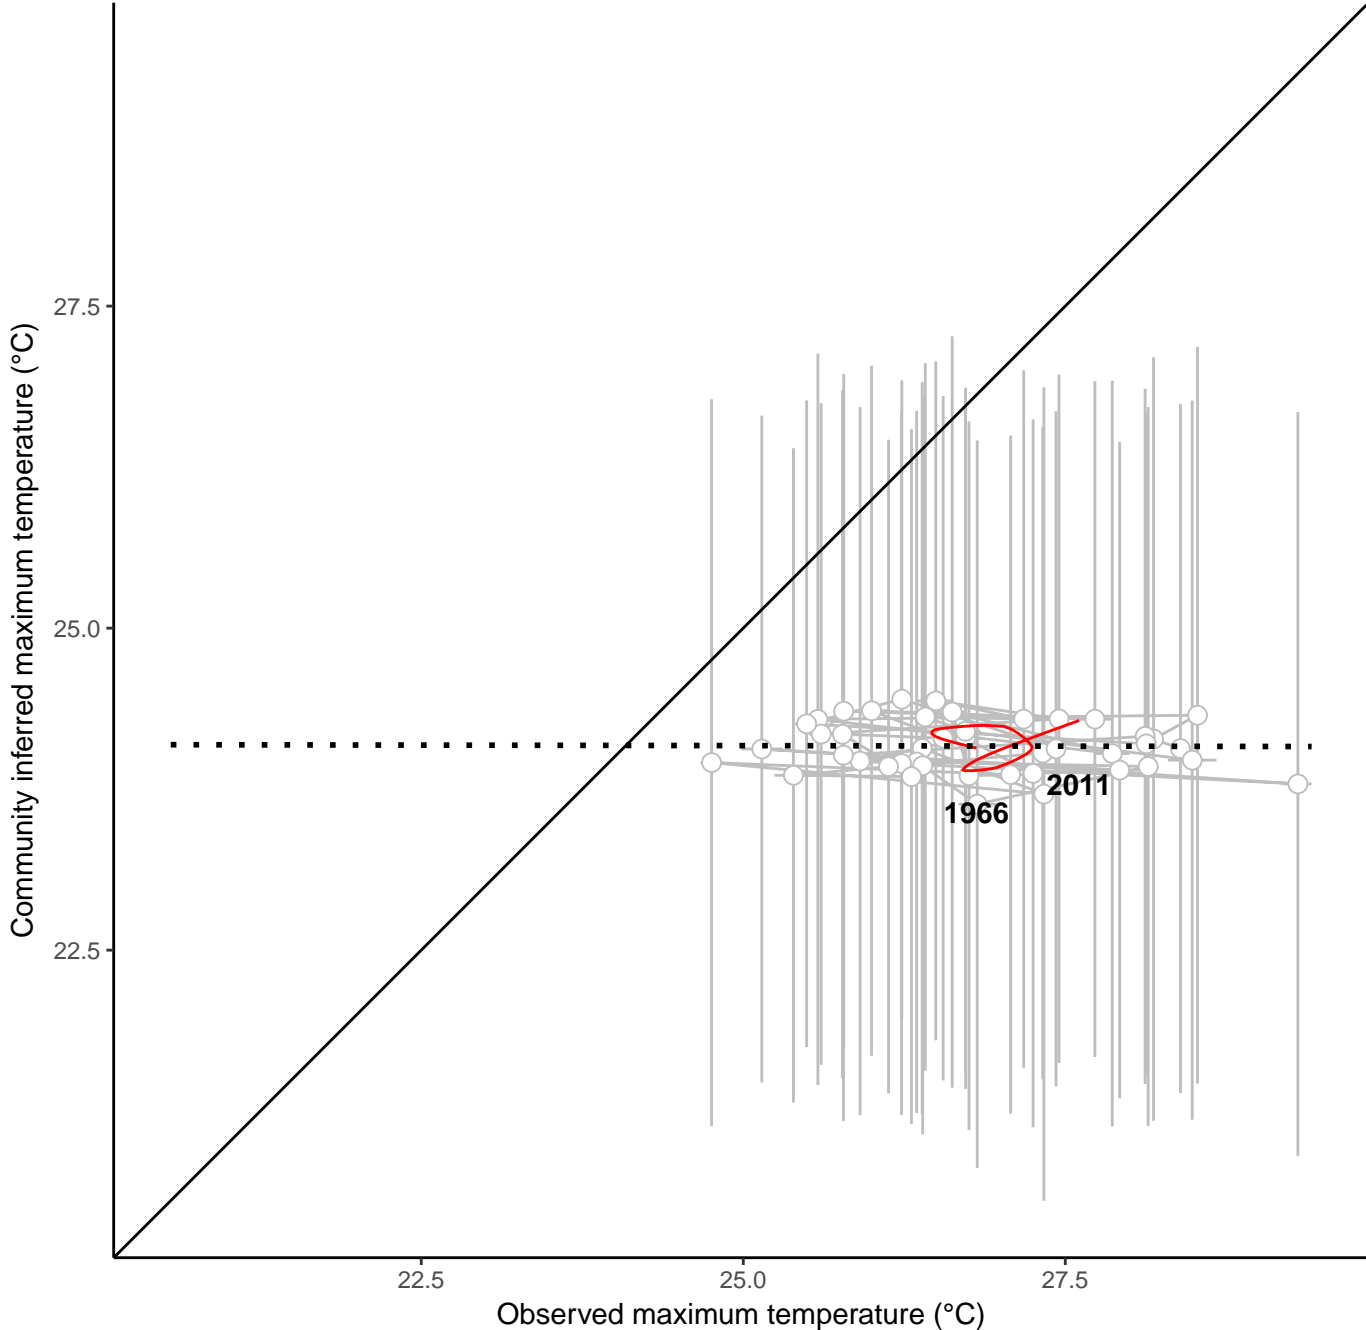

site : 840\_49\_35

absolute deviation = 1.98 | deviation change = 0.88 | maximum state number = 1

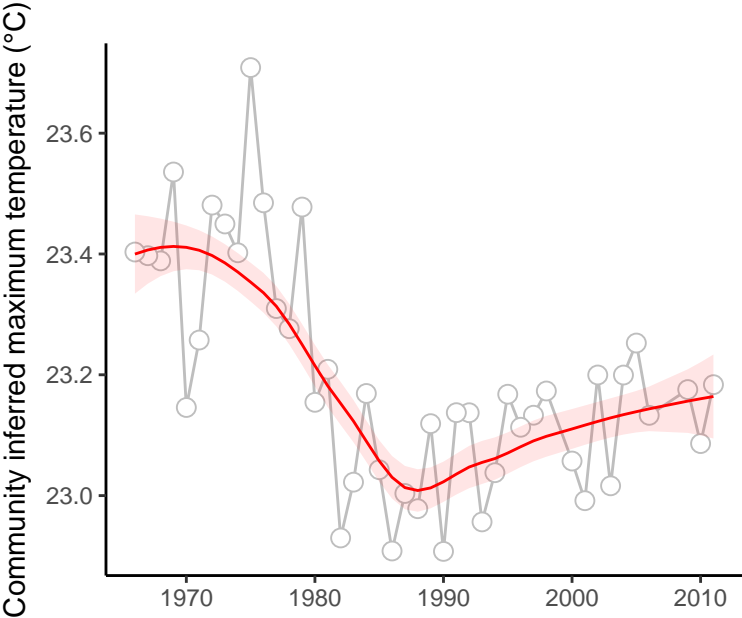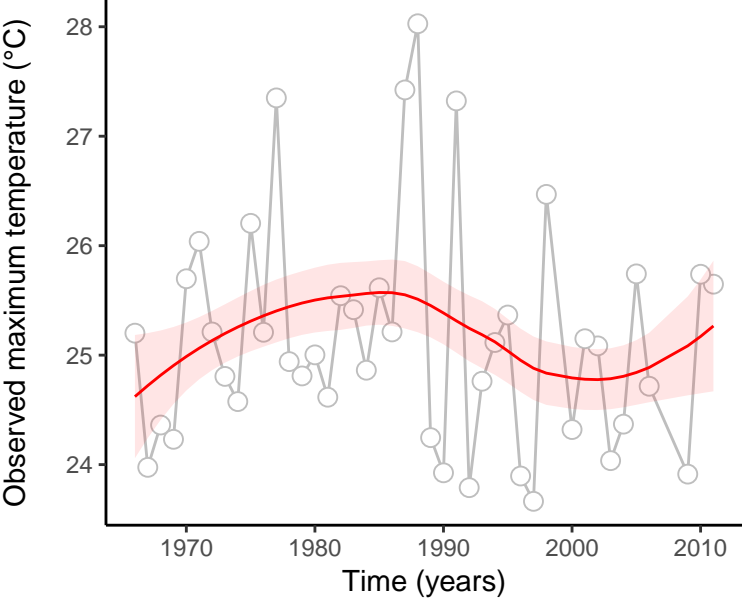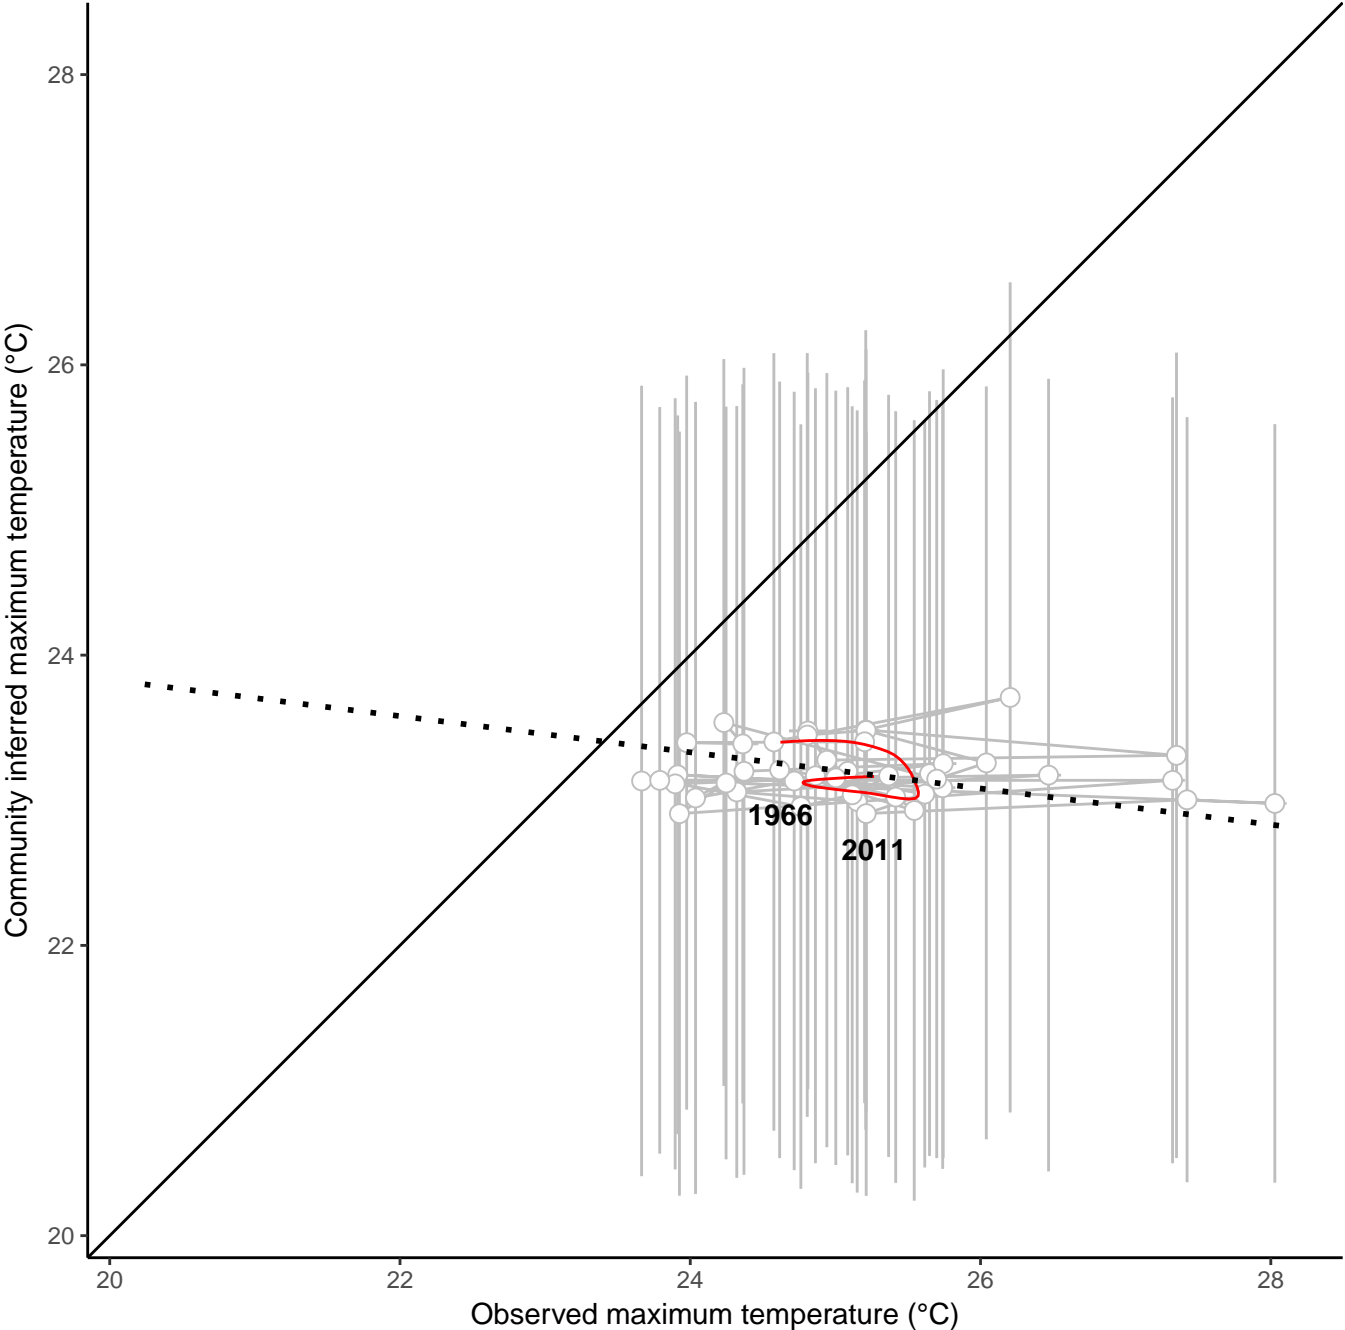

site : 840\_64\_26

absolute deviation = 0.59 | deviation change = 0 | maximum state number = 1

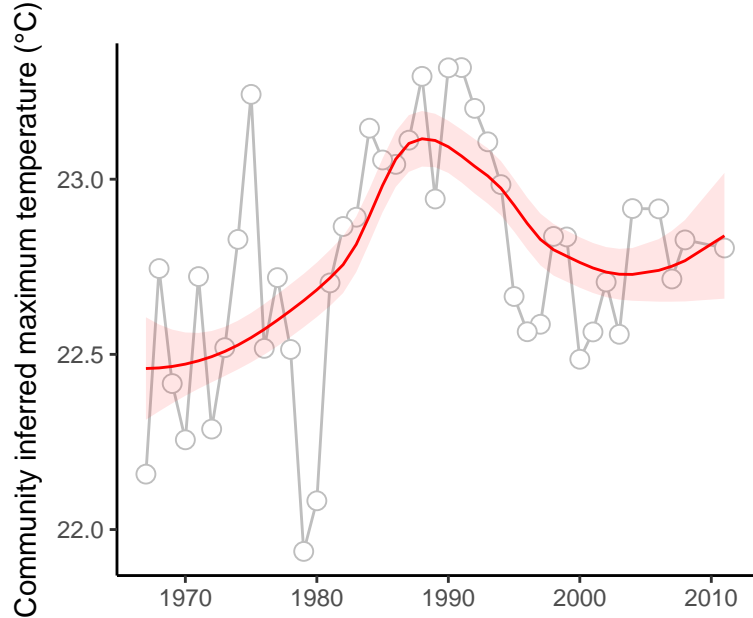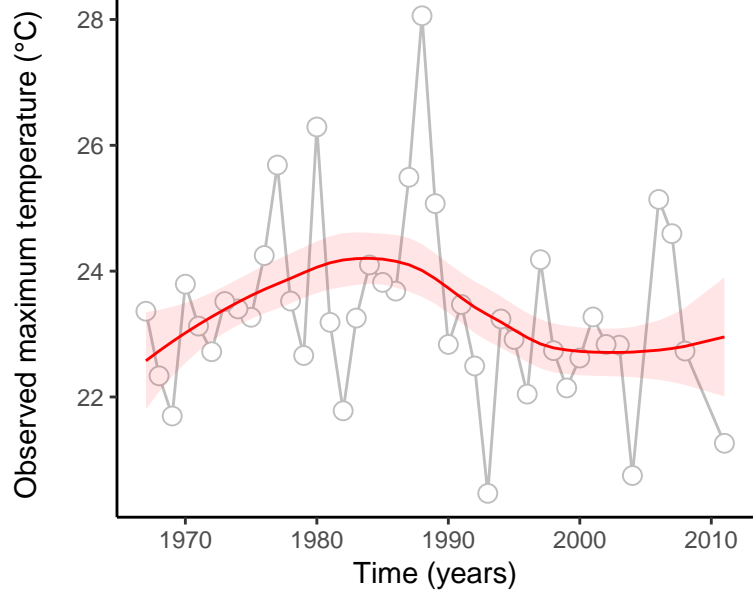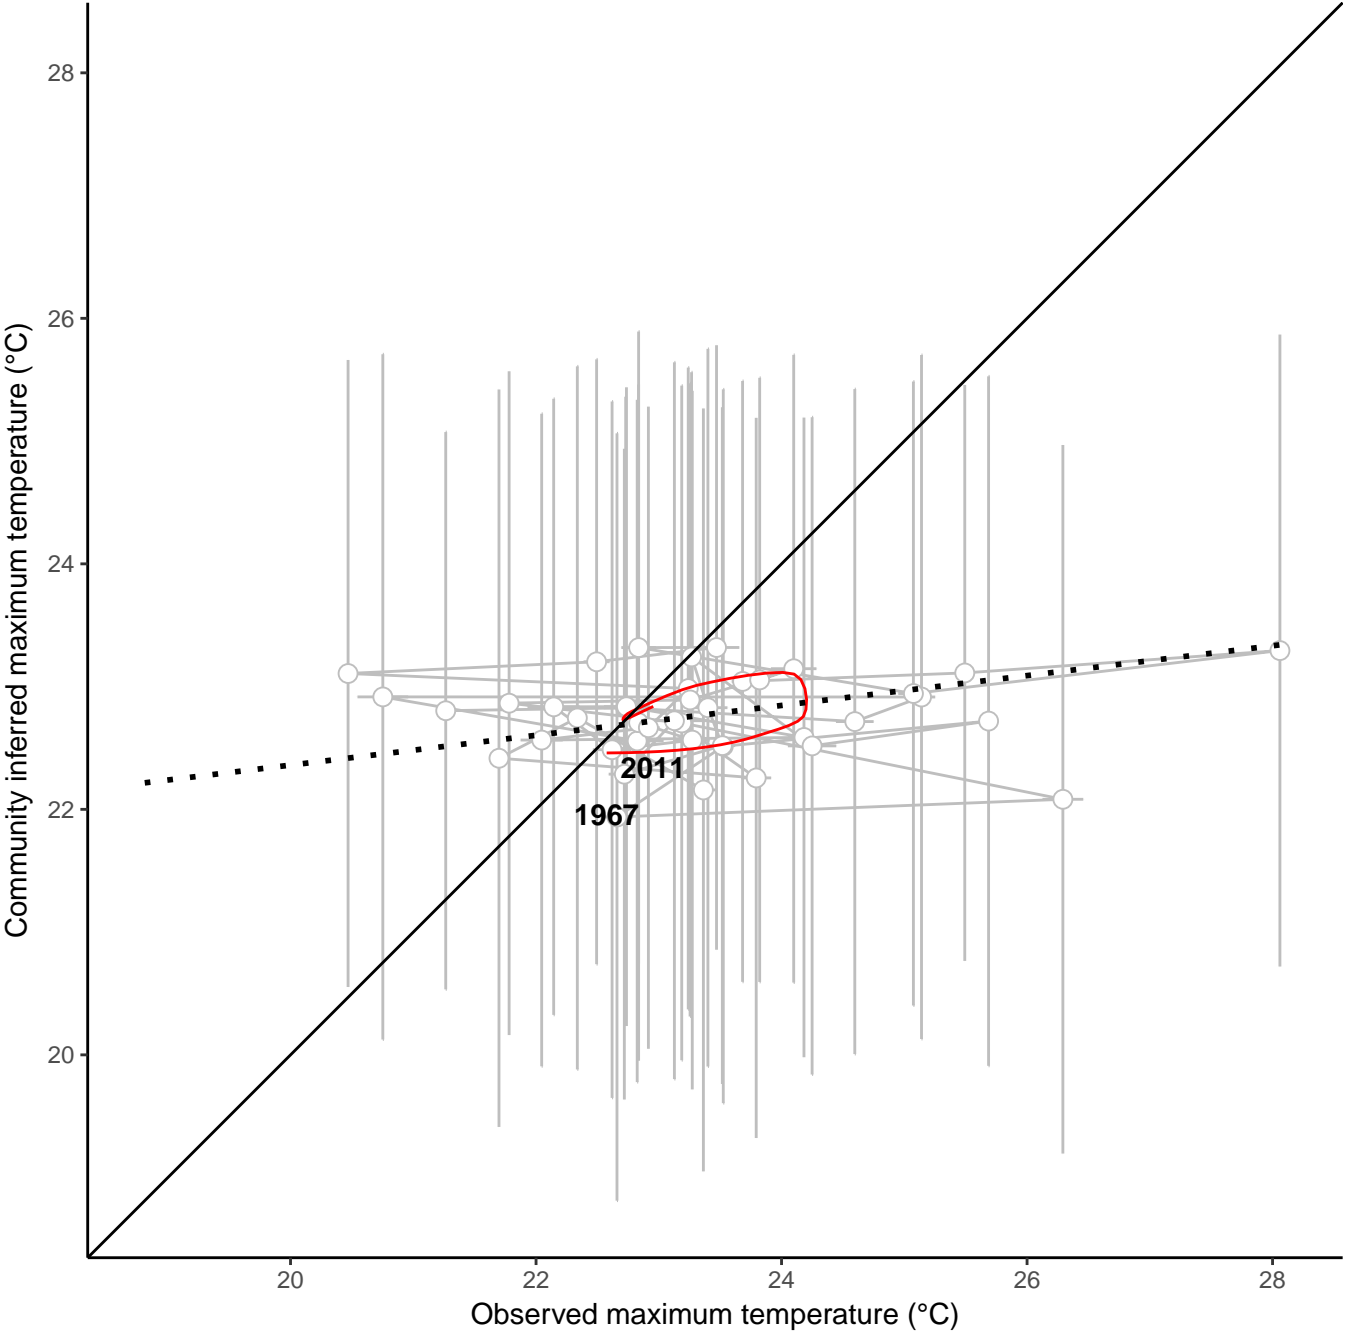



site : 840\_66\_76

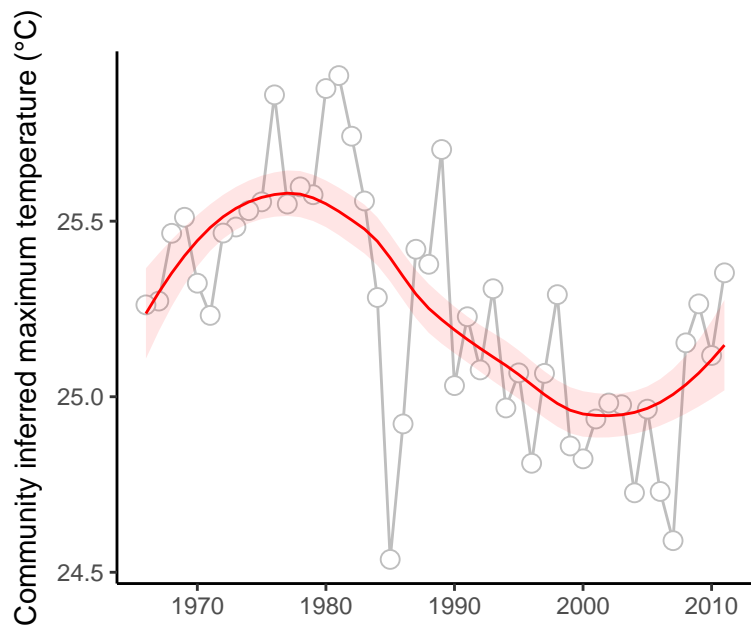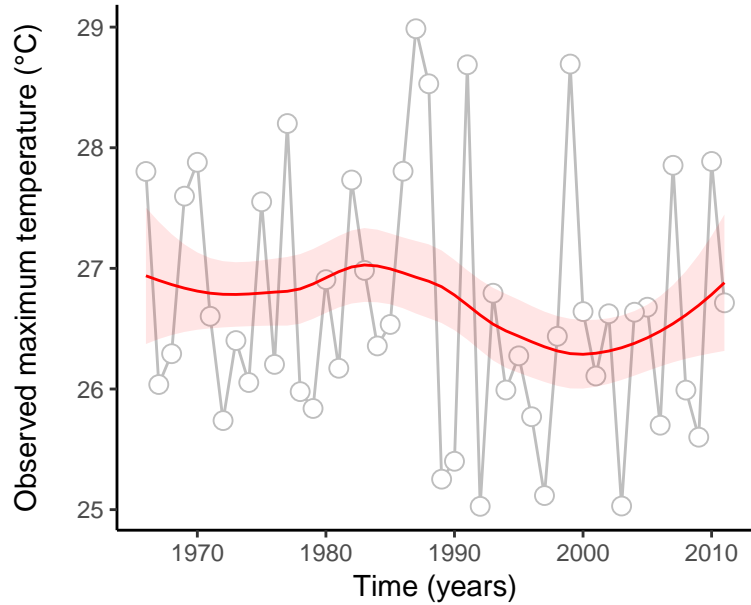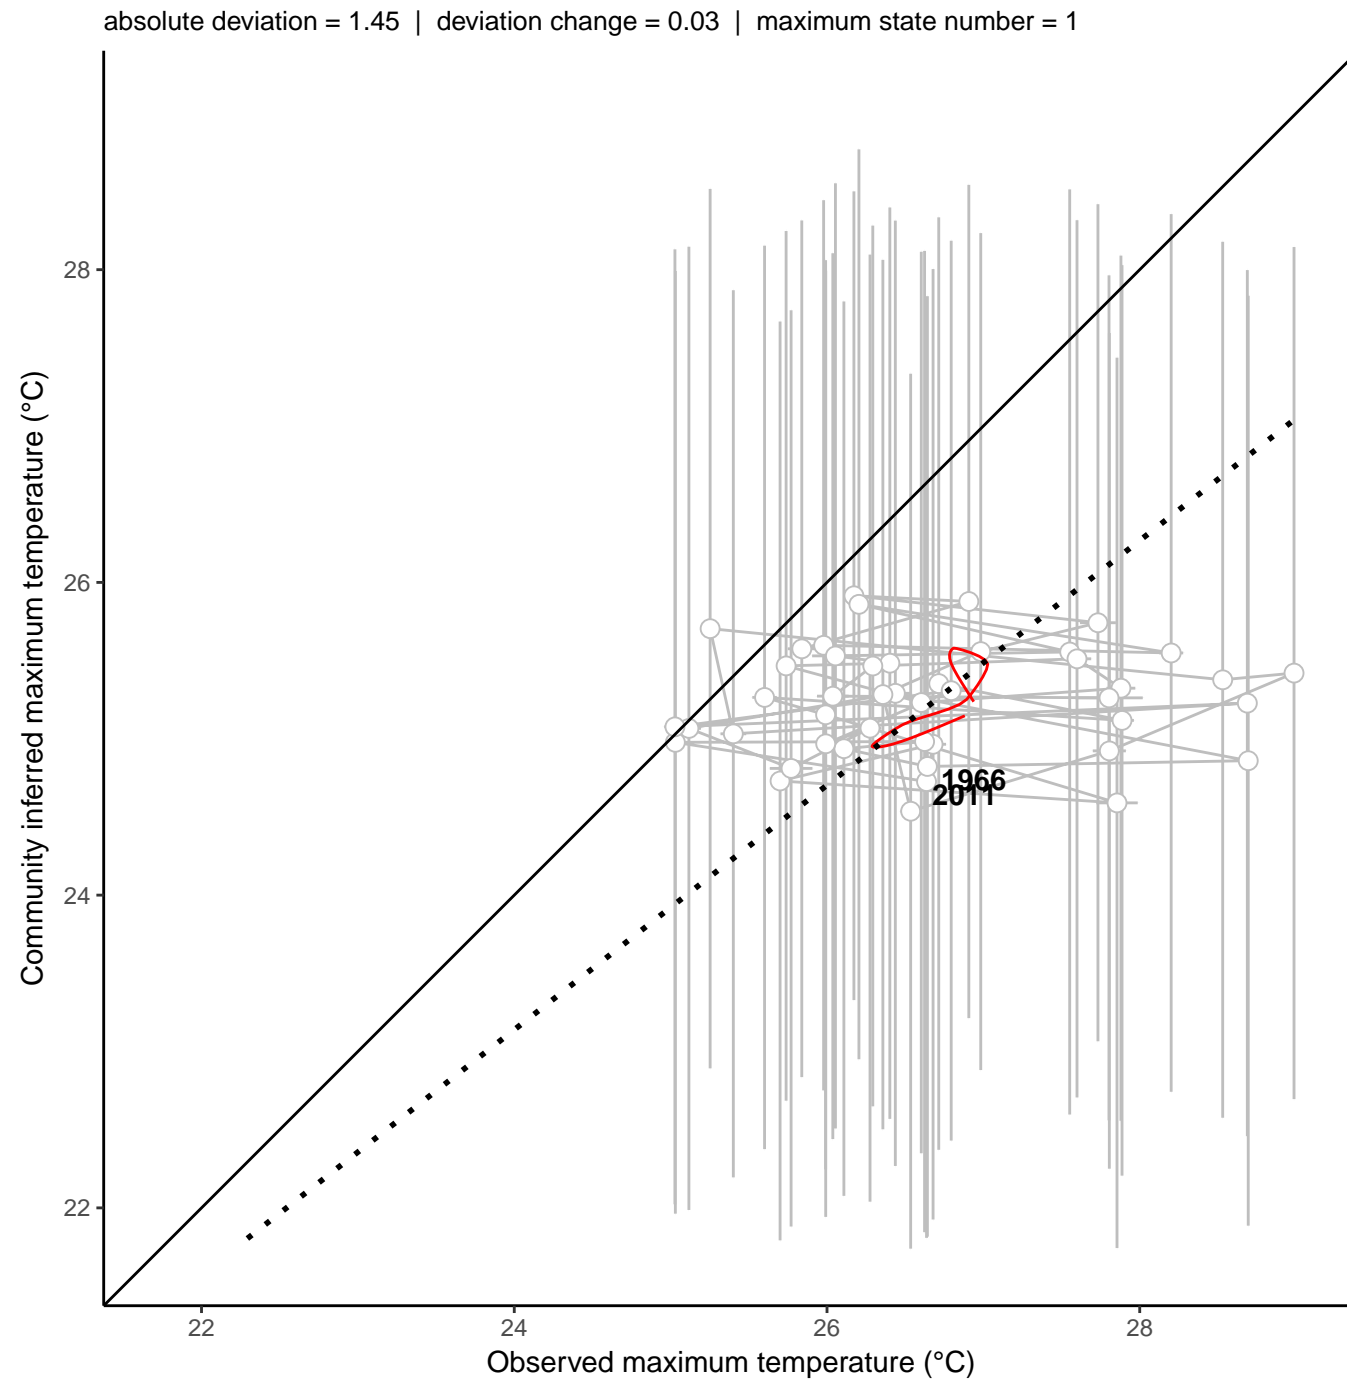

site : 840\_67\_15

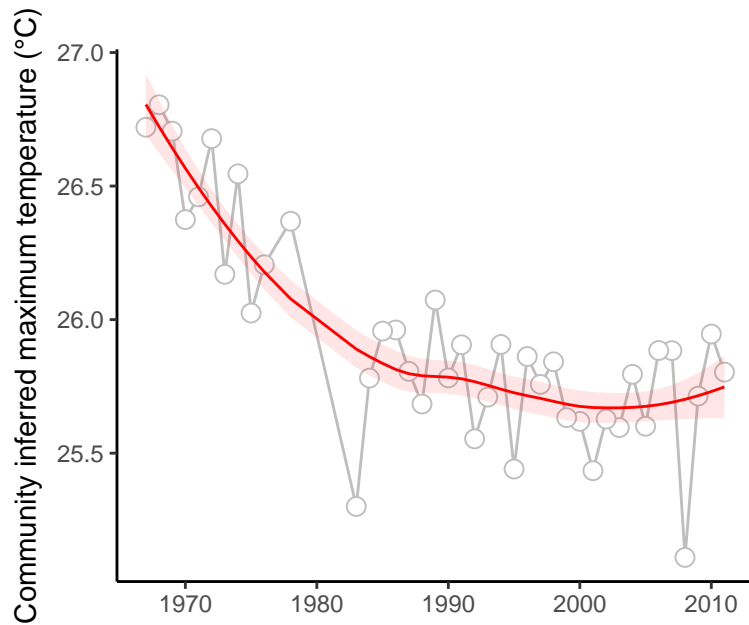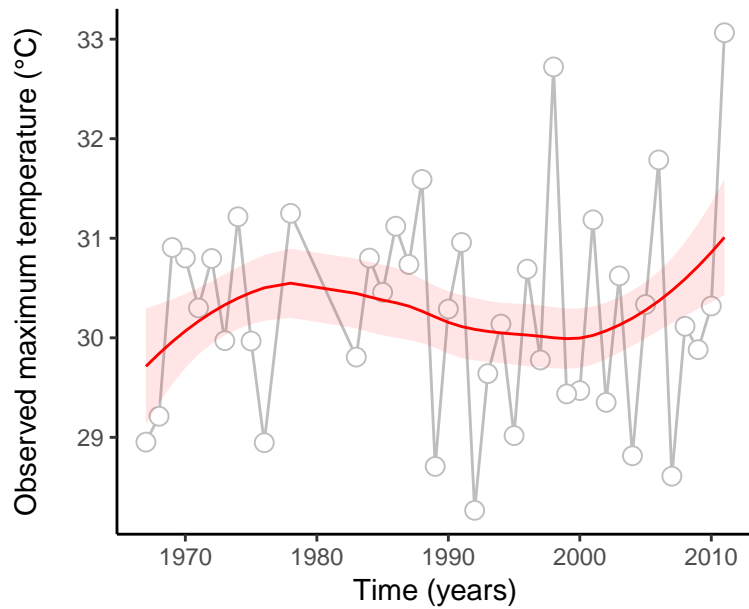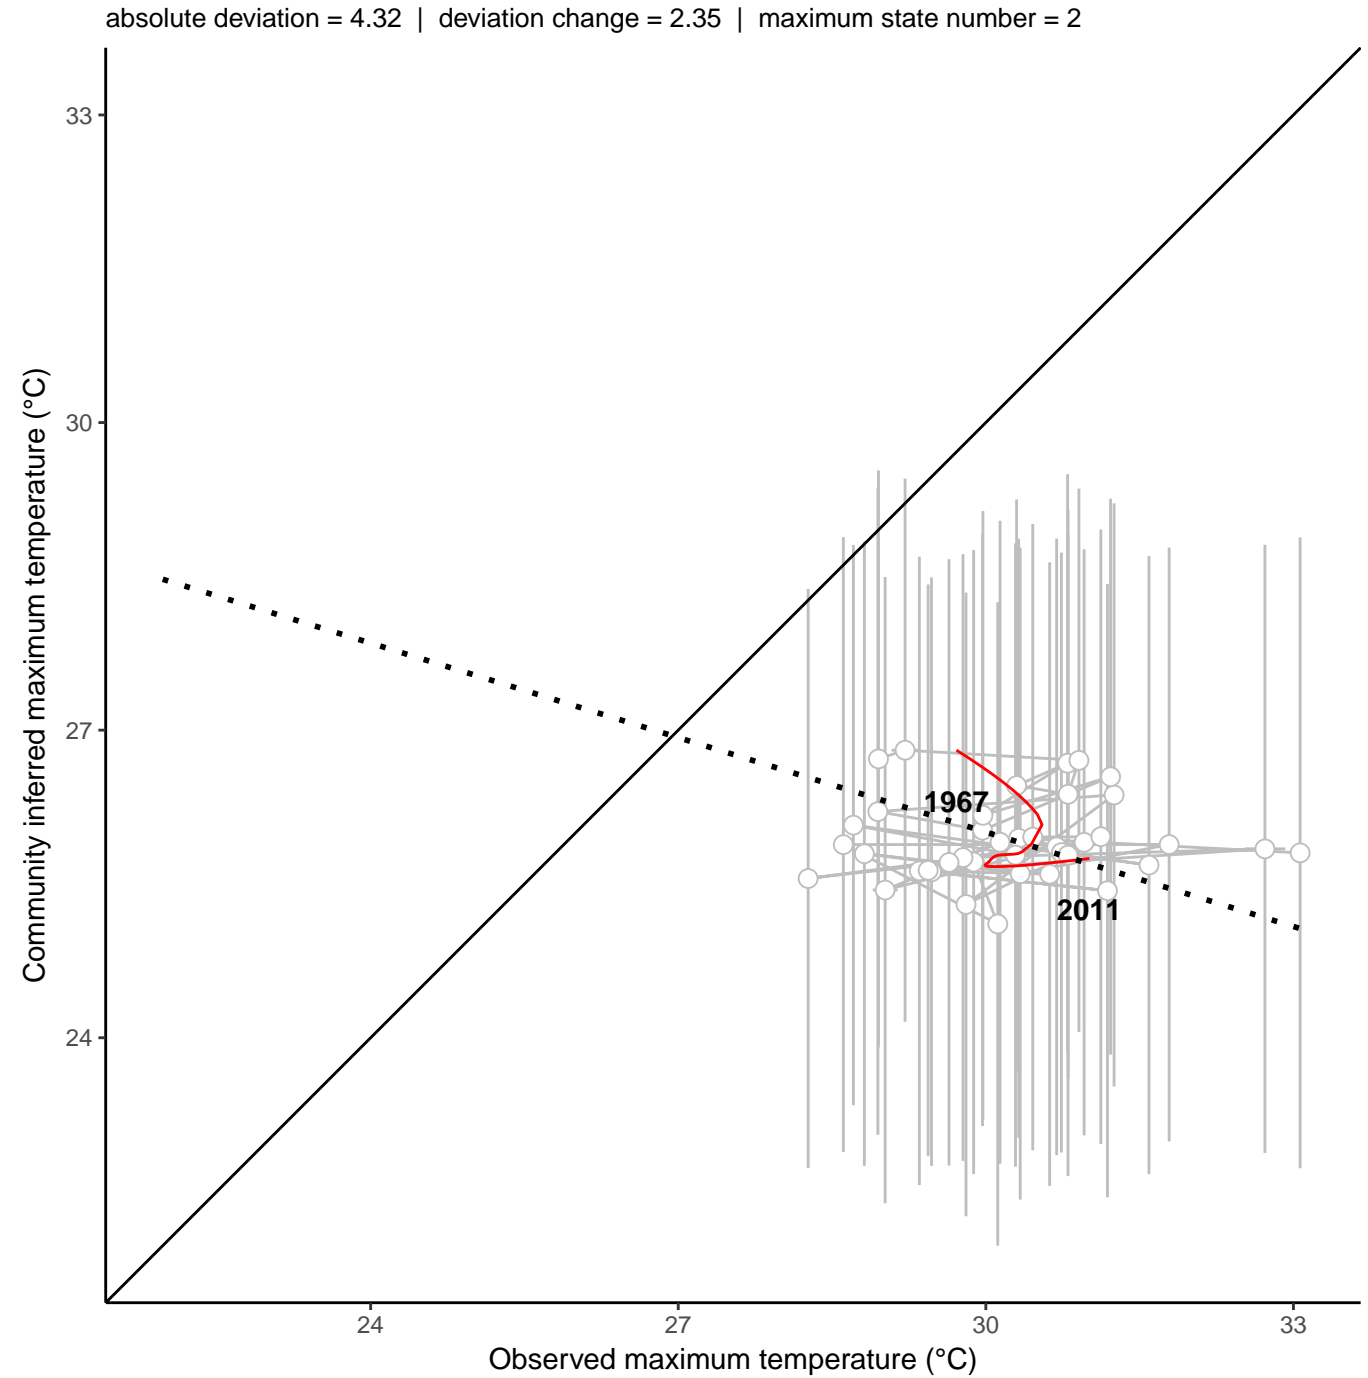

site : 840\_7\_20

absolute deviation = 2.79 | deviation change = 1 | maximum state number = 1

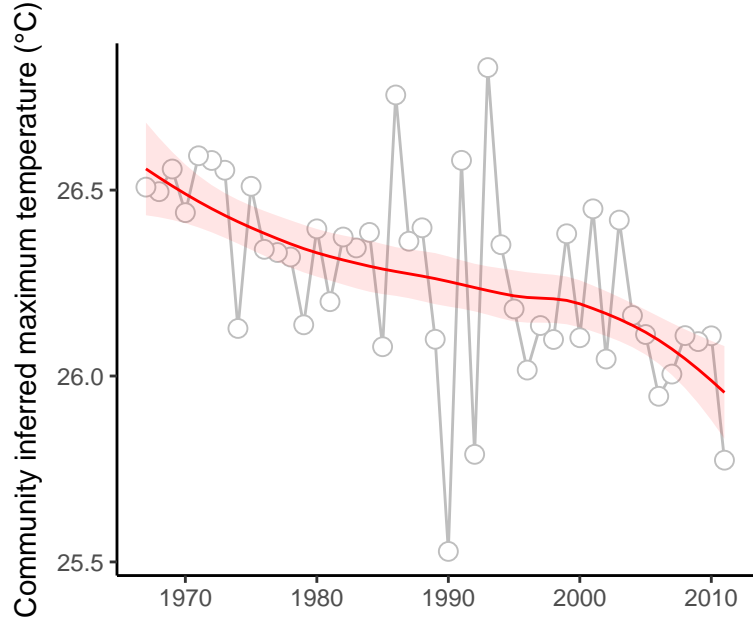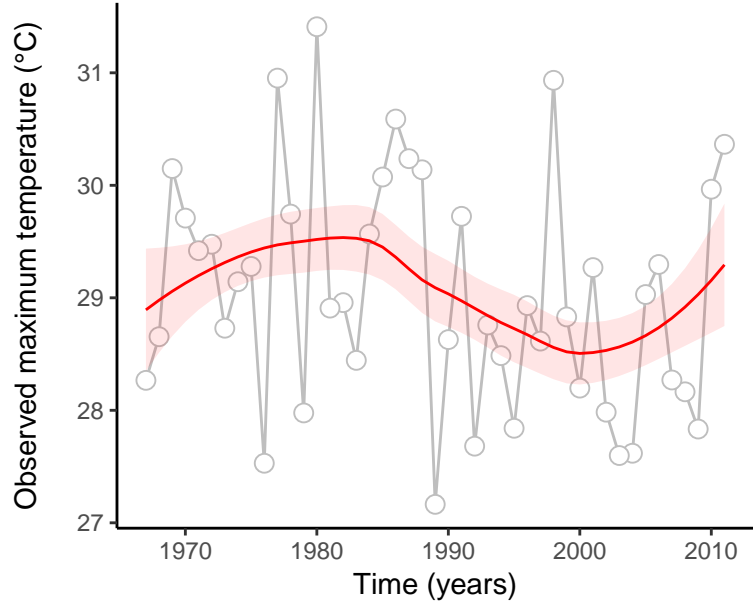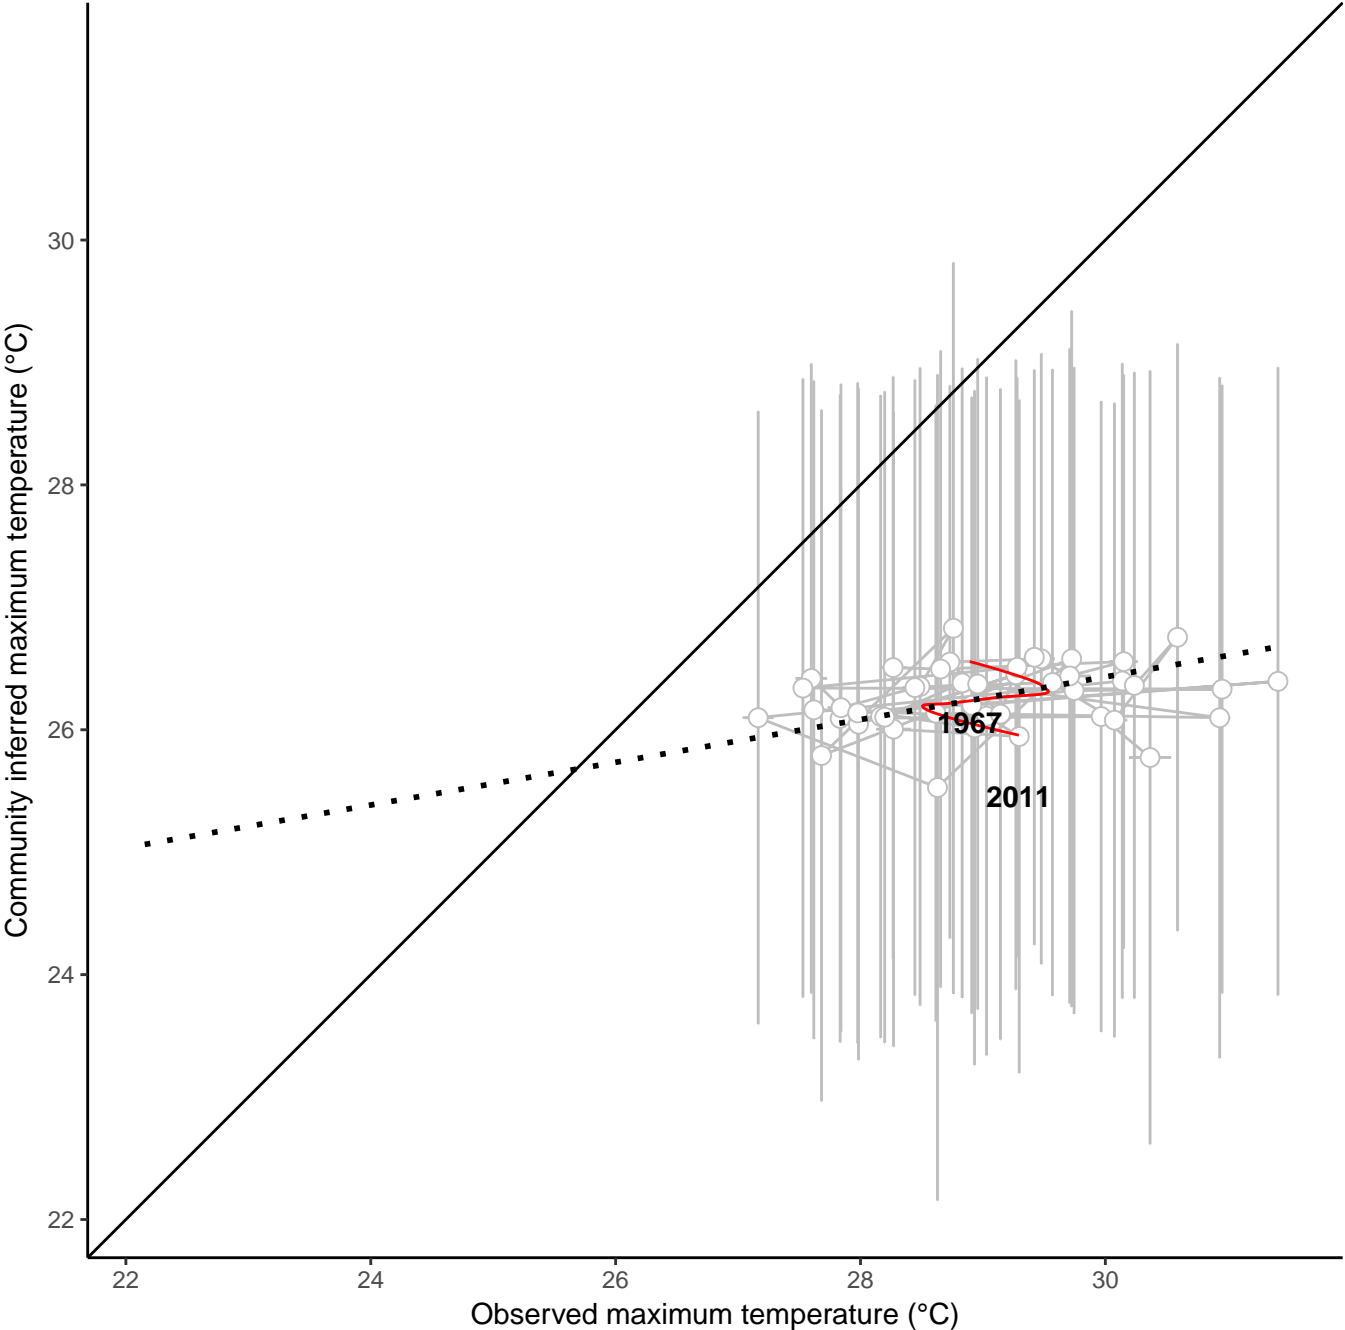

site : 840\_83\_29

absolute deviation = 5.55 | deviation change = 1.84 | maximum state number = 1

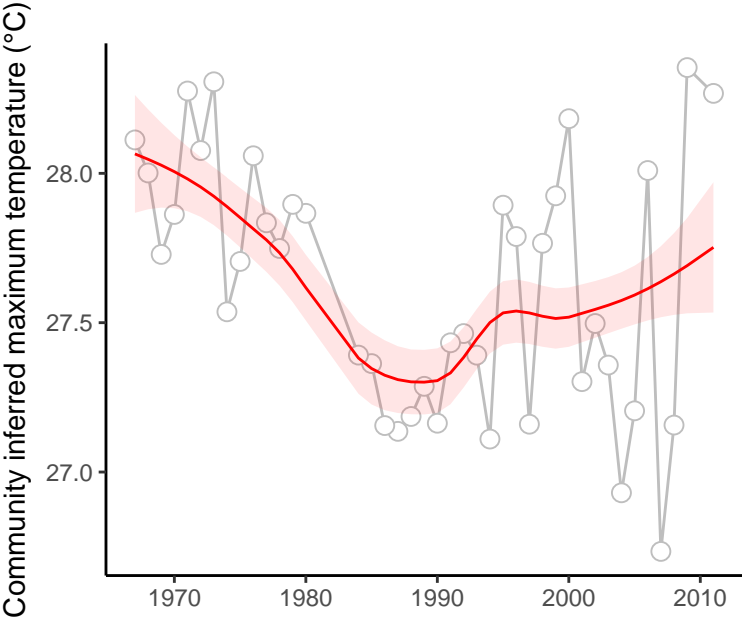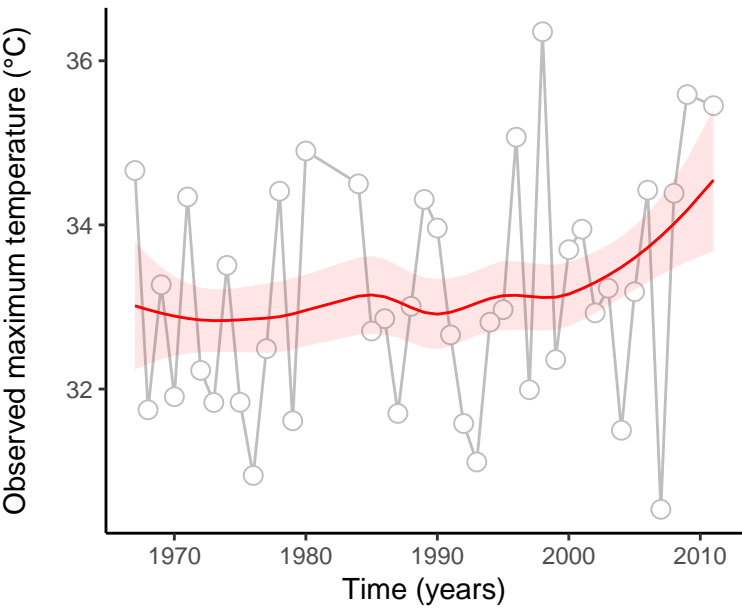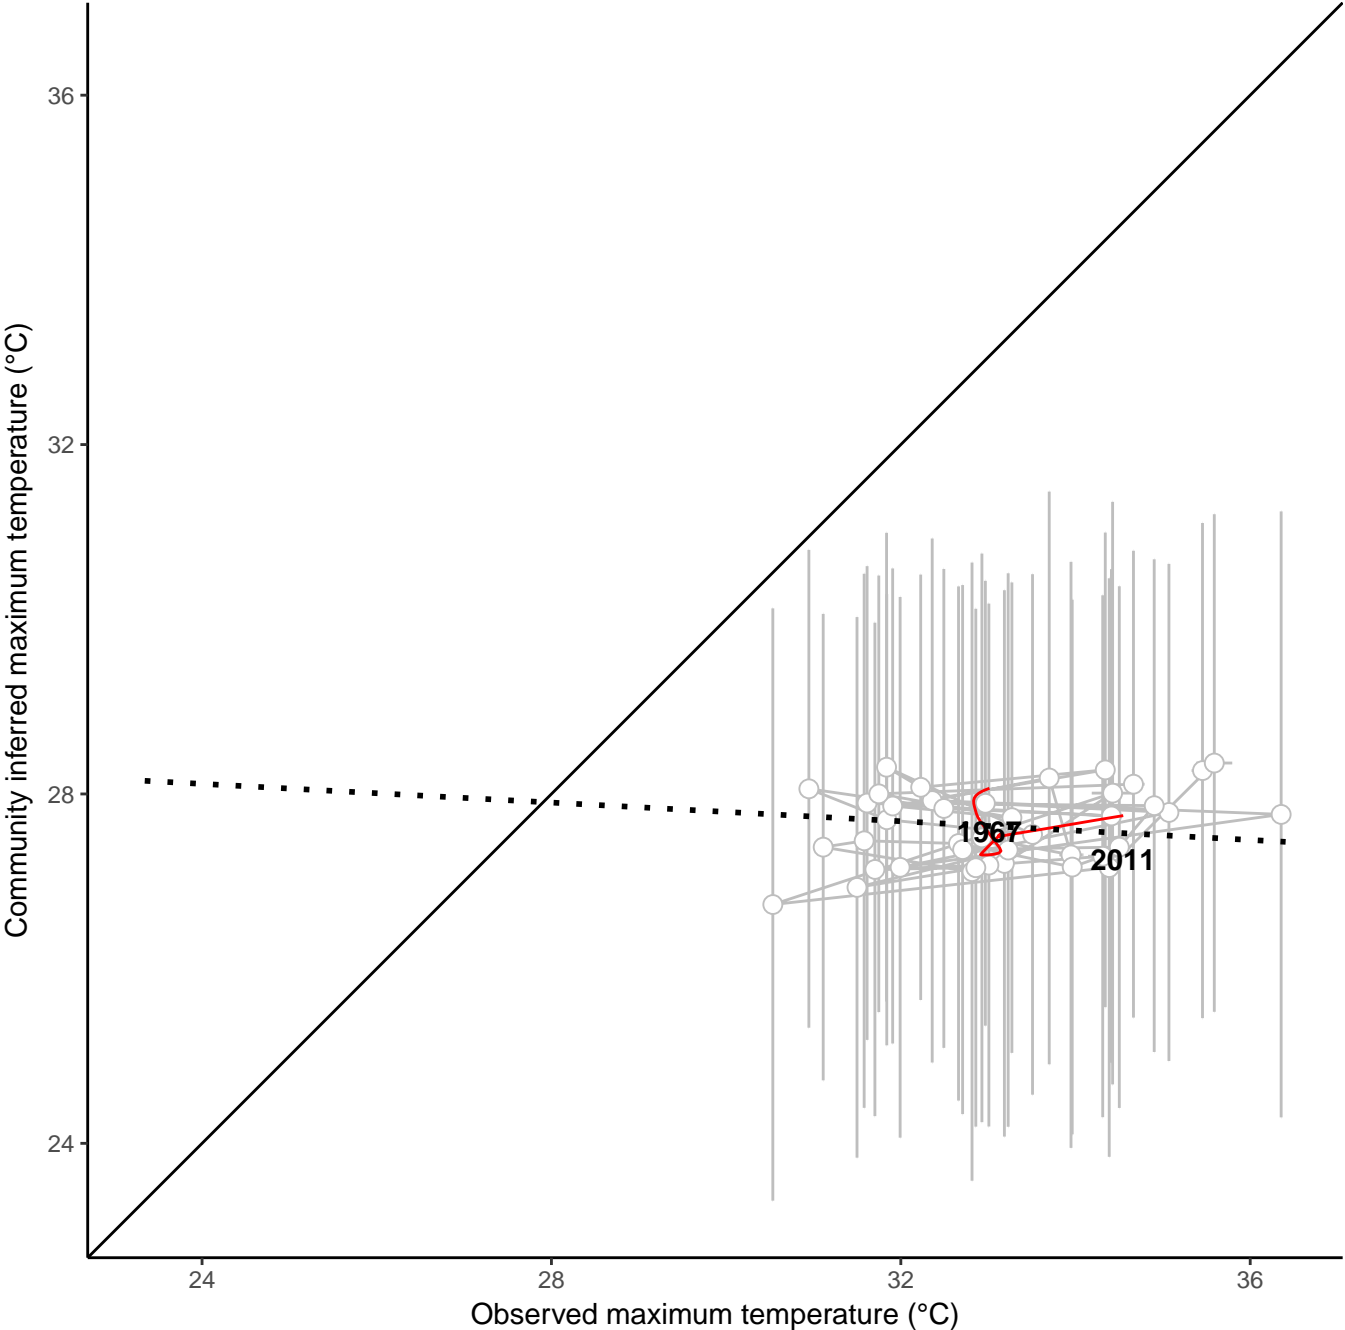

site : 840\_88\_7

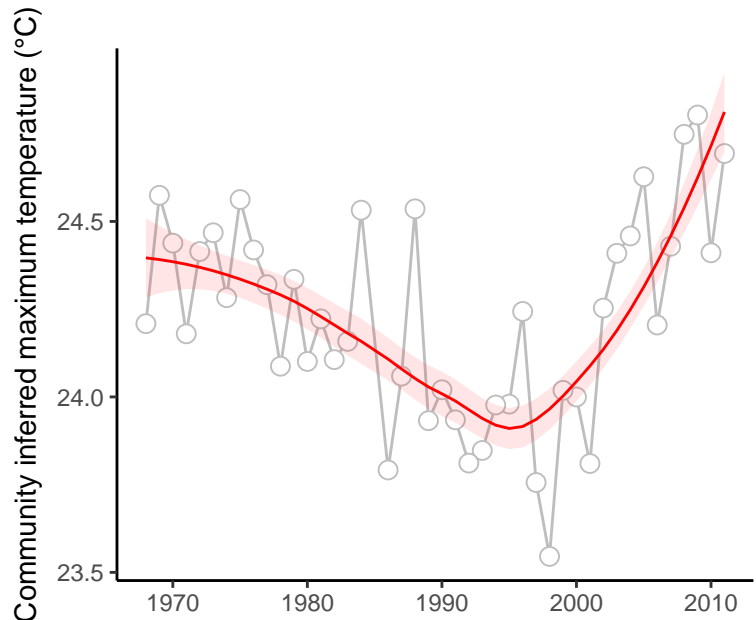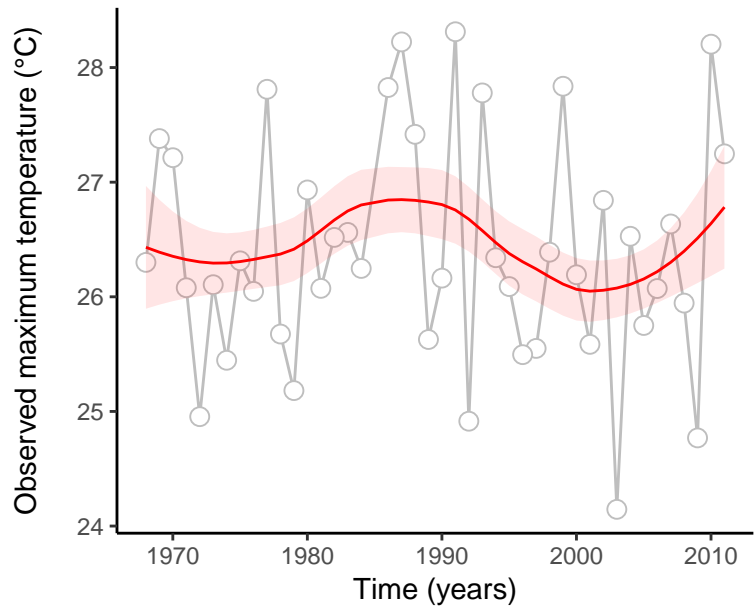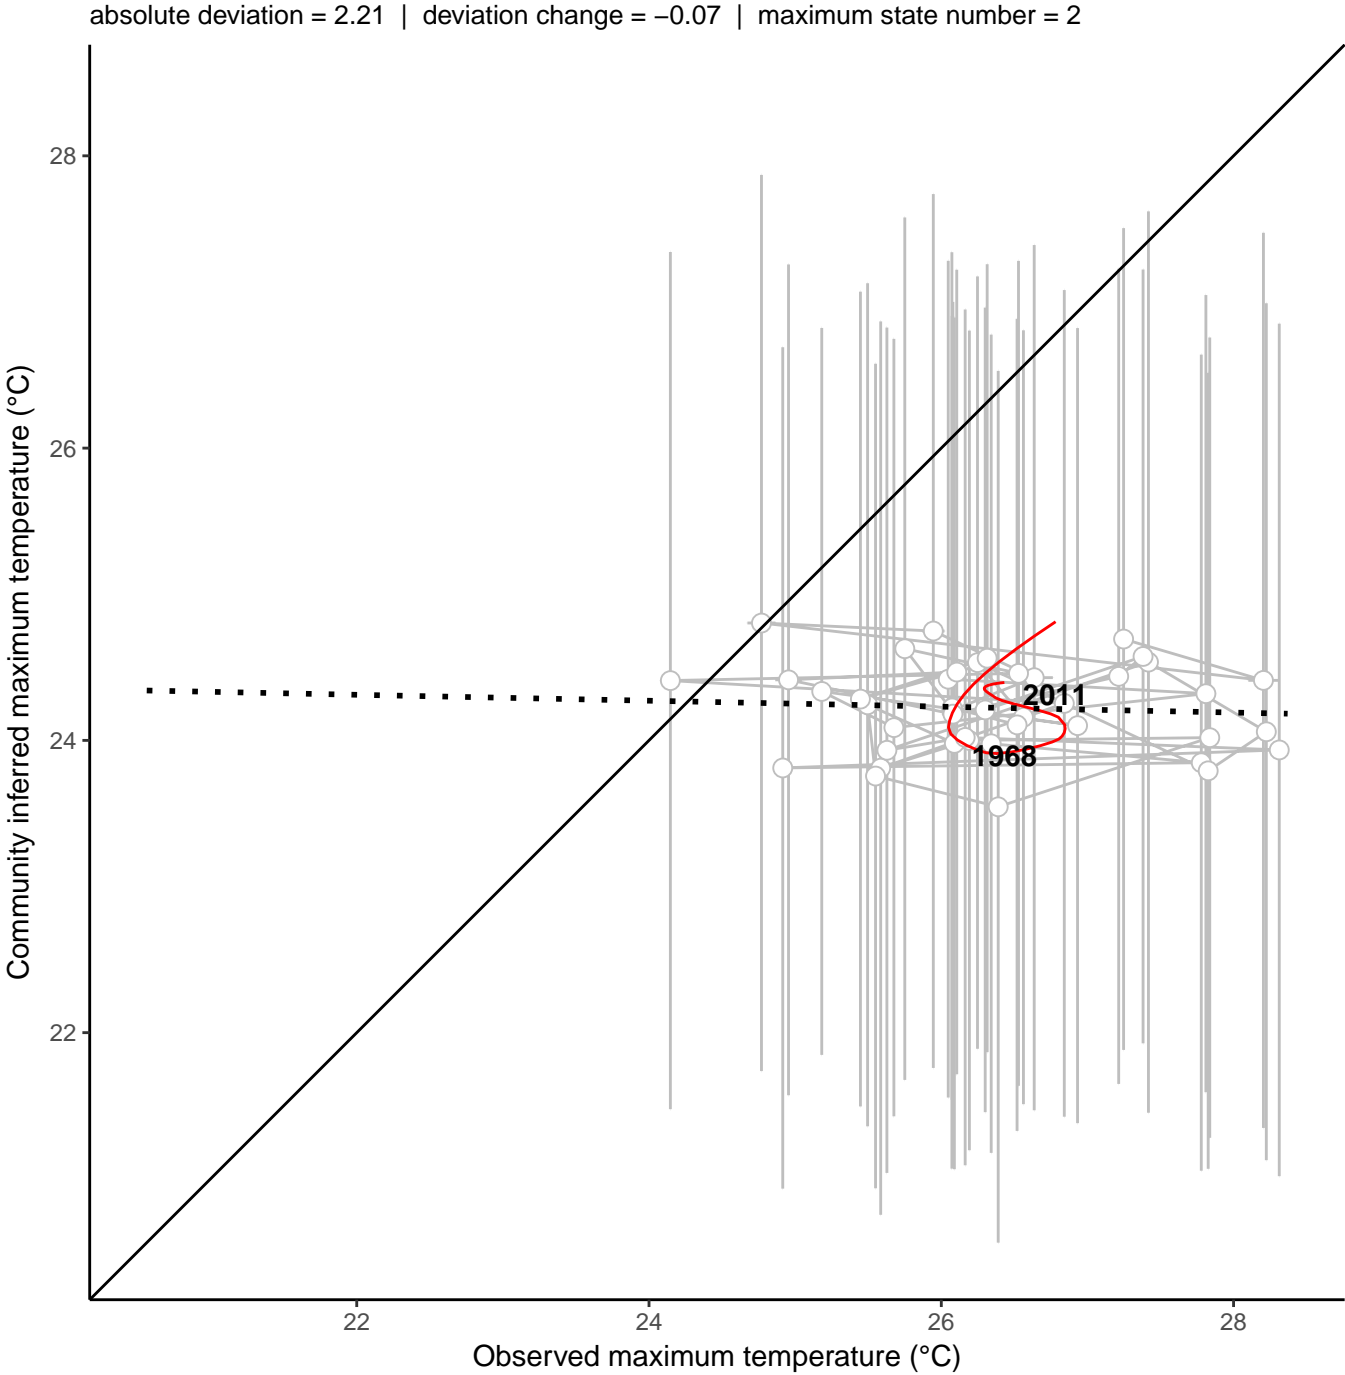

site : 840\_90\_44

absolute deviation = 1.01 | deviation change = -0.14 | maximum state number = 1

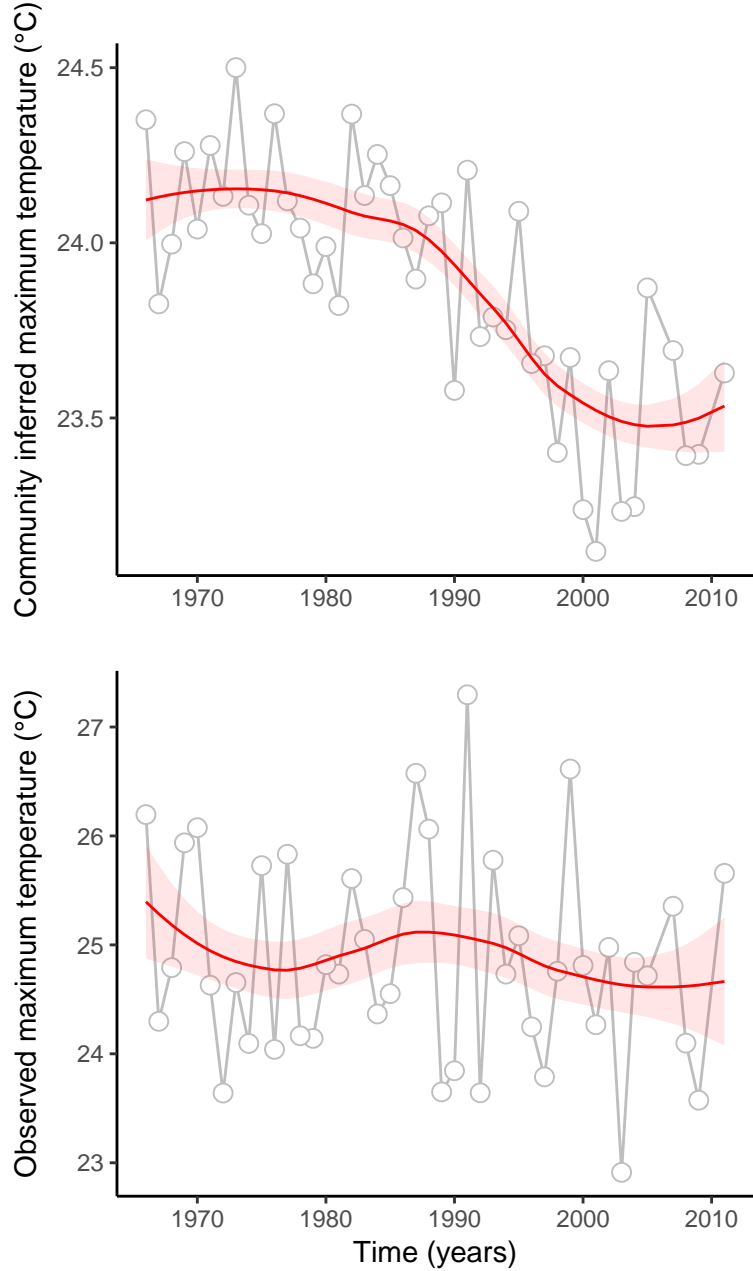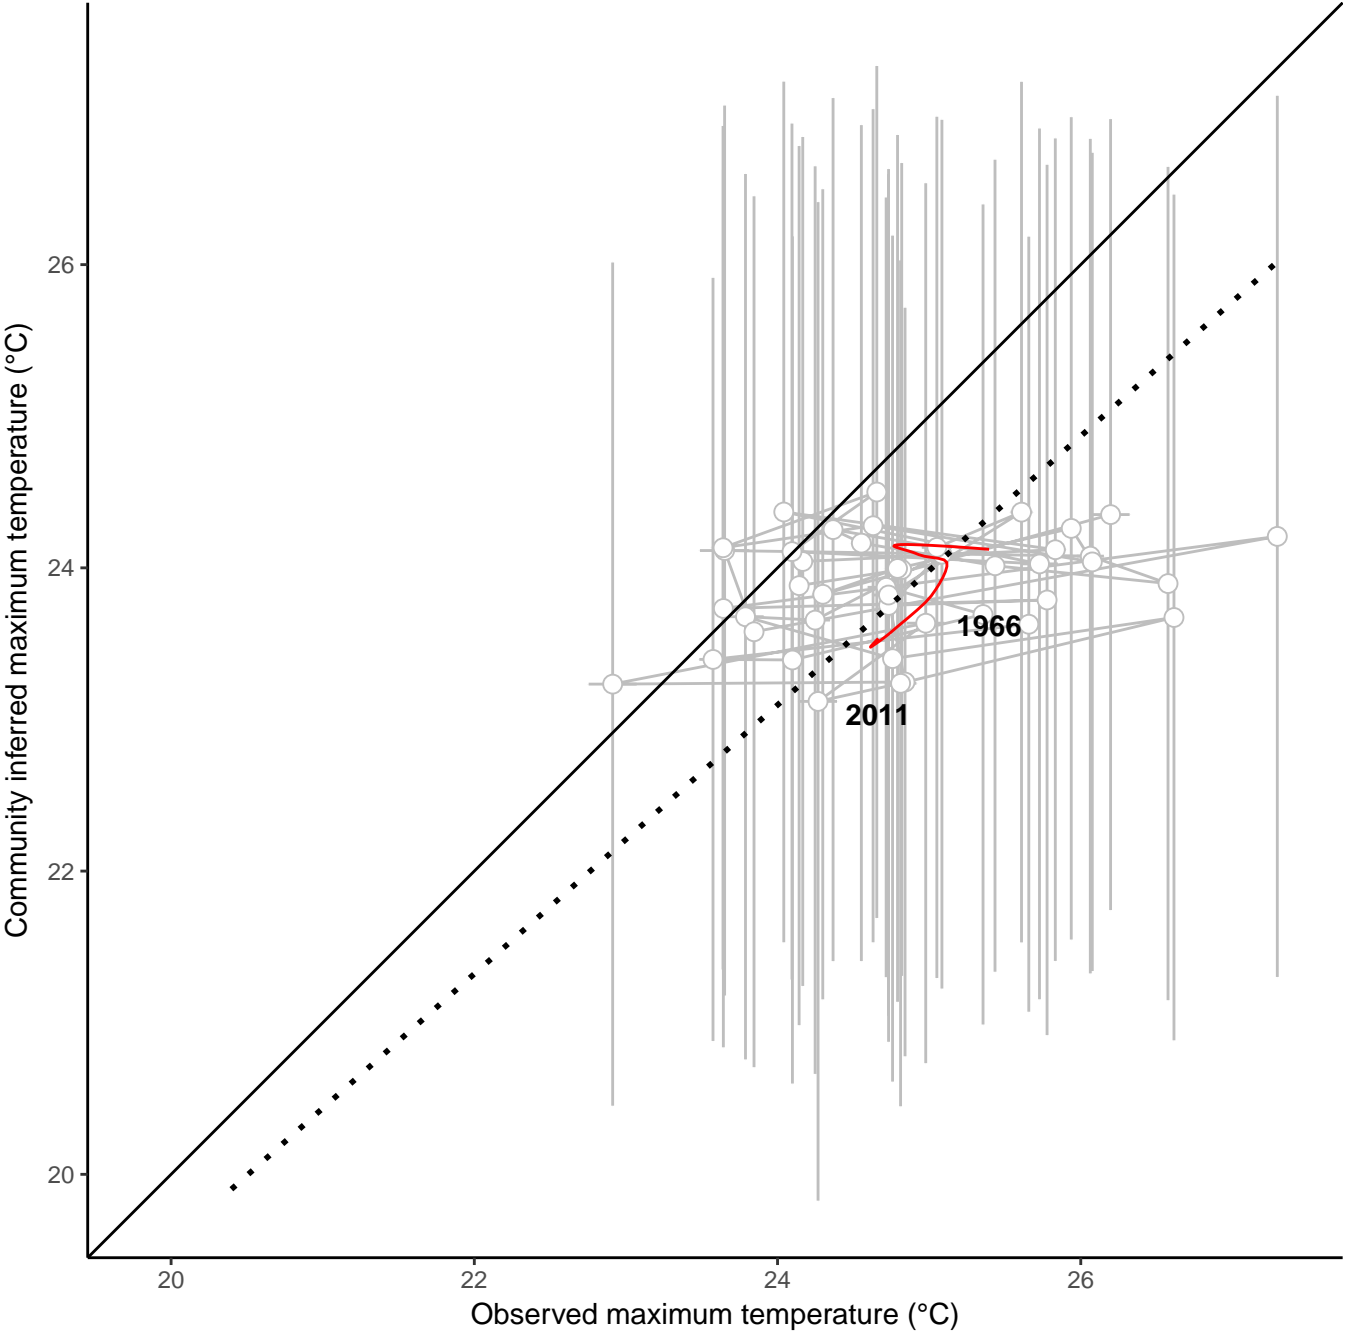

site : 840\_14\_153

absolute deviation = 3.86 | deviation change = -1.52 | maximum state number = 1

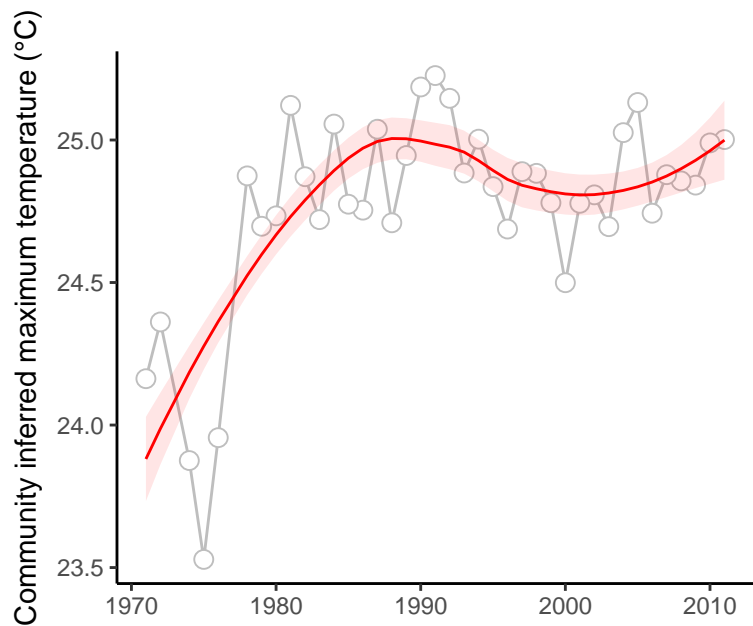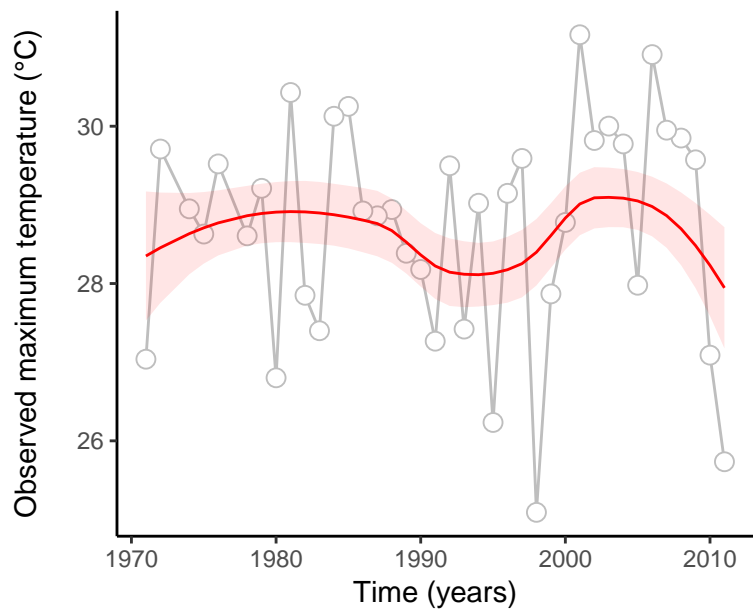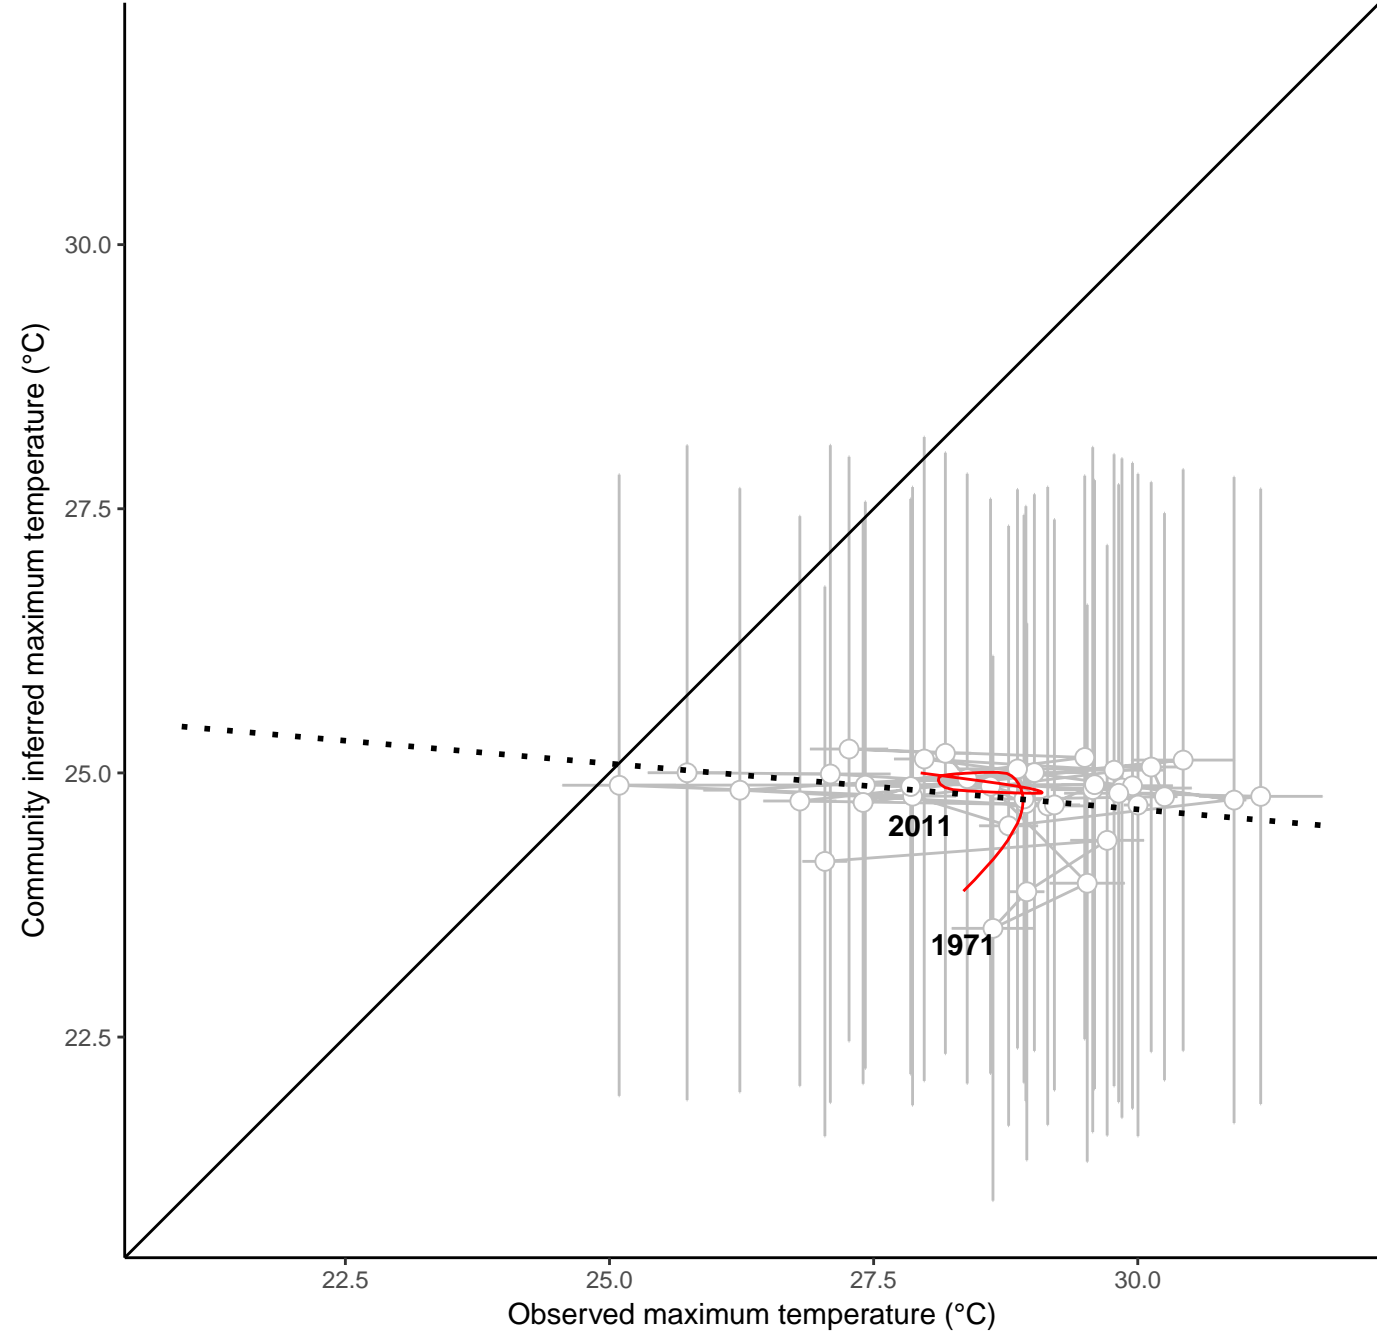

site : 840\_17\_11

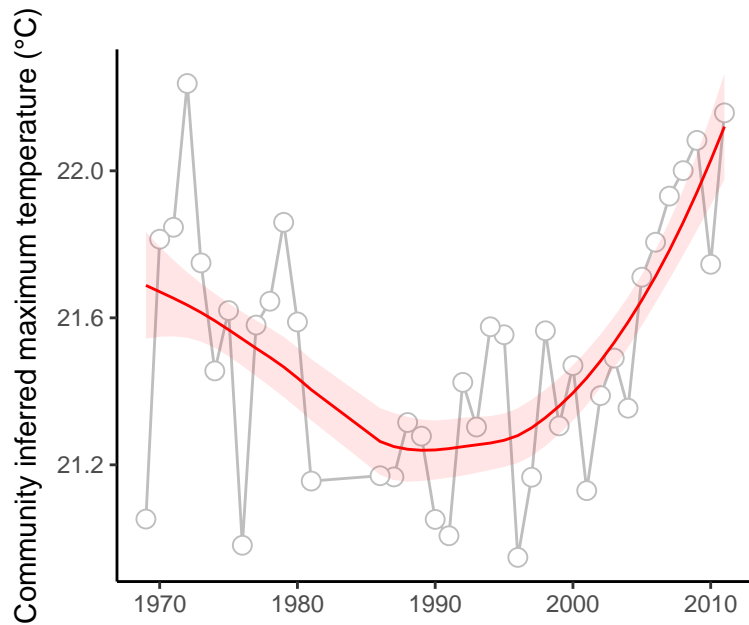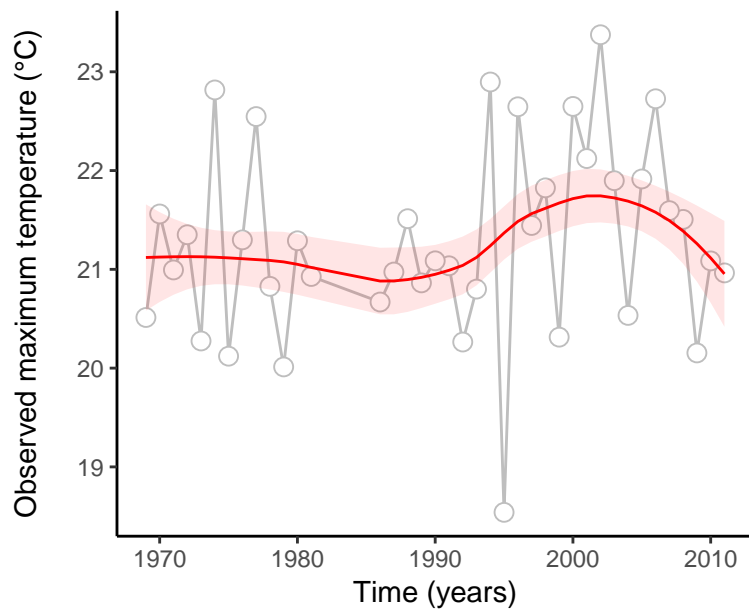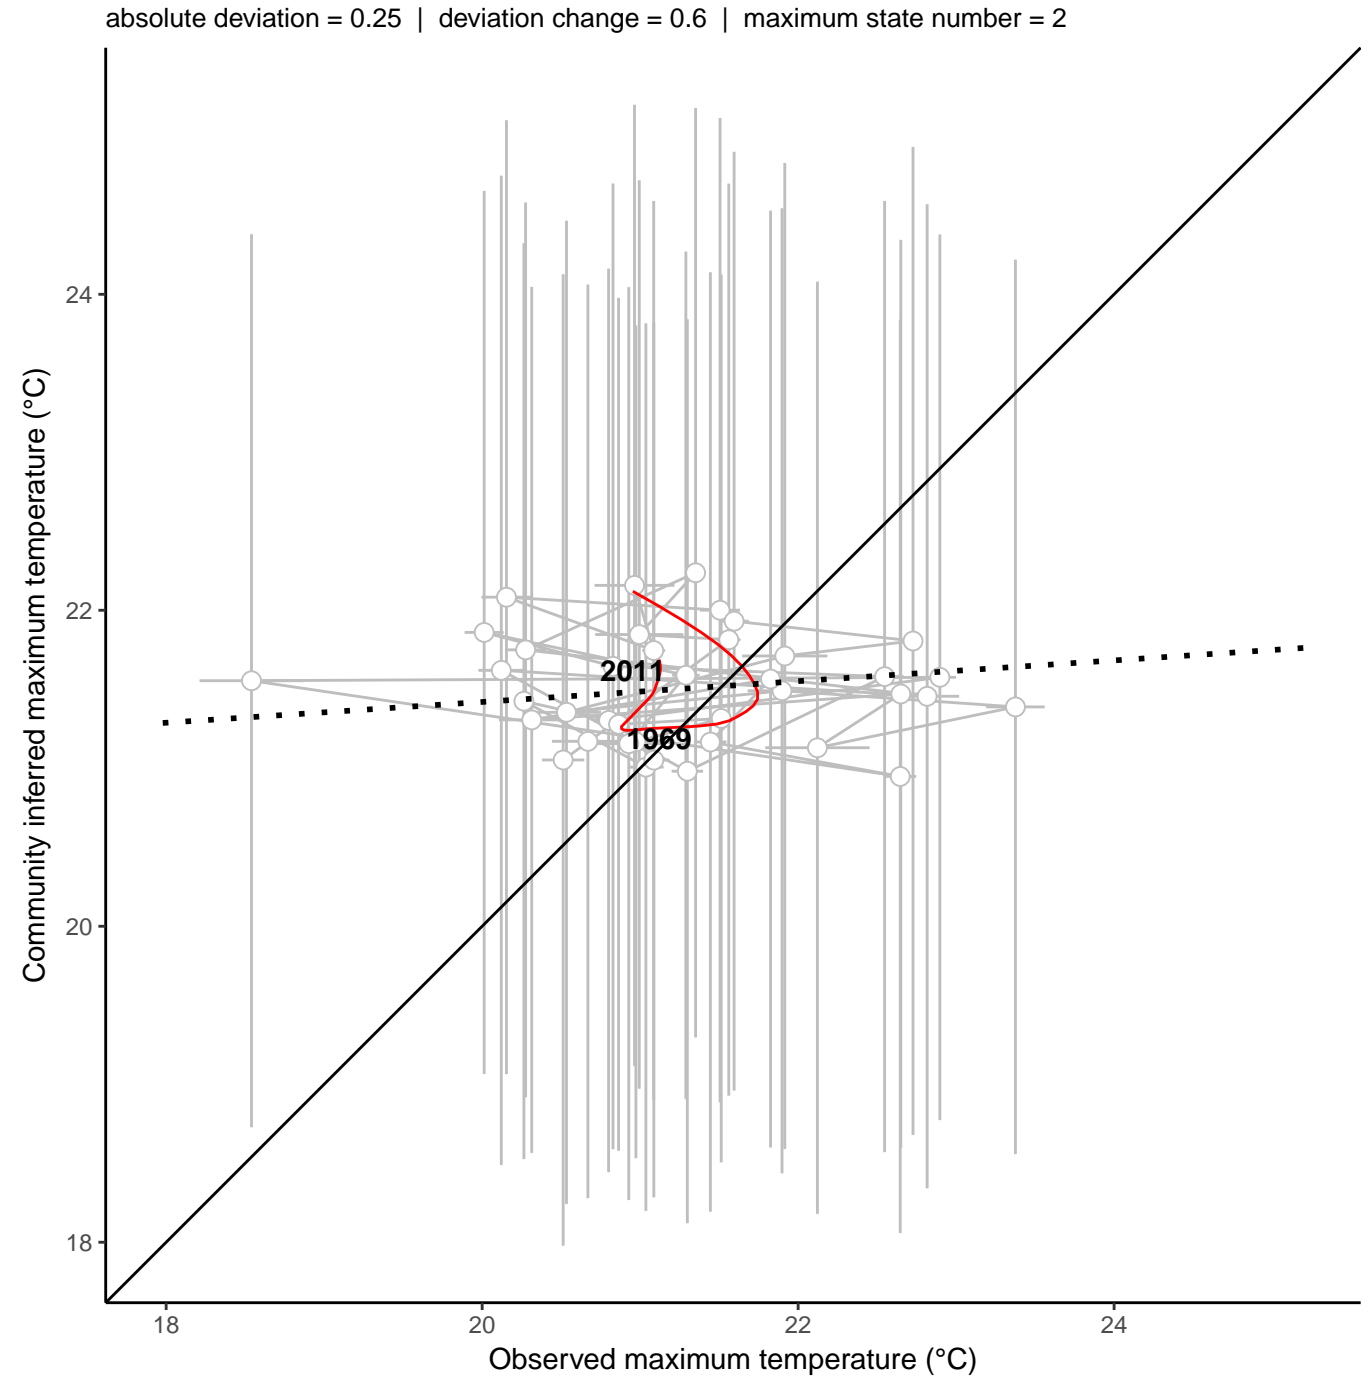



site : 840\_47\_18

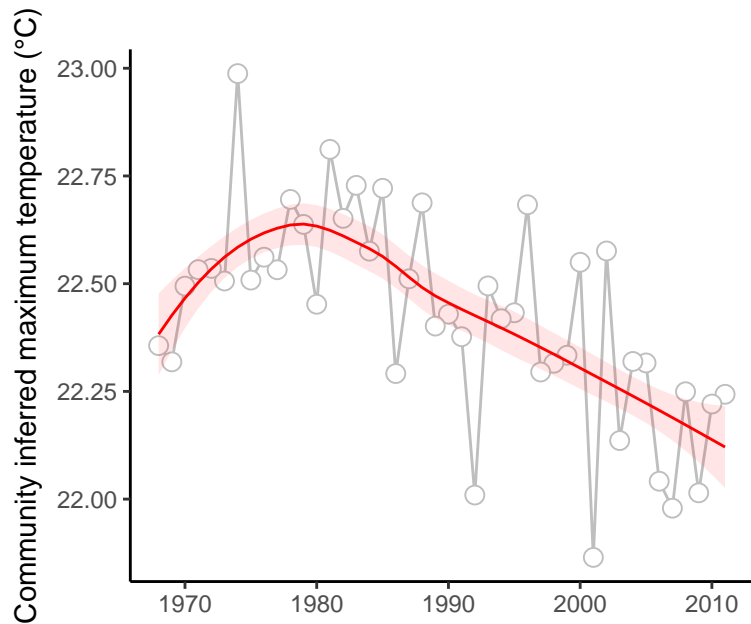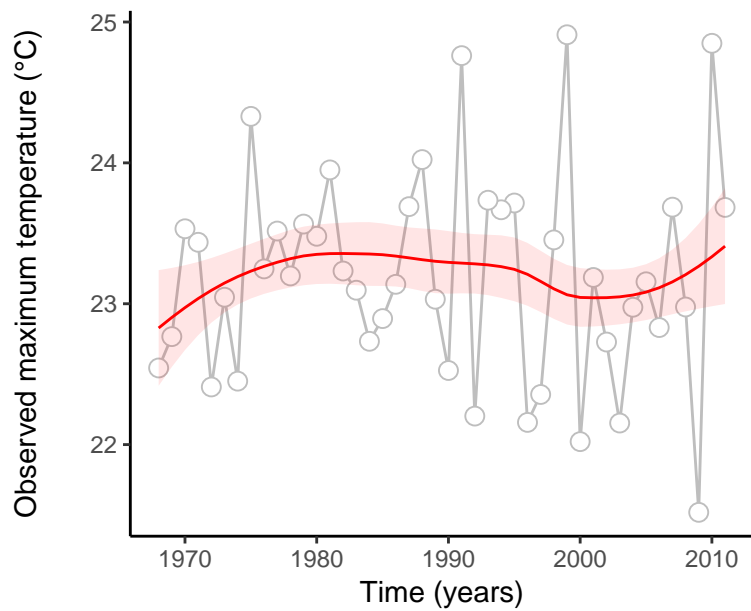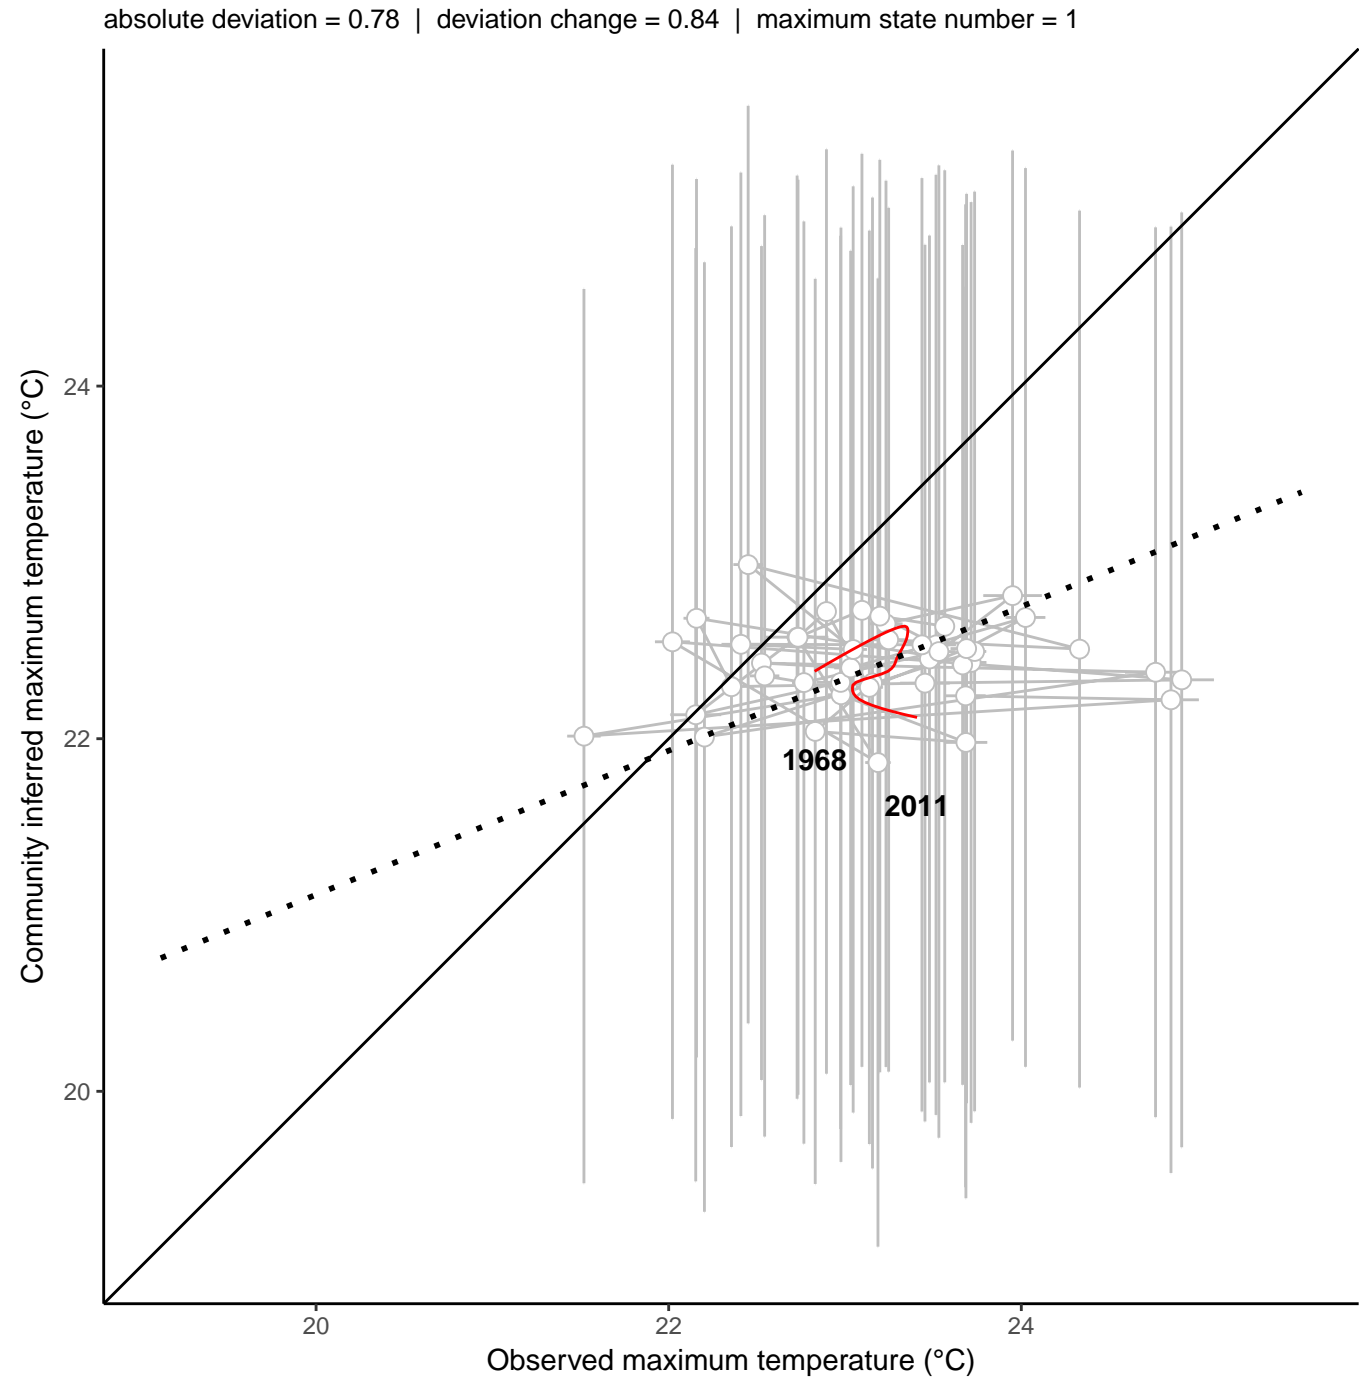

site : 840\_53\_39

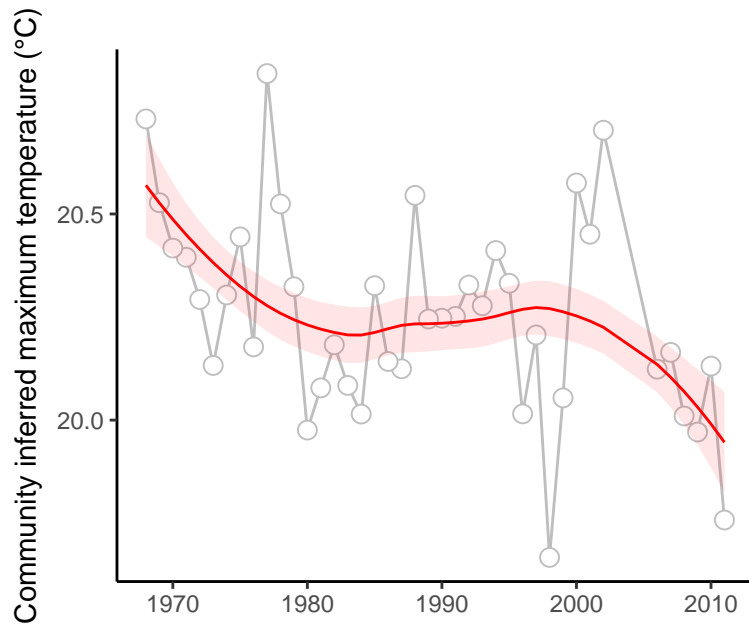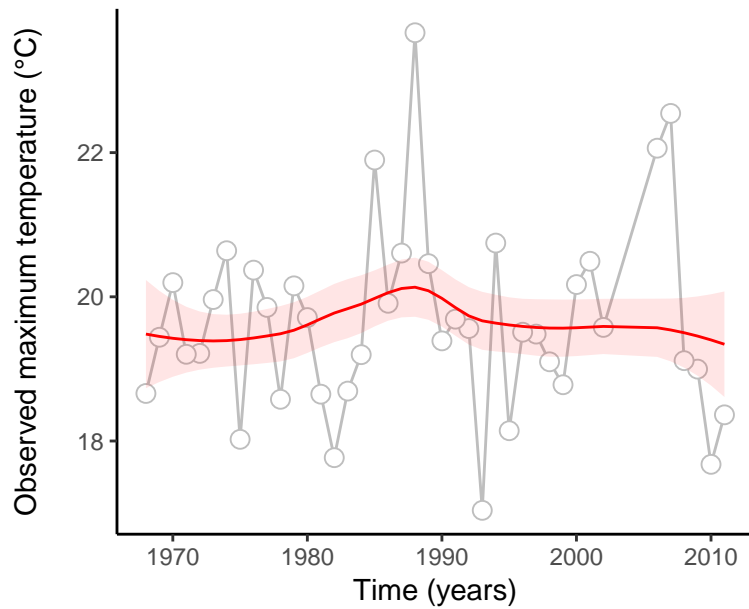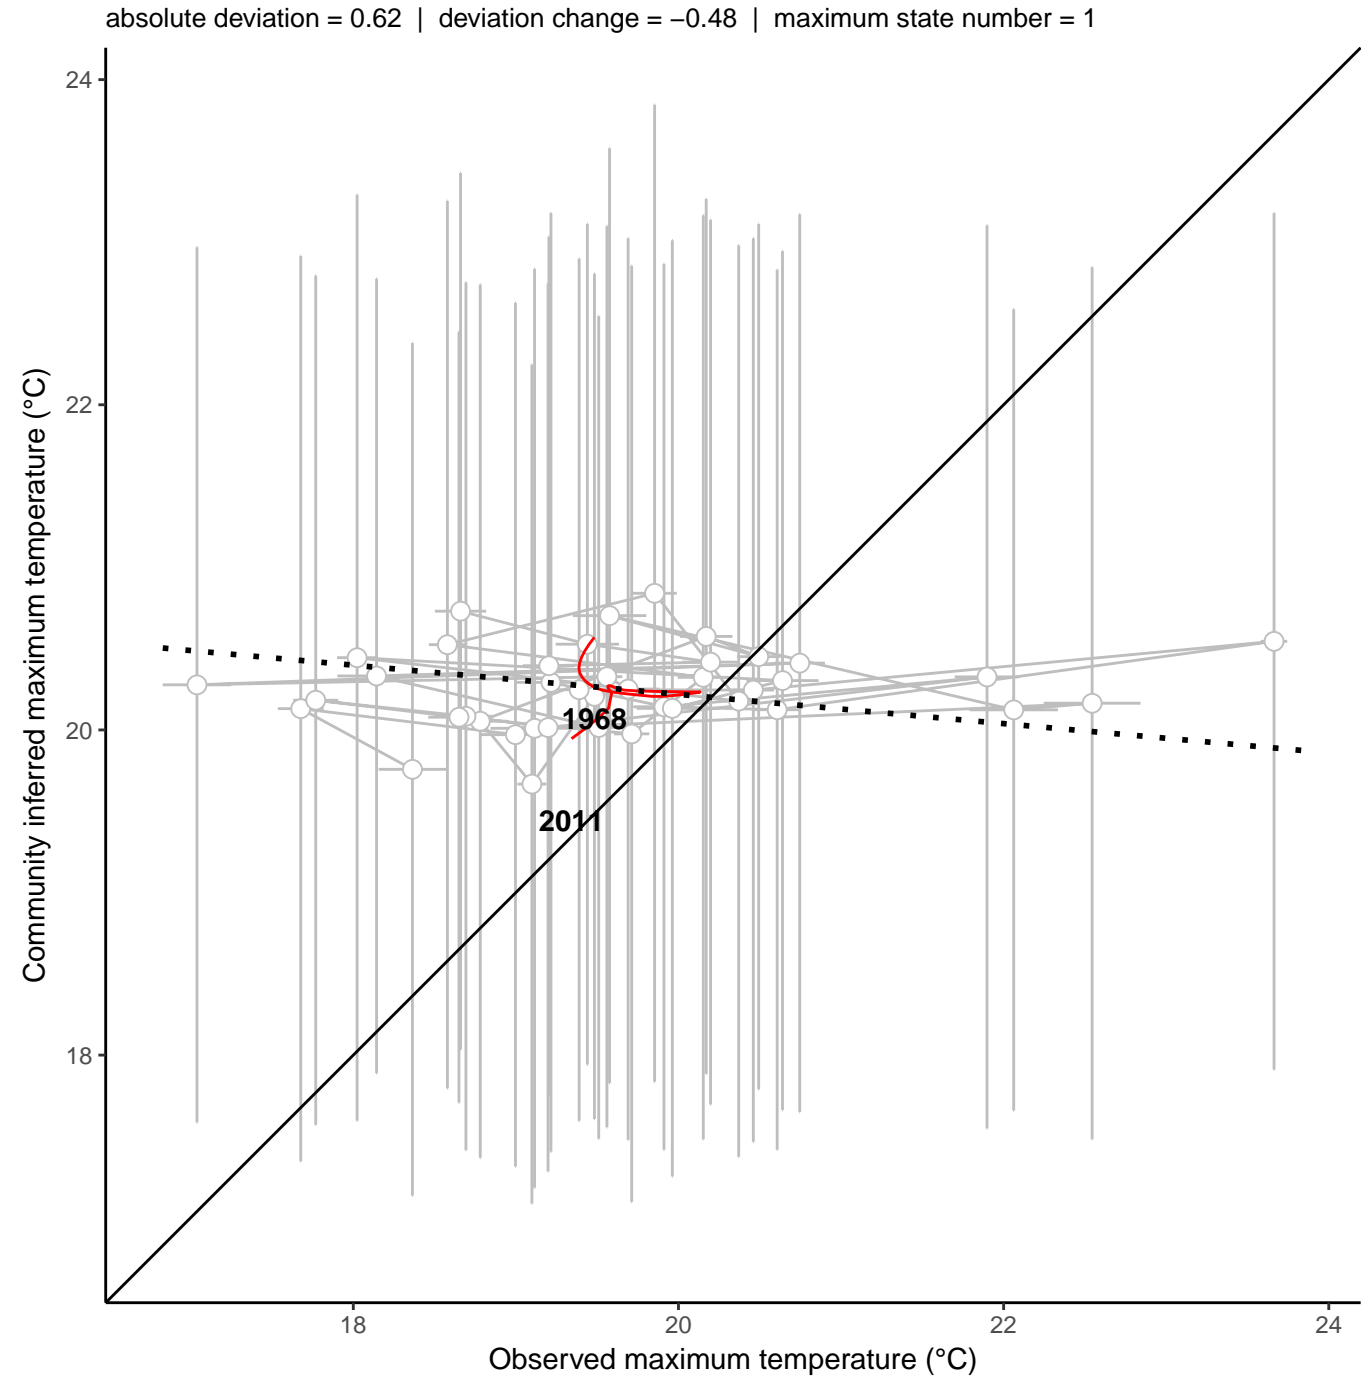

site : 840\_69\_18

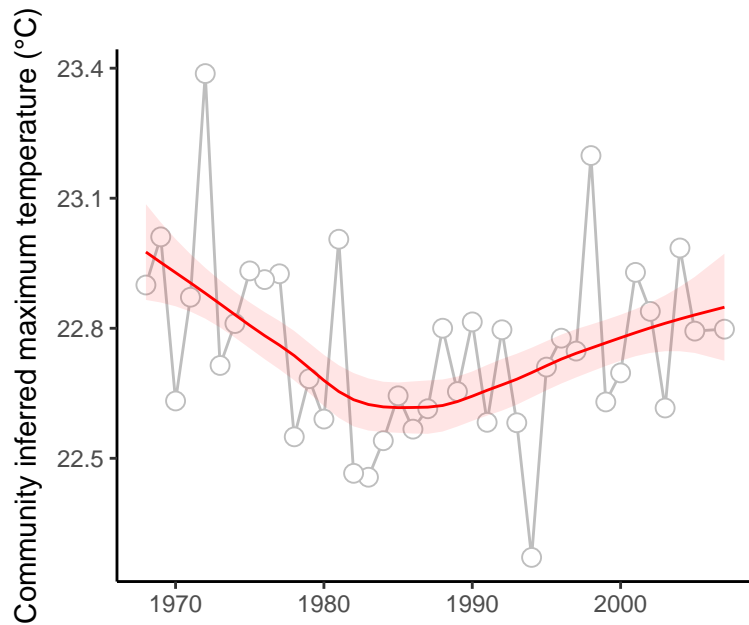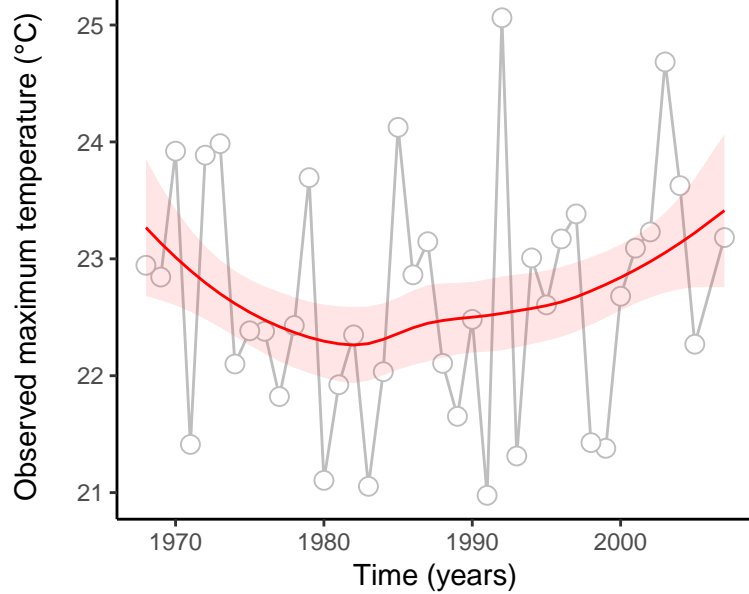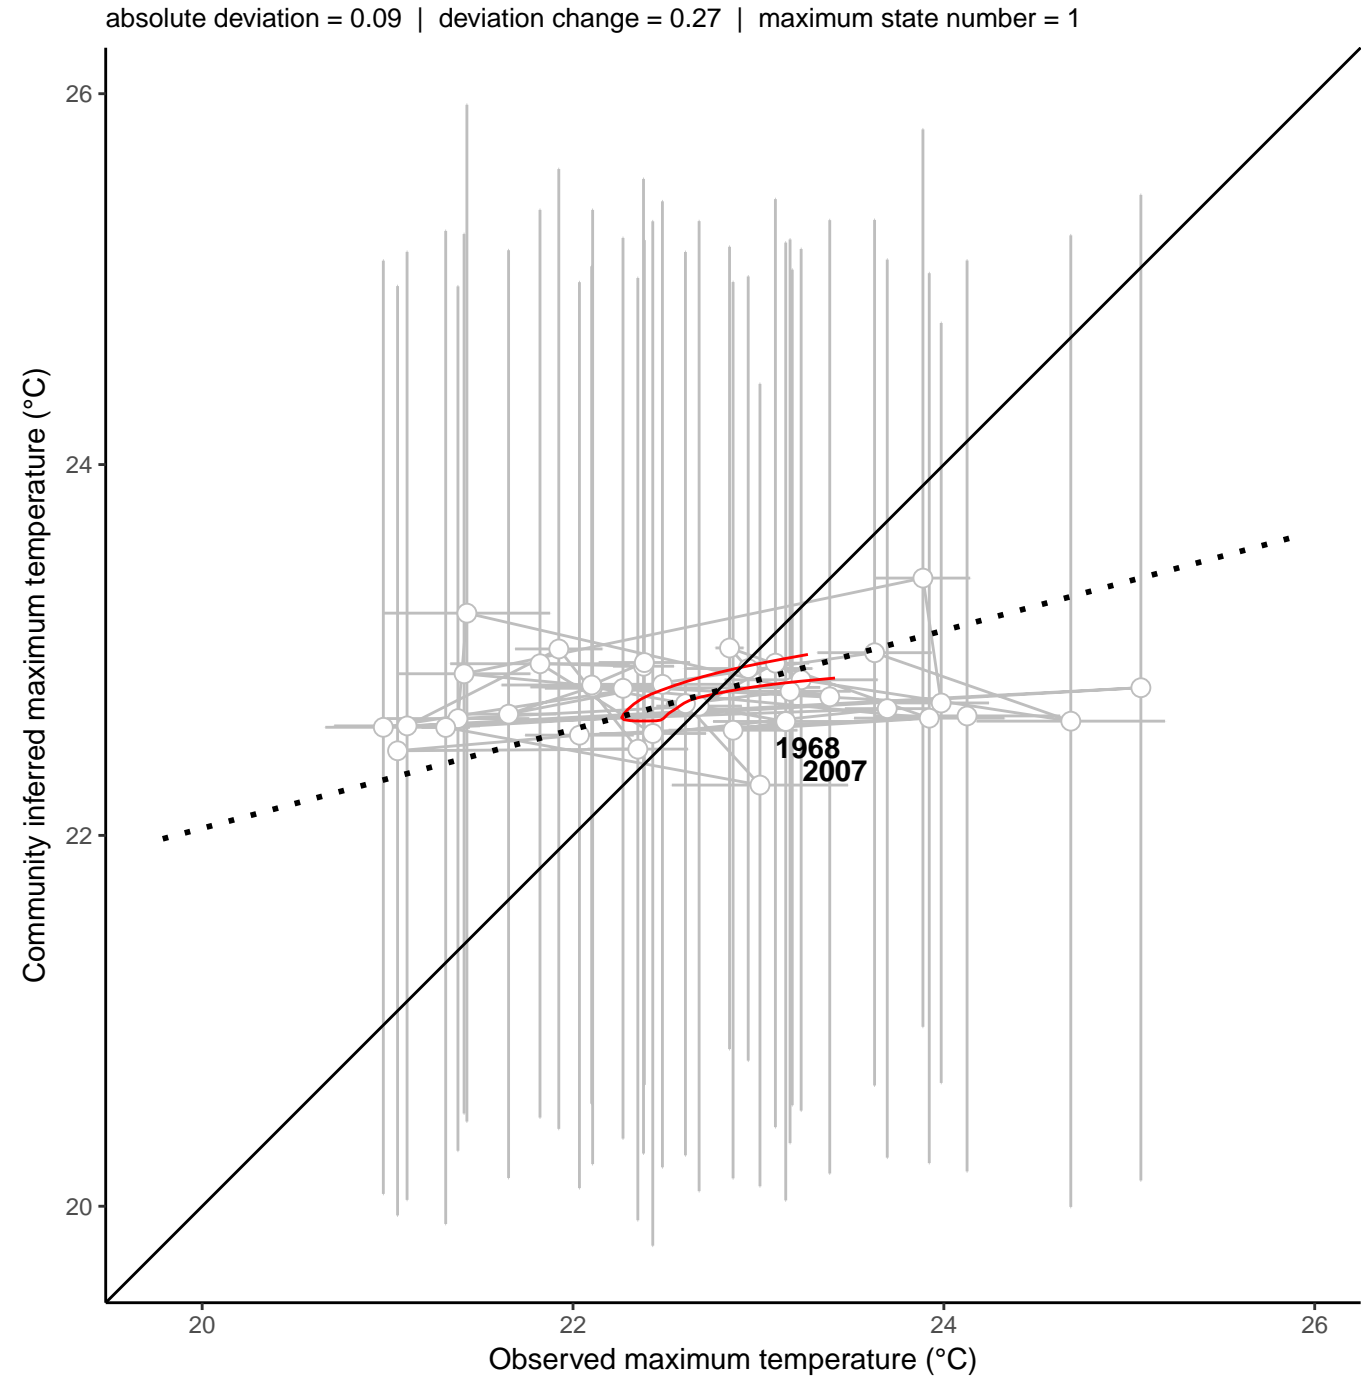

site : 840\_69\_26

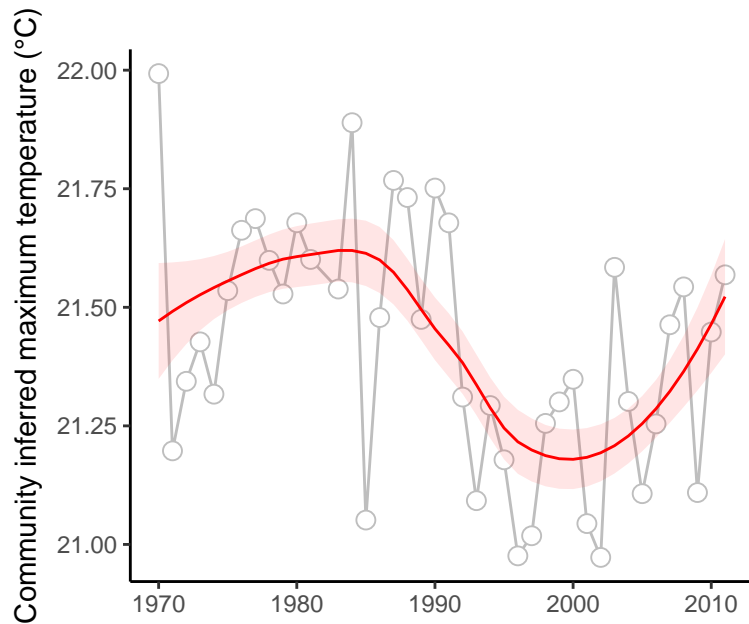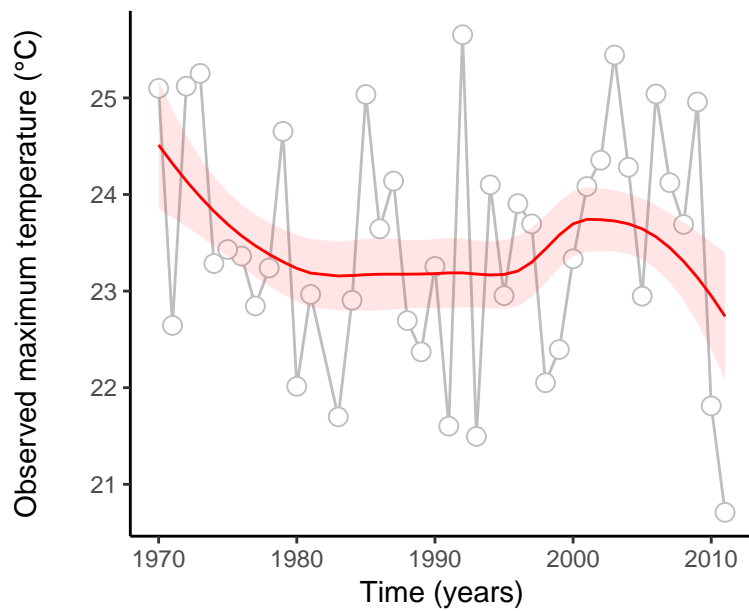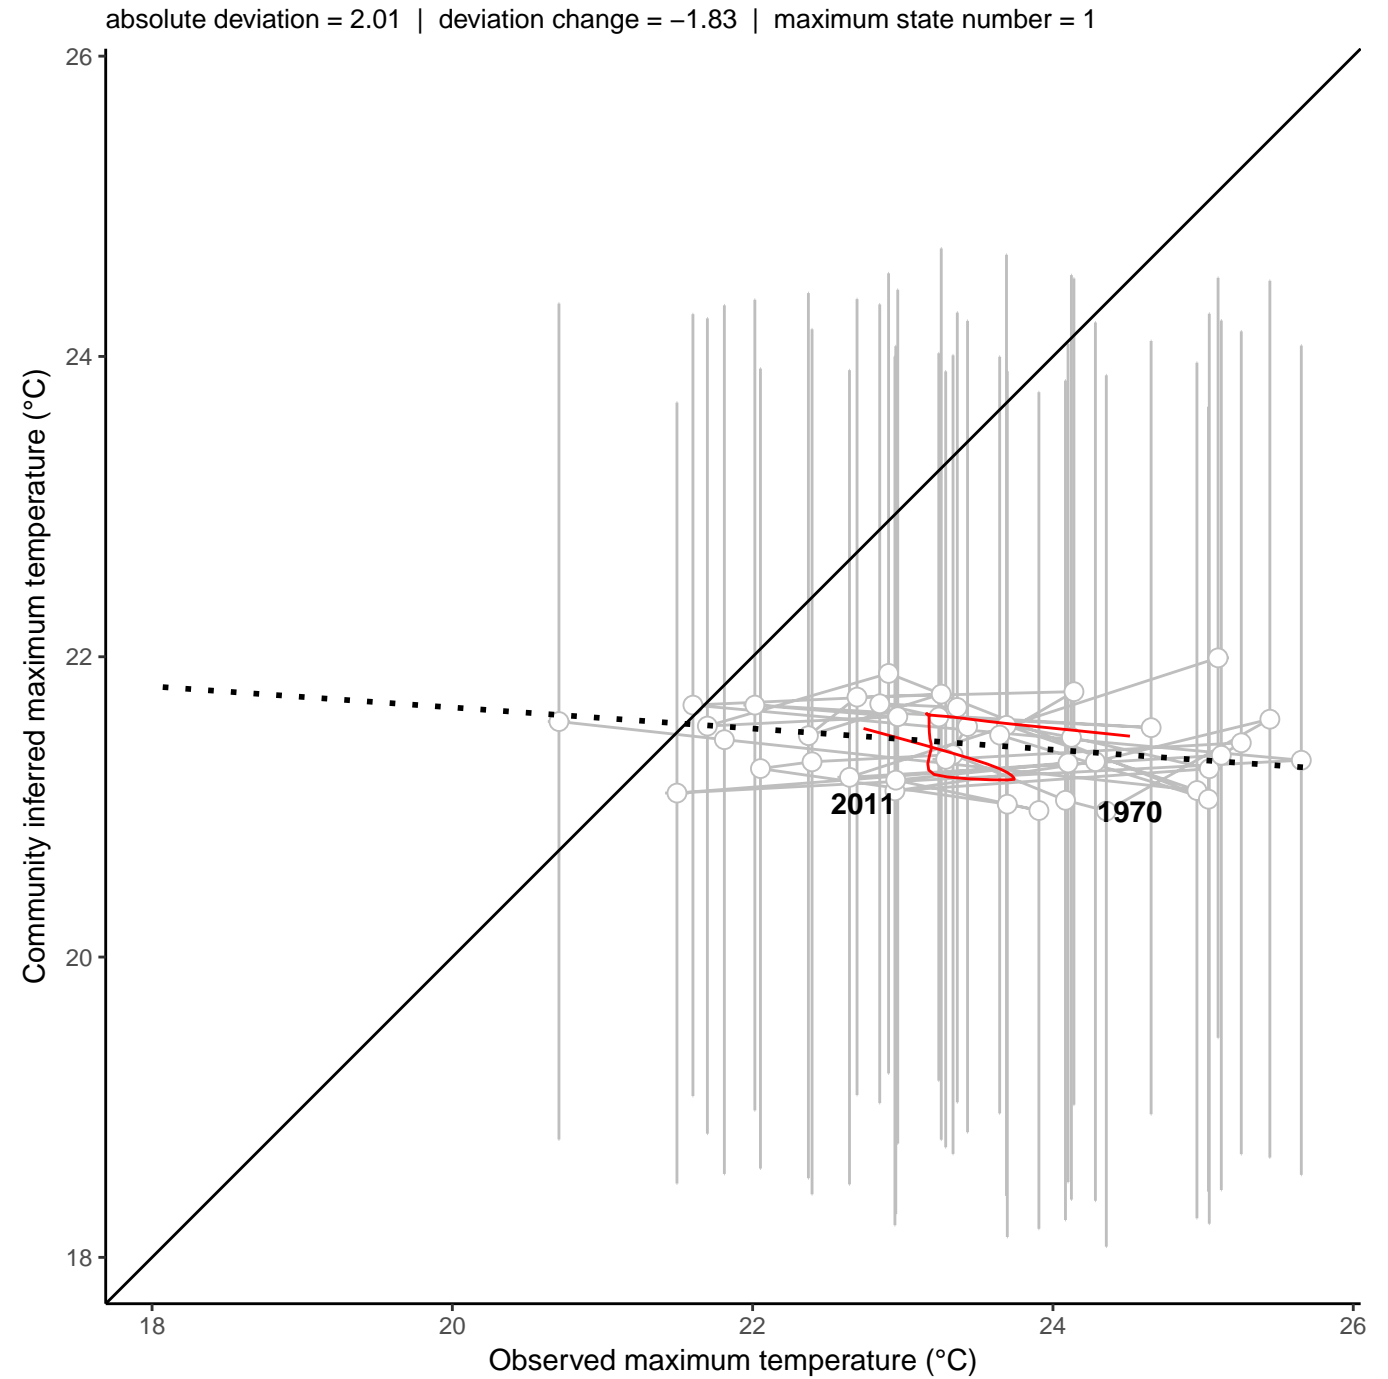

site : 840\_7\_10

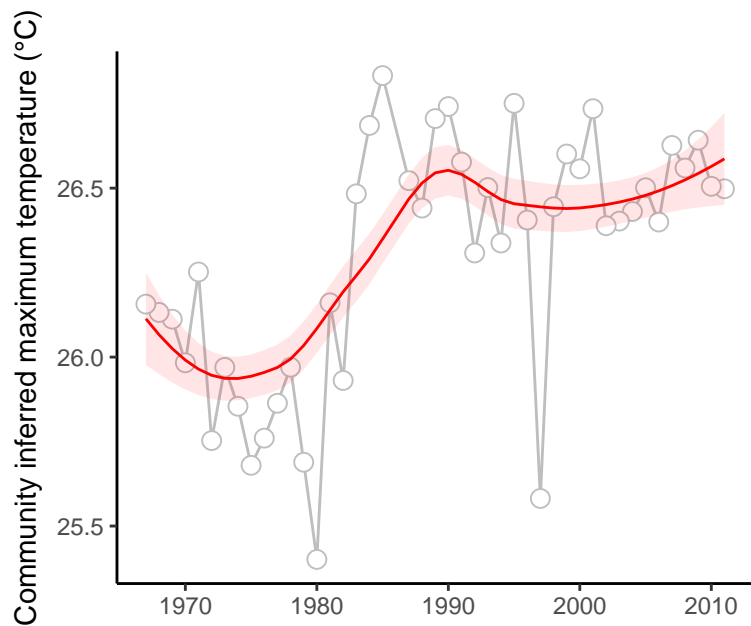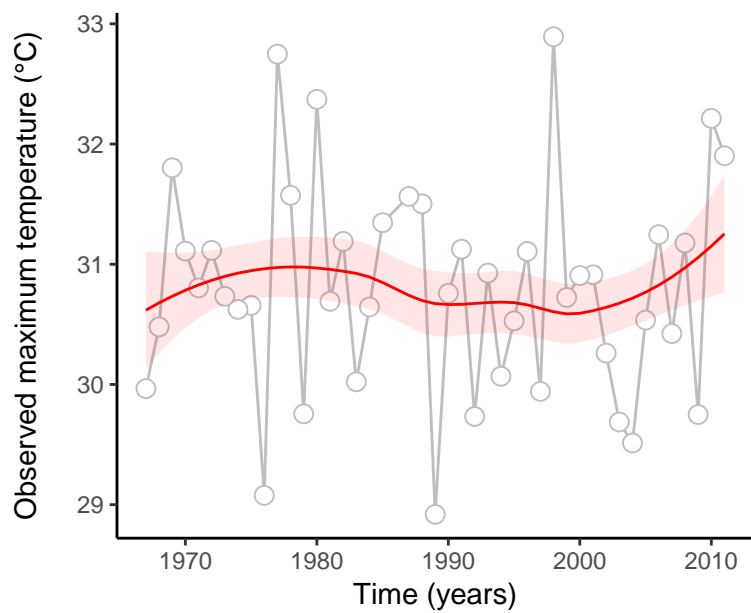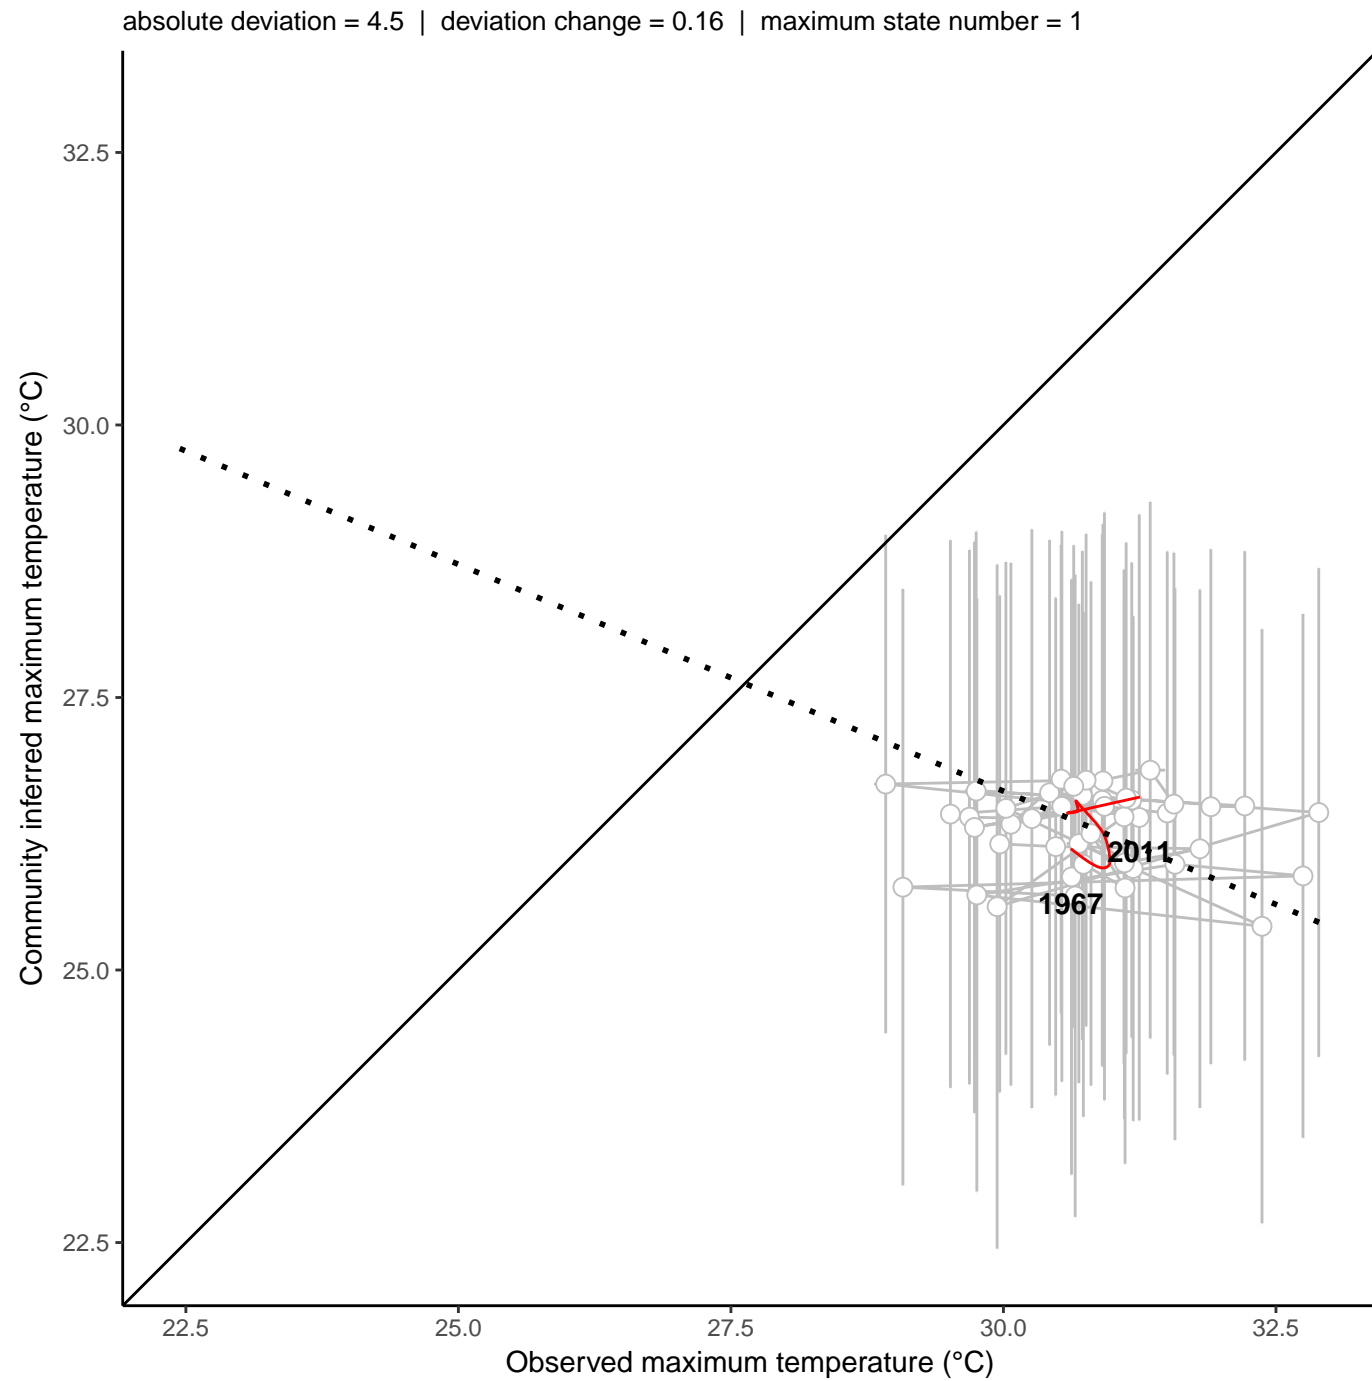

site : 840\_82\_22

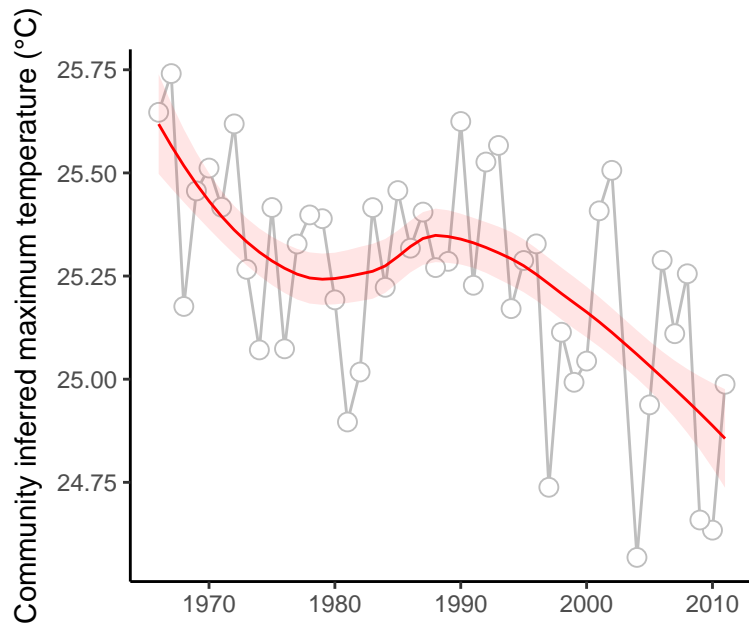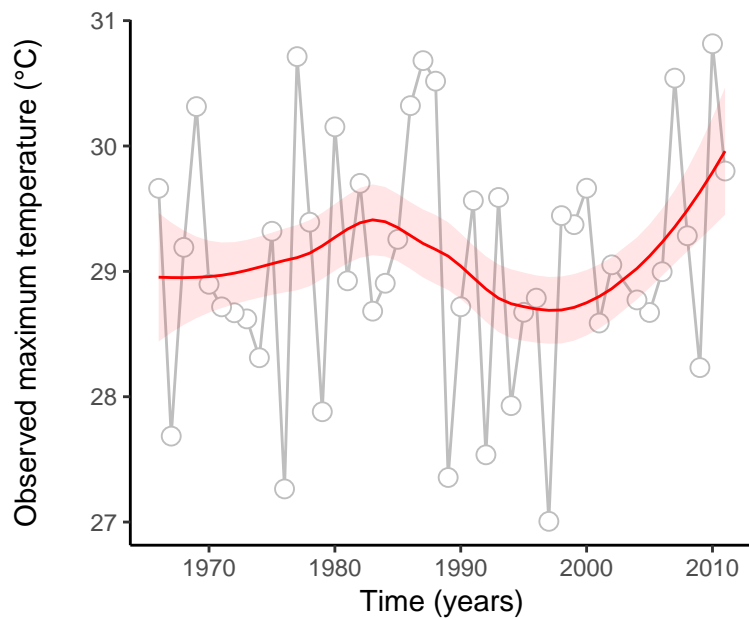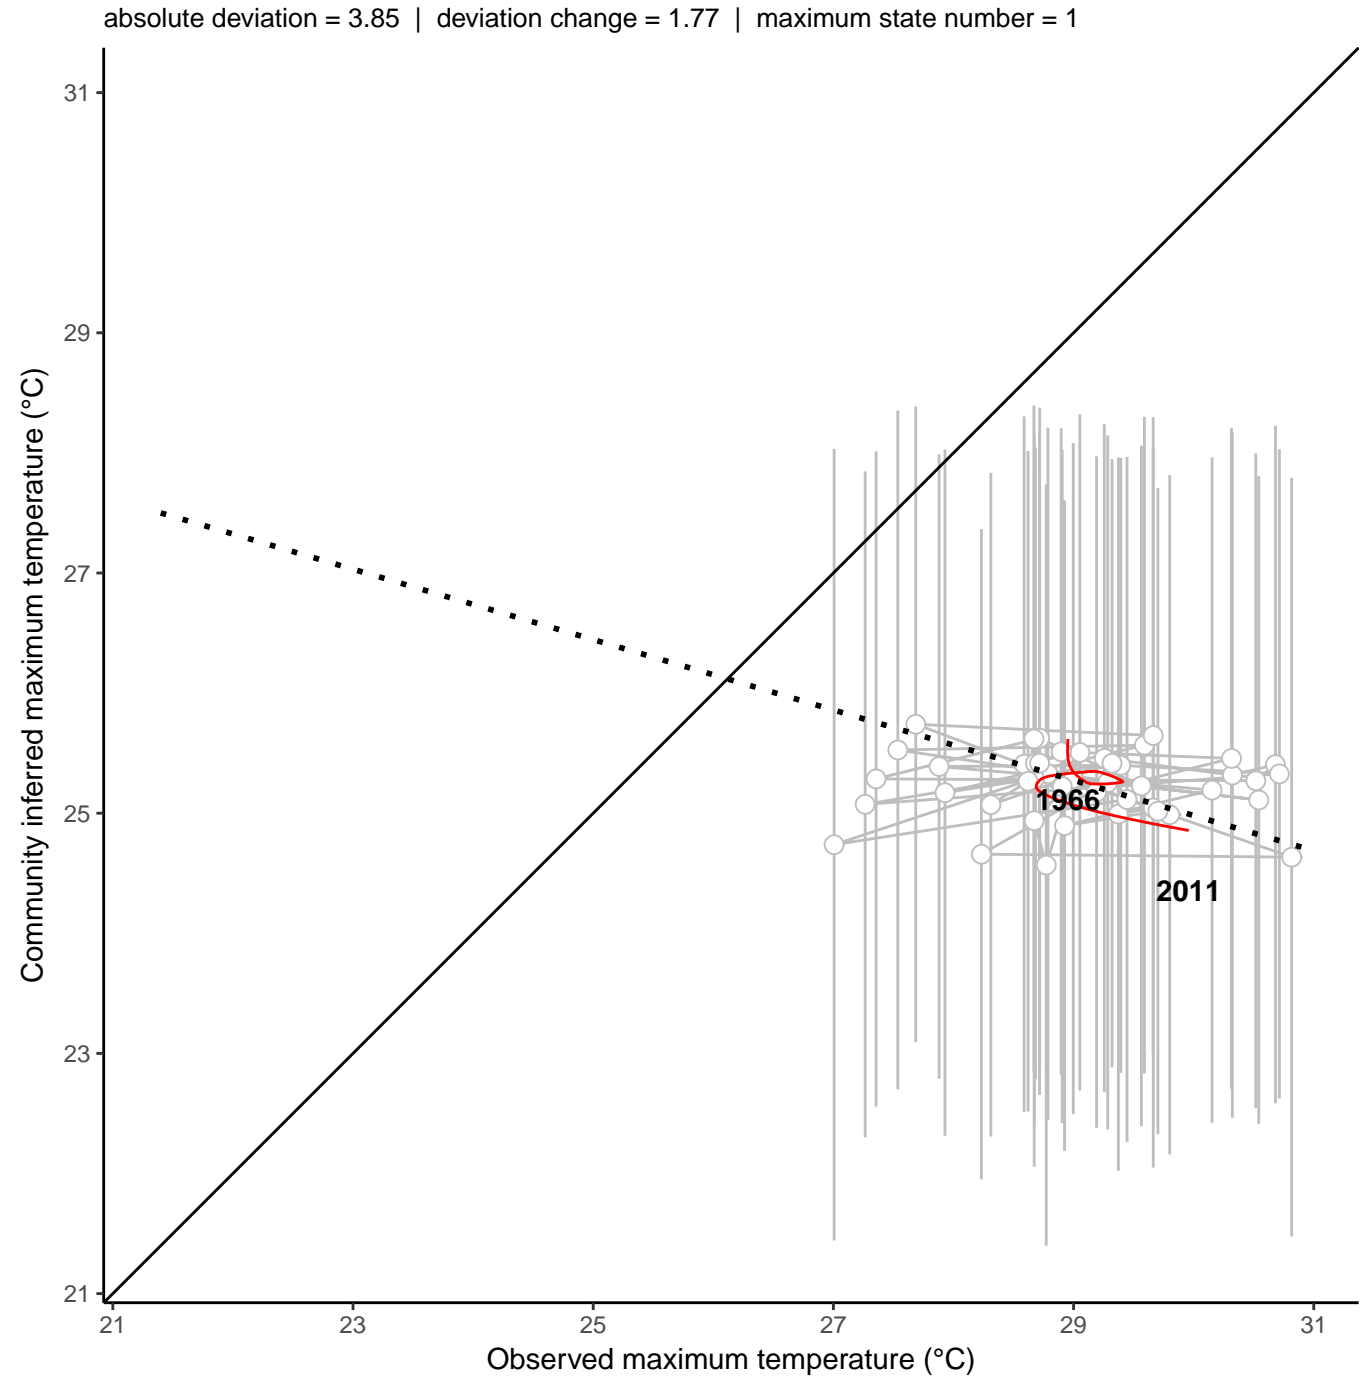

site : 840\_89\_5

absolute deviation = 2.92 | deviation change = 1.48 | maximum state number = 1

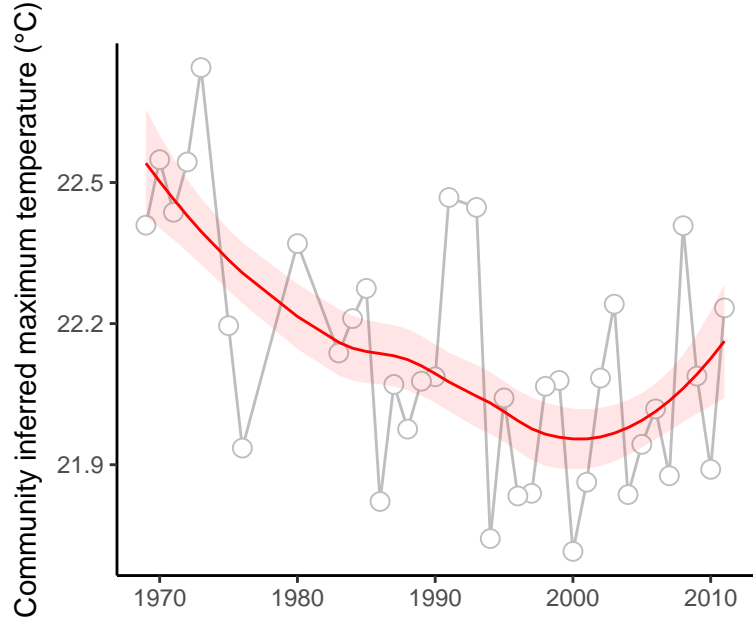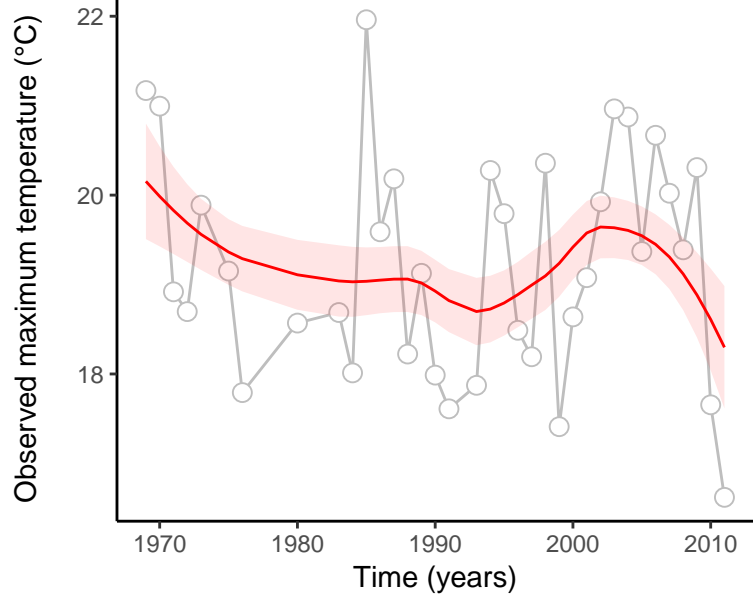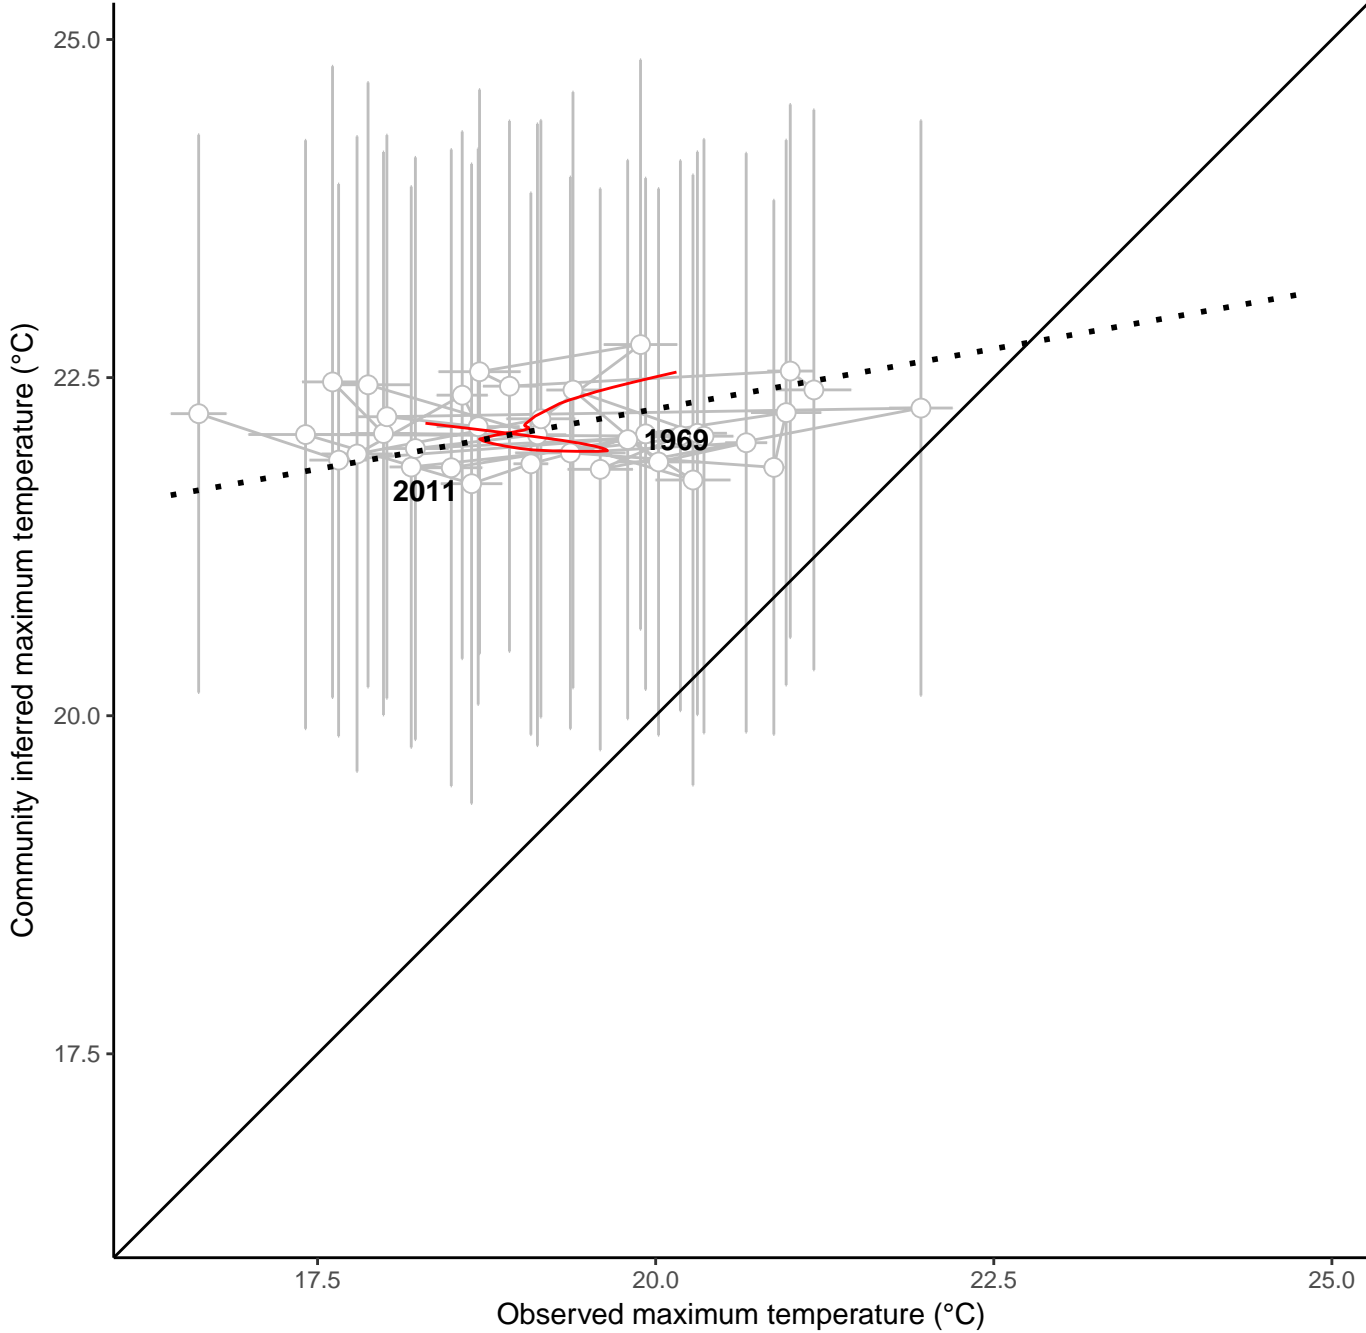

site : 840\_91\_12

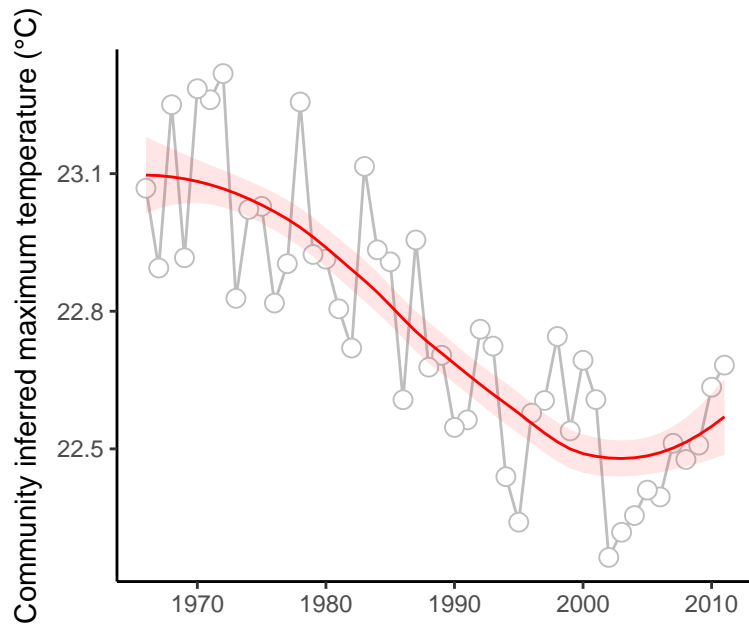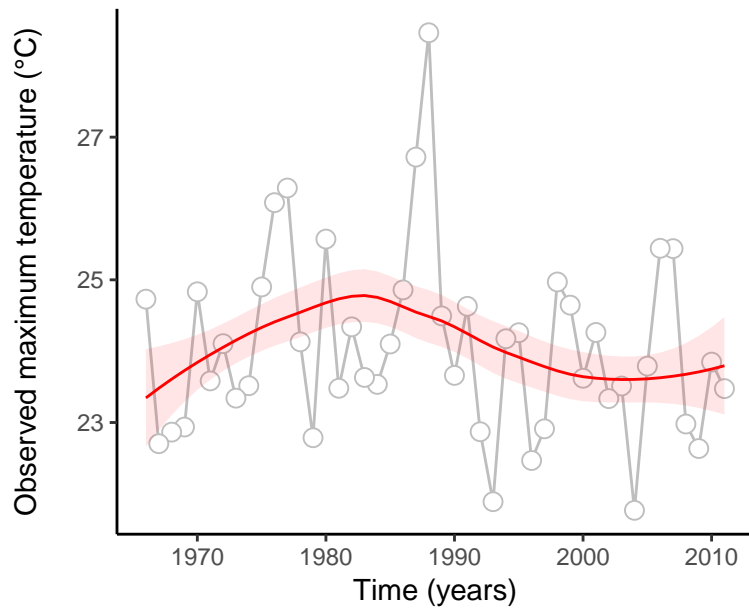

absolute deviation = 1.3 | deviation change = 0.98 | maximum state number = 1

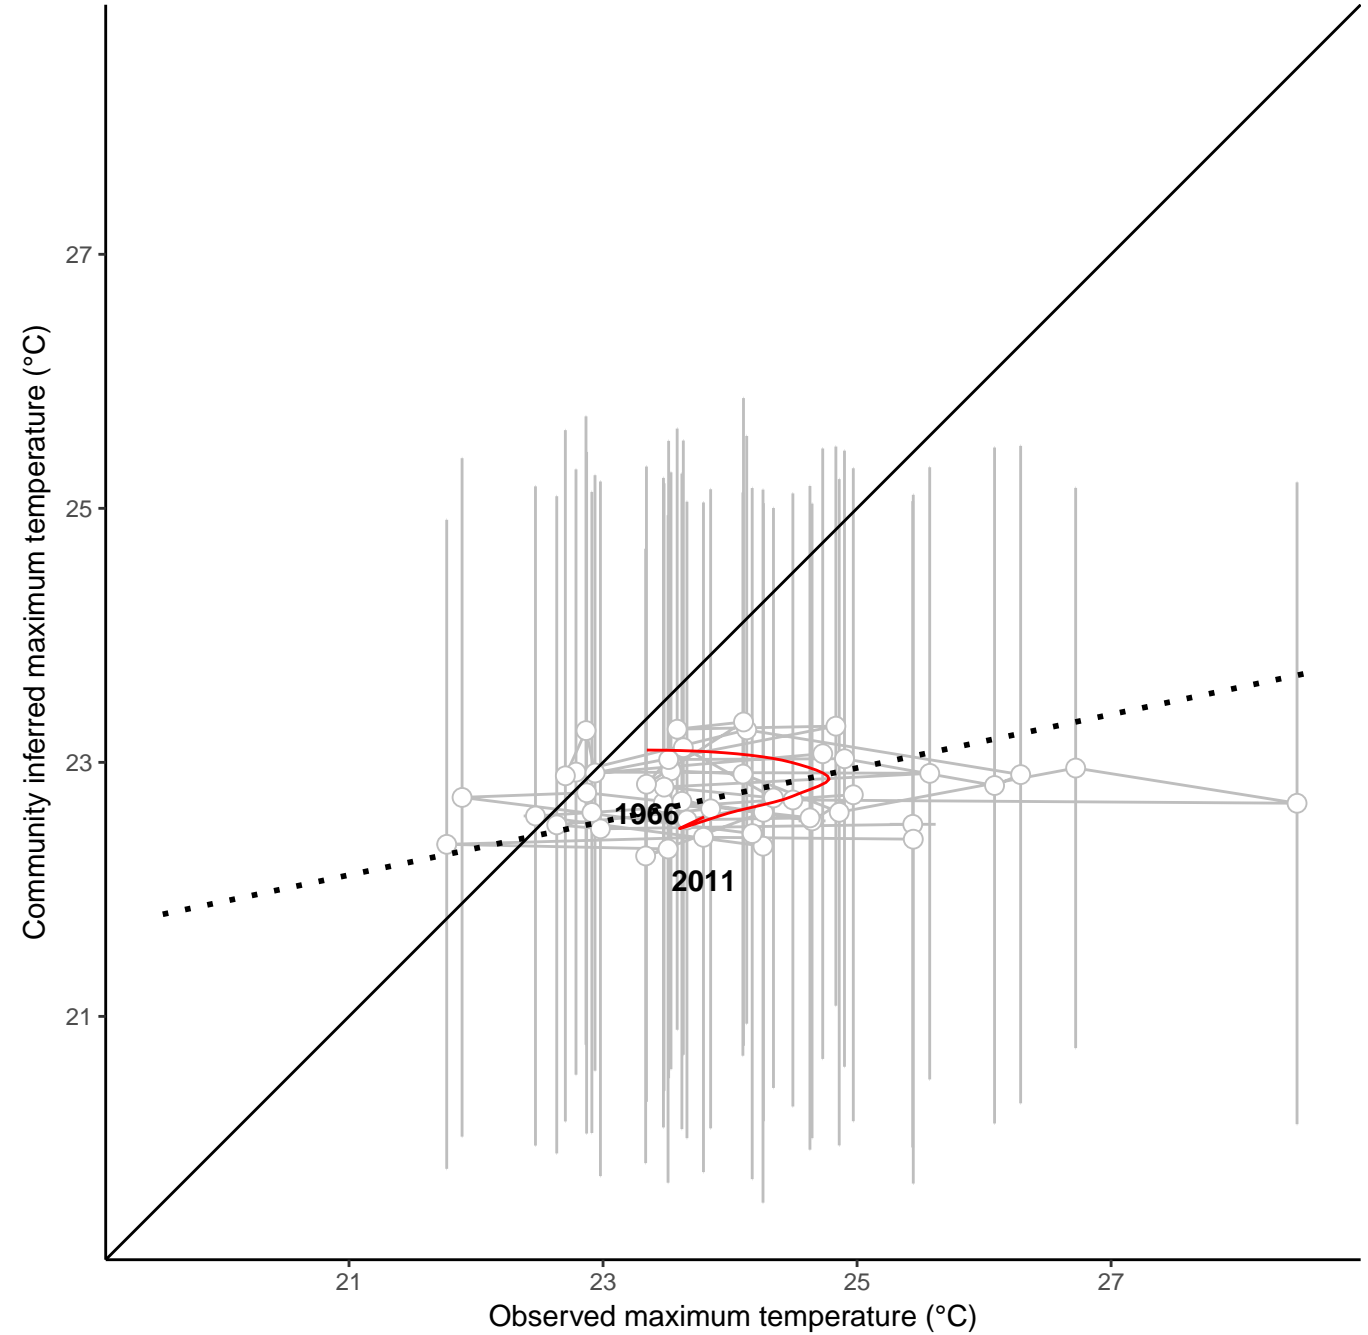



site : 840\_91\_45

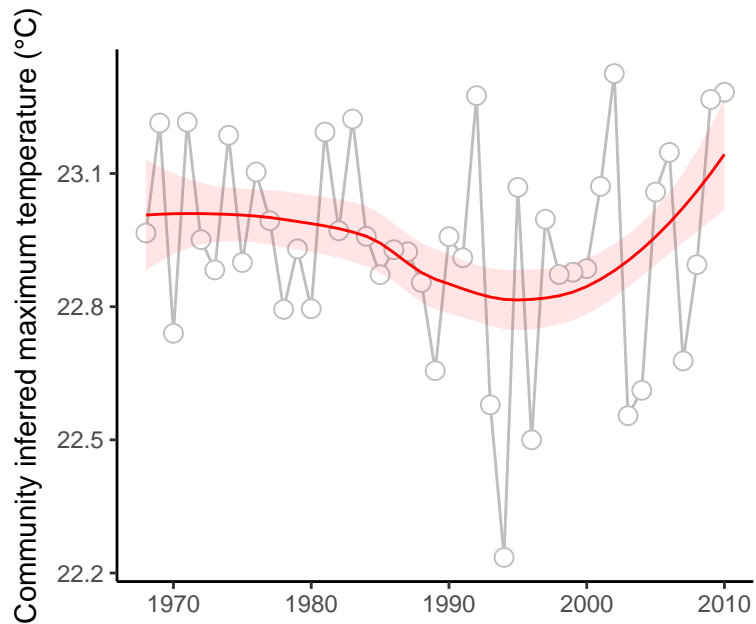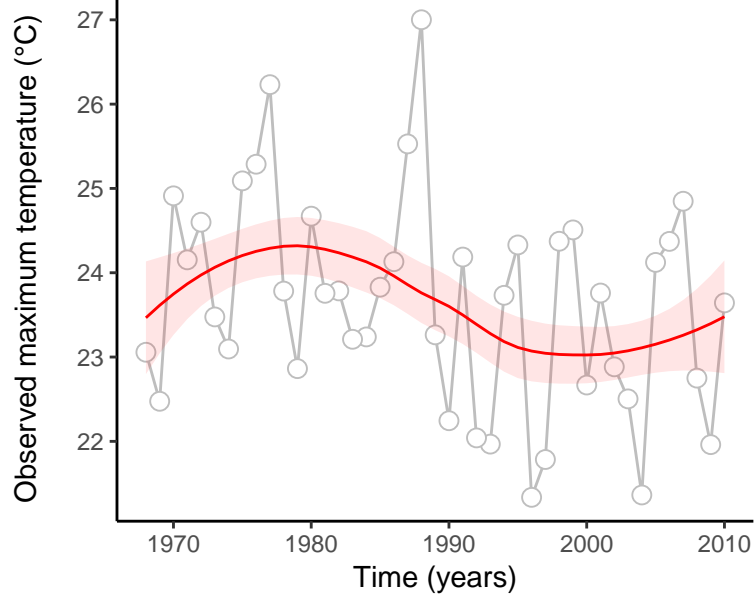

absolute deviation = 0.69 | deviation change = -0.12 | maximum state number = 1

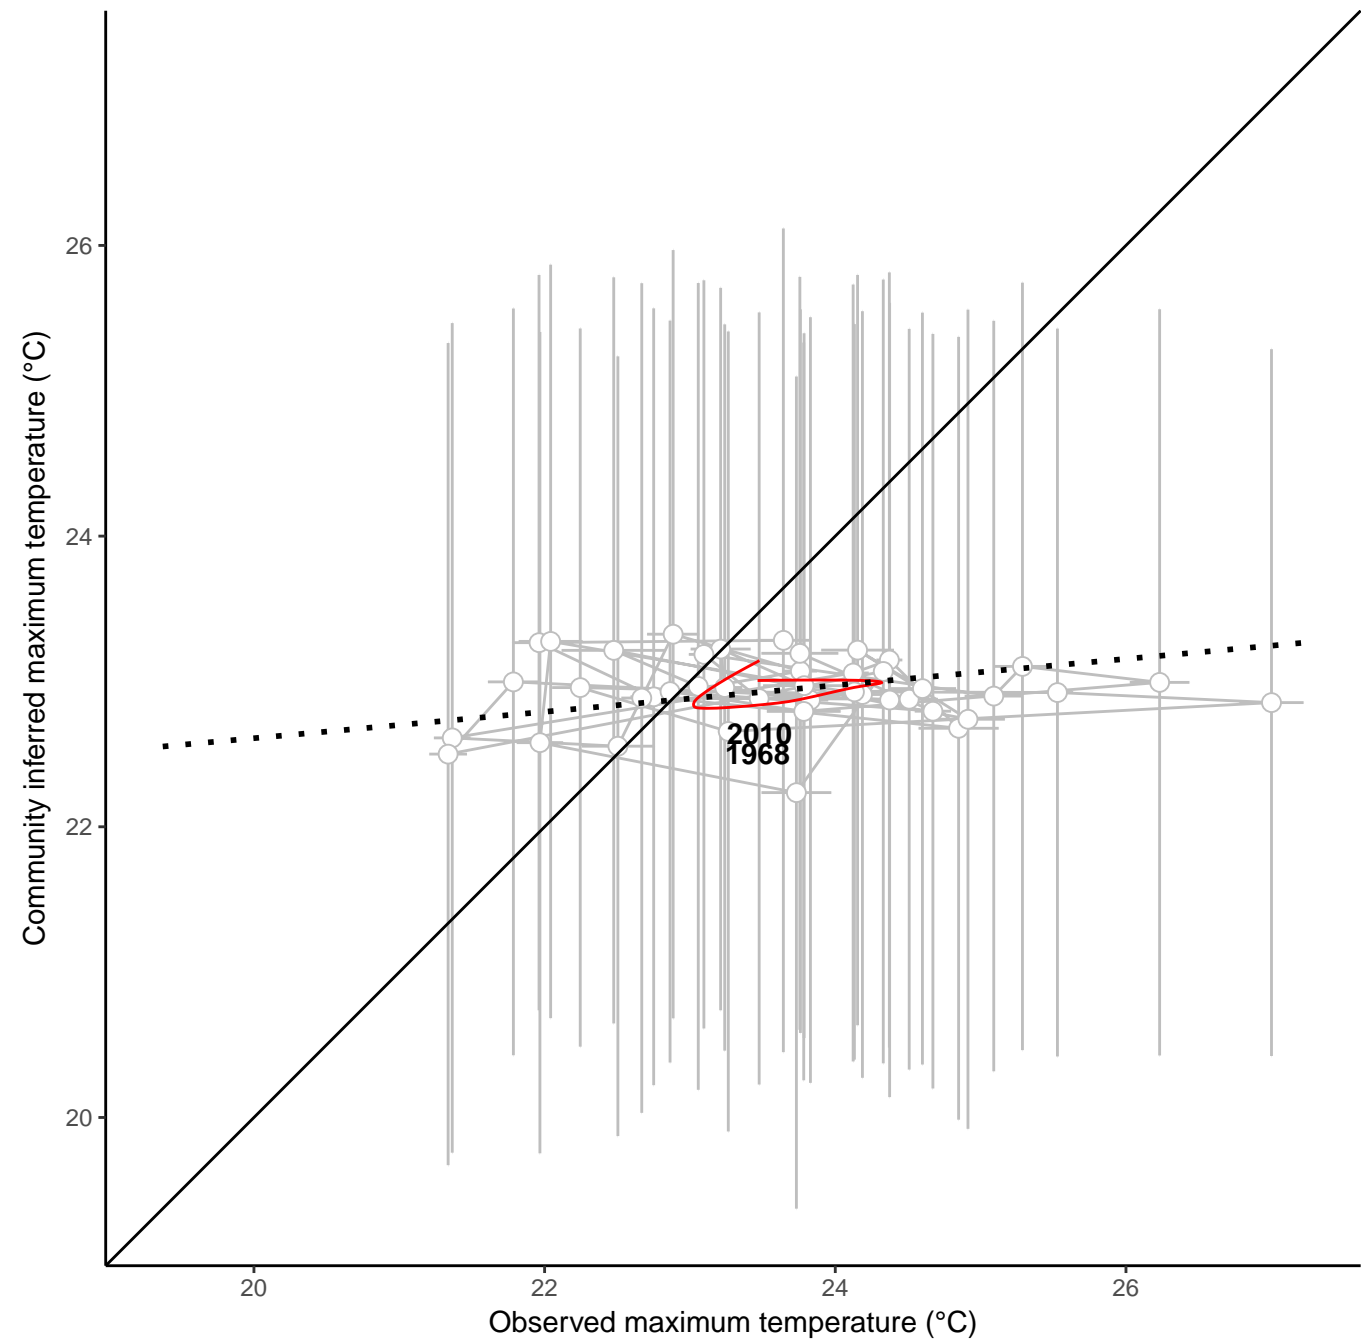

site : 840\_14\_193

absolute deviation = 2.53 | deviation change = -1.35 | maximum state number = 1

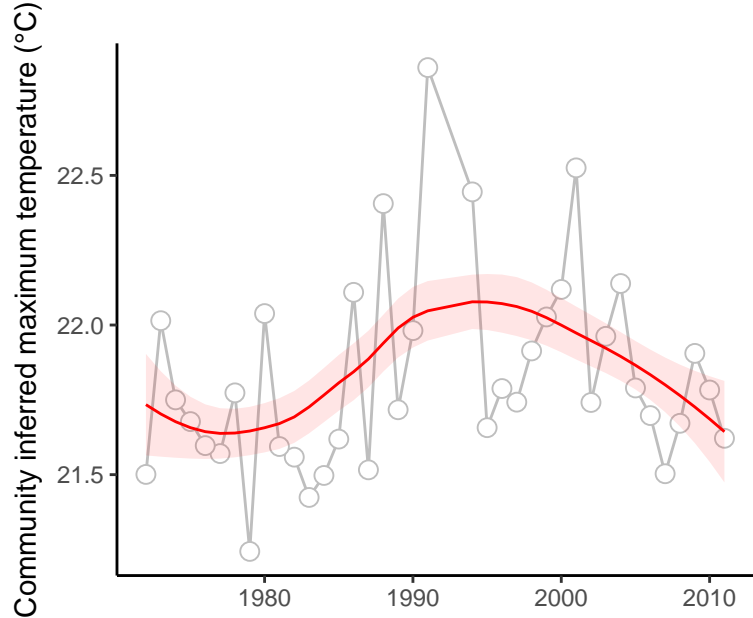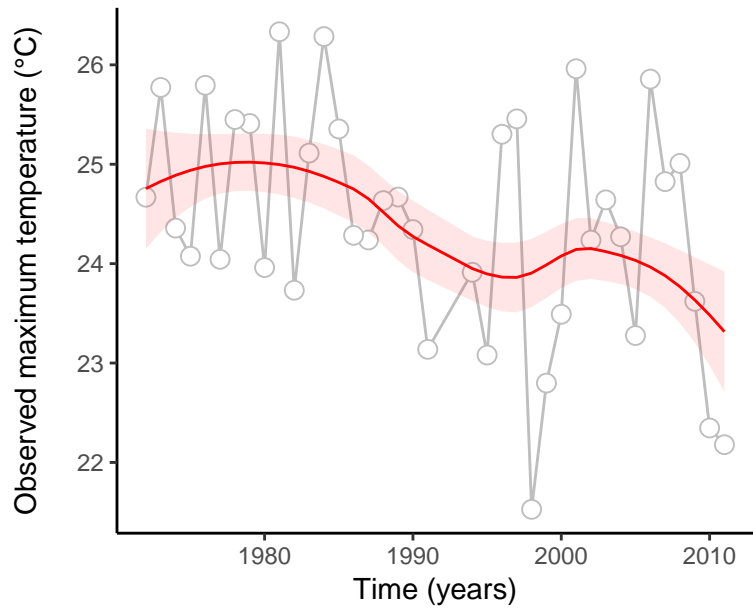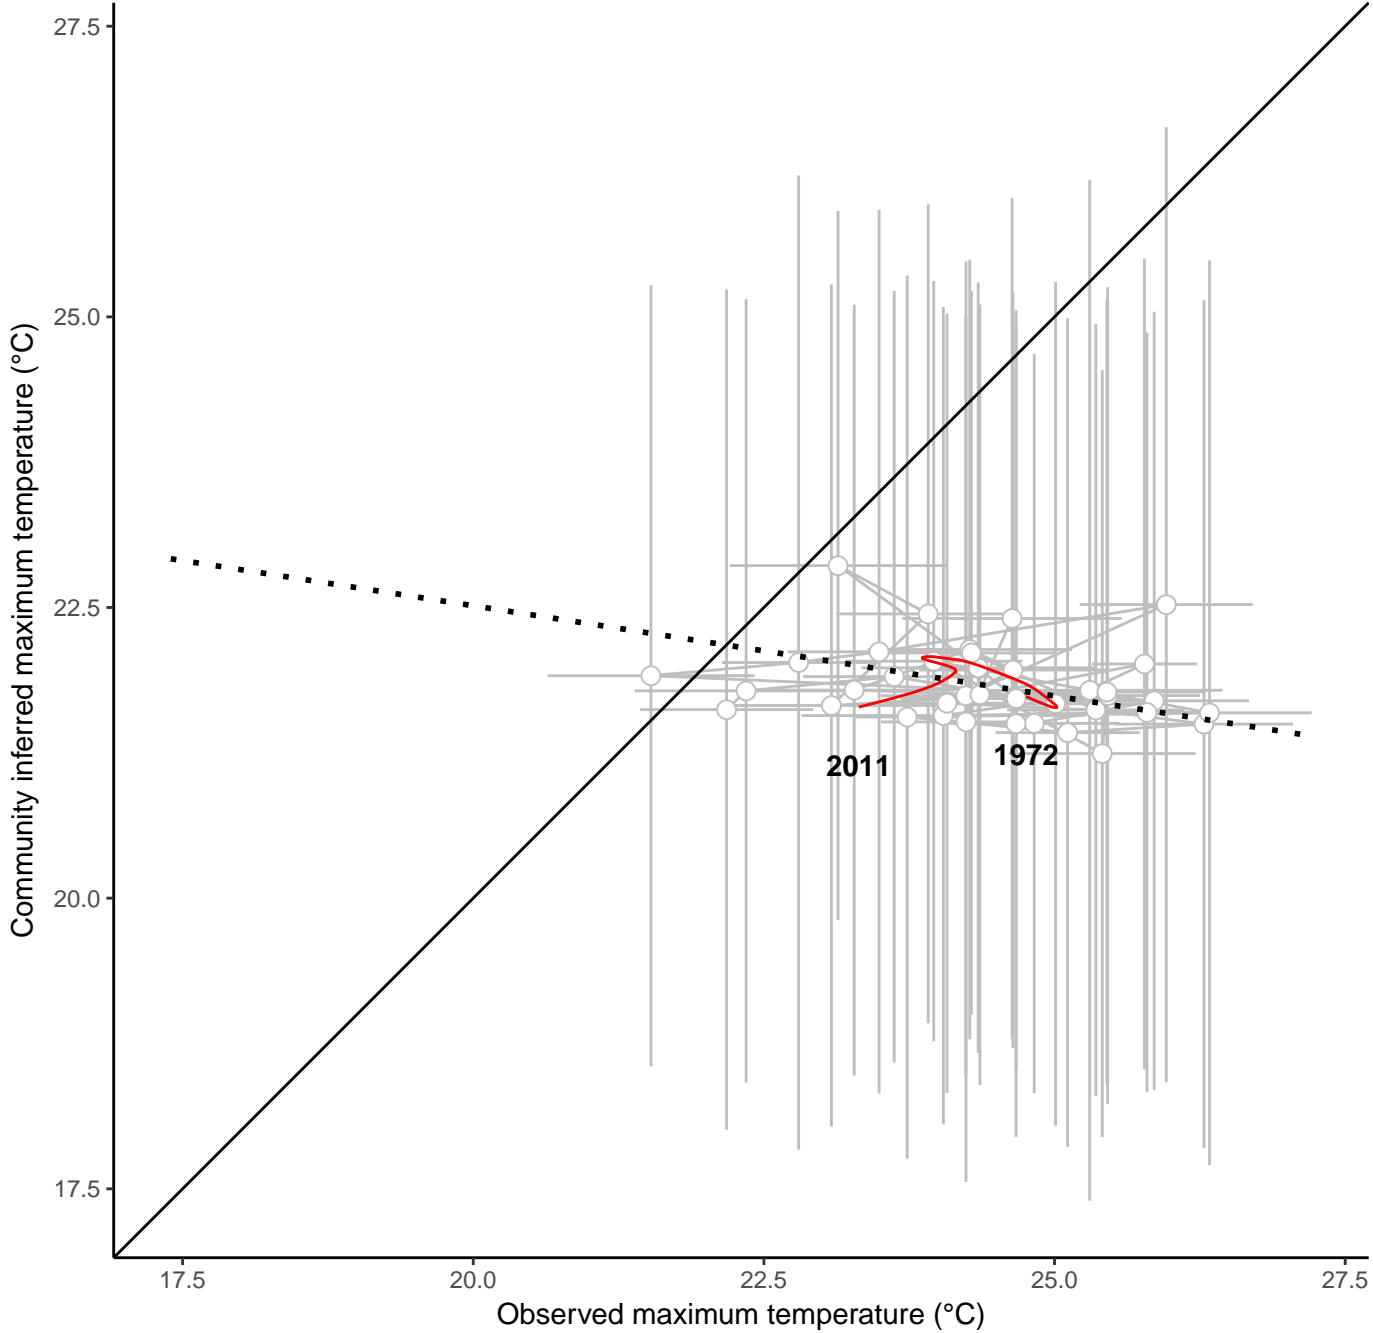

site : 840\_2\_36

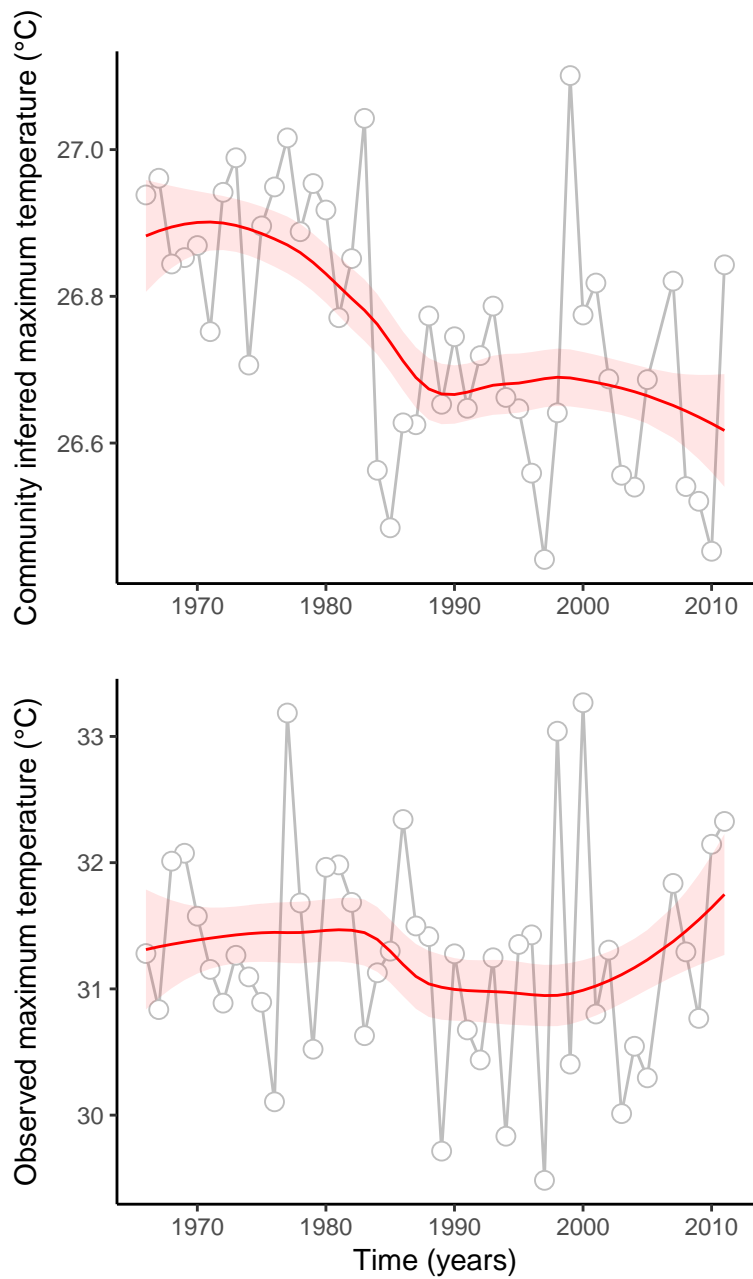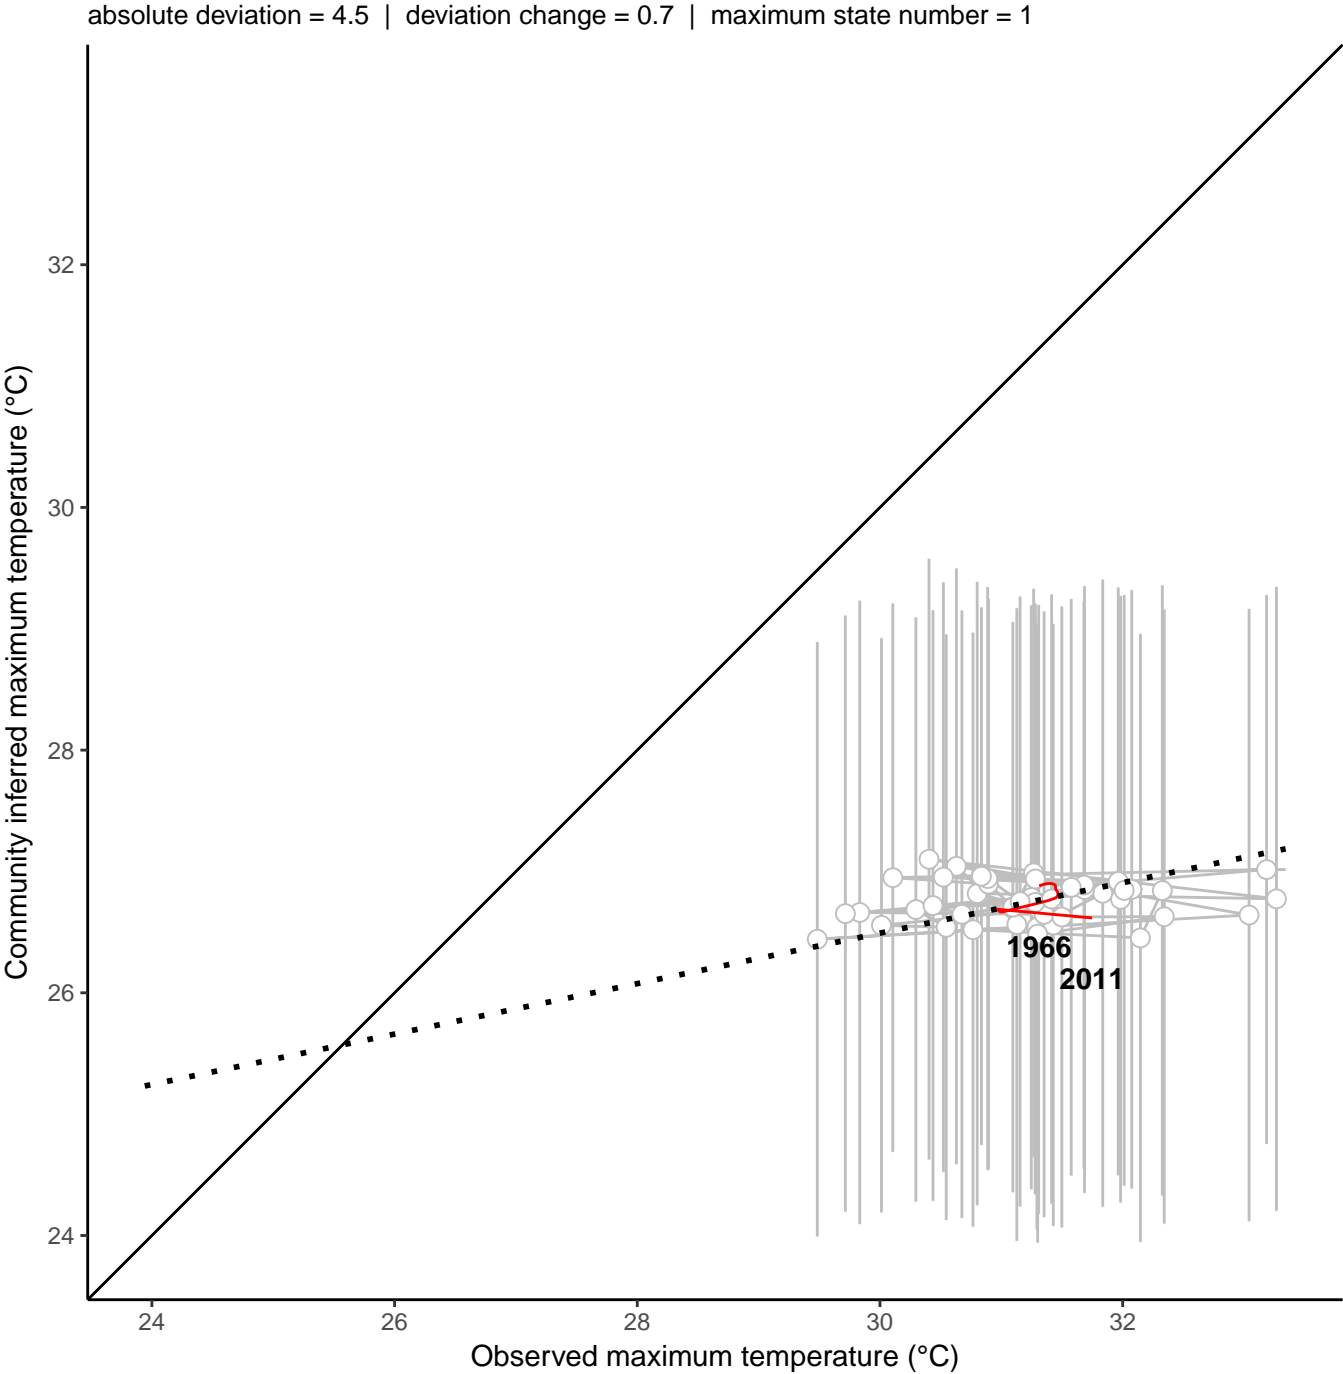

site : 840\_39\_41

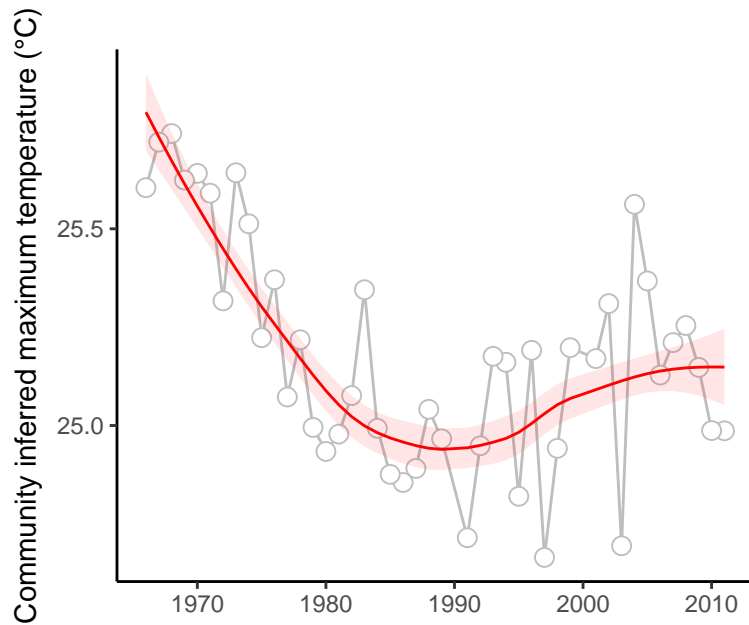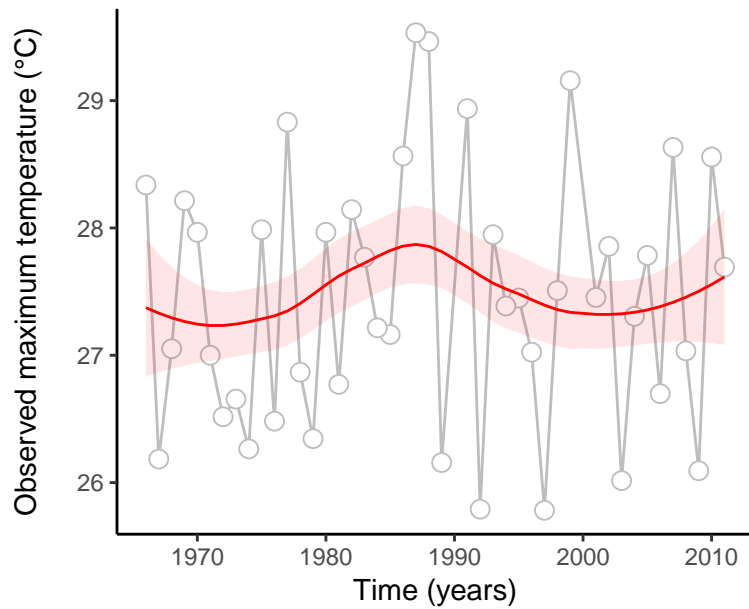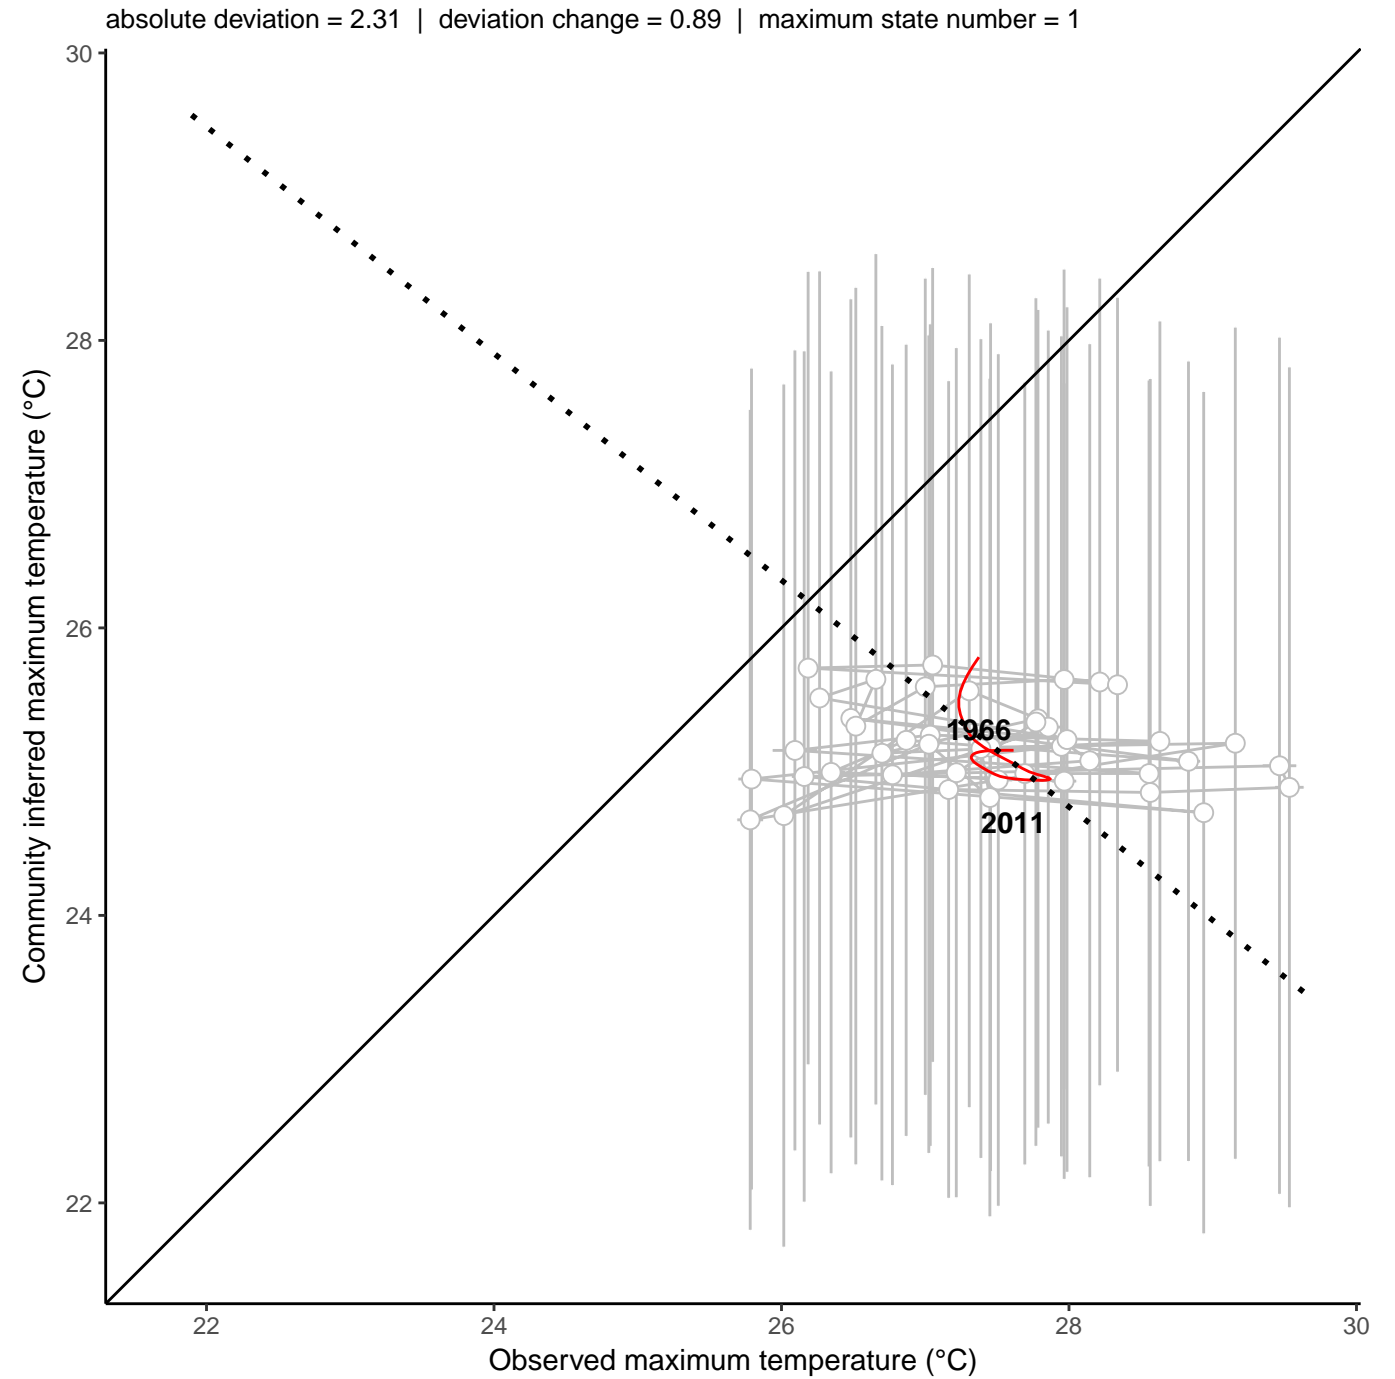

site : 840\_46\_47

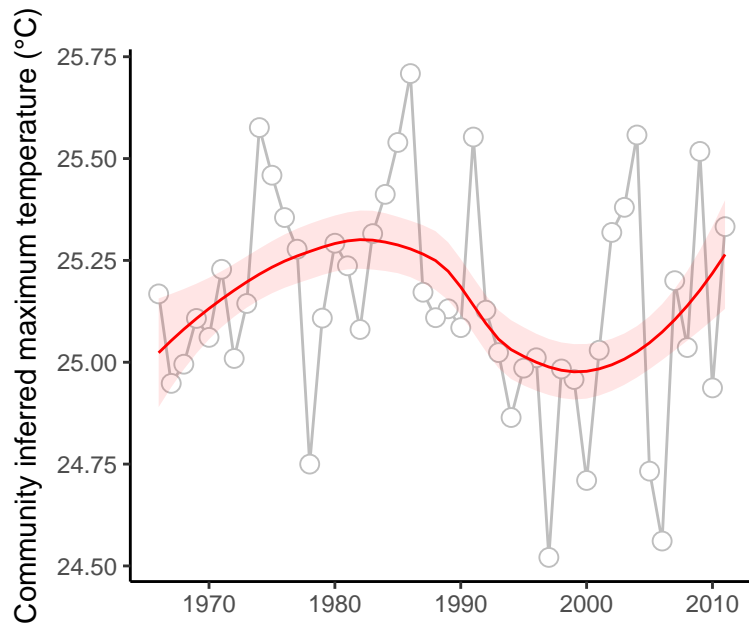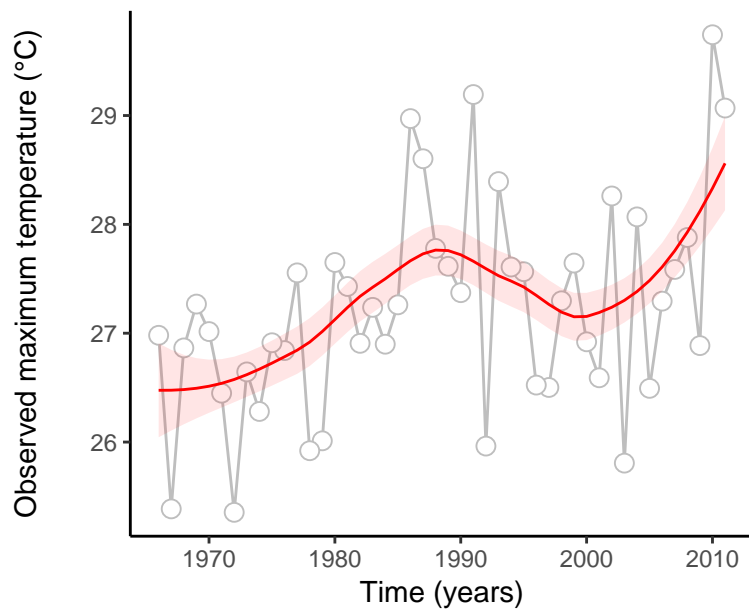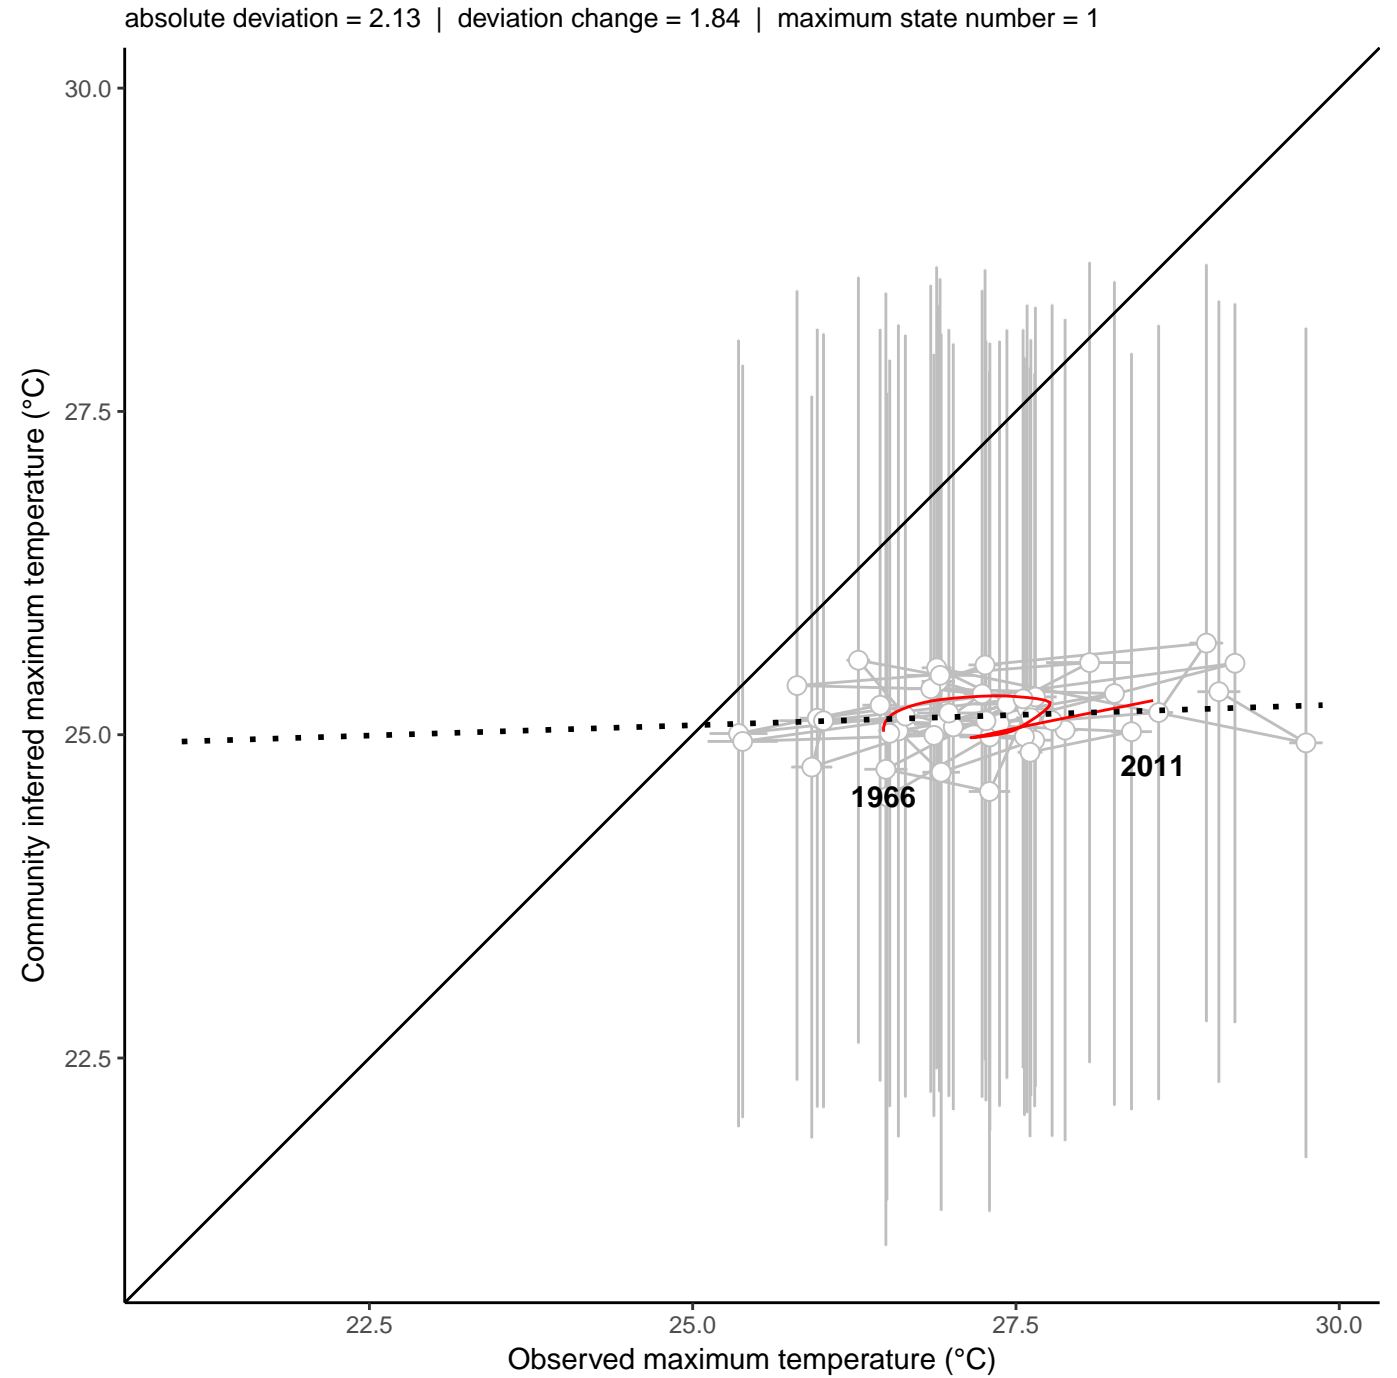

site : 840\_49\_32

absolute deviation = 1.65 | deviation change = 0.27 | maximum state number = 1

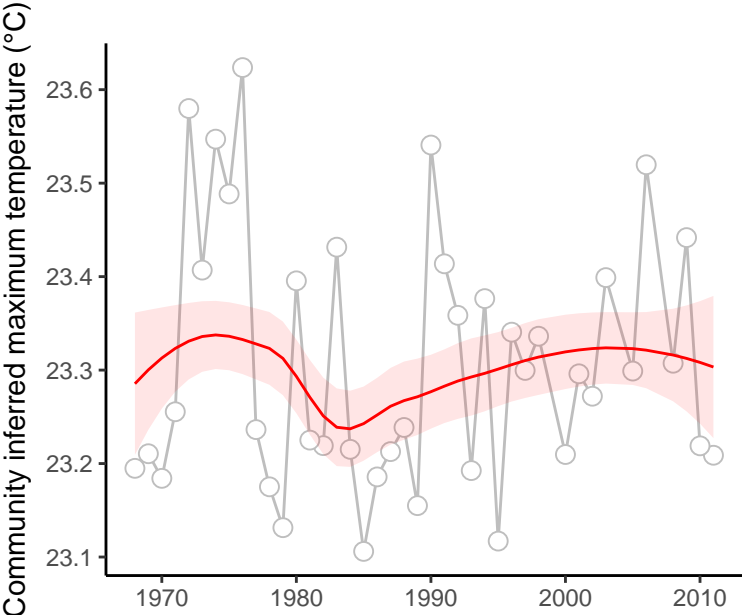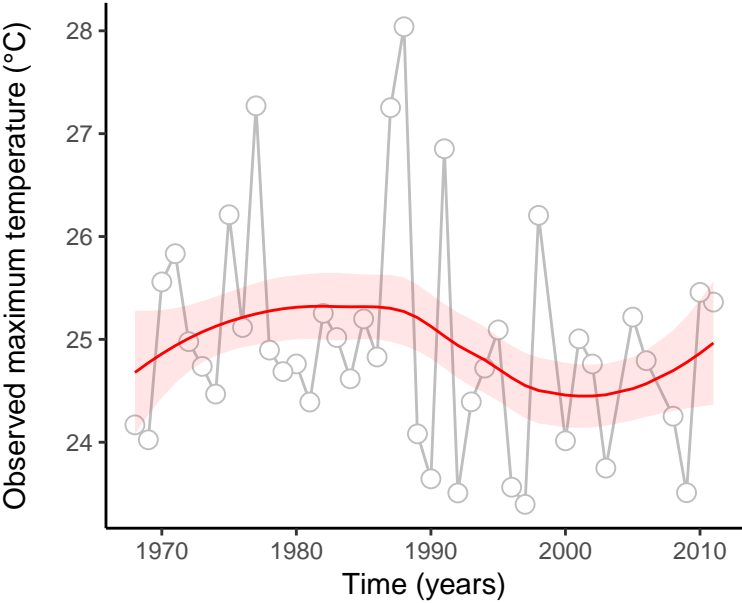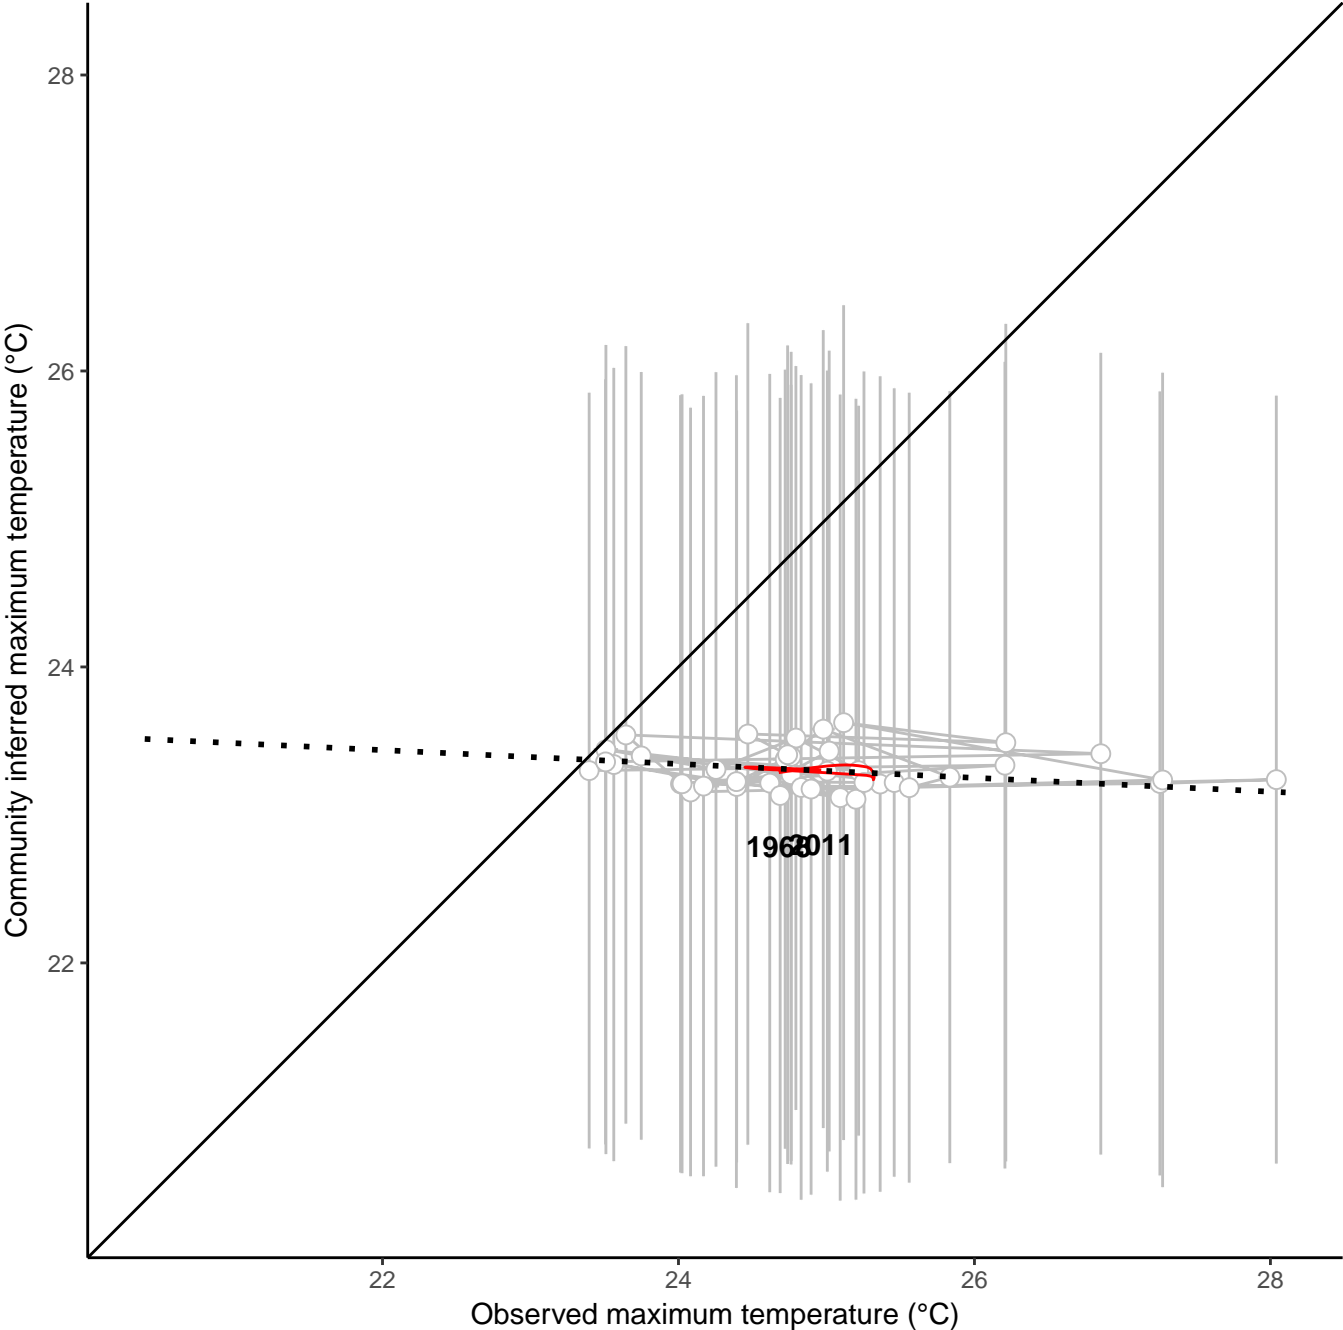

site : 840\_49\_45

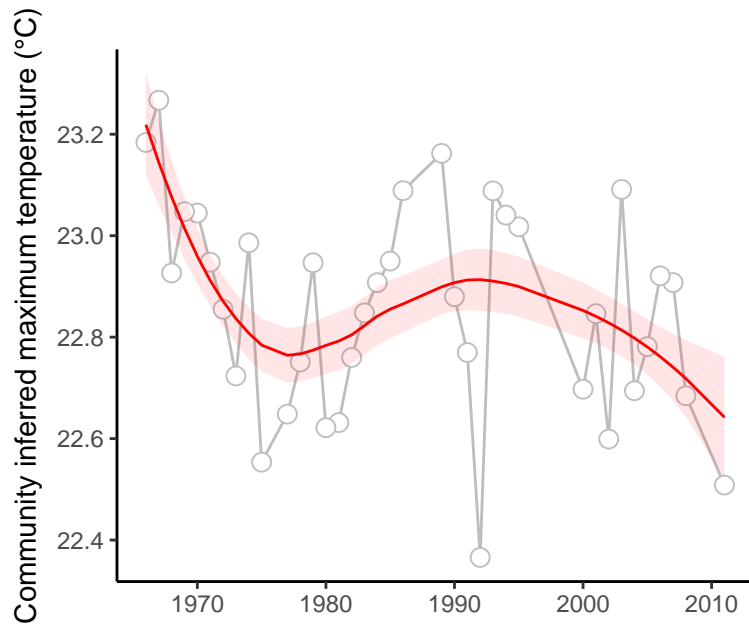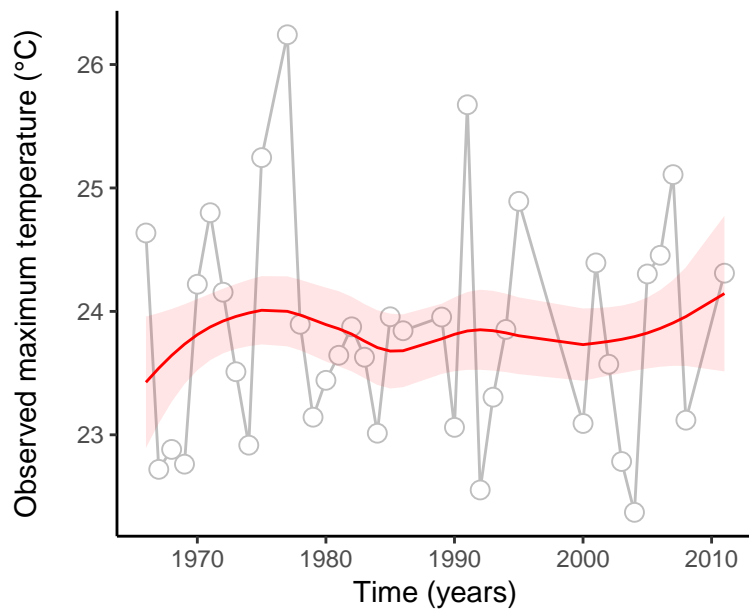

absolute deviation = 0.96 | deviation change = 1.3 | maximum state number = 1

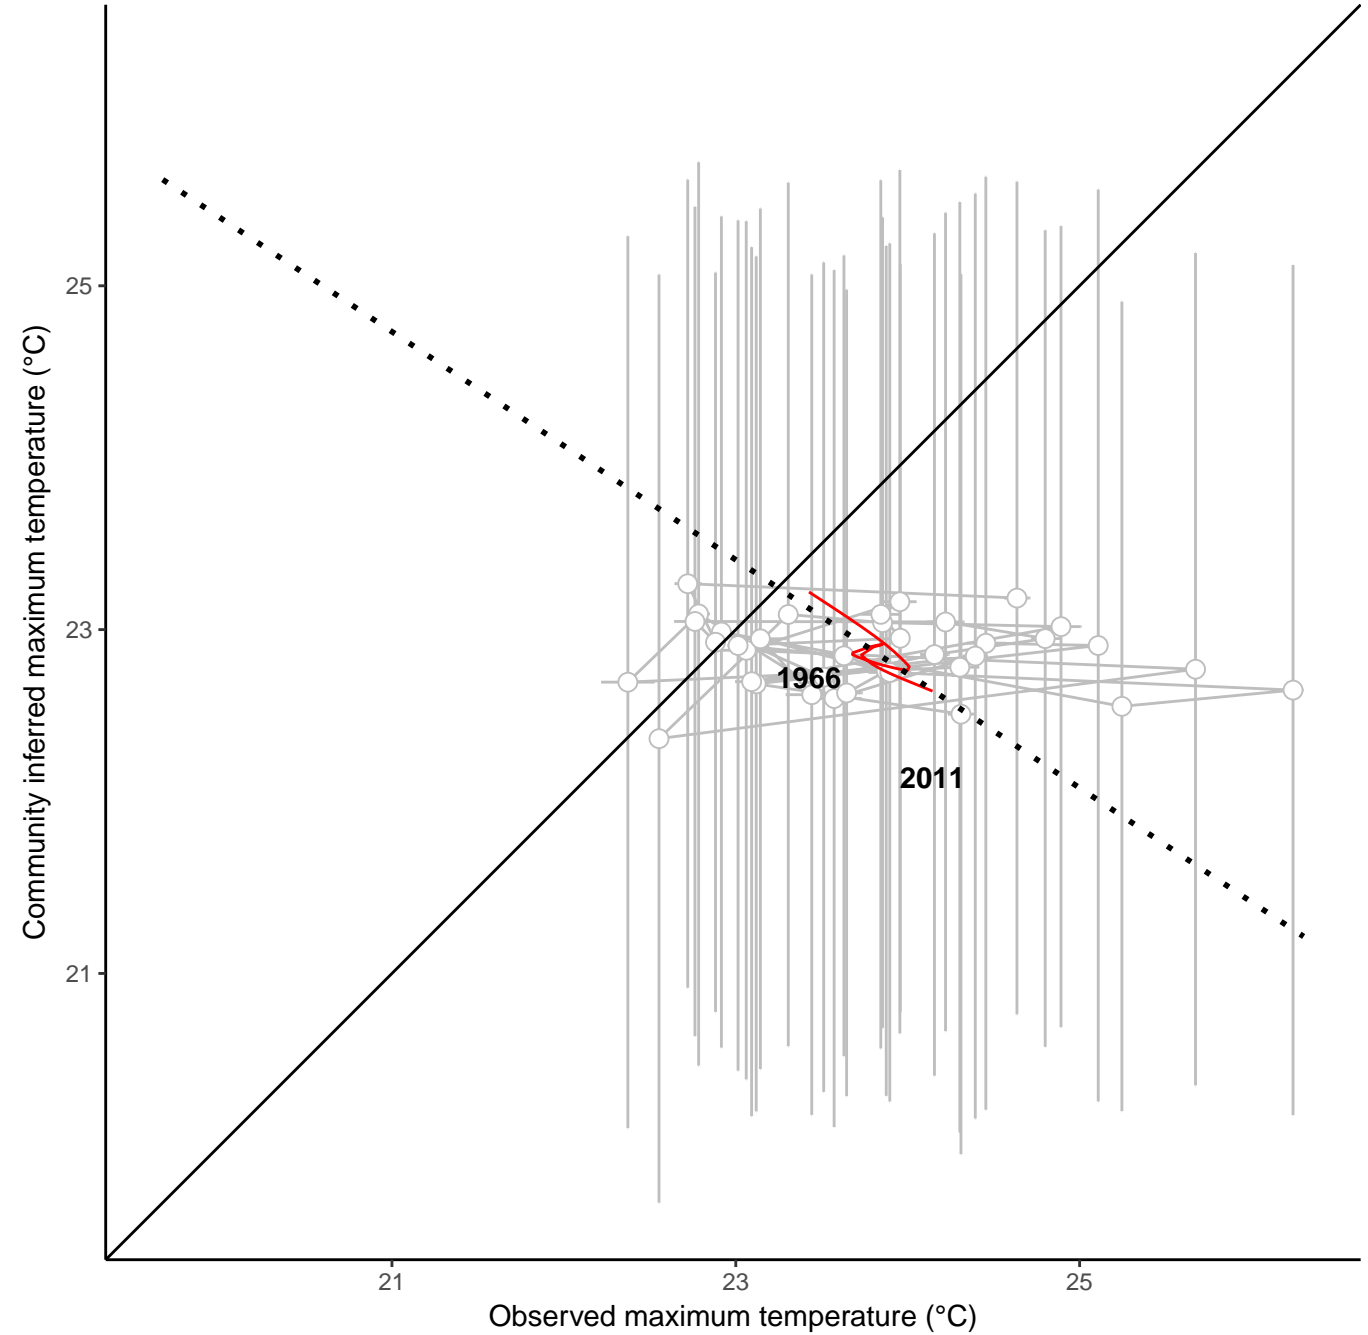

site : 840\_50\_35

absolute deviation = 1.02 | deviation change = 0.16 | maximum state number = 1

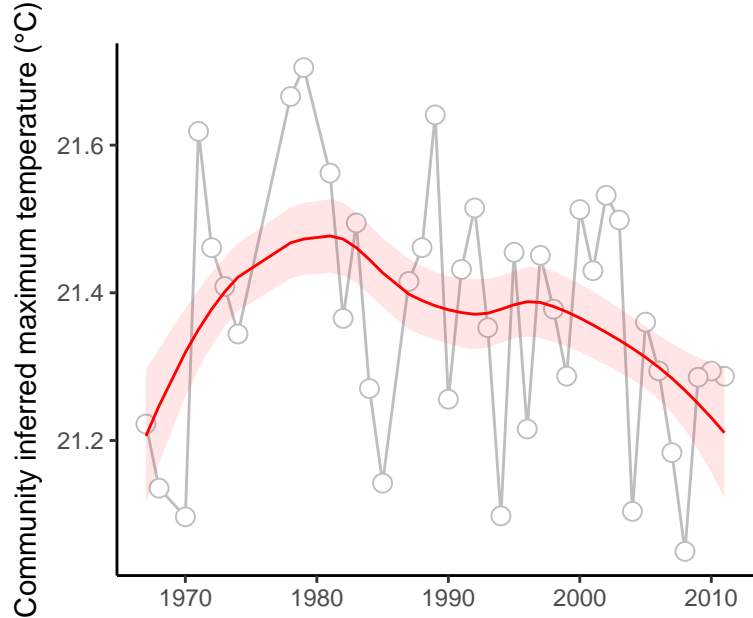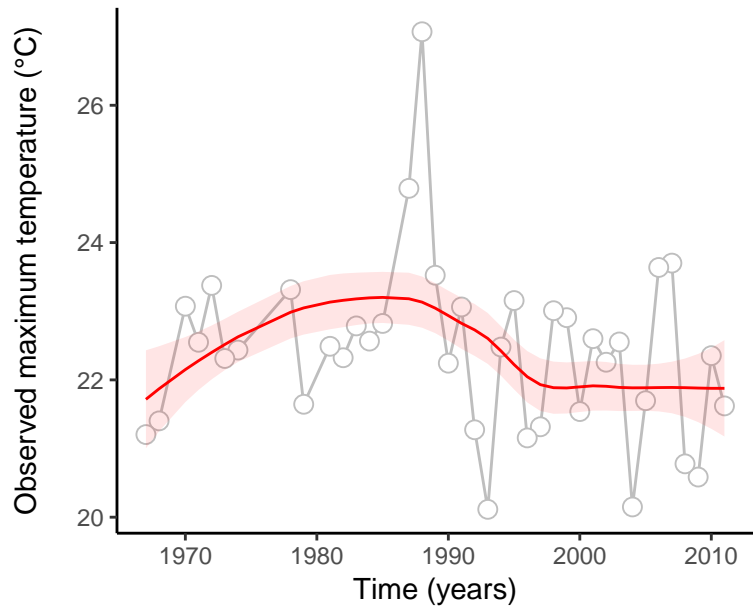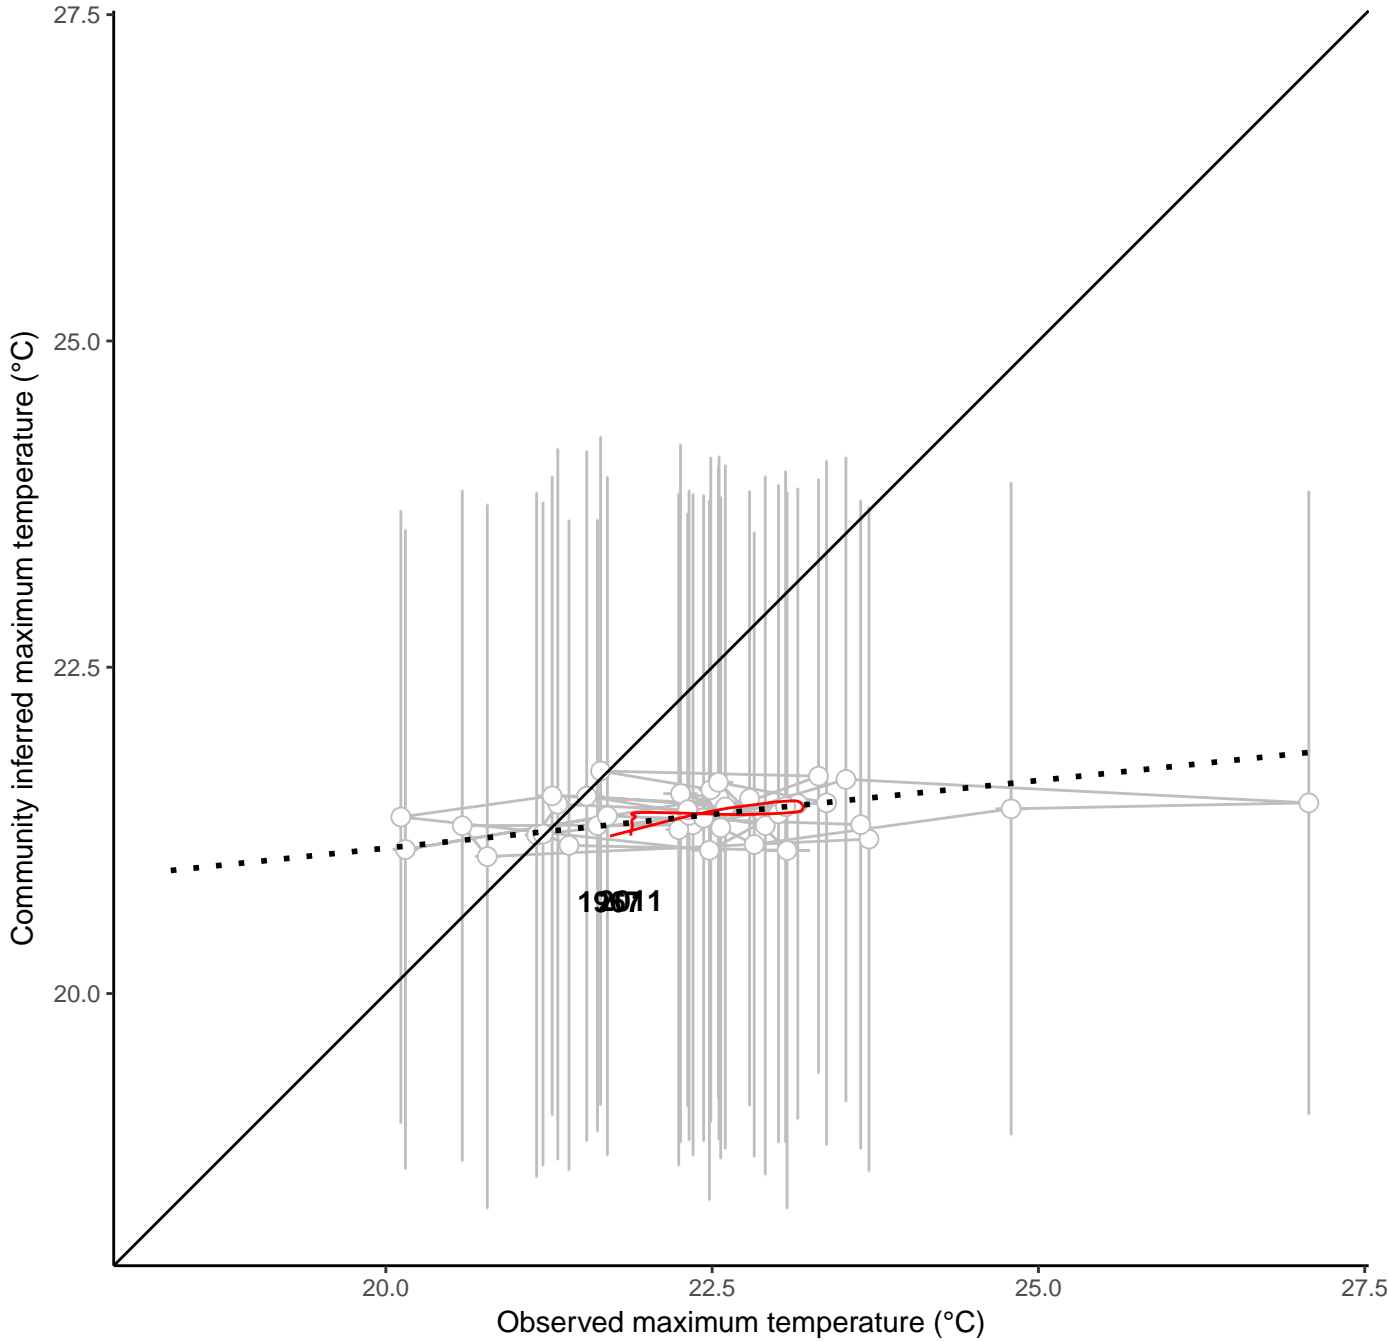



site : 840\_14\_174

absolute deviation = 3.25 | deviation change = -1.54 | maximum state number = 1

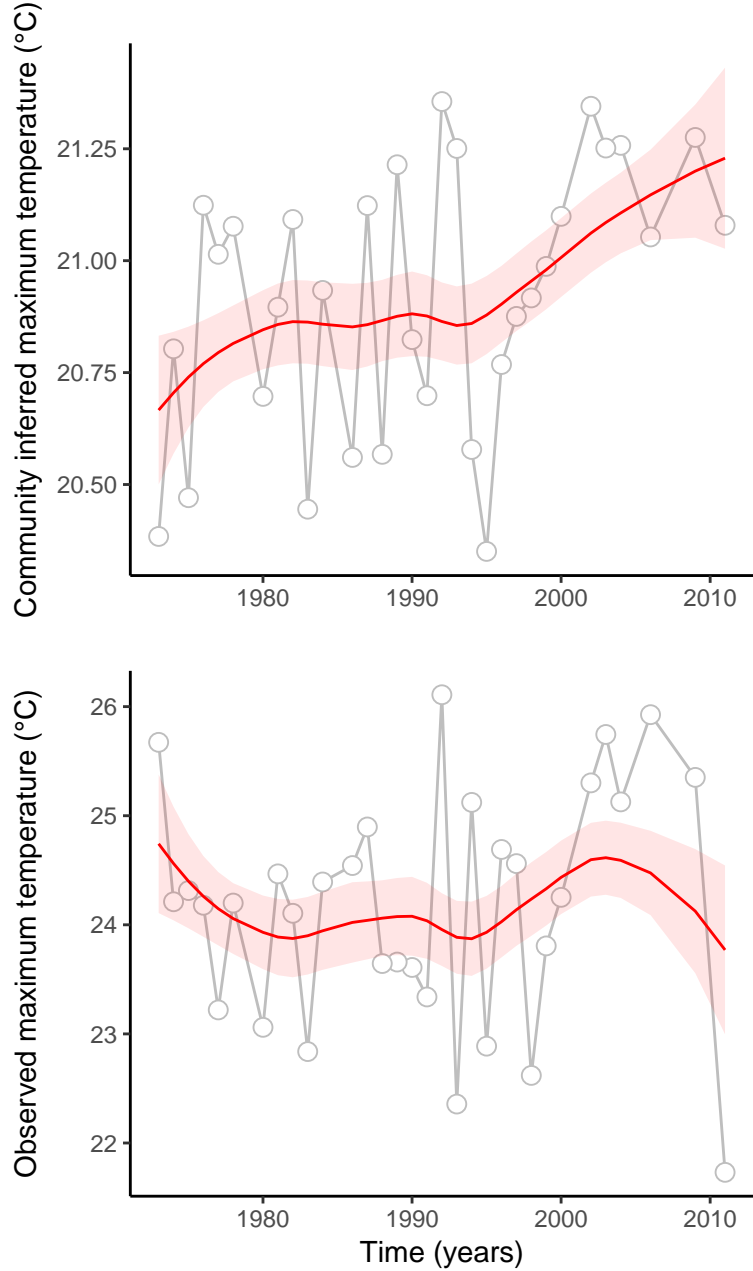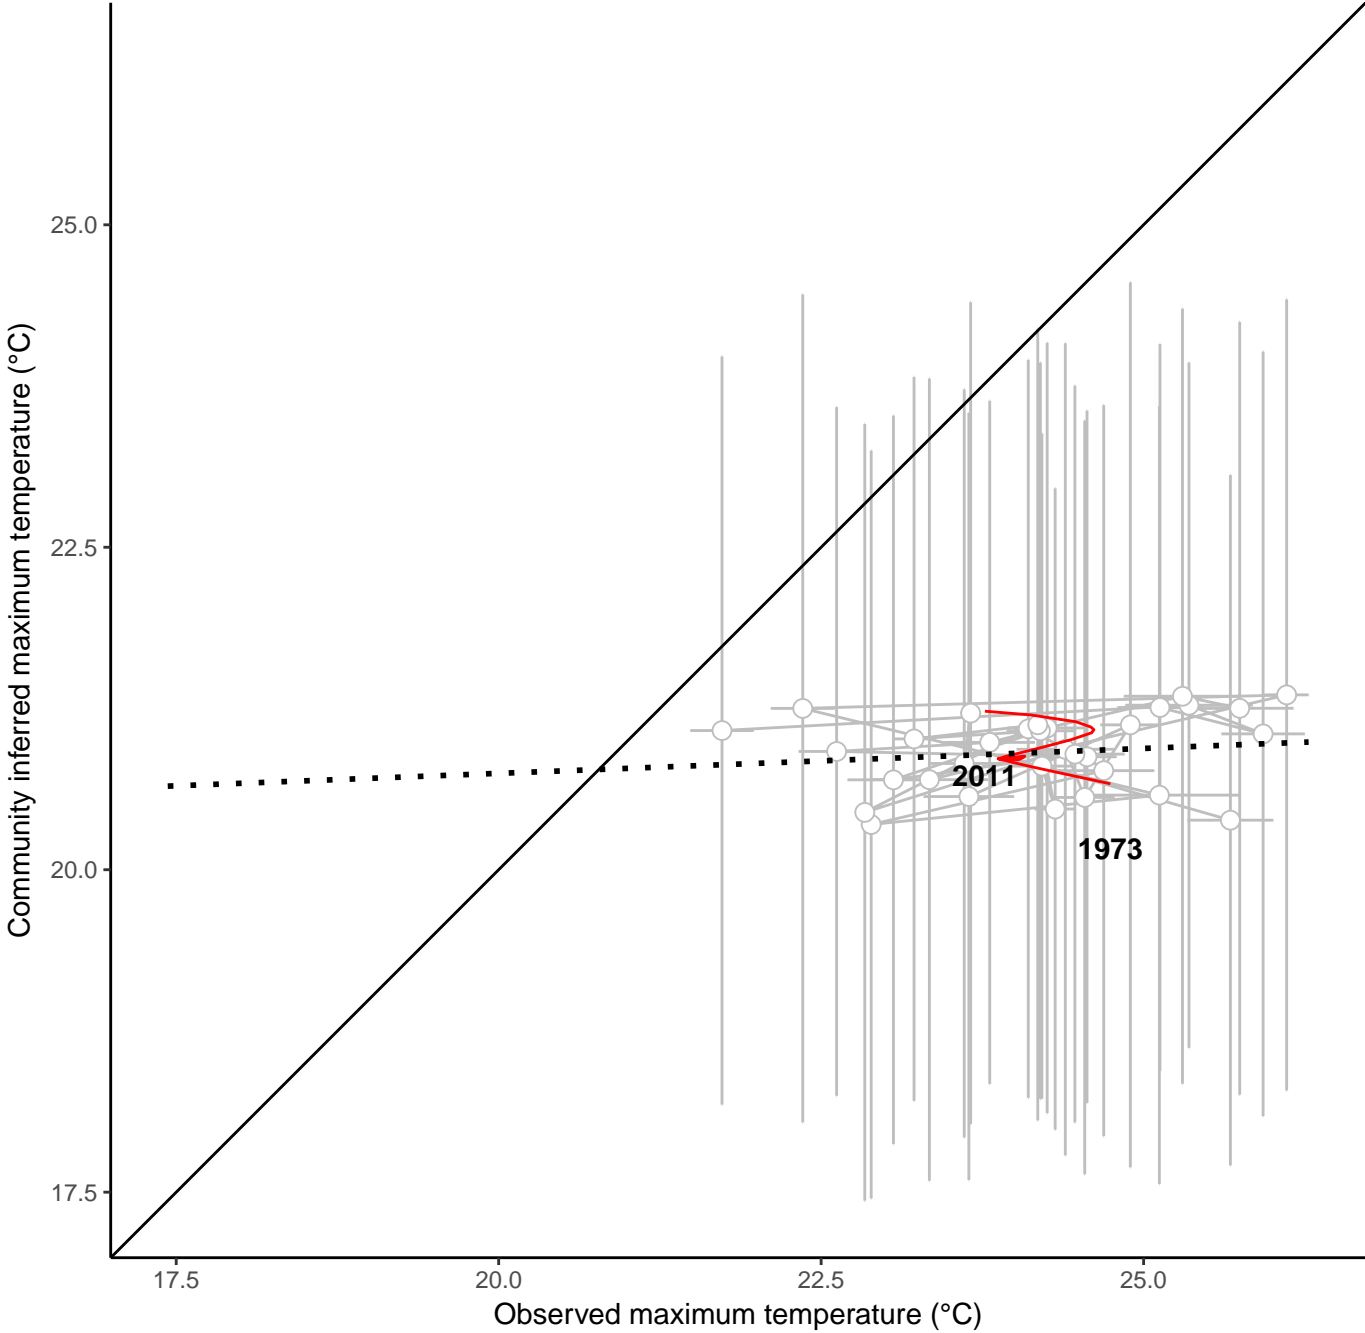

site : 840\_14\_182

absolute deviation = 3.17 | deviation change = -0.69 | maximum state number = 1

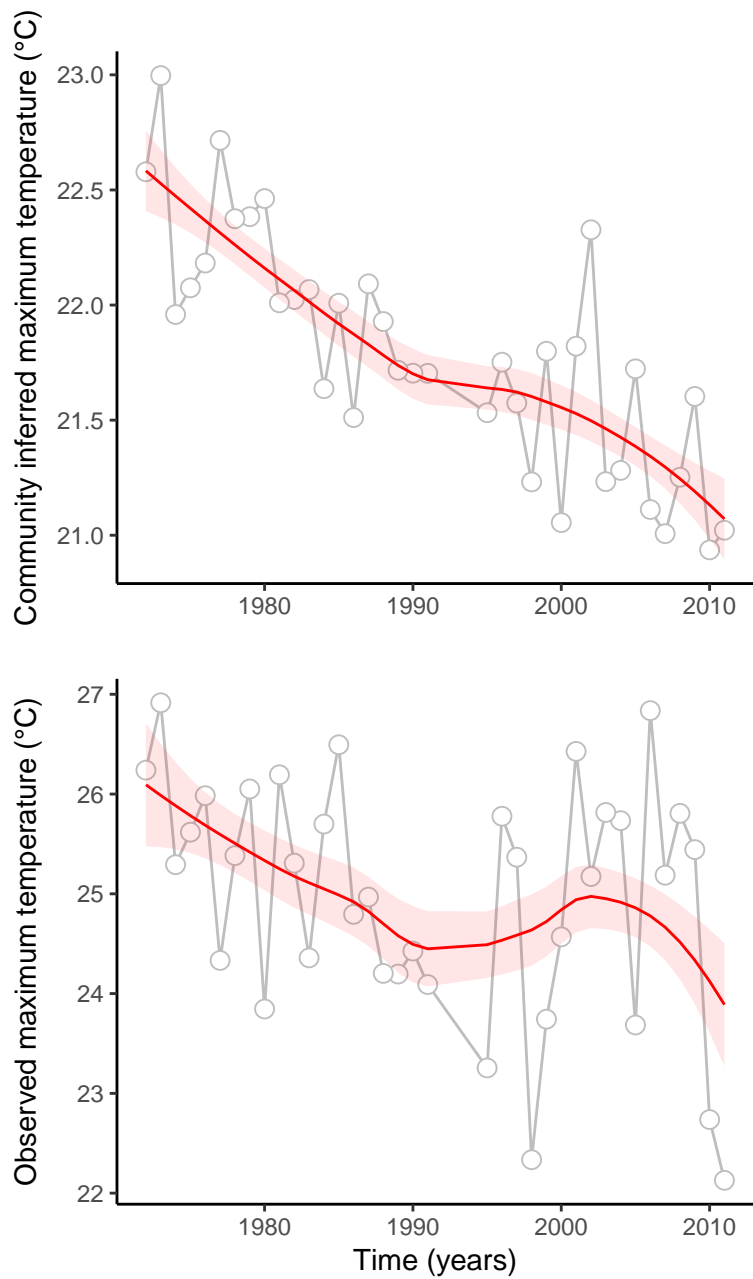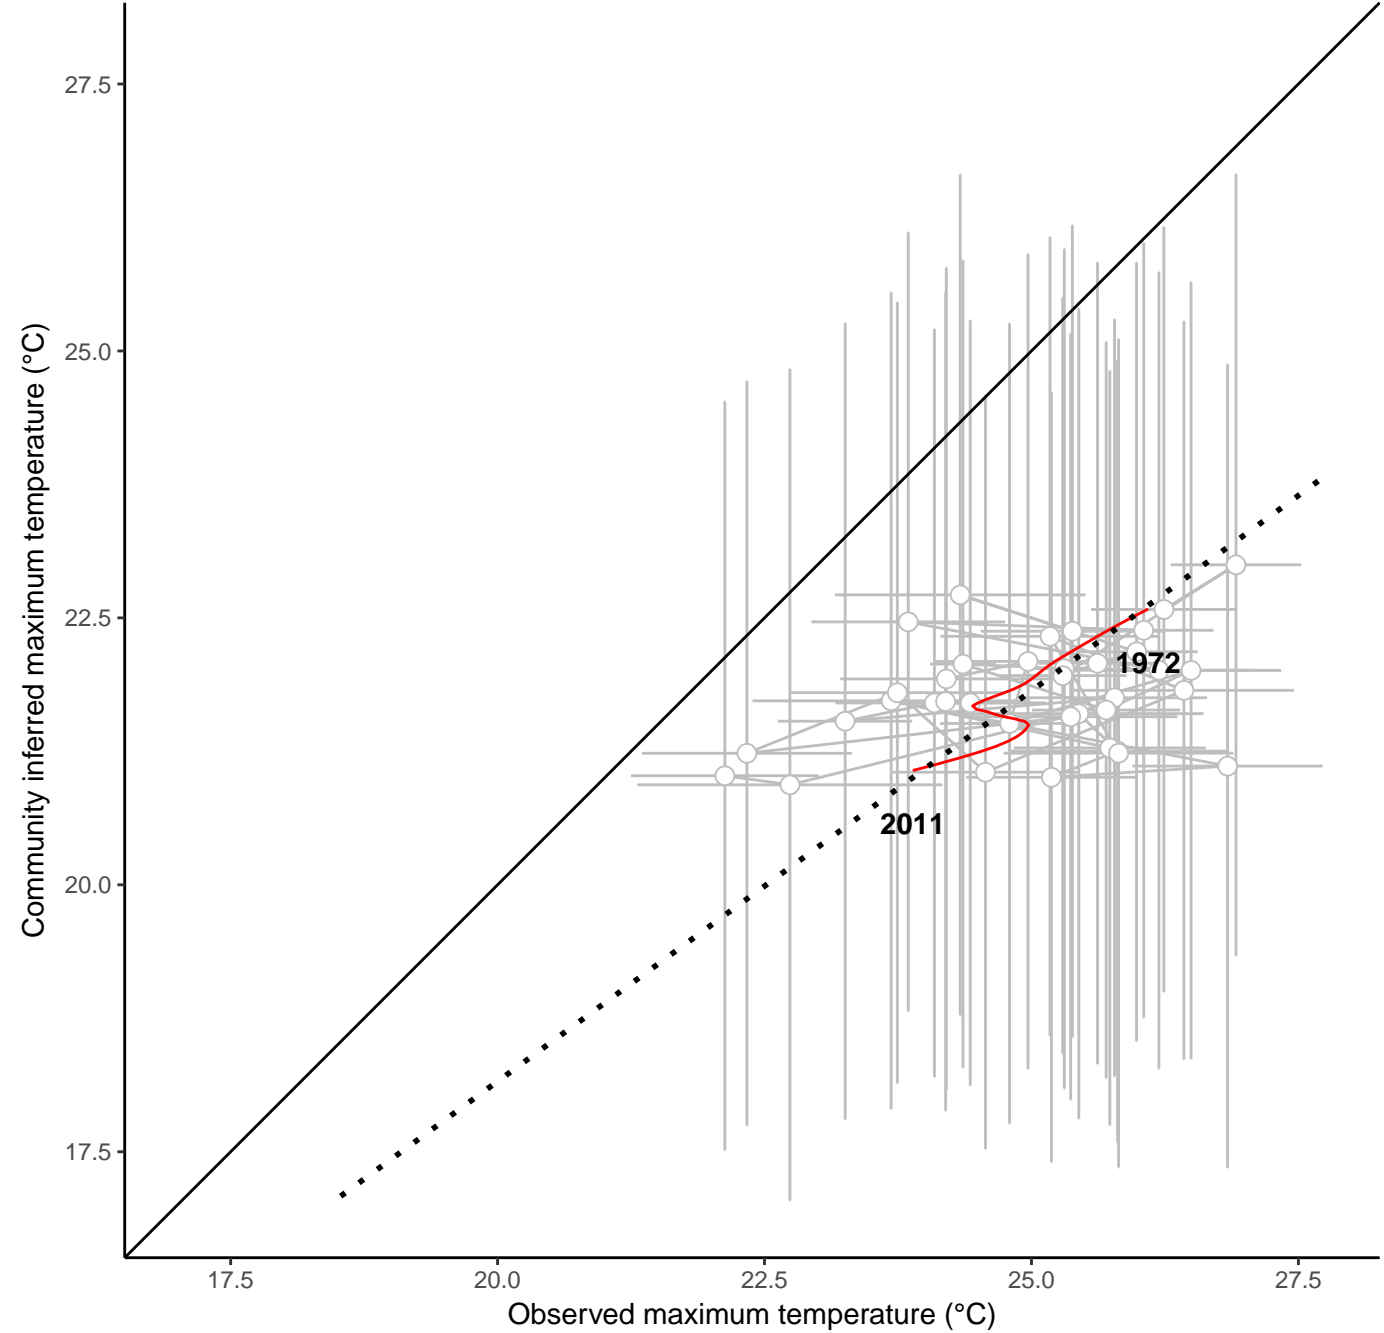

site : 840\_14\_71

absolute deviation = 0.79 | deviation change = 0.15 | maximum state number = 1

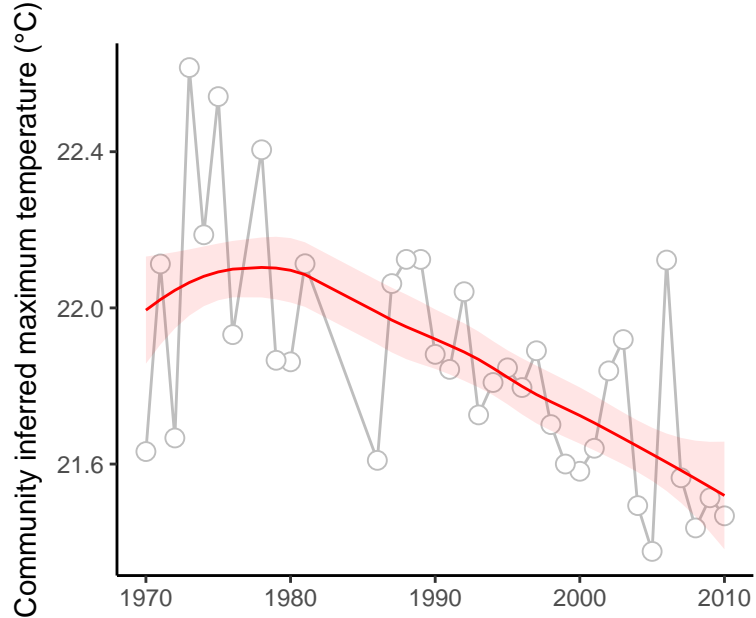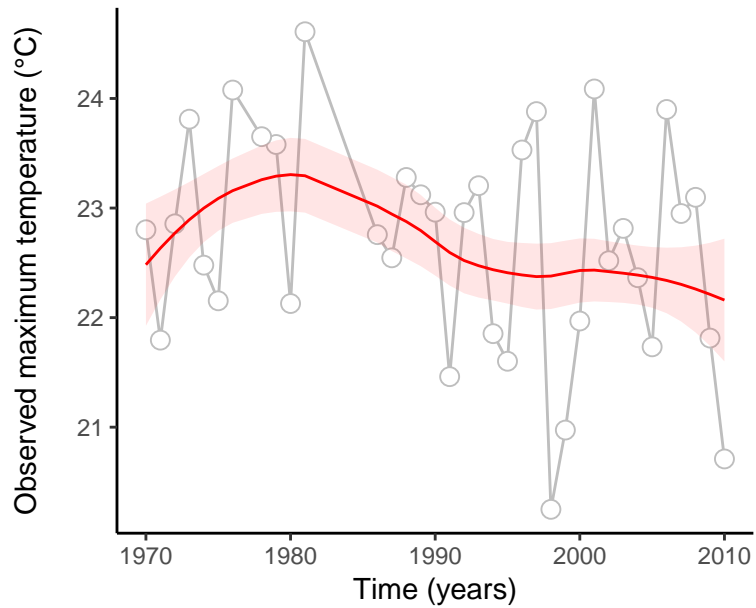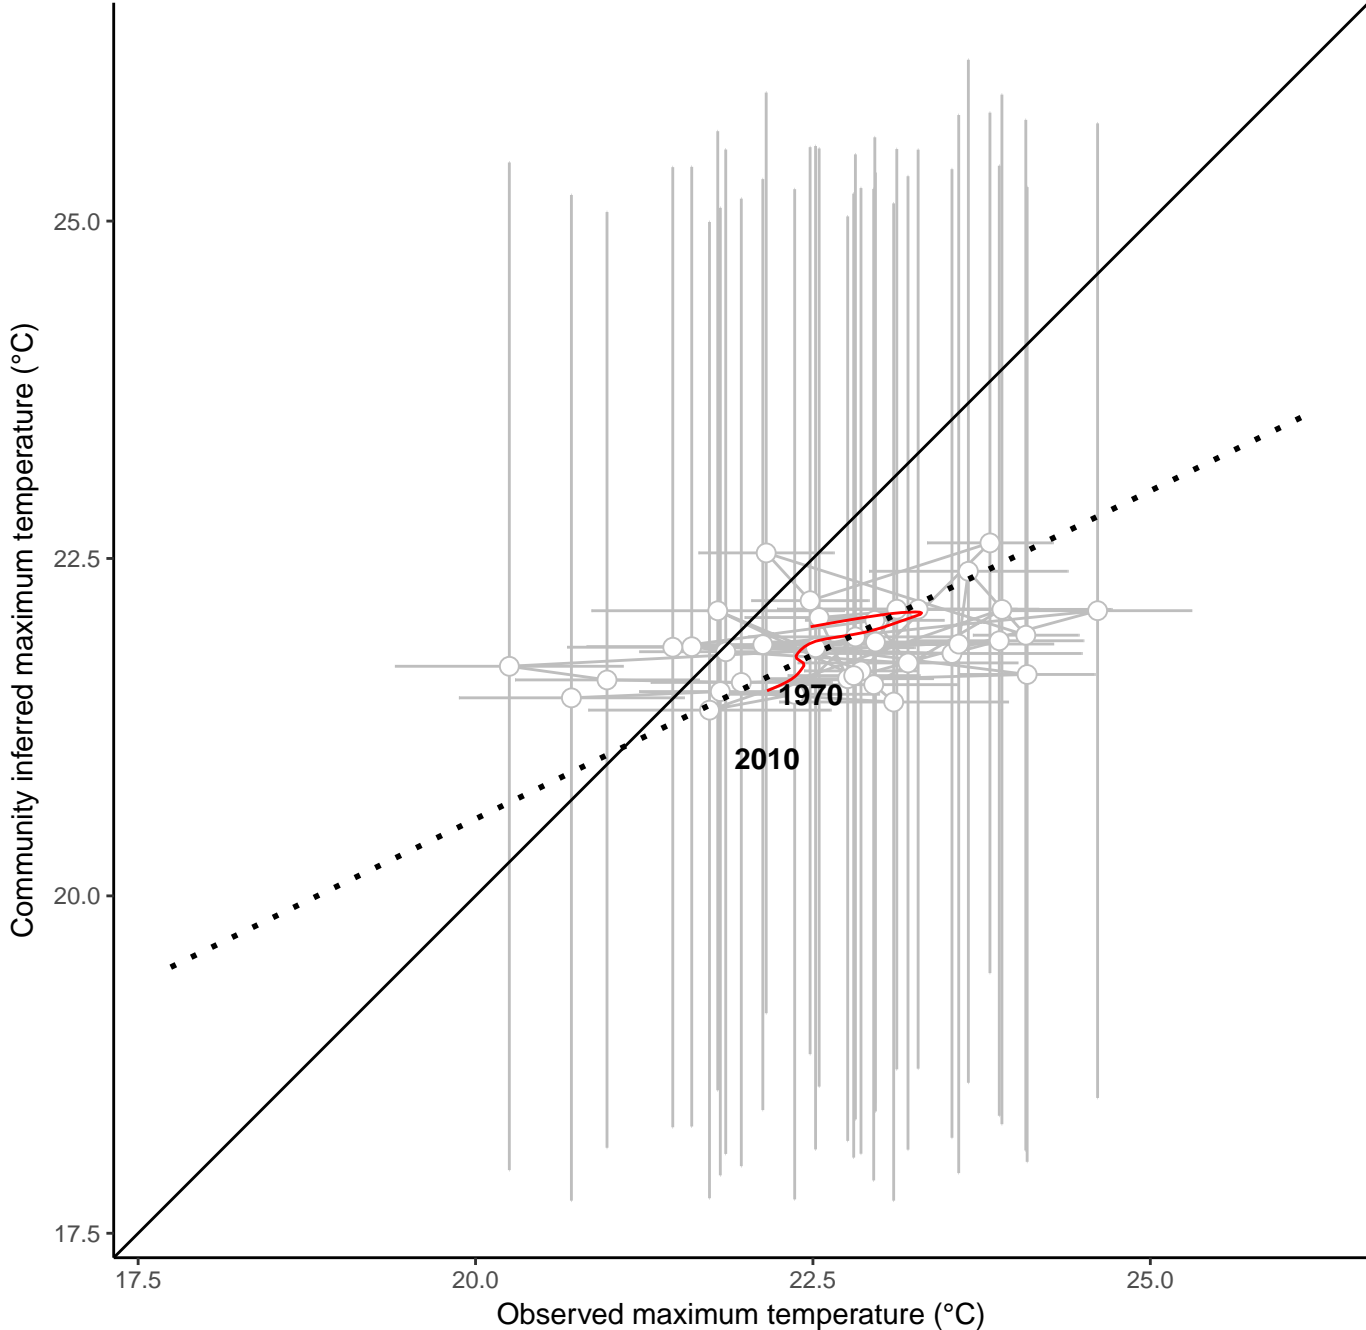

site : 840\_18\_5

absolute deviation = 0.96 | deviation change = 0.63 | maximum state number = 1

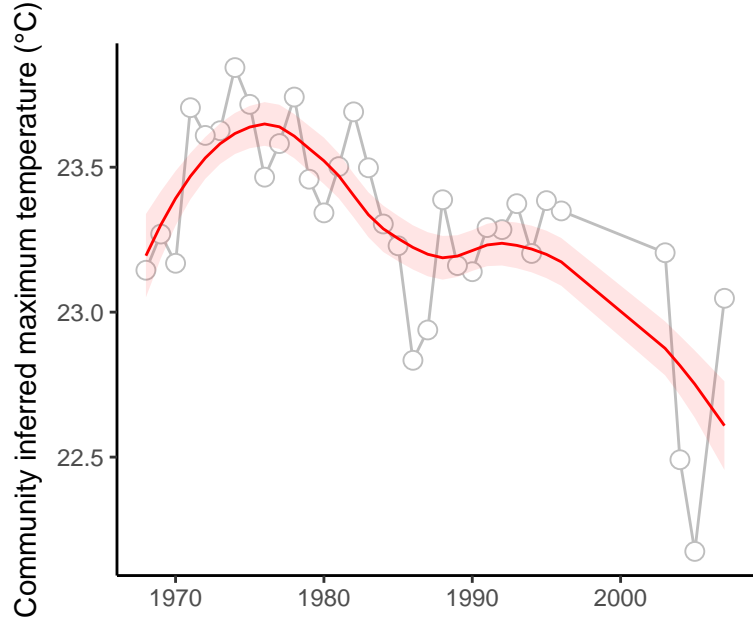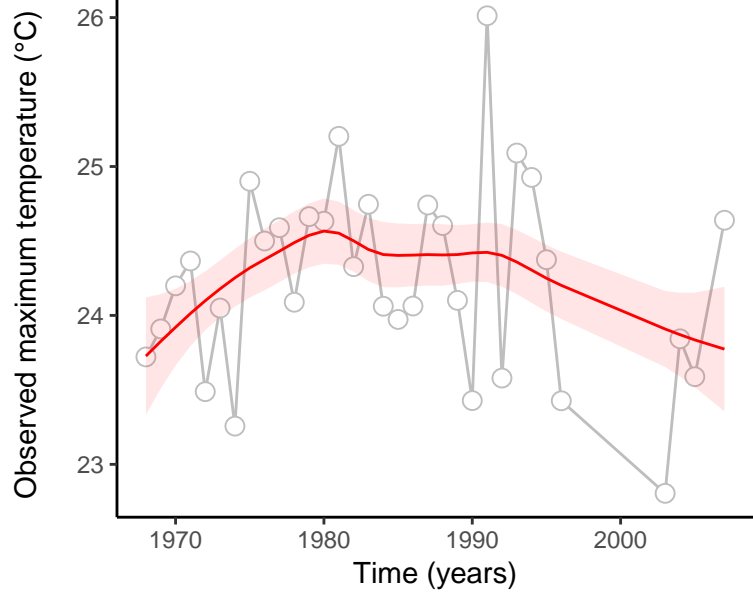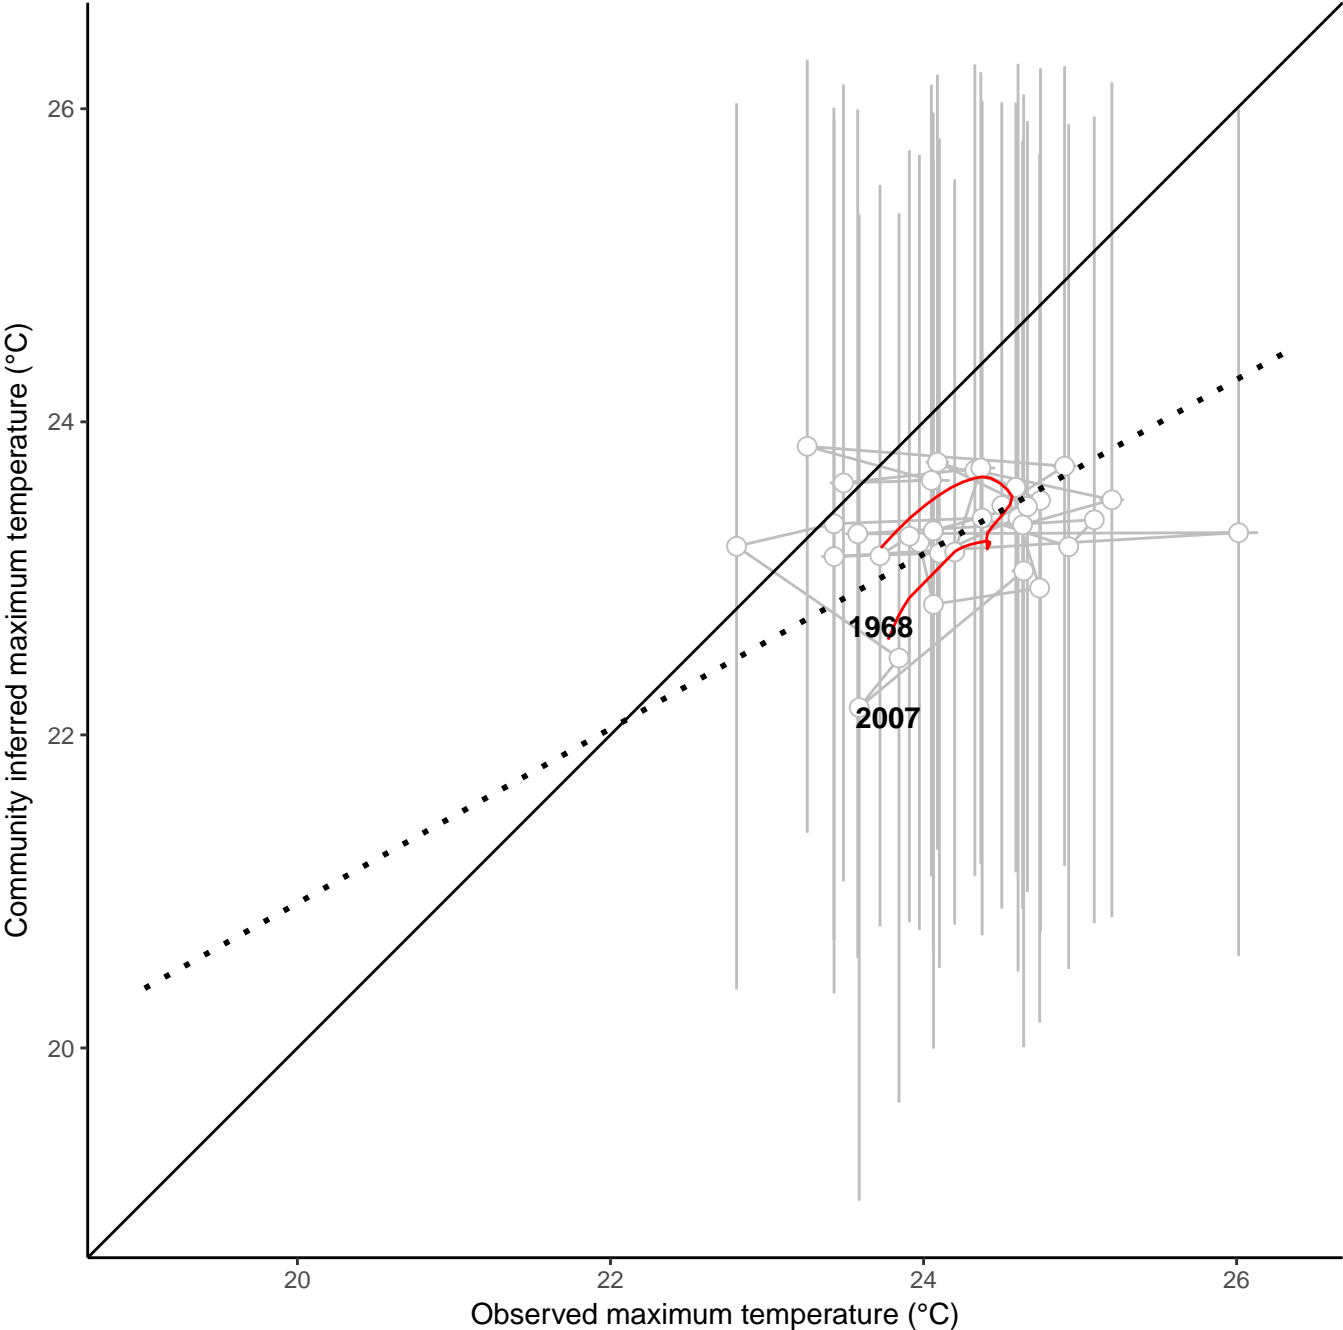

site : 840\_2\_28

absolute deviation = 4.39 | deviation change = 0.74 | maximum state number = 1

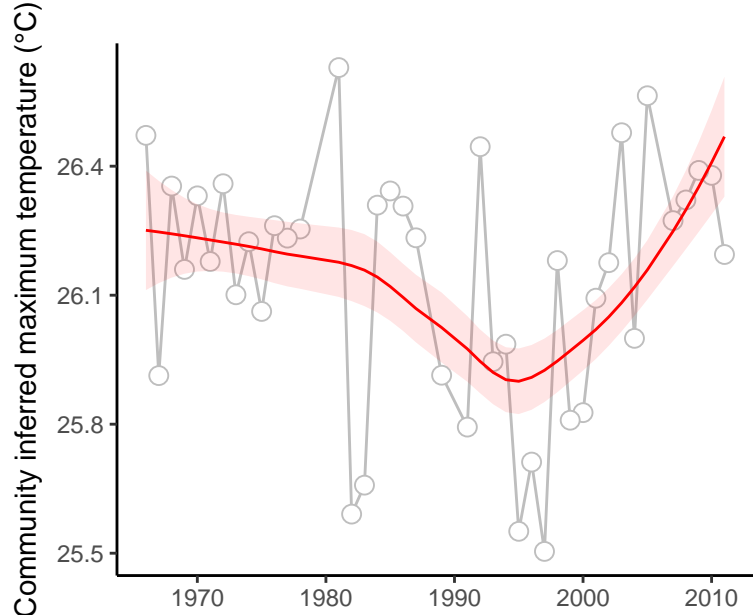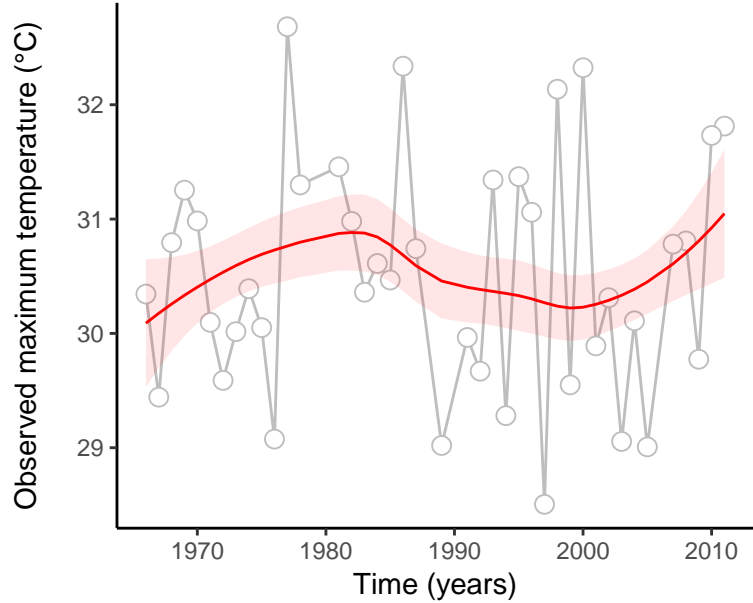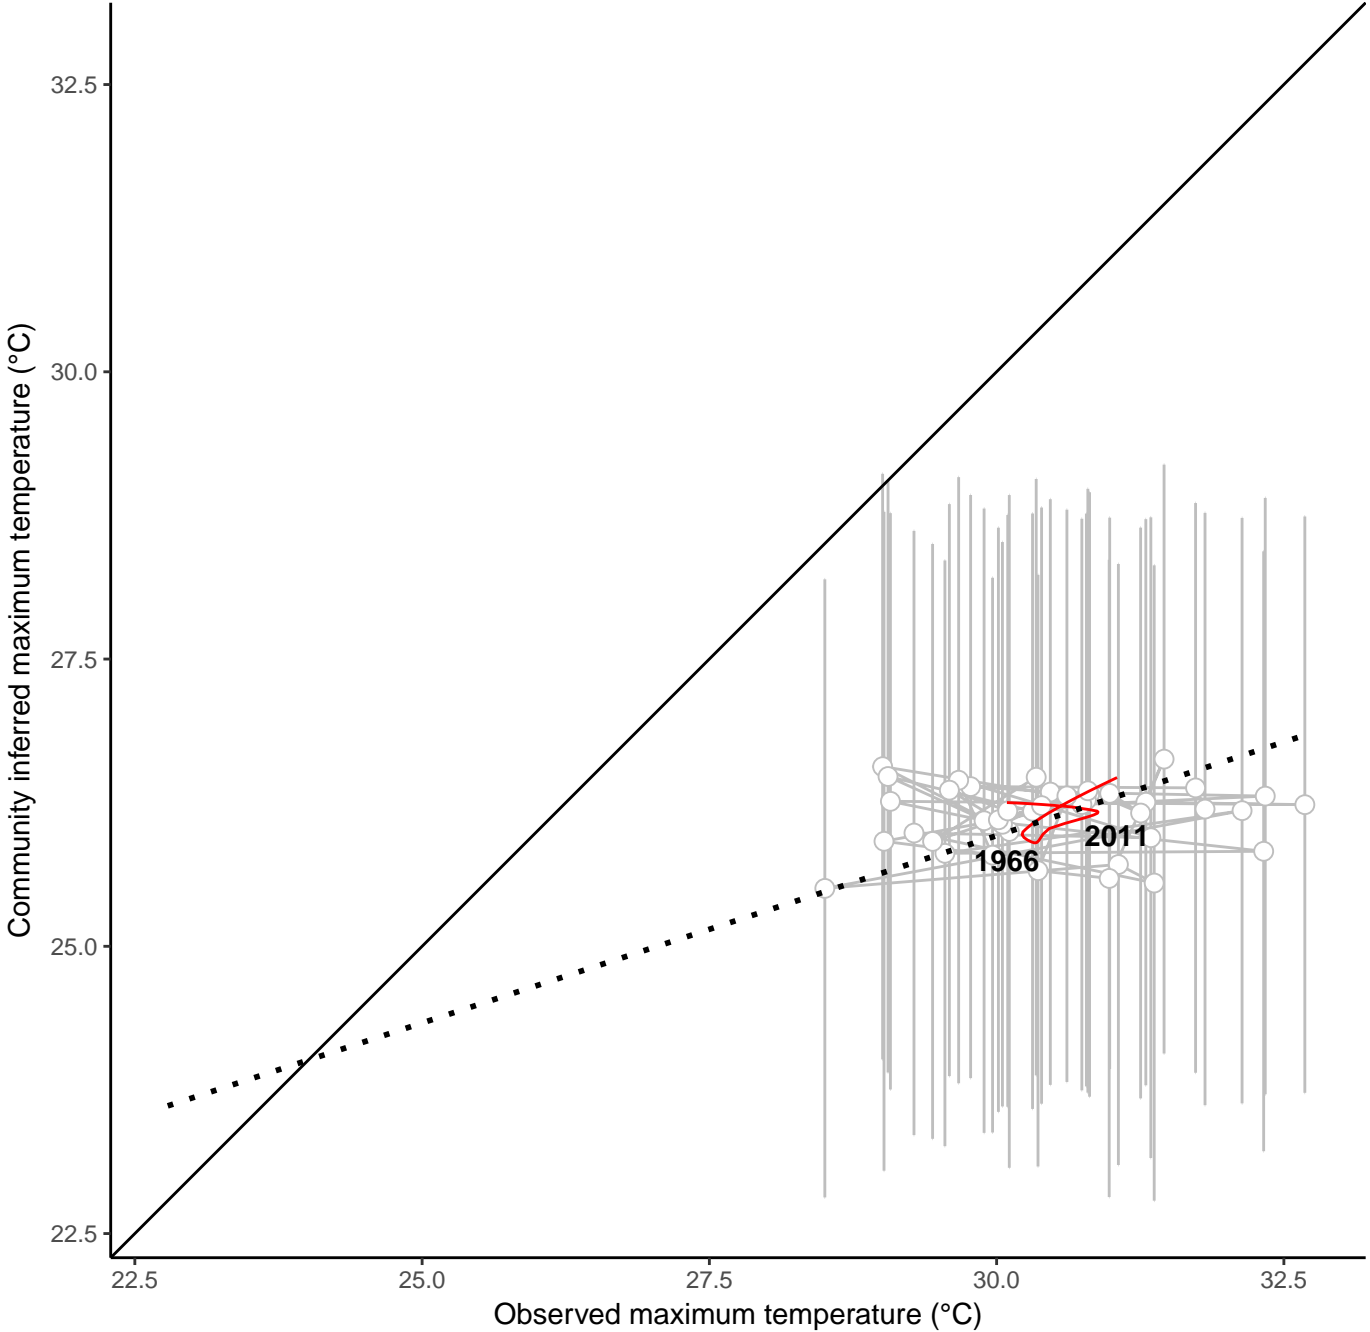

site : 840\_44\_9

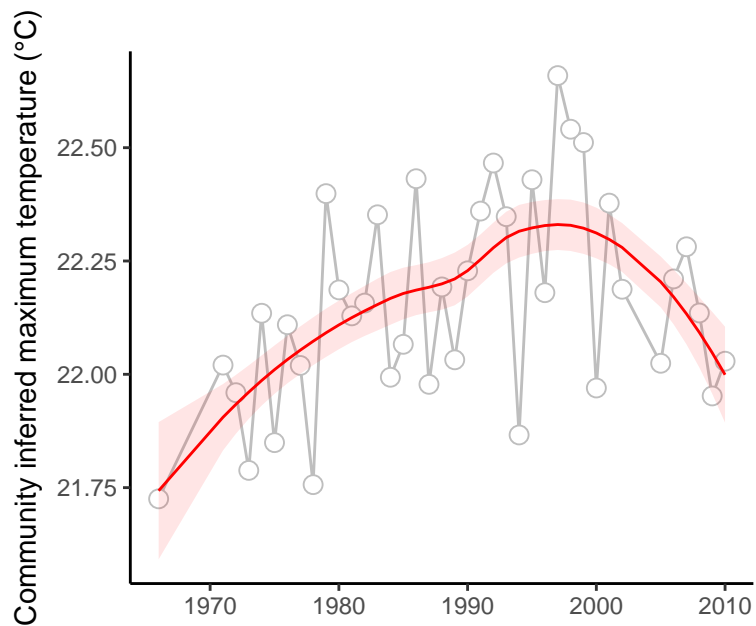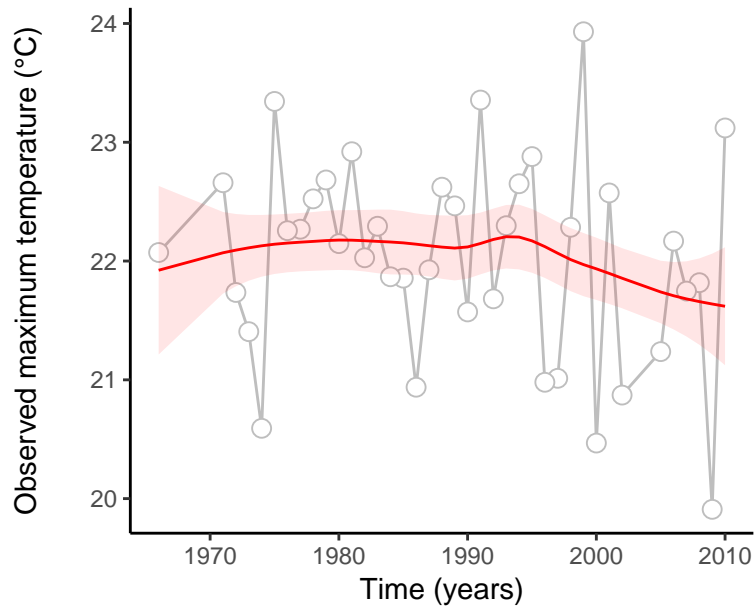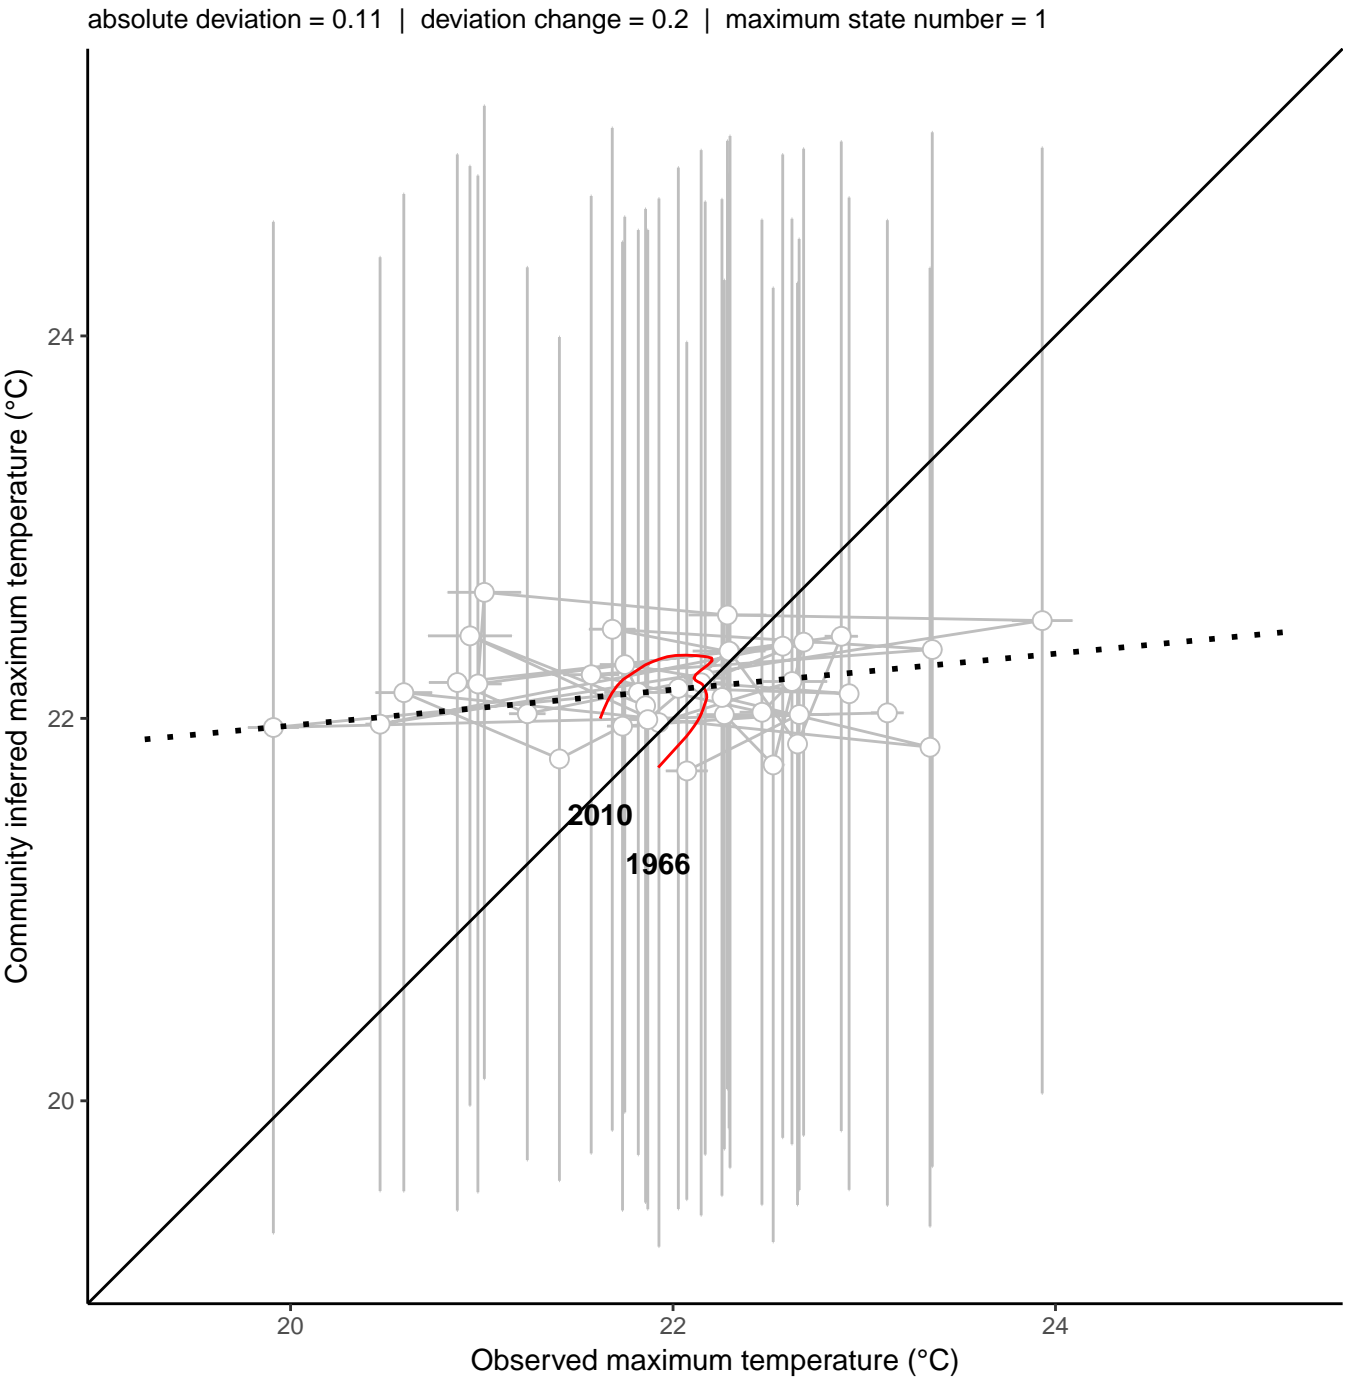

site : 840\_51\_2

absolute deviation = 4.8 | deviation change = 0.65 | maximum state number = 1

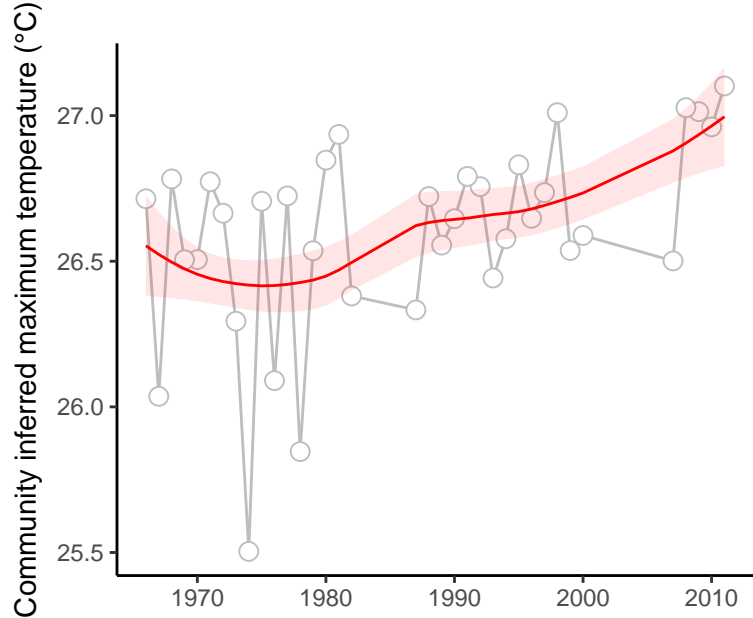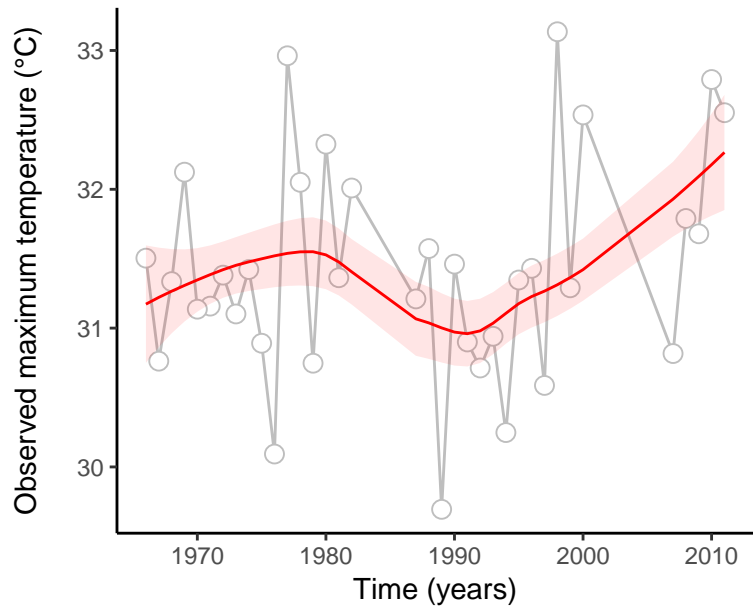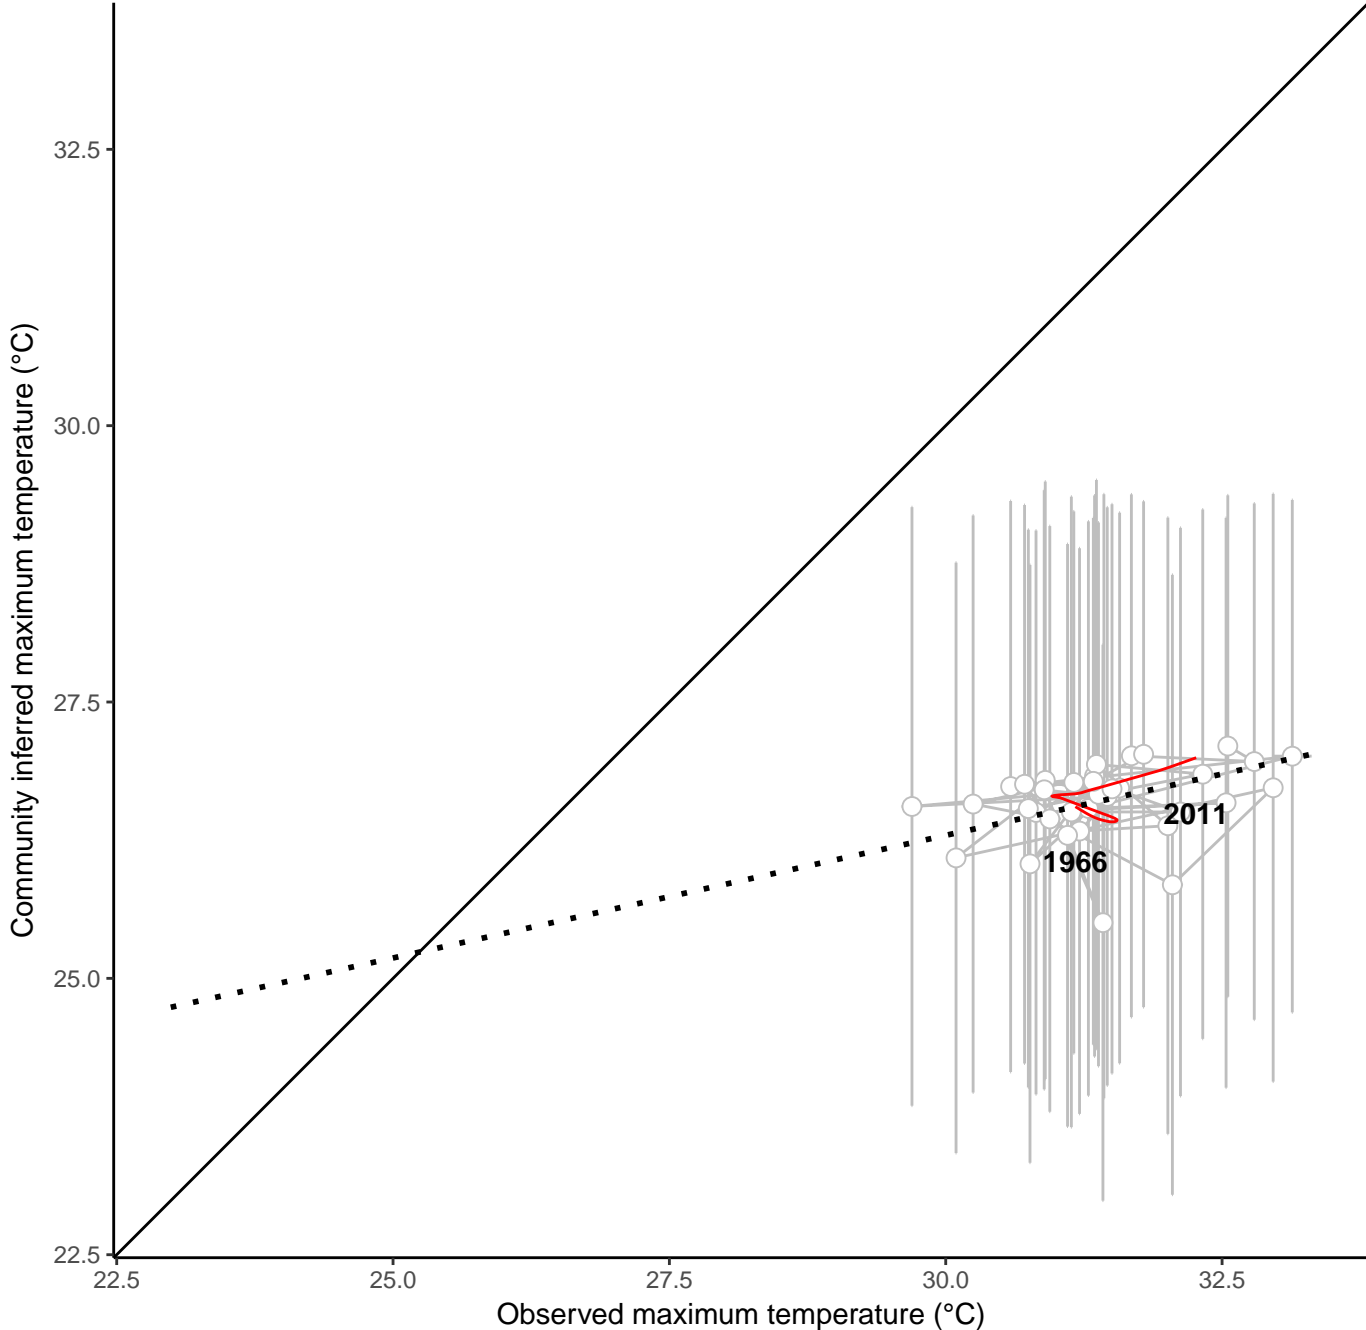

site : 840\_52\_20

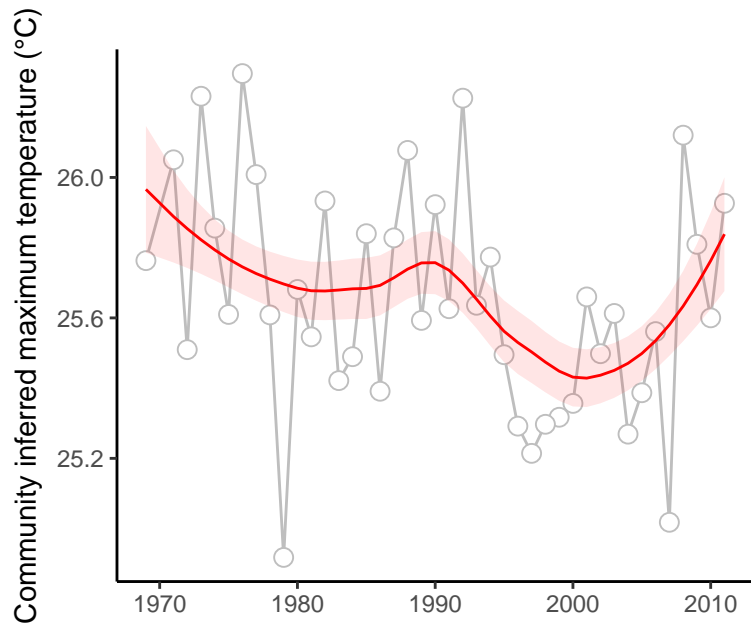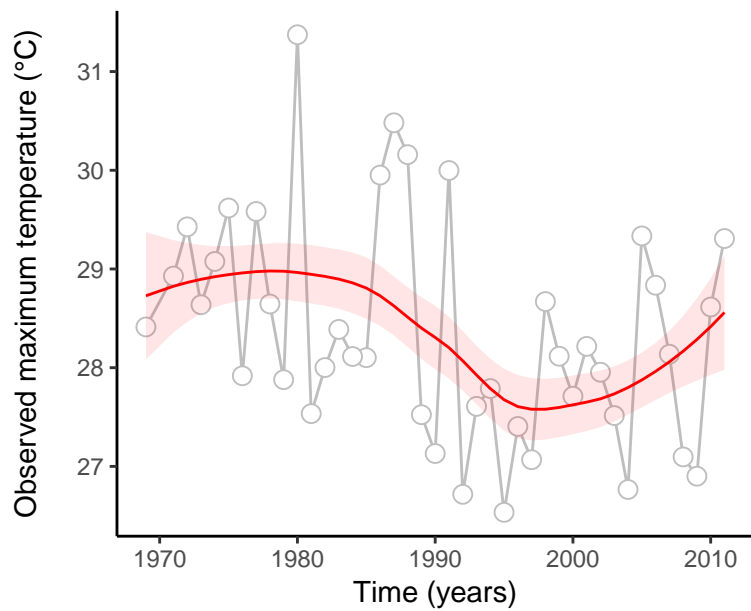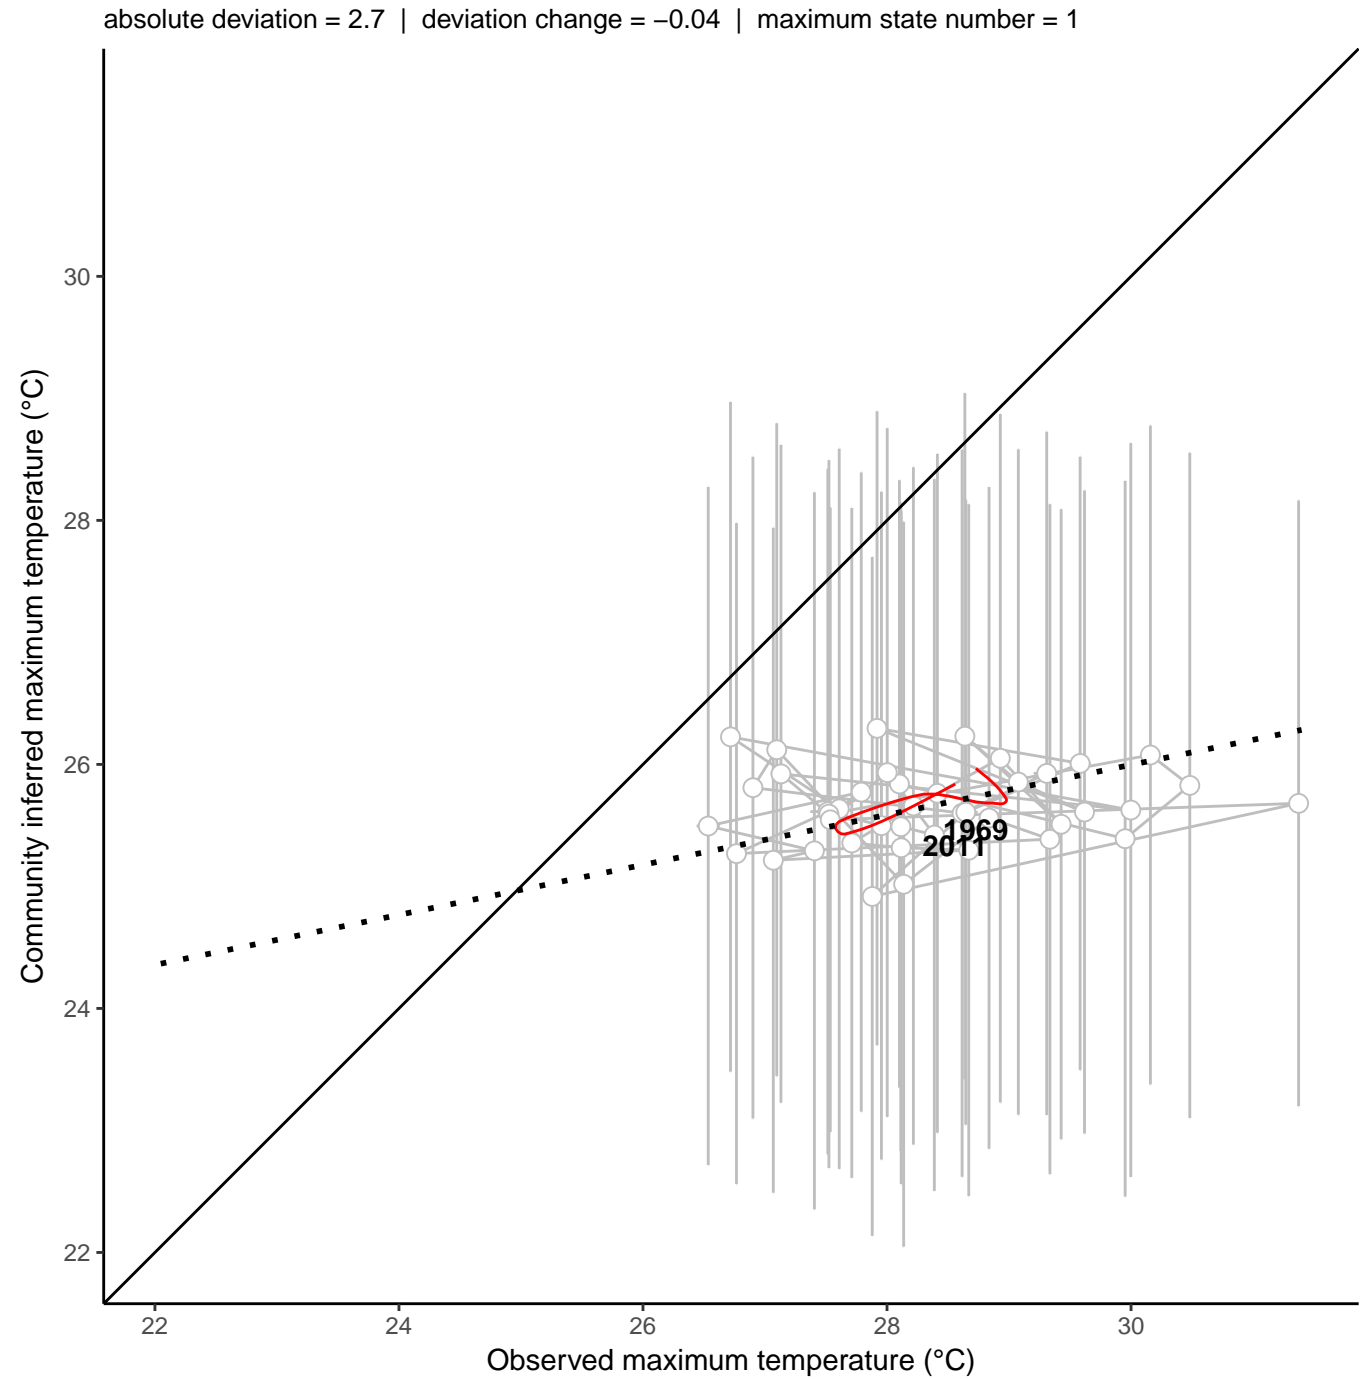



site : 840\_60\_4

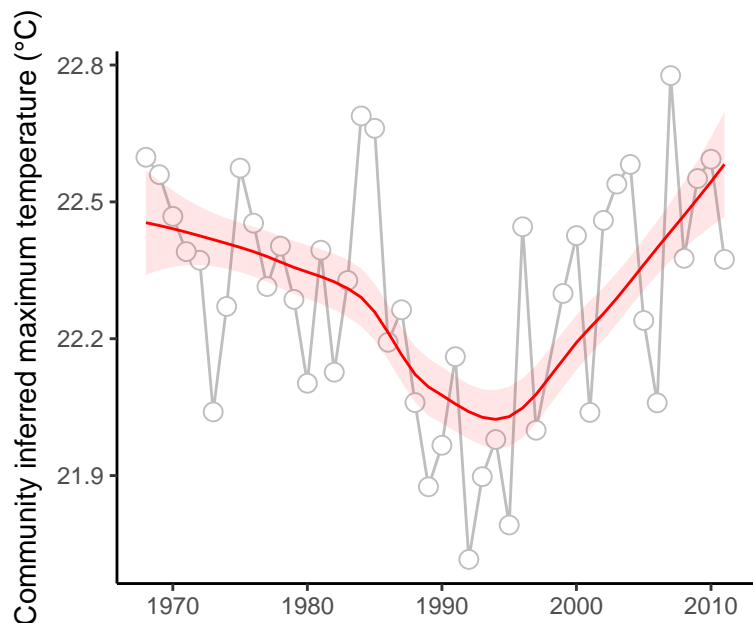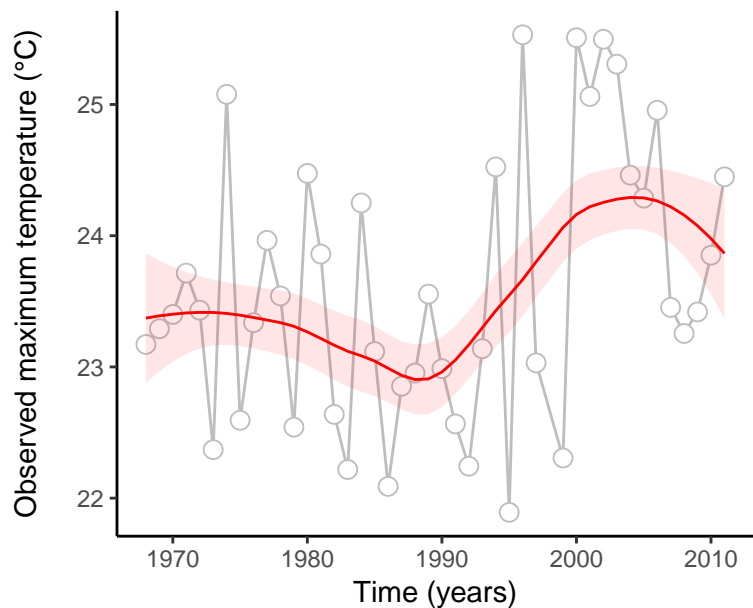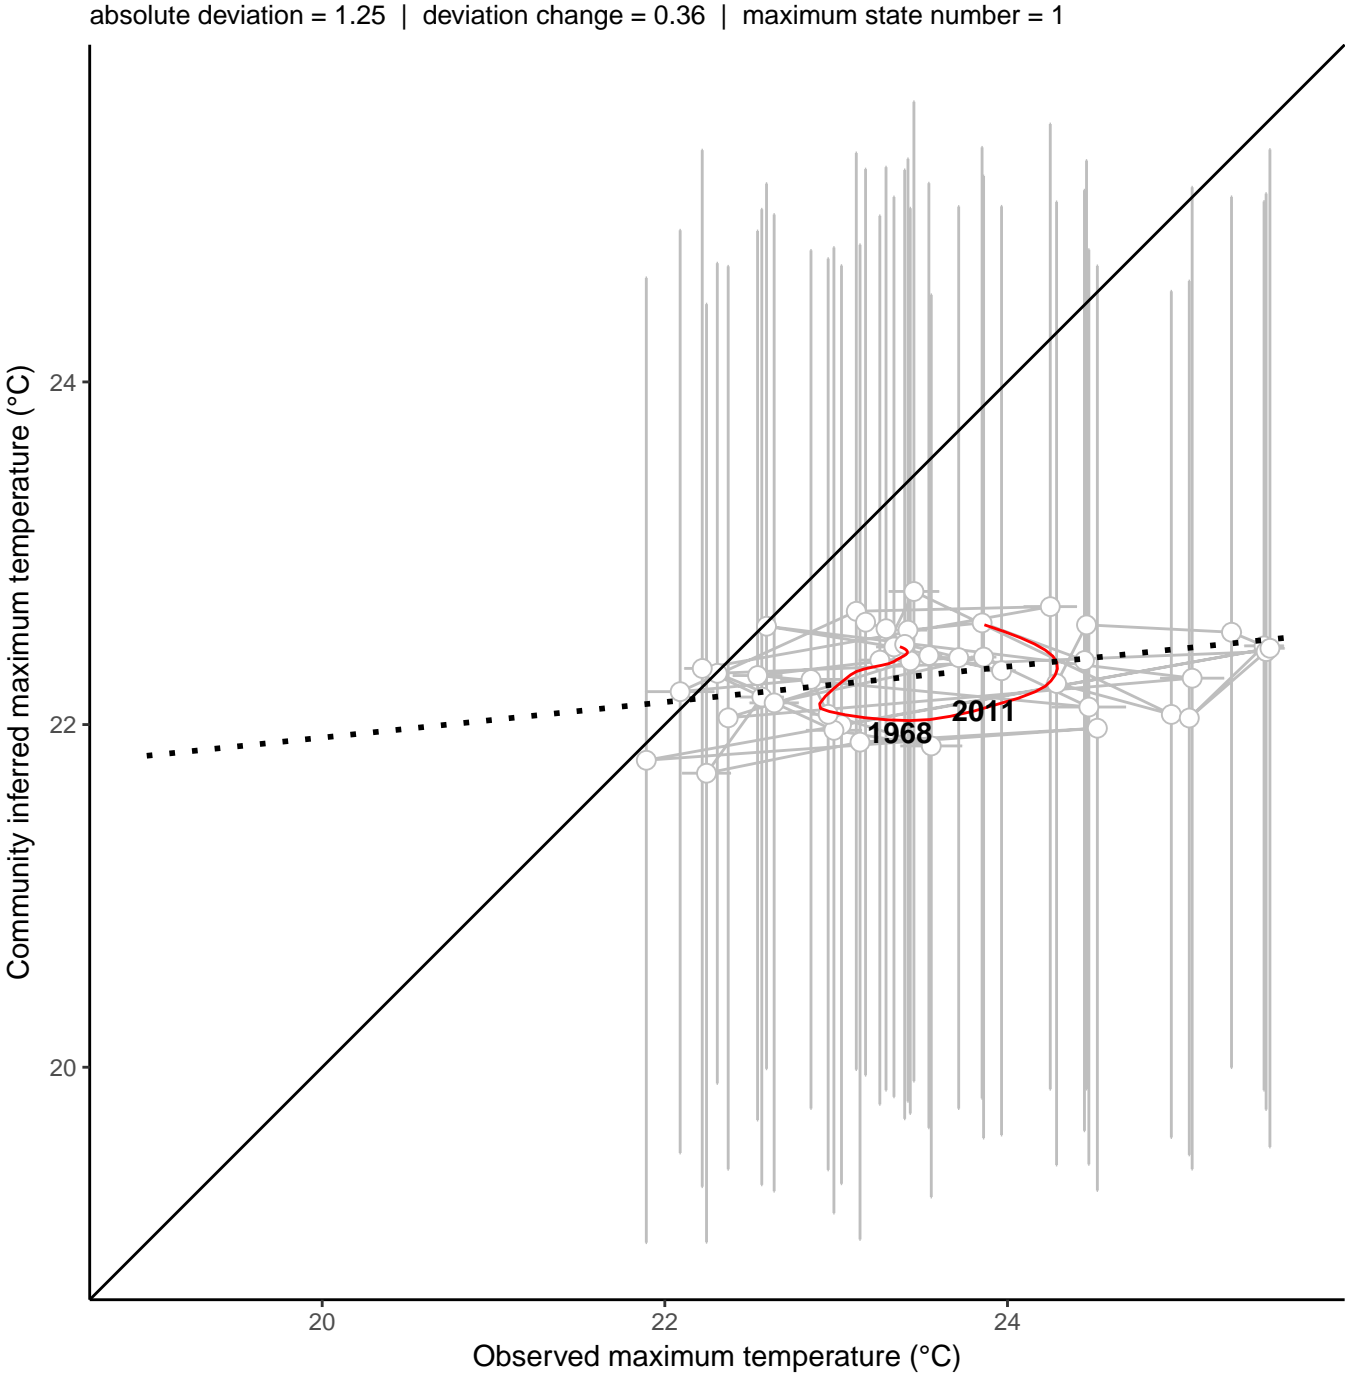

site : 840\_61\_45

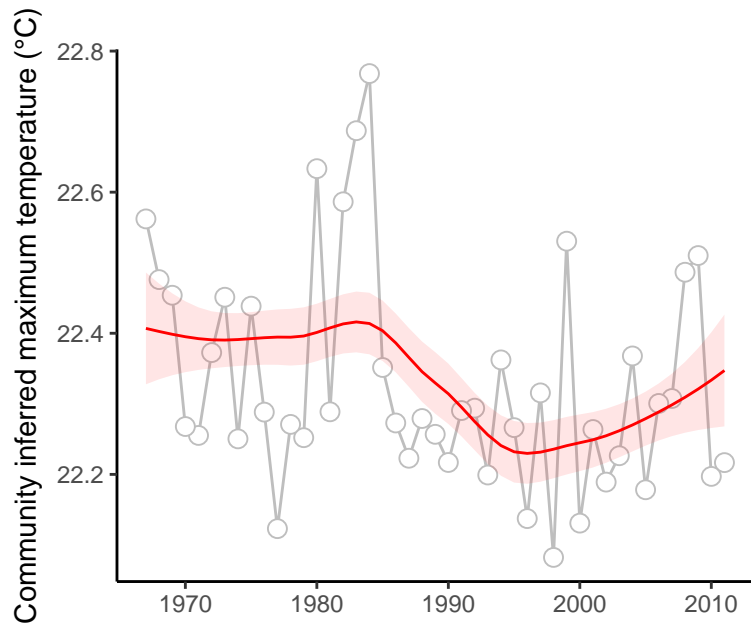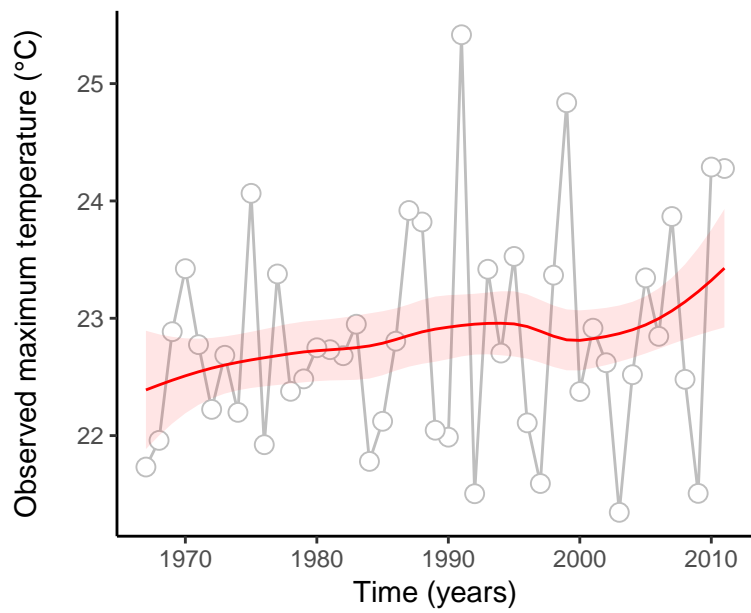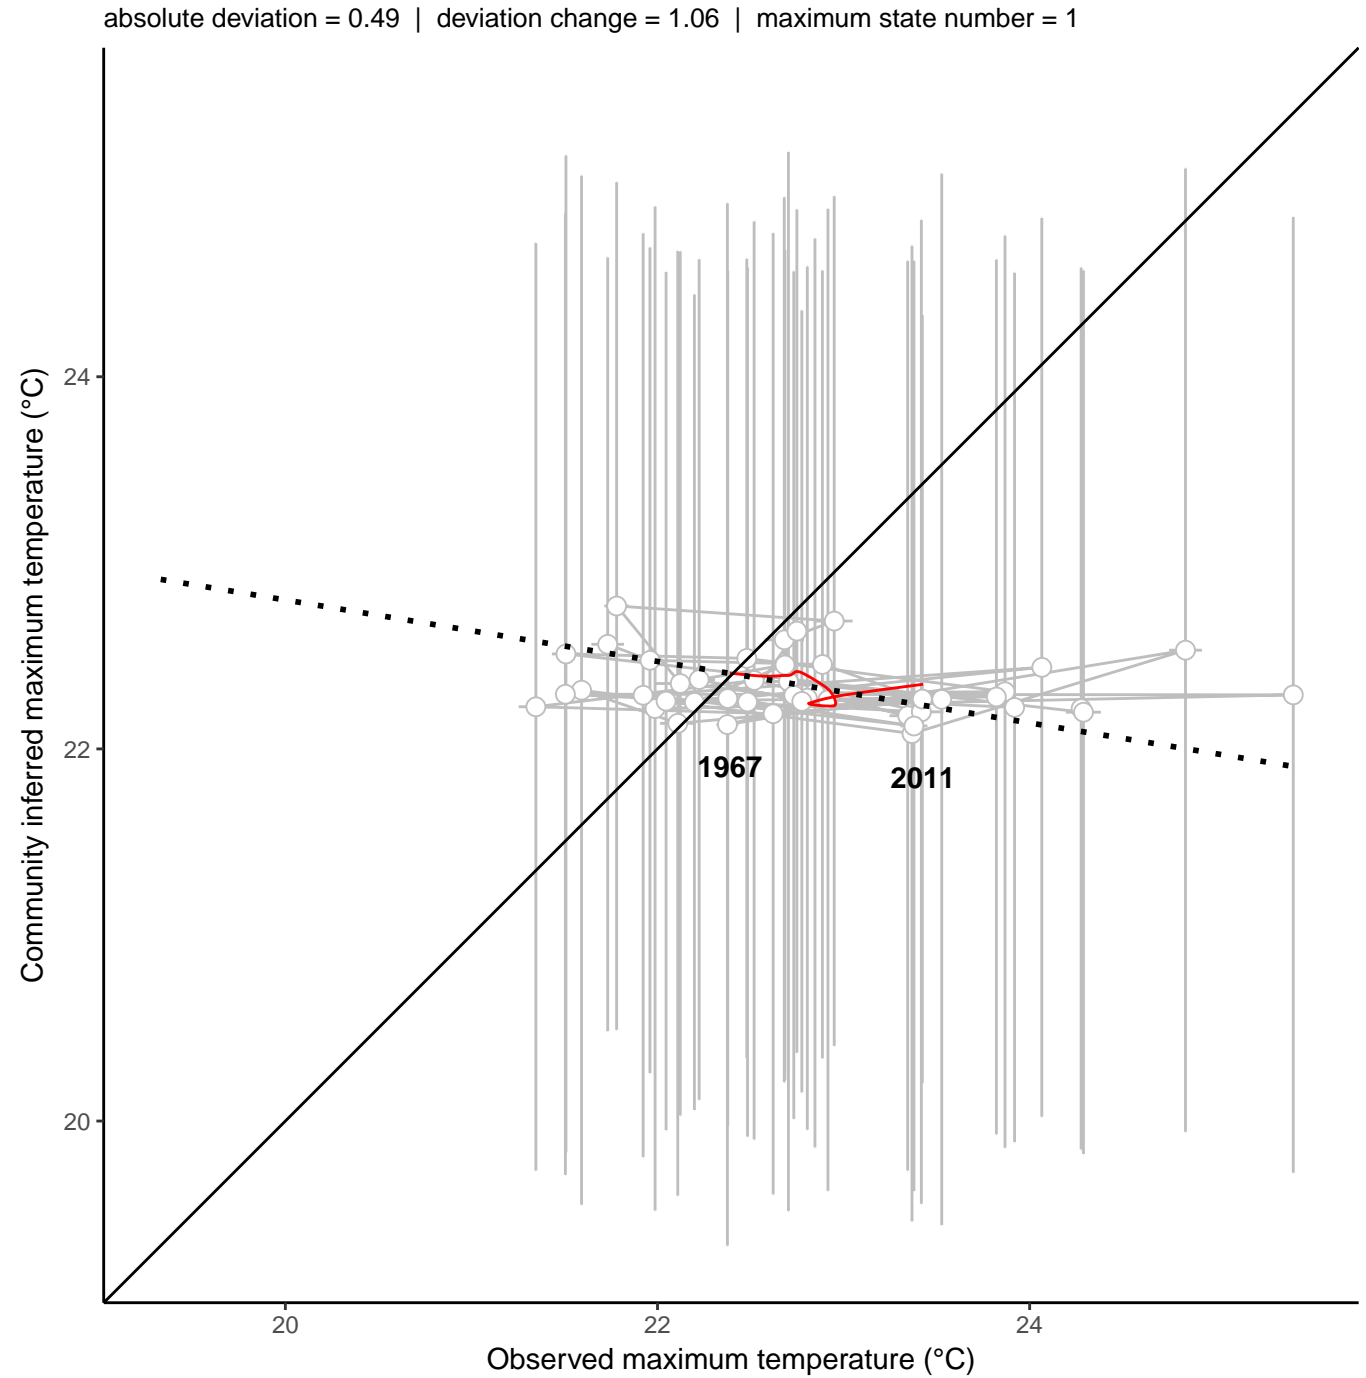

site : 840\_67\_13

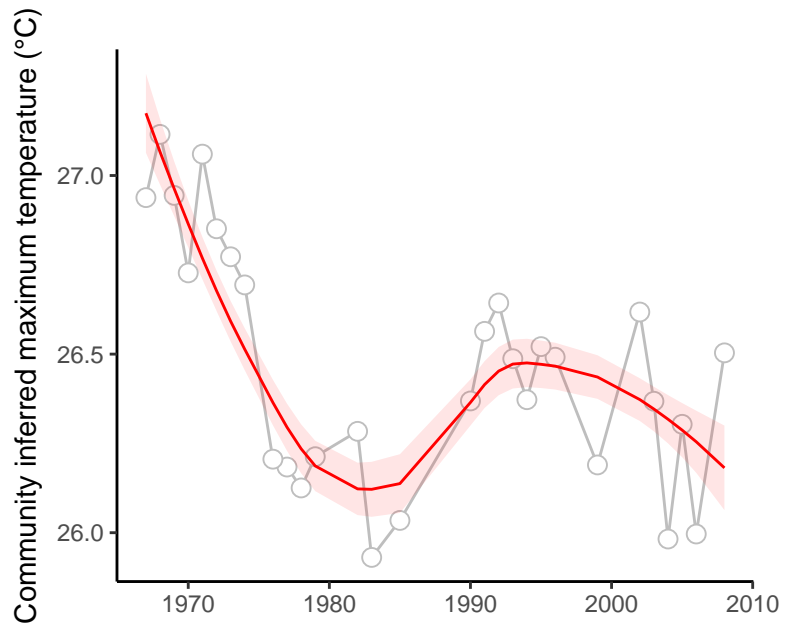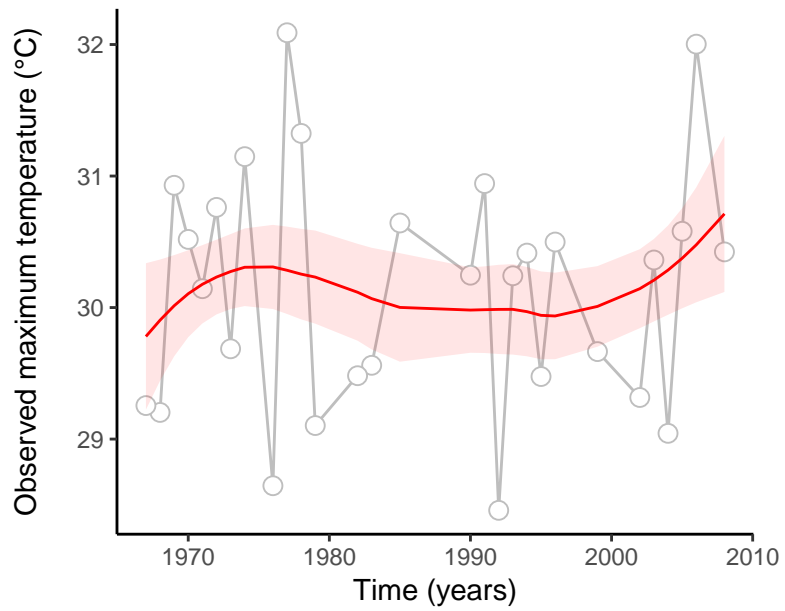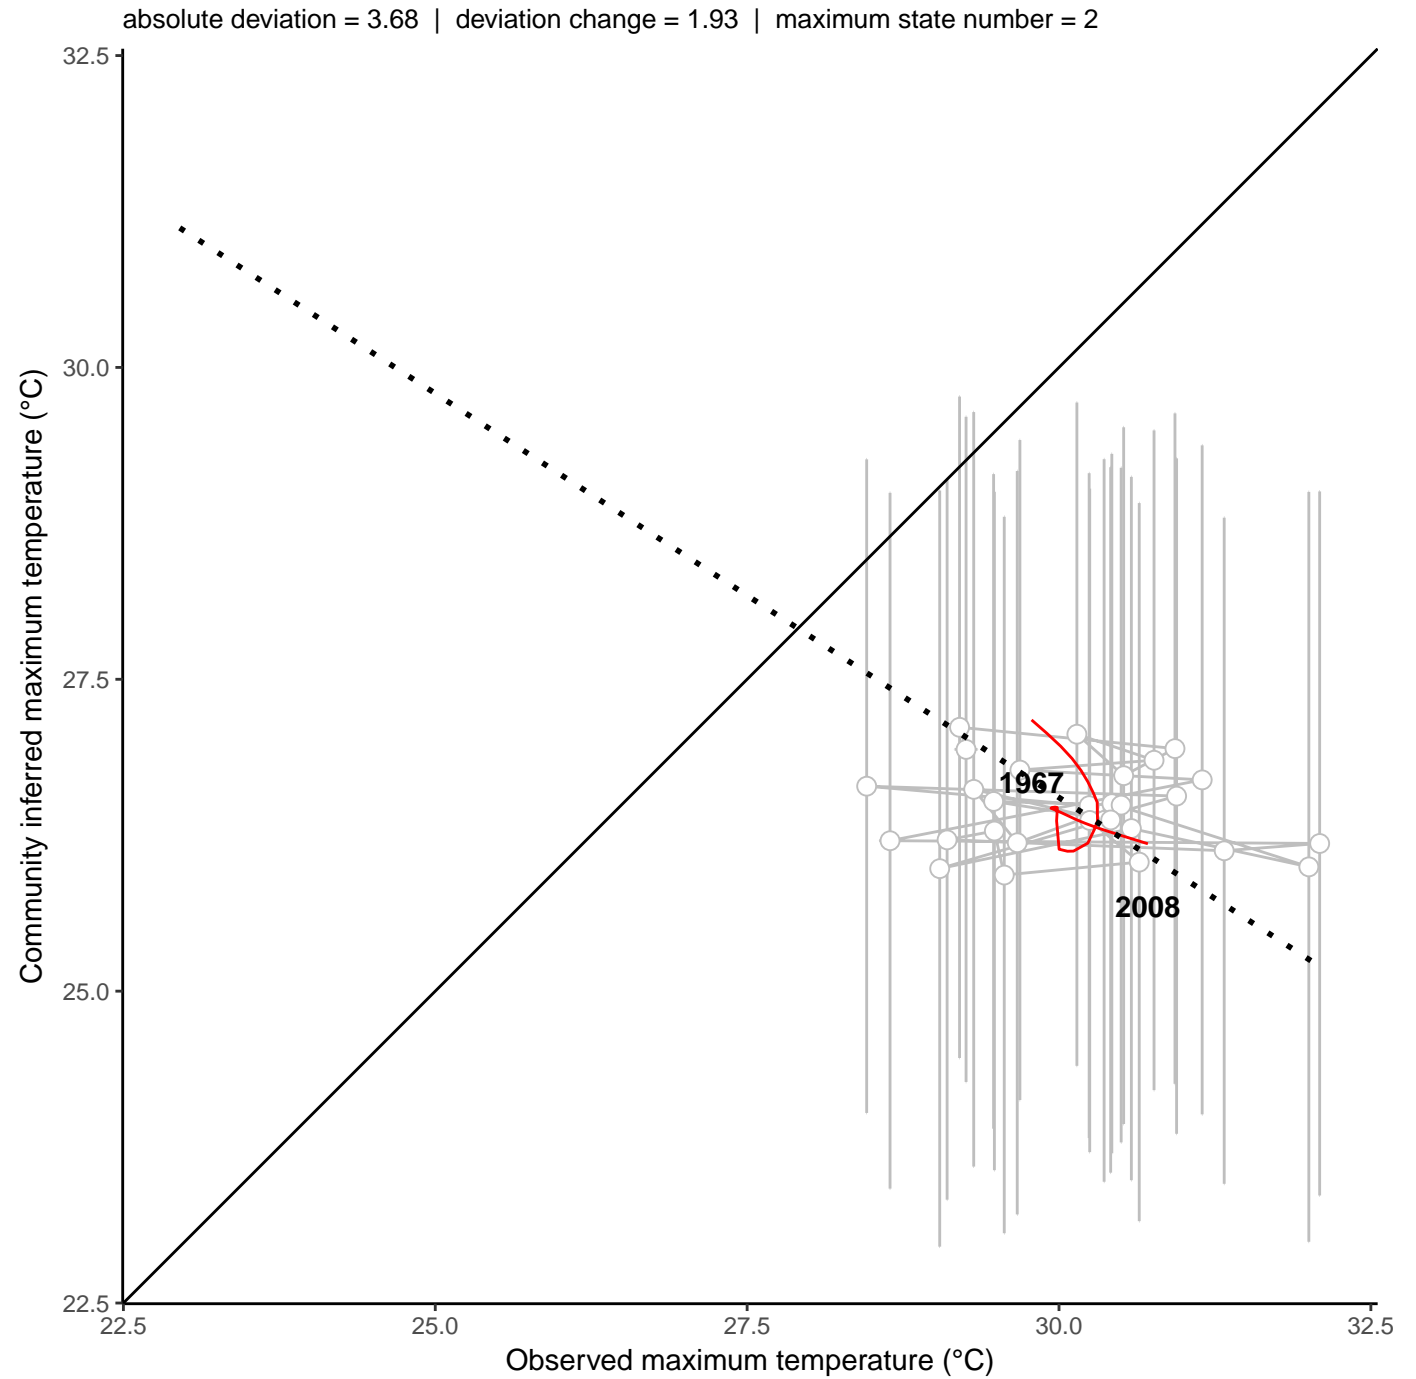

site : 840\_67\_4

absolute deviation = 4.07 | deviation change = 0.98 | maximum state number = 1

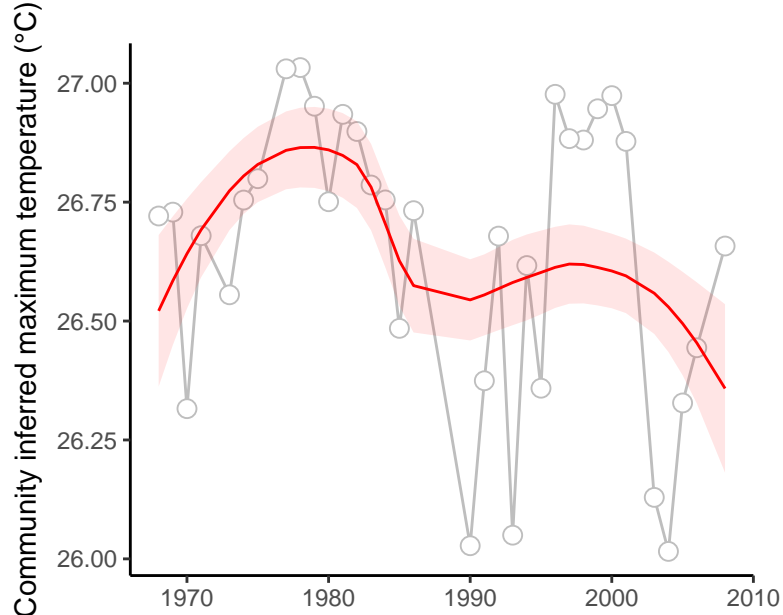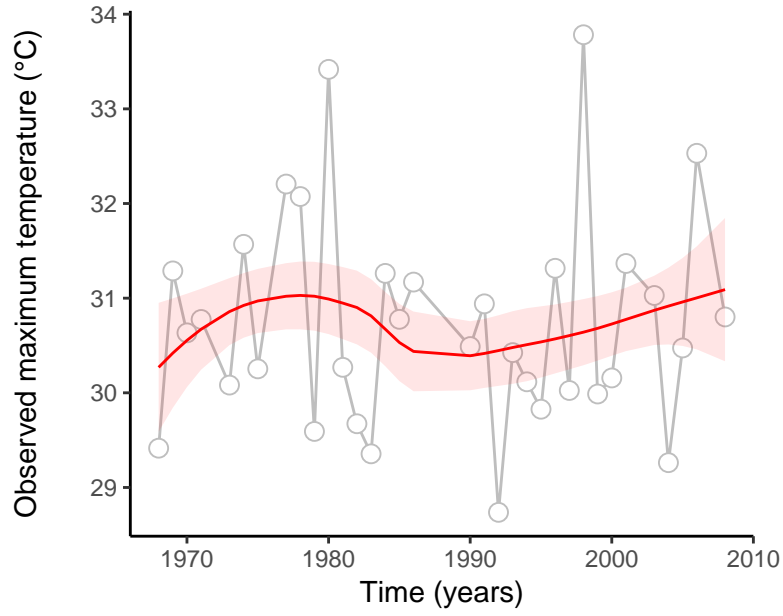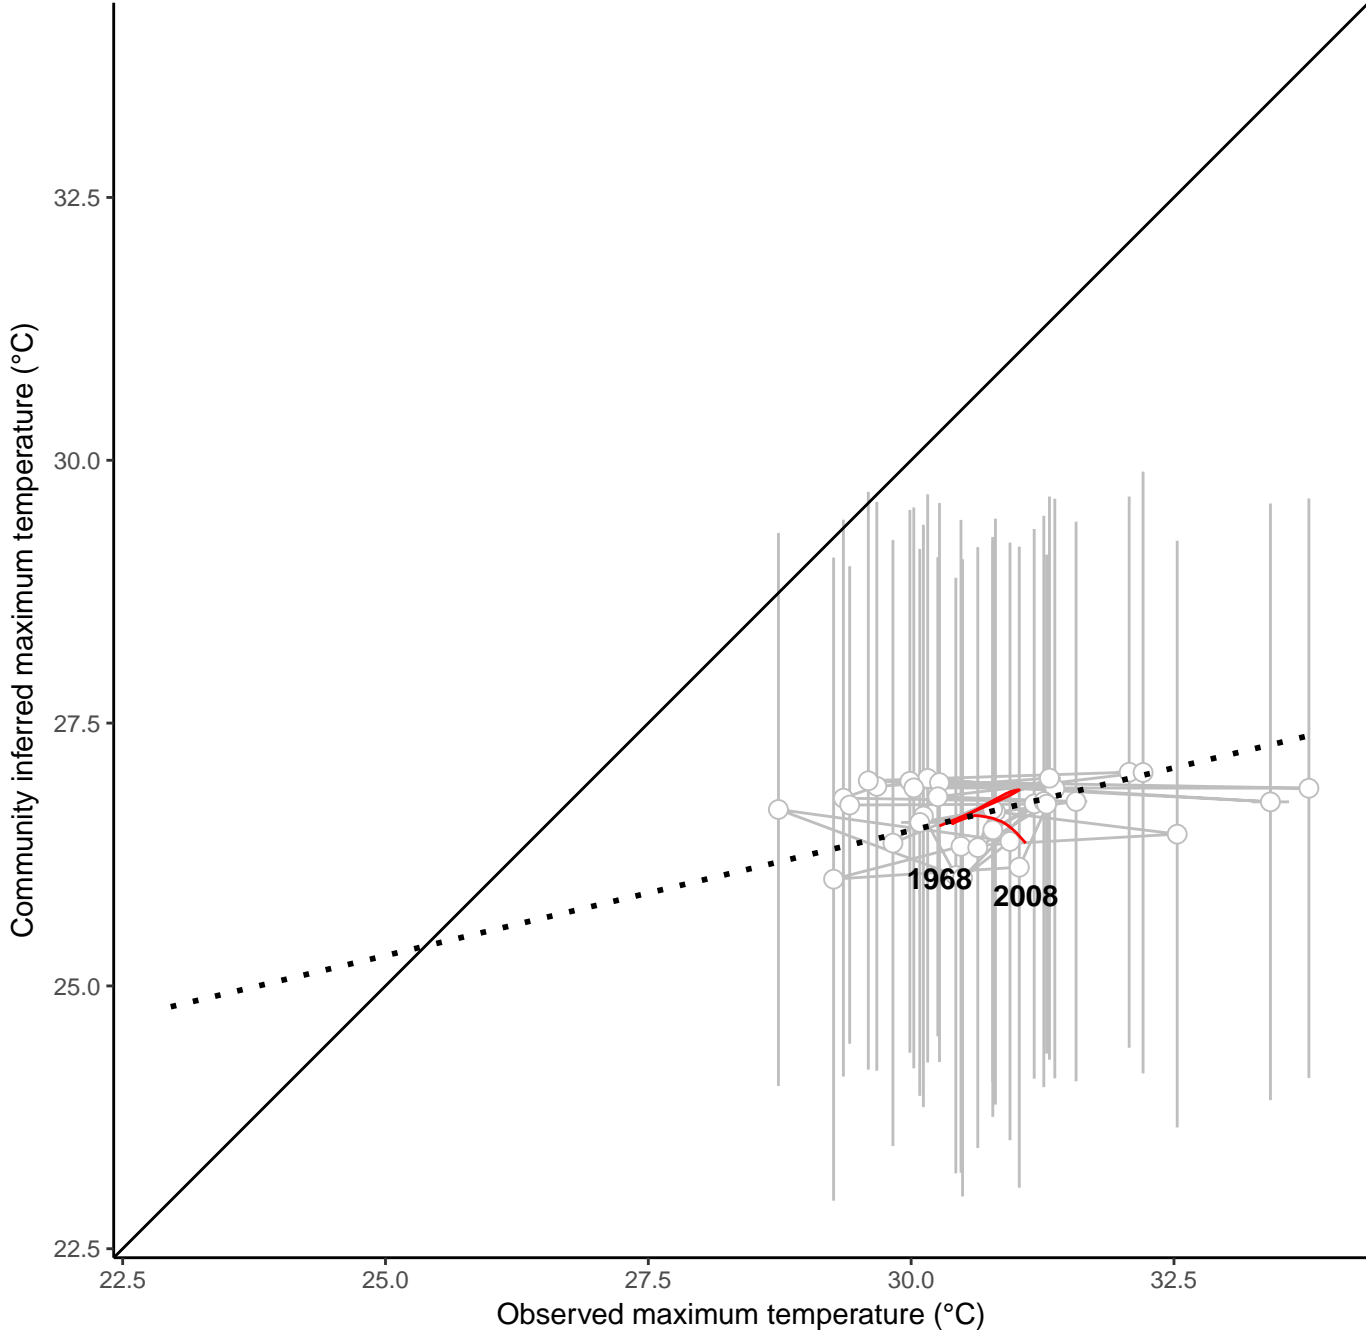

site : 840\_69\_35

absolute deviation = 1.8 | deviation change = -0.24 | maximum state number = 1

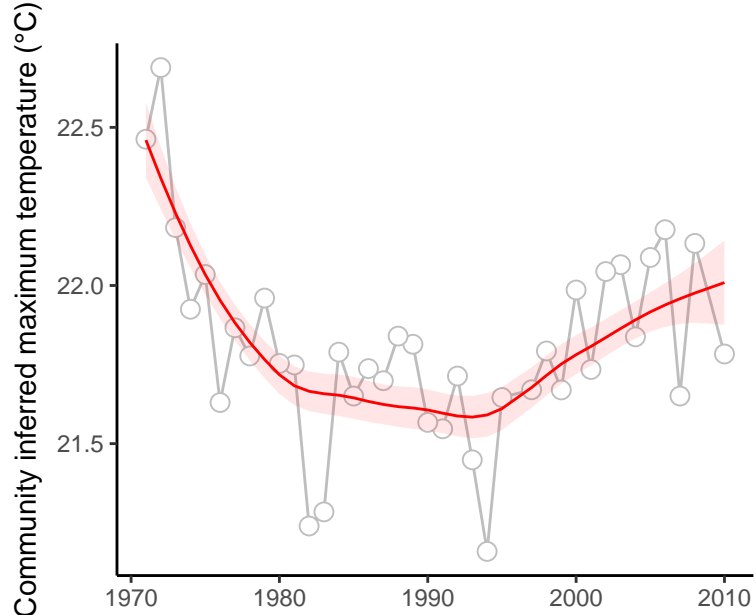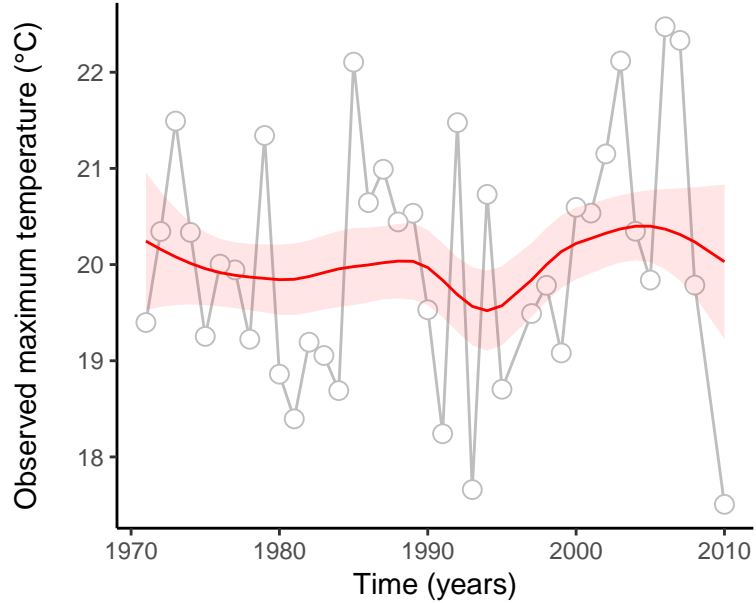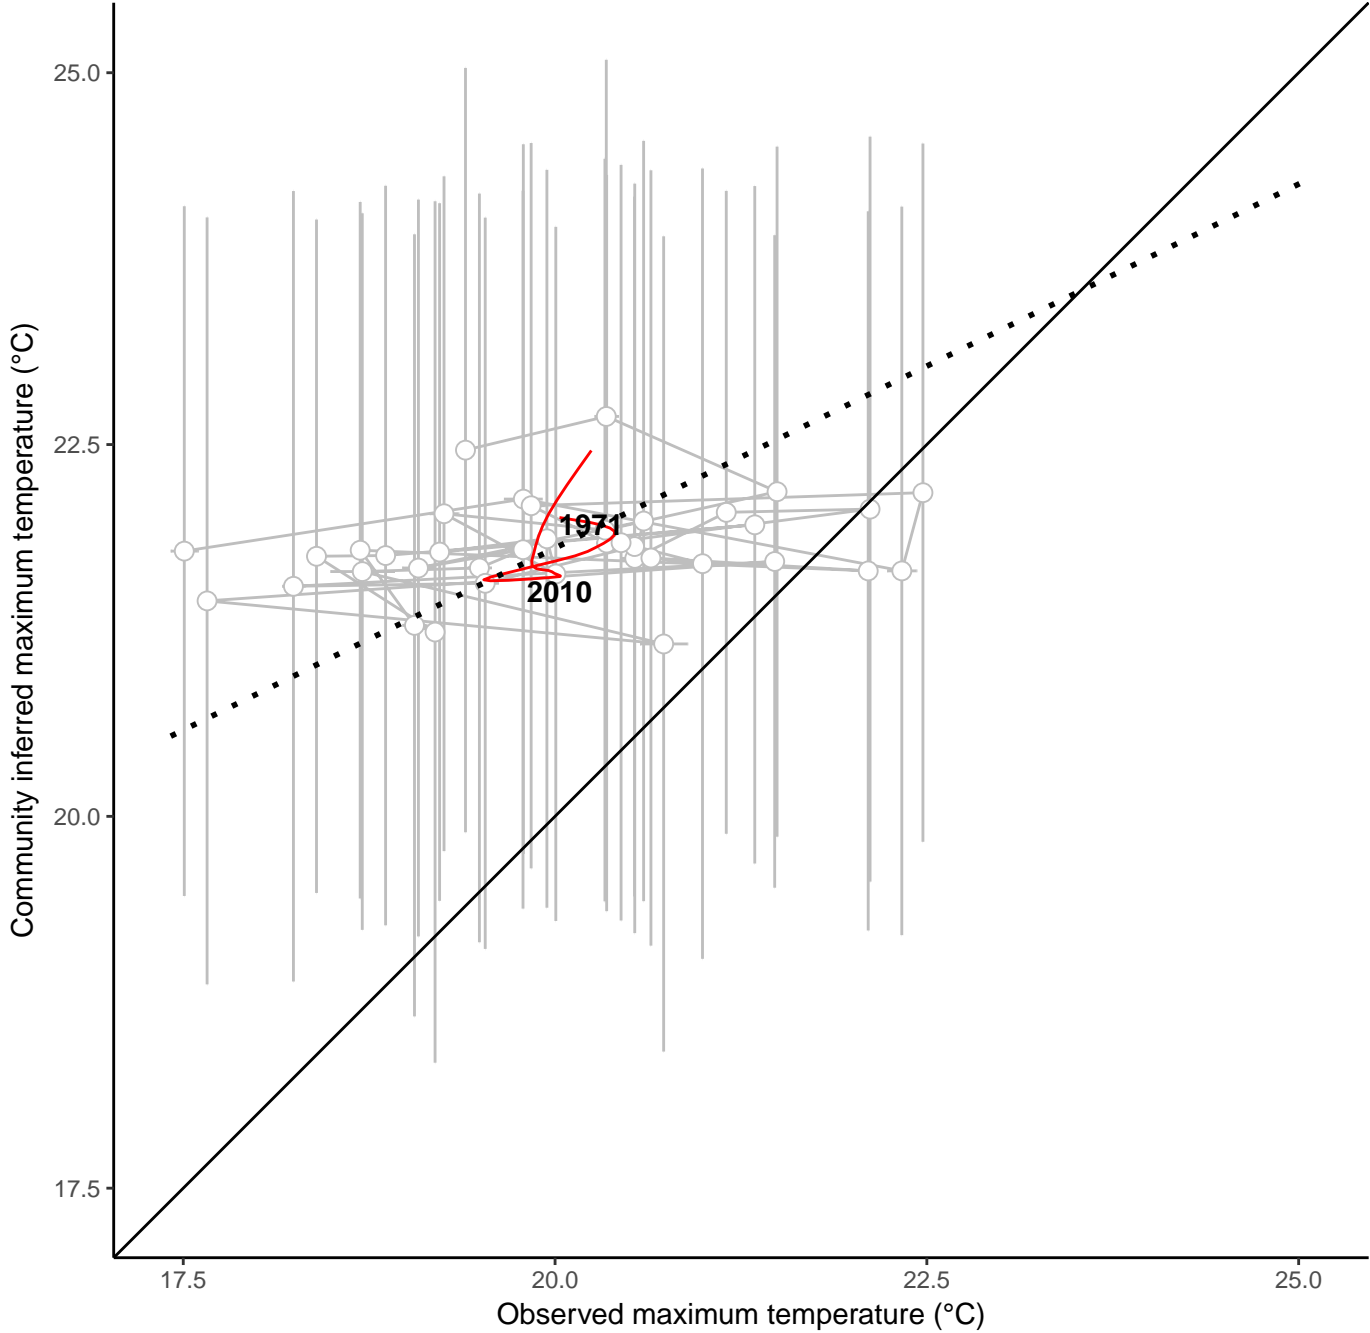

site : 840\_83\_34

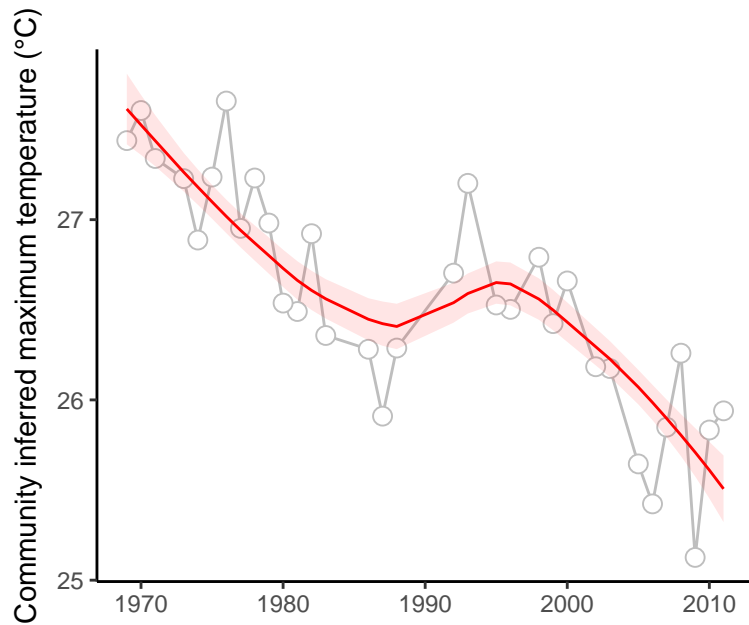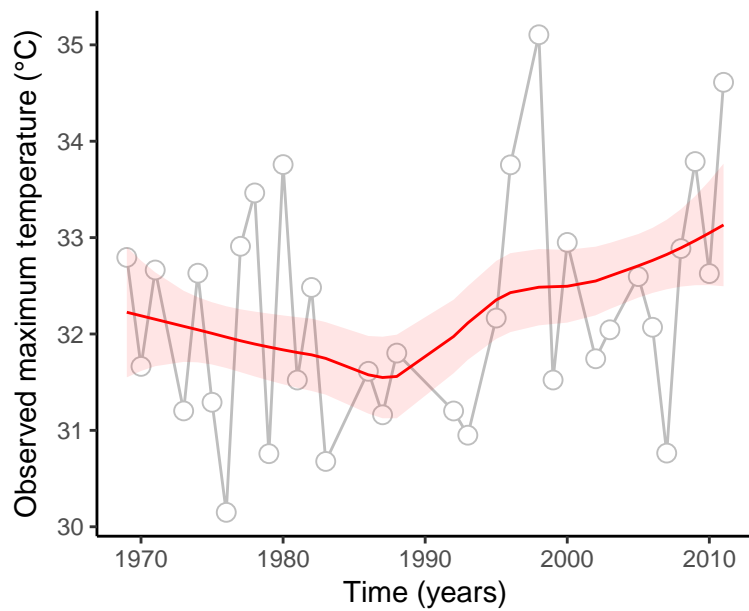

absolute deviation = 5.68 | deviation change = 3.01 | maximum state number = 1

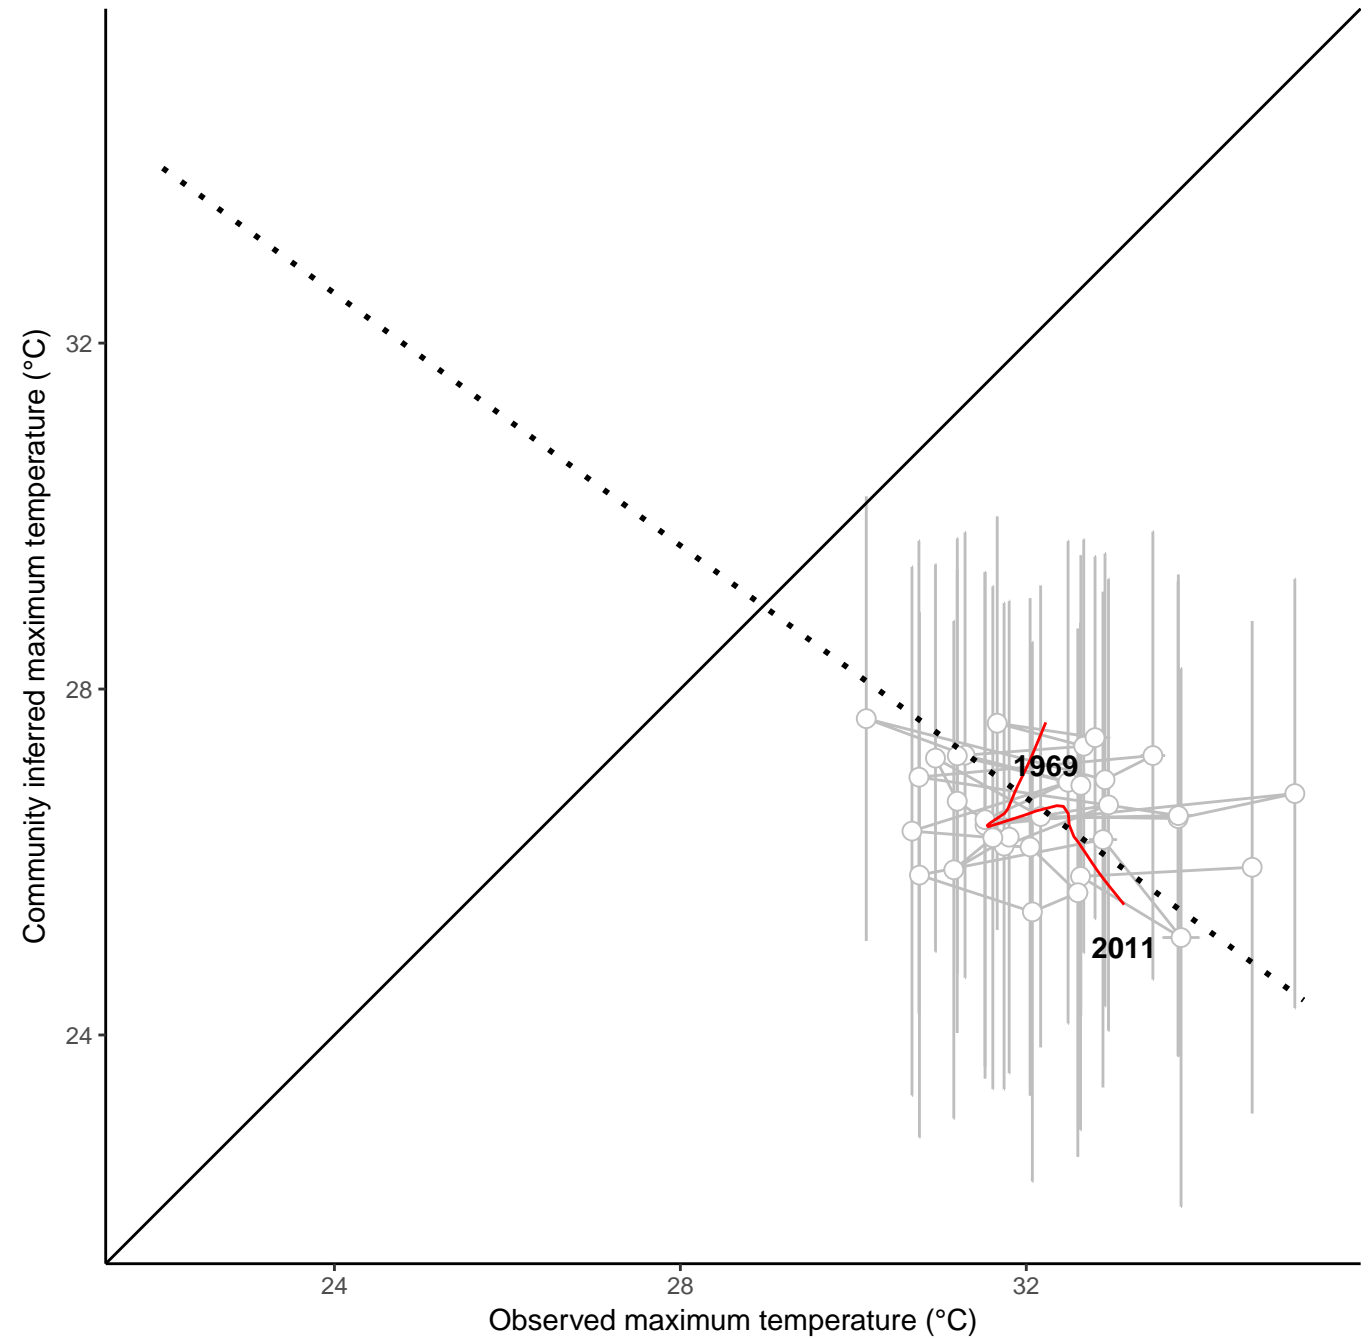

site : 840\_87\_4

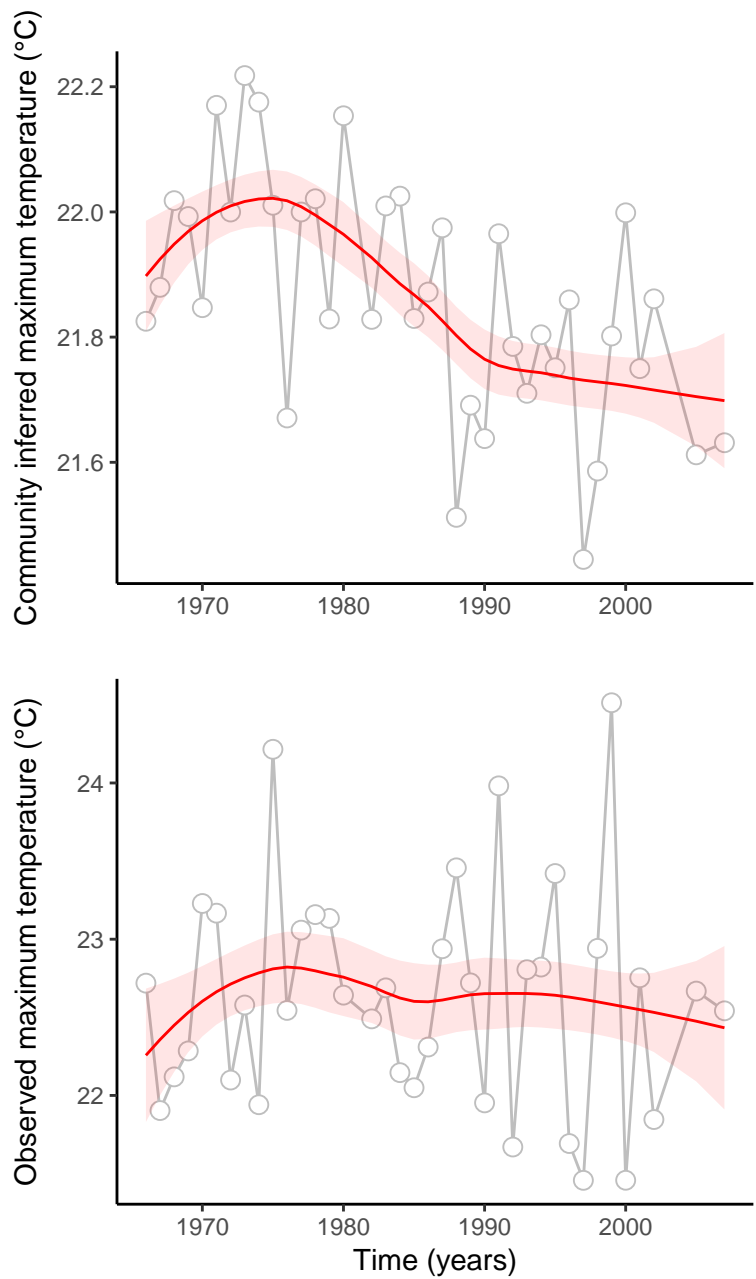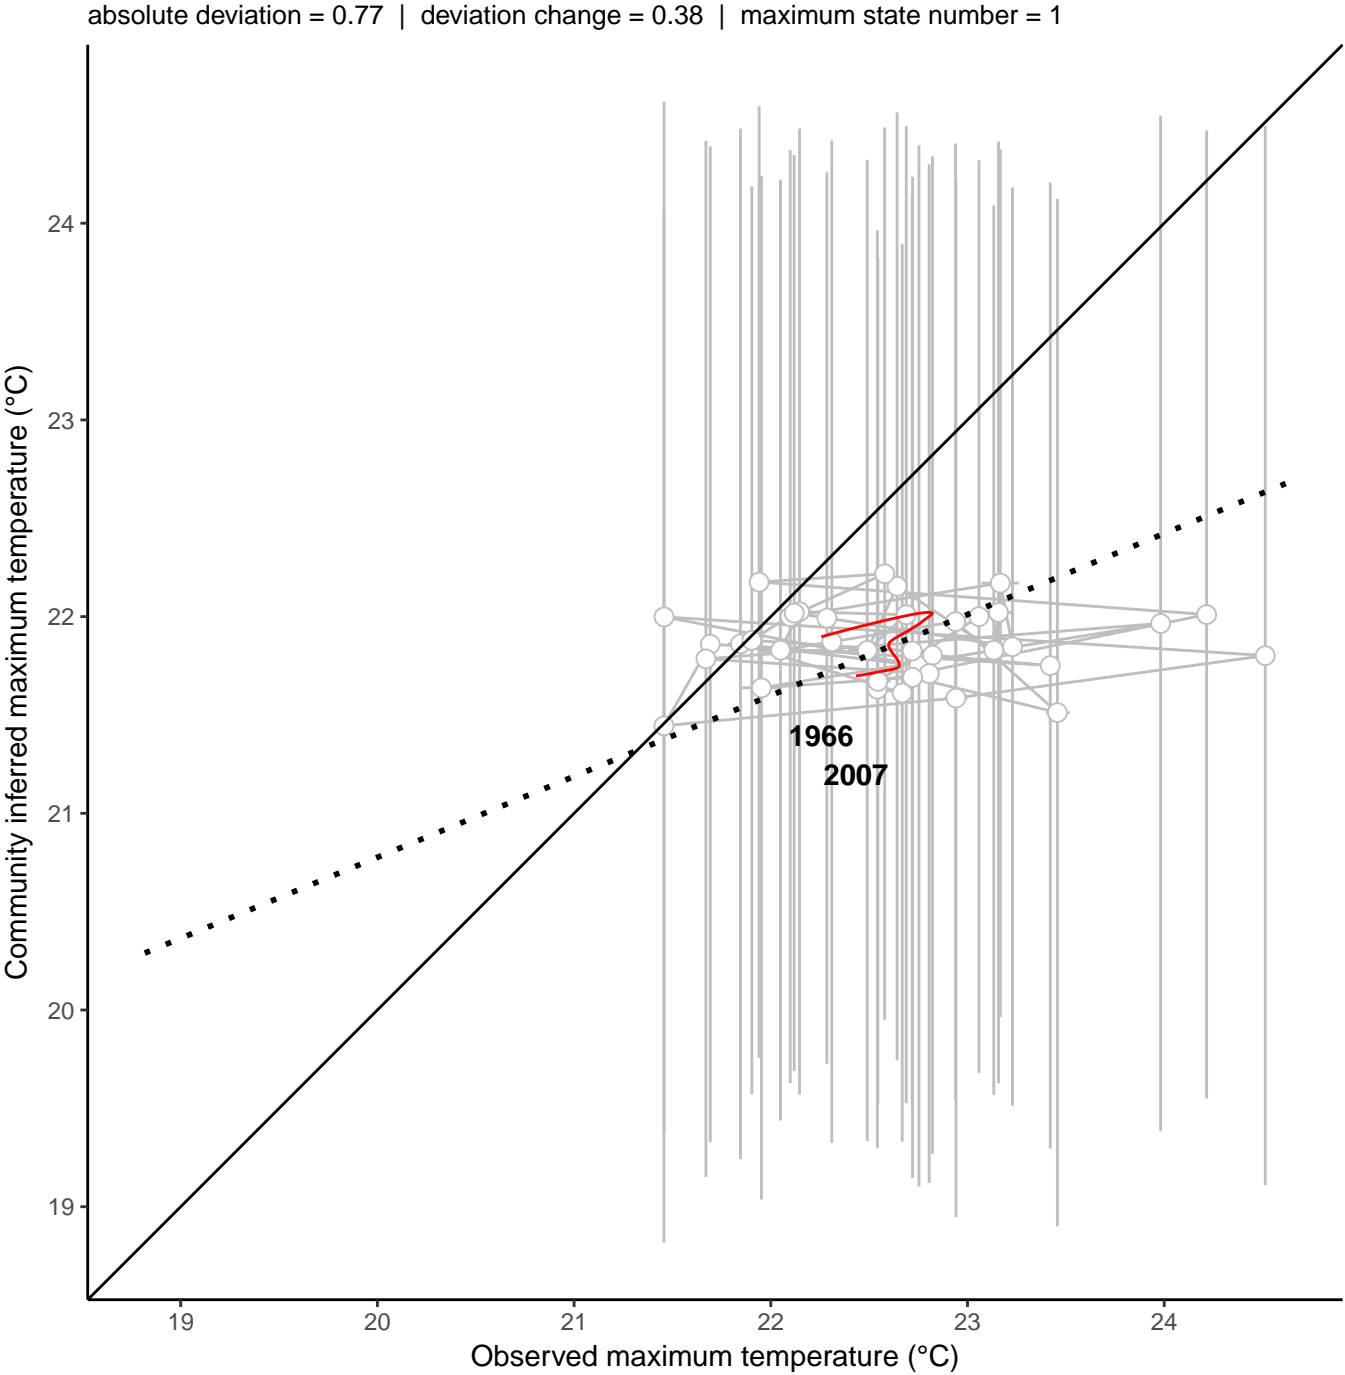

site : 840\_88\_36

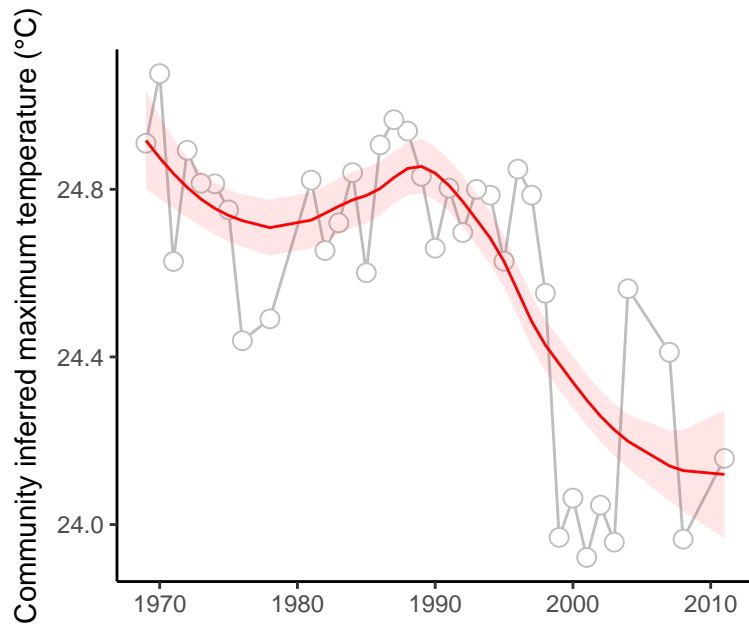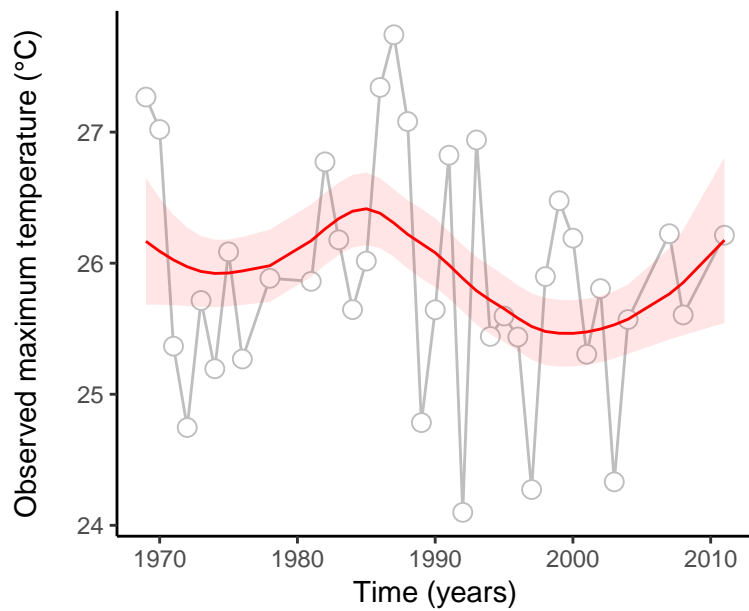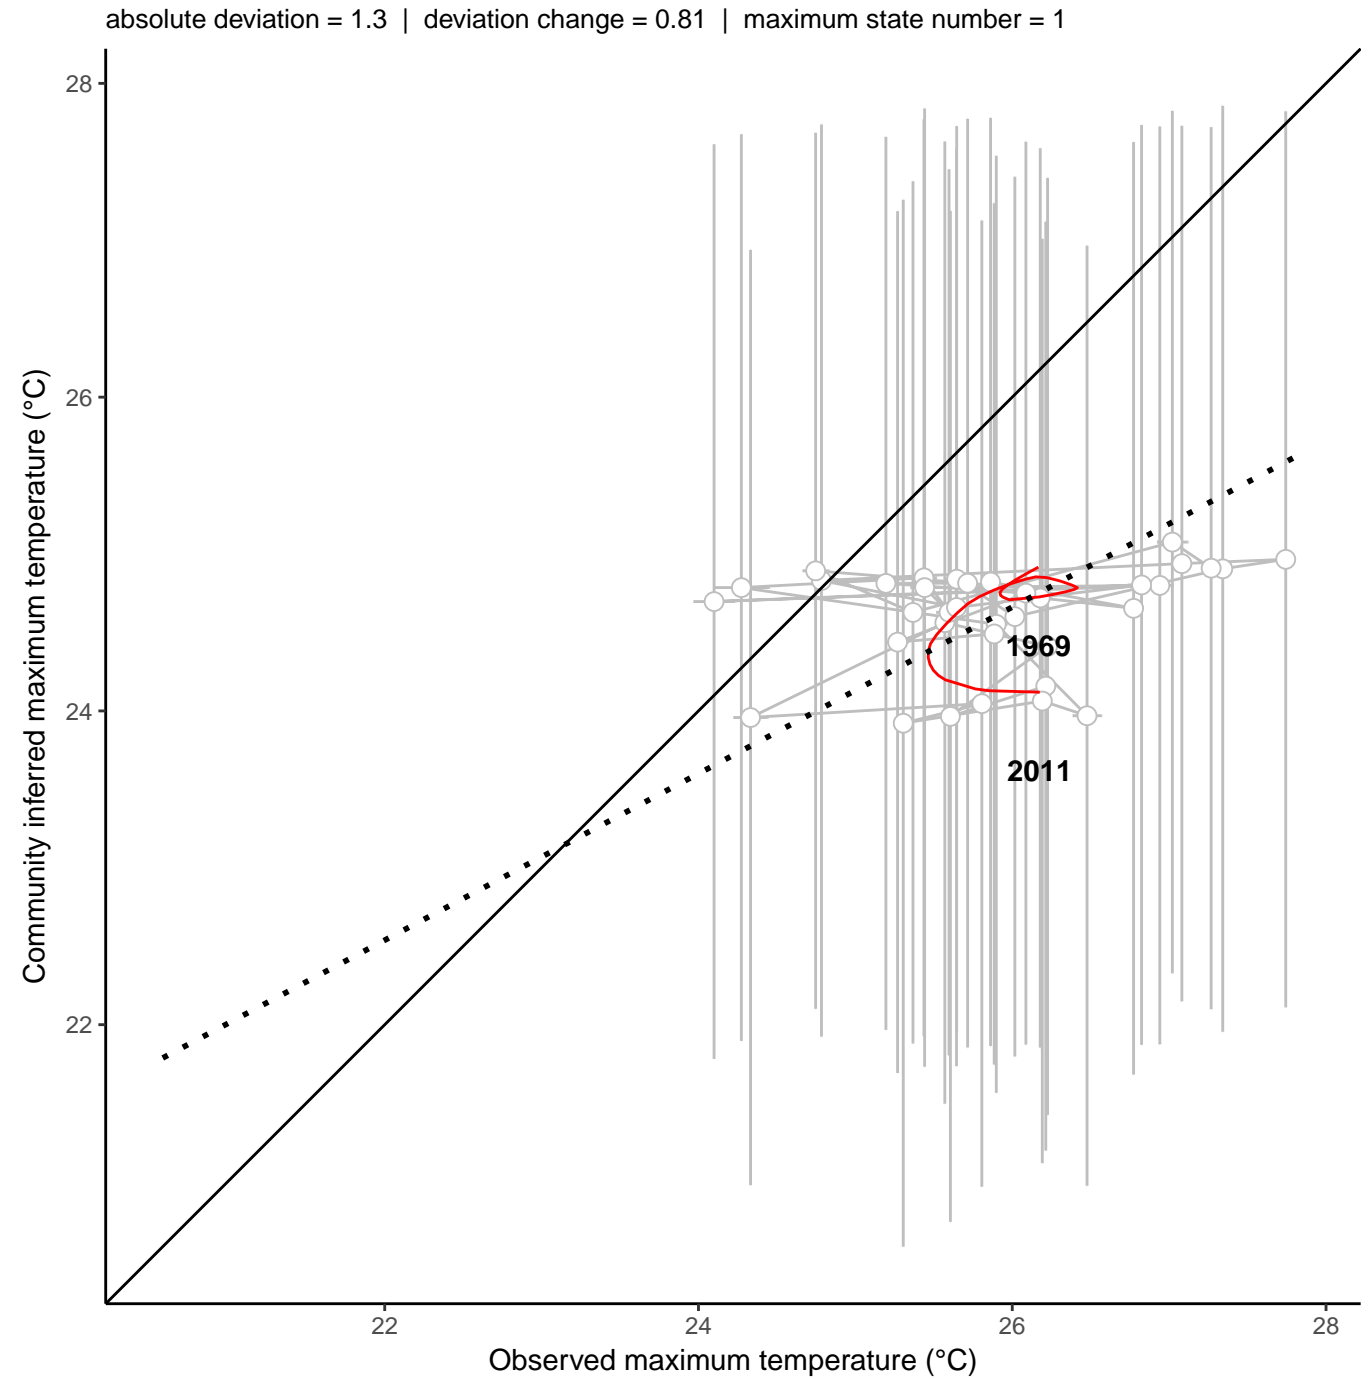



site : 840\_14\_188

absolute deviation = 3.05 | deviation change = -1.41 | maximum state number = 1

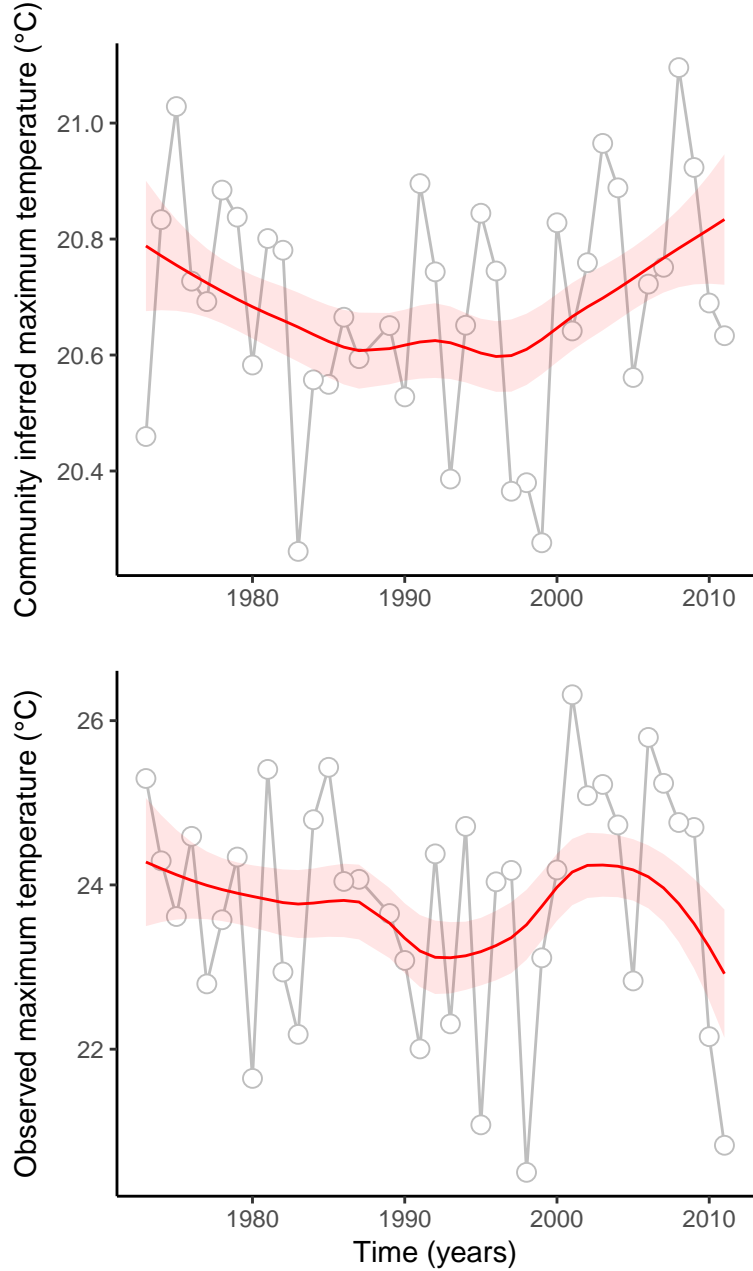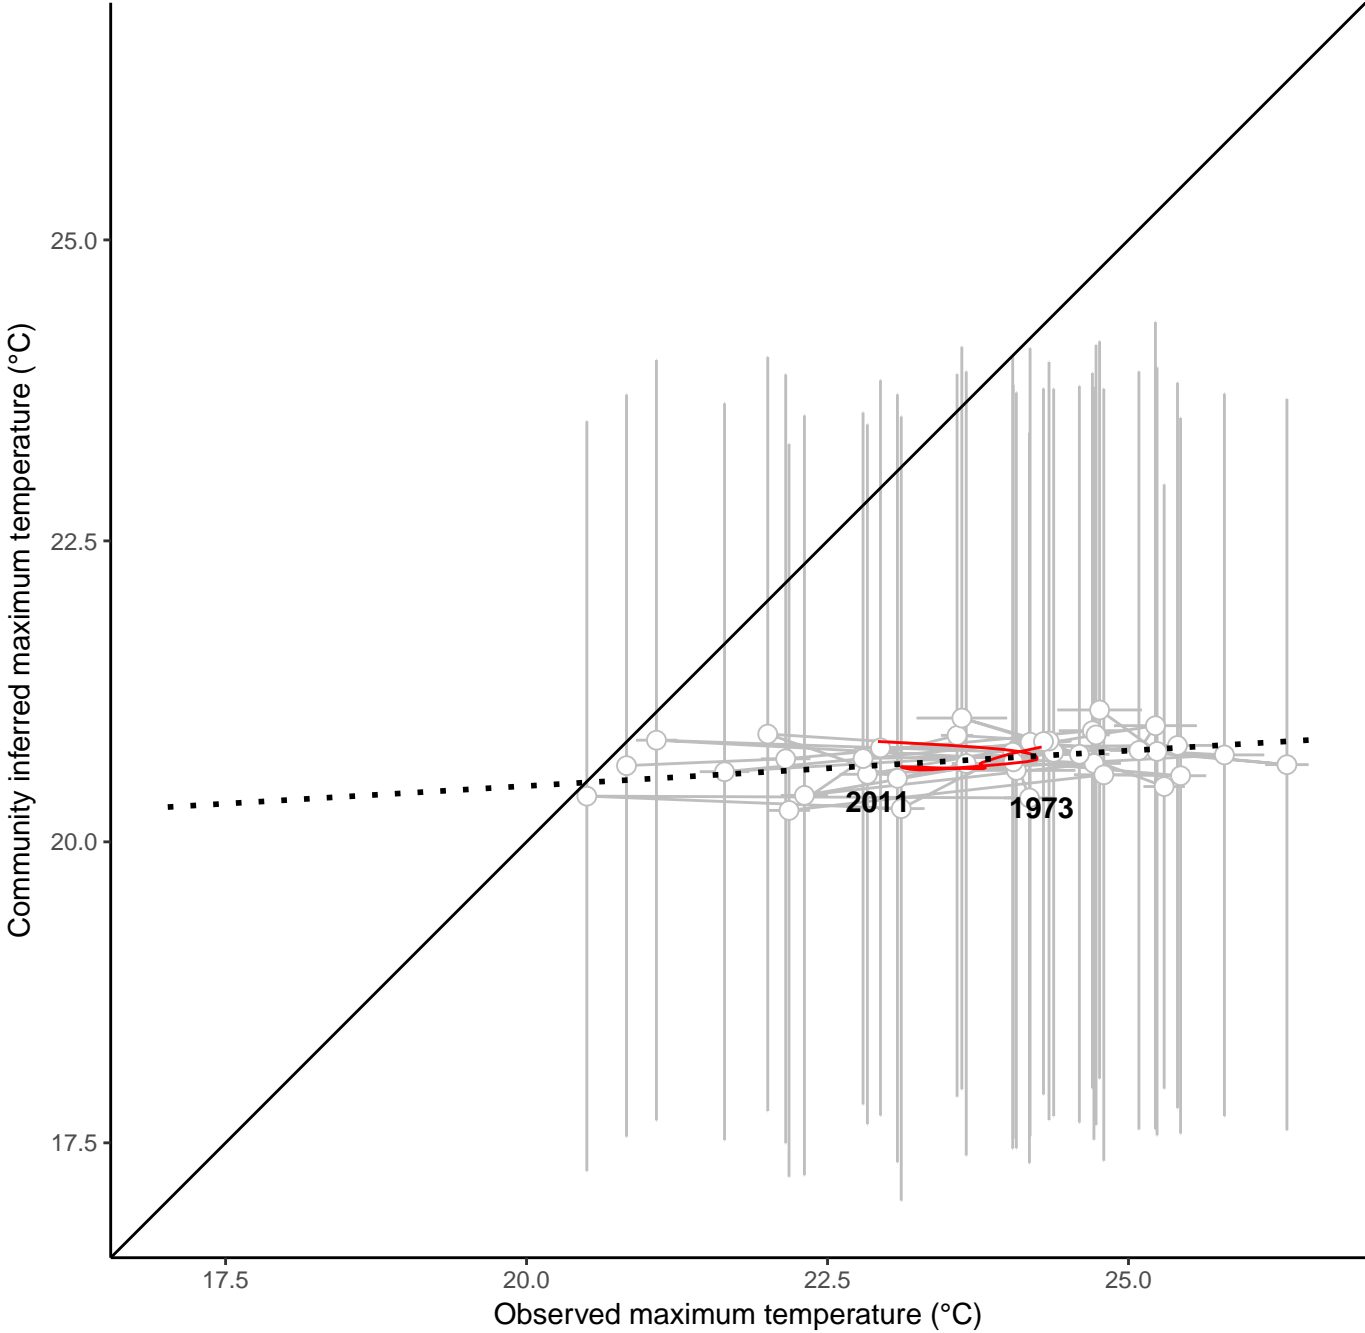

site : 840\_14\_199

absolute deviation = 2.93 | deviation change = -1.07 | maximum state number = 1

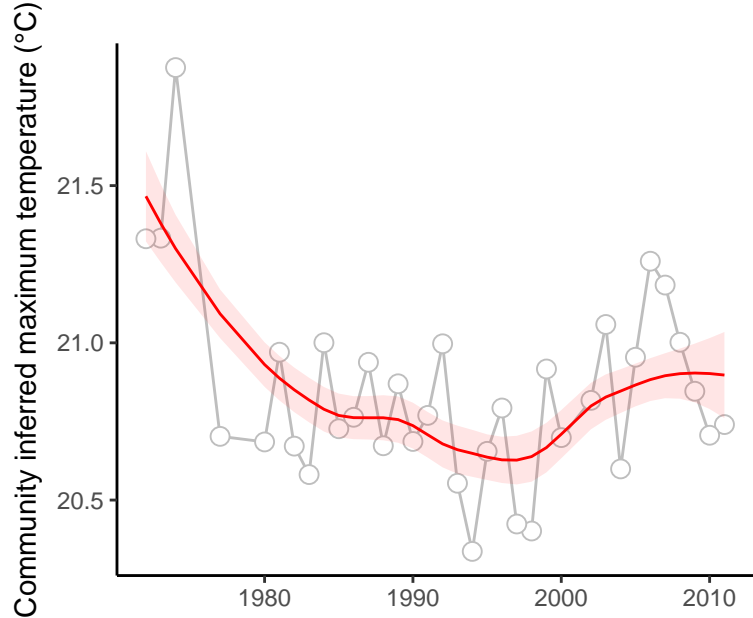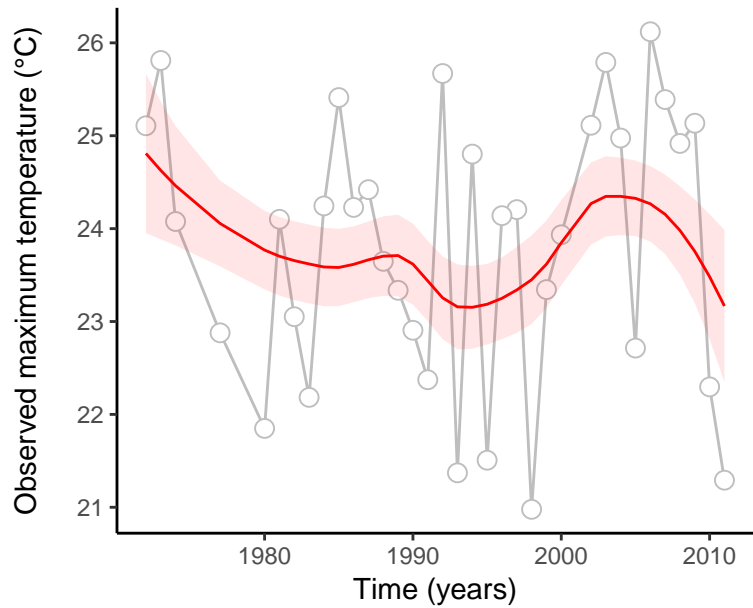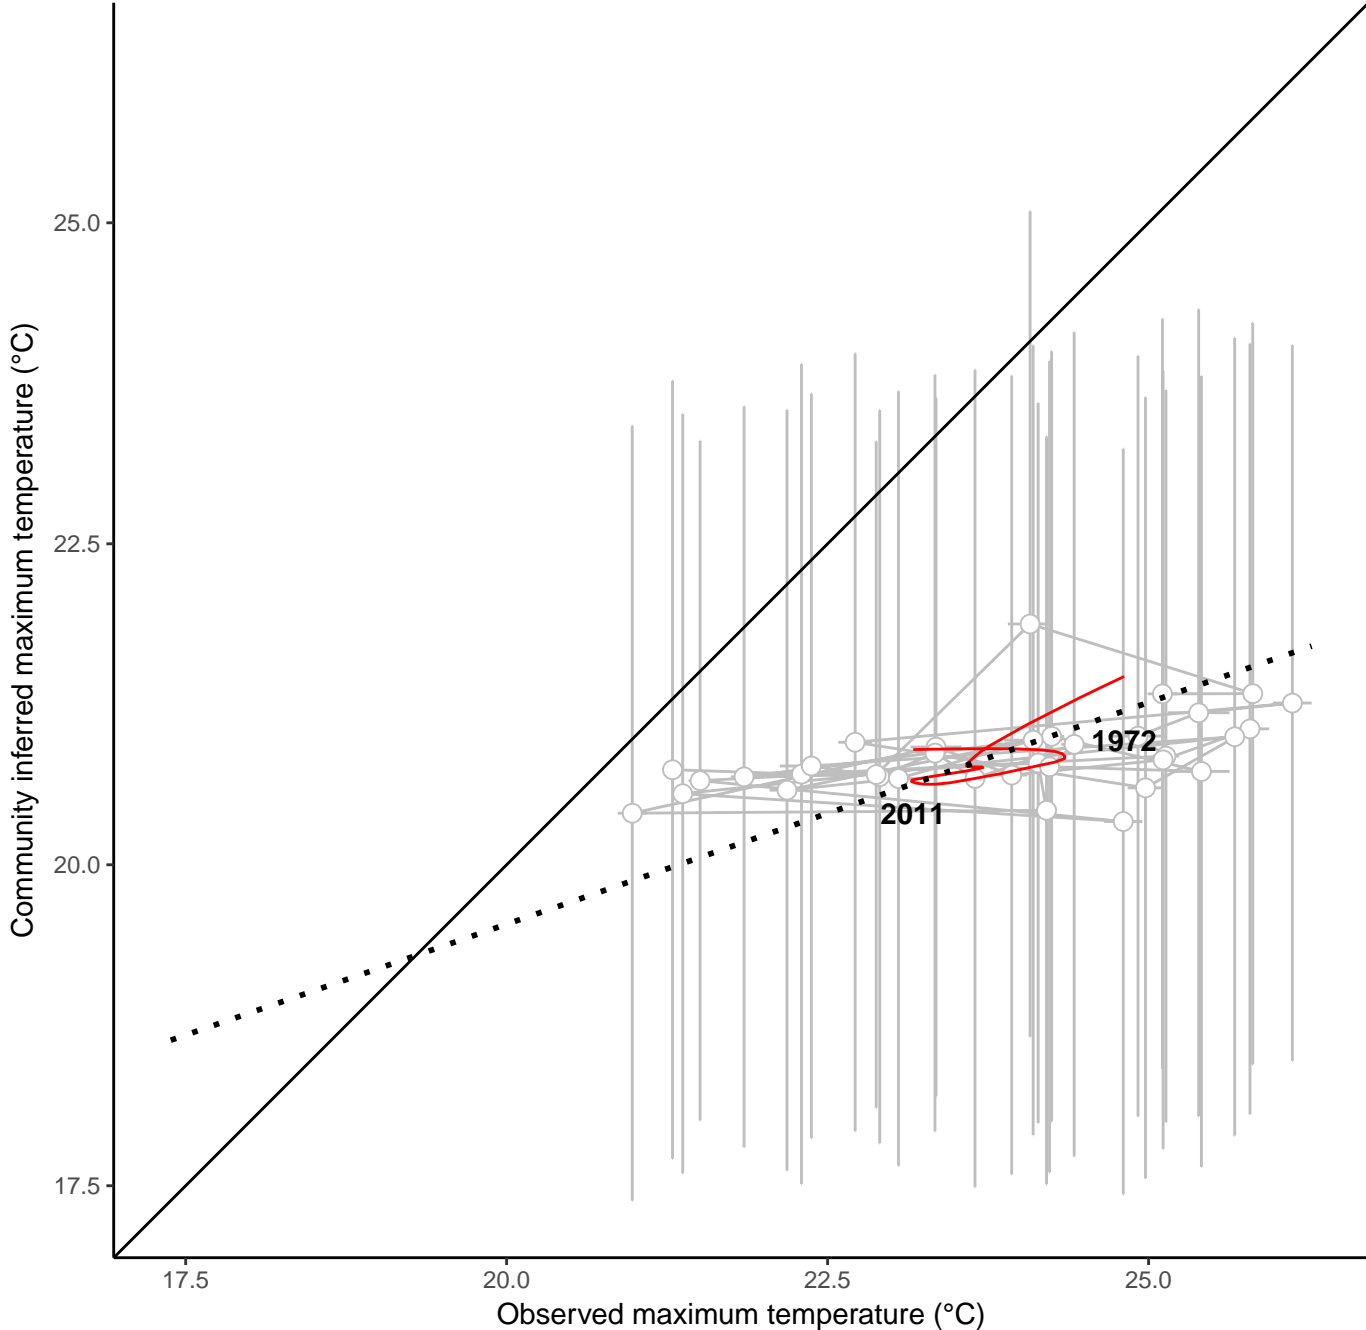

site : 840\_14\_54

absolute deviation = 6.08 | deviation change = -0.37 | maximum state number = 2

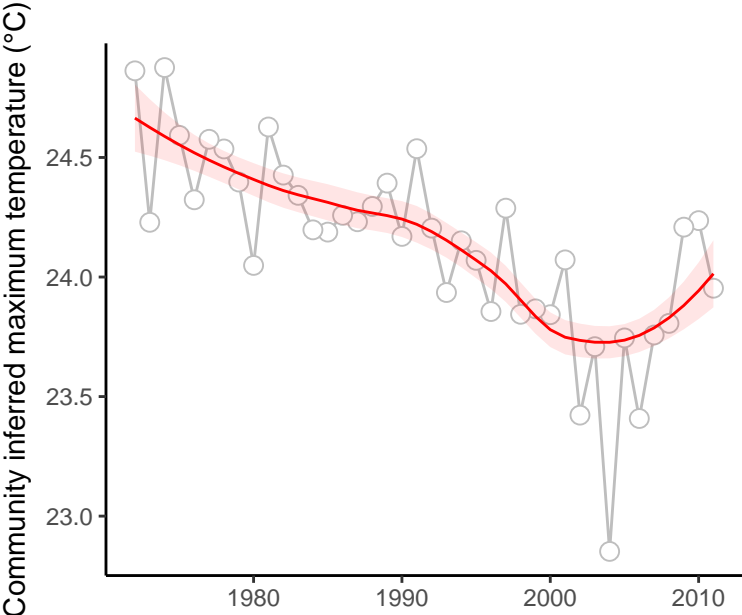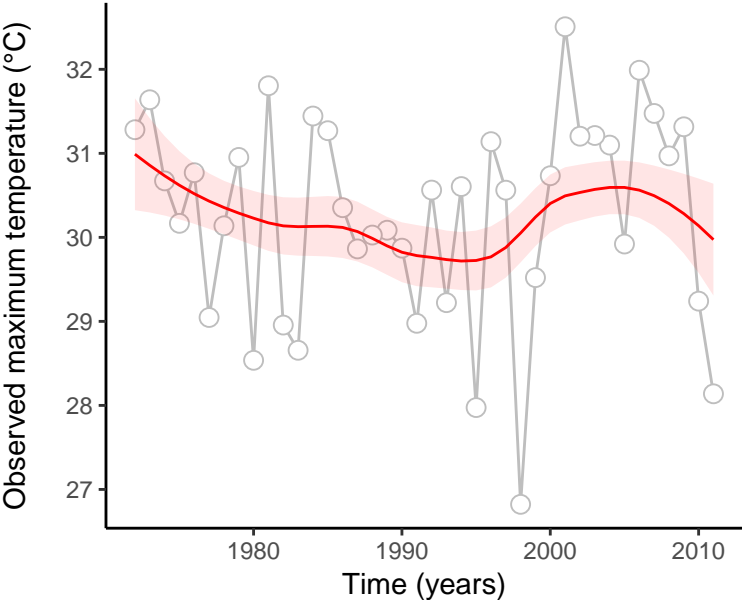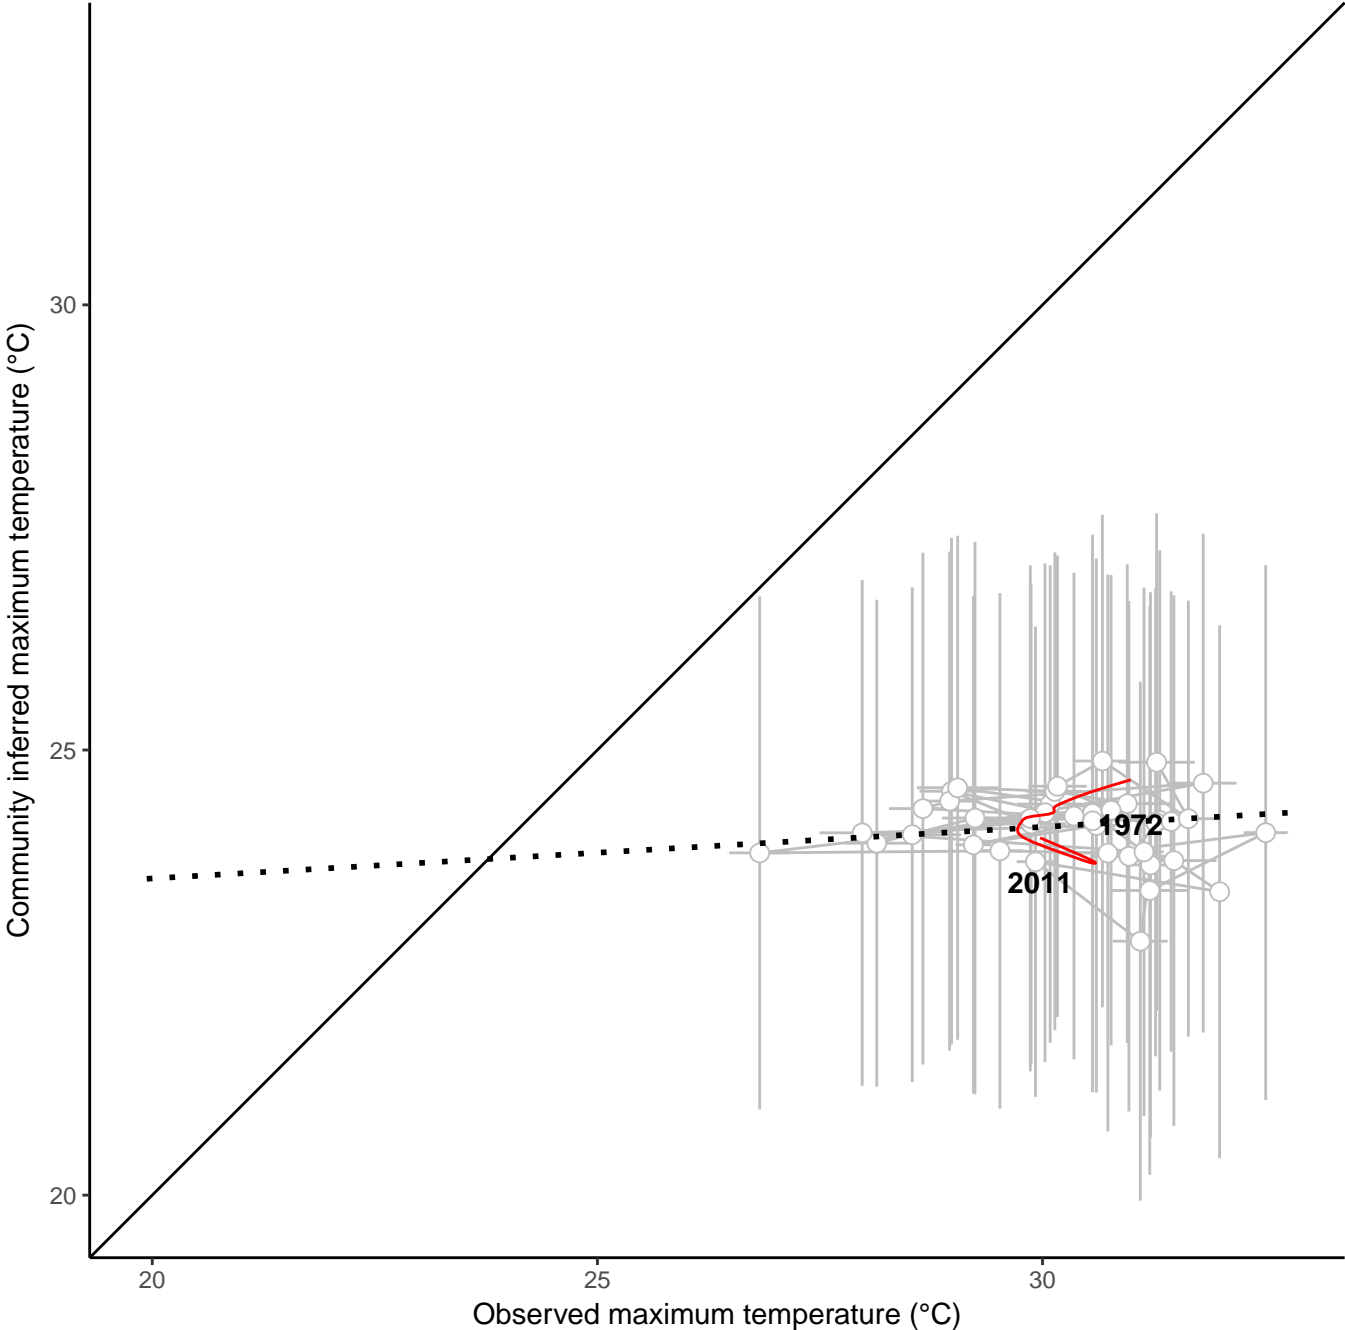

site : 840\_14\_9

absolute deviation = 1.74 | deviation change = -2.07 | maximum state number = 1

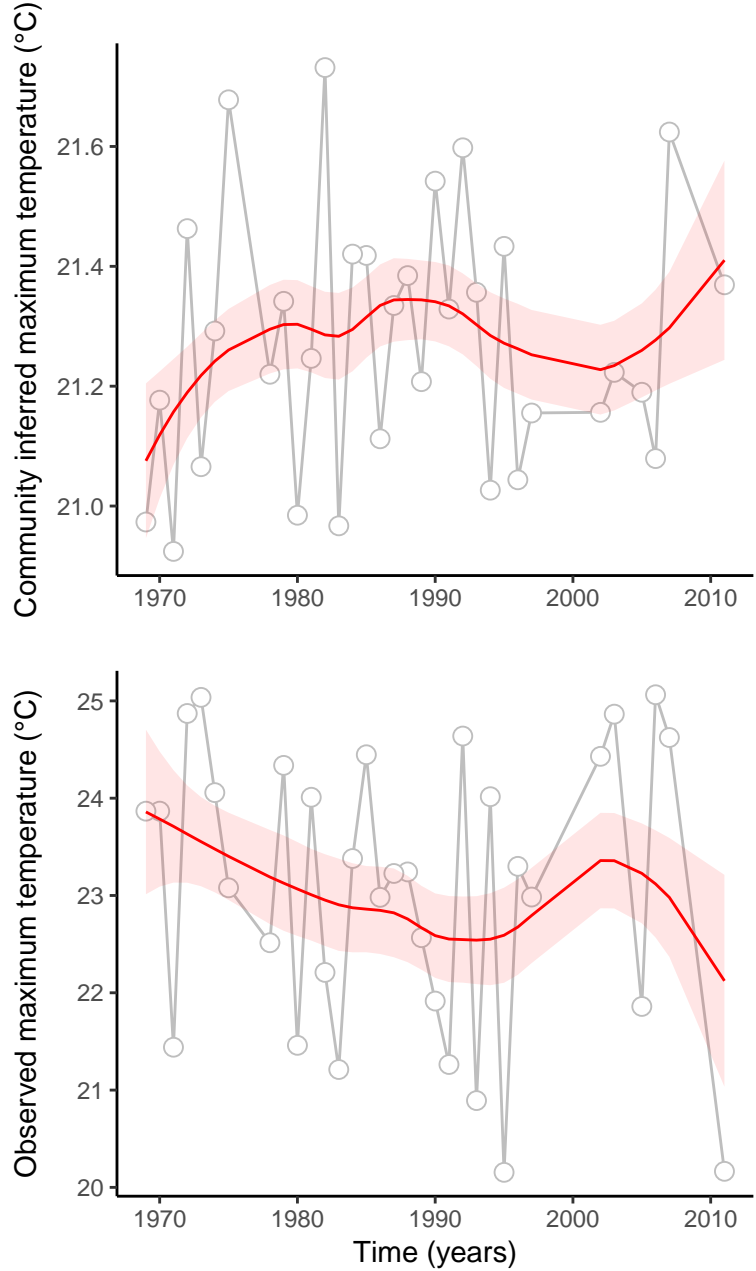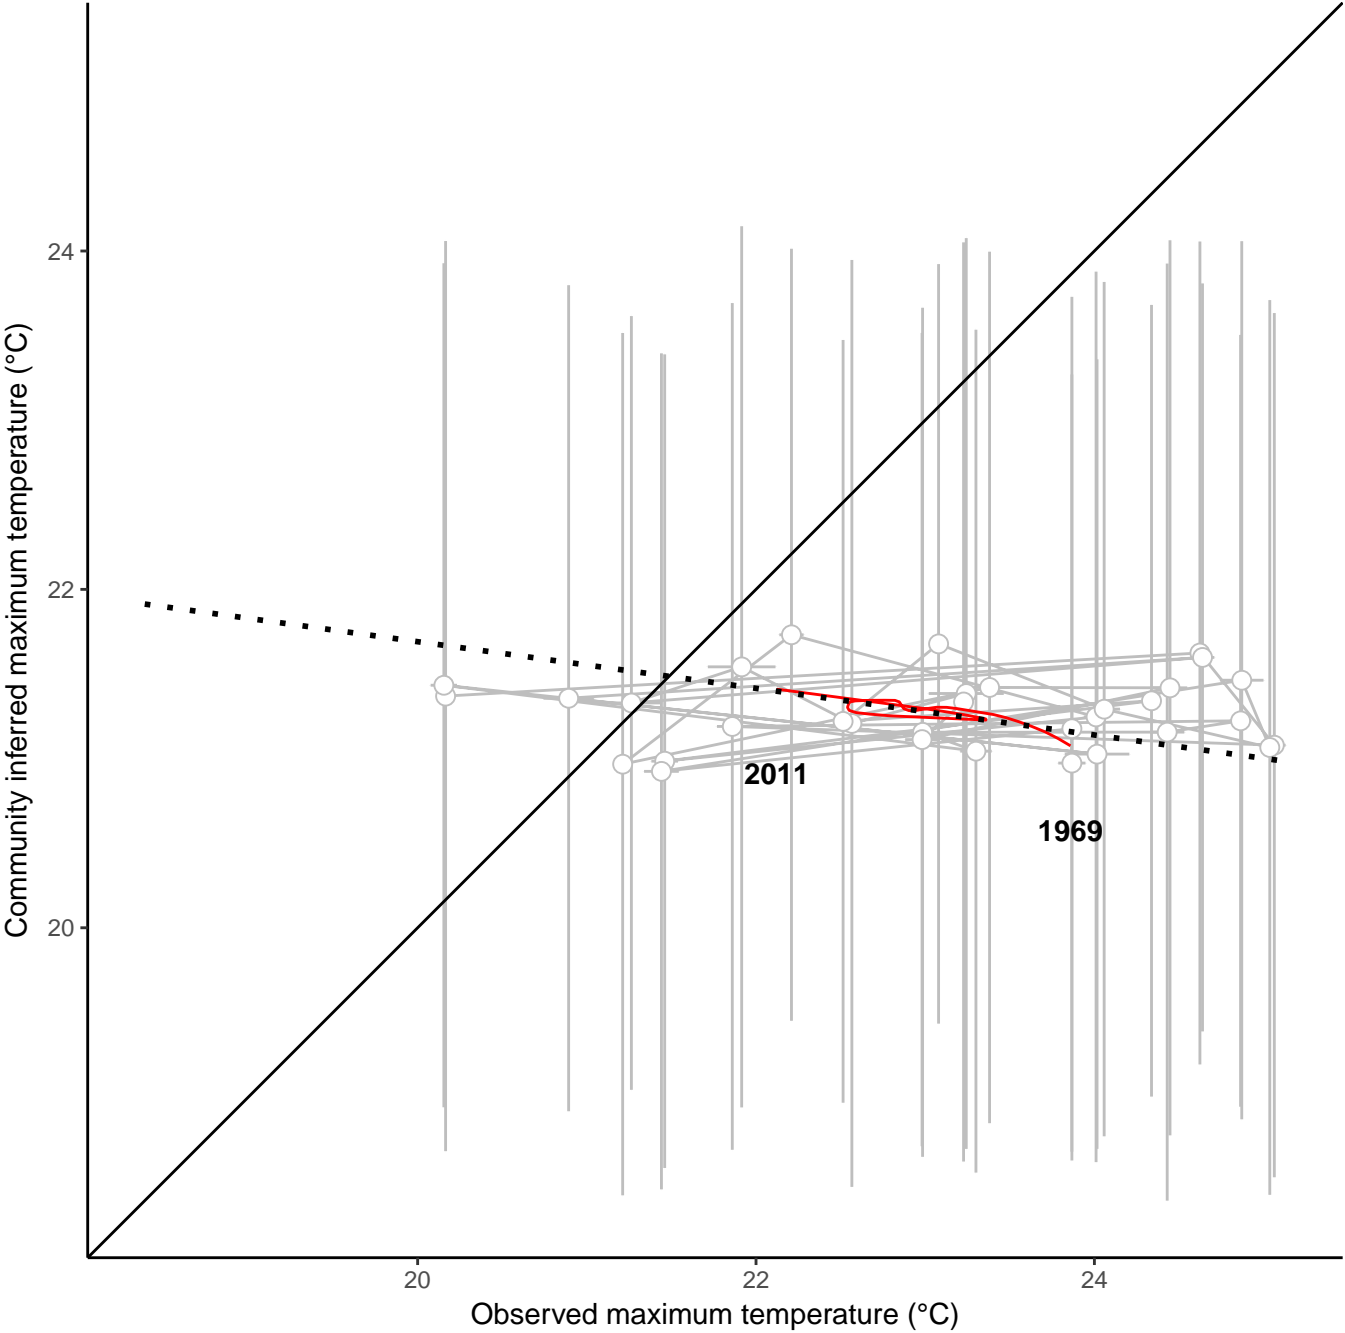

site : 840\_2\_43

absolute deviation = 4.45 | deviation change = 1.51 | maximum state number = 1

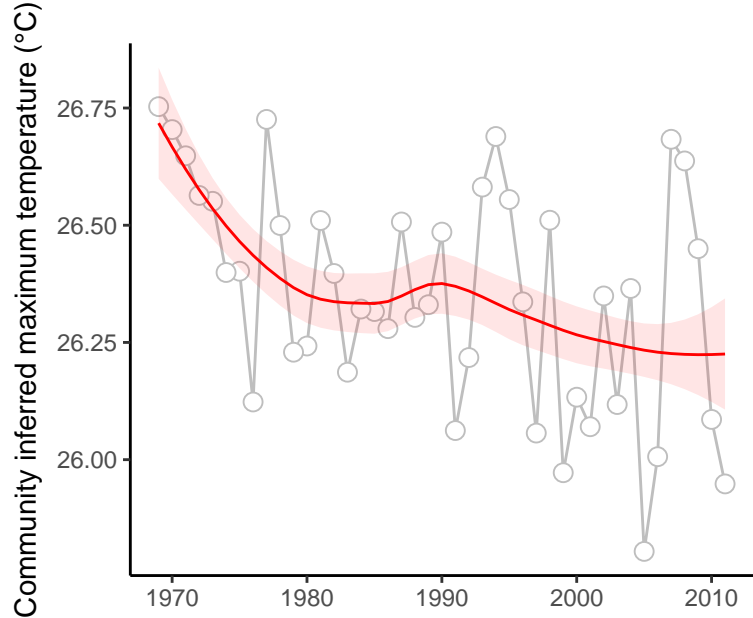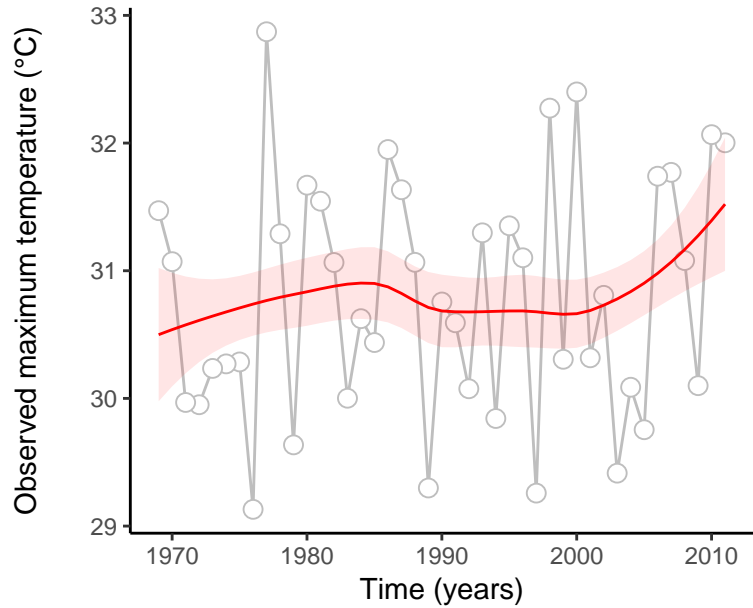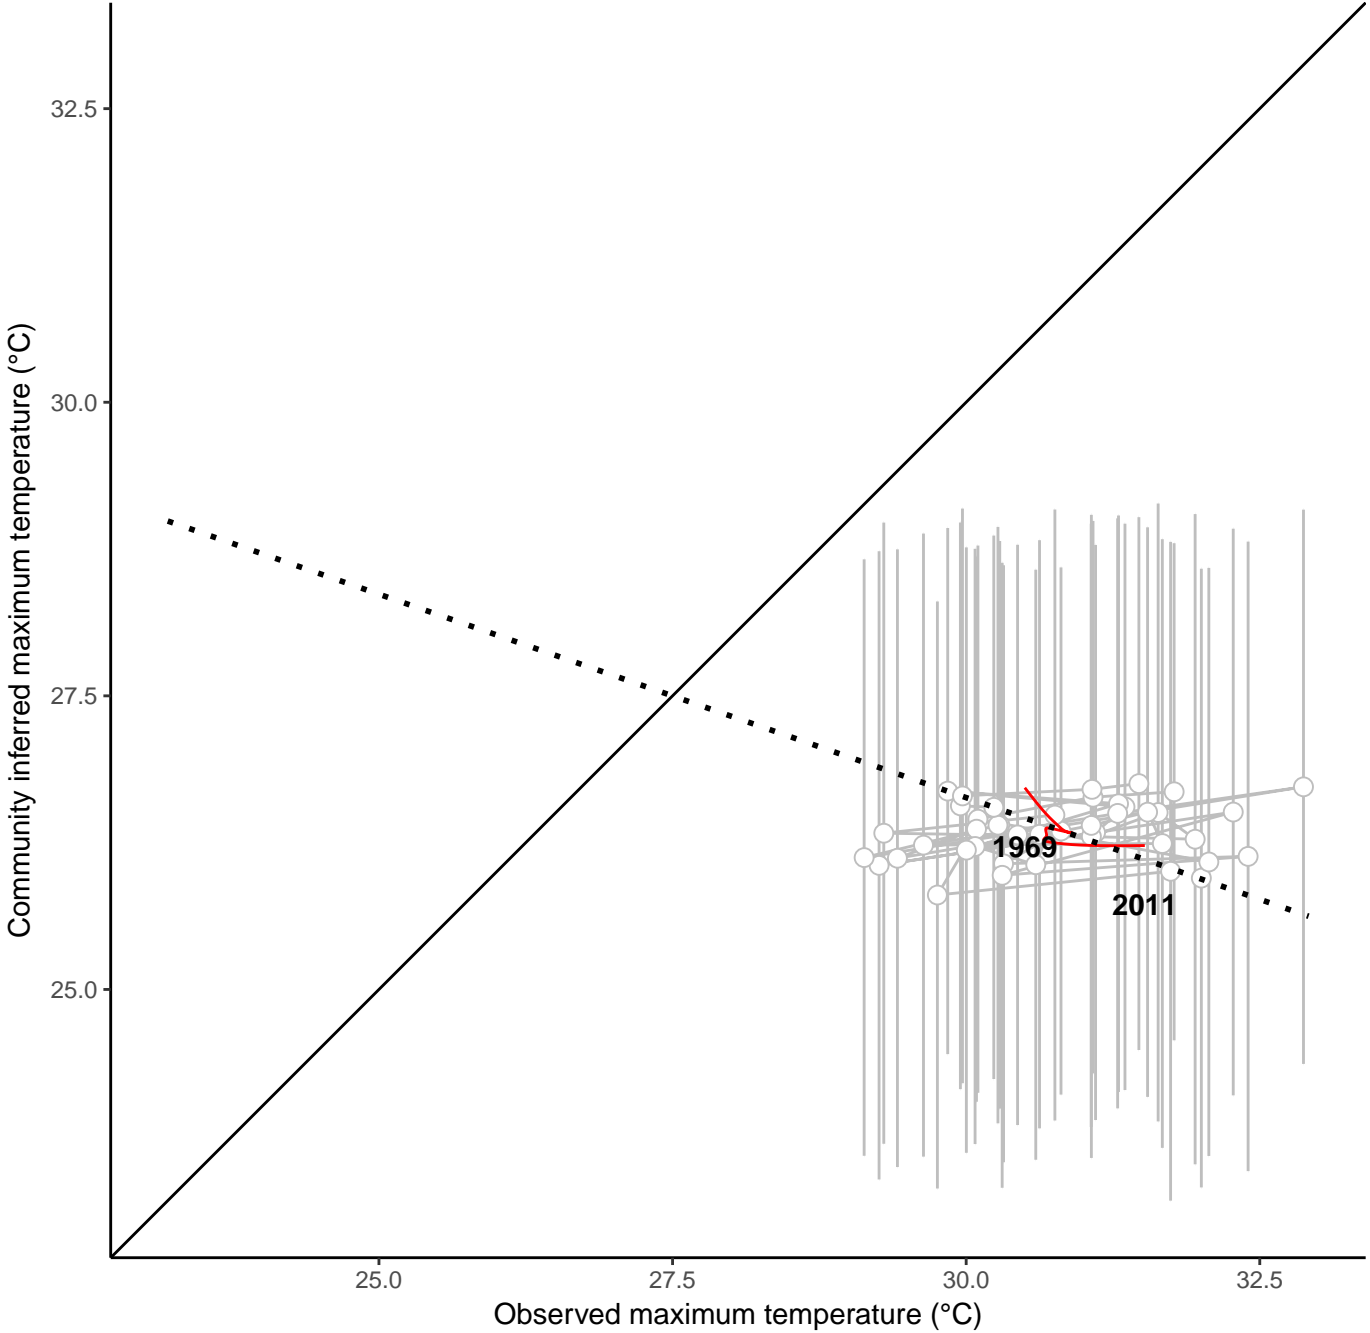

site : 840\_25\_14

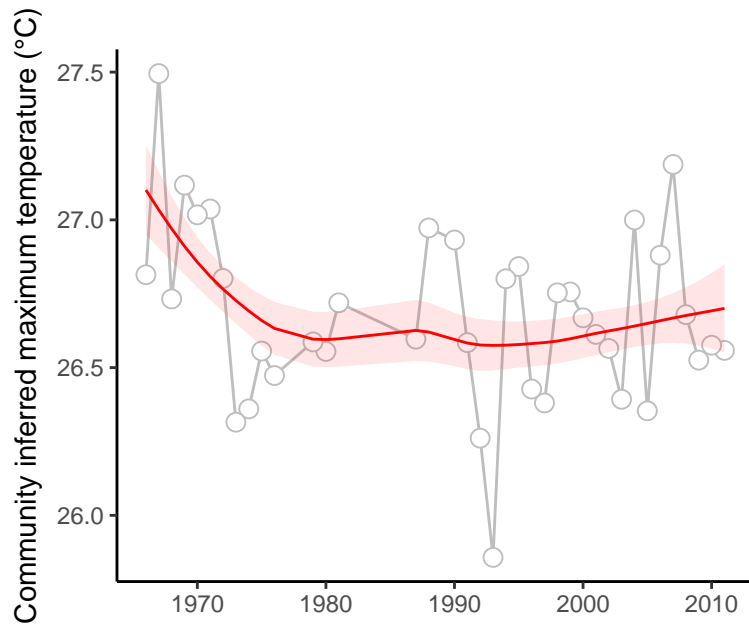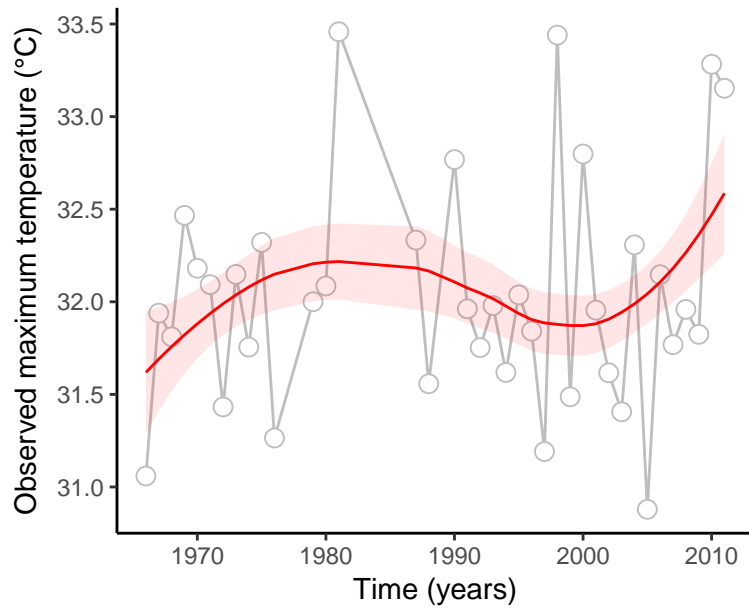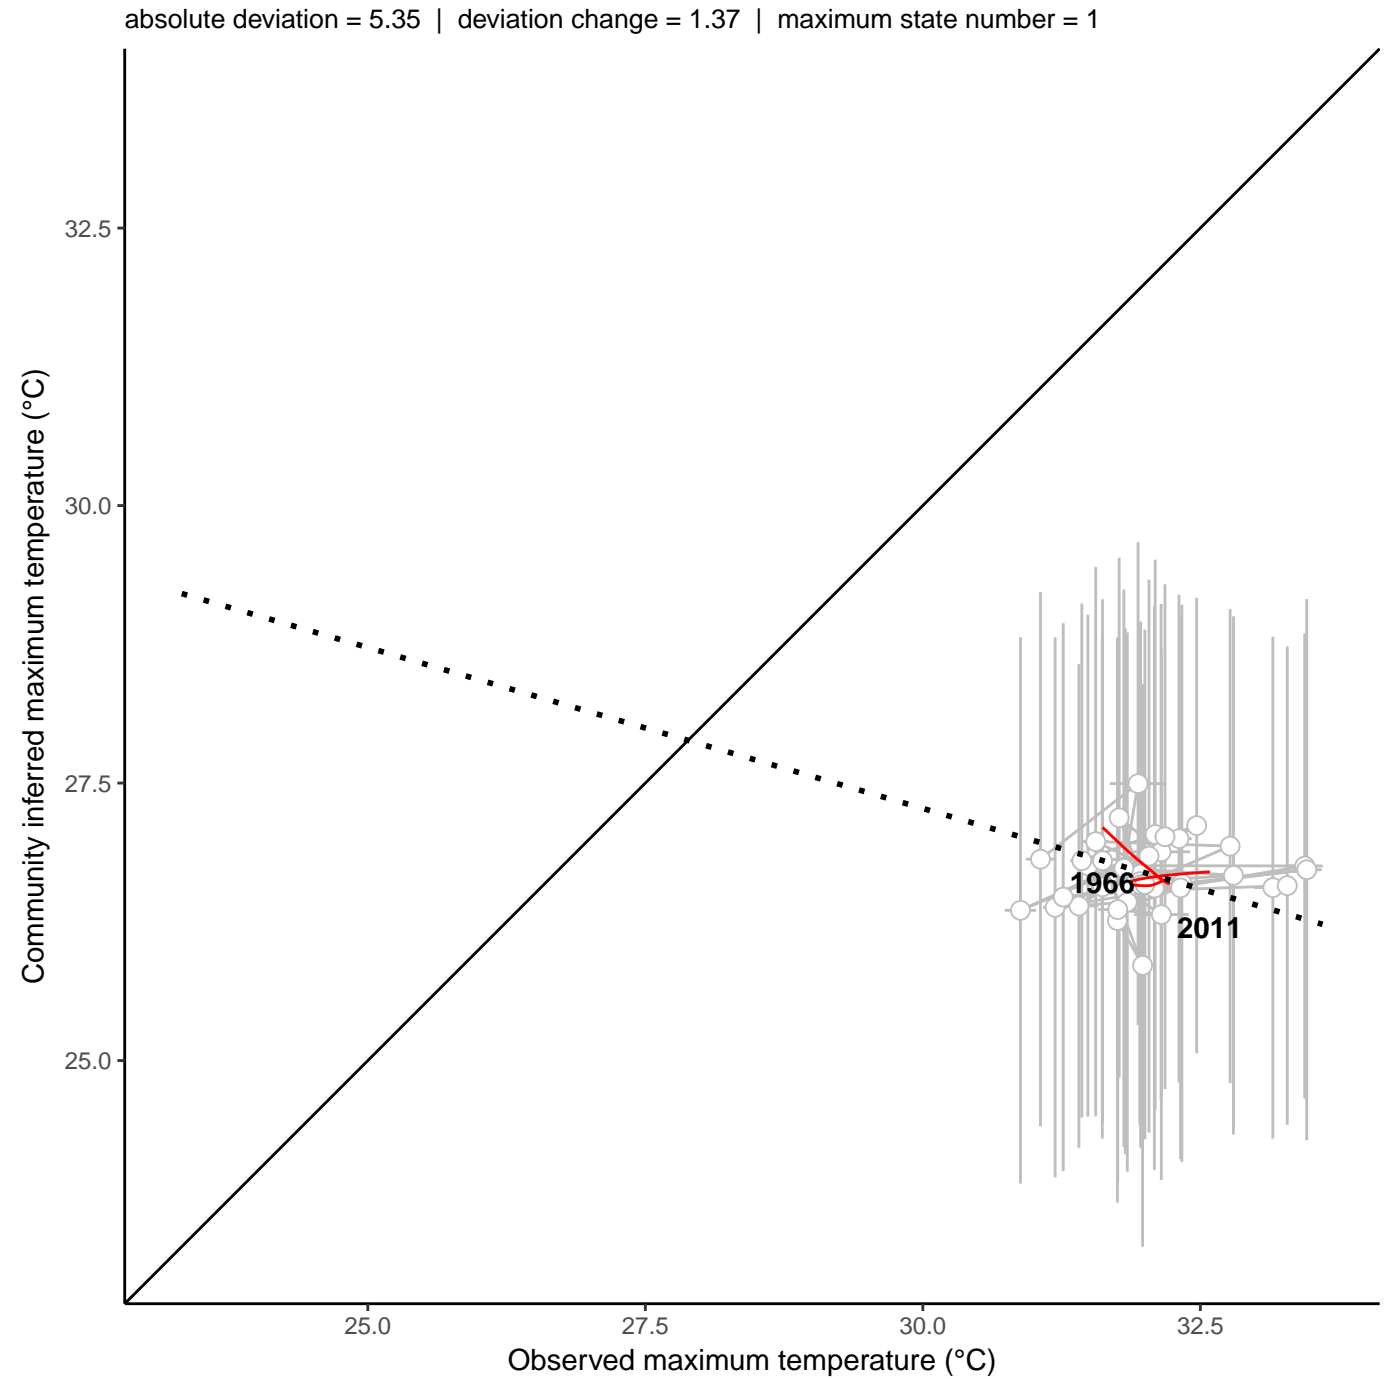

site : 840\_27\_10

absolute deviation = 5.27 | deviation change = 0.57 | maximum state number = 1

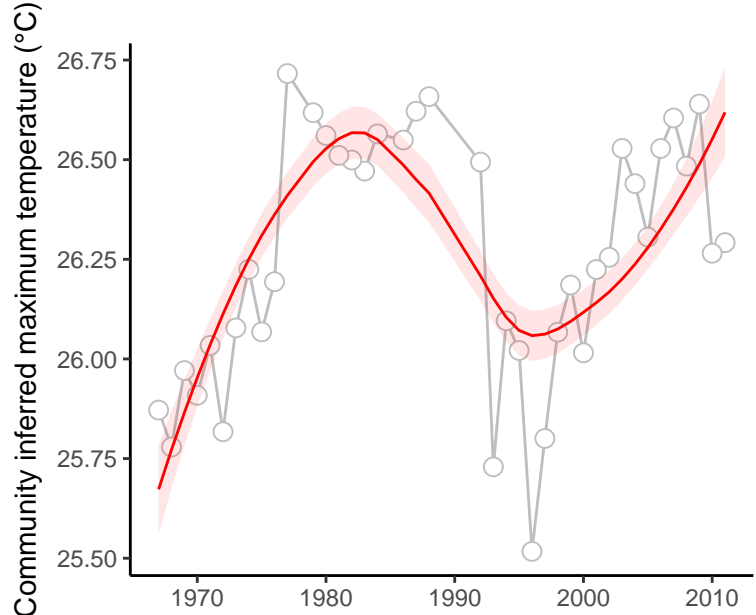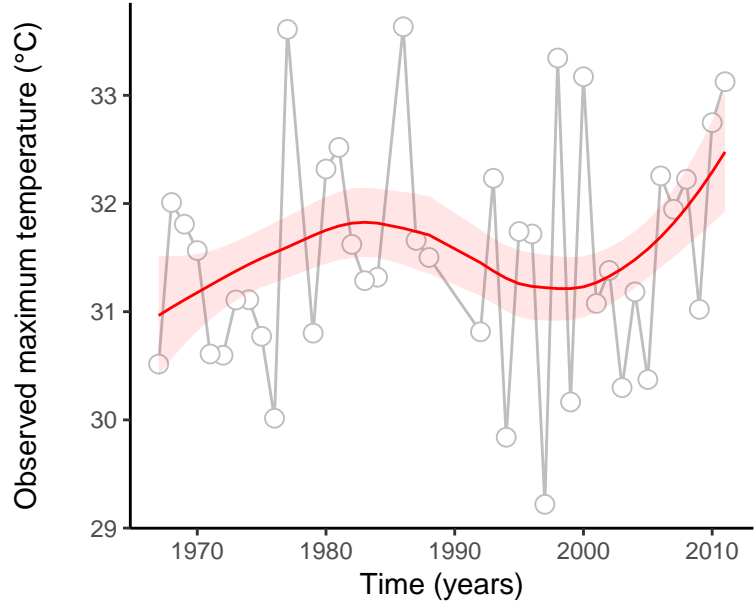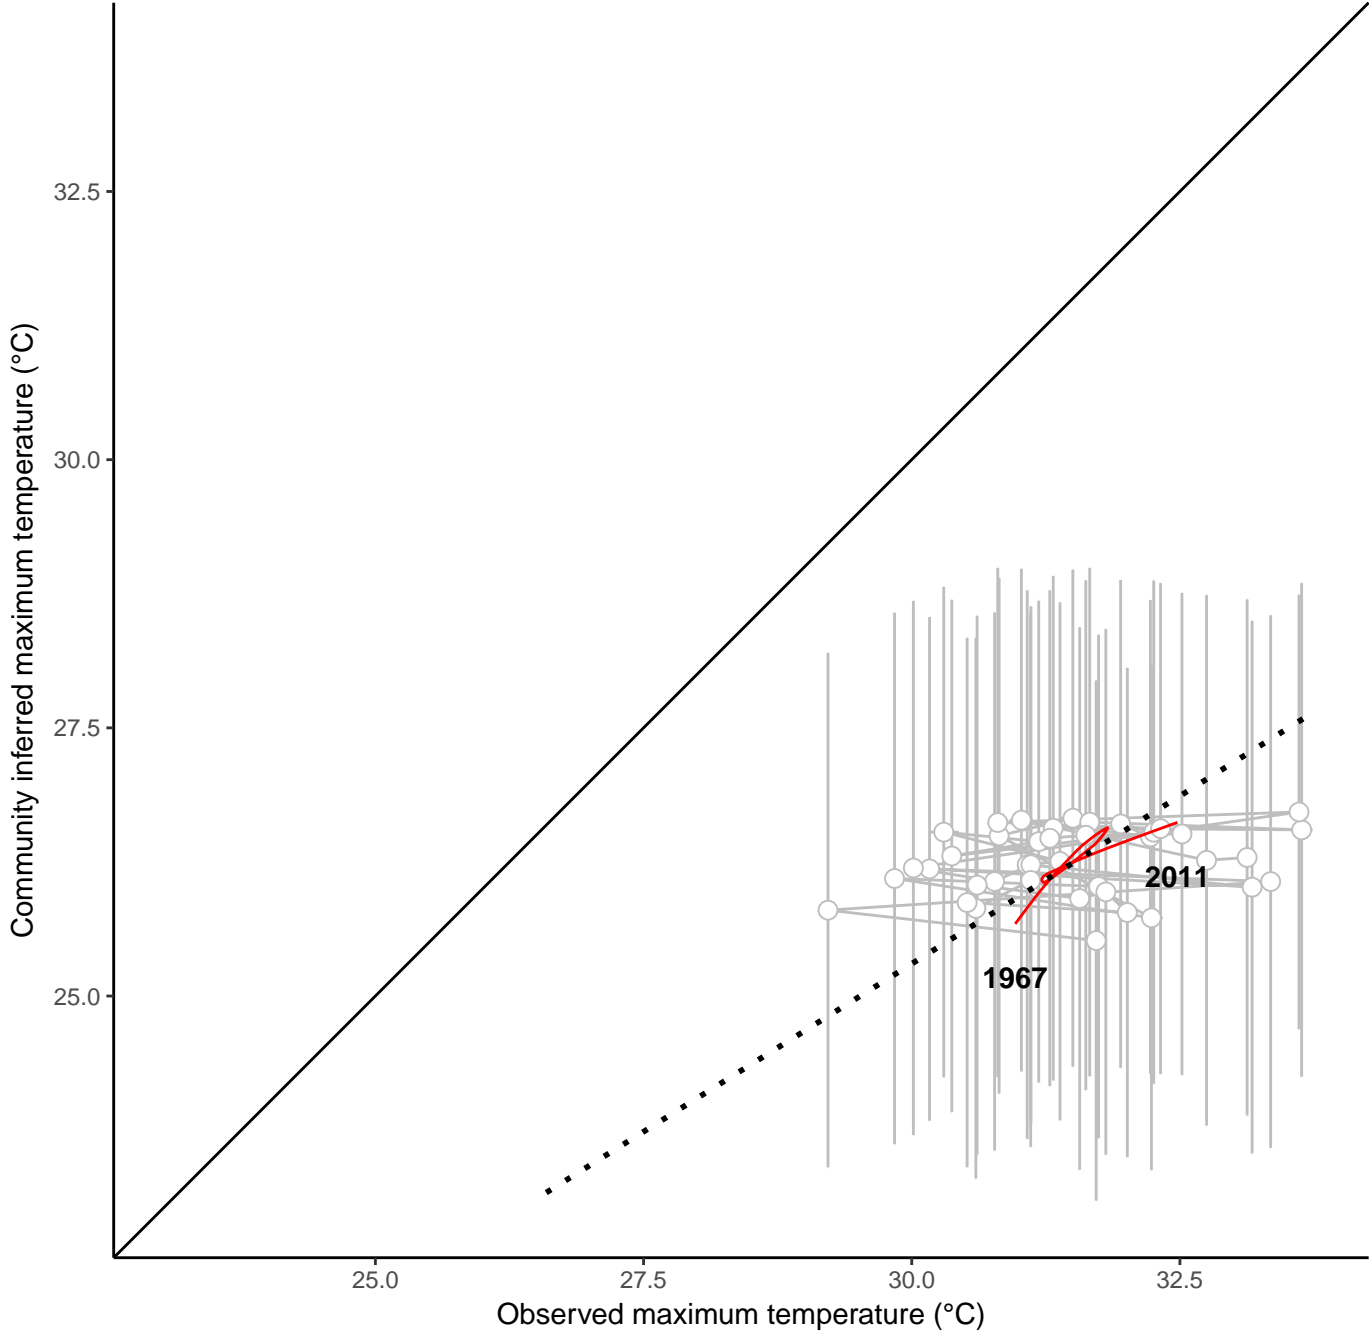

site : 840\_35\_39

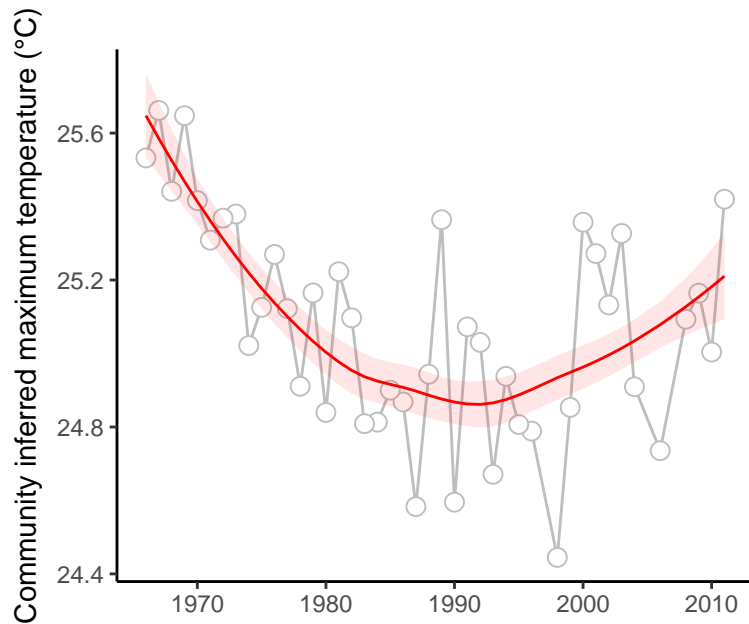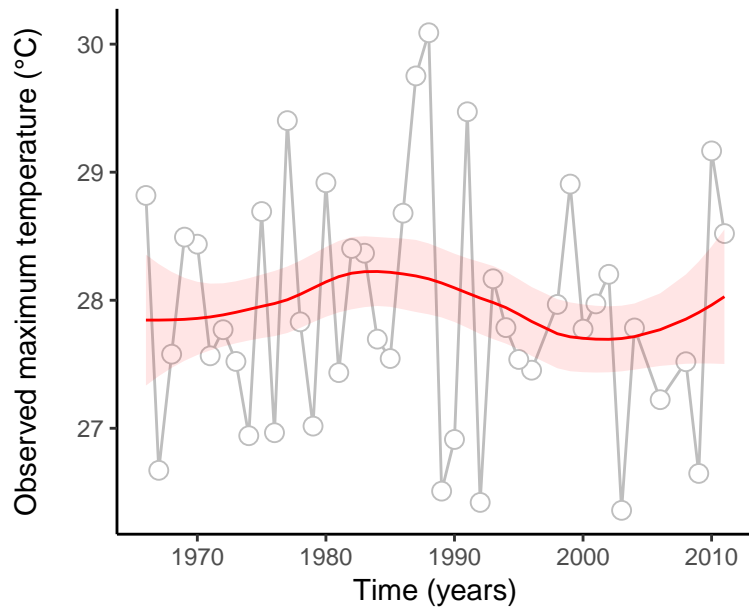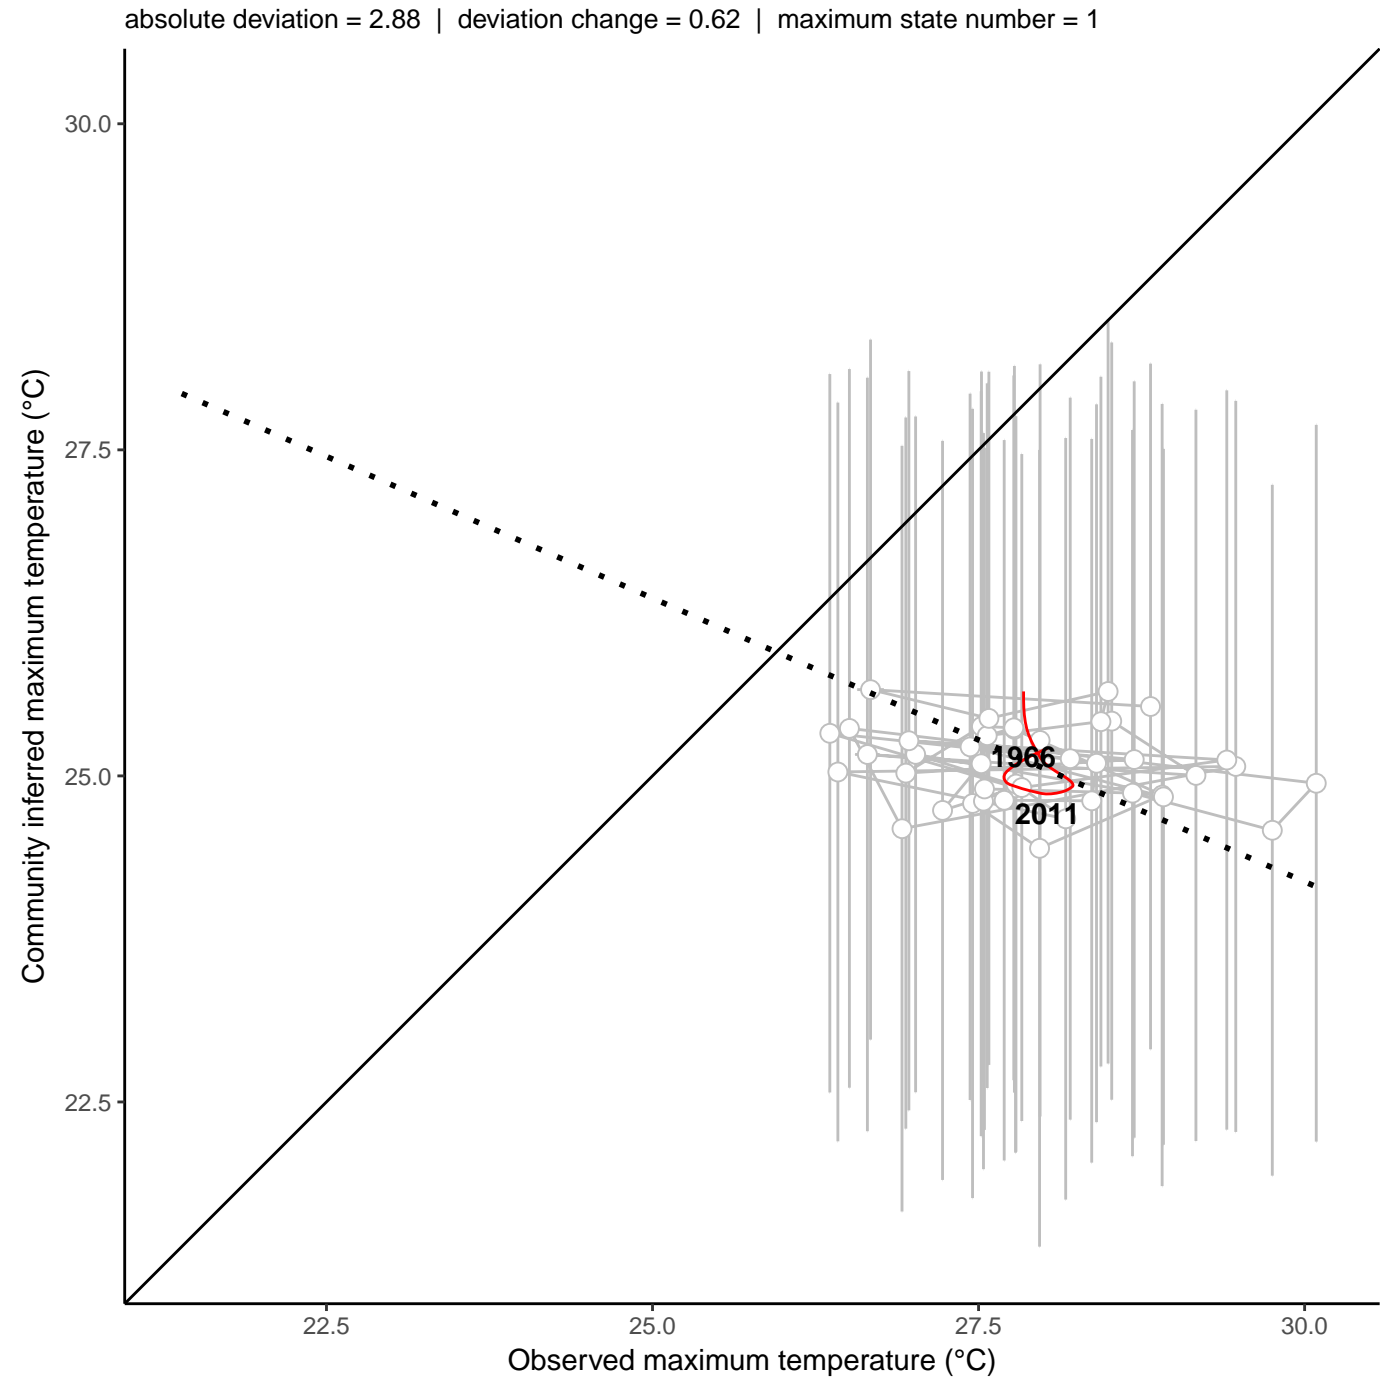



site : 840\_42\_12

absolute deviation = 4.26 | deviation change = 0.98 | maximum state number = 1

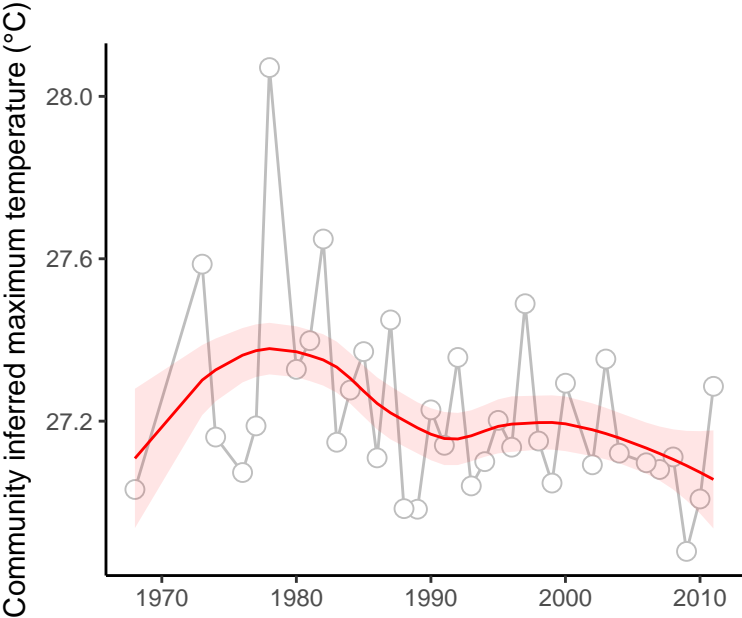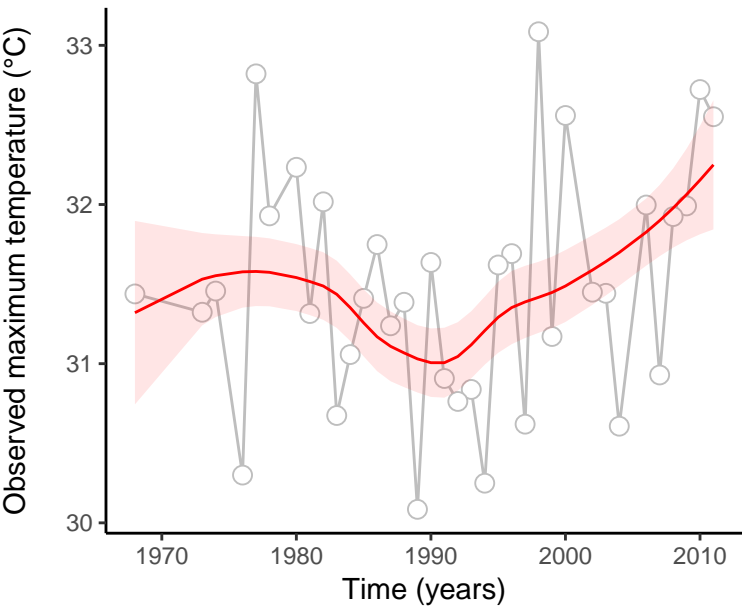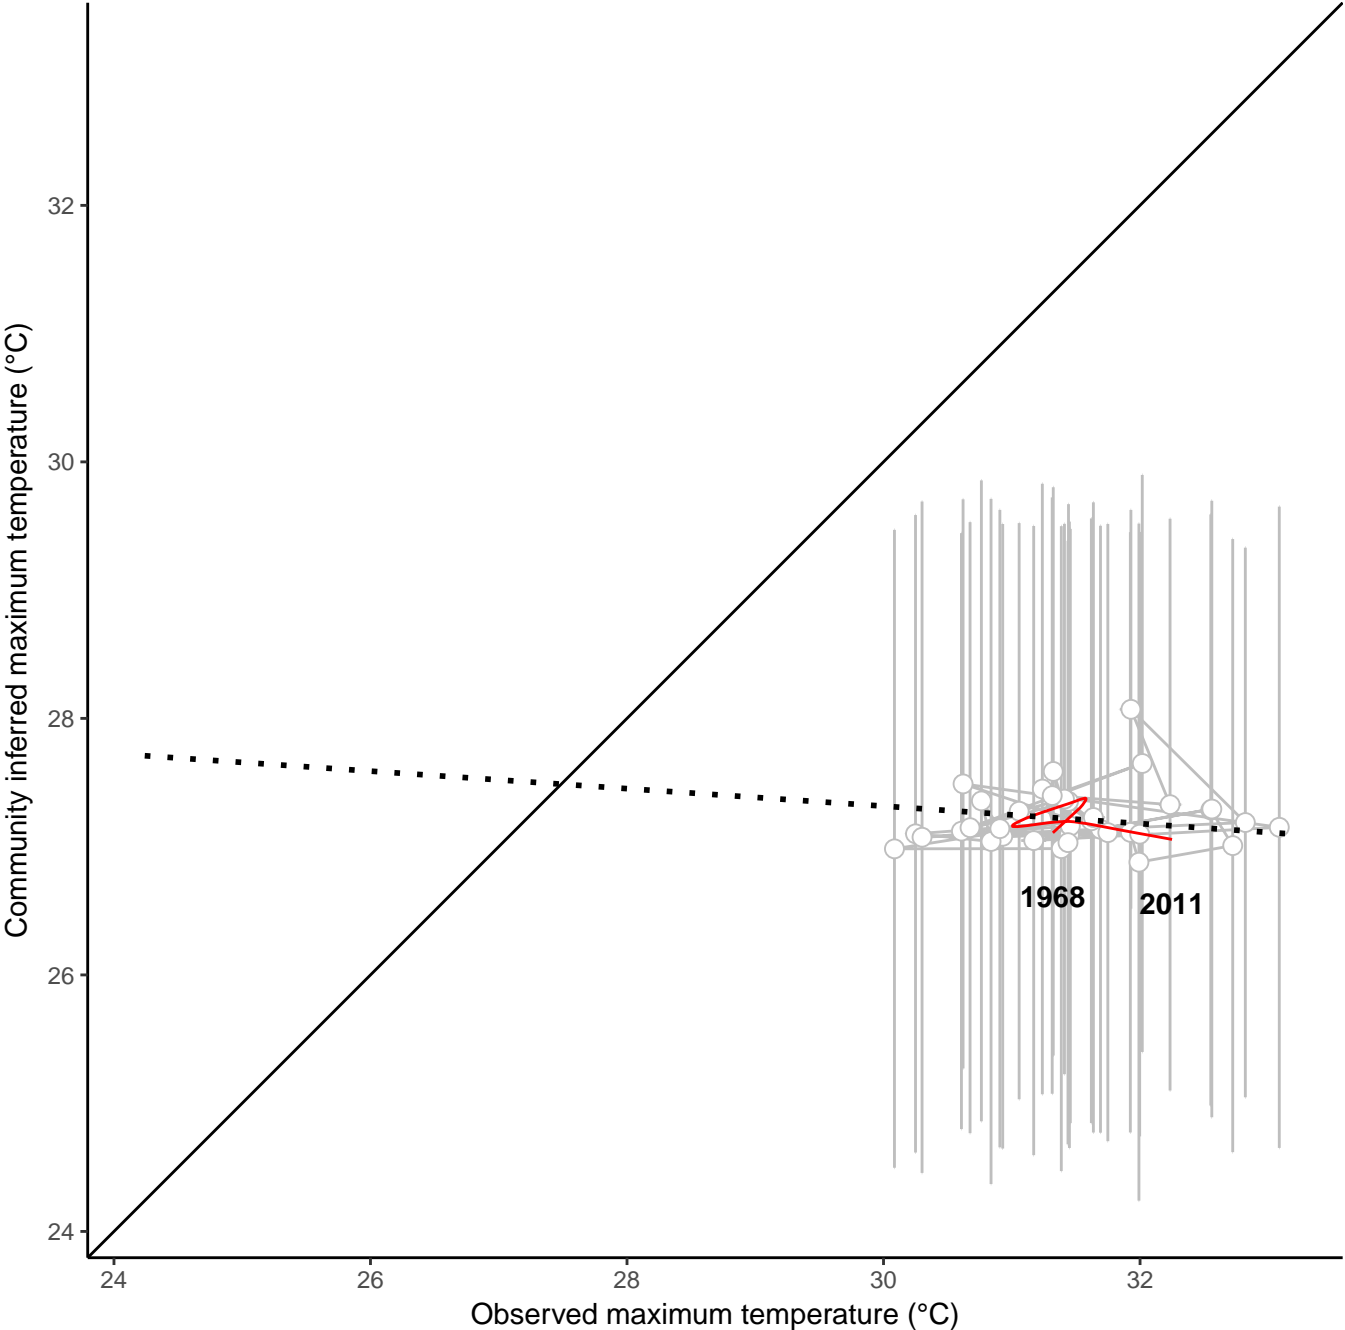

site : 840\_58\_15

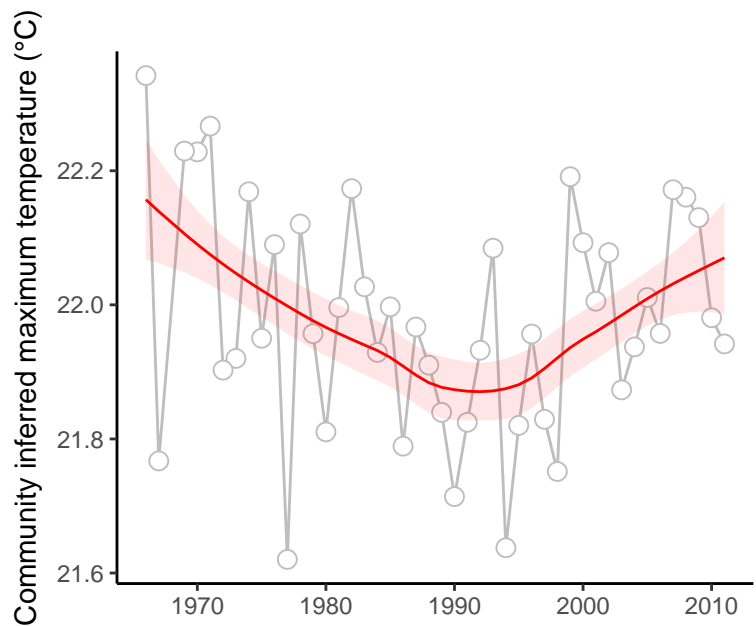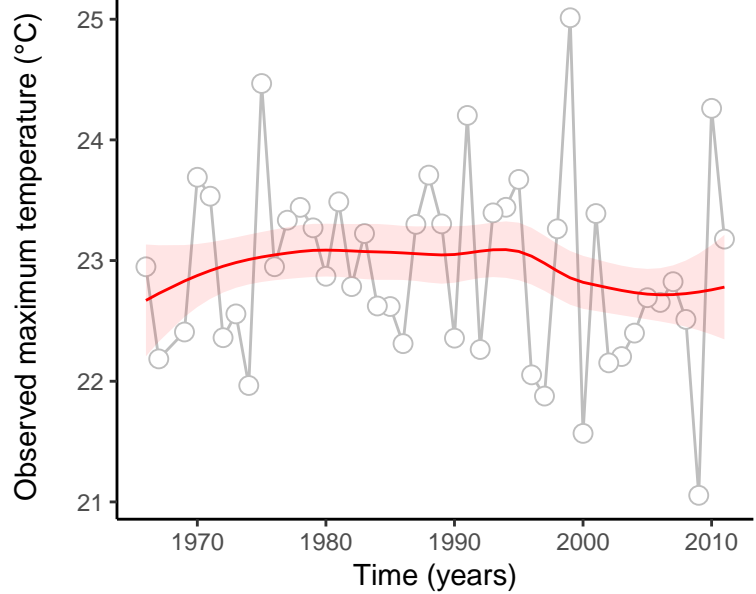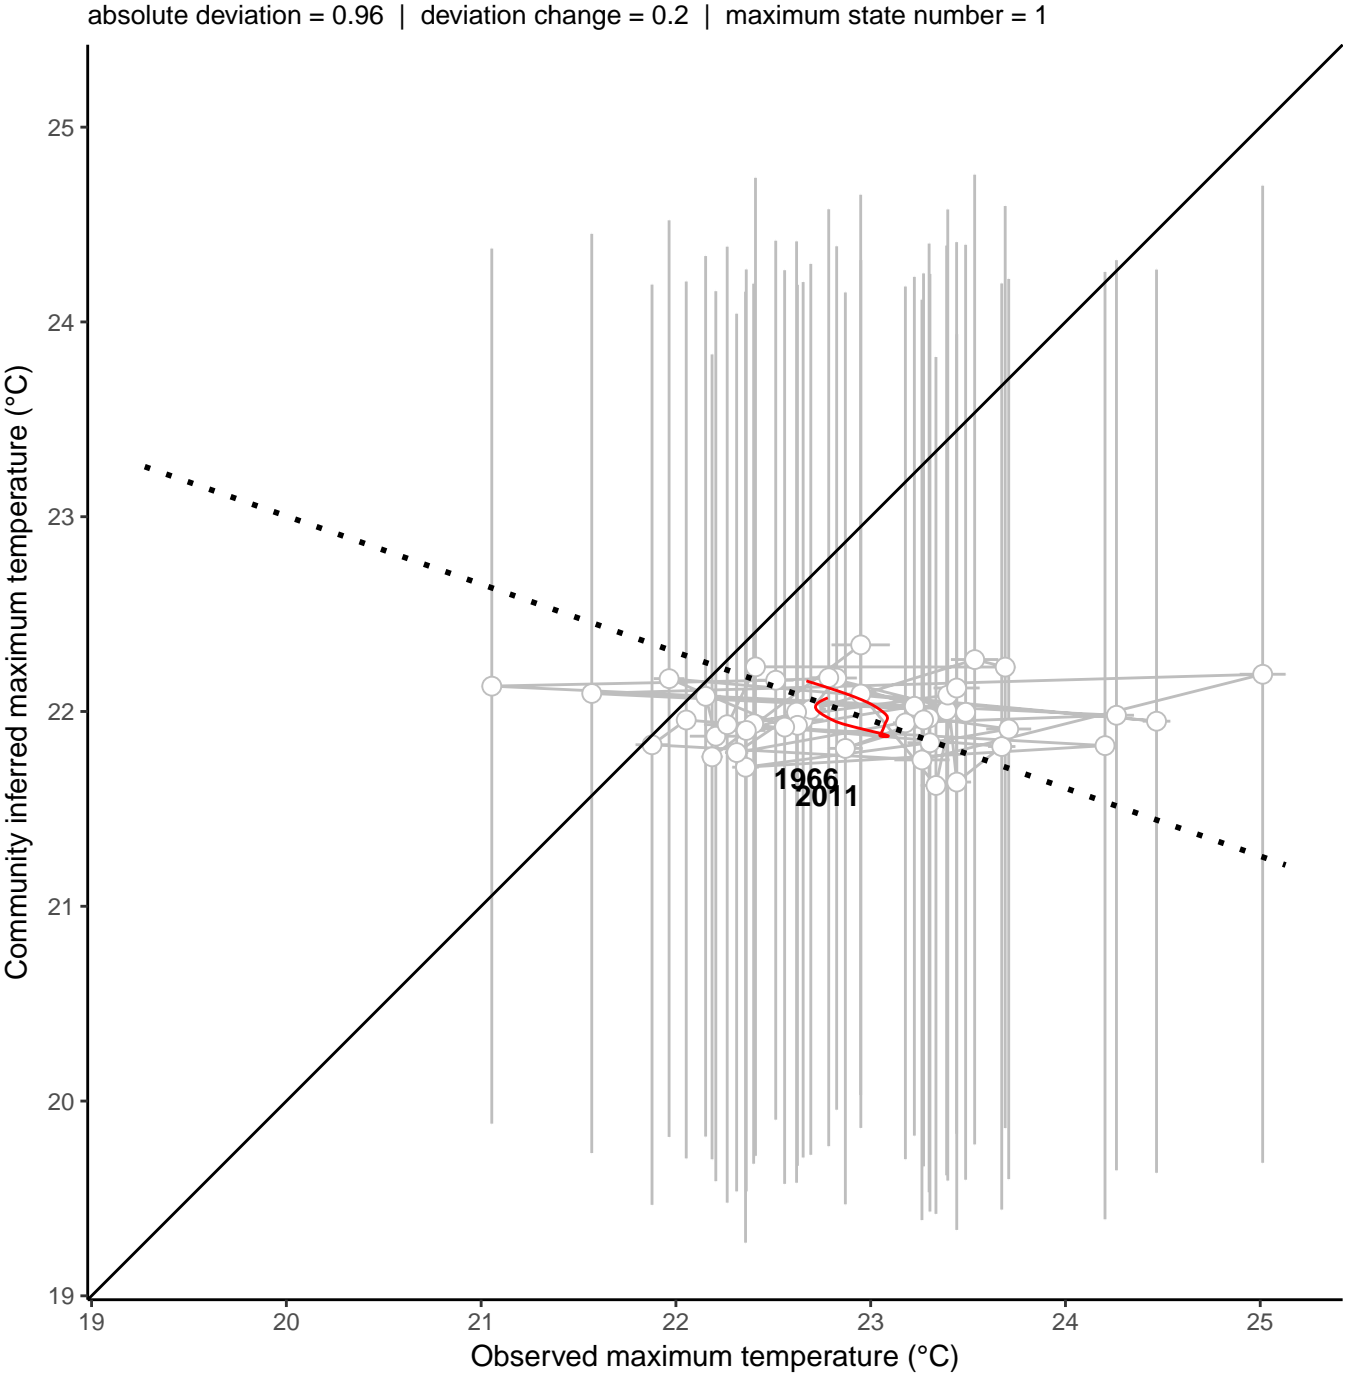

site : 840\_6\_28

absolute deviation = 3.84 | deviation change = 0.08 | maximum state number = 1

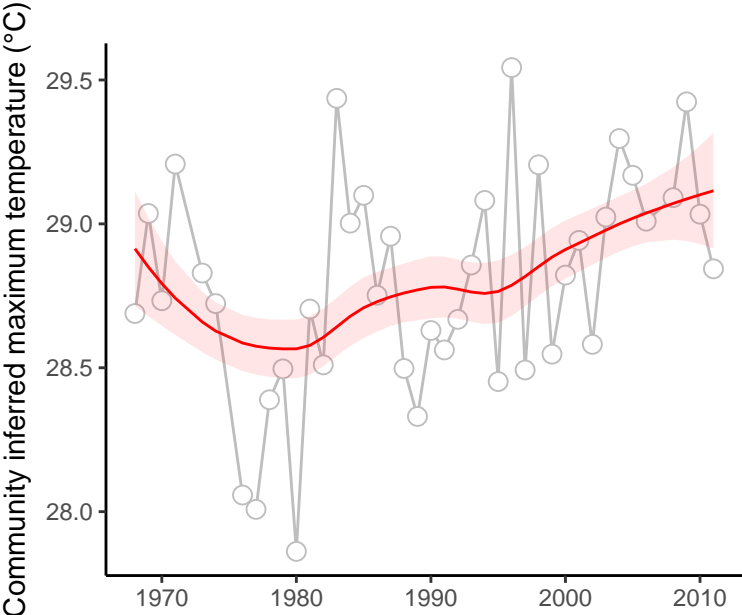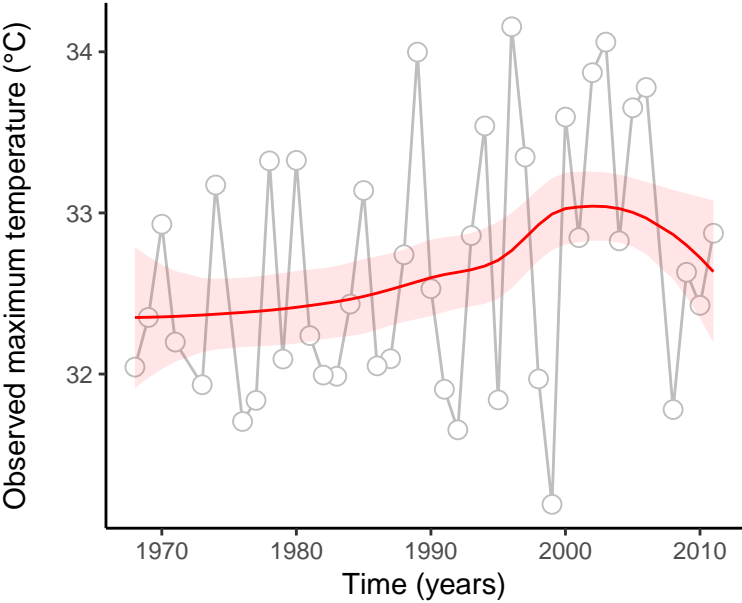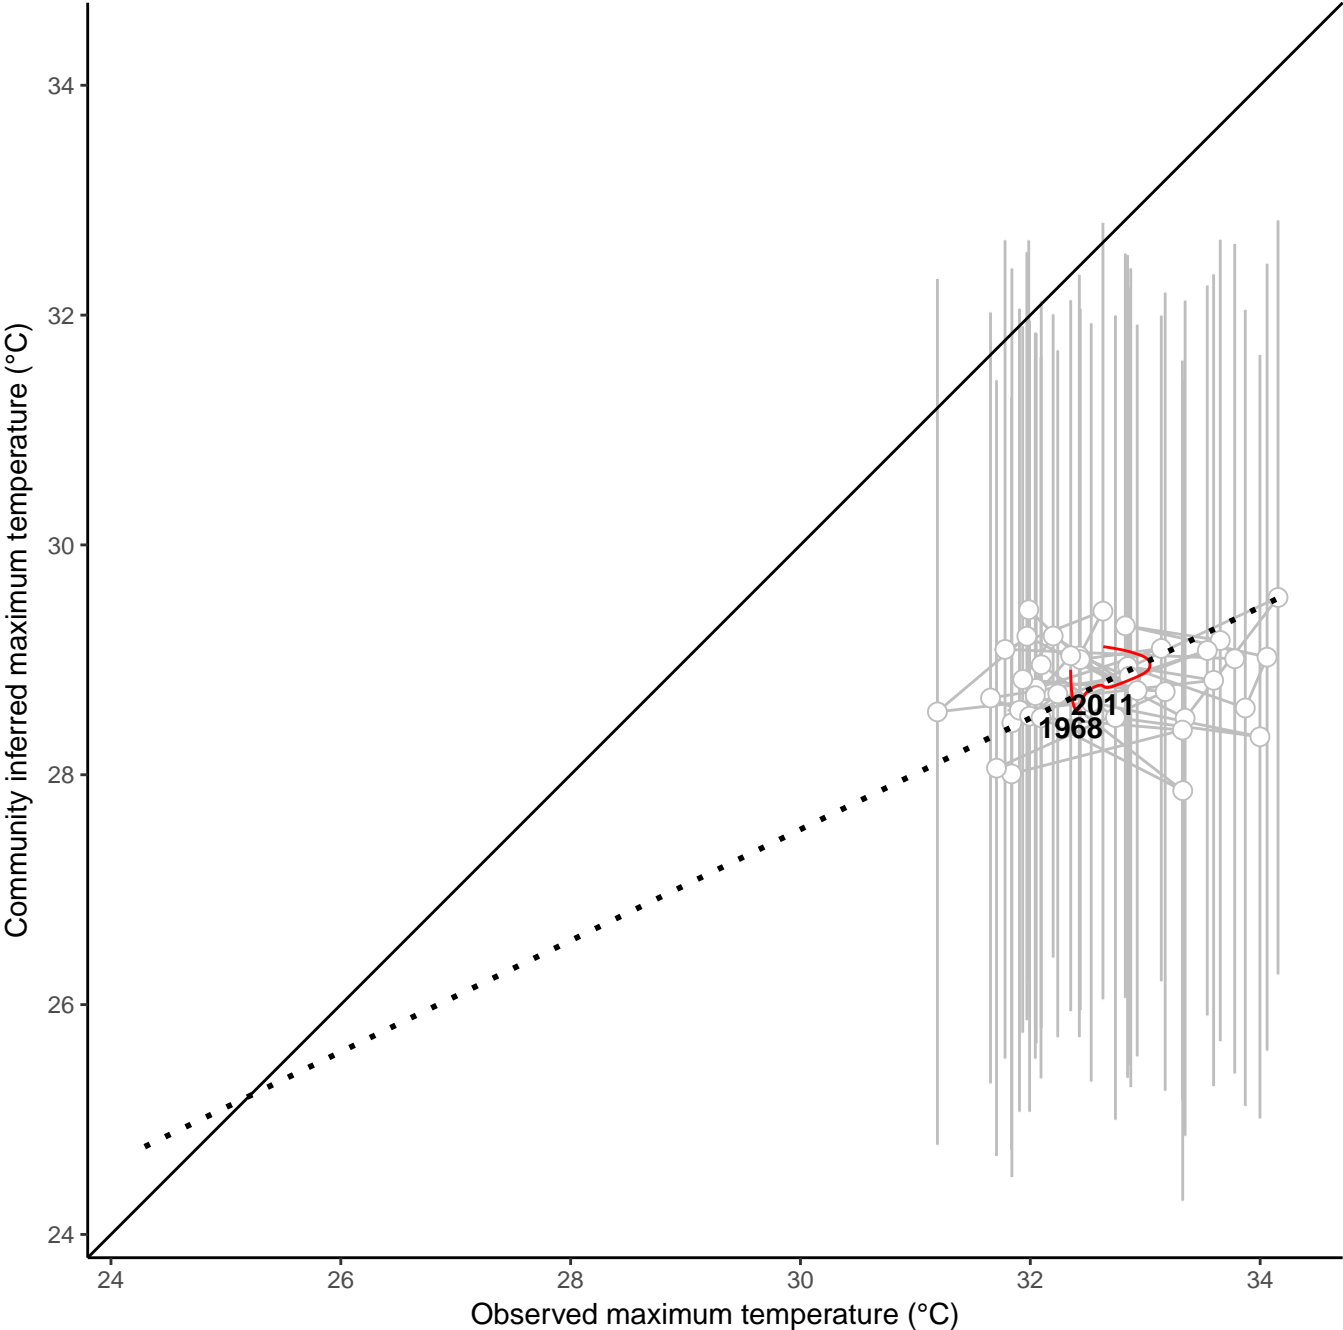

site : 840\_67\_16

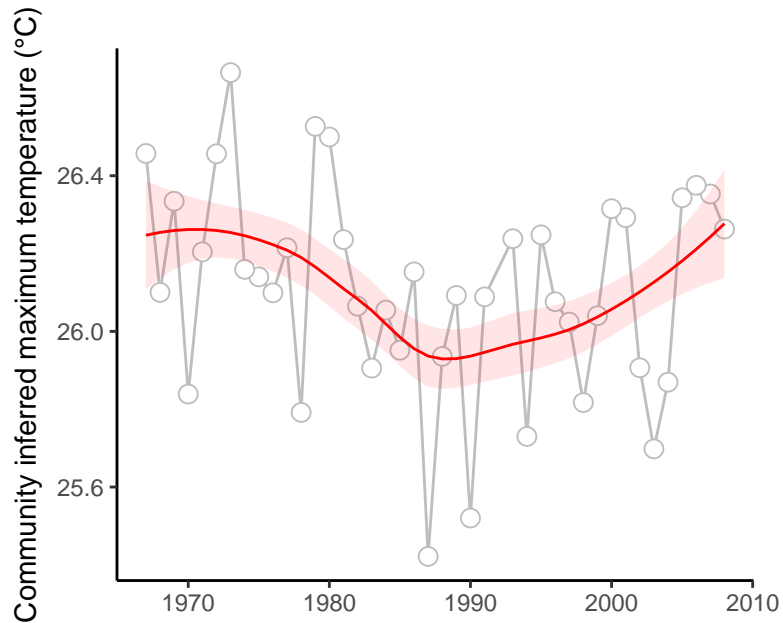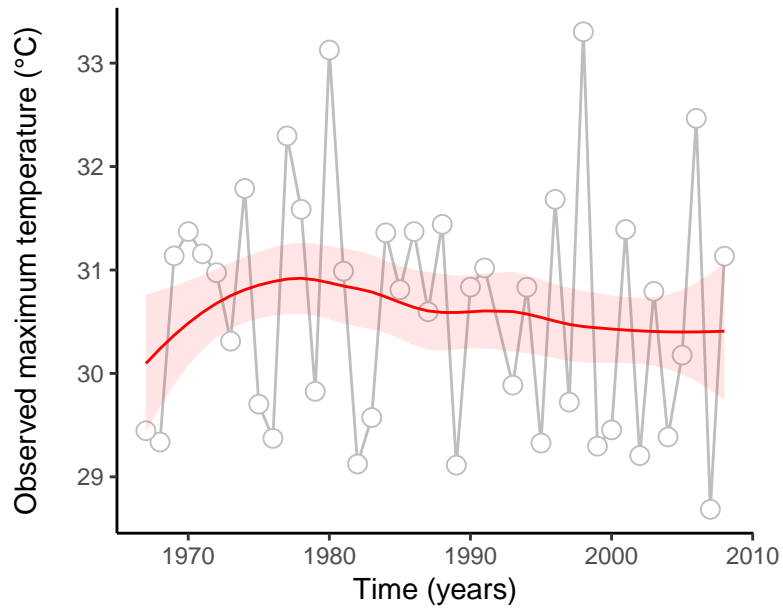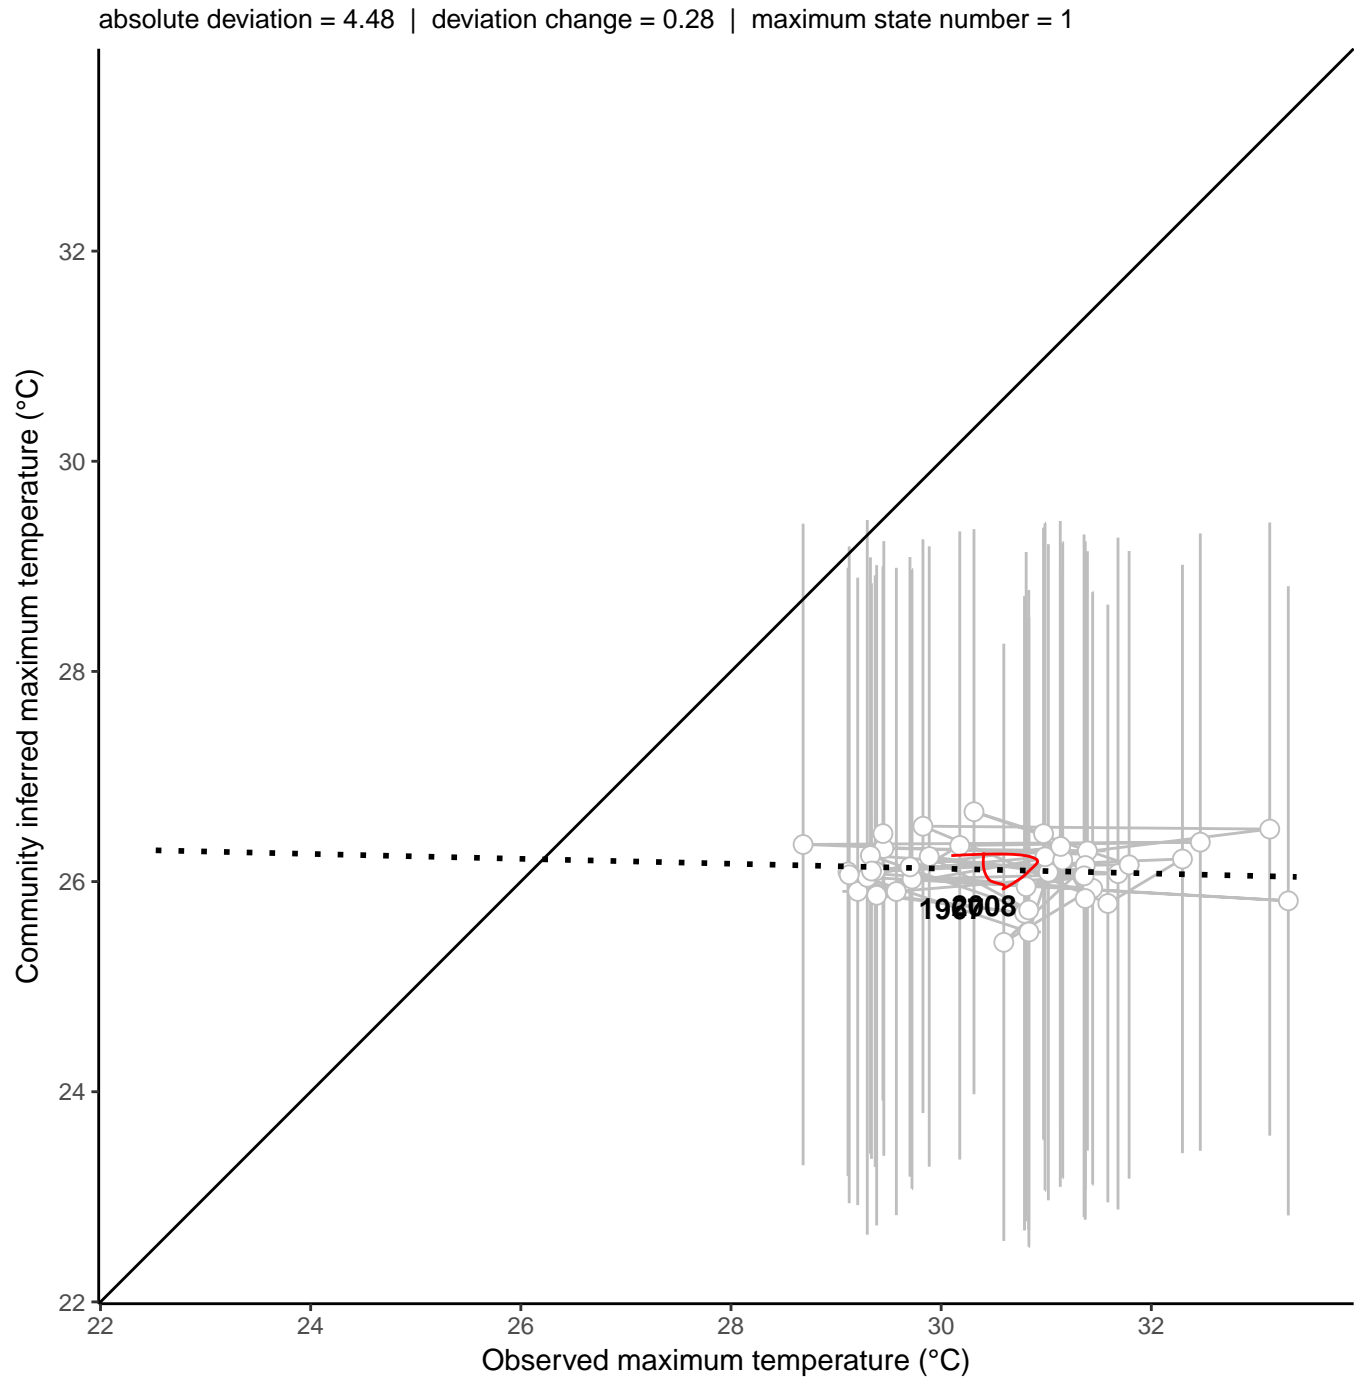

site : 840\_69\_25

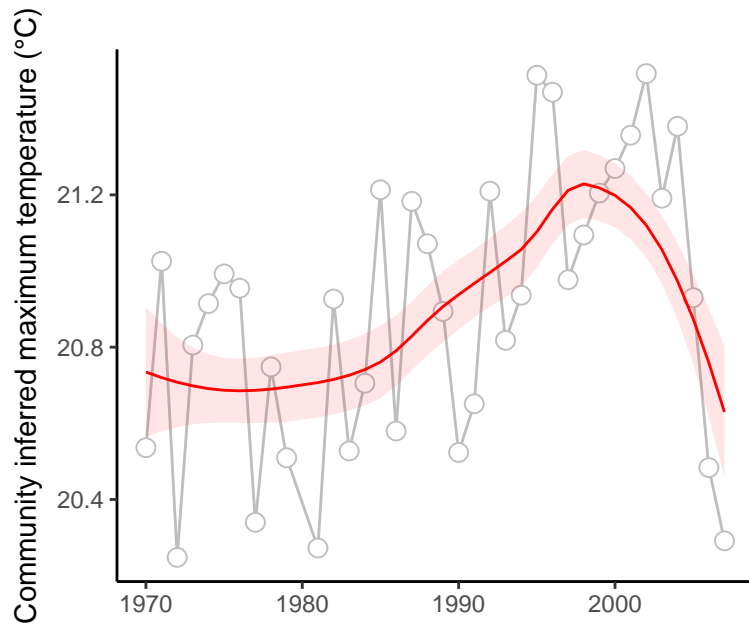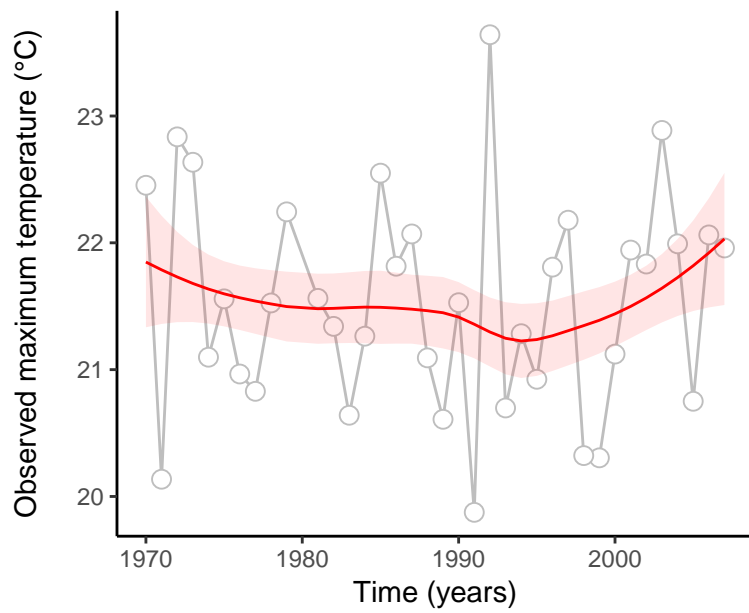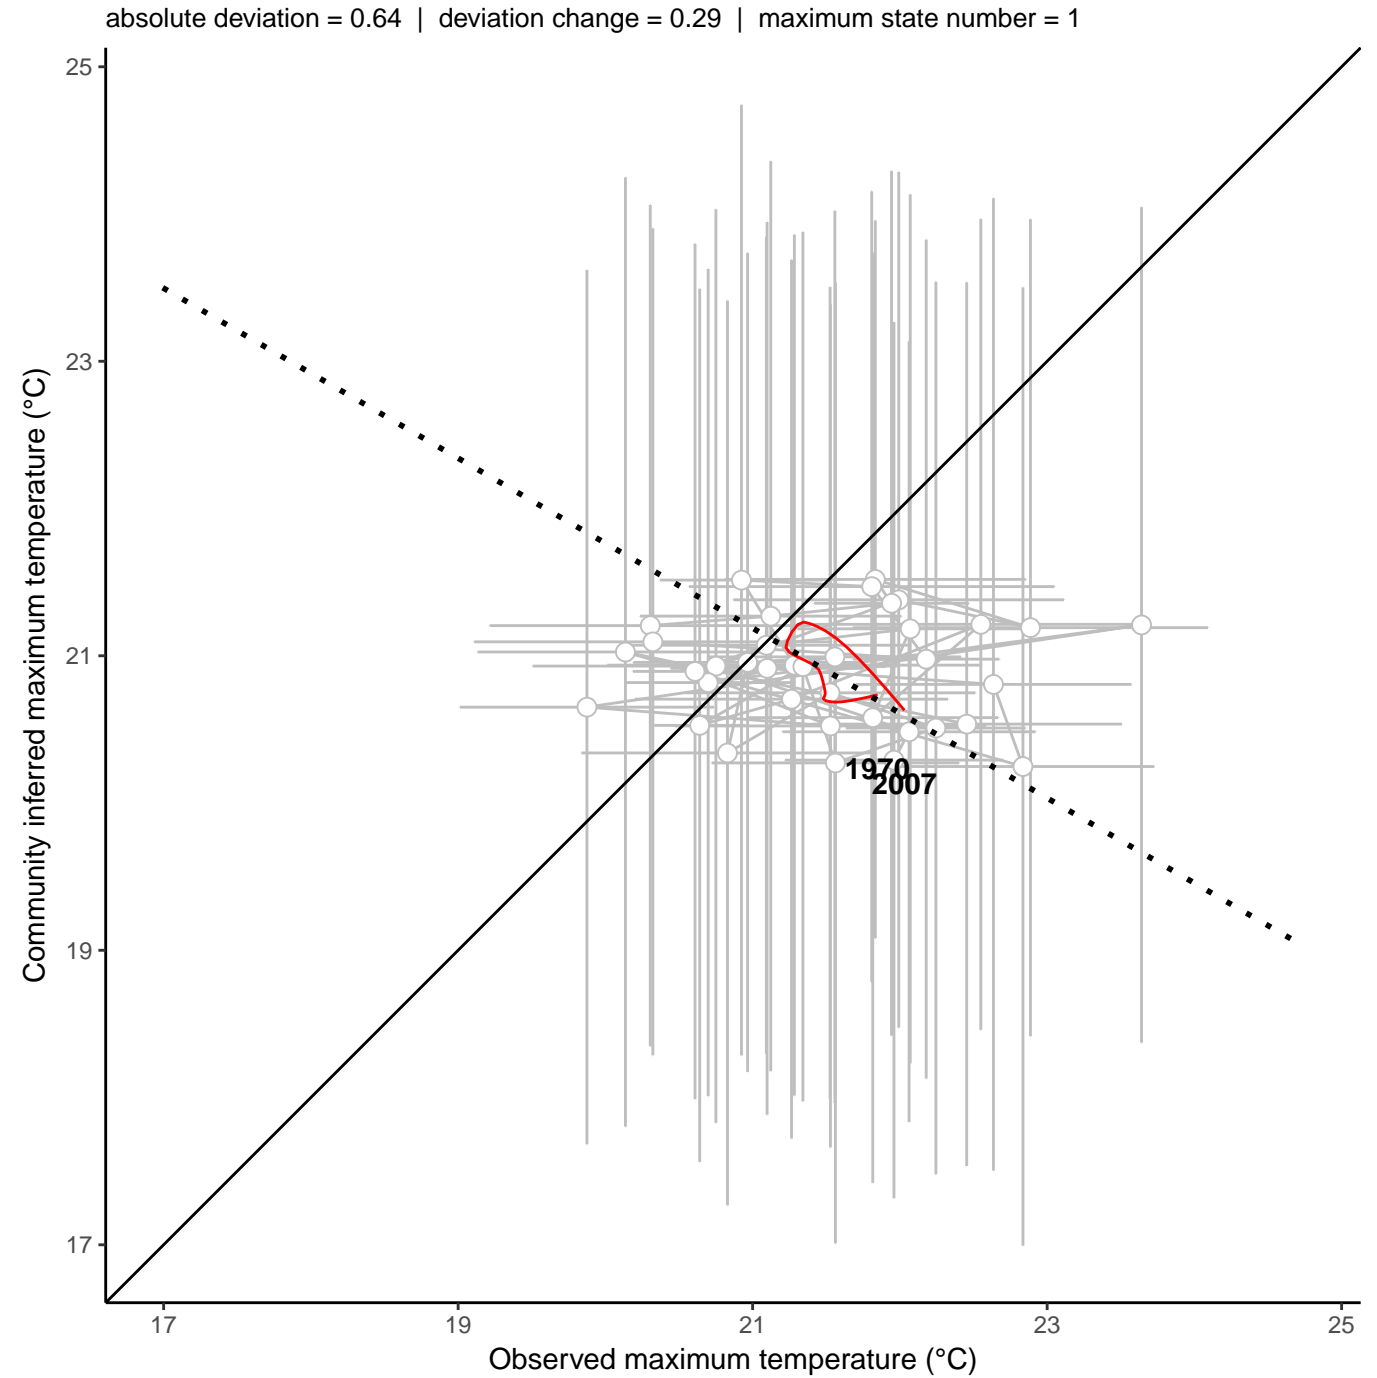

site : 840\_7\_21

absolute deviation = 4.07 | deviation change = 0.49 | maximum state number = 1

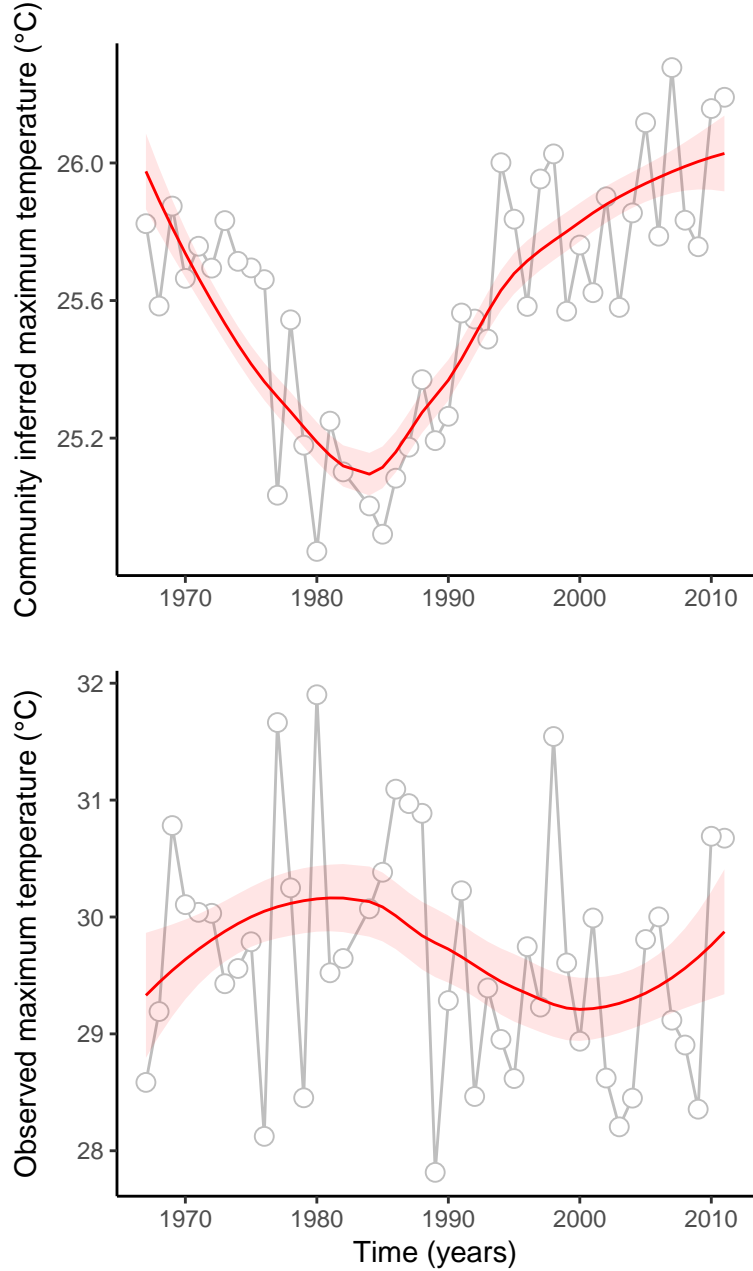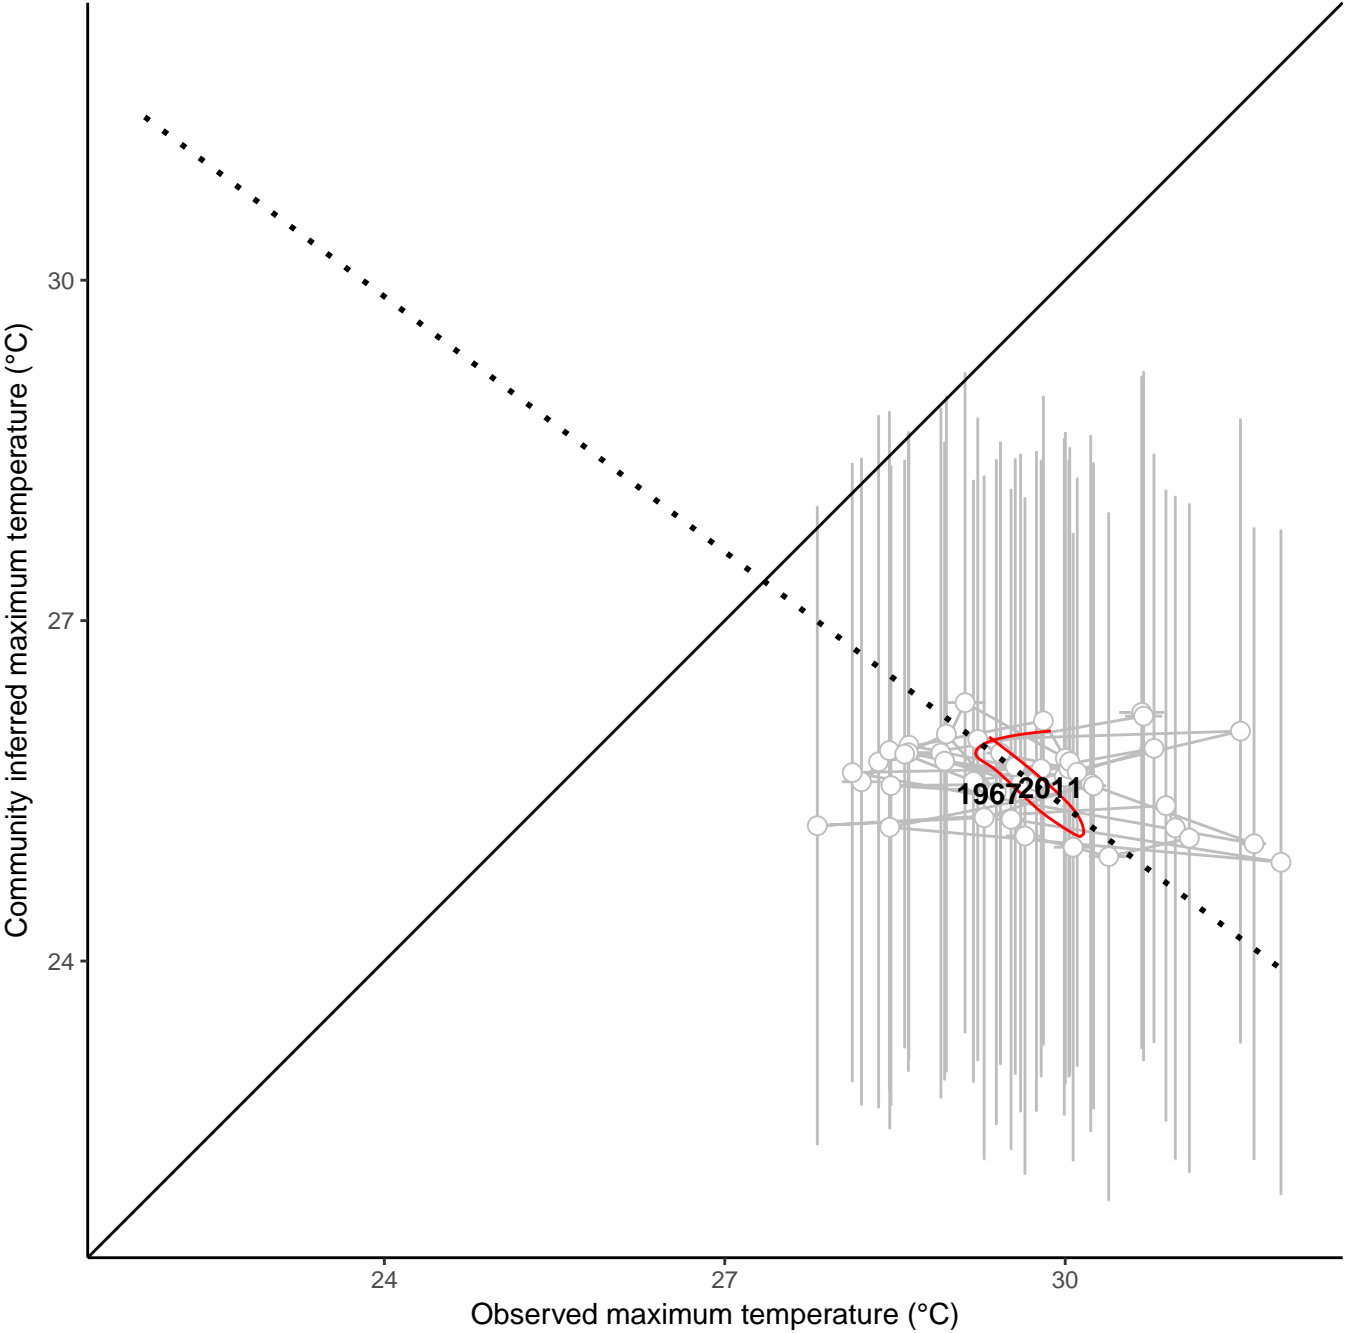

site : 840\_88\_14

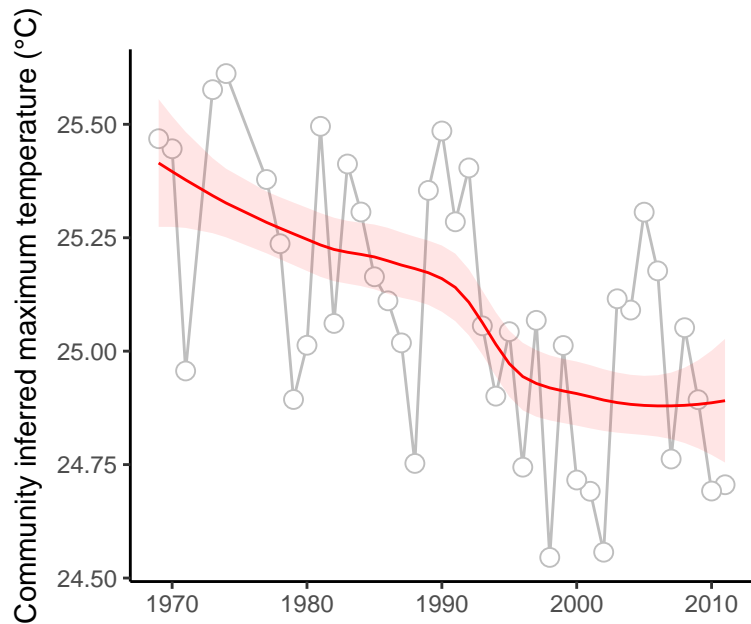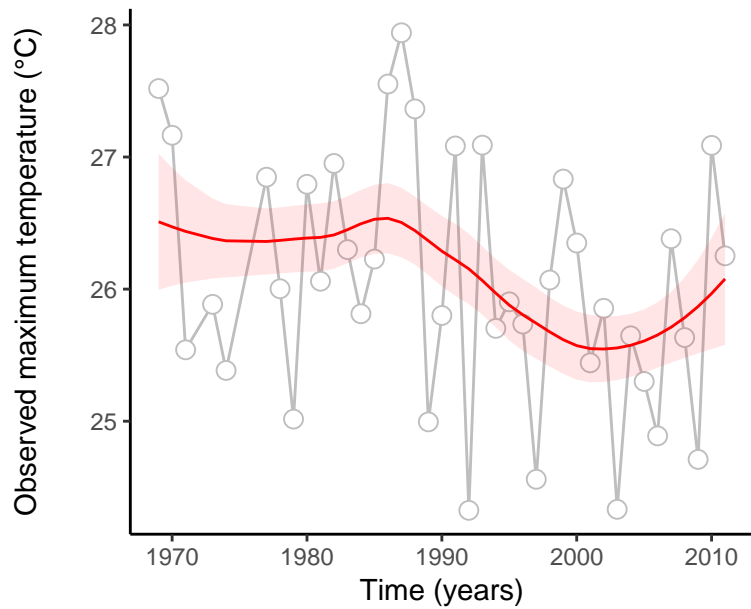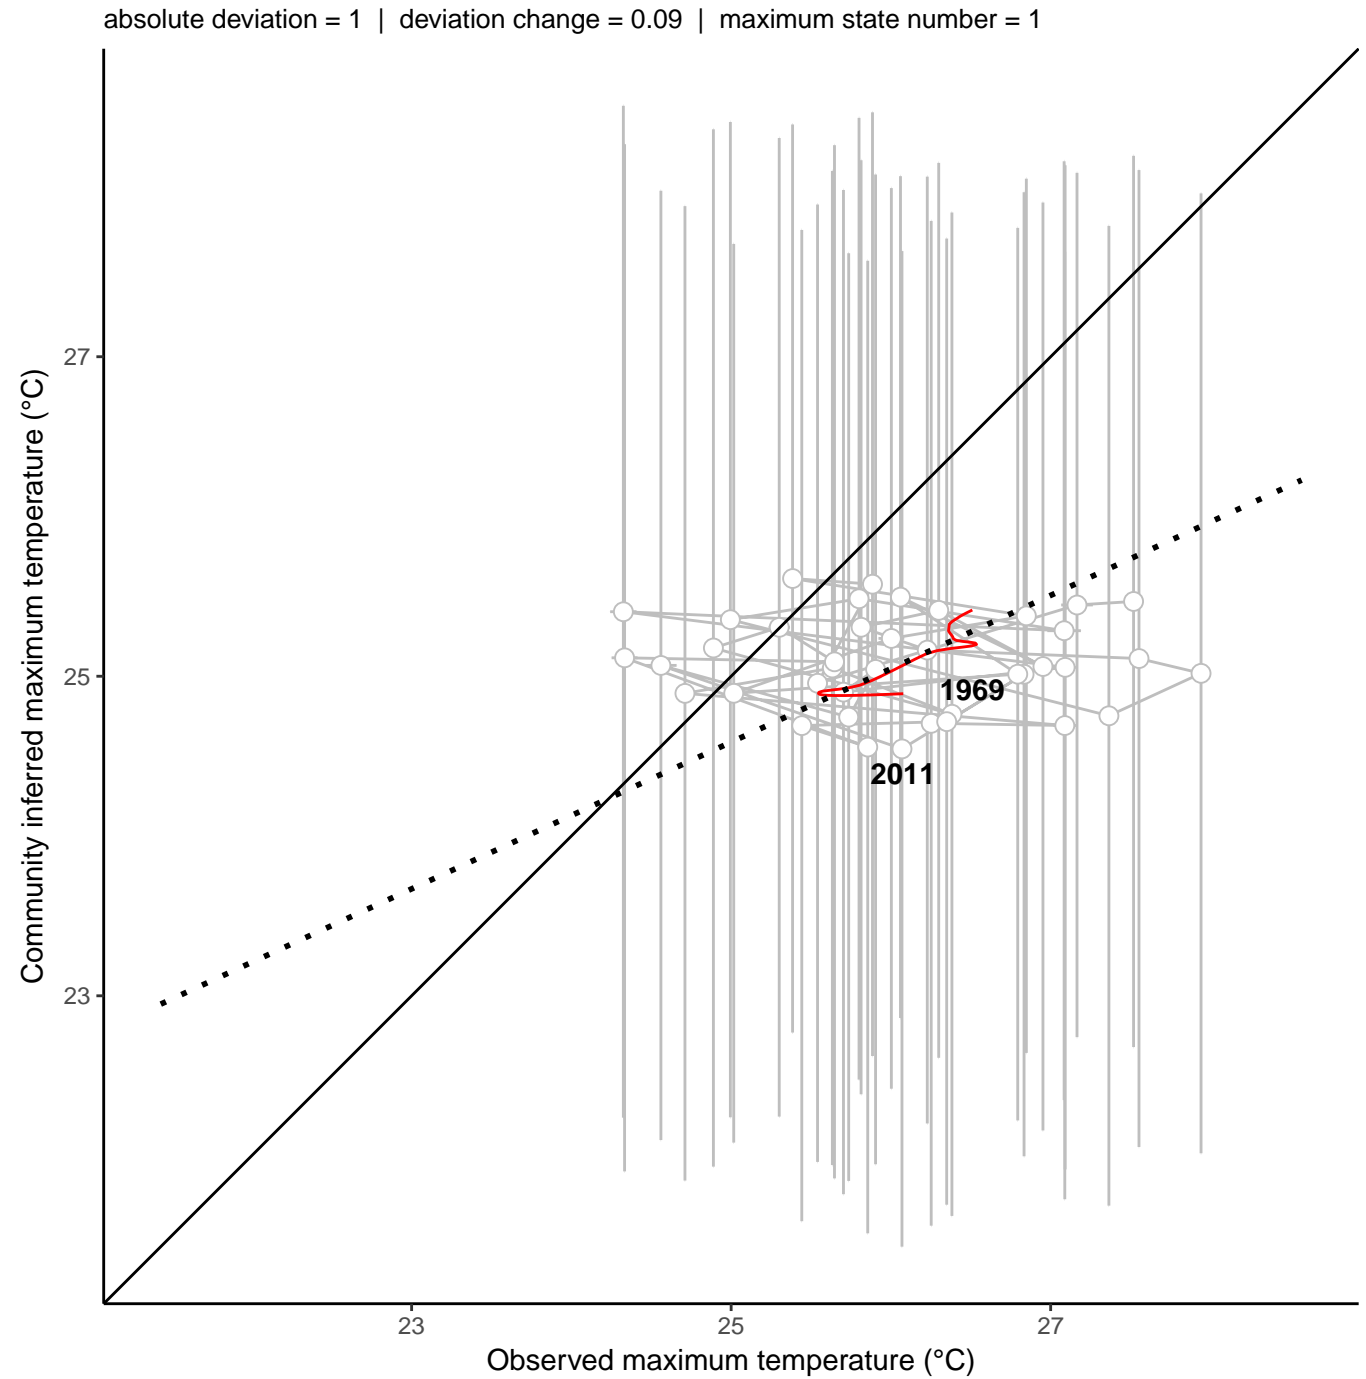

site : 840\_91\_57

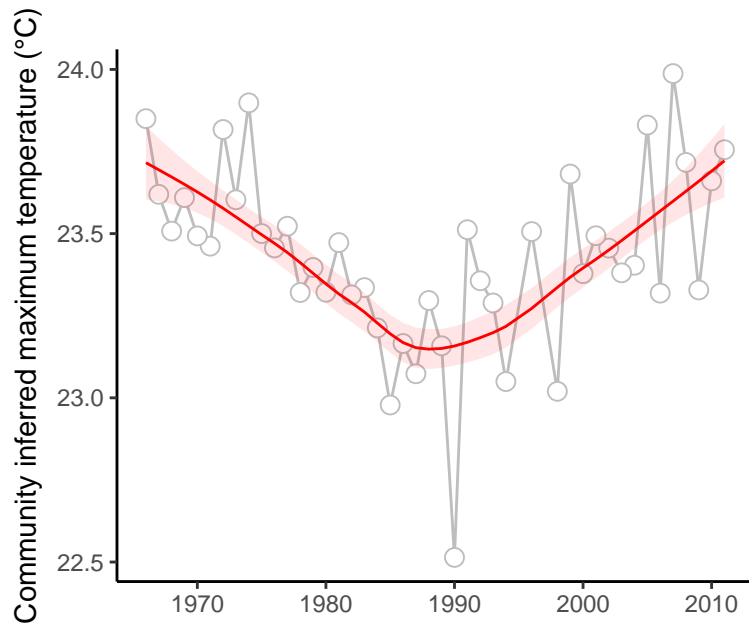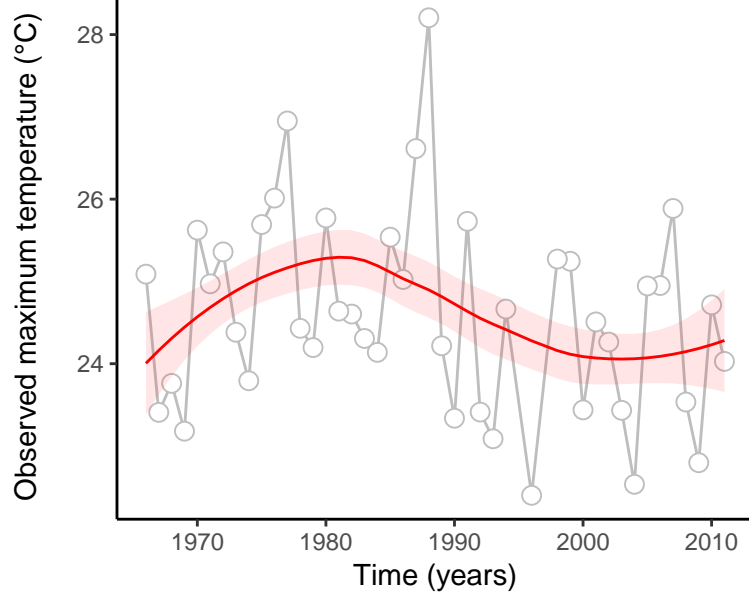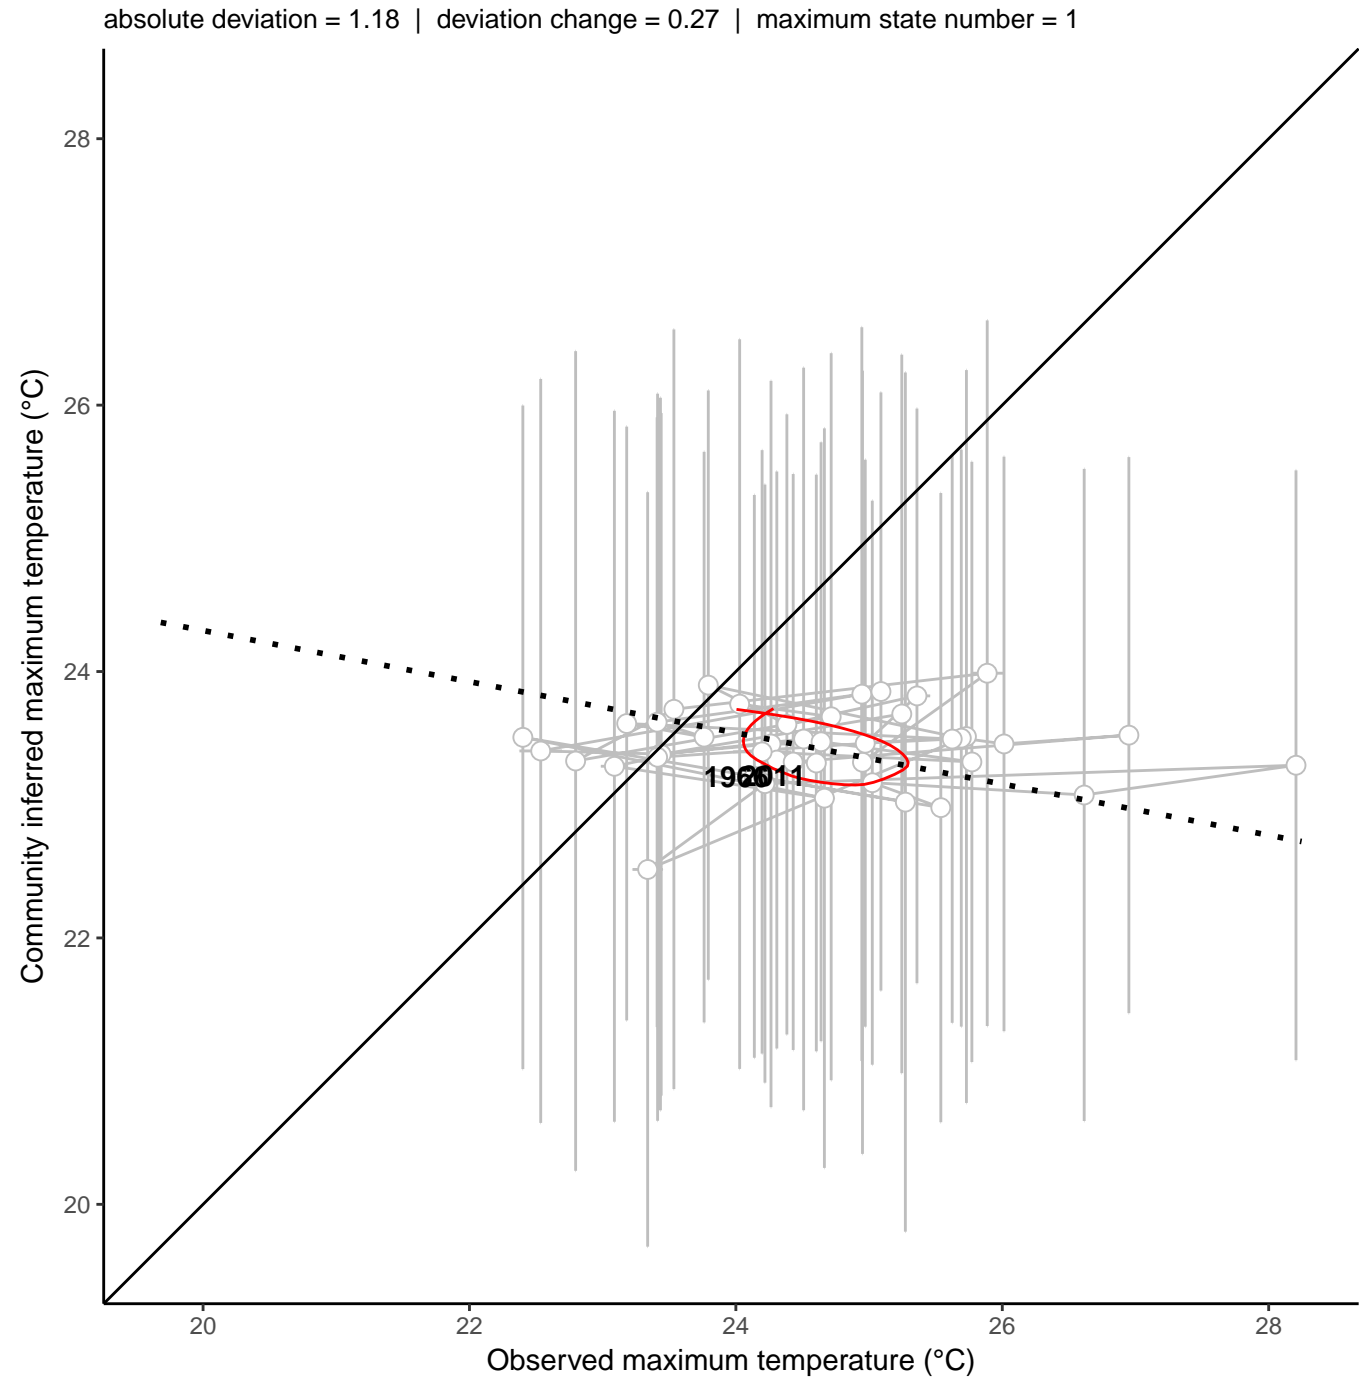



site : 840\_14\_190

absolute deviation = 4.9 | deviation change = -1.74 | maximum state number = 1

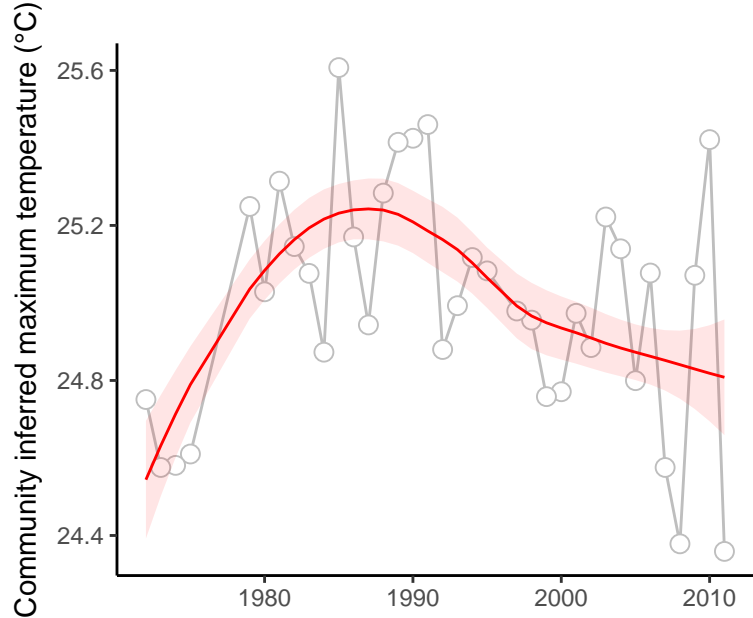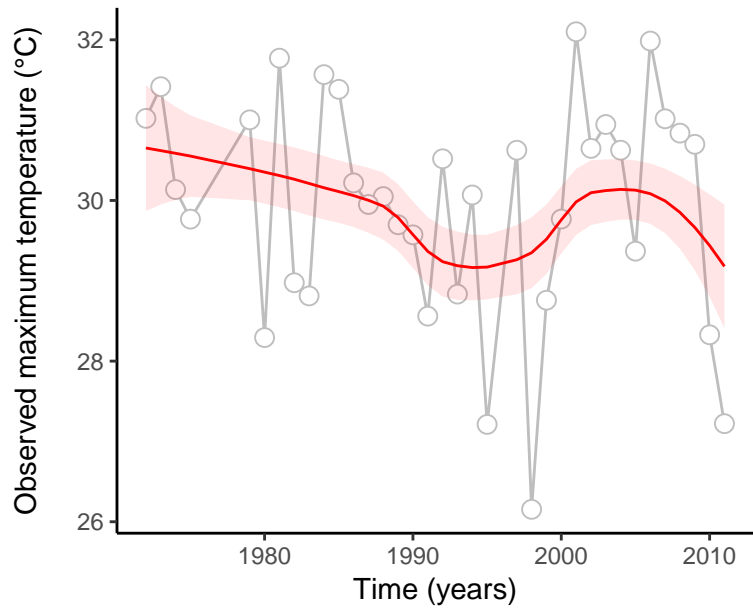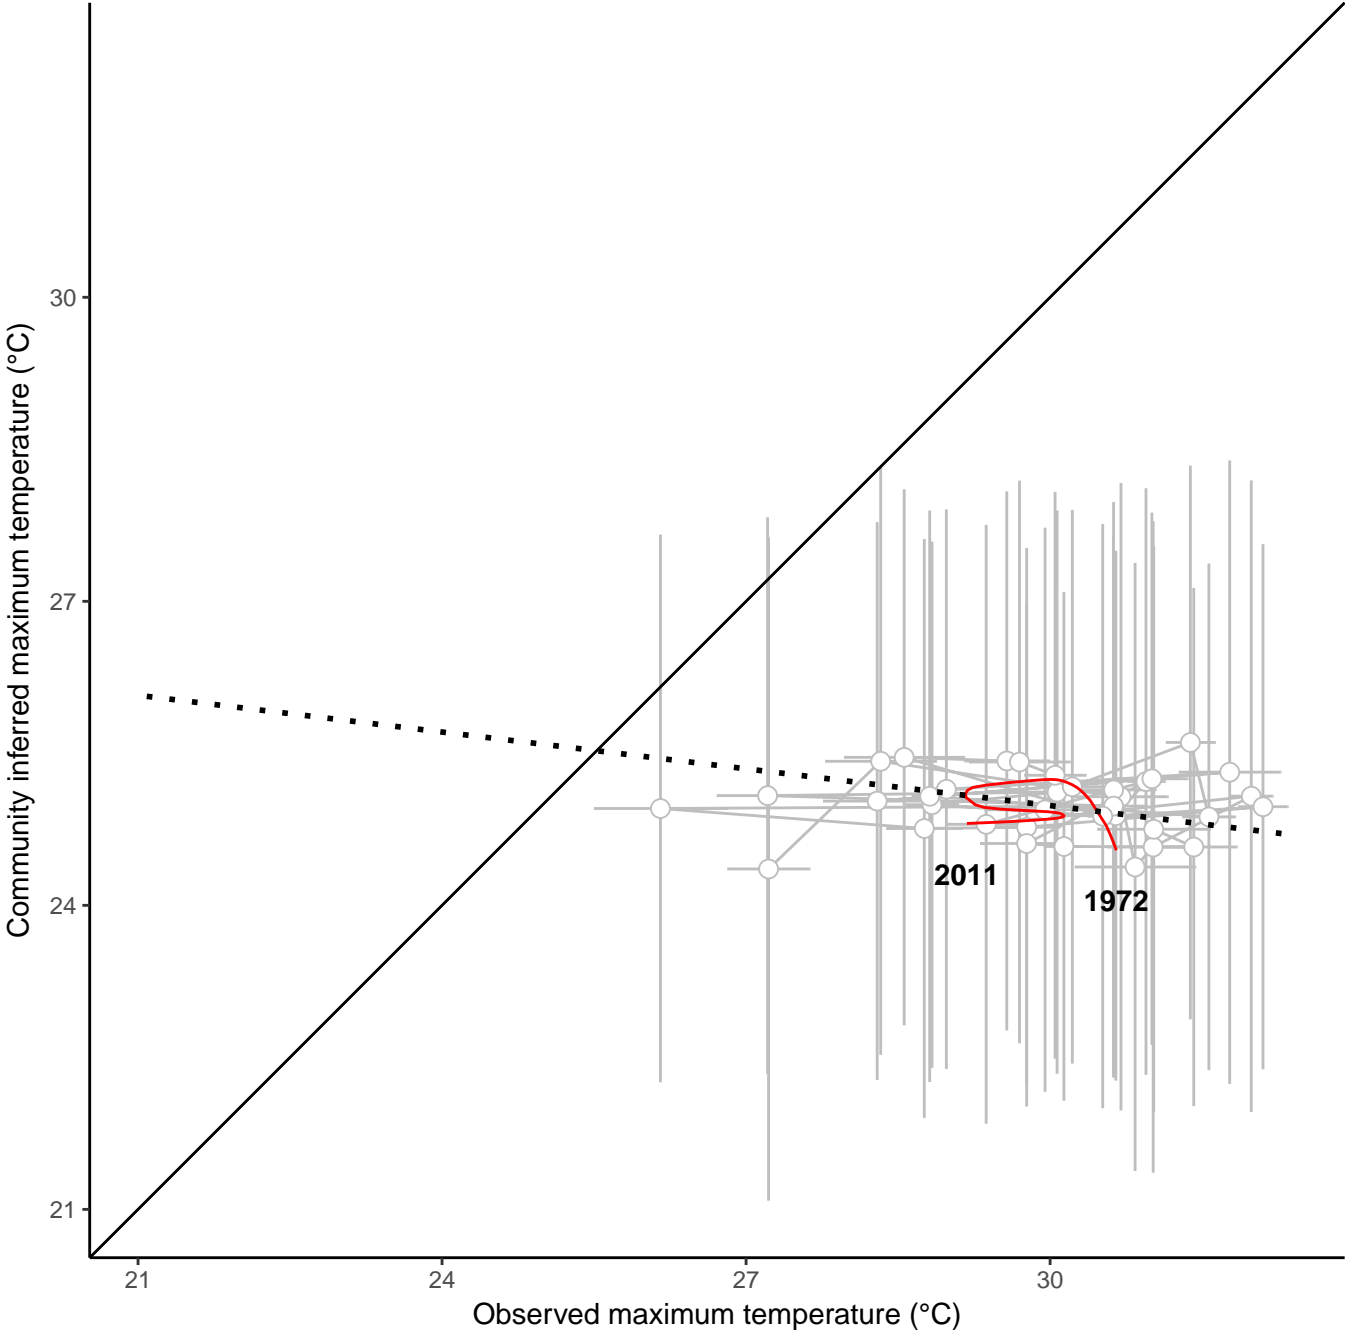

site : 840\_14\_53

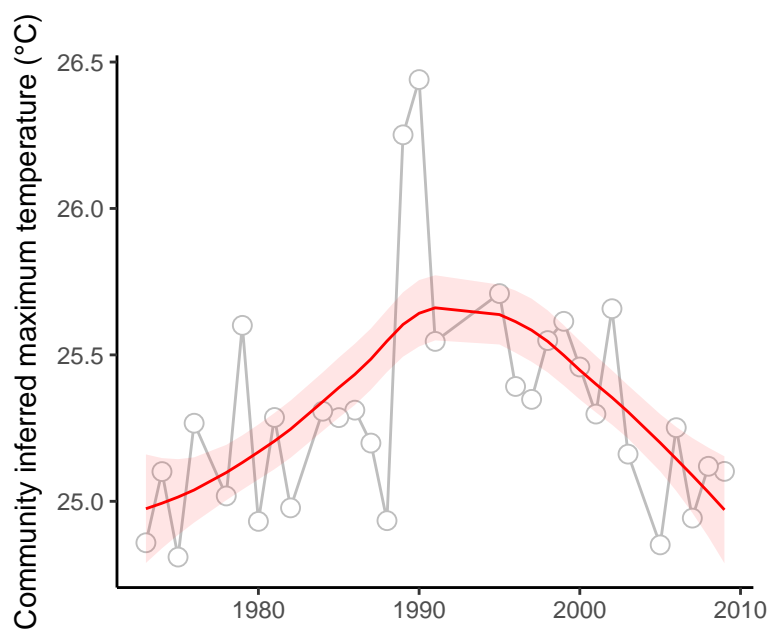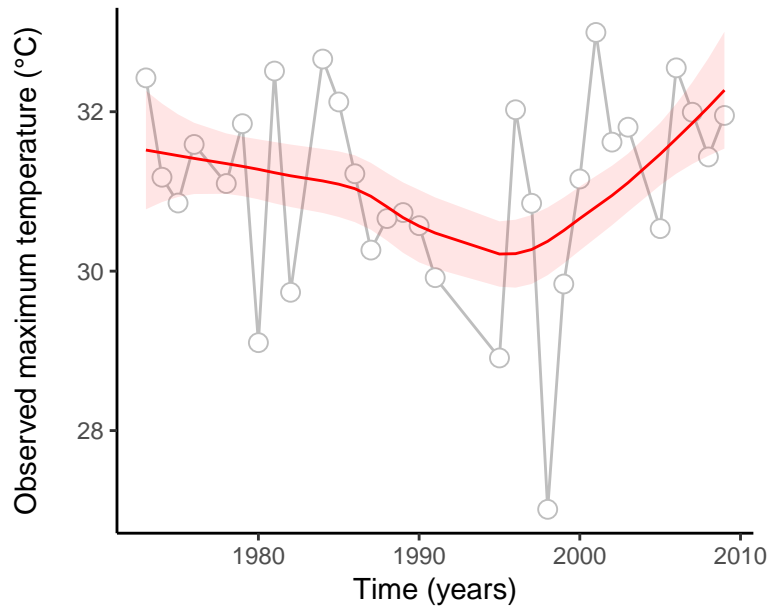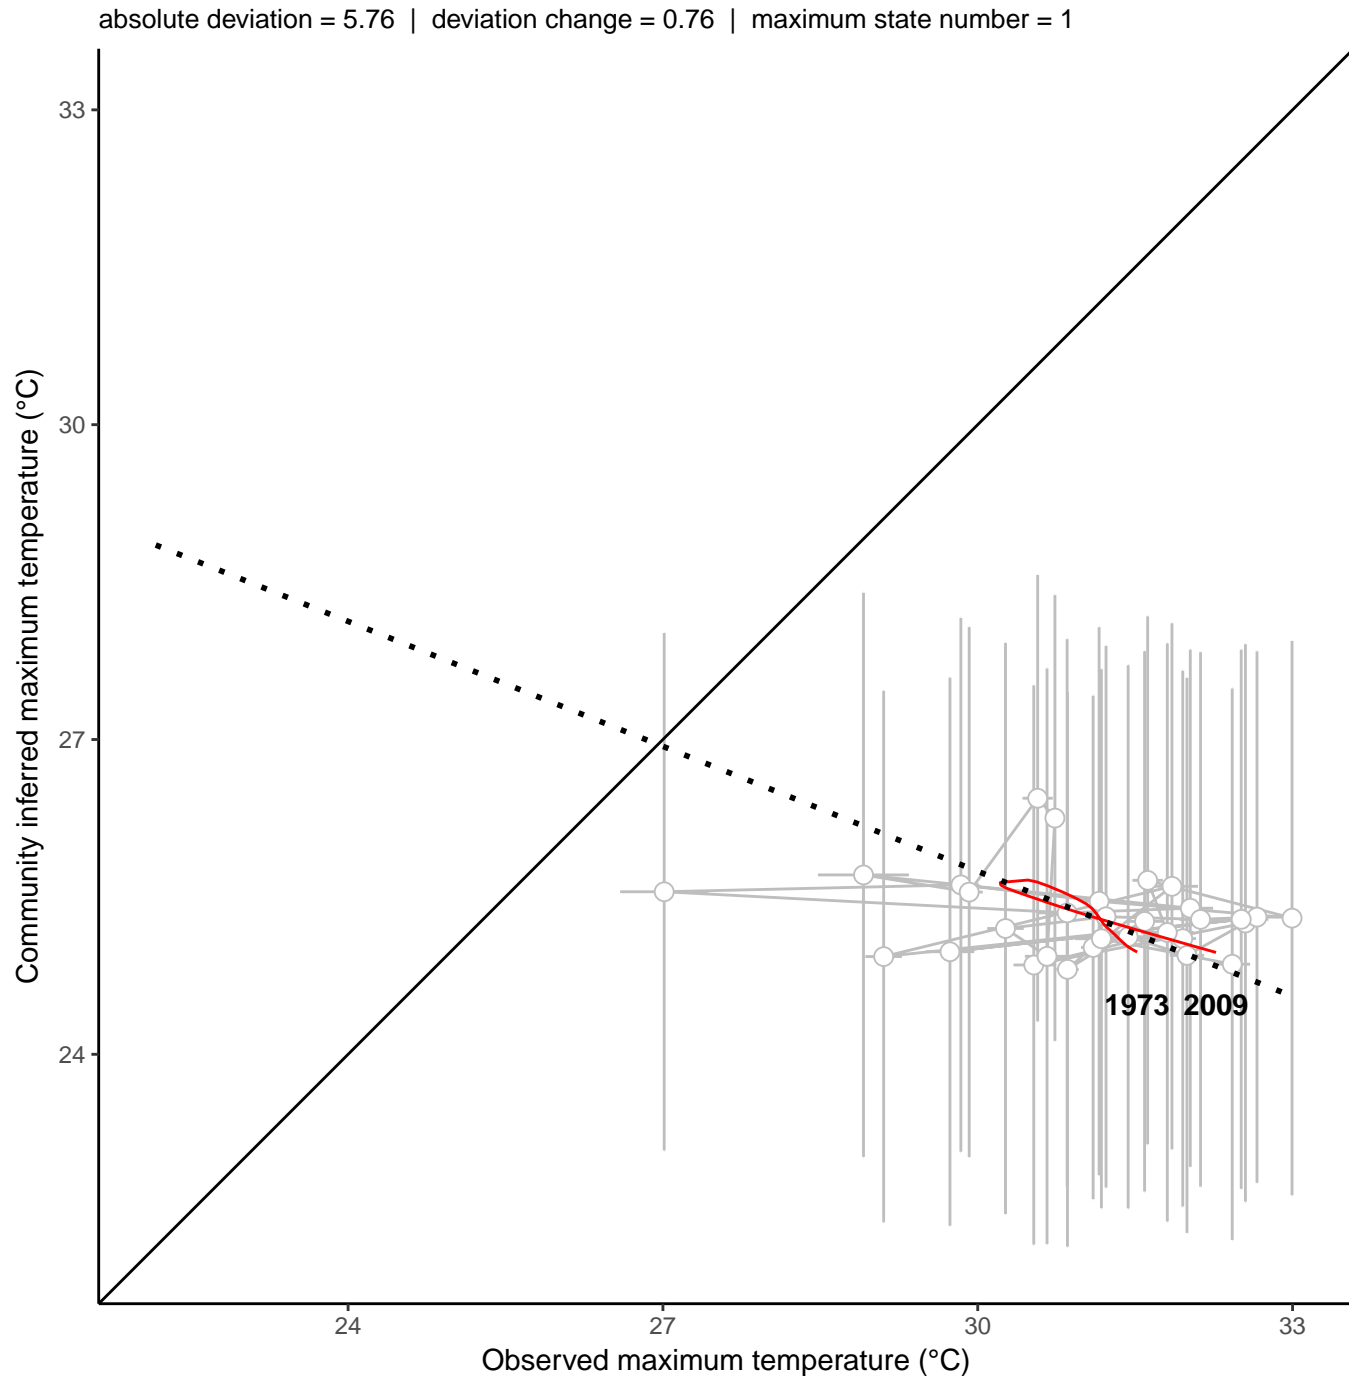

site : 840\_17\_4

absolute deviation = 2.11 | deviation change = -0.67 | maximum state number = 1

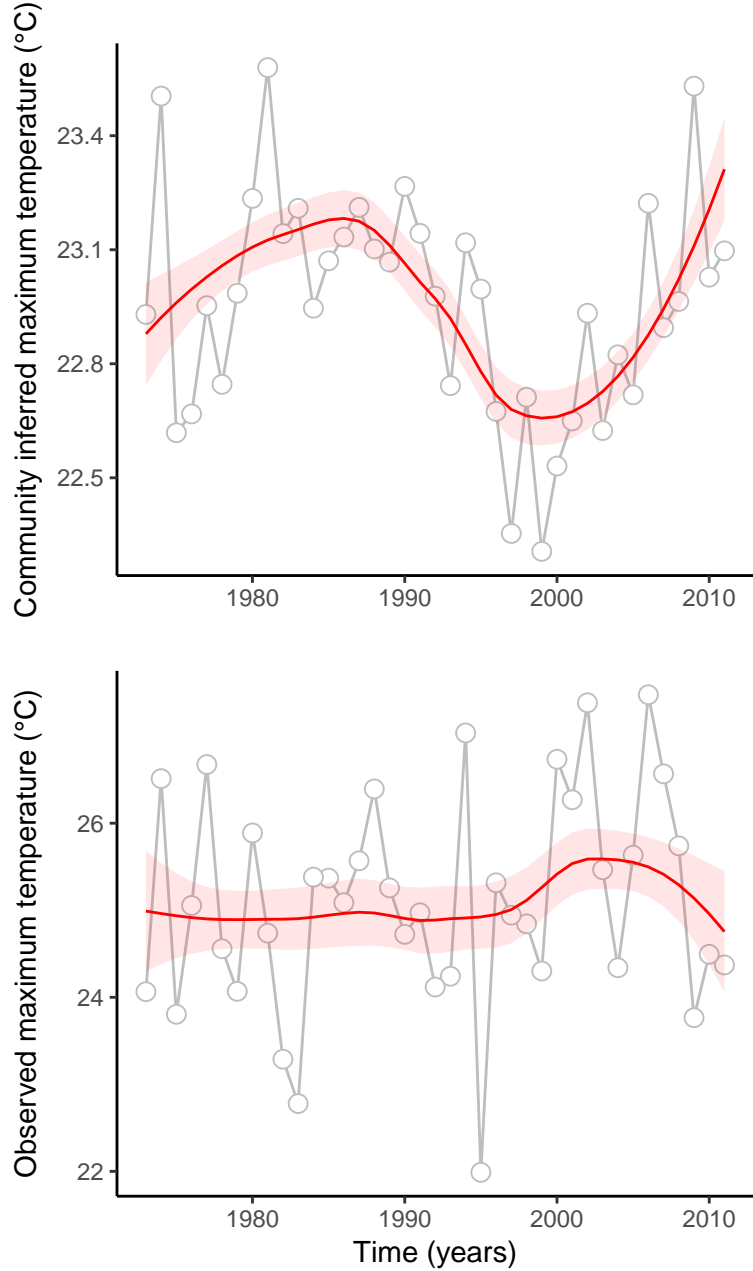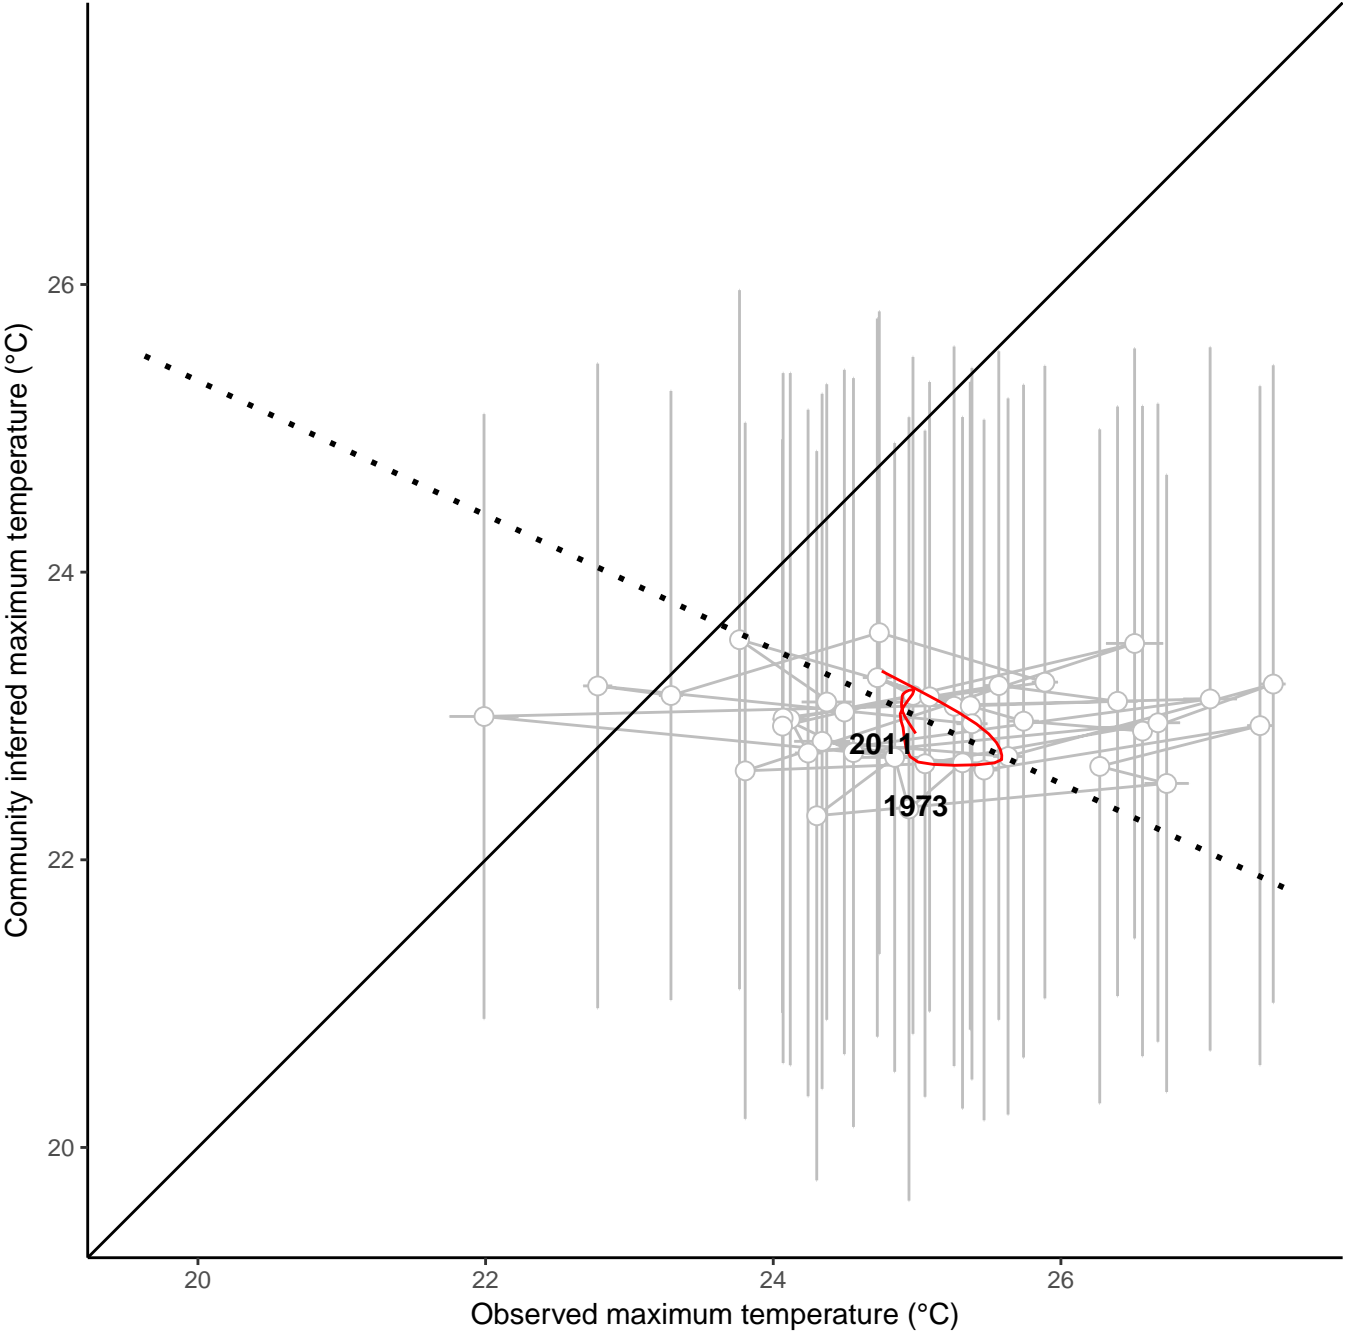

site : 840\_21\_4

absolute deviation = 2.61 | deviation change = 2.39 | maximum state number = 2

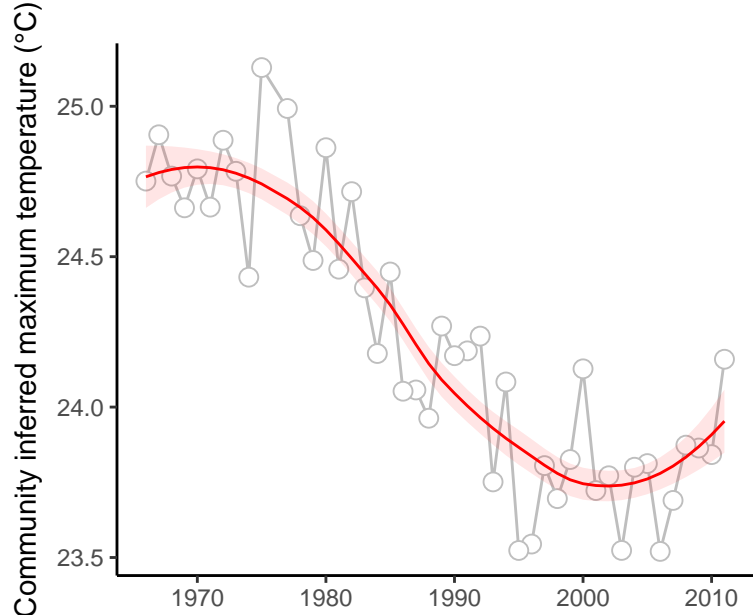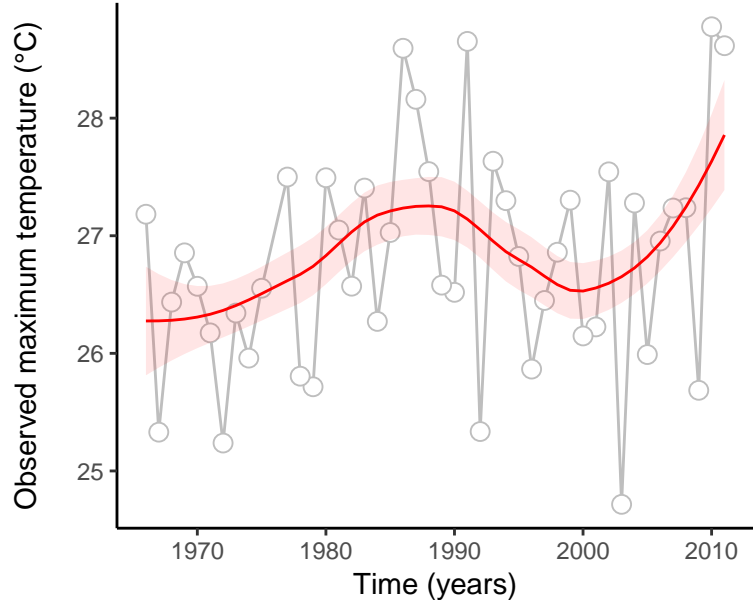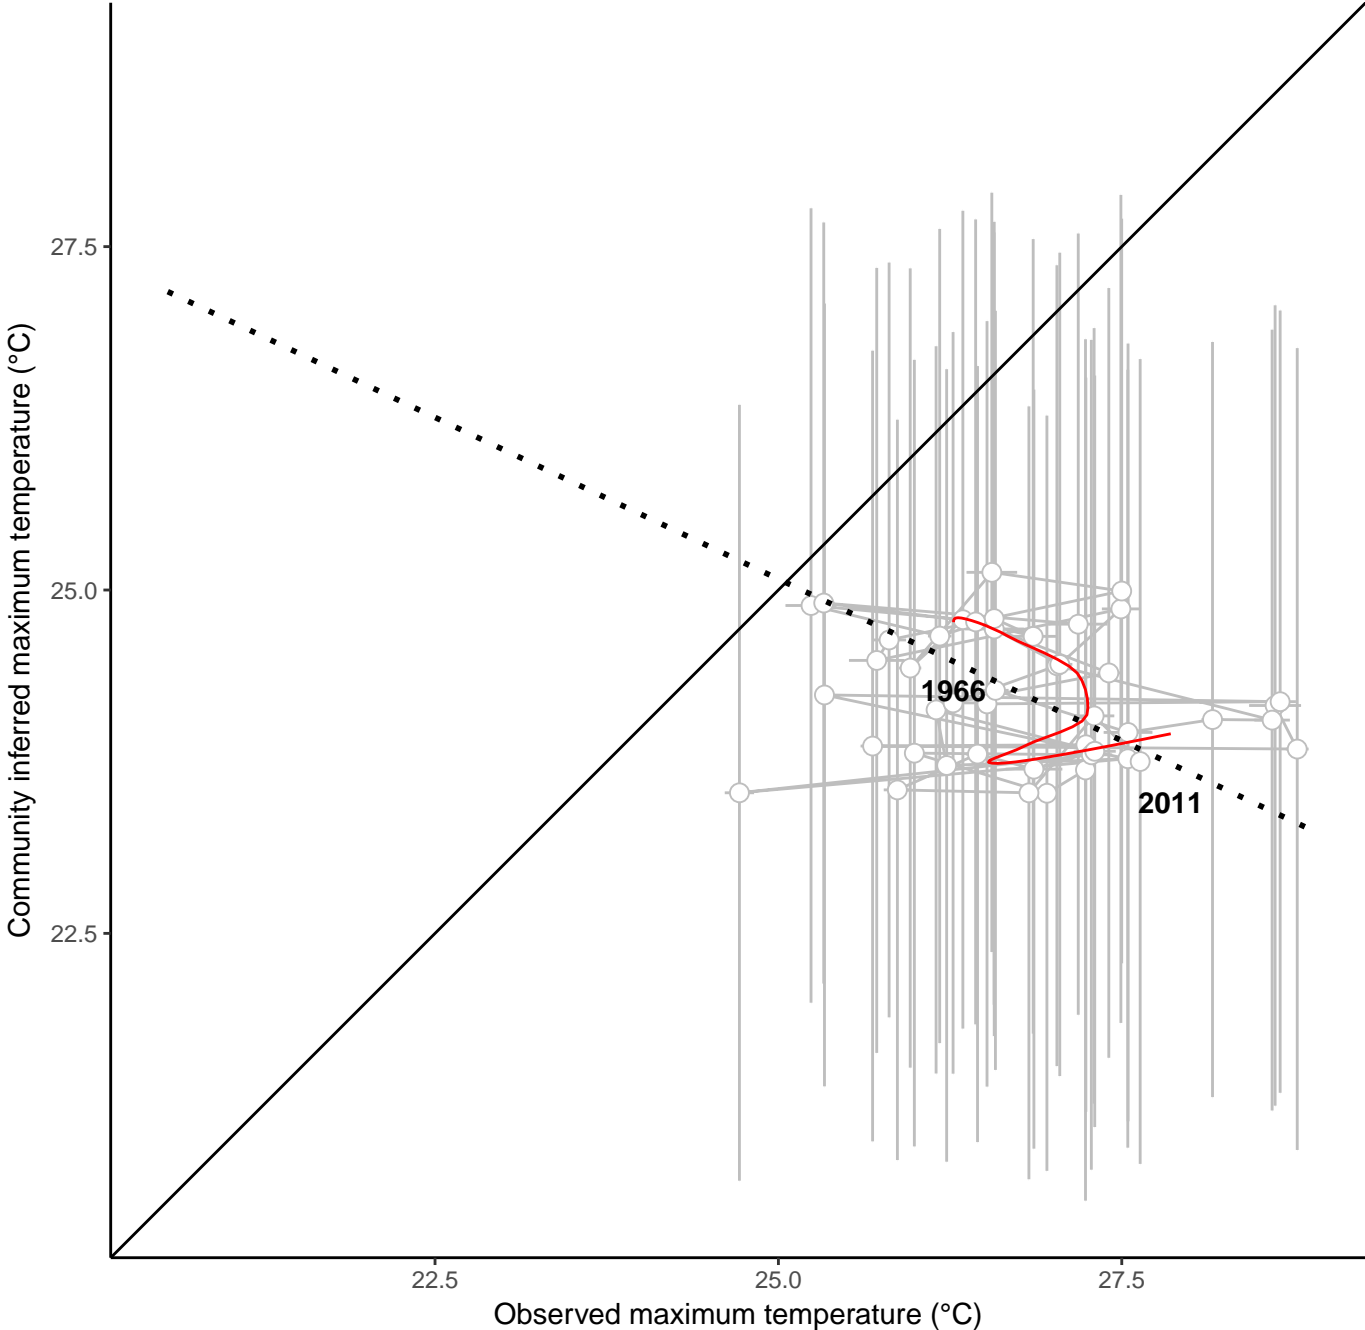

site : 840\_39\_31

absolute deviation = 3.64 | deviation change = 1.56 | maximum state number = 1

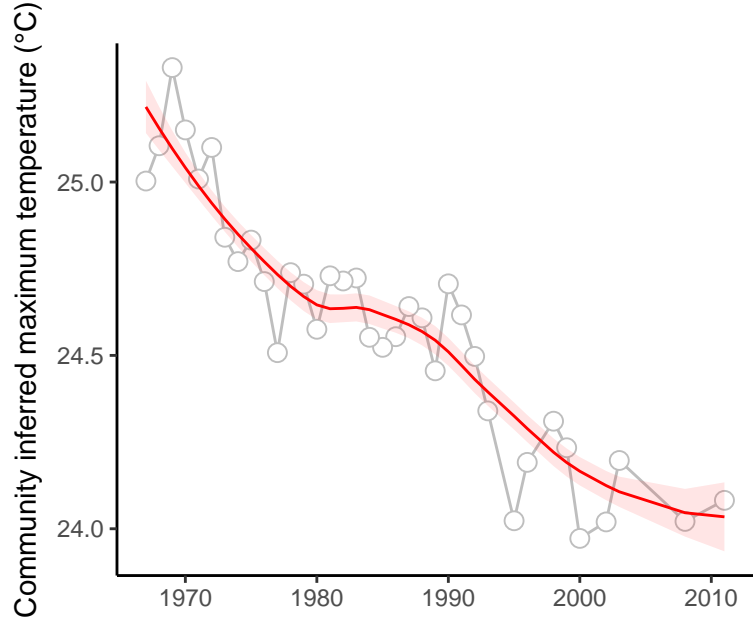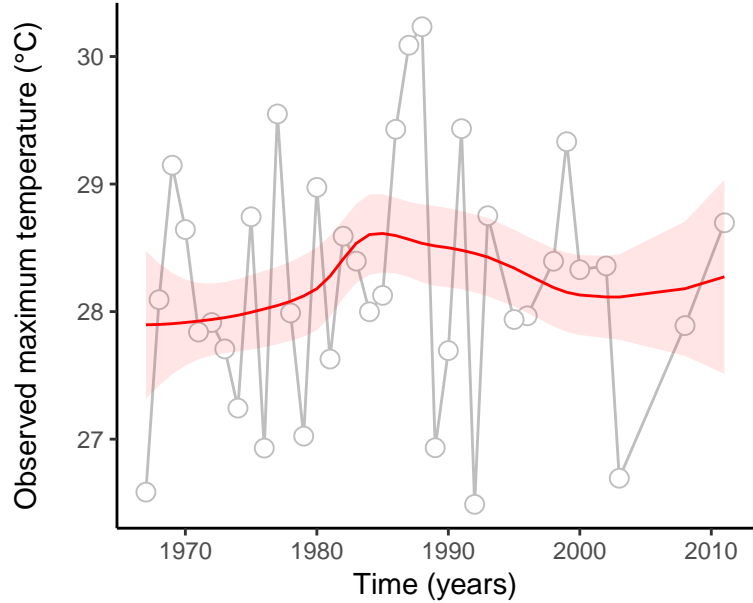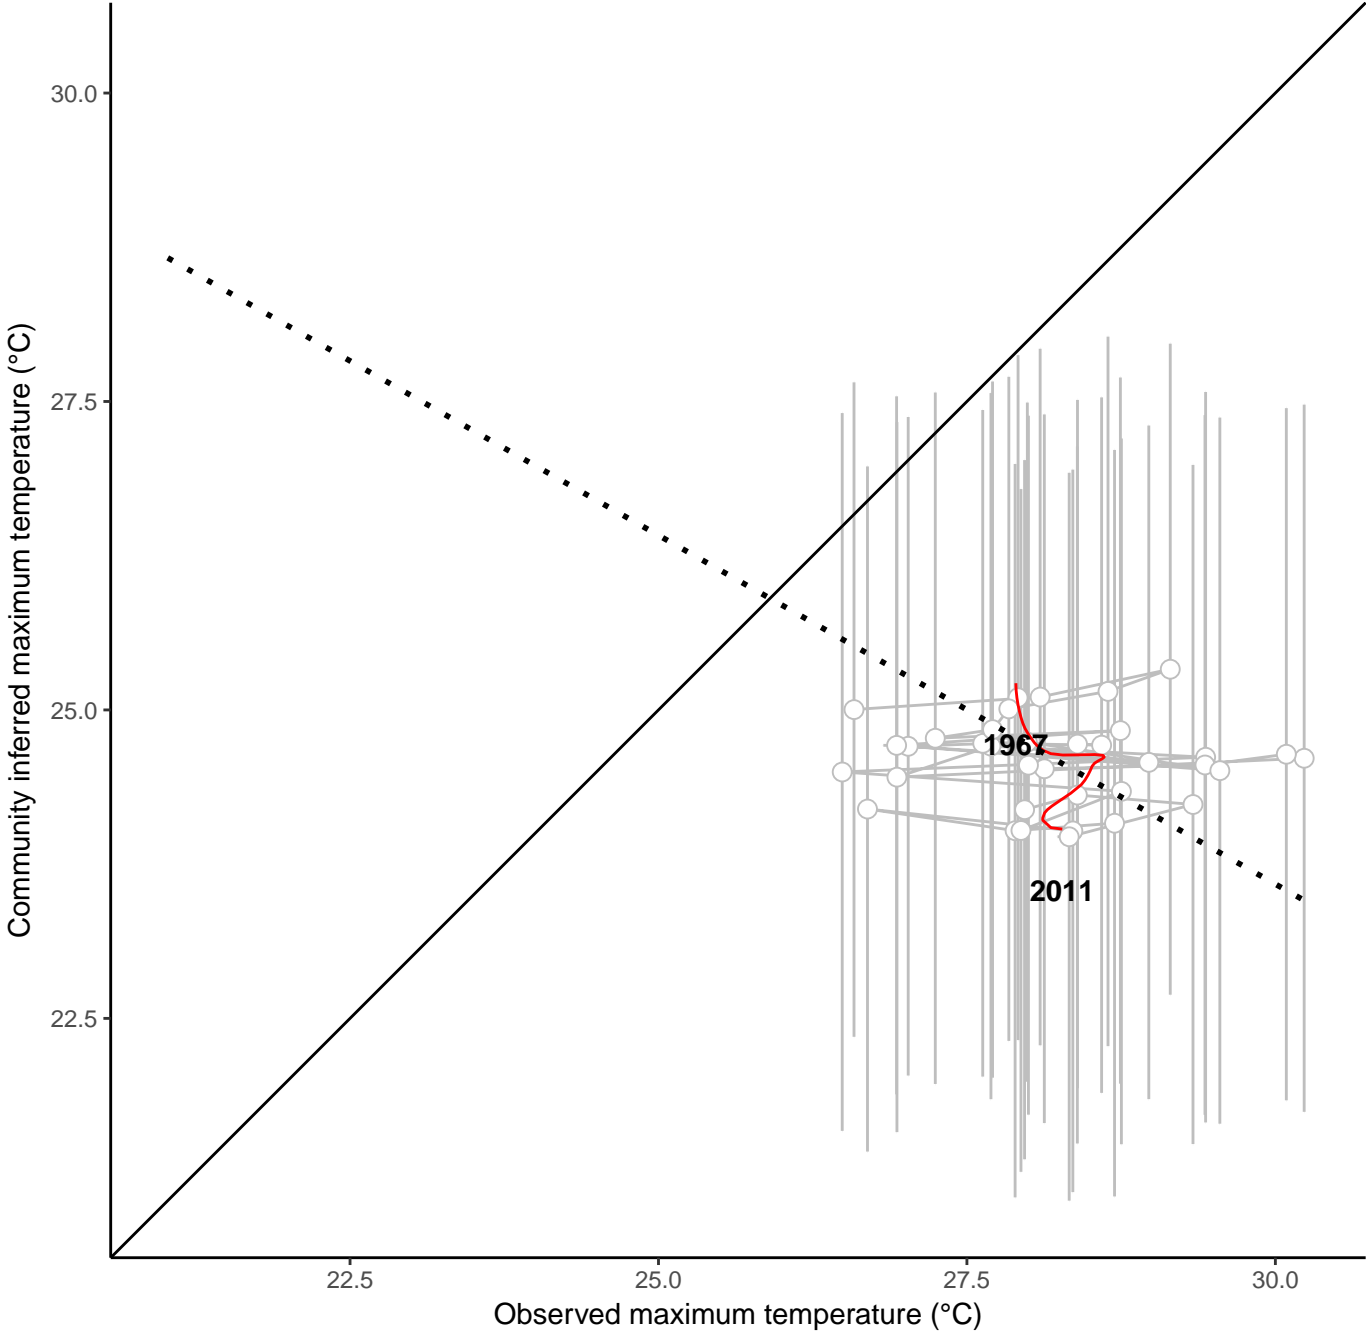

site : 840\_46\_39

absolute deviation = 3.27 | deviation change = 1.92 | maximum state number = 2

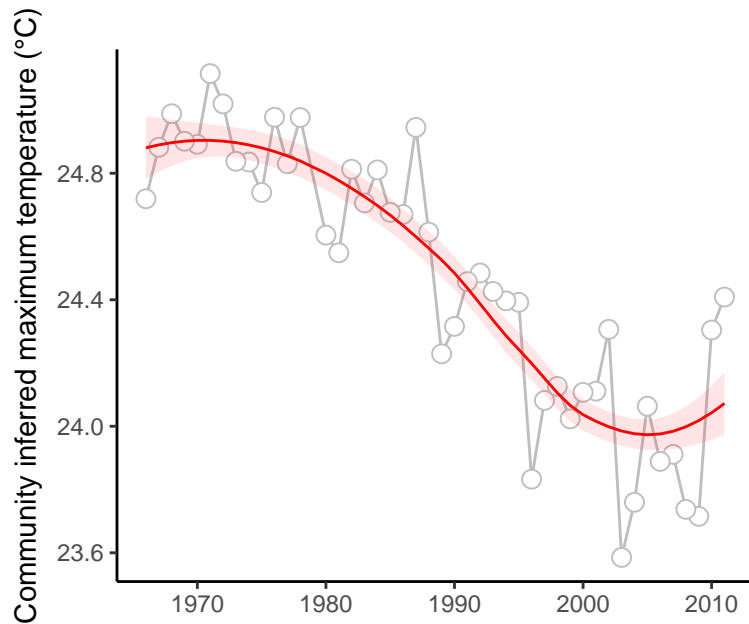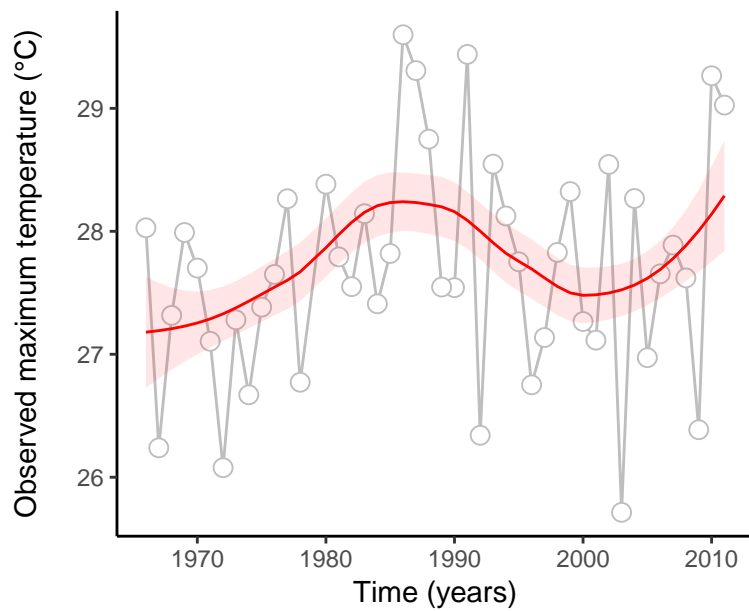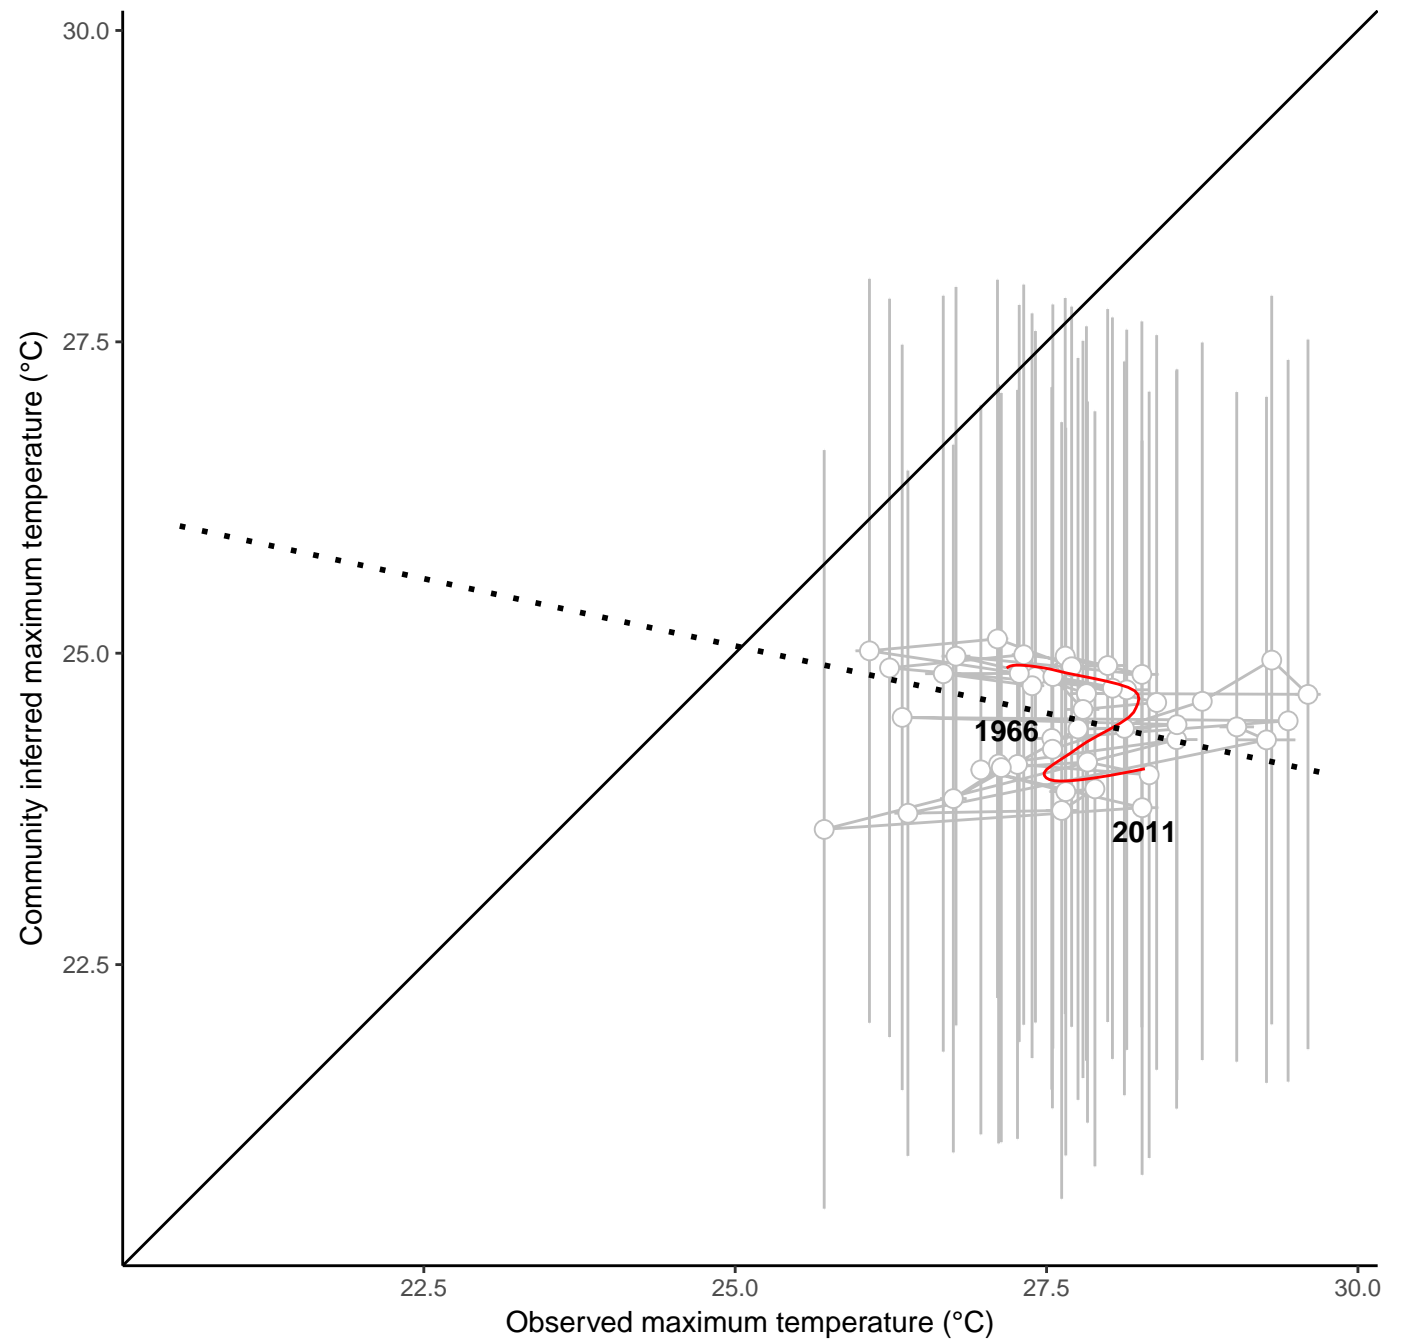

site : 840\_90\_37

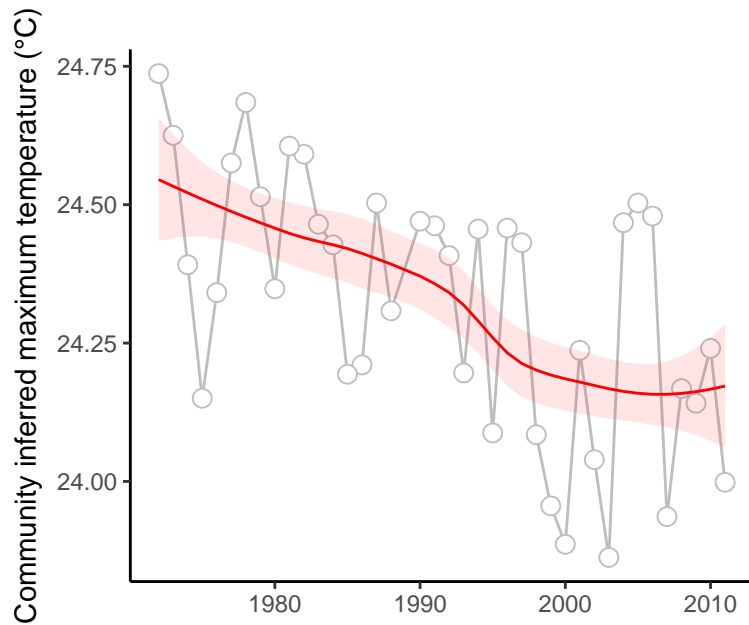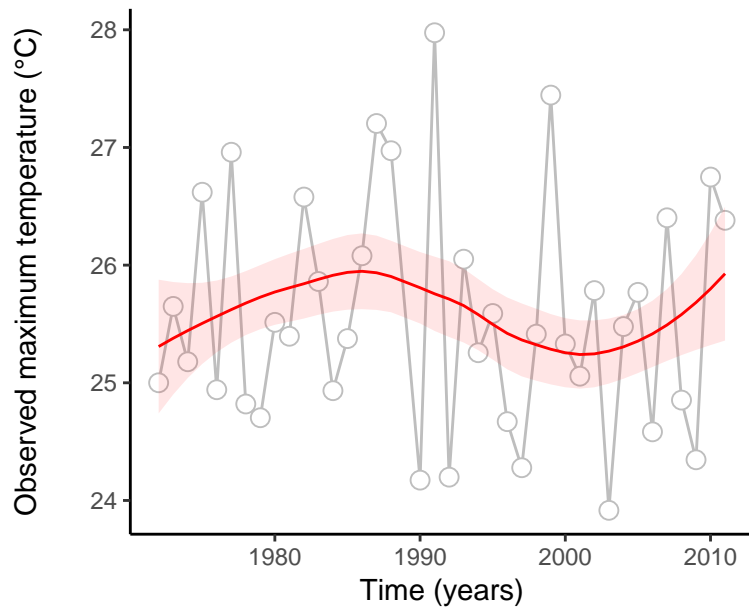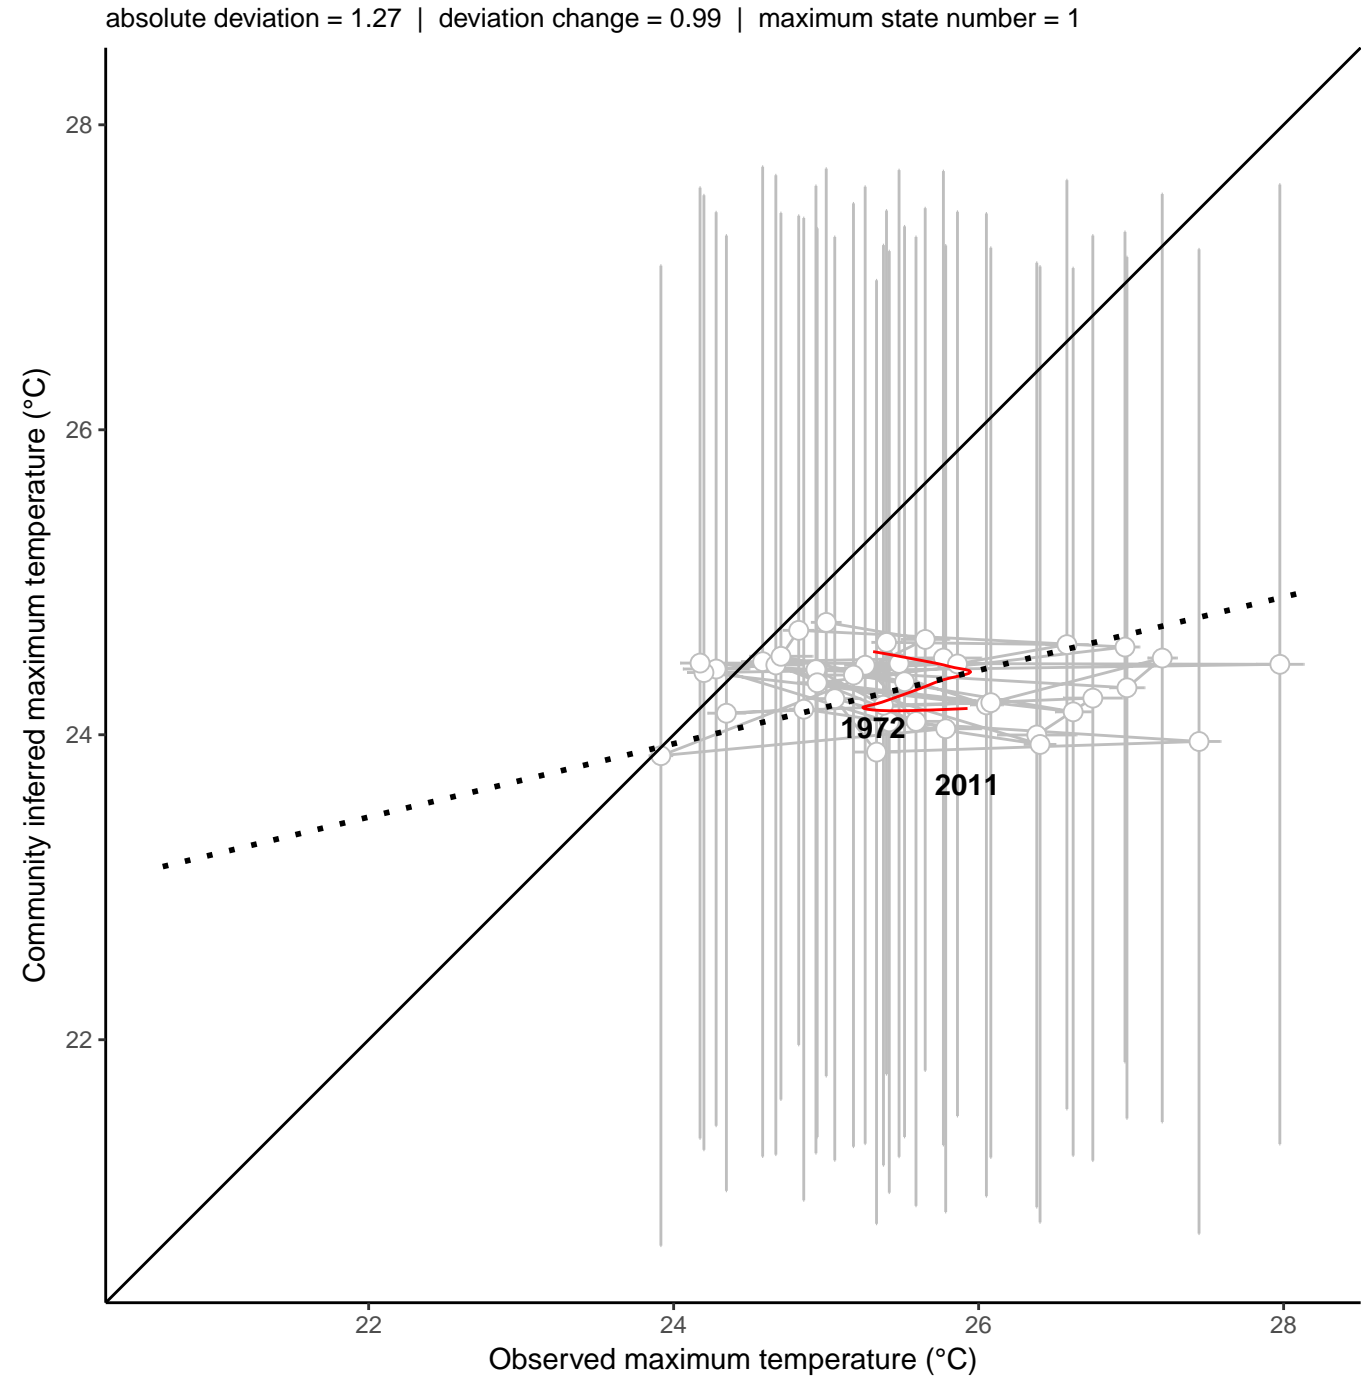

site : 840\_90\_38

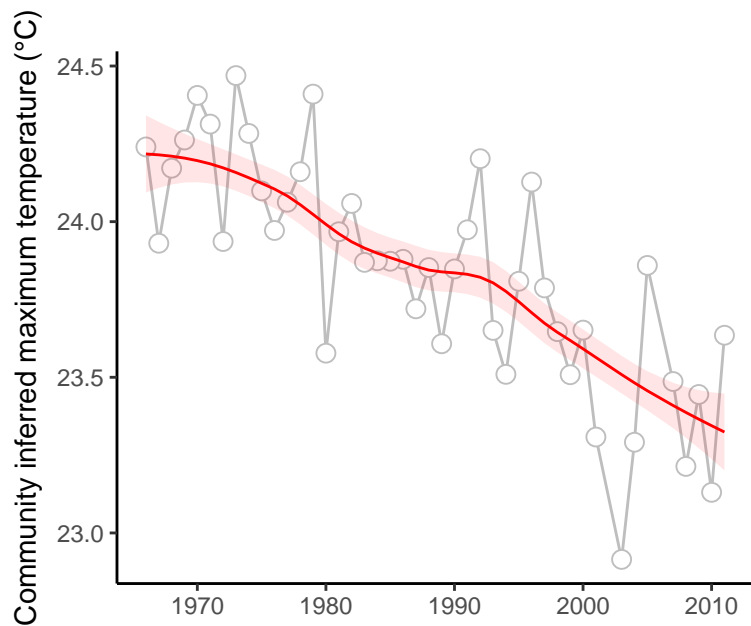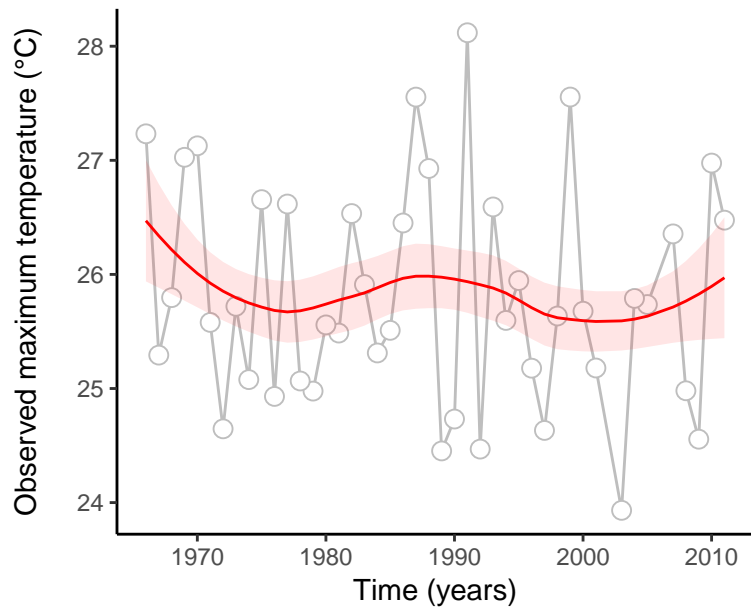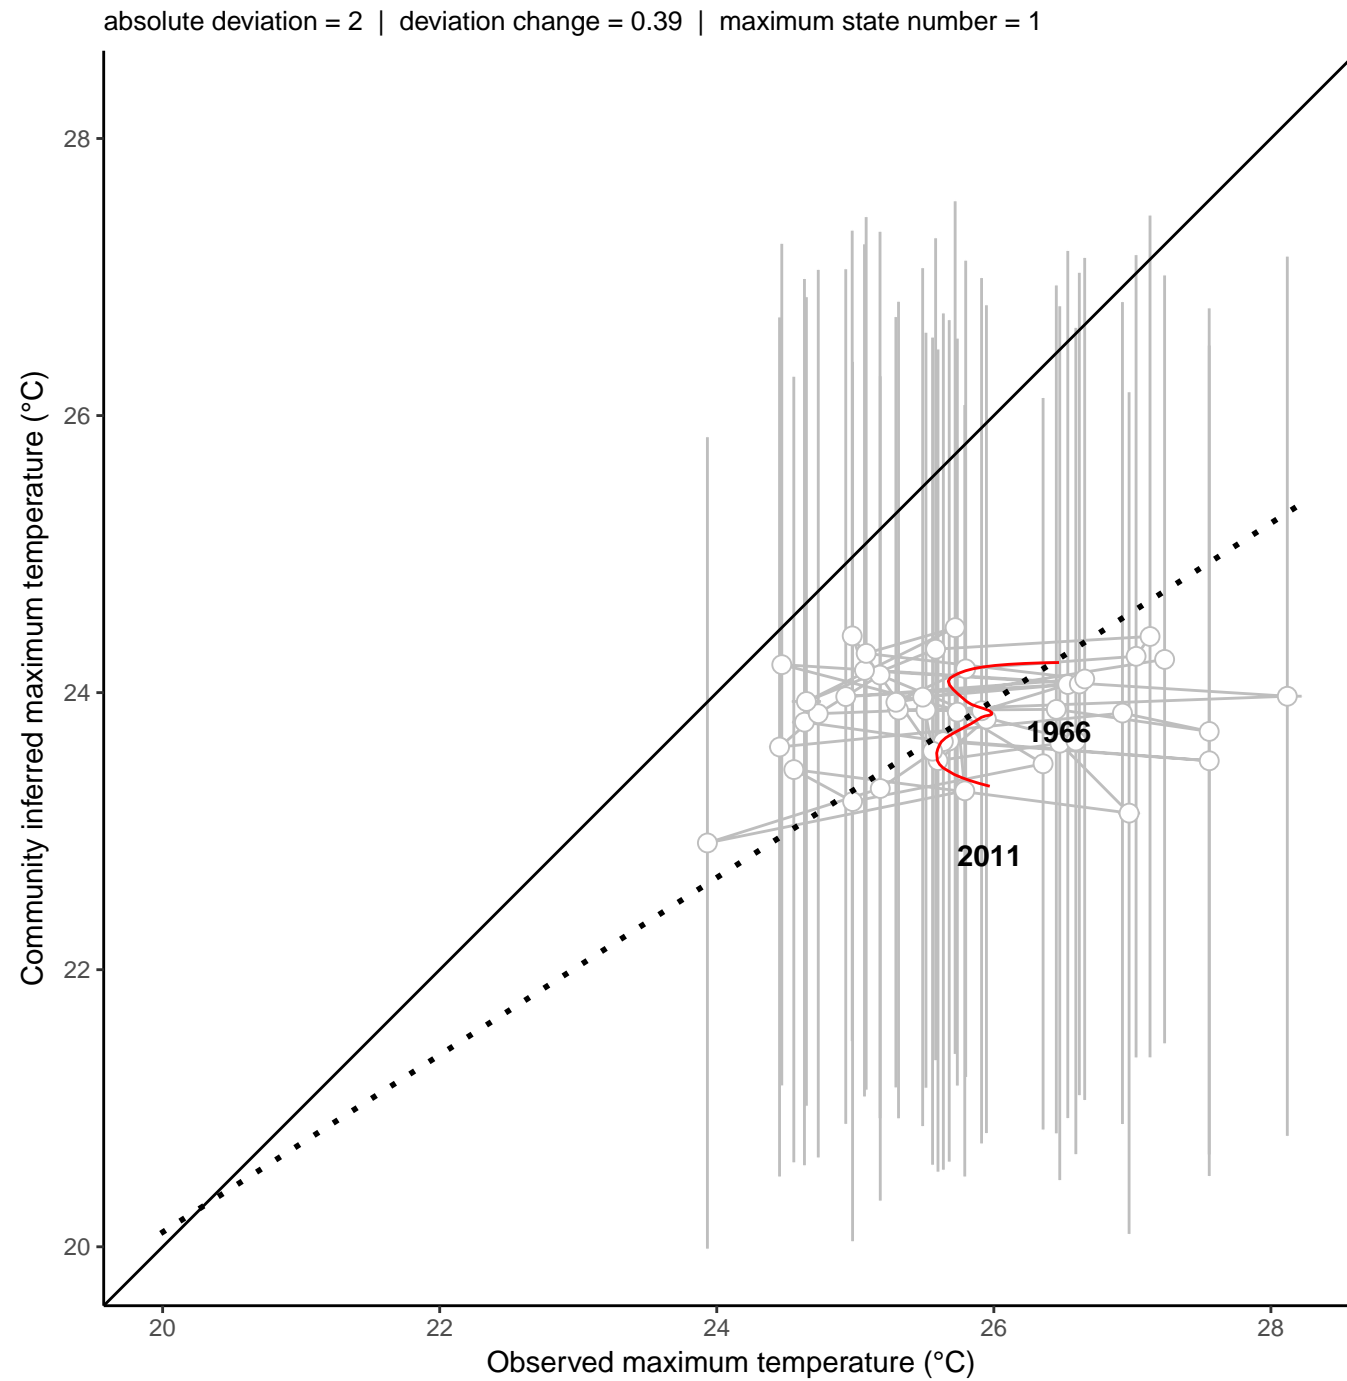



site : 840\_91\_17

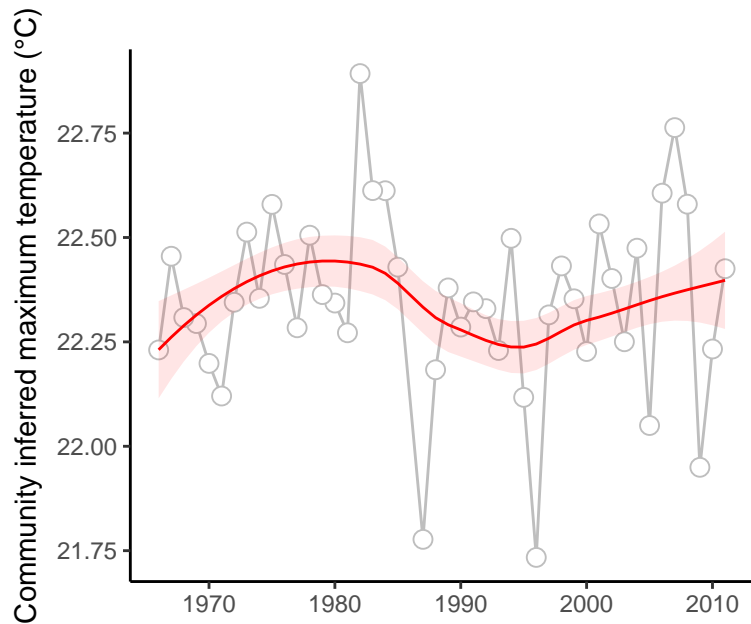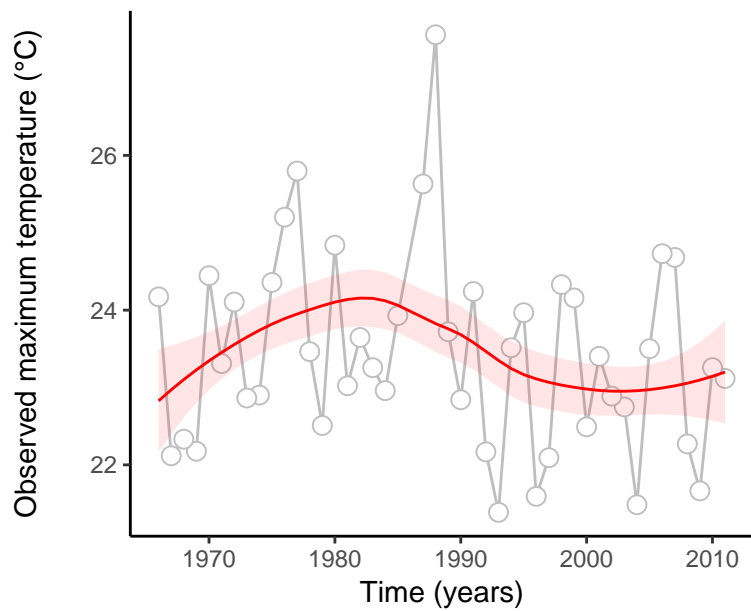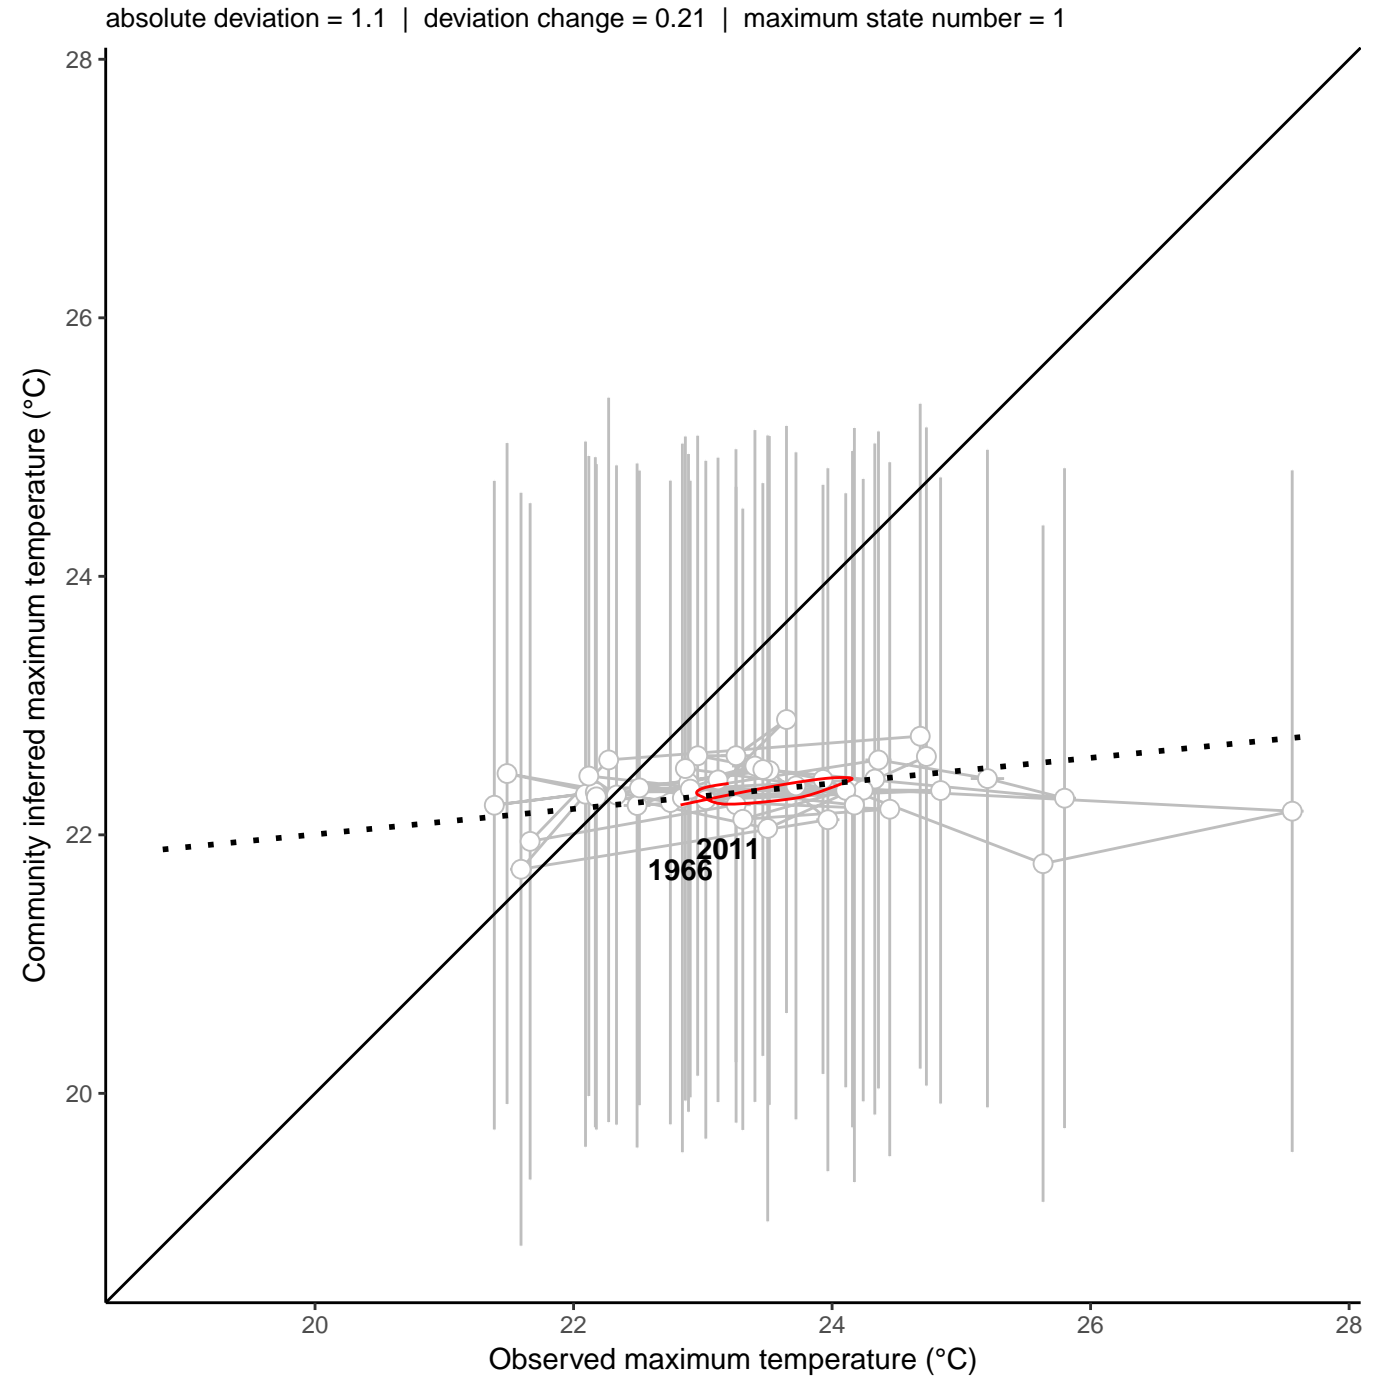

site : 840\_91\_38

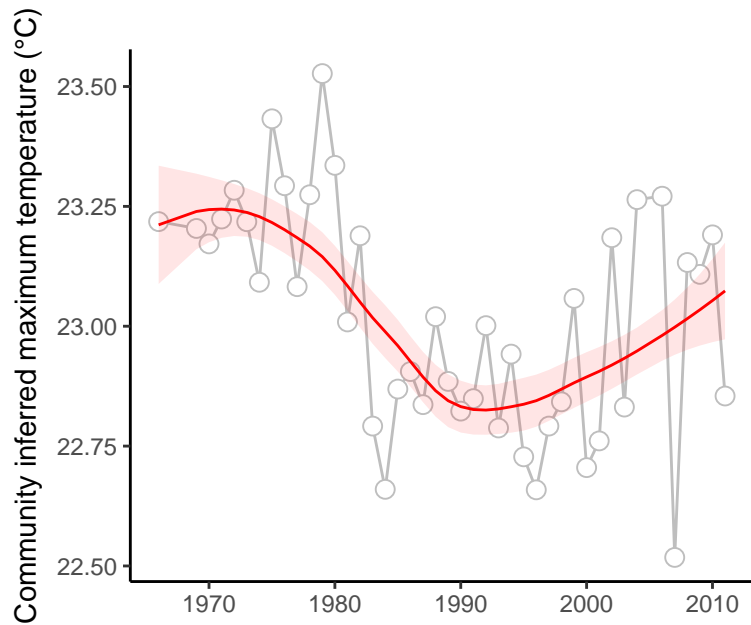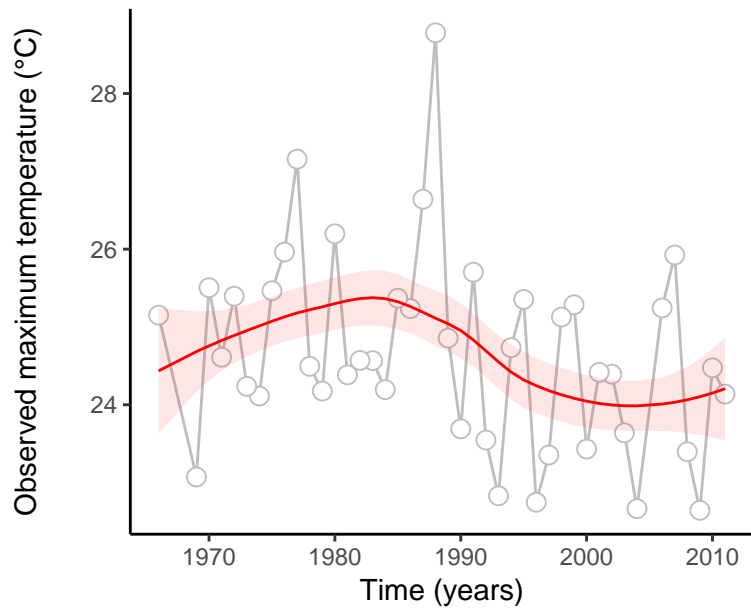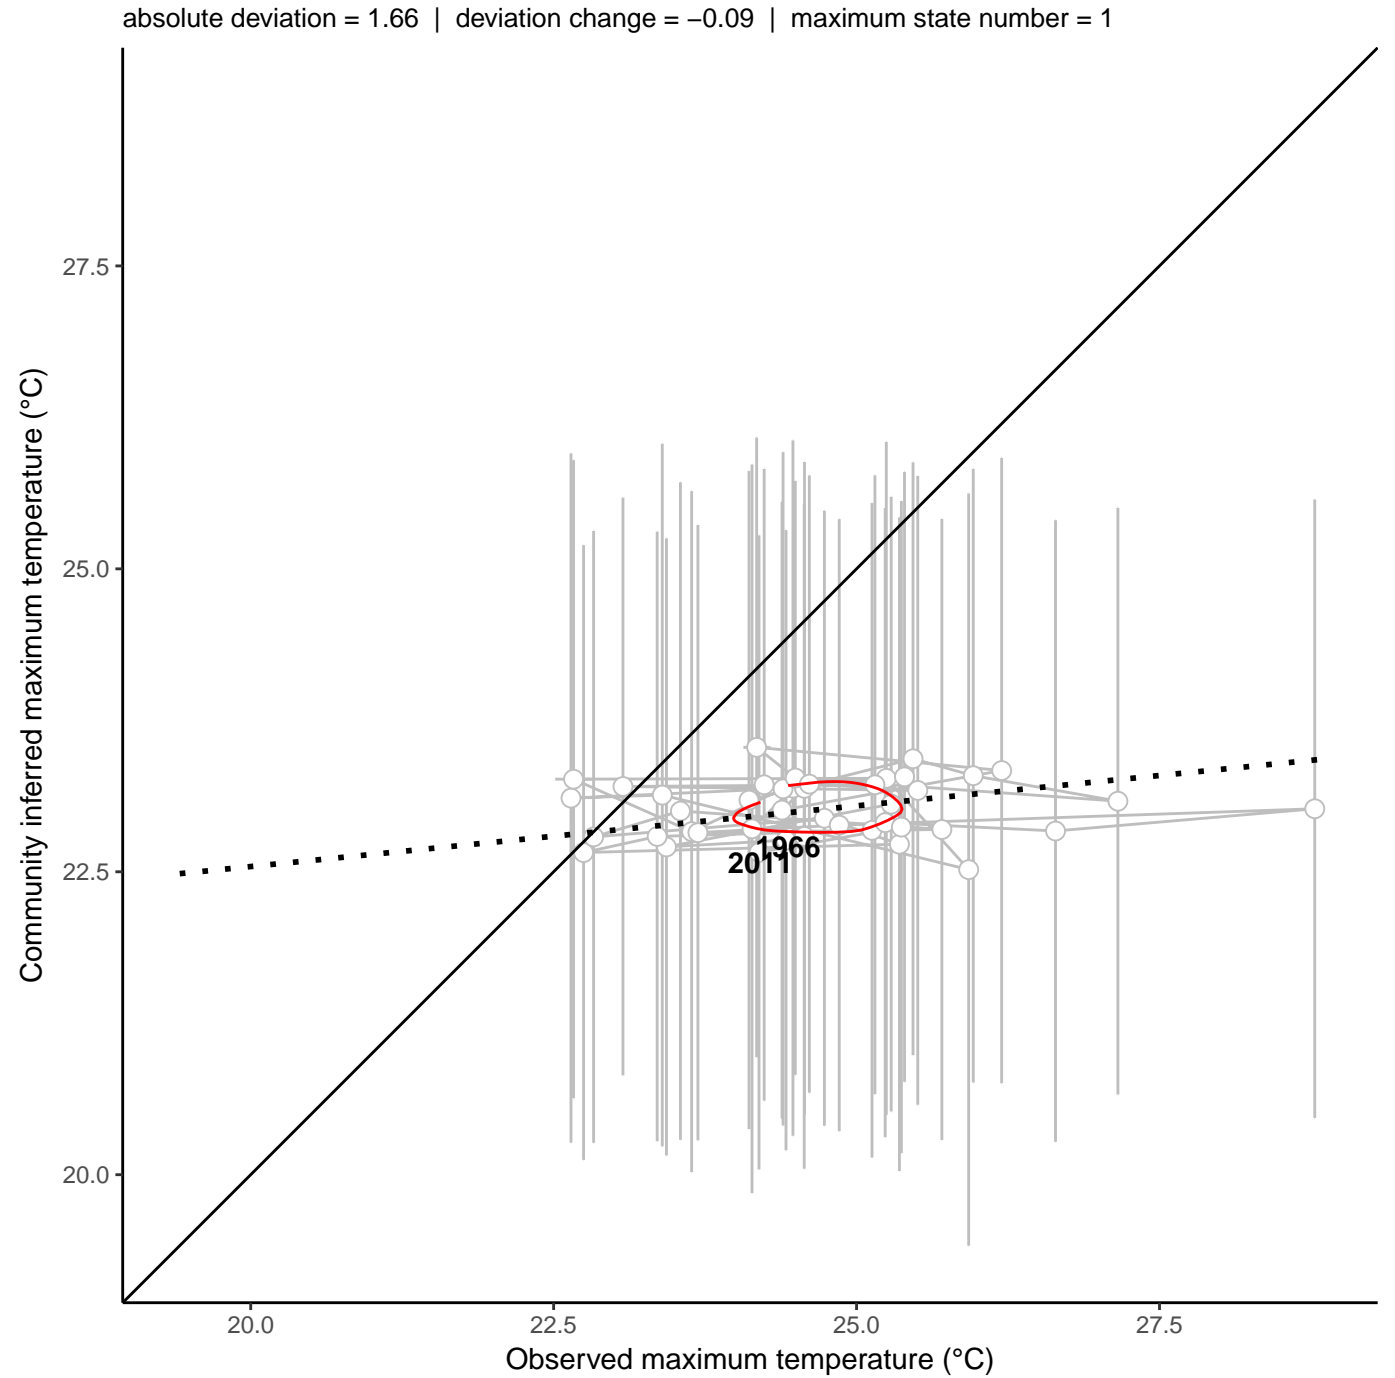

site : 840\_61\_36

absolute deviation = 0.37 | deviation change = 0.53 | maximum state number = 1

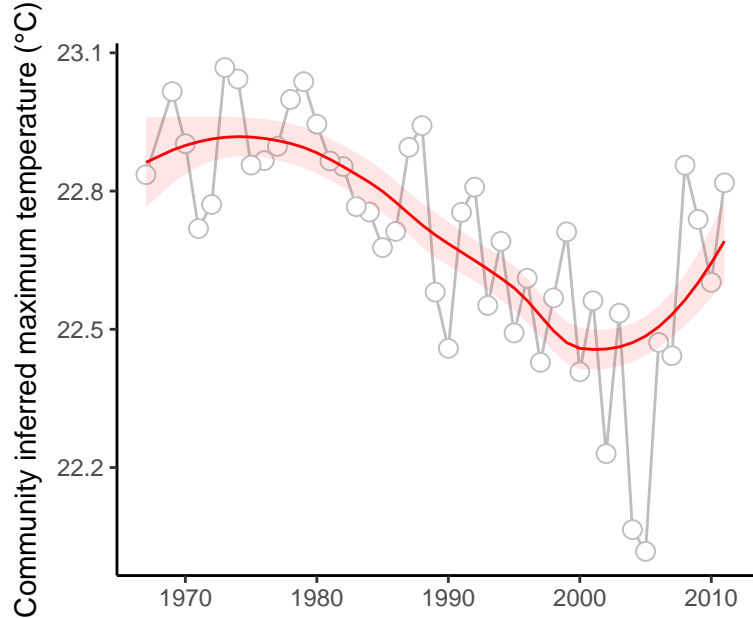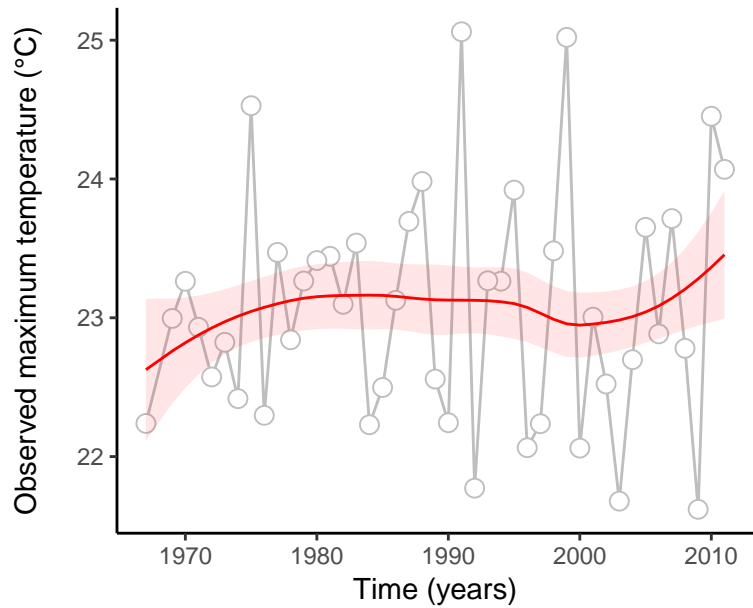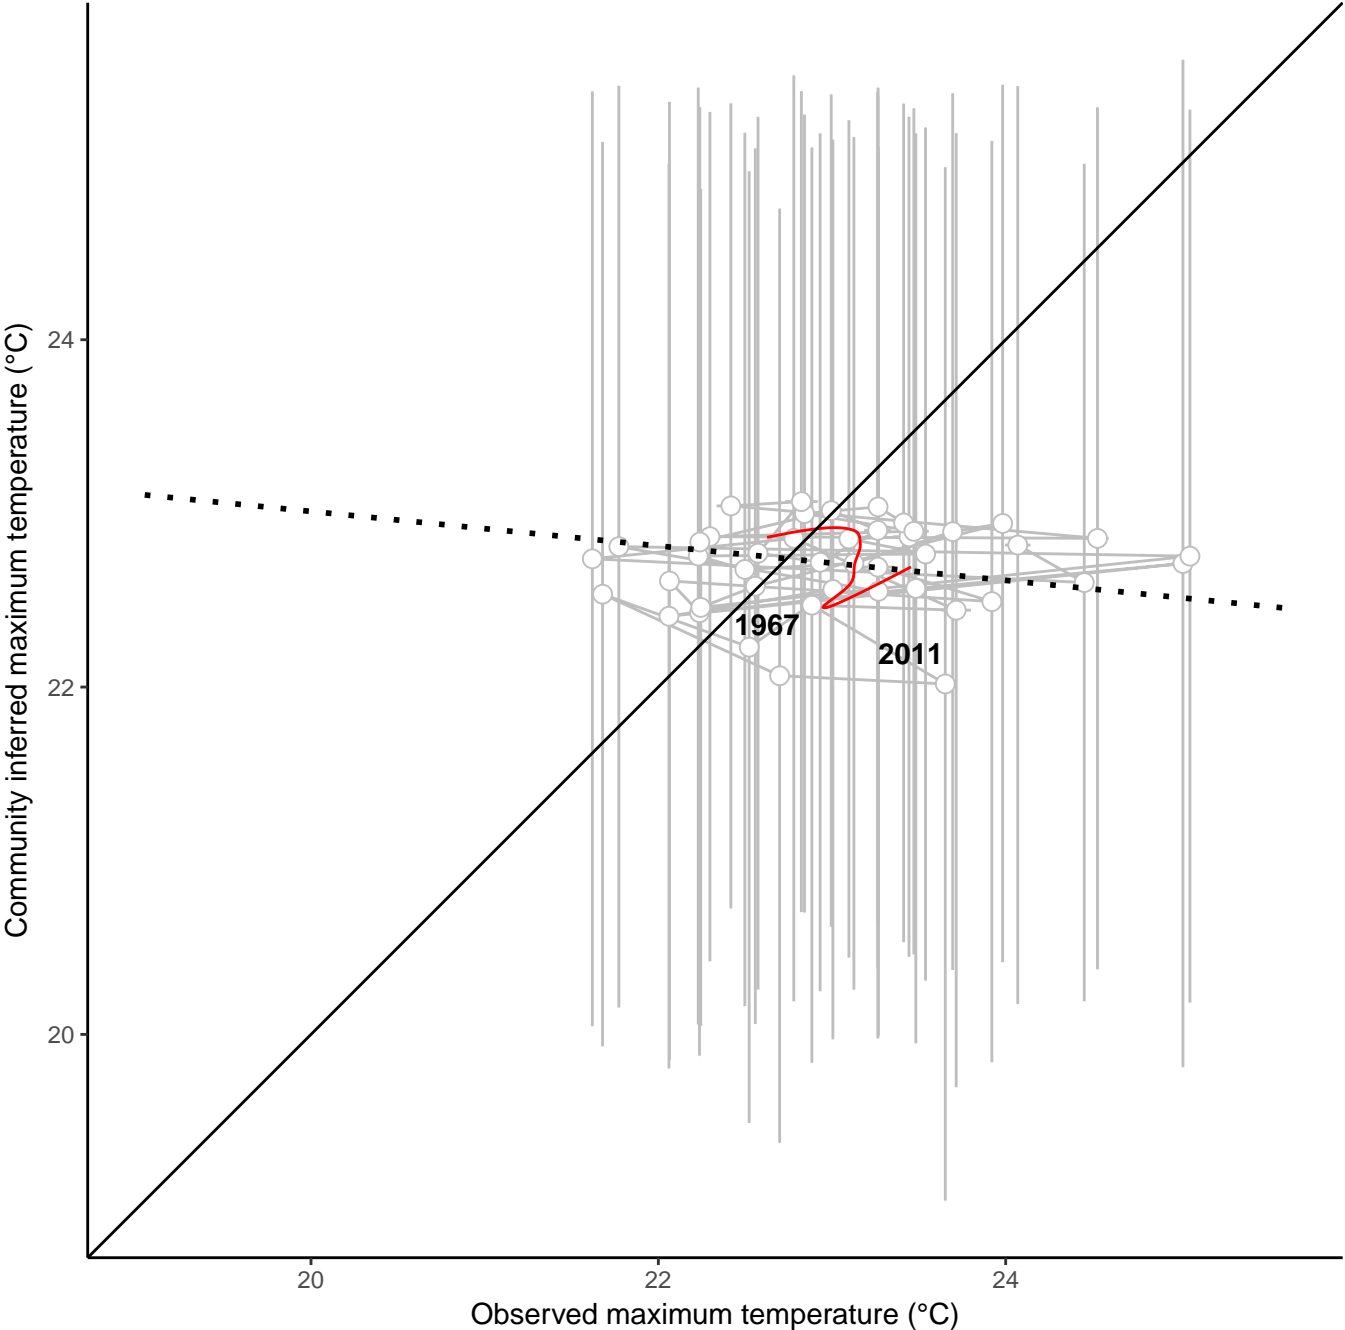

site : 840\_69\_2

absolute deviation = 0.12 | deviation change = 0.04 | maximum state number = 1

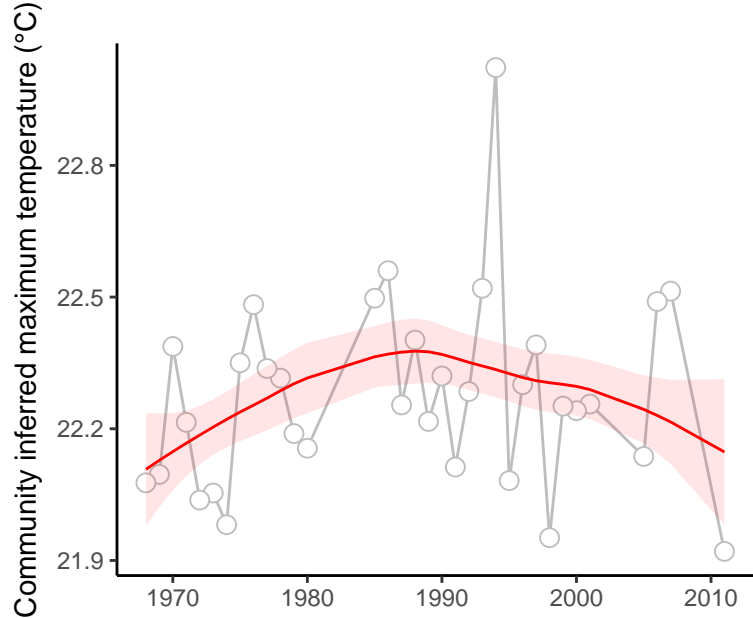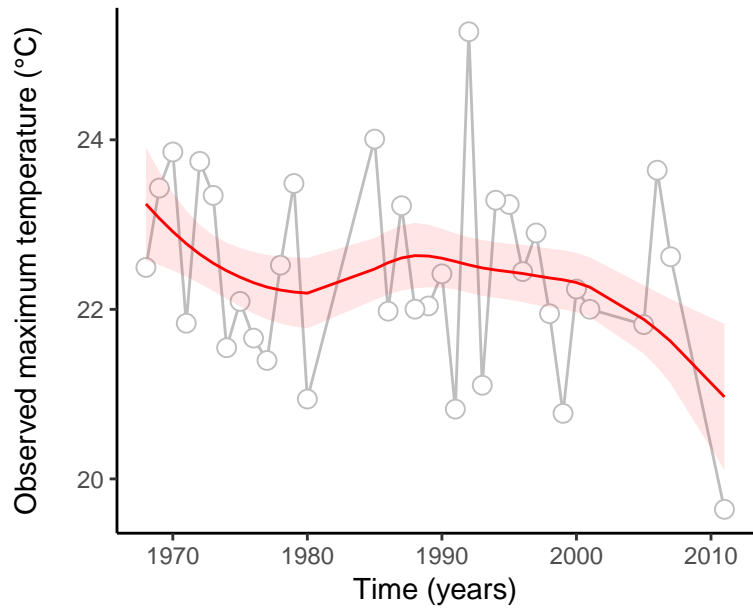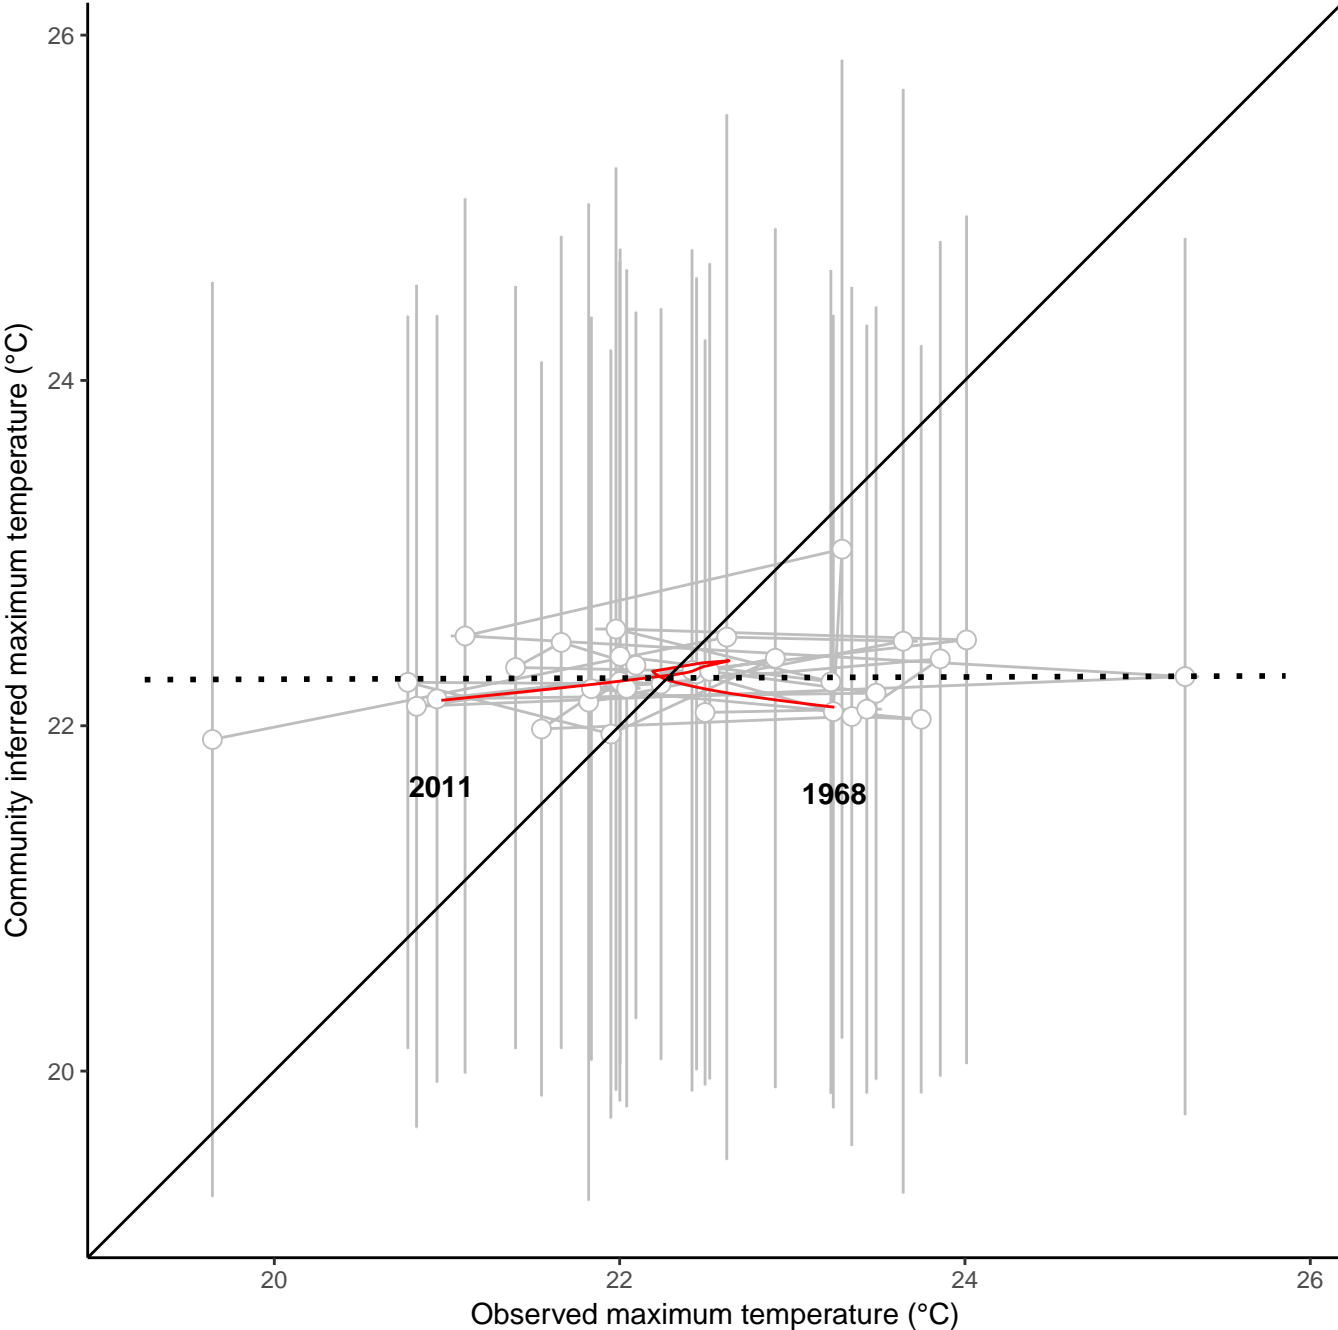

site : 840\_72\_41

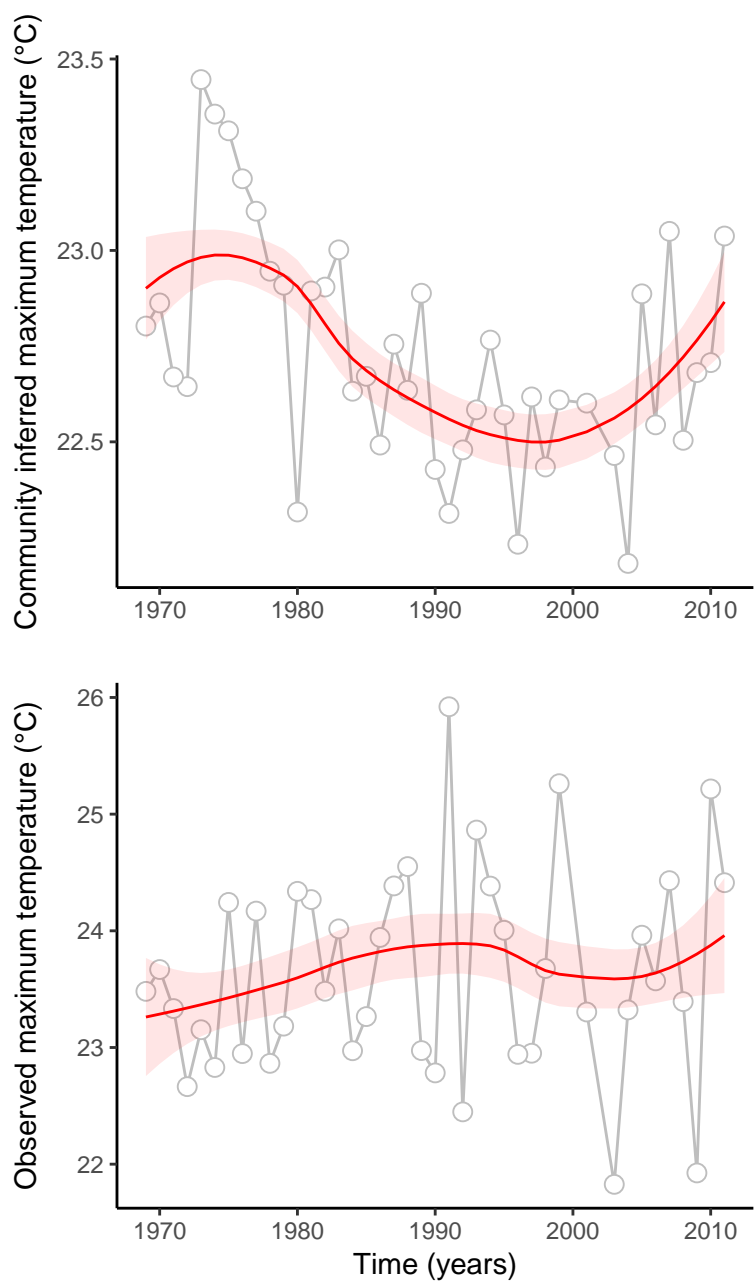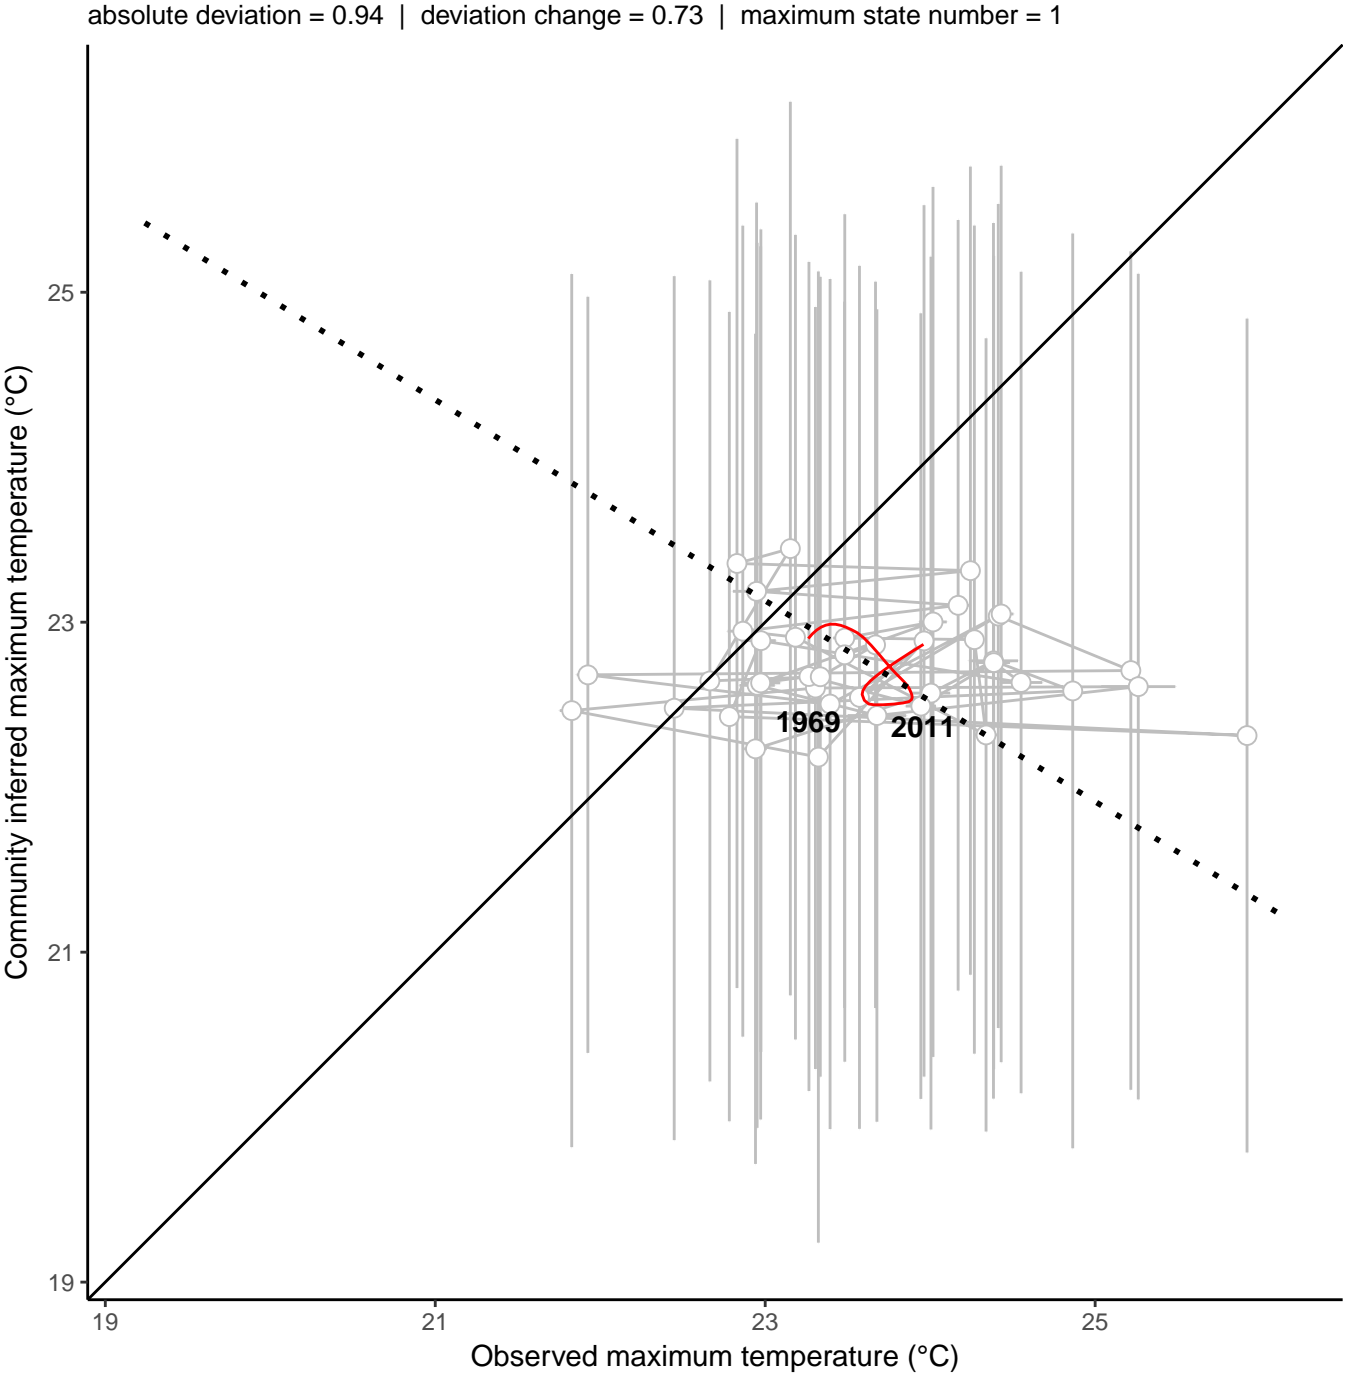

site : 840\_82\_18

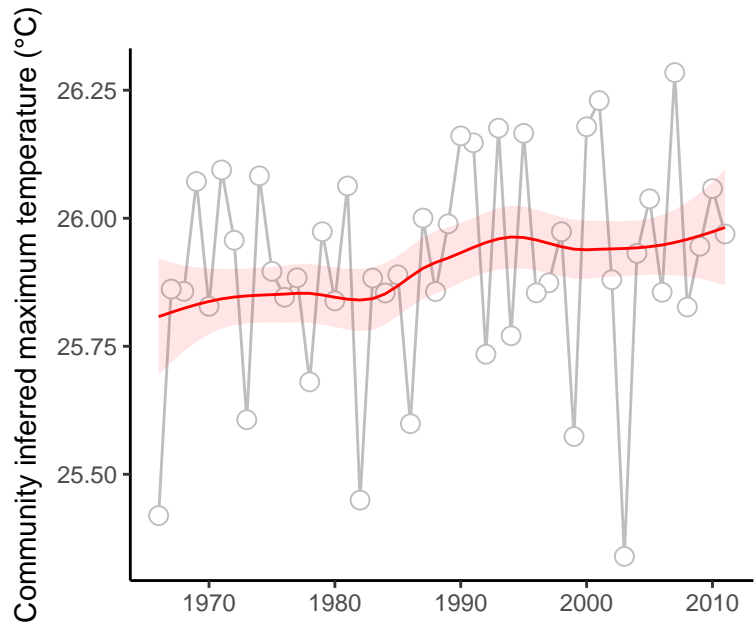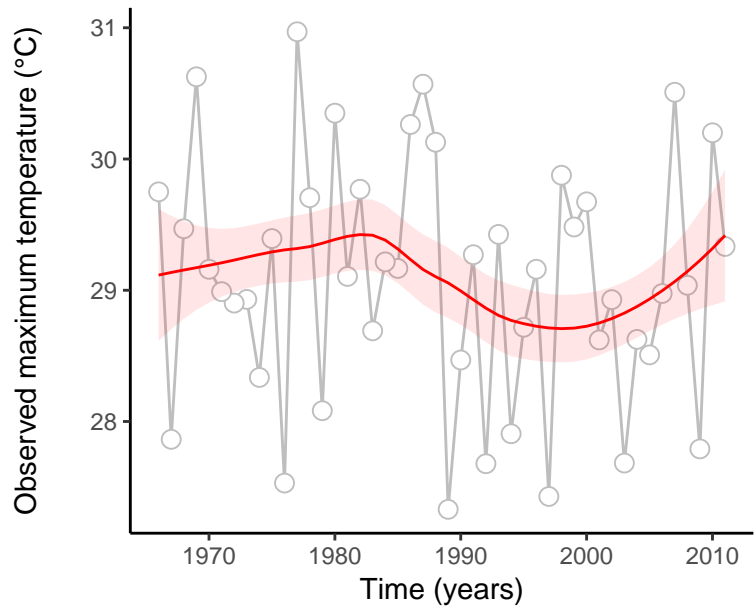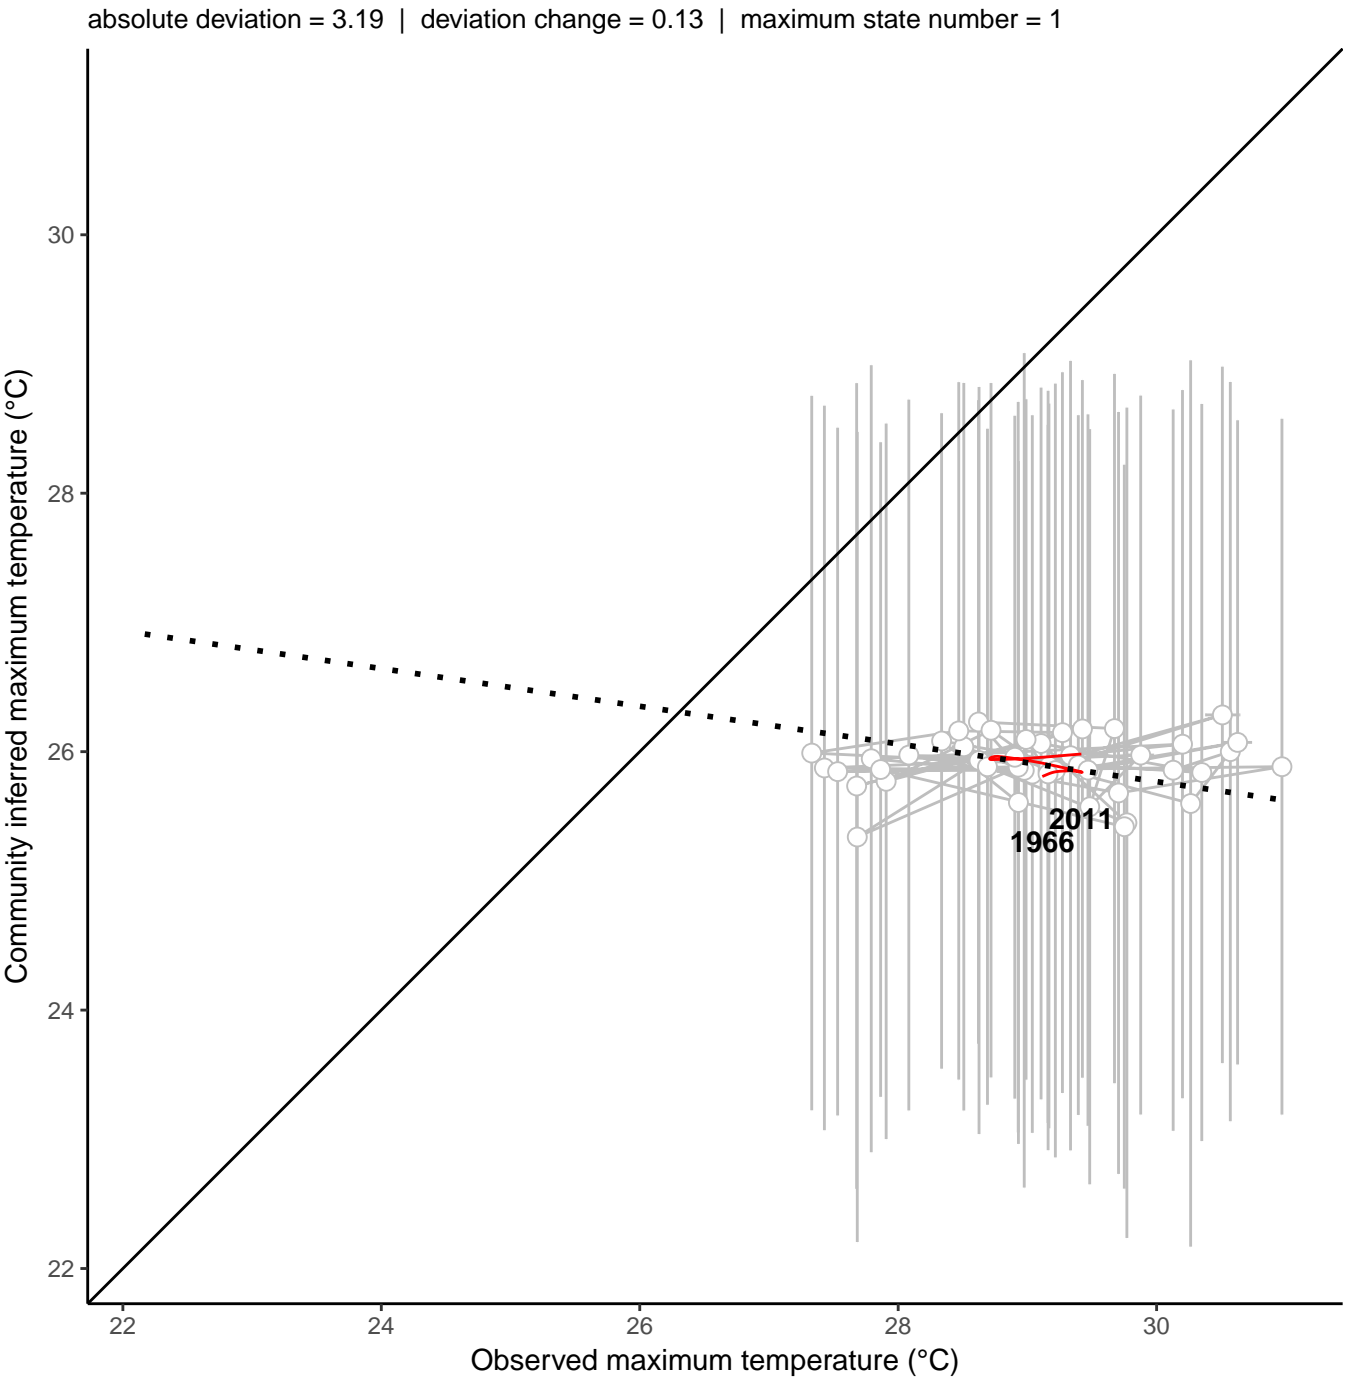

site : 840\_83\_58

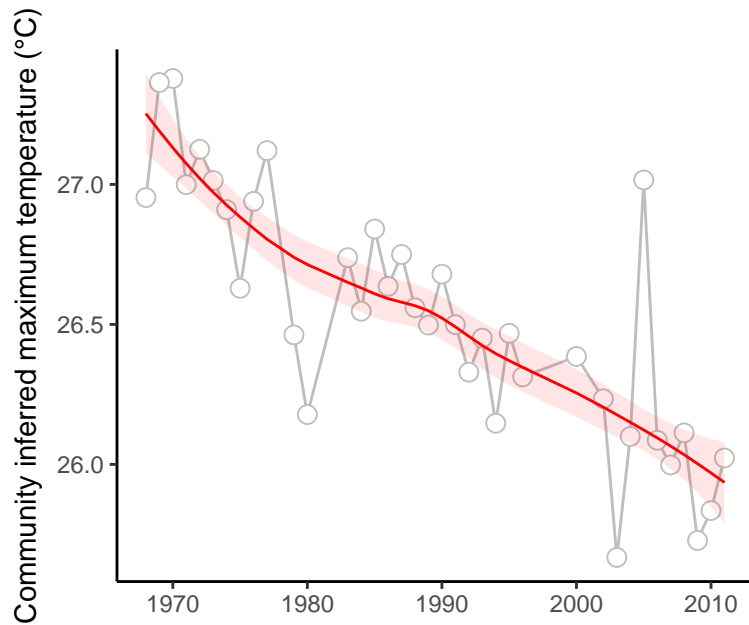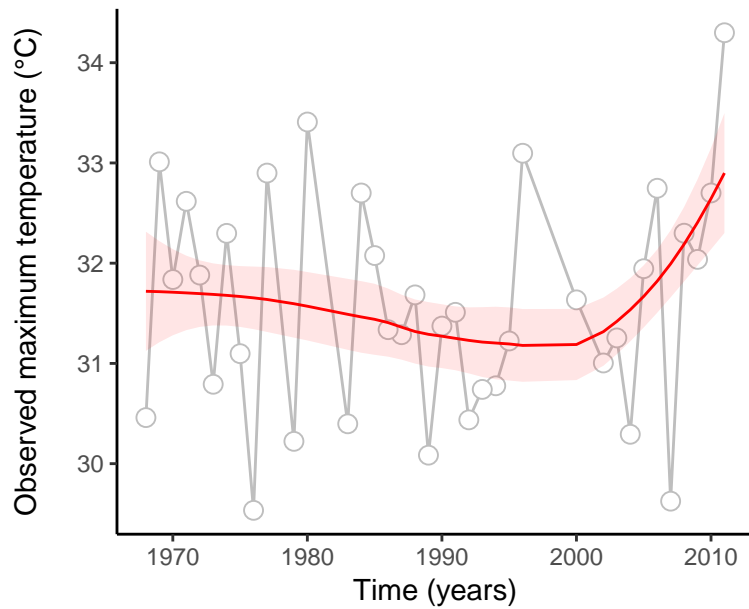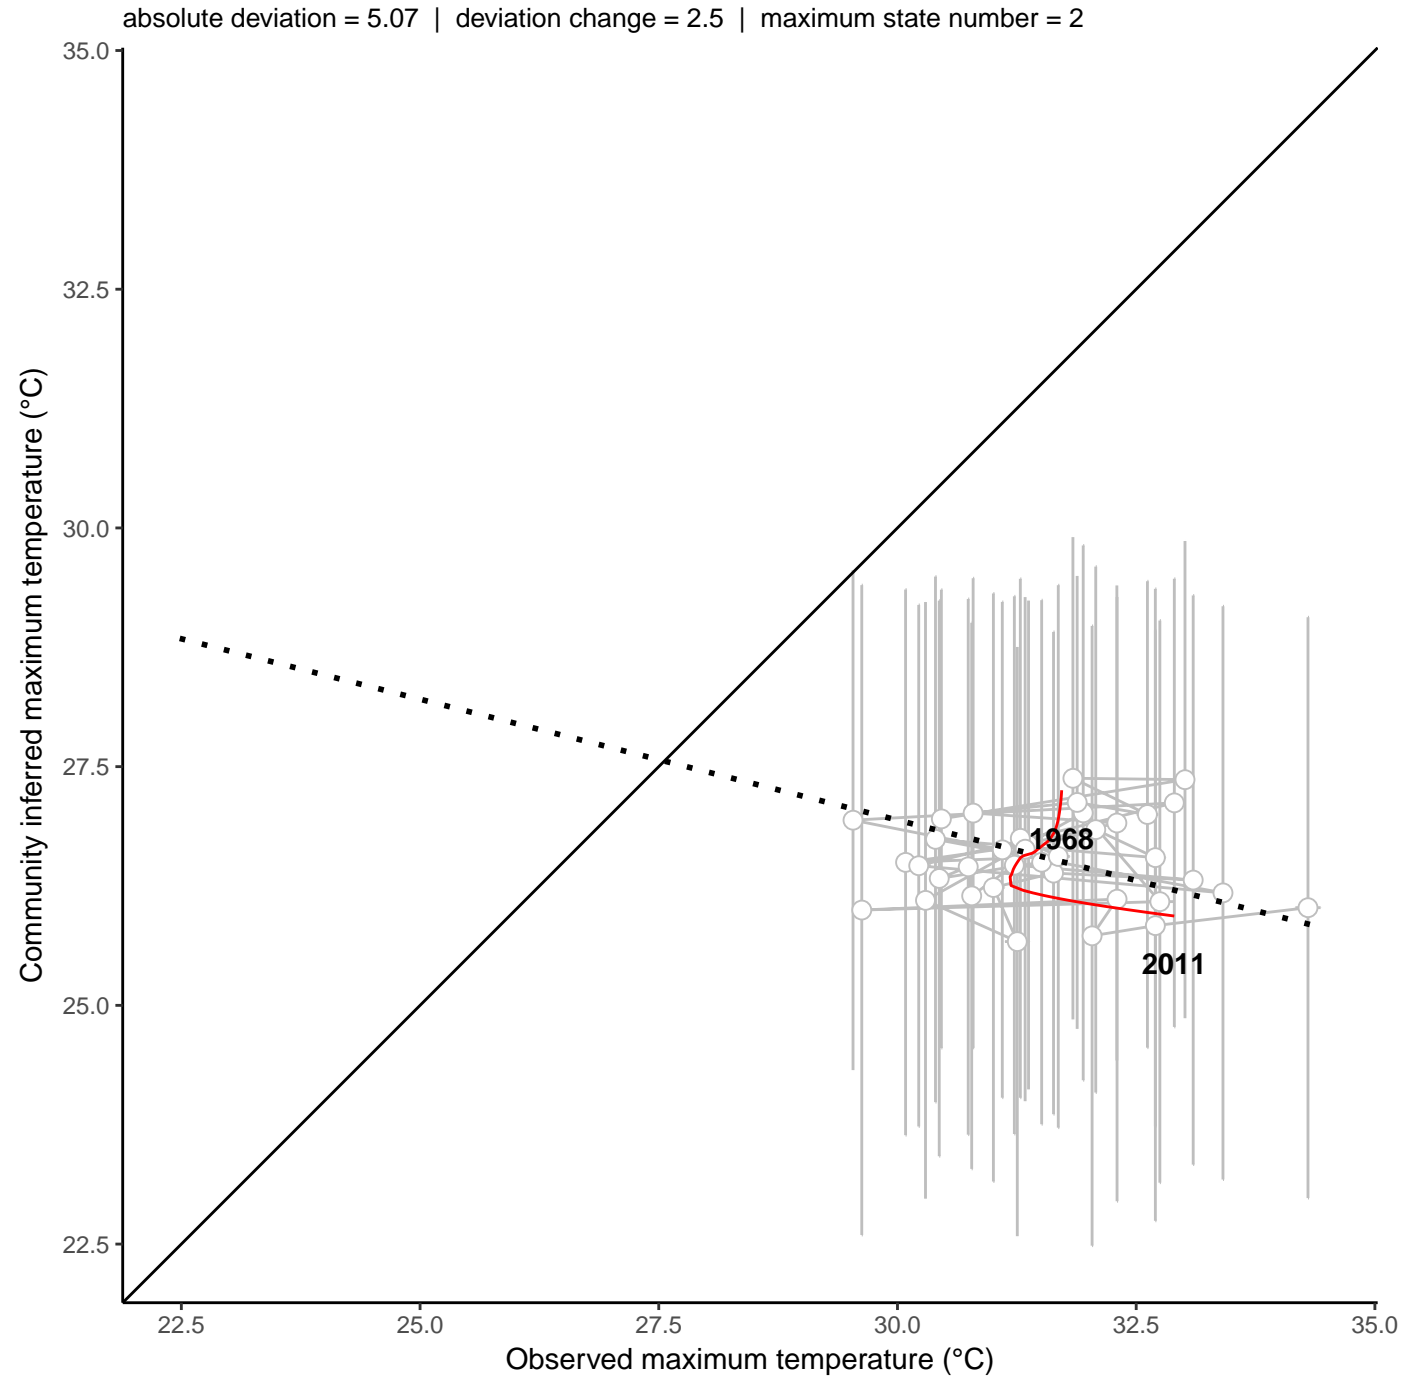

site : 840\_89\_17

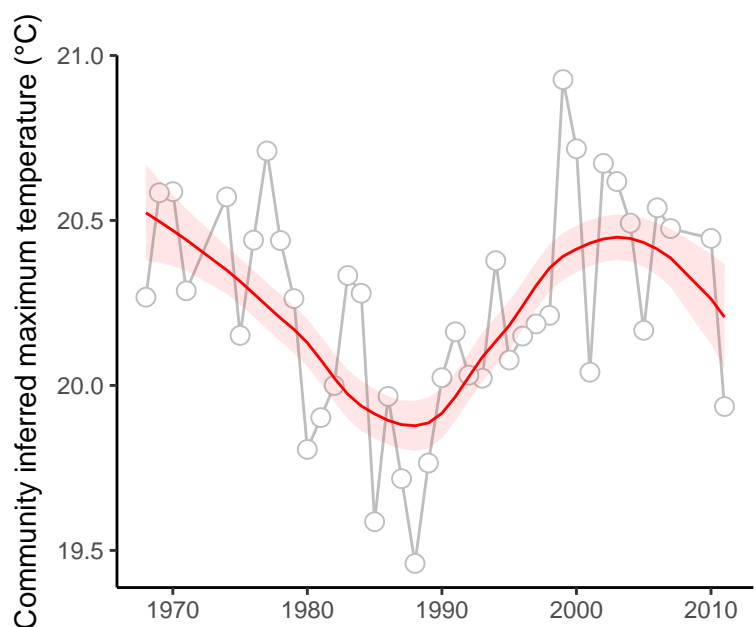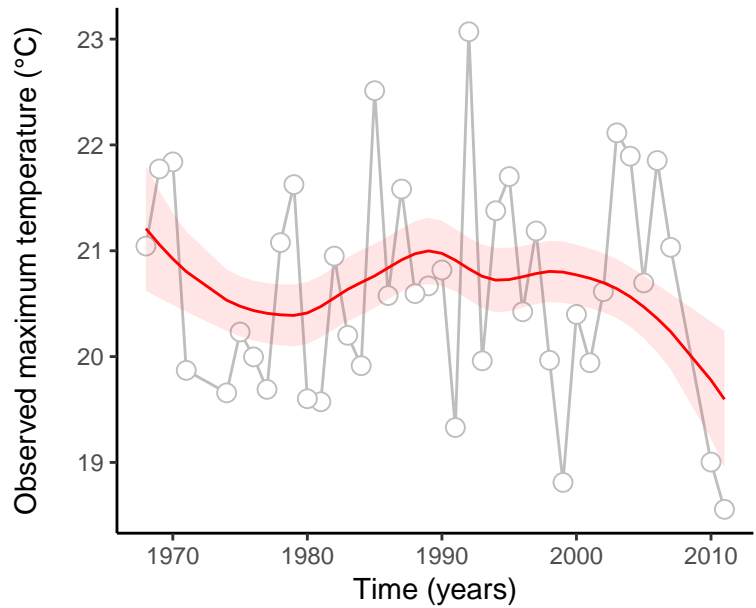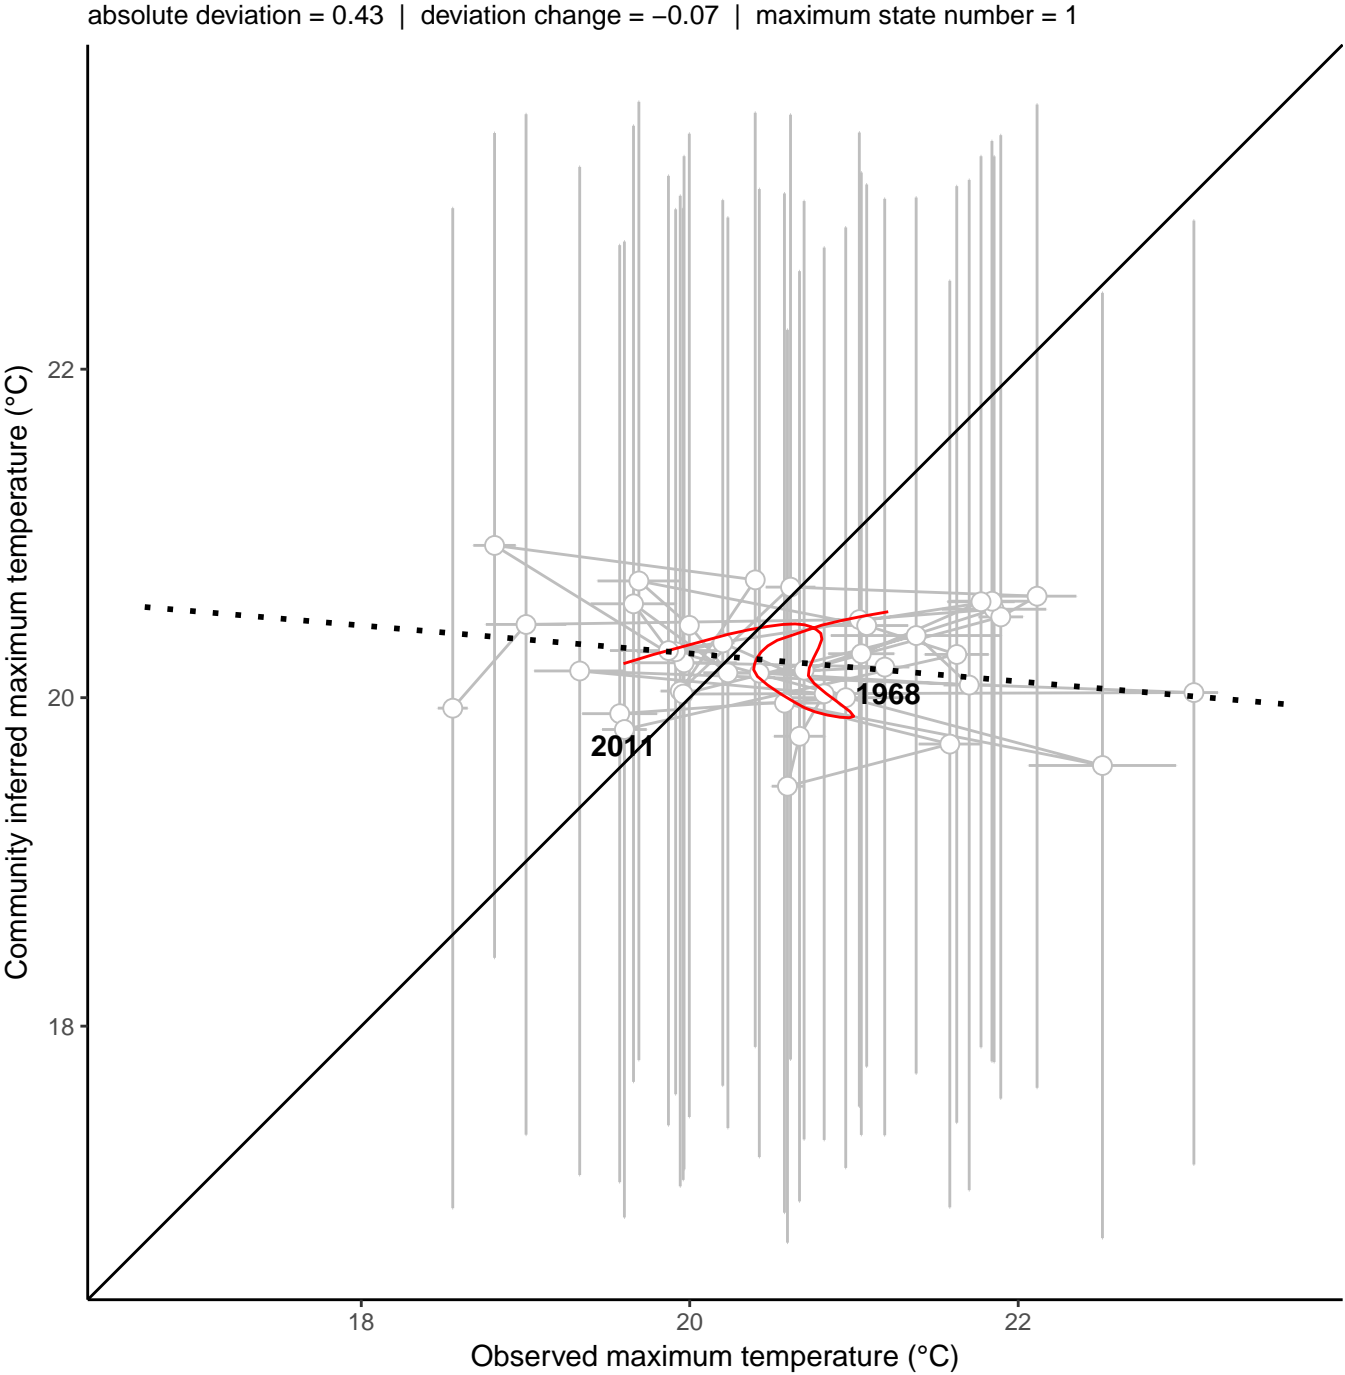



site : 840\_91\_10

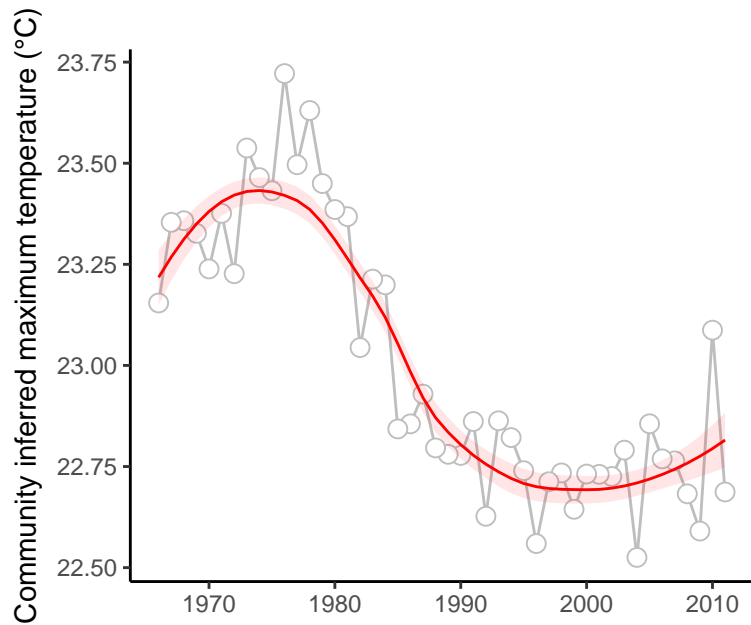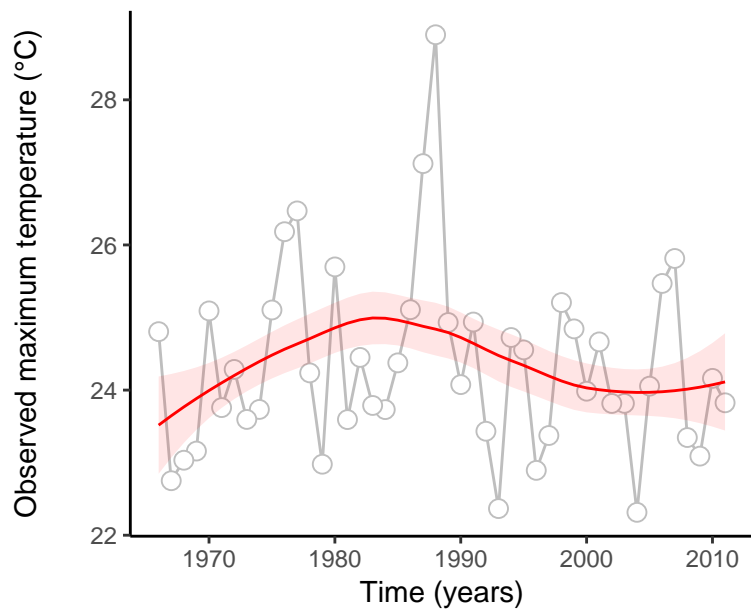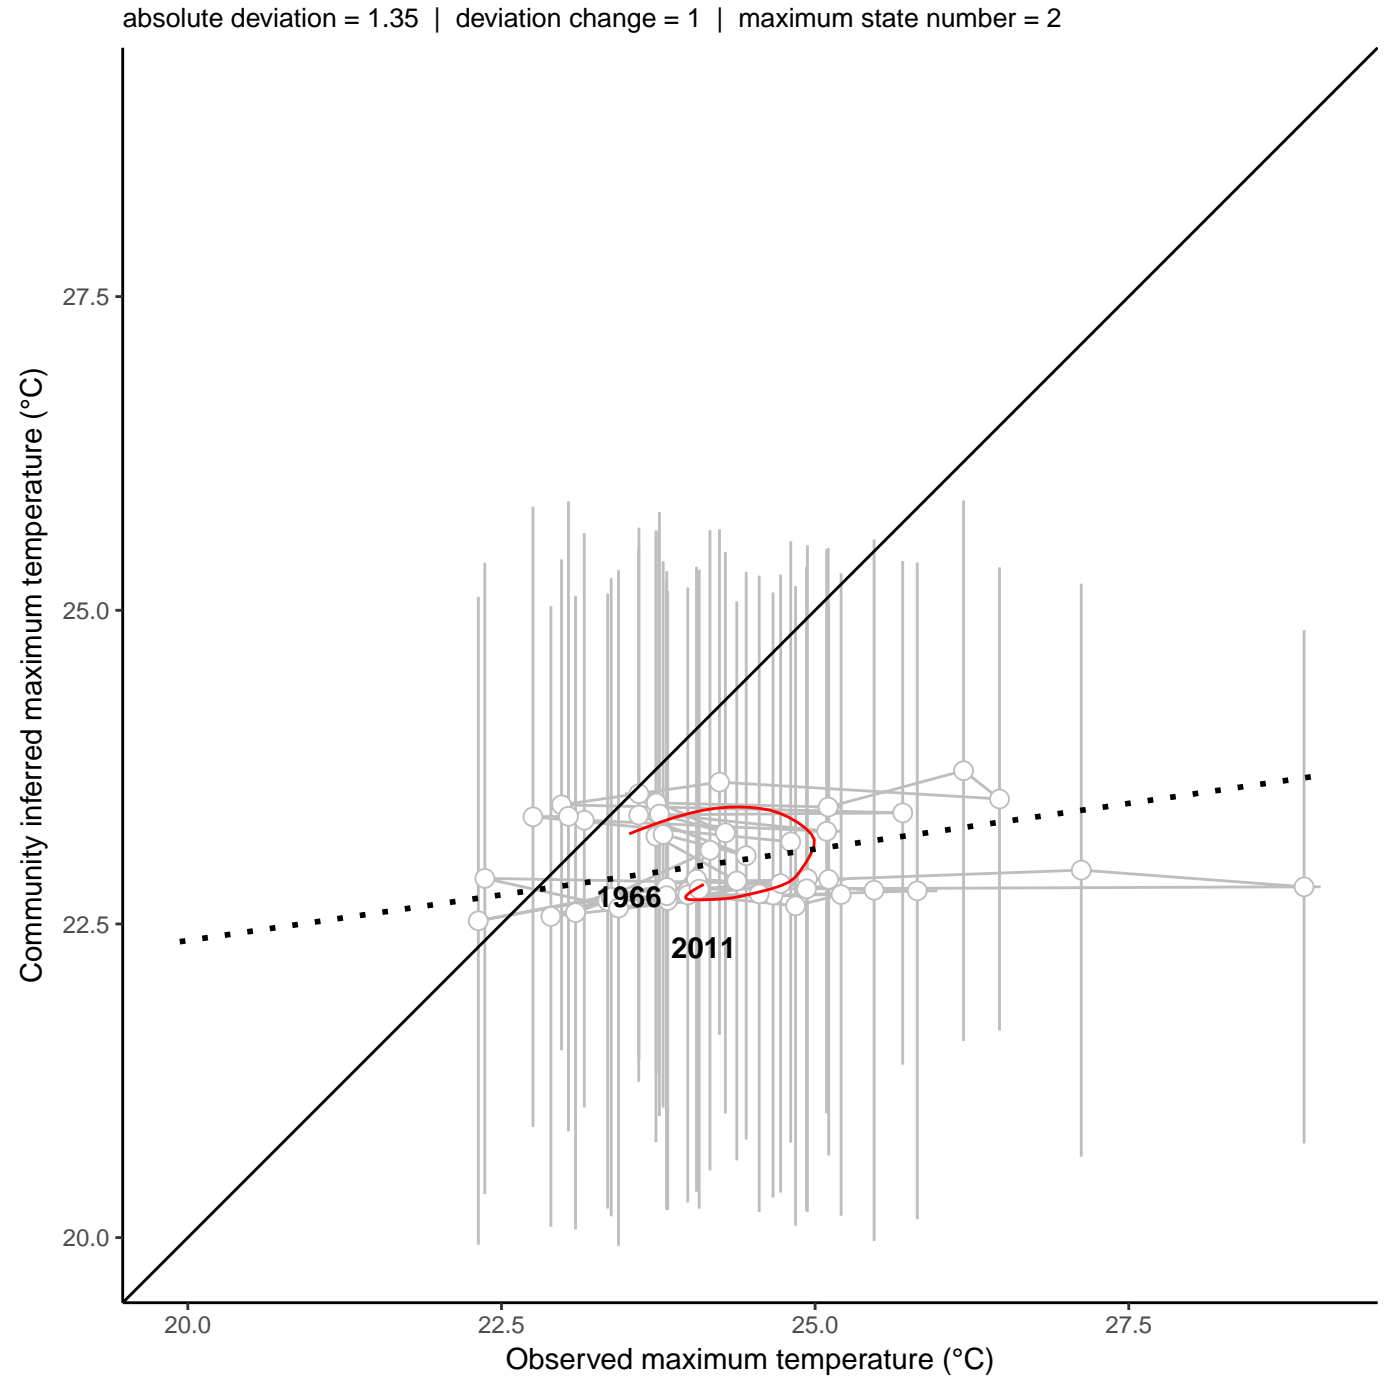

site : 840\_91\_60

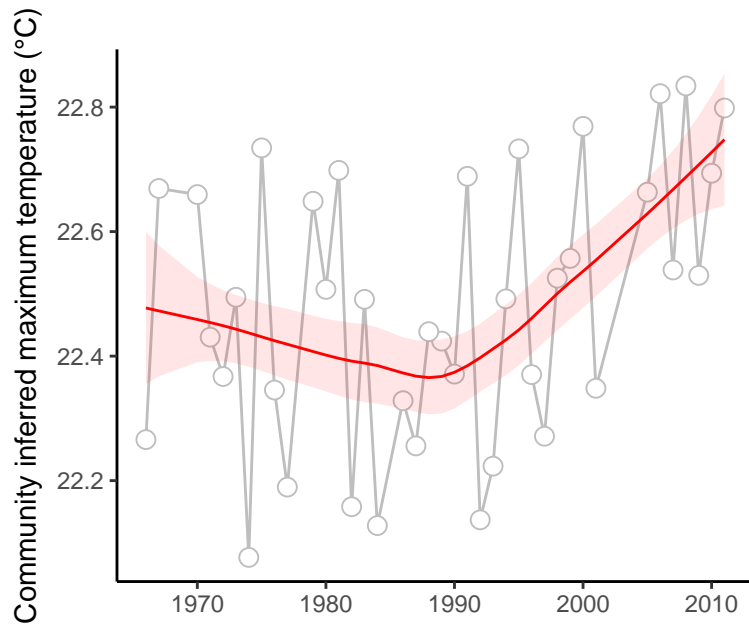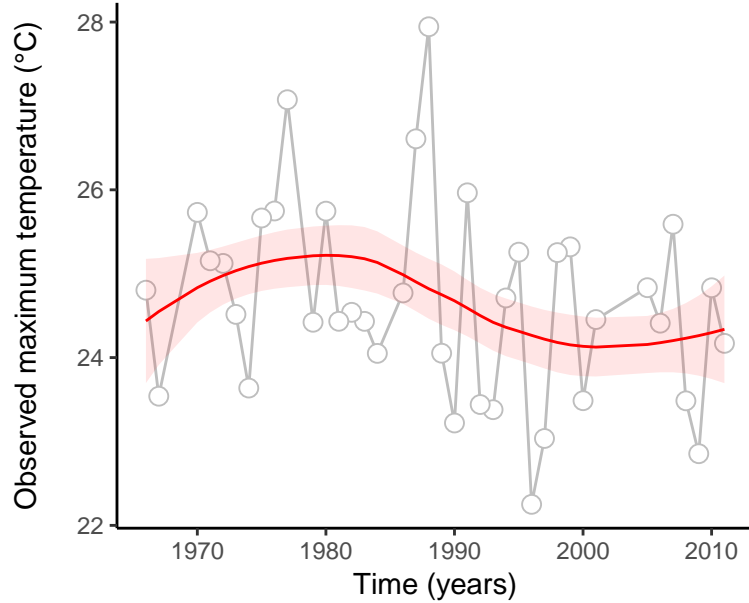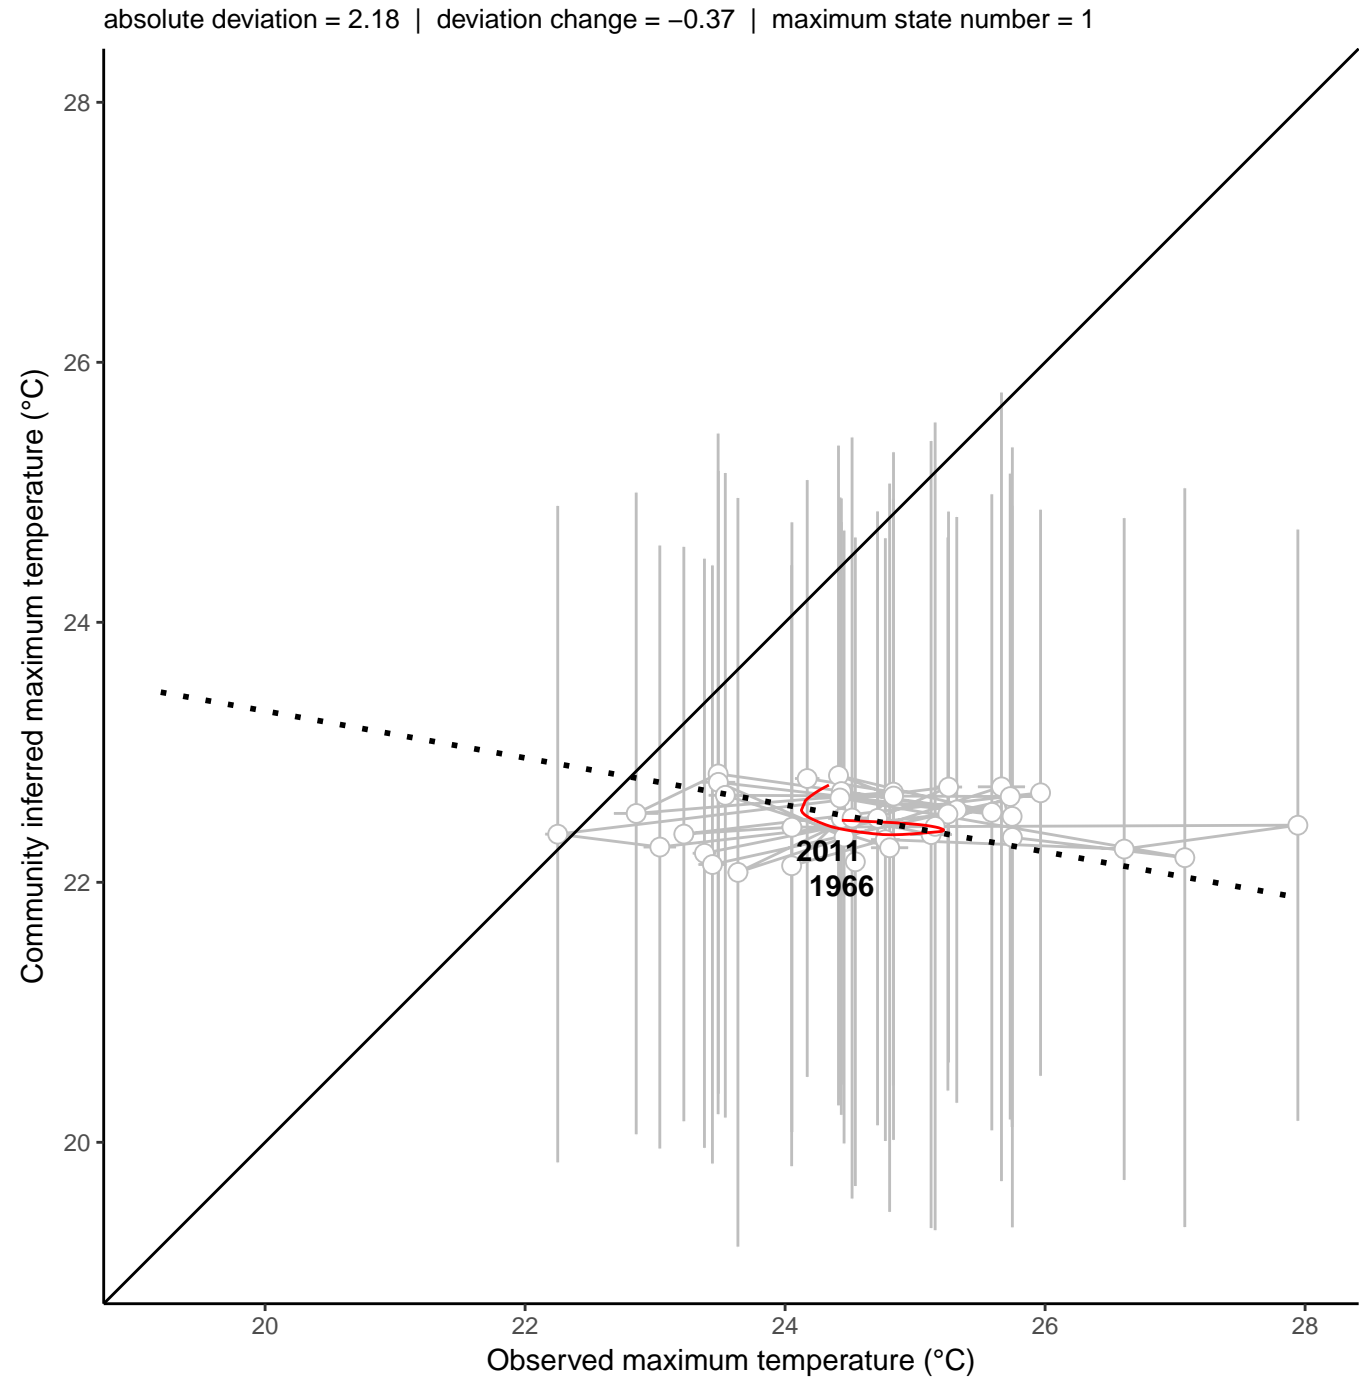

site : 840\_14\_1

absolute deviation = 1.37 | deviation change = -2.7 | maximum state number = 1

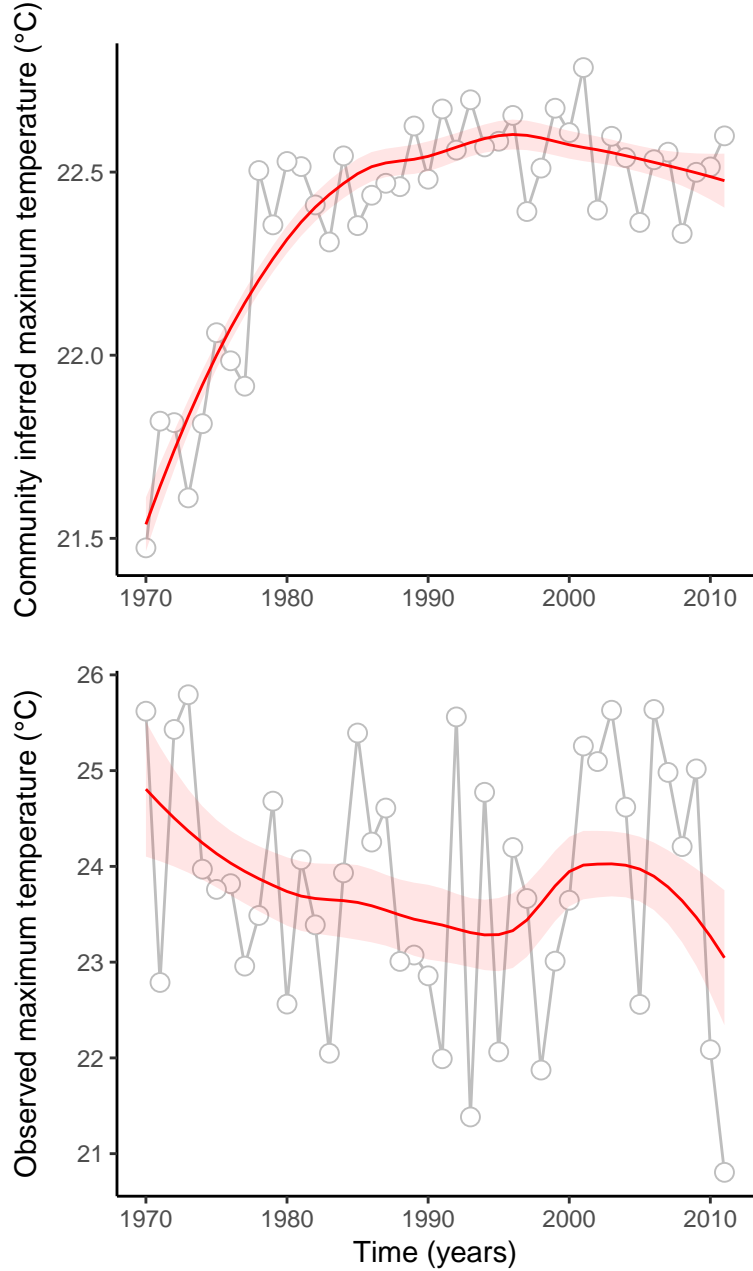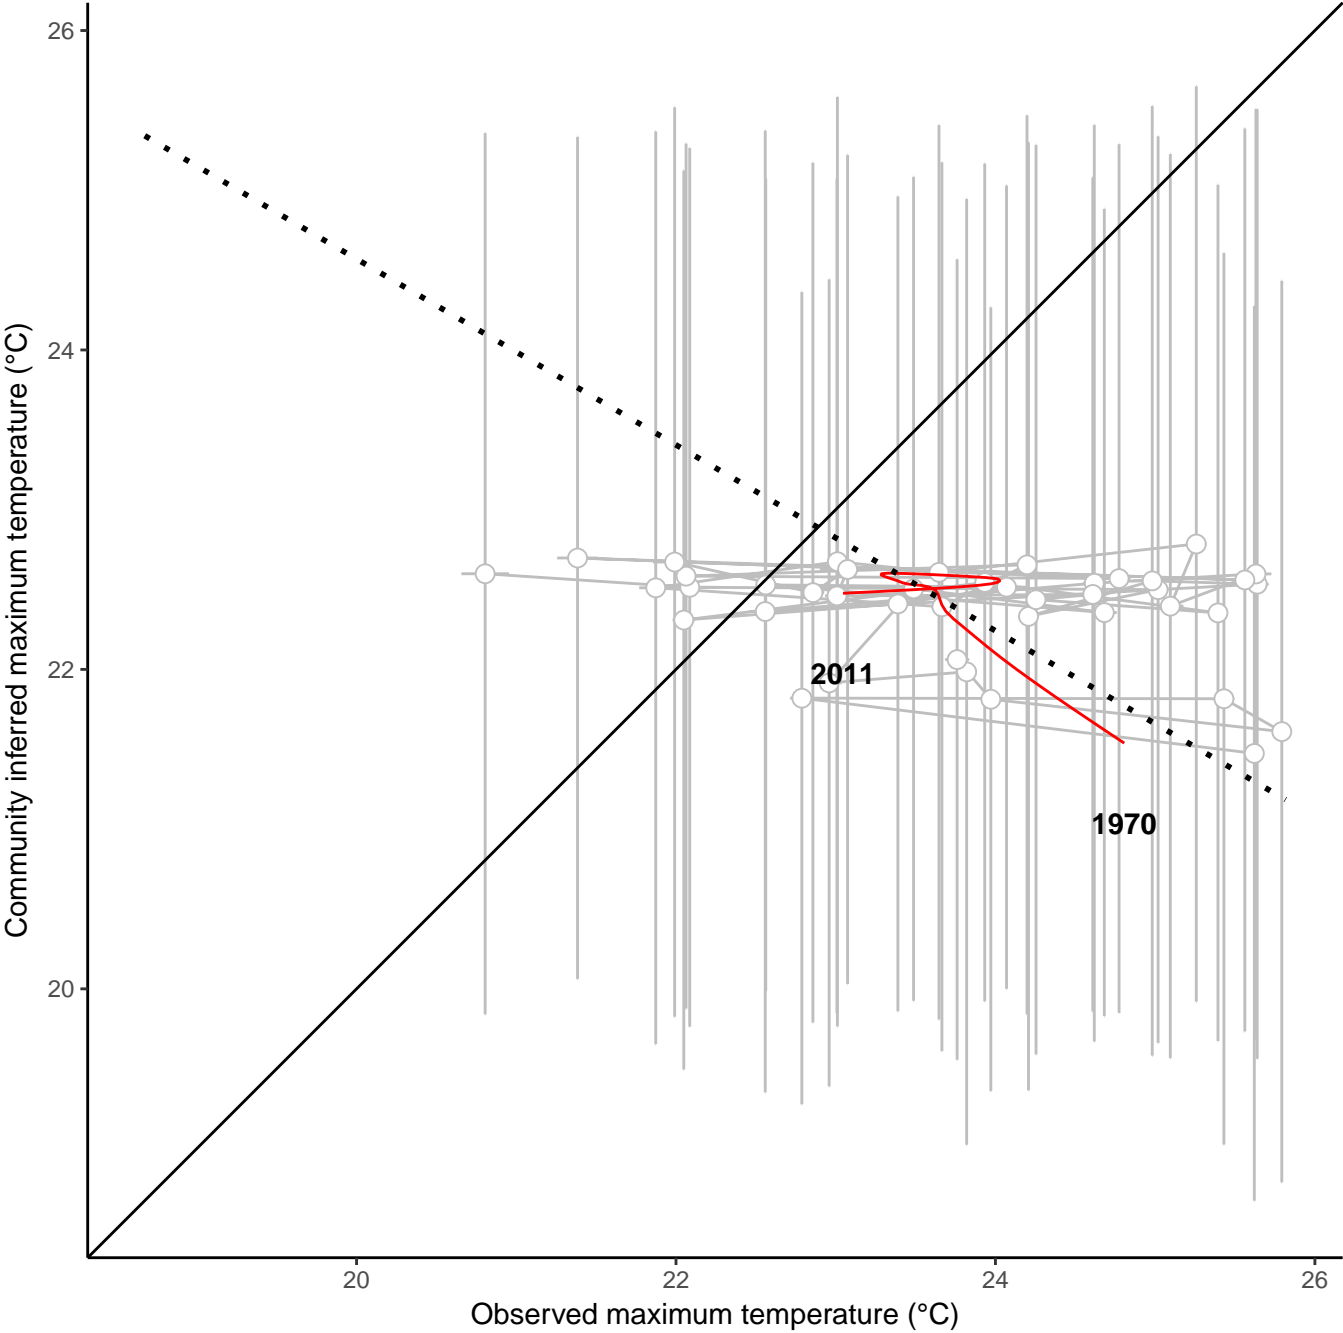

site : 840\_27\_38

absolute deviation = 5.1 | deviation change = 1.79 | maximum state number = 1

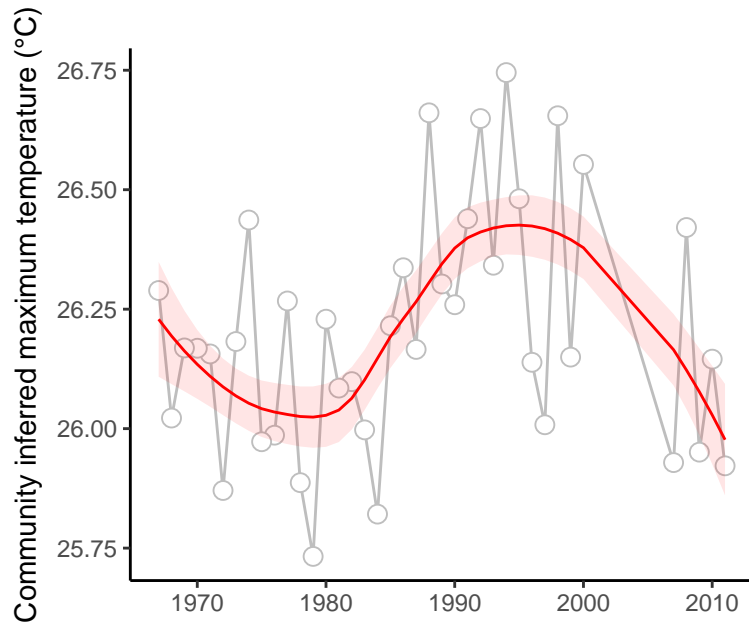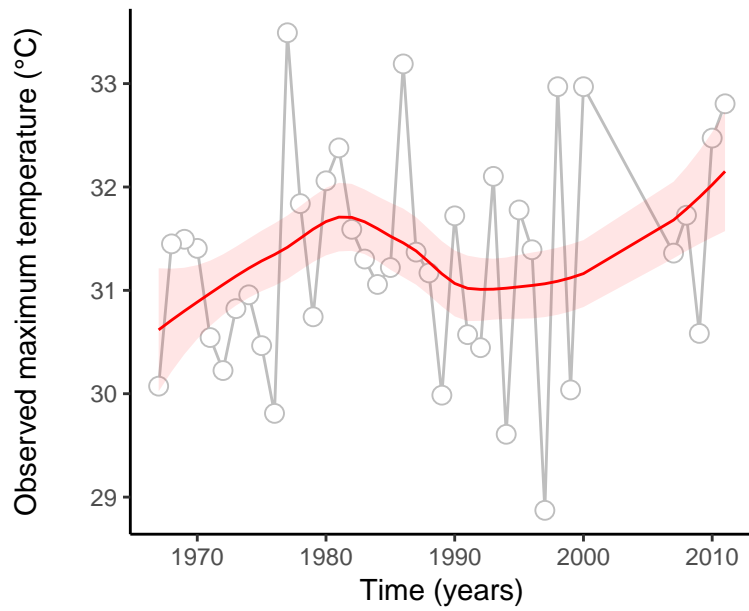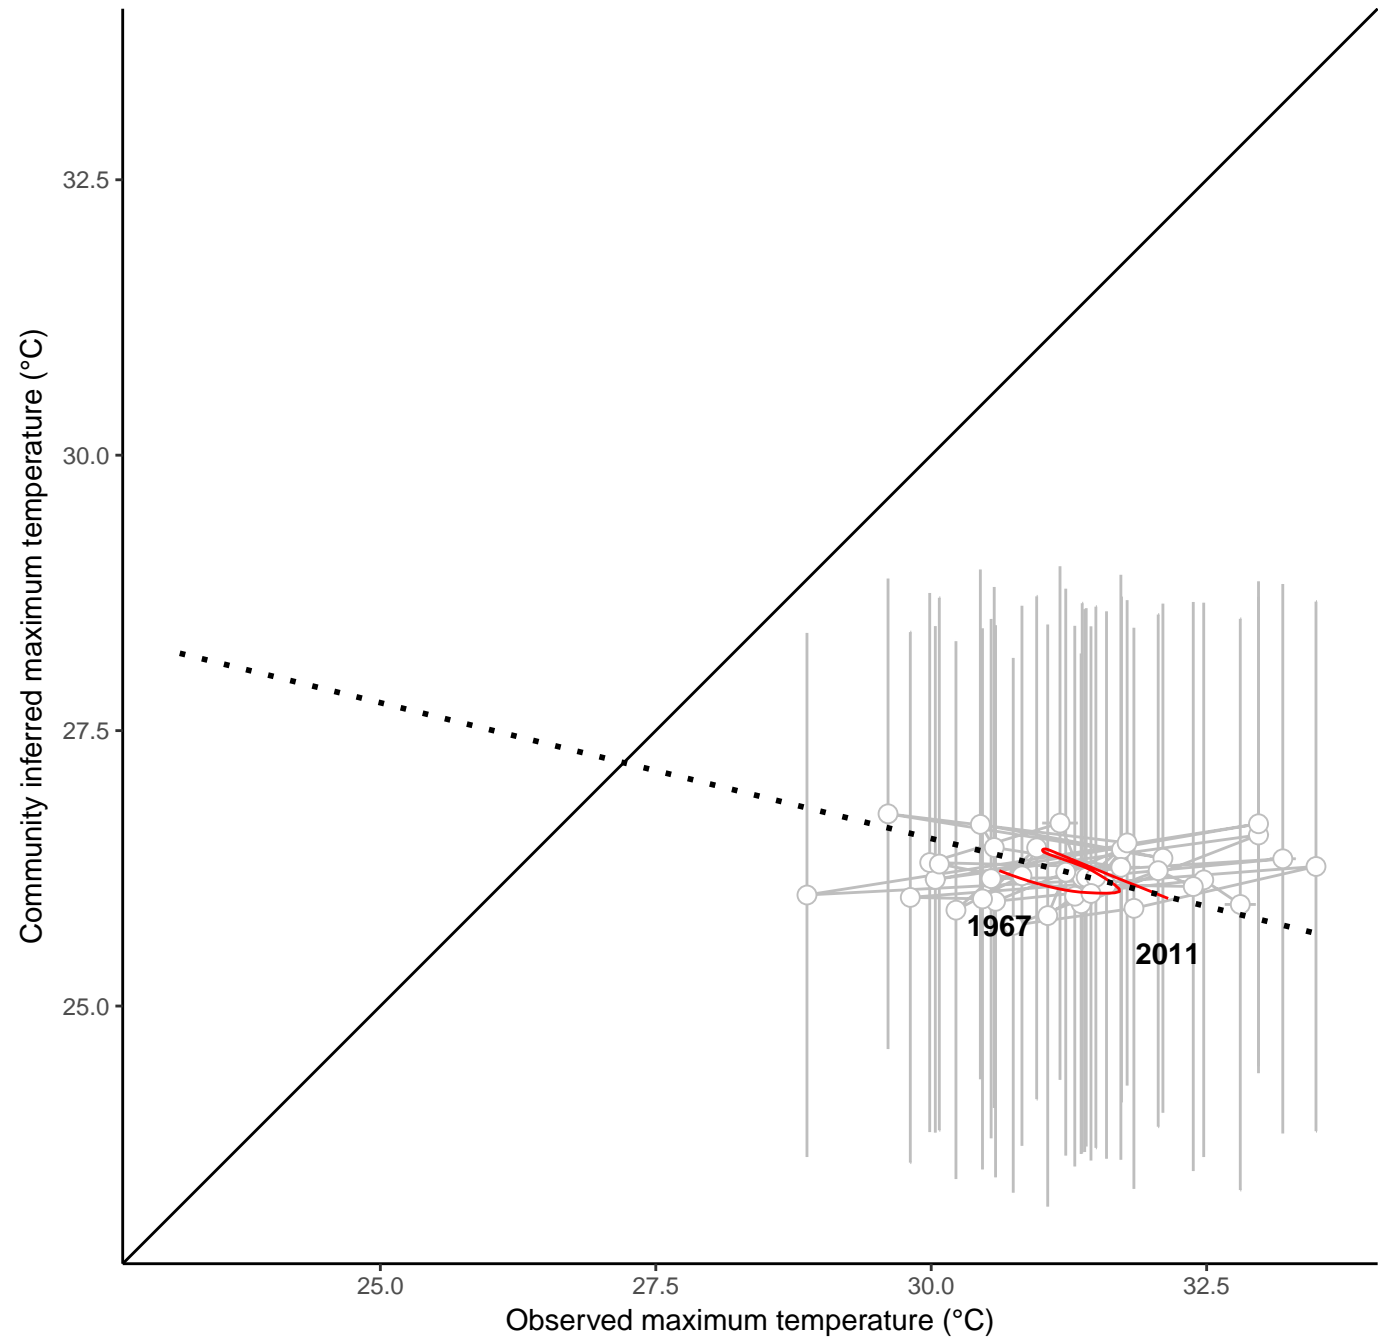

site : 840\_35\_2

absolute deviation = 2.24 | deviation change = 0.9 | maximum state number = 1

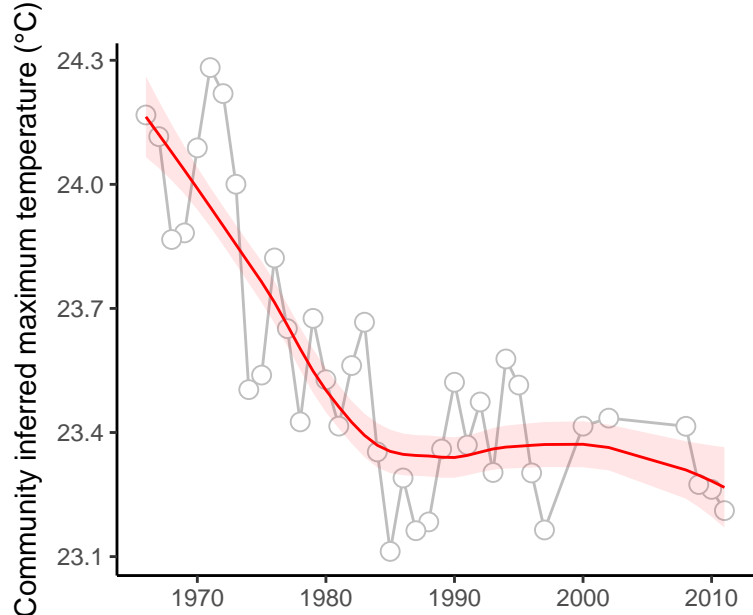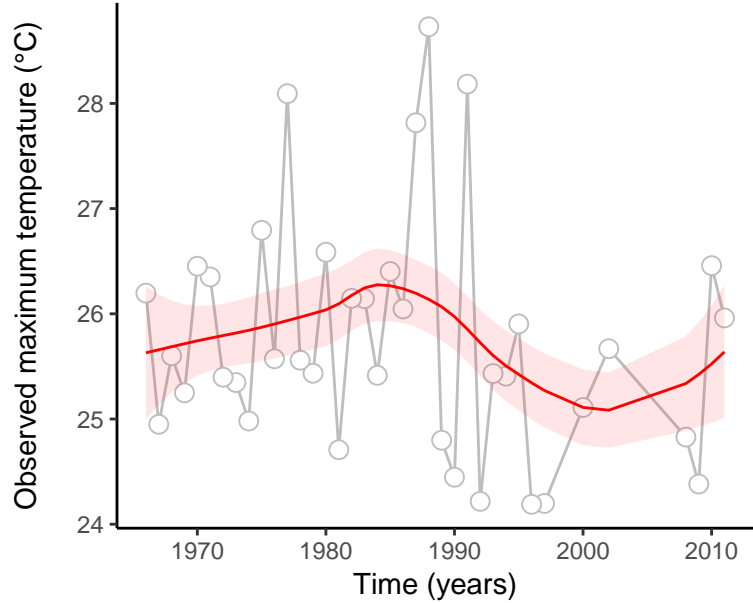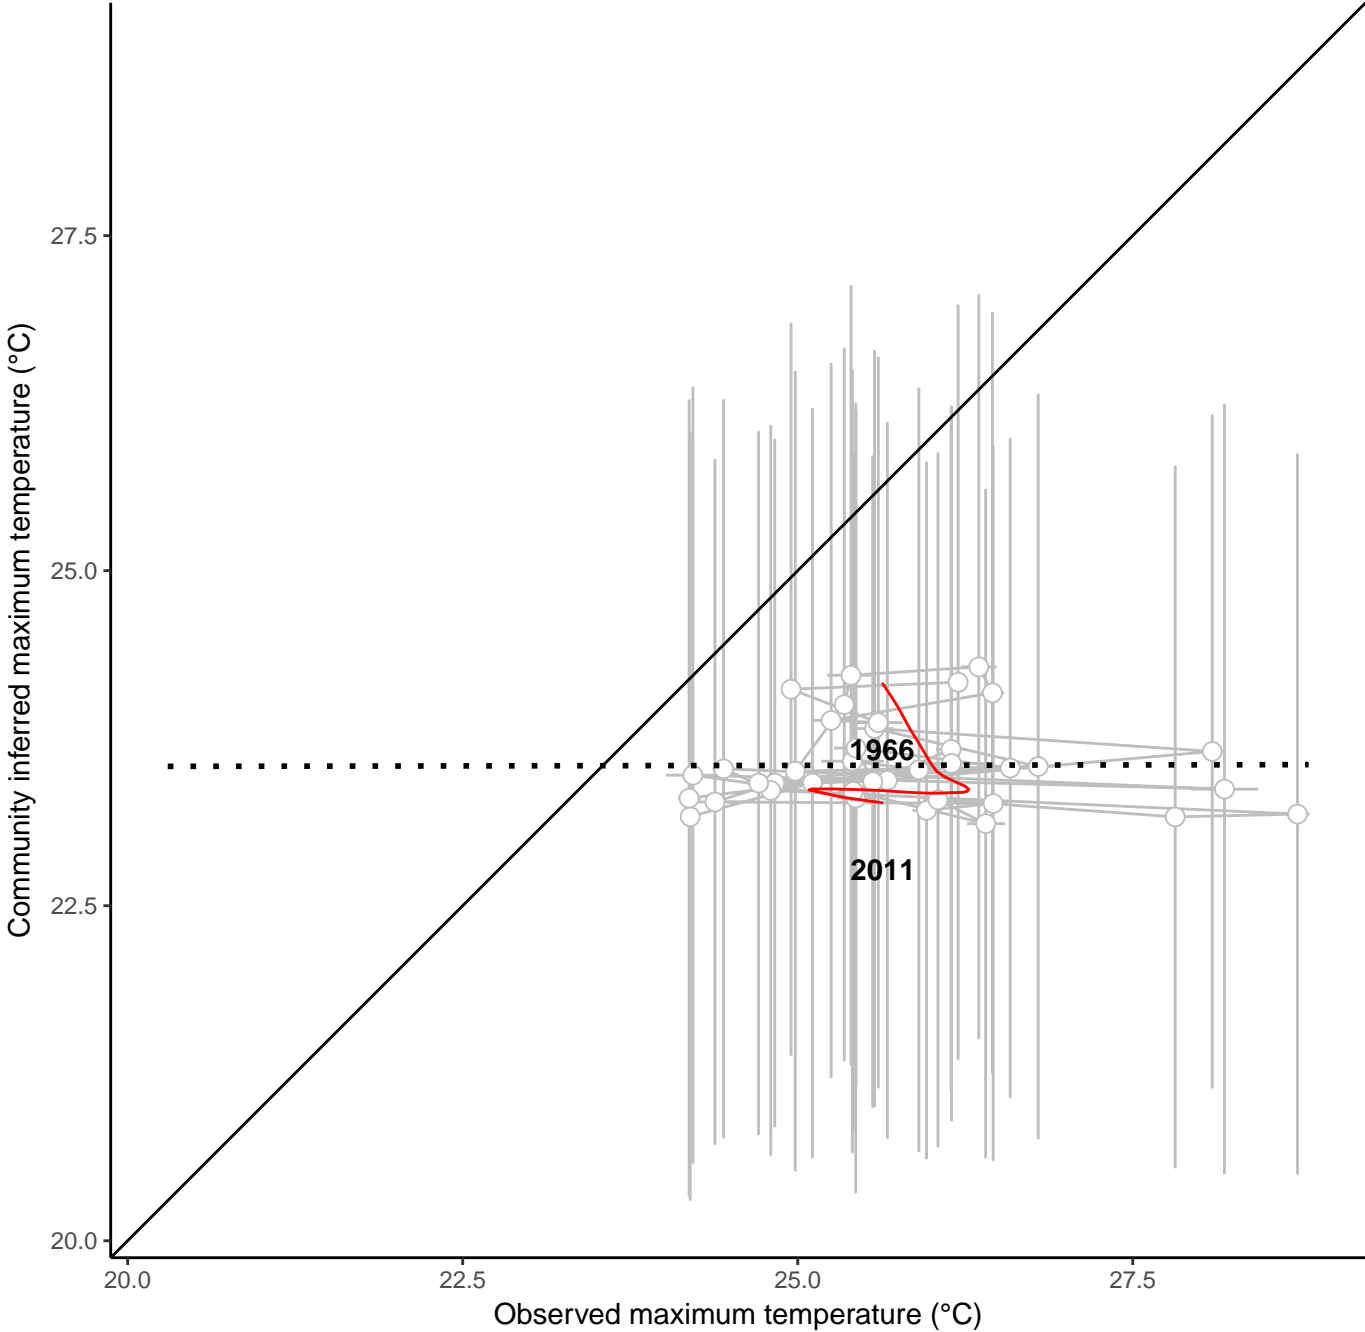

site : 840\_46\_29

absolute deviation = 2.84 | deviation change = 0.06 | maximum state number = 1

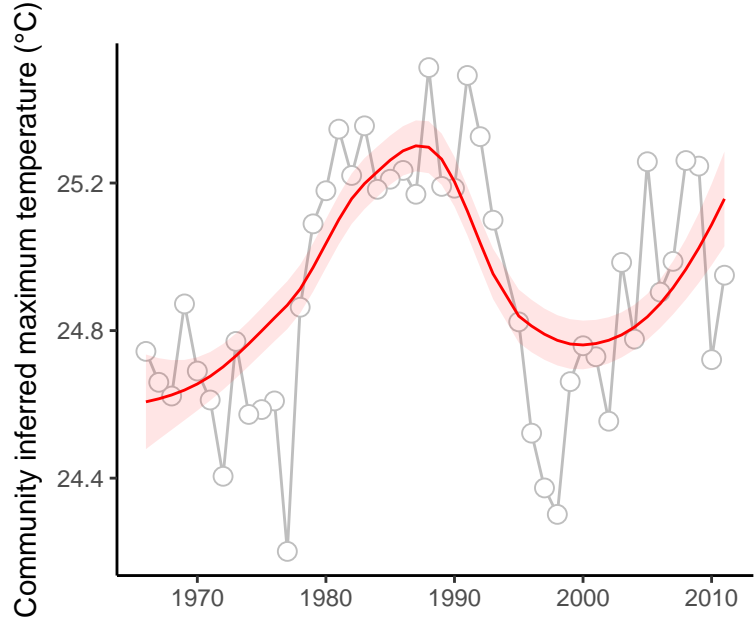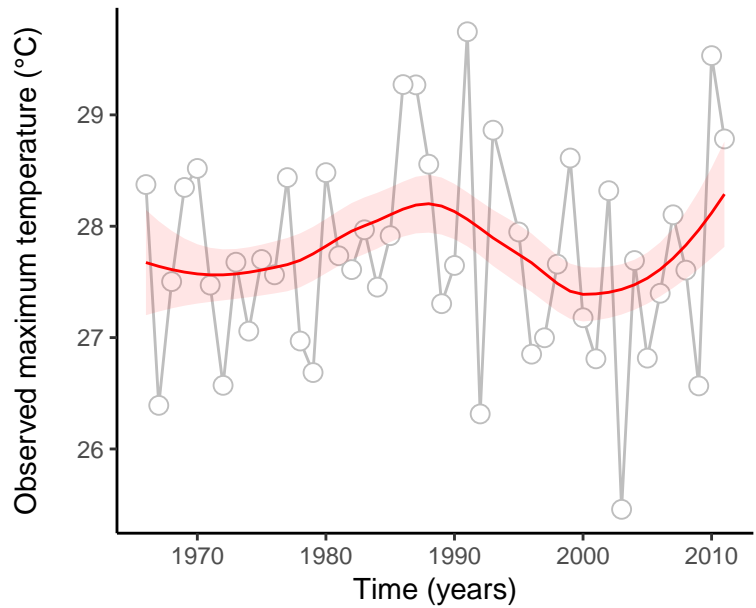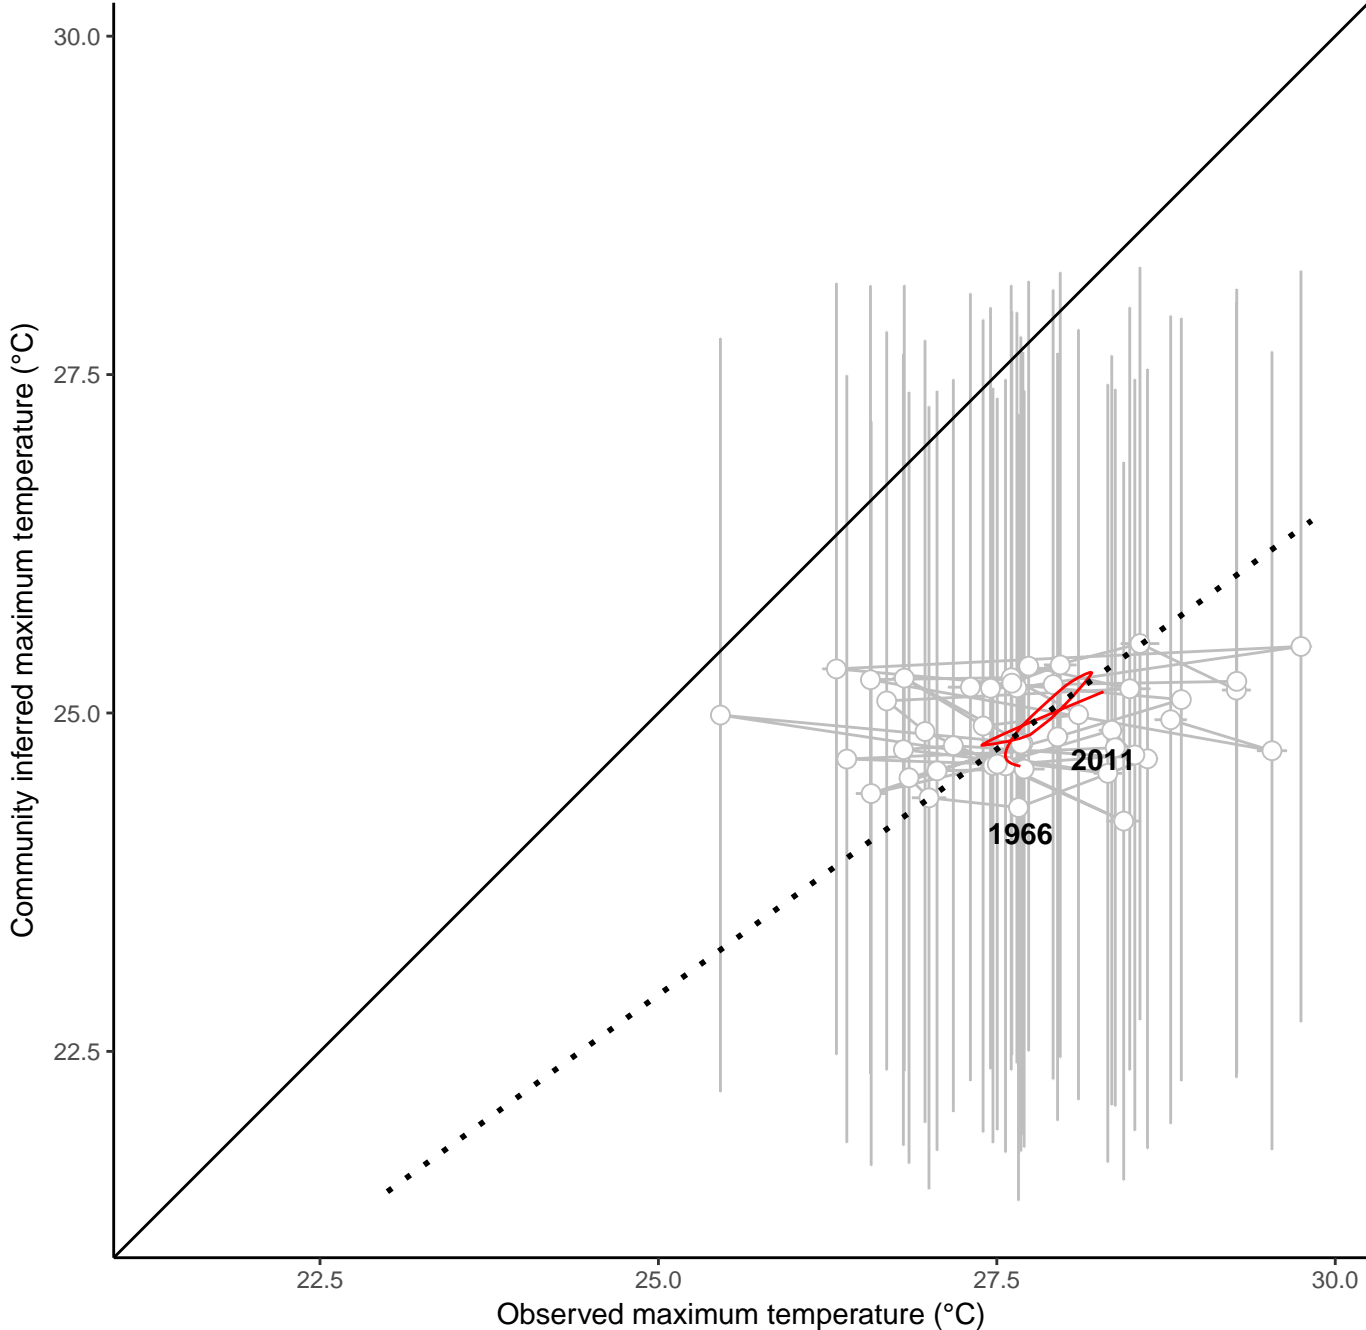

site : 840\_50\_18

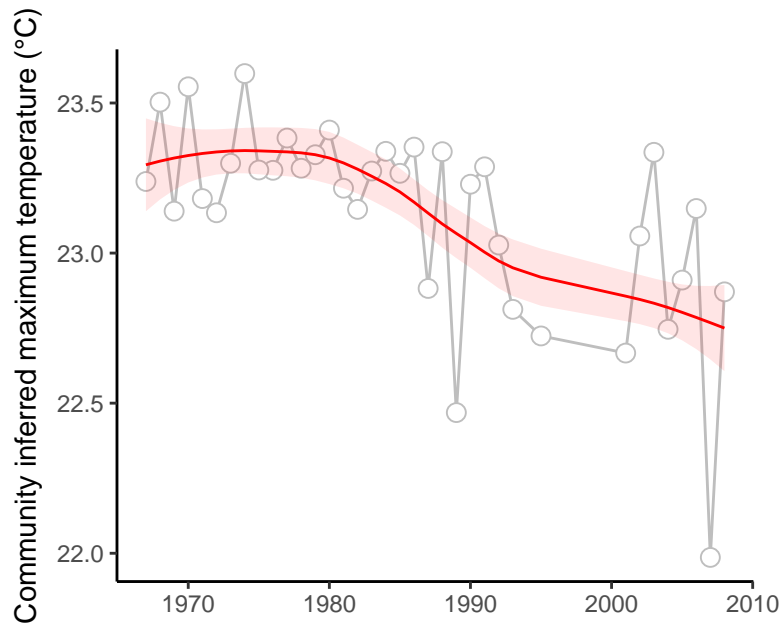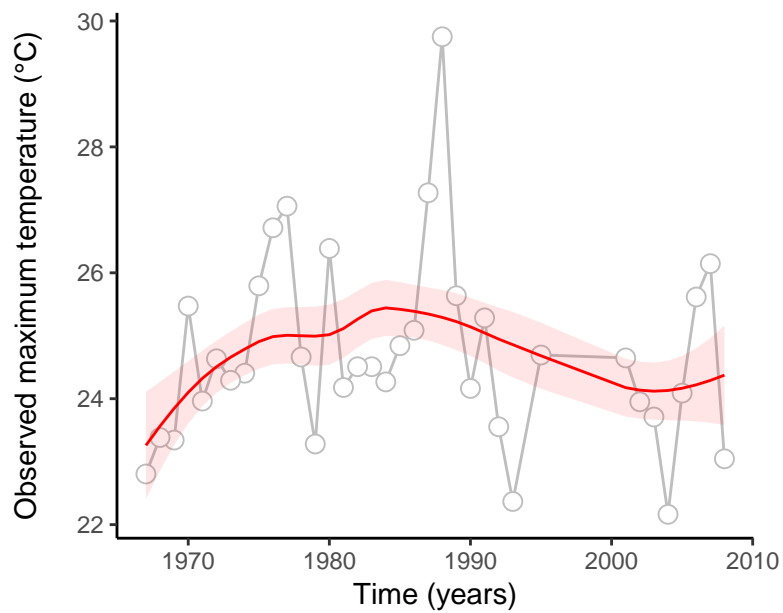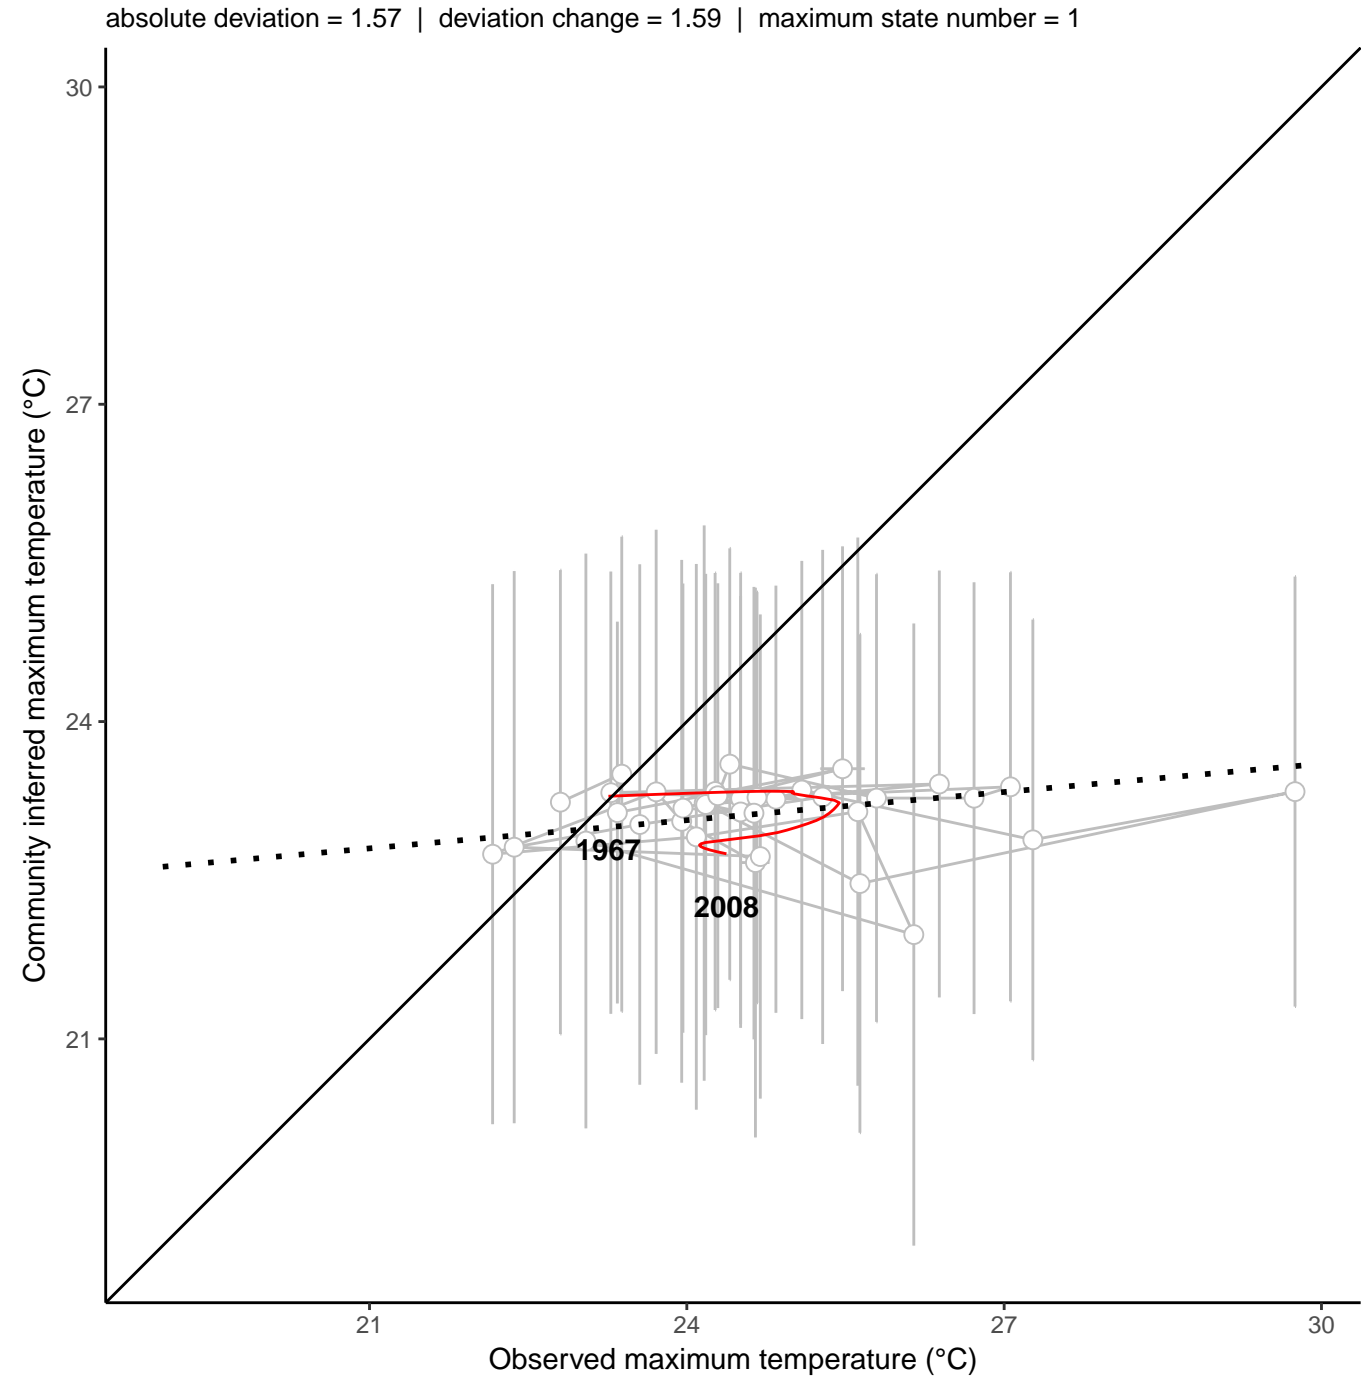

site : 840\_52\_11

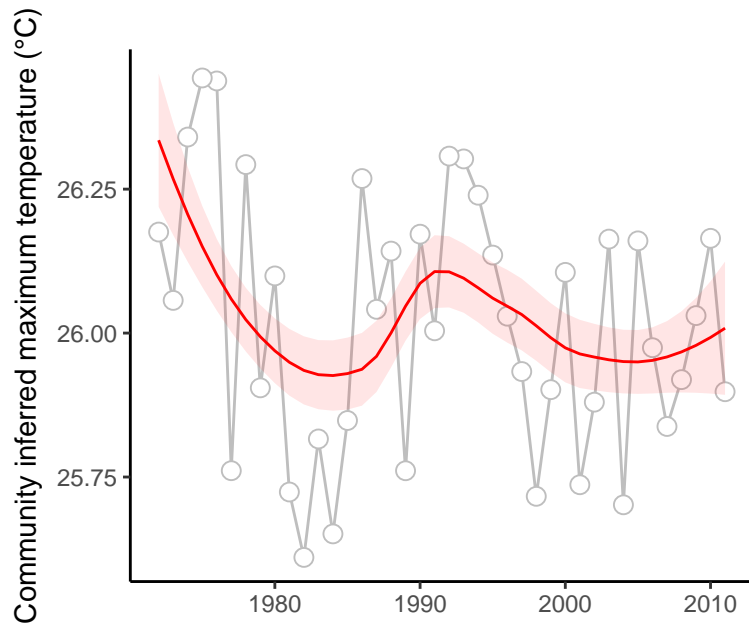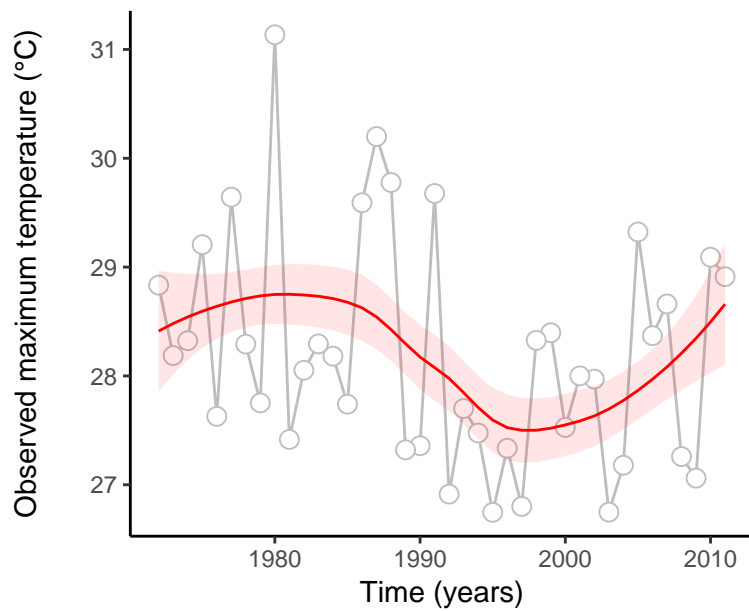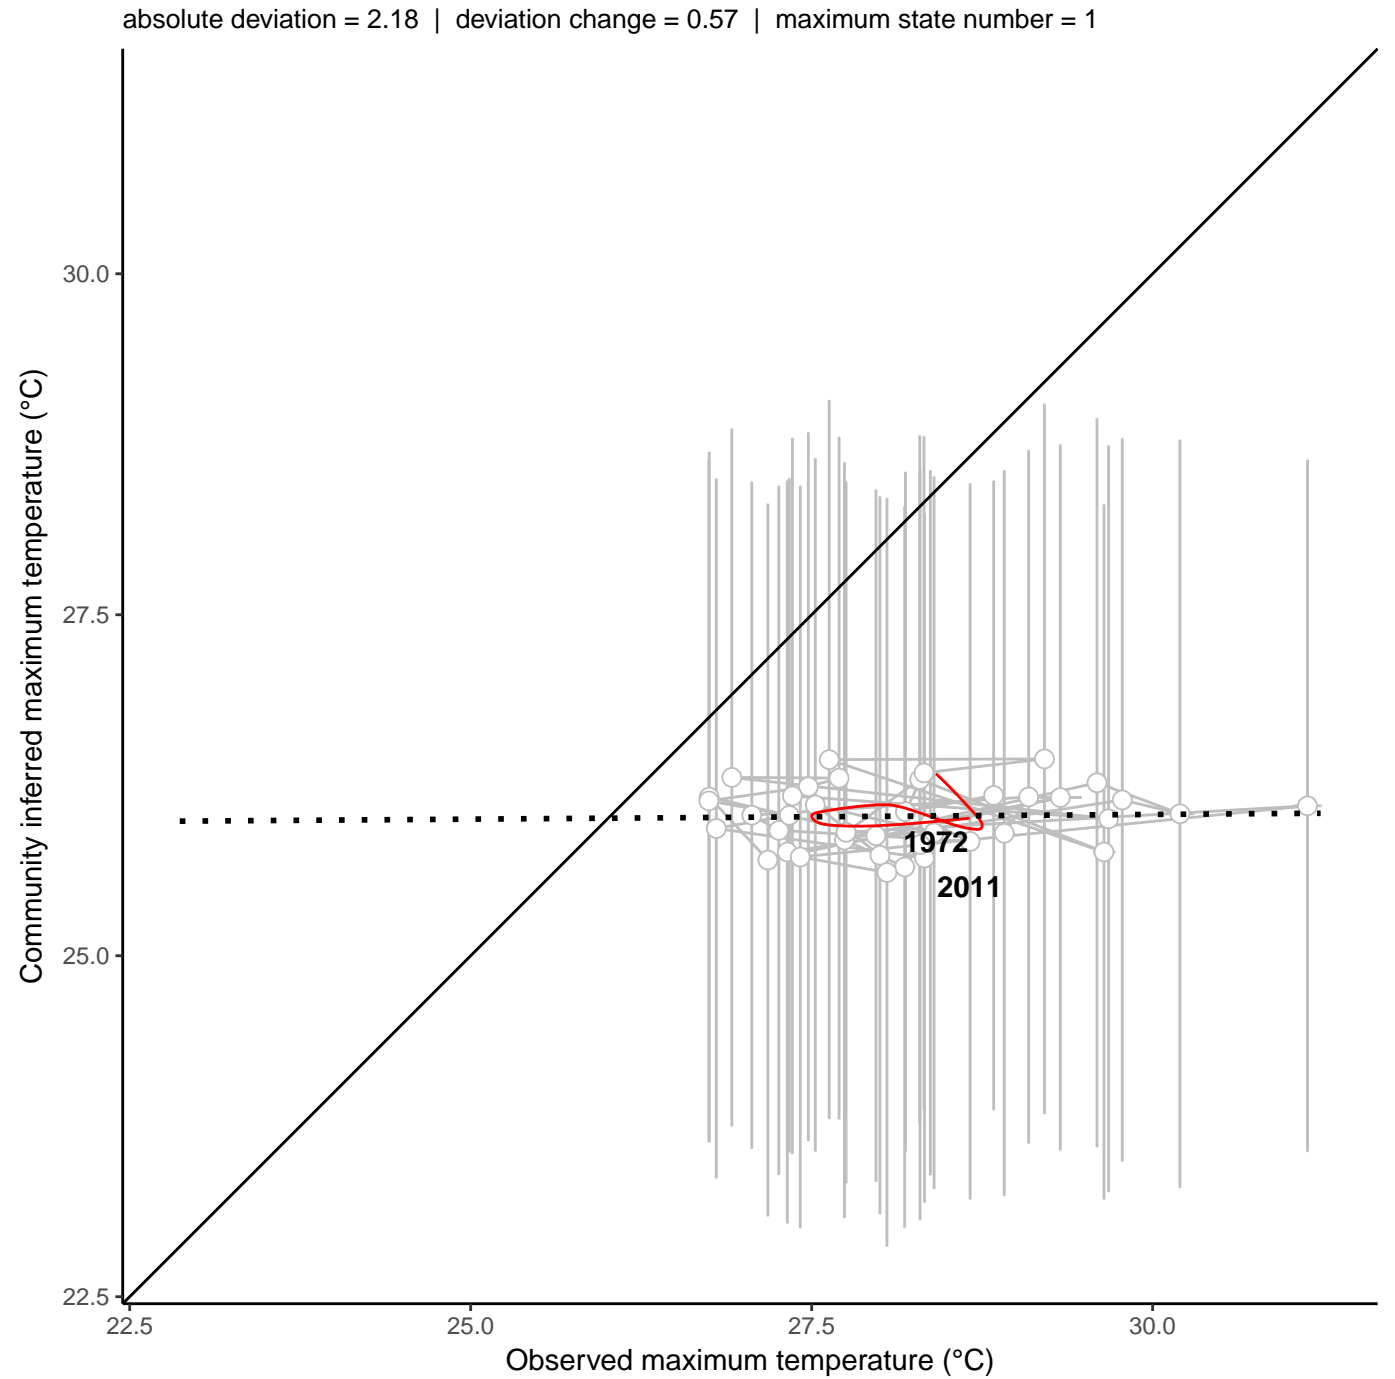



site : 840\_53\_2

absolute deviation = 0.9 | deviation change = 0.28 | maximum state number = 1

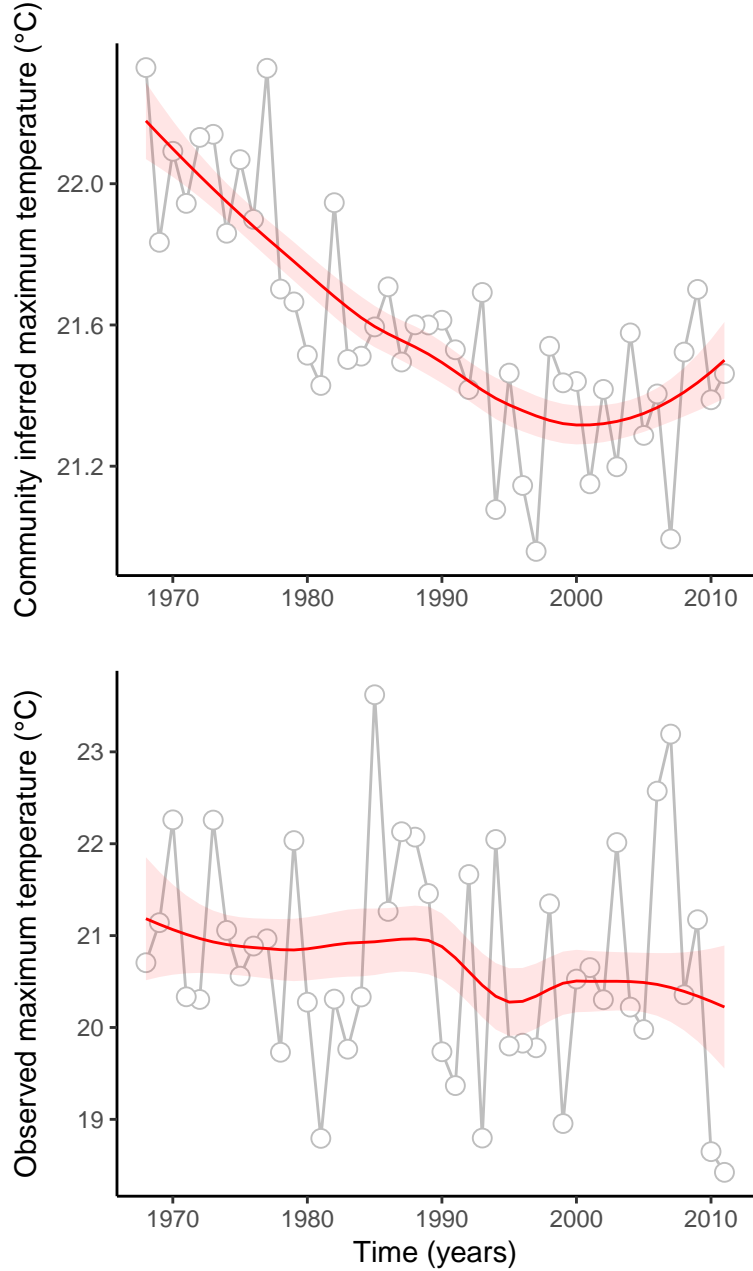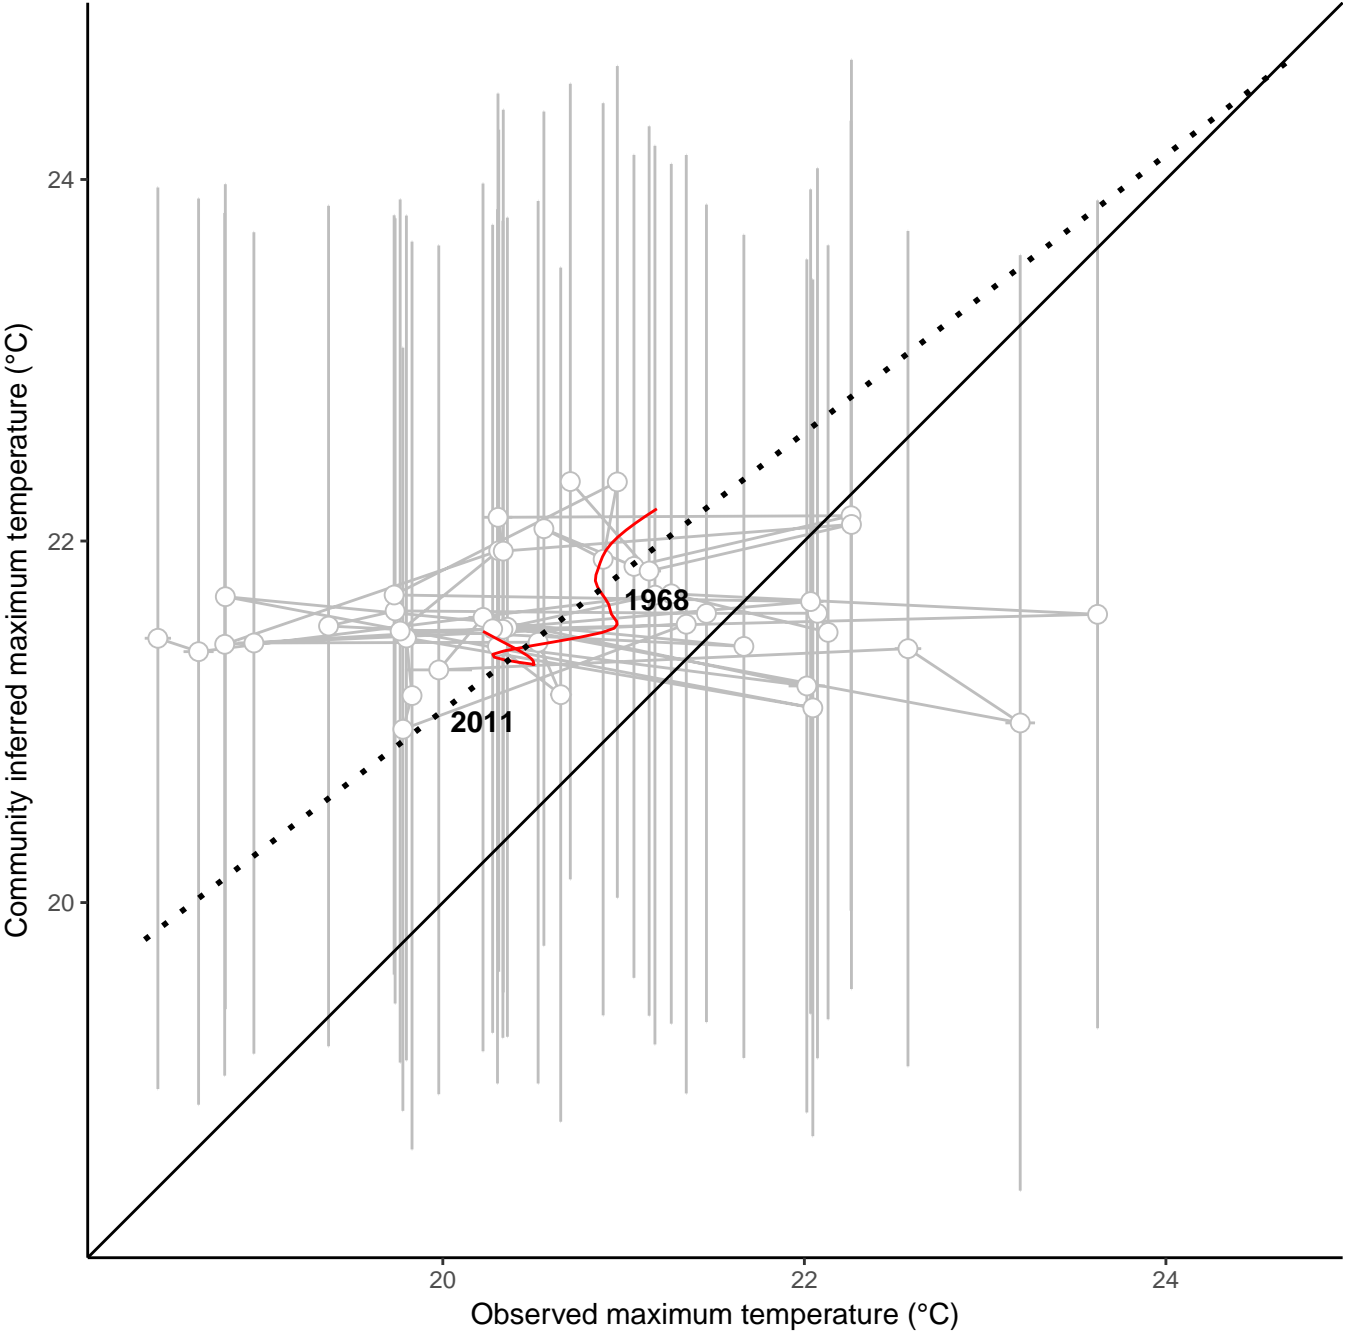

site : 840\_7\_27

absolute deviation = 2.94 | deviation change = -0.02 | maximum state number = 2

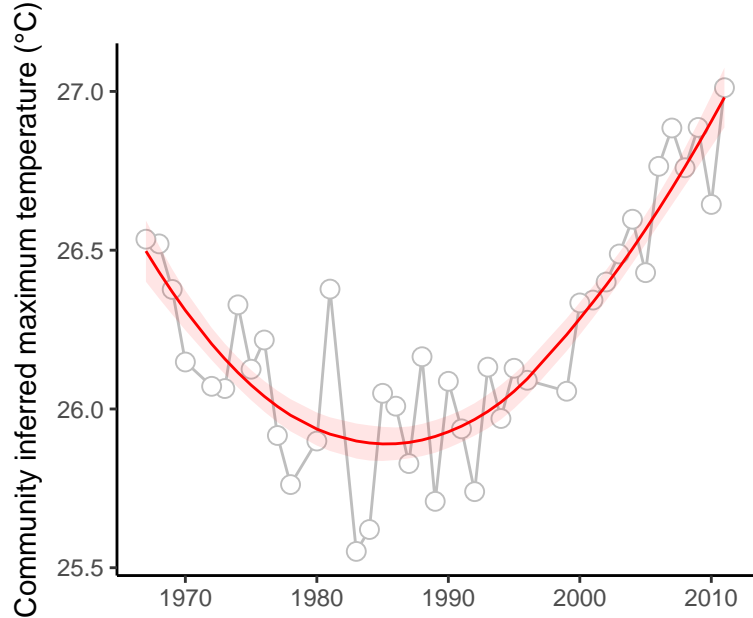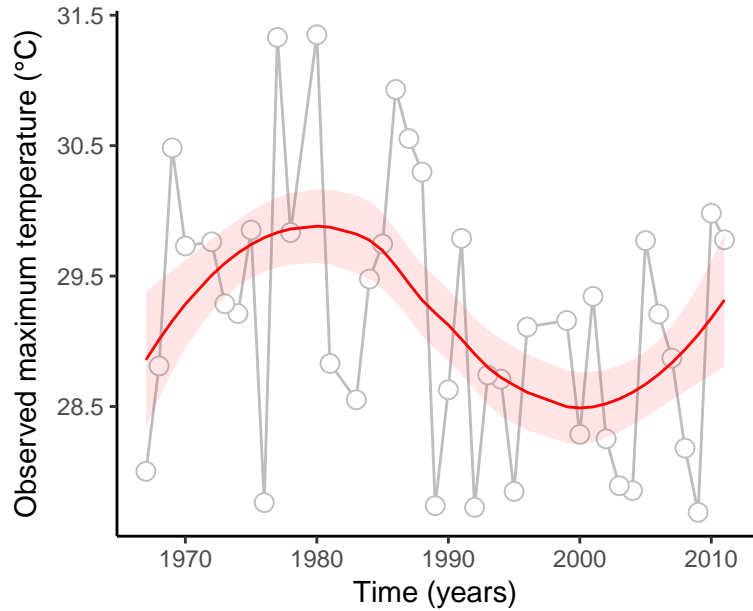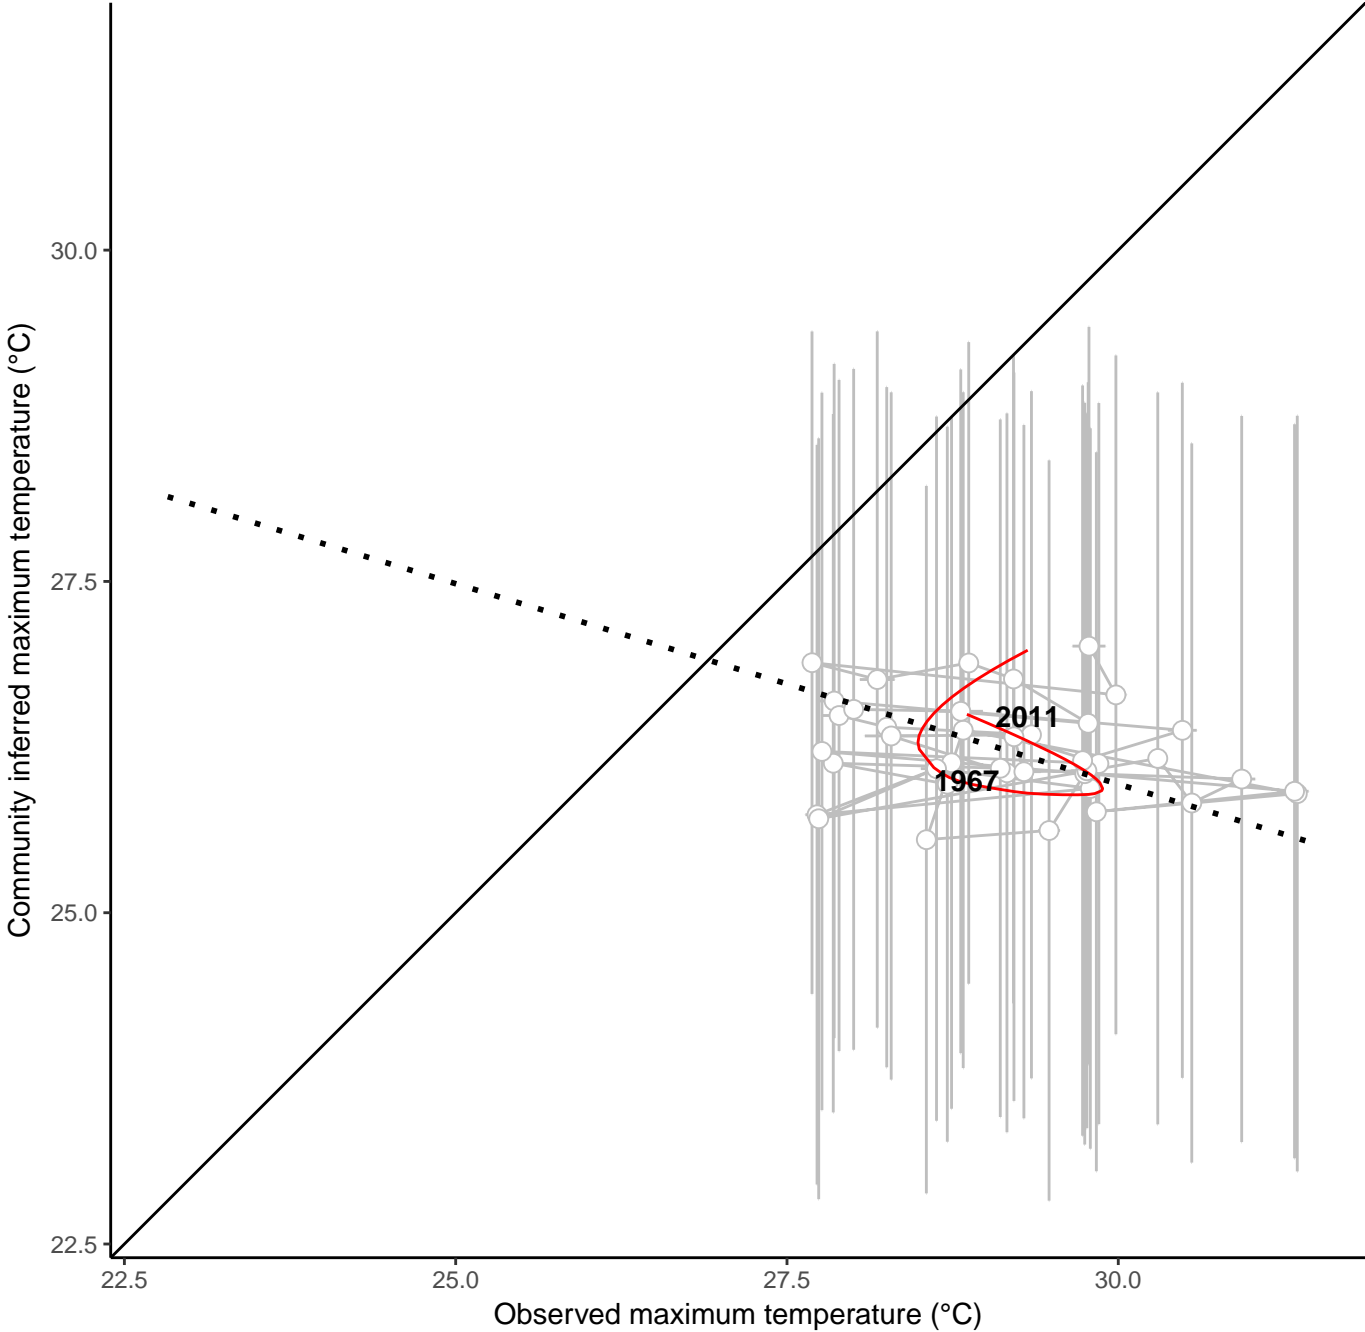

site : 840\_7\_29

absolute deviation = 3.88 | deviation change = 2.77 | maximum state number = 2

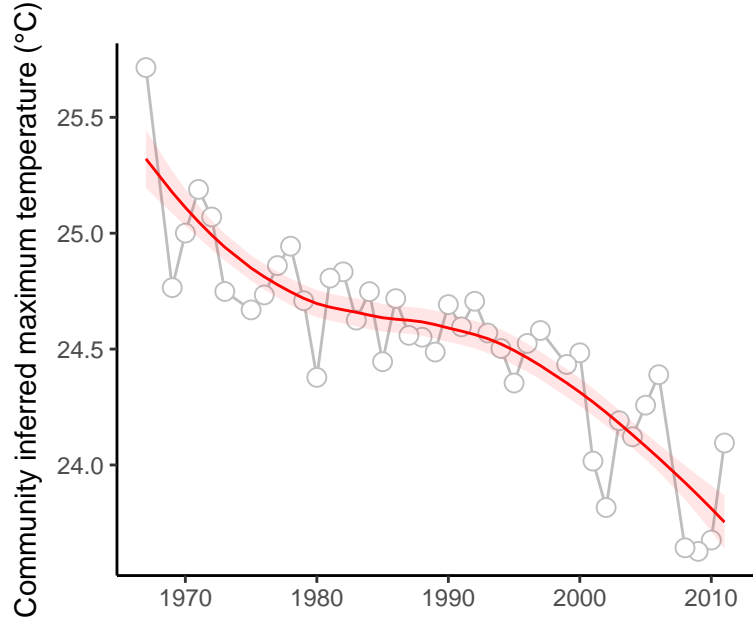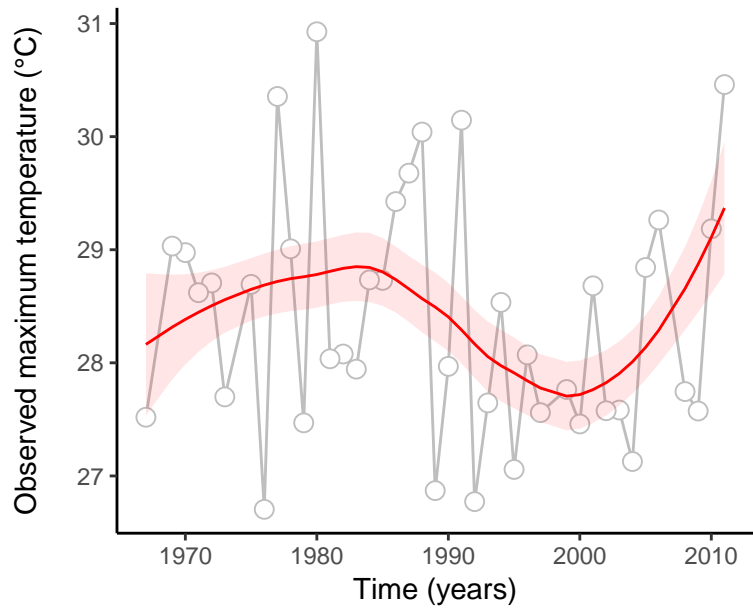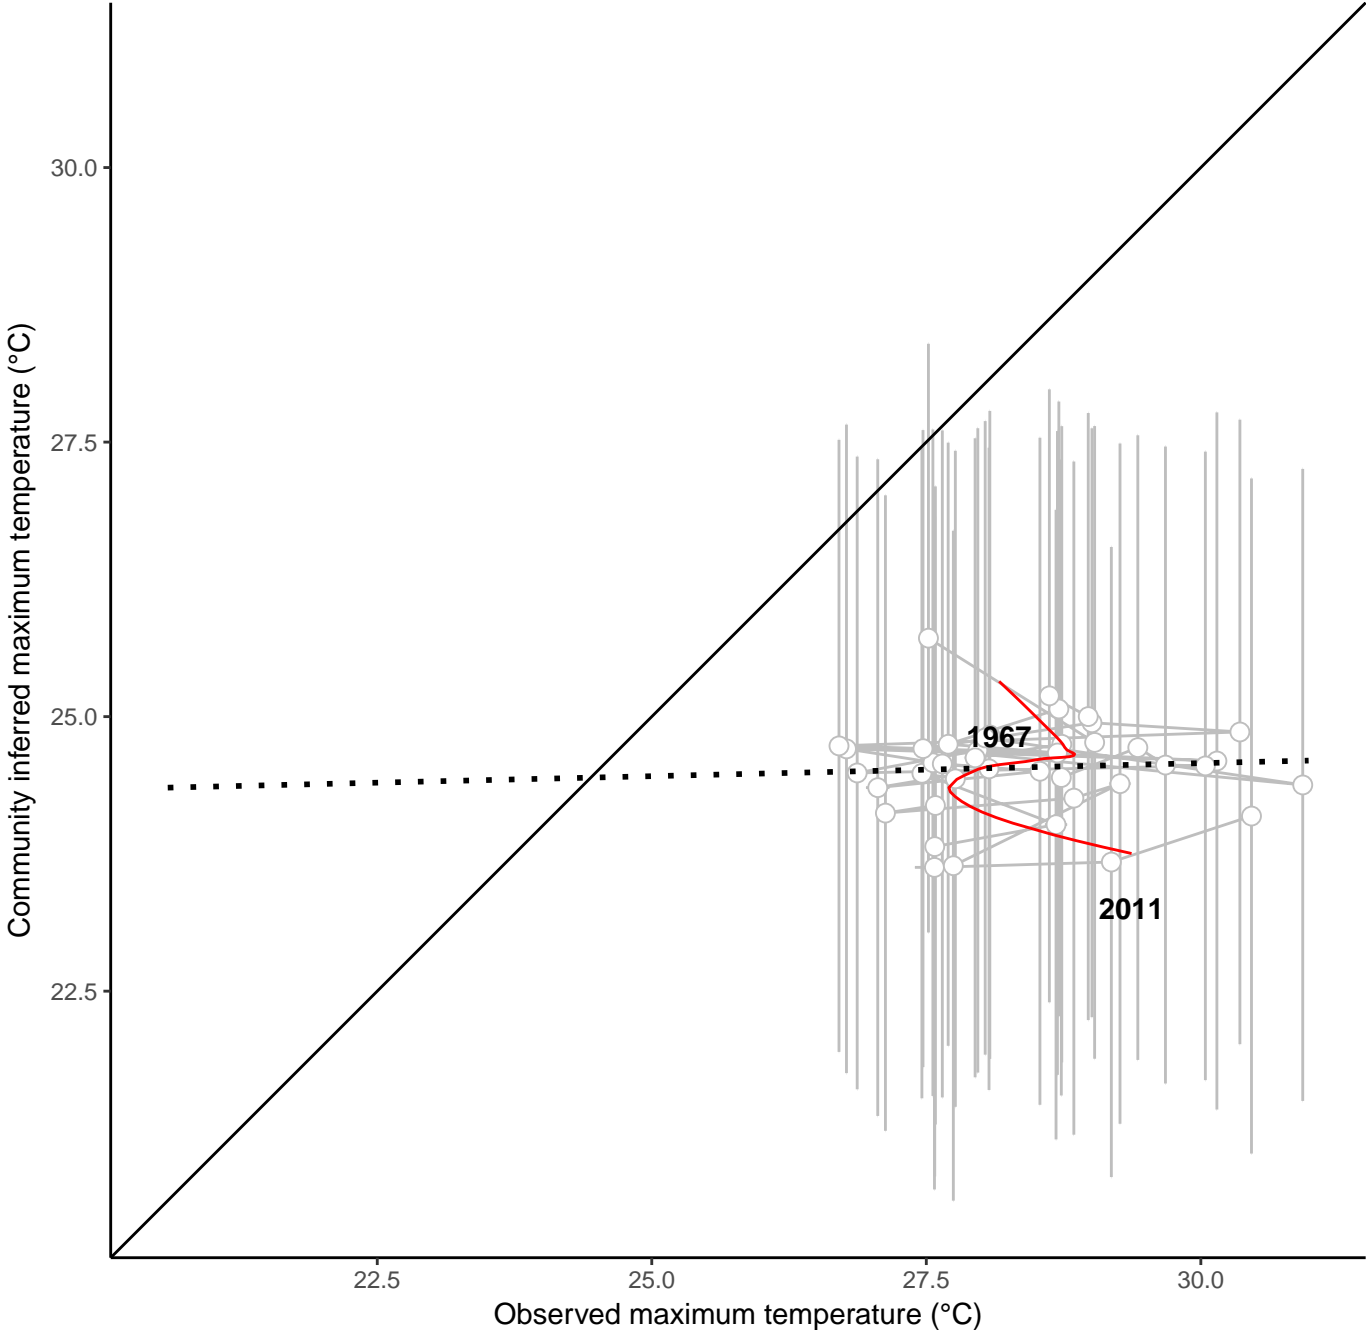

site : 840\_87\_17

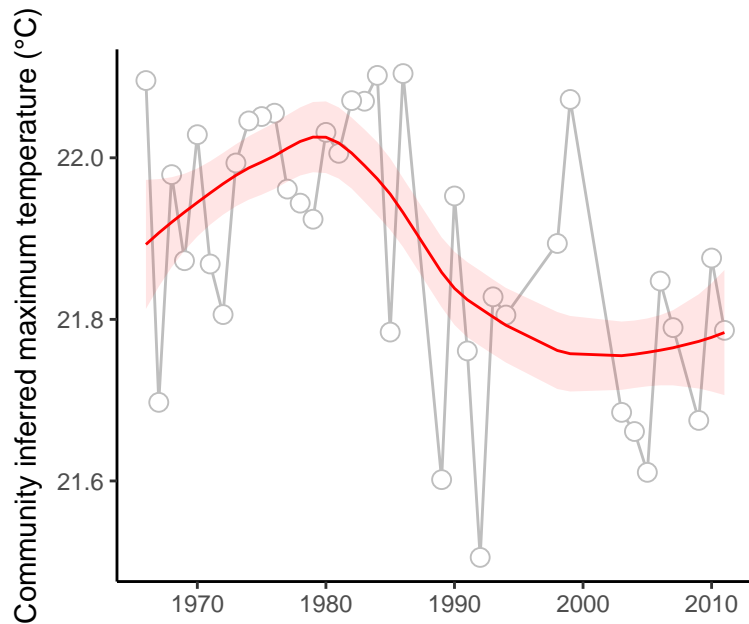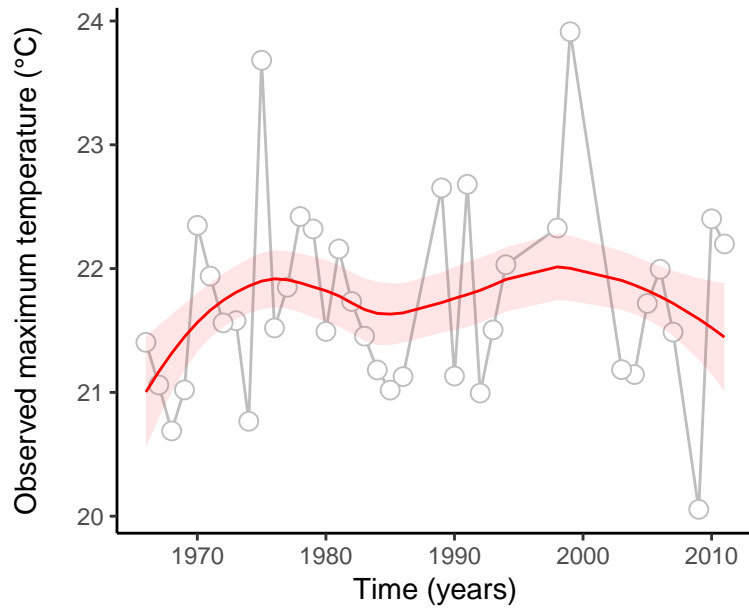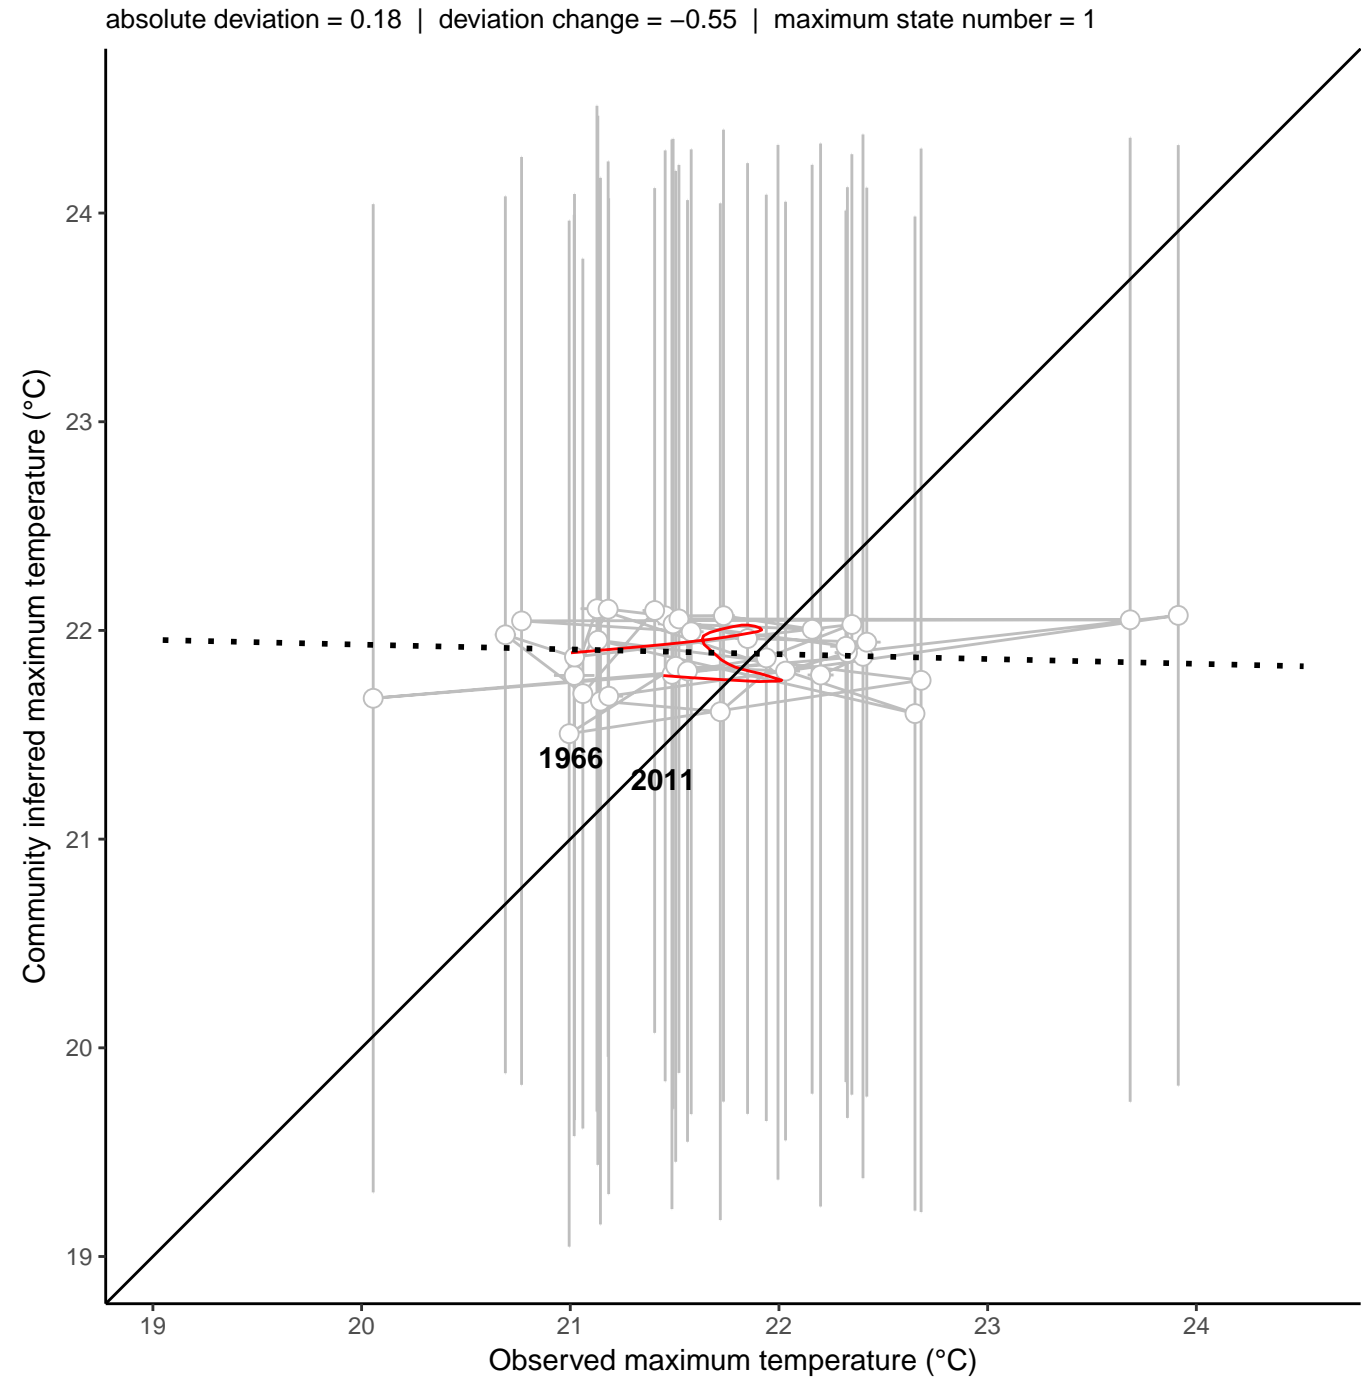

site : 840\_88\_42

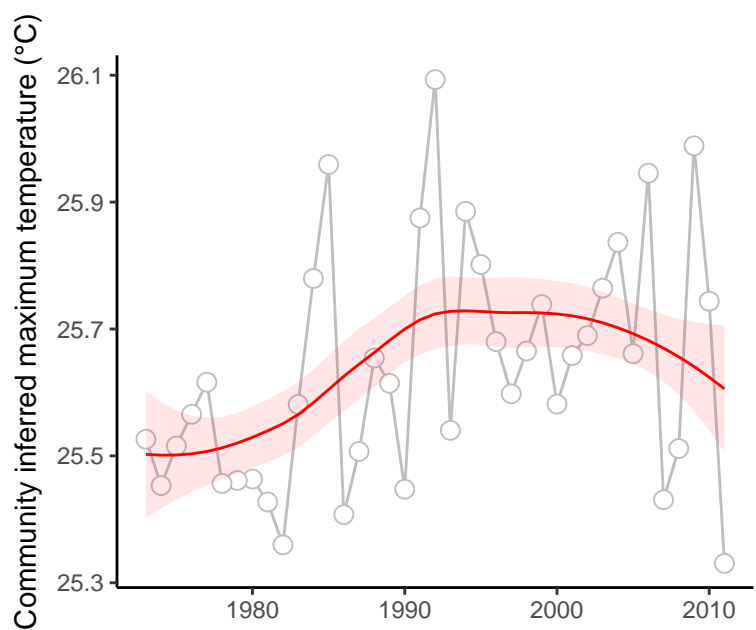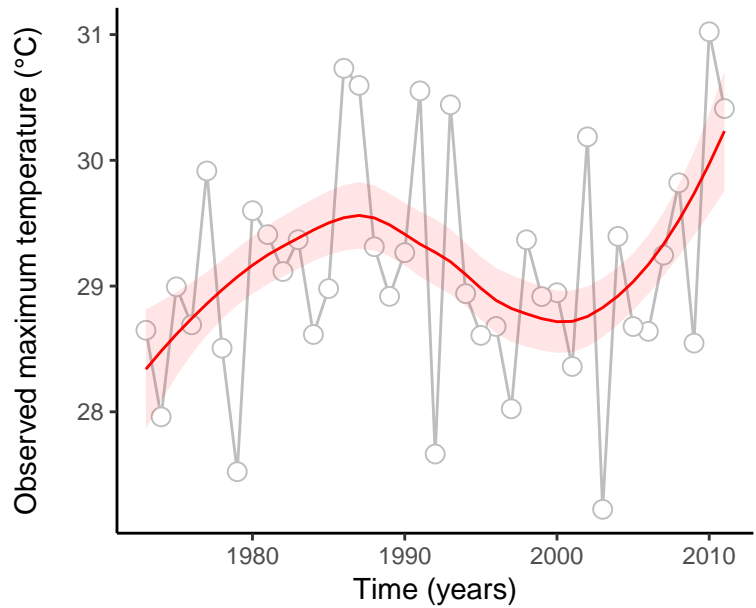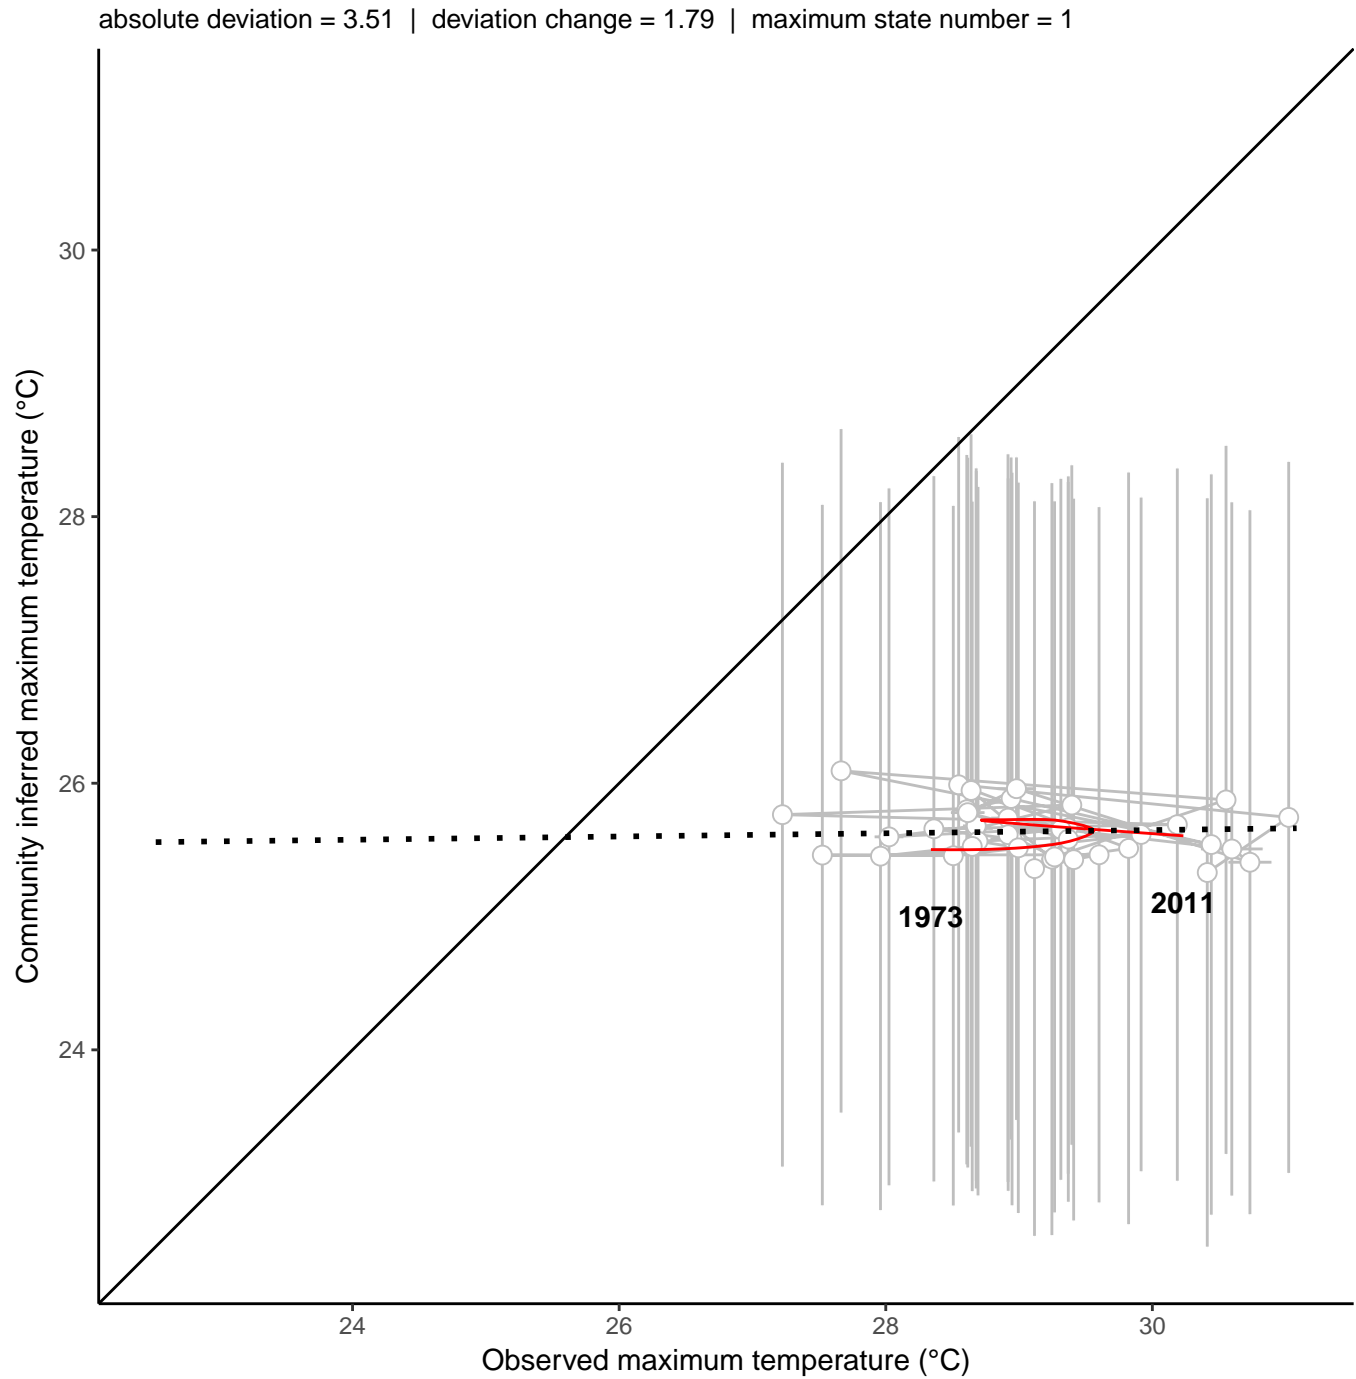

site : 840\_91\_24

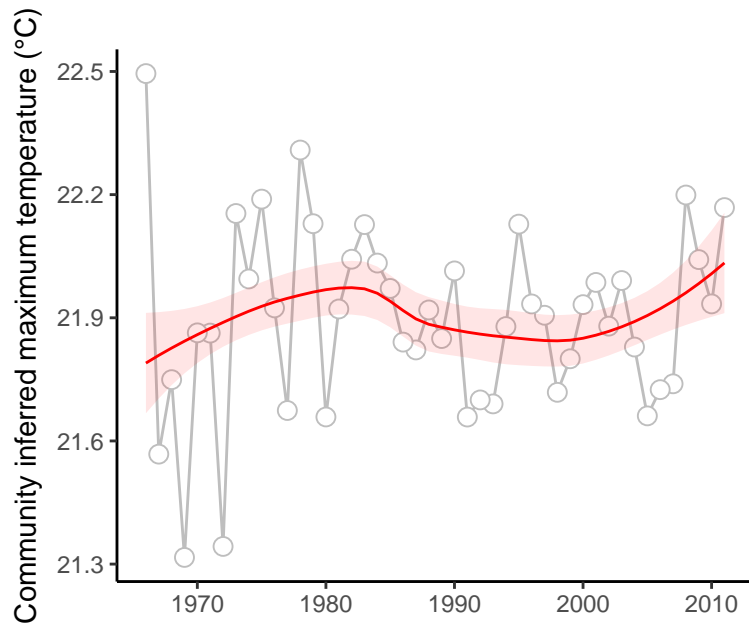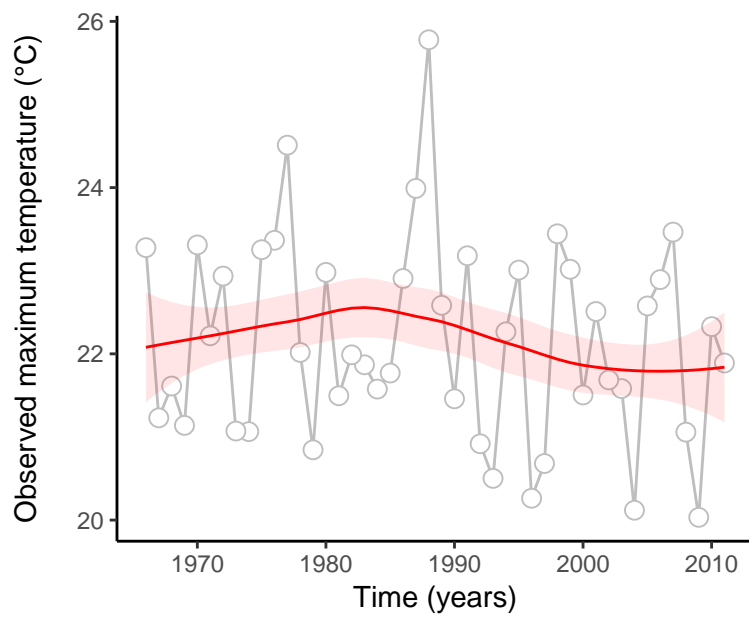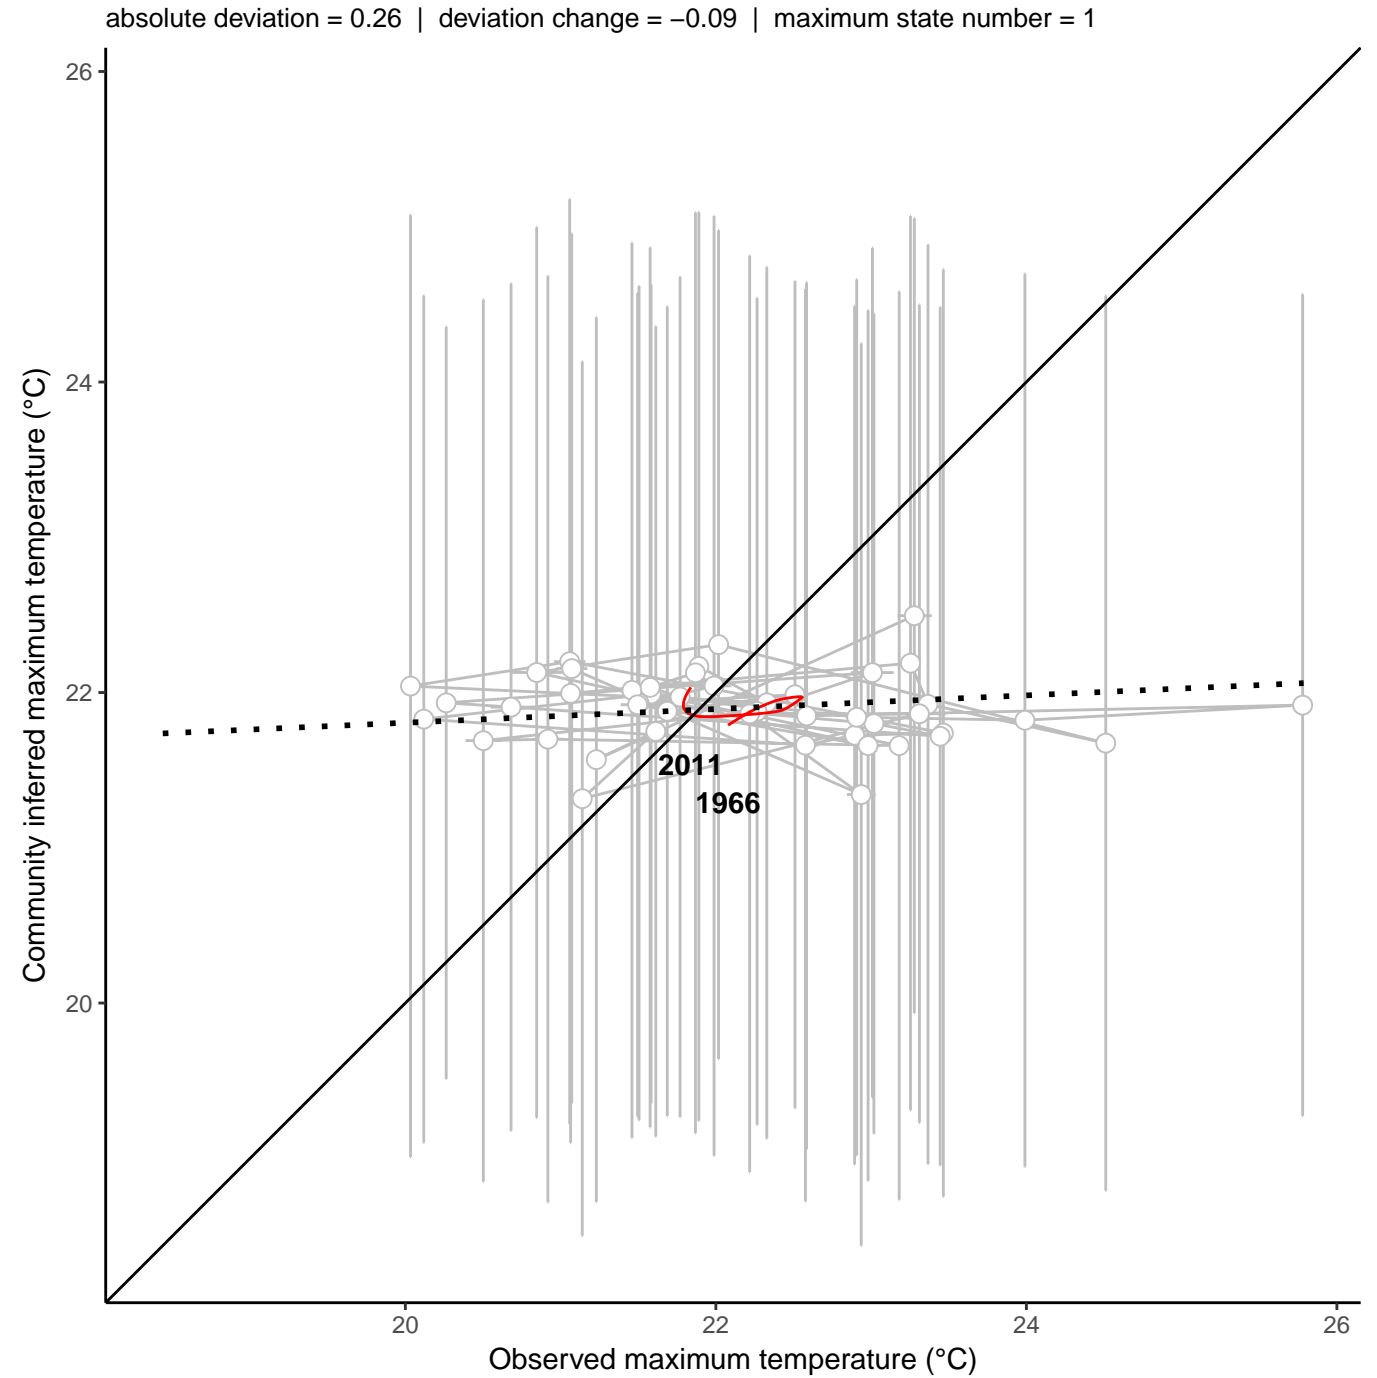

site : 840\_91\_58

absolute deviation = 1.69 | deviation change = 1.04 | maximum state number = 1

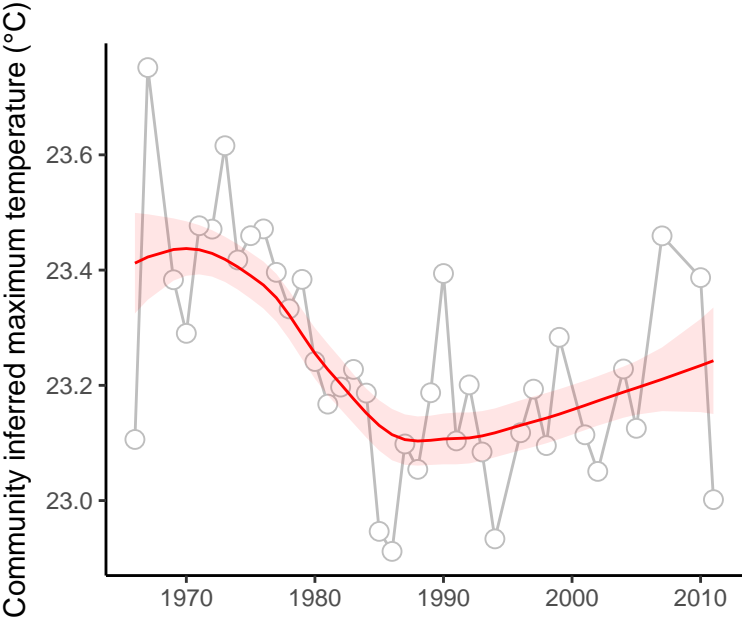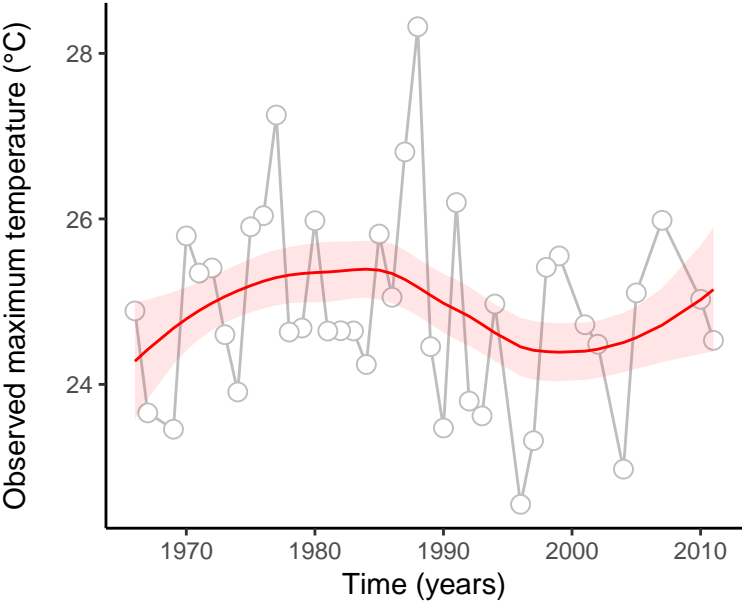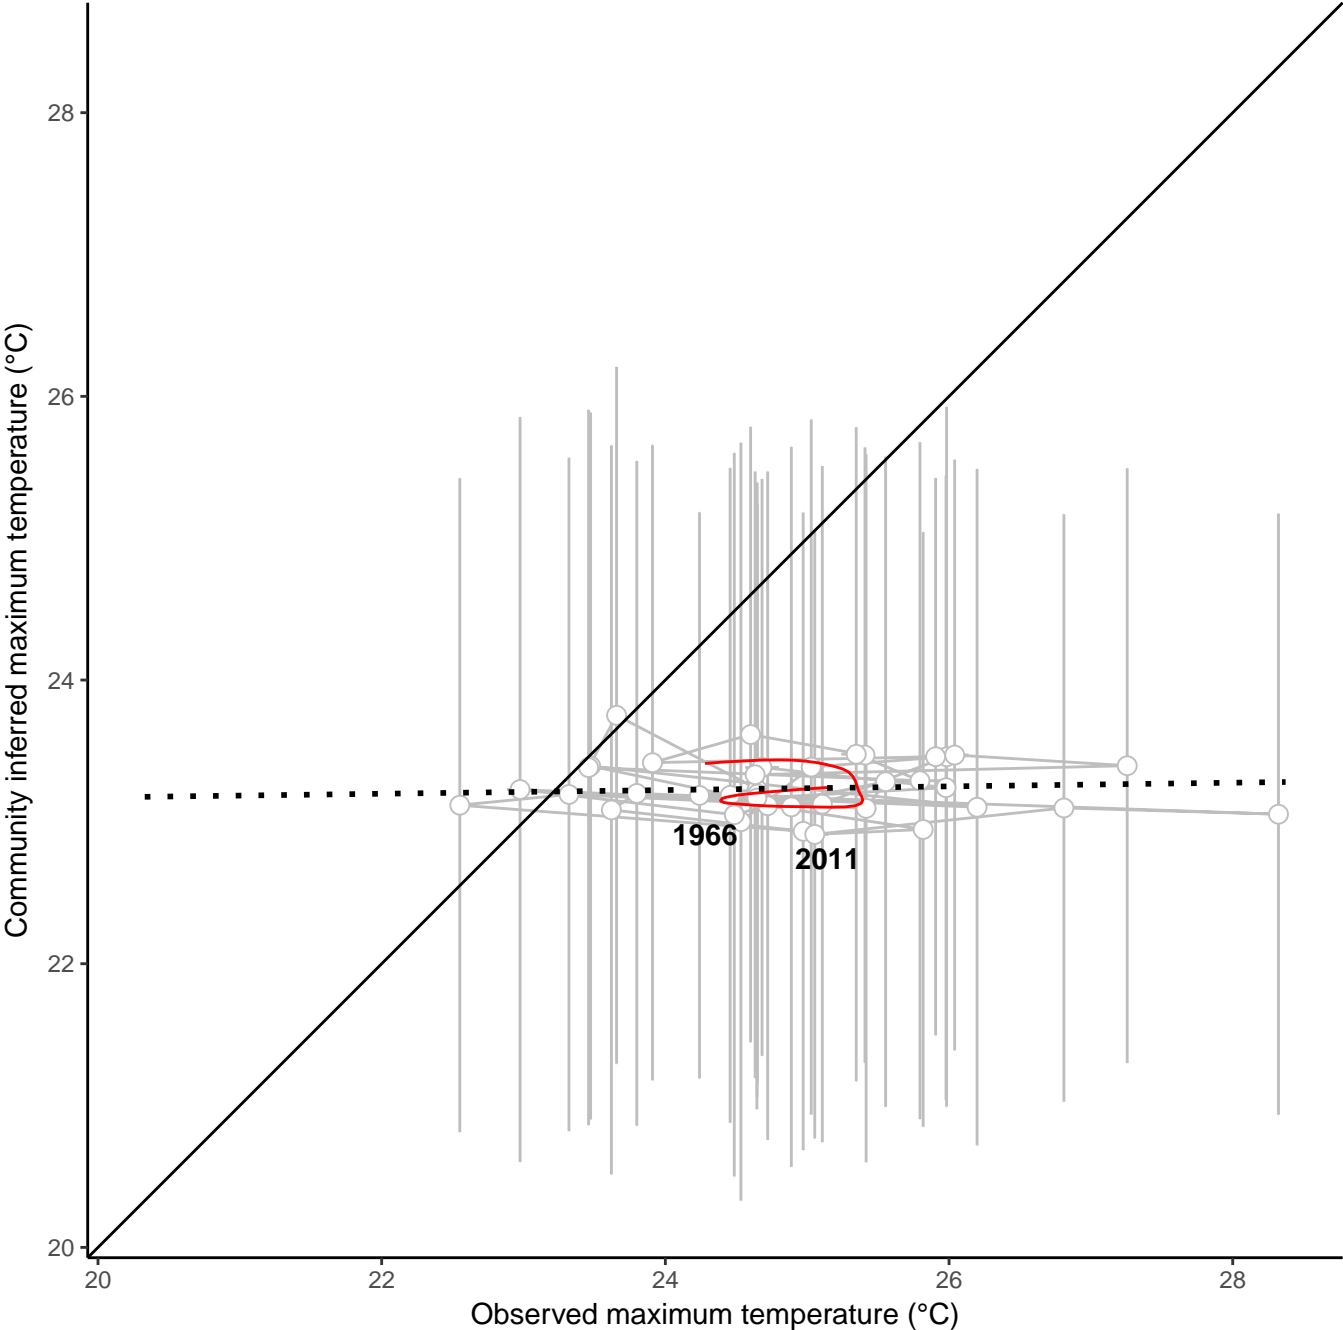

site : 840\_91\_63

absolute deviation = 1.05 | deviation change = 0.84 | maximum state number = 1

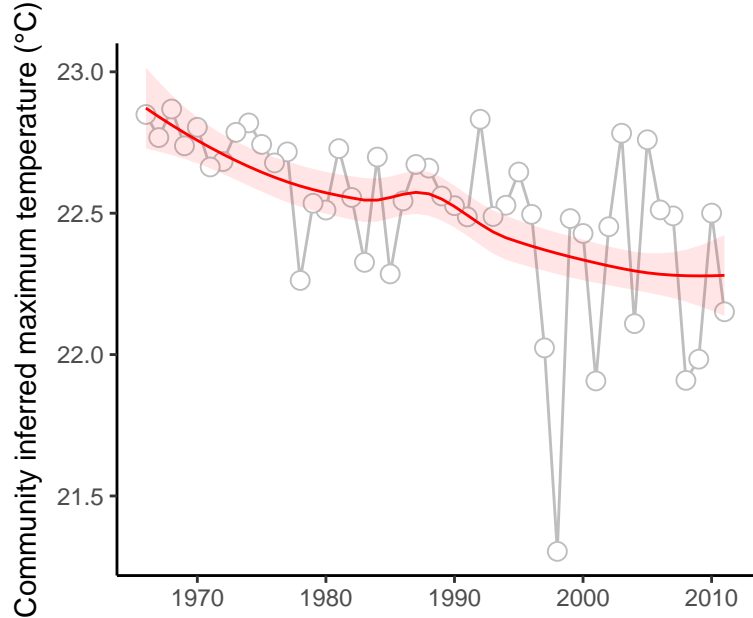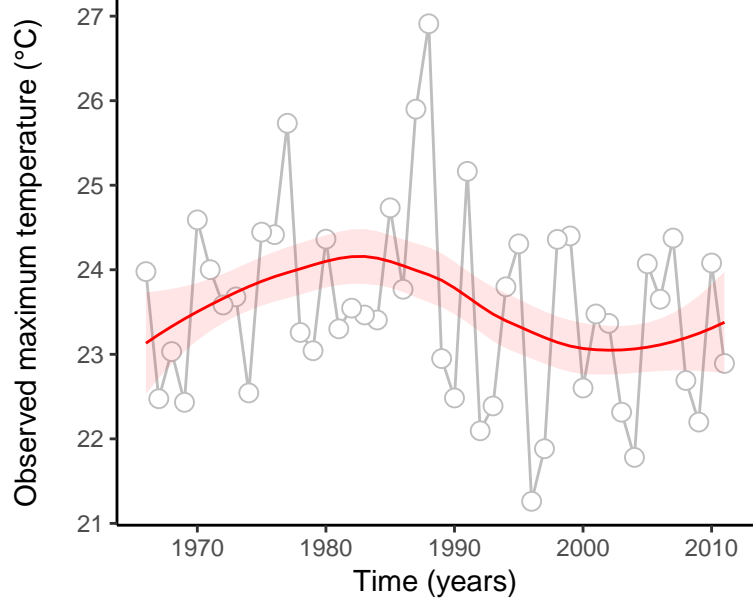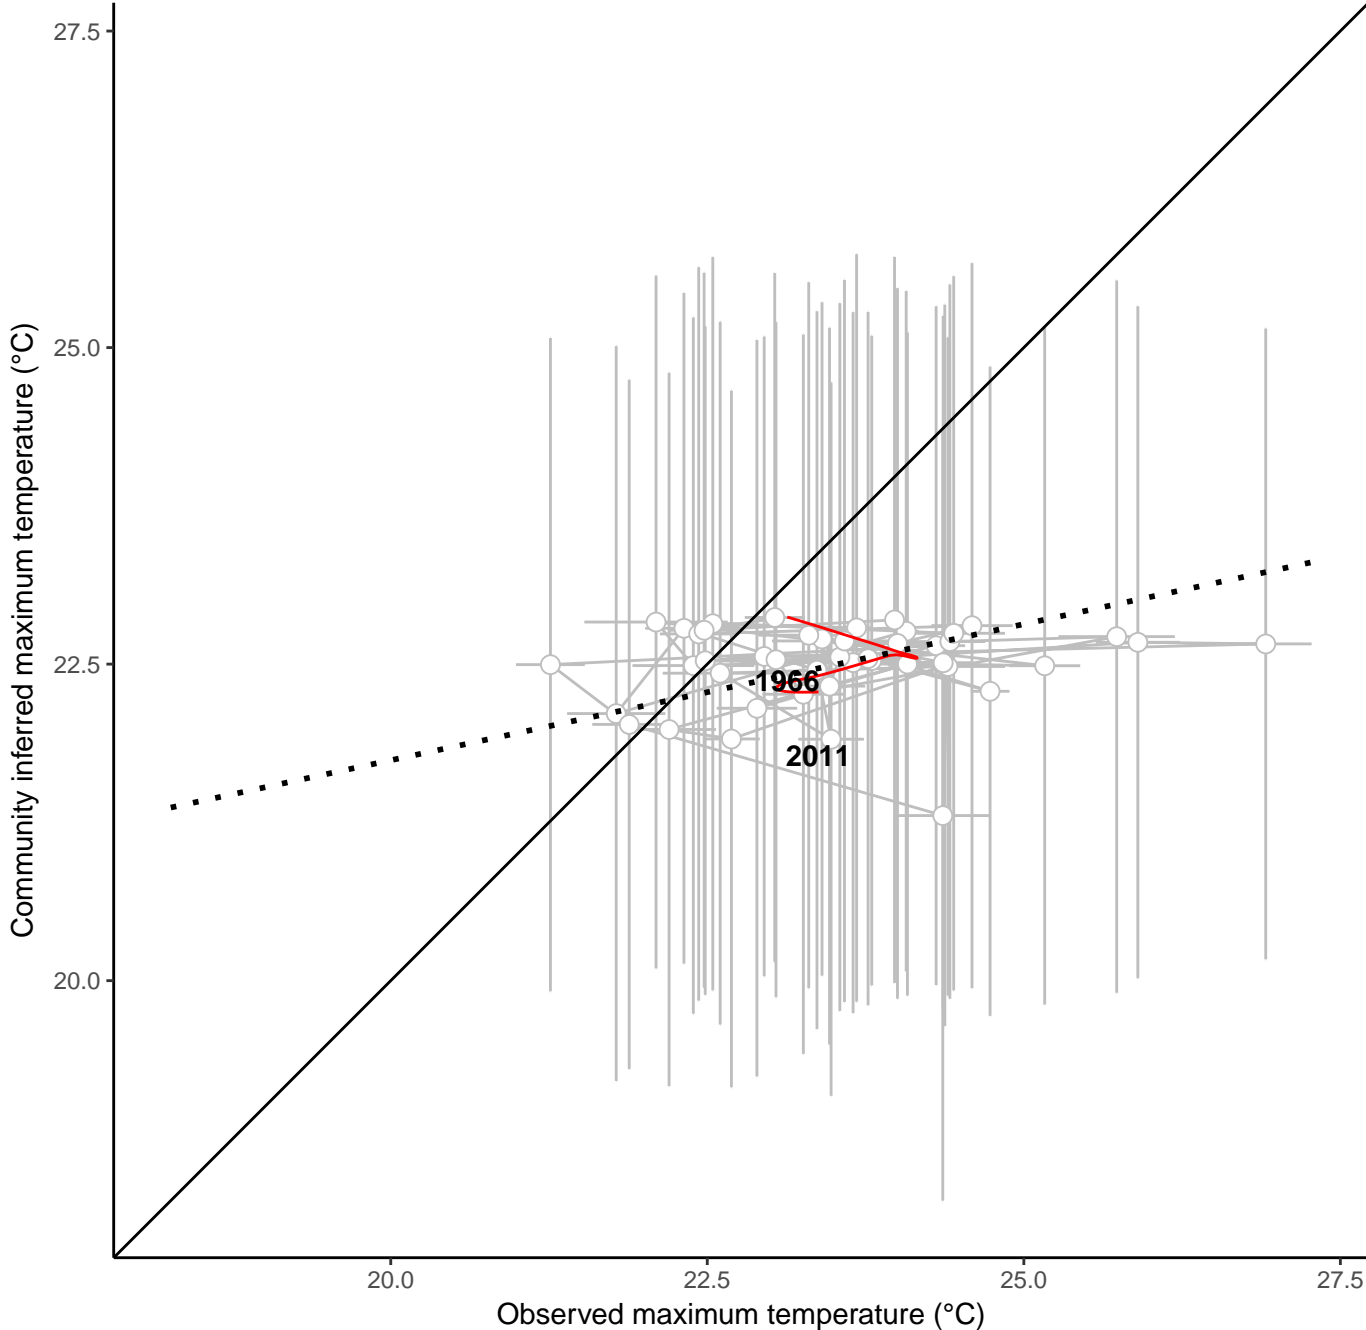



site : 840\_14\_14

absolute deviation = 2.05 | deviation change = -1.07 | maximum state number = 1

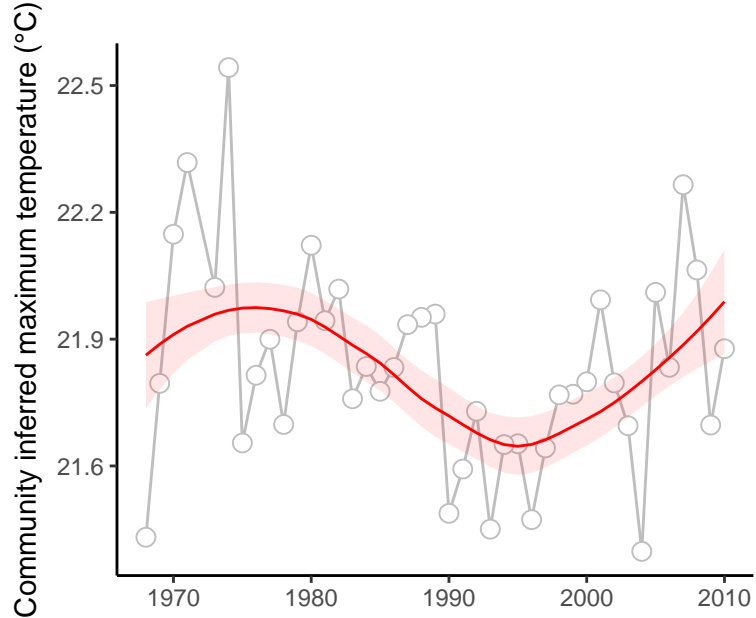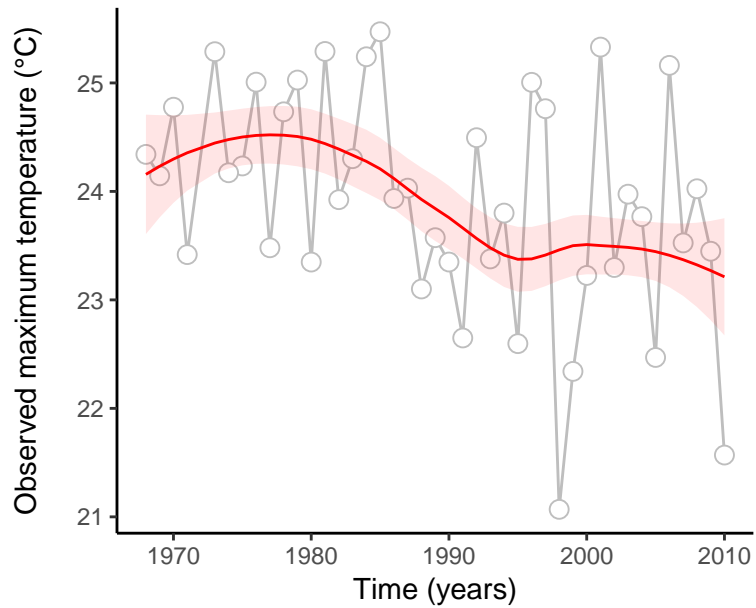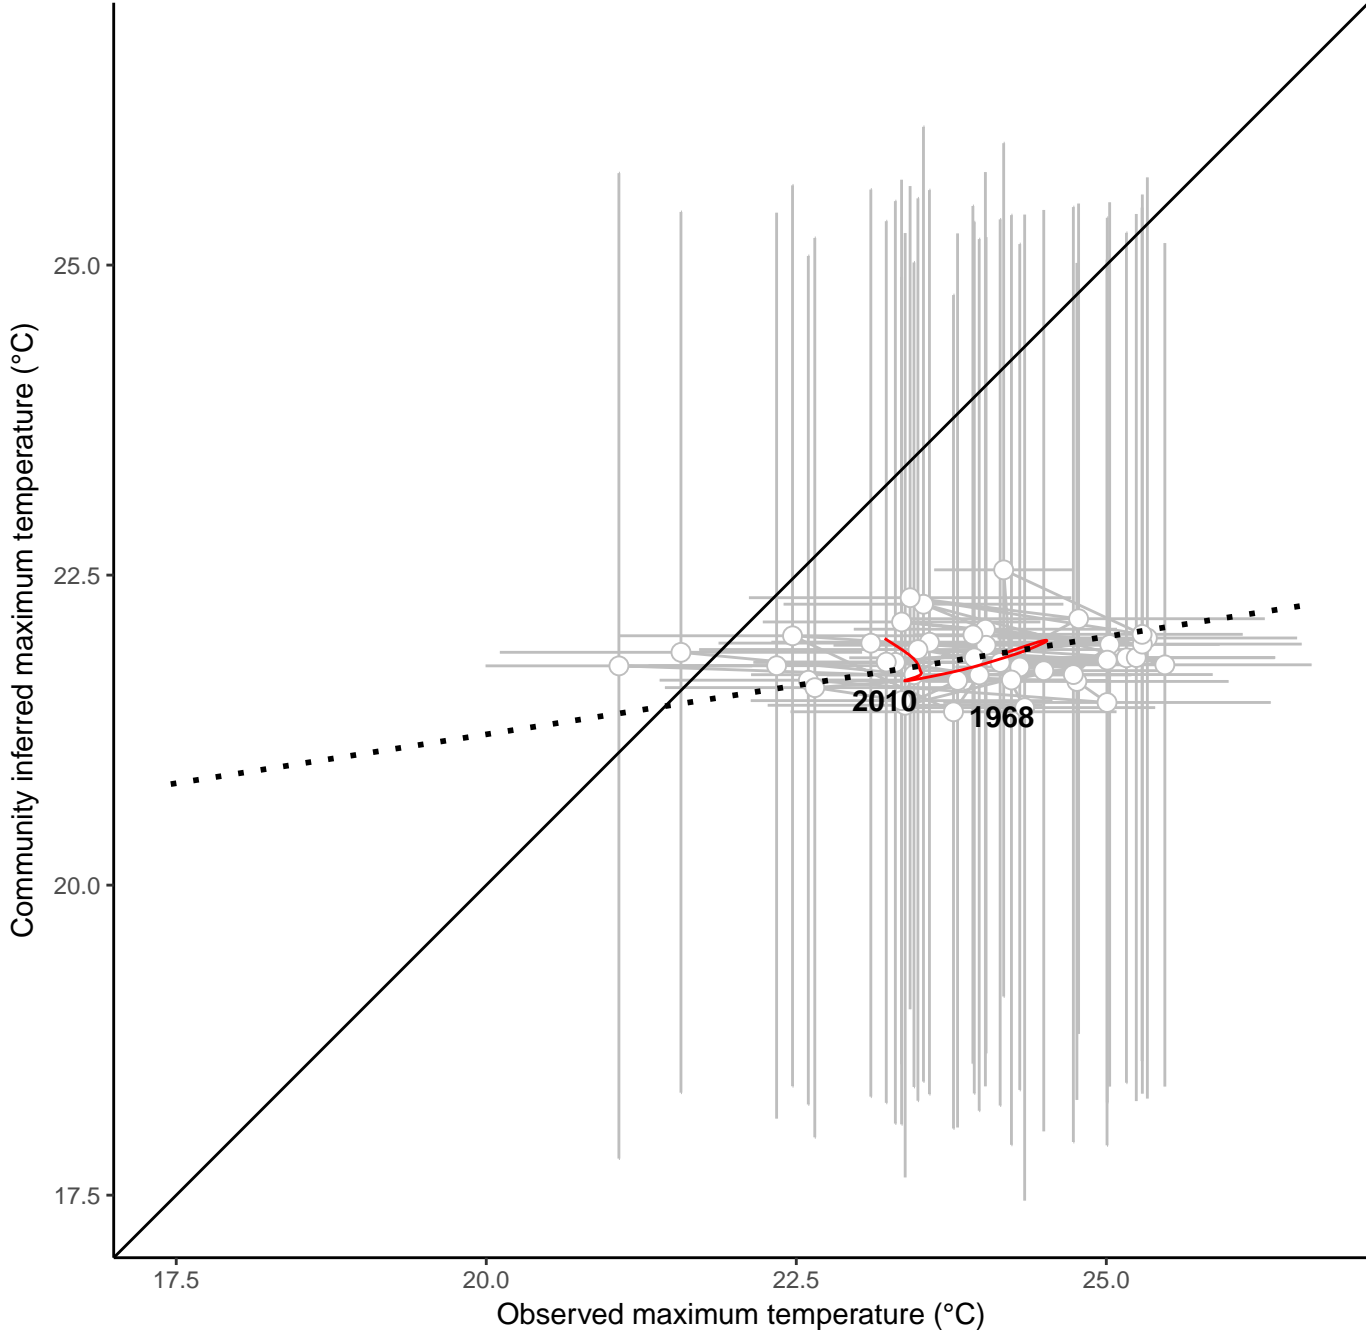

site : 840\_34\_1

absolute deviation = 2.07 | deviation change = 1.97 | maximum state number = 1

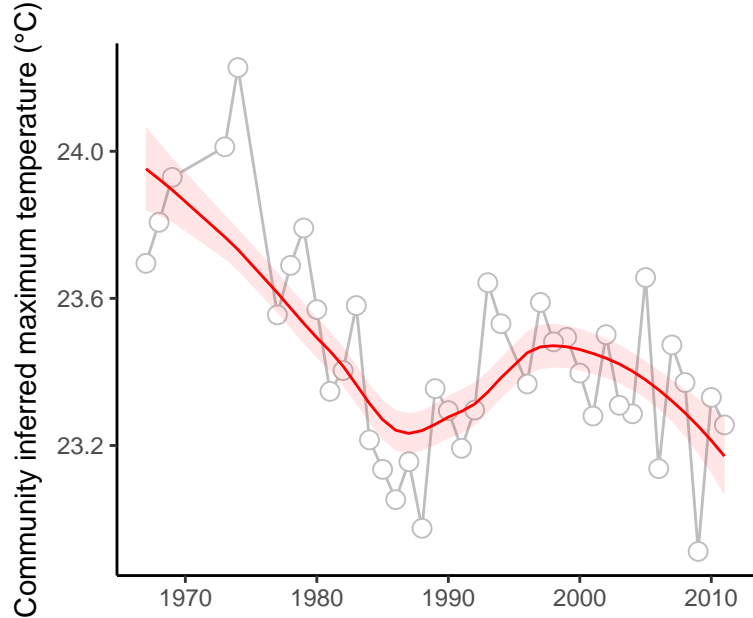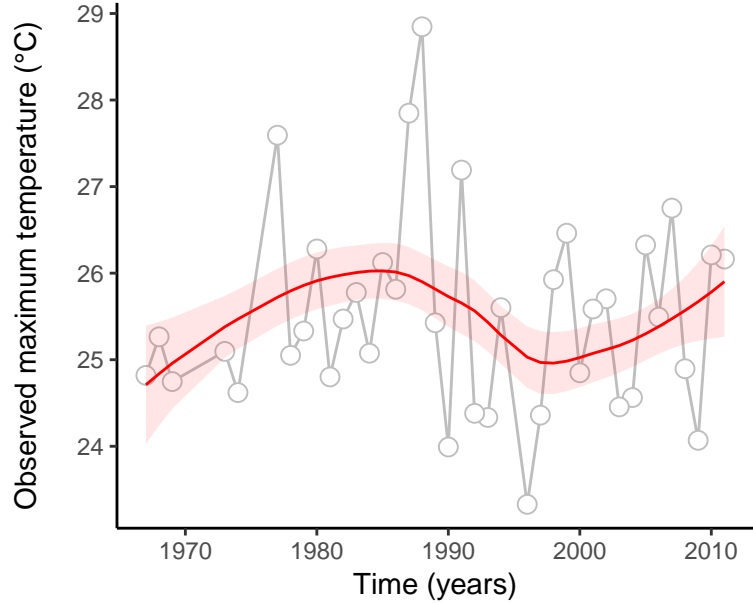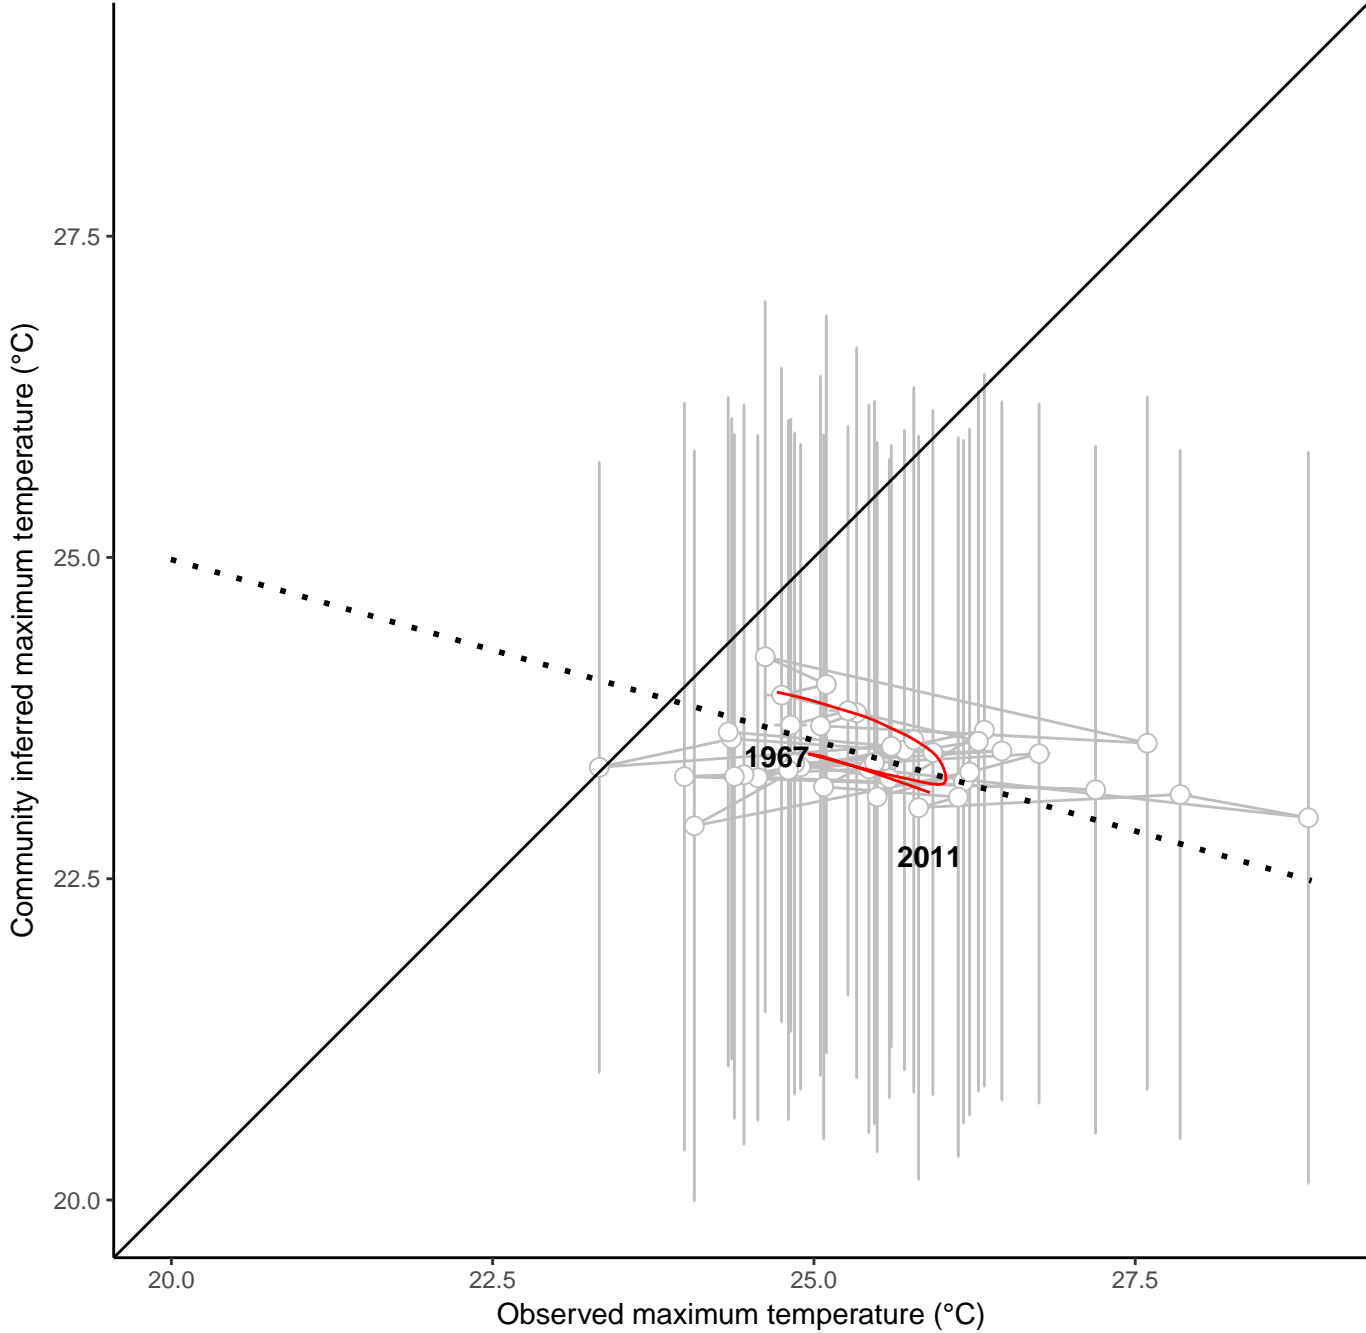

site : 840\_46\_44

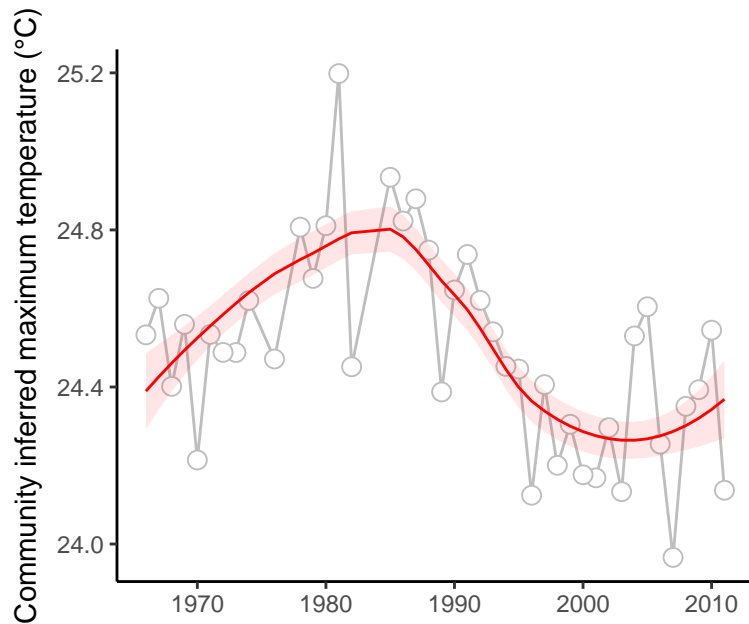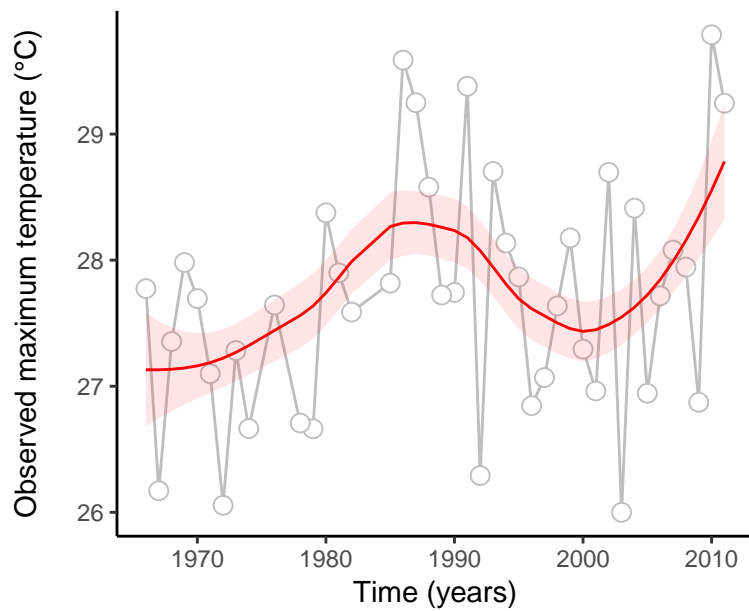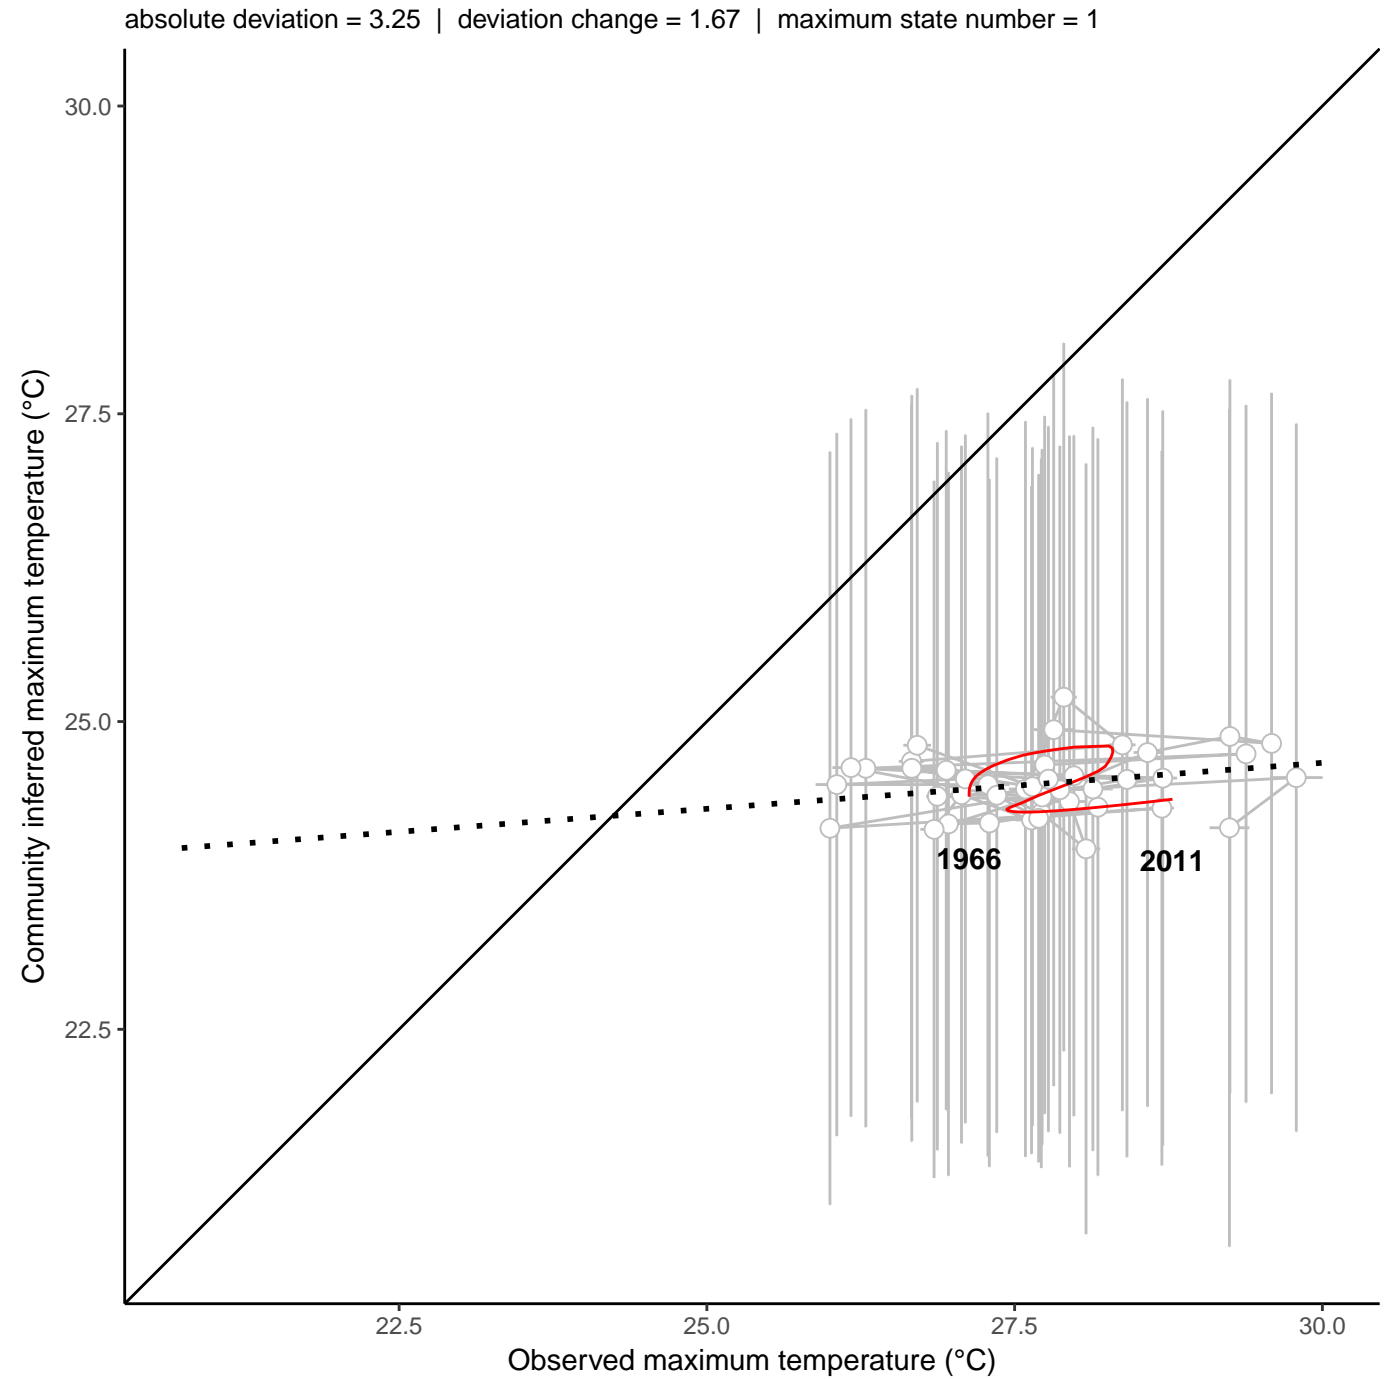

site : 840\_49\_54

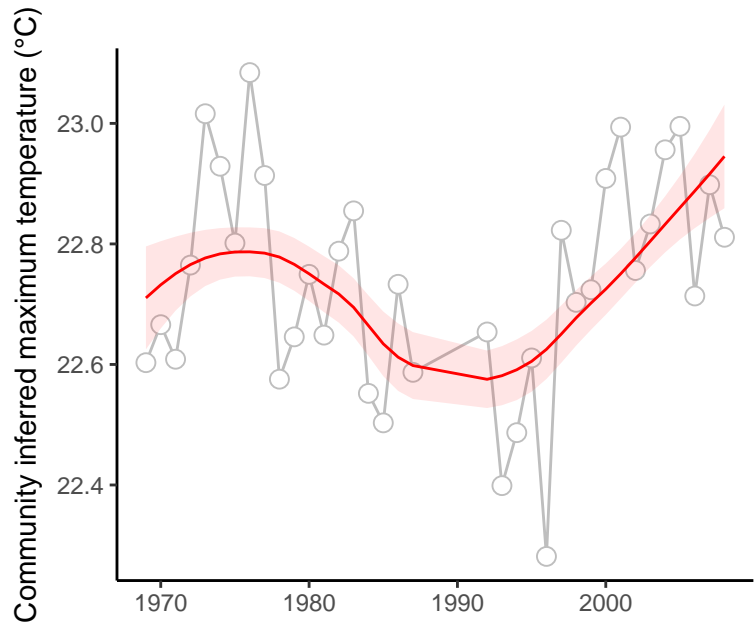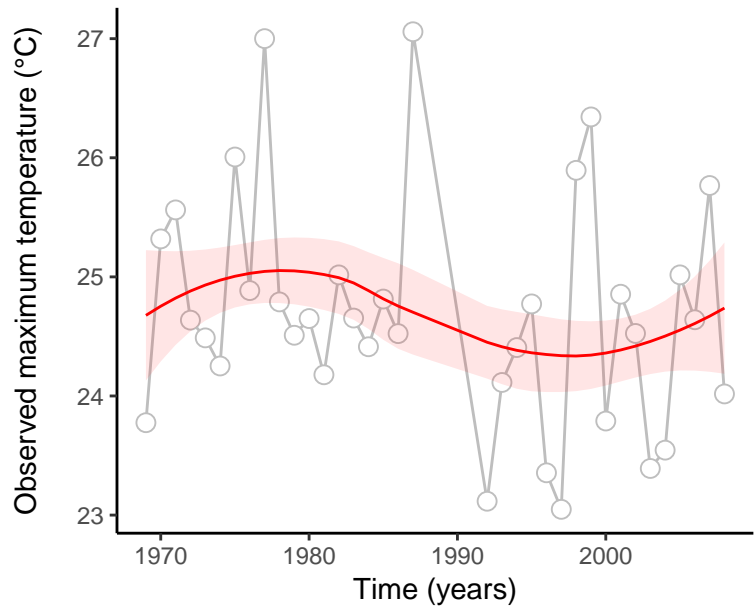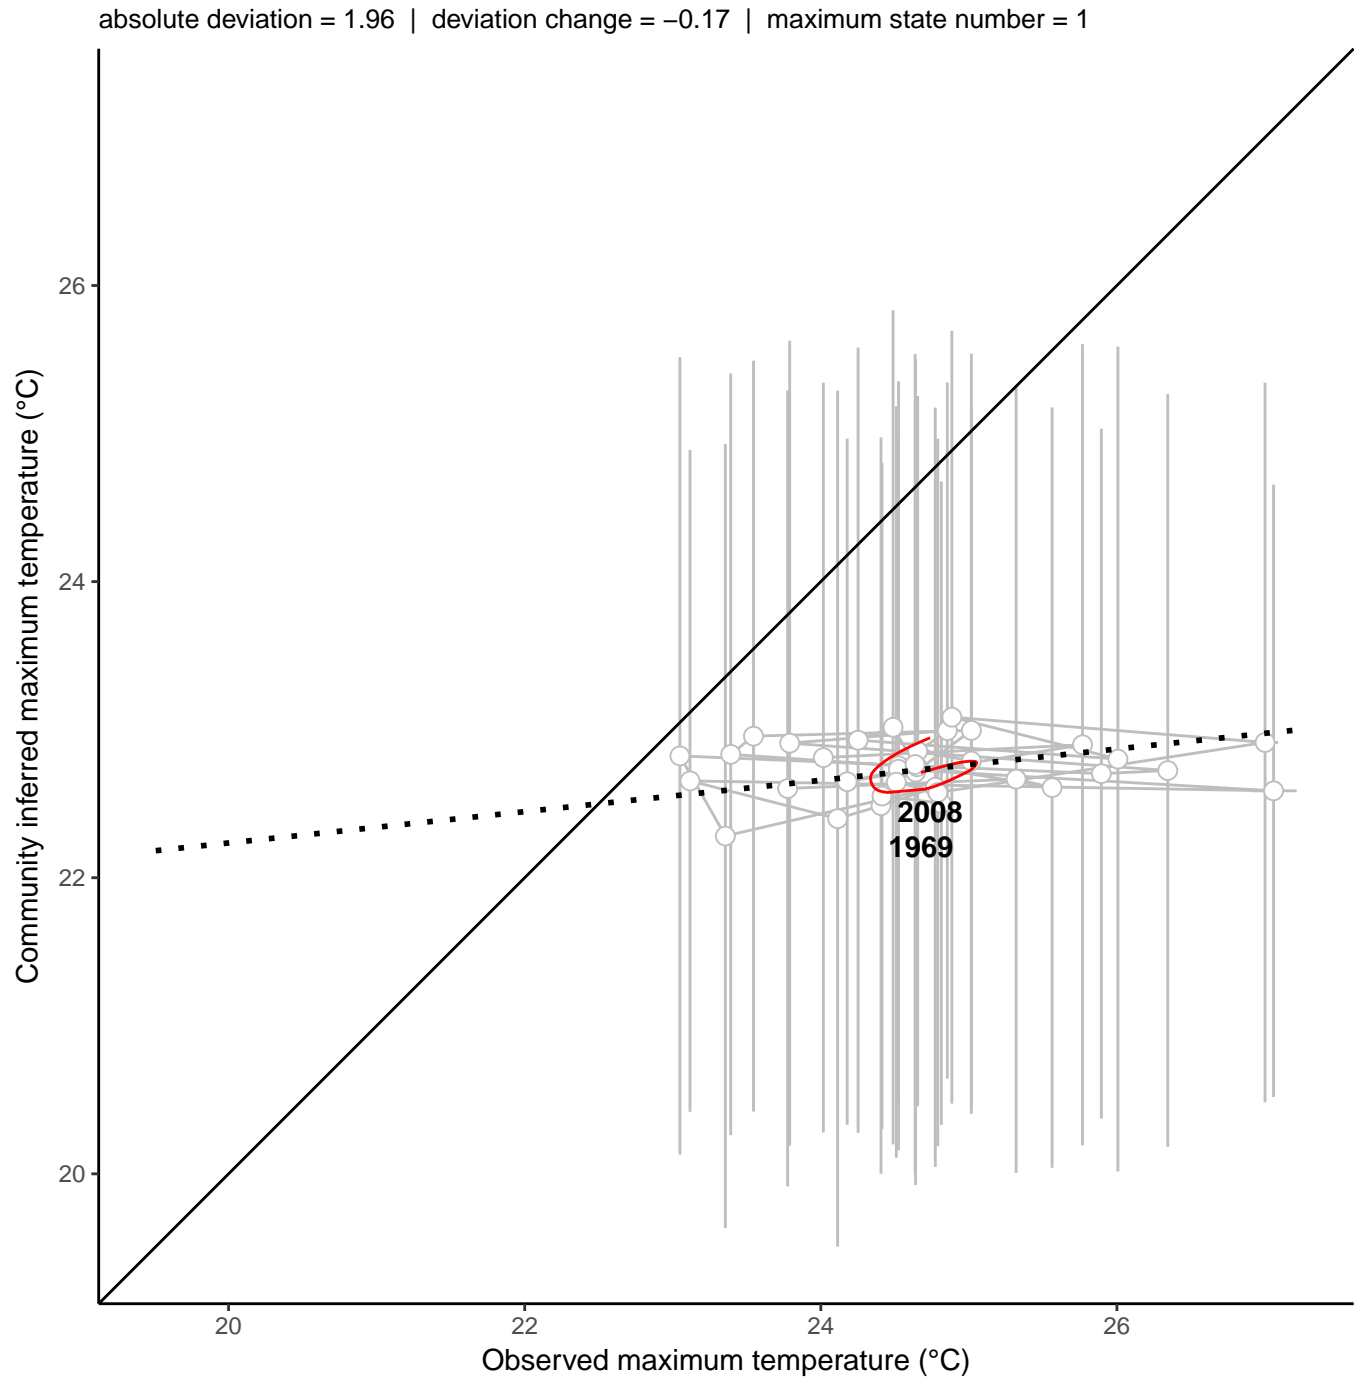

site : 840\_52\_8

absolute deviation = 3.18 | deviation change = 0.64 | maximum state number = 1

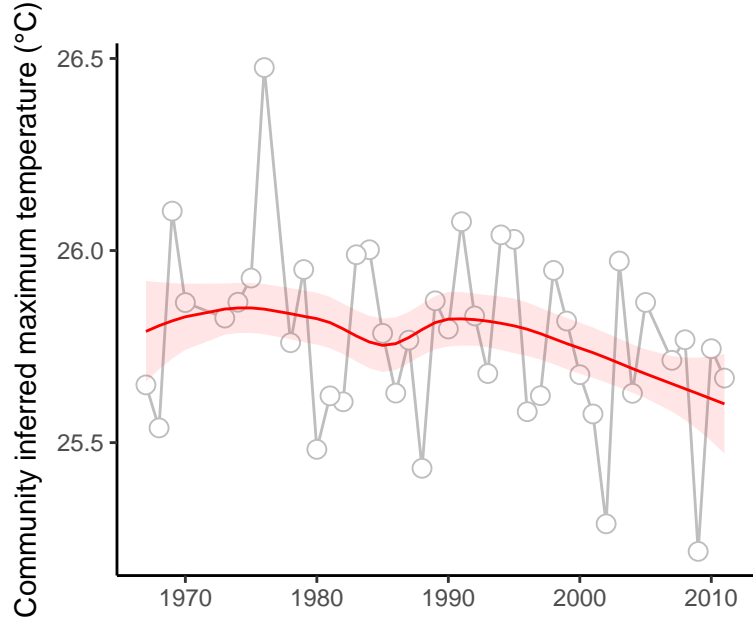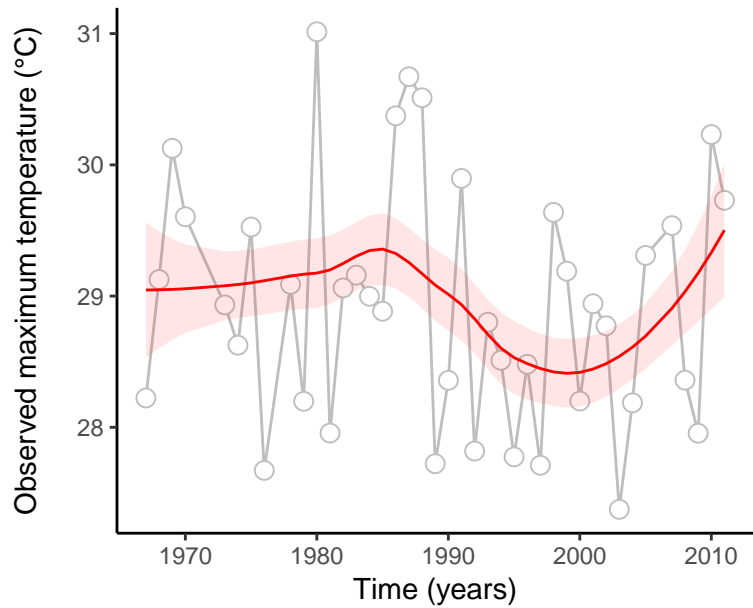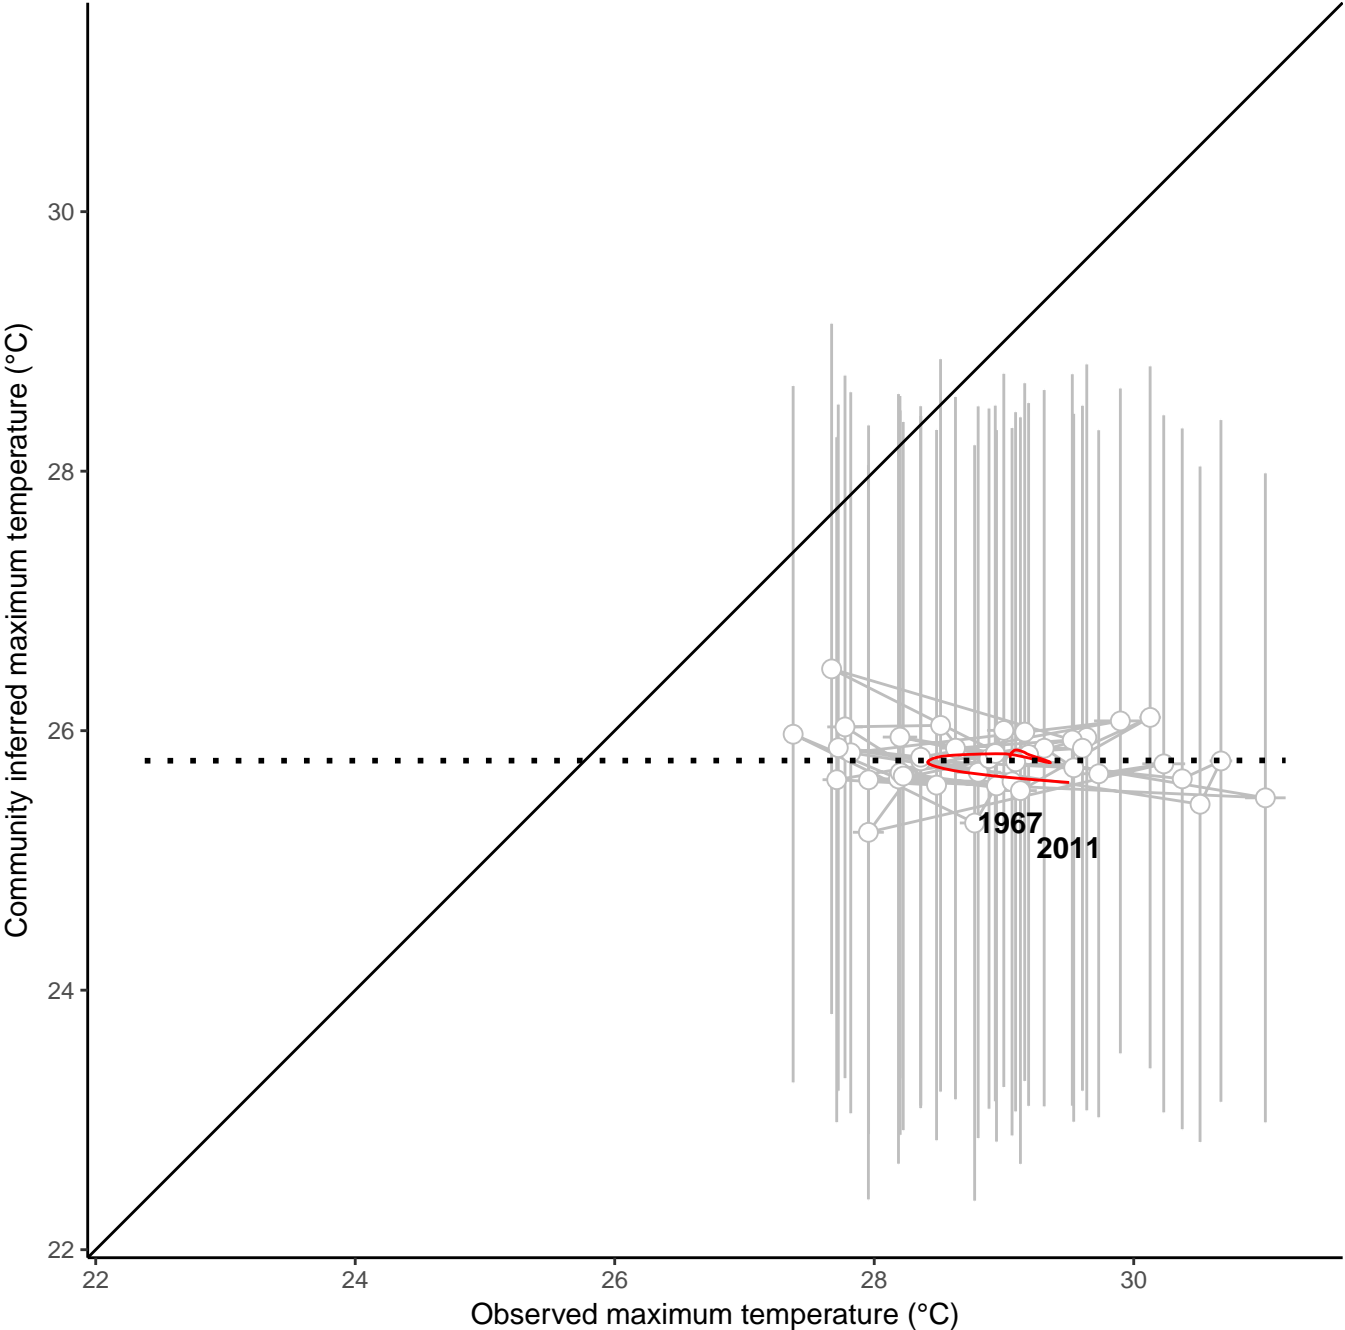

site : 840\_61\_43

absolute deviation = 0.12 | deviation change = -0.25 | maximum state number = 1

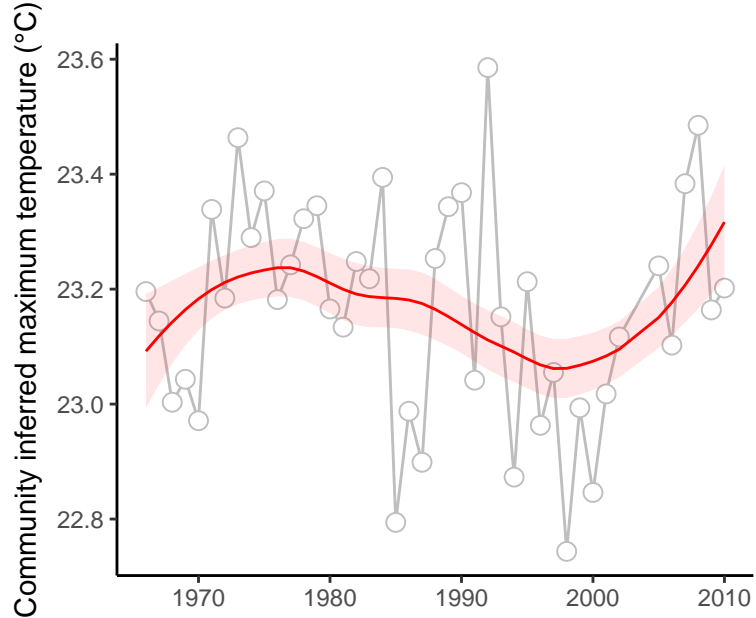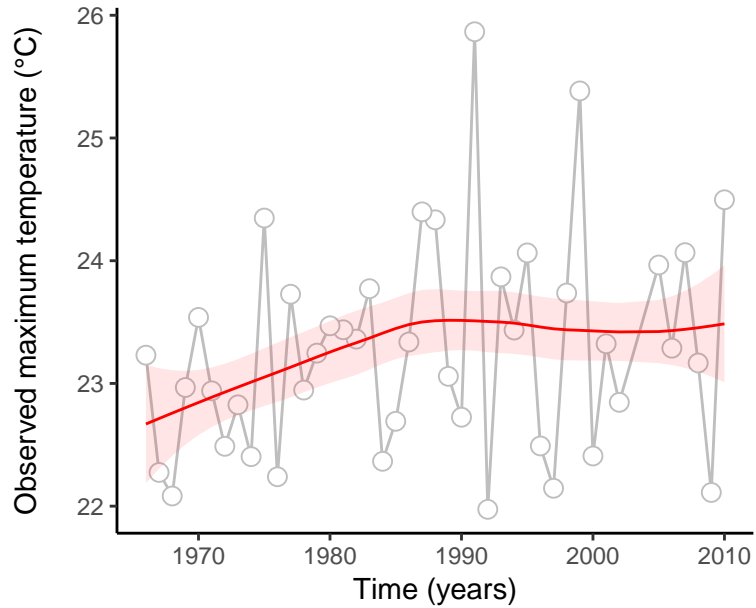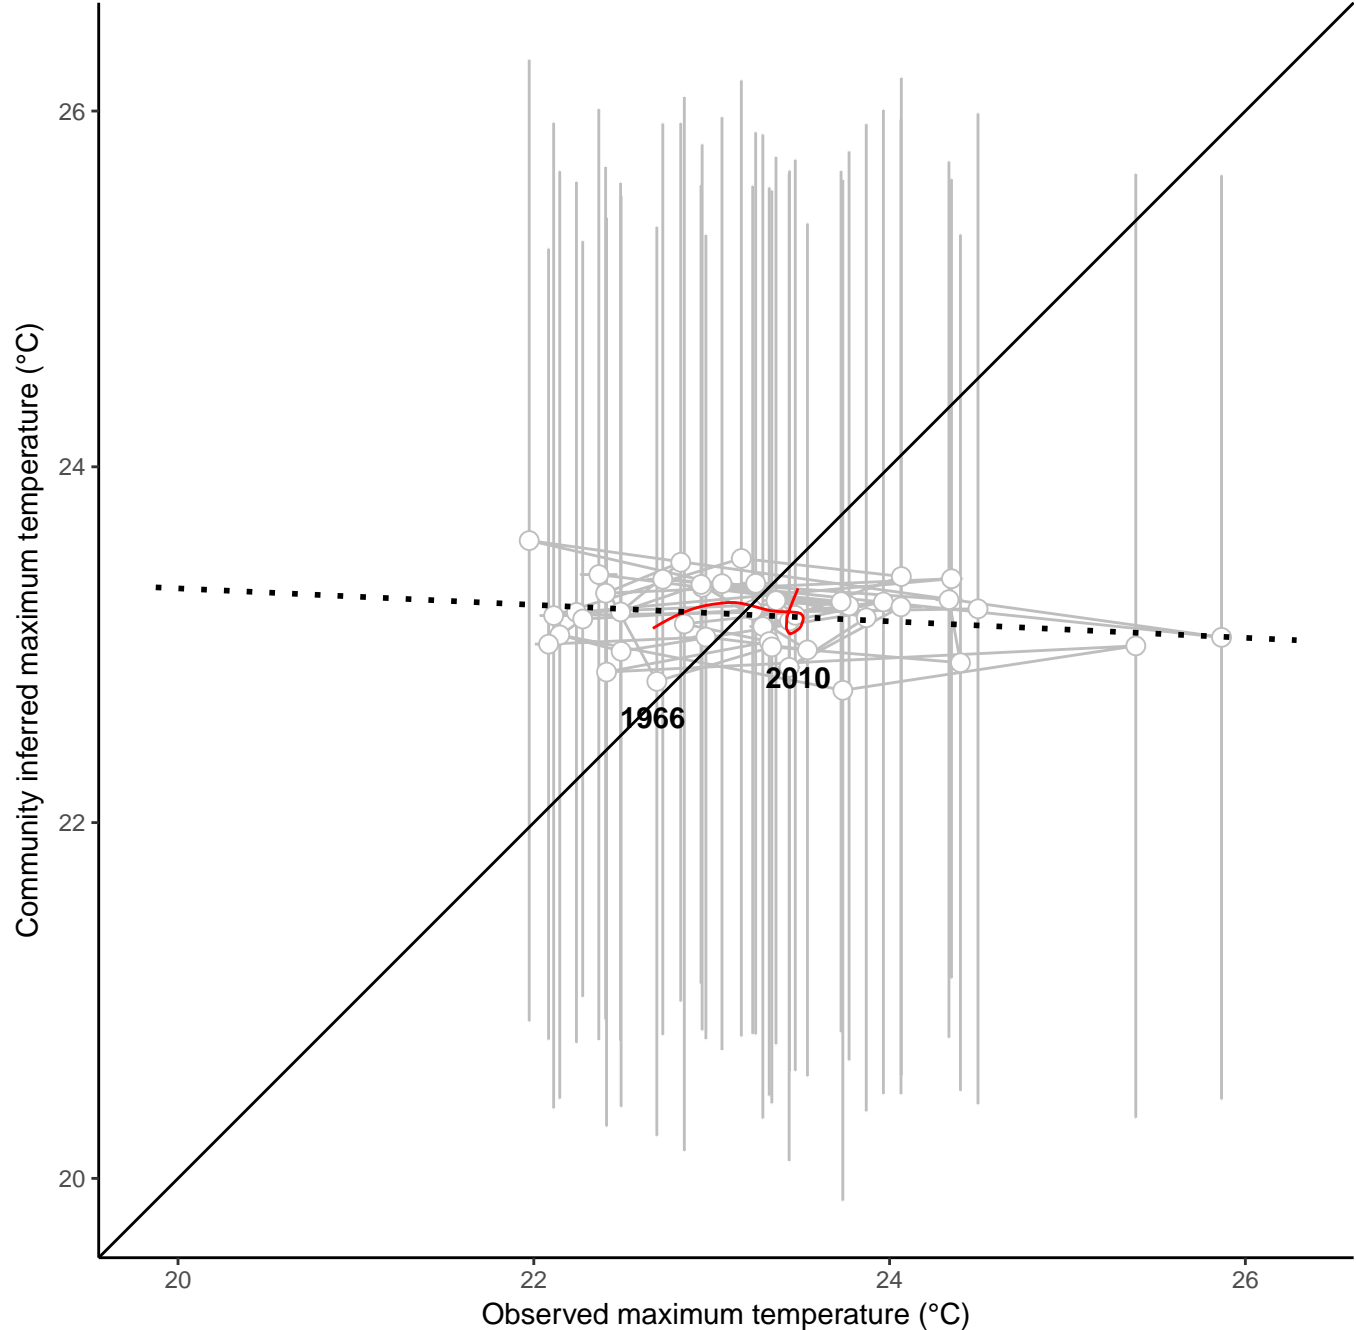

site : 840\_61\_58

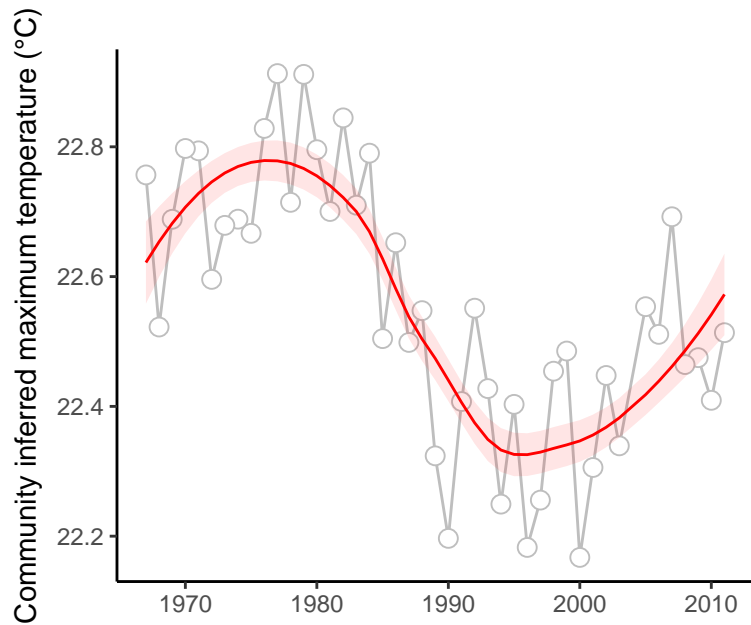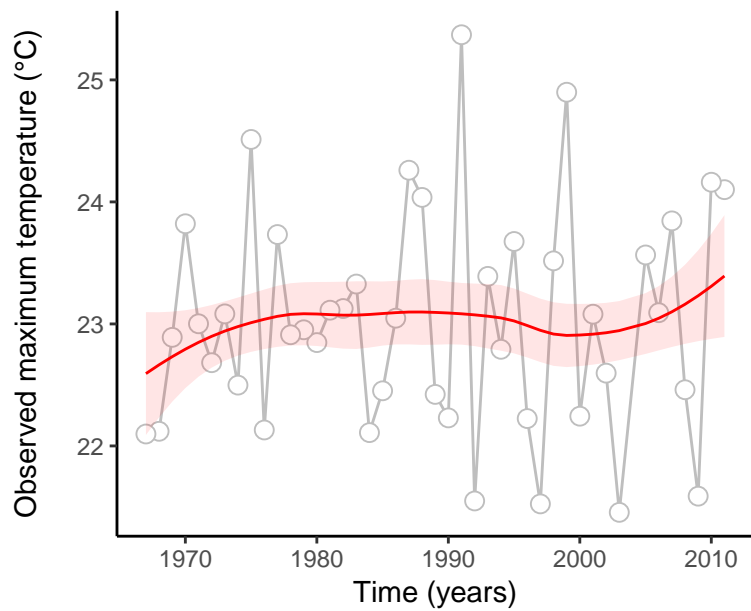

absolute deviation = 0.46 | deviation change = 0.79 | maximum state number = 1

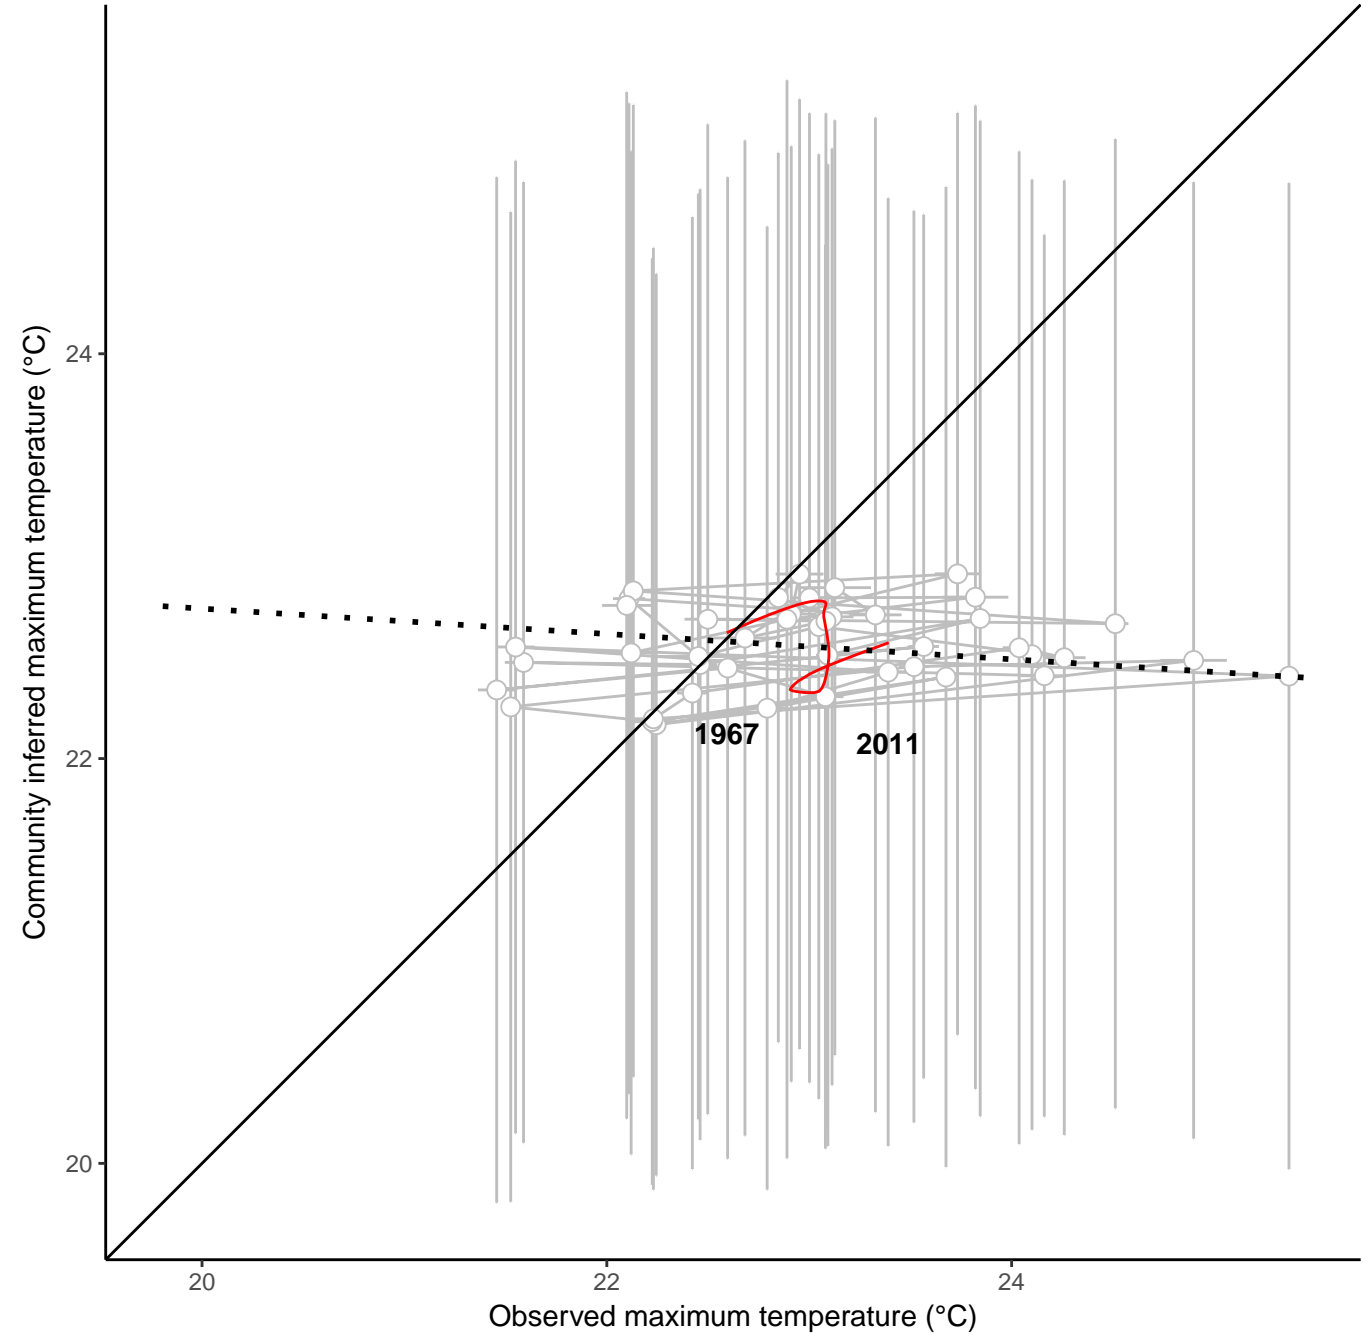

site : 840\_64\_8

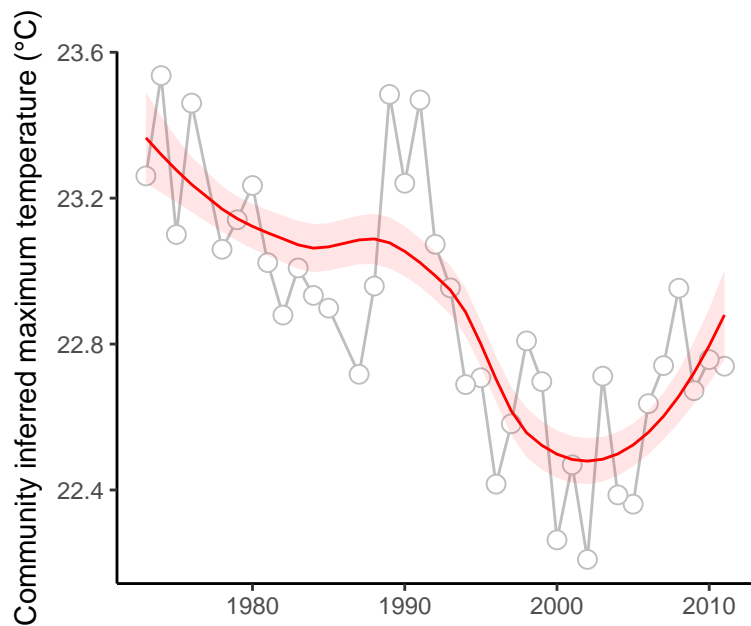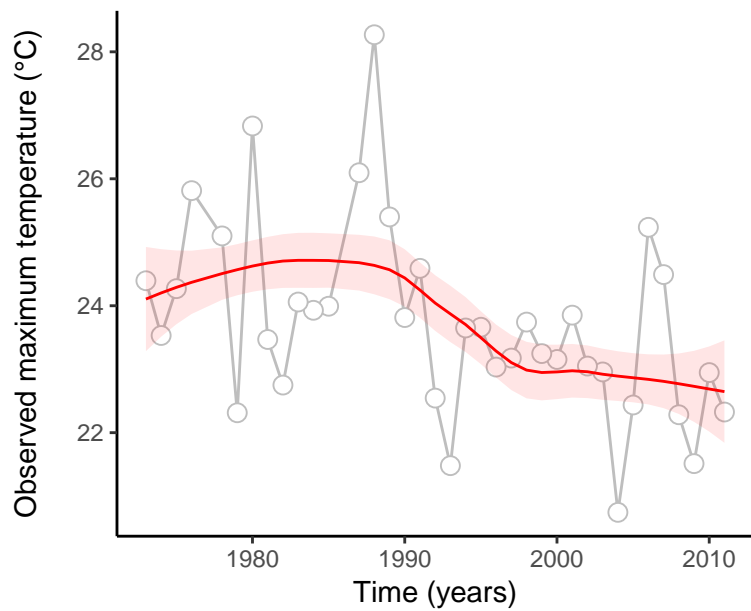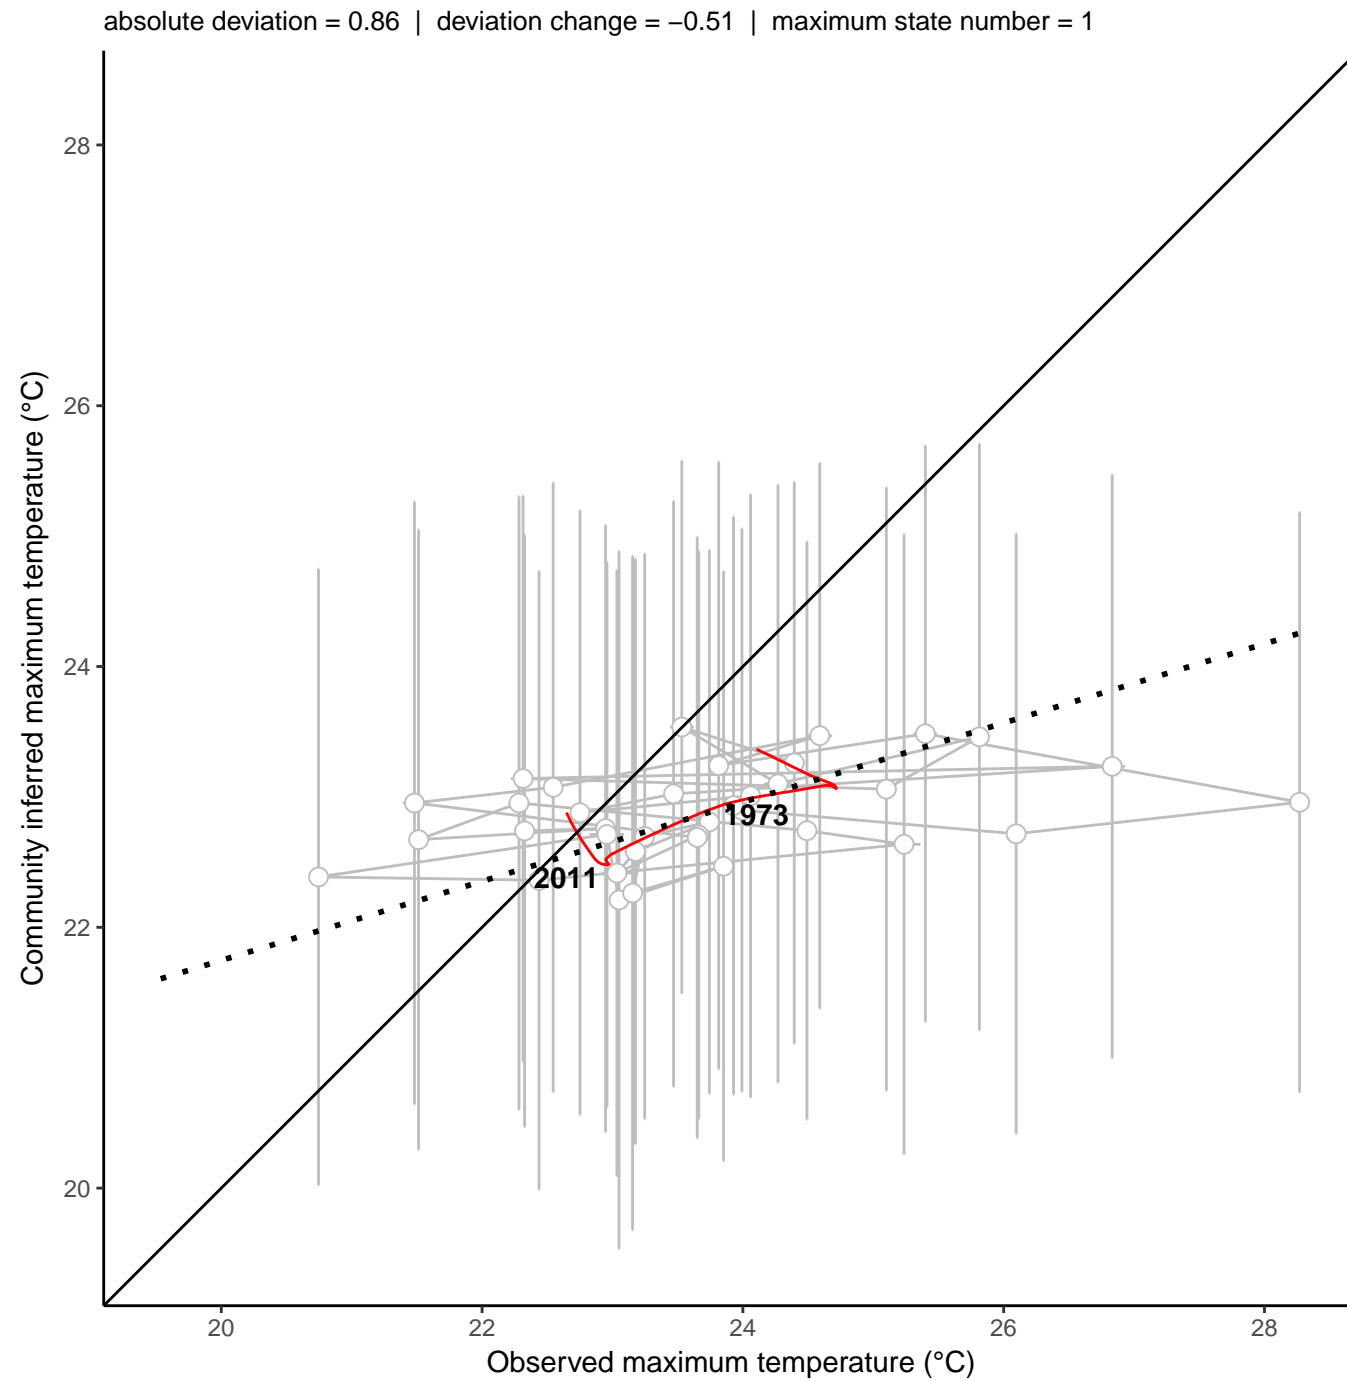



site : 840\_82\_41

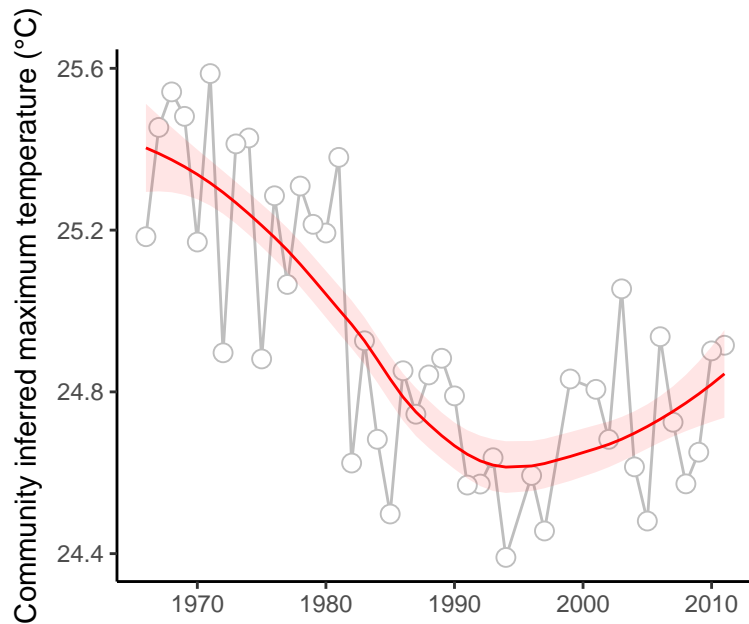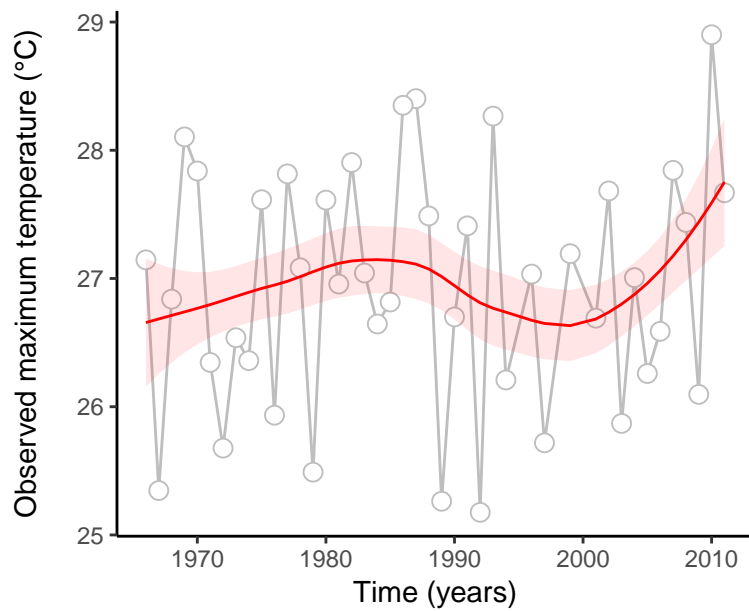

absolute deviation = 2.04 | deviation change = 1.65 | maximum state number = 2

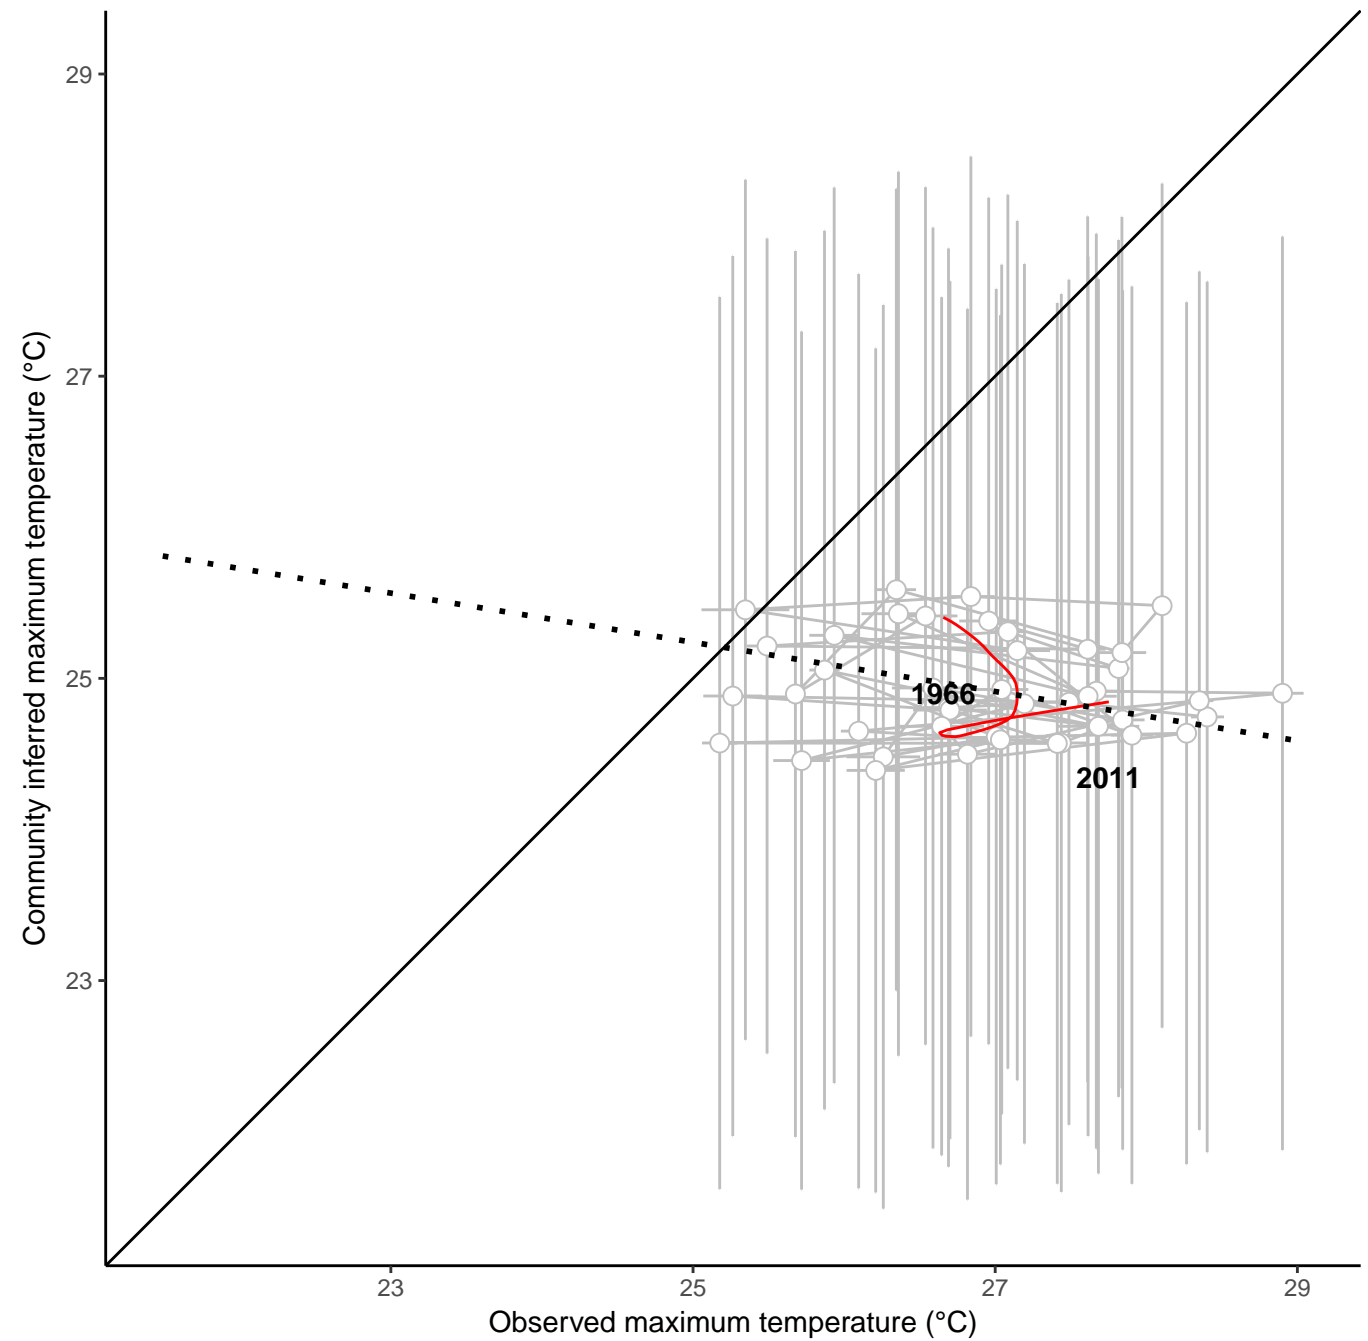

site : 840\_83\_9

absolute deviation = 6.33 | deviation change = -0.03 | maximum state number = 1

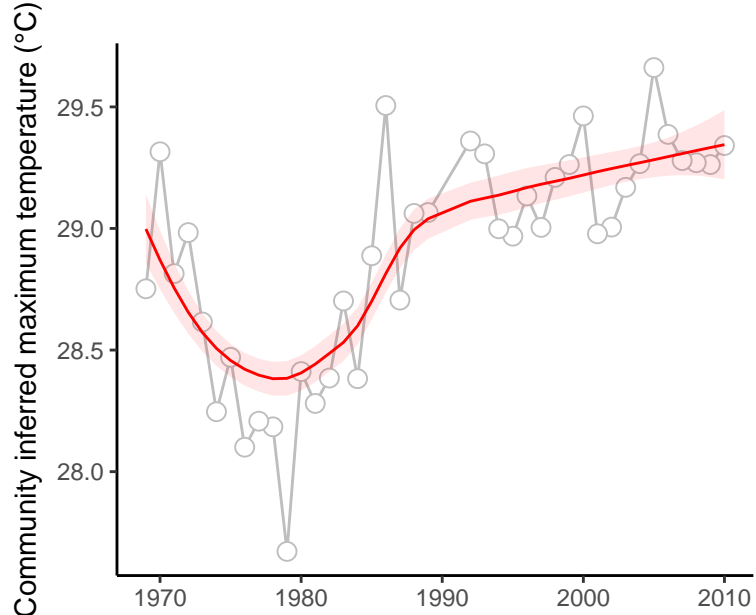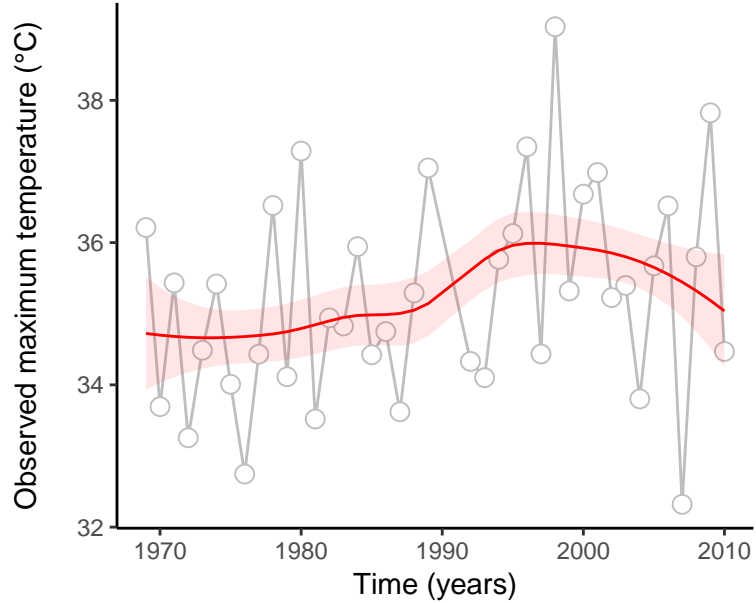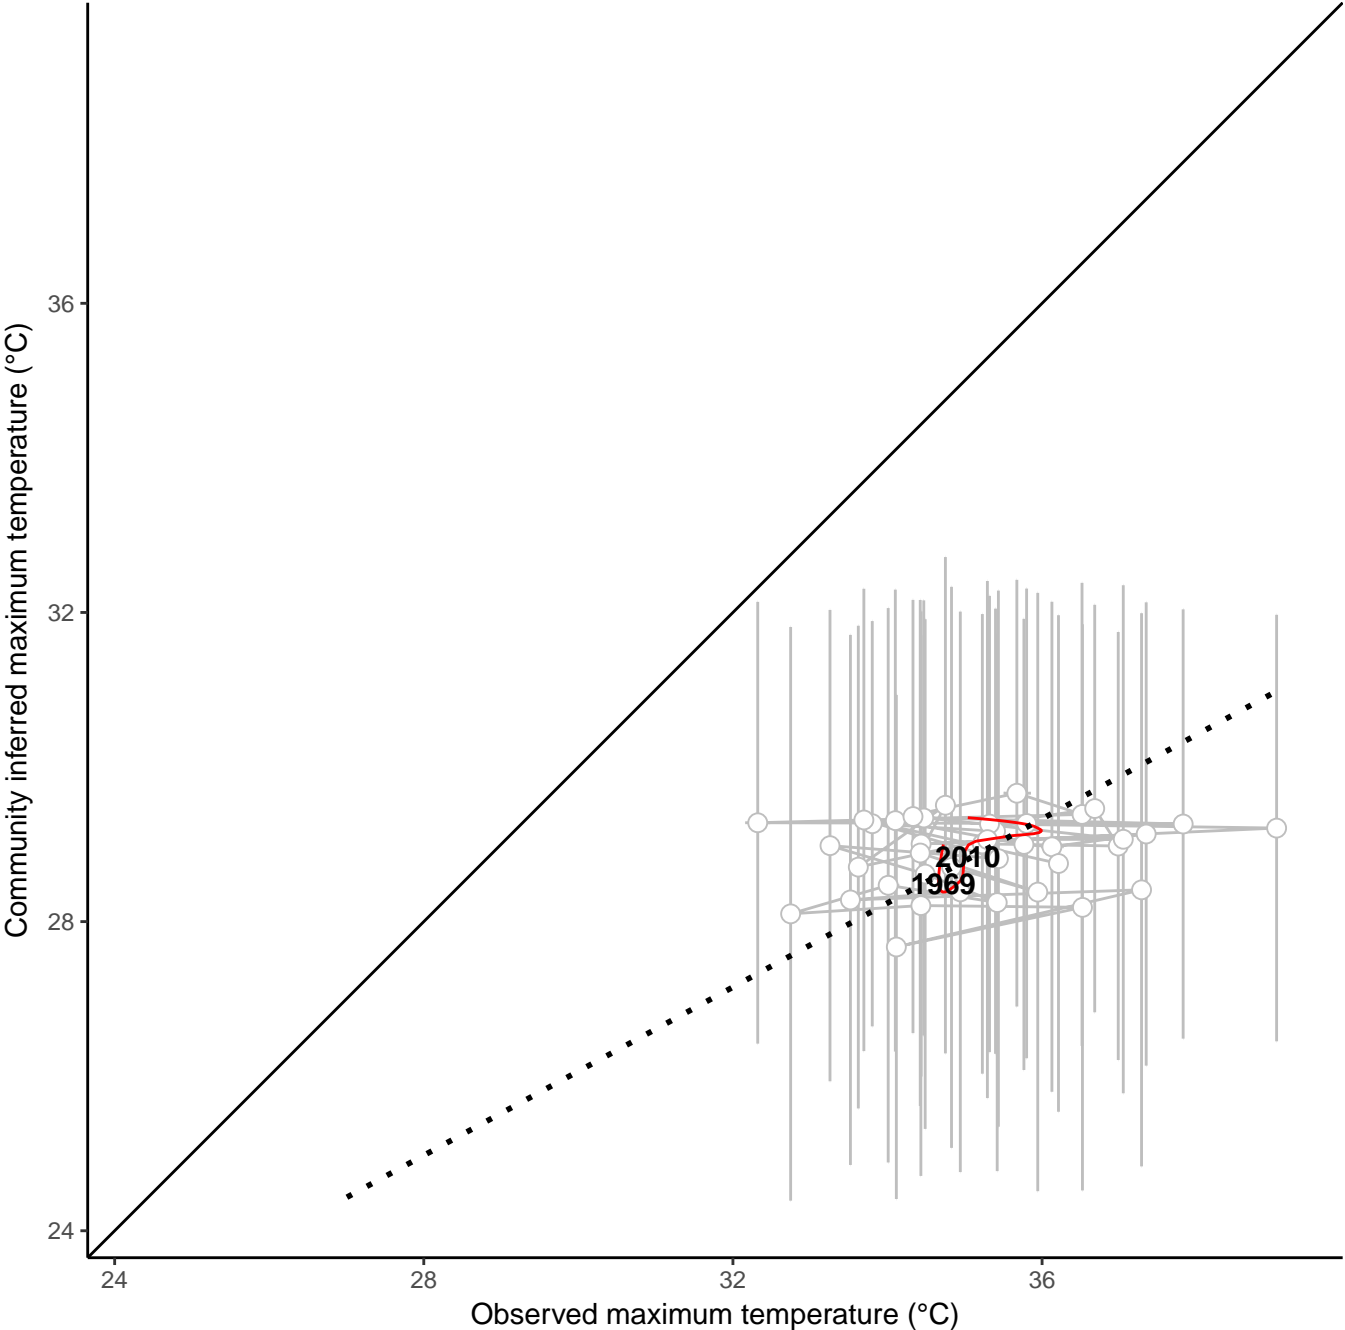

site : 840\_91\_15

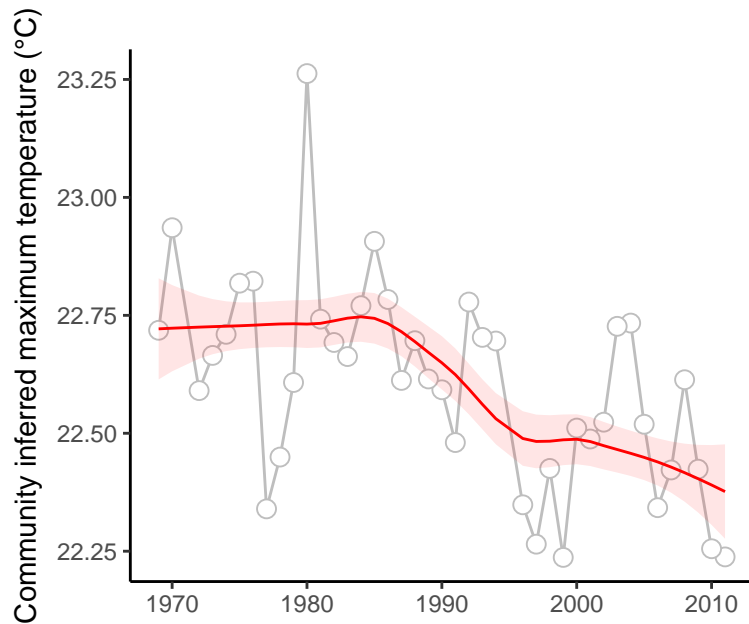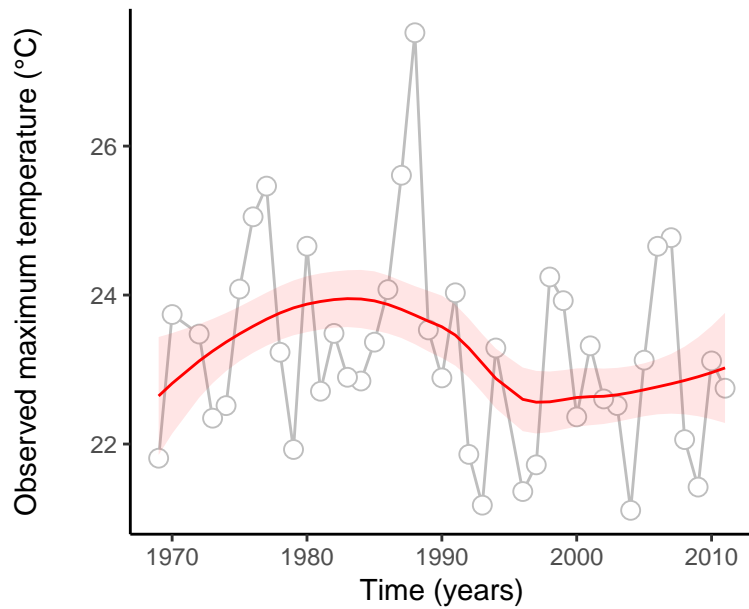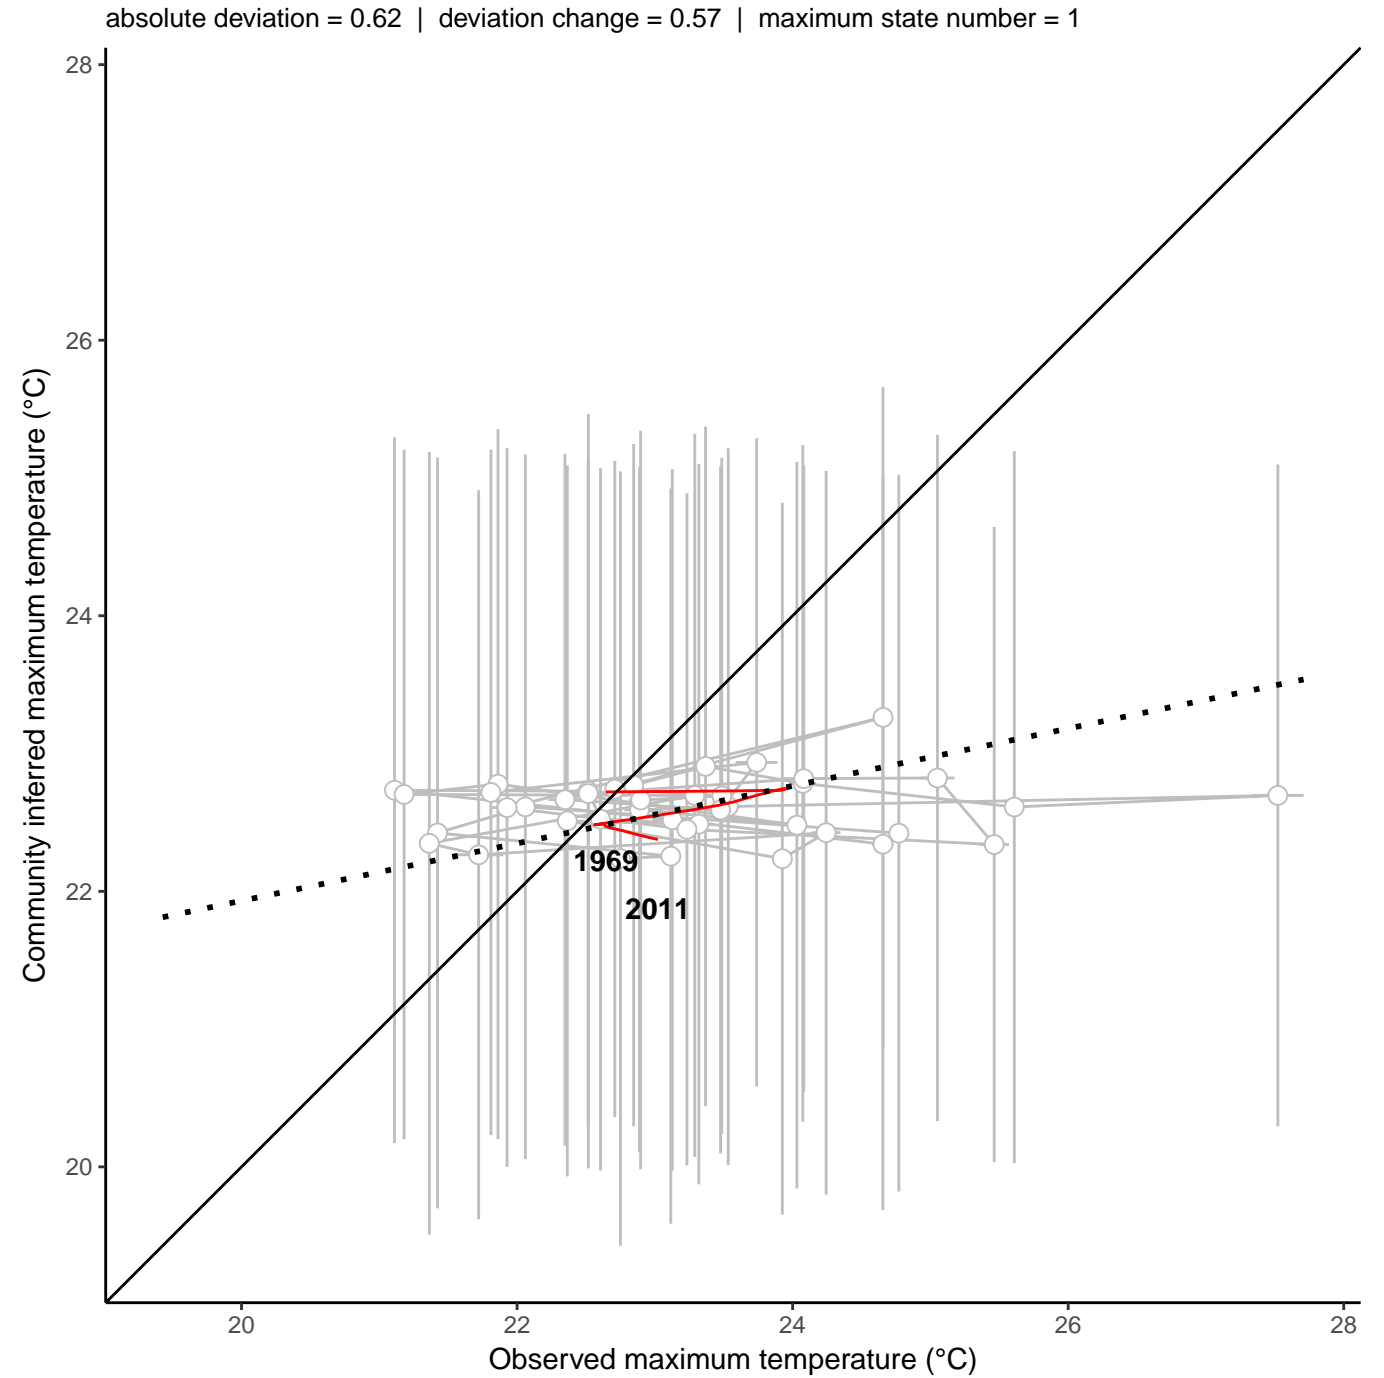

site : 840\_14\_4

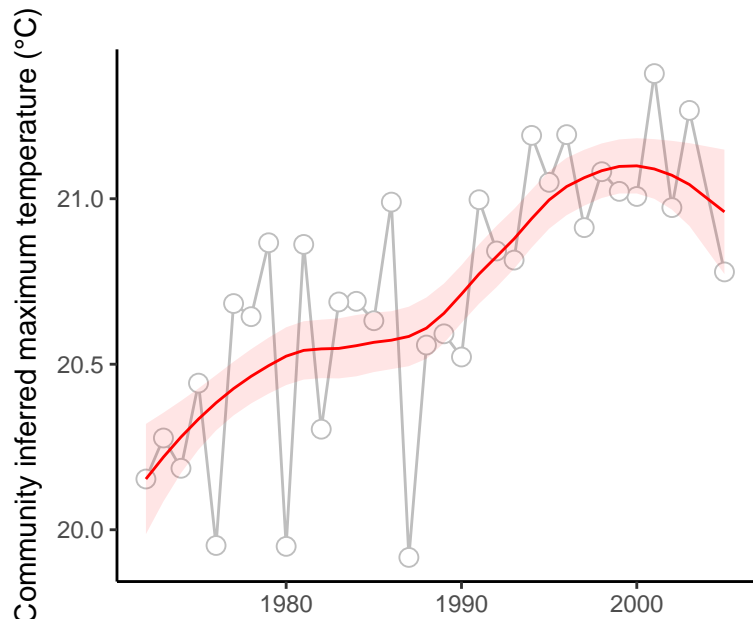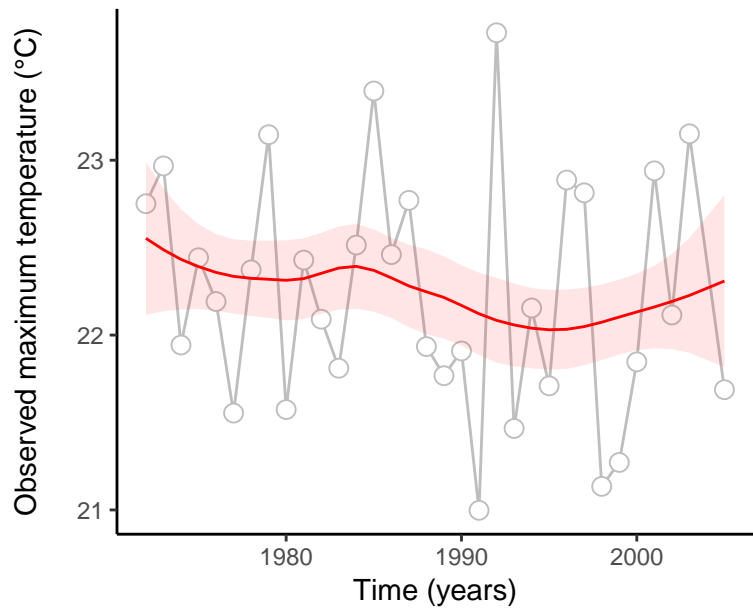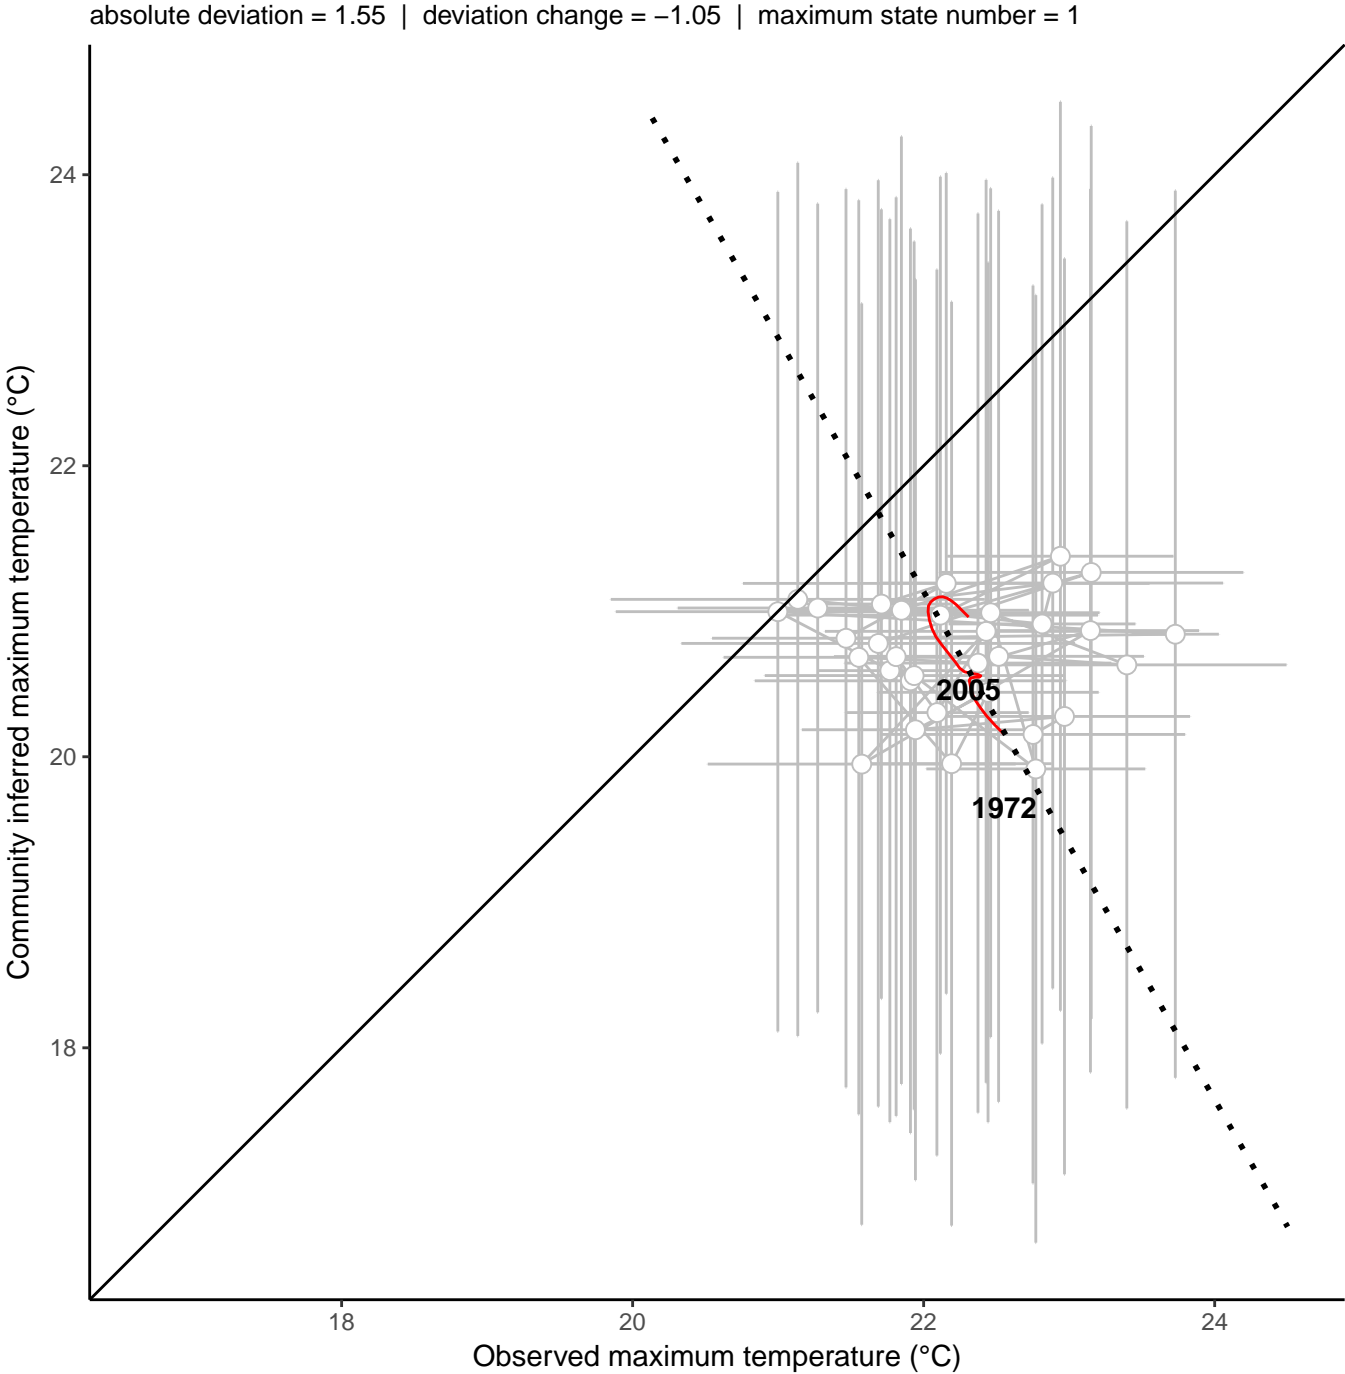

site : 840\_34\_62

absolute deviation = 3.31 | deviation change = 0.47 | maximum state number = 1

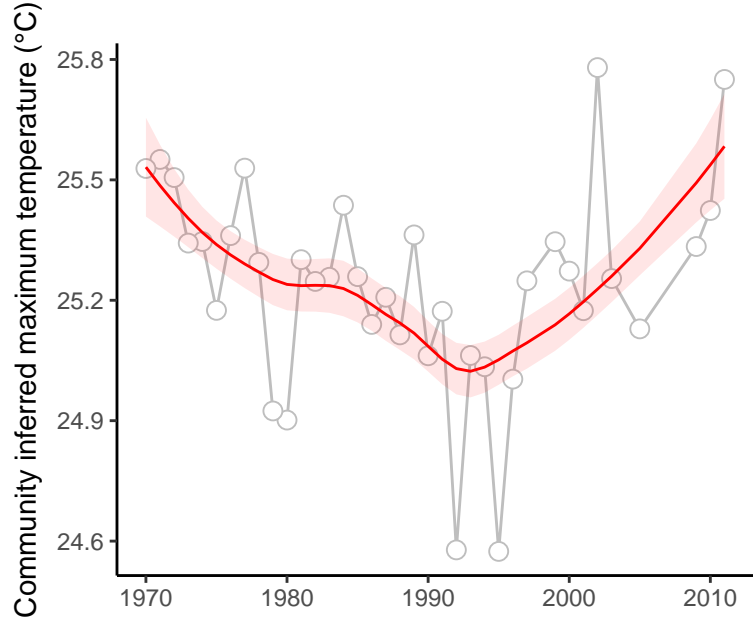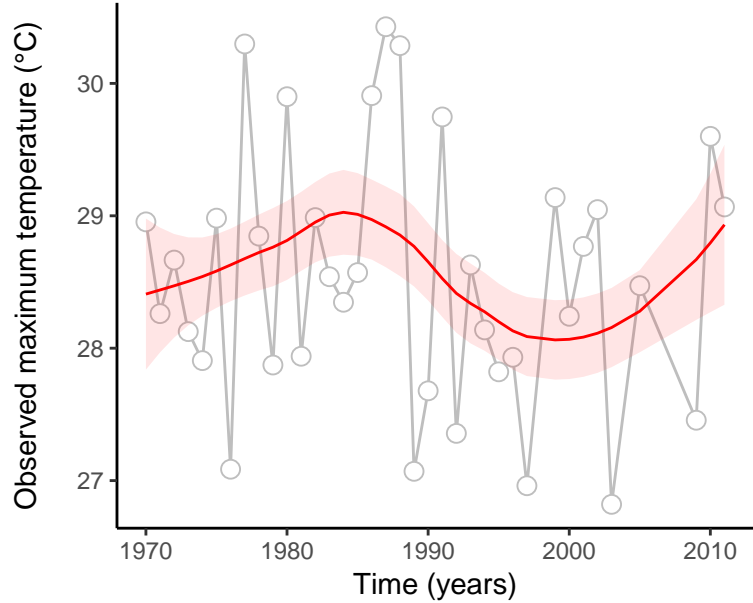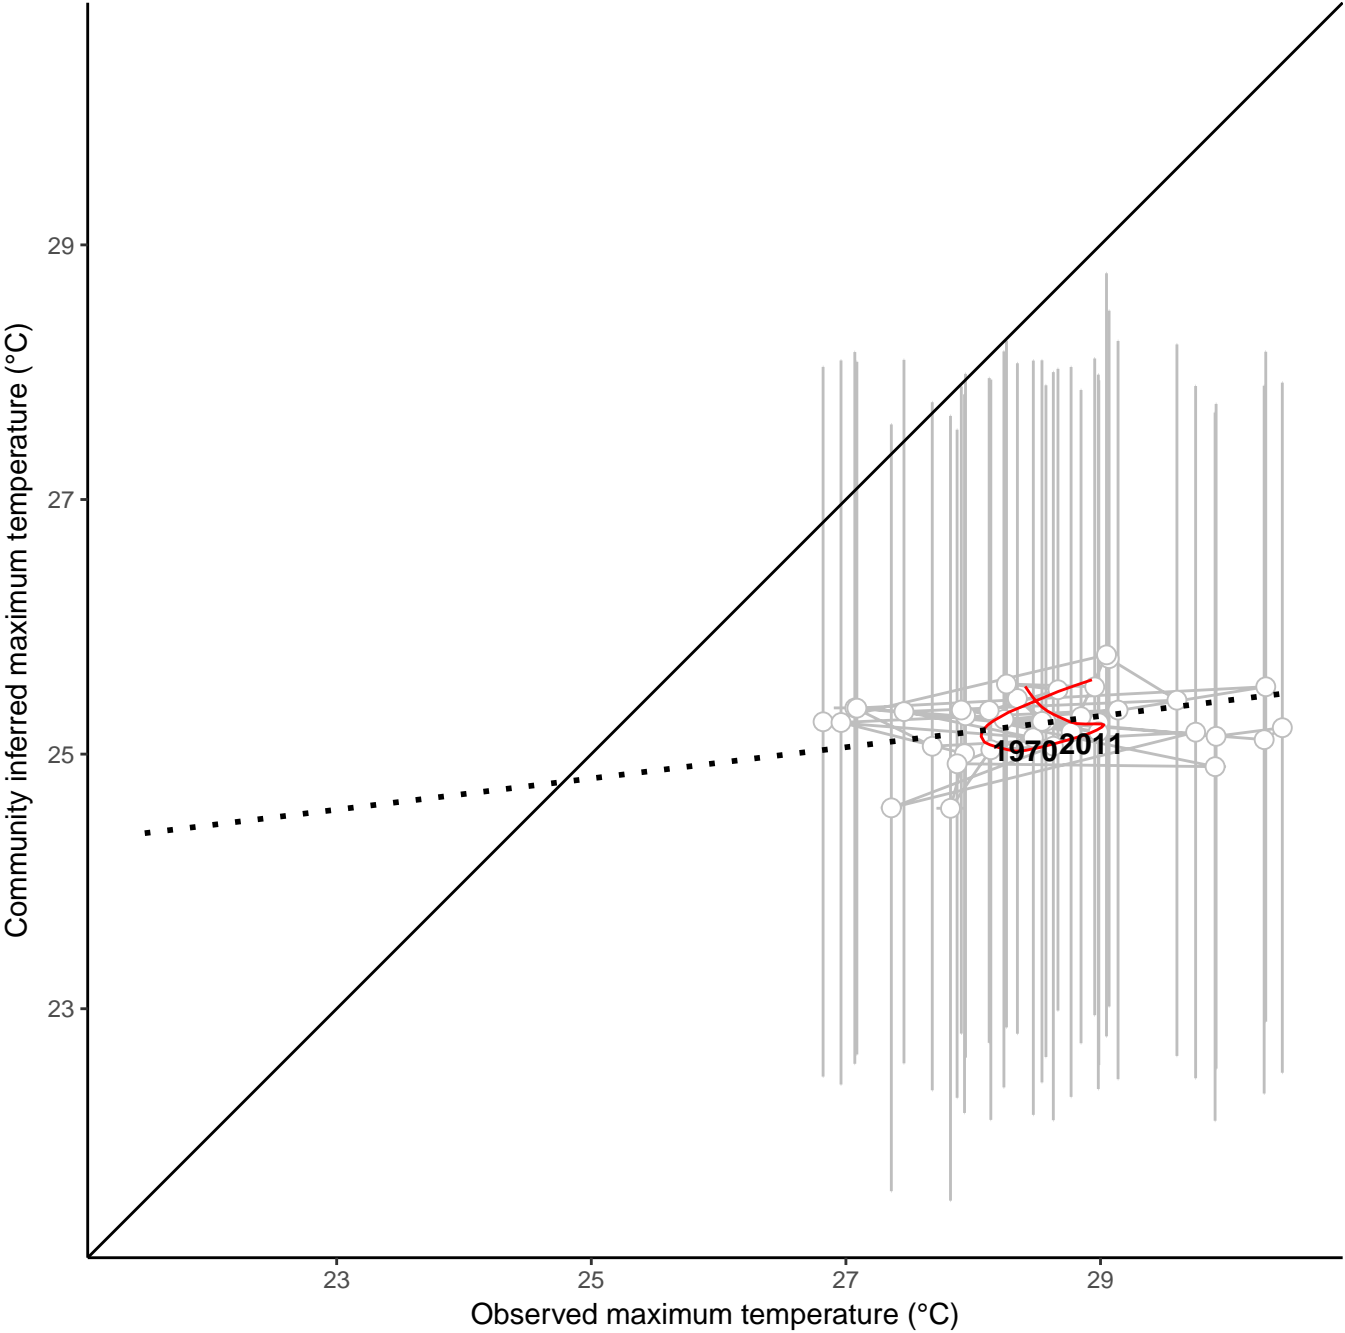

site : 840\_49\_20

absolute deviation = 1.83 | deviation change = 0.77 | maximum state number = 1

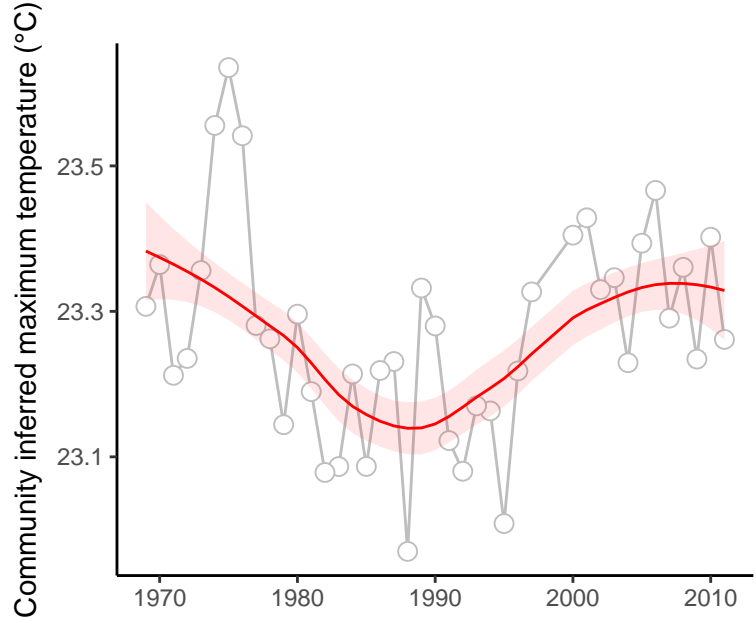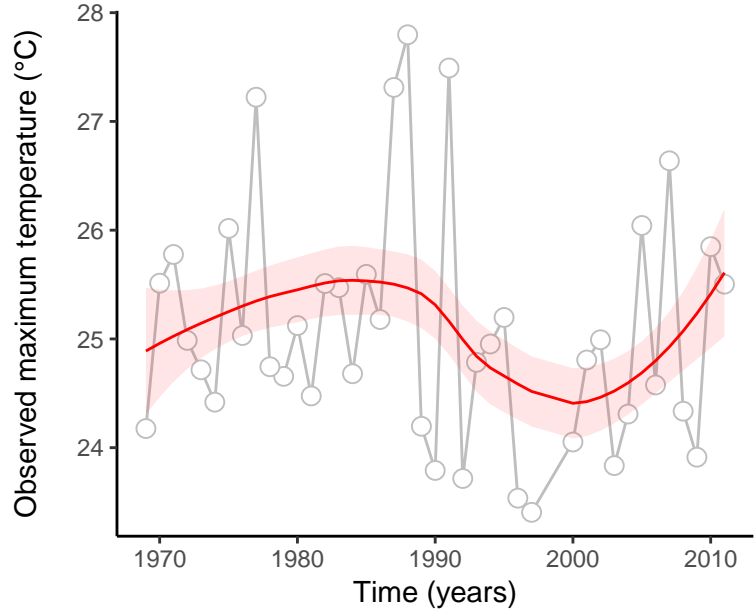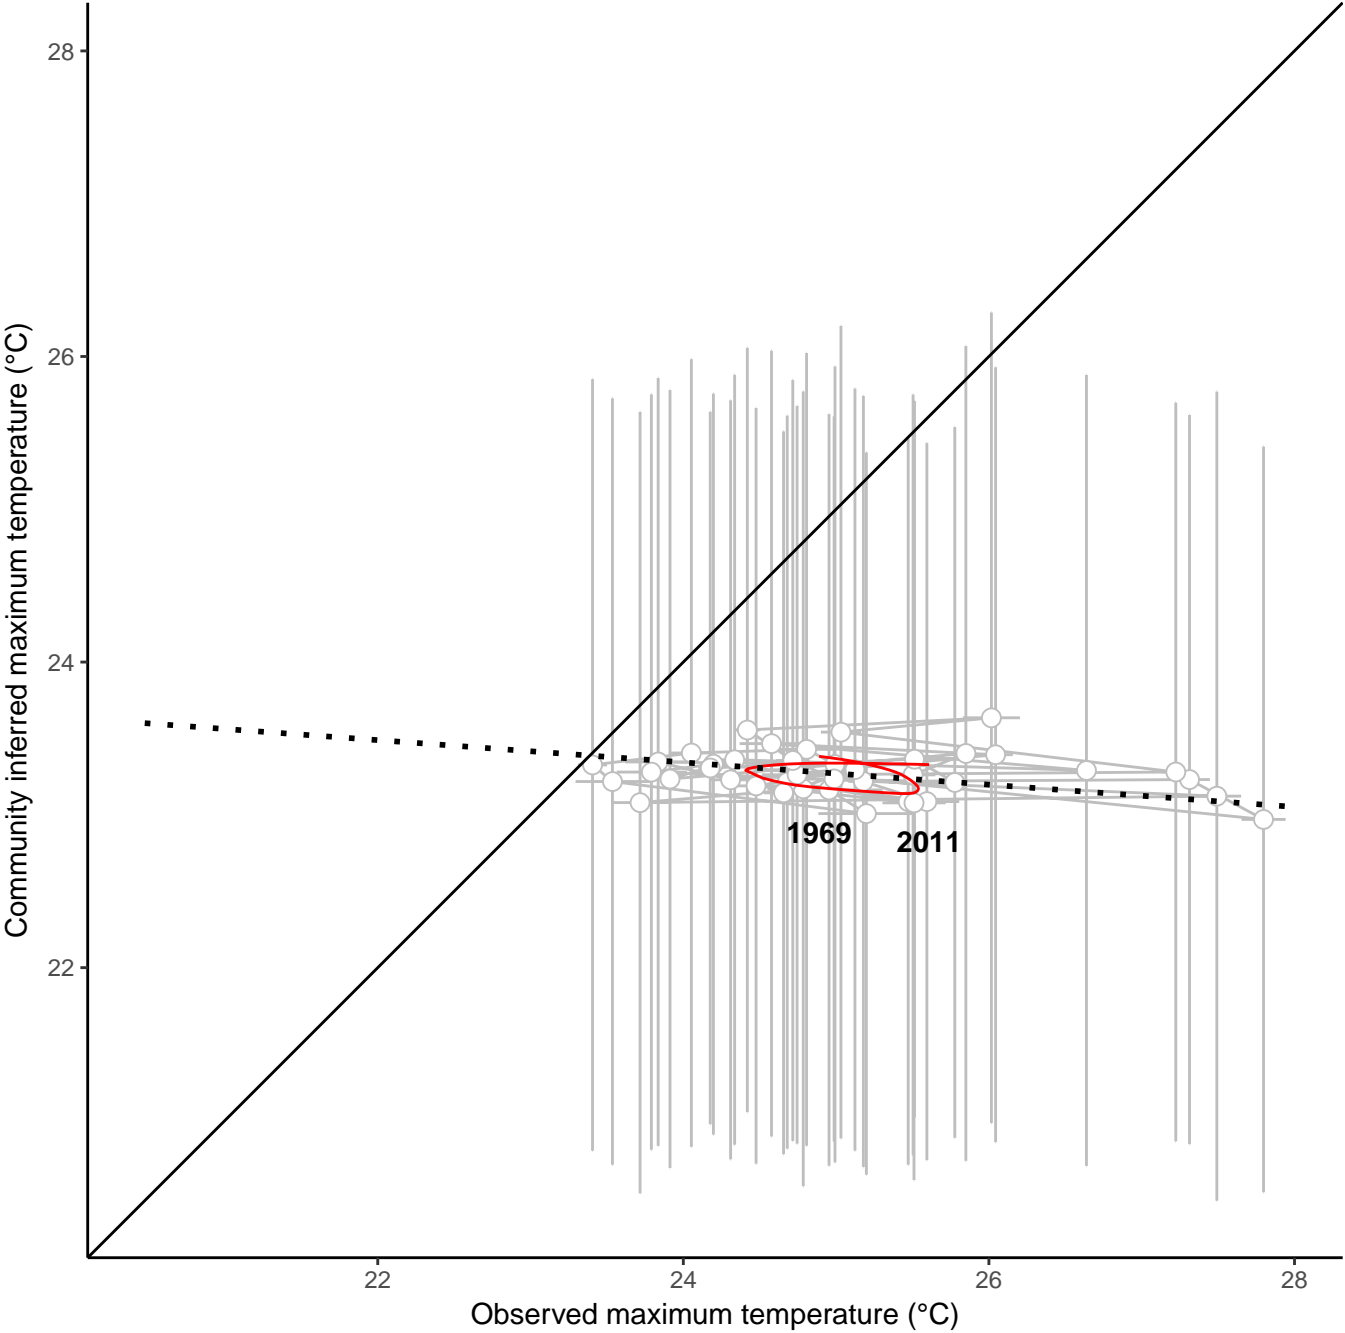

site : 840\_52\_34

absolute deviation = 2.55 | deviation change = -0.12 | maximum state number = 1

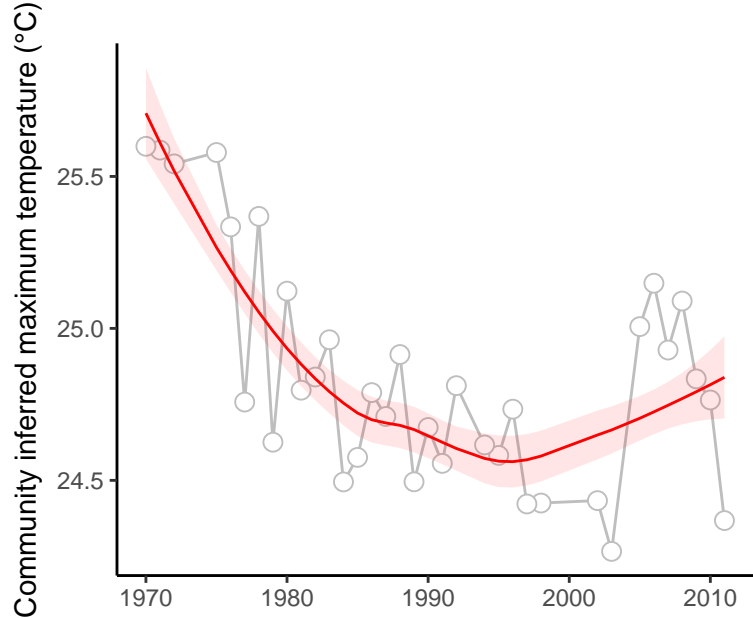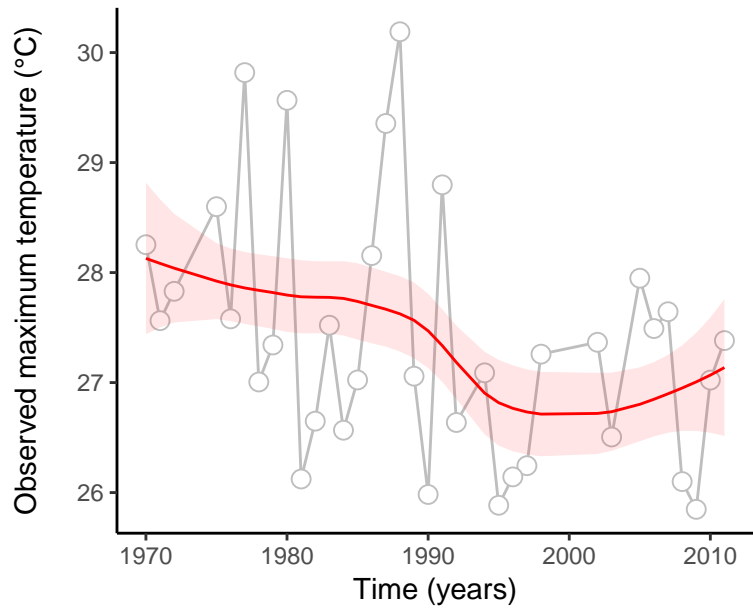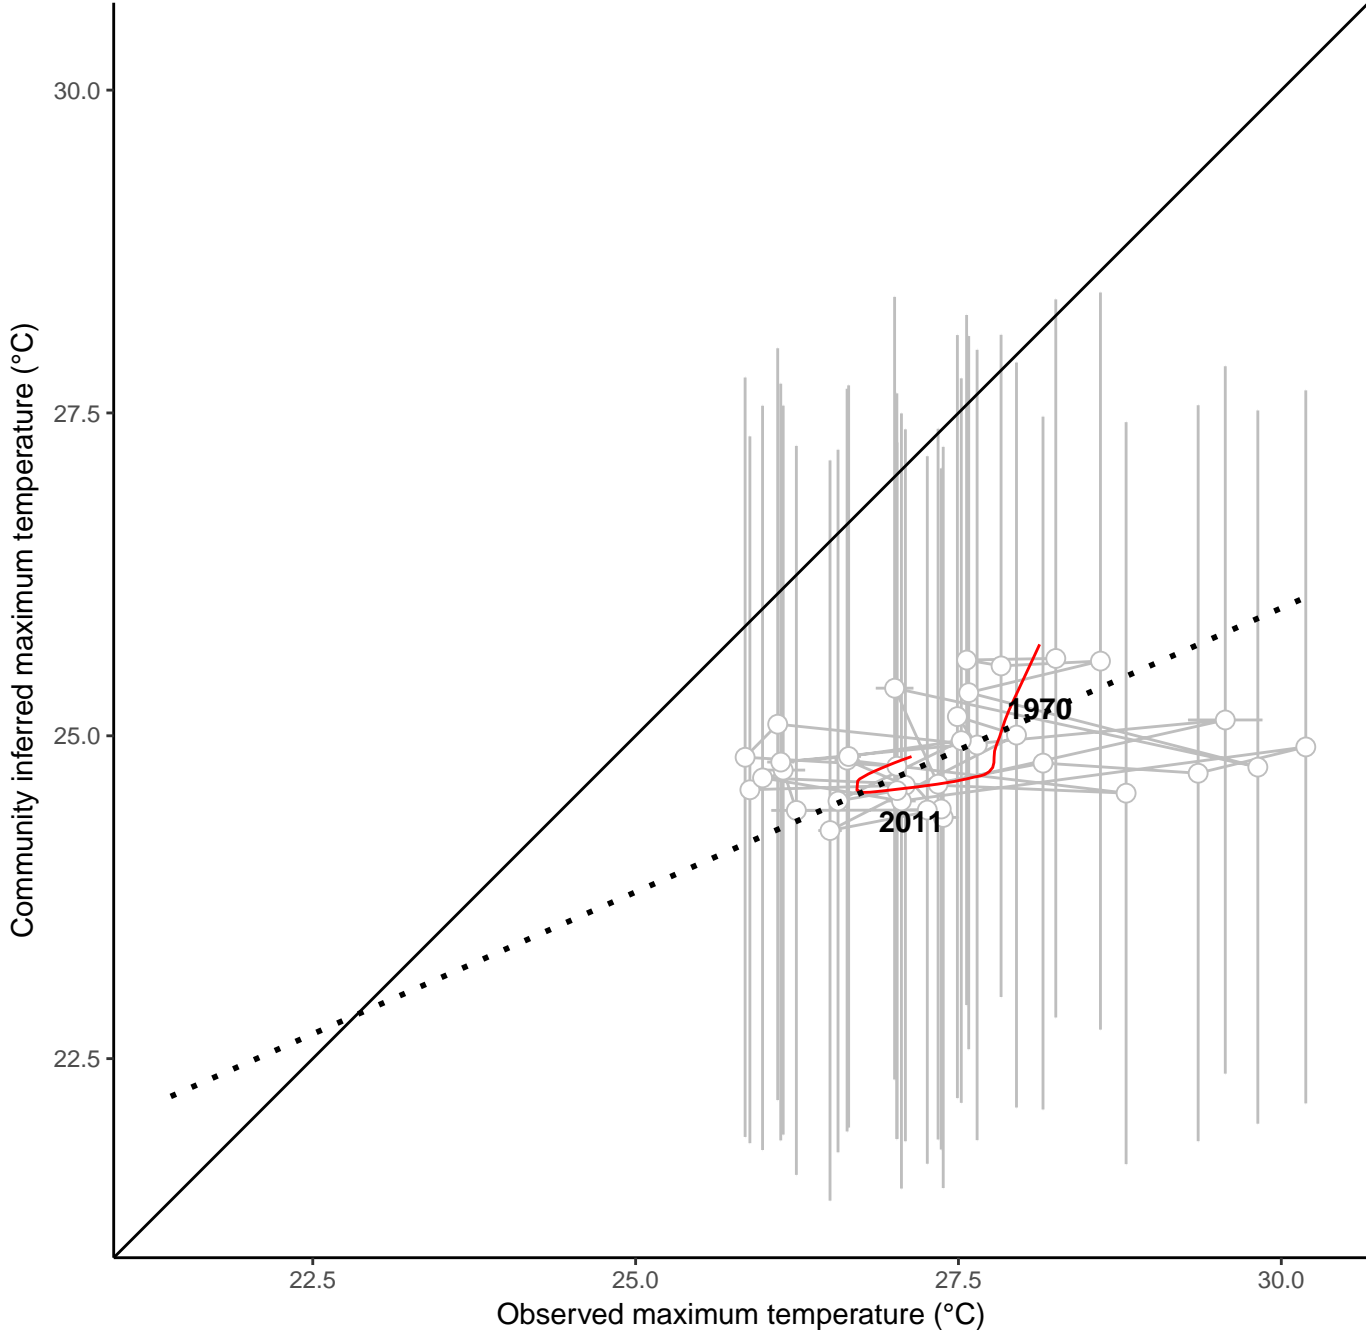

site : 840\_64\_23

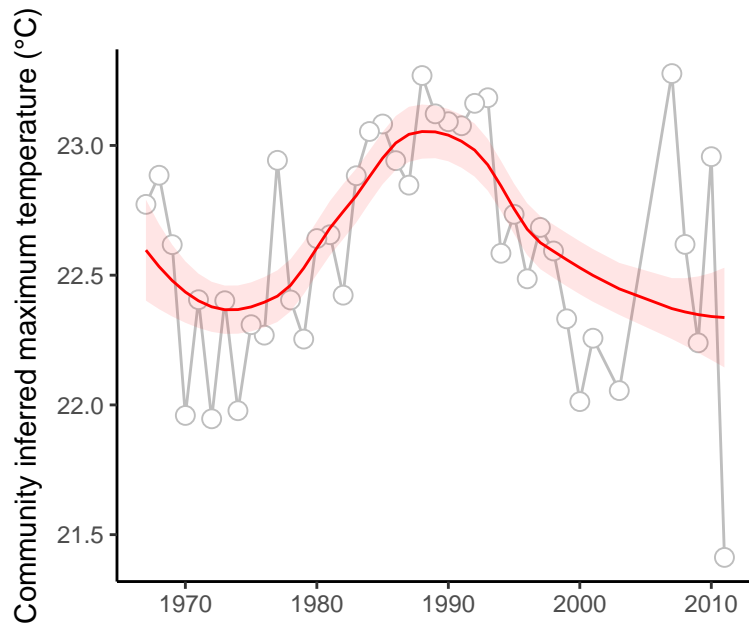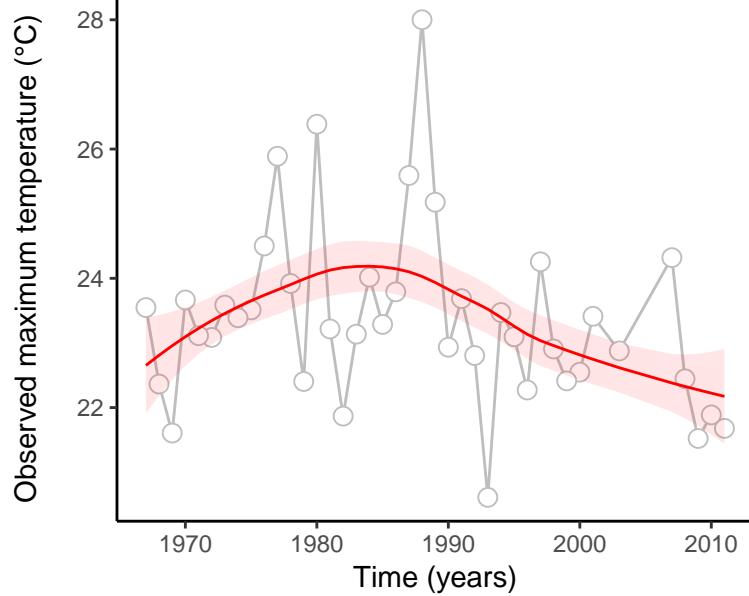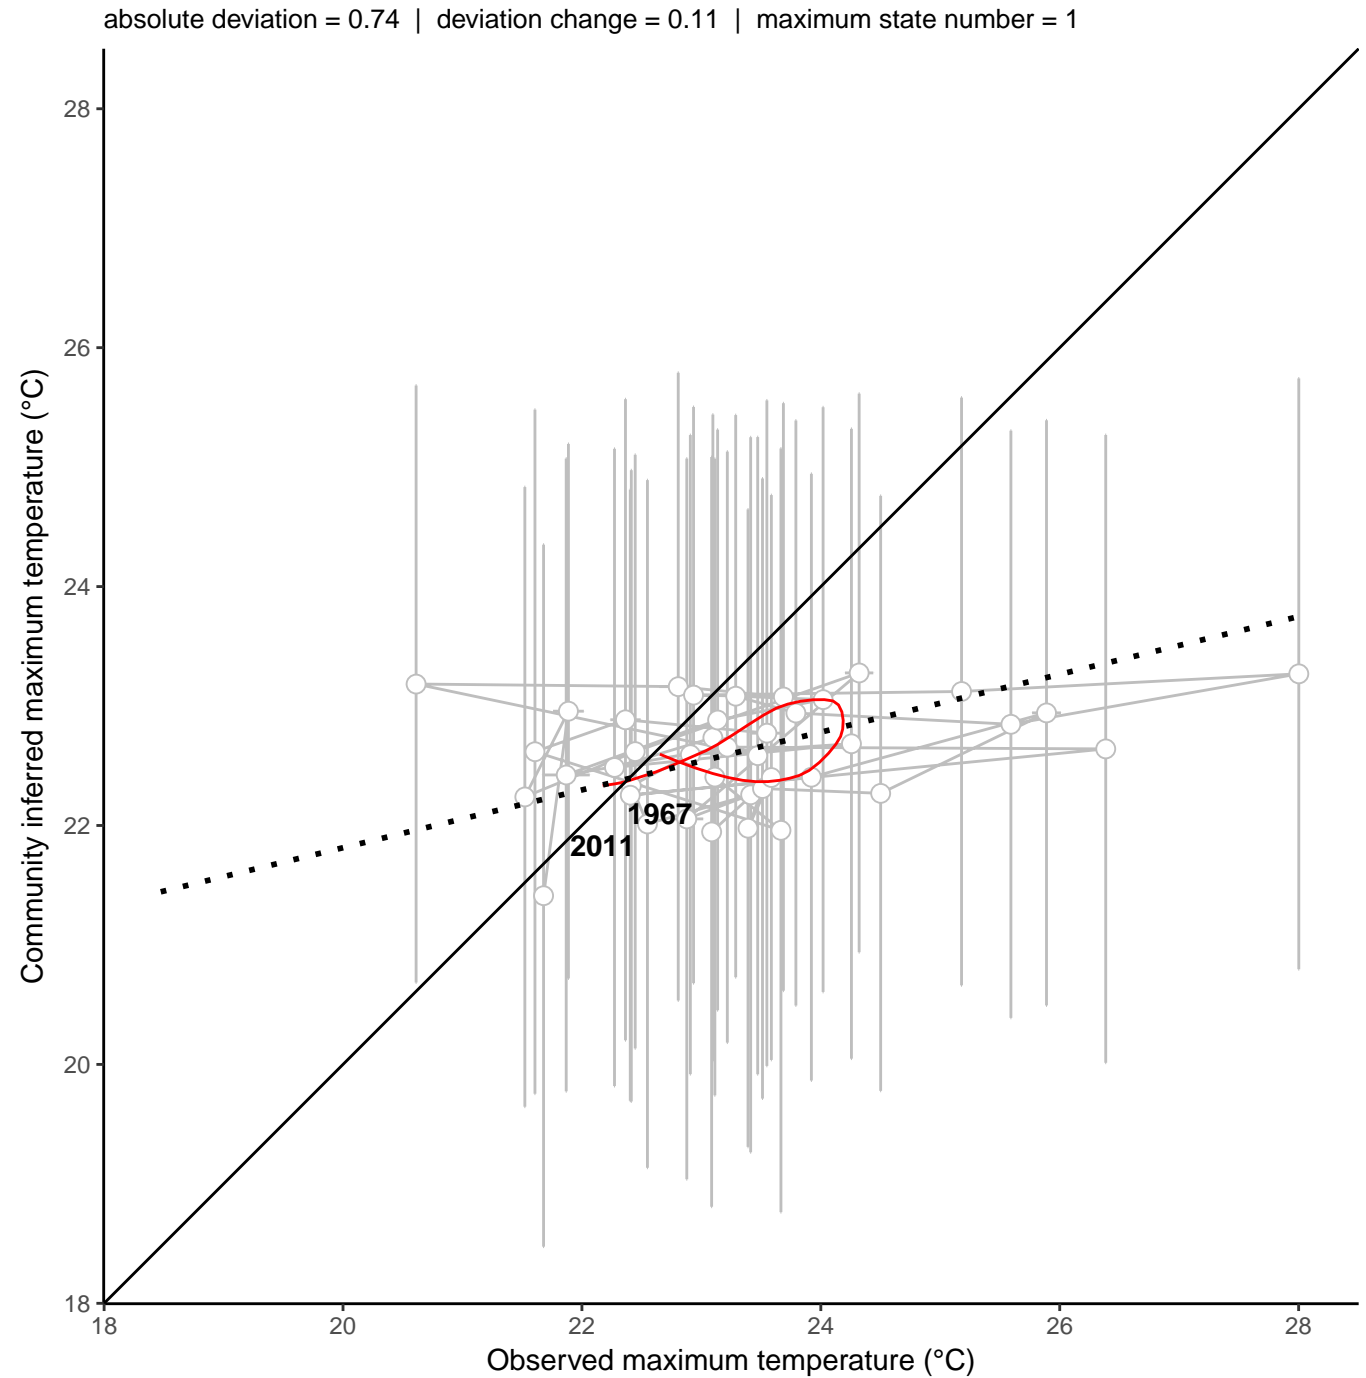



site : 840\_66\_22

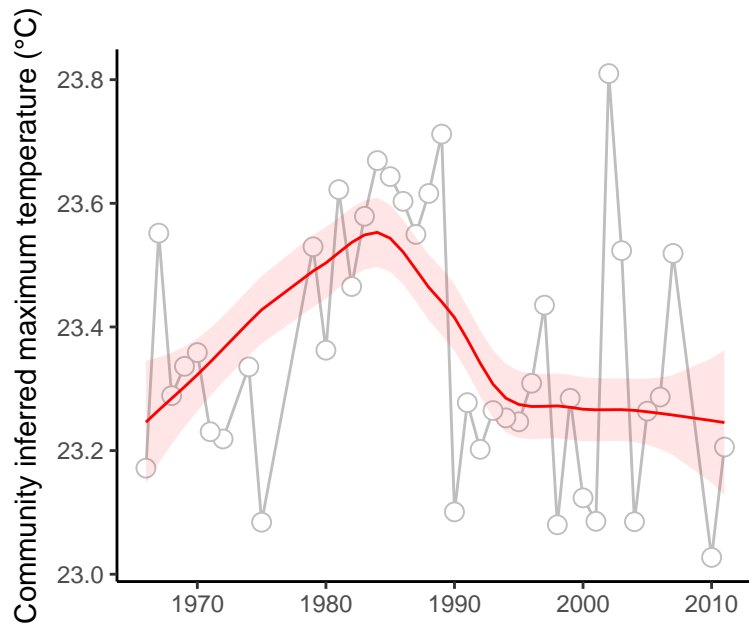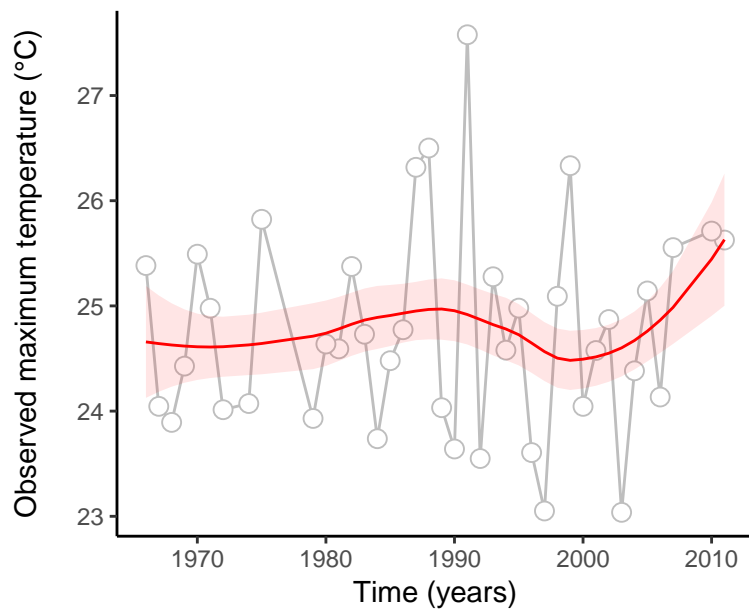

absolute deviation = 1.42 | deviation change = 0.97 | maximum state number = 1

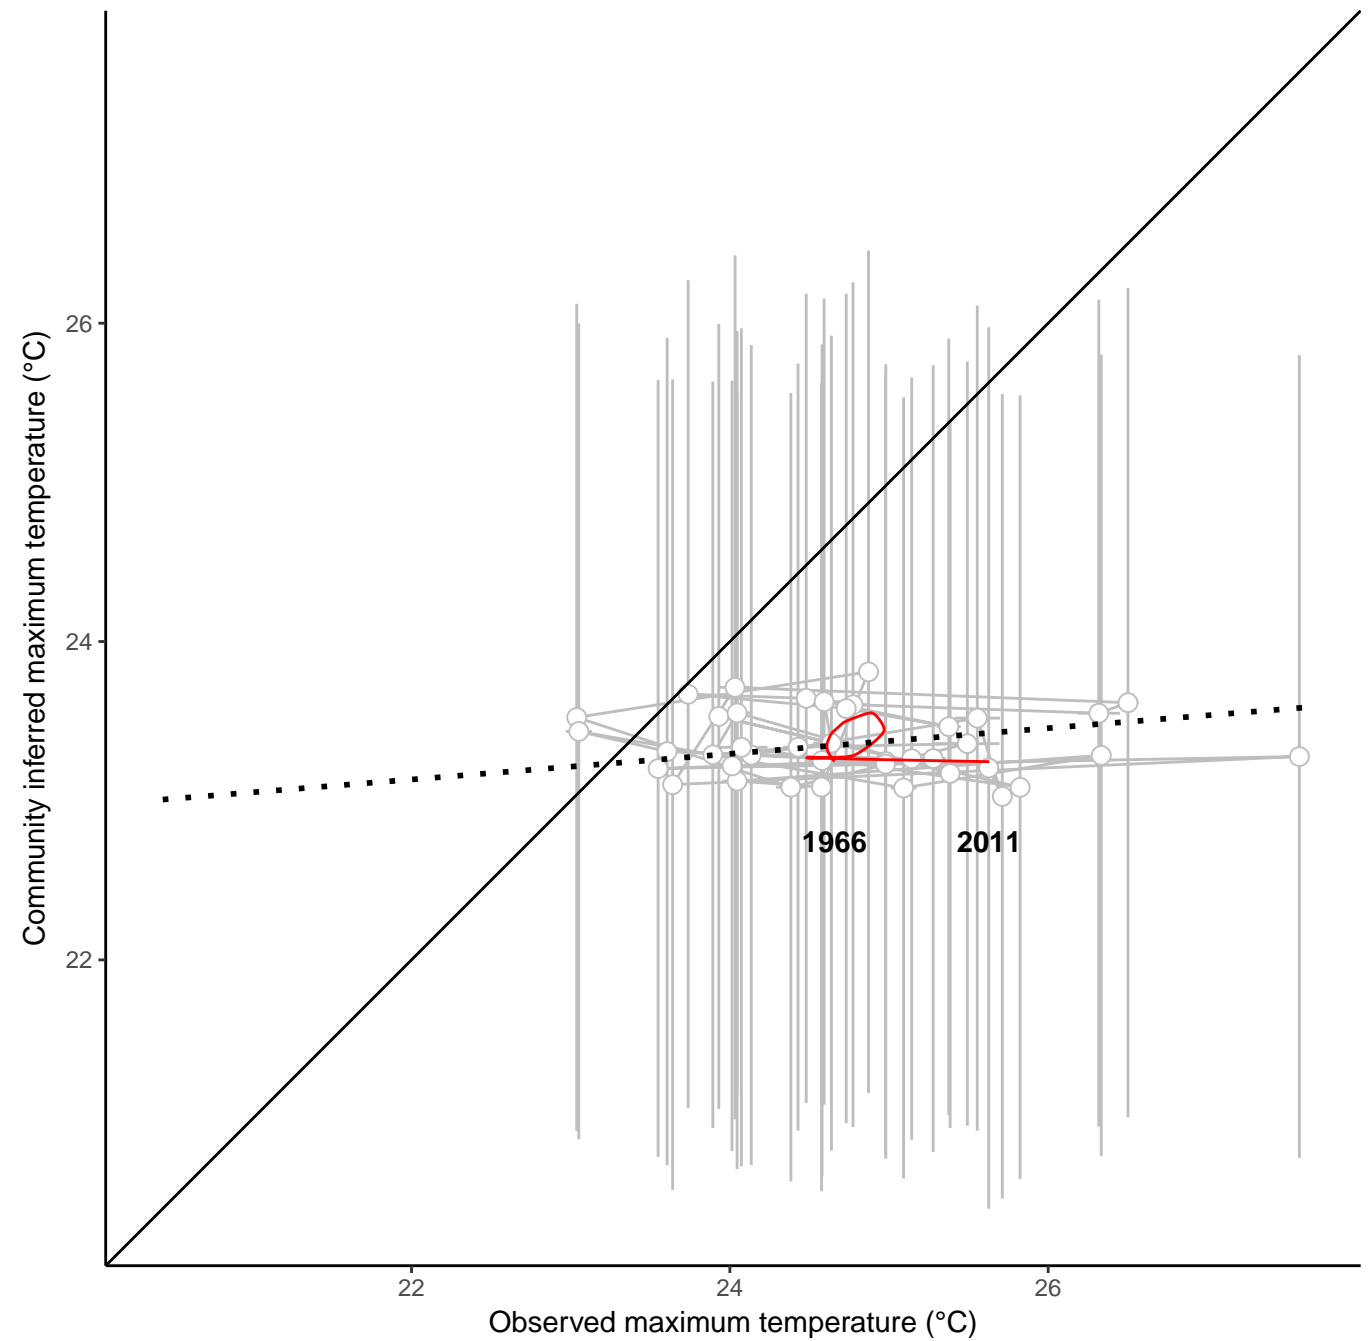

site : 840\_66\_43

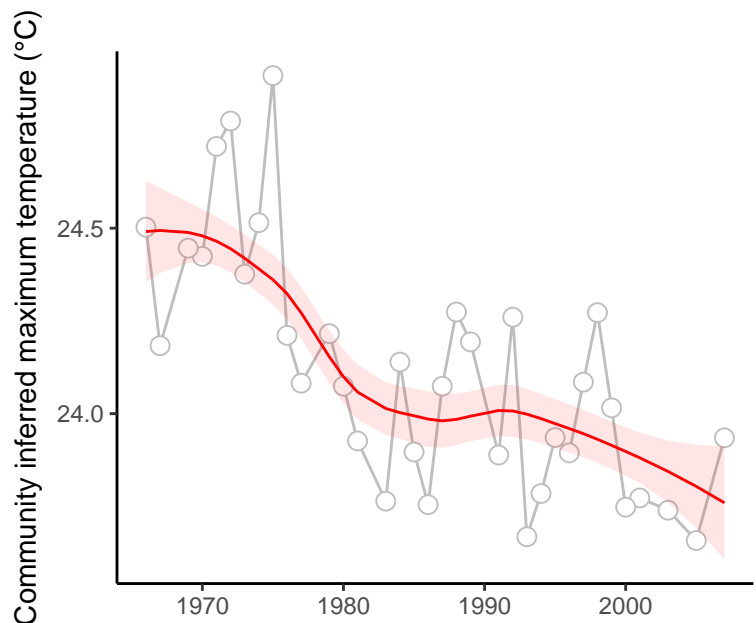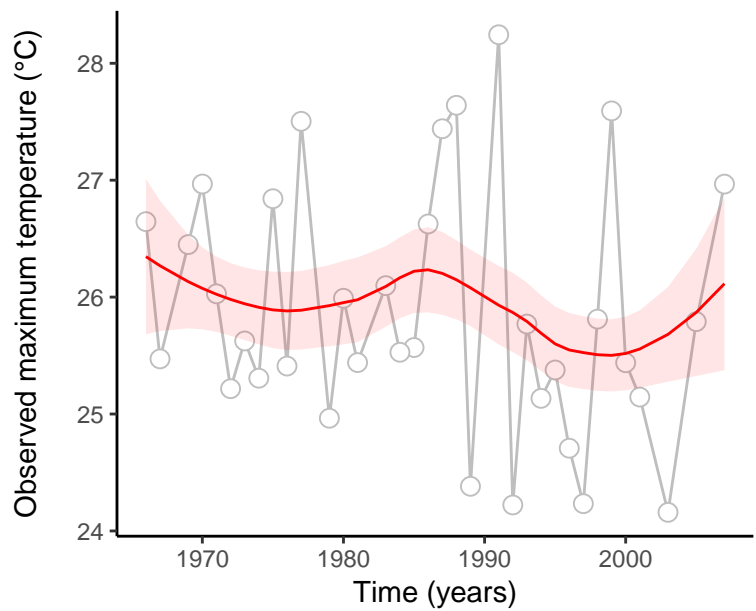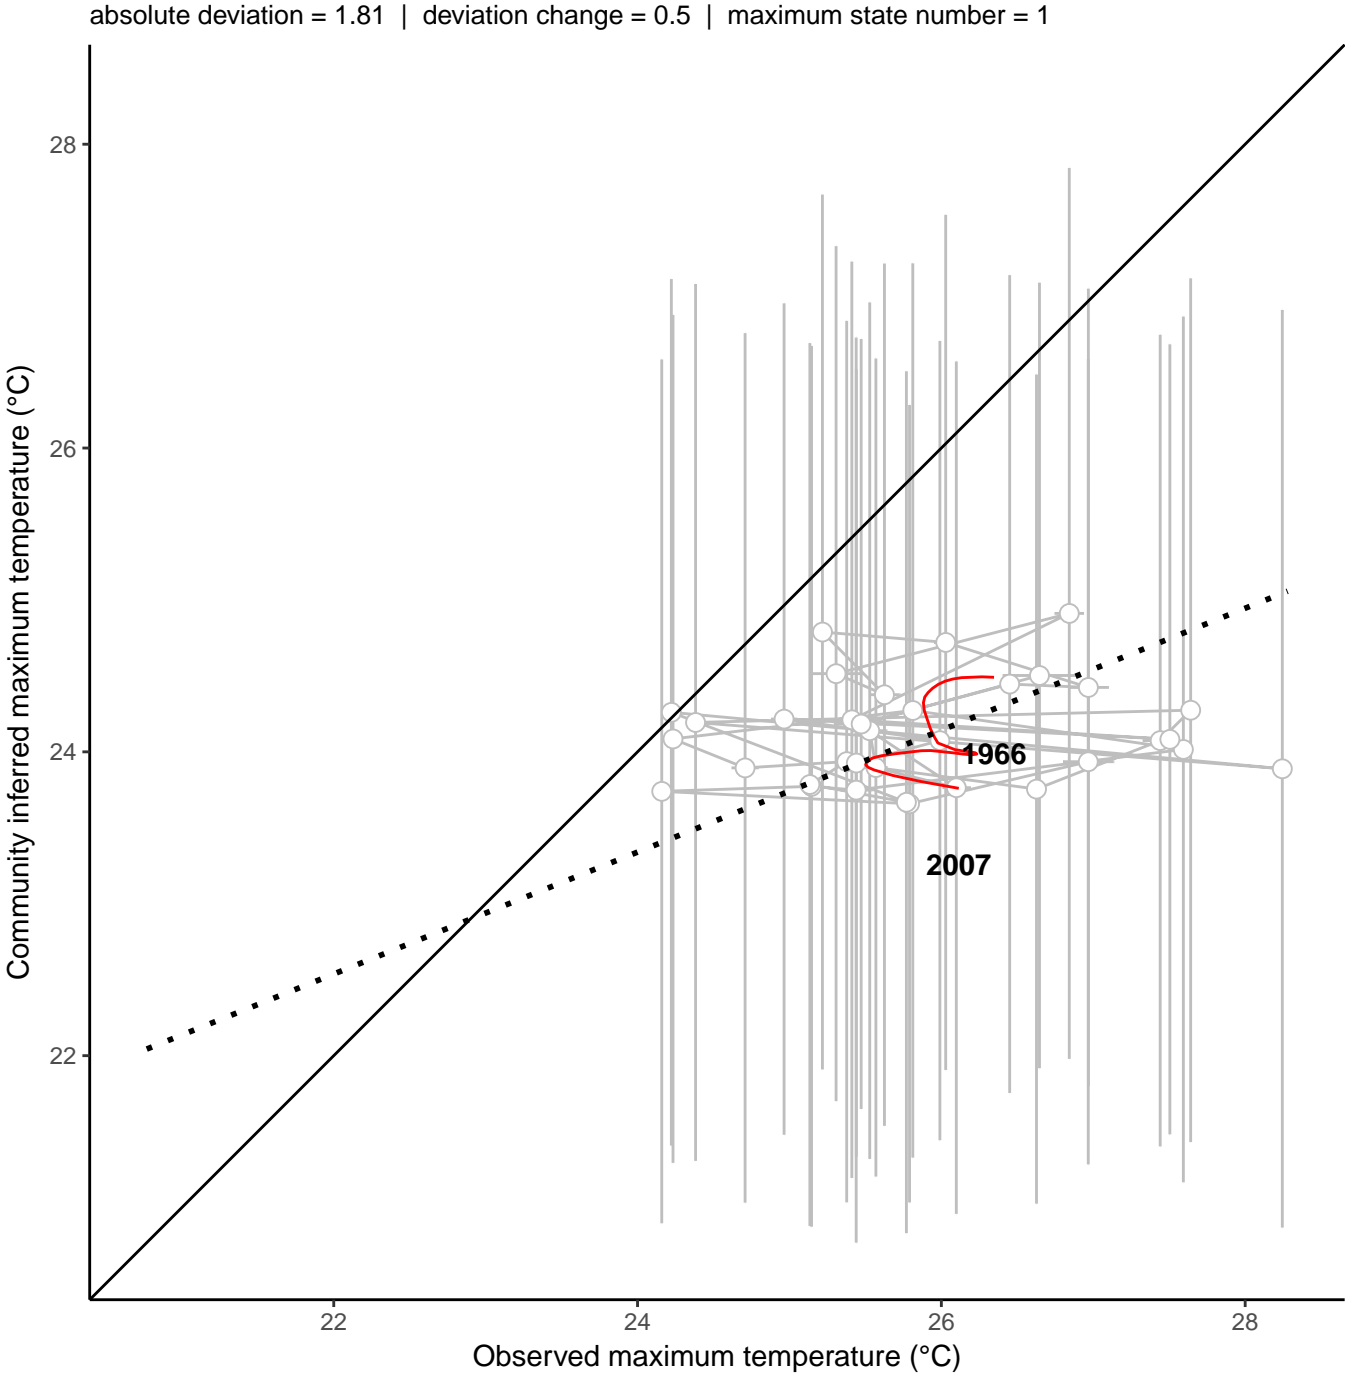

site : 840\_72\_24

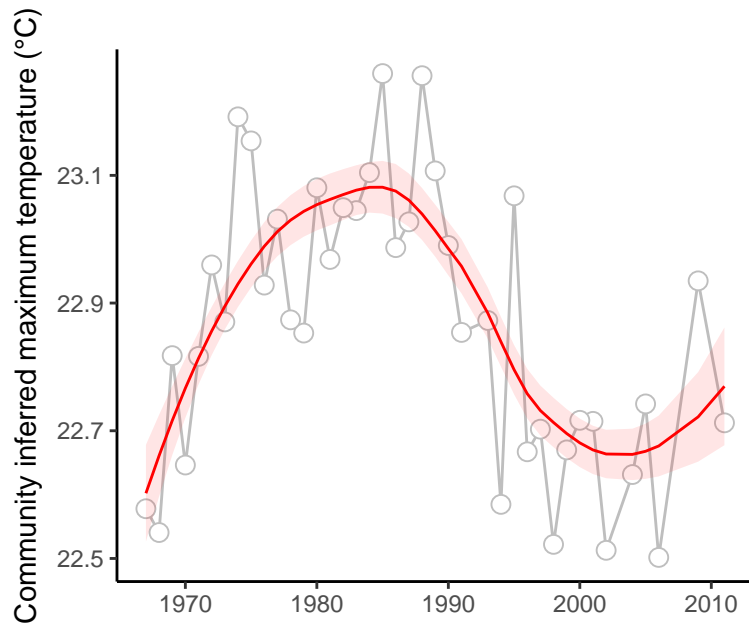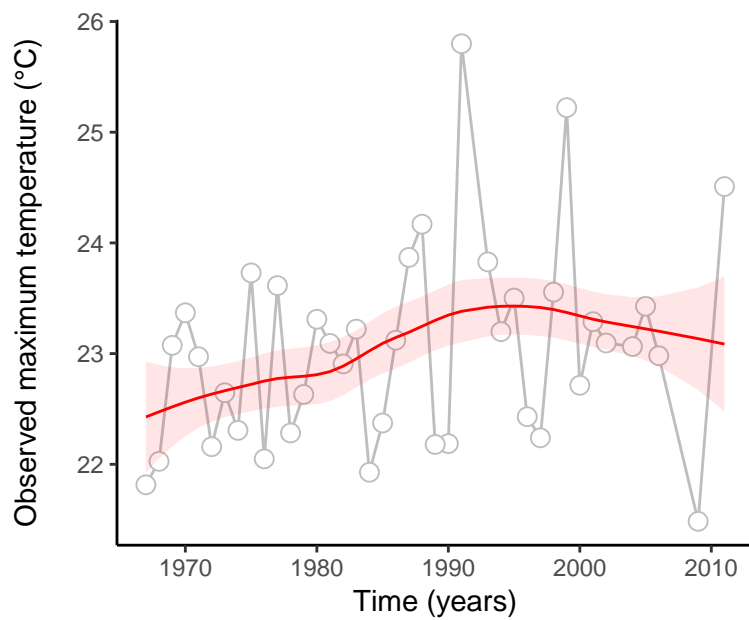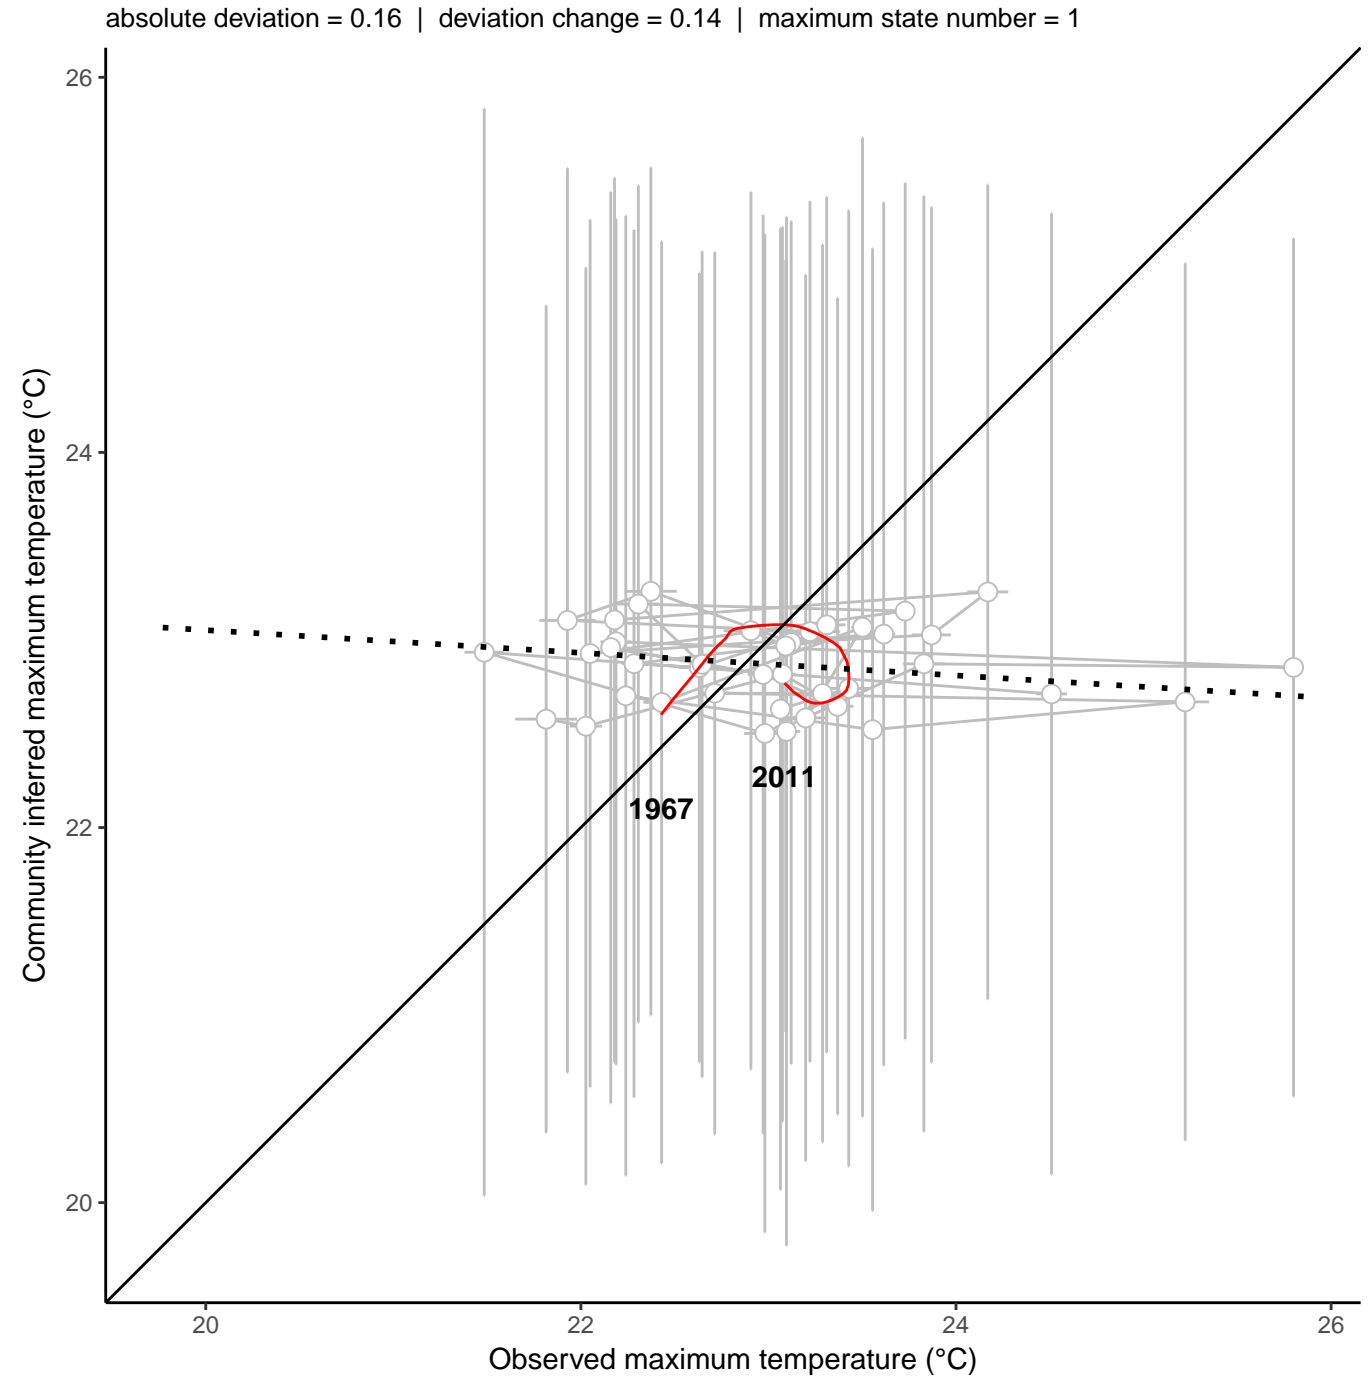

site : 840\_91\_36

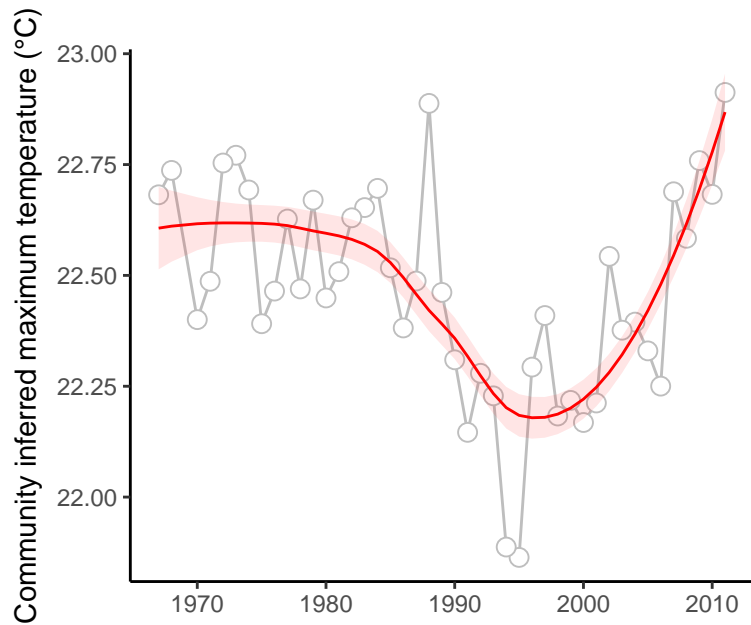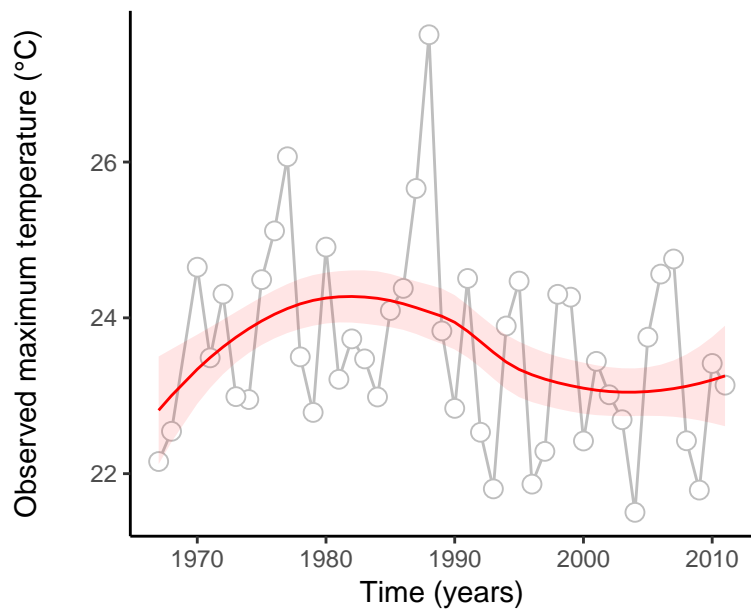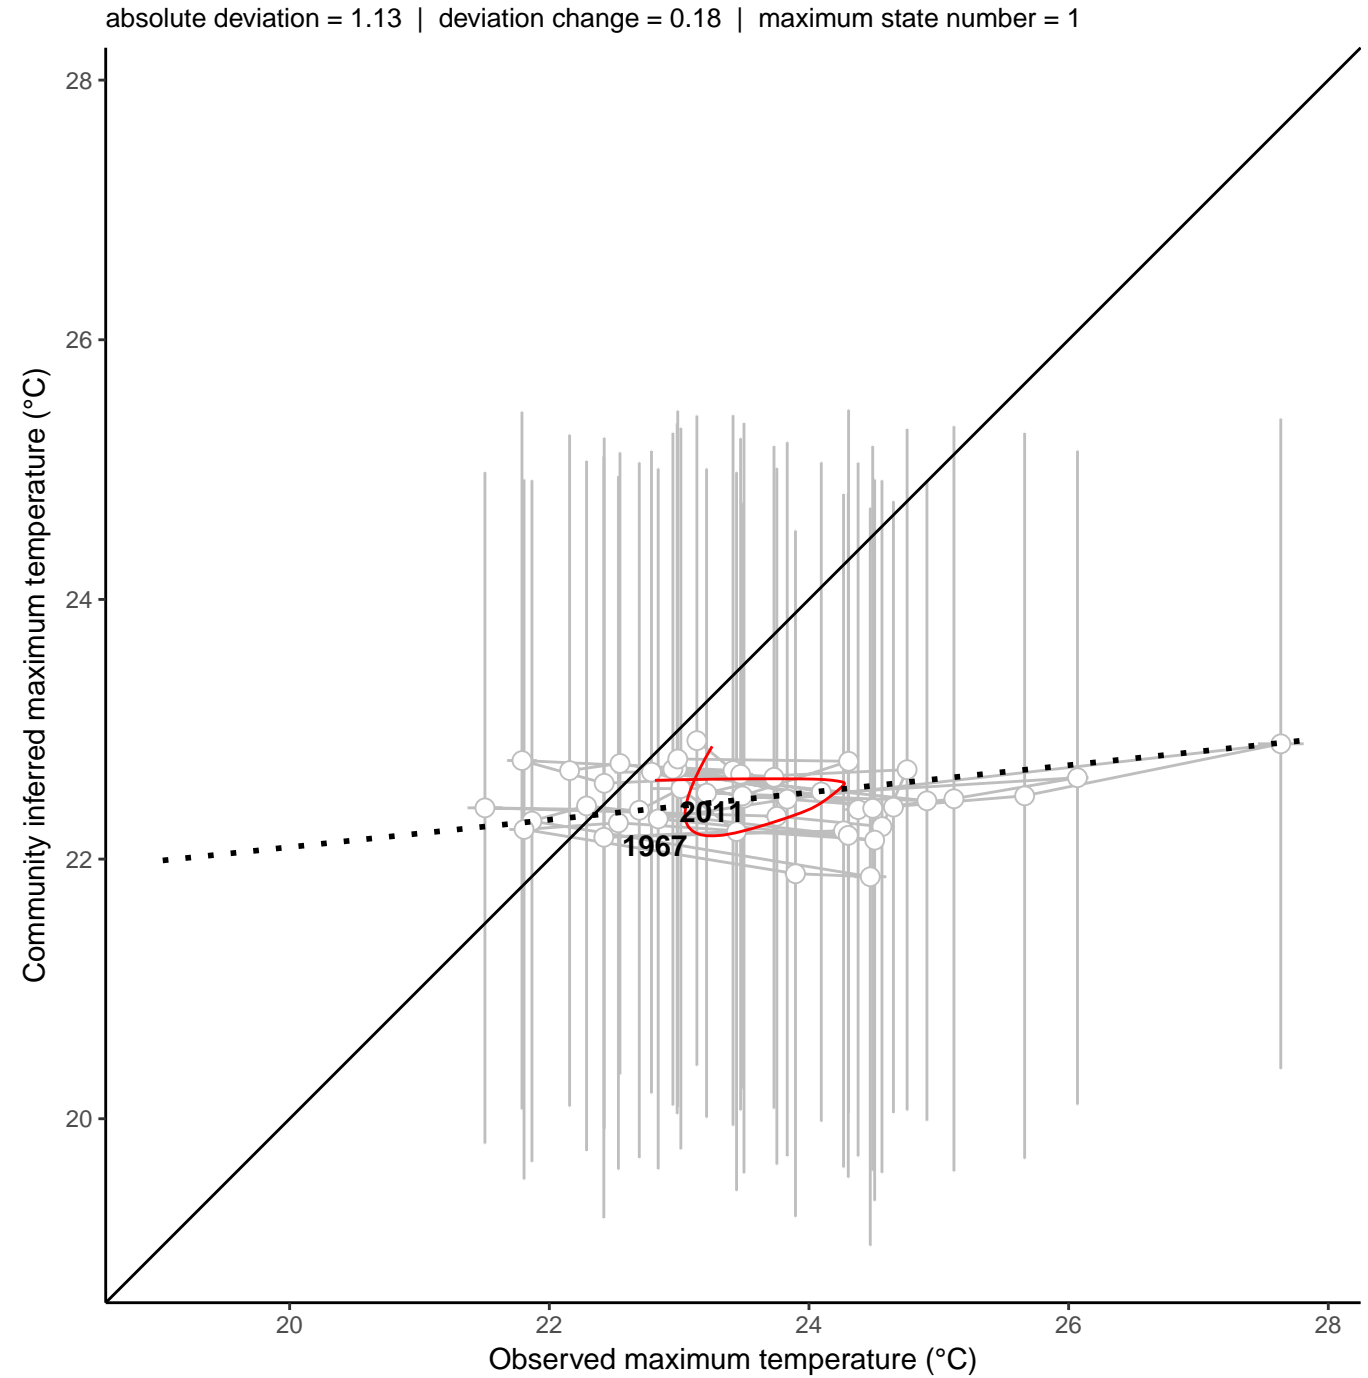

site : 840\_91\_44

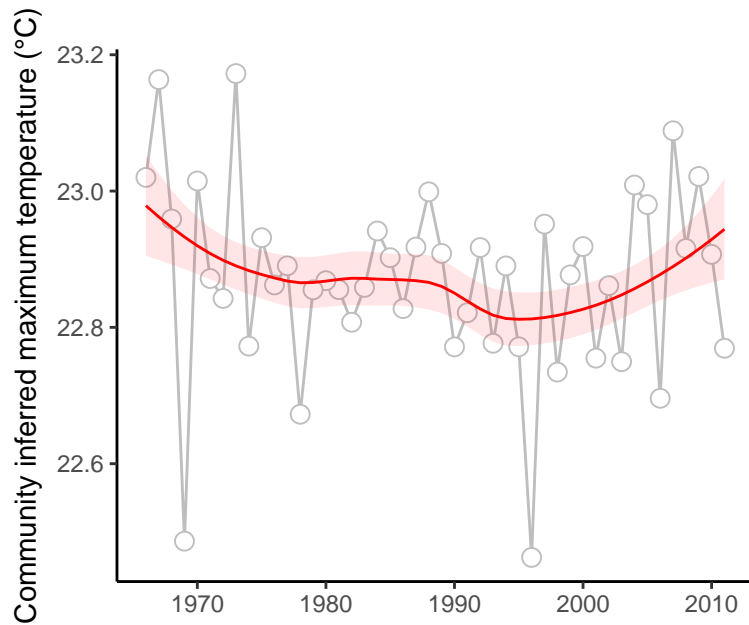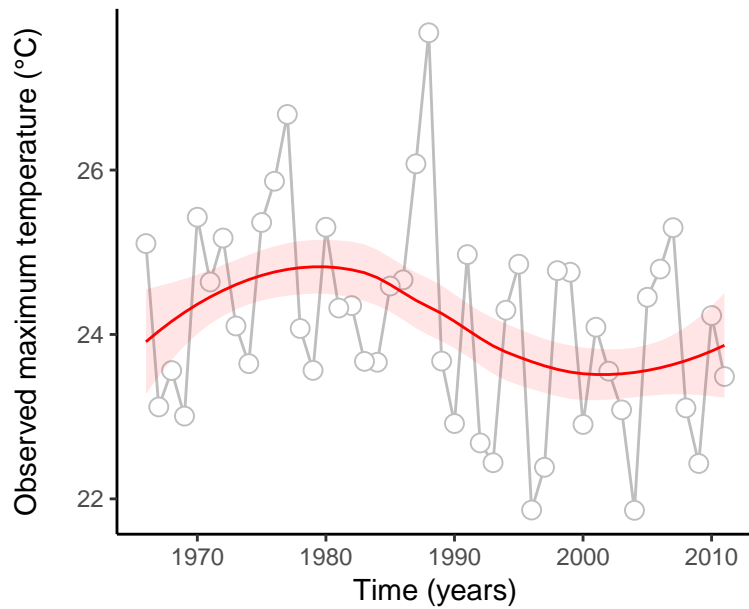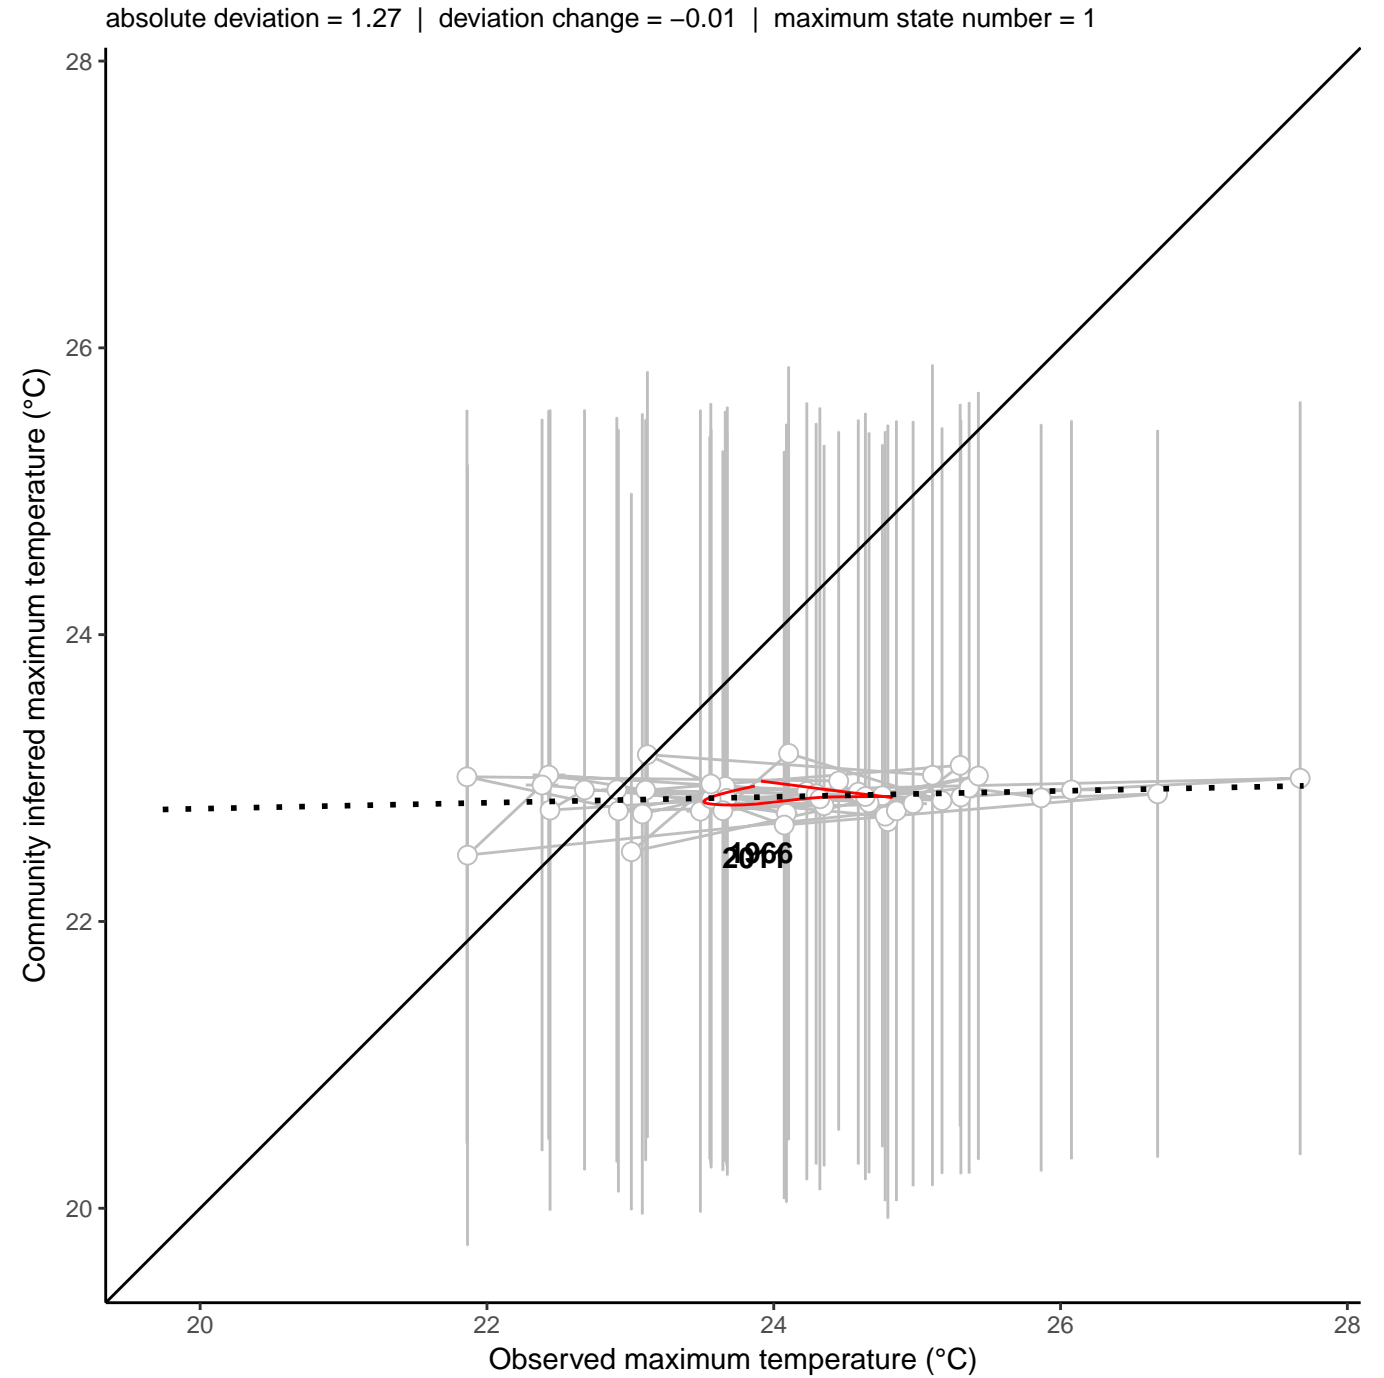

site : 840\_14\_15

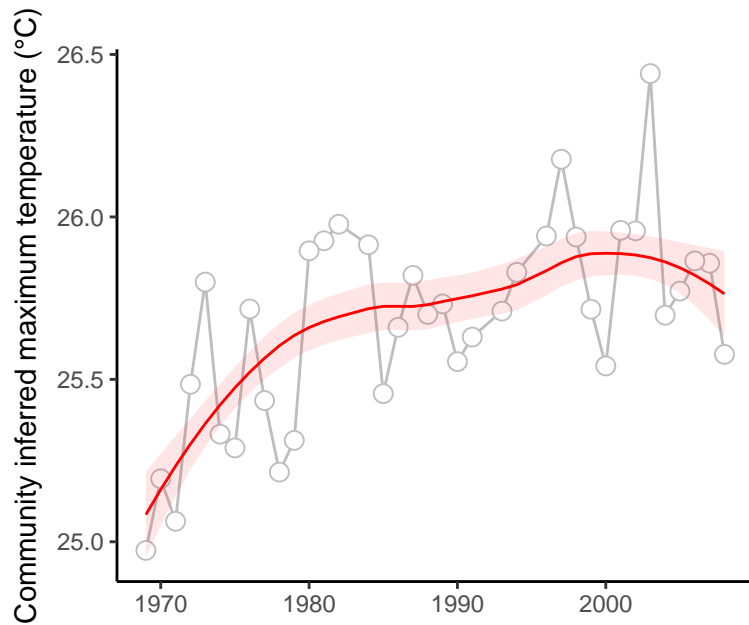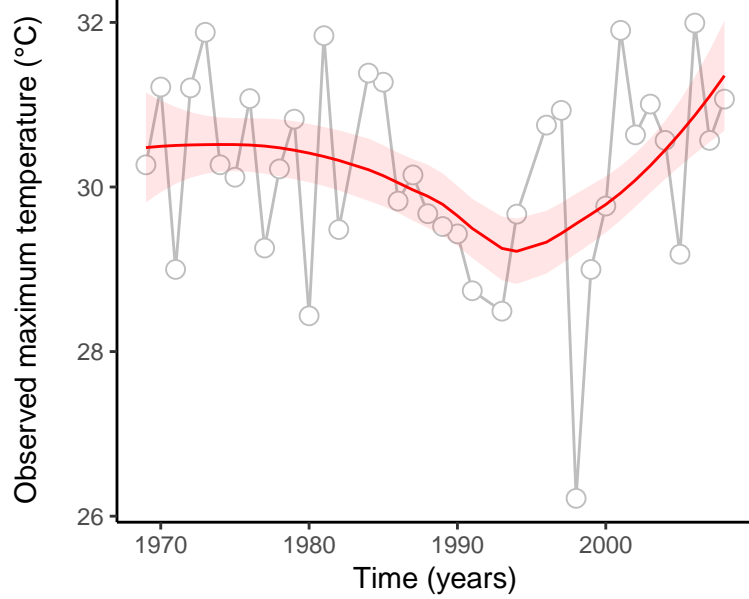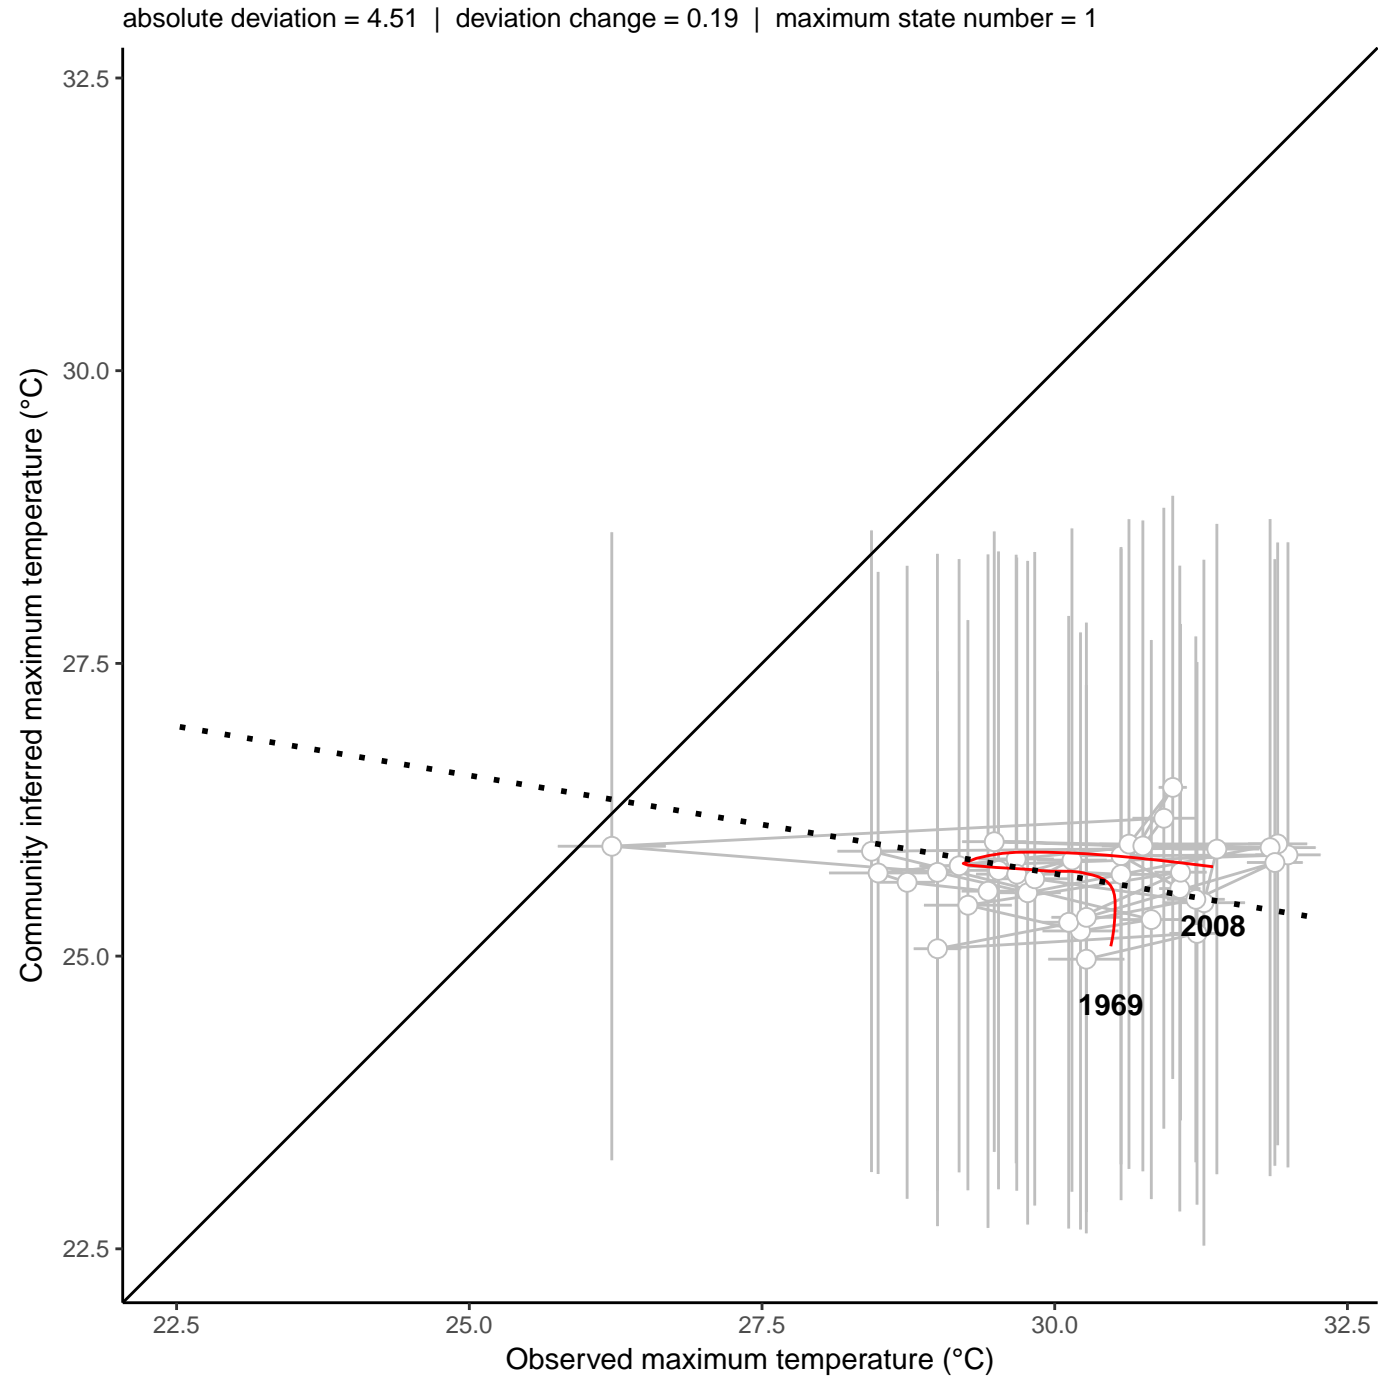

site : 840\_18\_12

absolute deviation = 1.46 | deviation change = 1.01 | maximum state number = 1

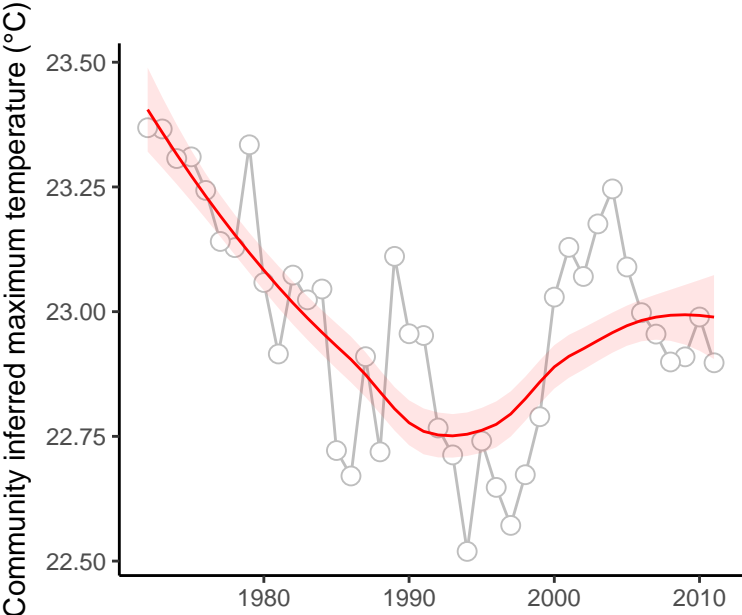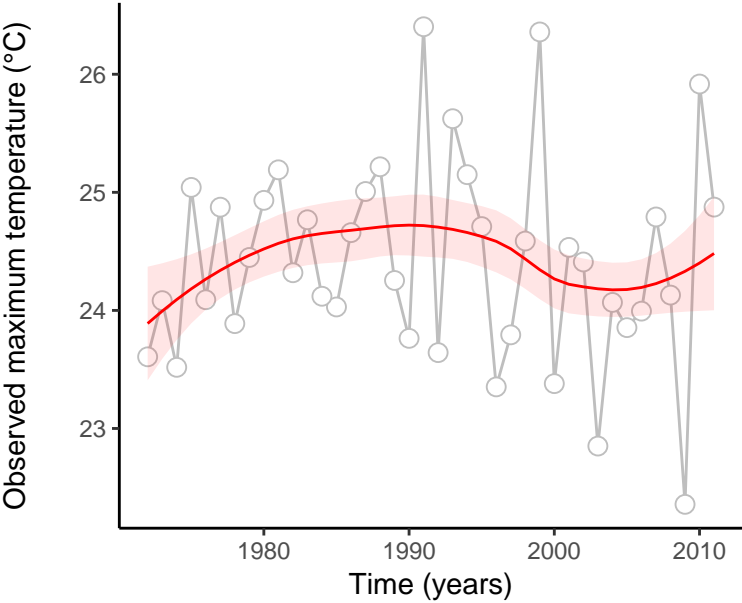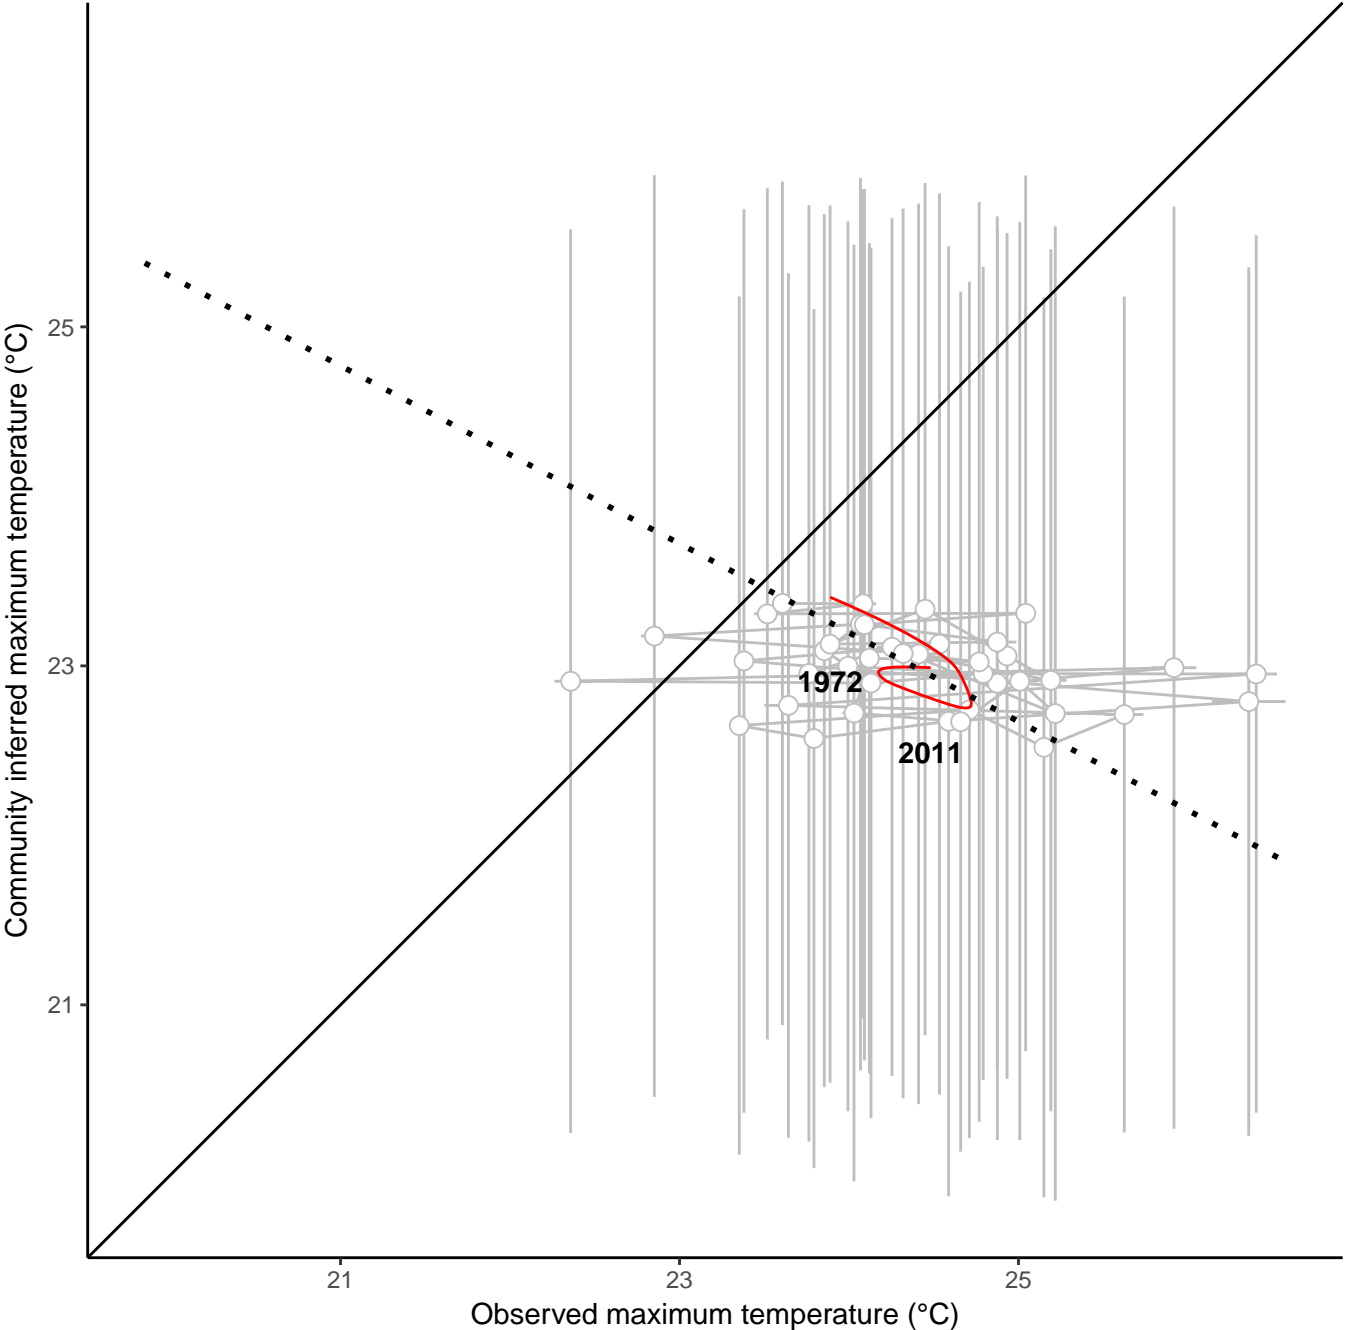

site : 840\_34\_39

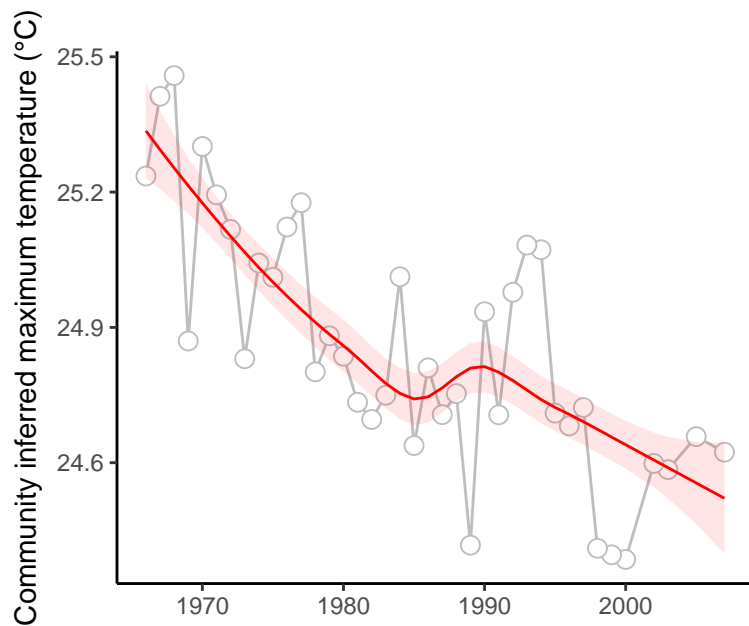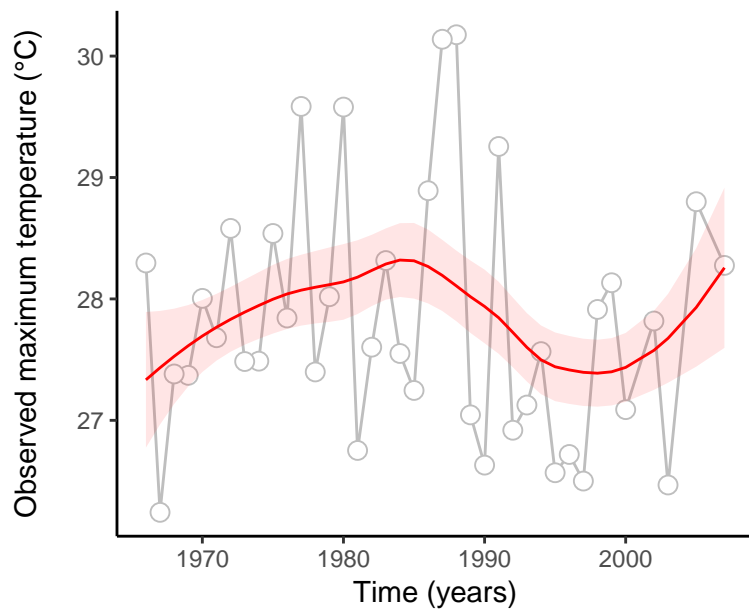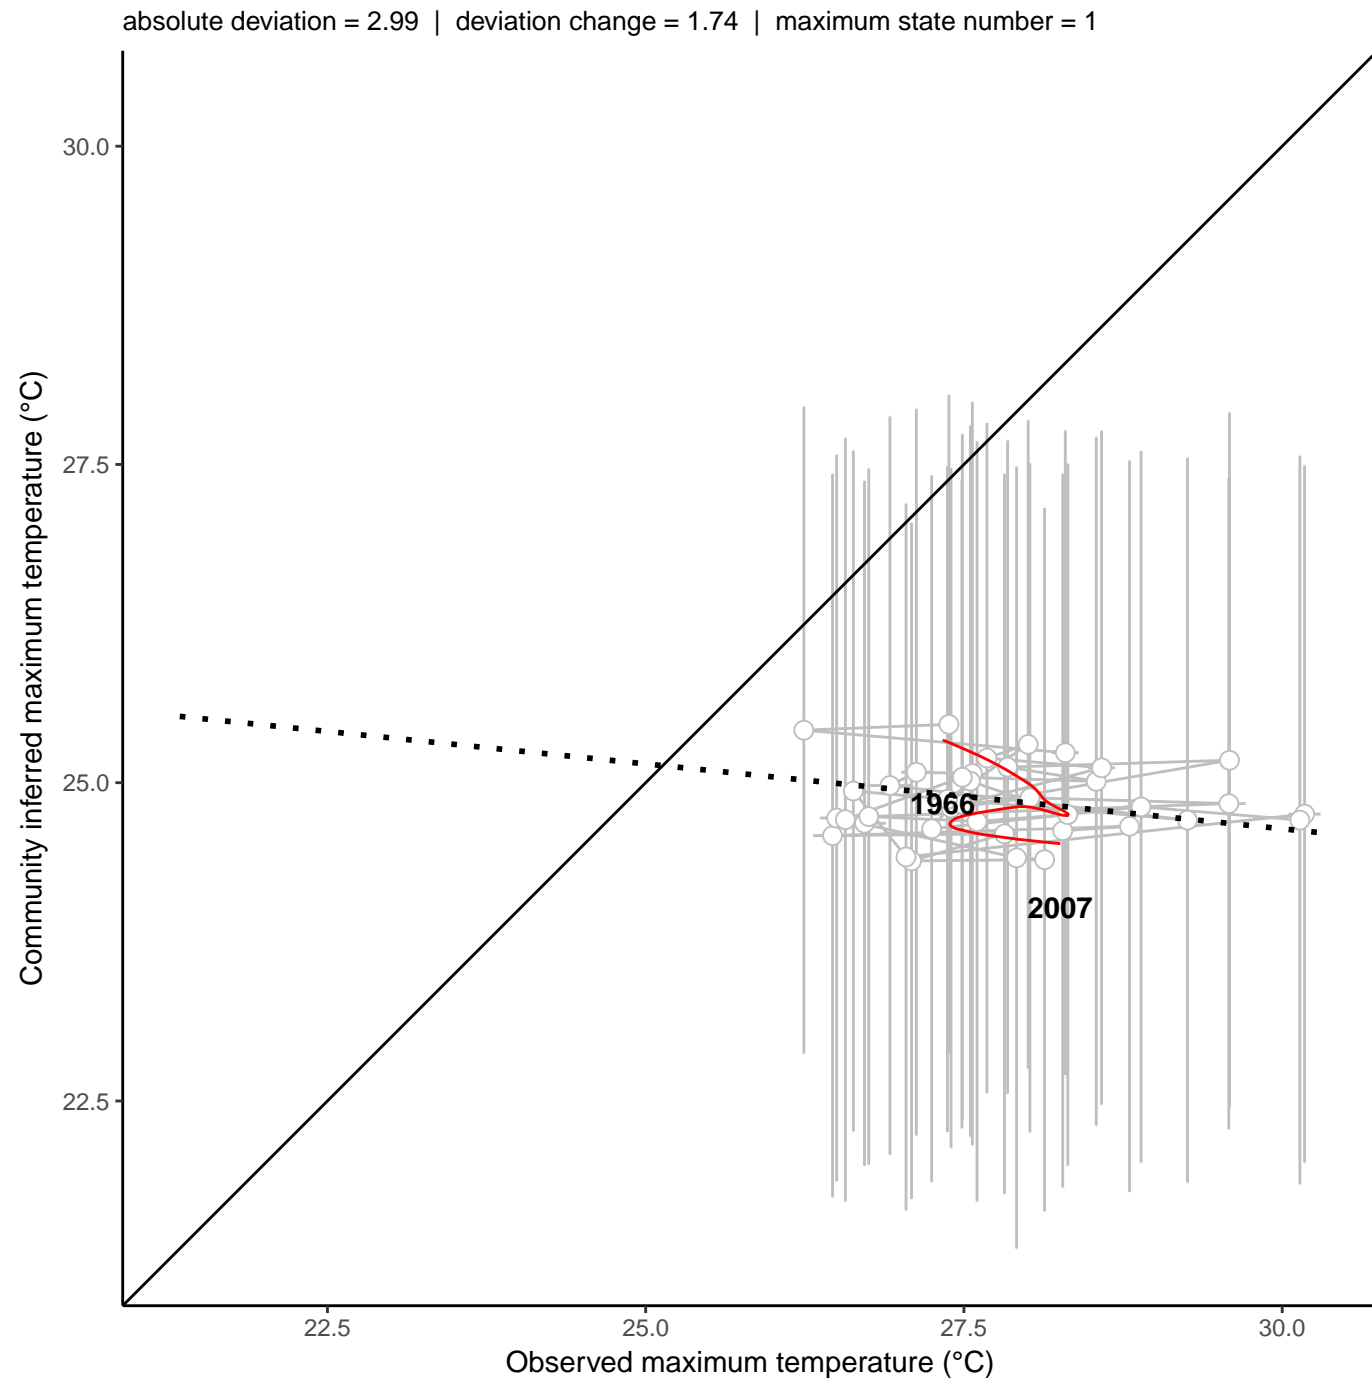



site : 840\_39\_2

absolute deviation = 4.17 | deviation change = 1.57 | maximum state number = 2

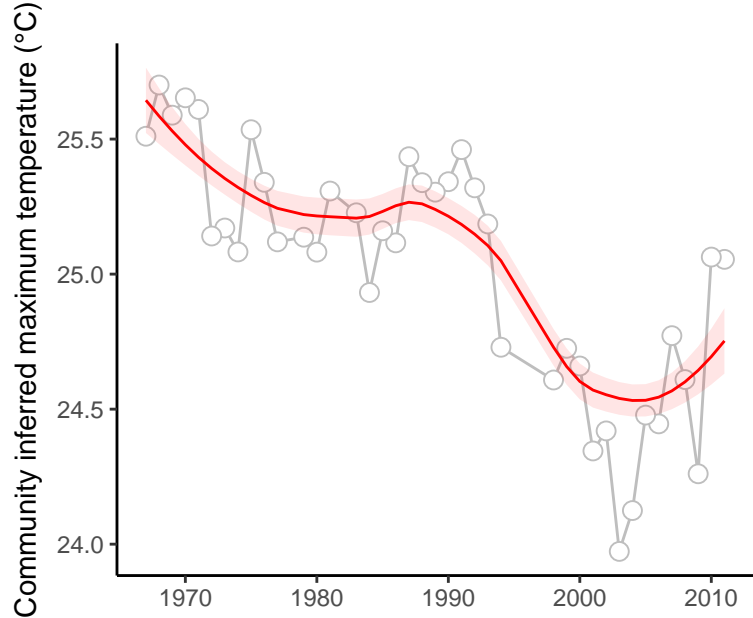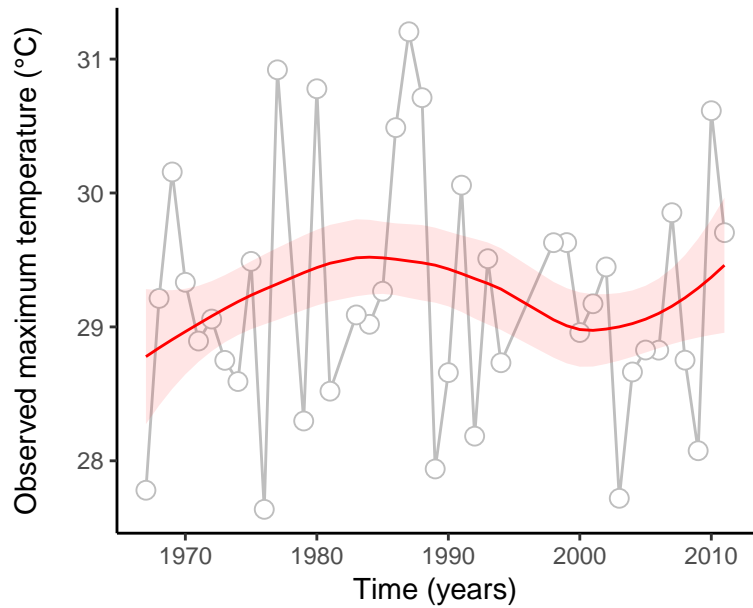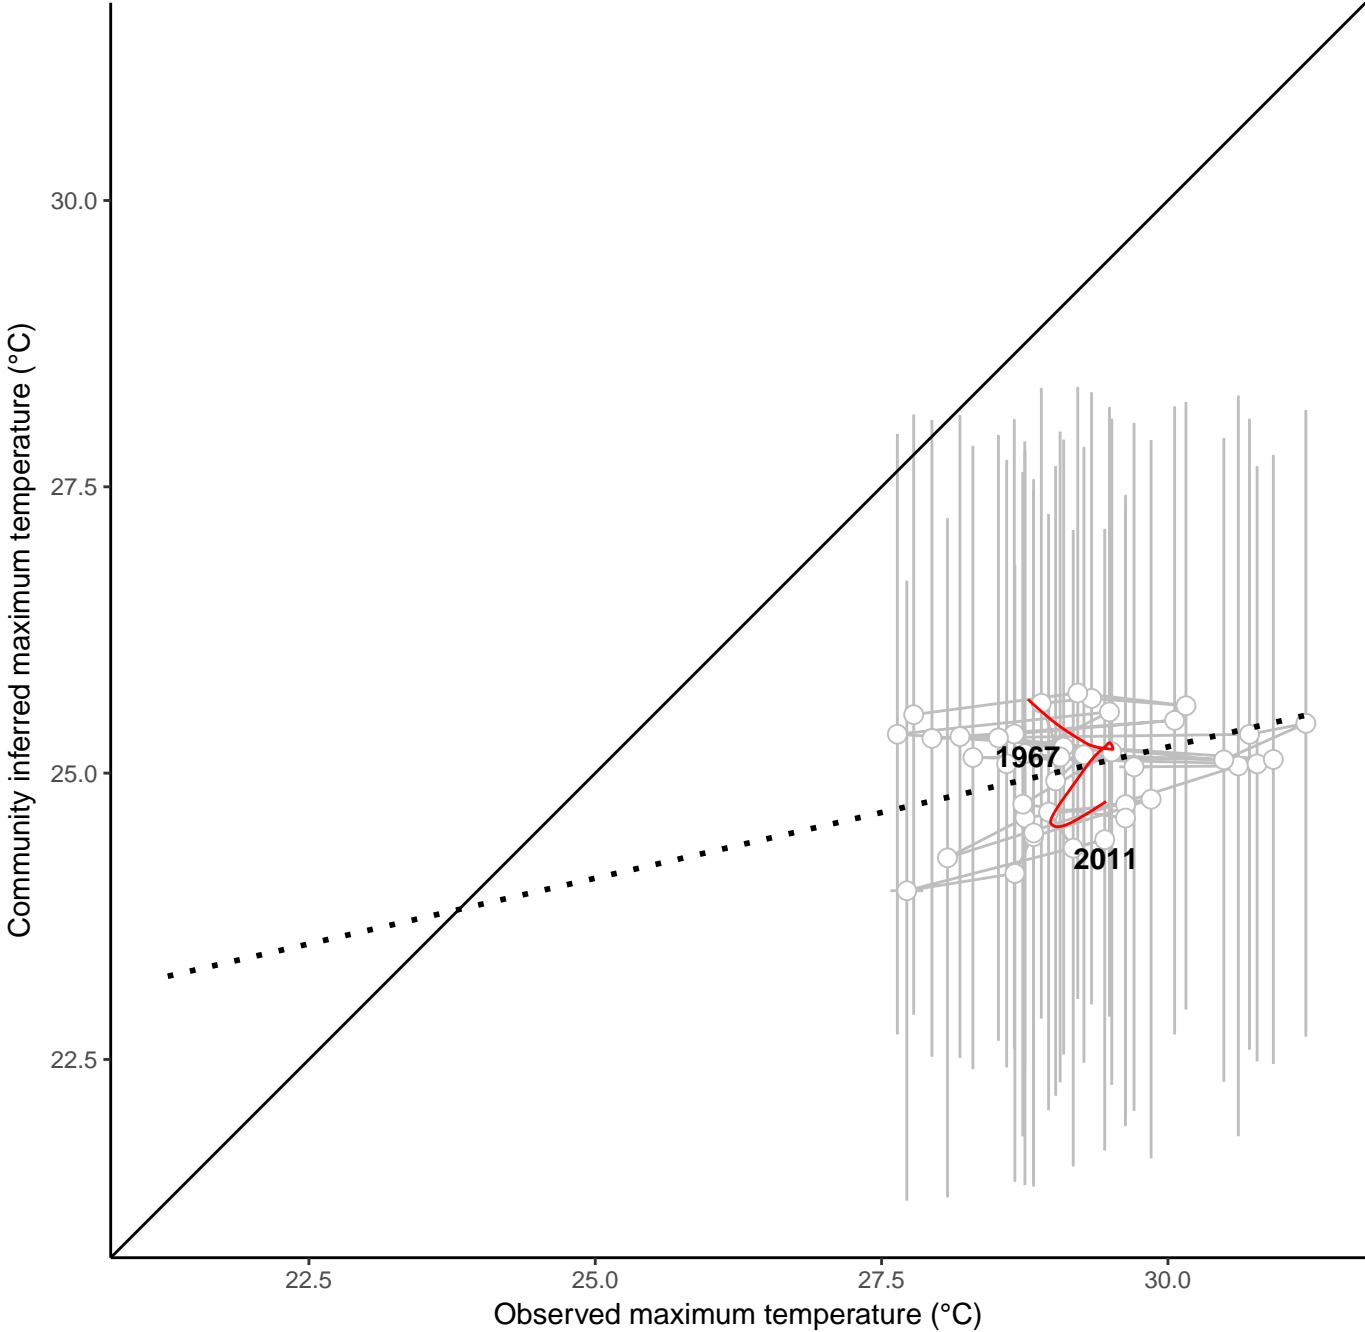

site : 840\_39\_44

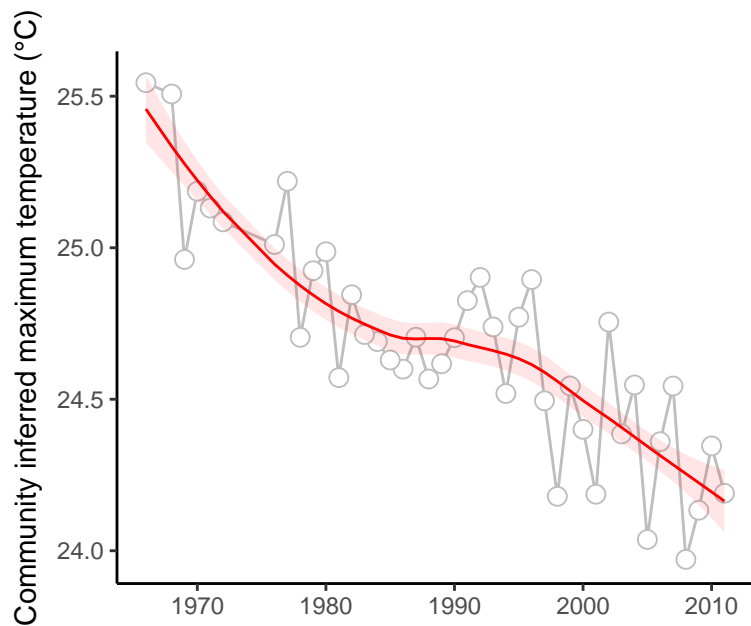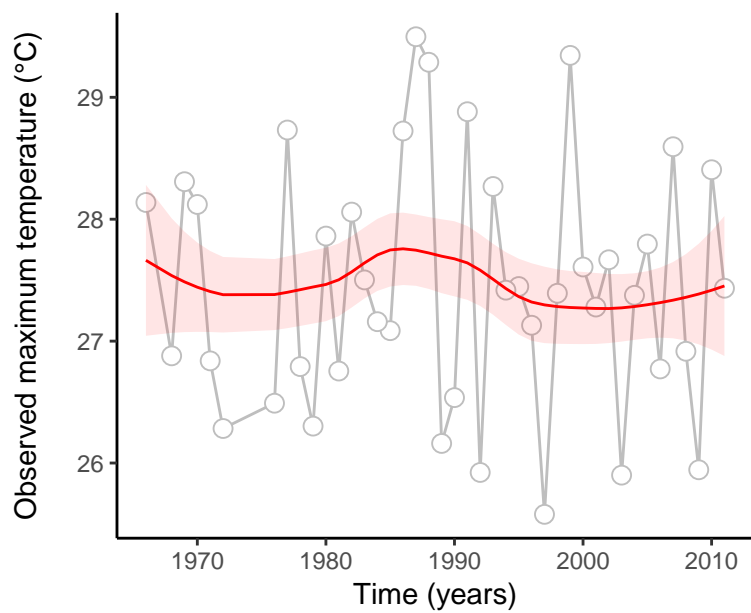

absolute deviation = 2.78 | deviation change = 1.08 | maximum state number = 1

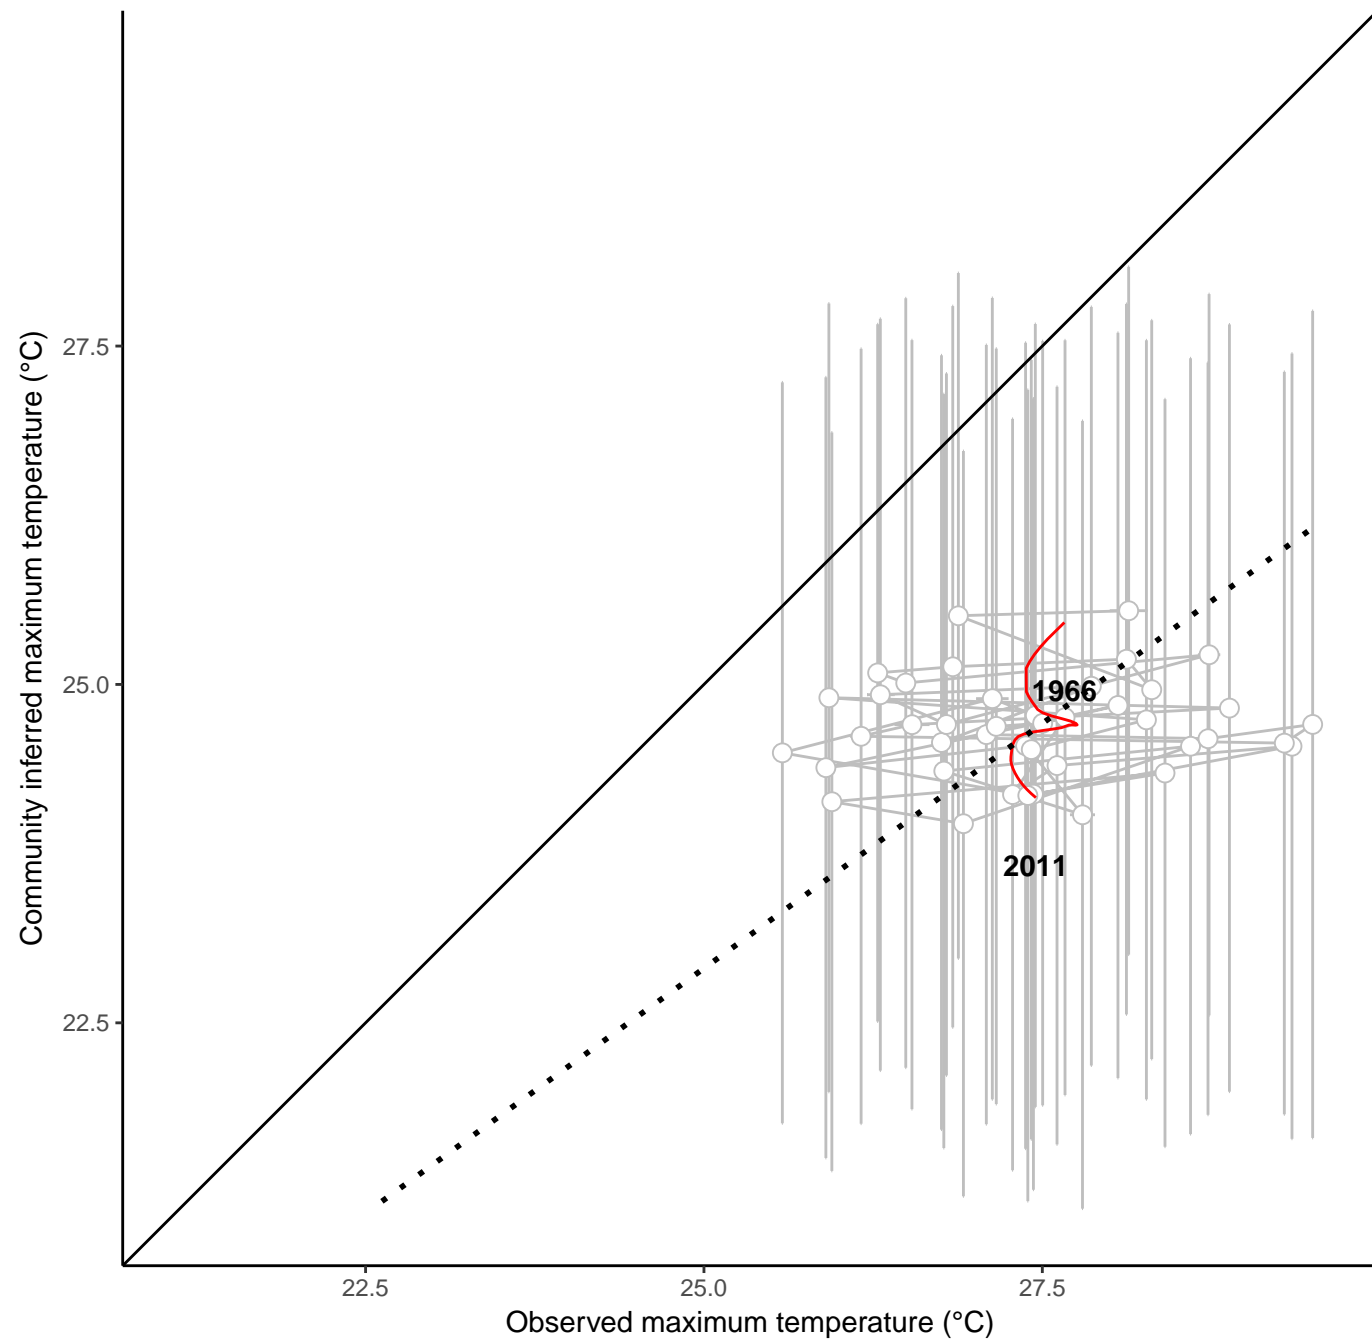

site : 840\_52\_4

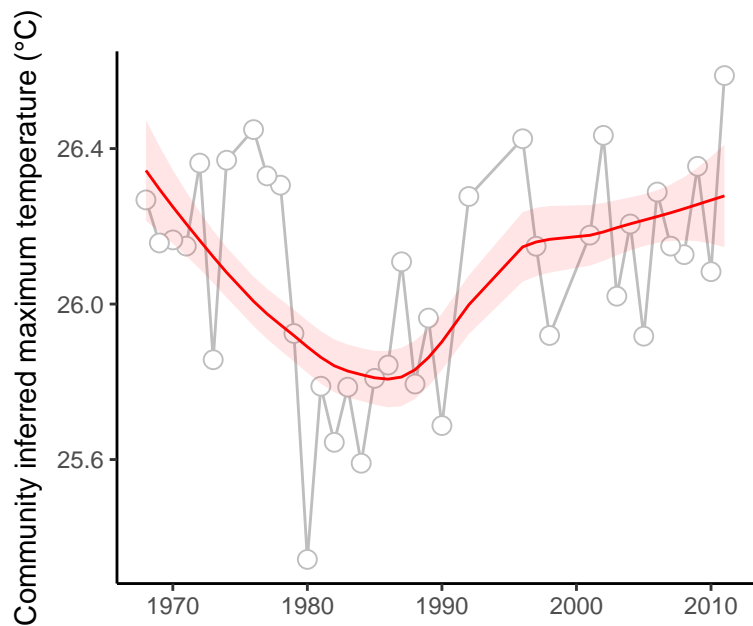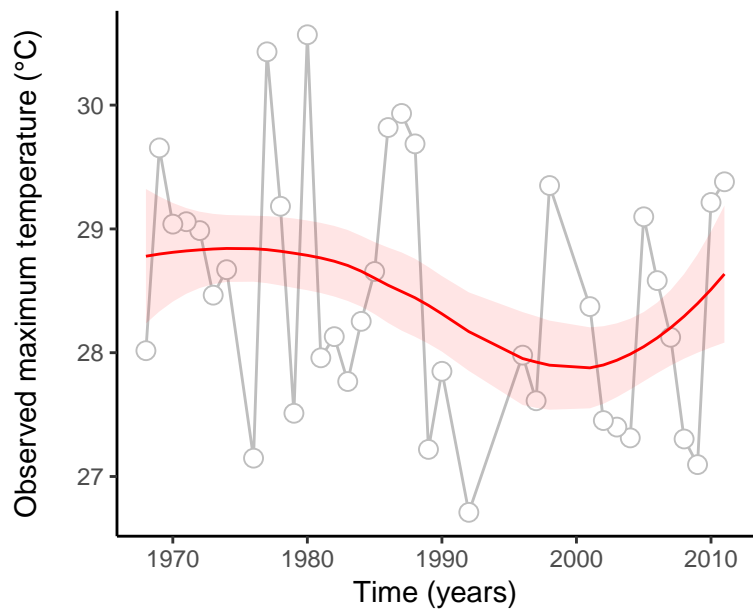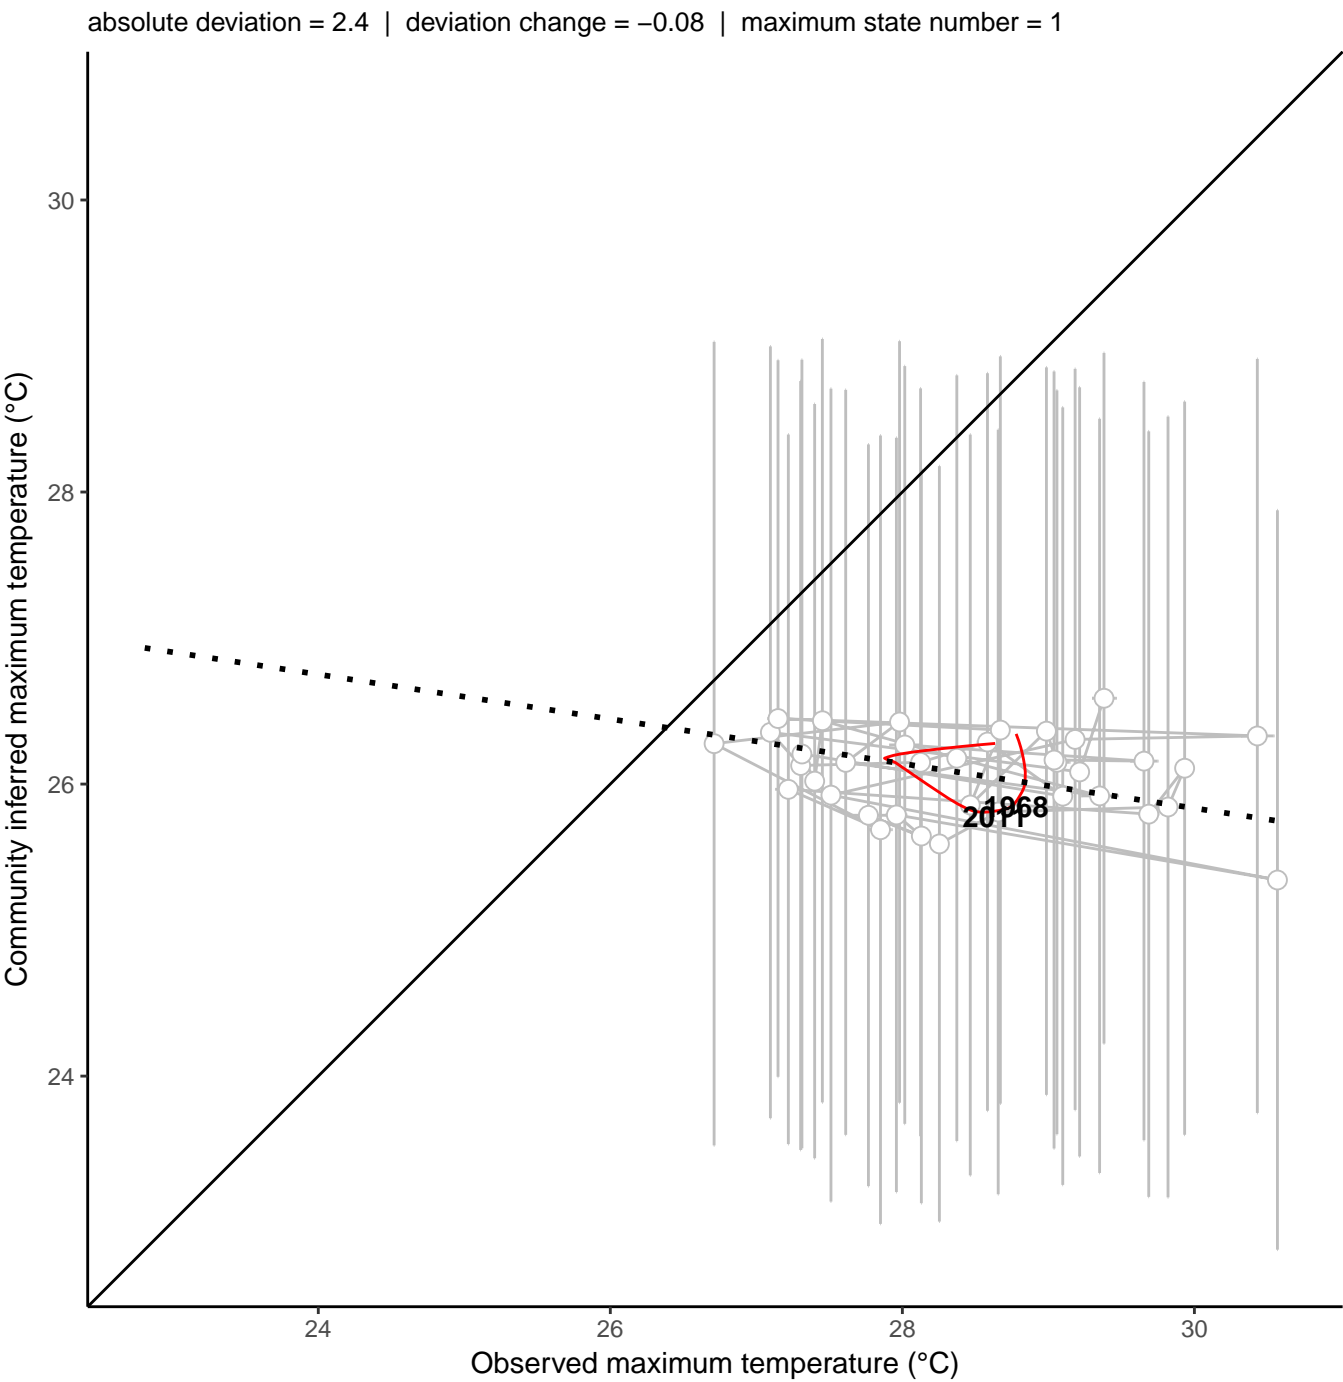

site : 840\_6\_33

absolute deviation = 3.48 | deviation change = 0.57 | maximum state number = 2

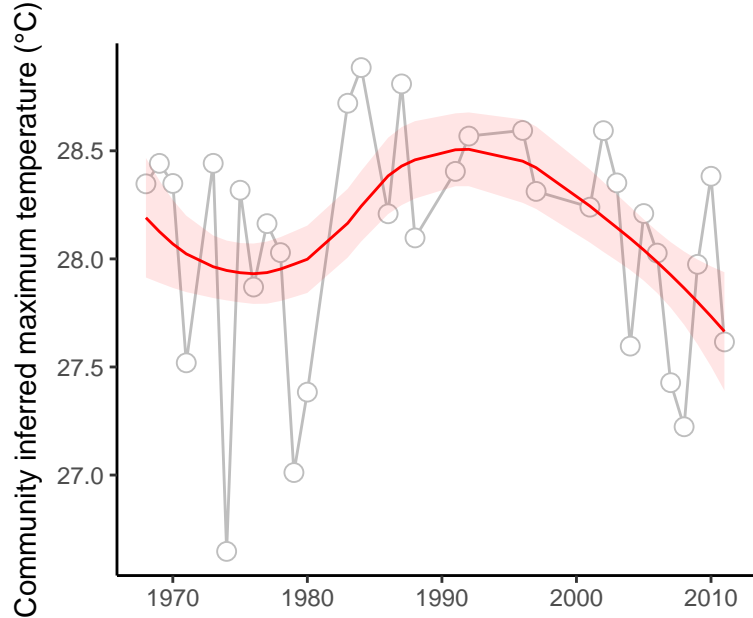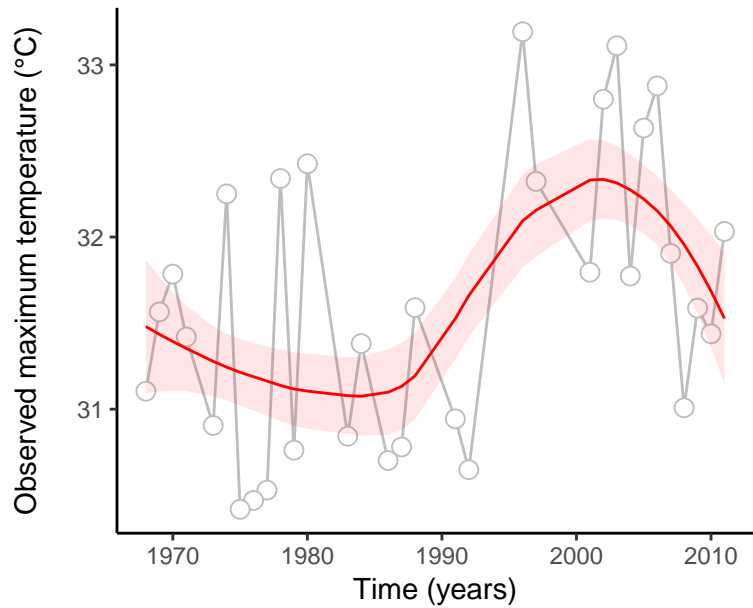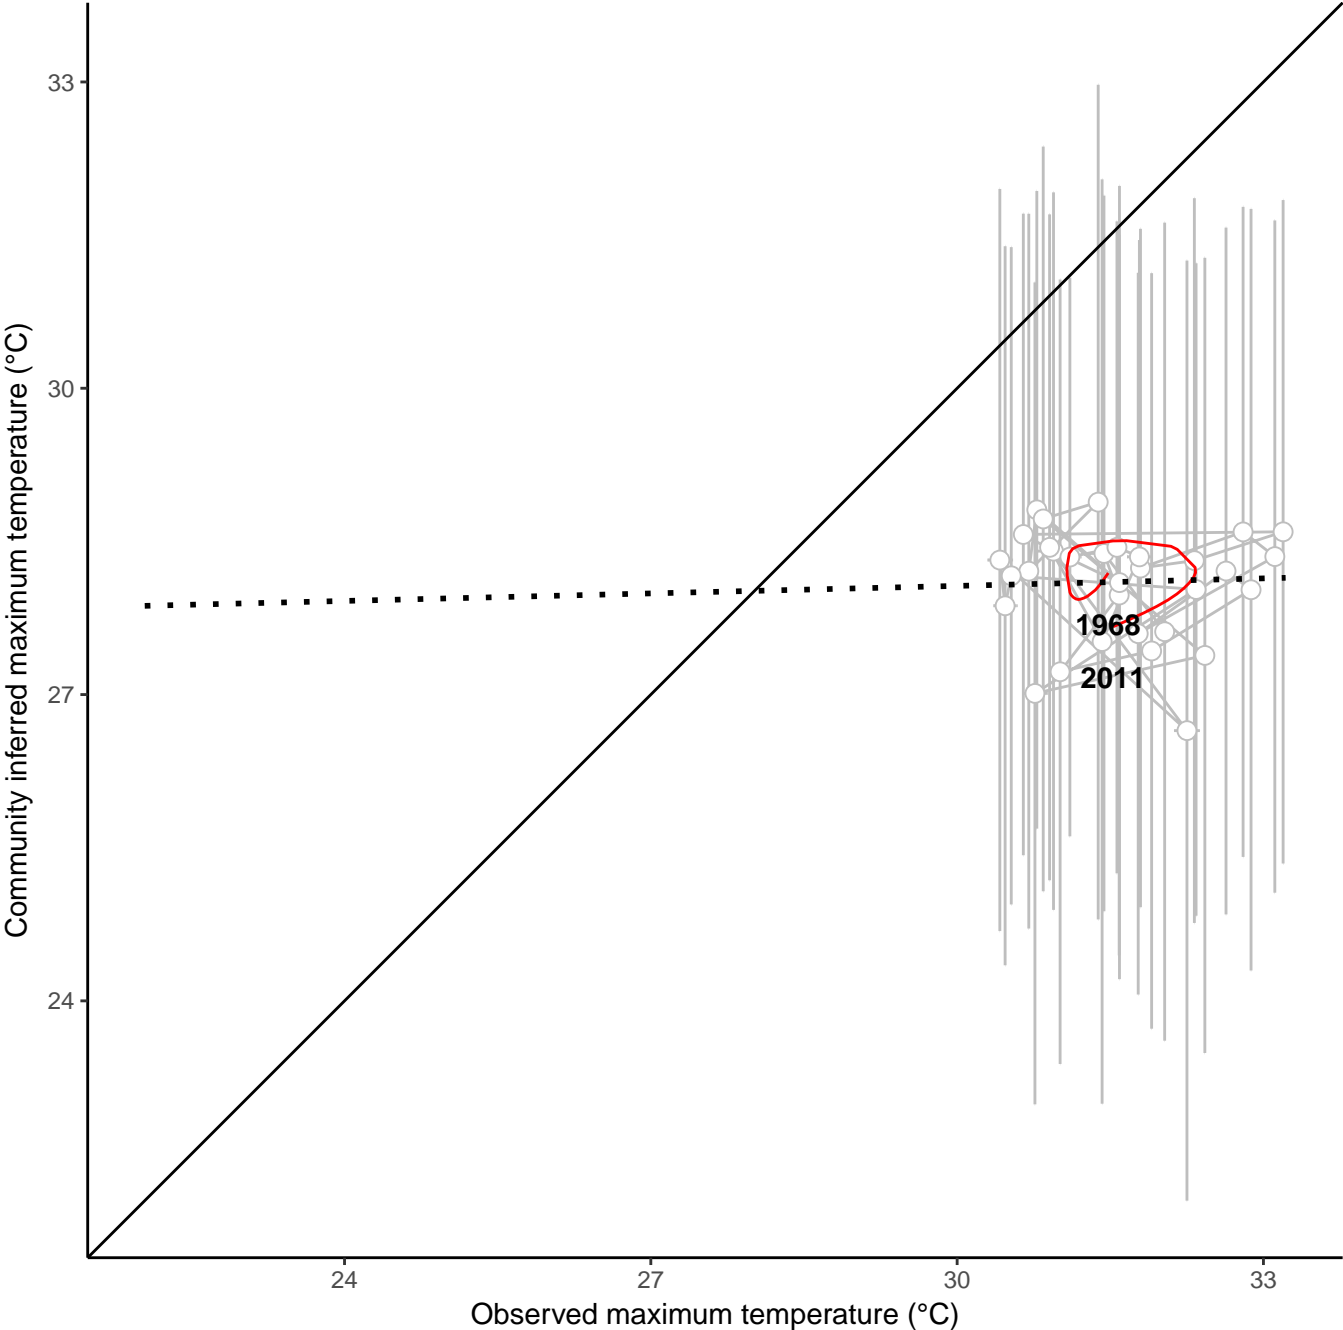

site : 840\_72\_56

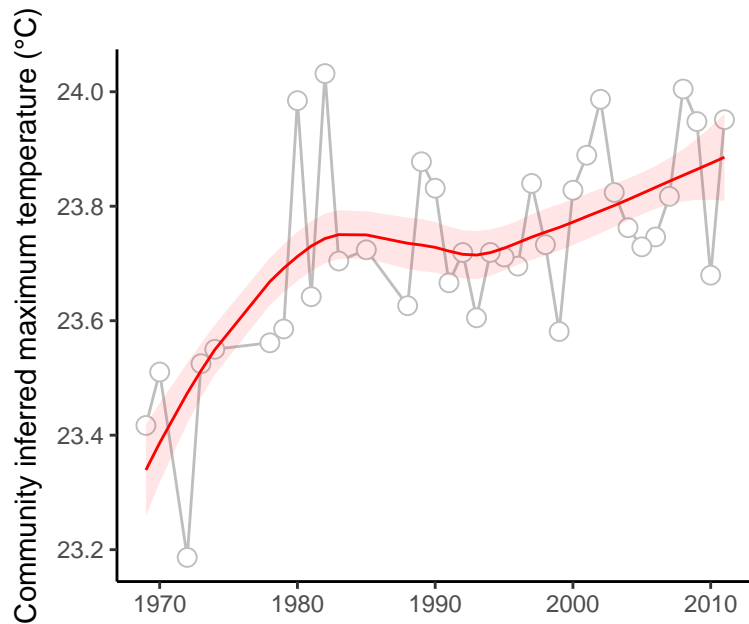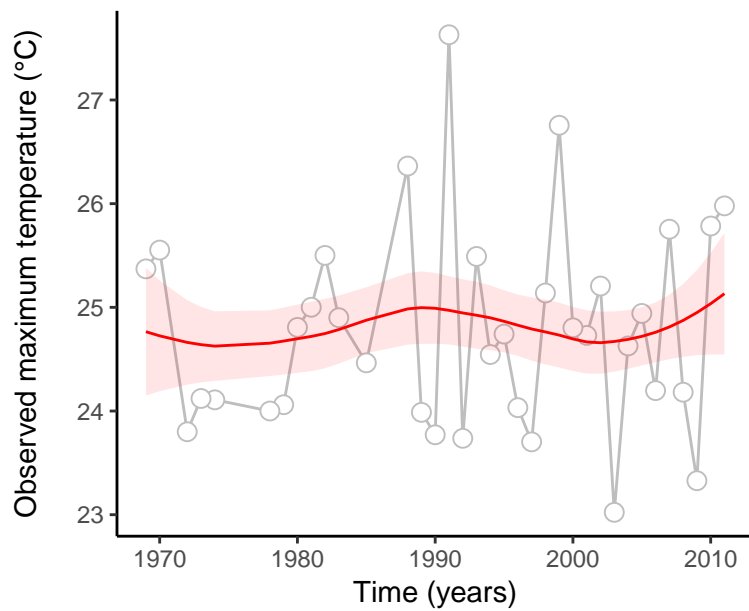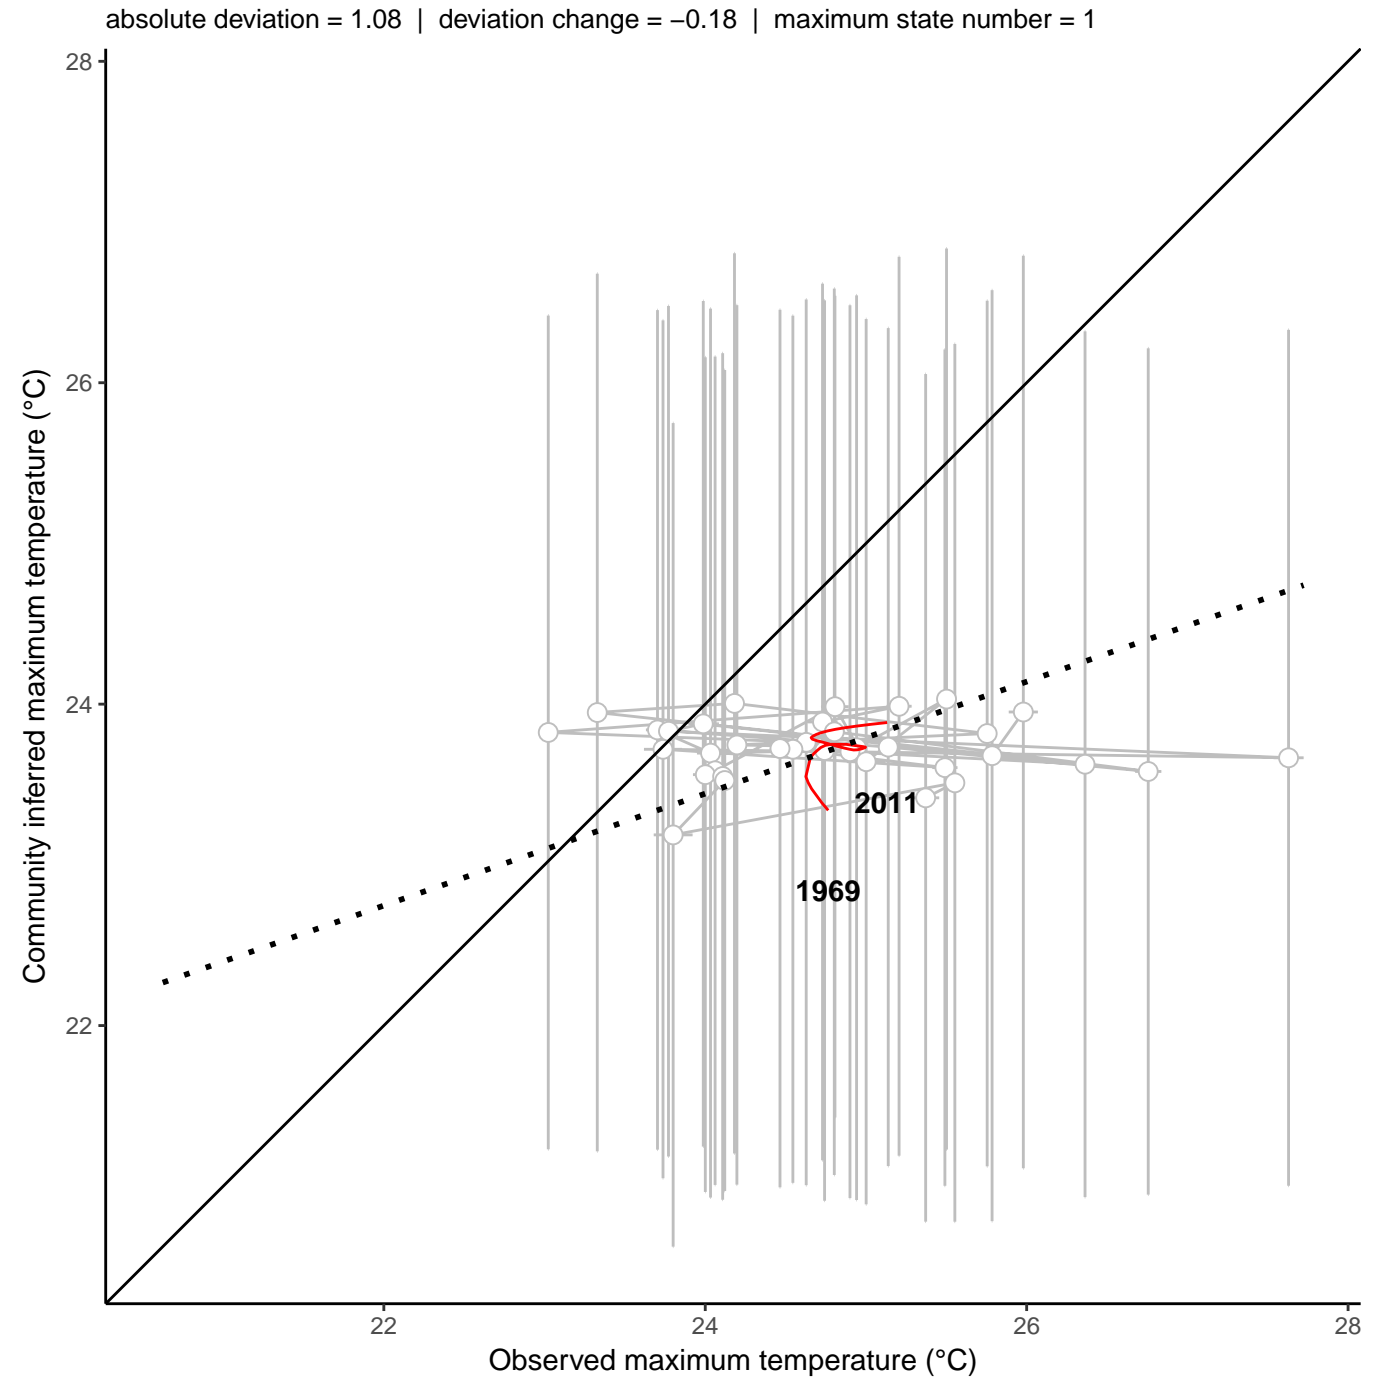

site : 840\_14\_77

absolute deviation = 3.53 | deviation change = 1.32 | maximum state number = 1

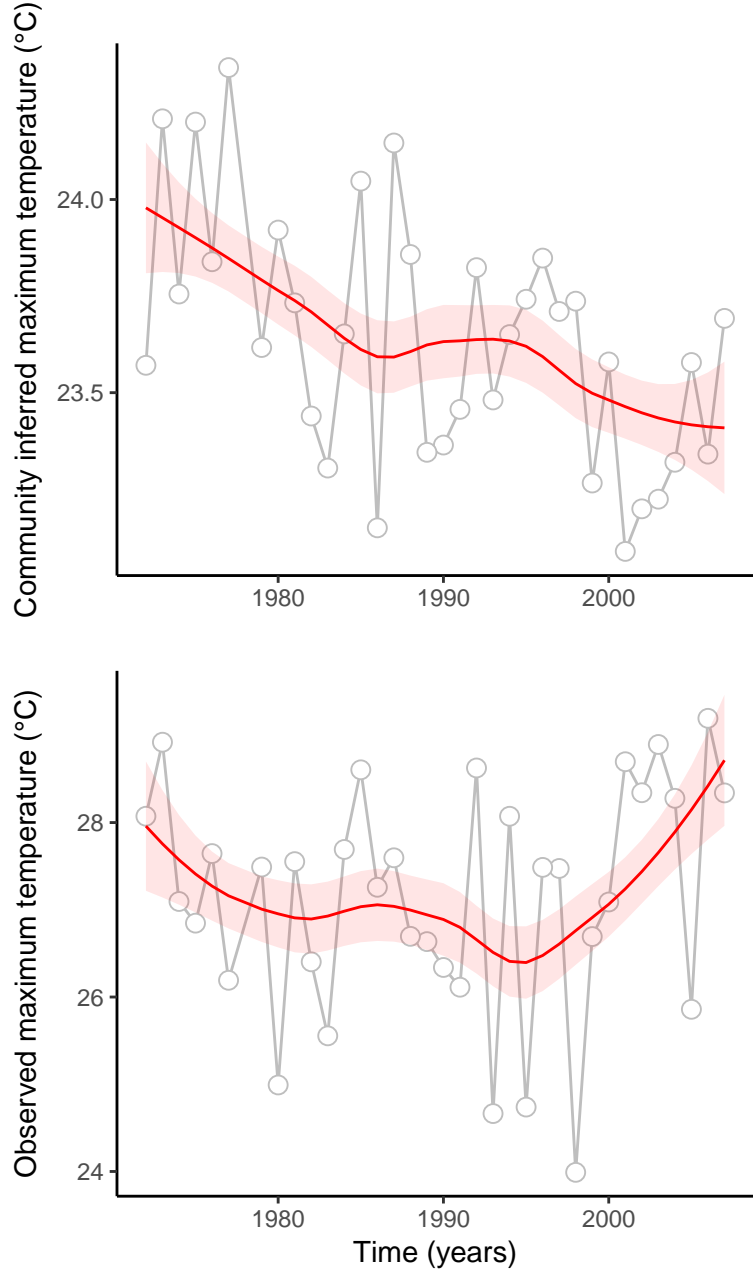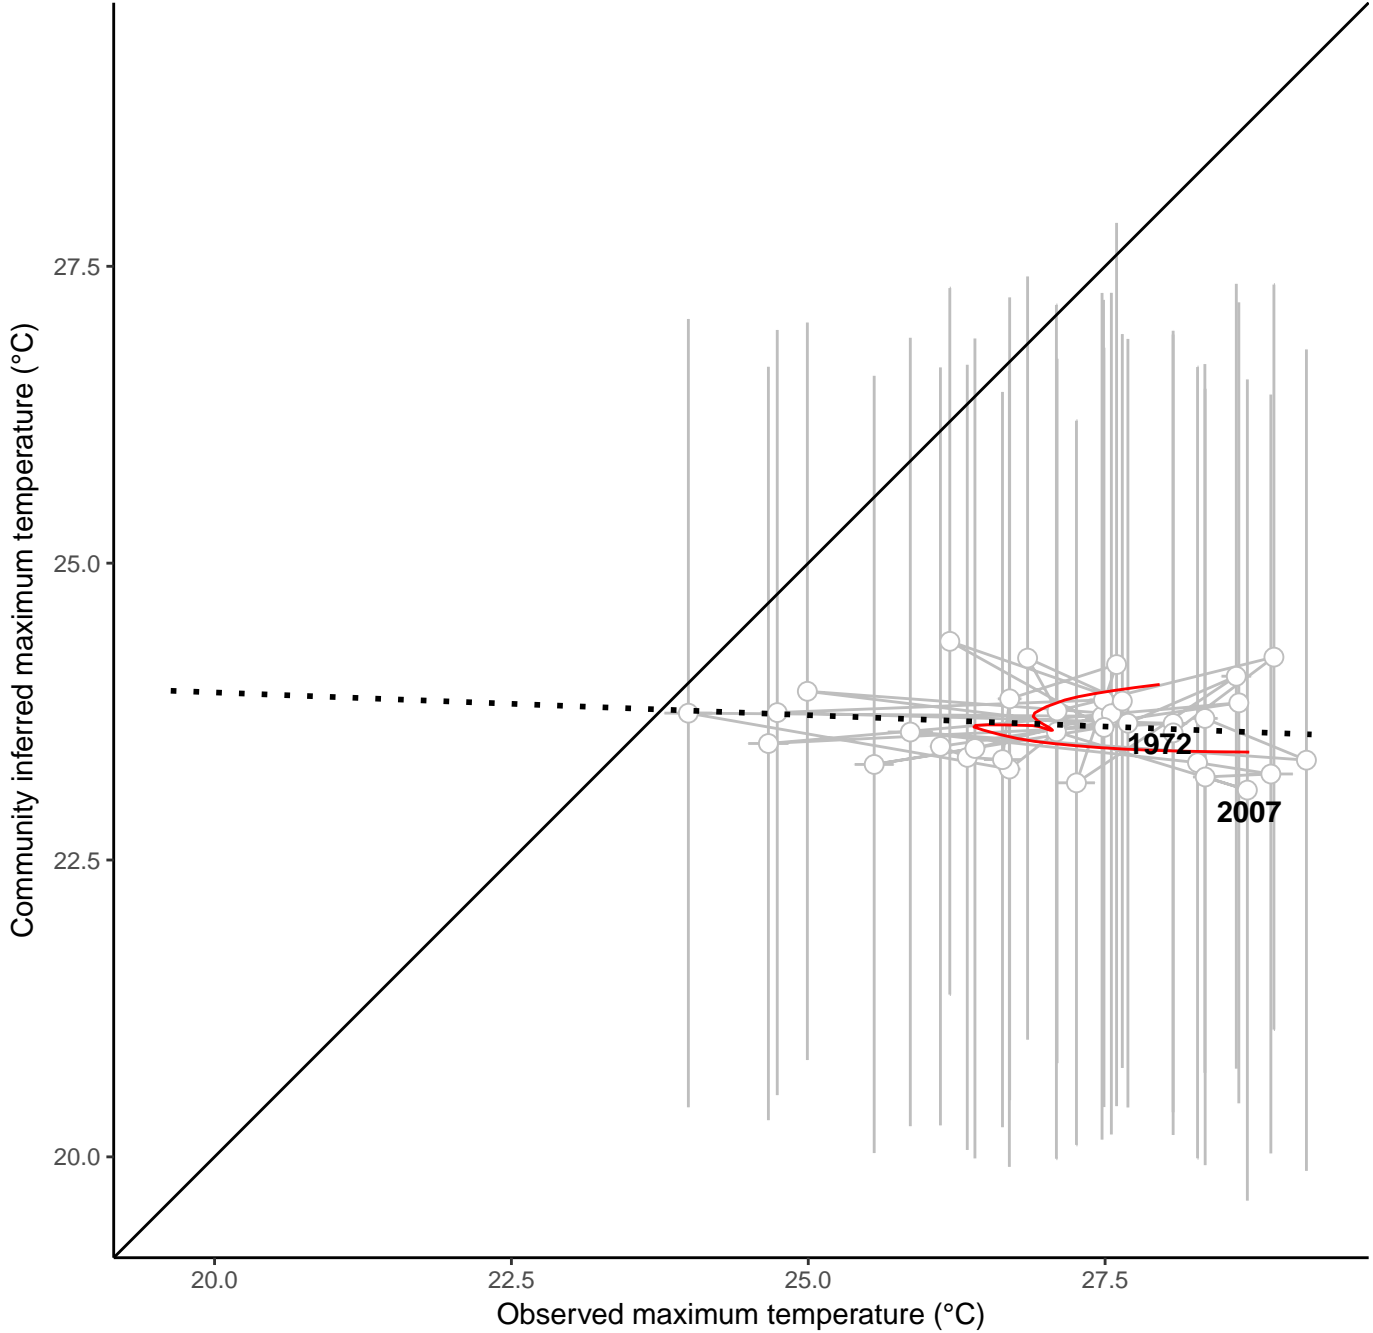

site : 840\_17\_16

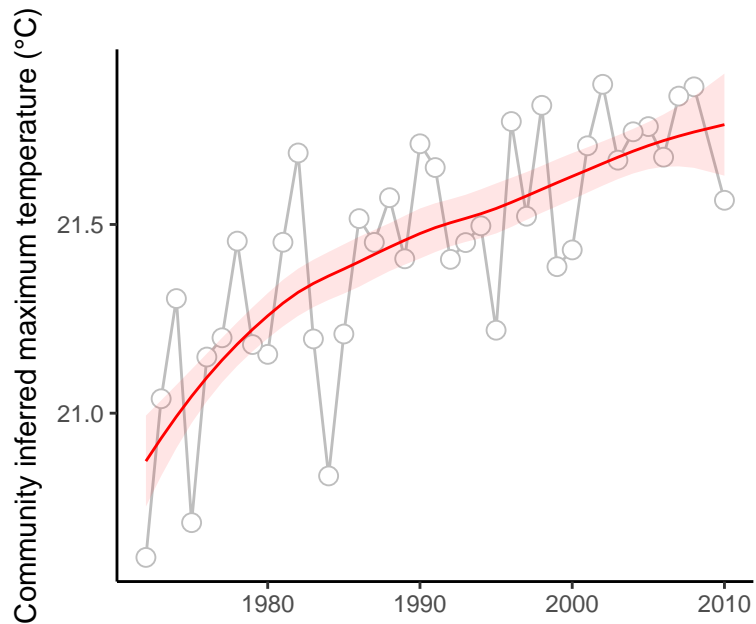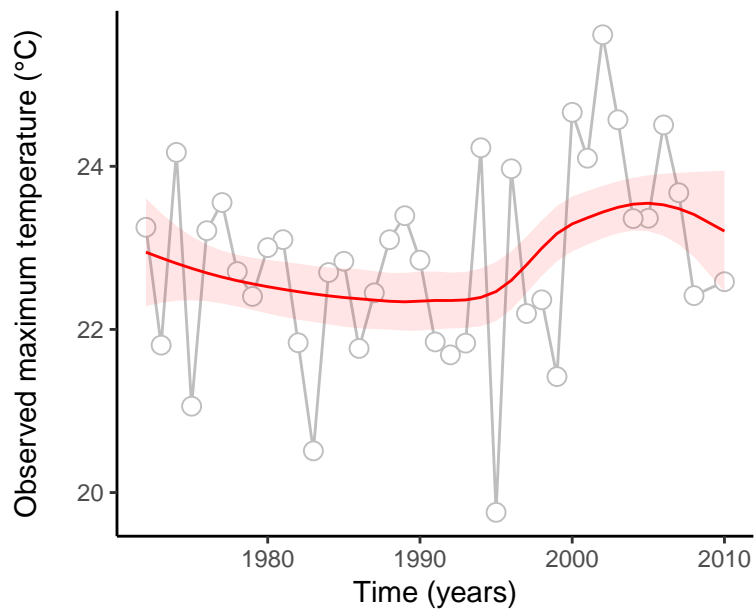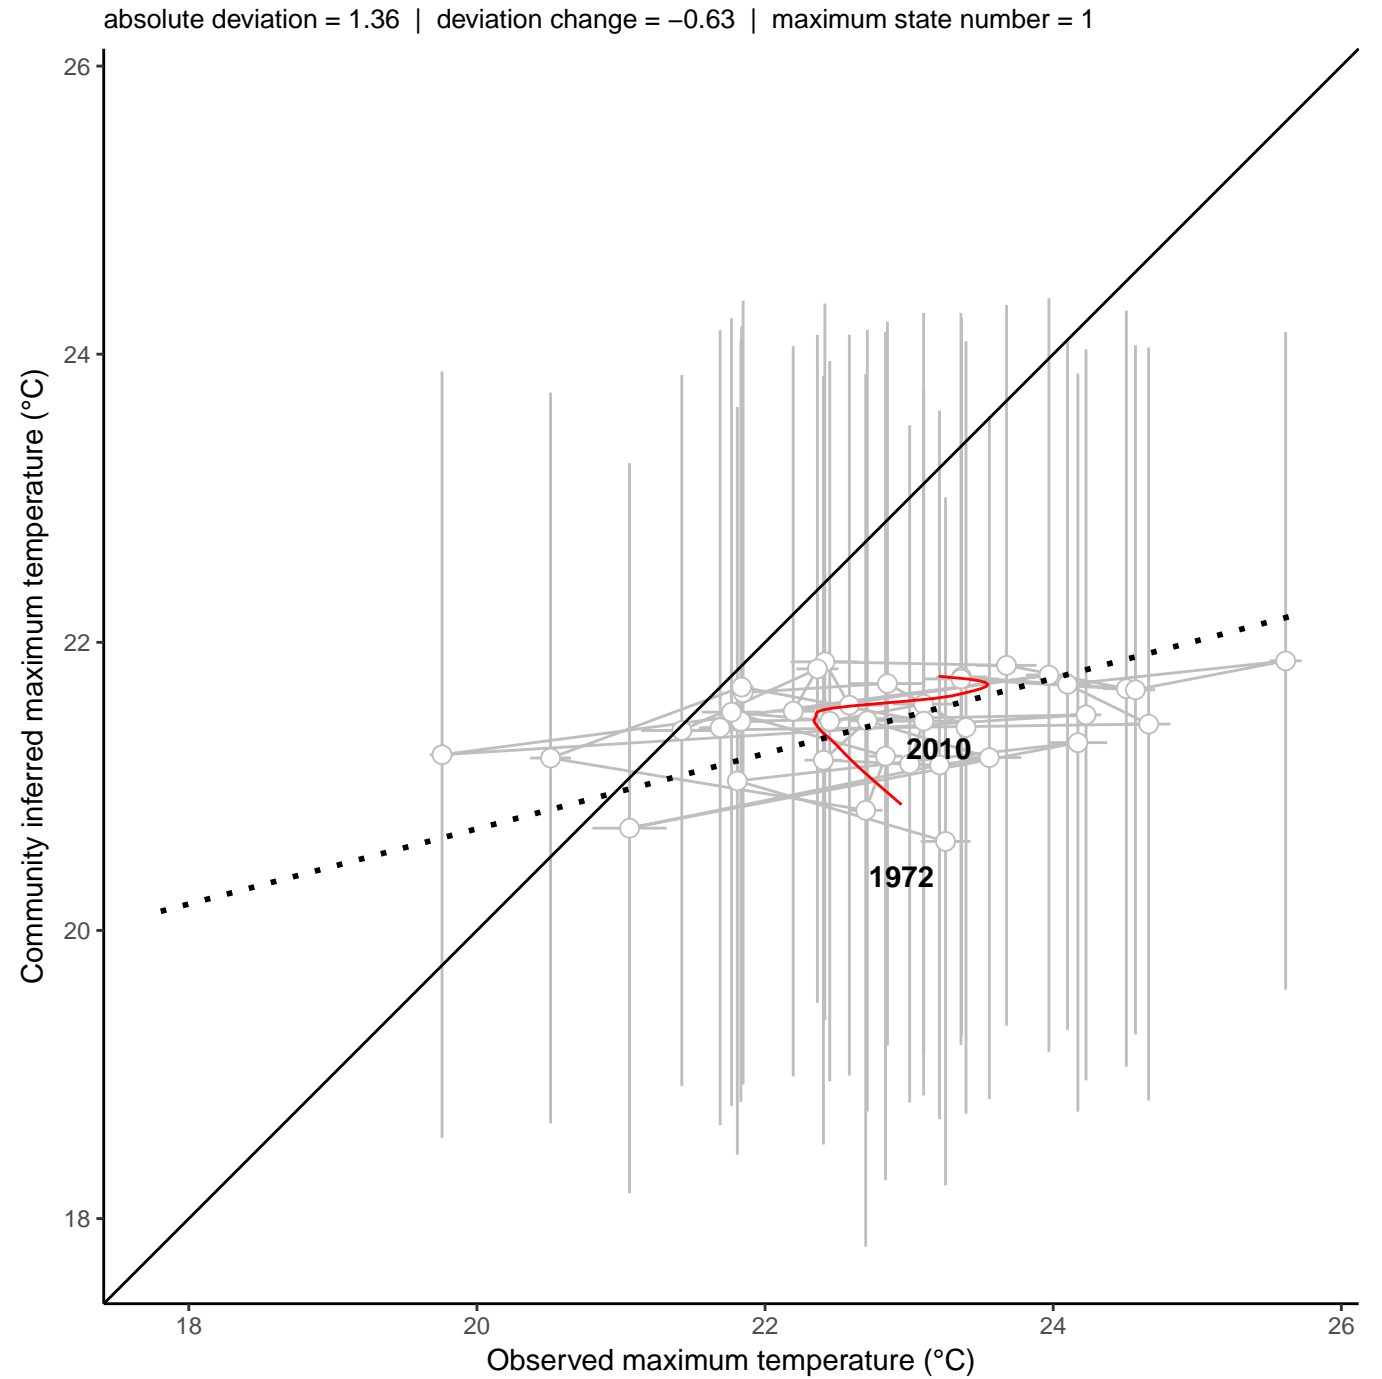

site : 840\_25\_5

absolute deviation = 5 | deviation change = 0.7 | maximum state number = 1

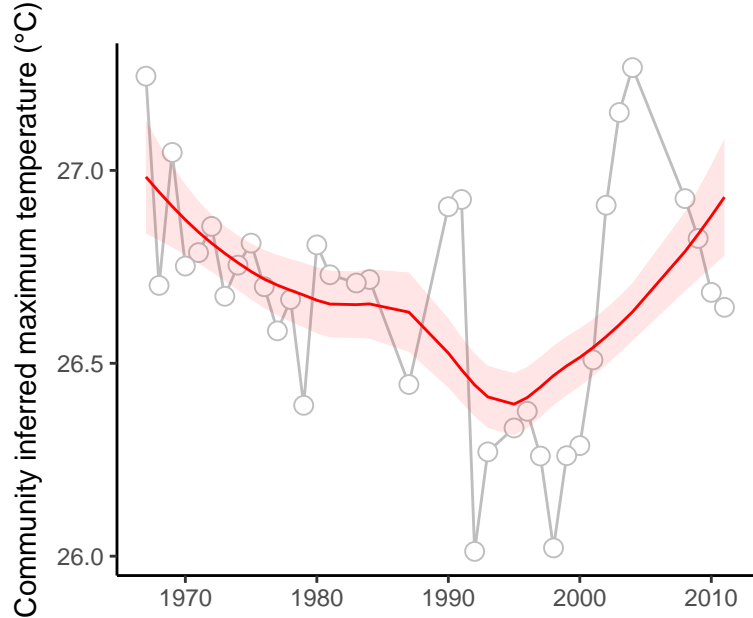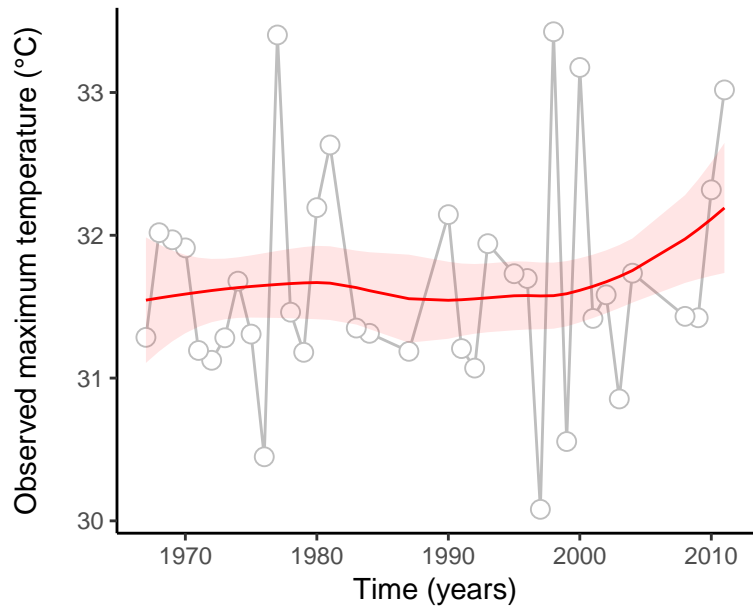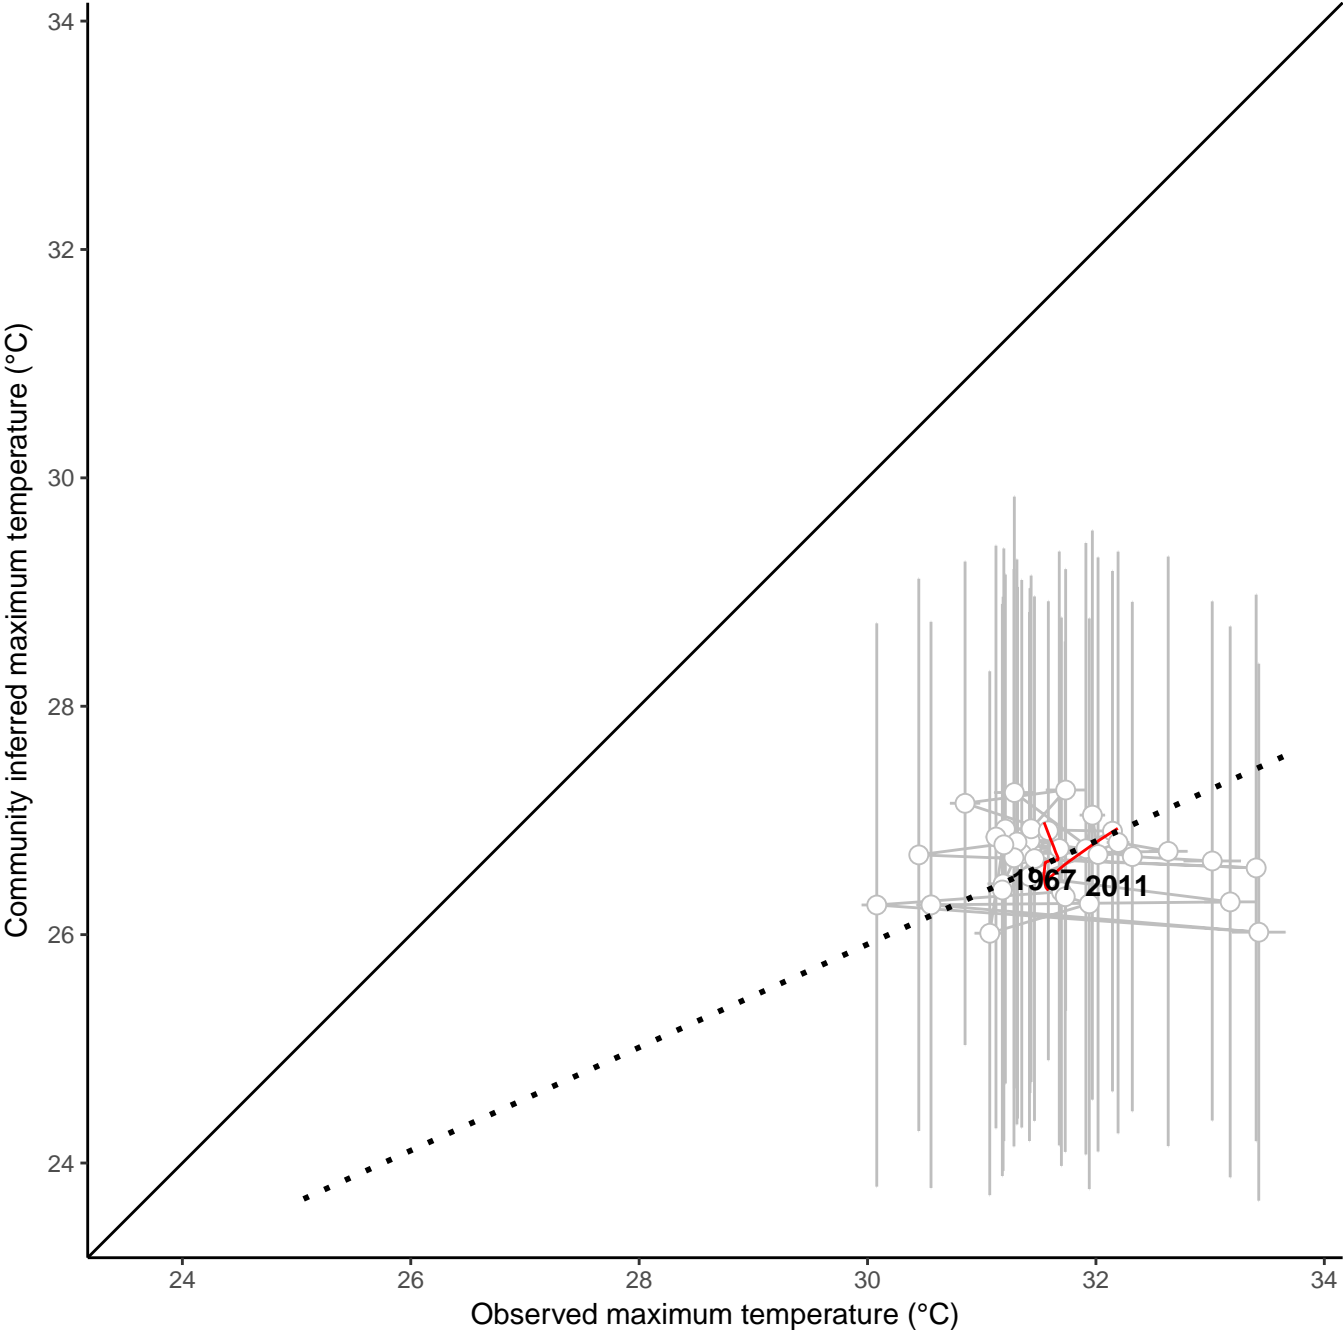



site : 840\_27\_31

absolute deviation = 4.94 | deviation change = 3.05 | maximum state number = 1

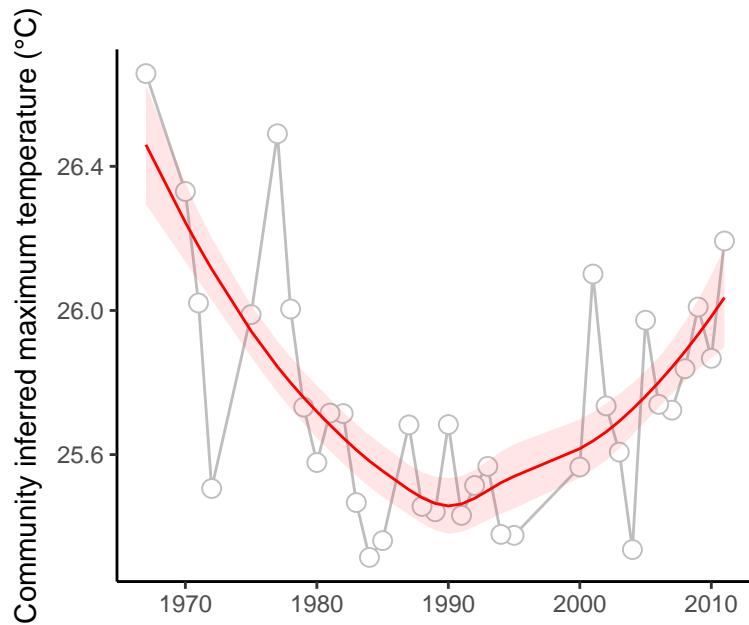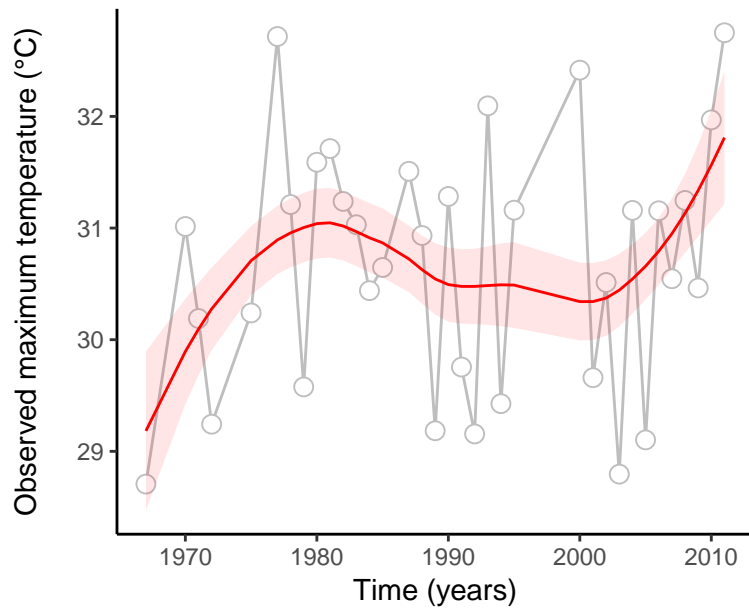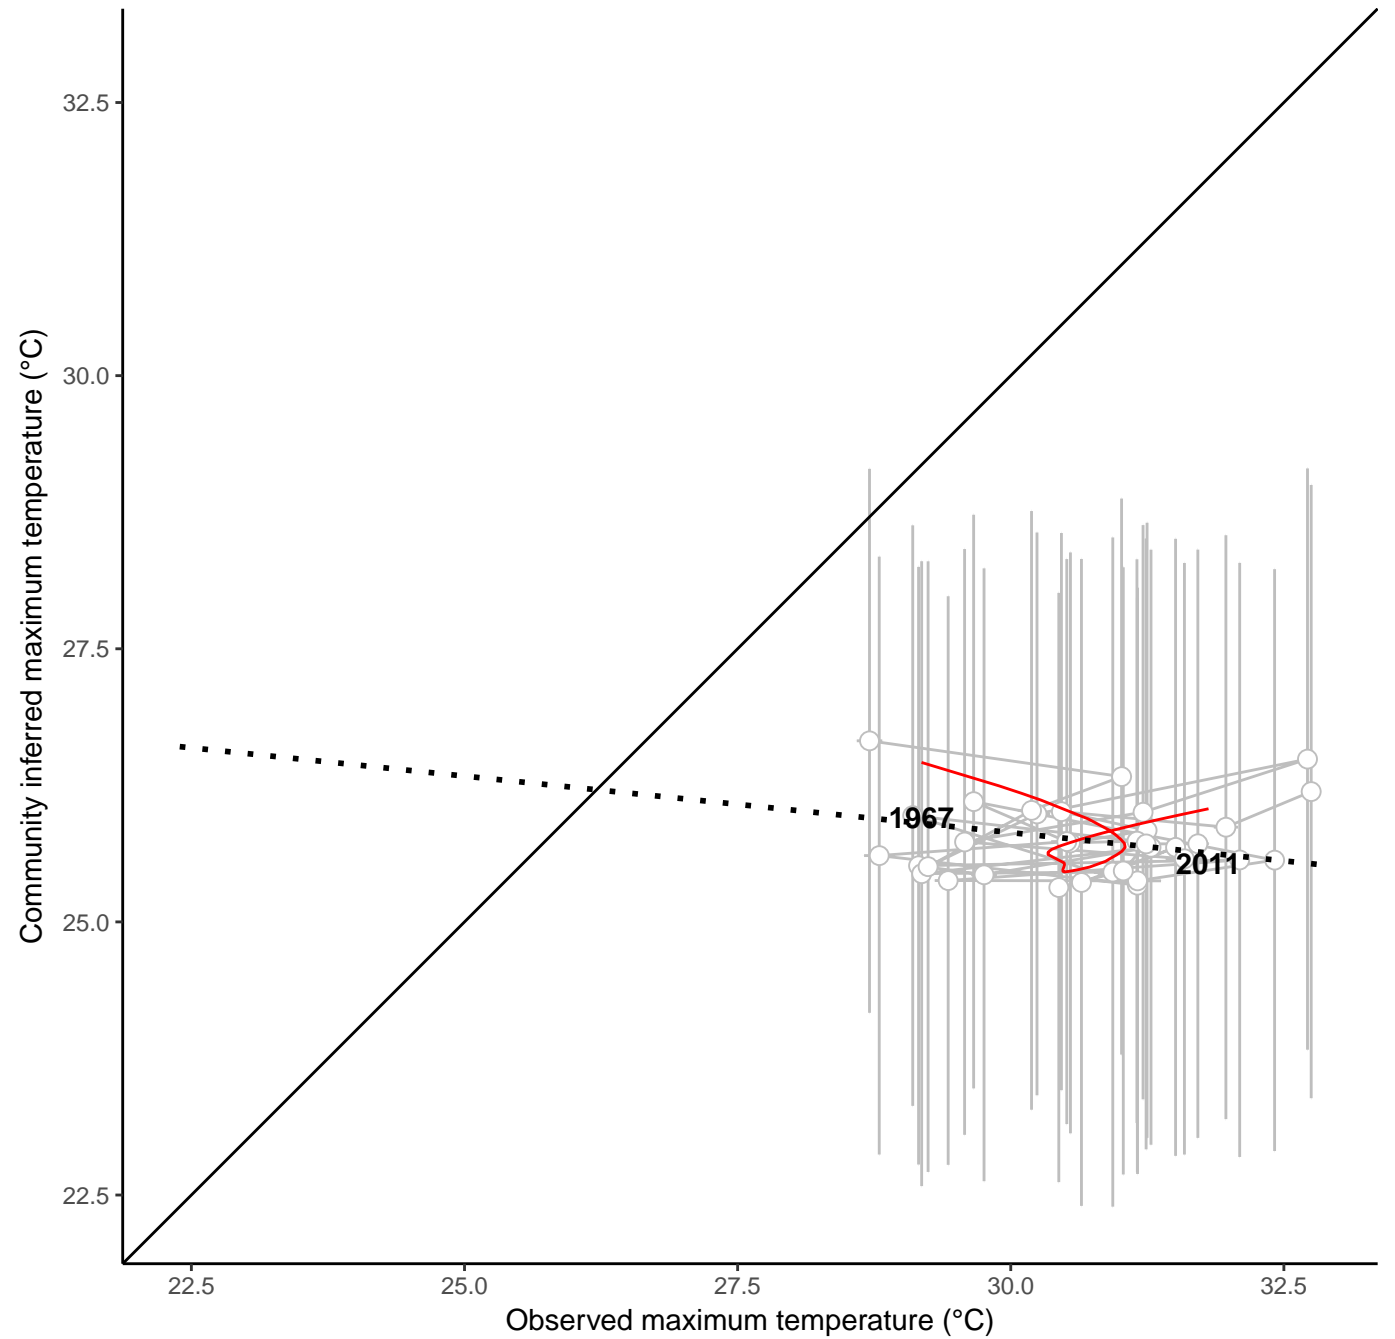

site : 840\_38\_34

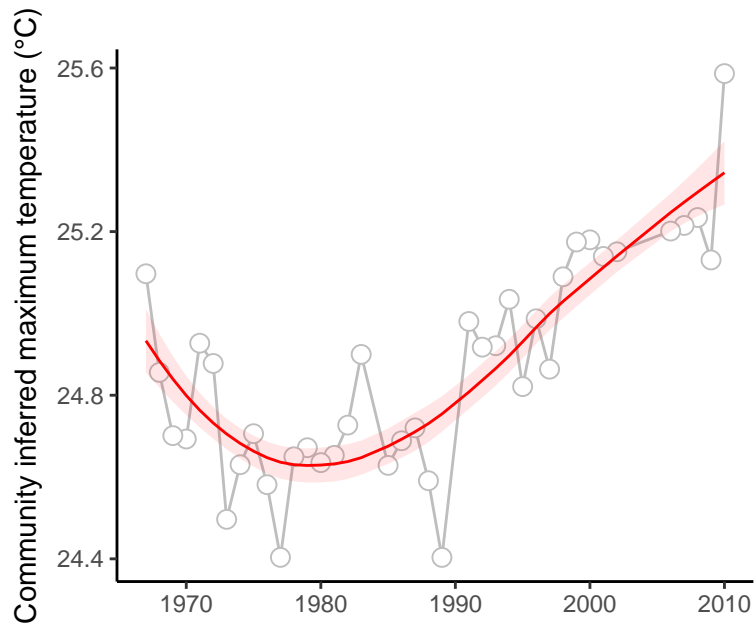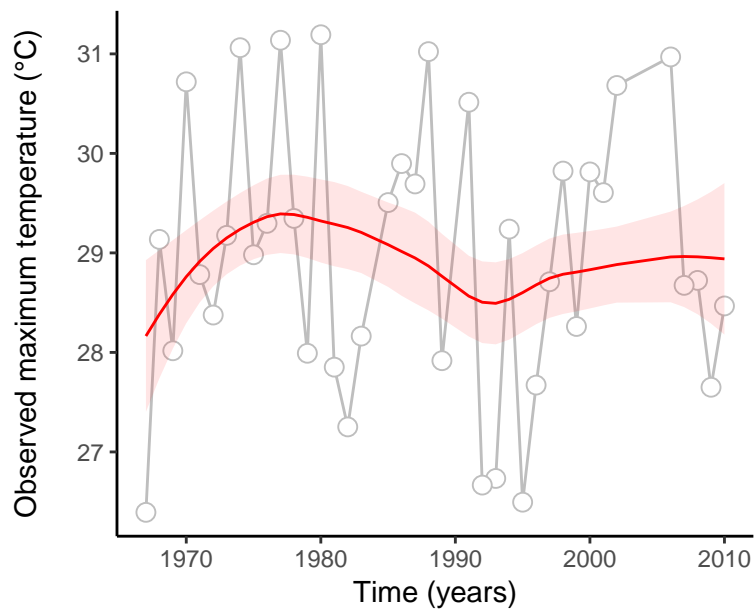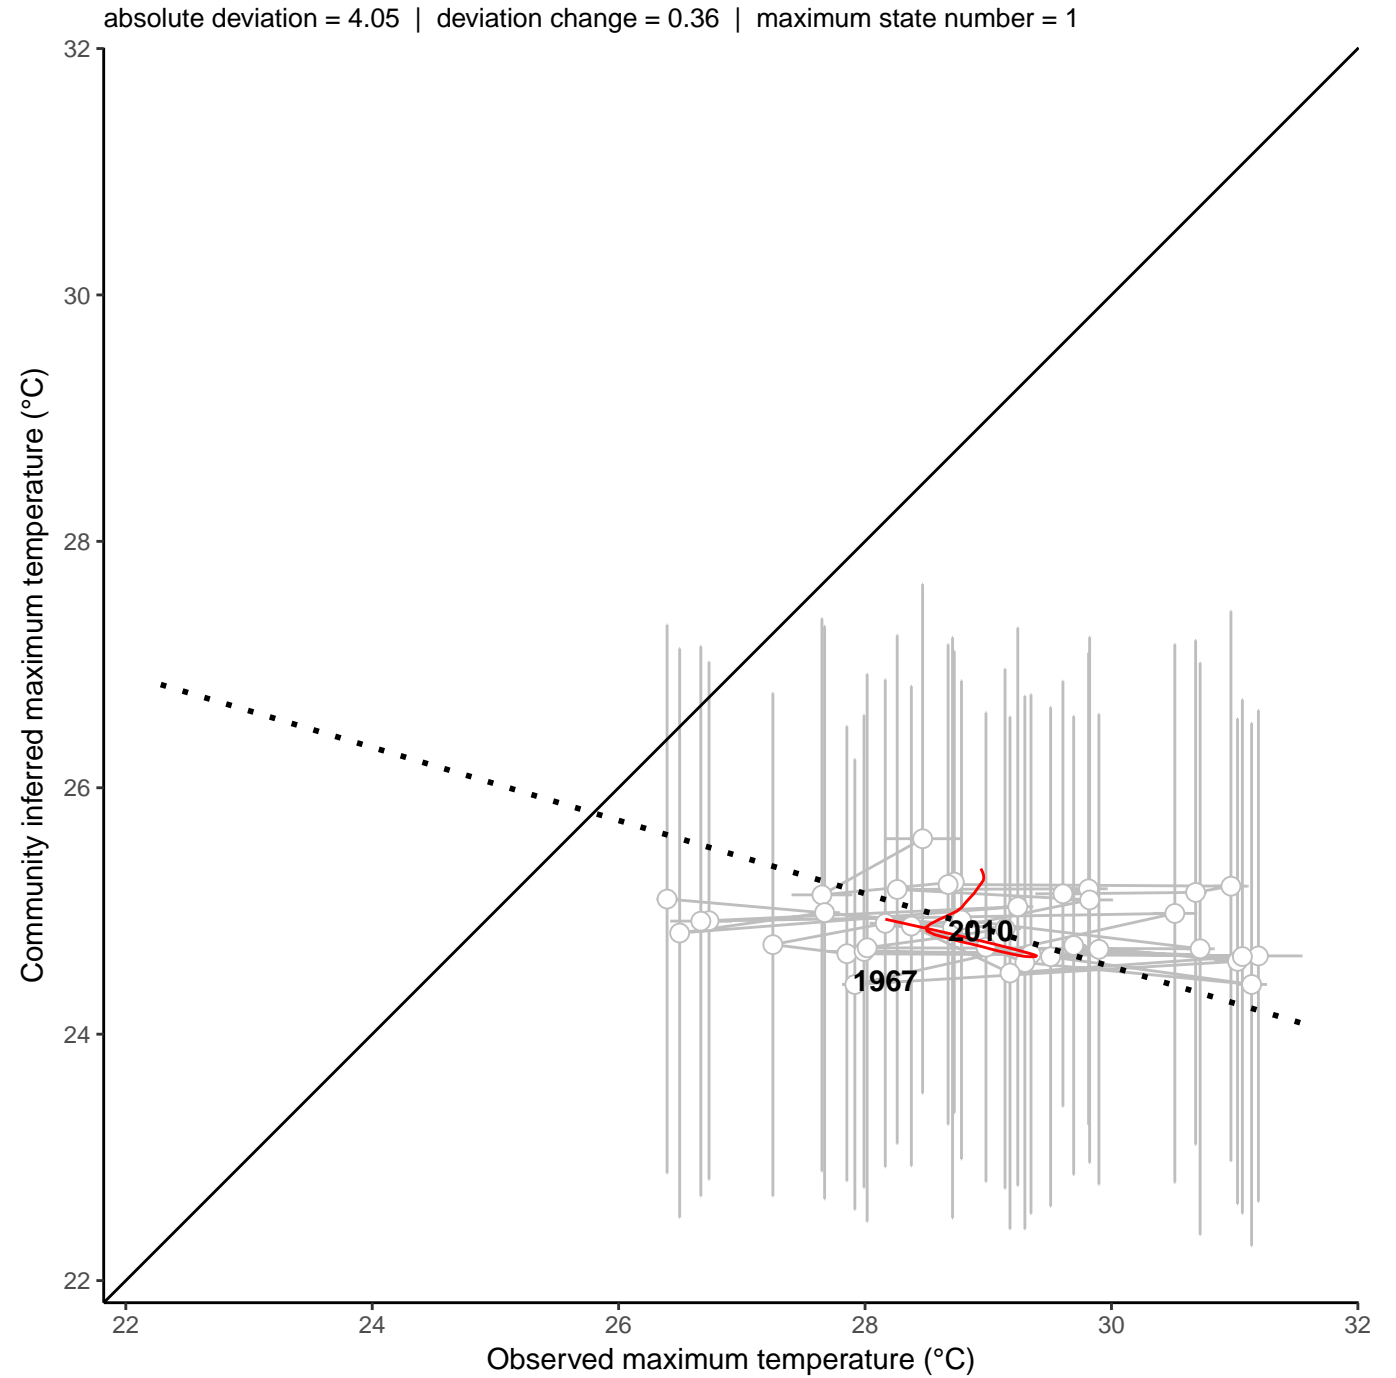

site : 840\_39\_25

absolute deviation = 2.91 | deviation change = 1.03 | maximum state number = 1

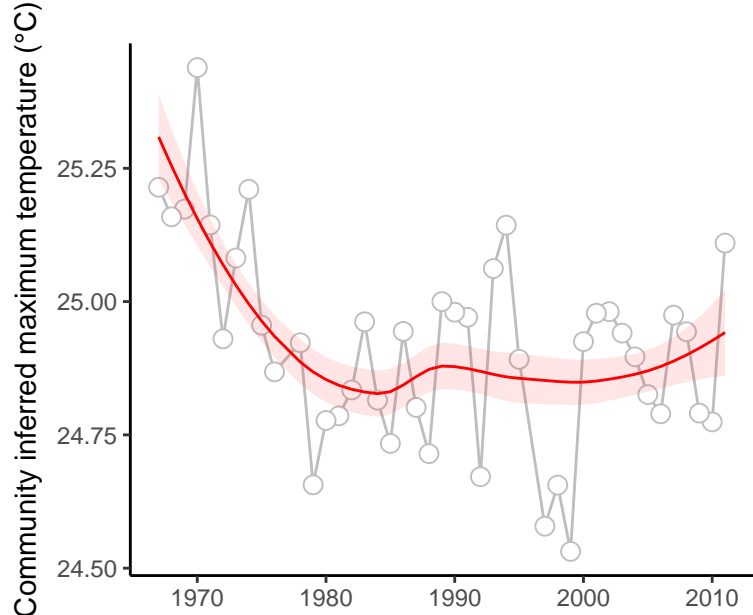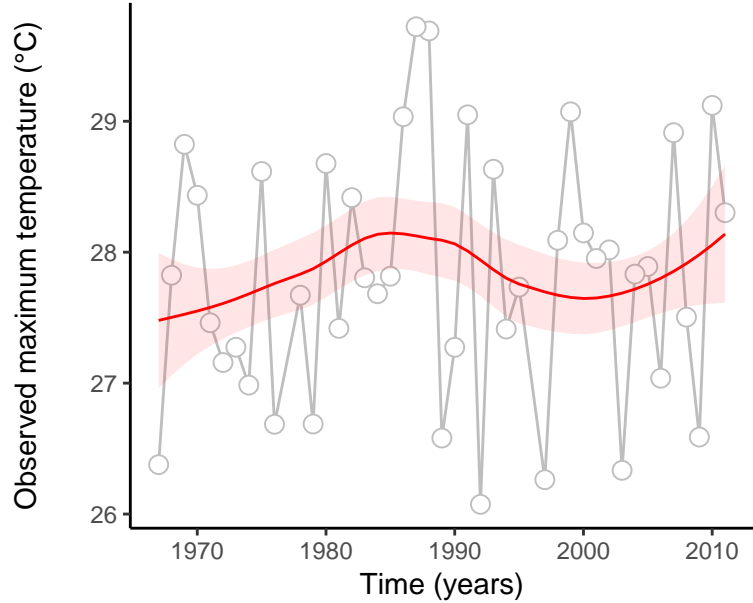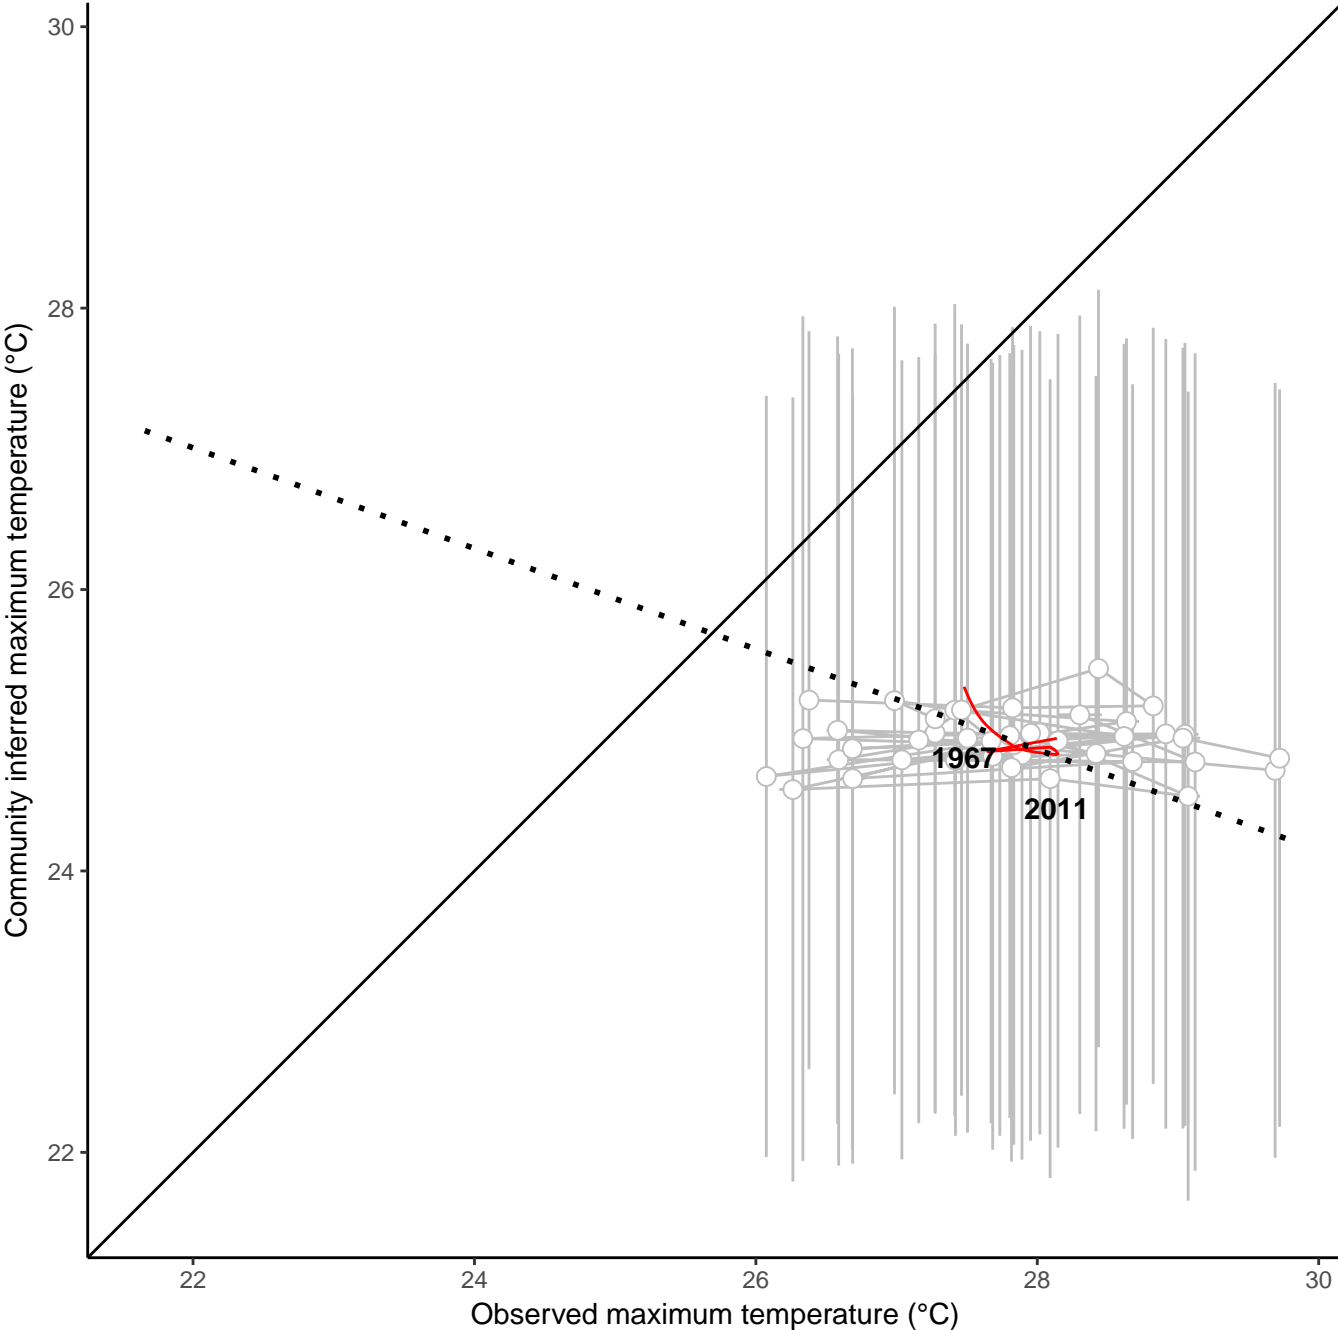

site : 840\_39\_6

absolute deviation = 3.91 | deviation change = 1.97 | maximum state number = 1

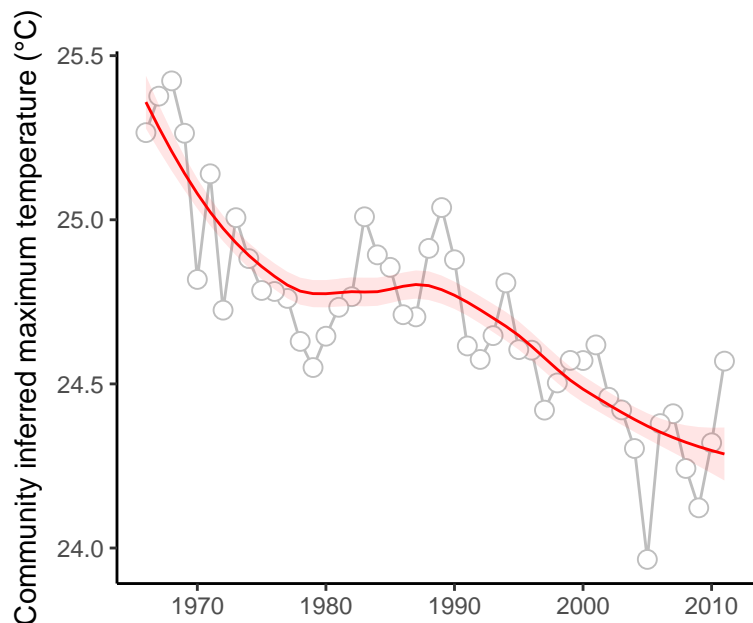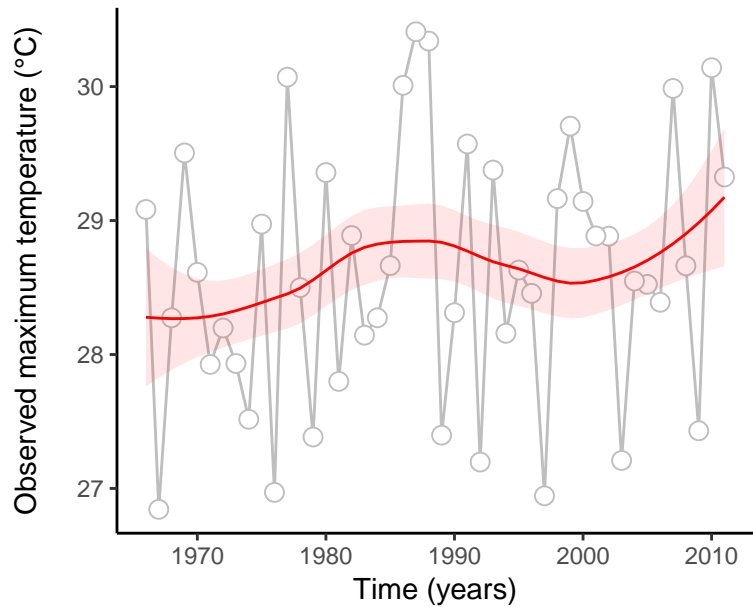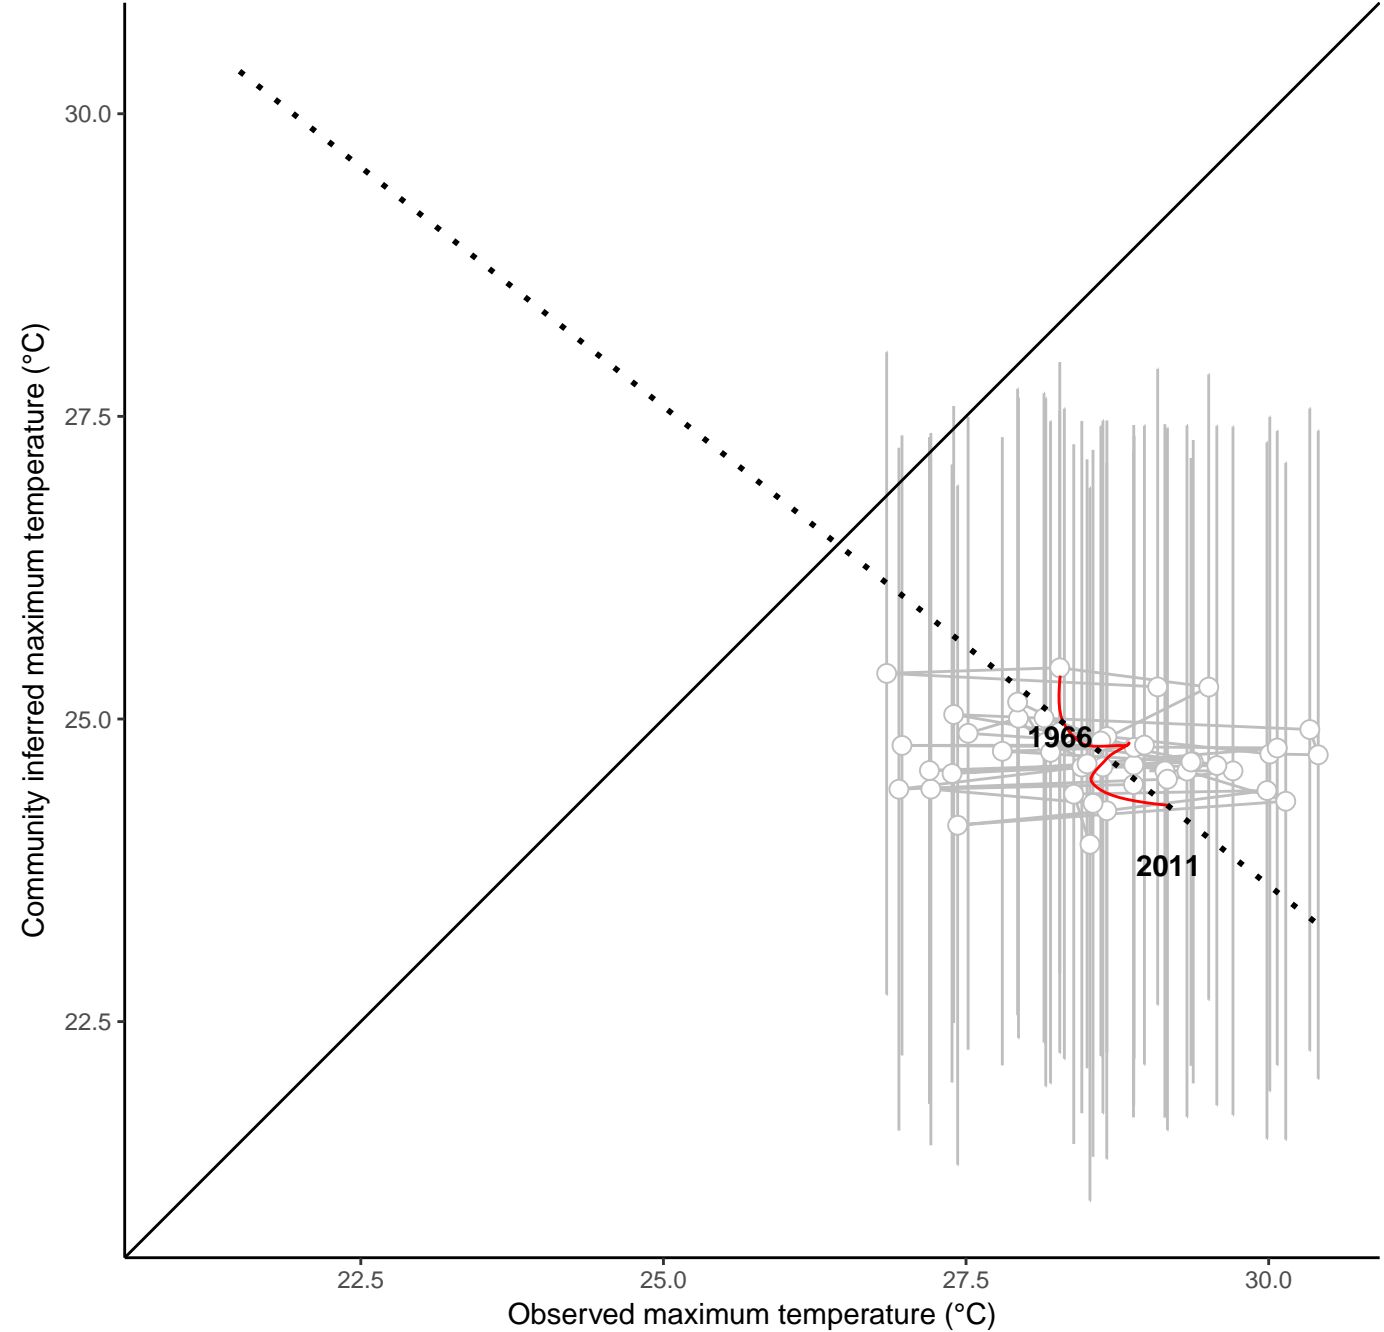

site : 840\_49\_39

absolute deviation = 1.87 | deviation change = 1.38 | maximum state number = 1

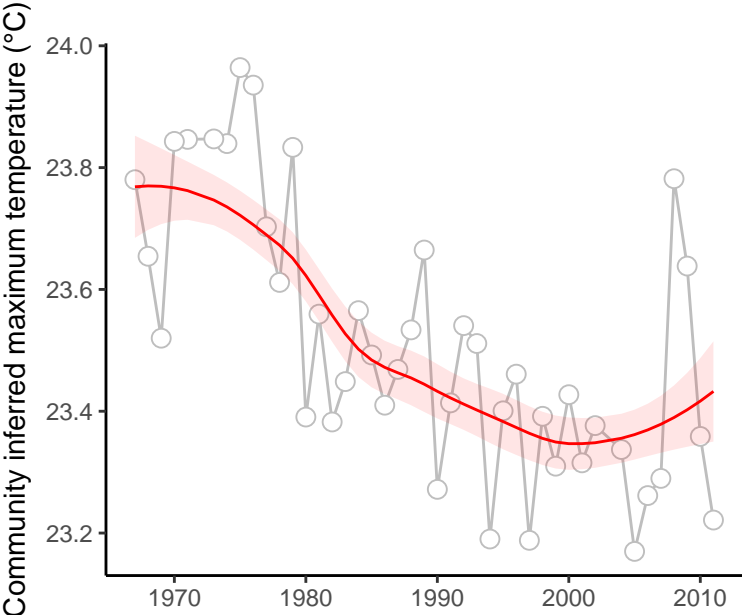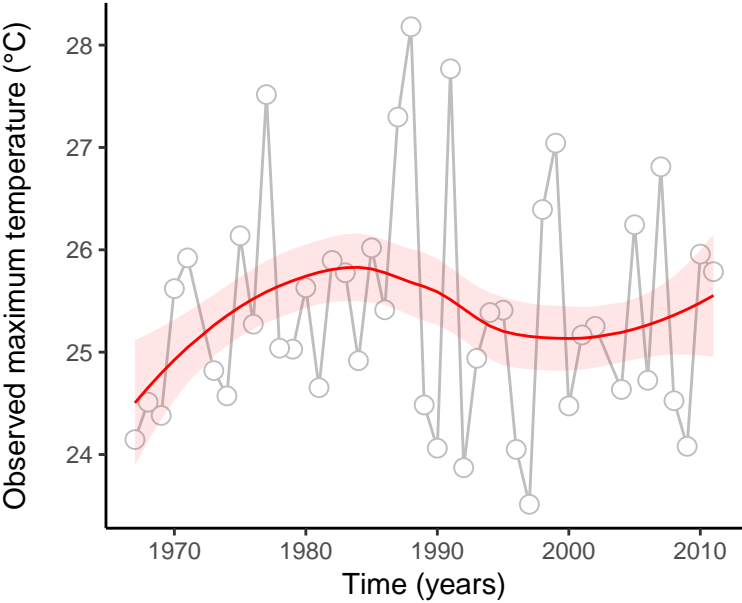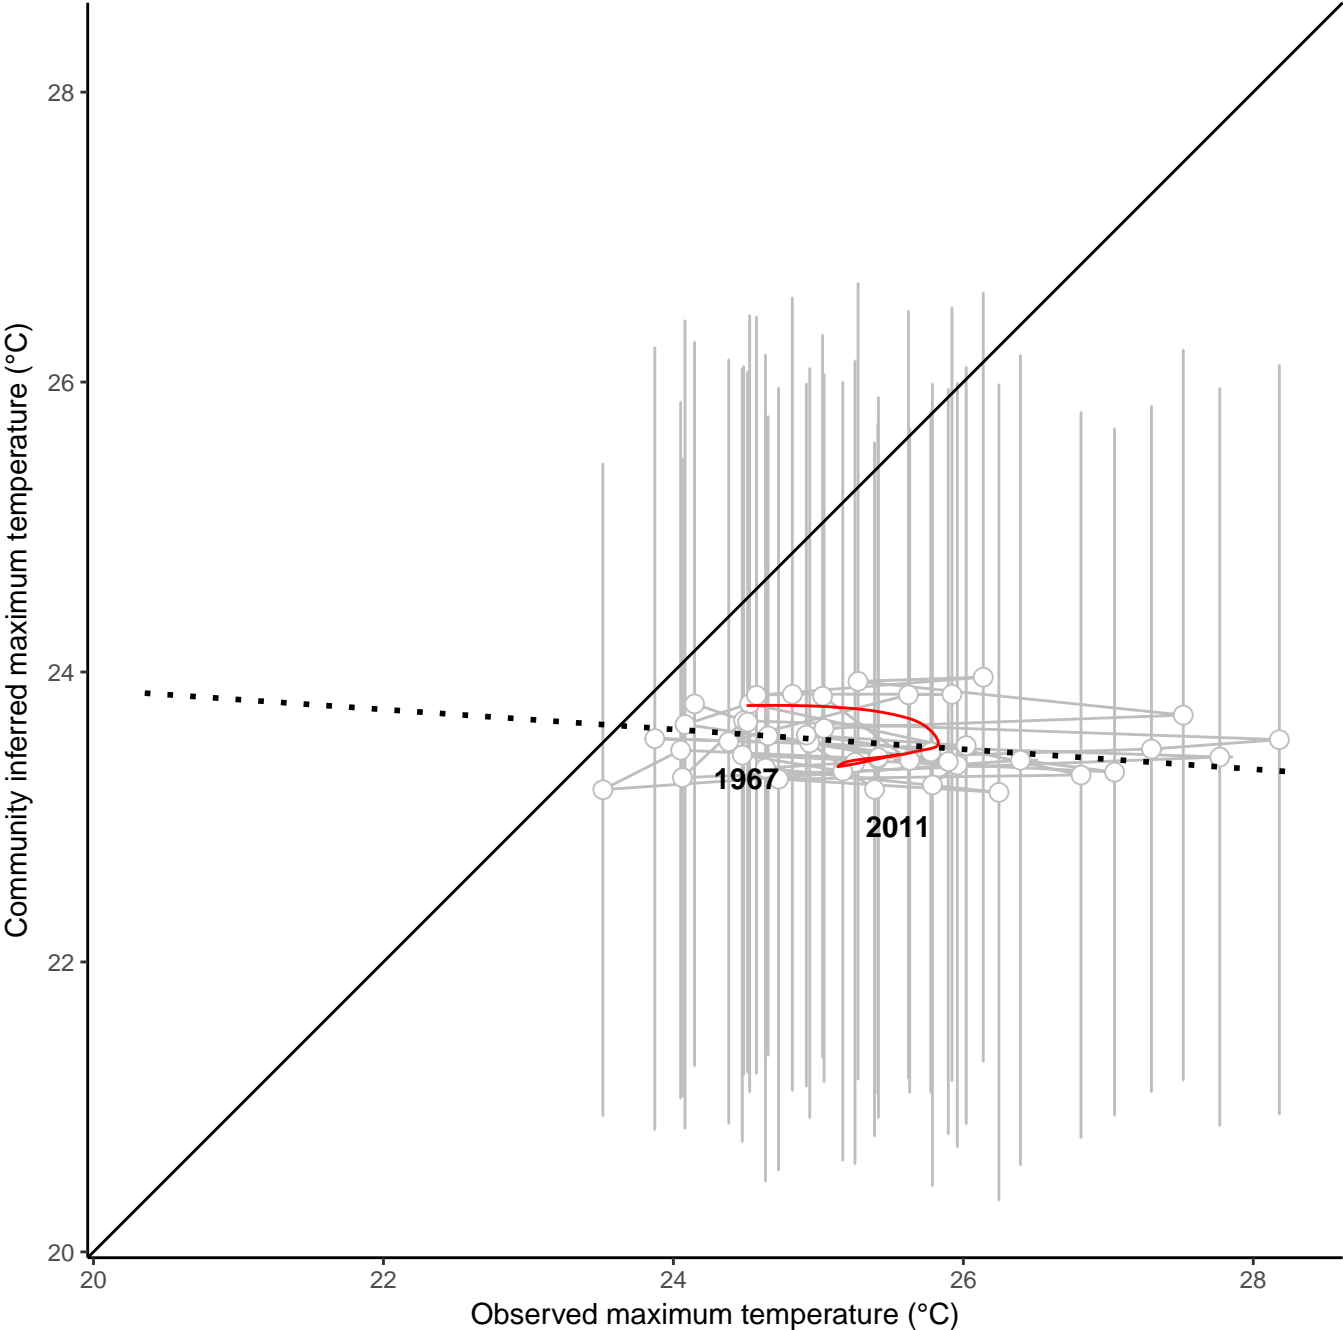

site : 840\_61\_52

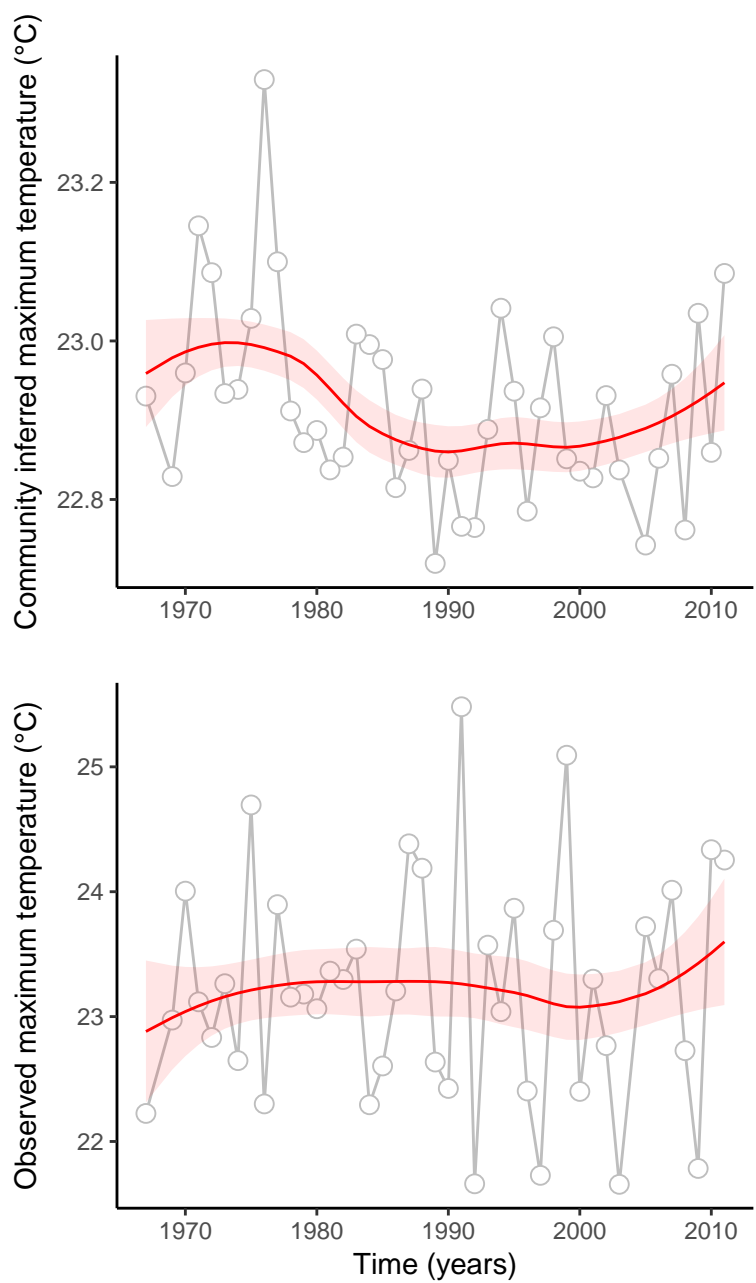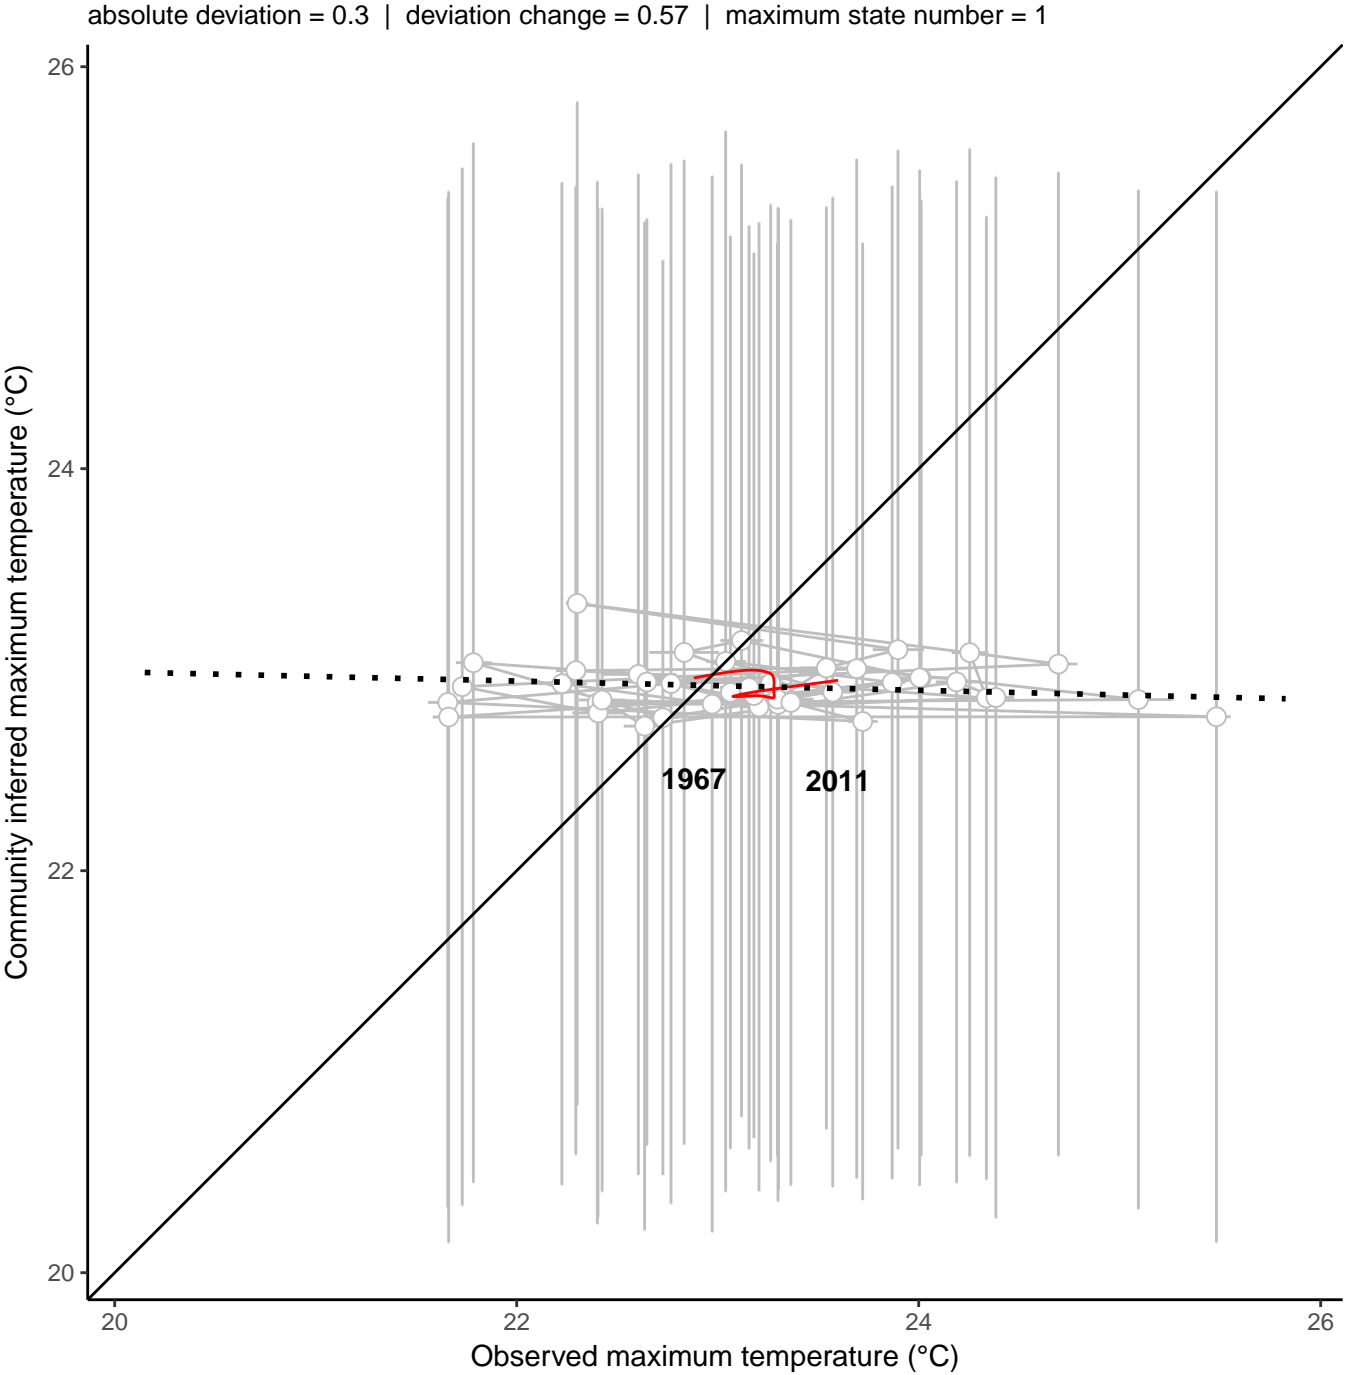

site : 840\_63\_14

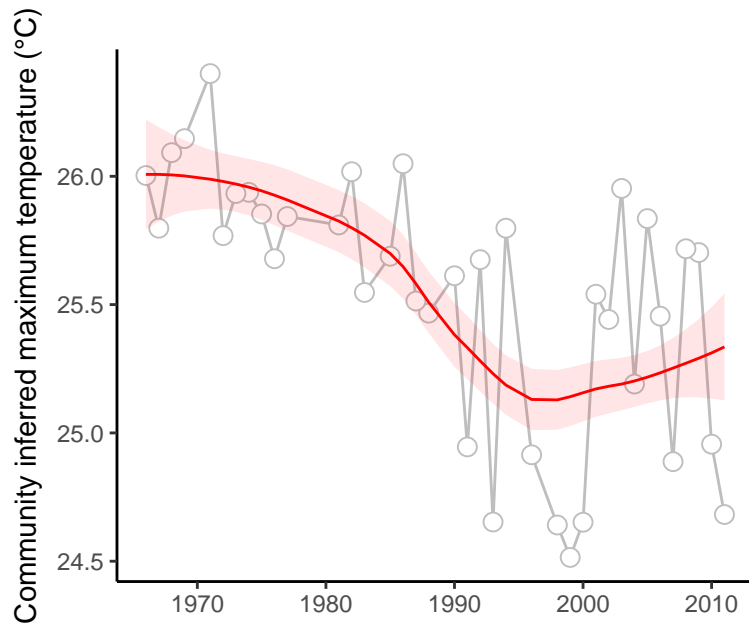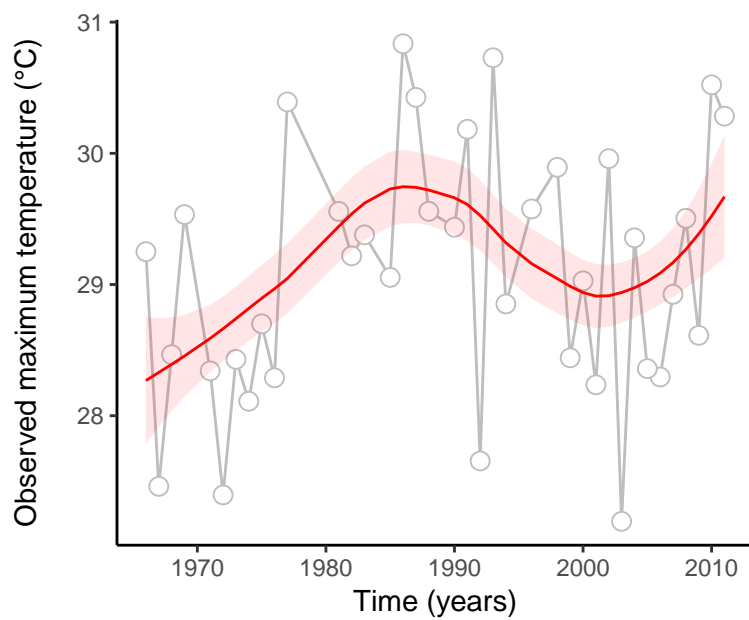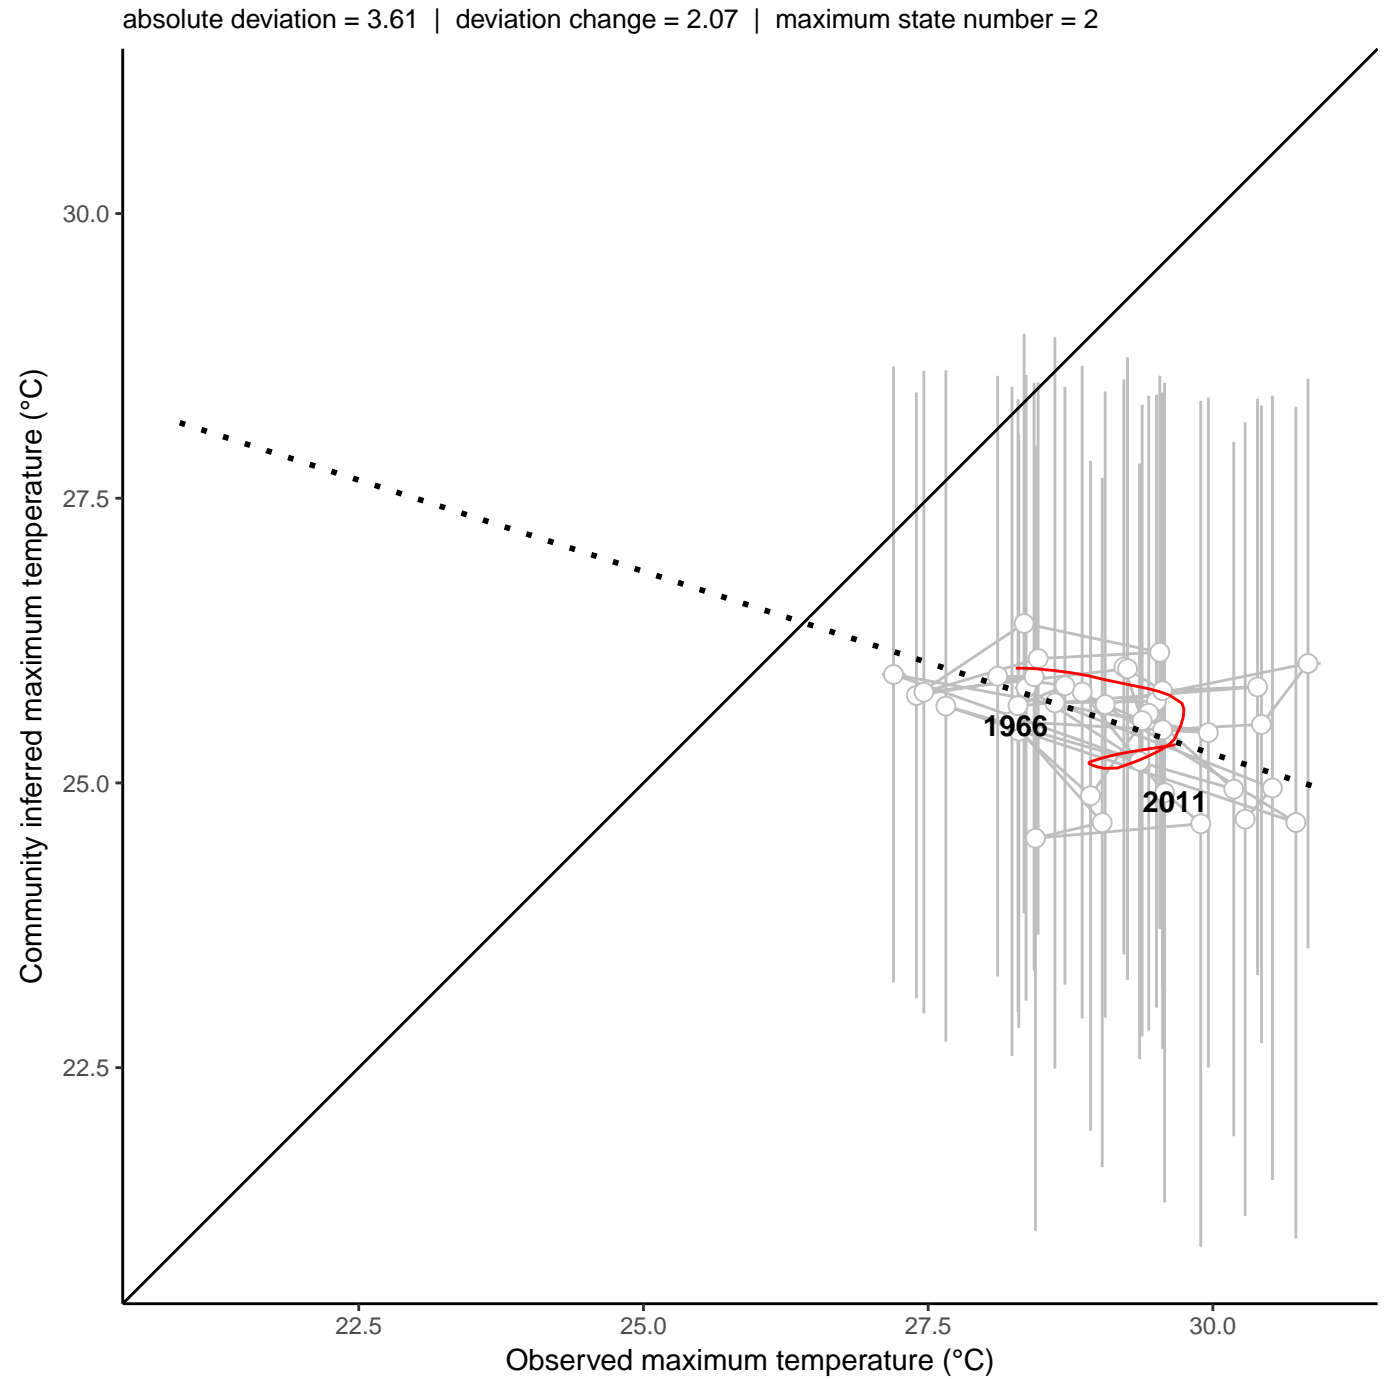

site : 840\_7\_4

absolute deviation = 4.57 | deviation change = 0.38 | maximum state number = 1

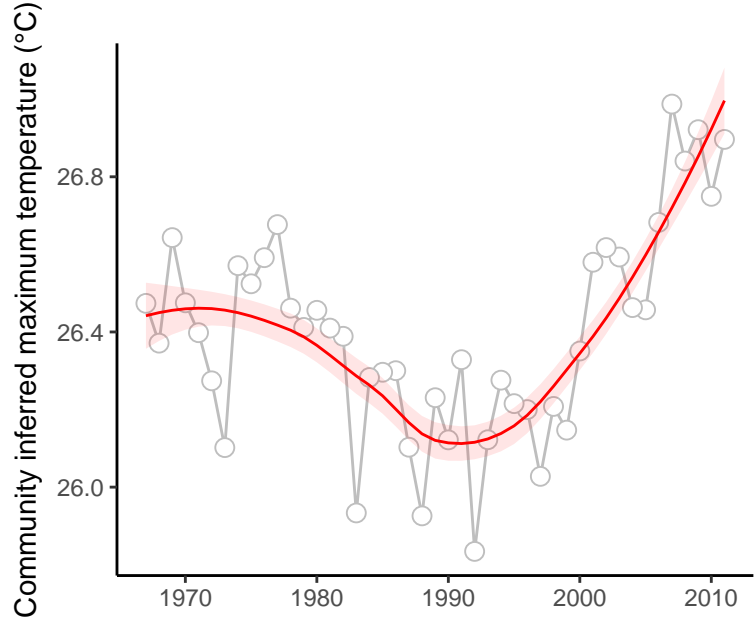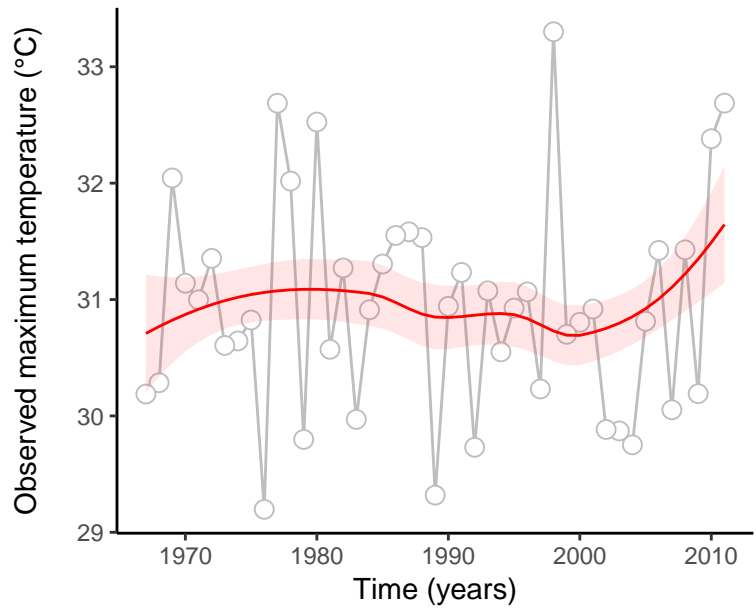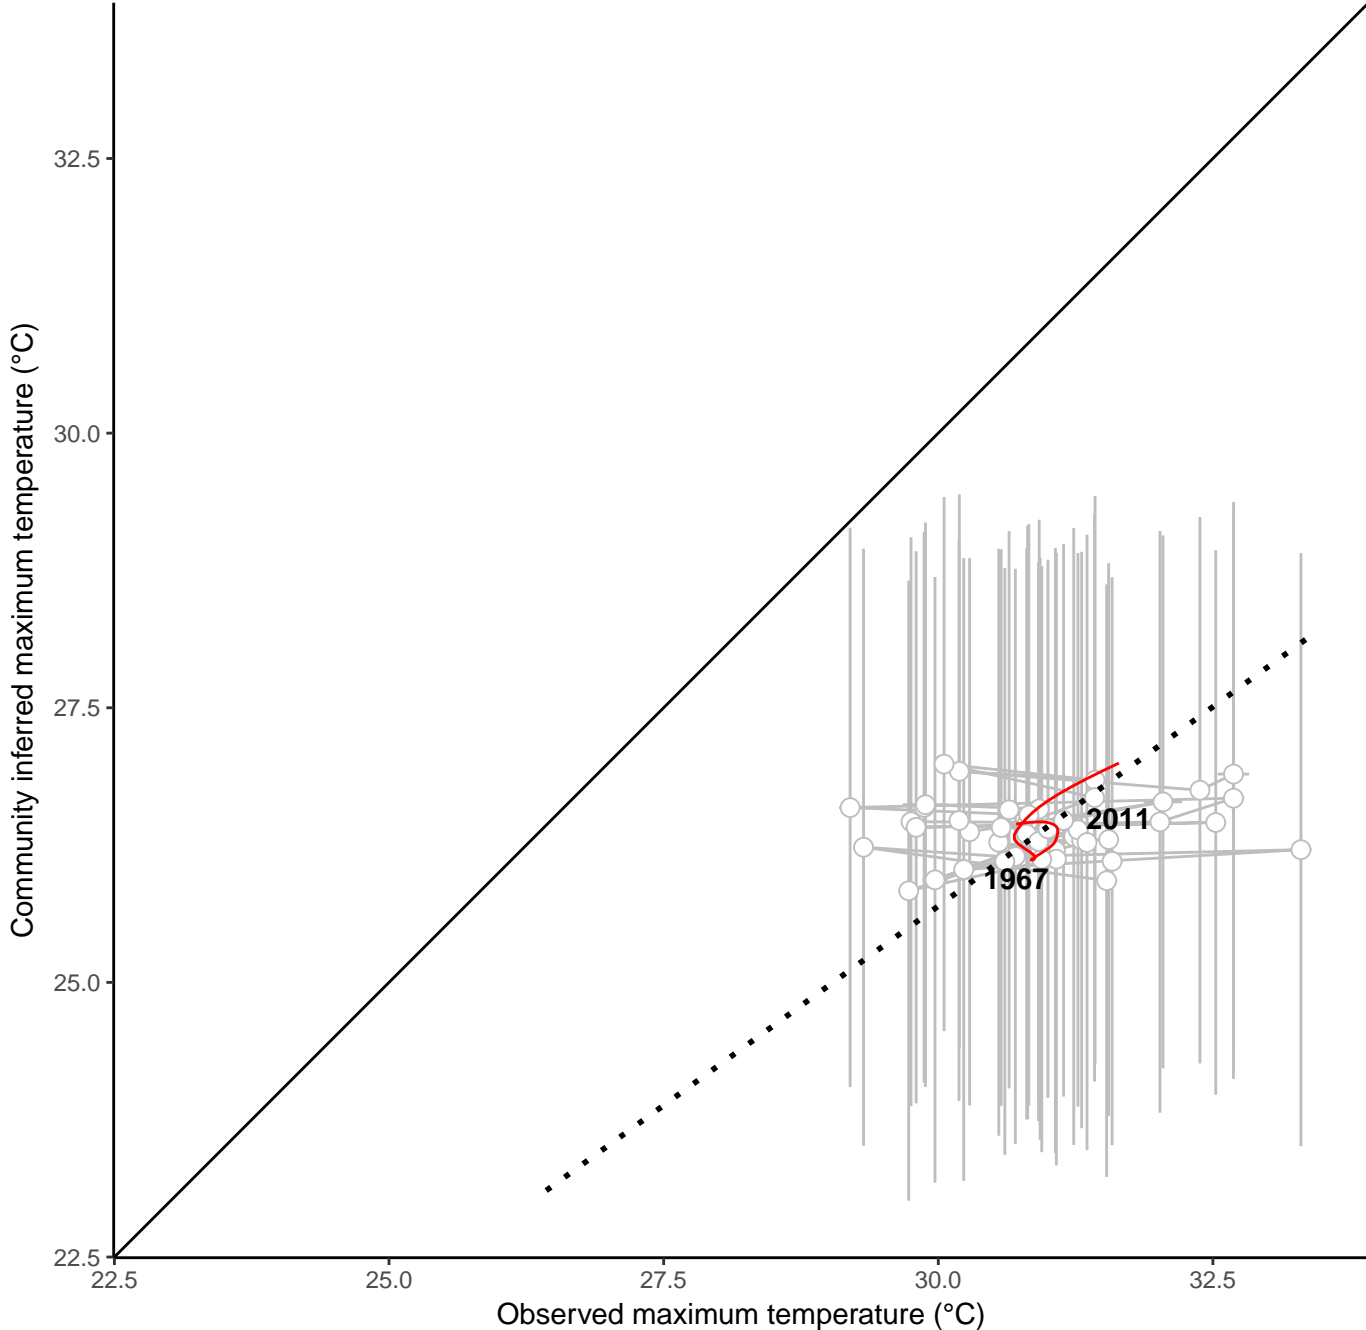



site : 840\_72\_38

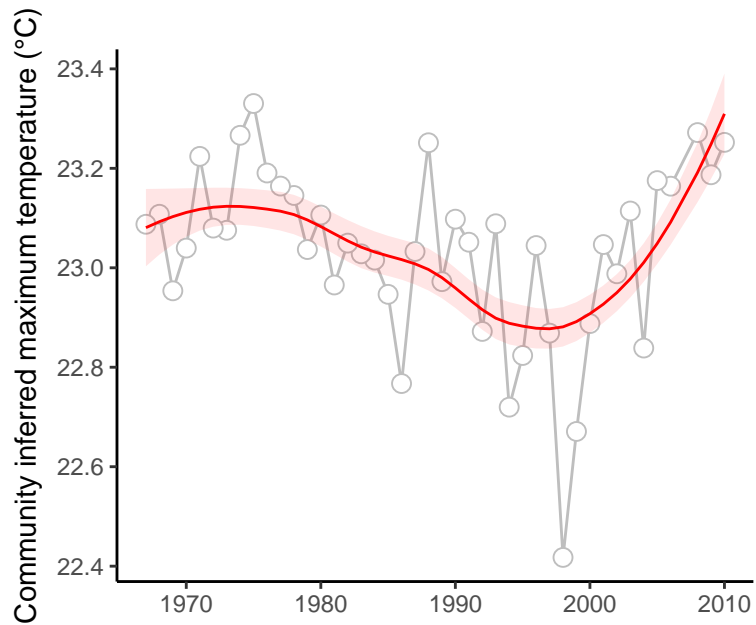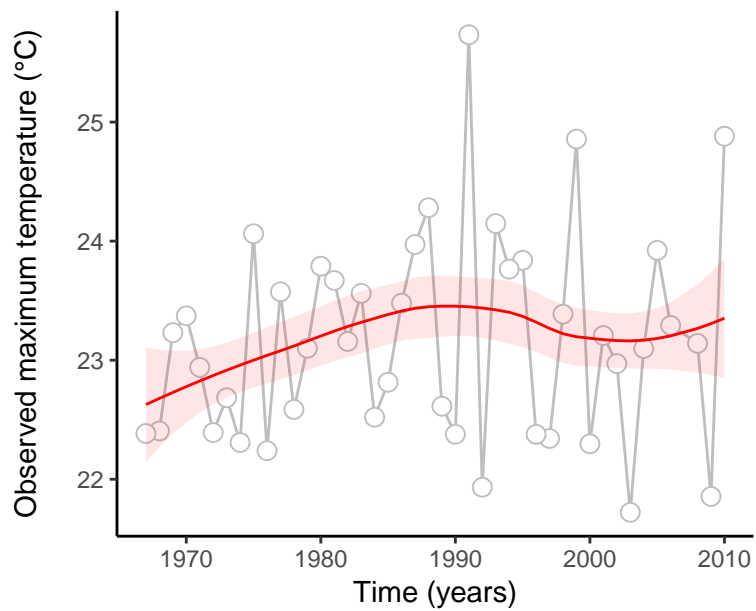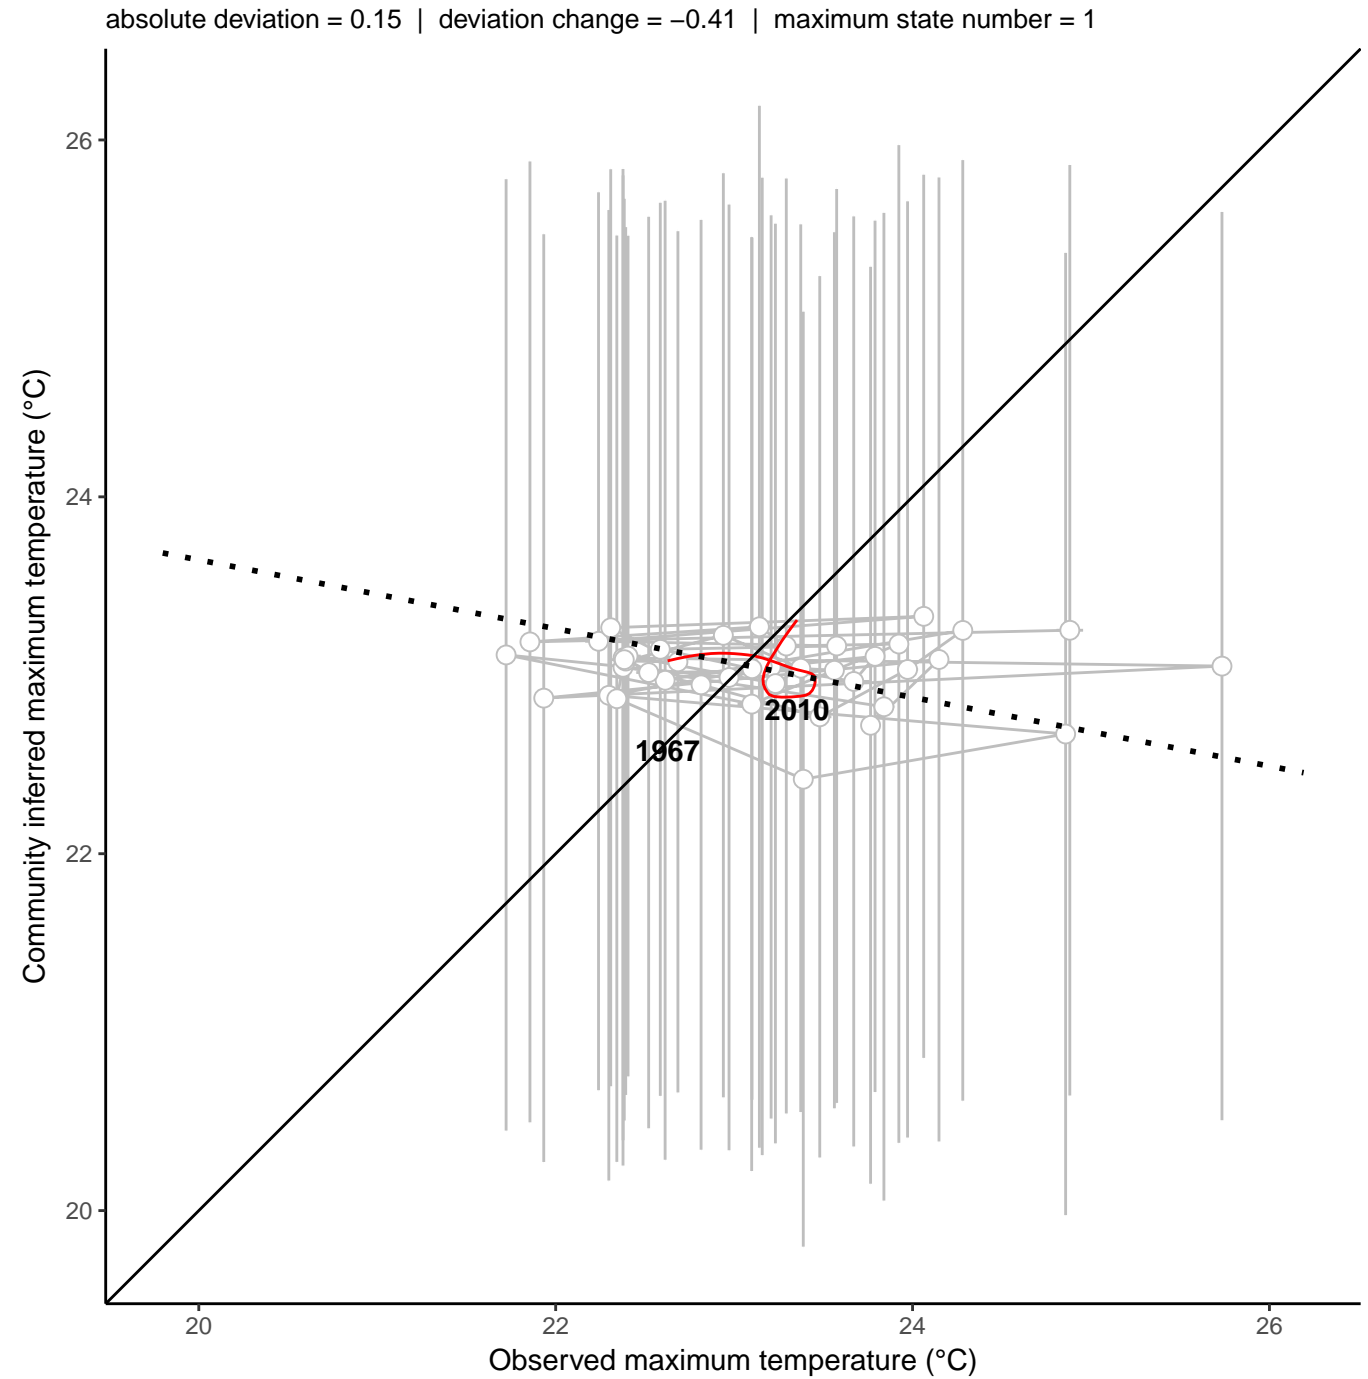

site : 840\_72\_49

absolute deviation = 1.03 | deviation change = -0.06 | maximum state number = 1

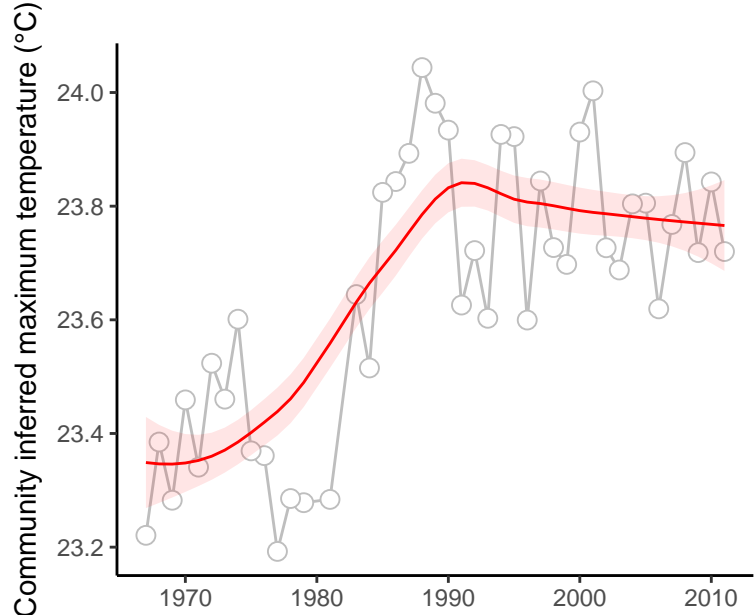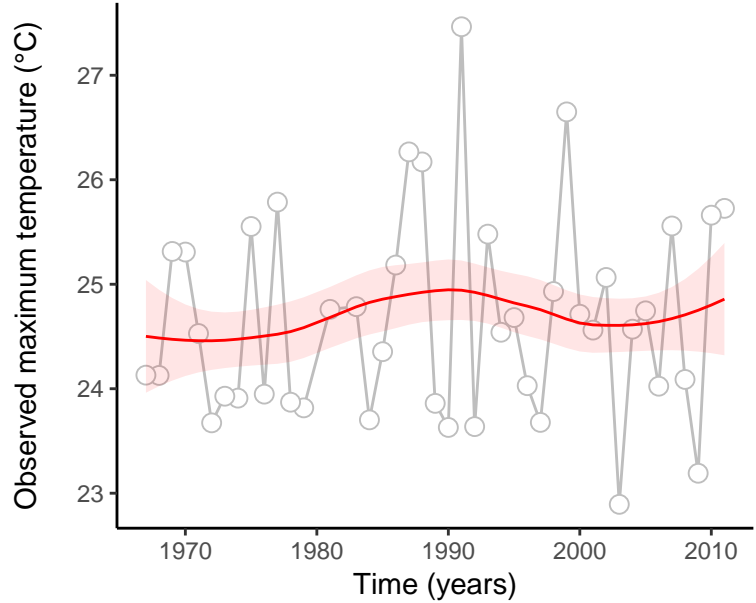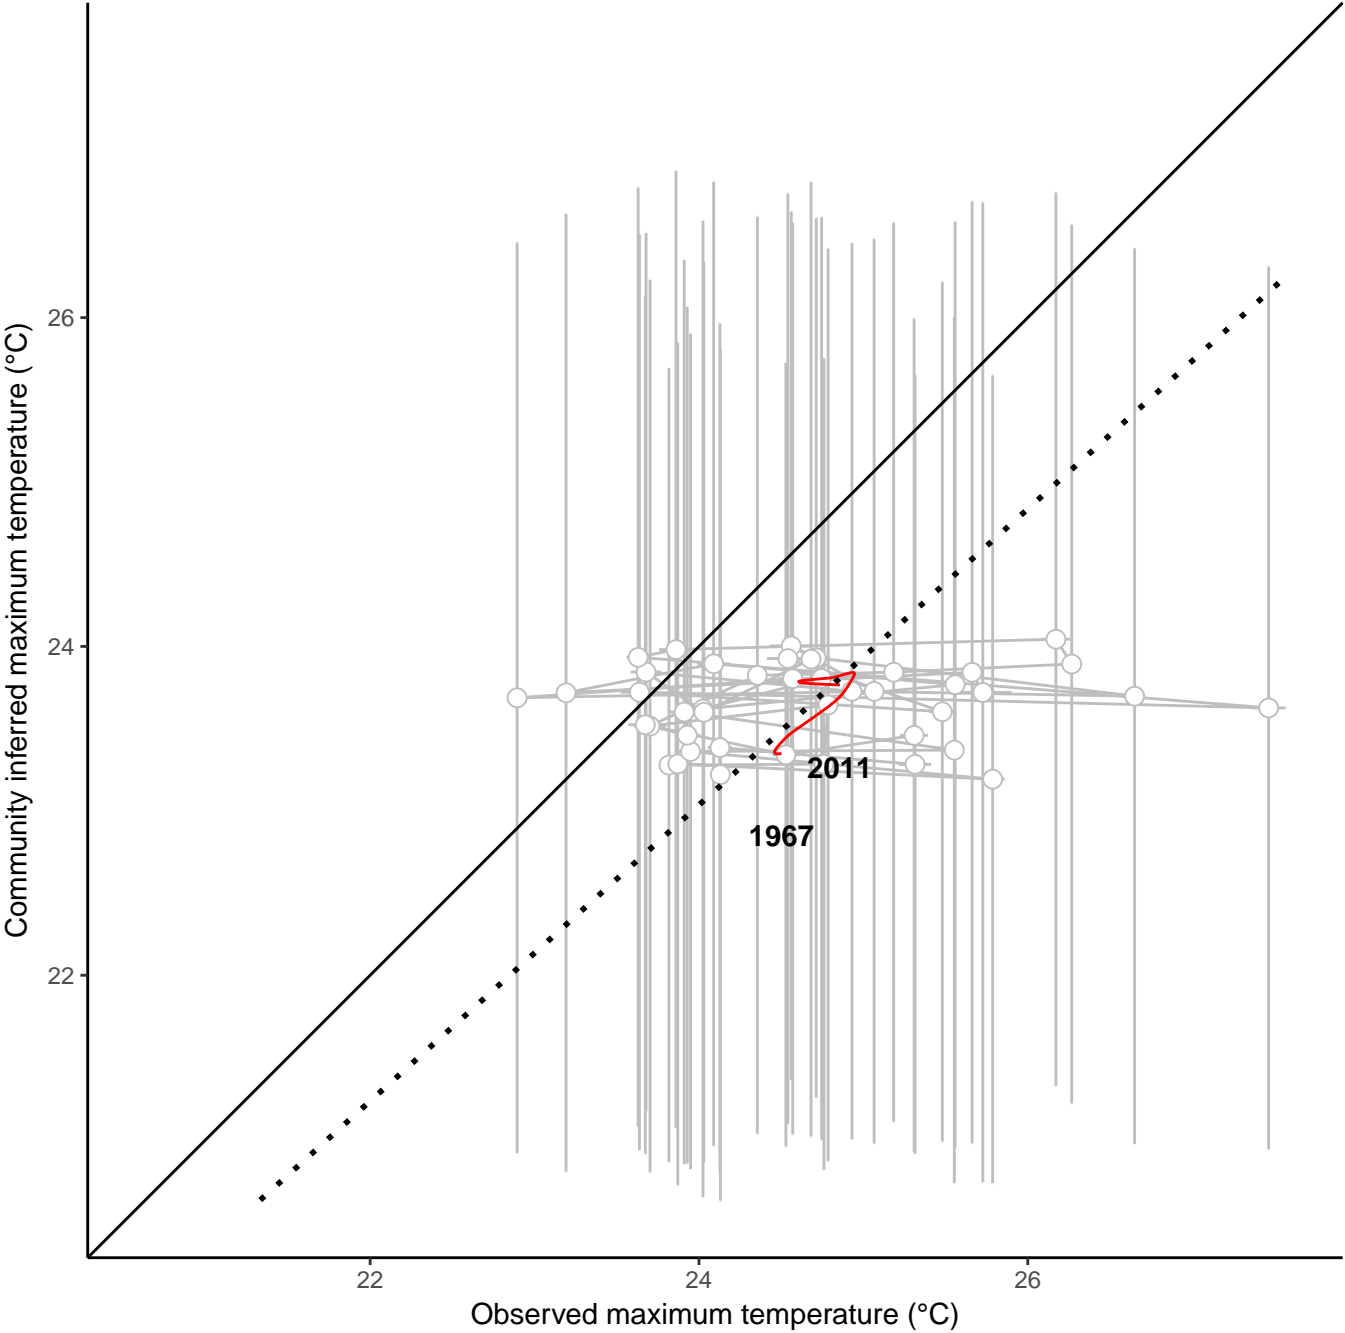

site : 840\_83\_31

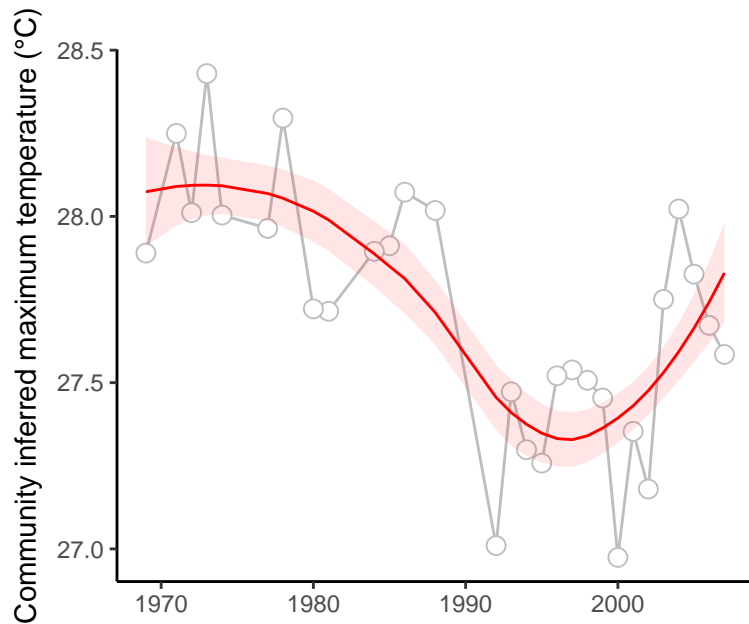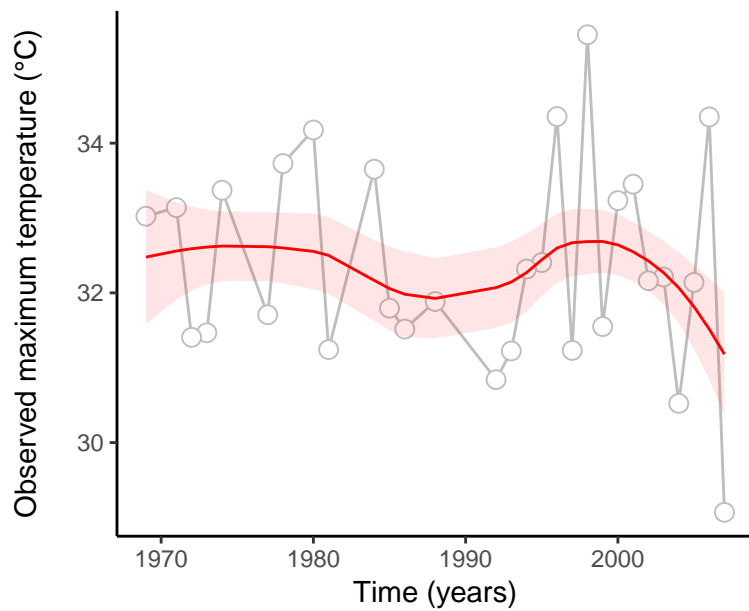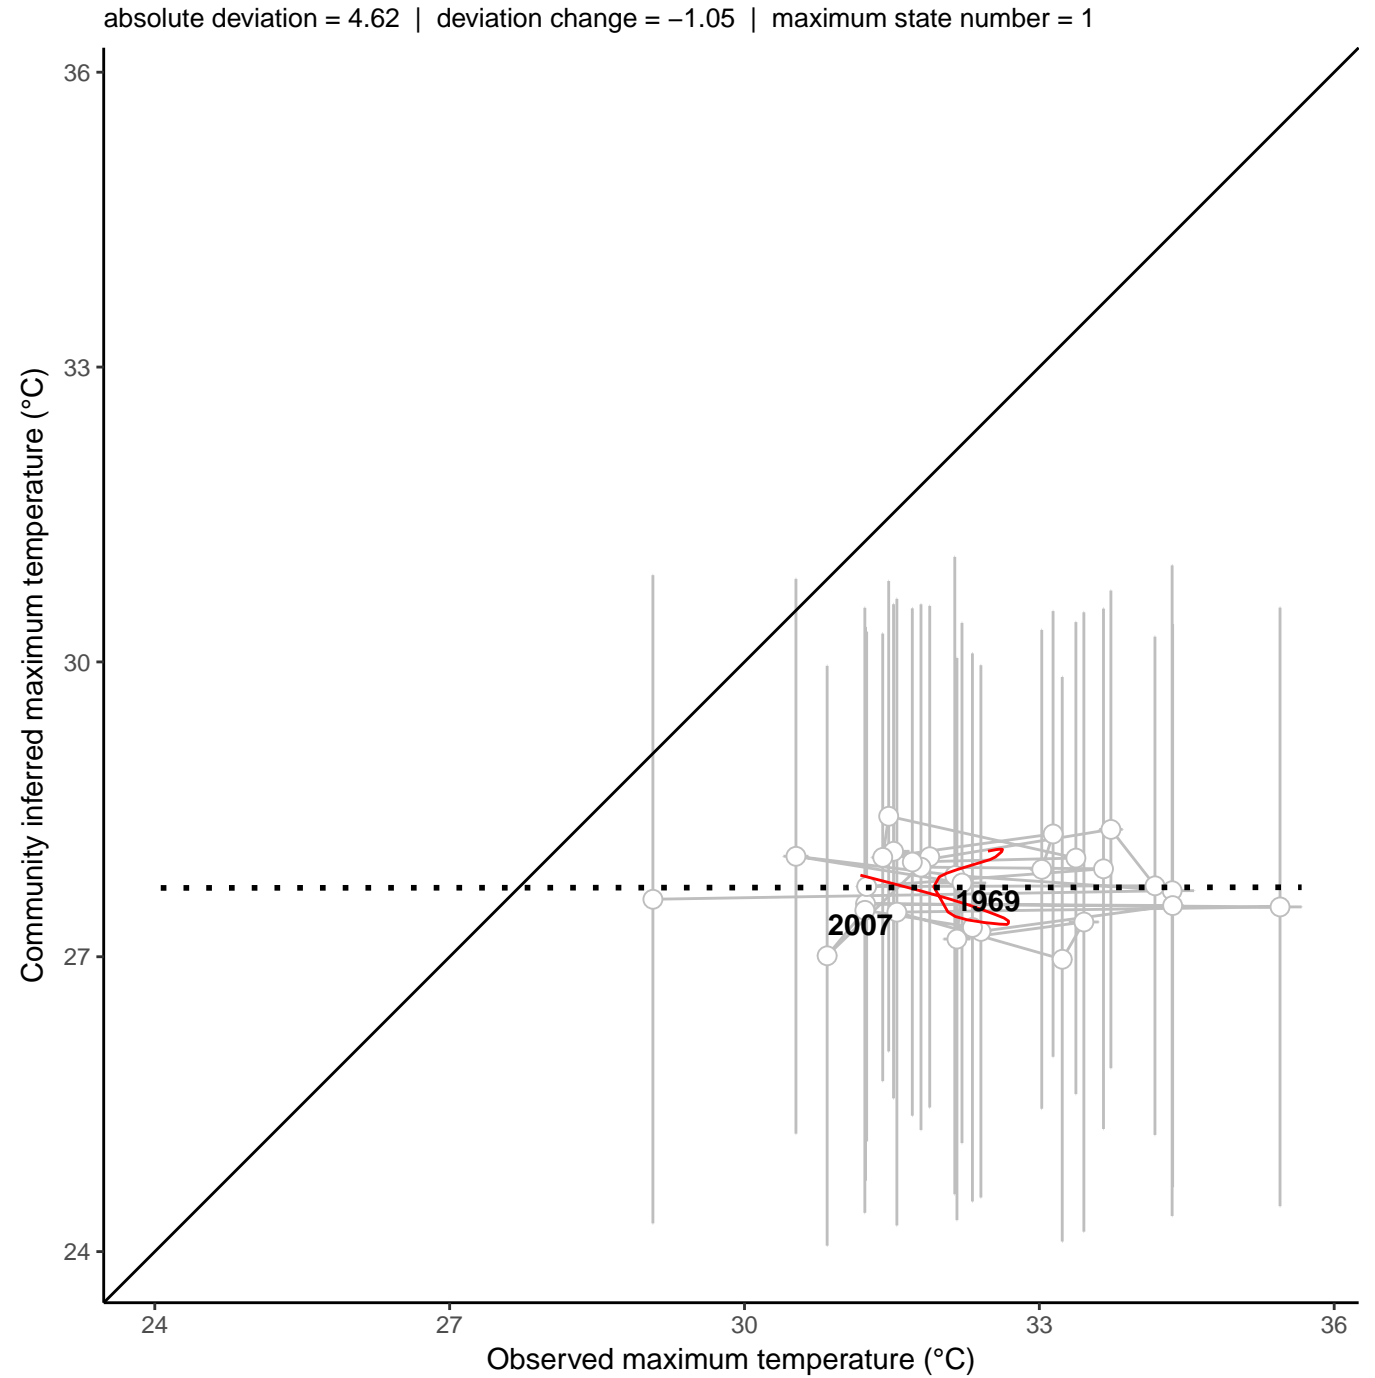

site : 840\_91\_56

absolute deviation = 1.47 | deviation change = 0.98 | maximum state number = 1

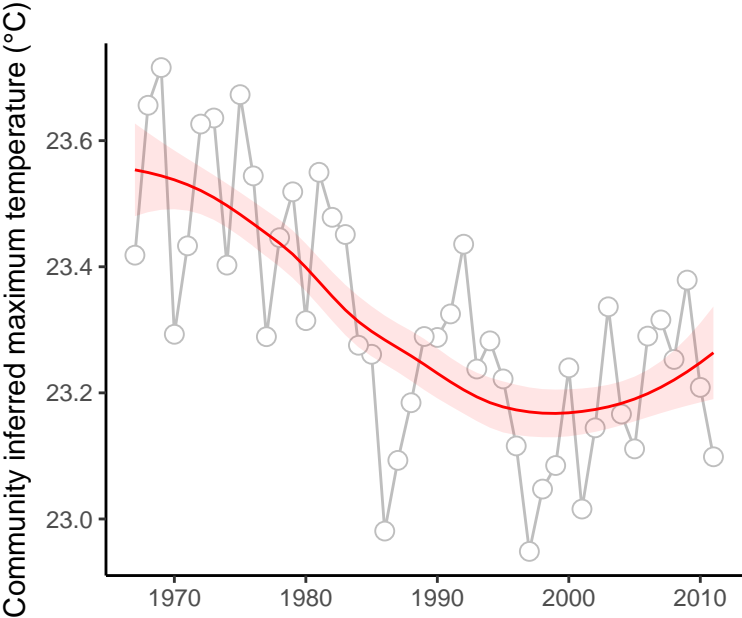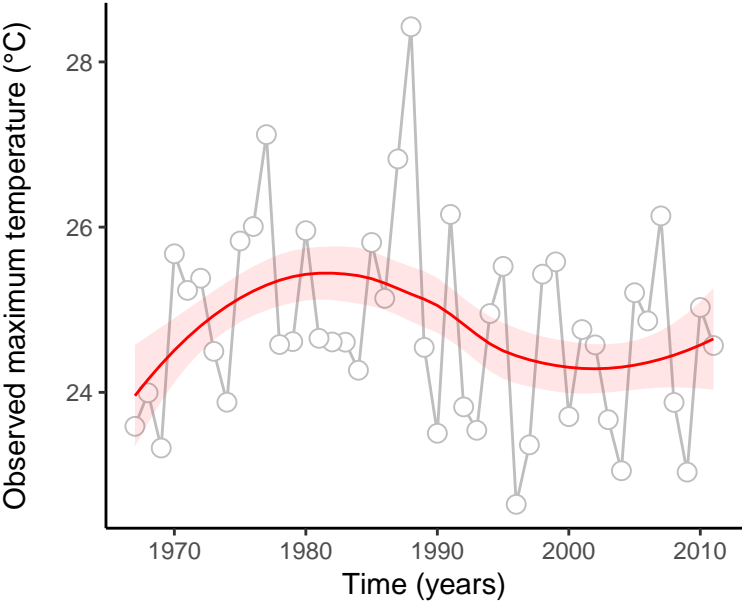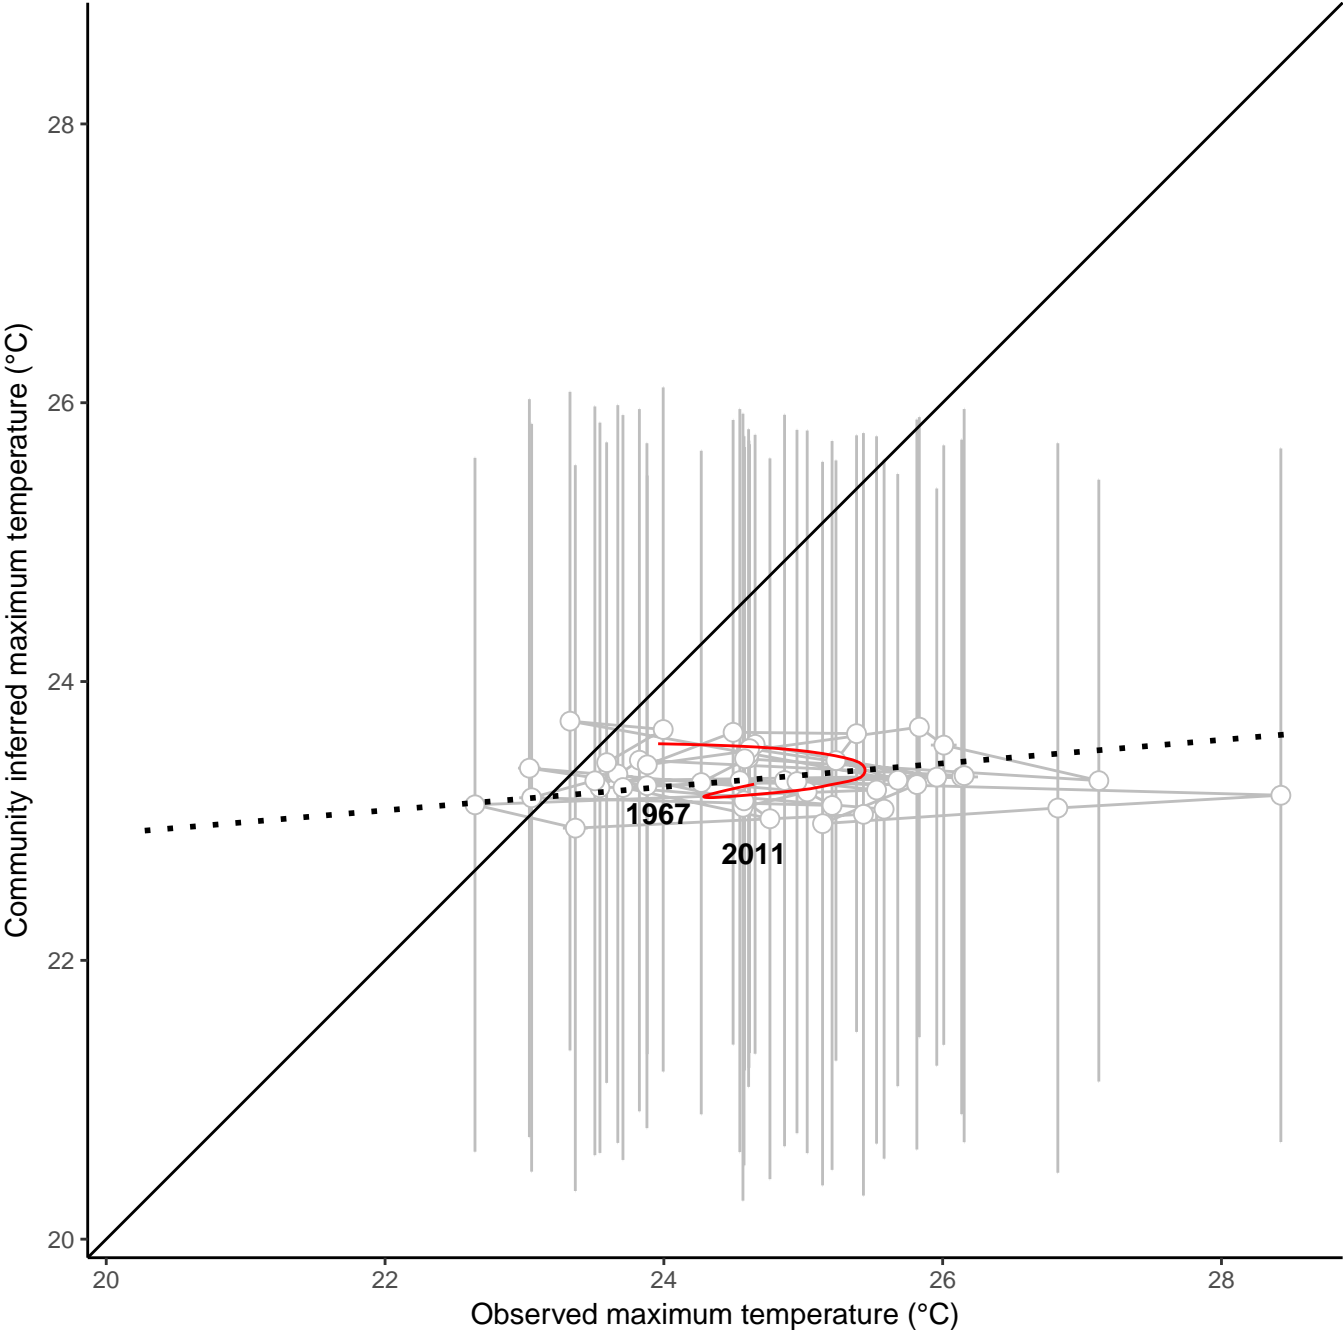

site : 840\_14\_176

absolute deviation = 1.36 | deviation change = 0.31 | maximum state number = 1

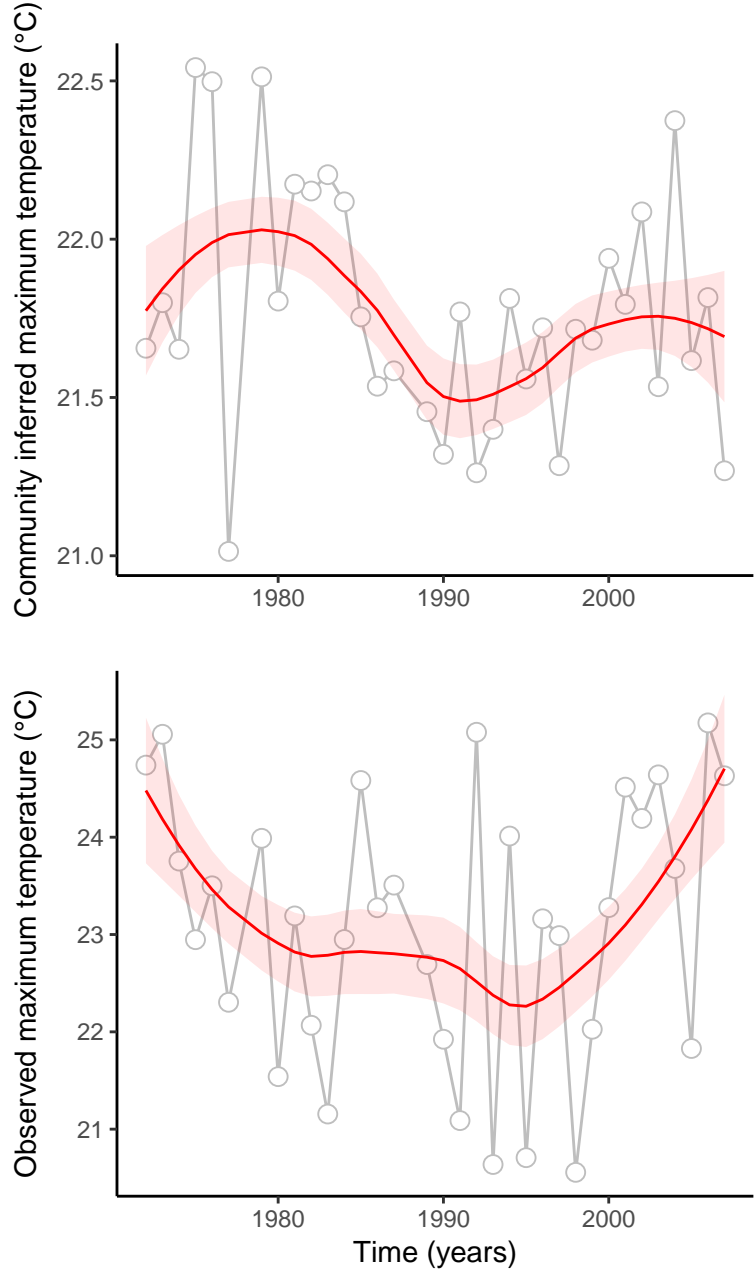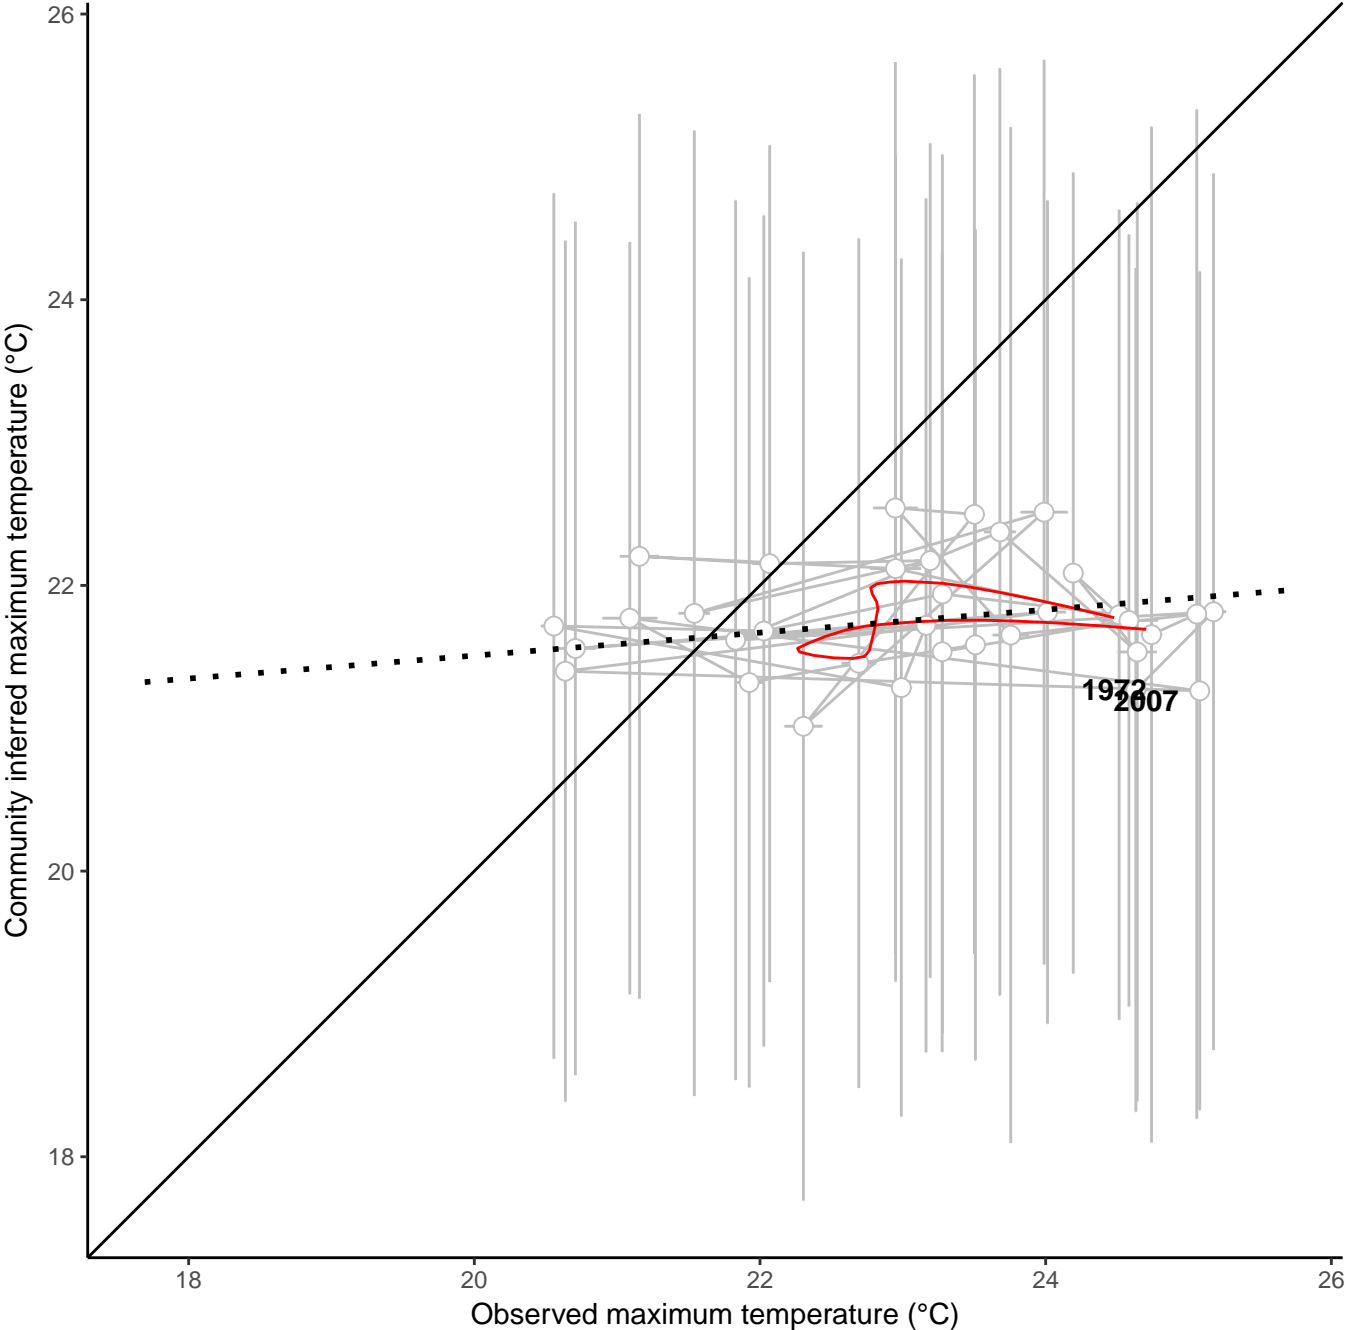

site : 840\_18\_9

absolute deviation = 1.66 | deviation change = 0.51 | maximum state number = 1

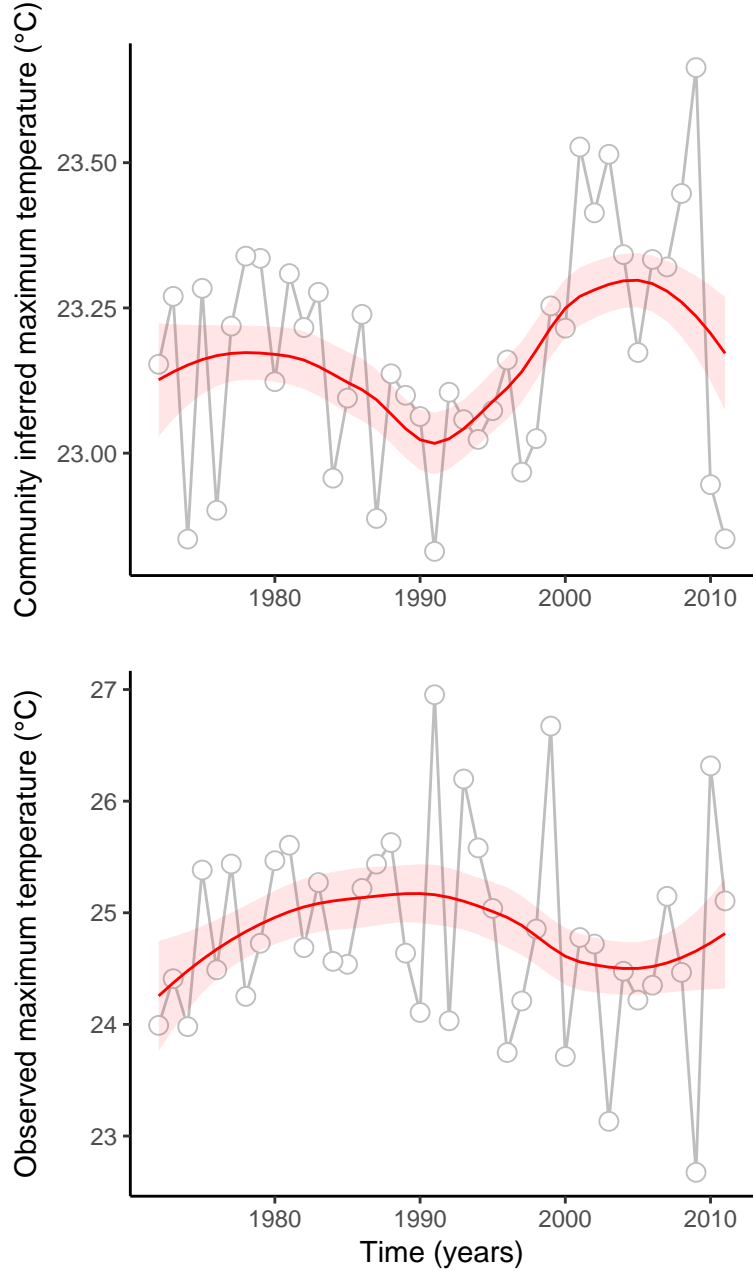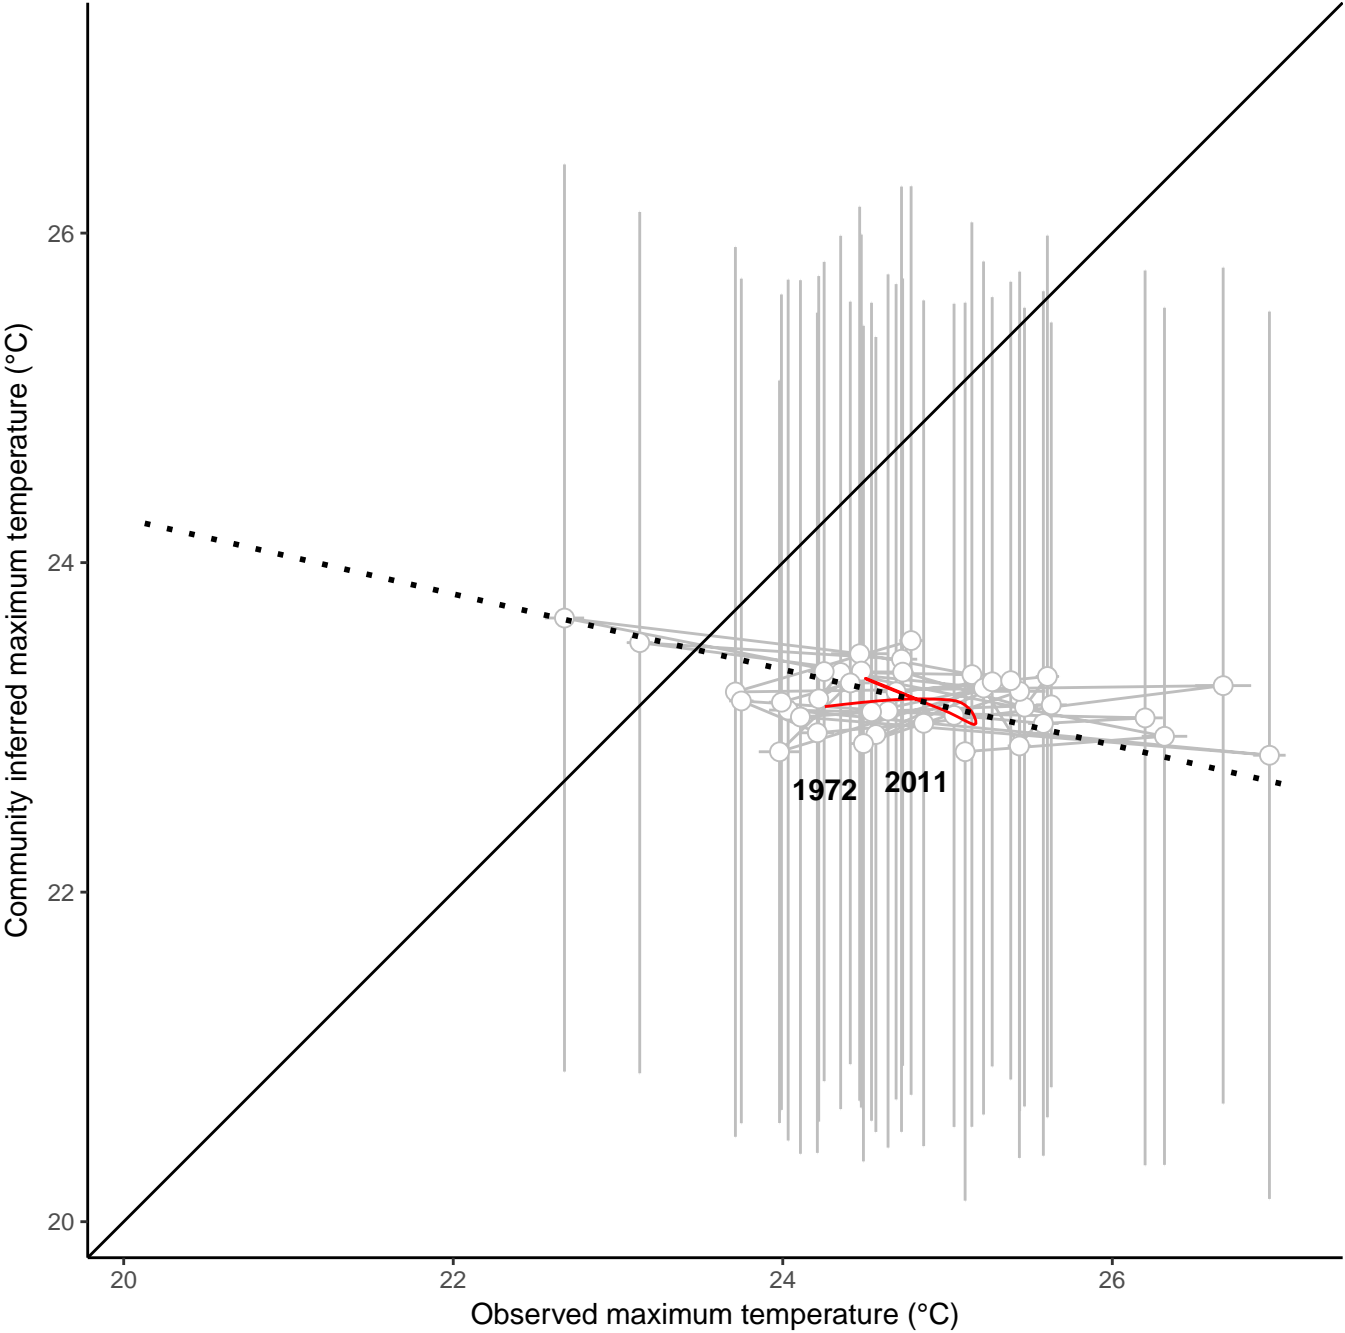

site : 840\_35\_20

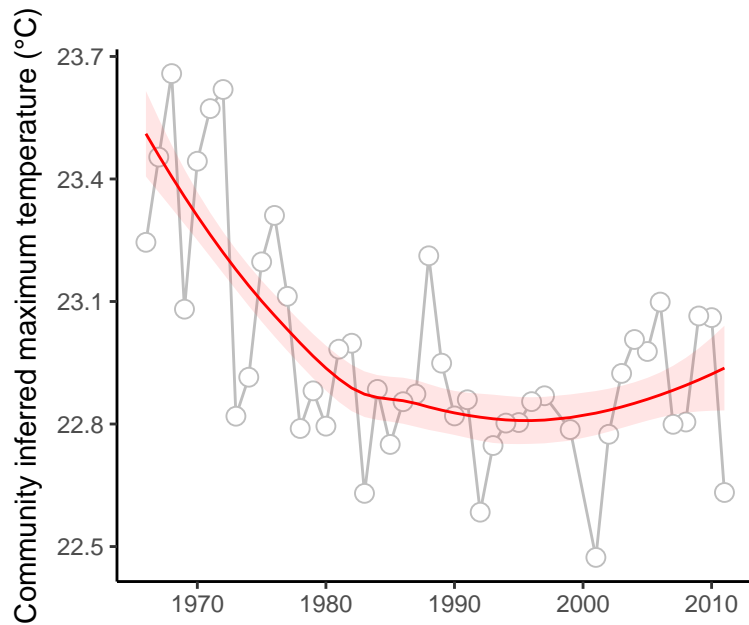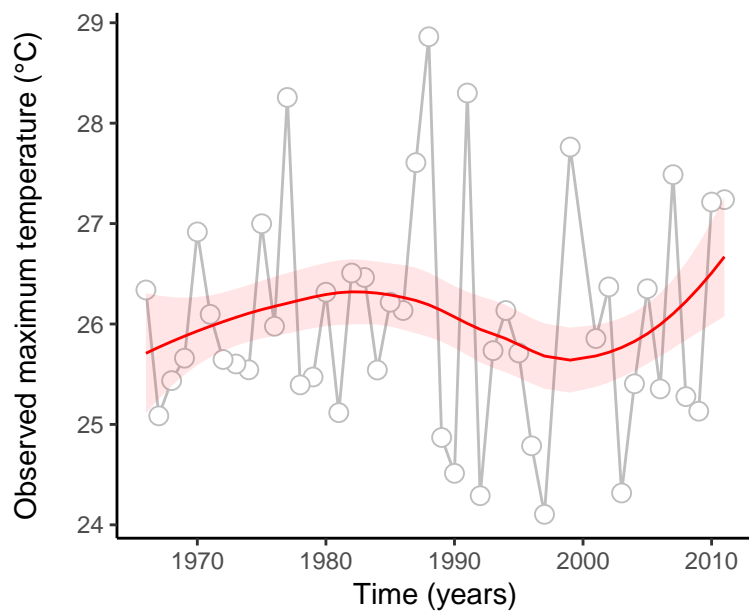

absolute deviation = 3.08 | deviation change = 1.54 | maximum state number = 1

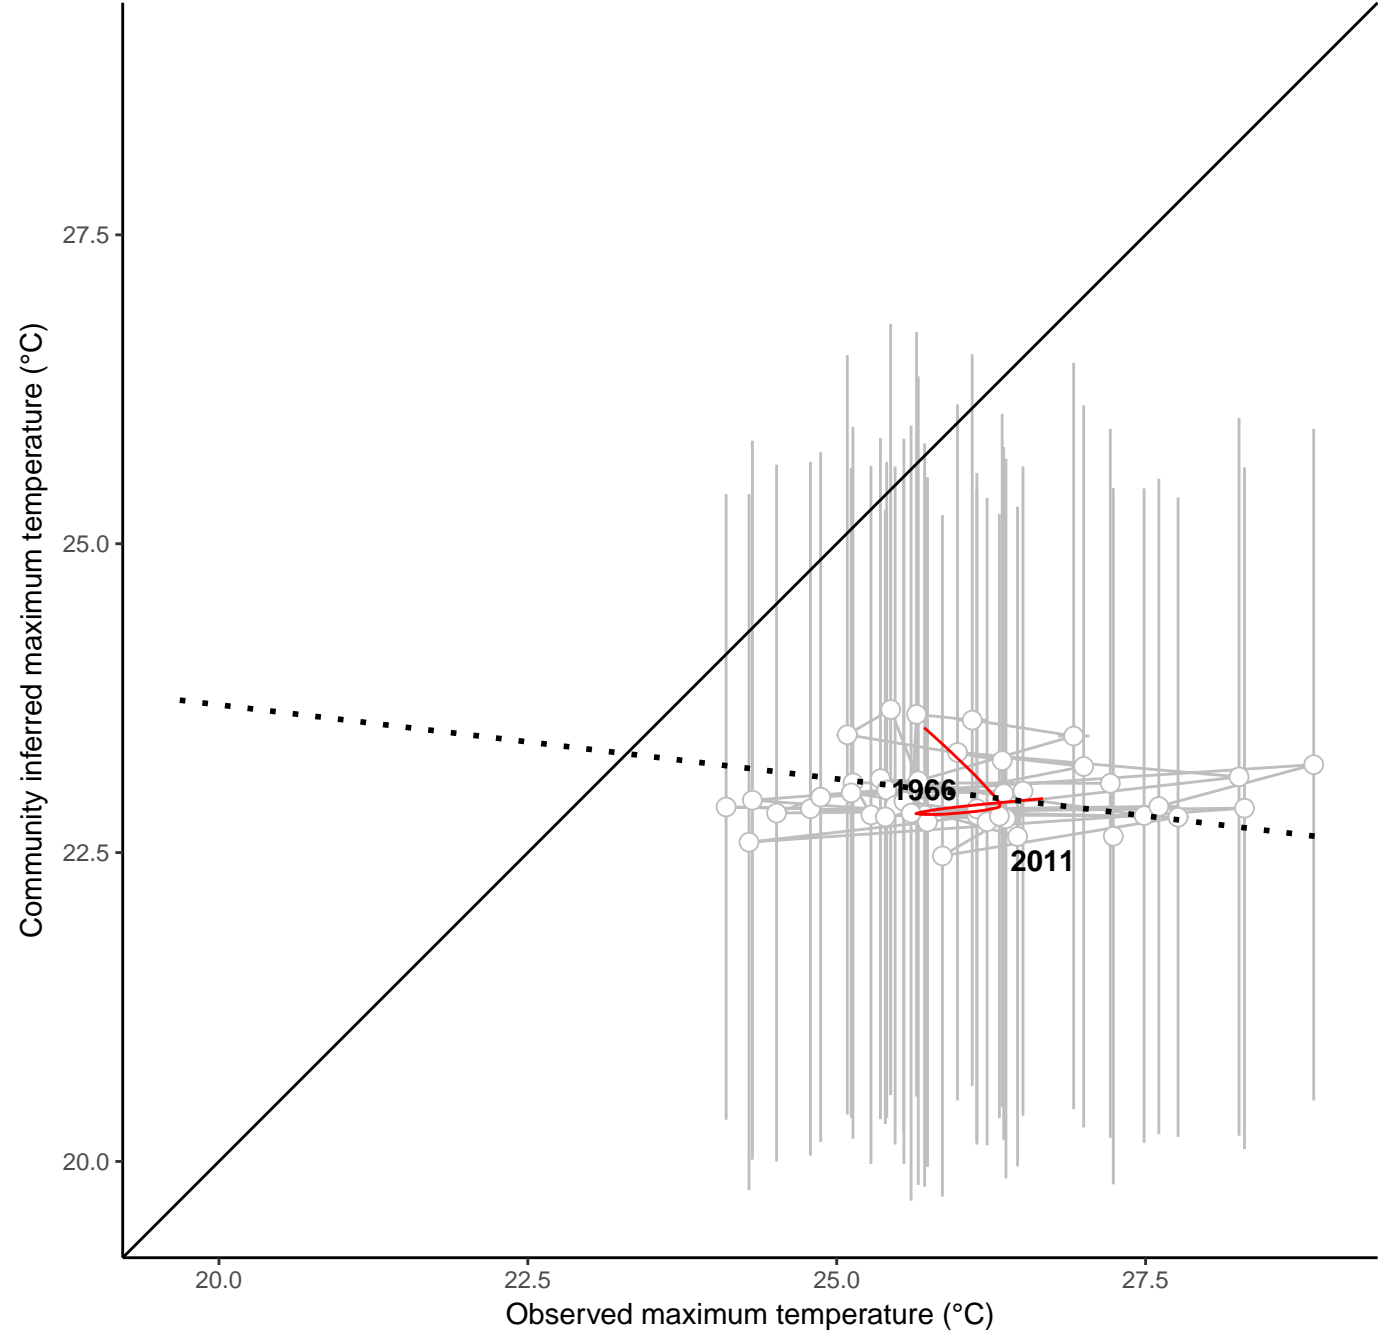

site : 840\_35\_31

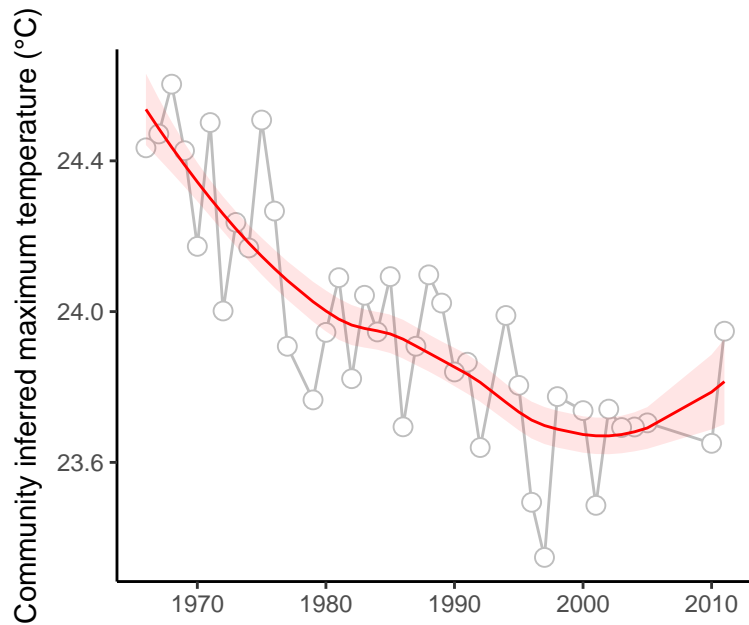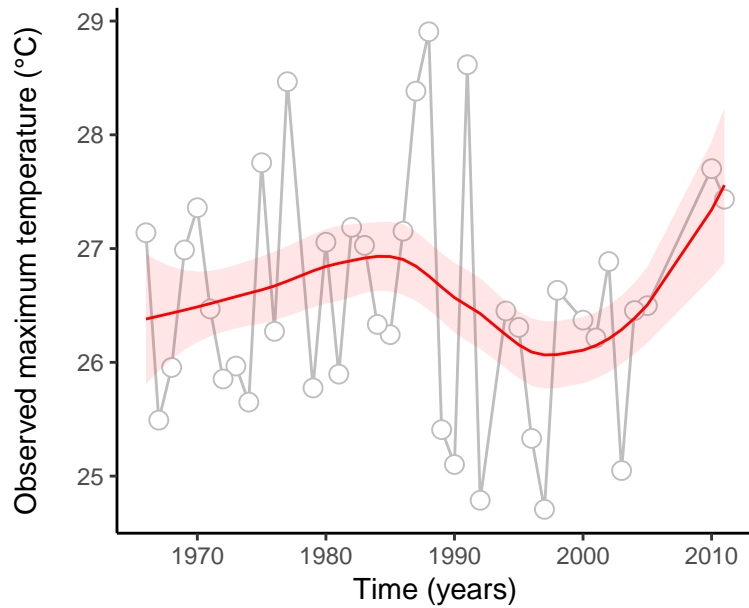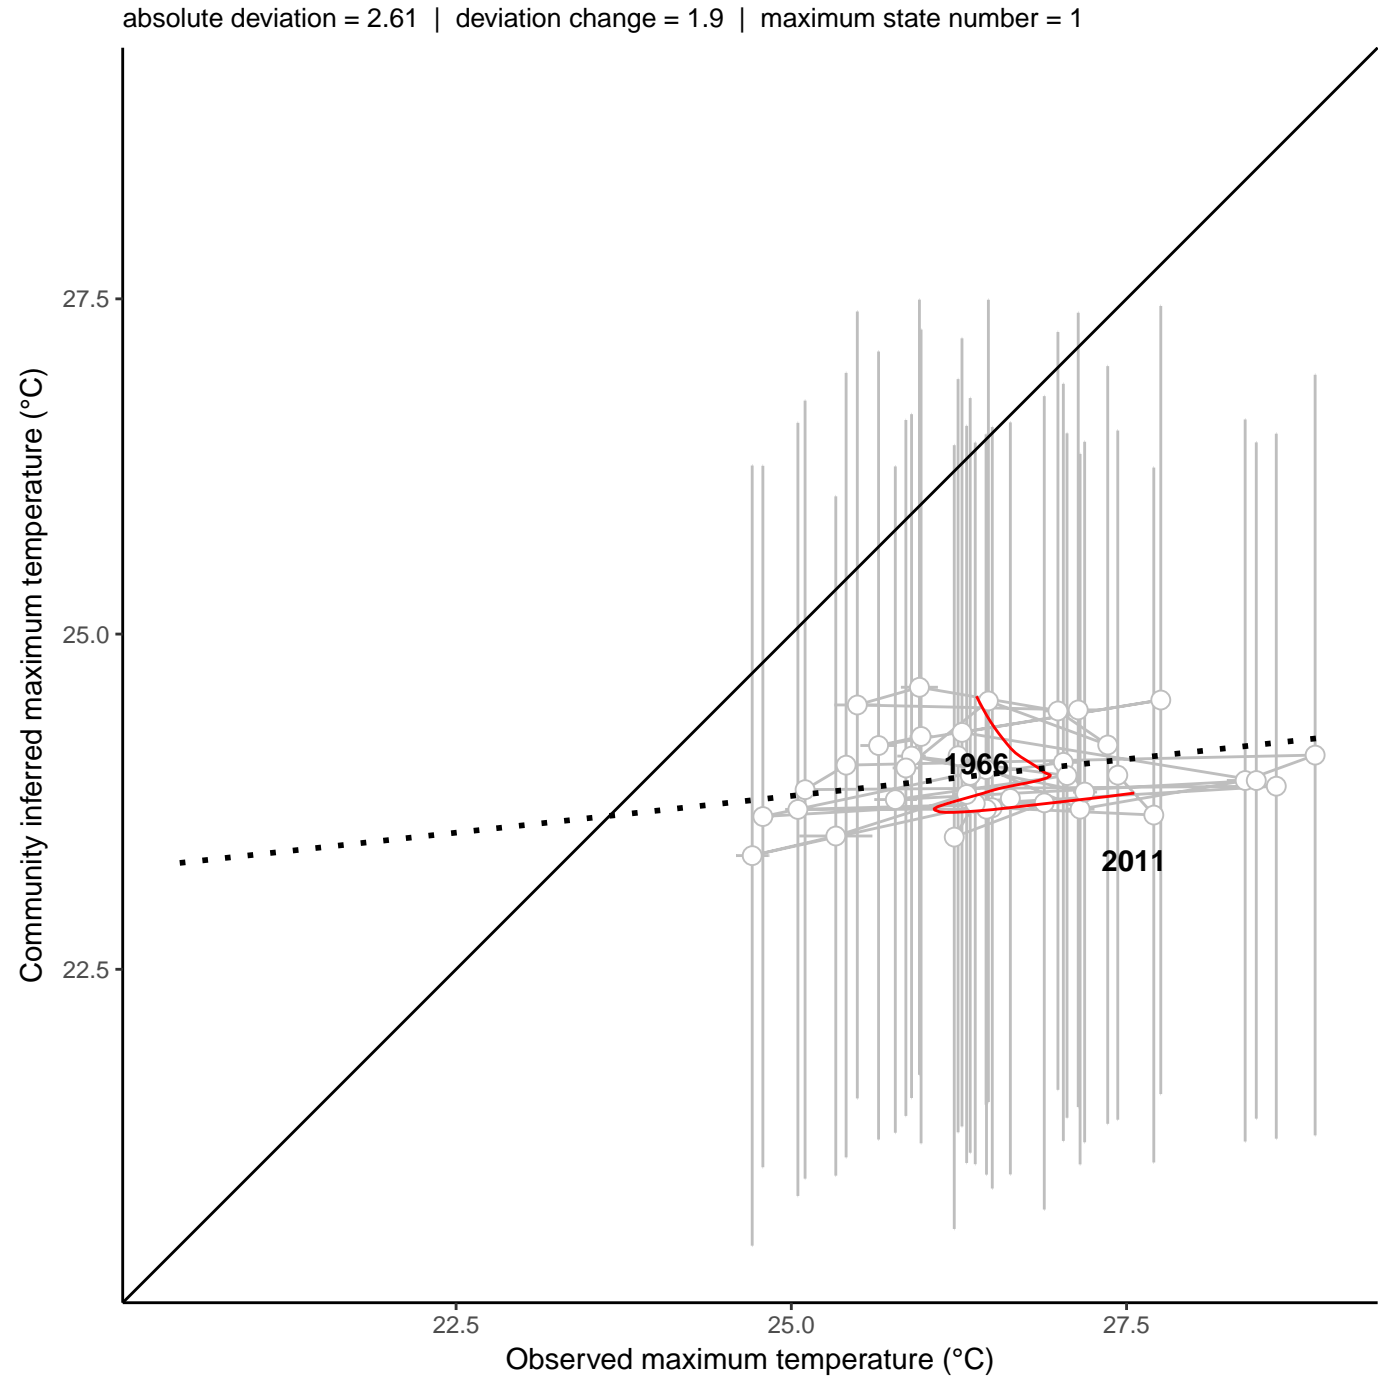



site : 840\_39\_30

absolute deviation = 3.46 | deviation change = 0.92 | maximum state number = 1

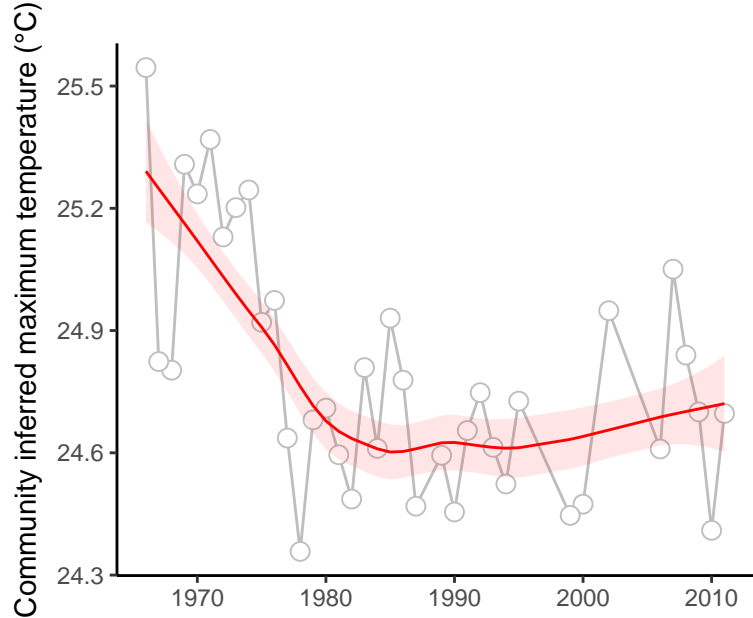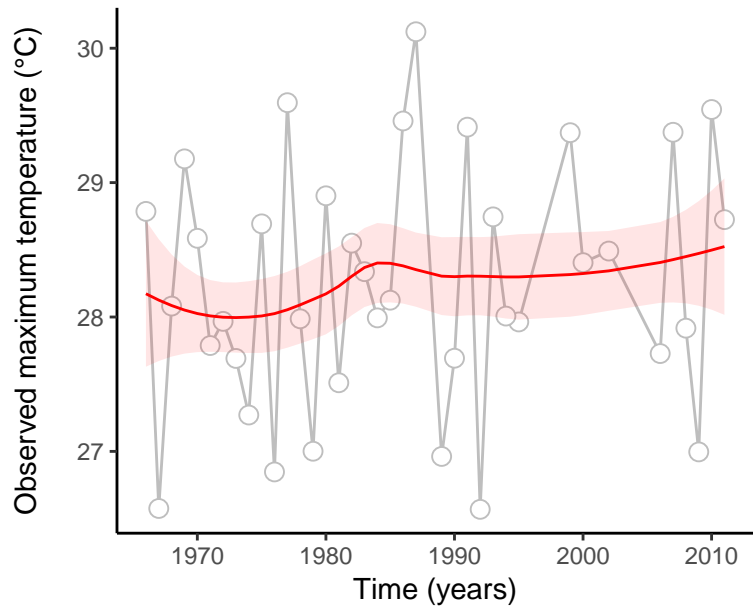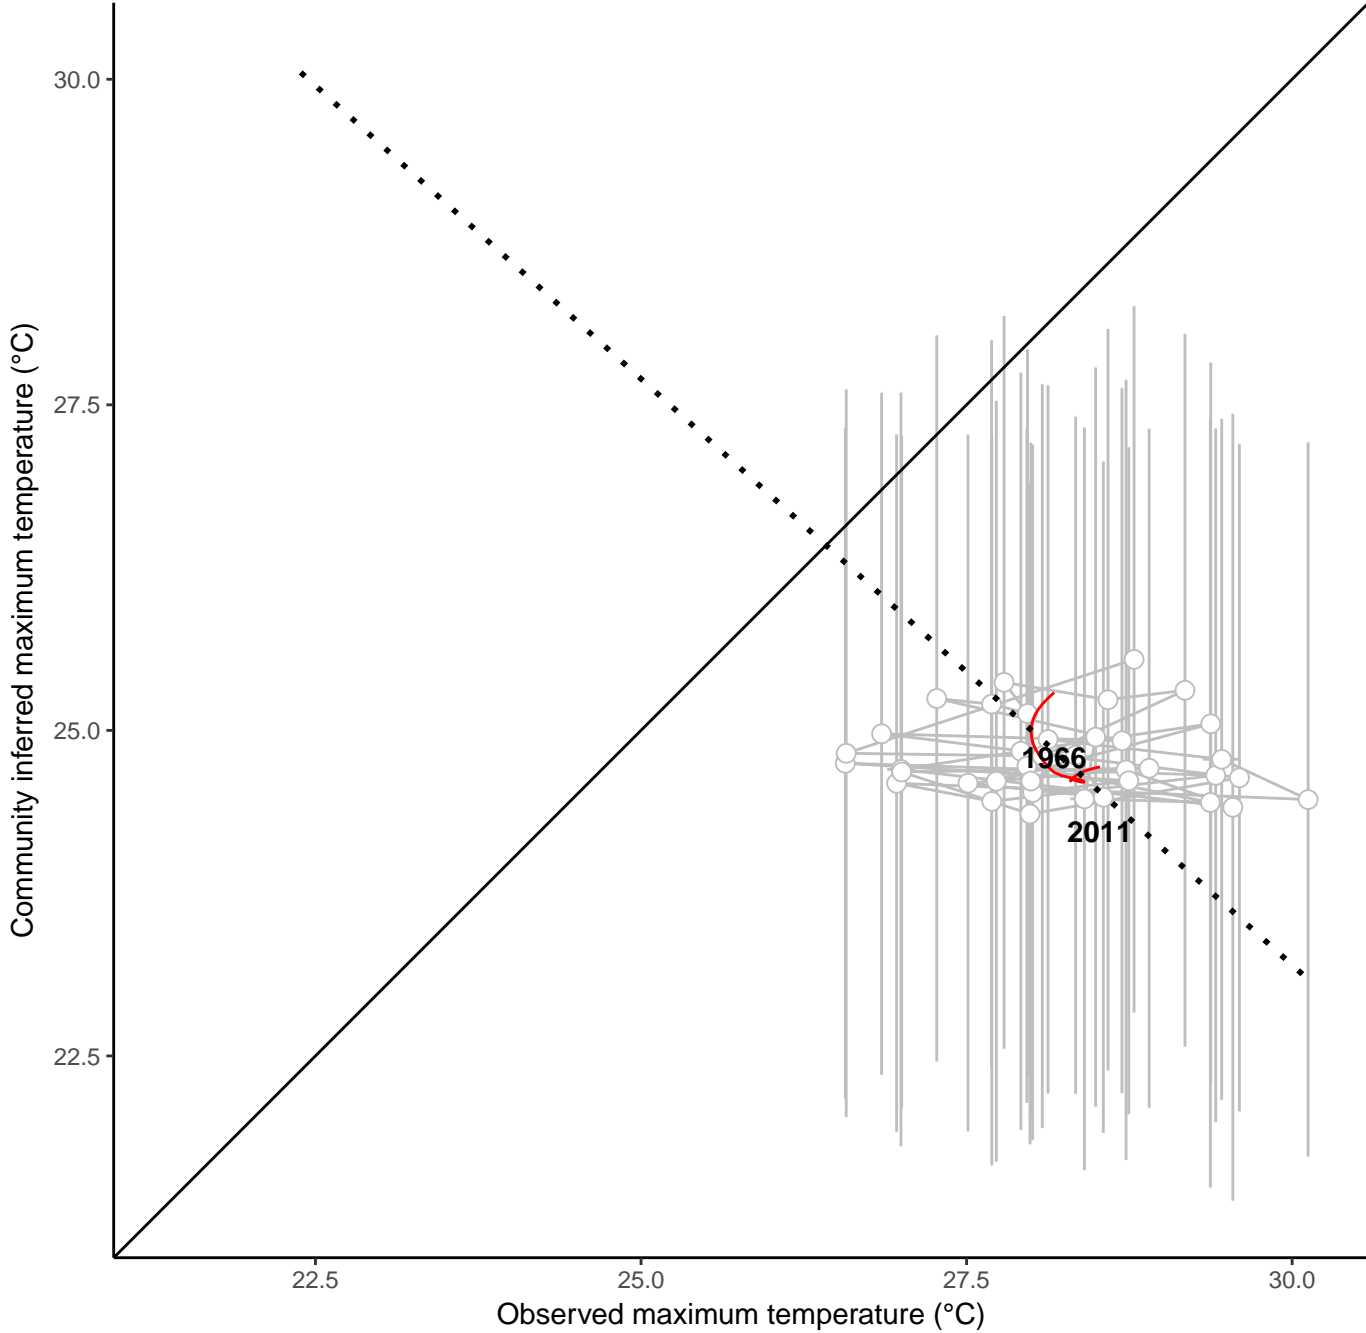

site : 840\_49\_18

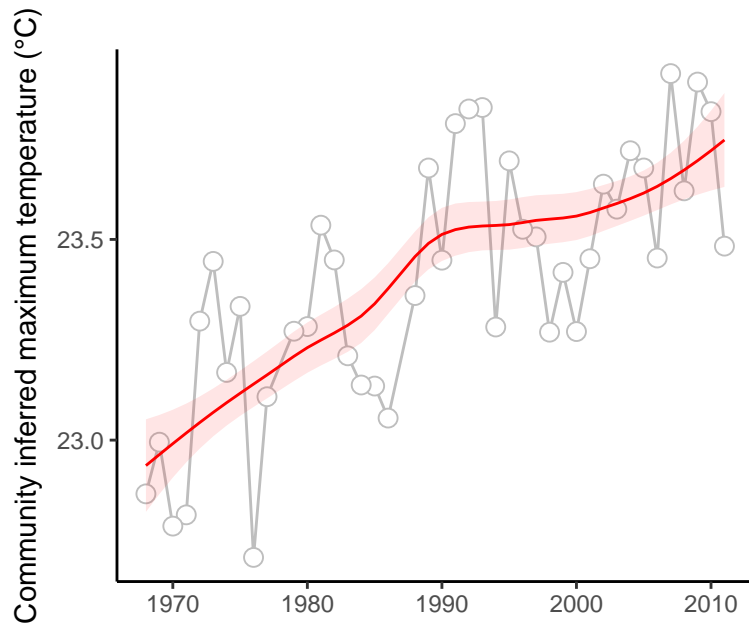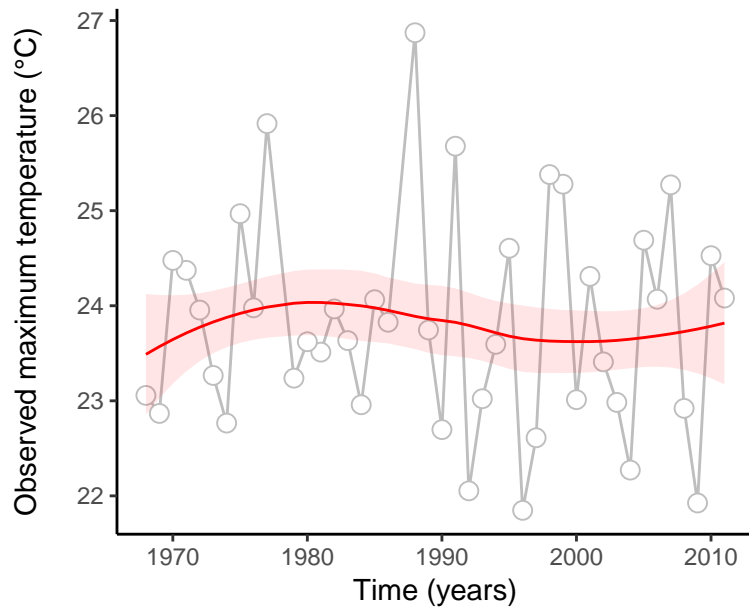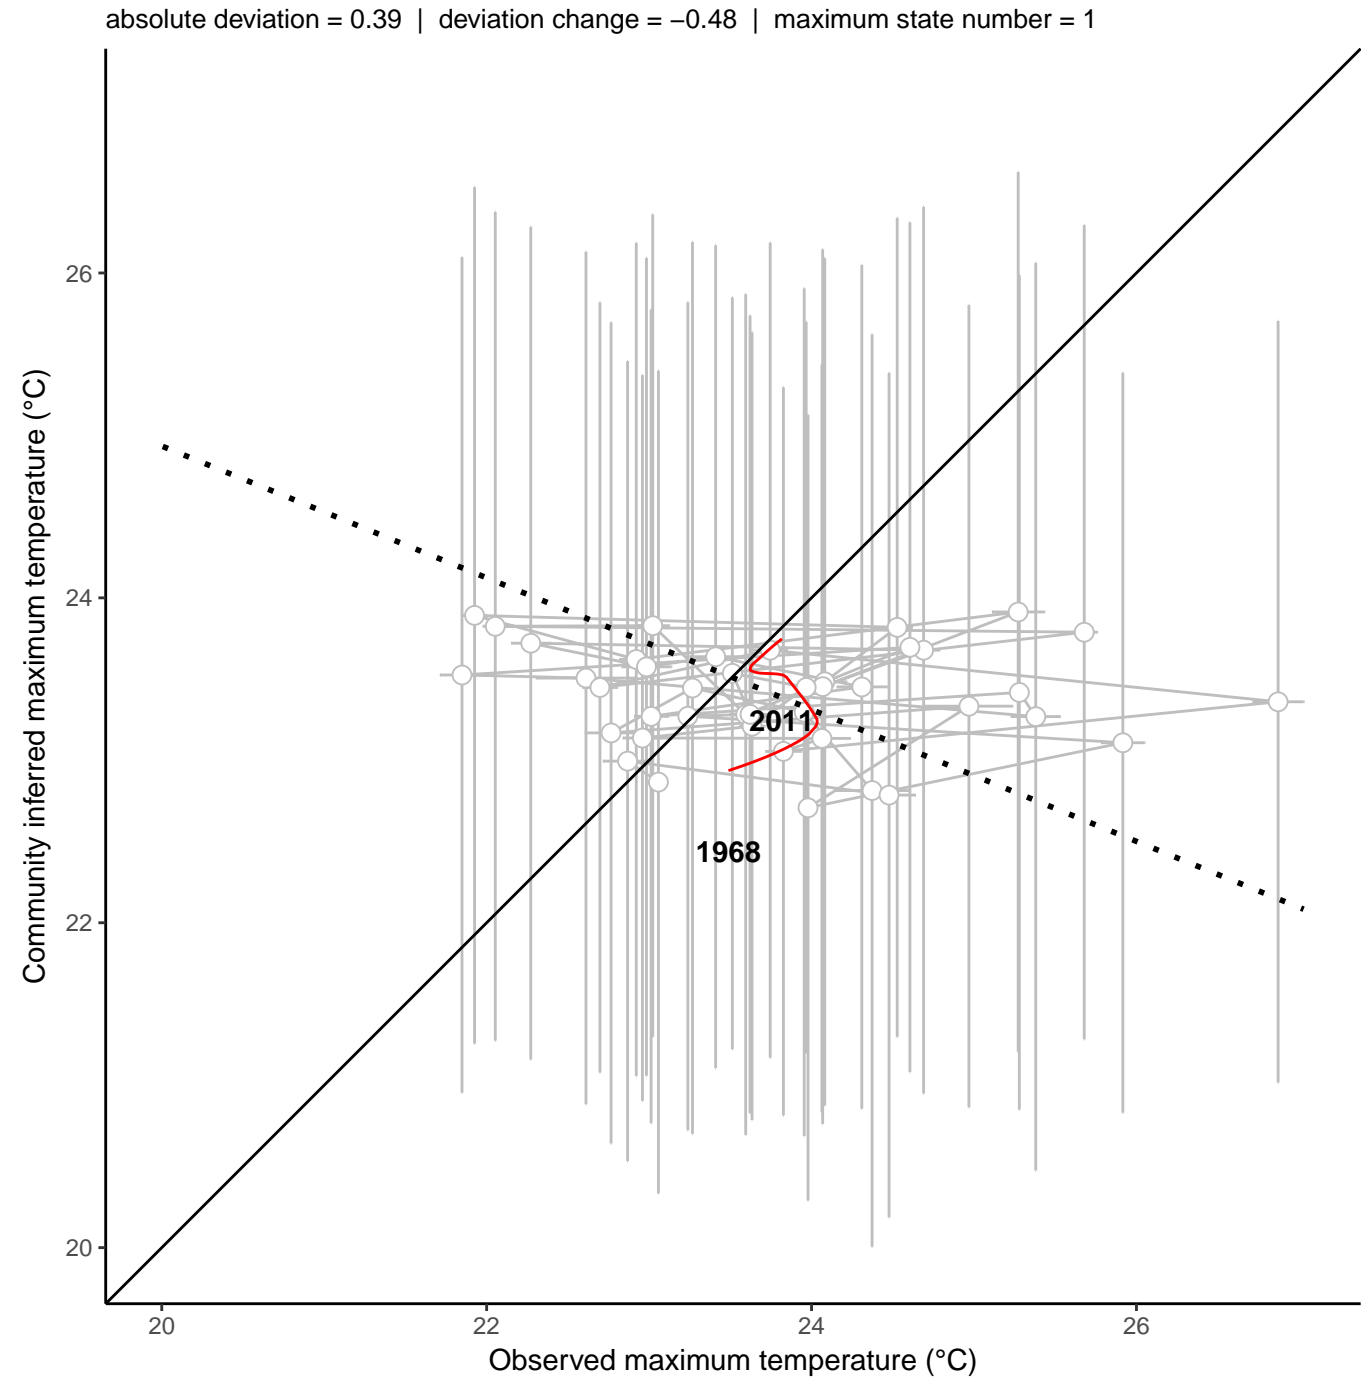

site : 840\_6\_29

absolute deviation = 4.25 | deviation change = 0.05 | maximum state number = 2

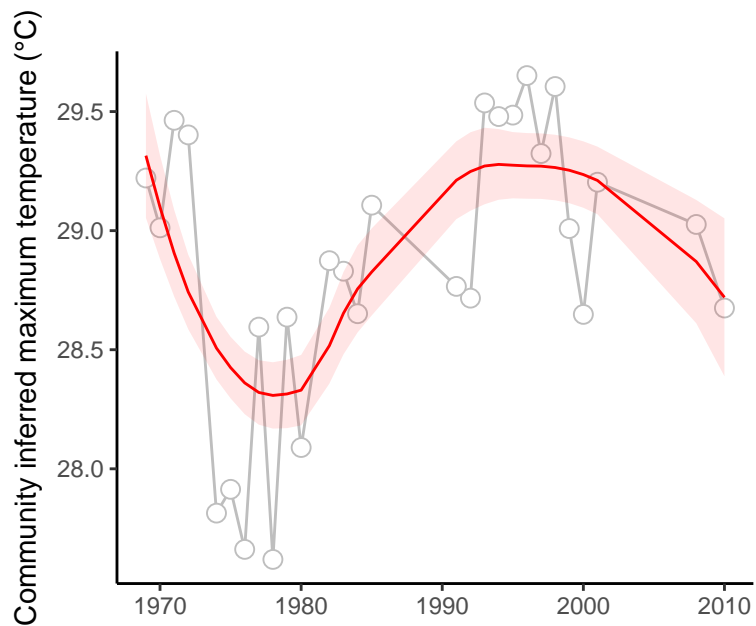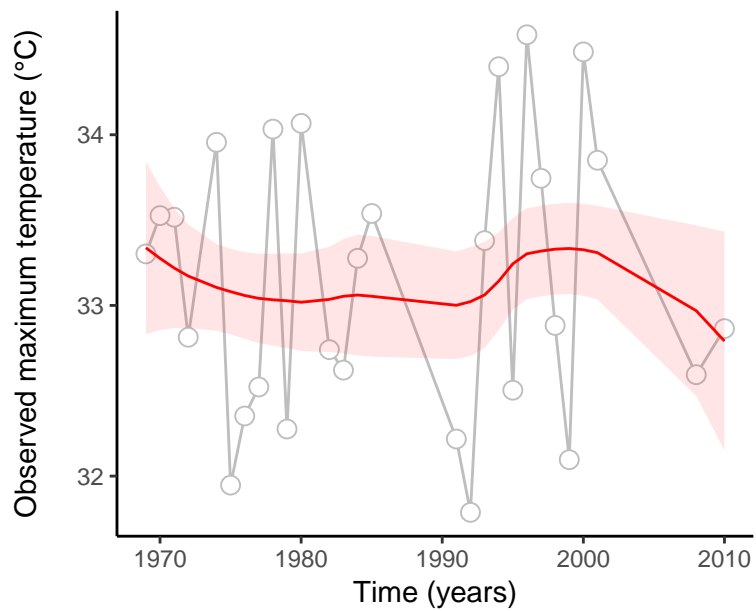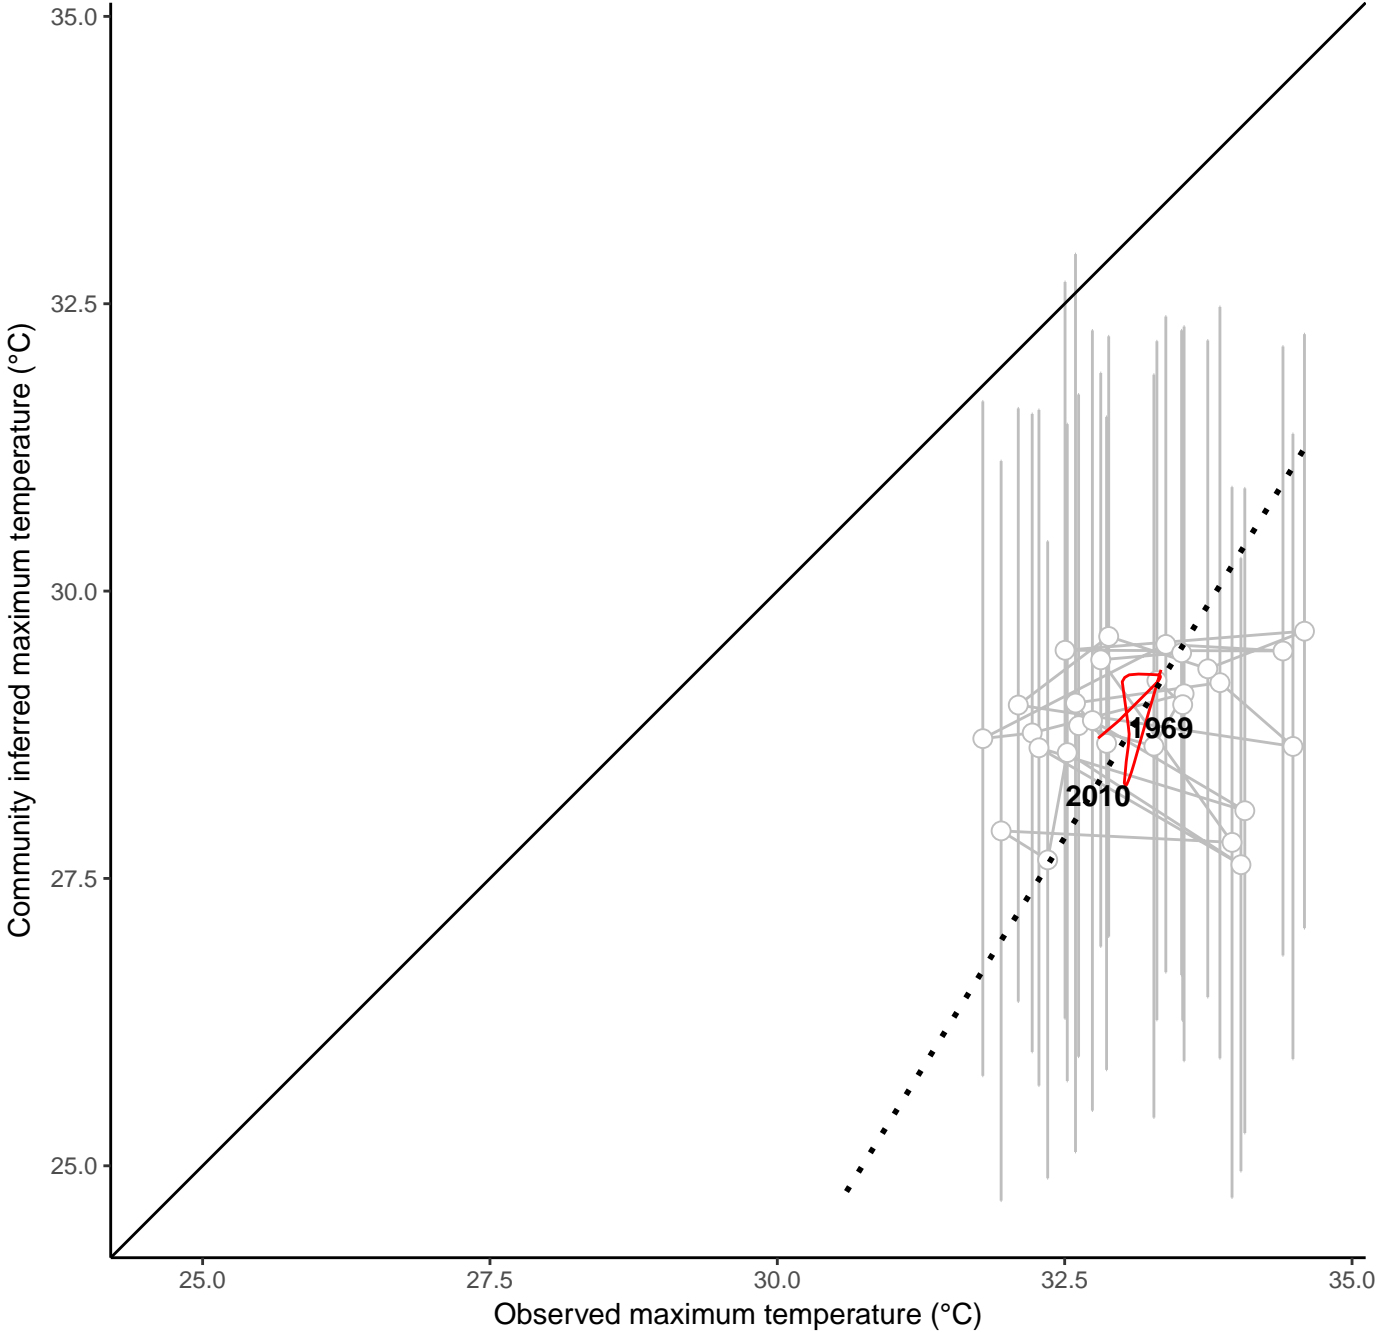

site : 840\_61\_31

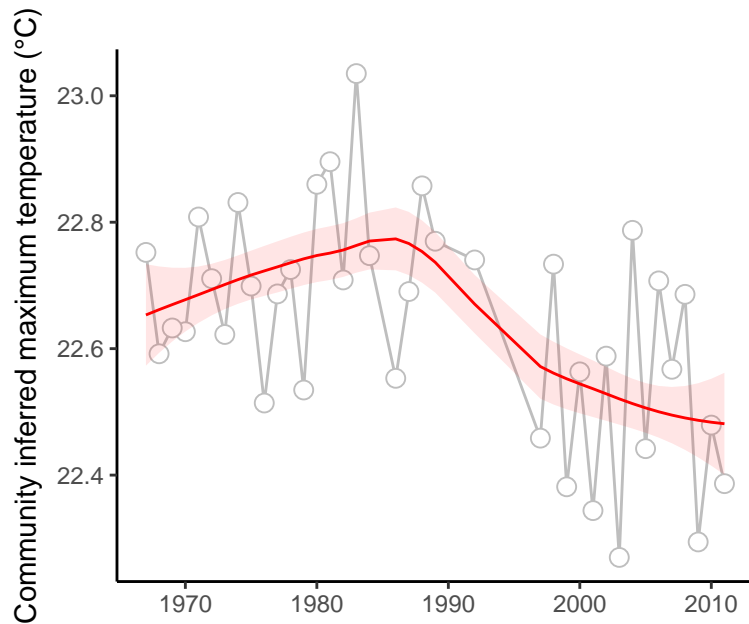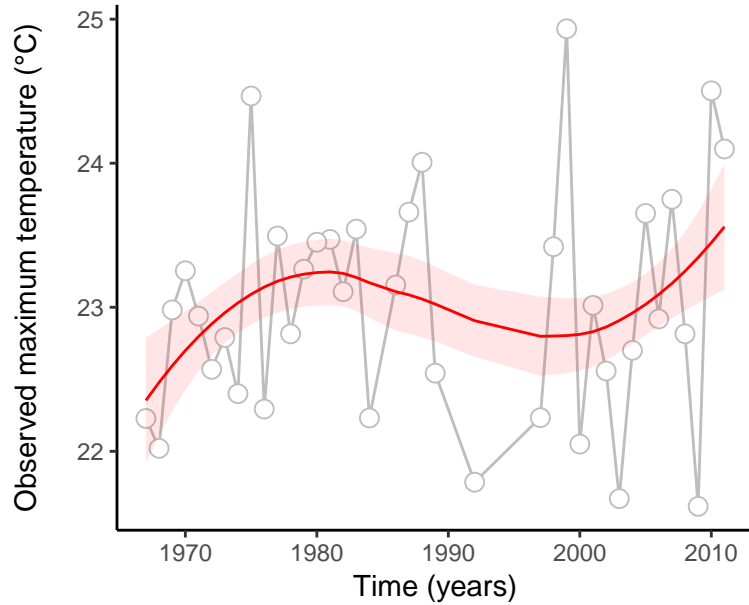

absolute deviation = 0.37 | deviation change = 0.78 | maximum state number = 1

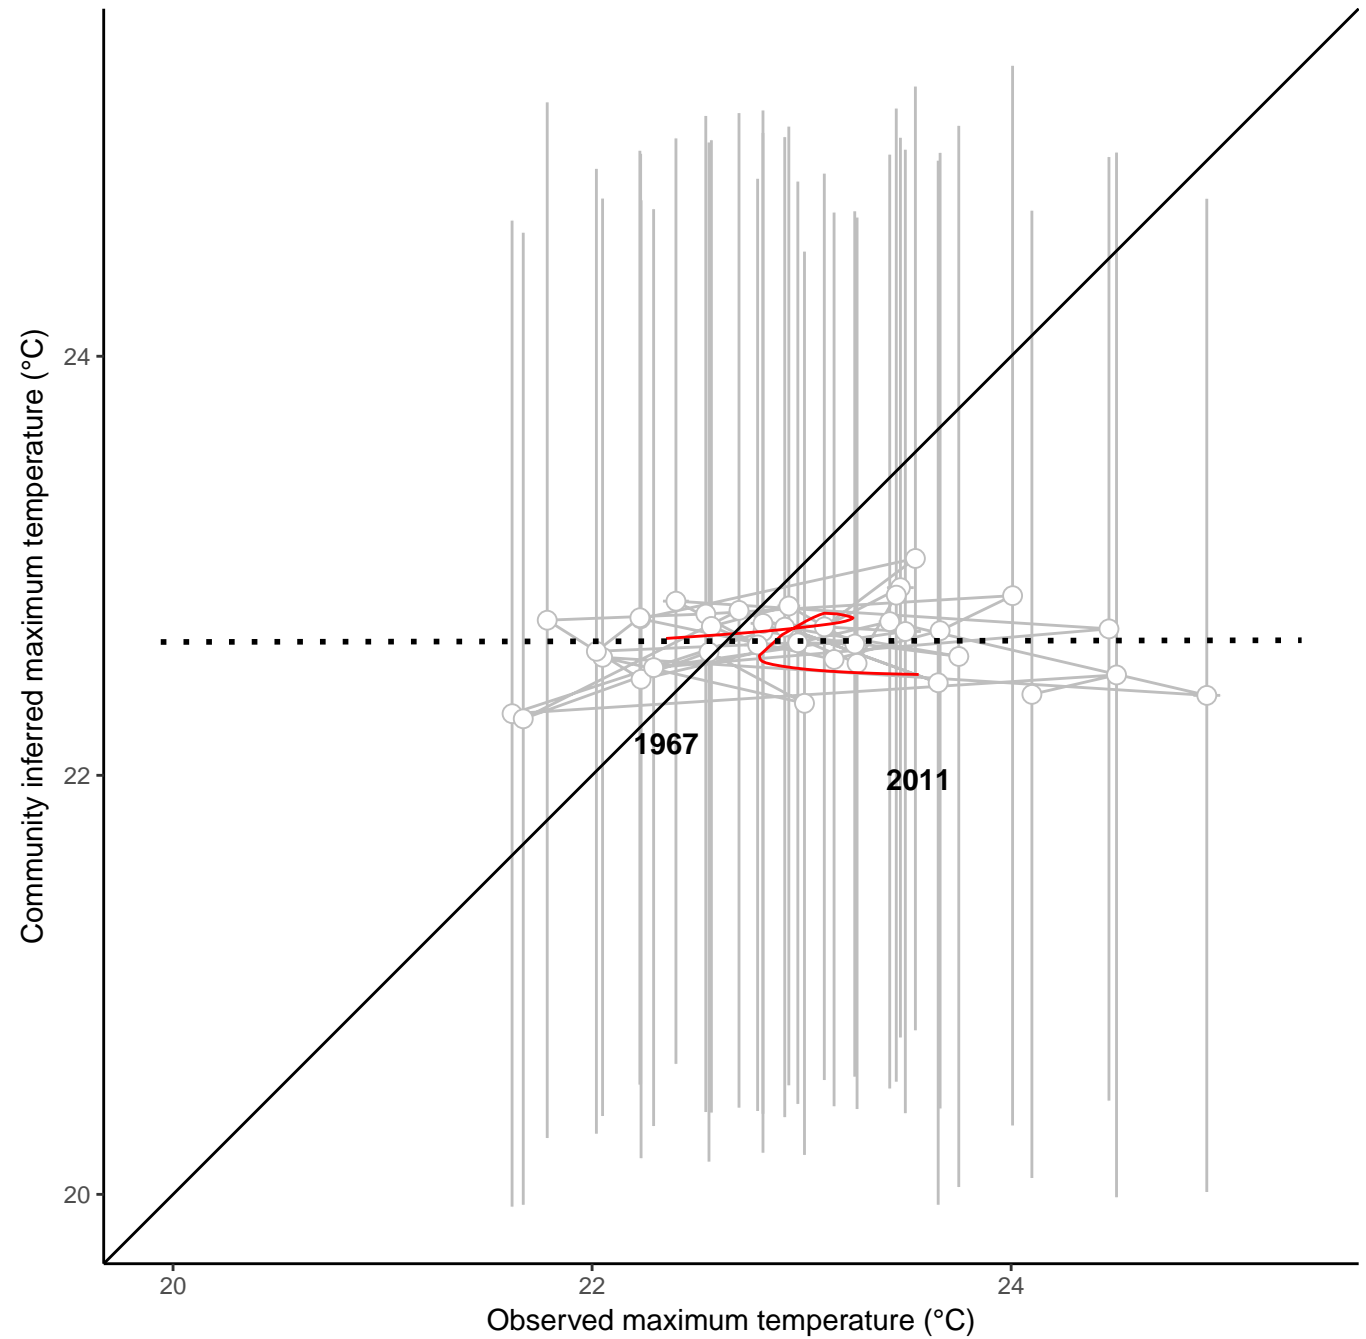

site : 840\_66\_75

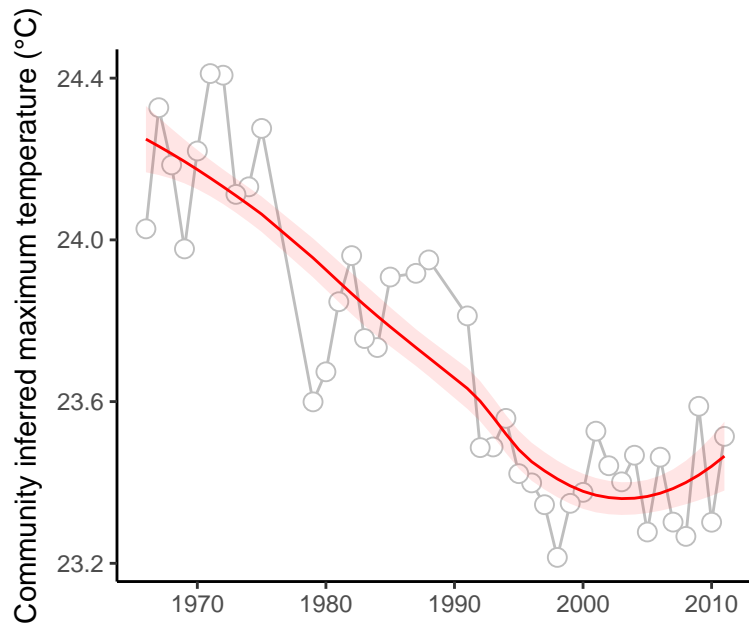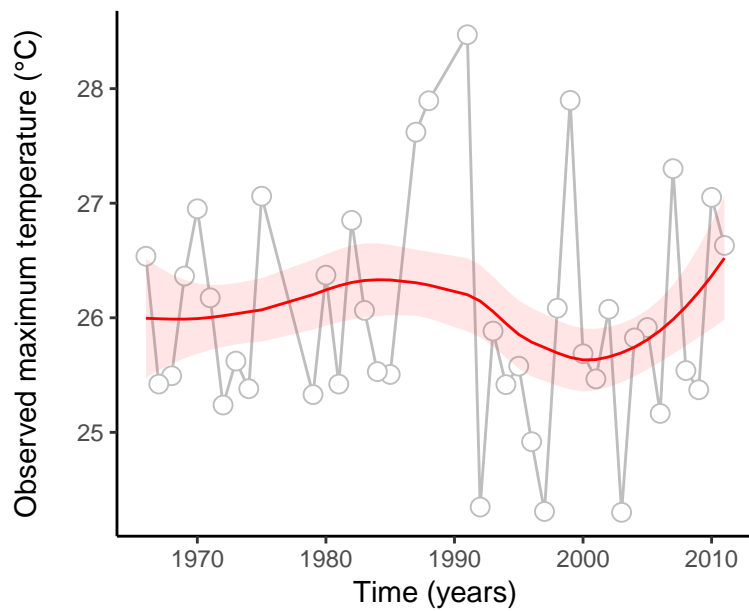

absolute deviation = 2.32 | deviation change = 1.31 | maximum state number = 2

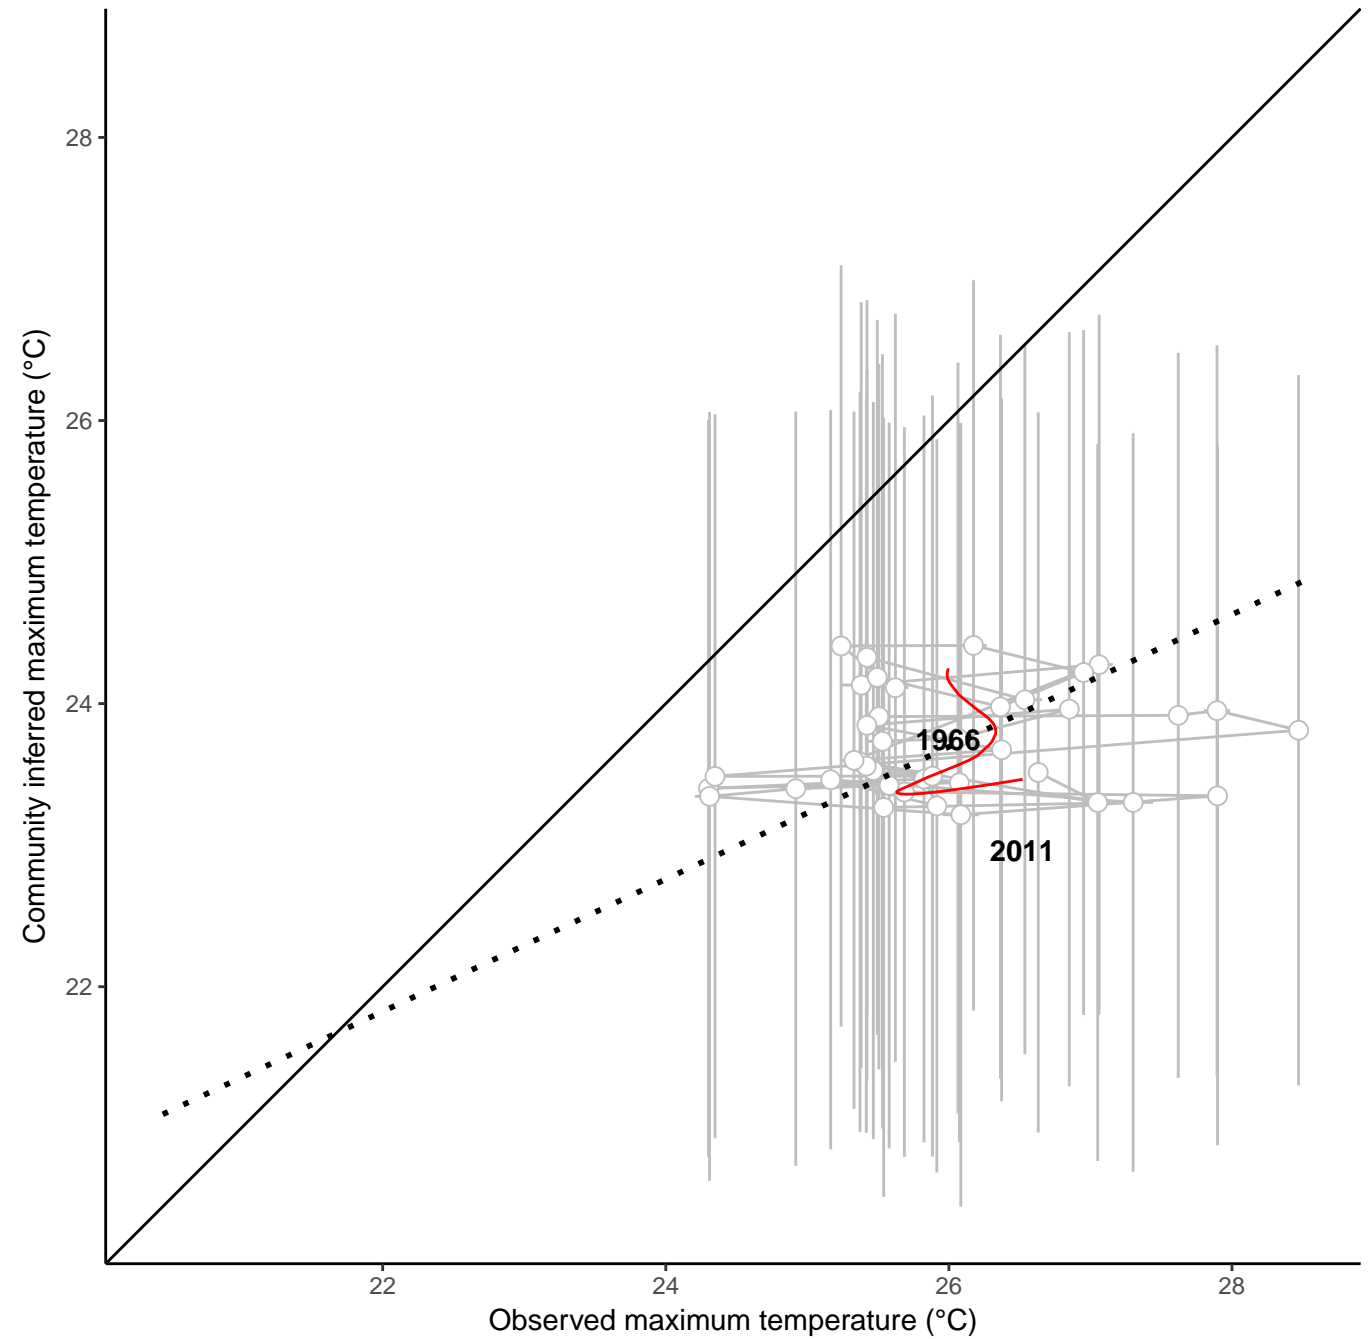

site : 840\_67\_11

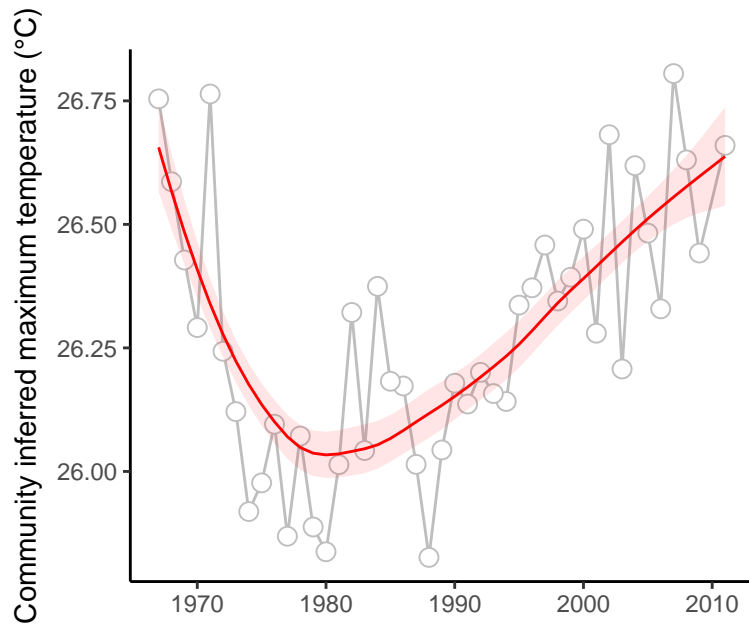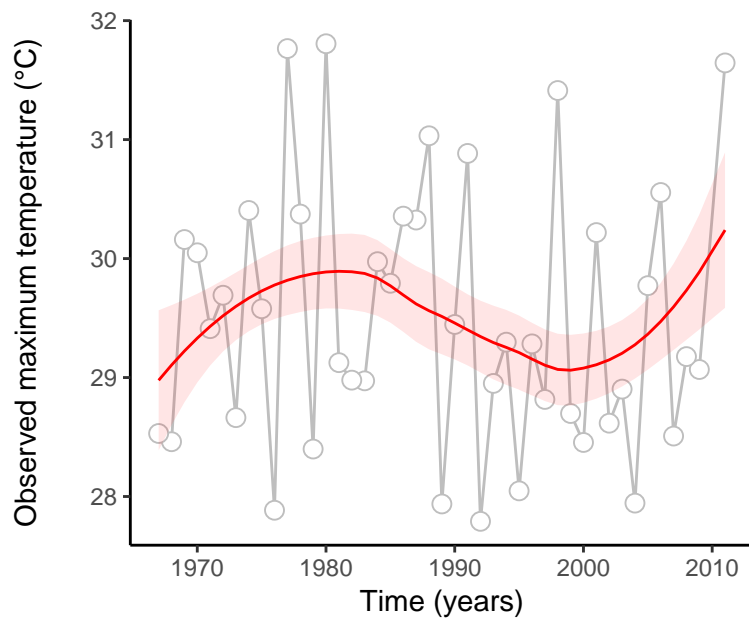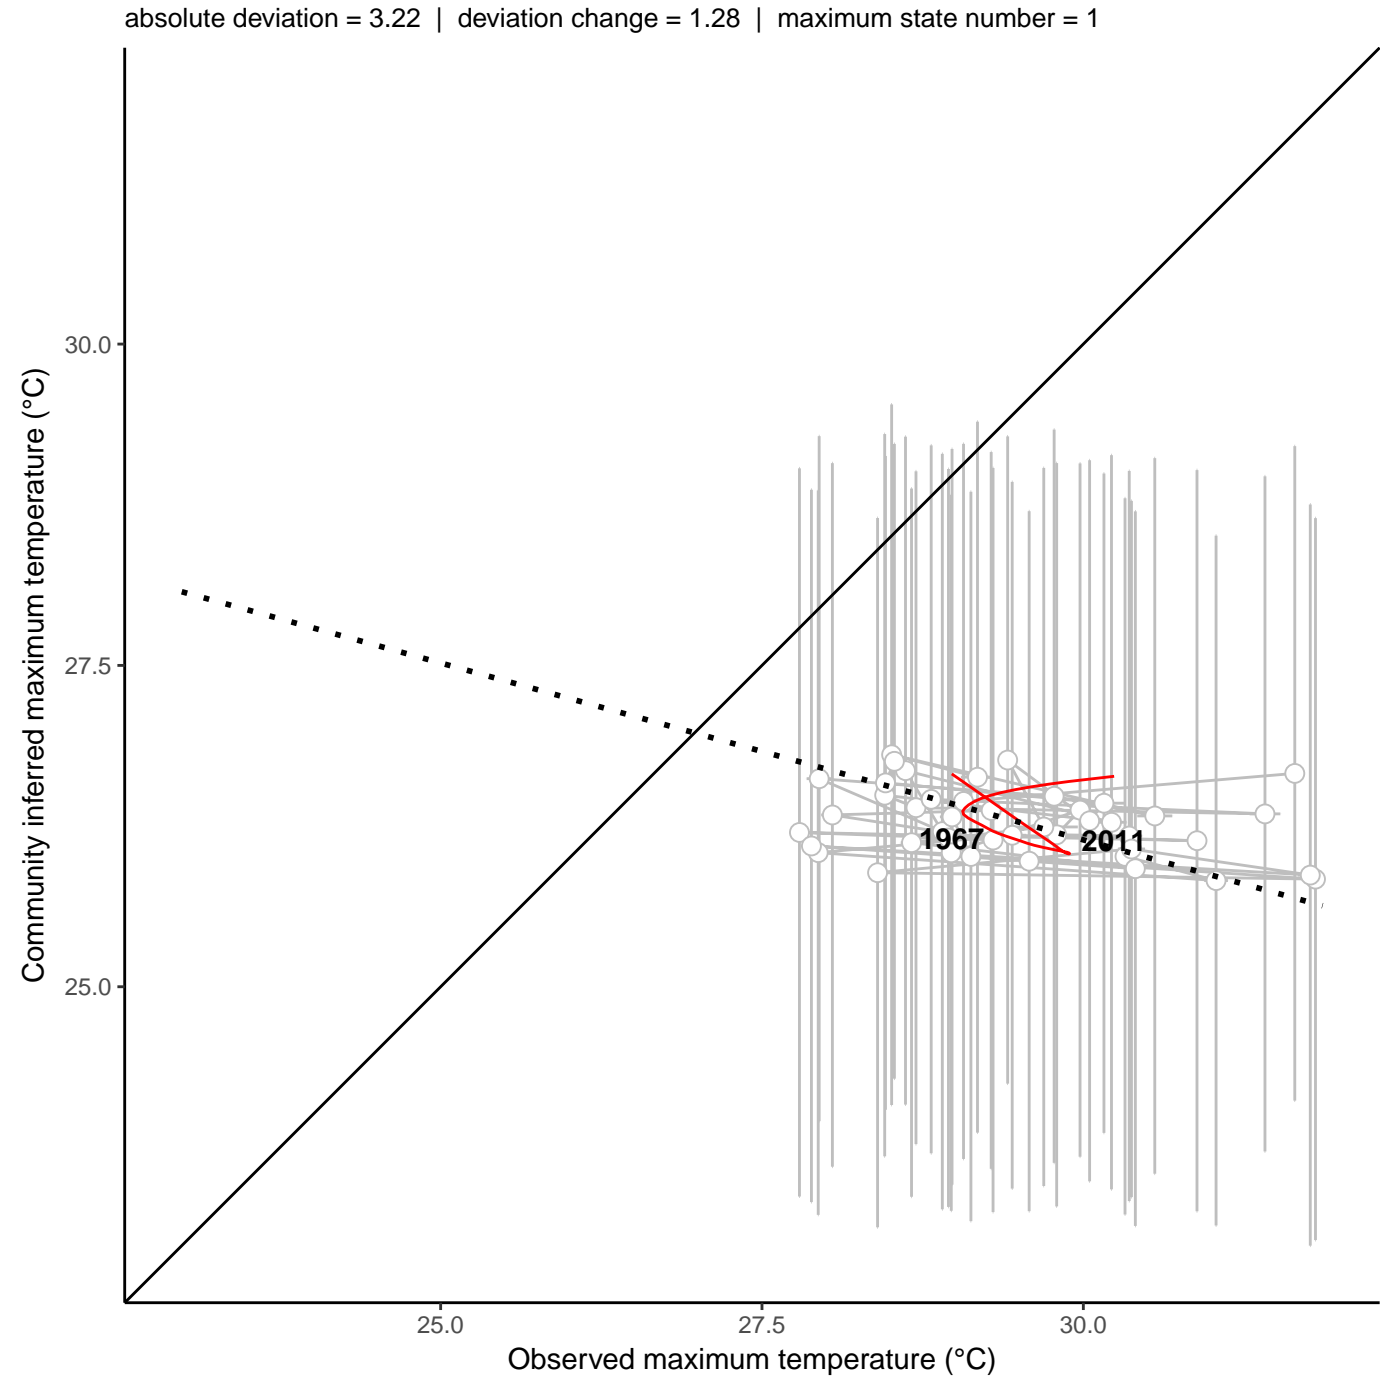

site : 840\_7\_22

absolute deviation = 4.21 | deviation change = 0.83 | maximum state number = 2

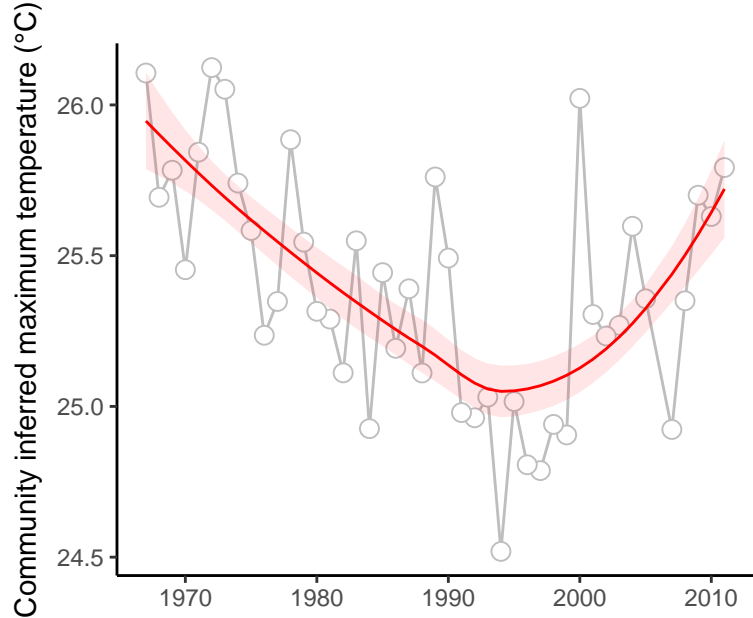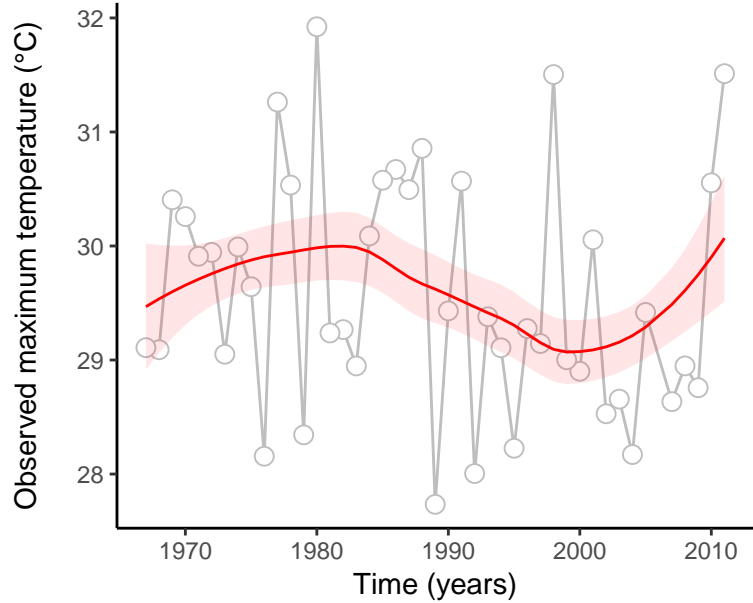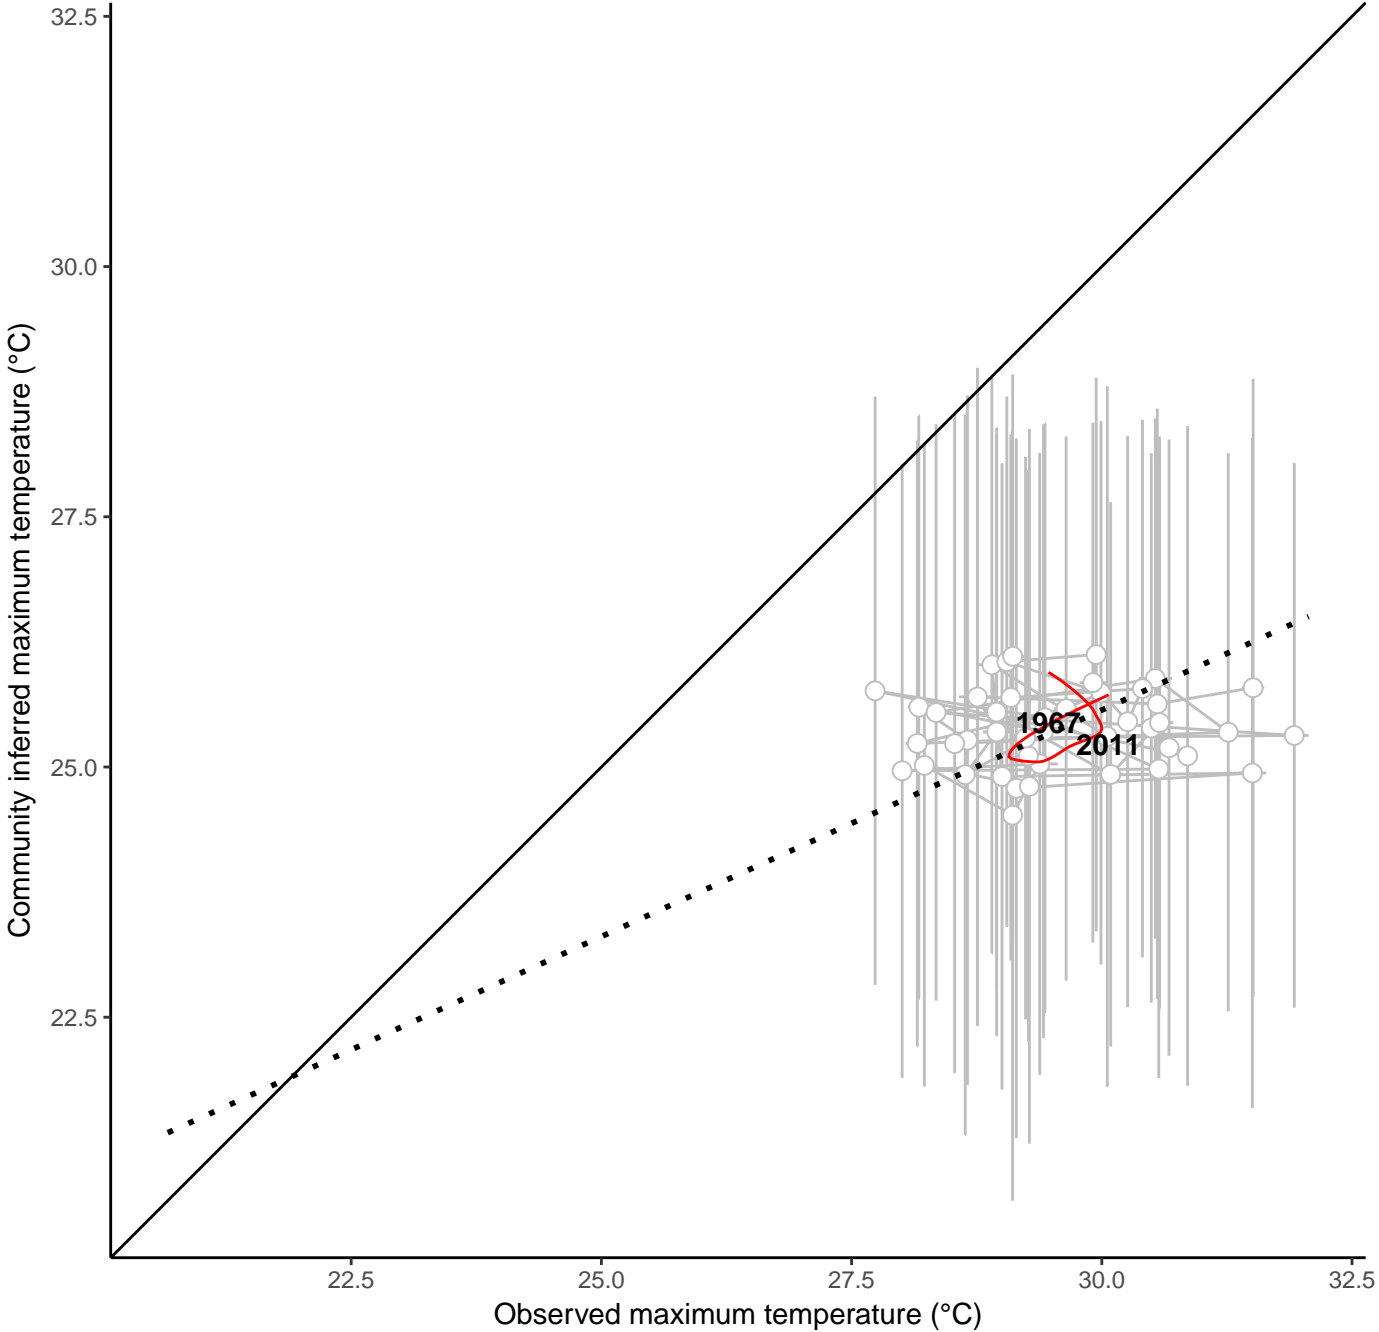

site : 840\_72\_35

absolute deviation = 0.68 | deviation change = 0.94 | maximum state number = 1

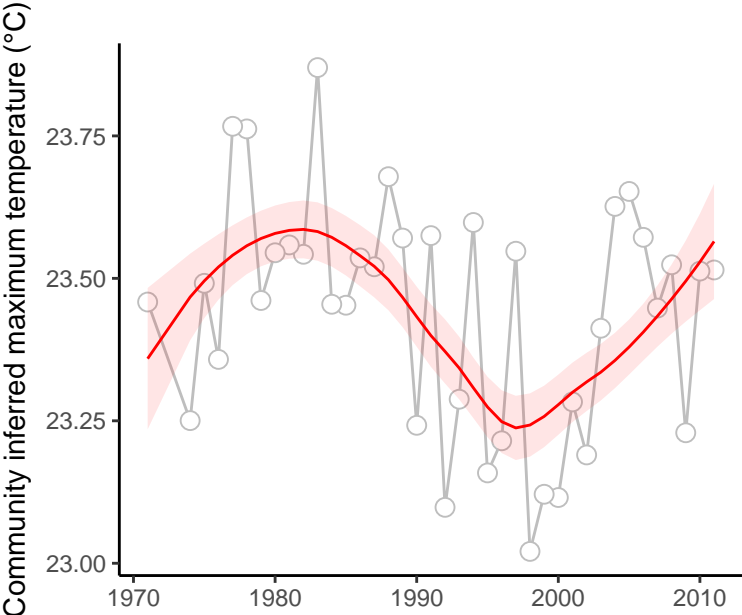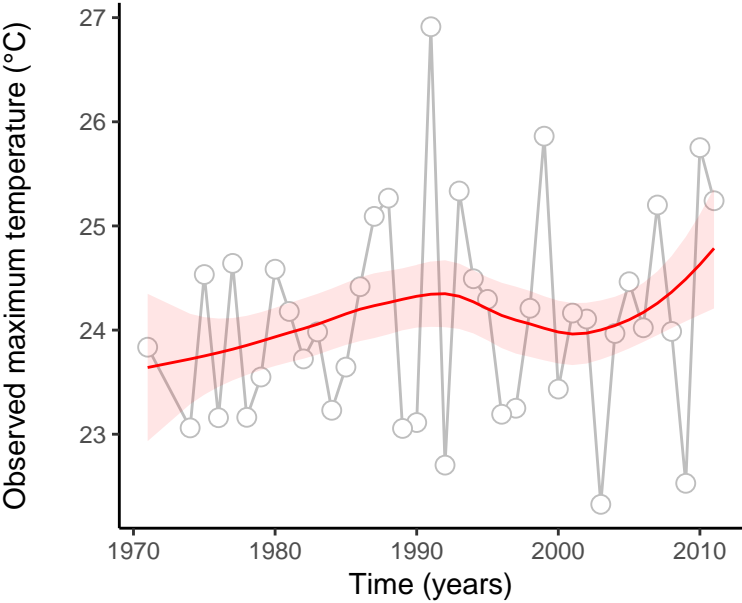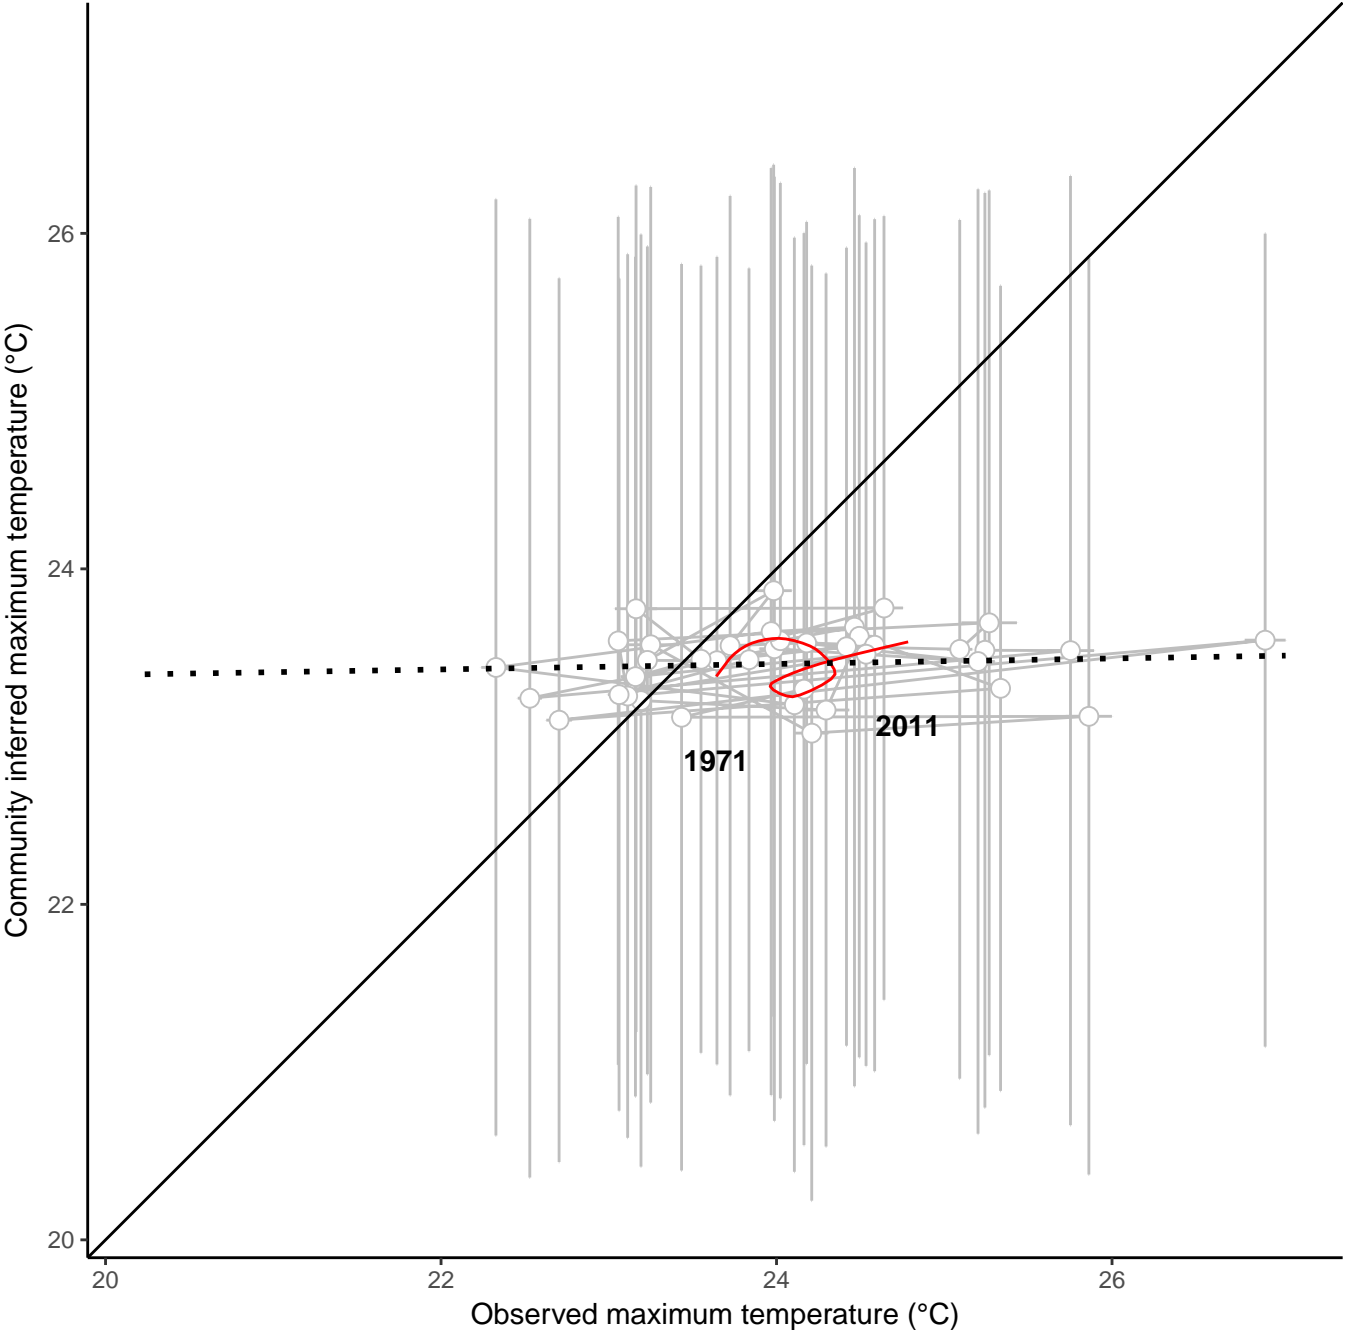



site : 840\_82\_7

absolute deviation = 3.04 | deviation change = 0.25 | maximum state number = 1

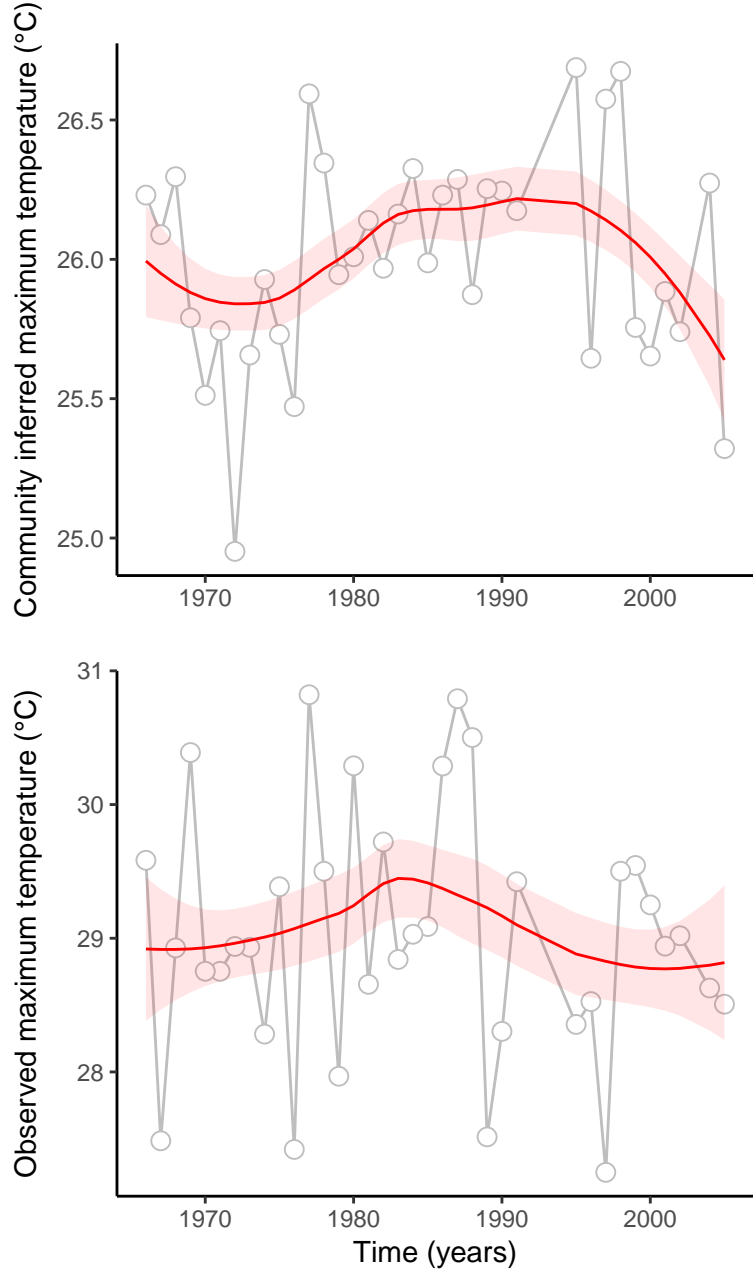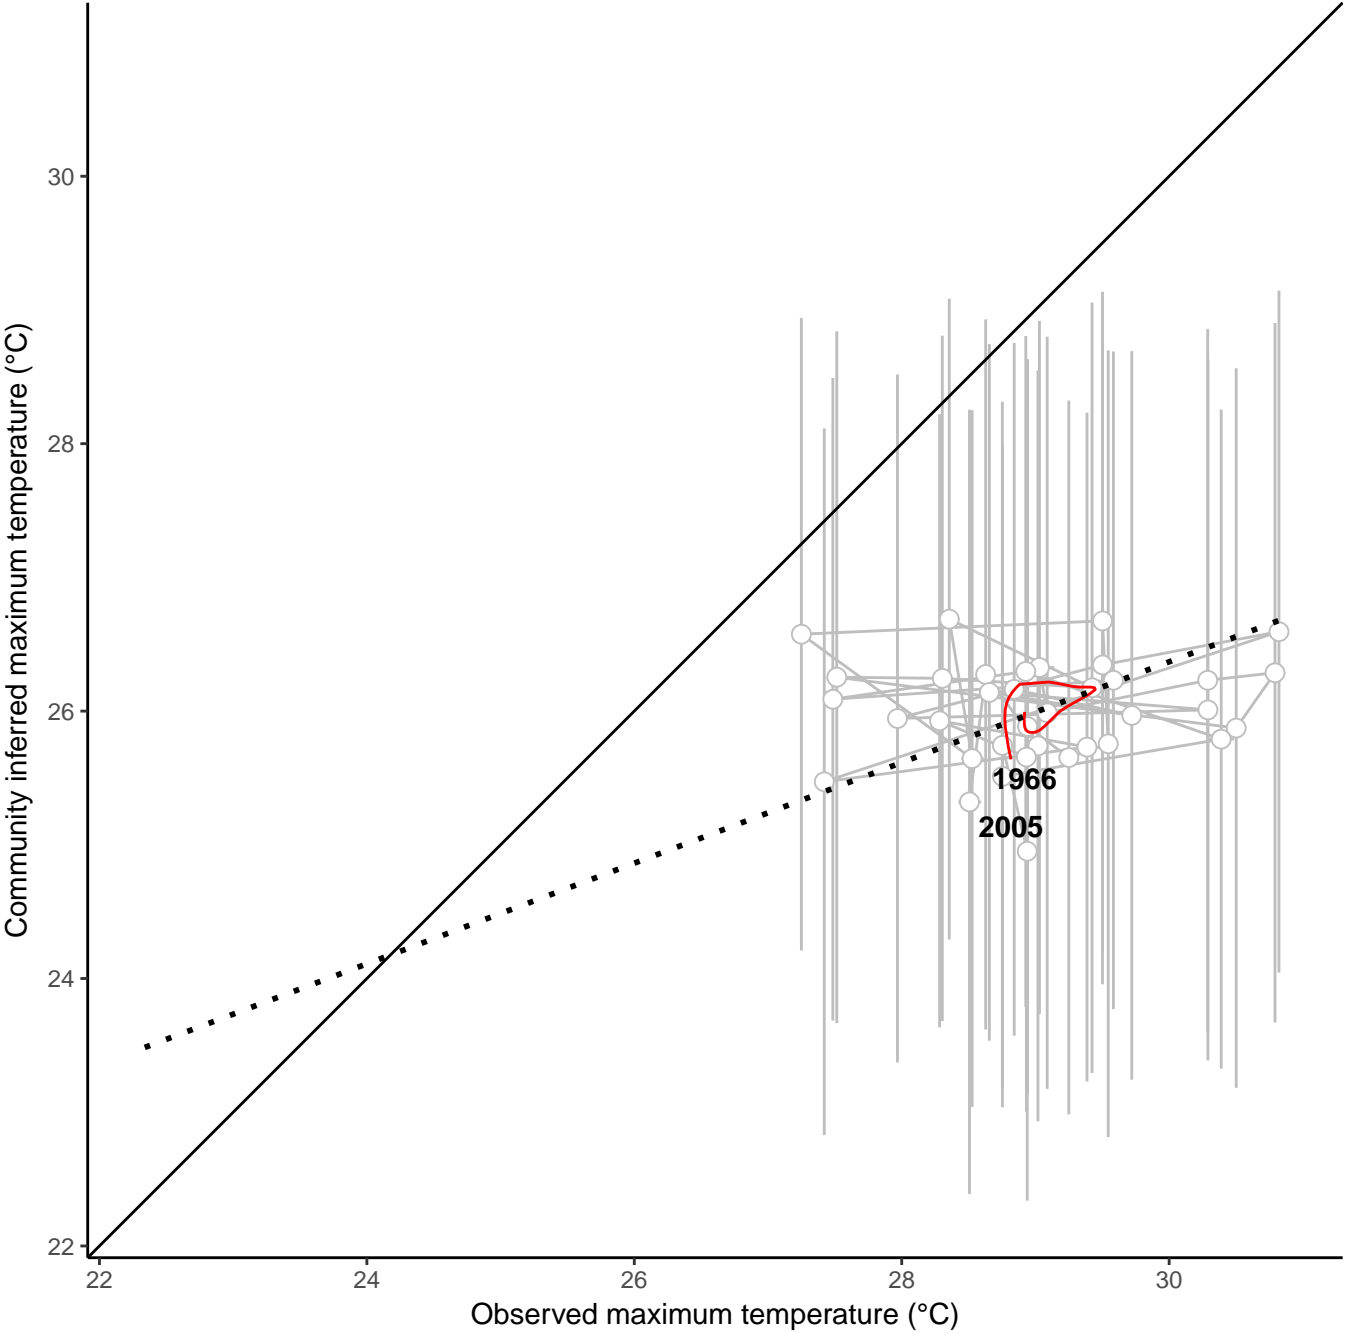

site : 840\_88\_22

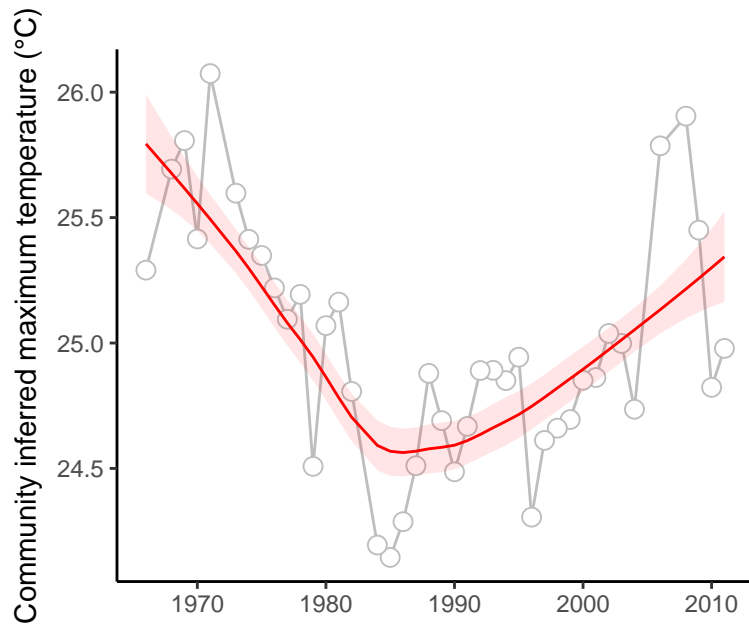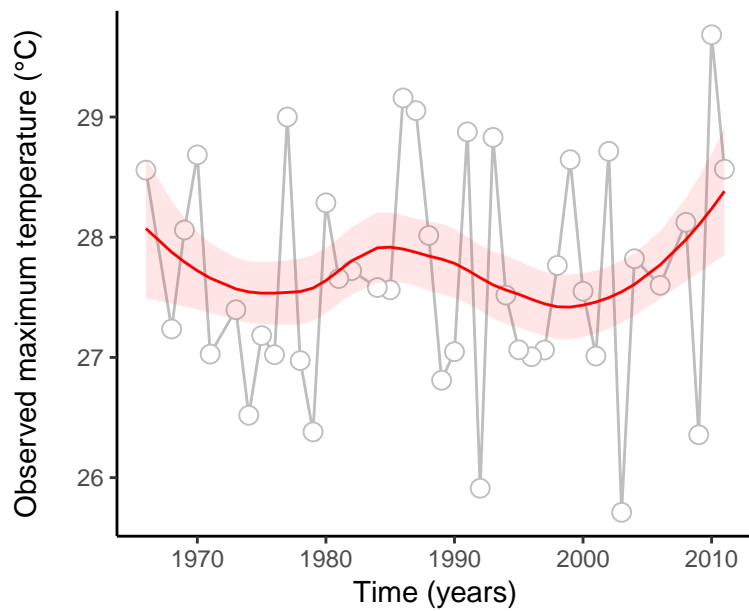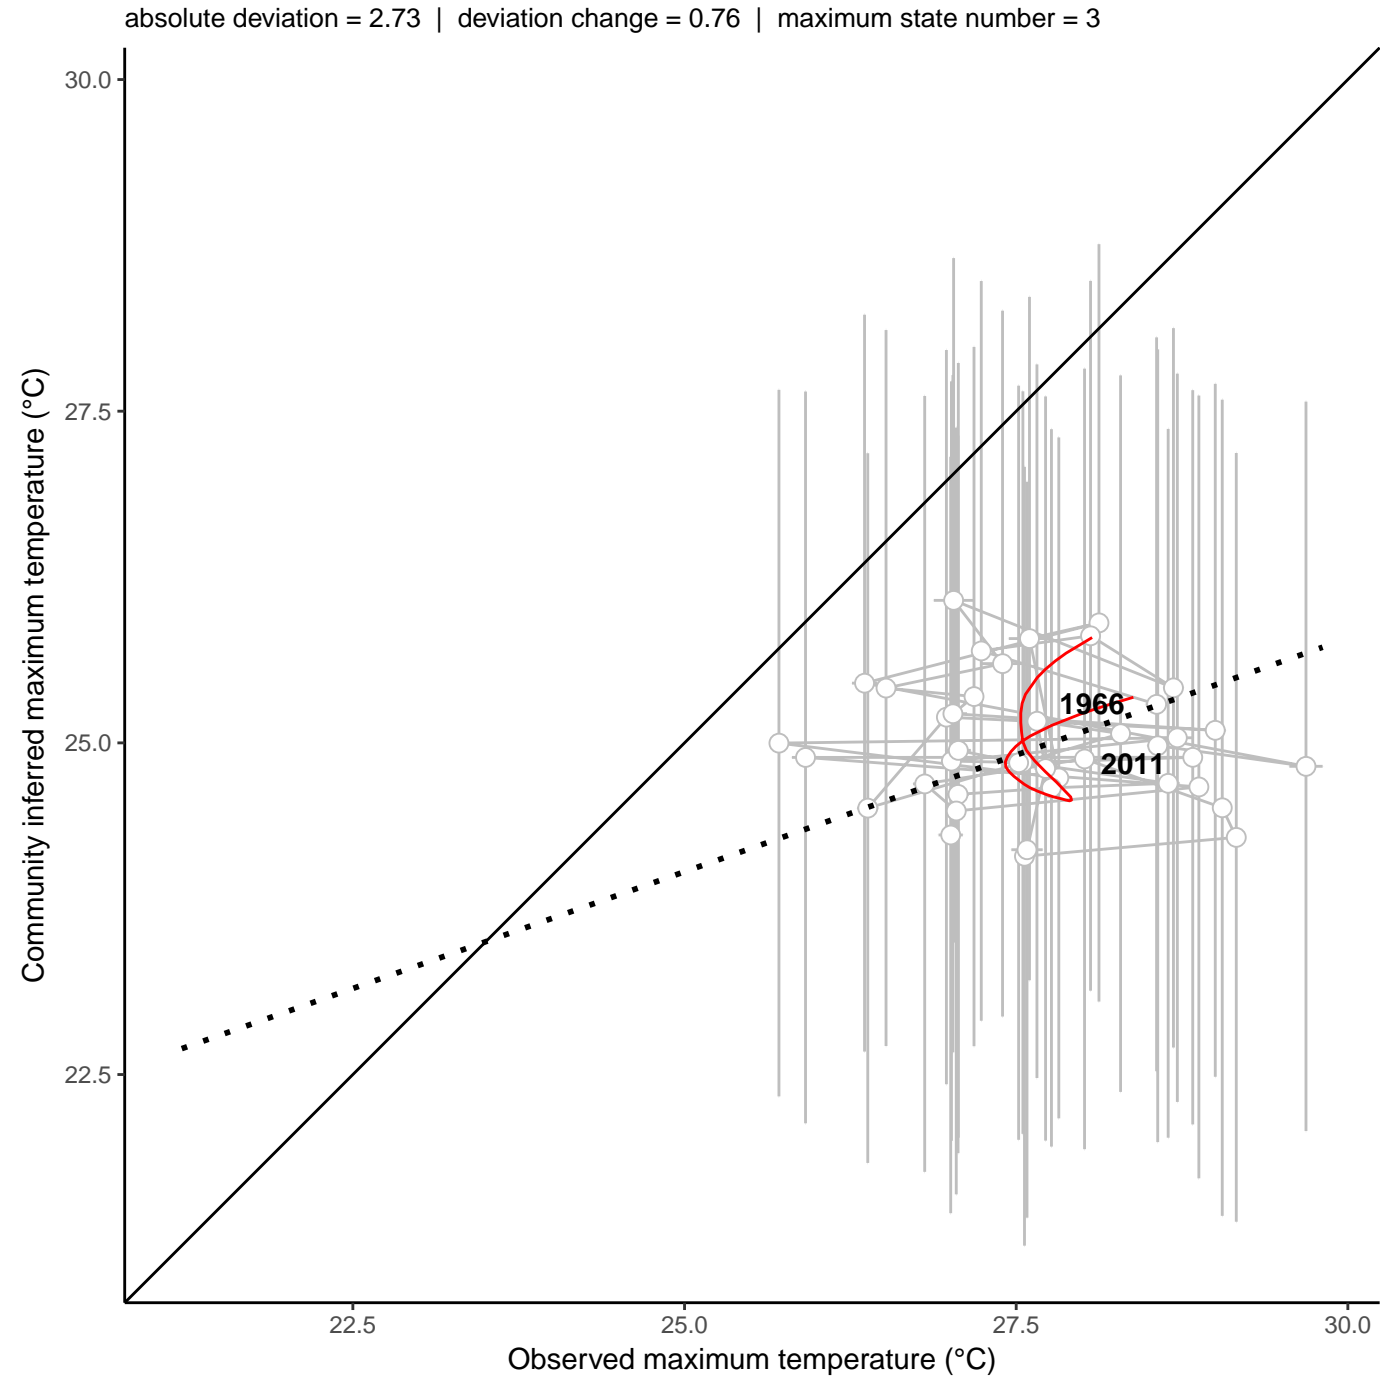

site : 840\_91\_20

absolute deviation = 0.47 | deviation change = -0.39 | maximum state number = 1

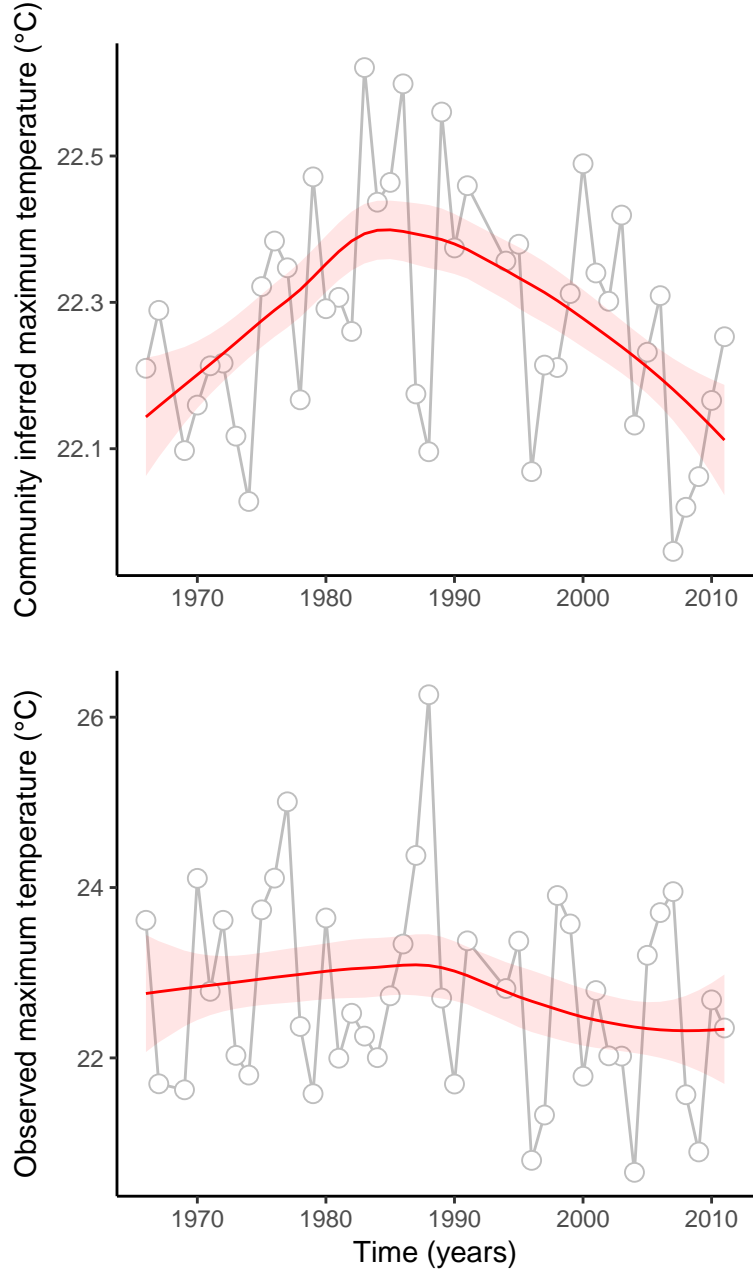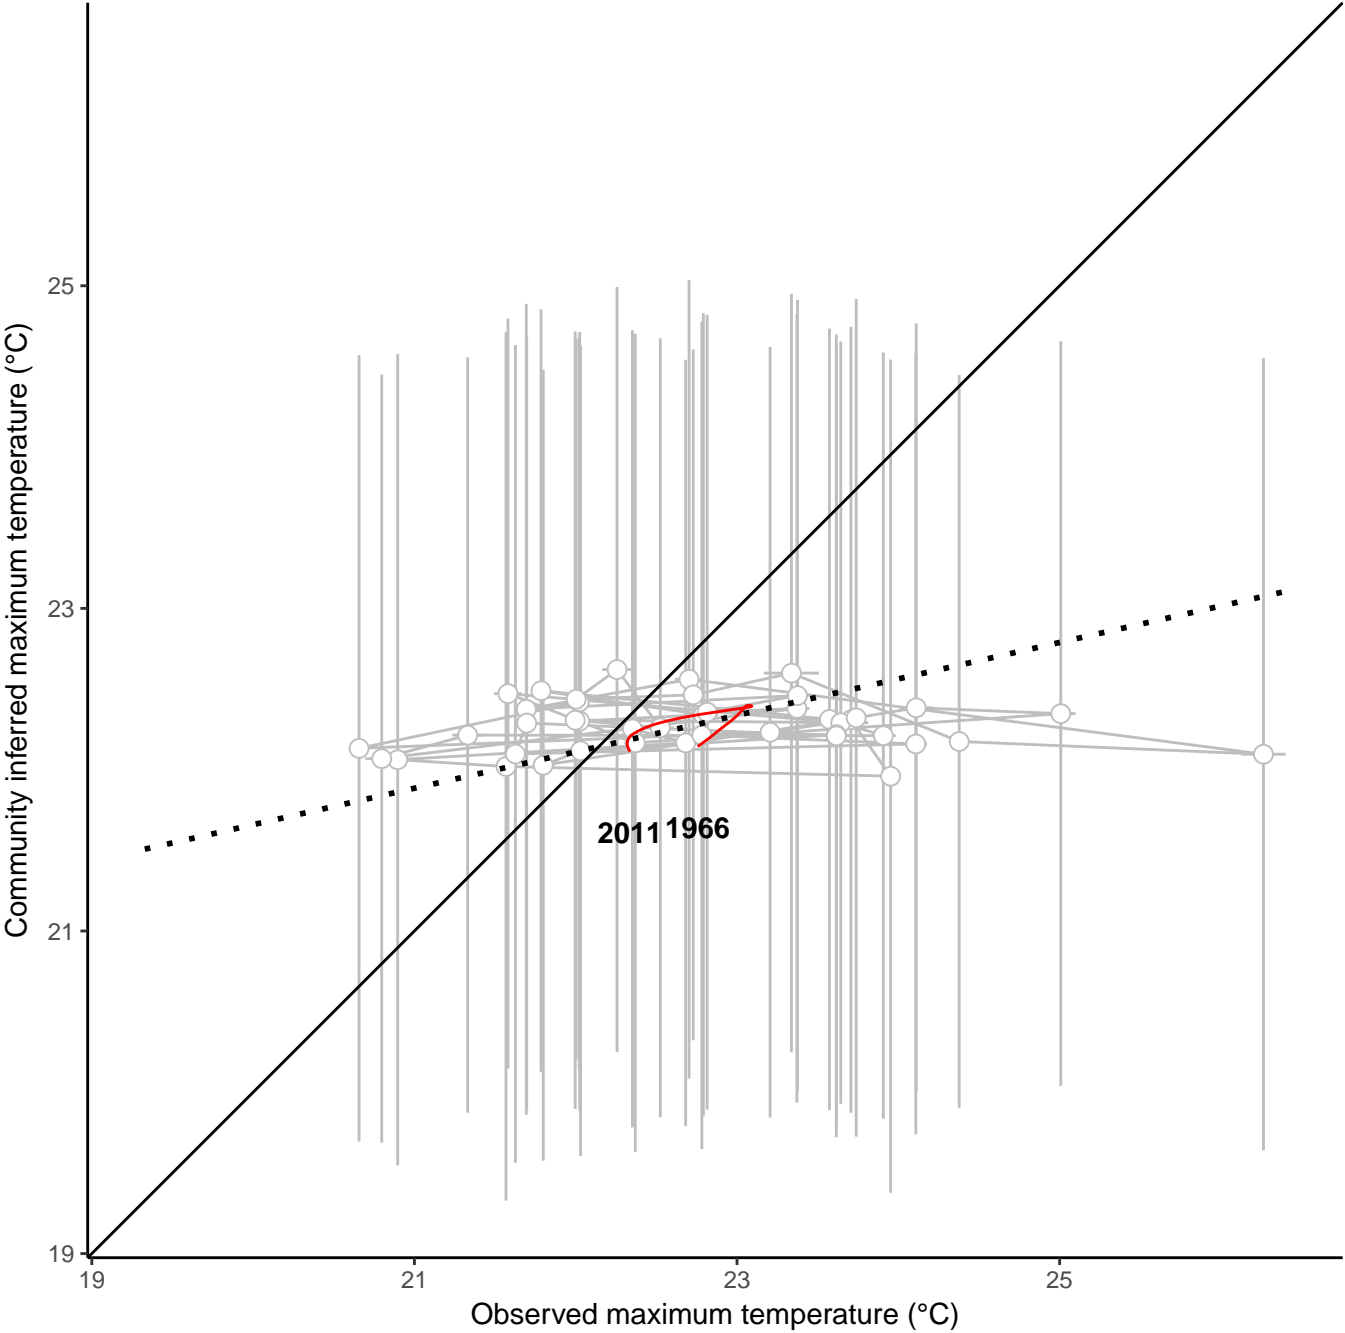

site : 840\_91\_32

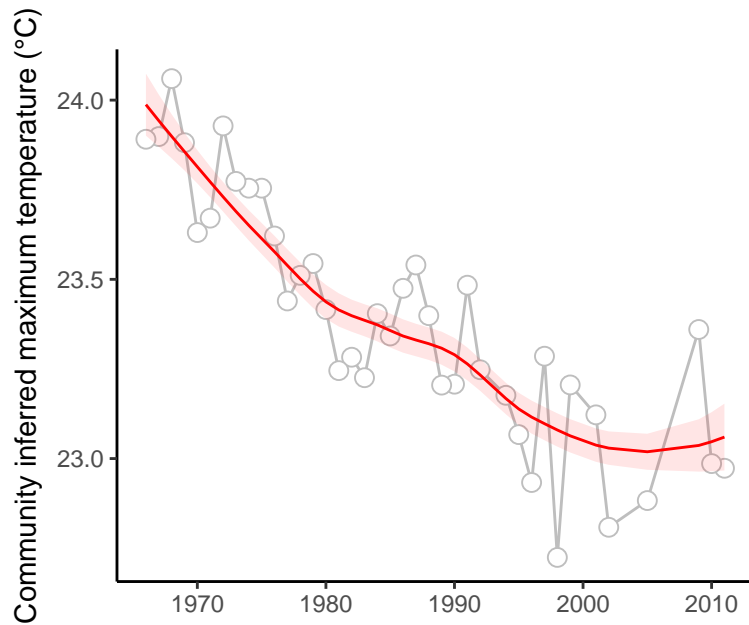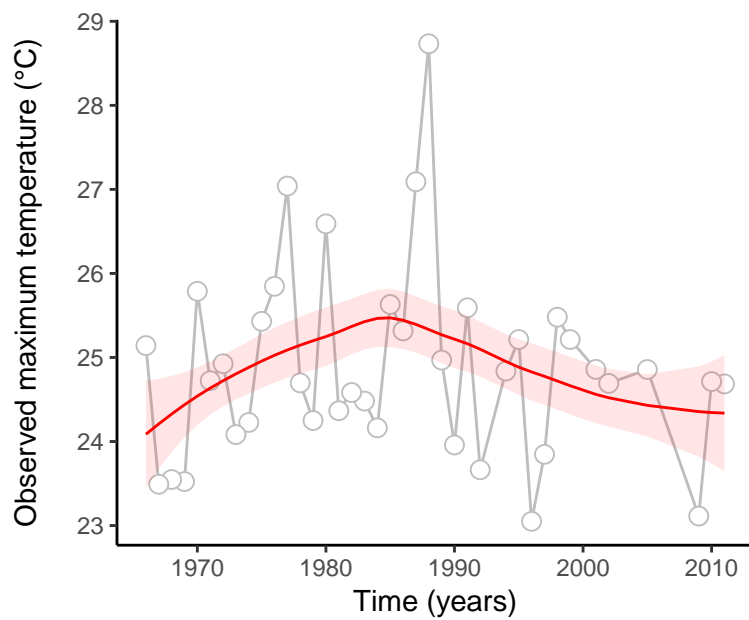

absolute deviation = 1.49 | deviation change = 1.18 | maximum state number = 2

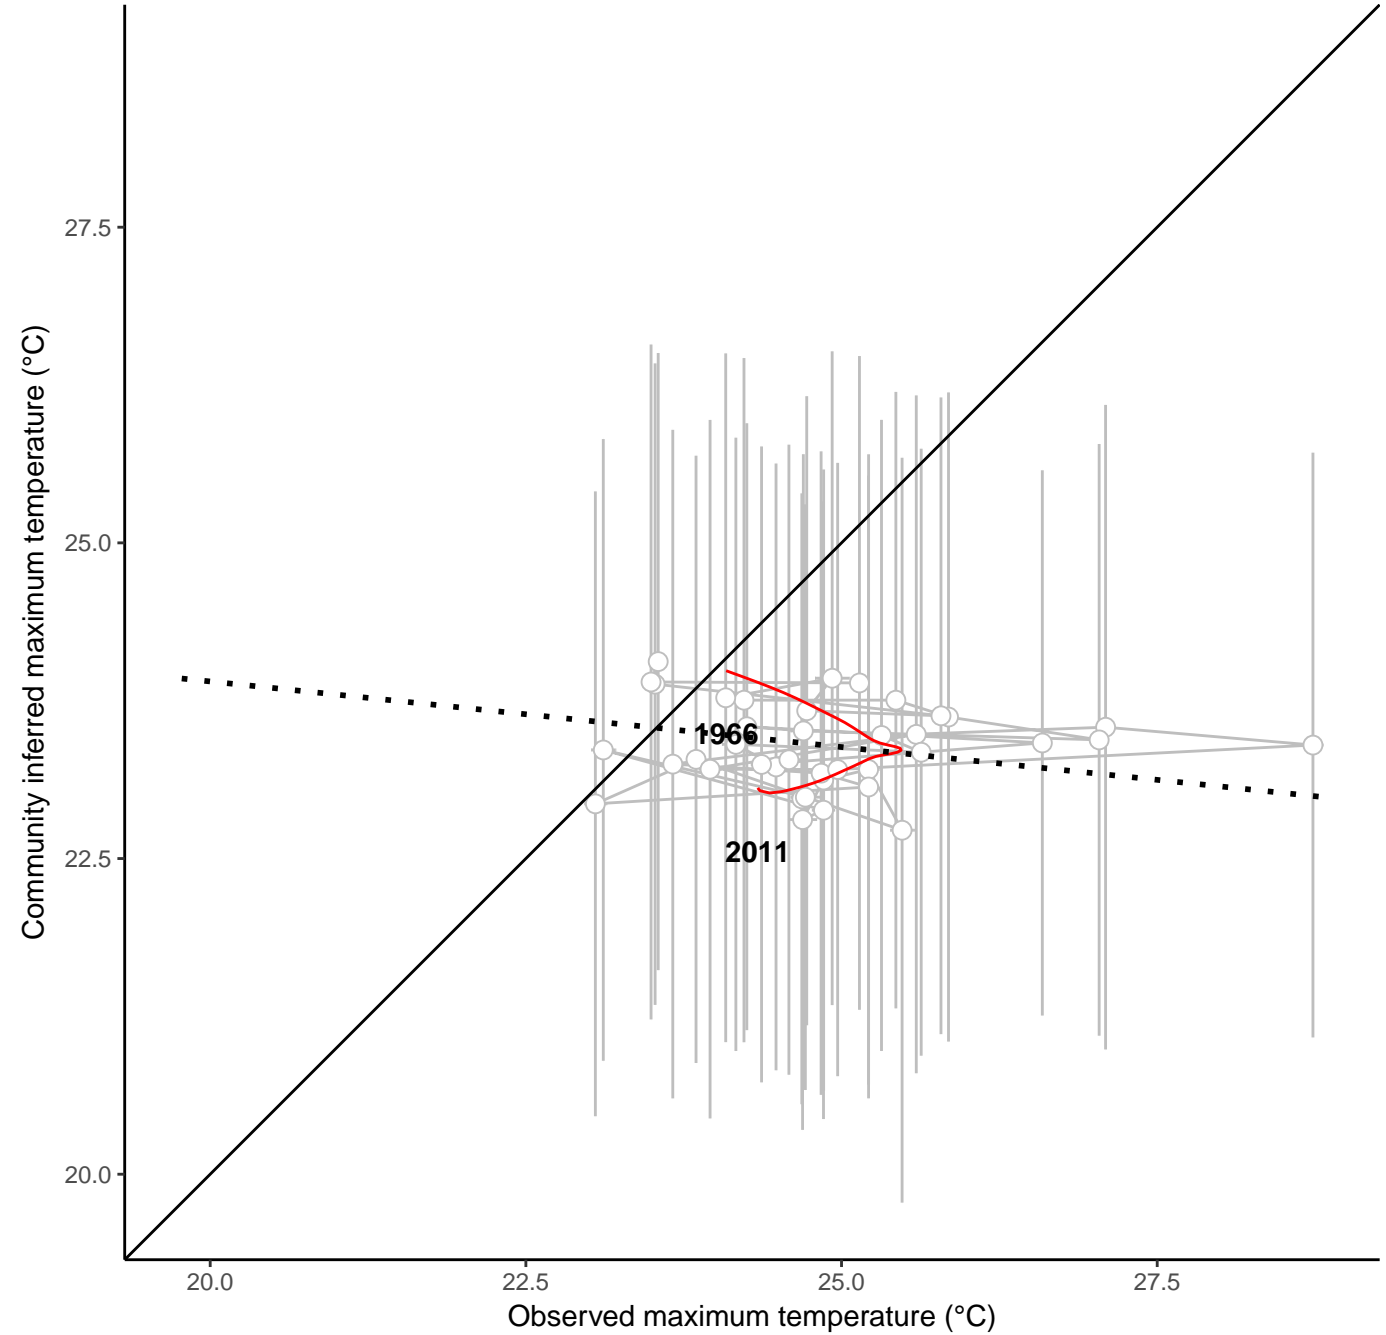

site : 840\_14\_186

absolute deviation = 3.02 | deviation change = -1.73 | maximum state number = 1

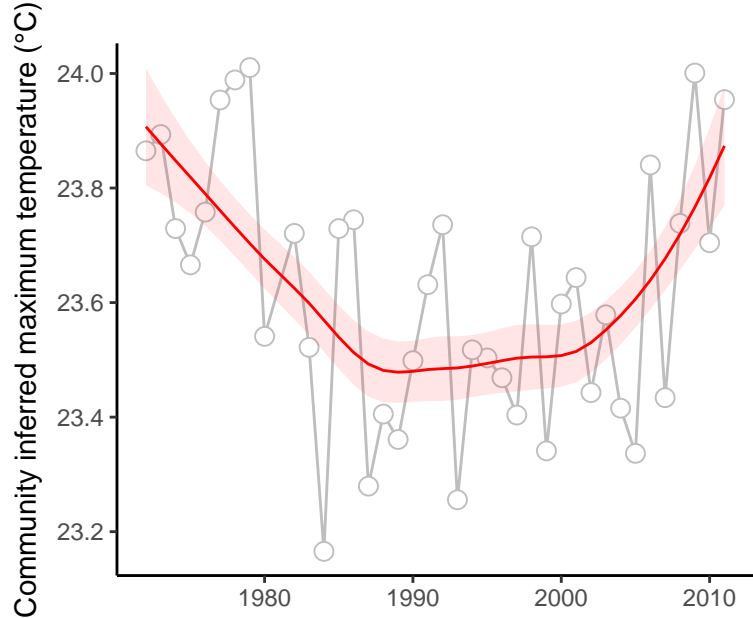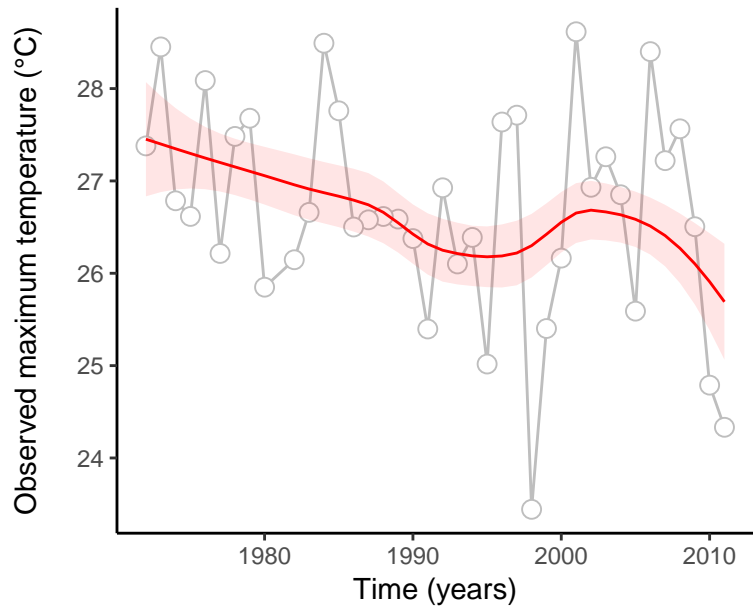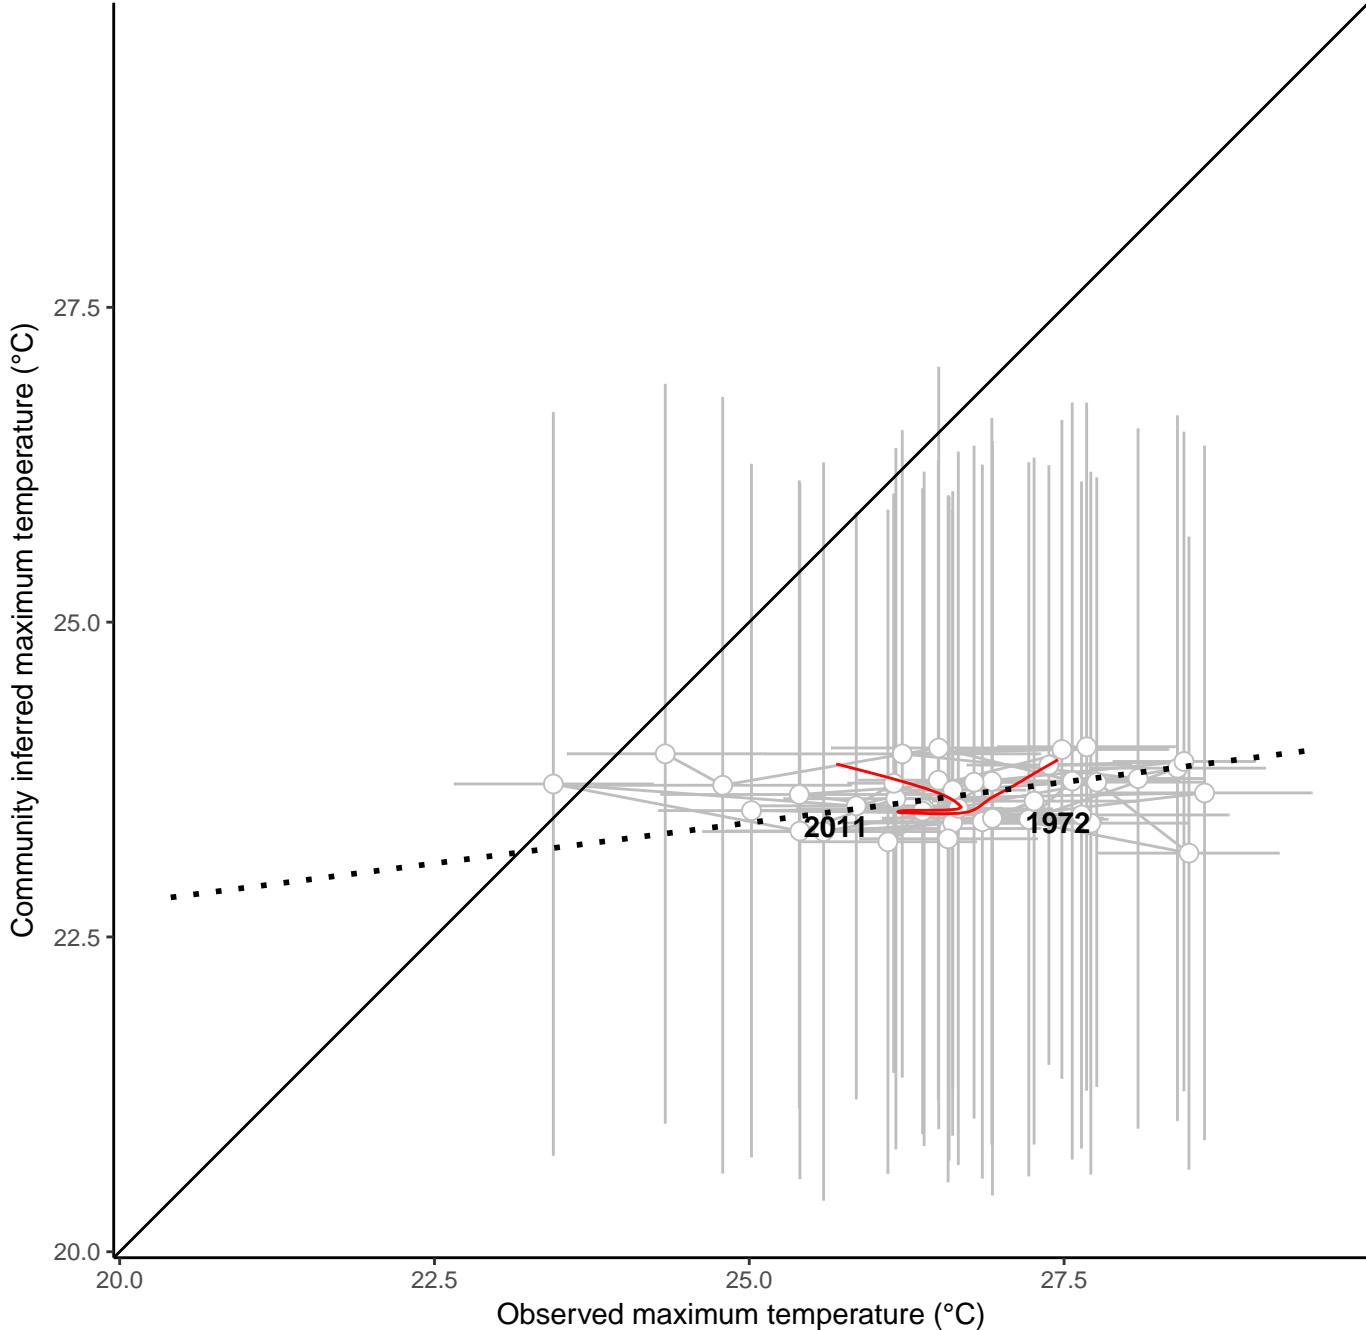

site : 840\_17\_17

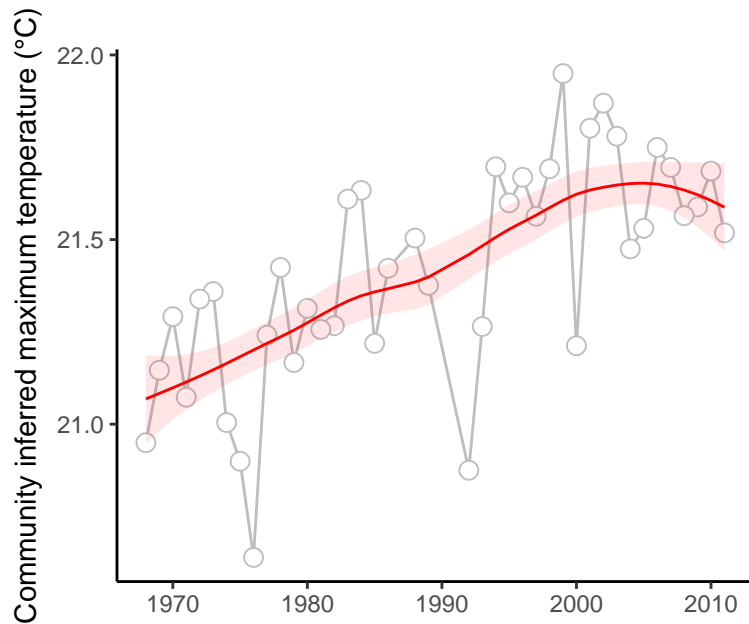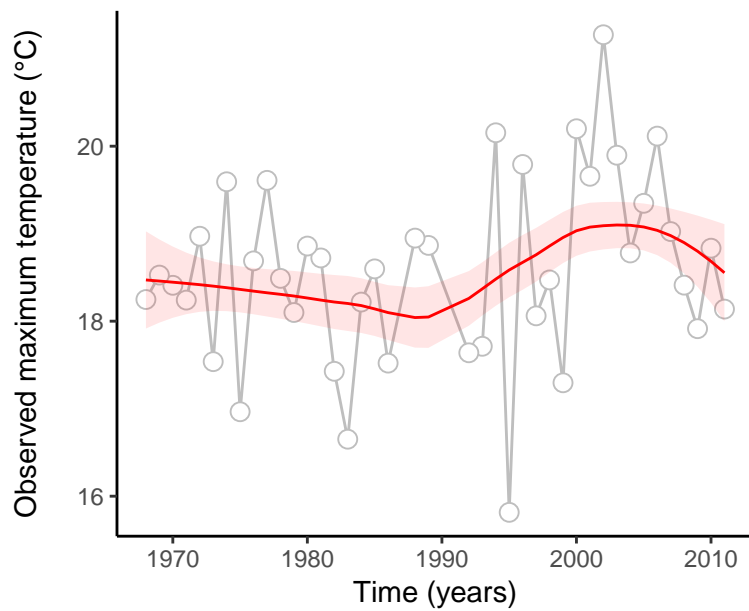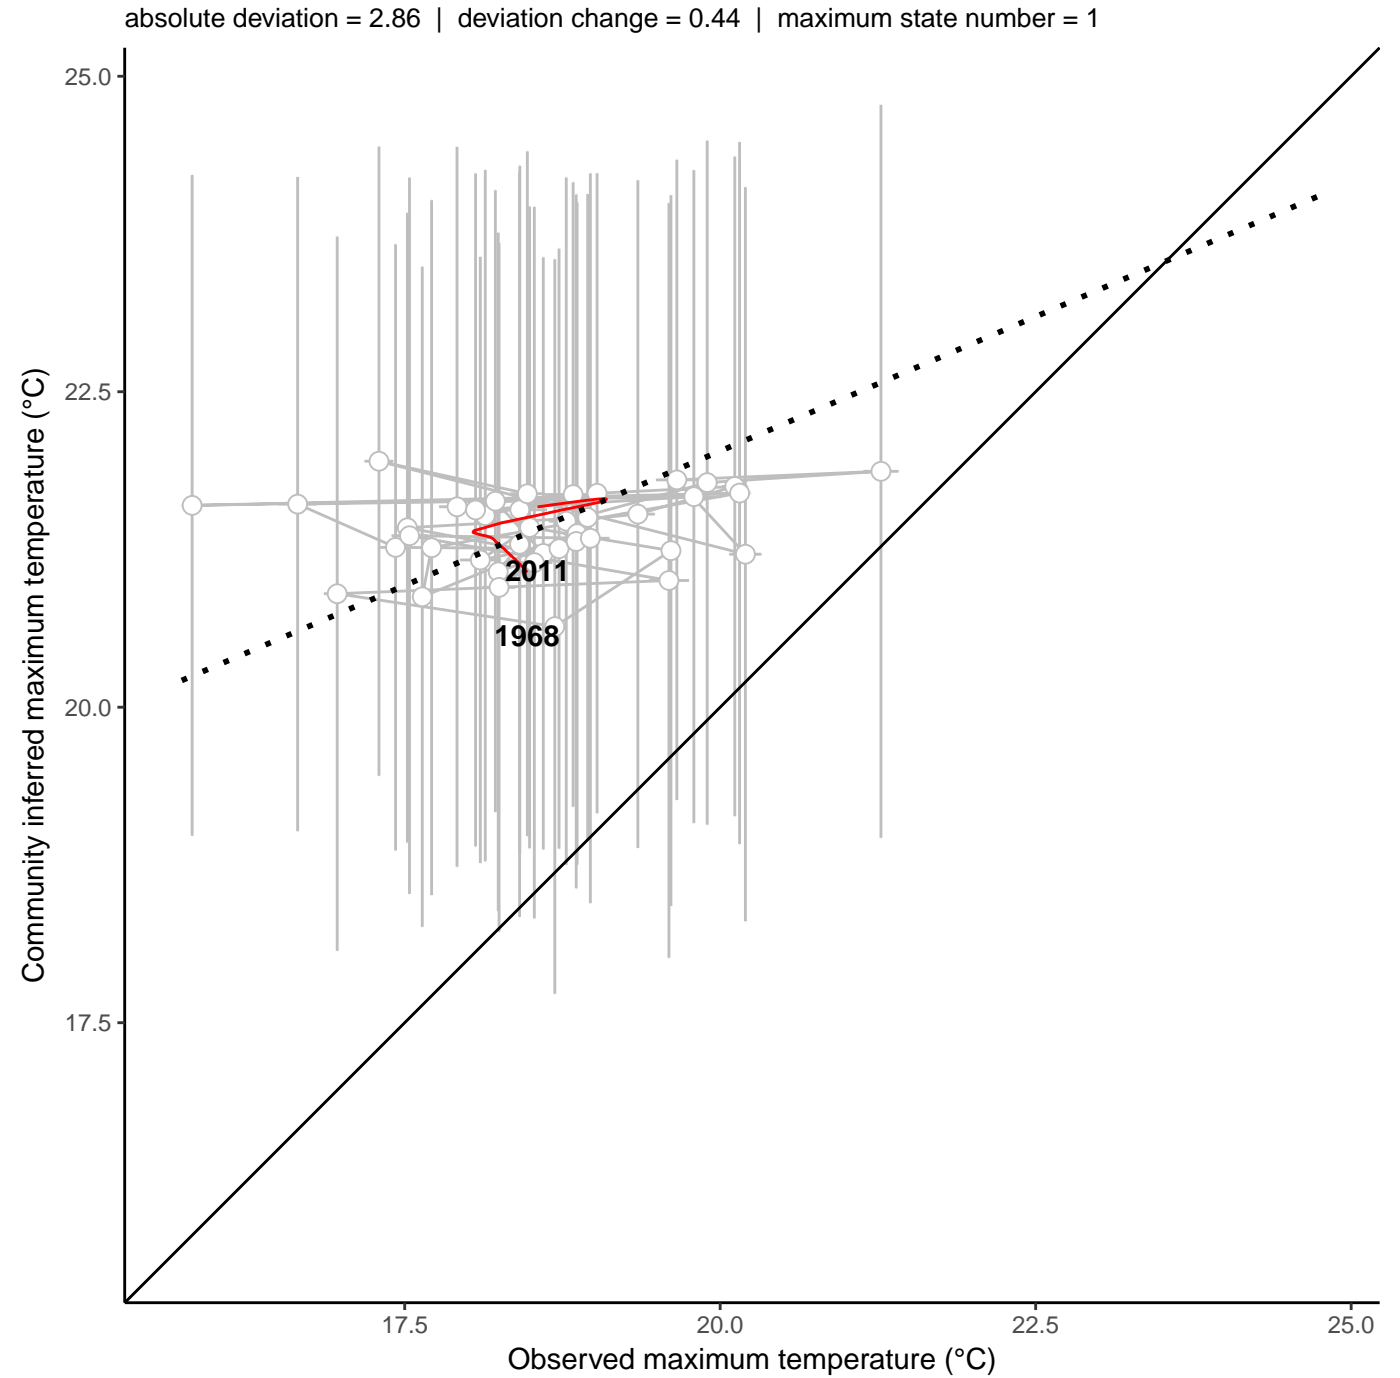

site : 840\_2\_26

absolute deviation = 4.28 | deviation change = 1.1 | maximum state number = 2

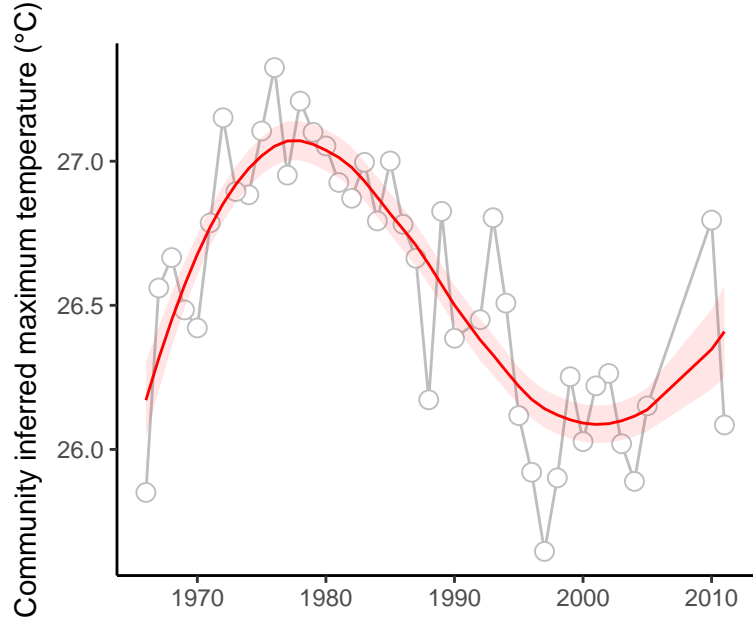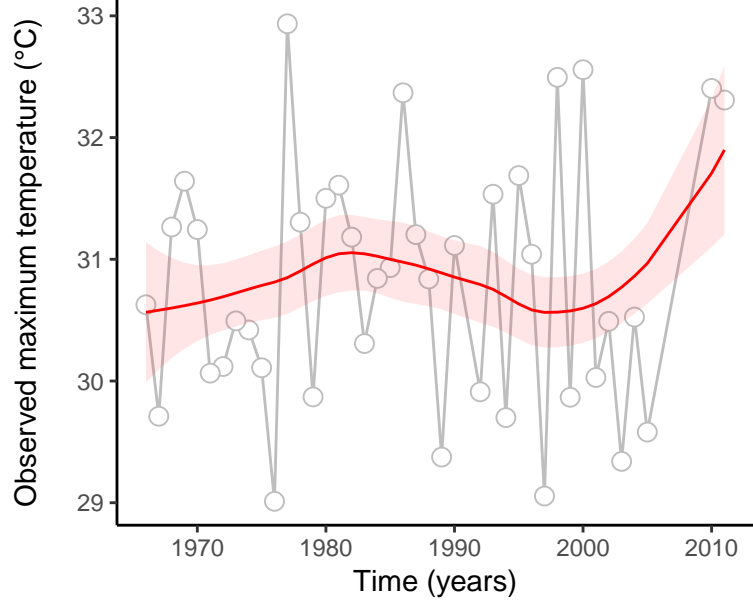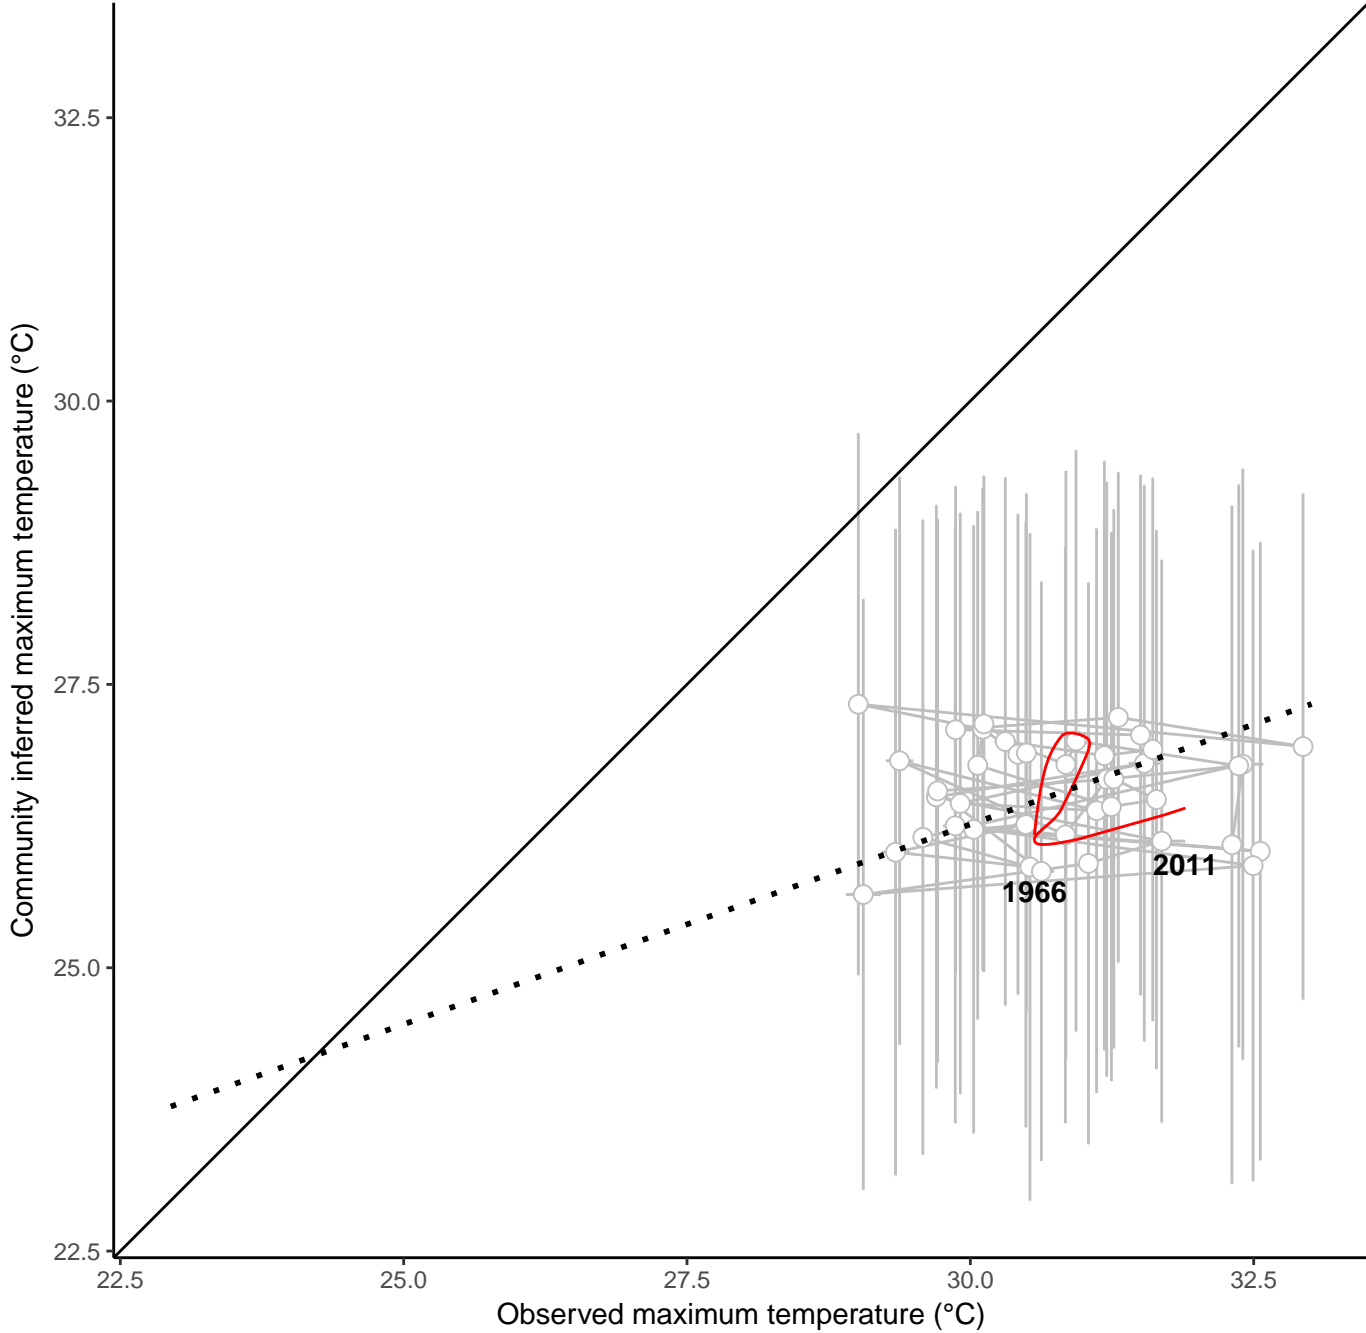

site : 840\_46\_3

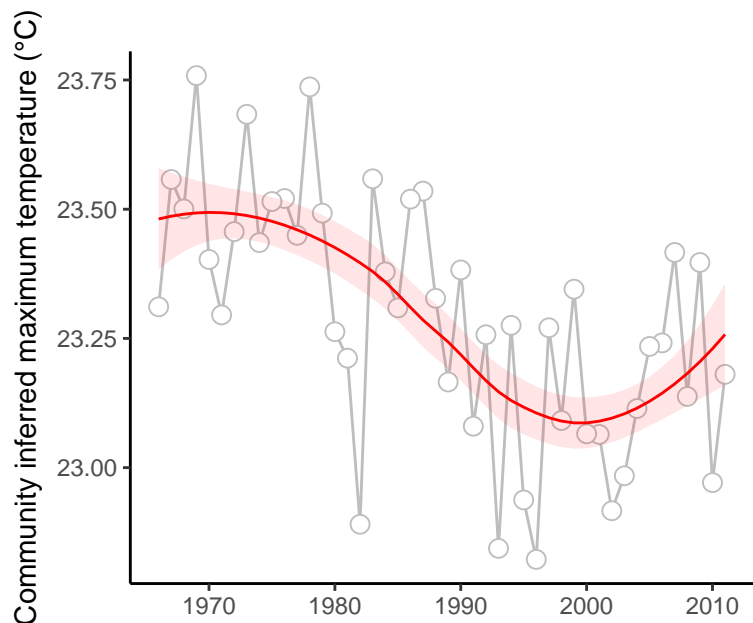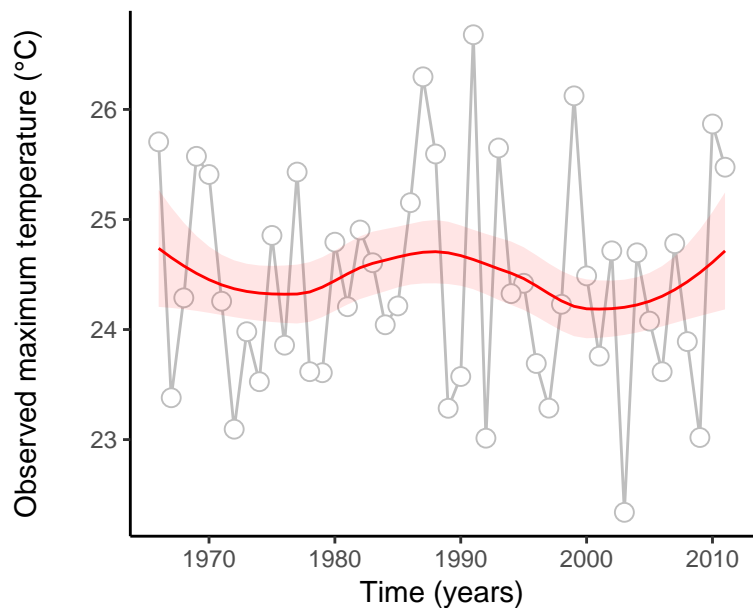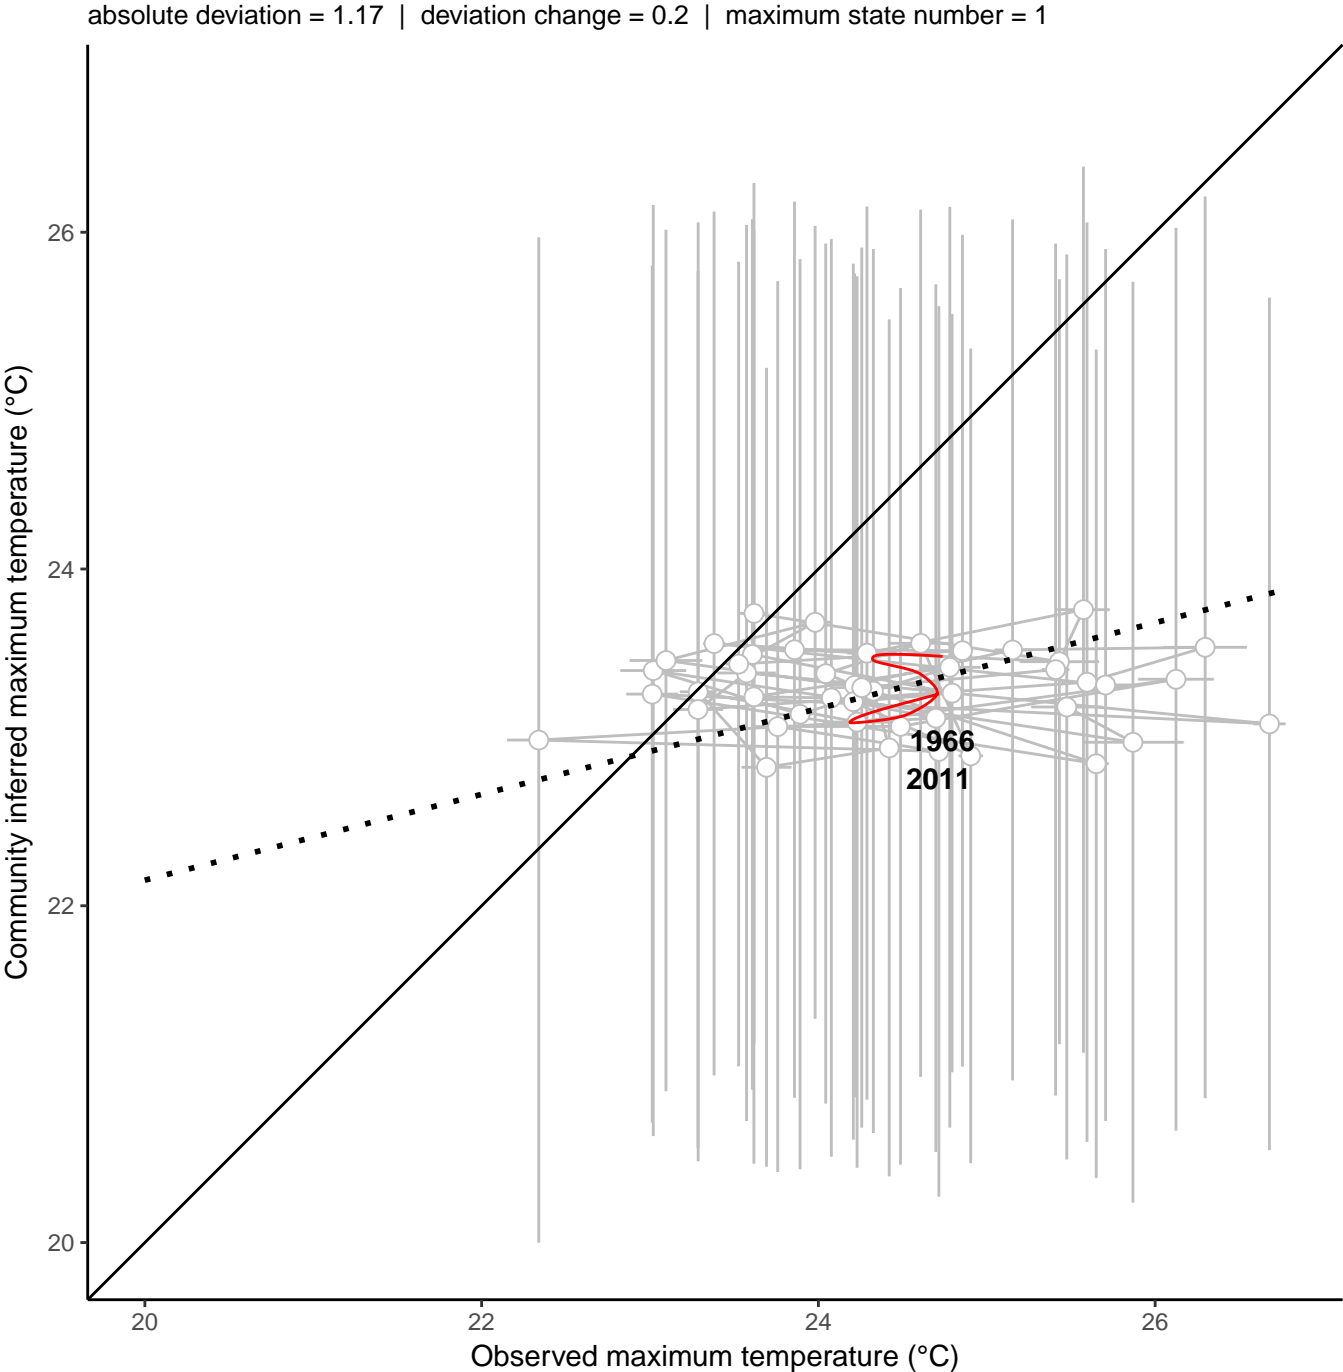



site : 840\_46\_7

absolute deviation = 2.55 | deviation change = 0.01 | maximum state number = 2

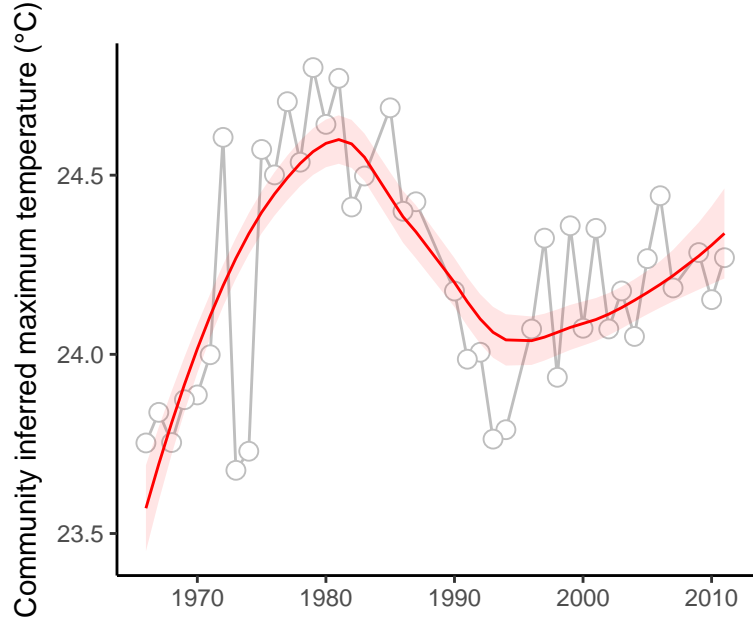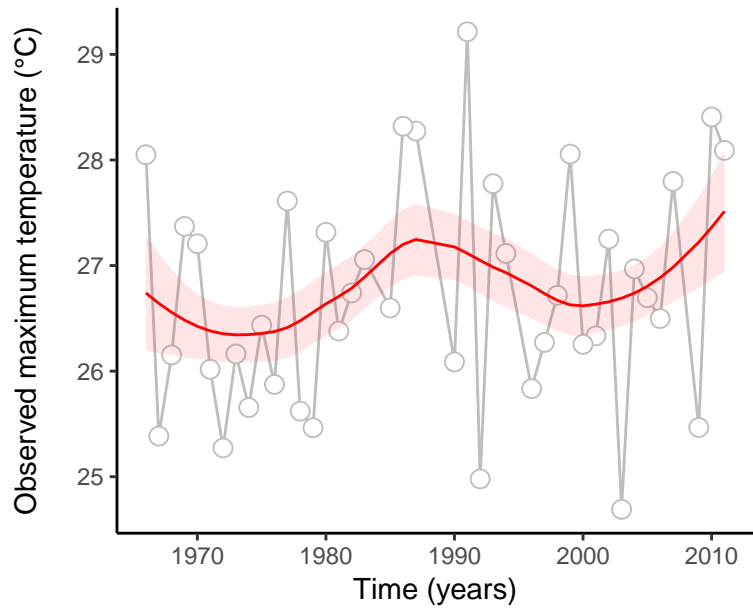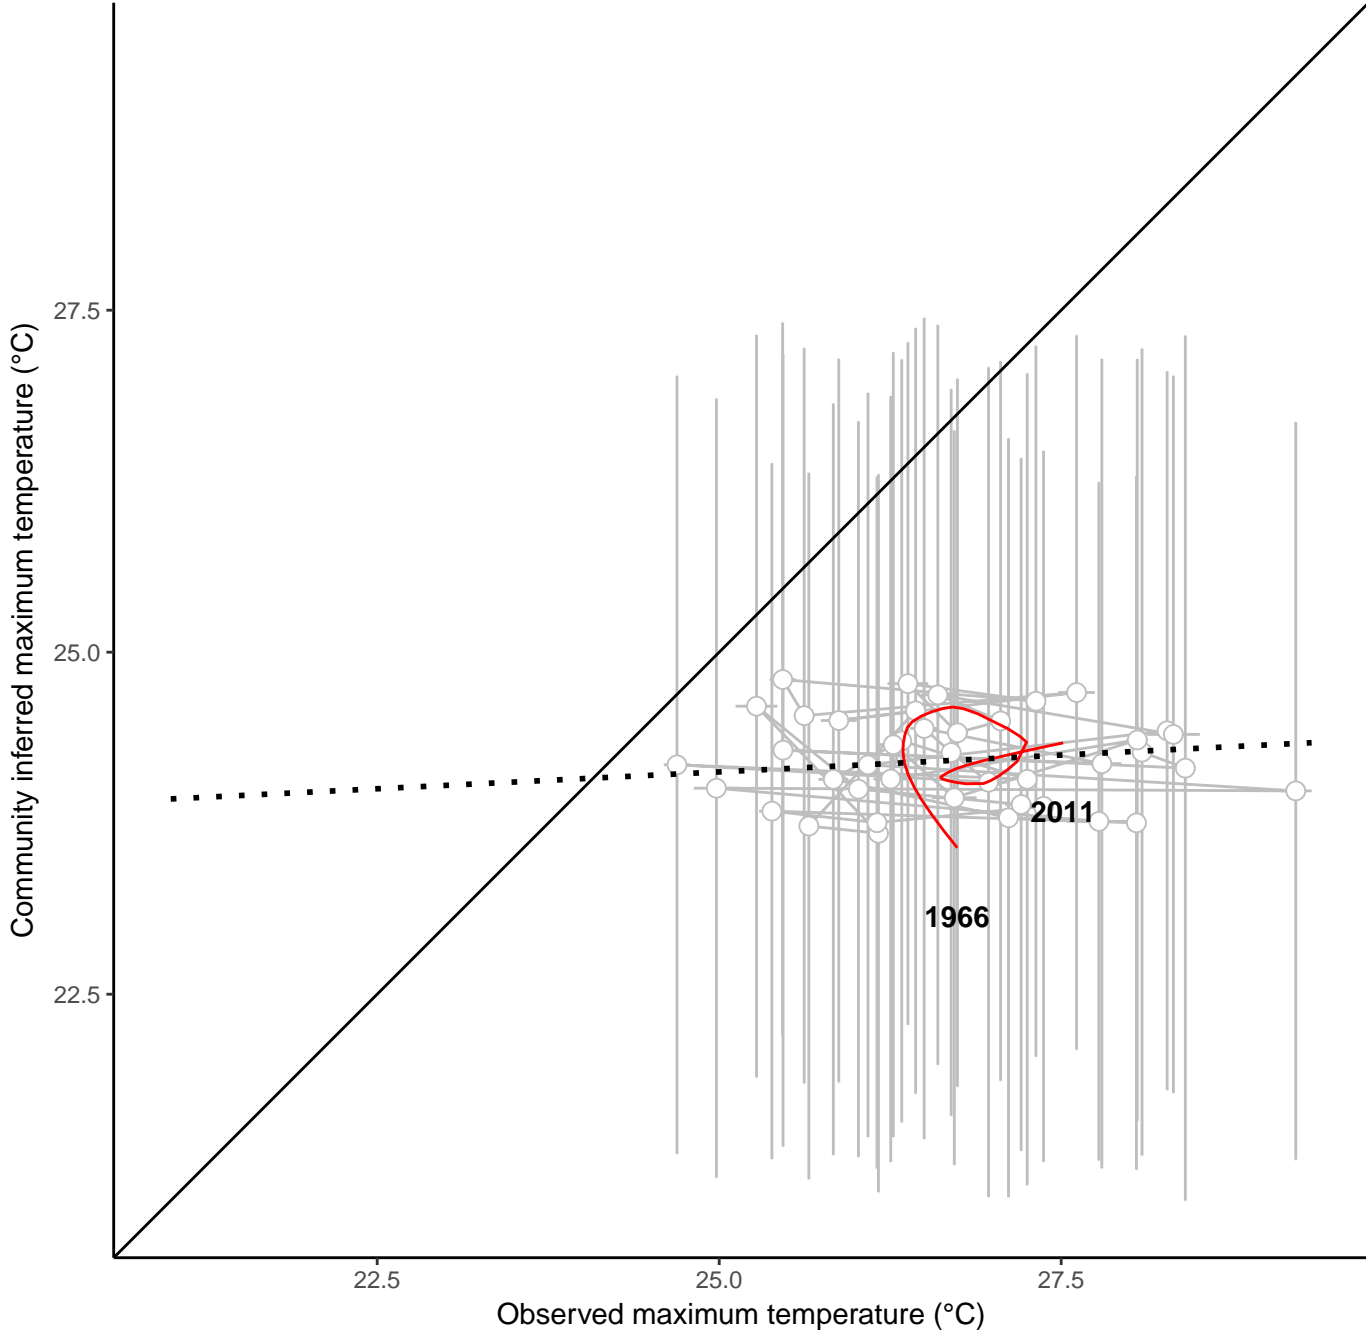

site : 840\_52\_28

absolute deviation = 2.45 | deviation change = 0.97 | maximum state number = 2

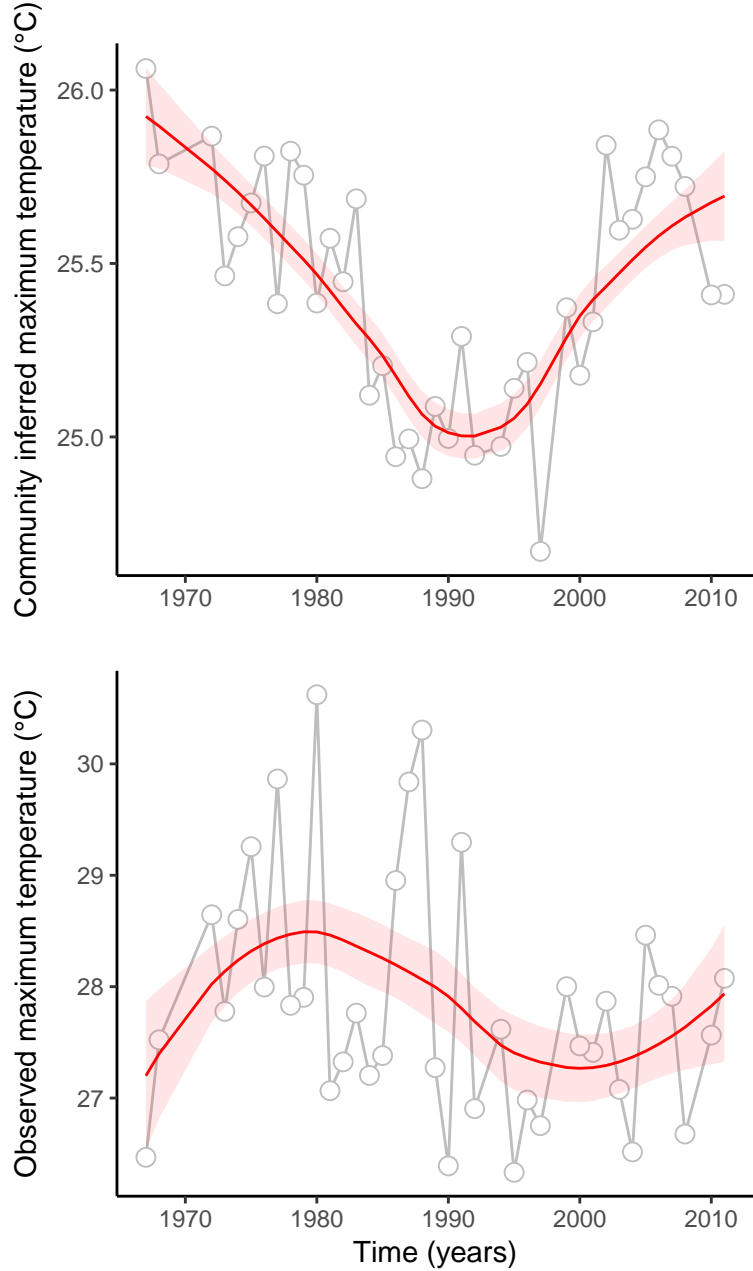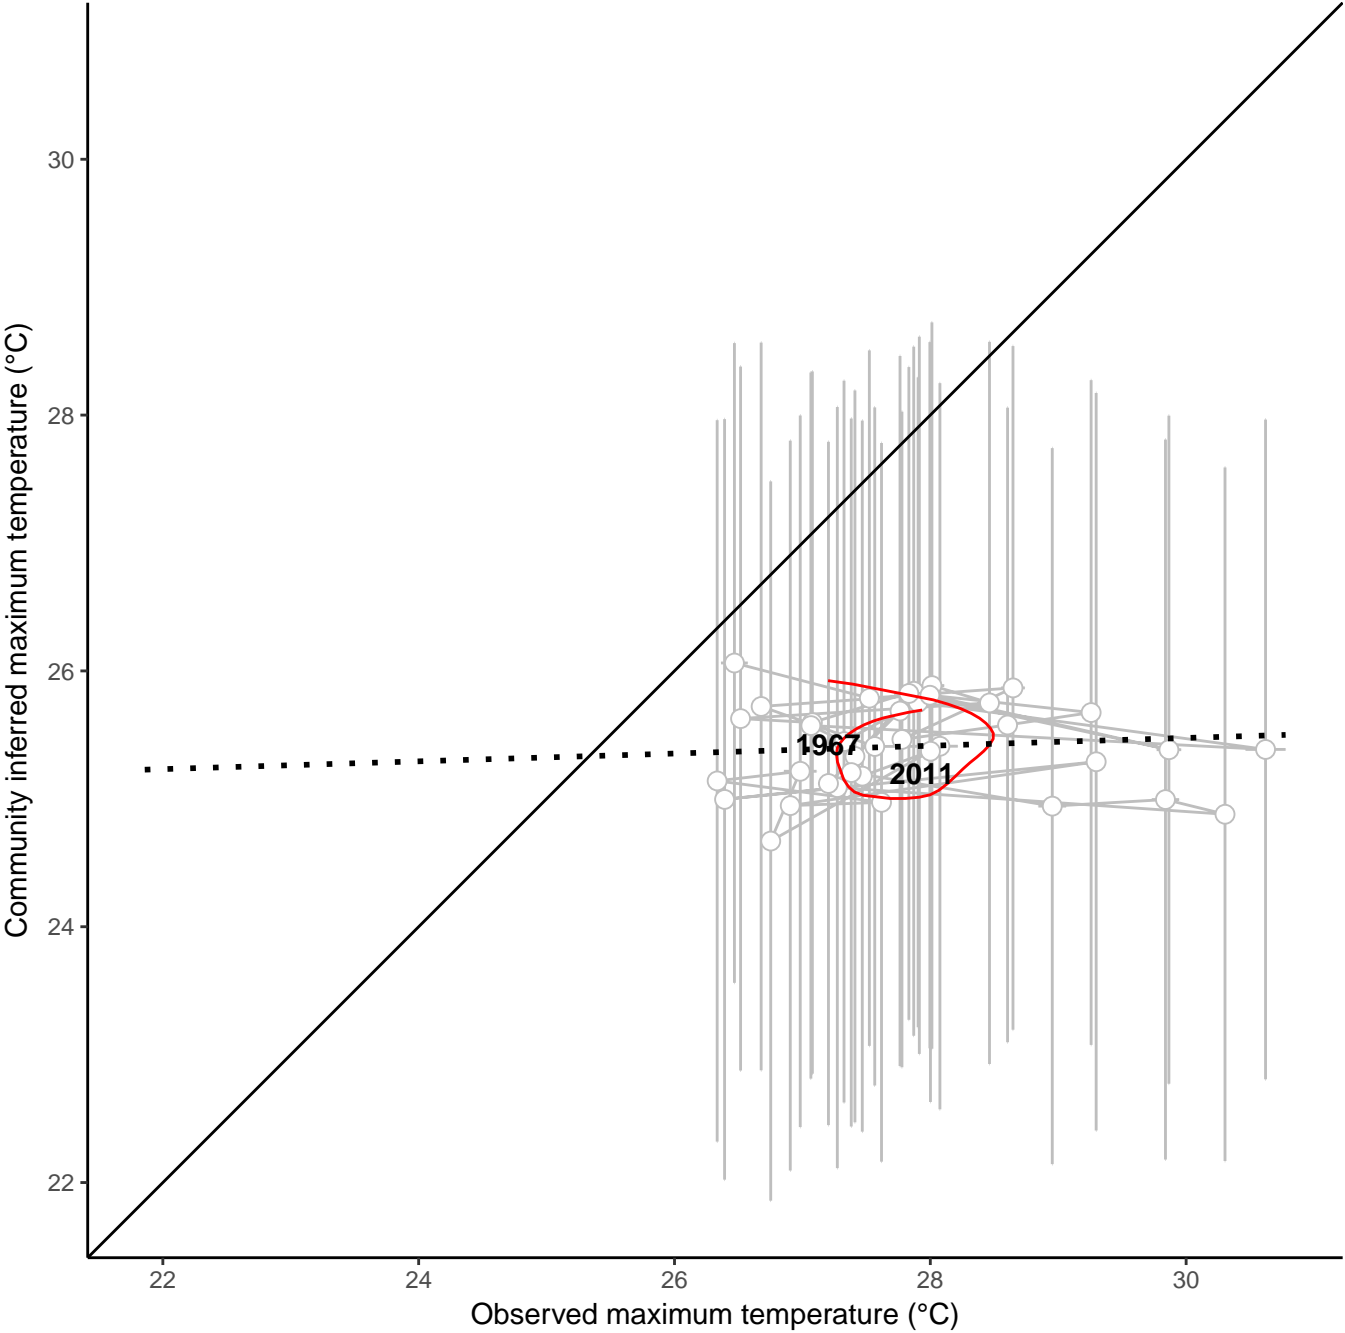

site : 840\_60\_25

absolute deviation = 4.21 | deviation change = 0.35 | maximum state number = 1

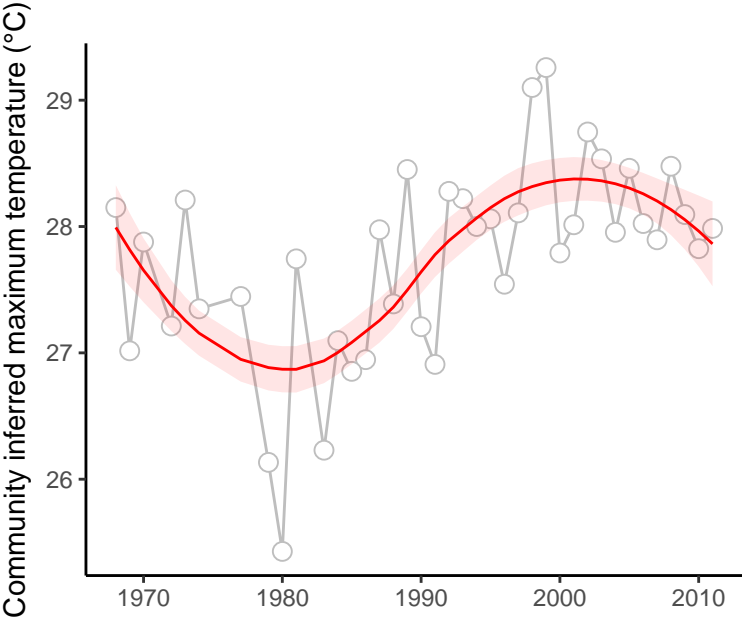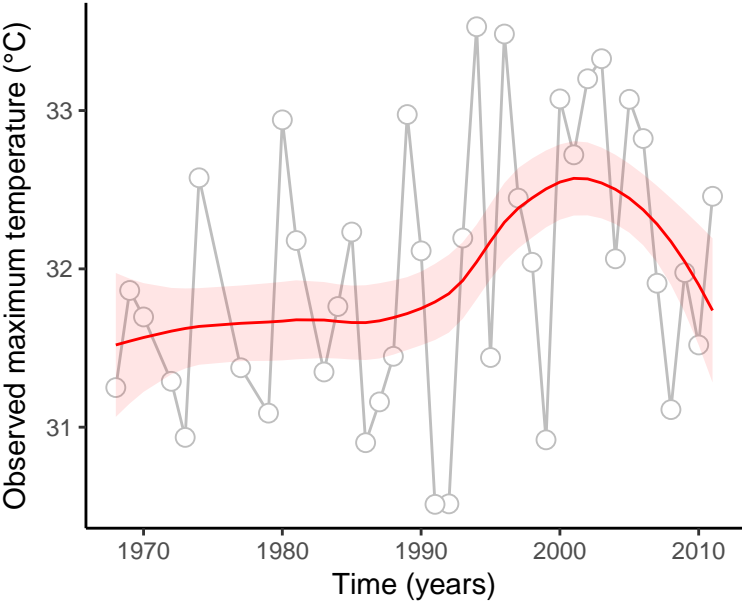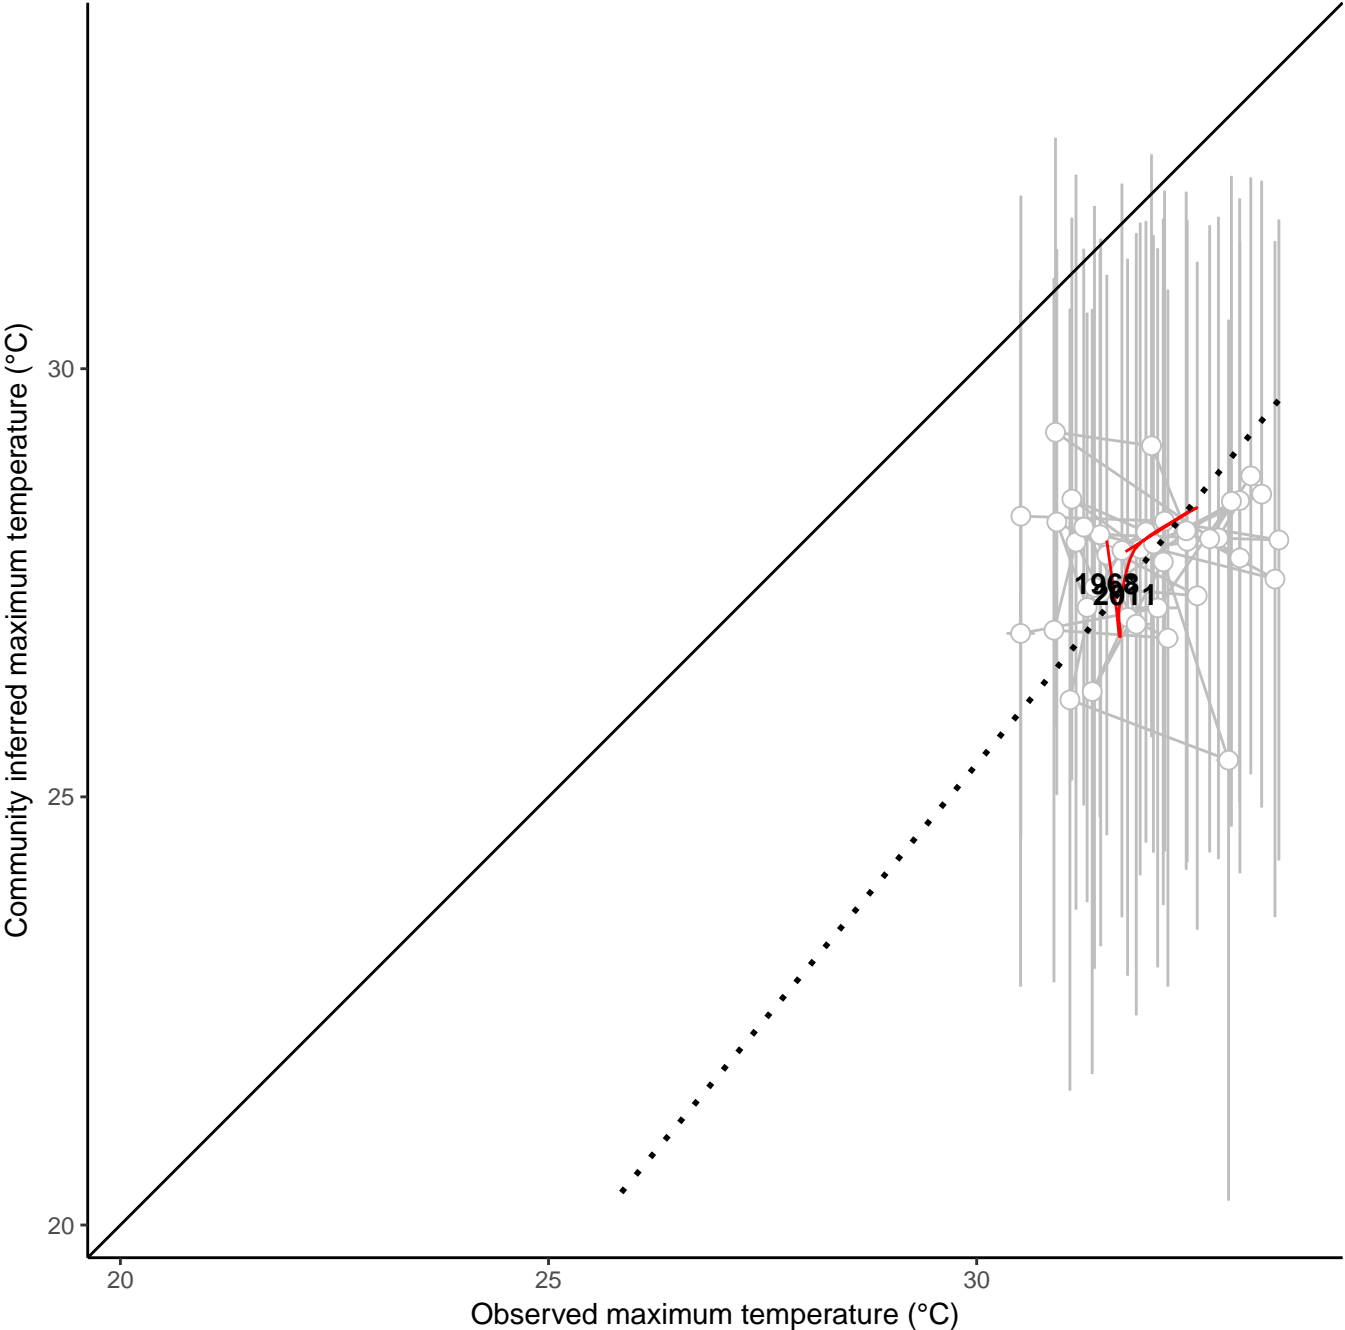

site : 840\_61\_75

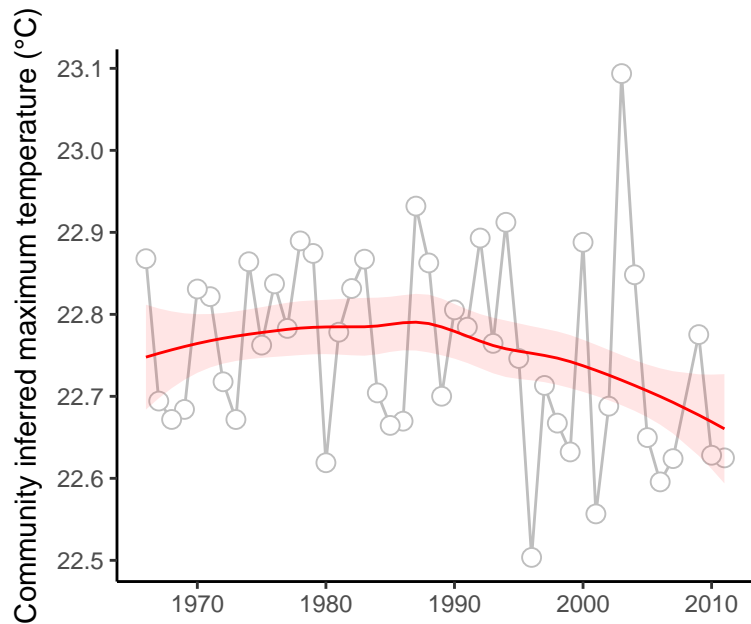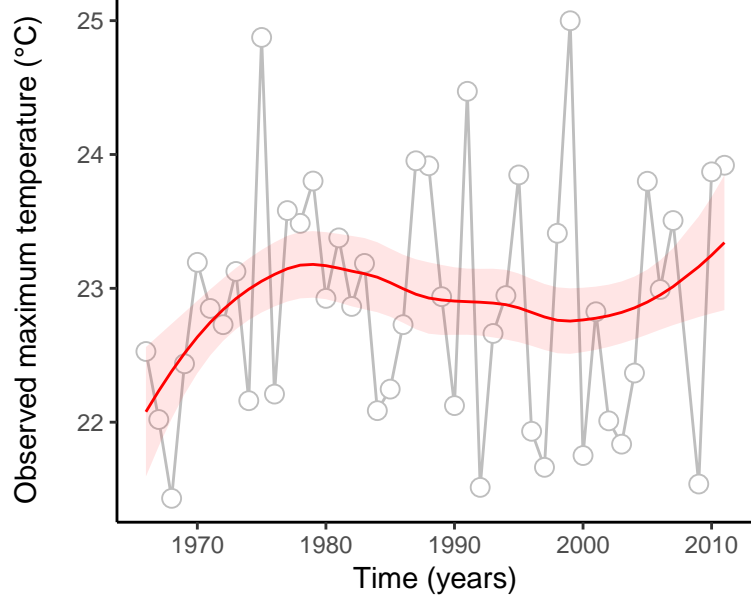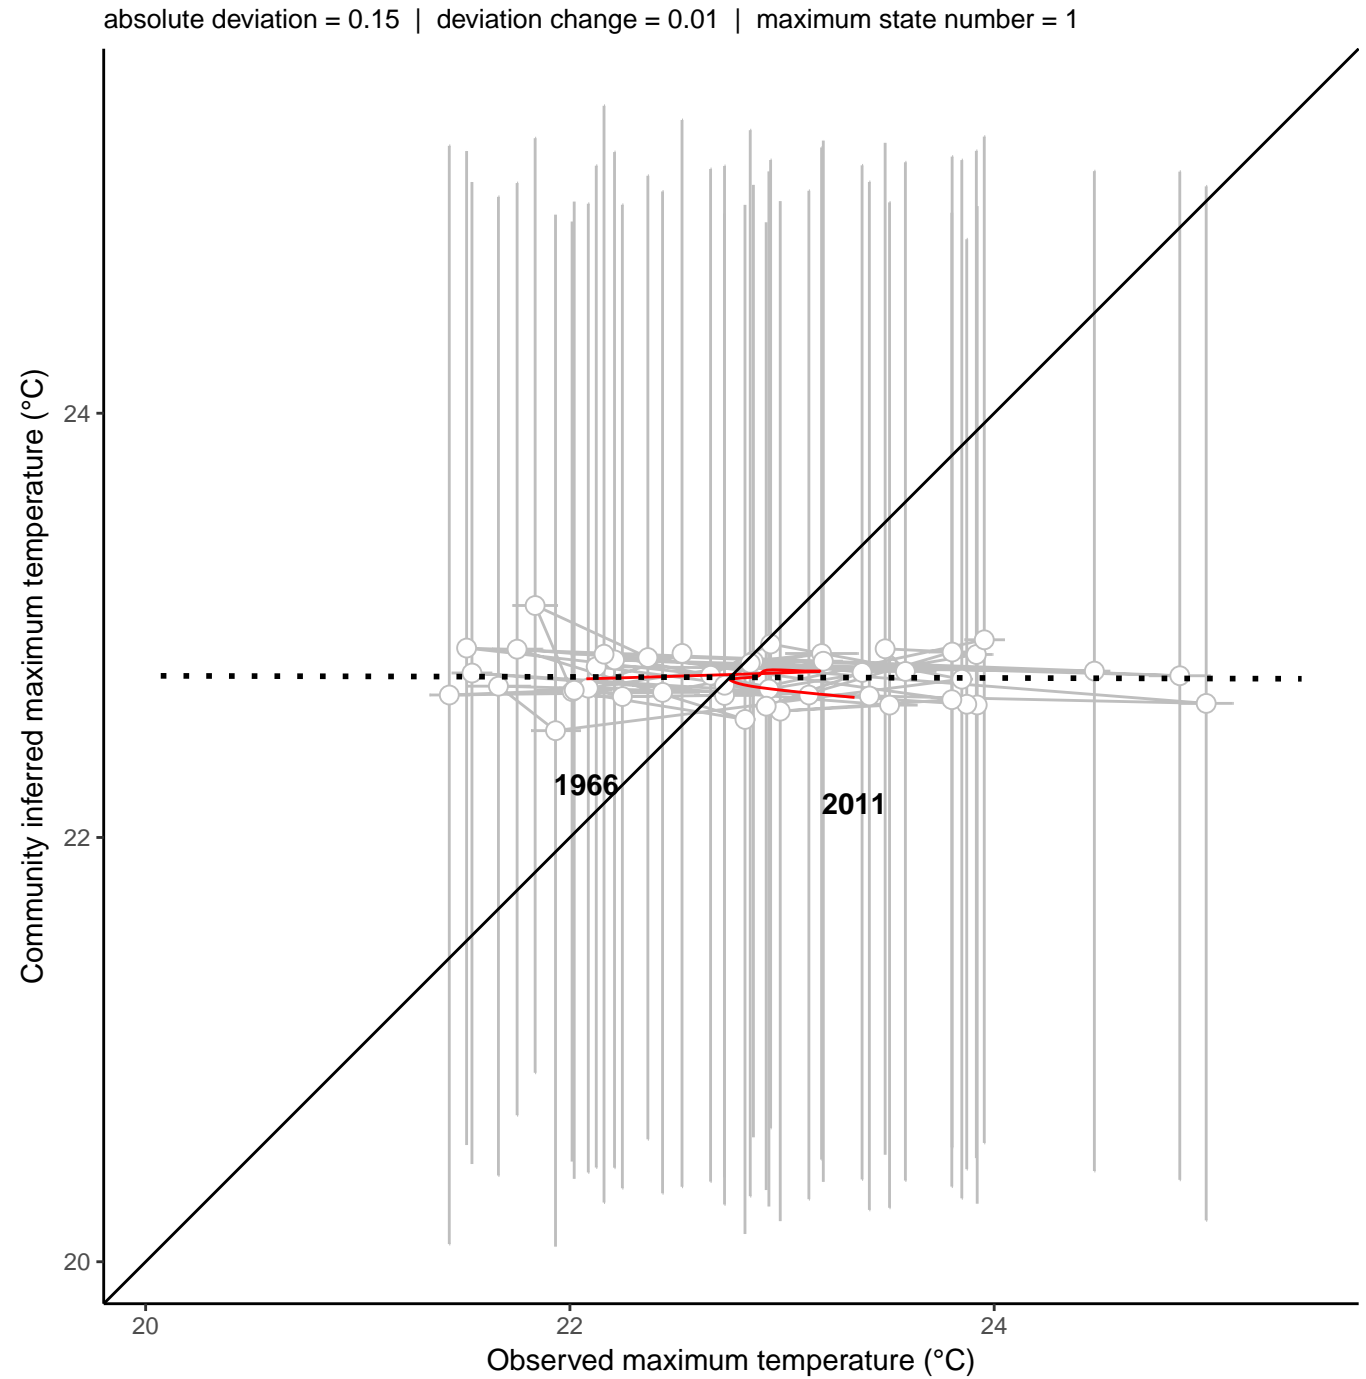

site : 840\_67\_30

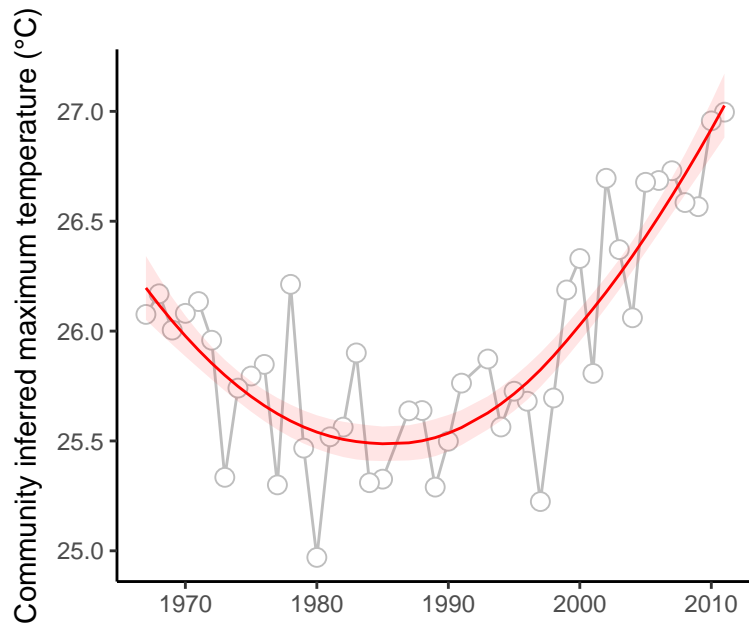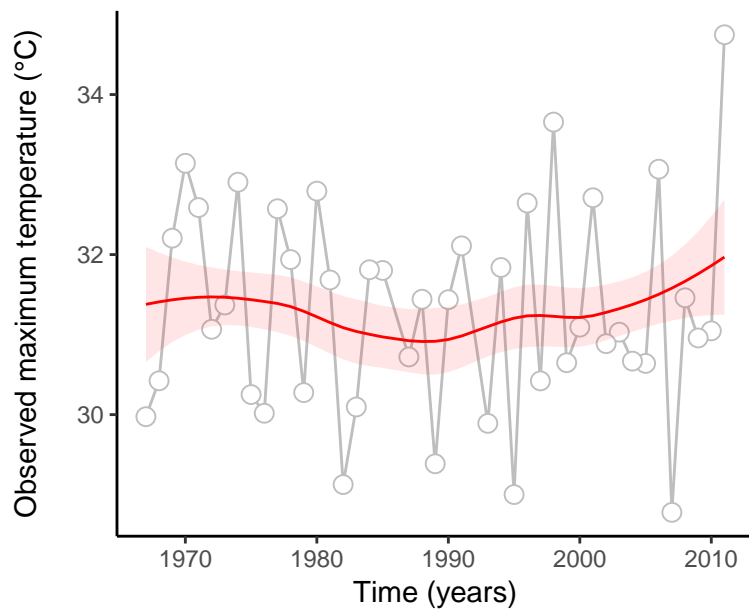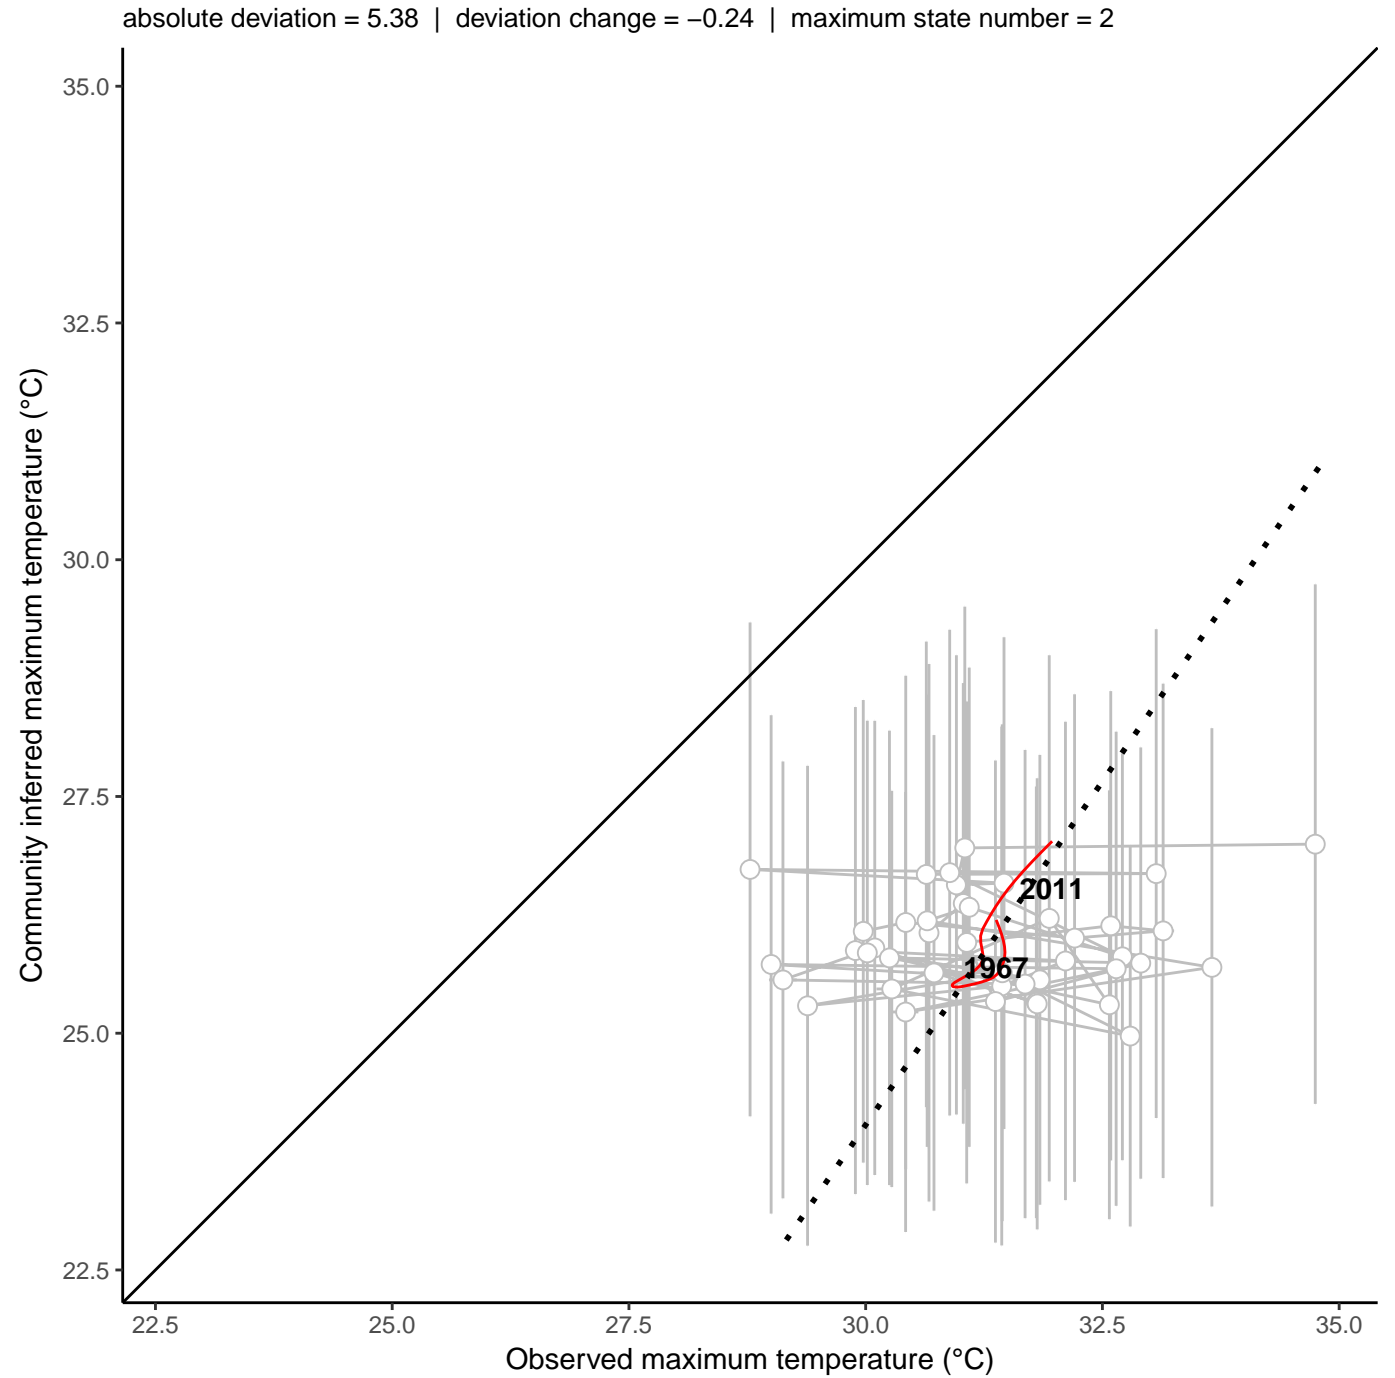

site : 840\_69\_31

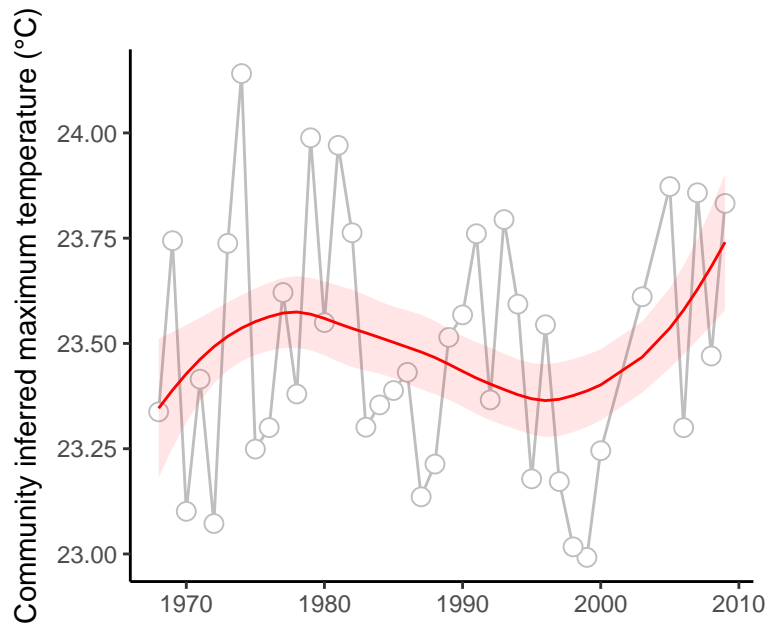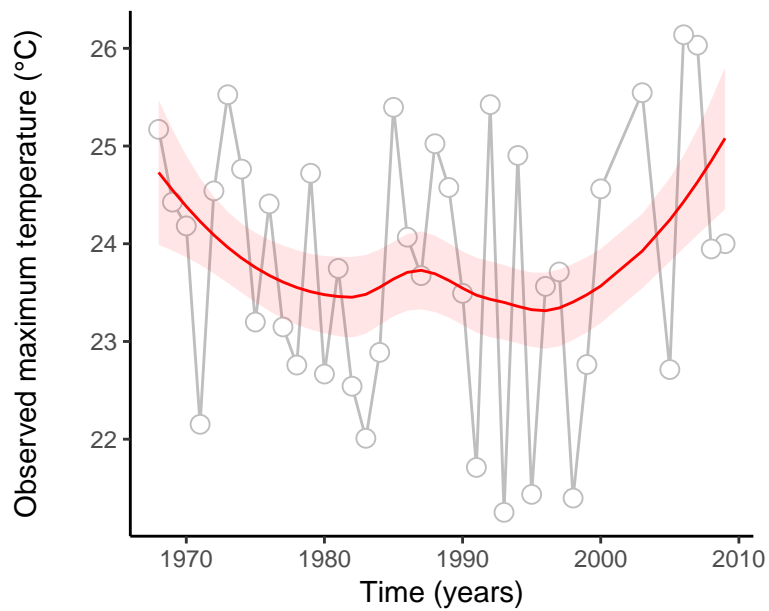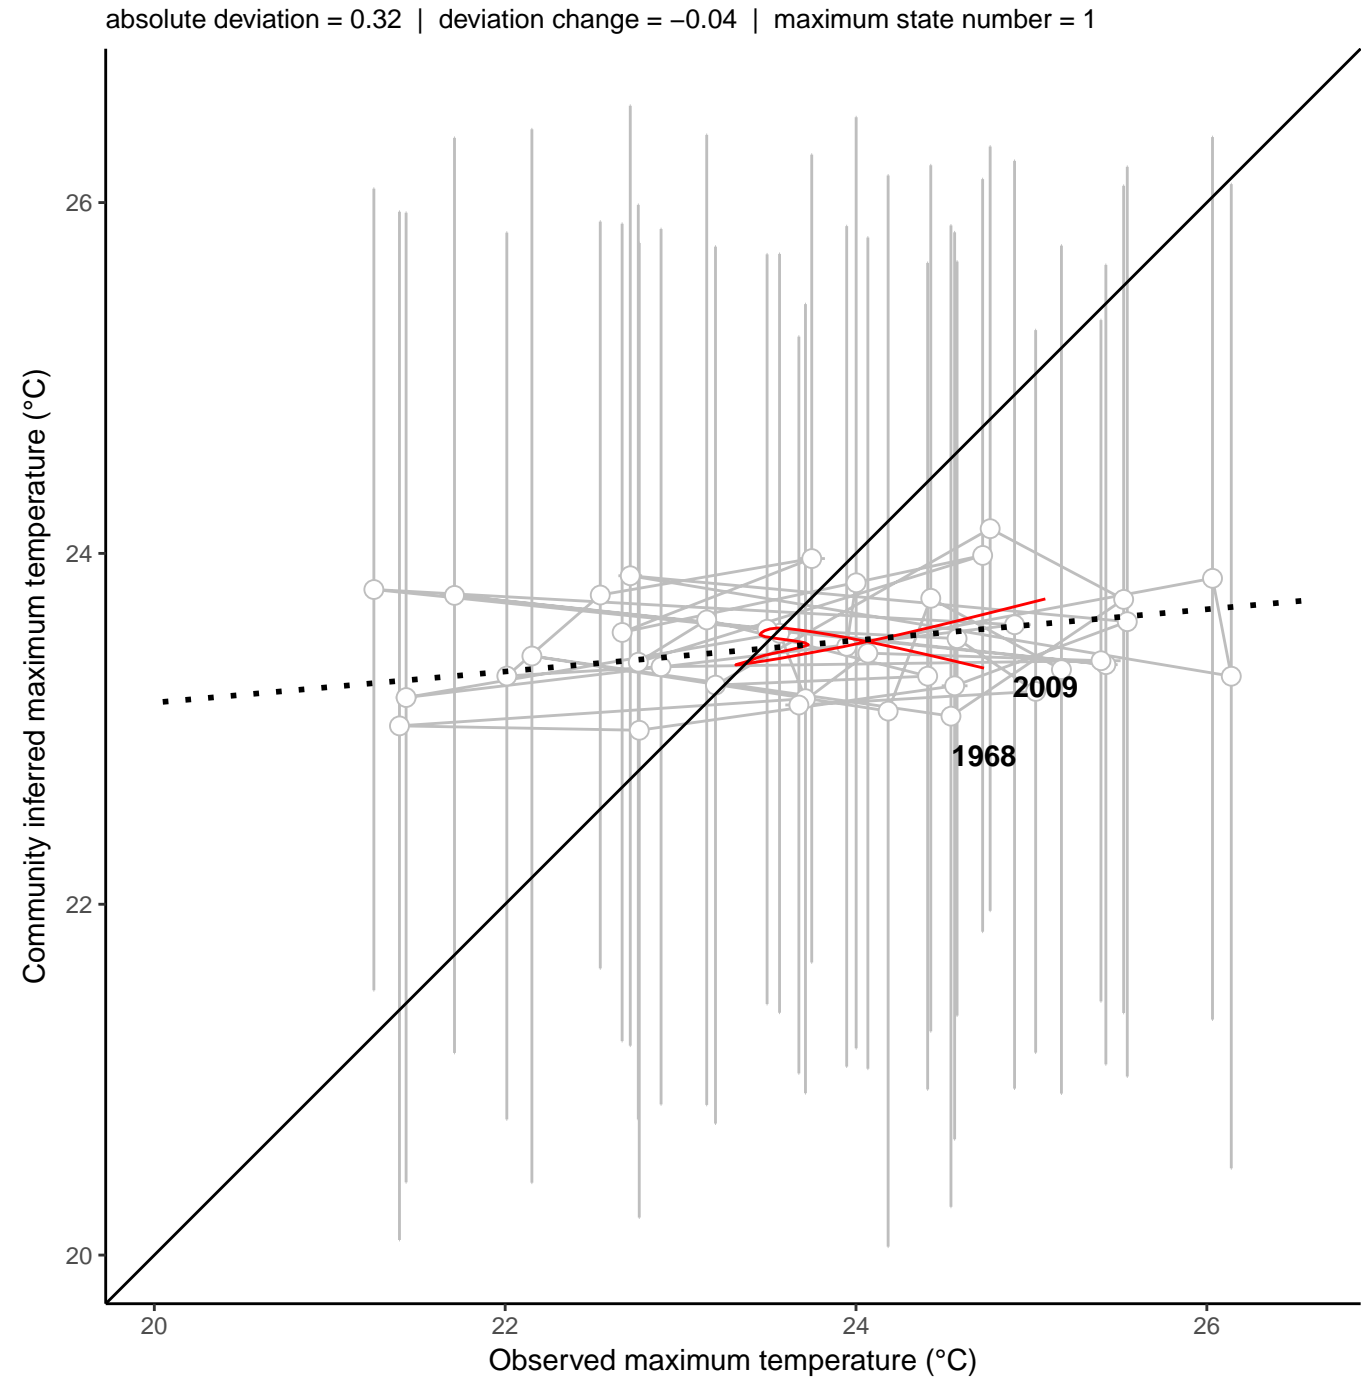

site : 840\_91\_55

absolute deviation = 1.12 | deviation change = 1.13 | maximum state number = 1

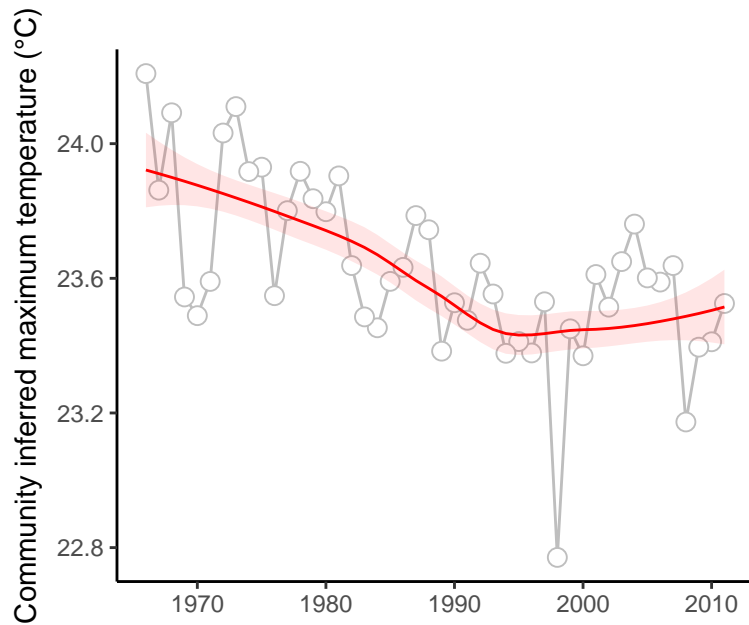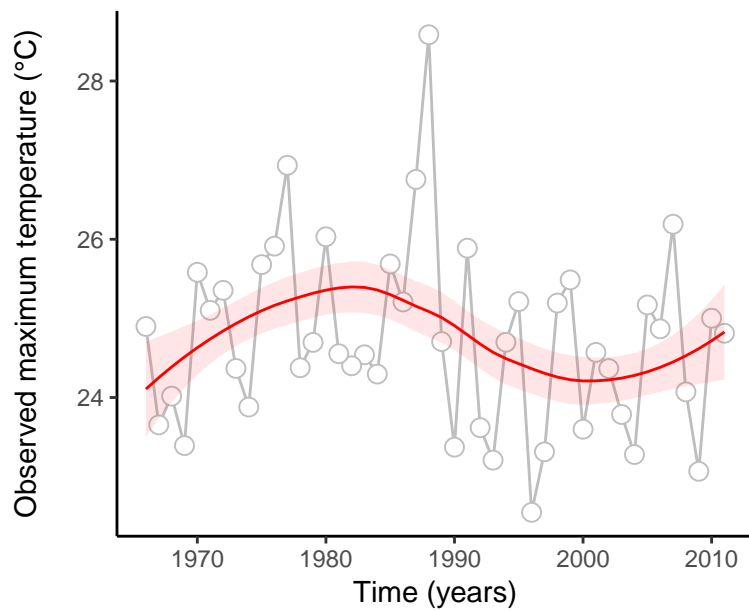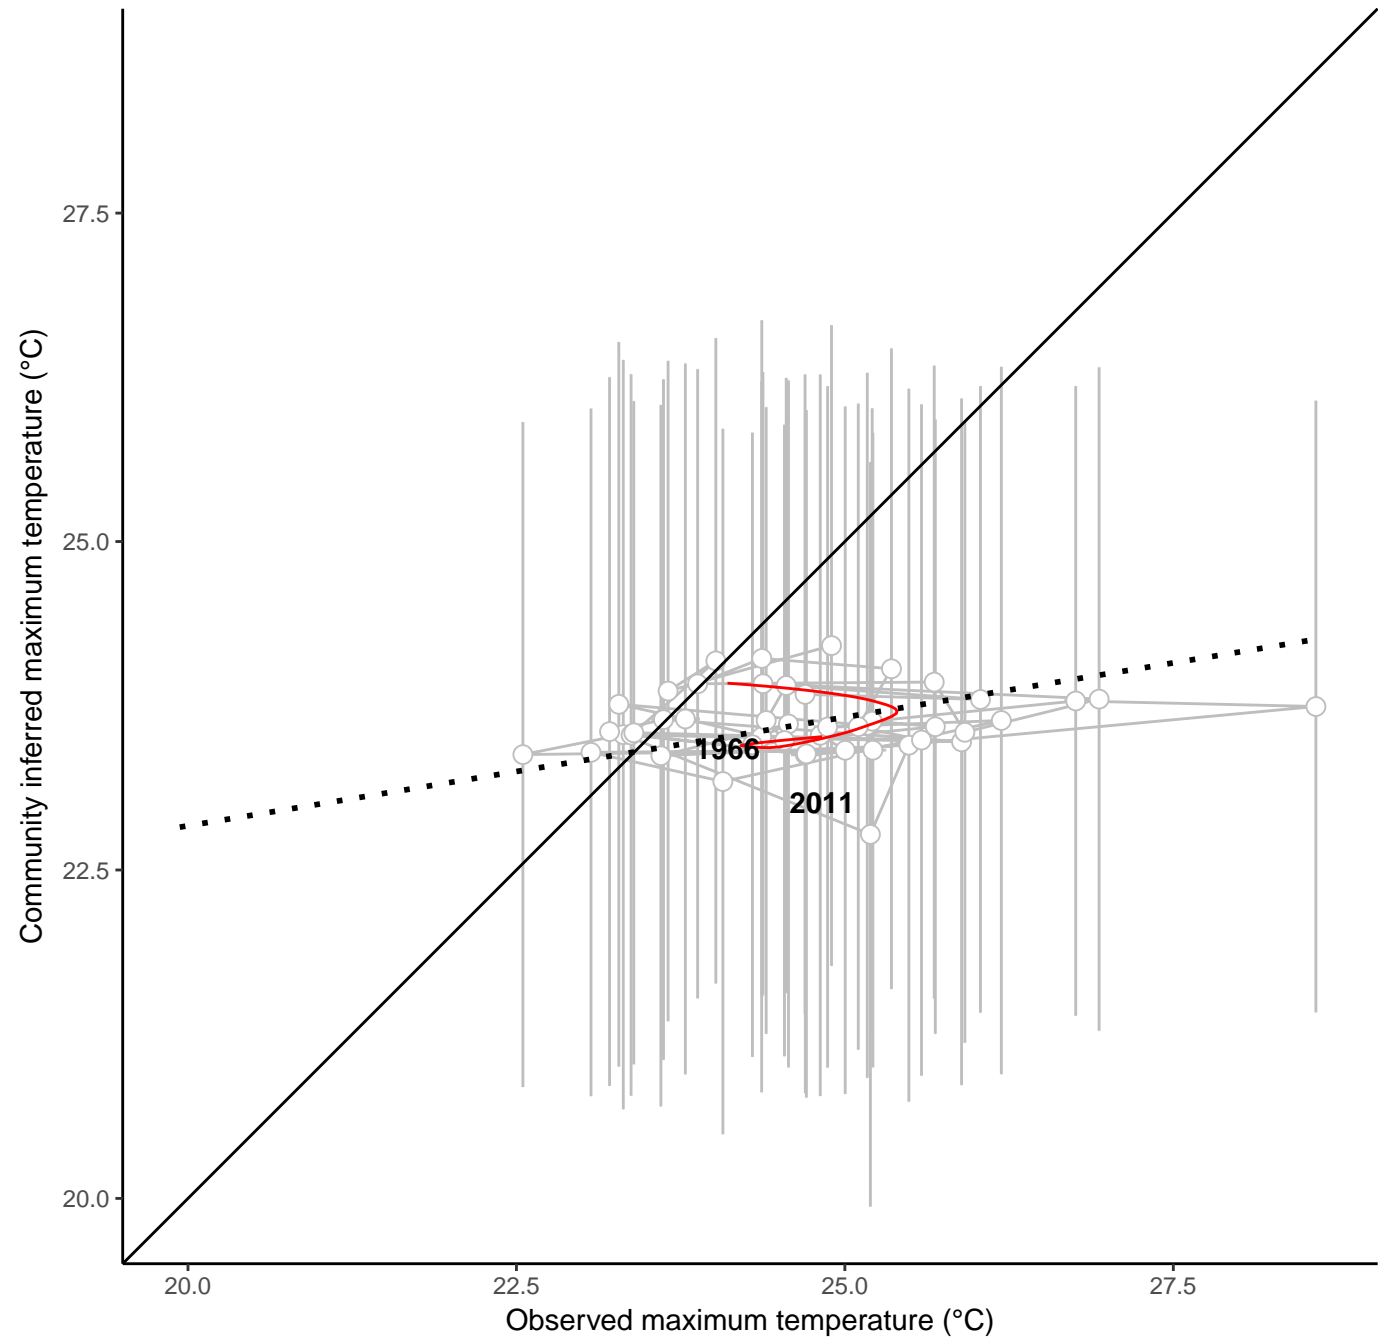

site : 840\_14\_184

absolute deviation = 4.07 | deviation change = -2.91 | maximum state number = 1

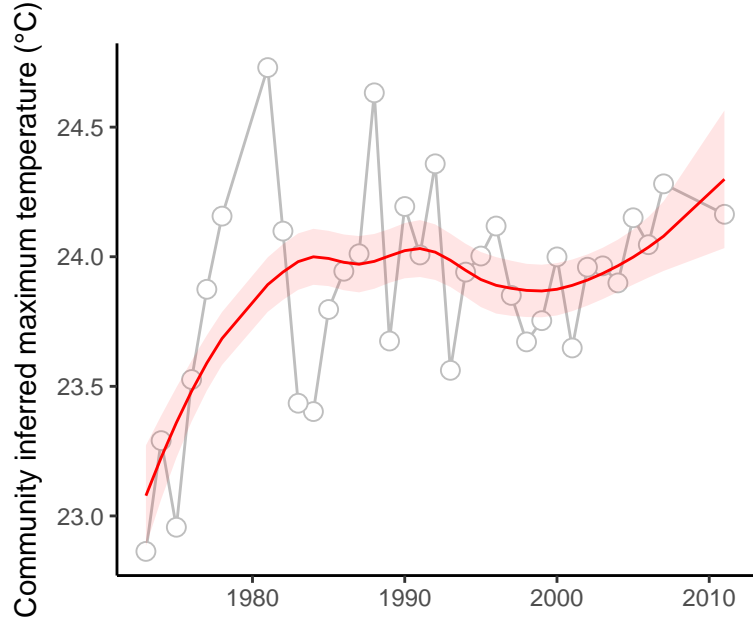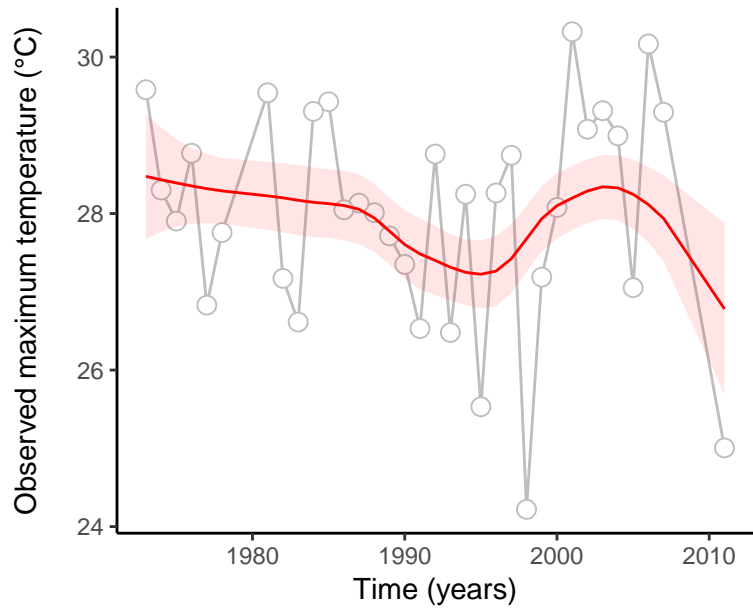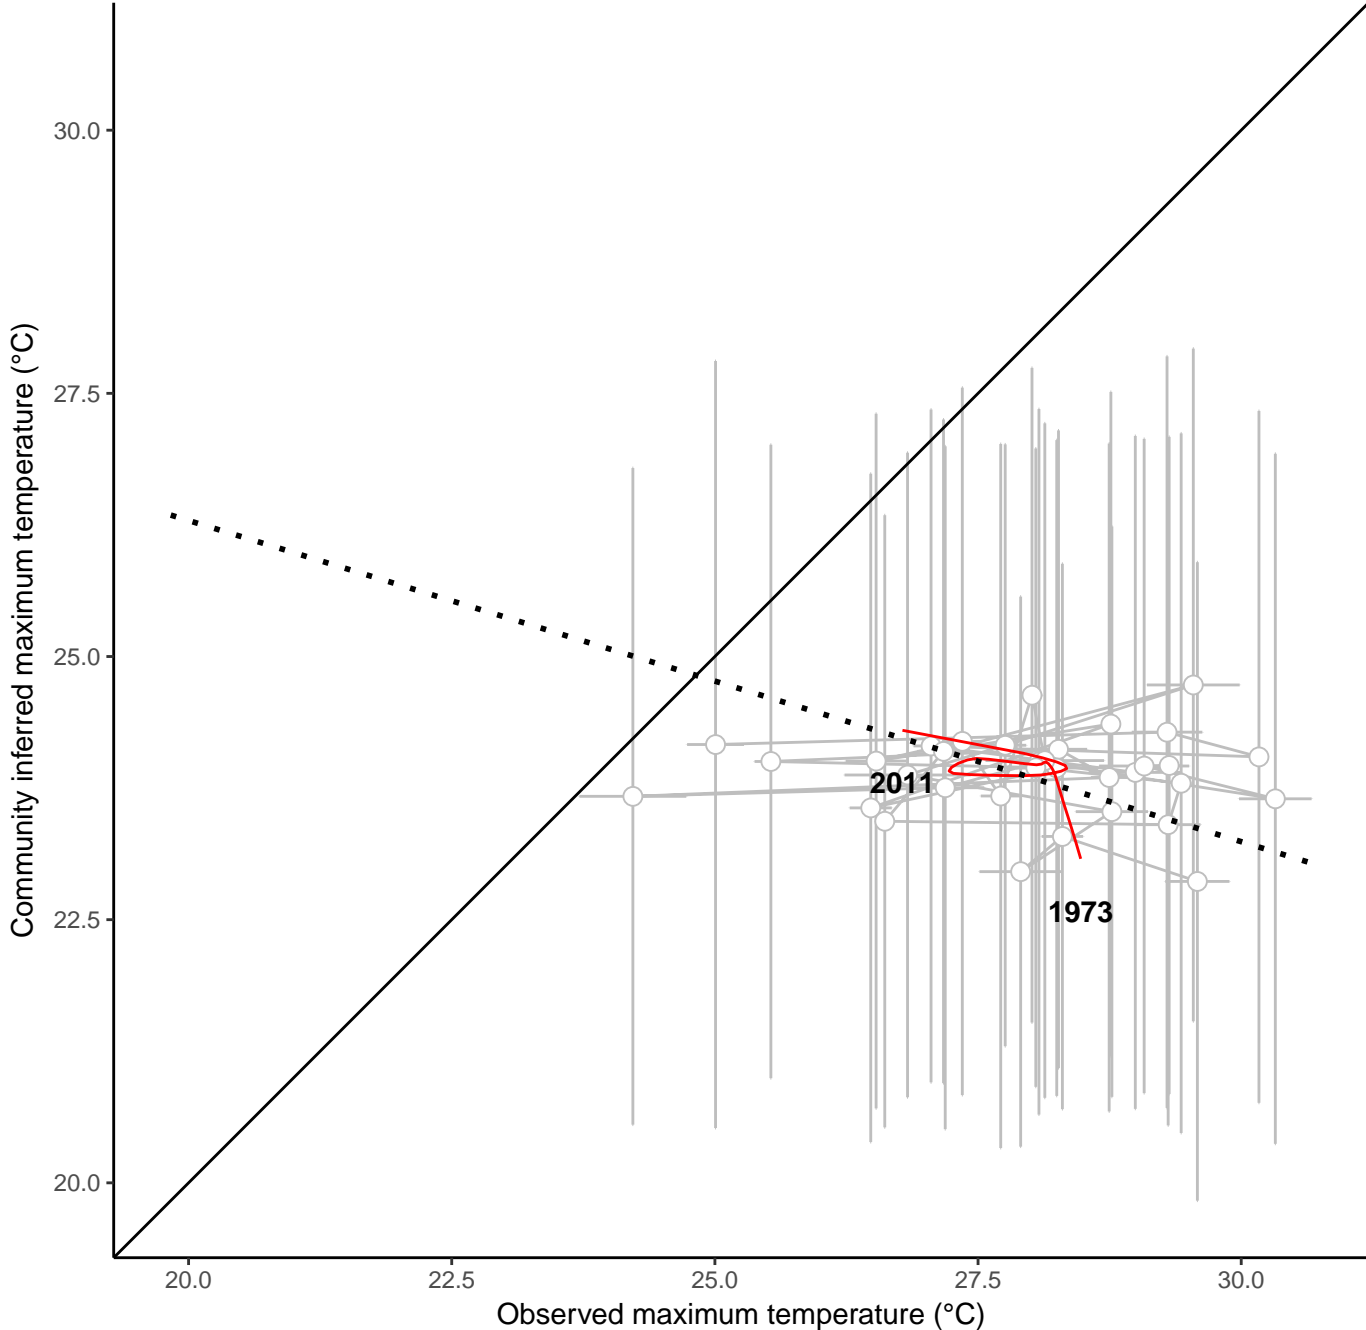



site : 840\_2\_25

absolute deviation = 4.65 | deviation change = 1.56 | maximum state number = 1

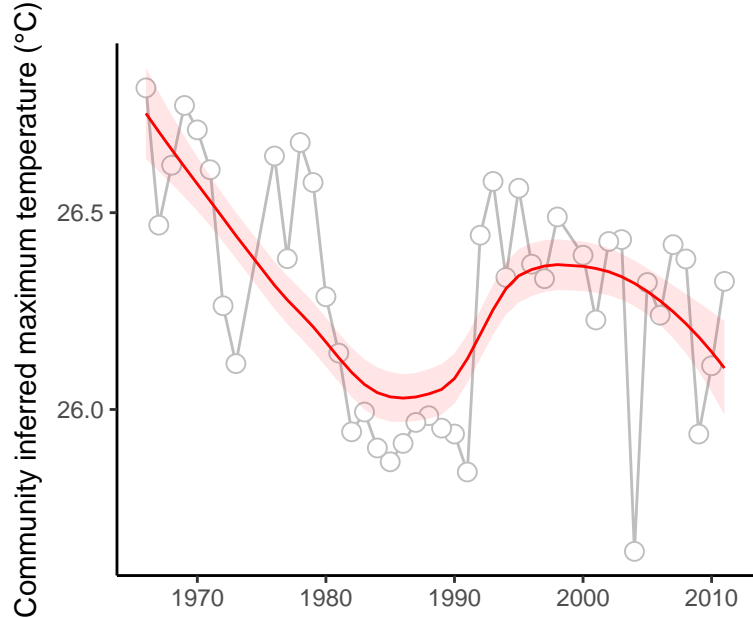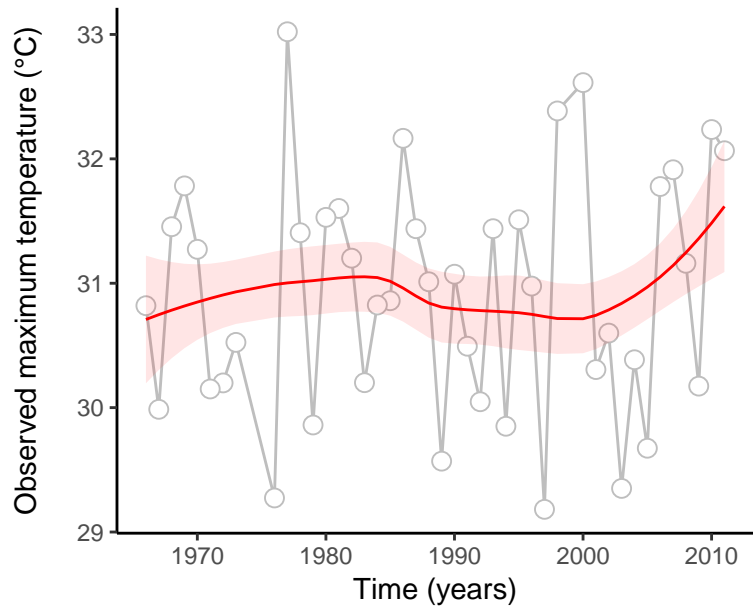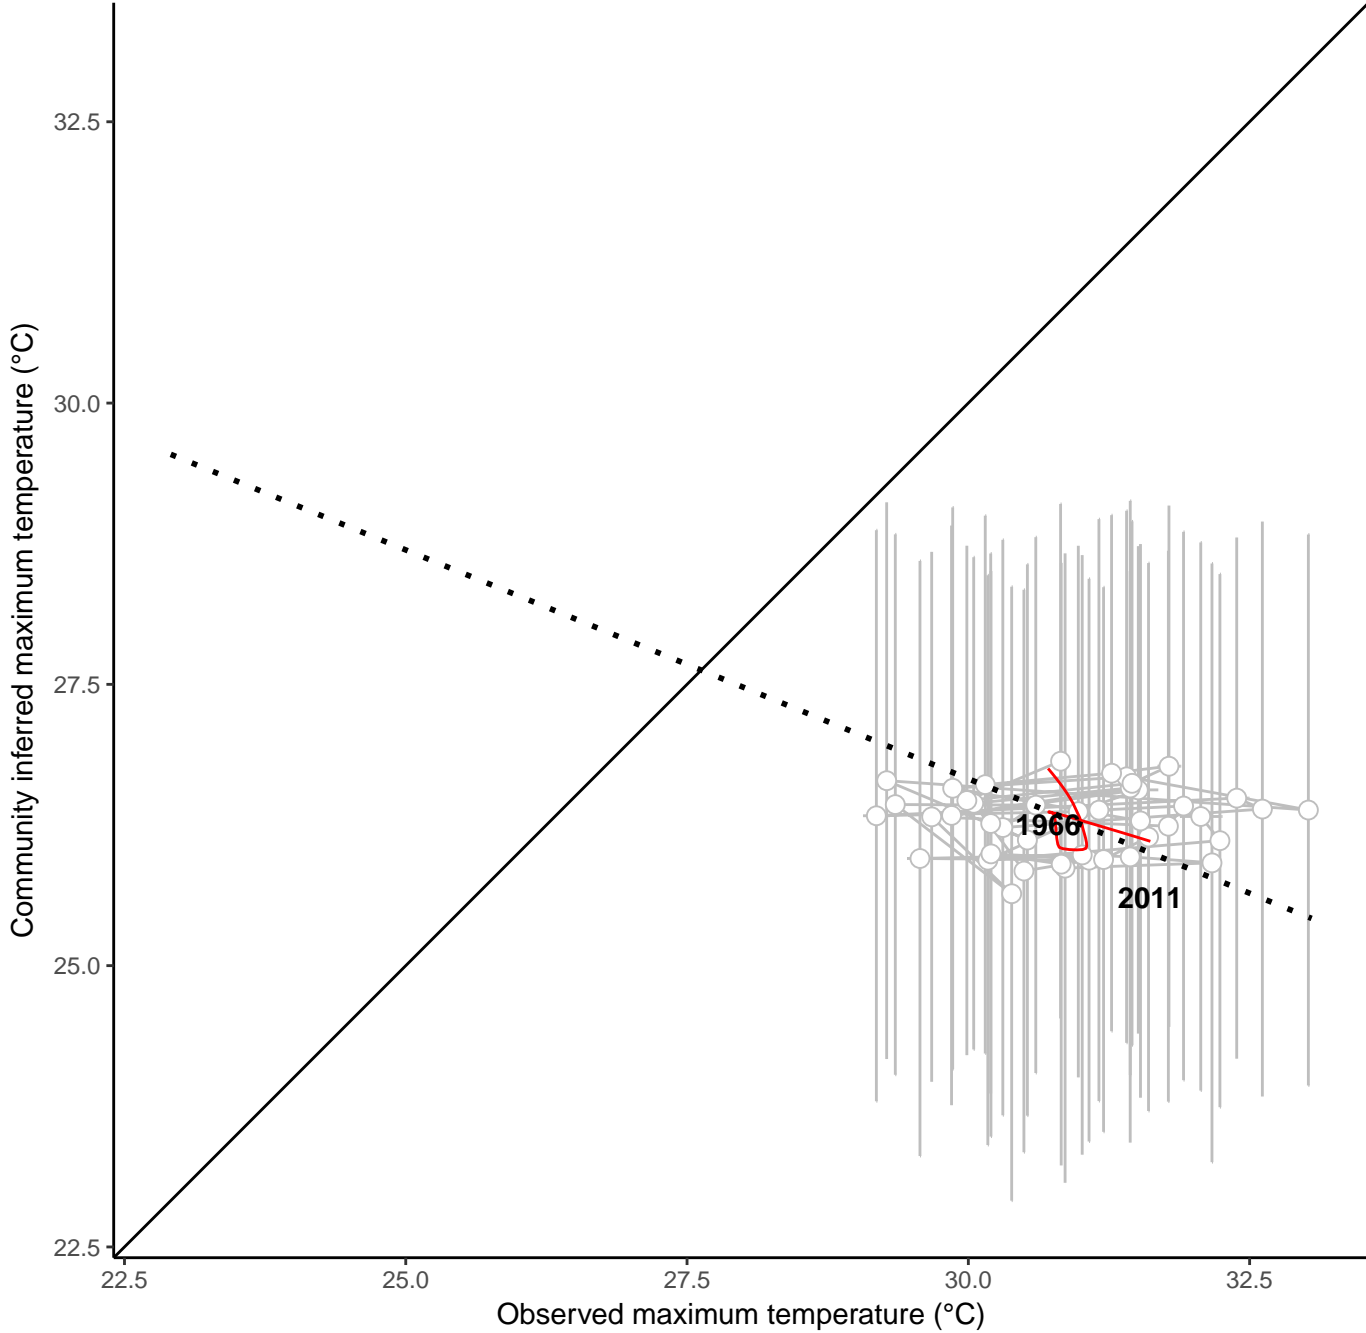

site : 840\_25\_9

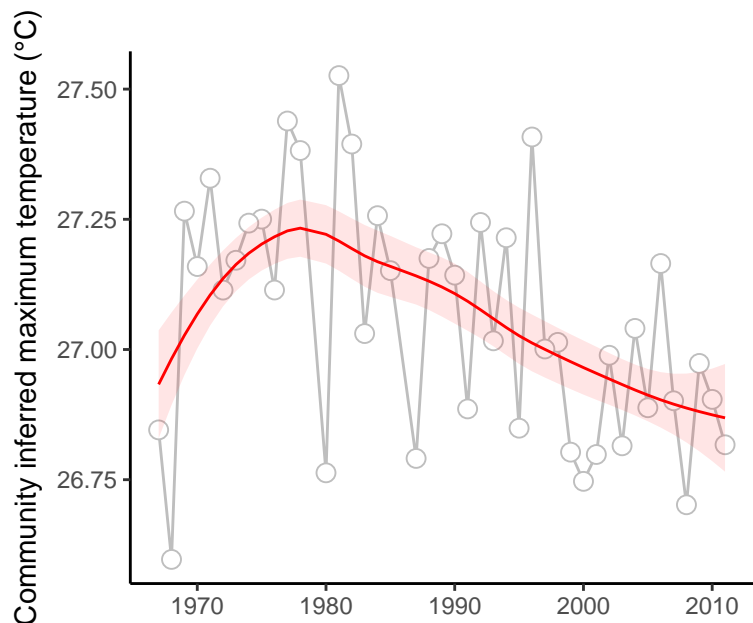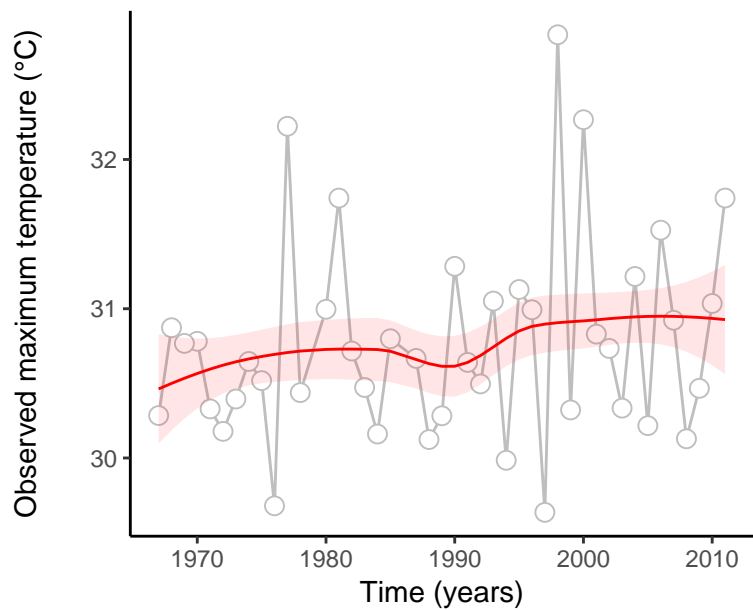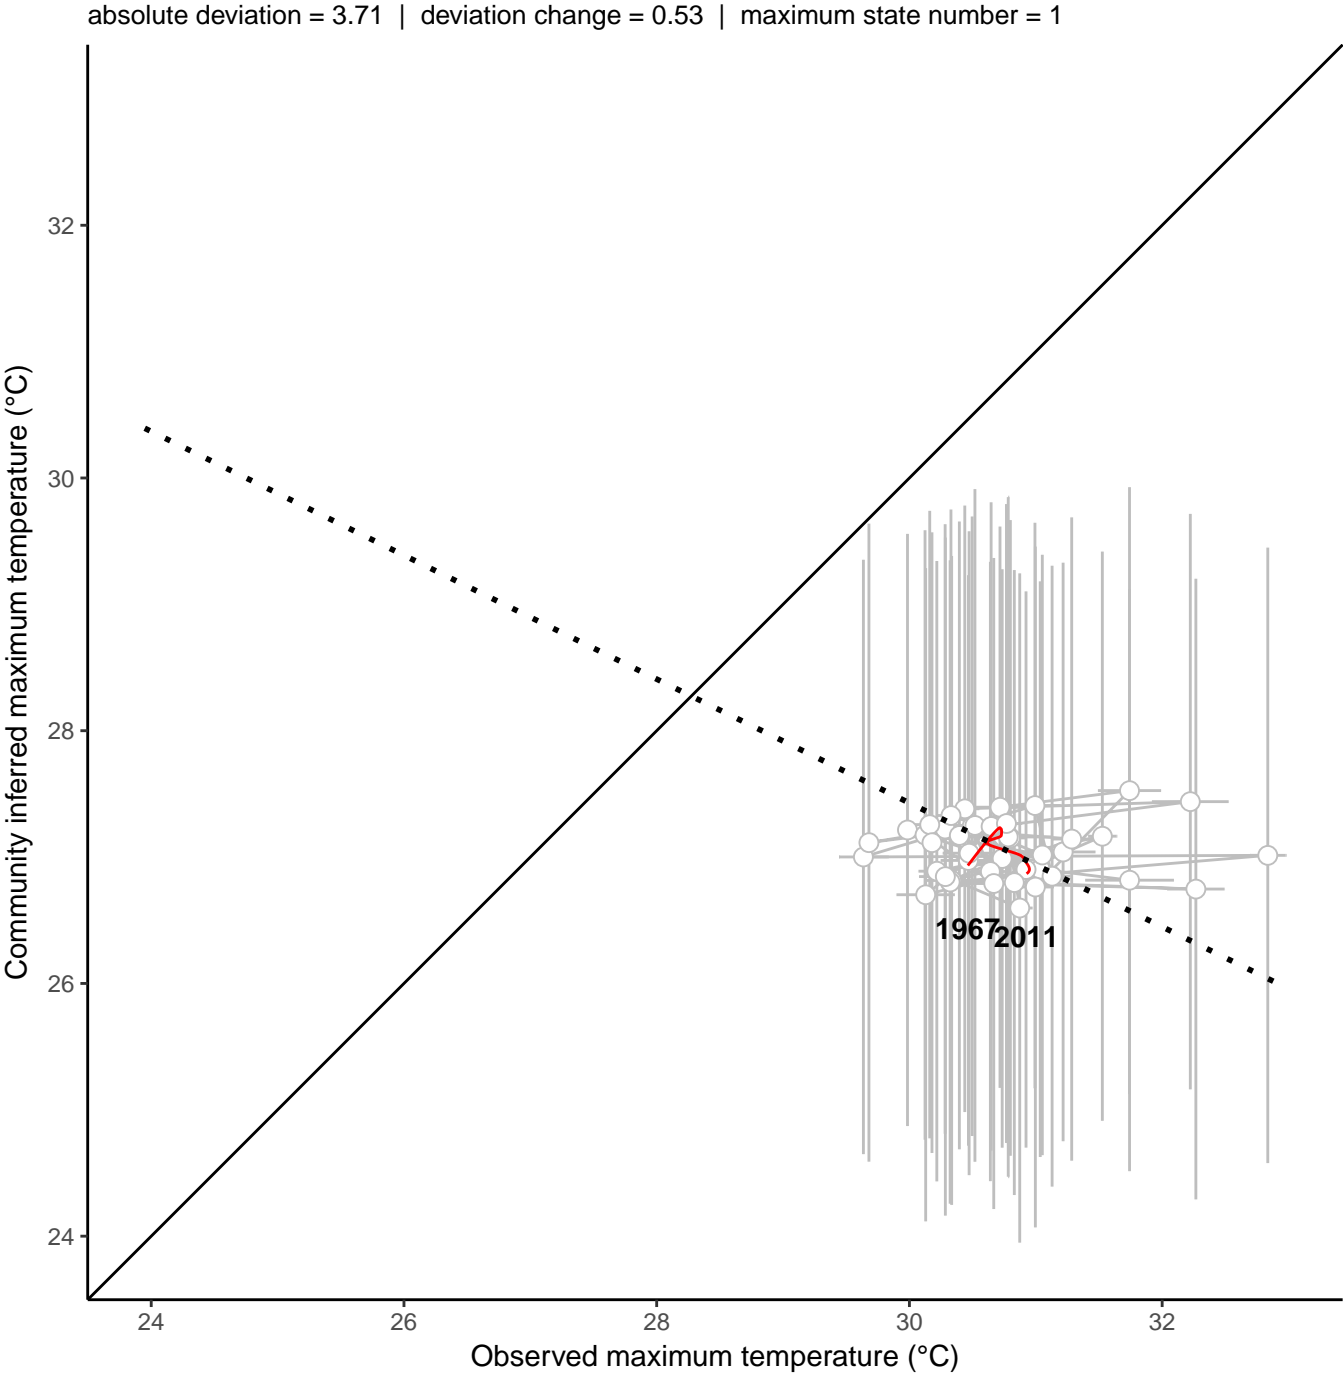

site : 840\_27\_15

absolute deviation = 4.83 | deviation change = 2.46 | maximum state number = 1

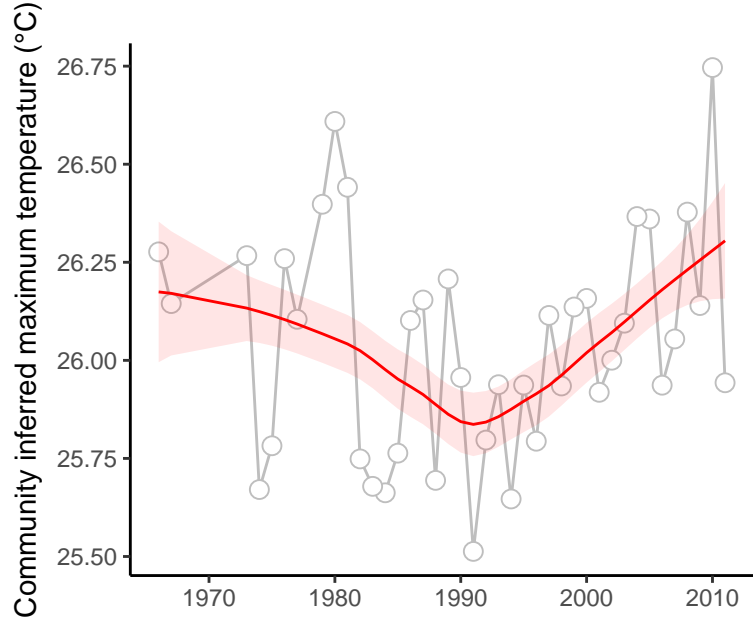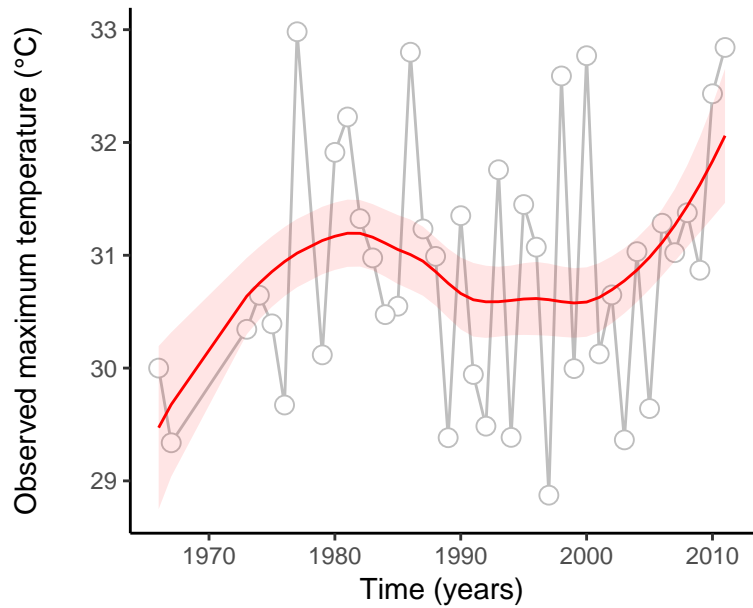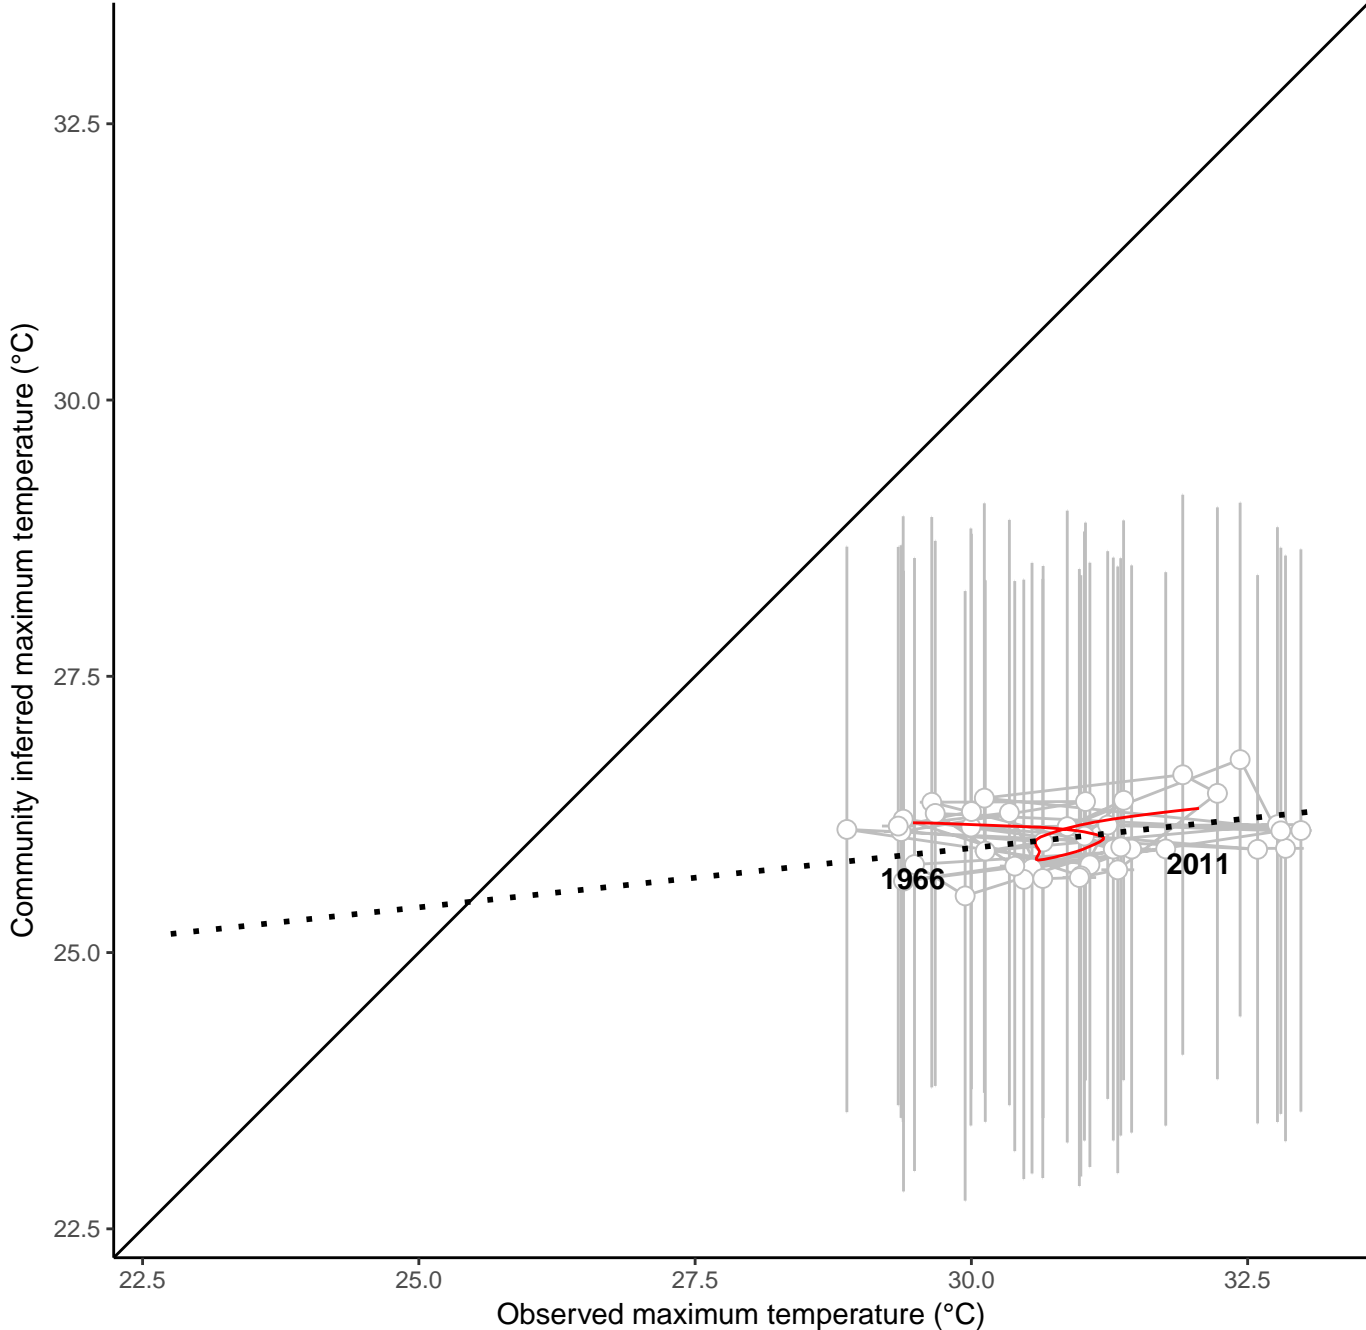

site : 840\_27\_33

absolute deviation = 5.45 | deviation change = 0.33 | maximum state number = 1

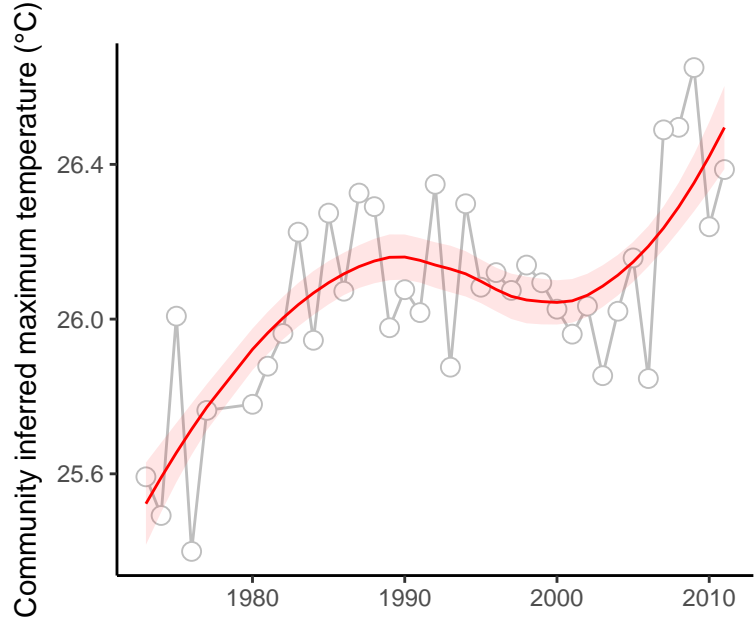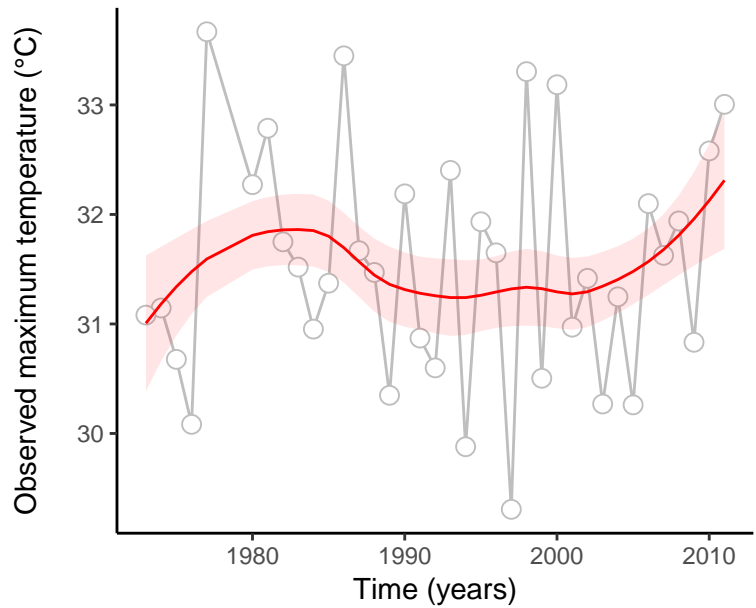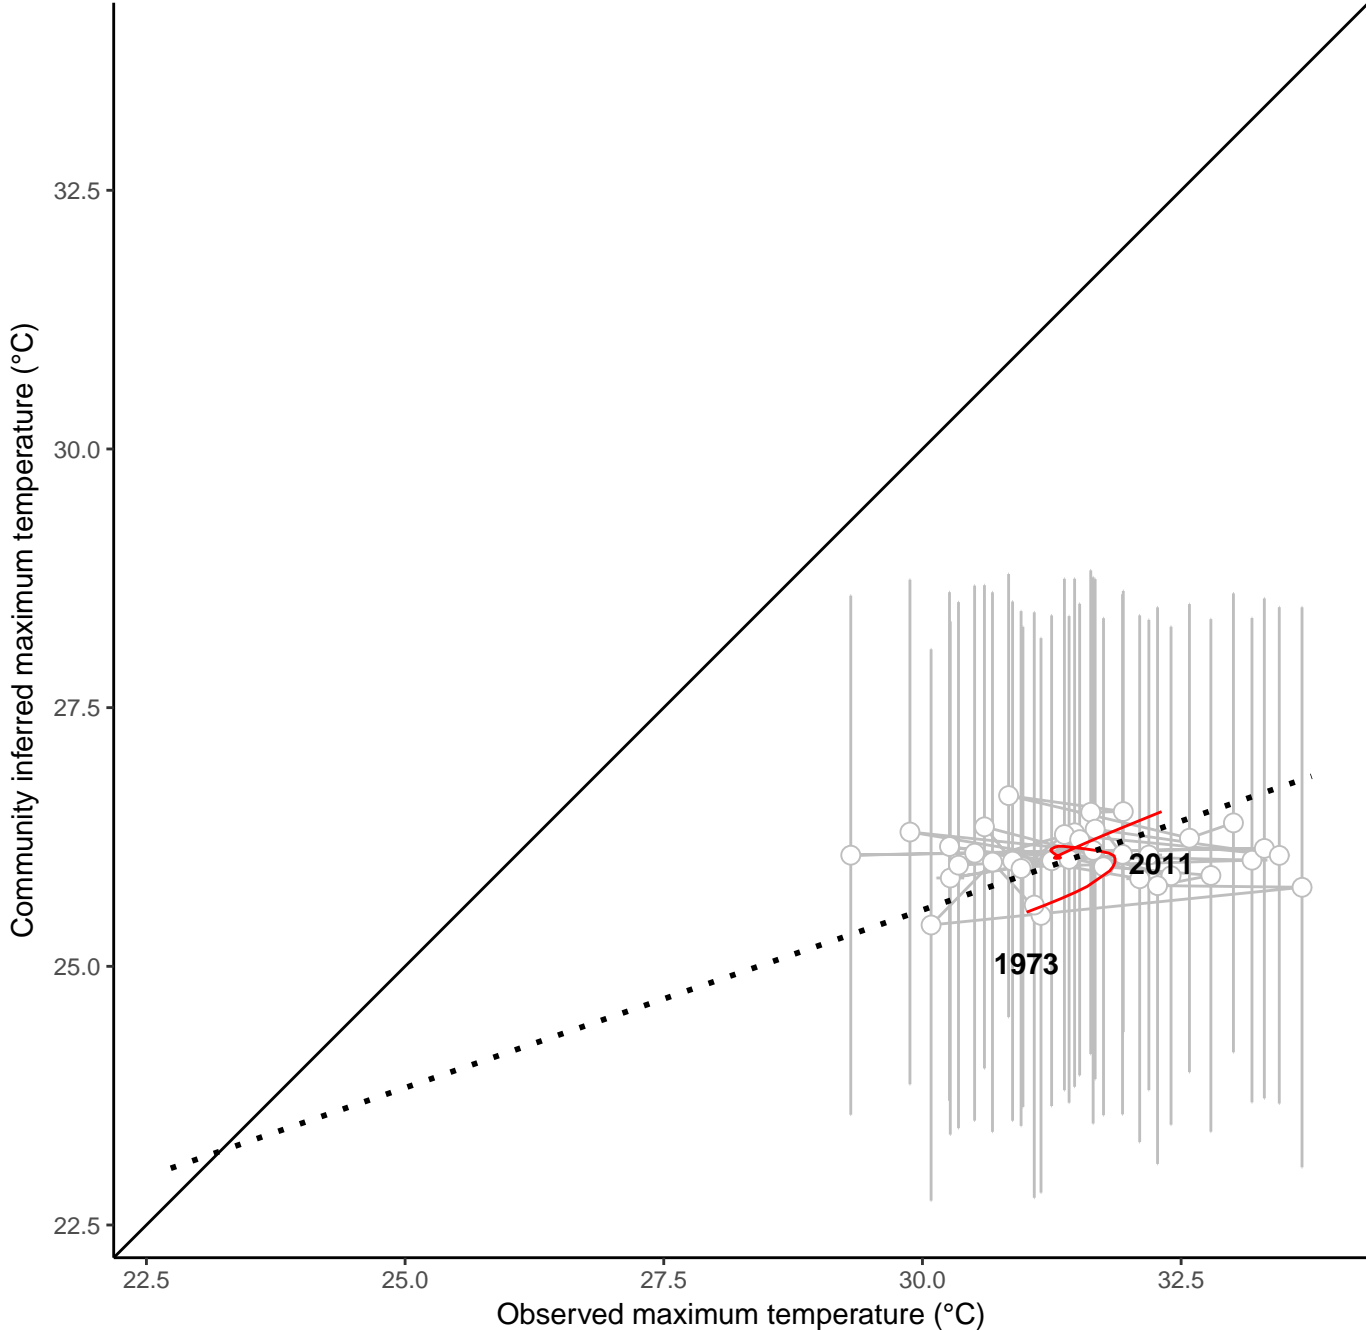

site : 840\_52\_1

absolute deviation = 4.76 | deviation change = 1.41 | maximum state number = 1

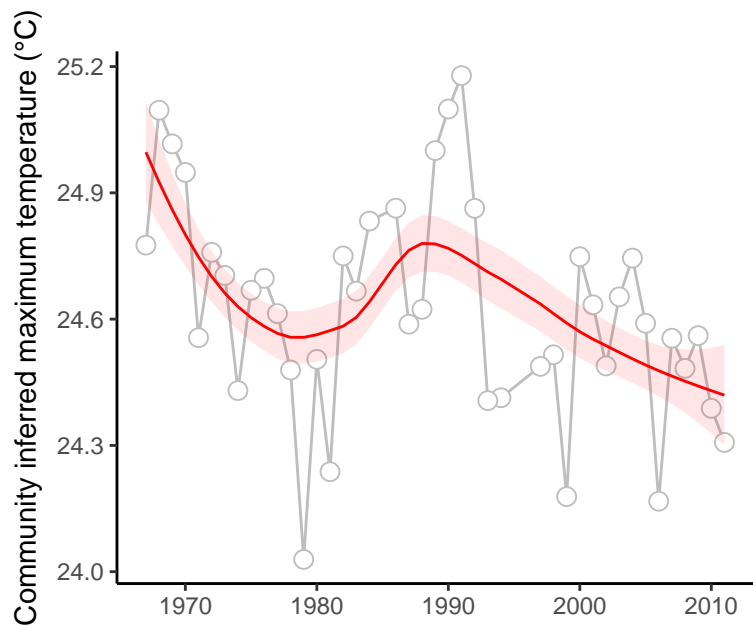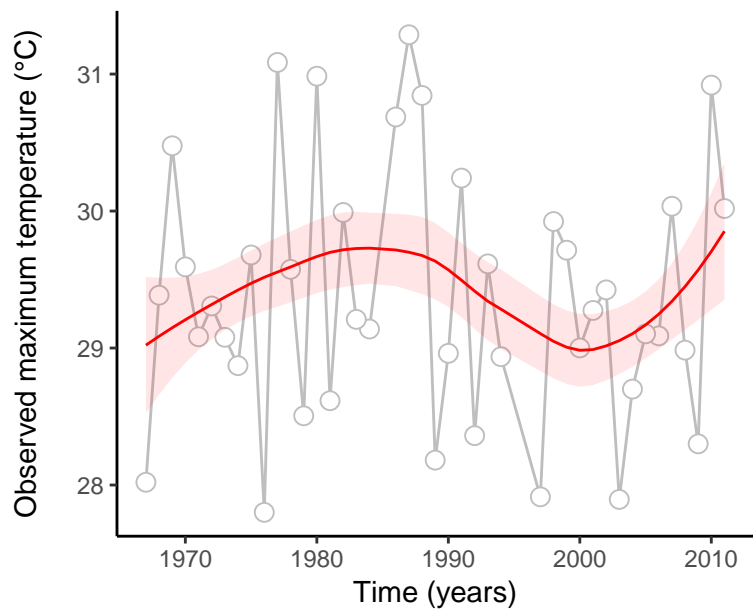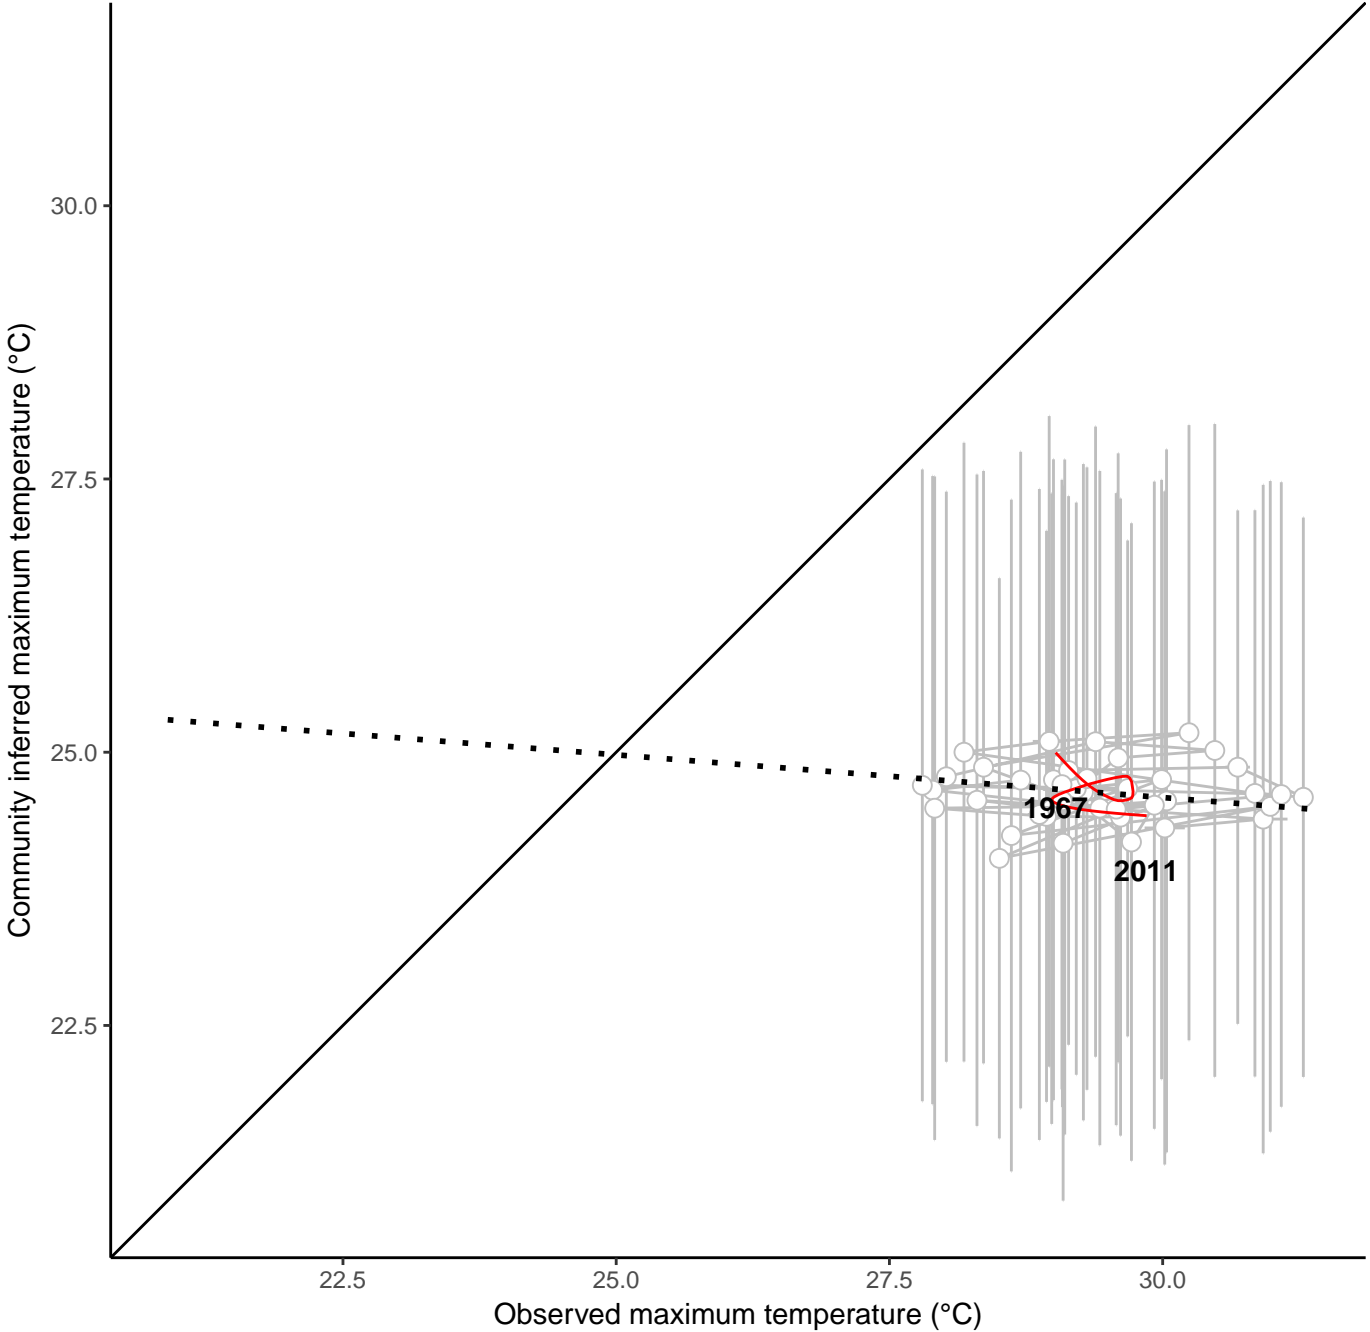

site : 840\_52\_19

absolute deviation = 3.24 | deviation change = 0.68 | maximum state number = 1

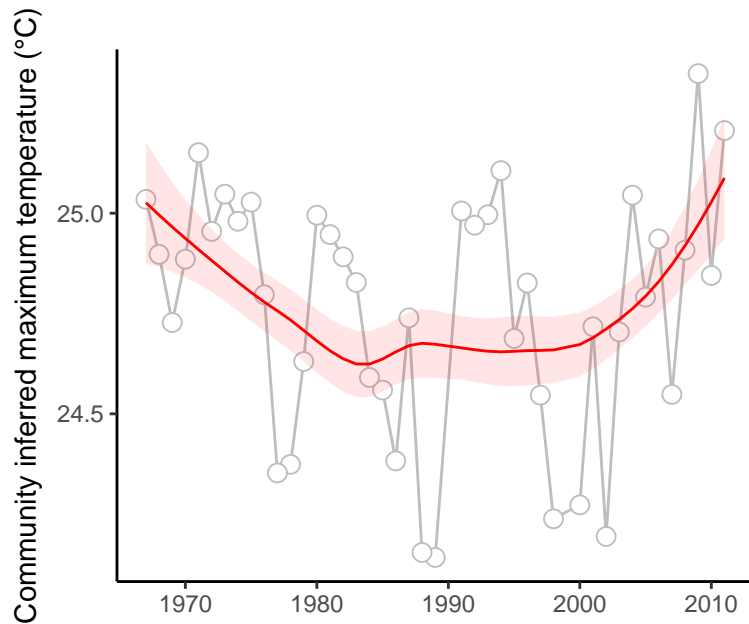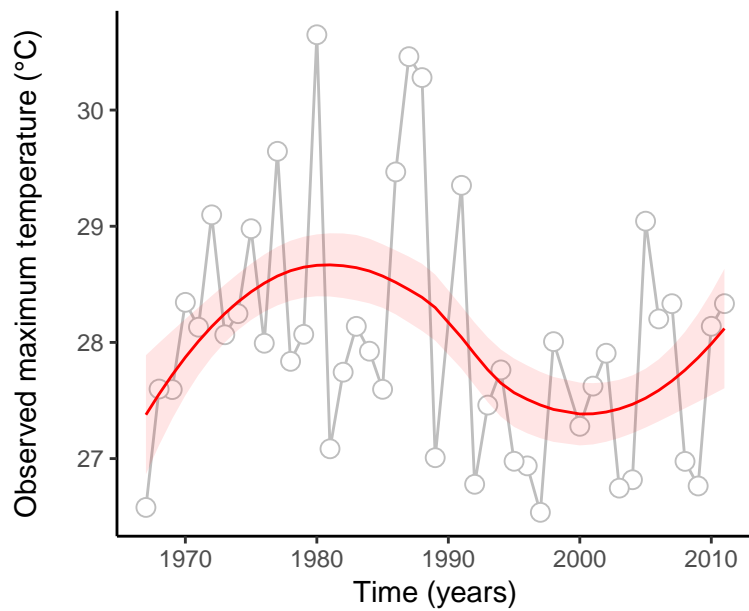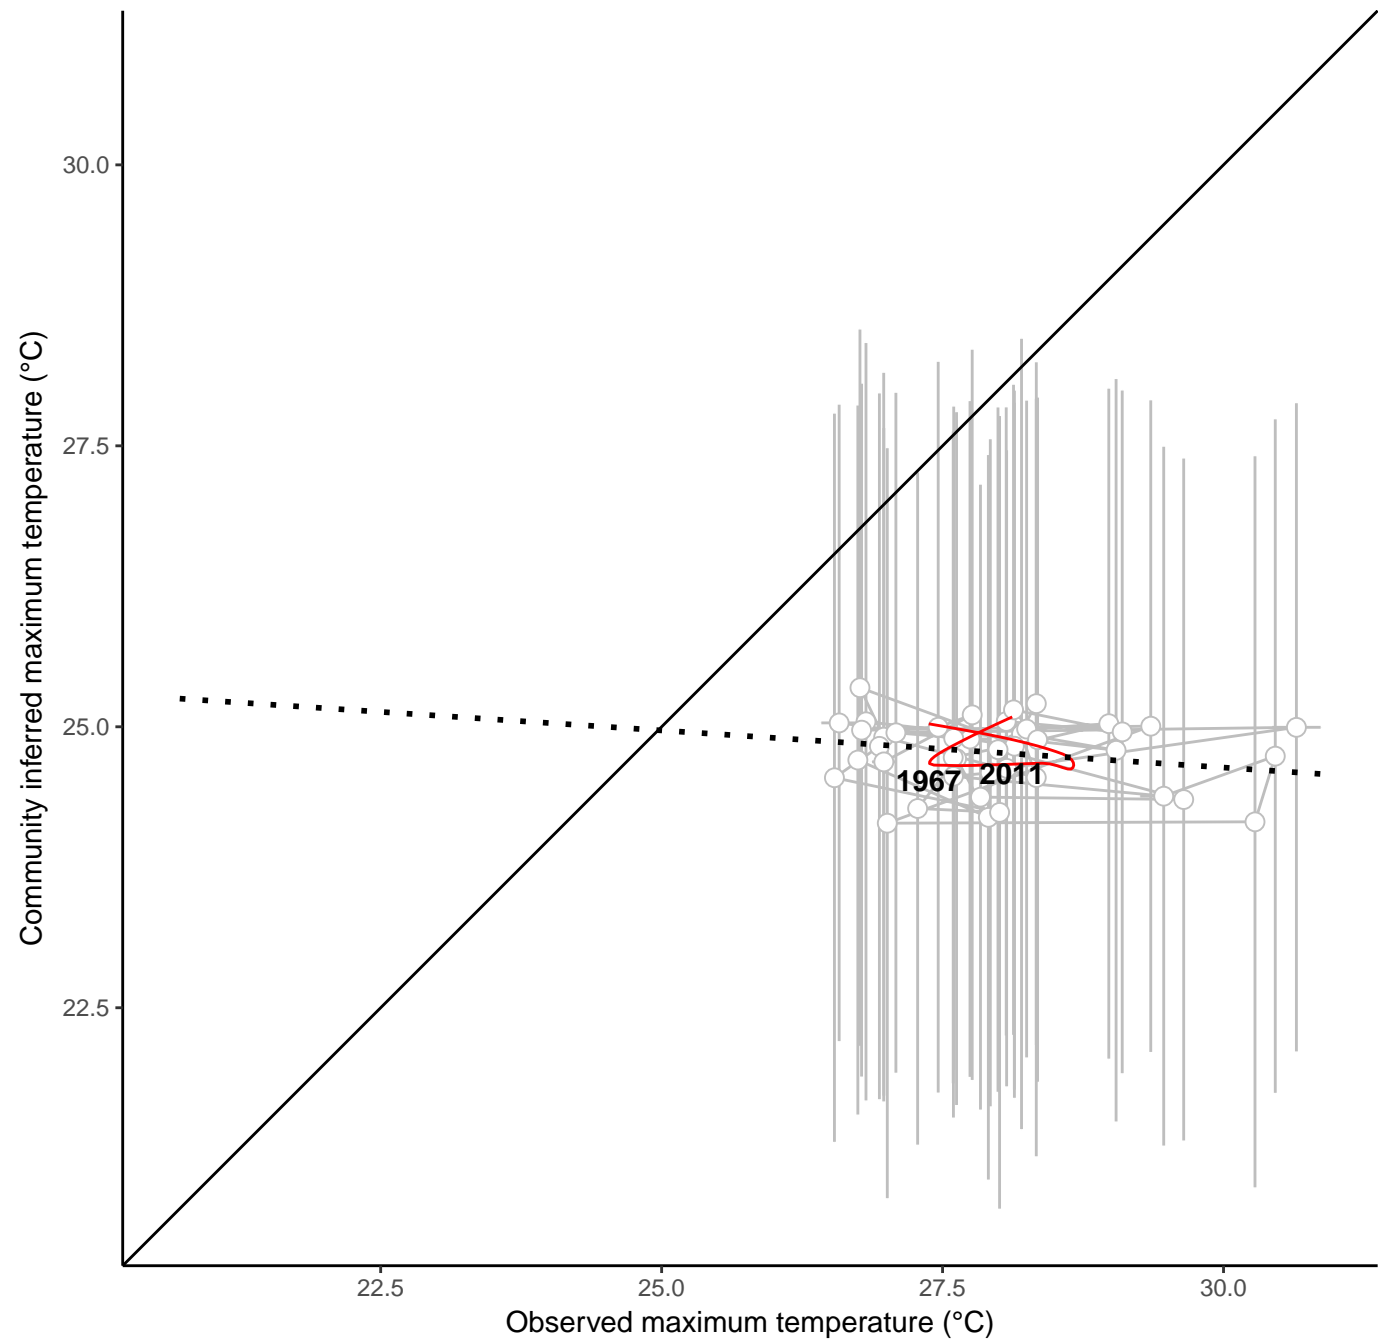

site : 840\_52\_23

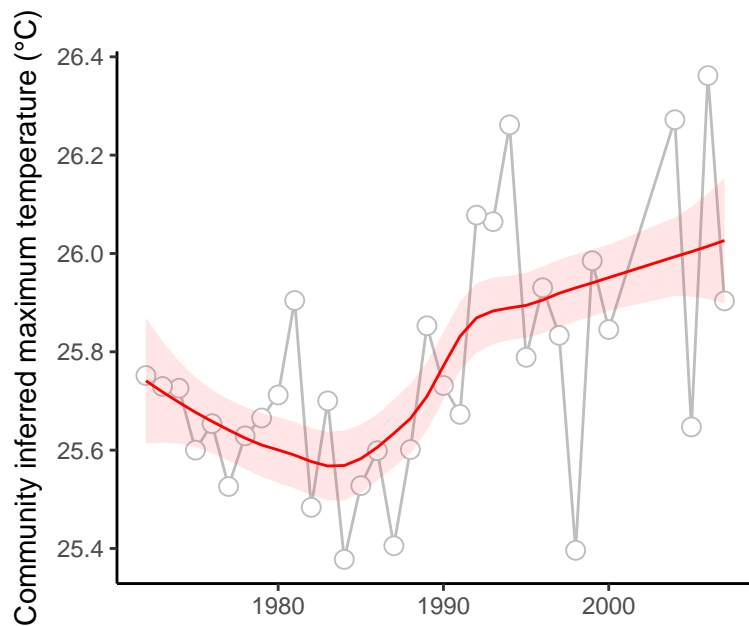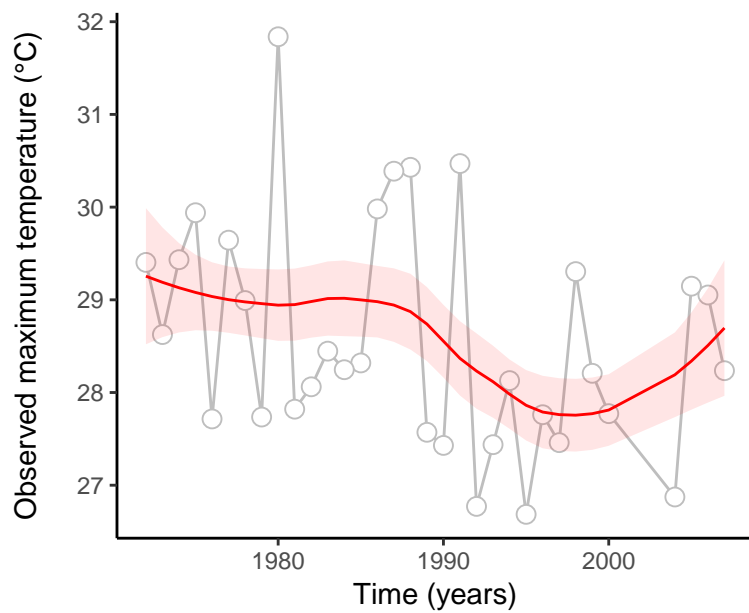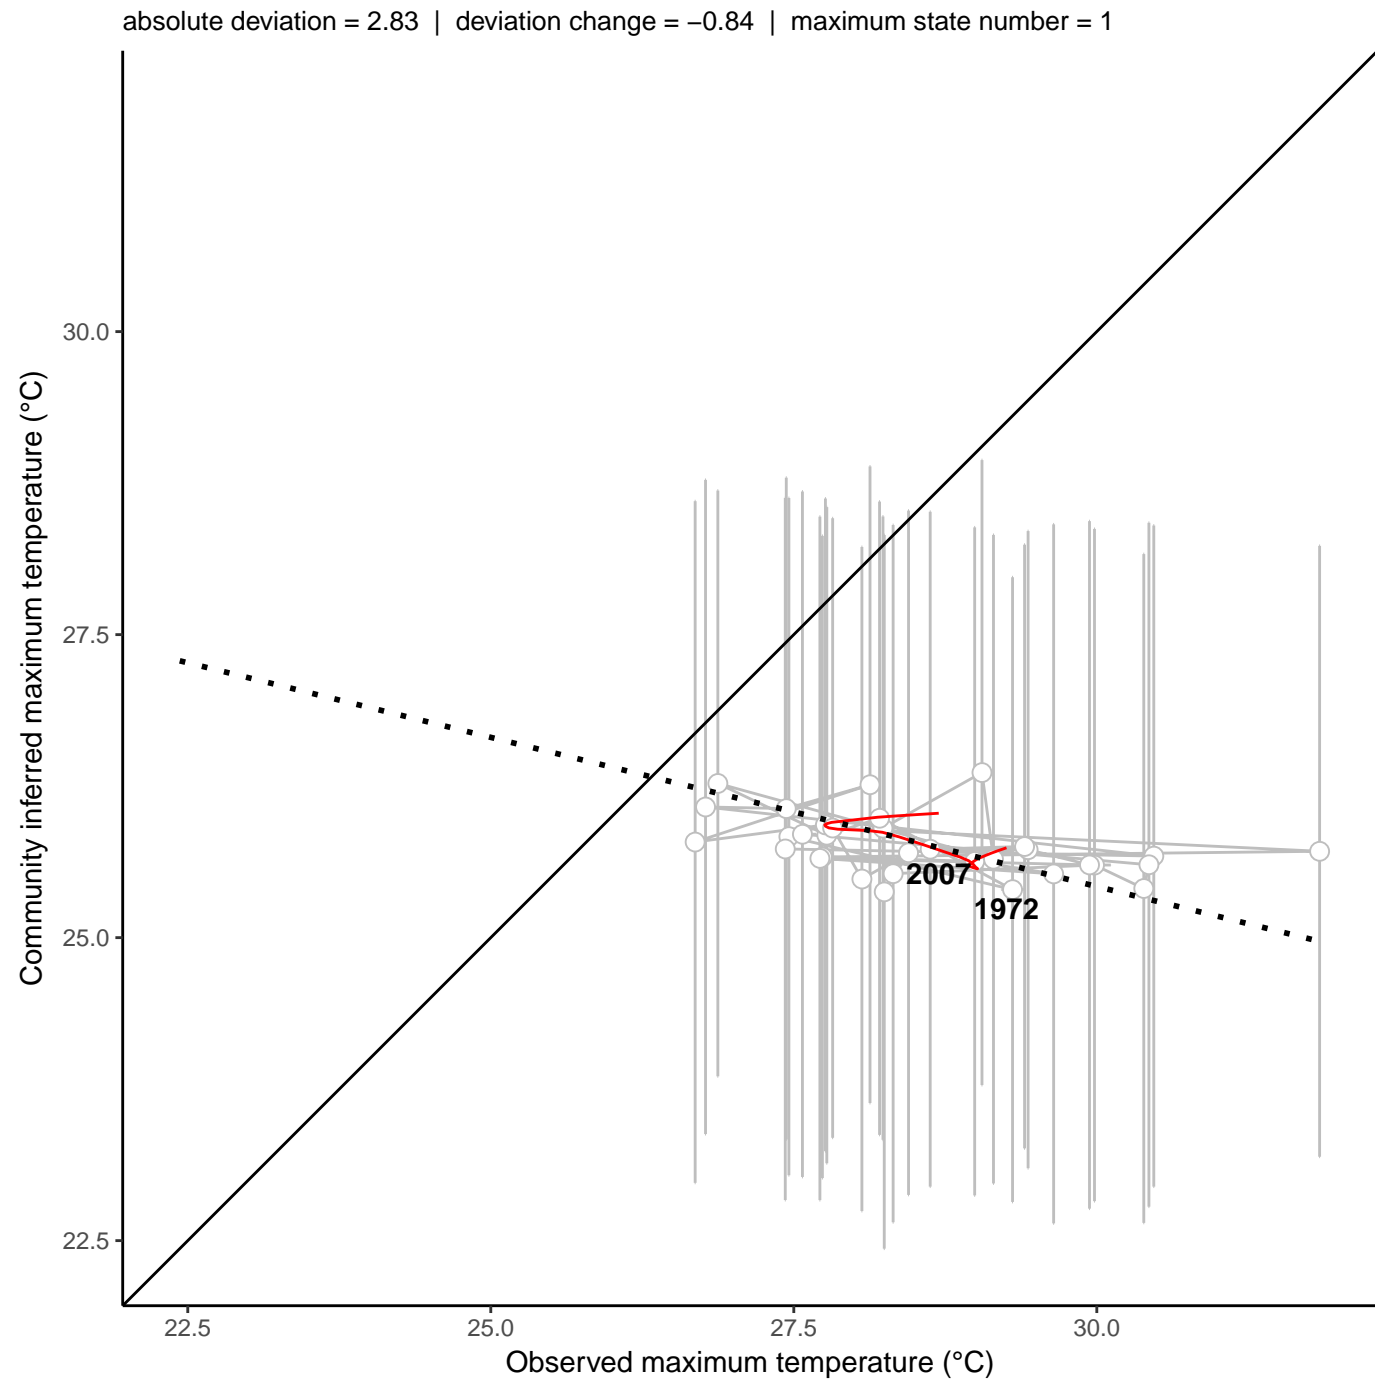

site : 840\_58\_20

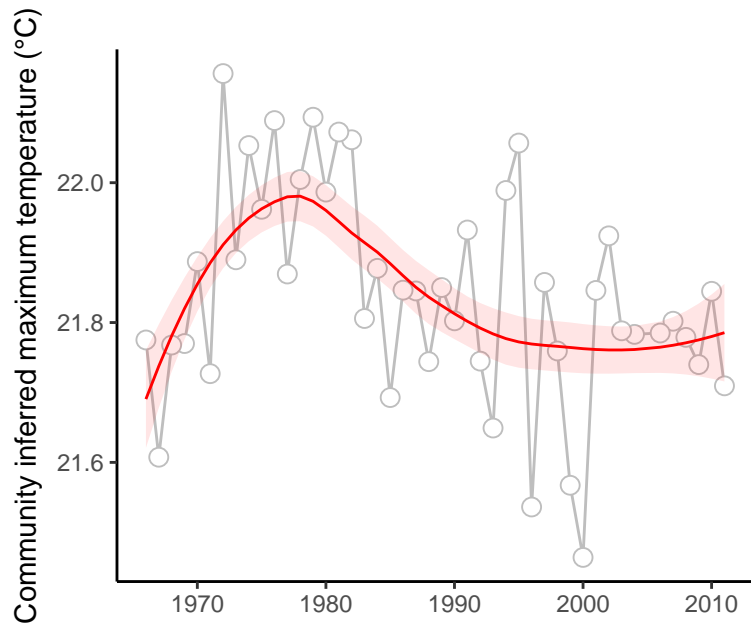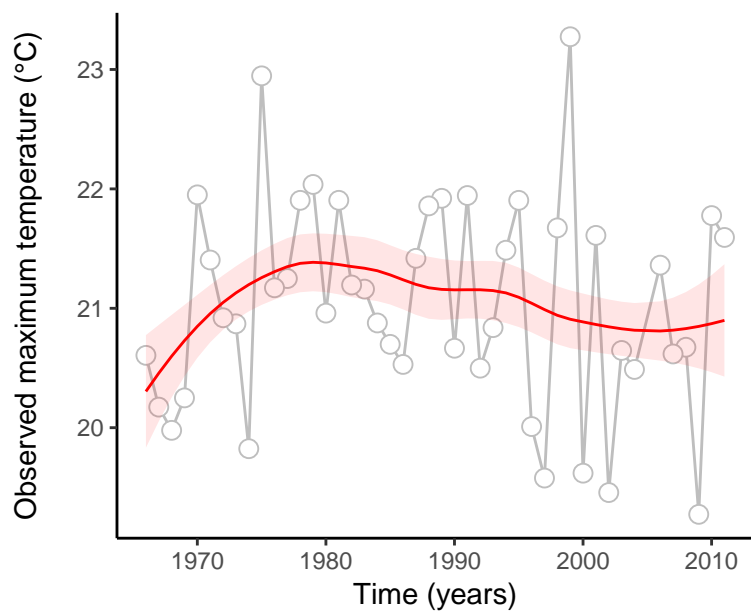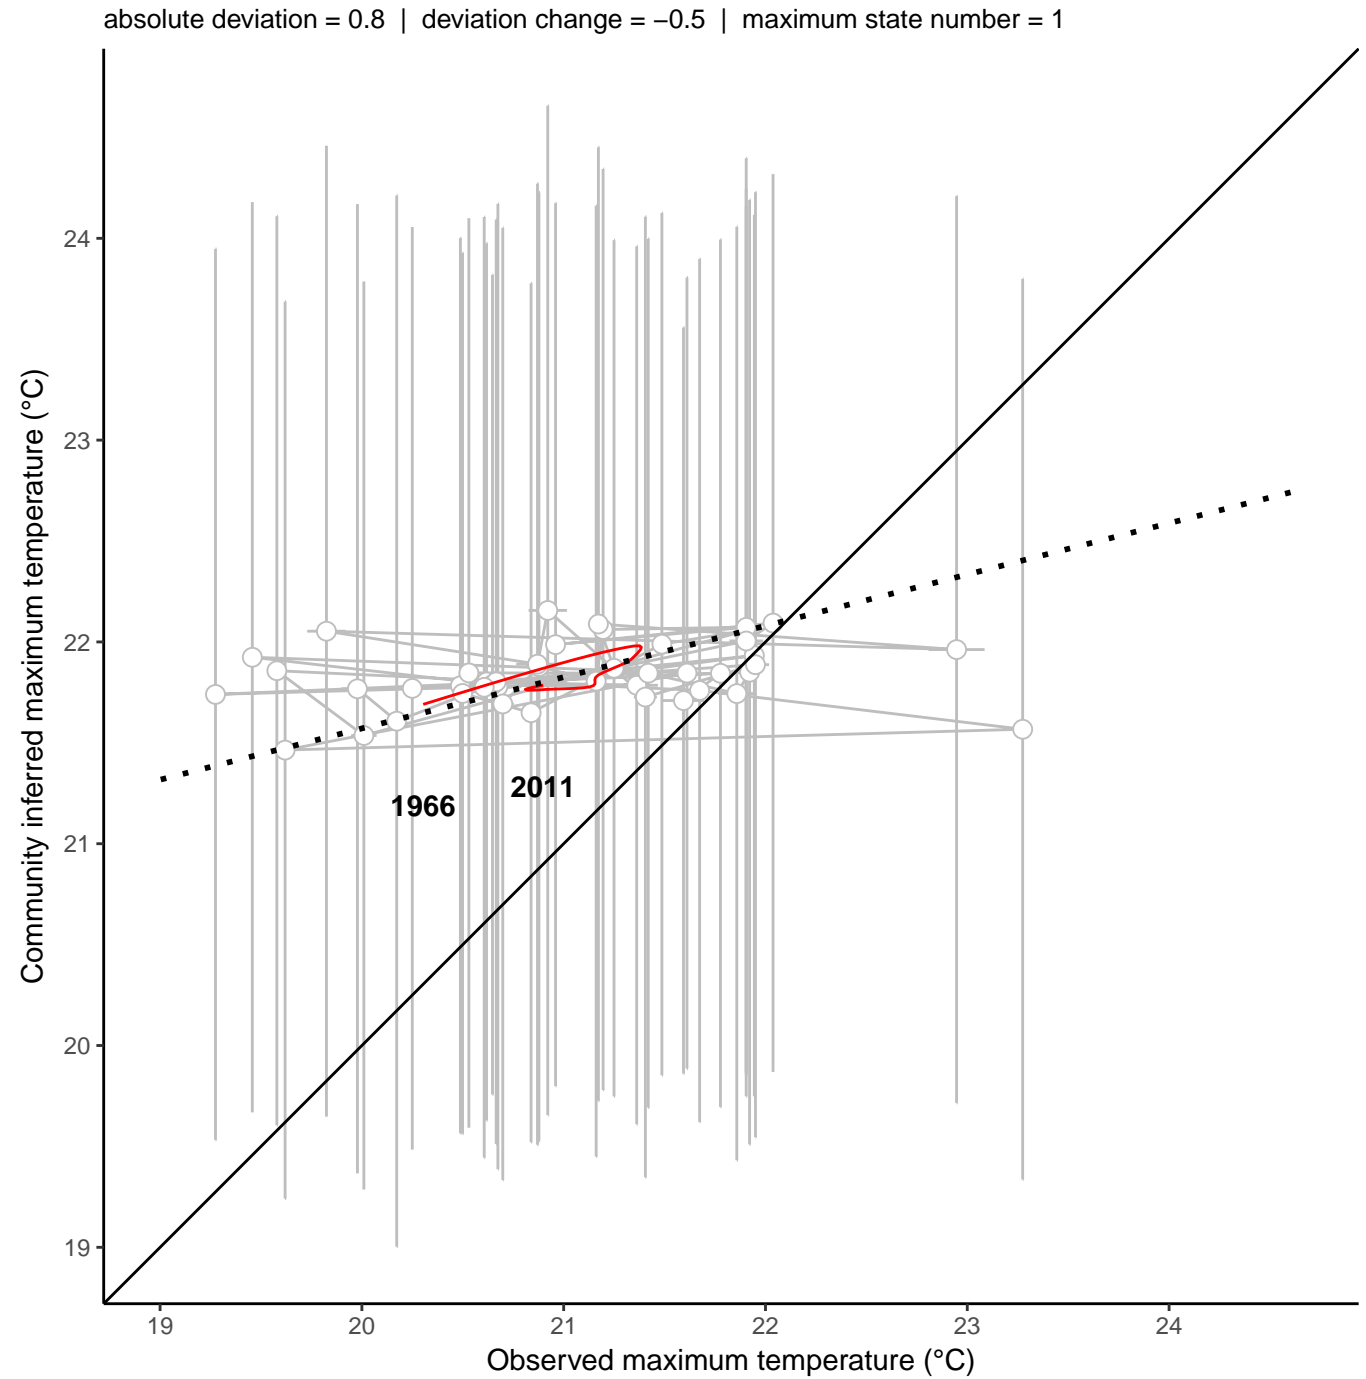



site : 840\_61\_57

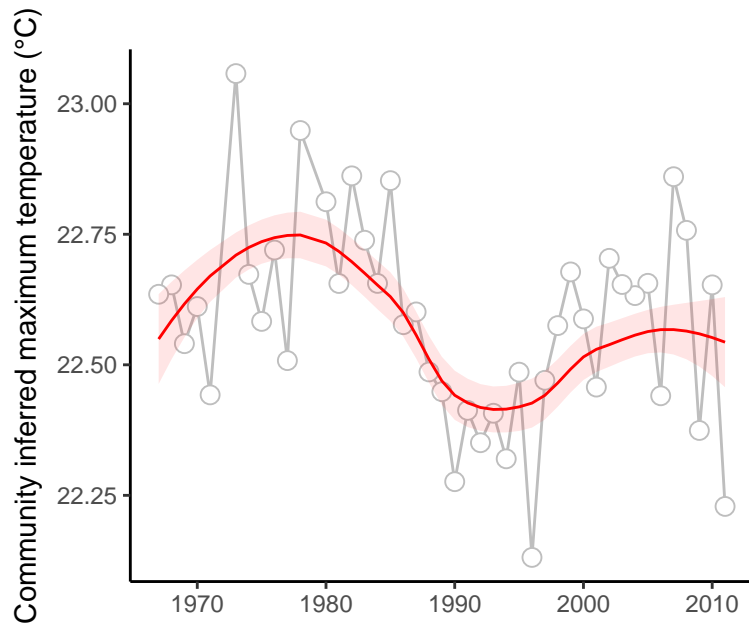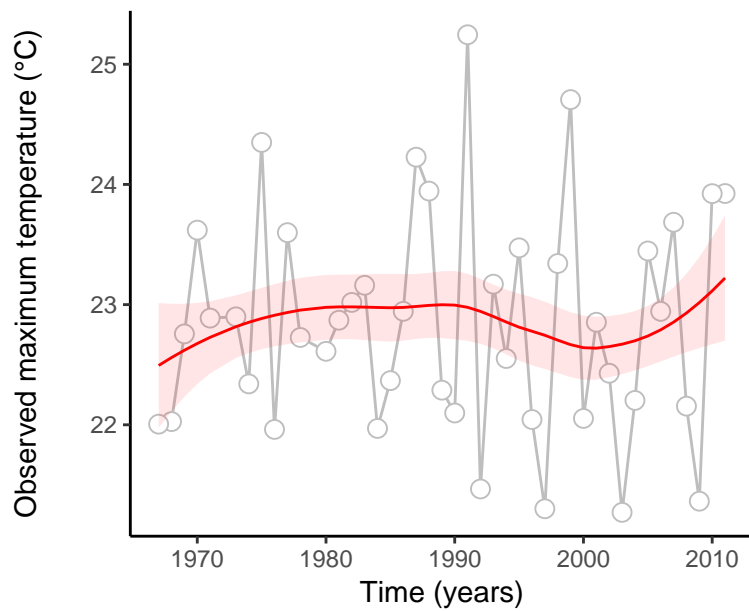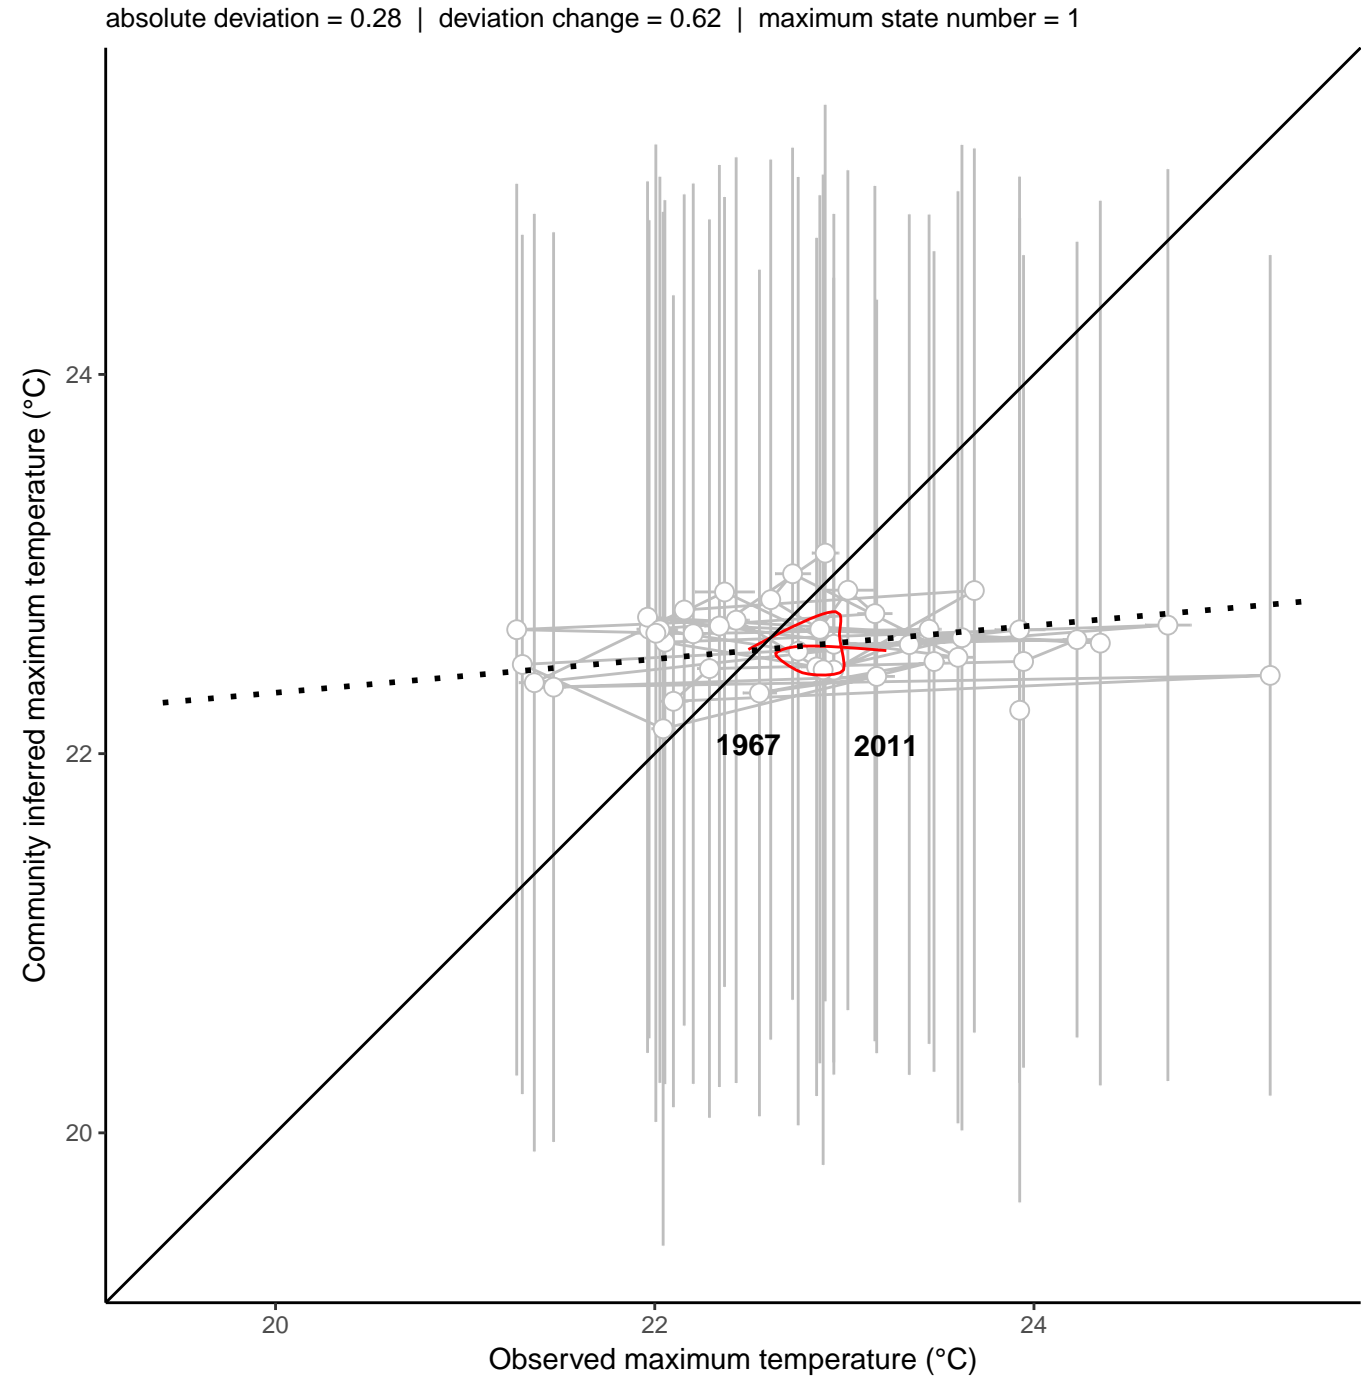

site : 840\_67\_1

absolute deviation = 3.6 | deviation change = 0.56 | maximum state number = 1

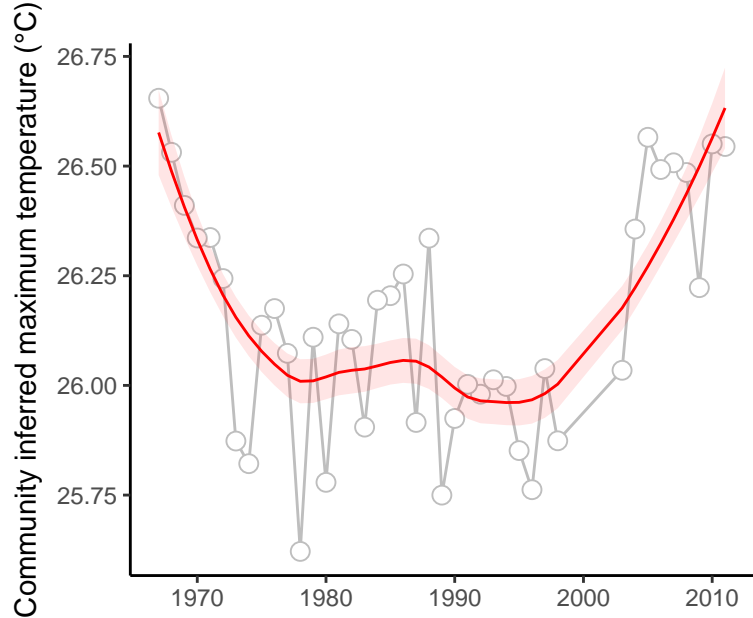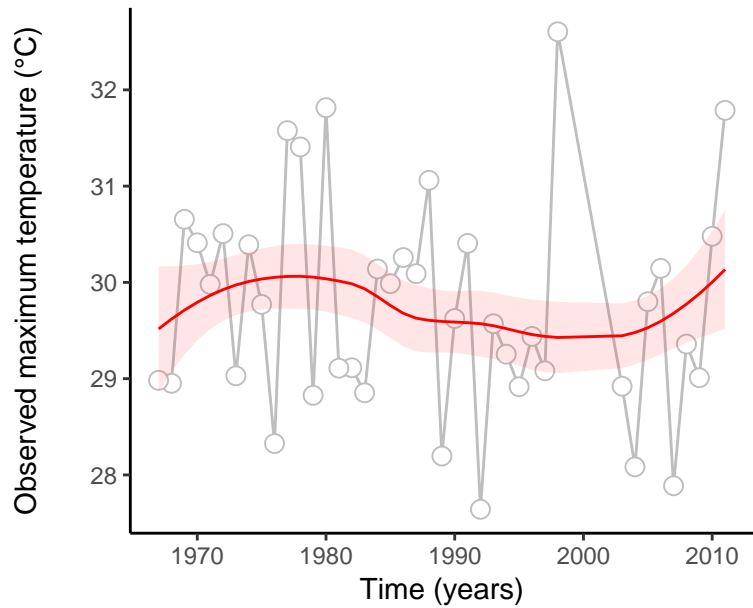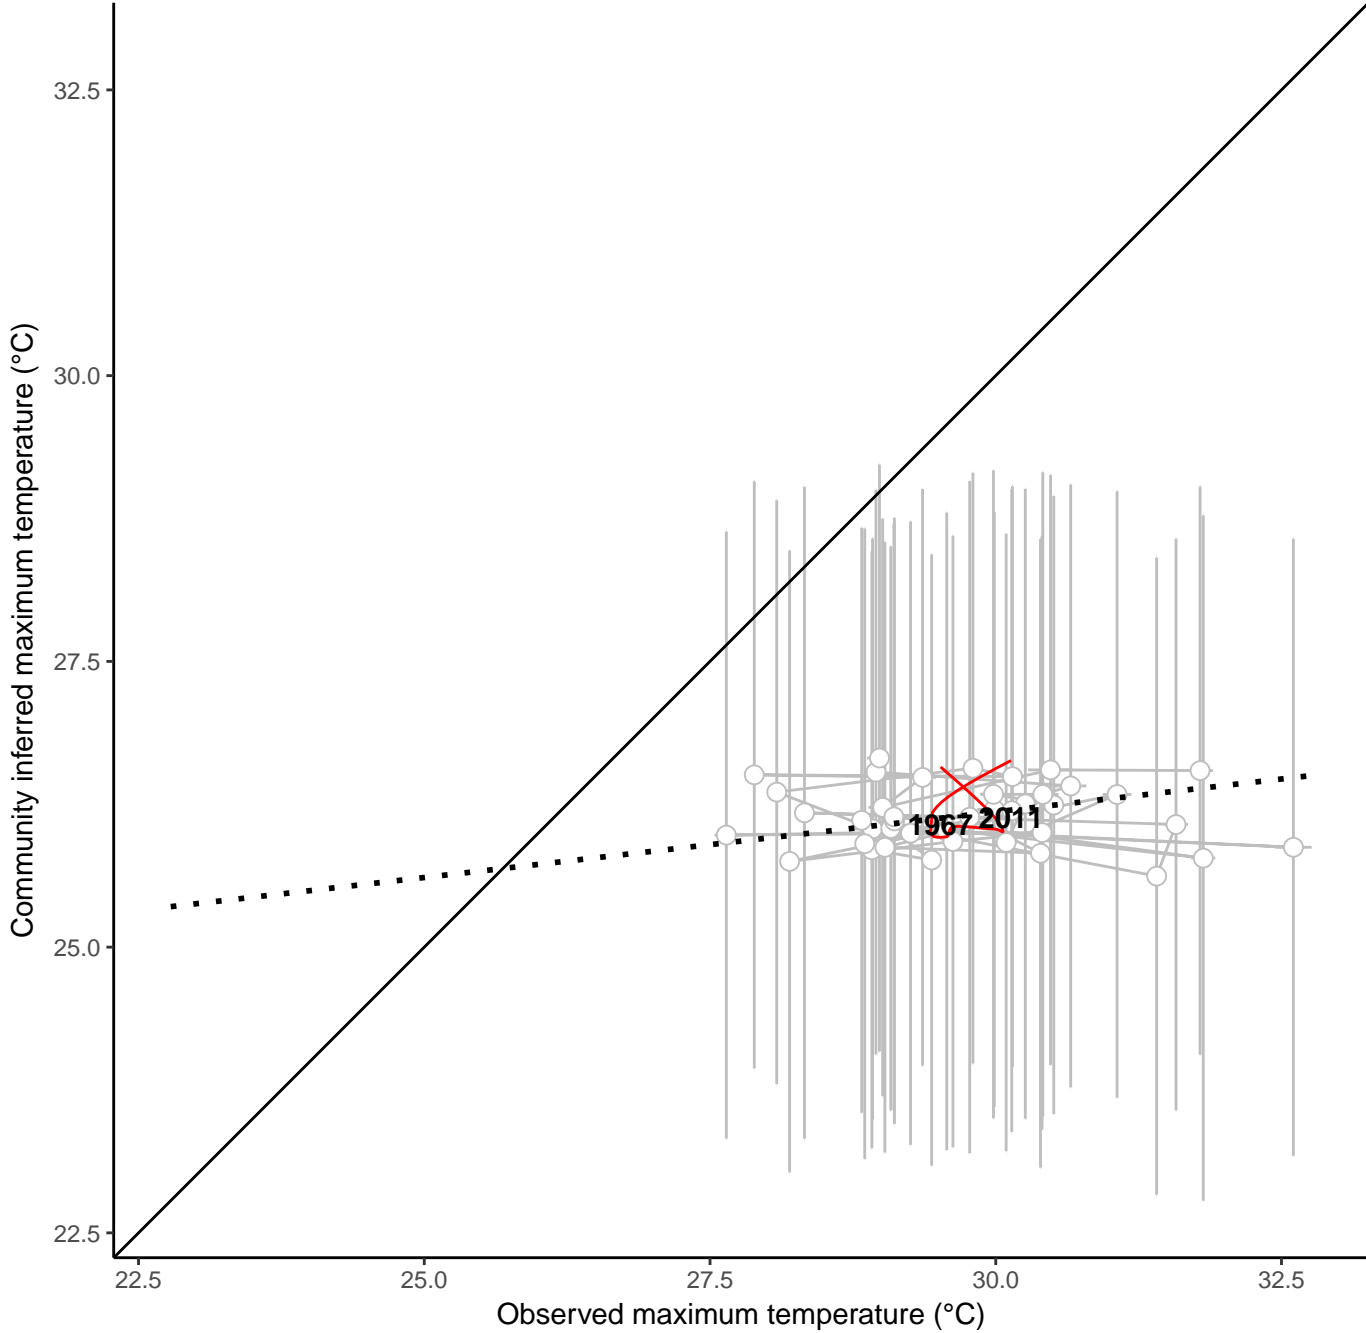

site : 840\_7\_6

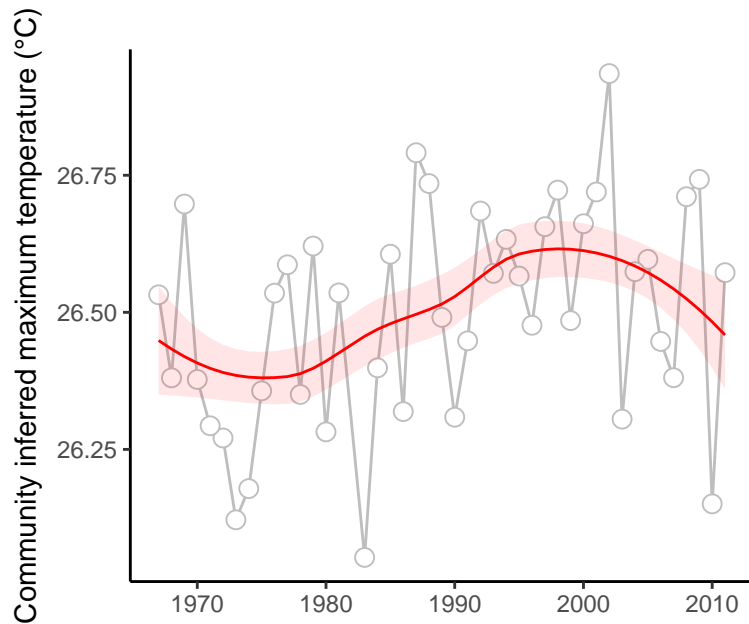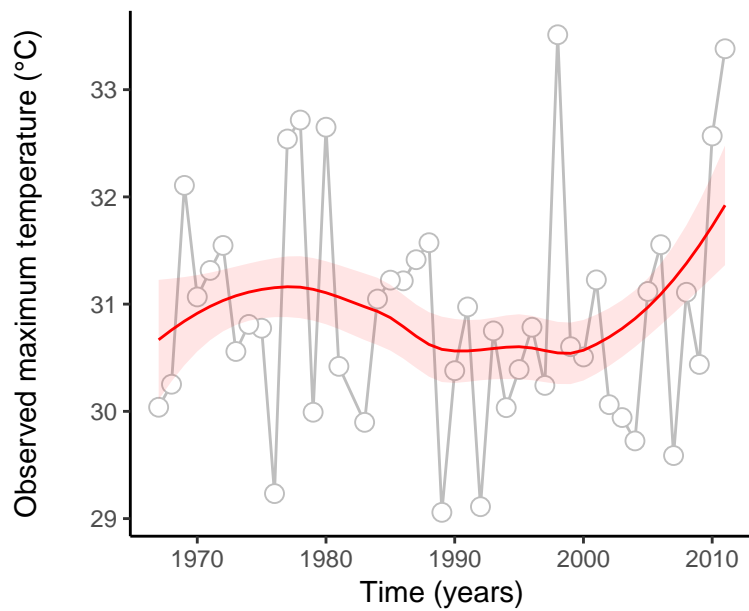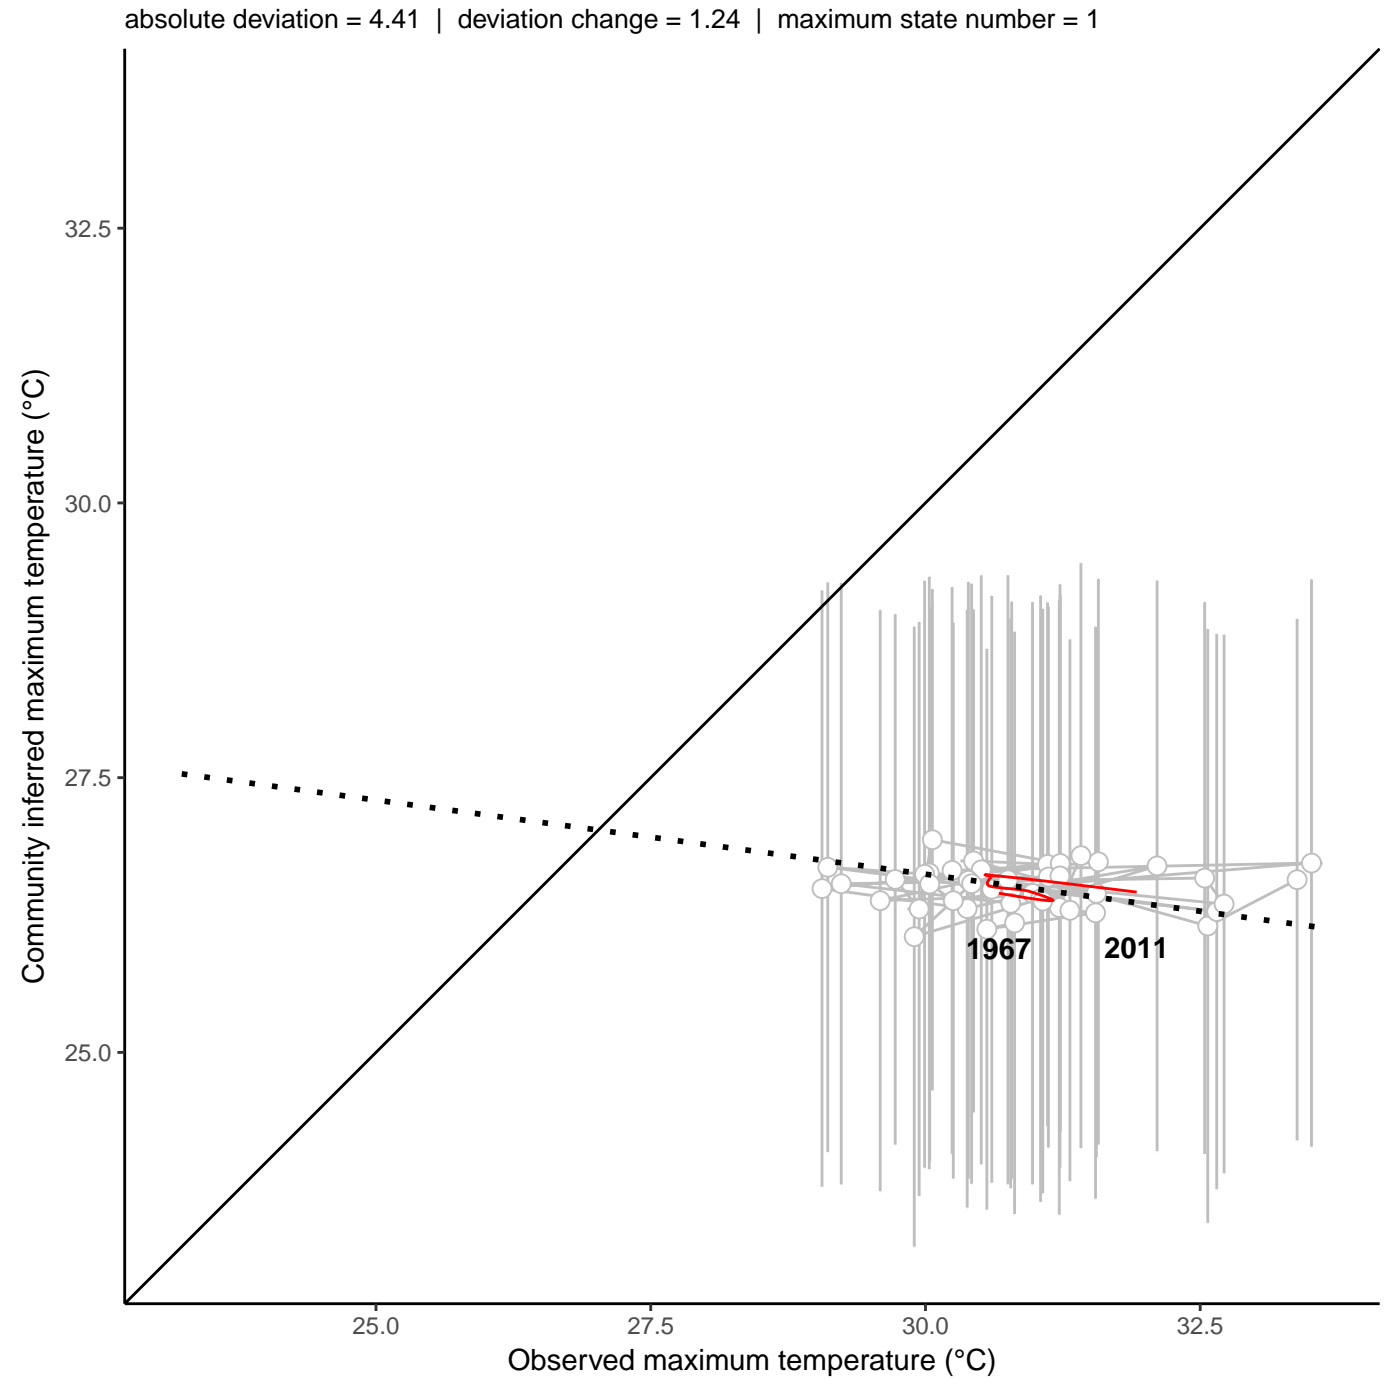

site : 840\_83\_64

absolute deviation = 5.16 | deviation change = 1.89 | maximum state number = 1

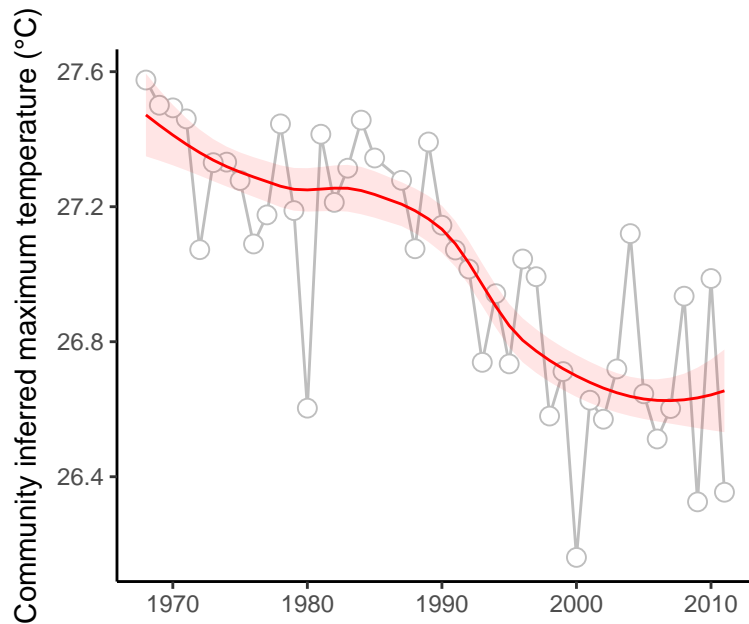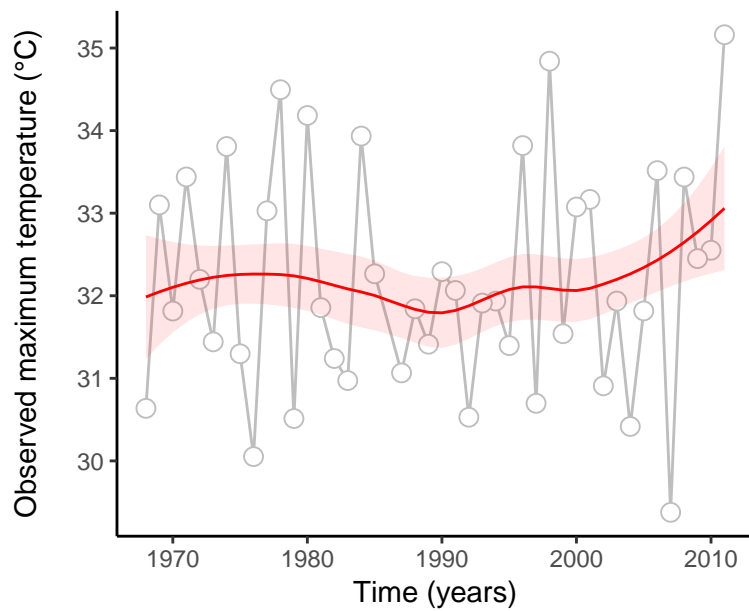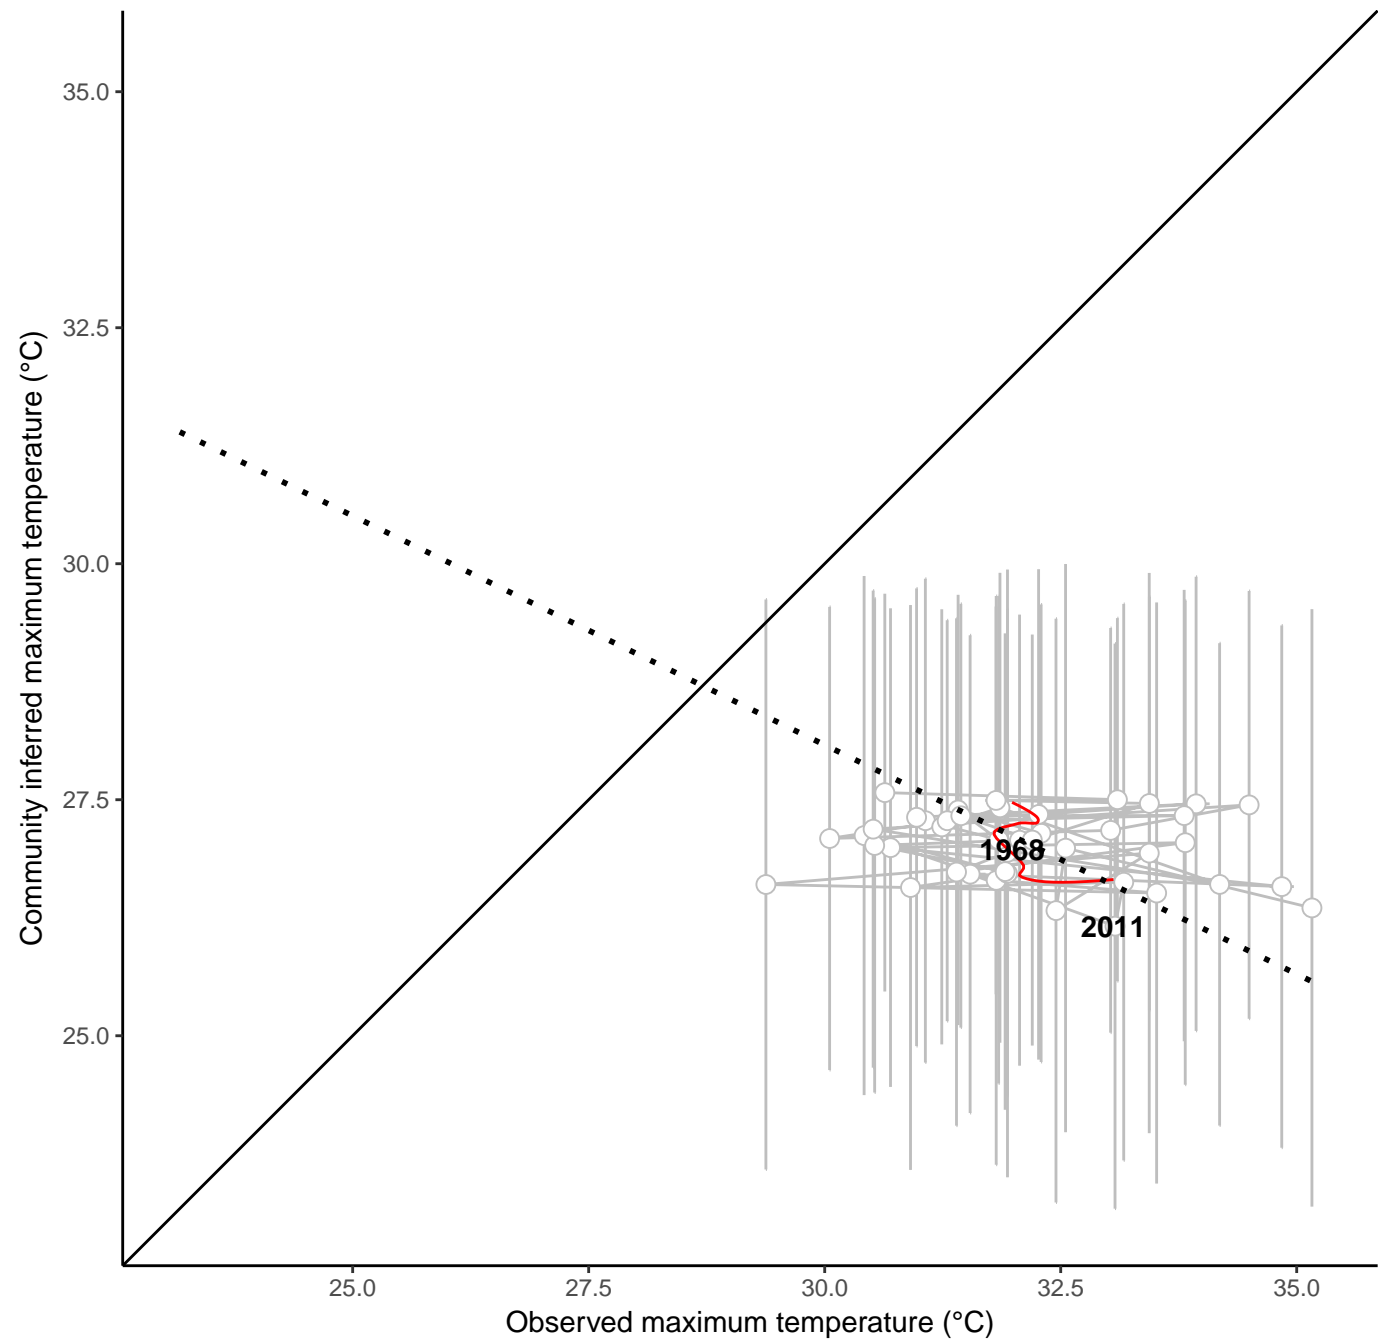

site : 840\_89\_4

absolute deviation = 4.74 | deviation change = 0.48 | maximum state number = 1

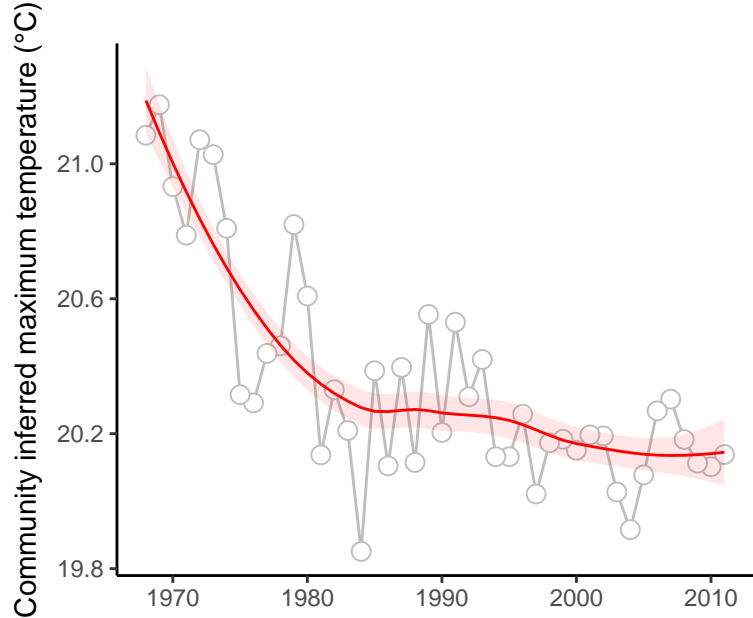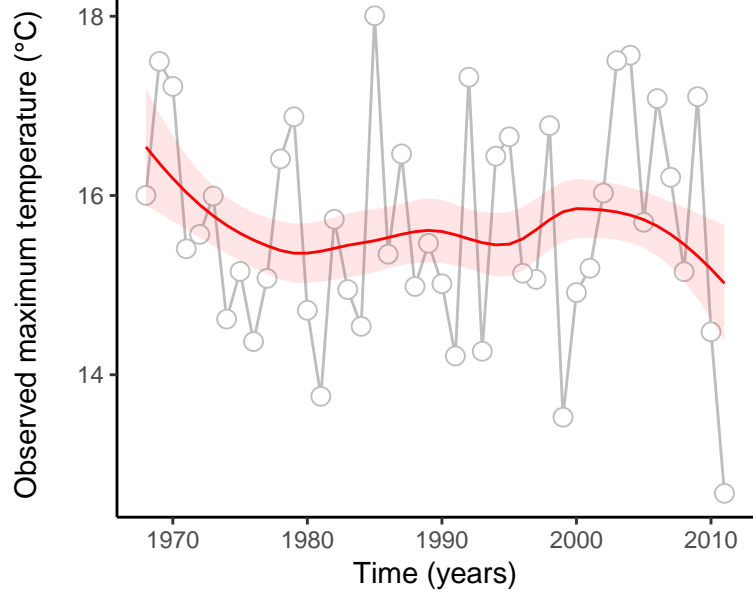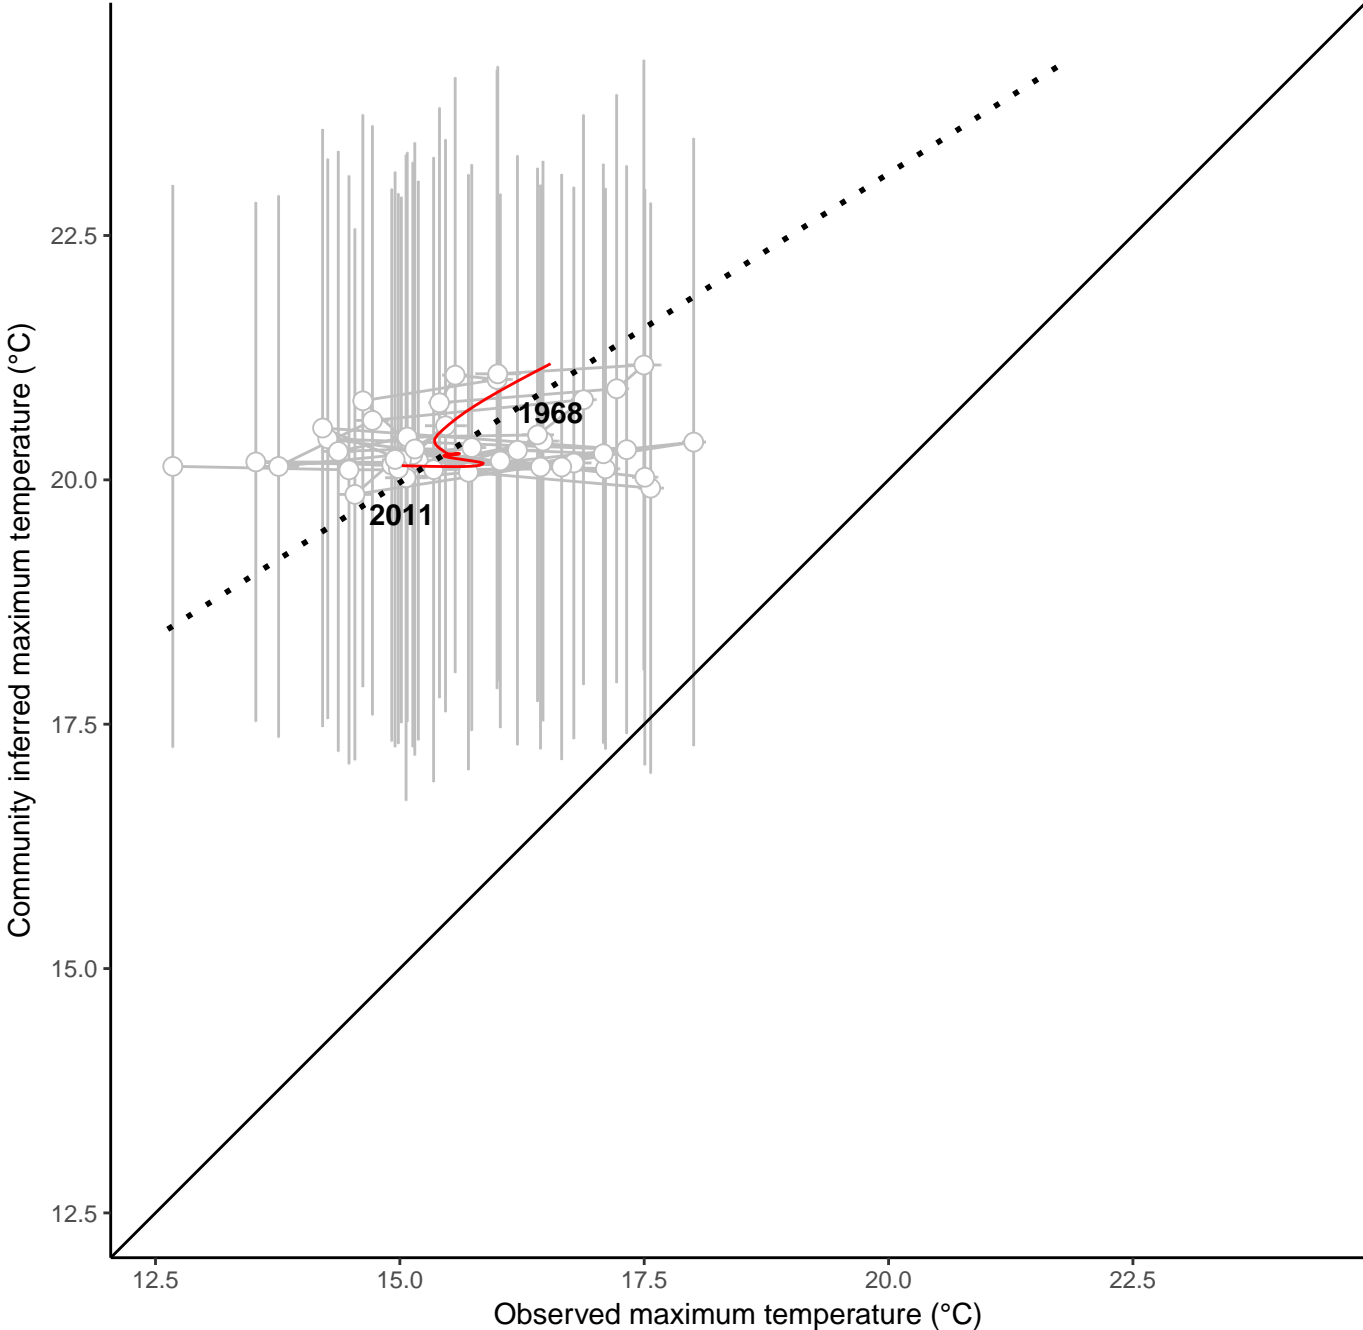

site : 840\_91\_41

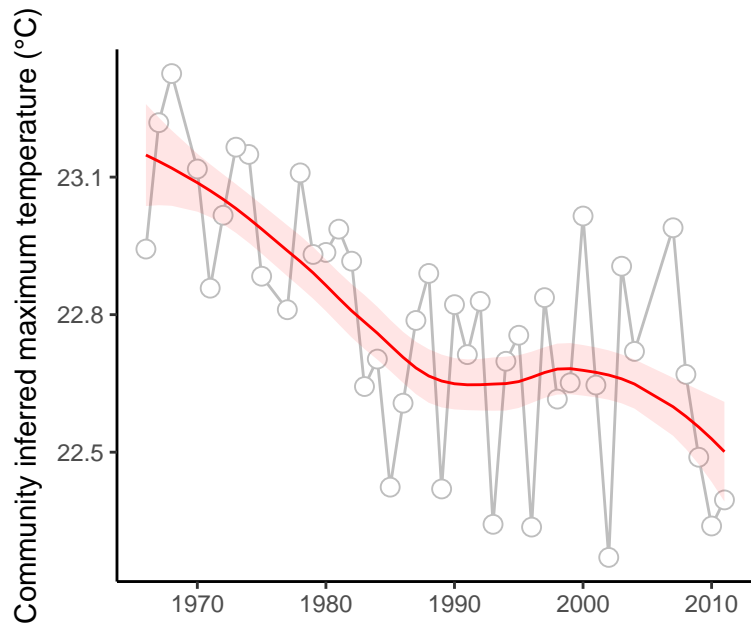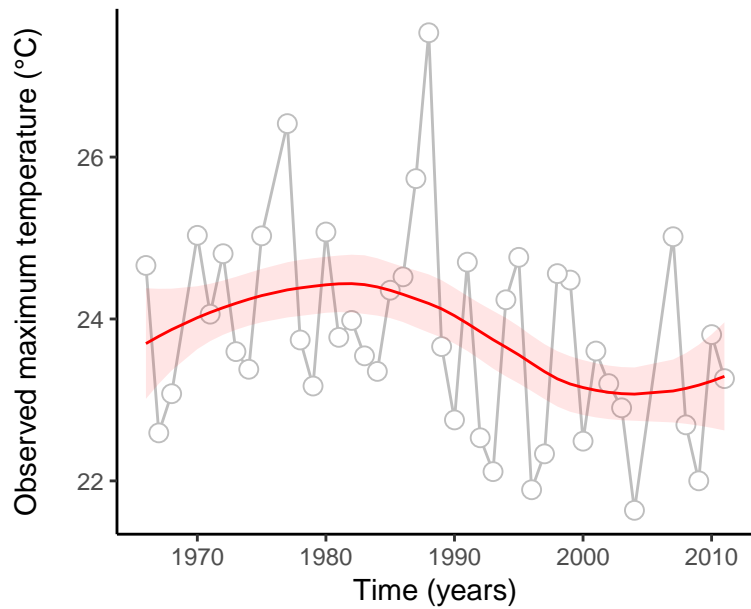

absolute deviation = 1.04 | deviation change = 0.24 | maximum state number = 1

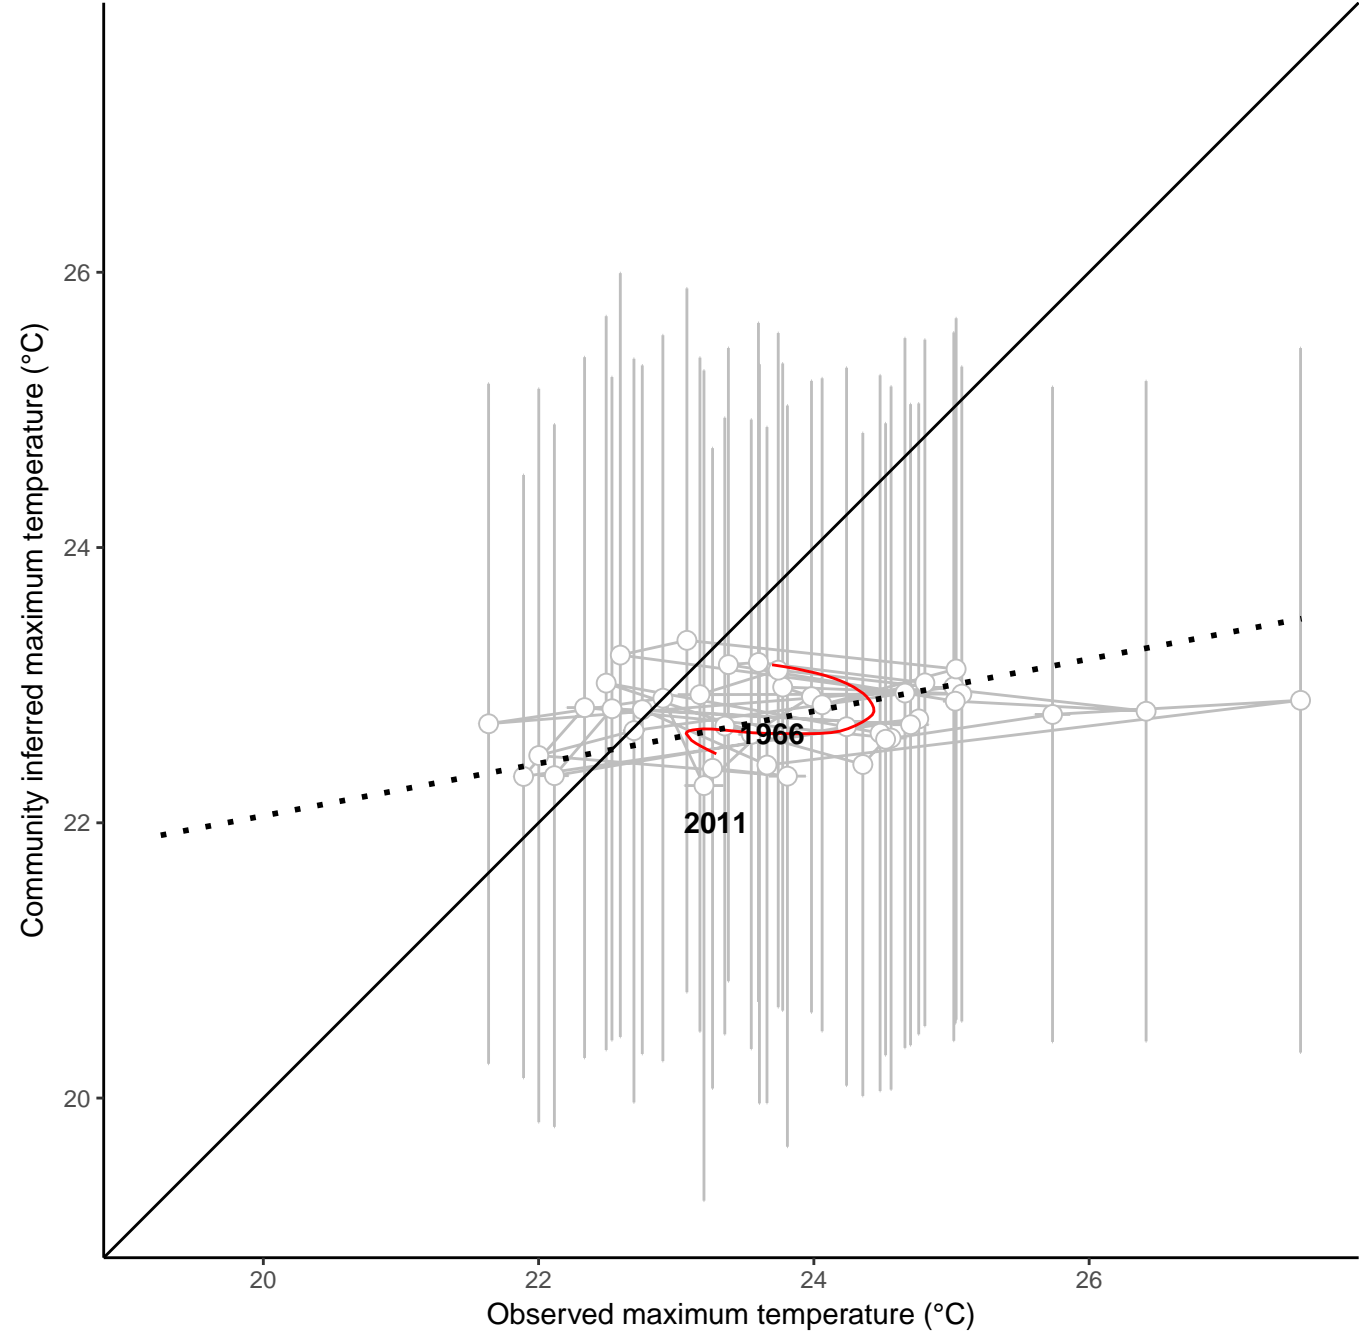

site : 840\_27\_7

absolute deviation = 5.38 | deviation change = 1.33 | maximum state number = 1

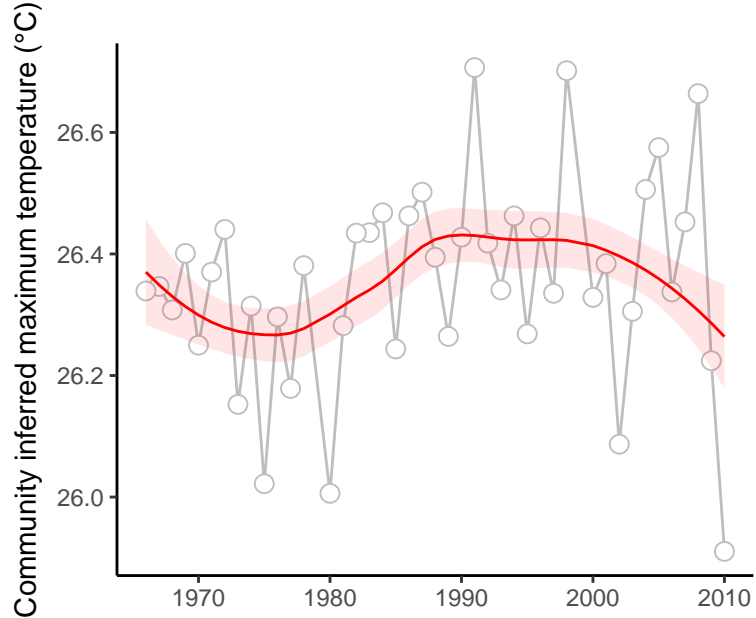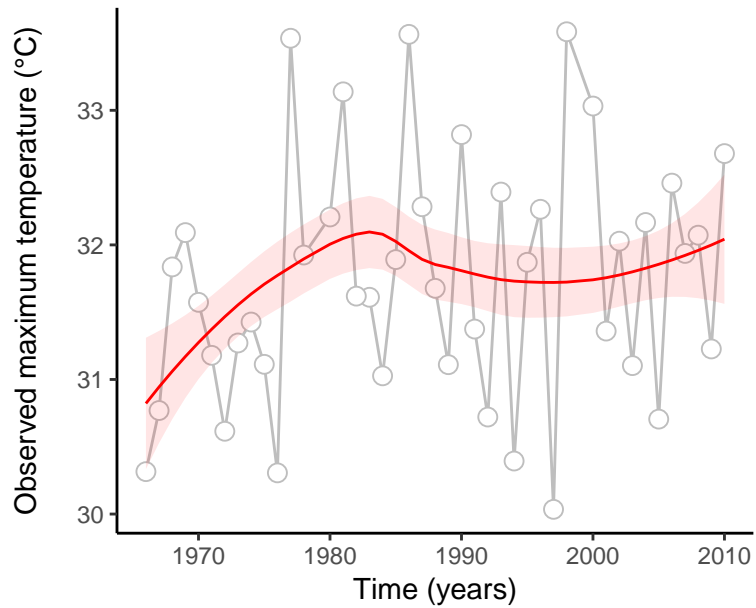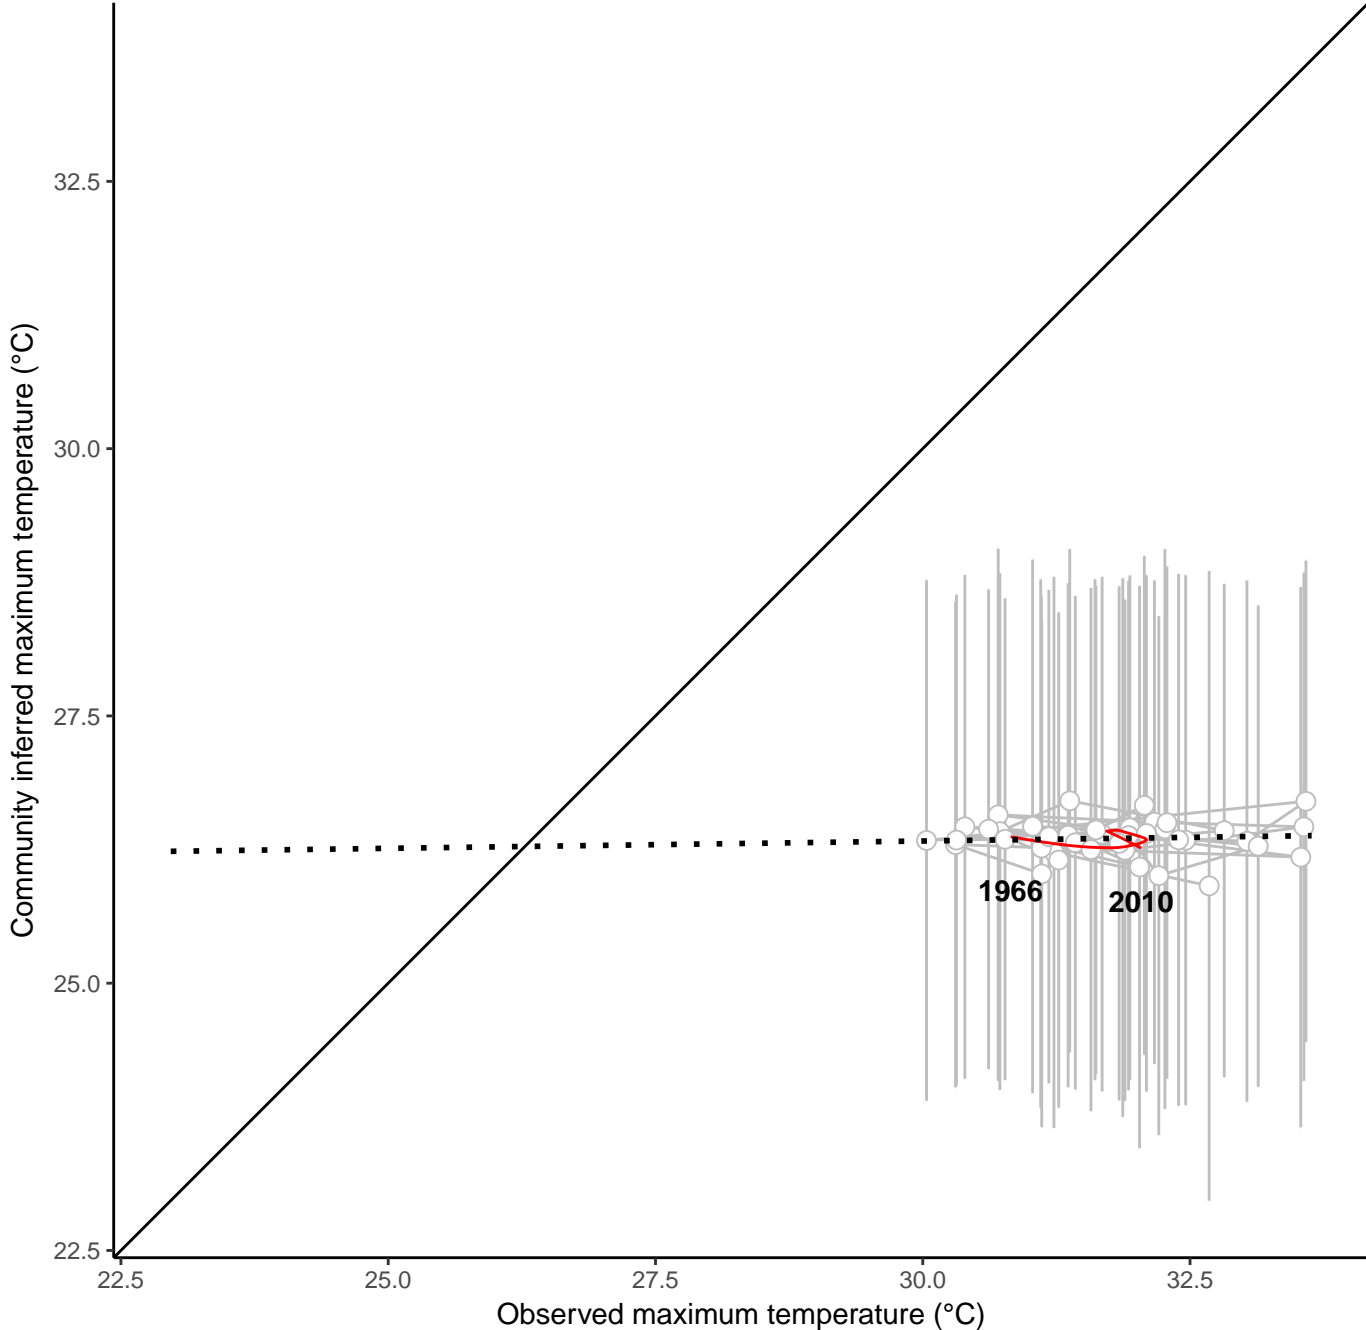

site : 840\_46\_31

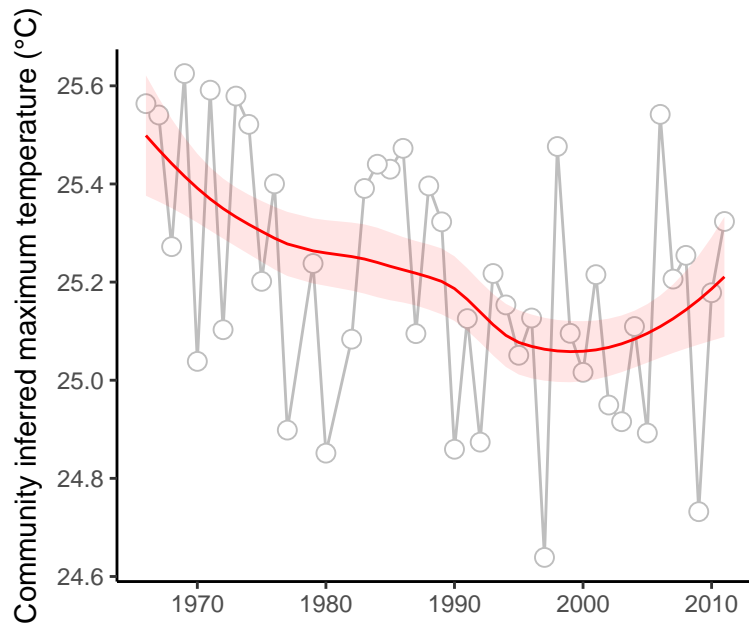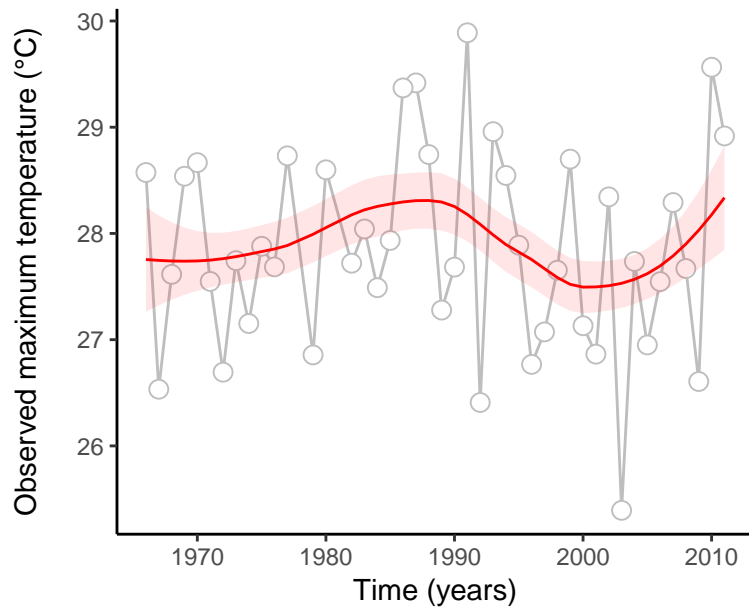

absolute deviation = 2.69 | deviation change = 0.87 | maximum state number = 1

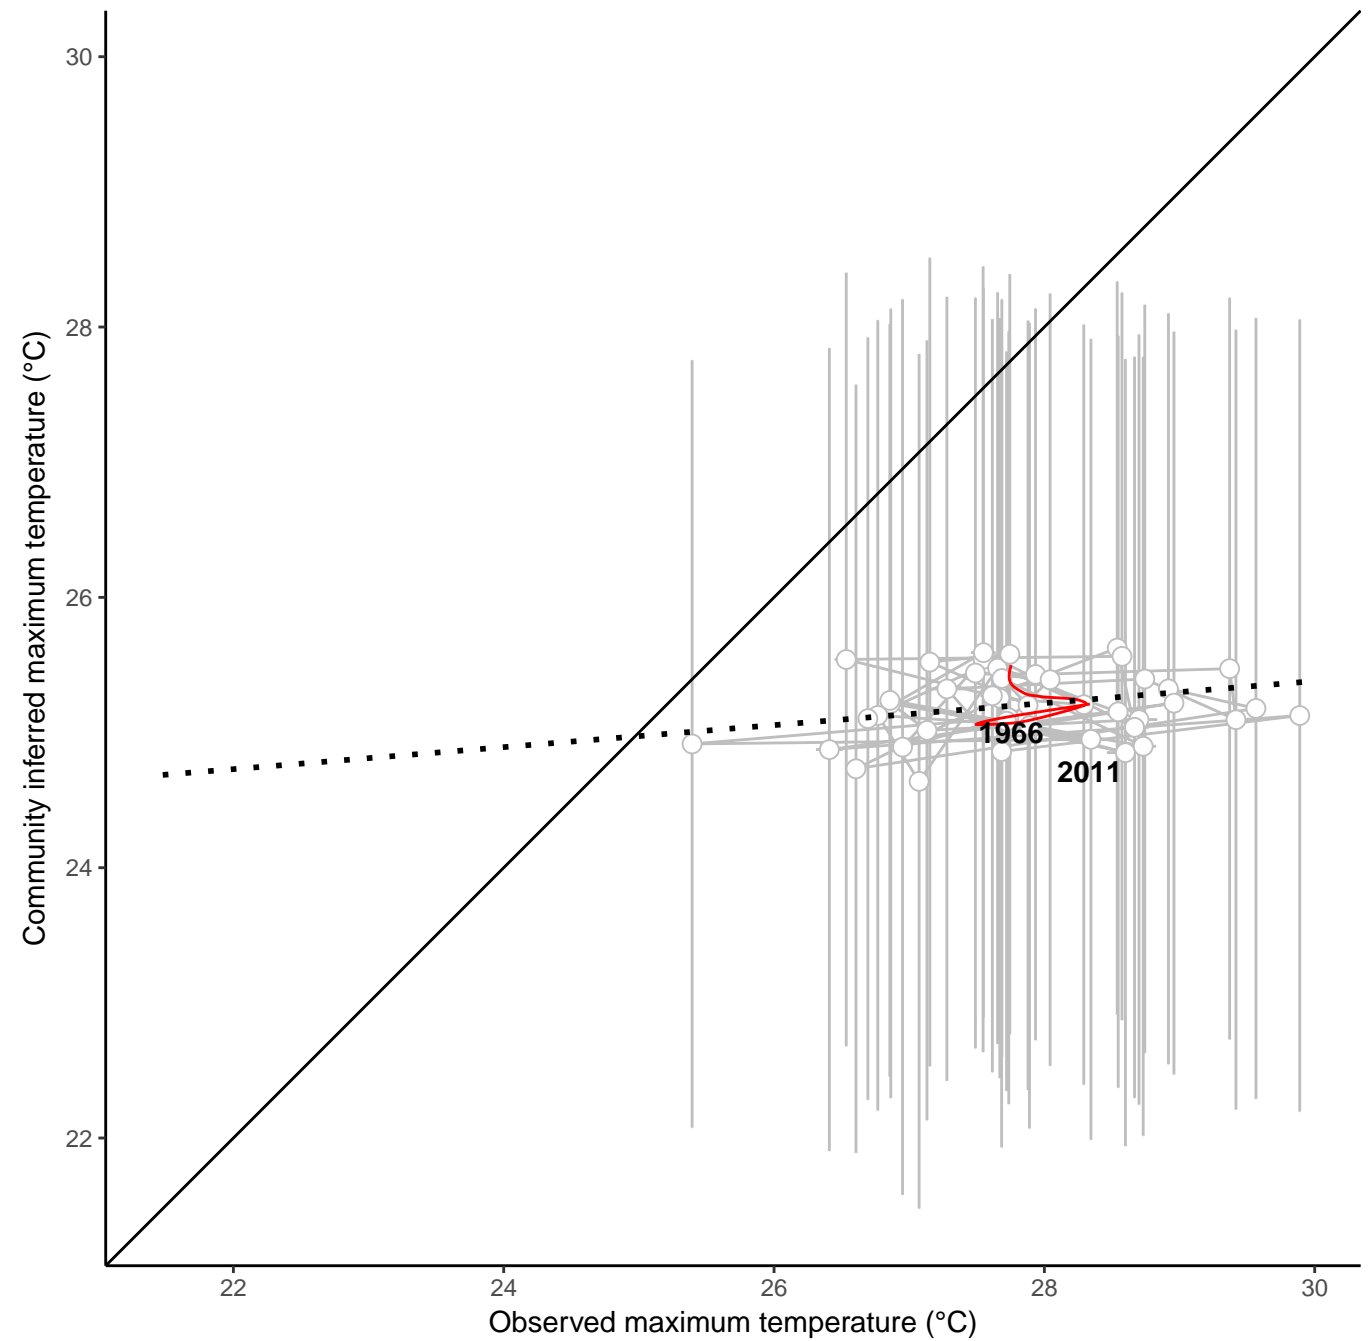



site : 840\_63\_23

absolute deviation = 3.56 | deviation change = 2.29 | maximum state number = 1

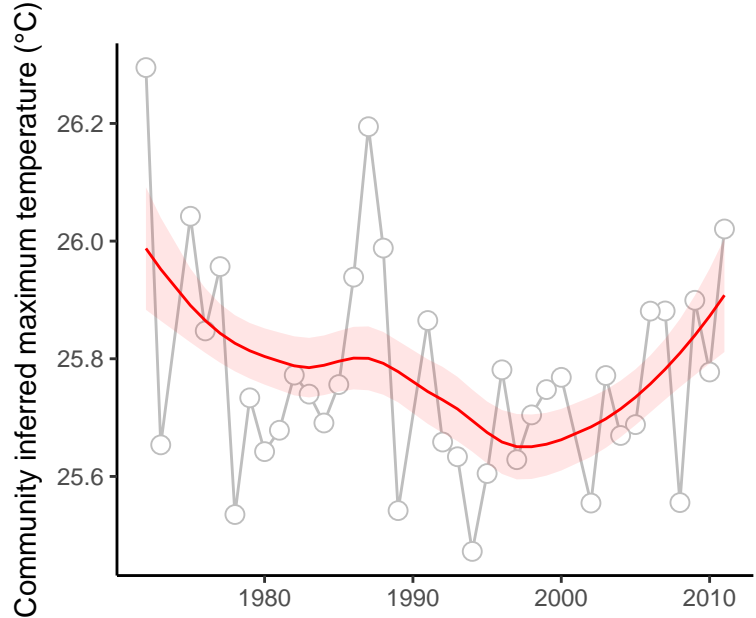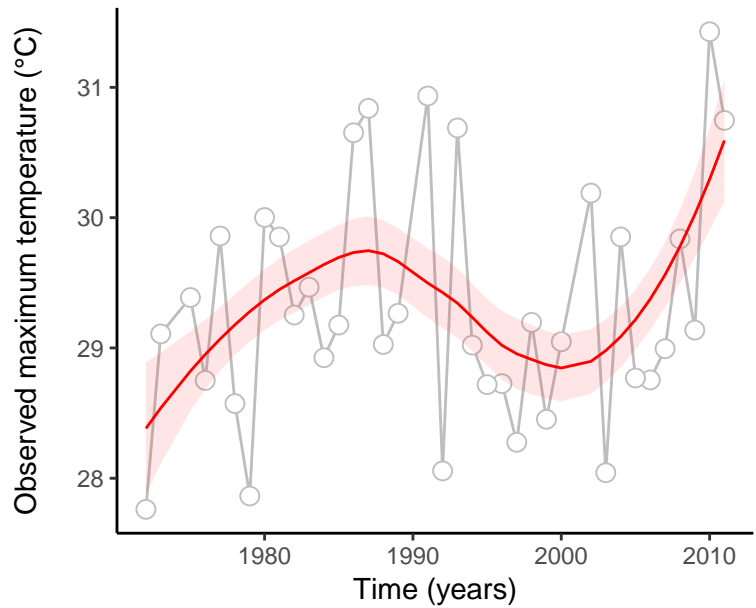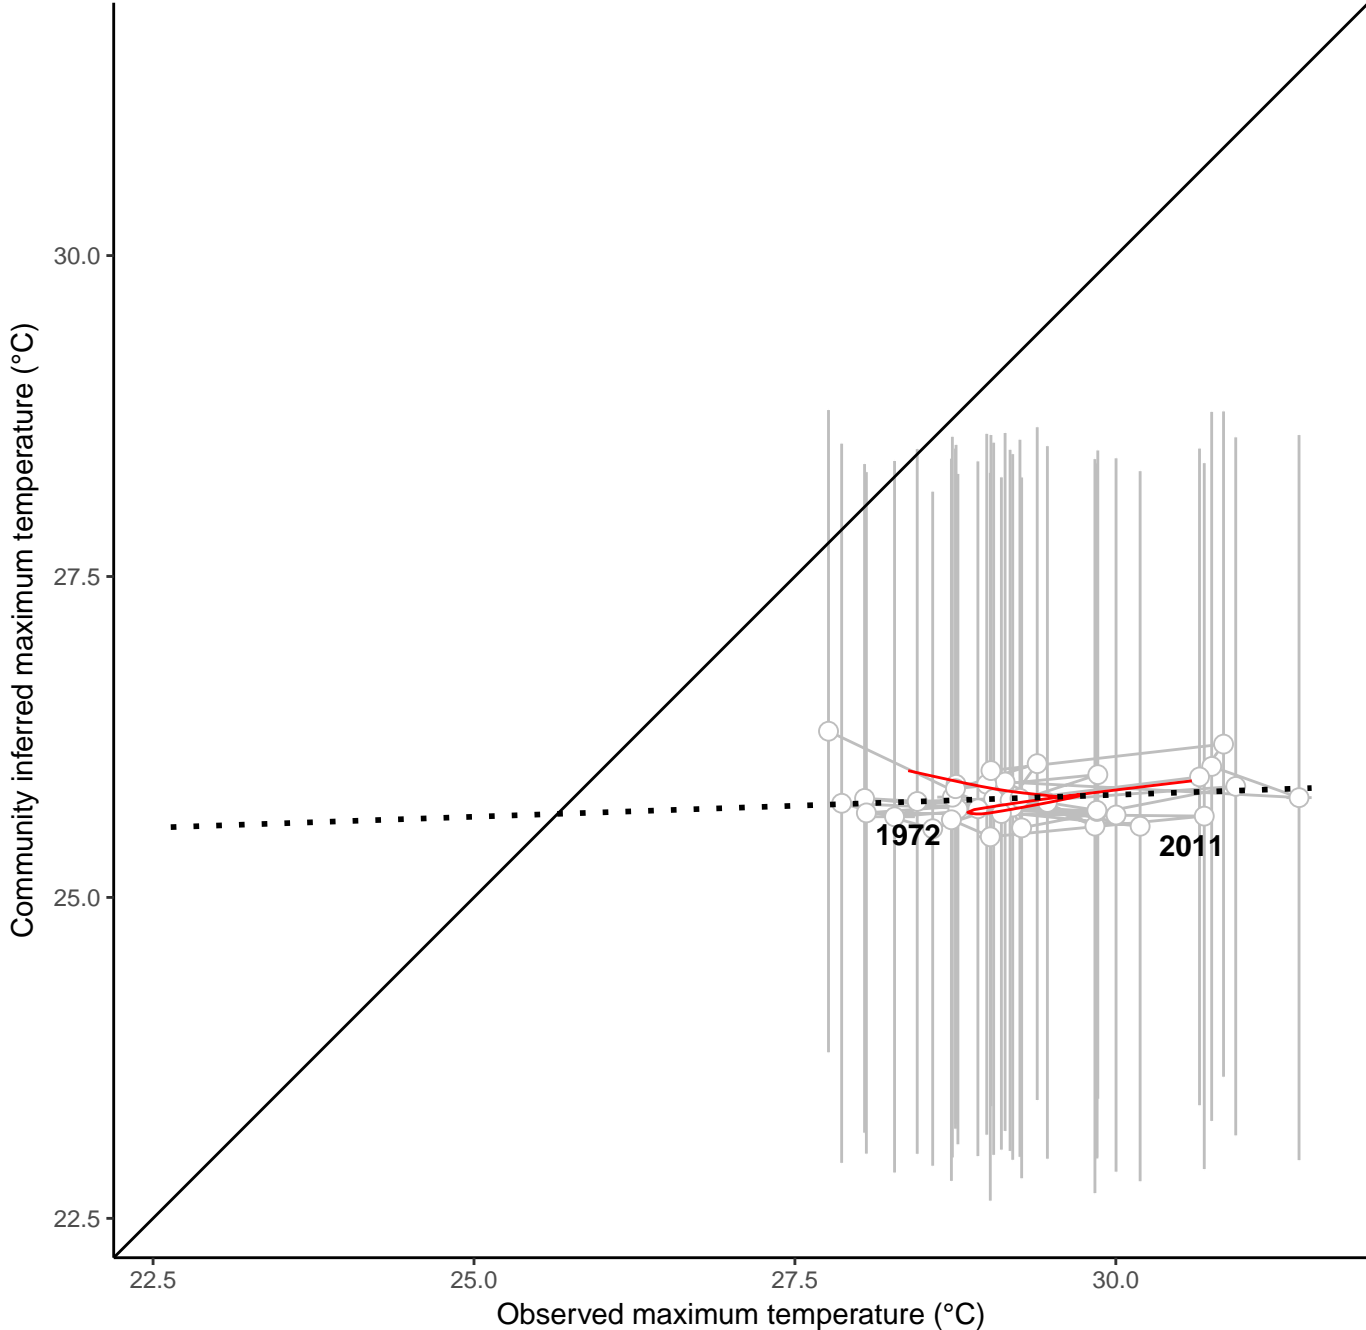

site : 840\_72\_10

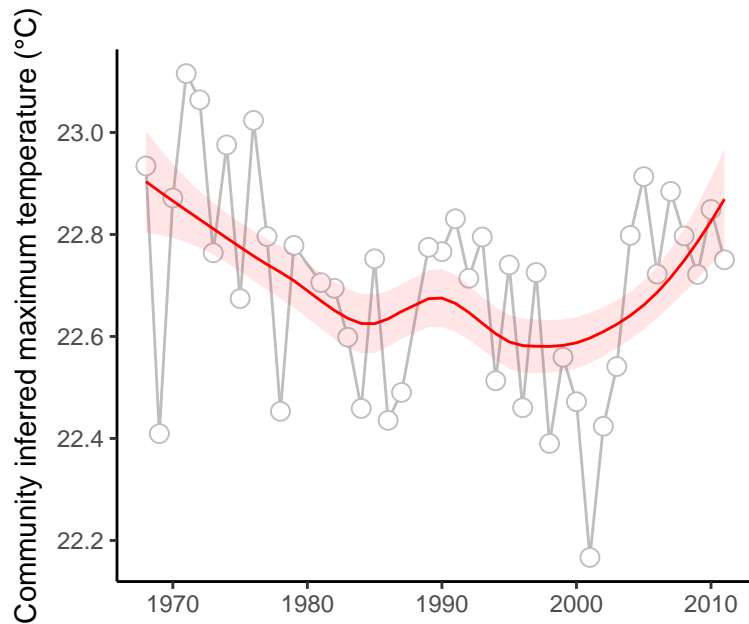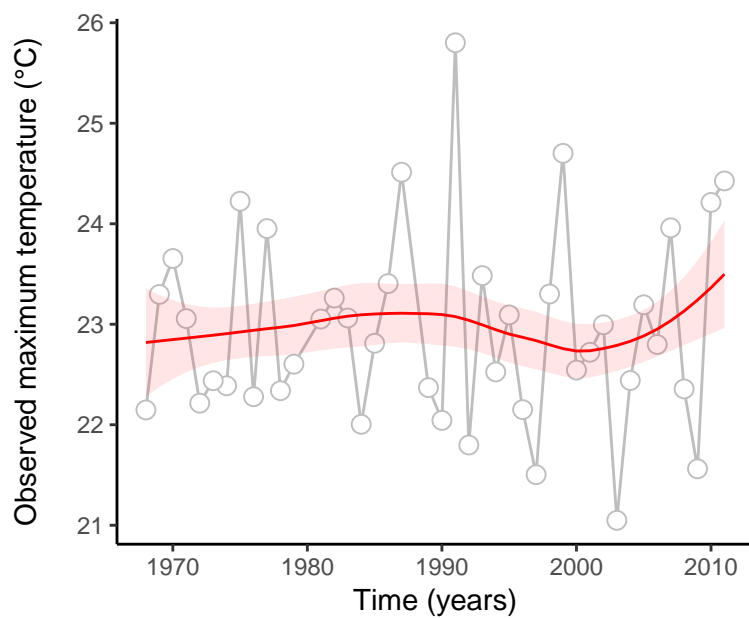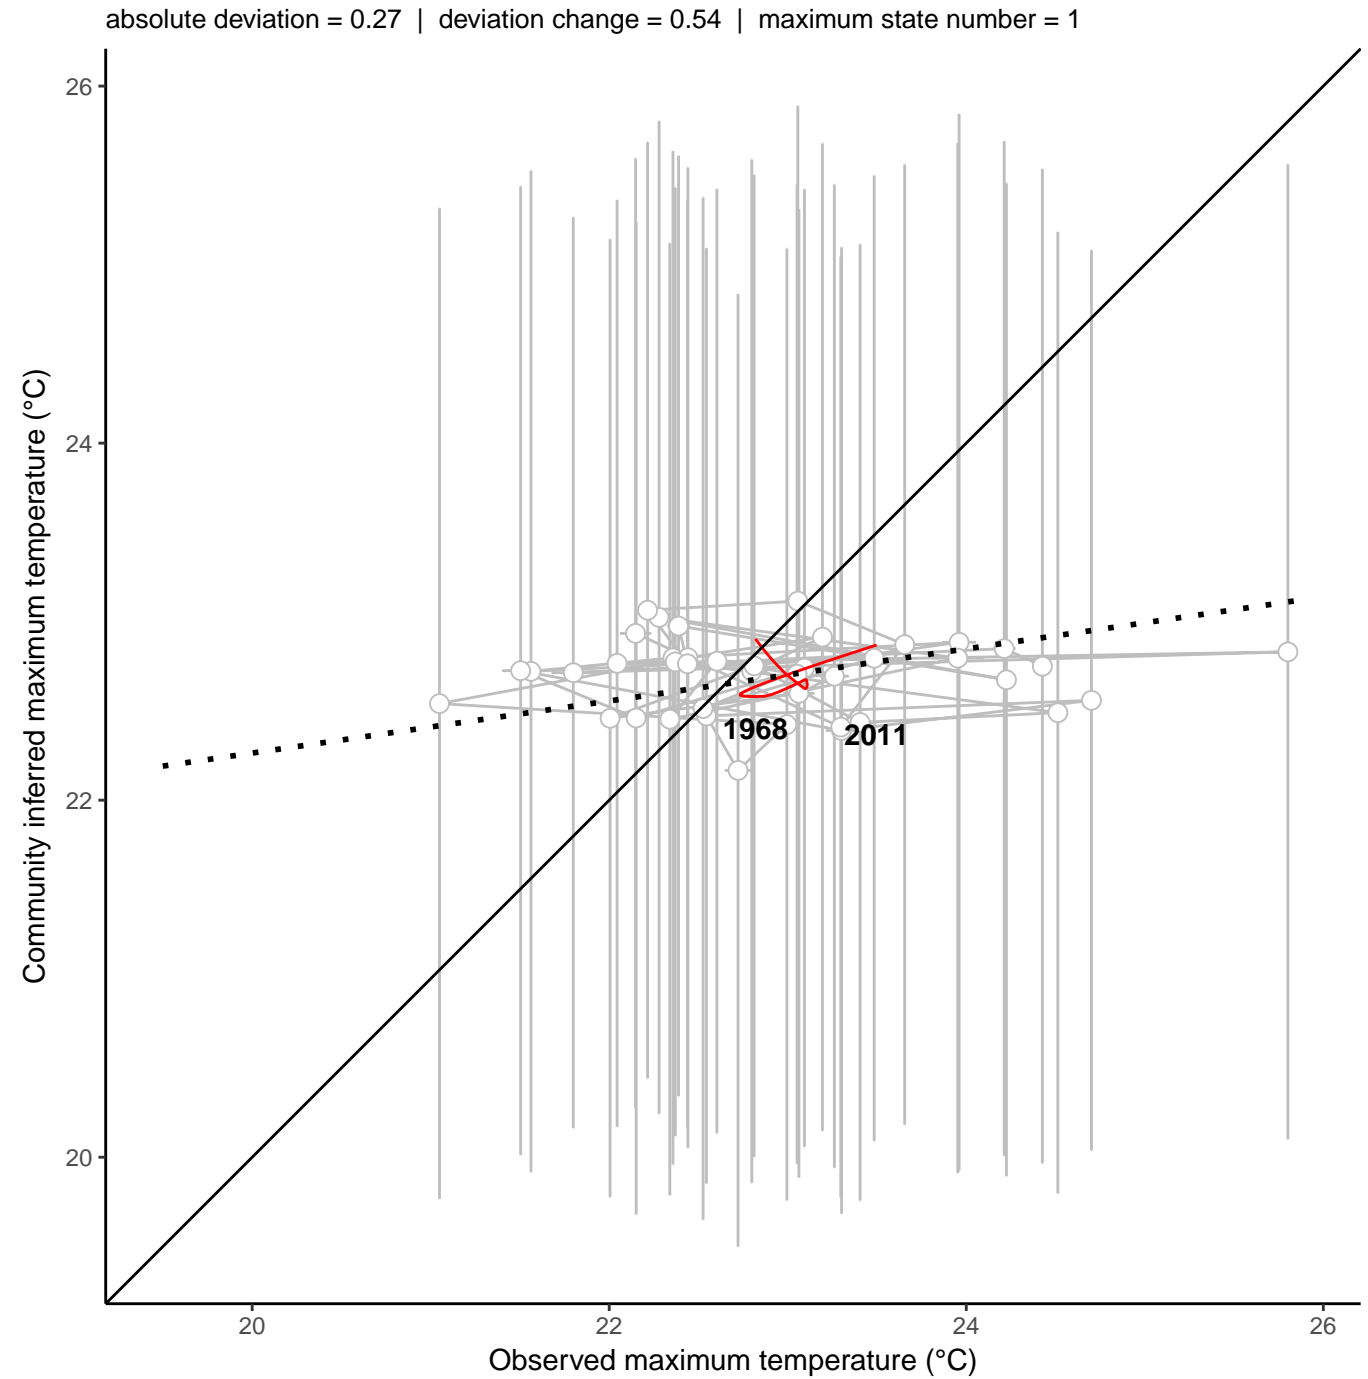

site : 840\_72\_44

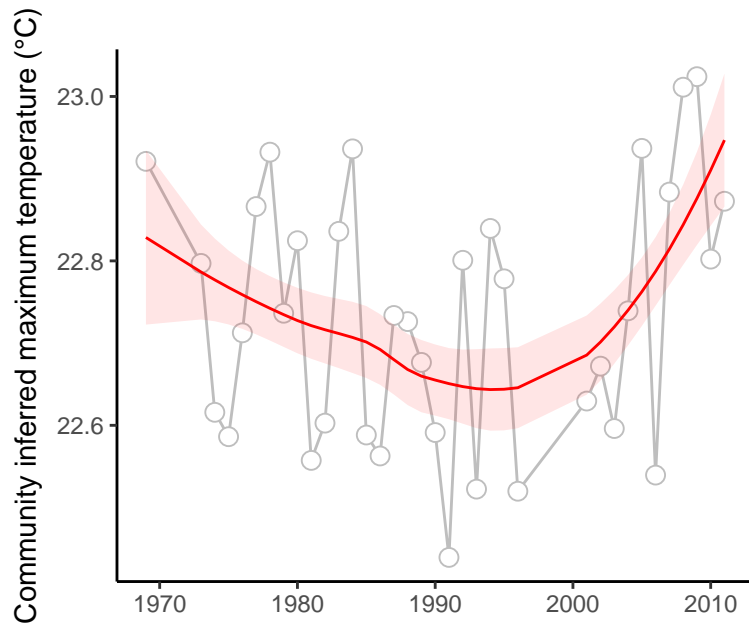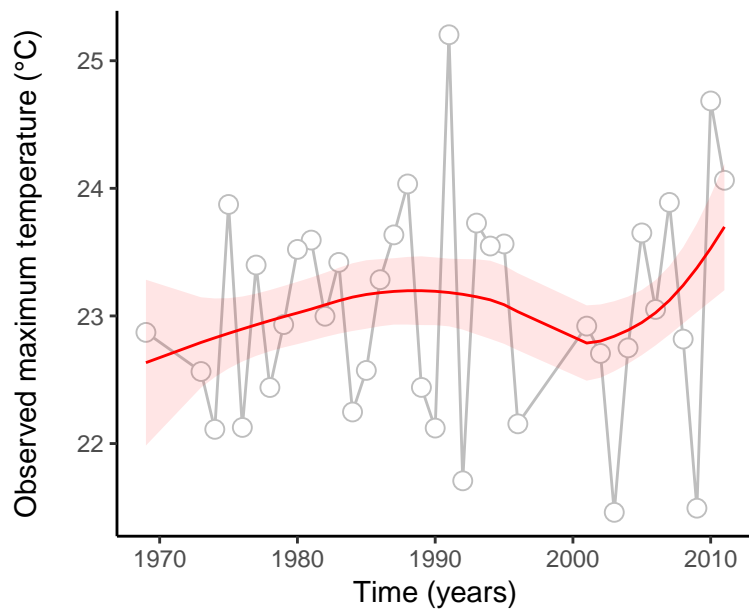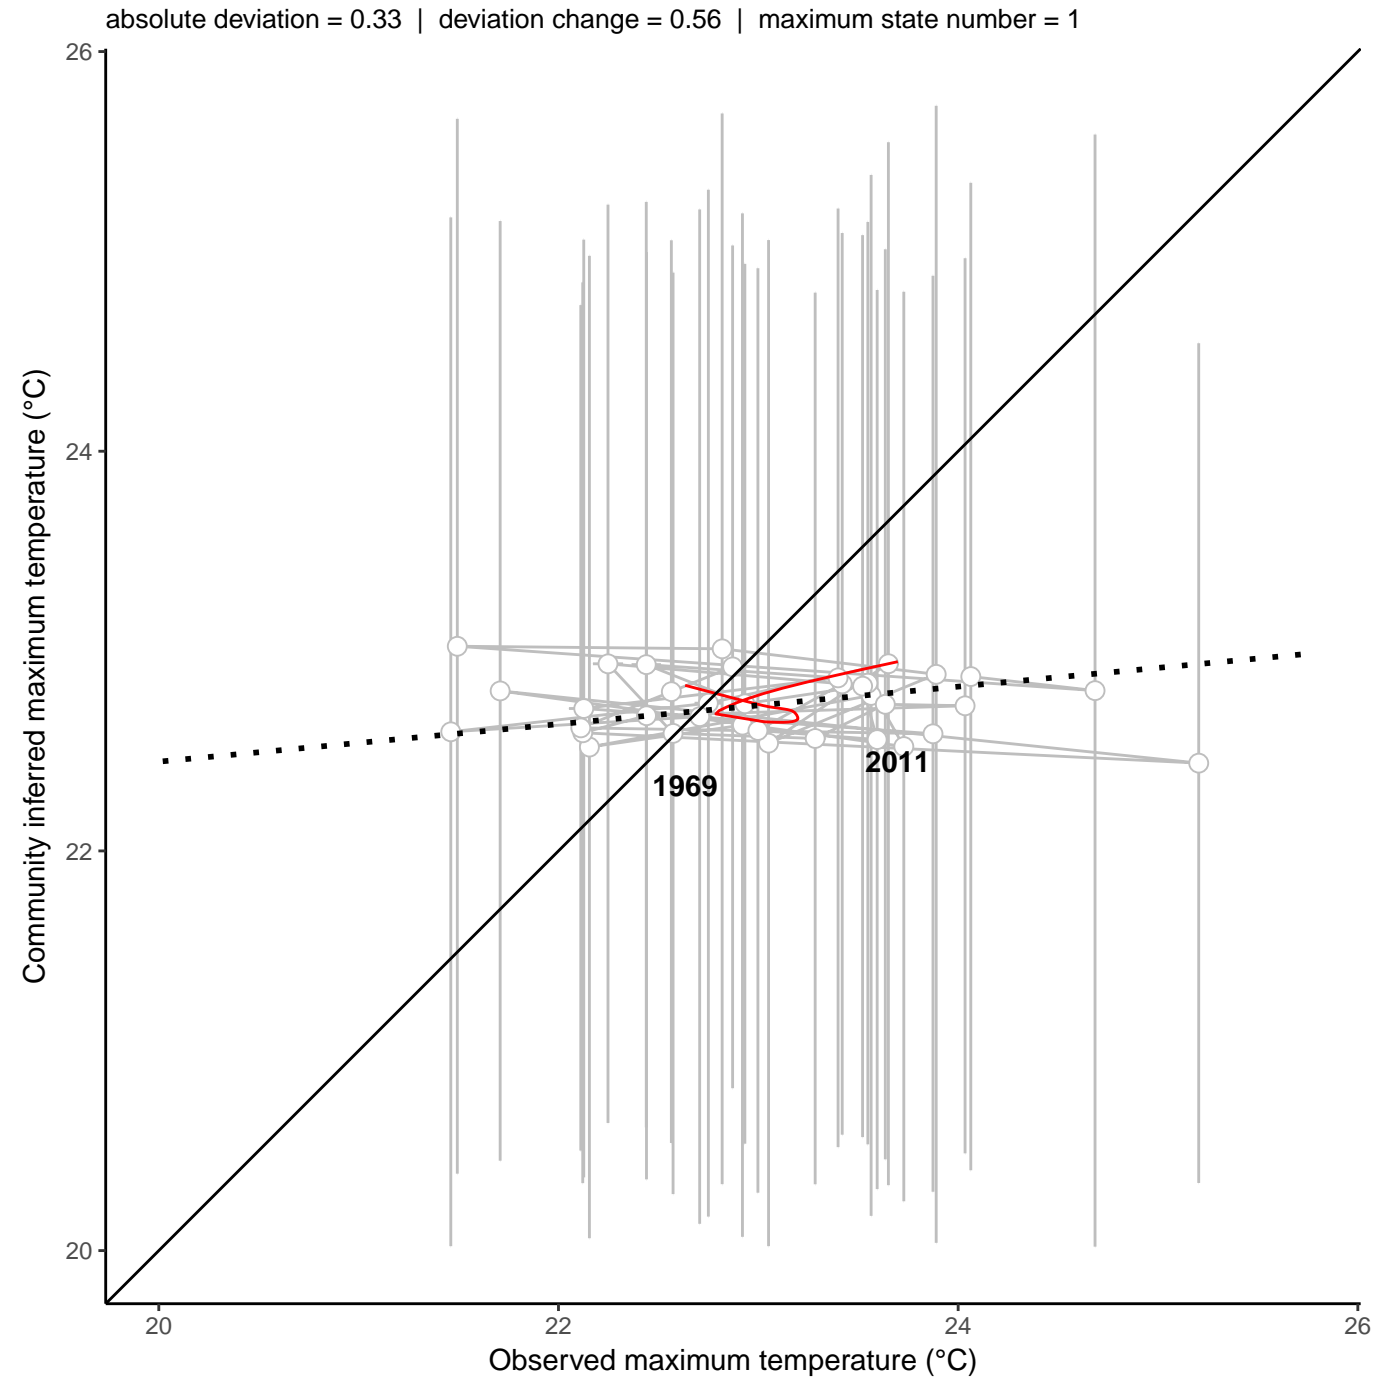

site : 840\_72\_54

absolute deviation = 1.19 | deviation change = 0.32 | maximum state number = 1

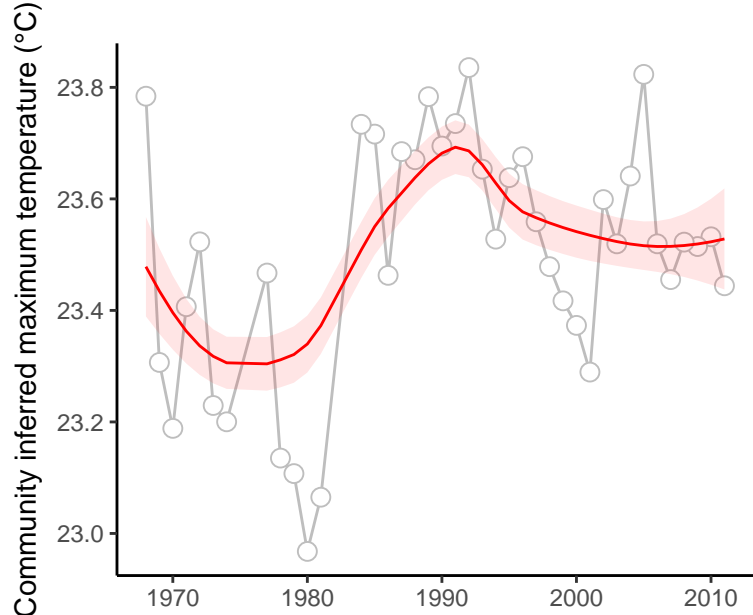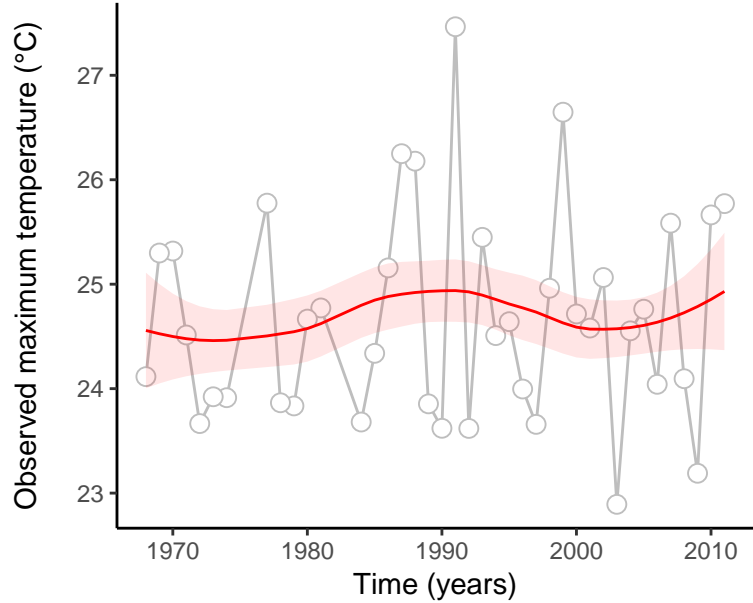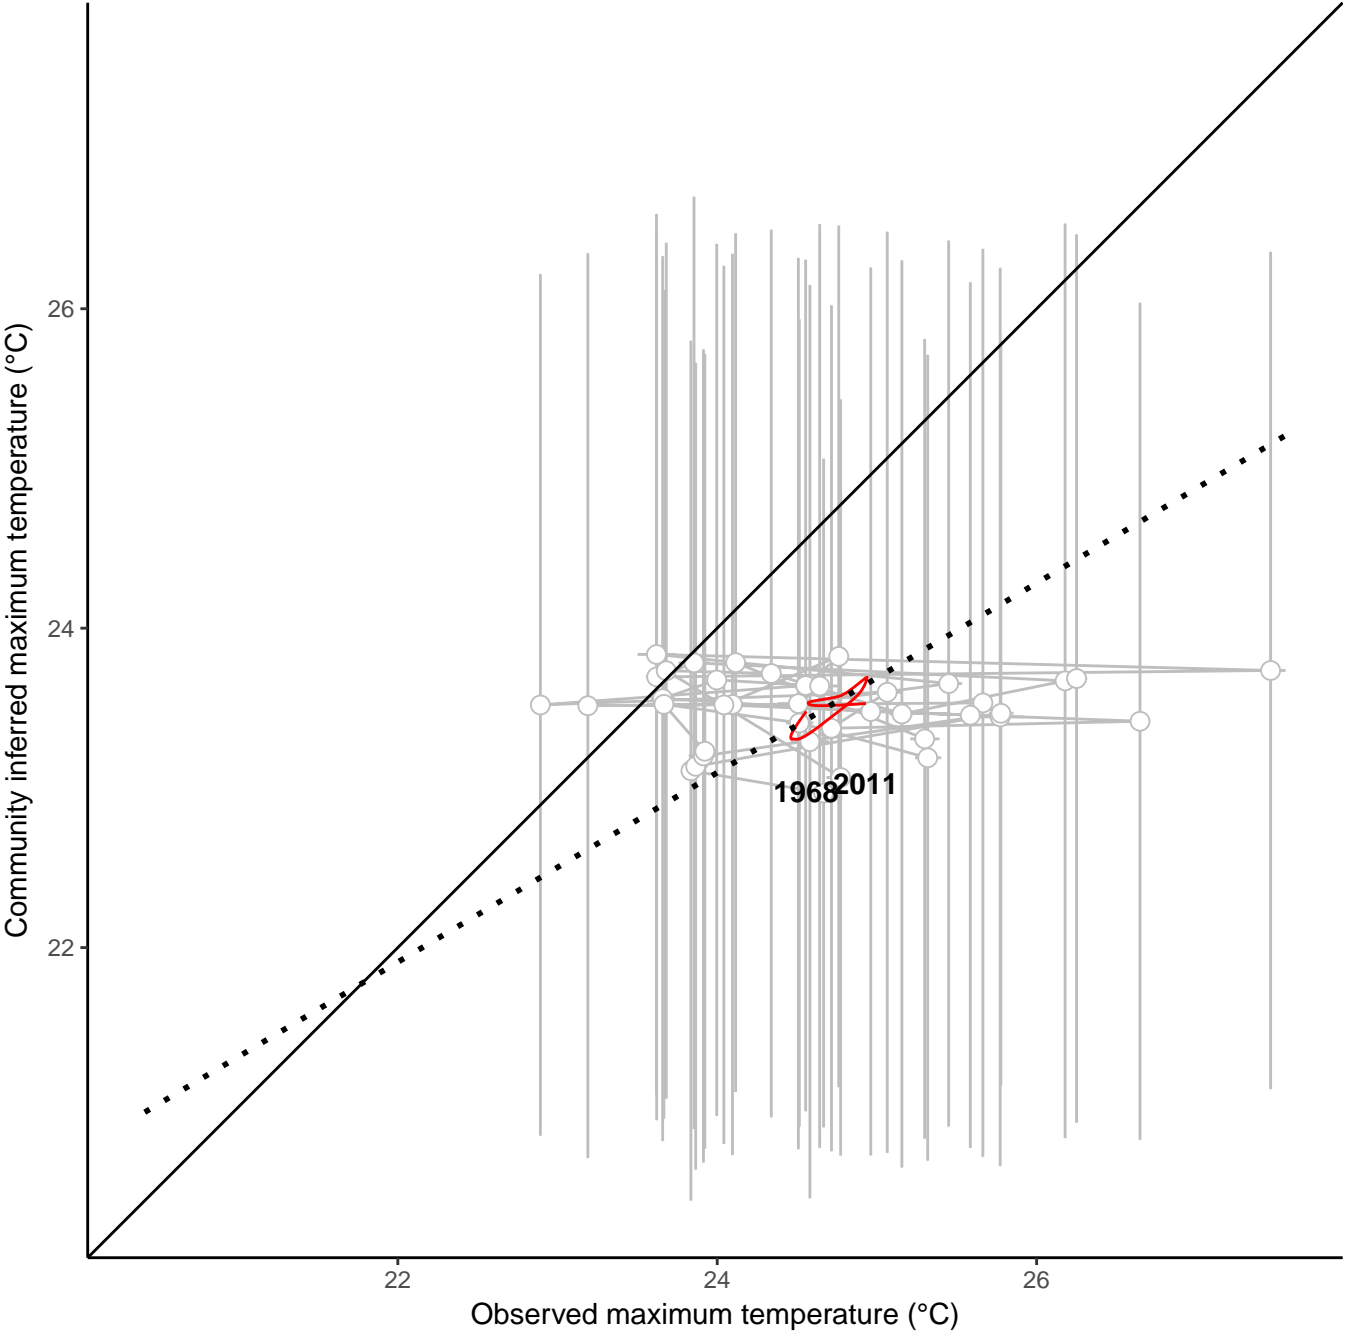

site : 840\_72\_6

absolute deviation = 0.28 | deviation change = 0.49 | maximum state number = 2

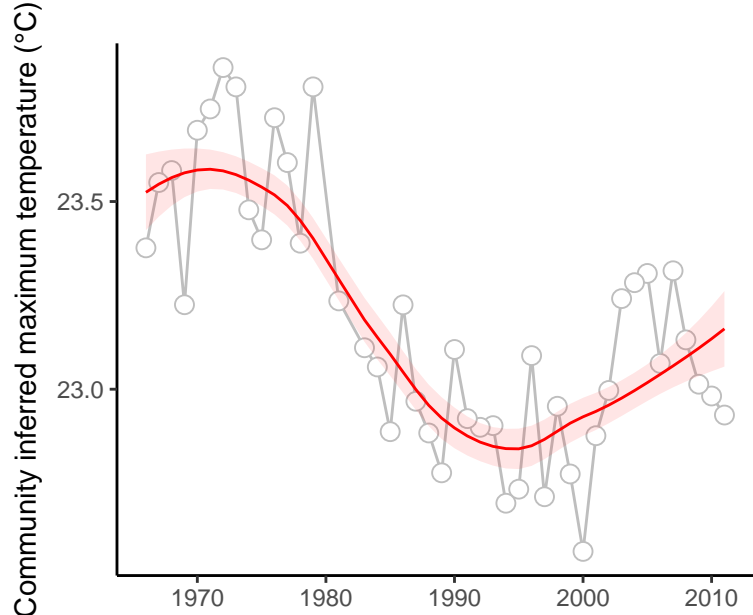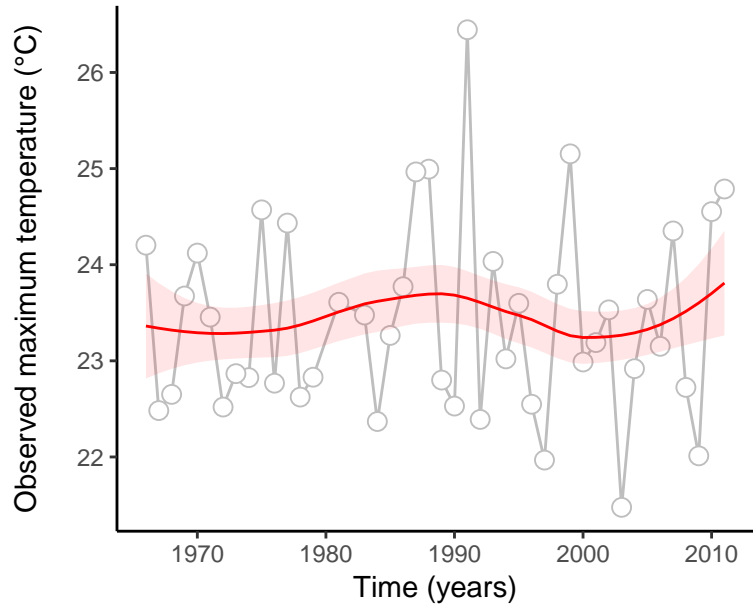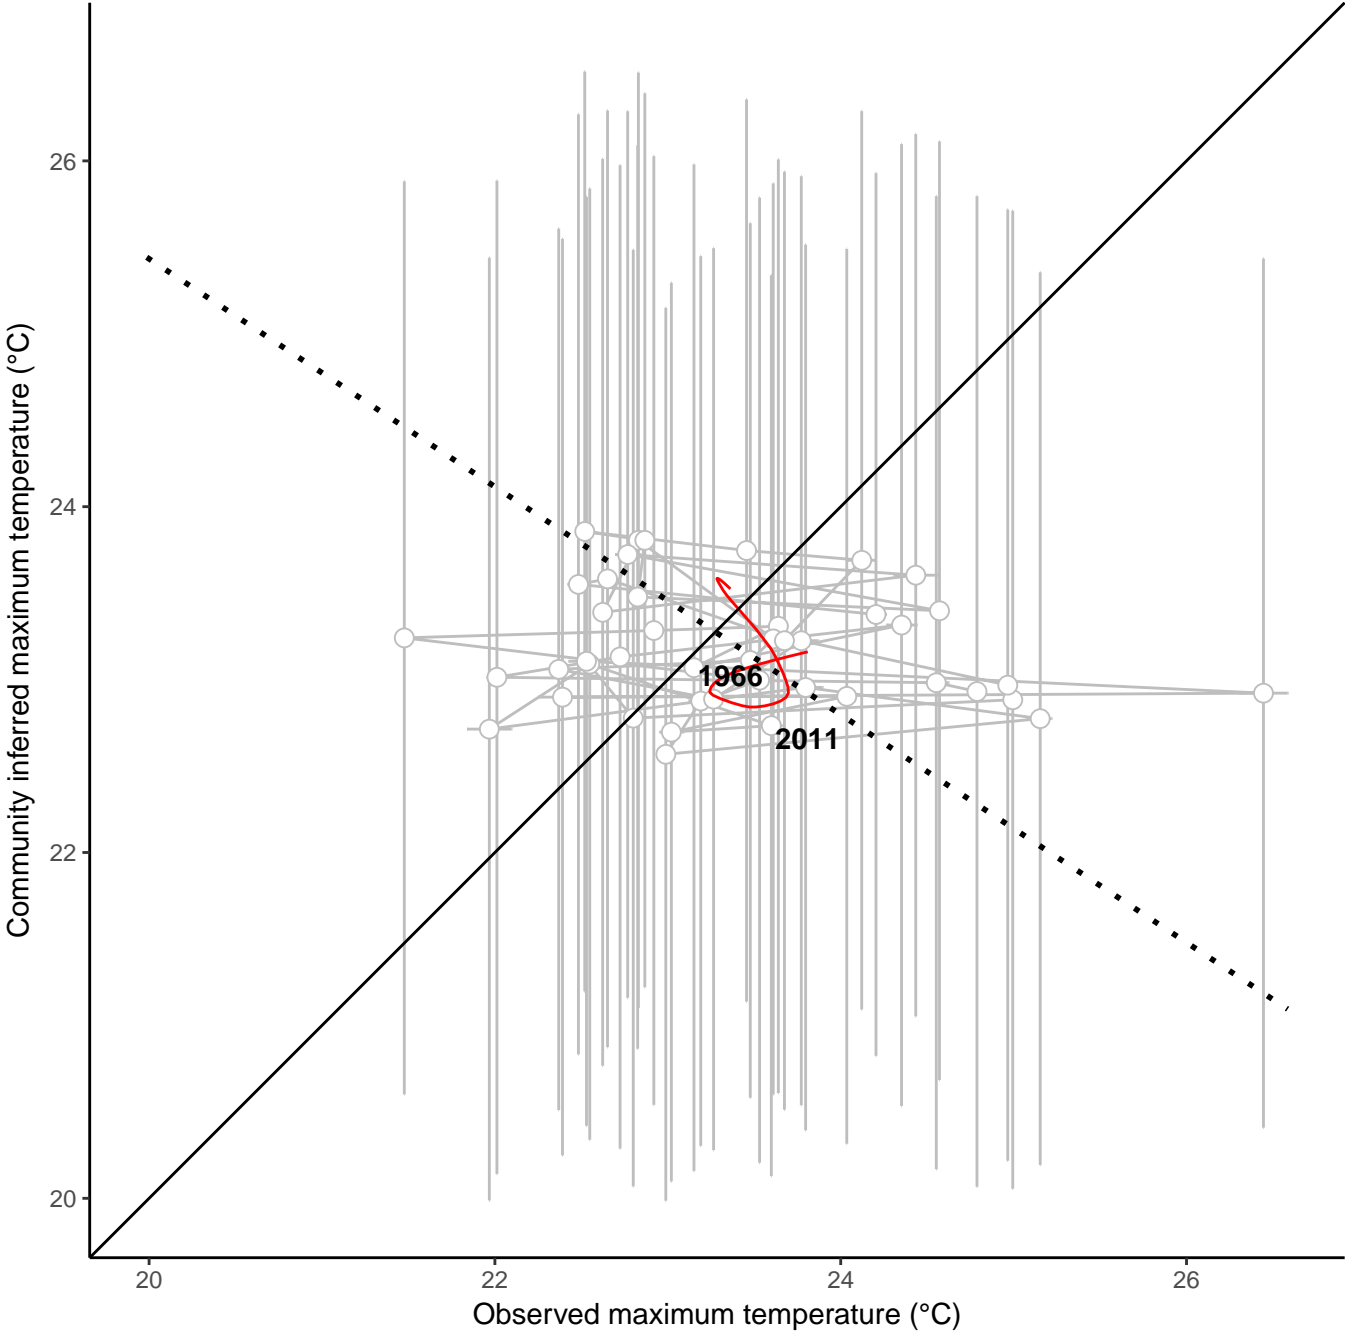

site : 840\_87\_14

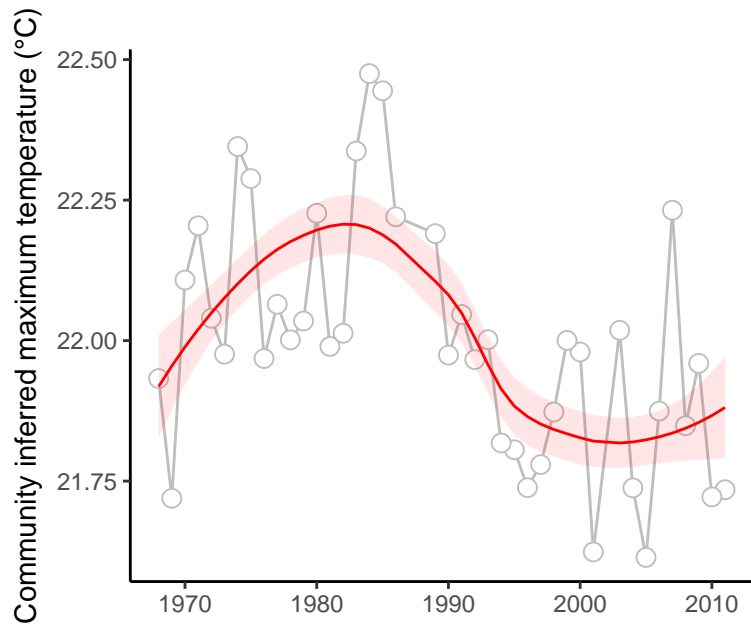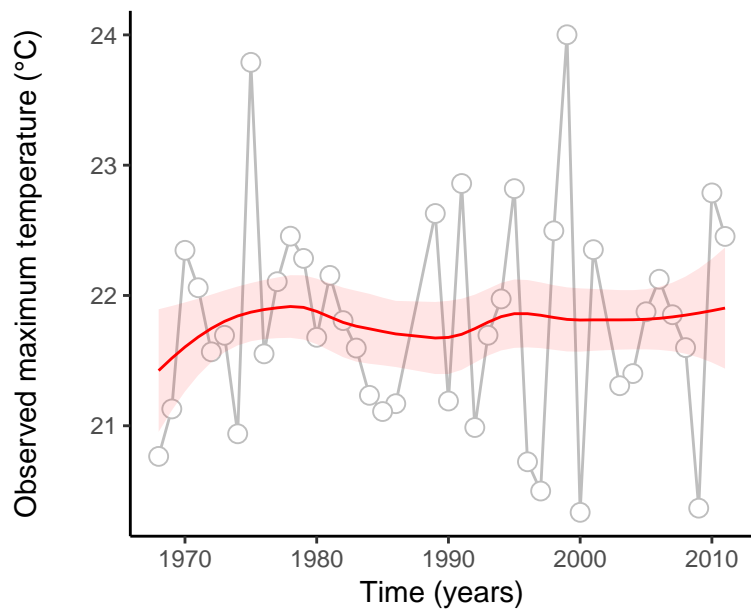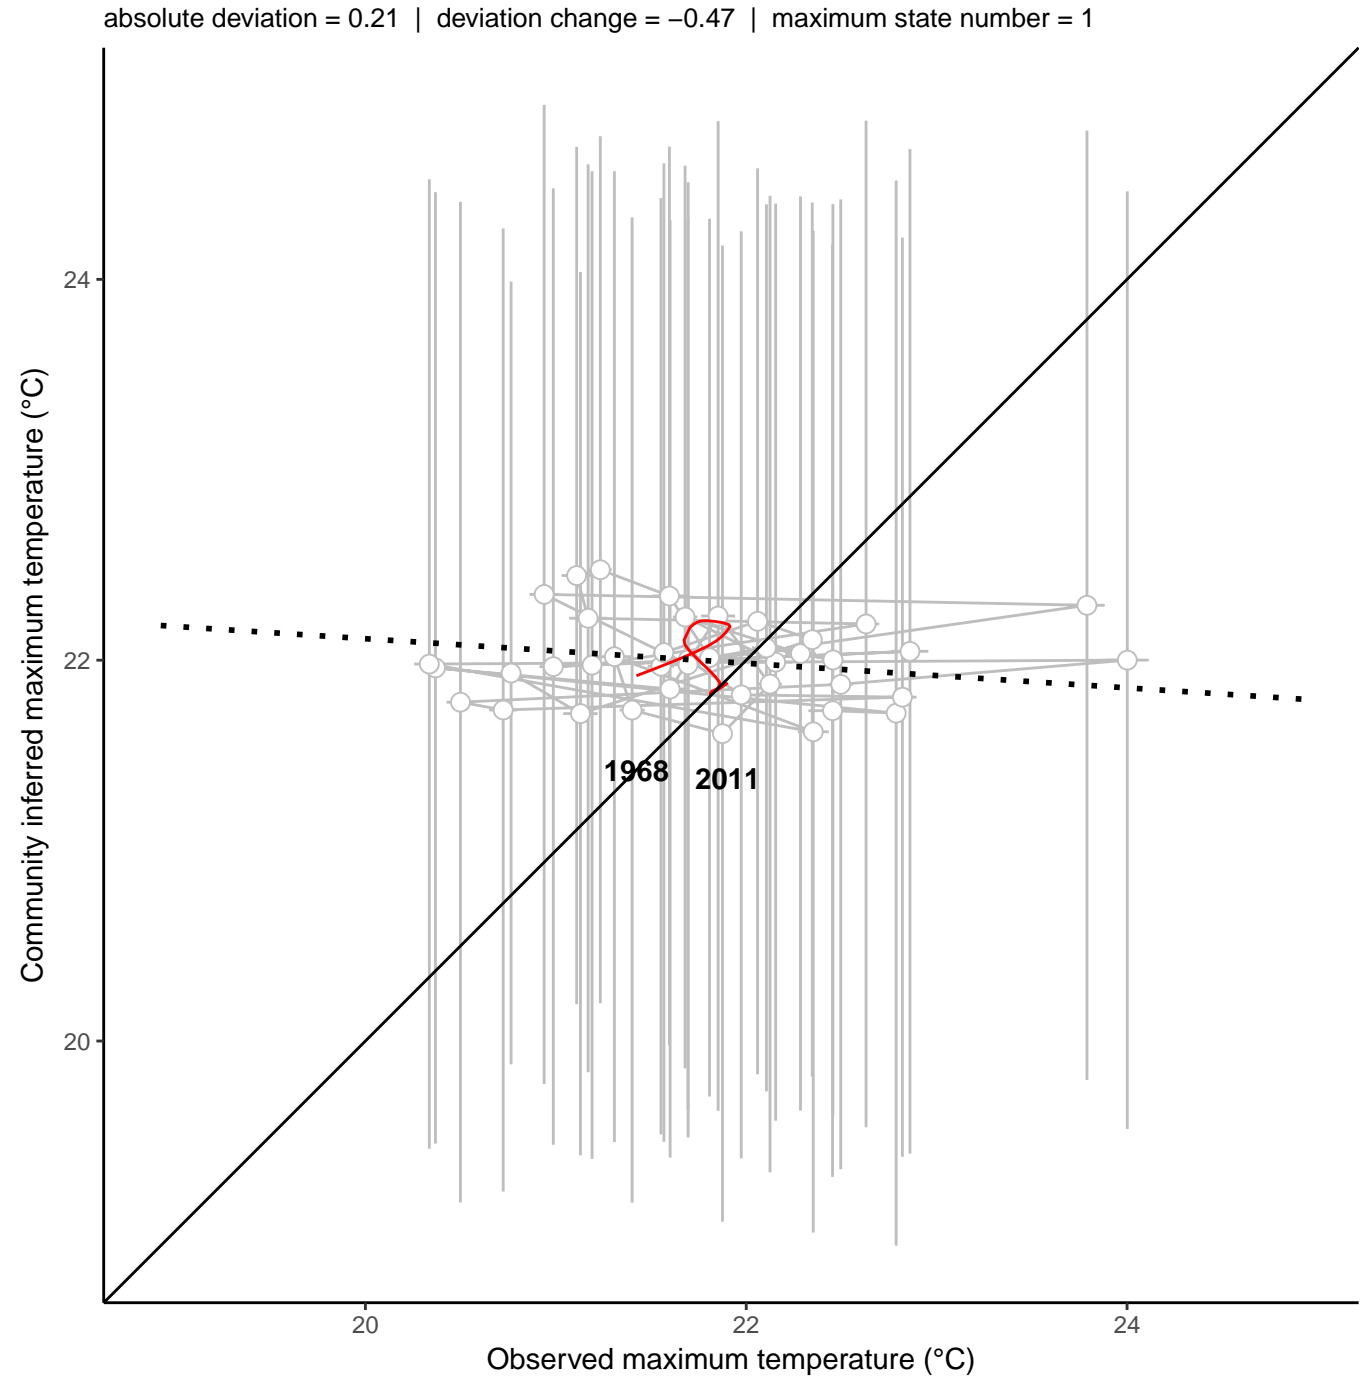

site : 840\_89\_2

absolute deviation = 3.77 | deviation change = 1.42 | maximum state number = 1

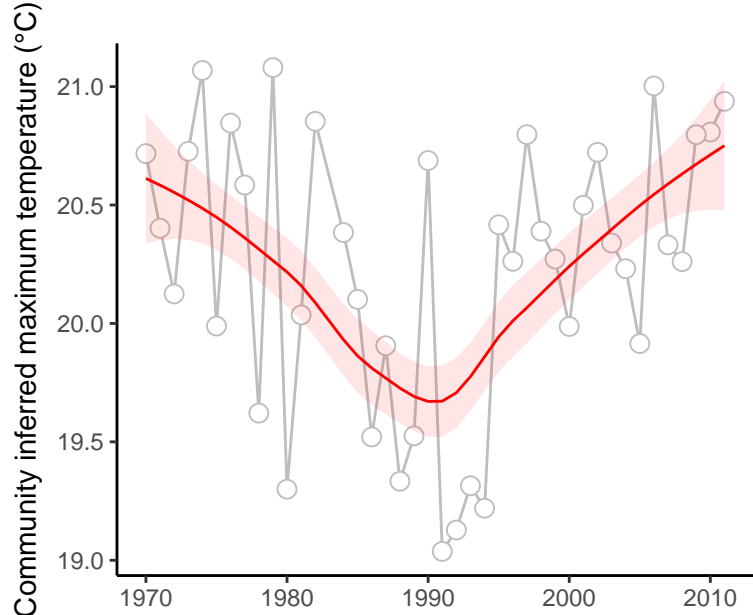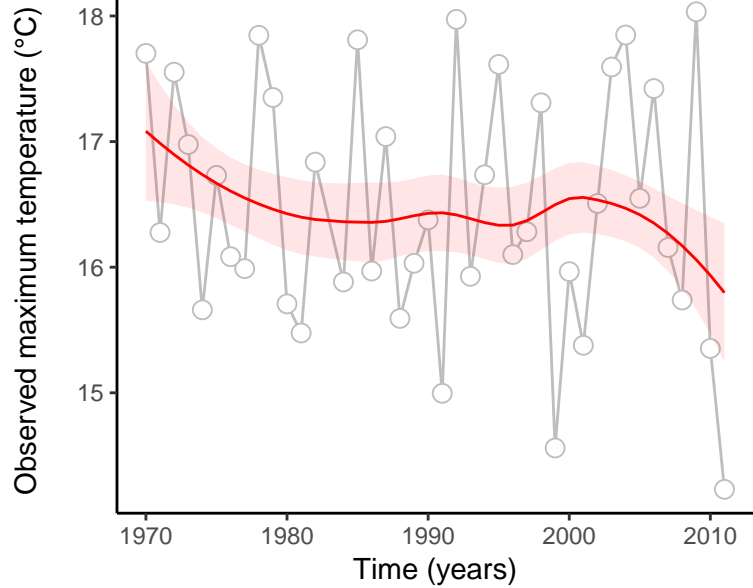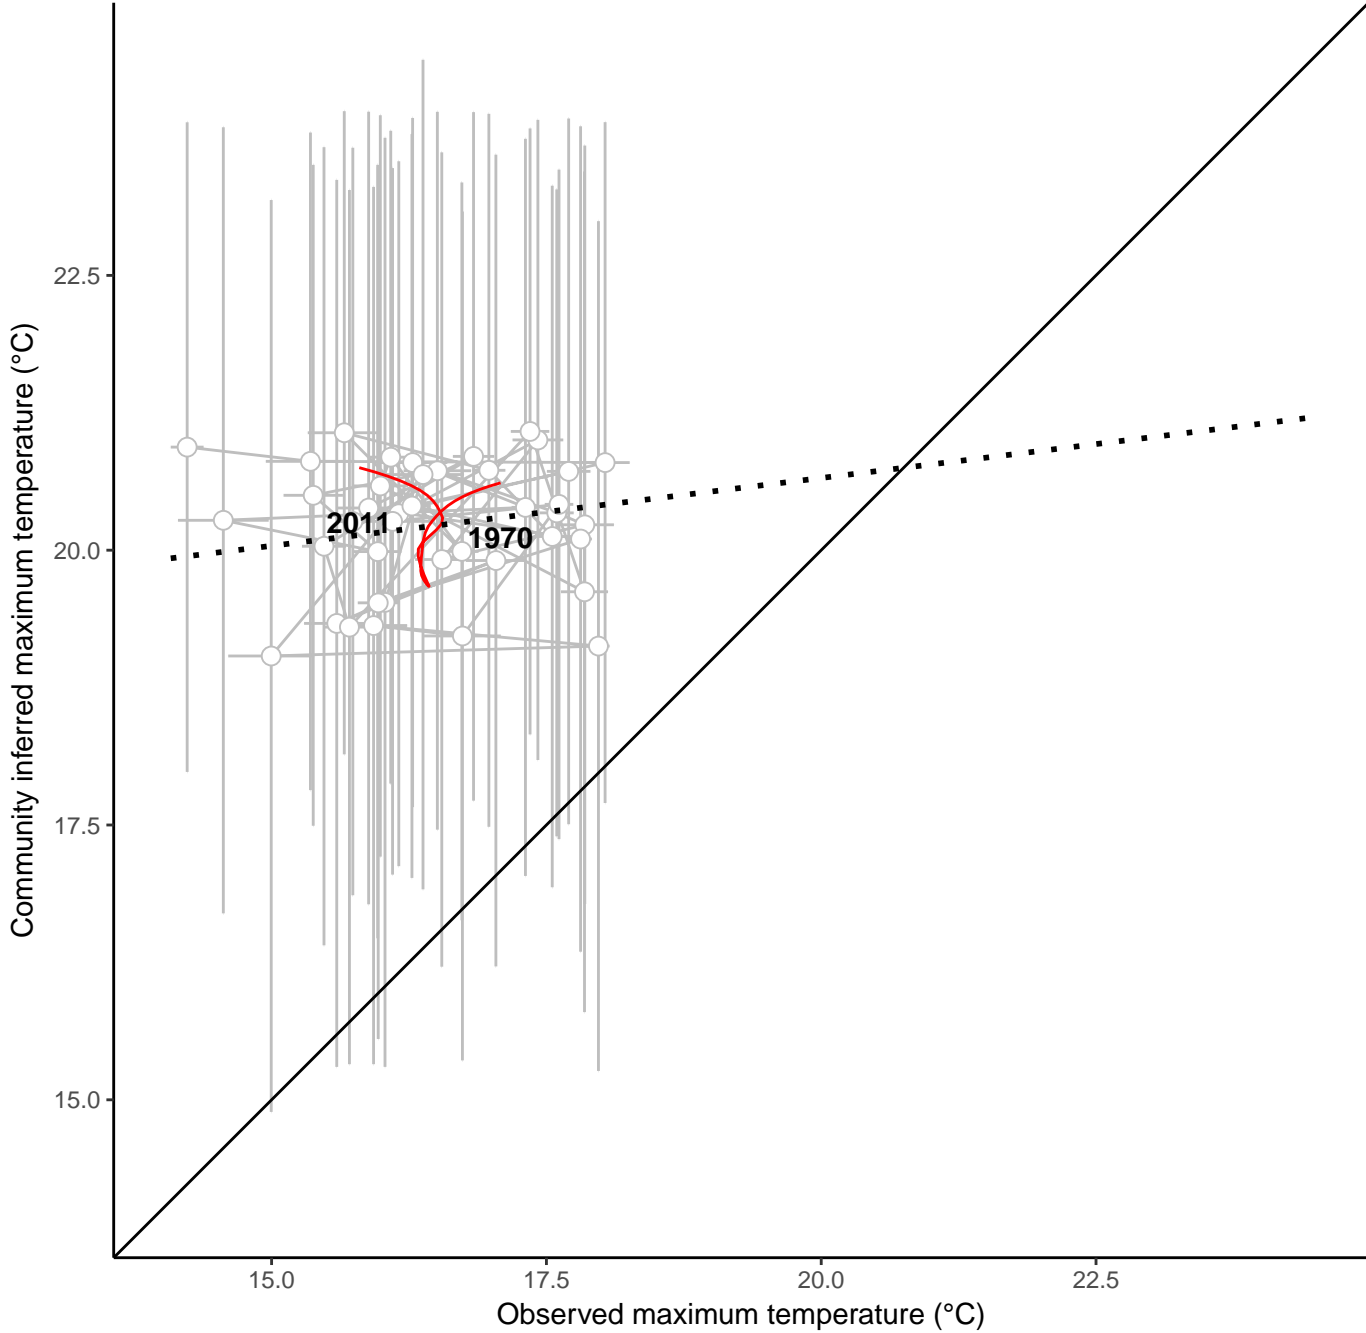

site : 840\_90\_41

absolute deviation = 1.36 | deviation change = 0.75 | maximum state number = 1

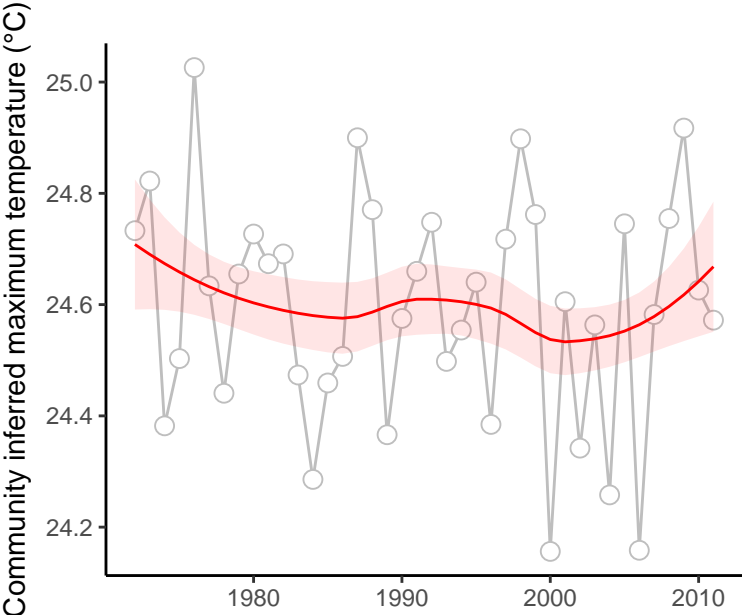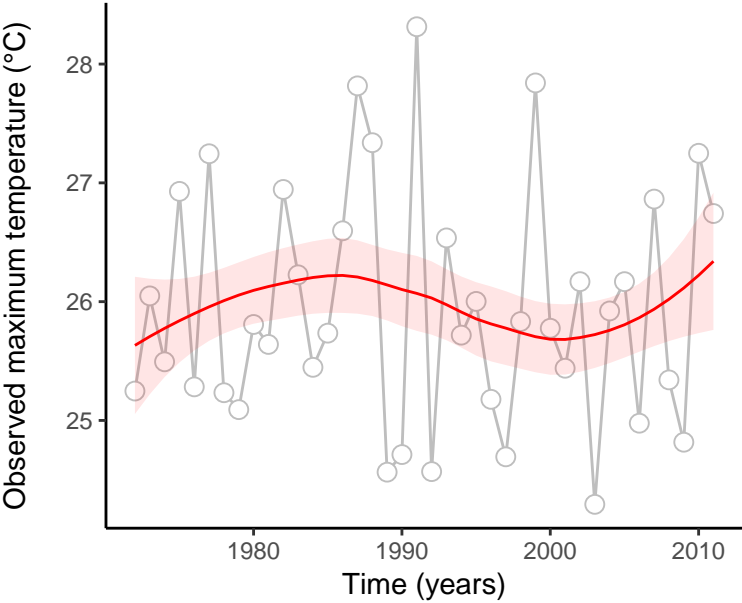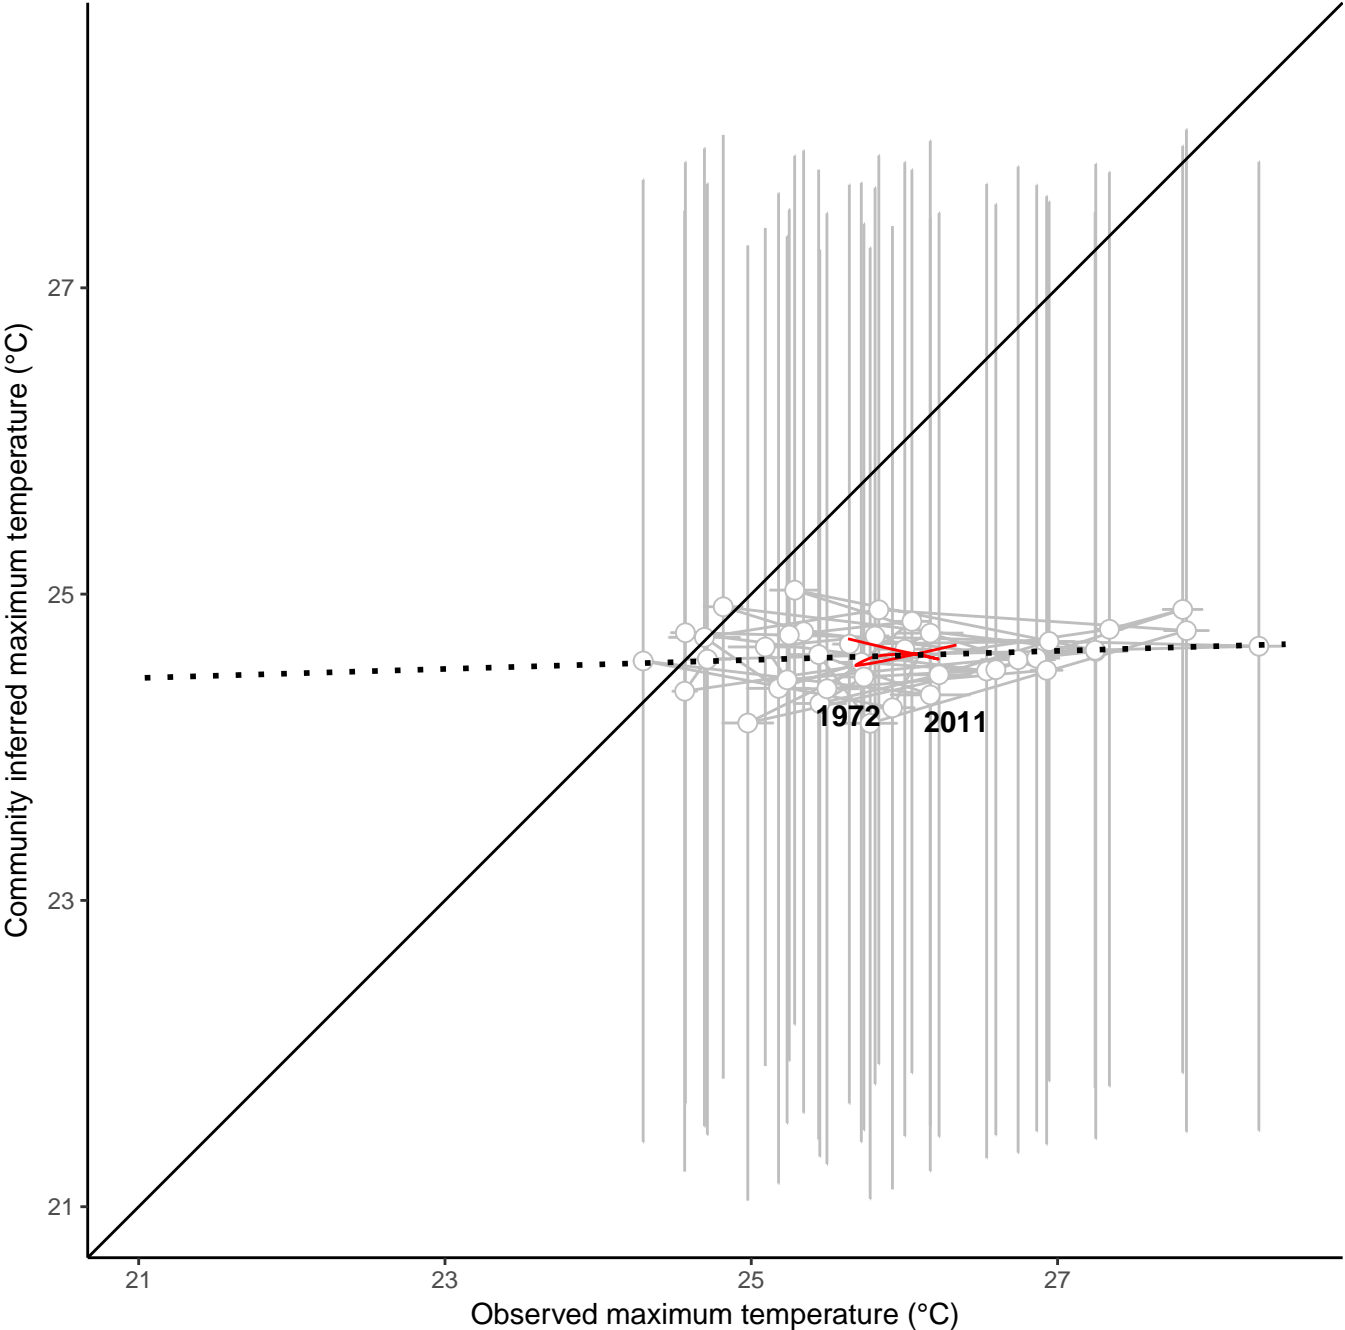



site : 840\_14\_108

absolute deviation = 0.43 | deviation change = 1.03 | maximum state number = 1

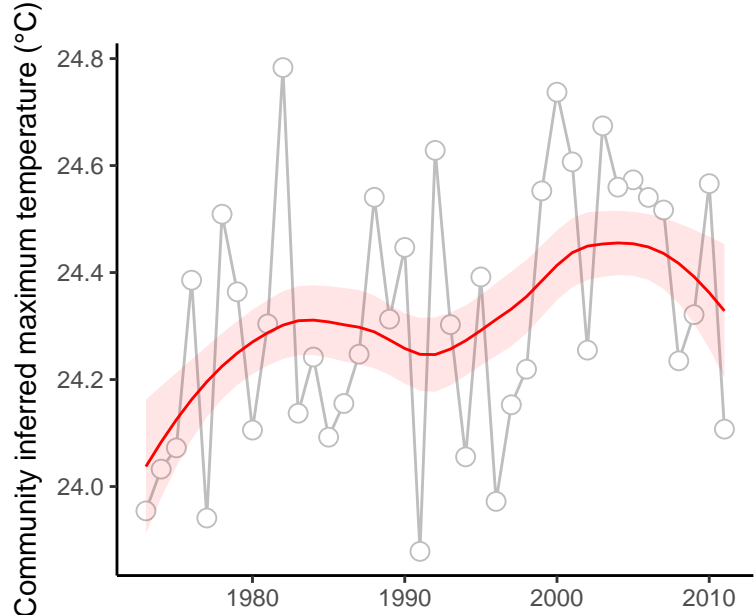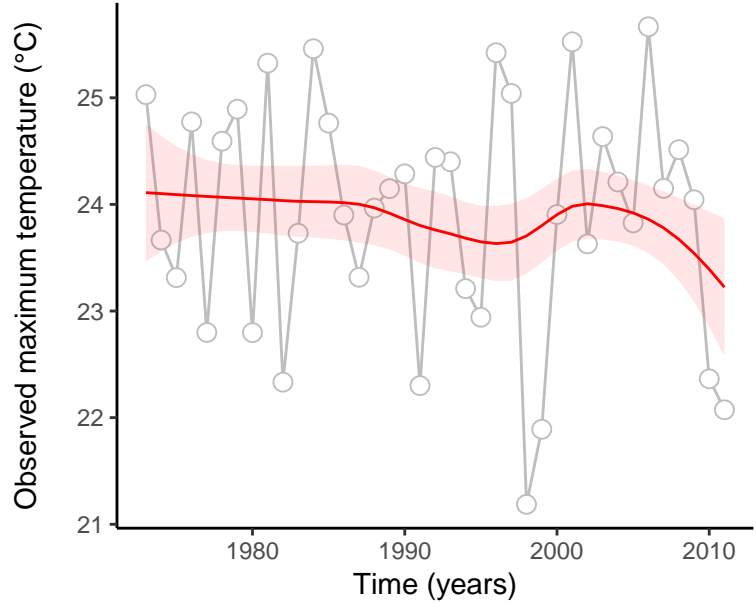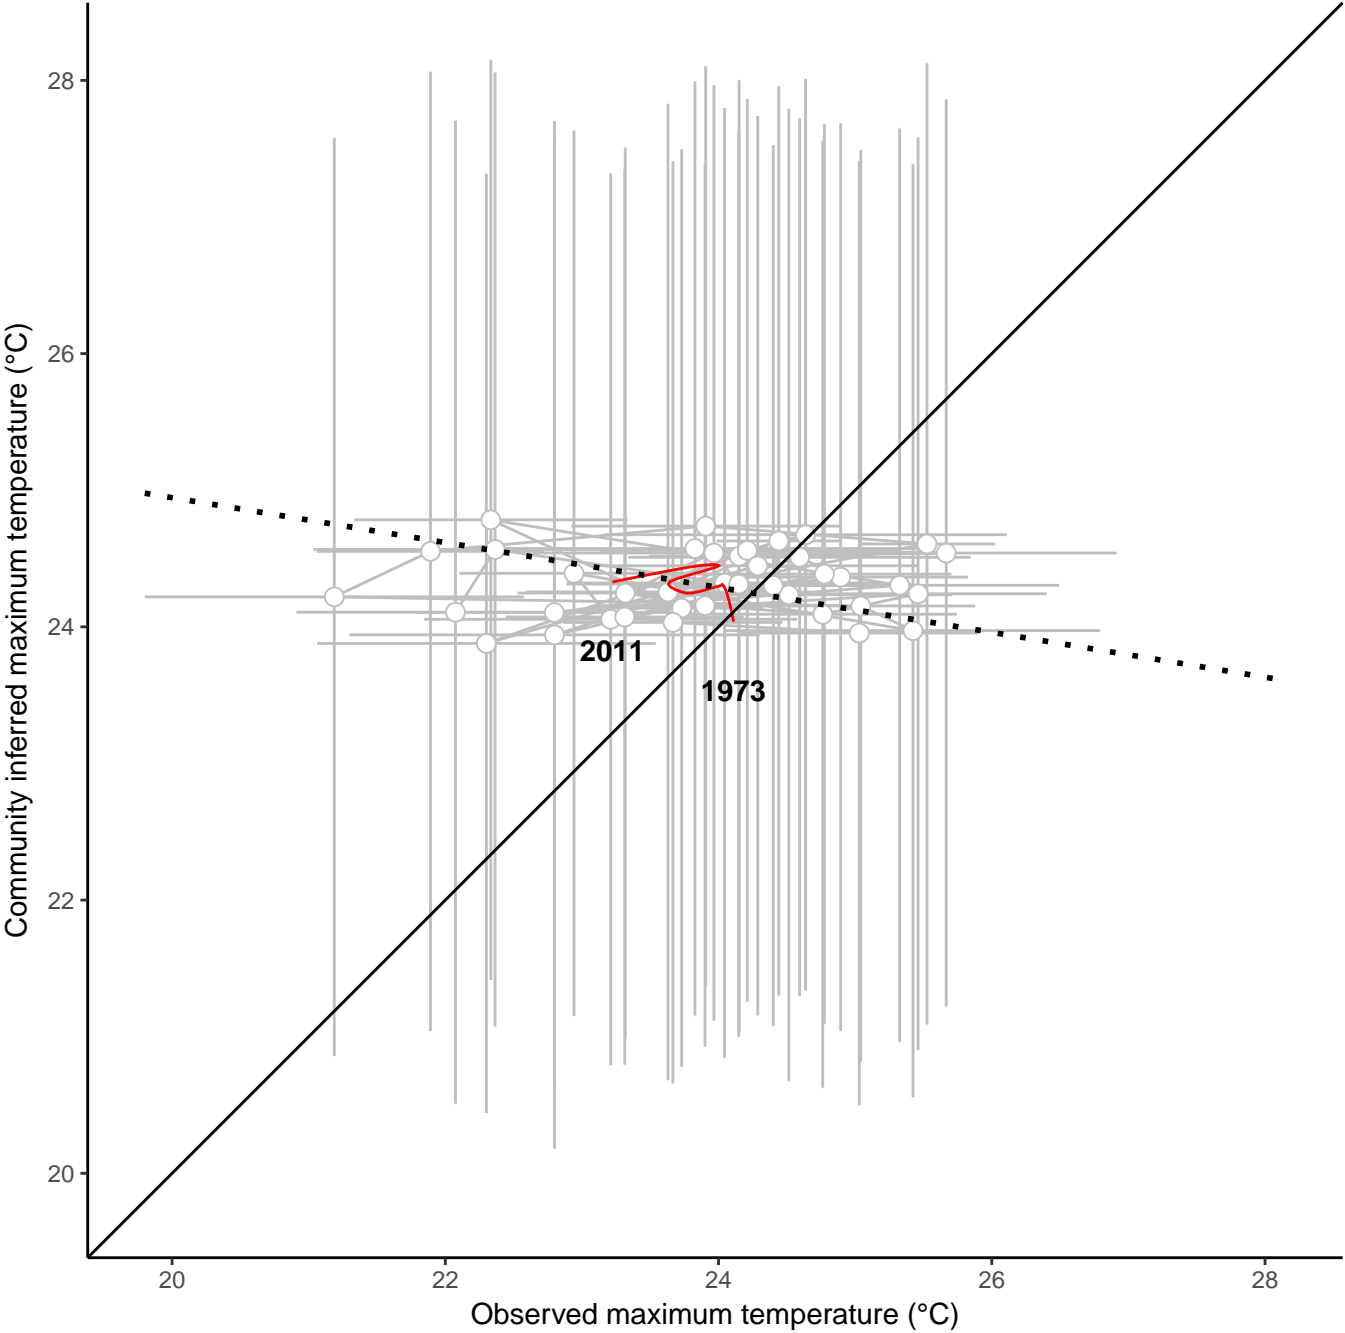

site : 840\_14\_11

absolute deviation = 3.99 | deviation change = -2.33 | maximum state number = 1

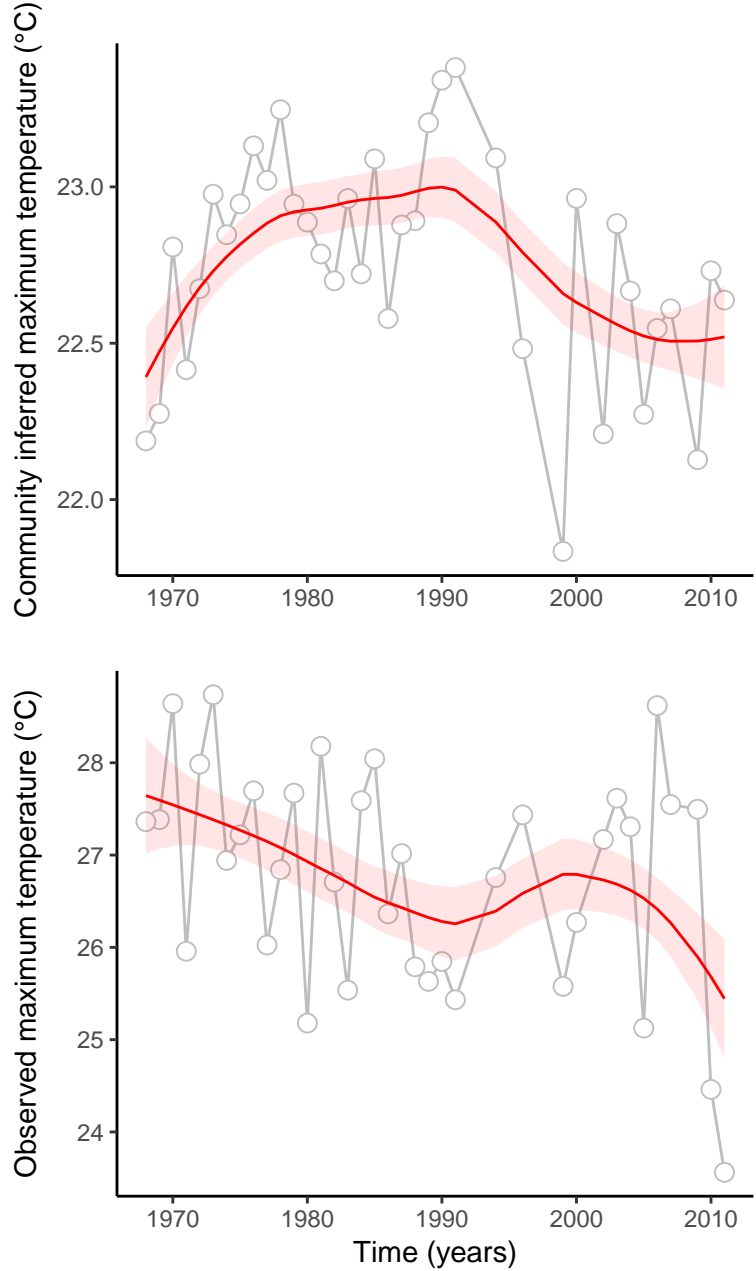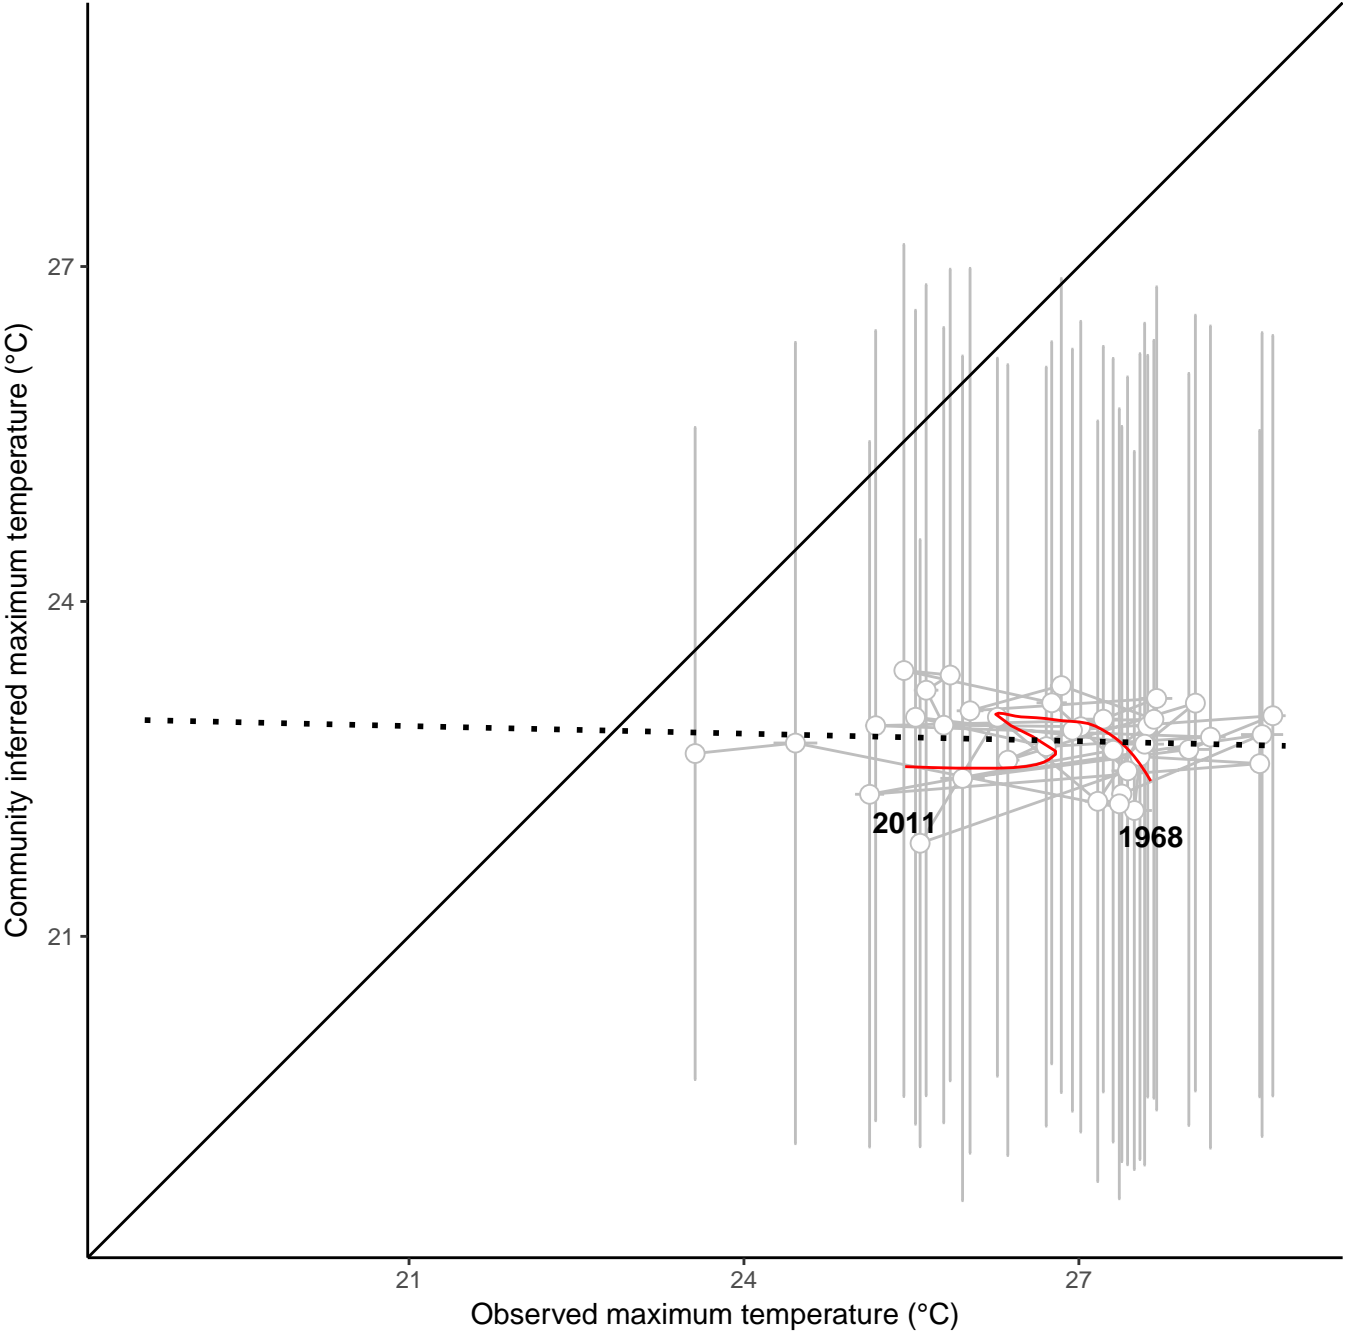

site : 840\_2\_10

absolute deviation = 4.03 | deviation change = 1.38 | maximum state number = 1

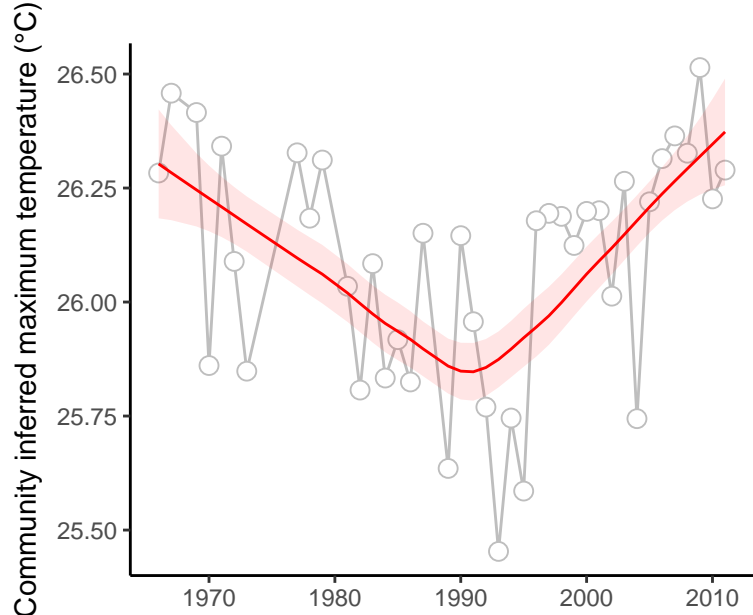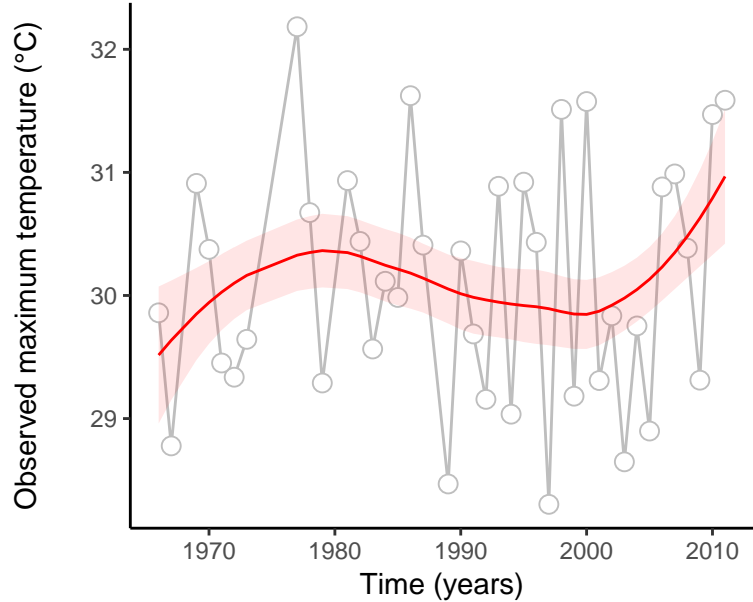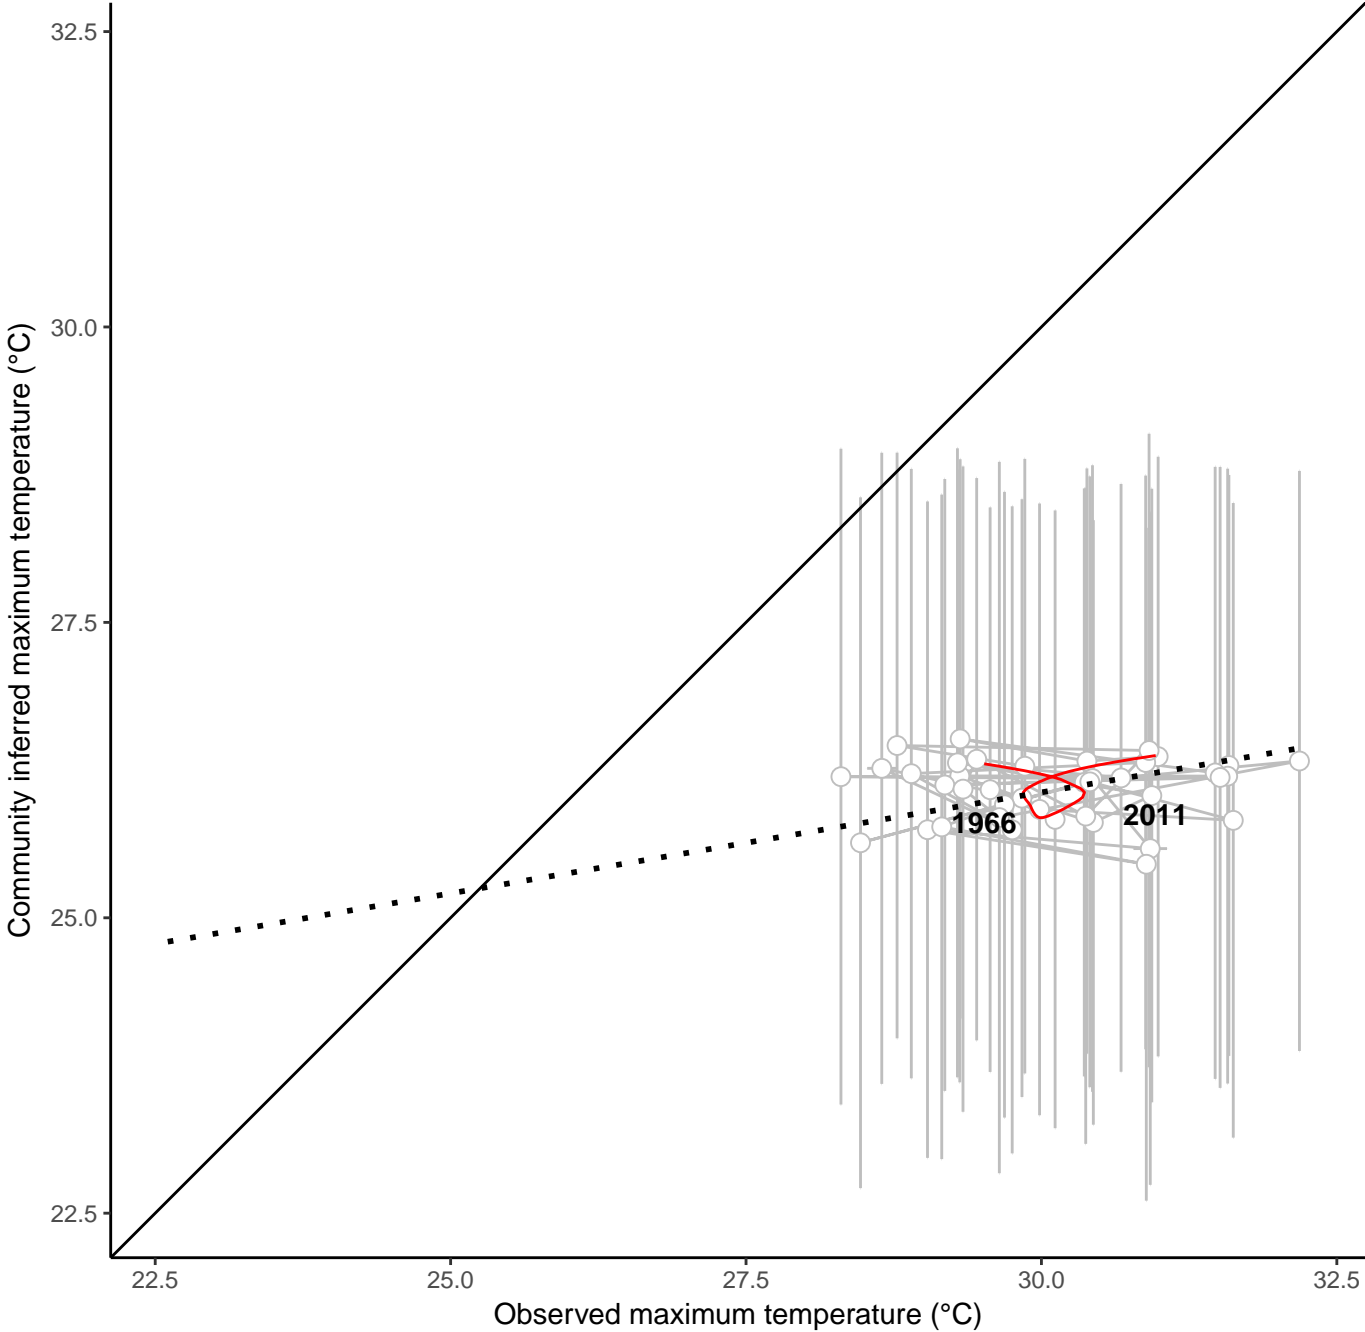

site : 840\_25\_1

absolute deviation = 4.62 | deviation change = 1.45 | maximum state number = 1

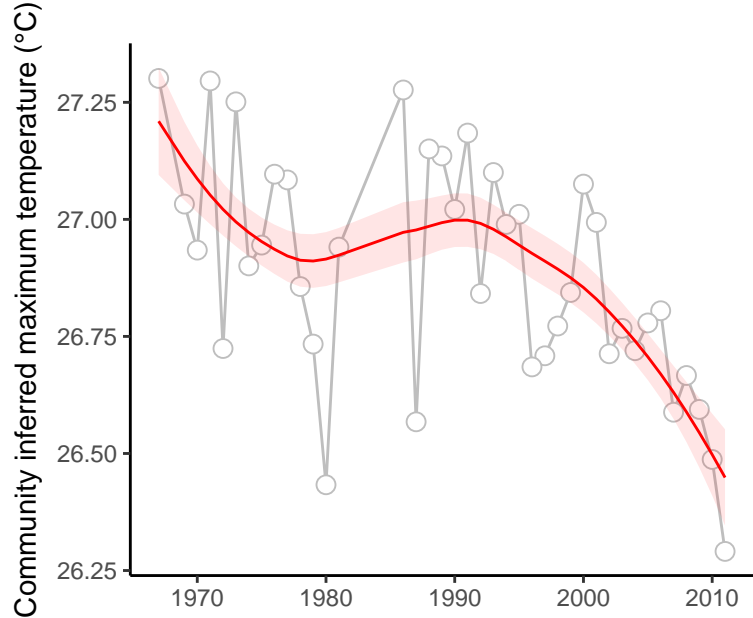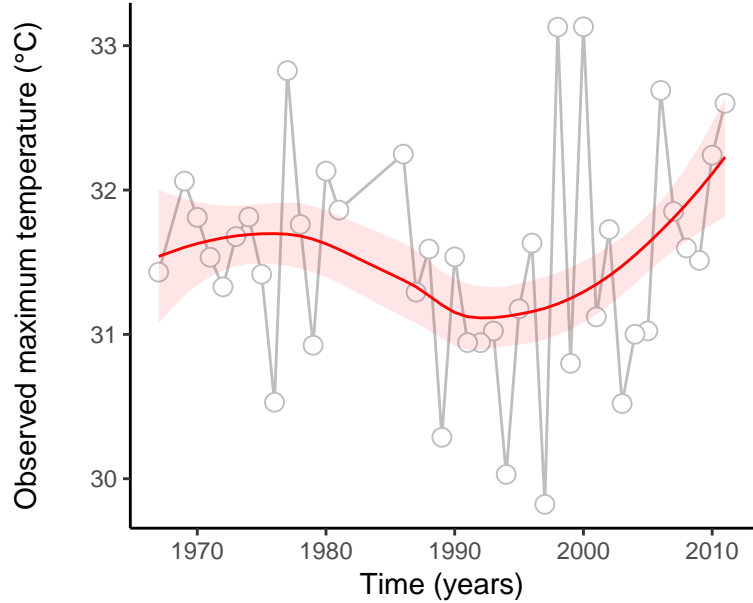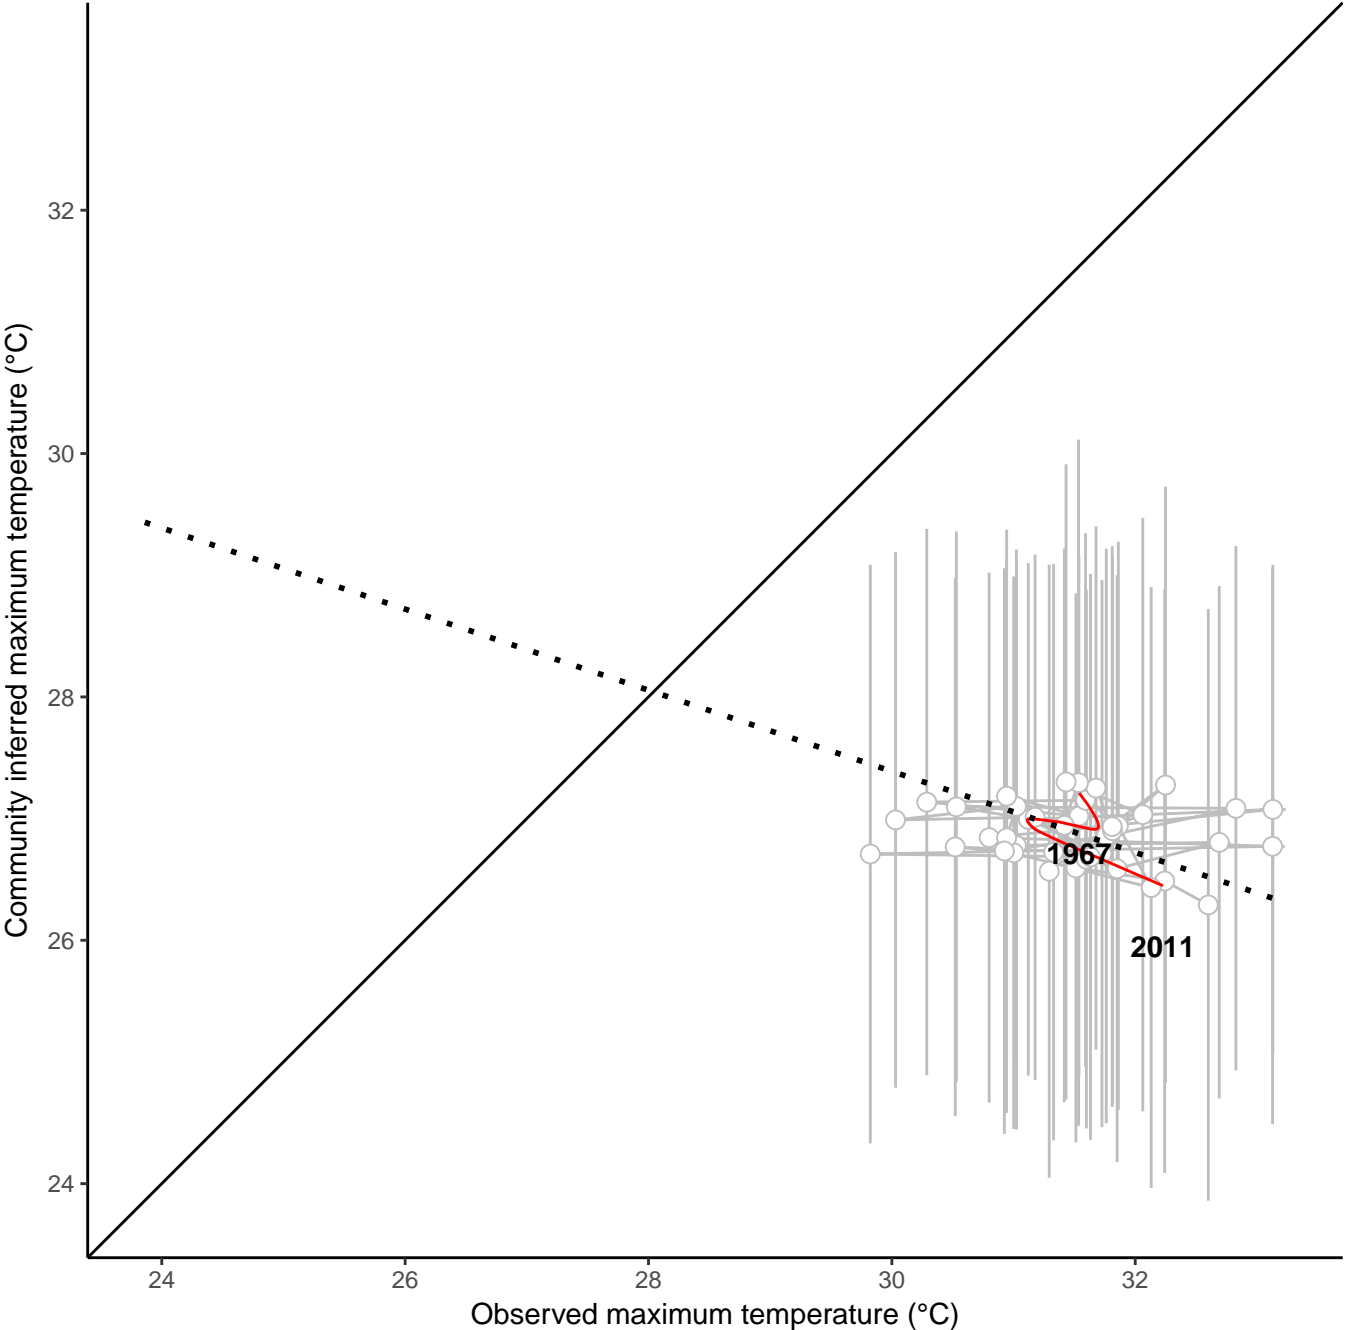

site : 840\_39\_21

absolute deviation = 2.83 | deviation change = 0.93 | maximum state number = 1

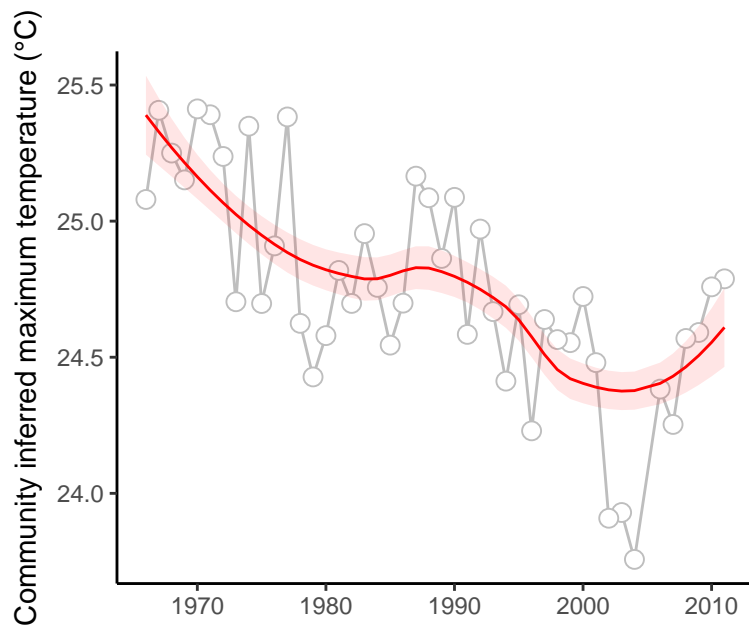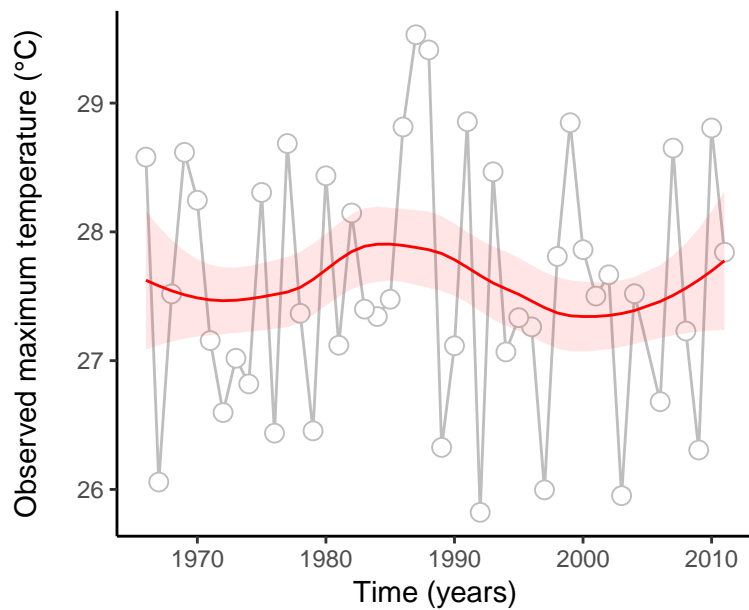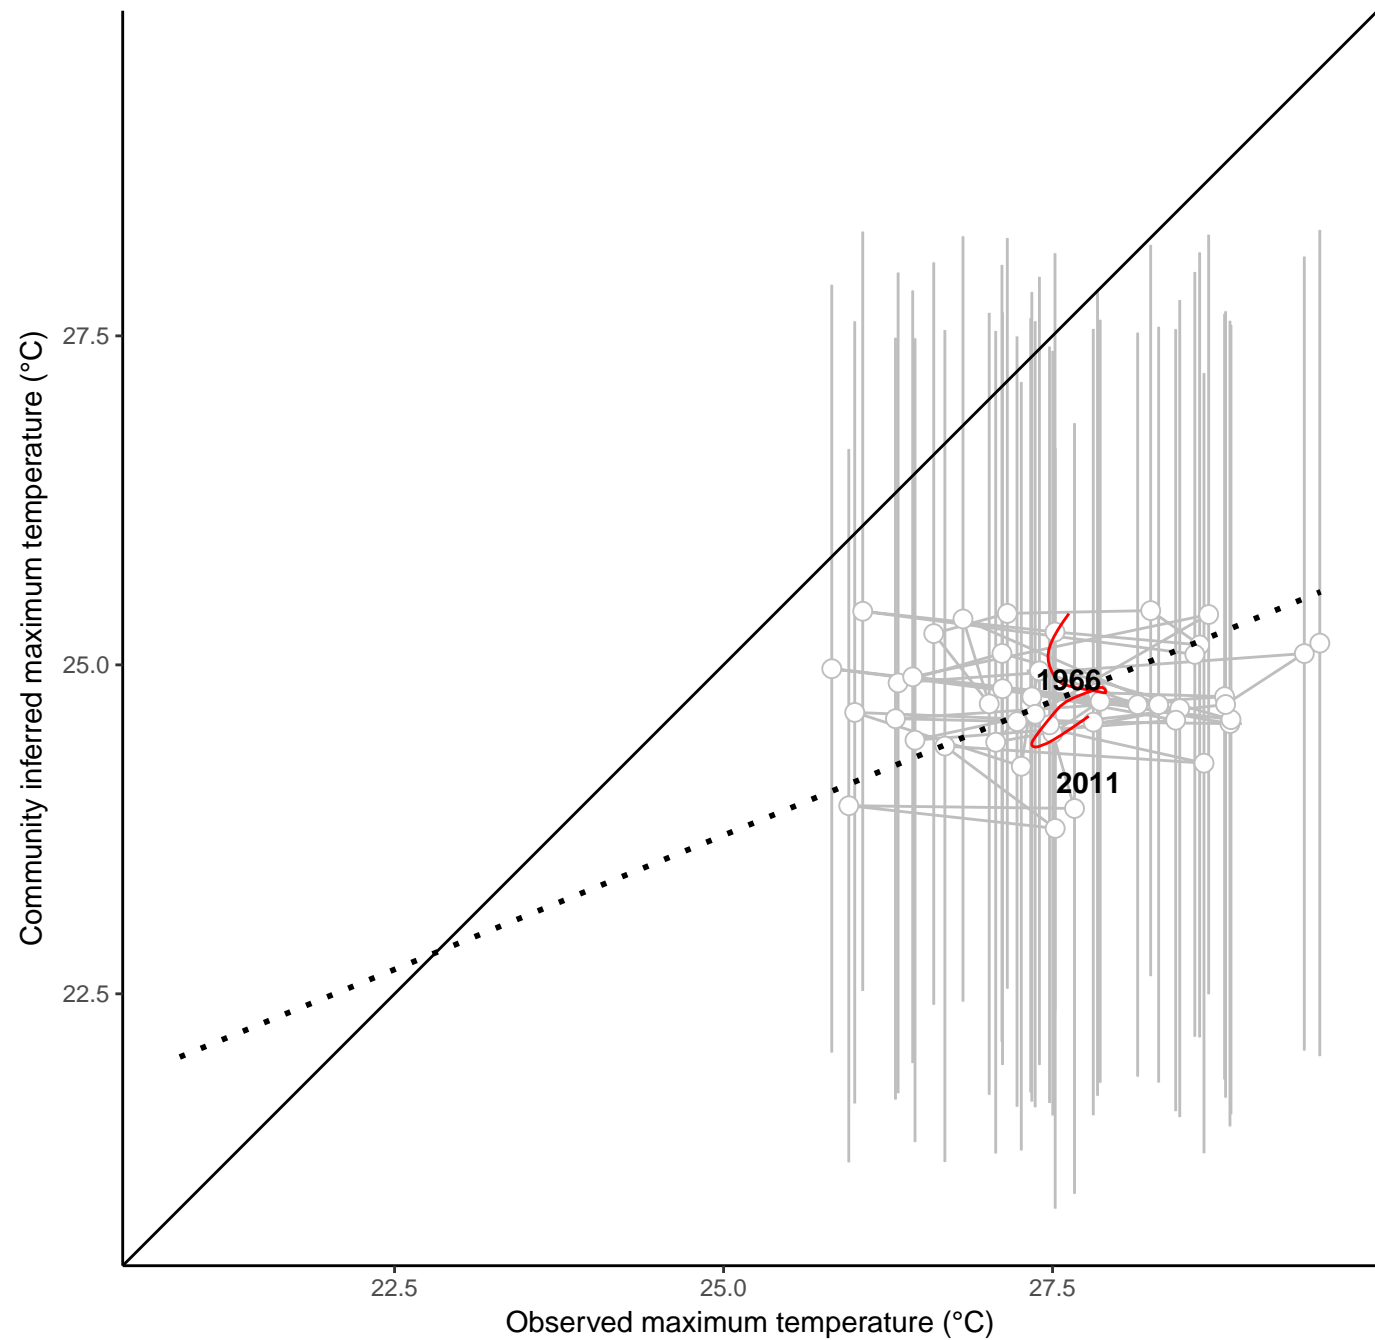

site : 840\_46\_15

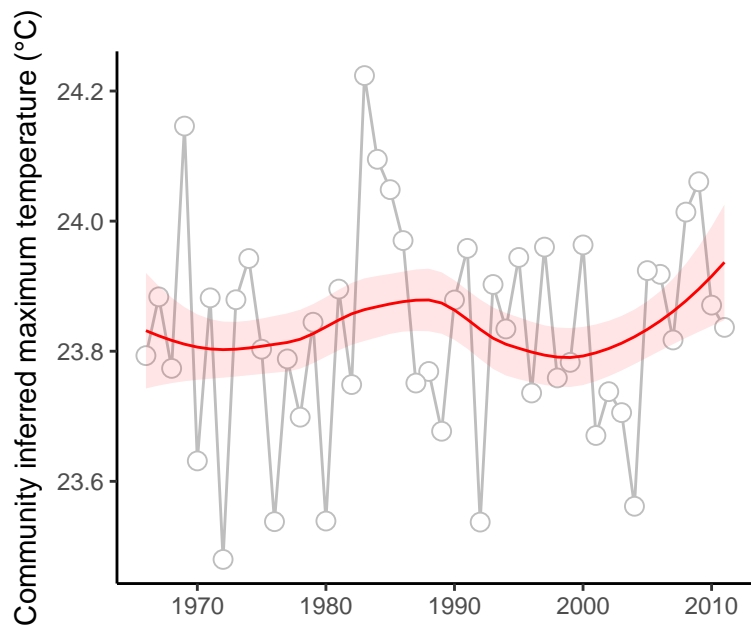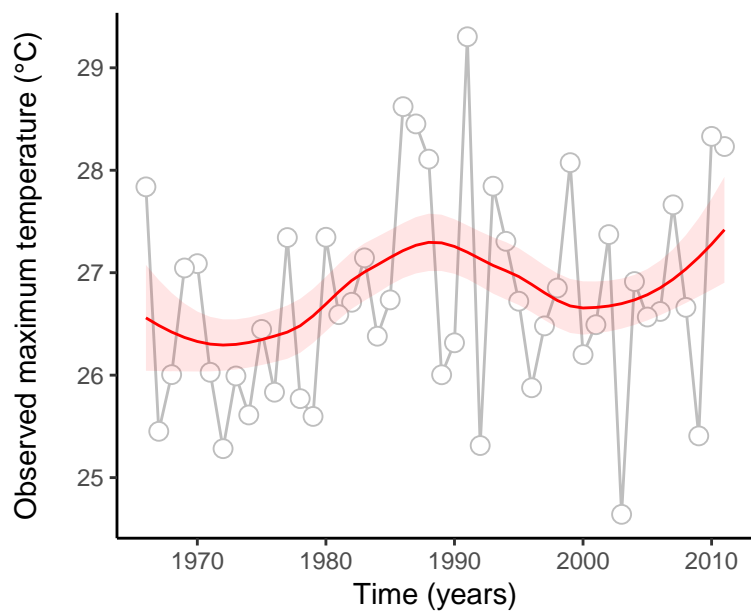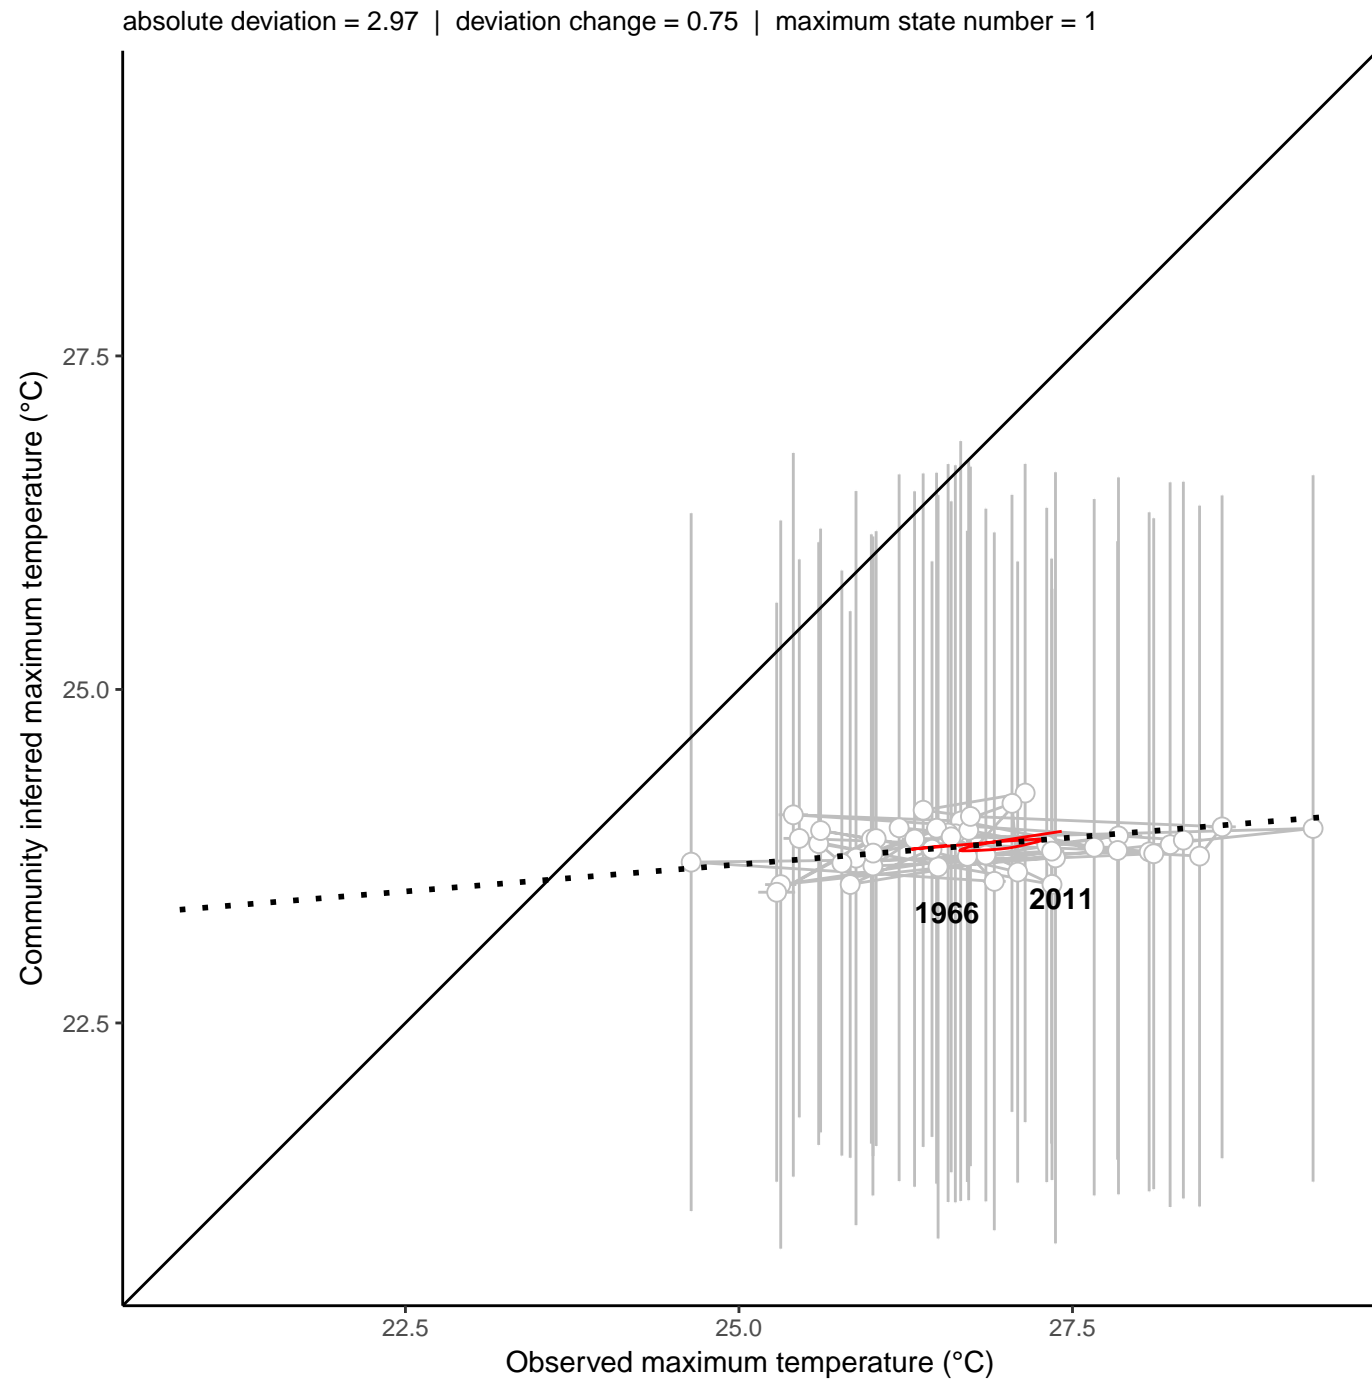

site : 840\_46\_30

absolute deviation = 2.34 | deviation change = 0.39 | maximum state number = 2

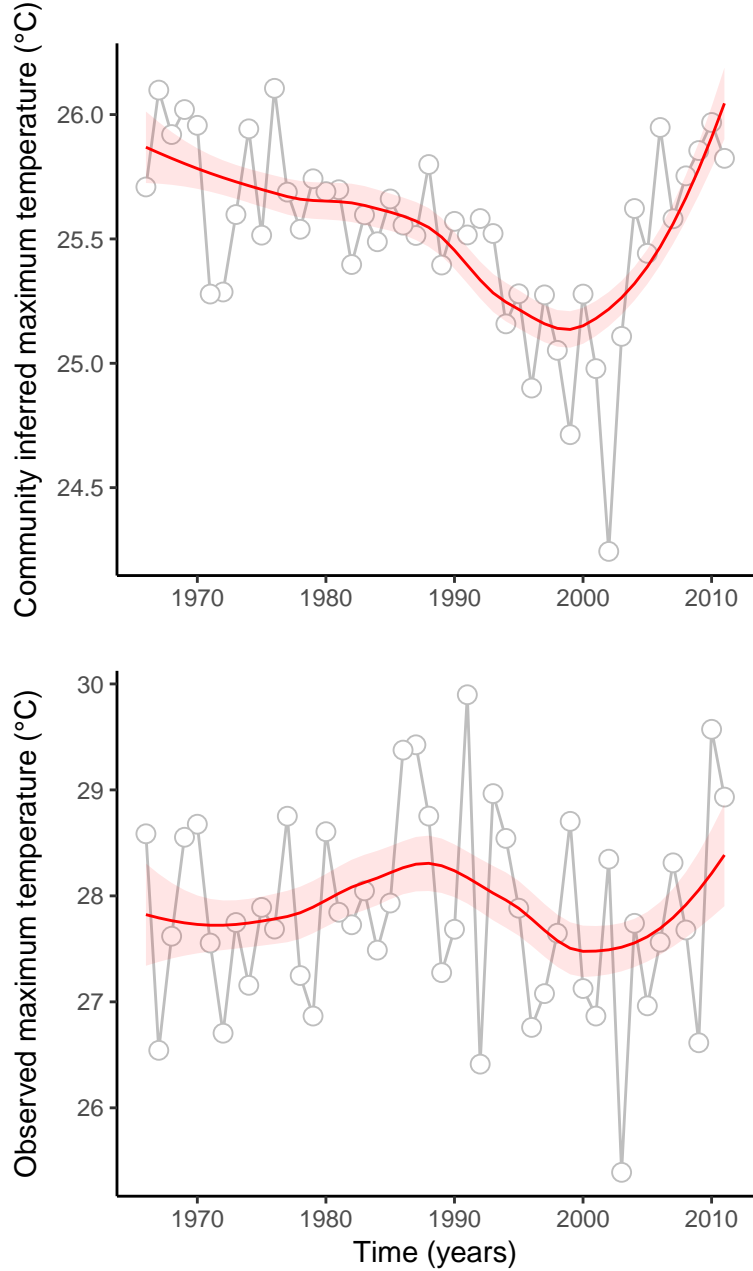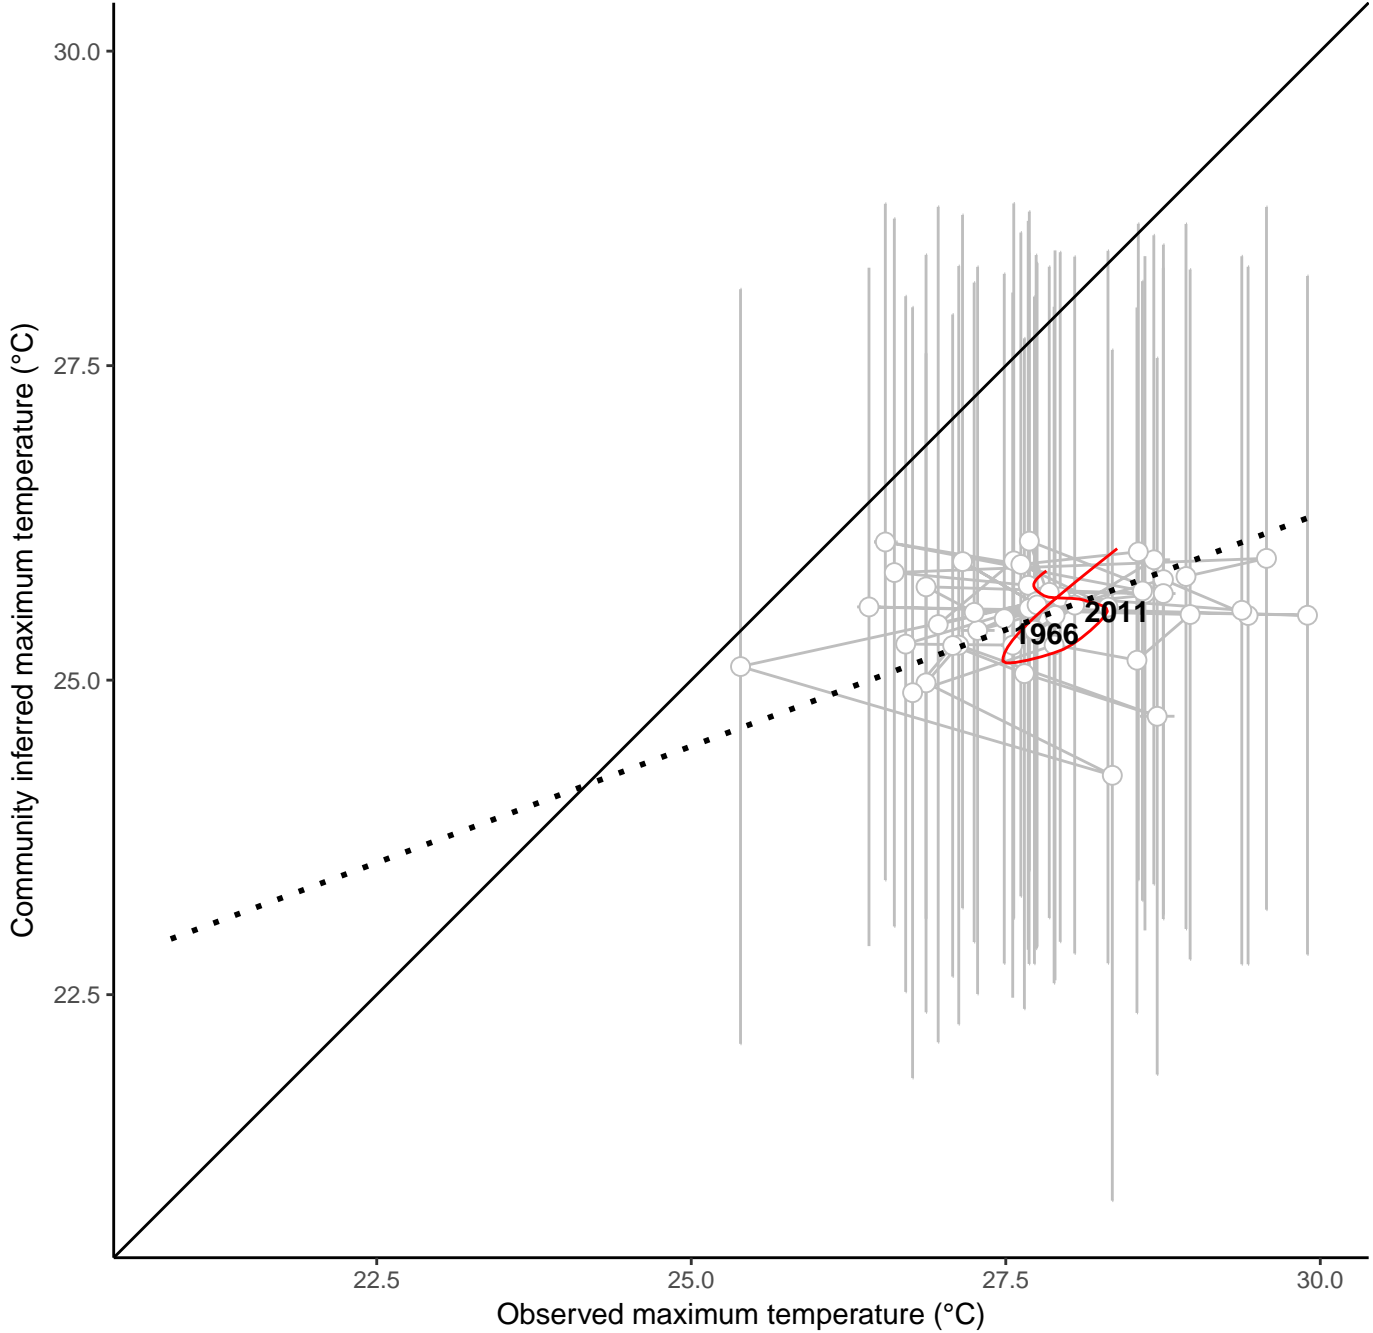

site : 840\_46\_4

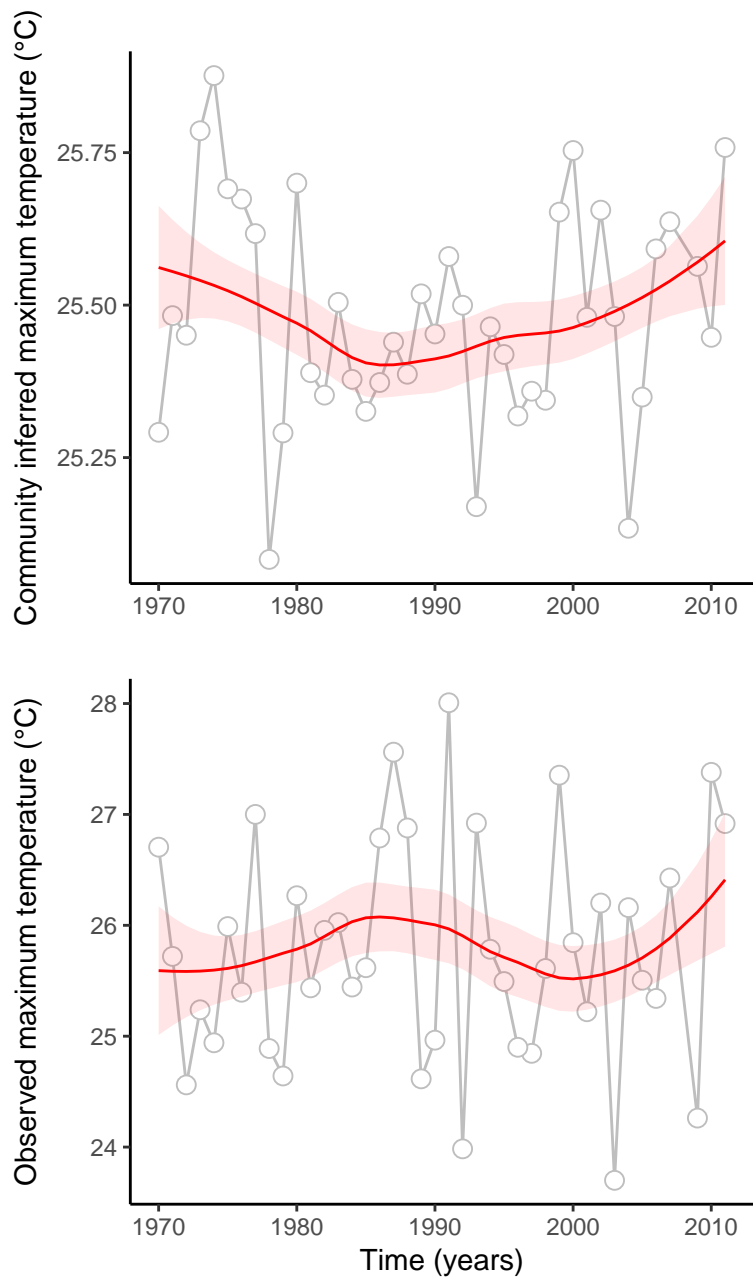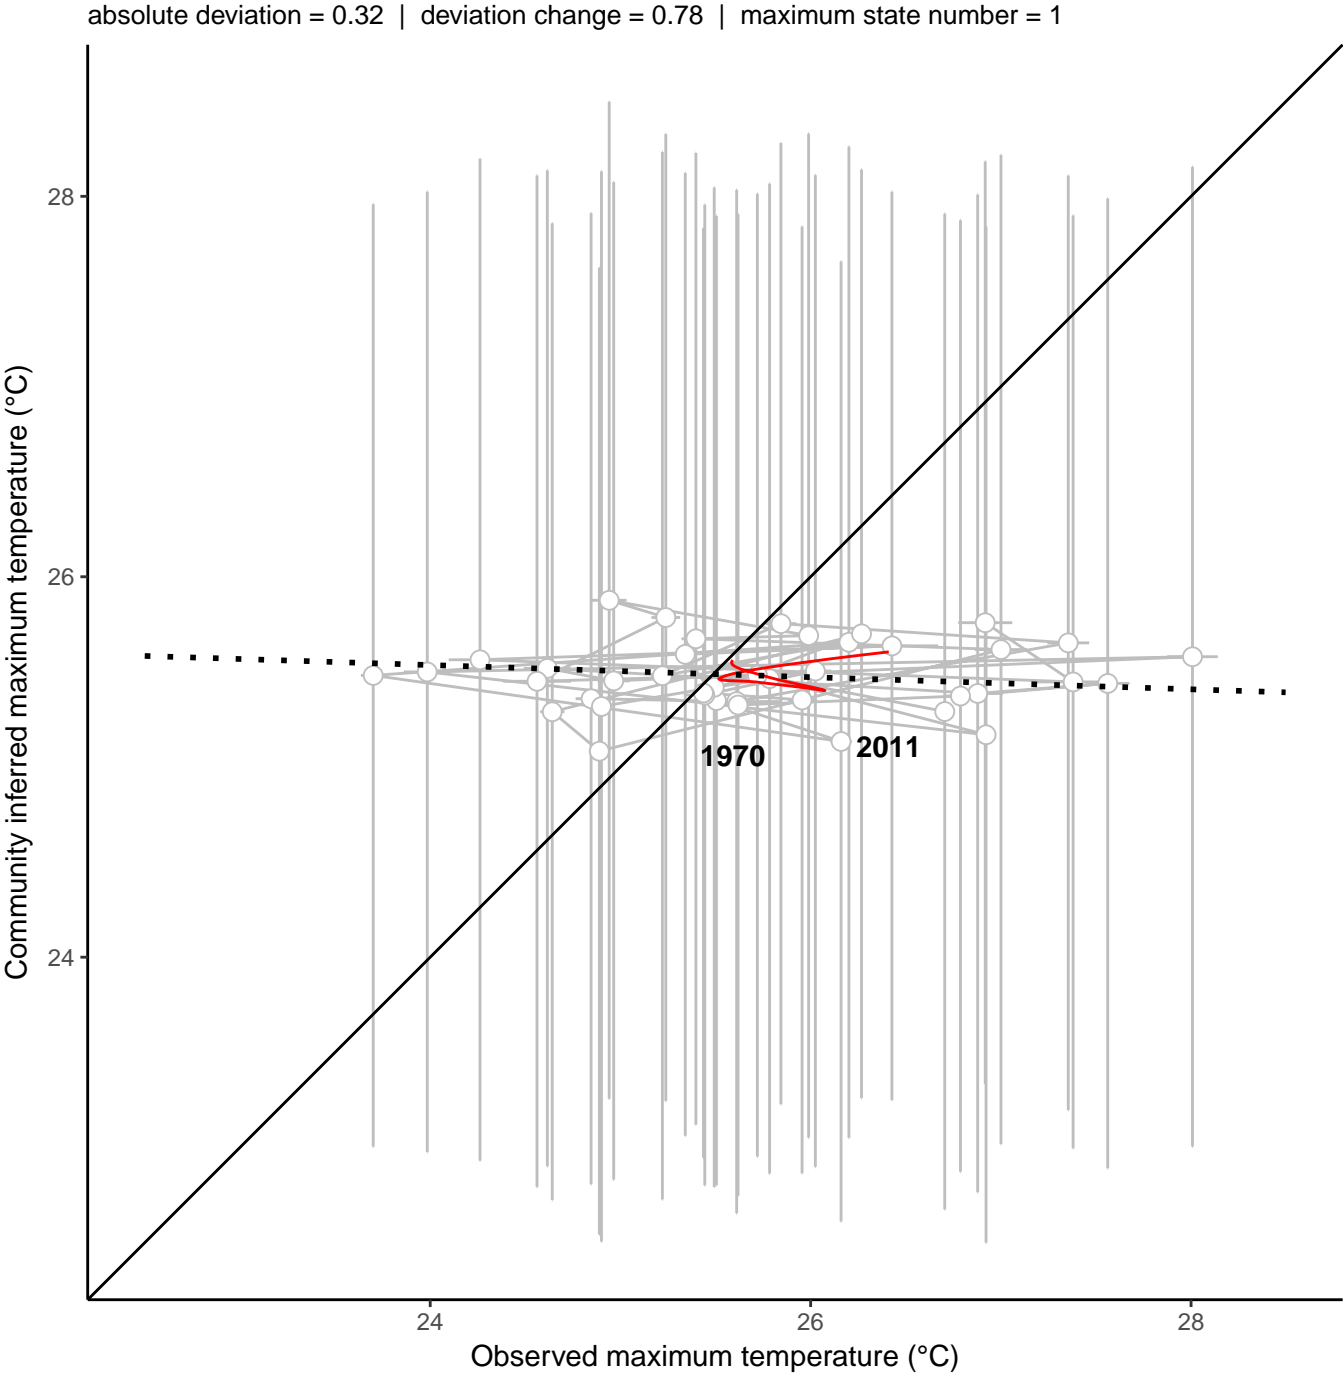



site : 840\_66\_2

absolute deviation = 3.19 | deviation change = 0.89 | maximum state number = 1

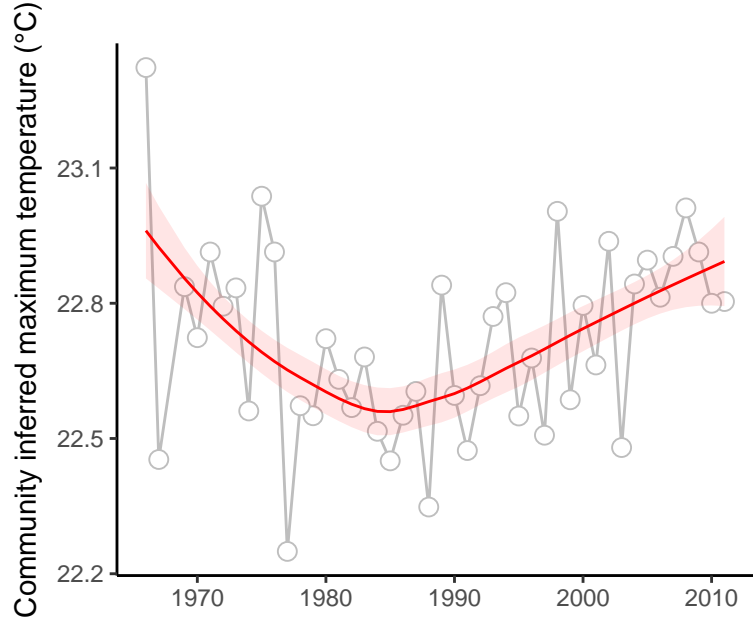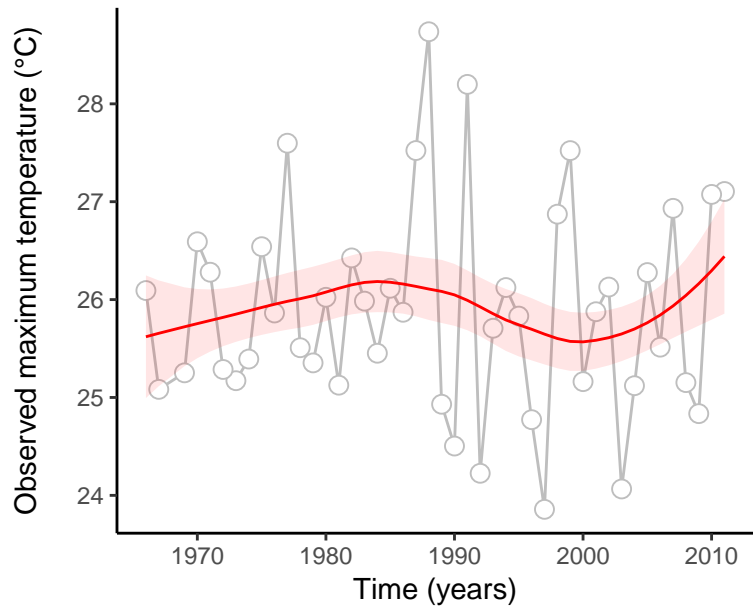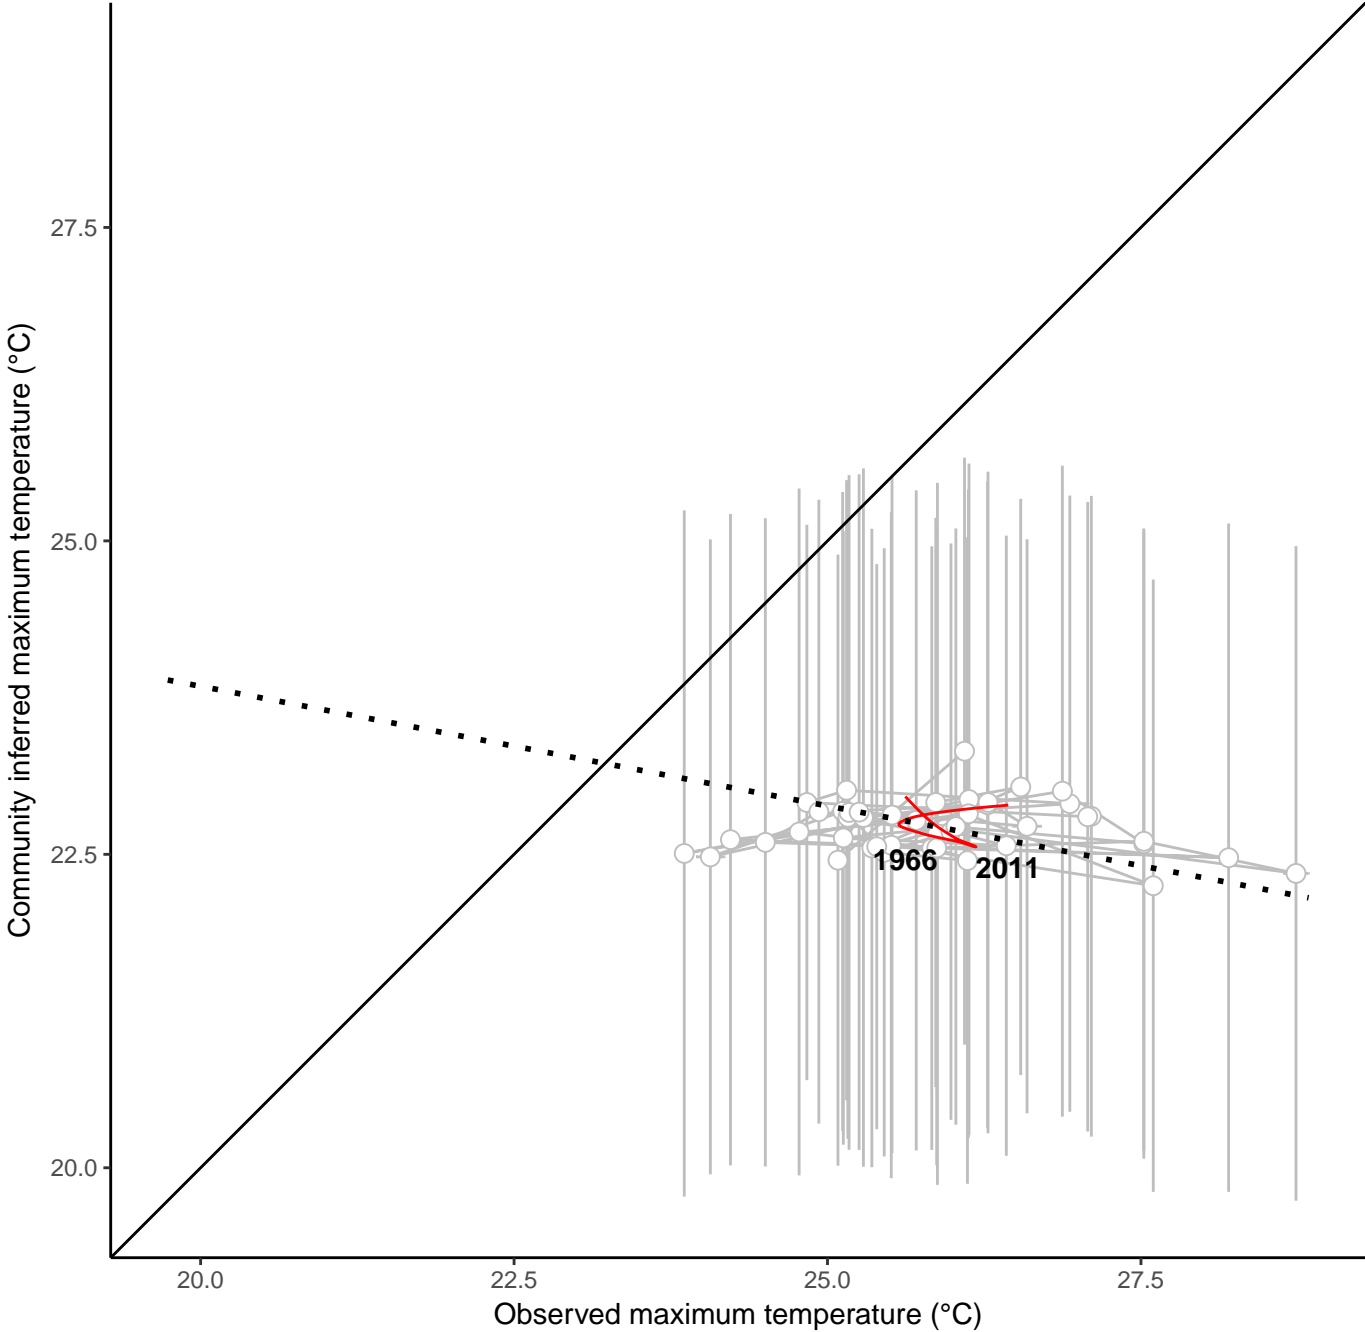

site : 840\_72\_29

absolute deviation = 1.17 | deviation change = 1.3 | maximum state number = 1

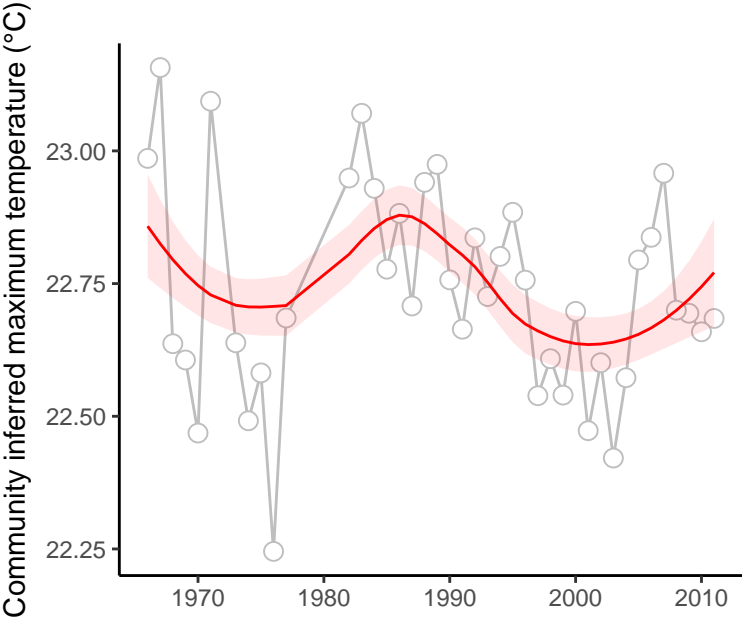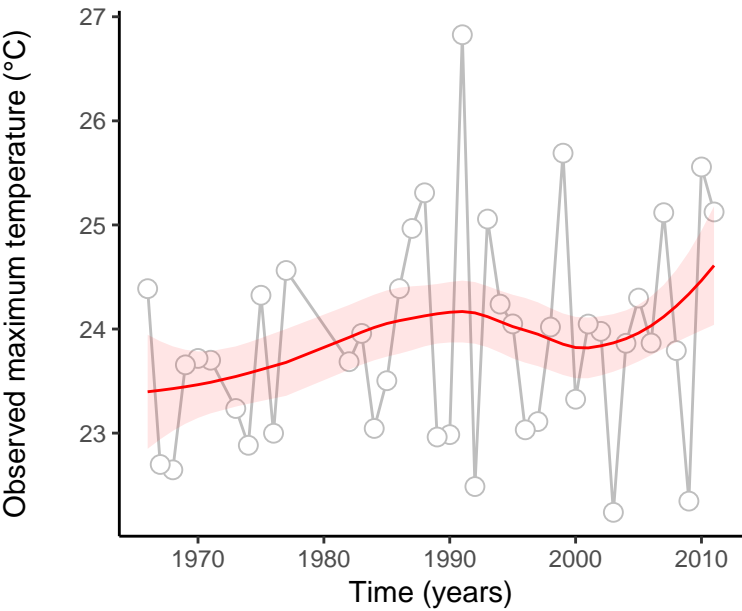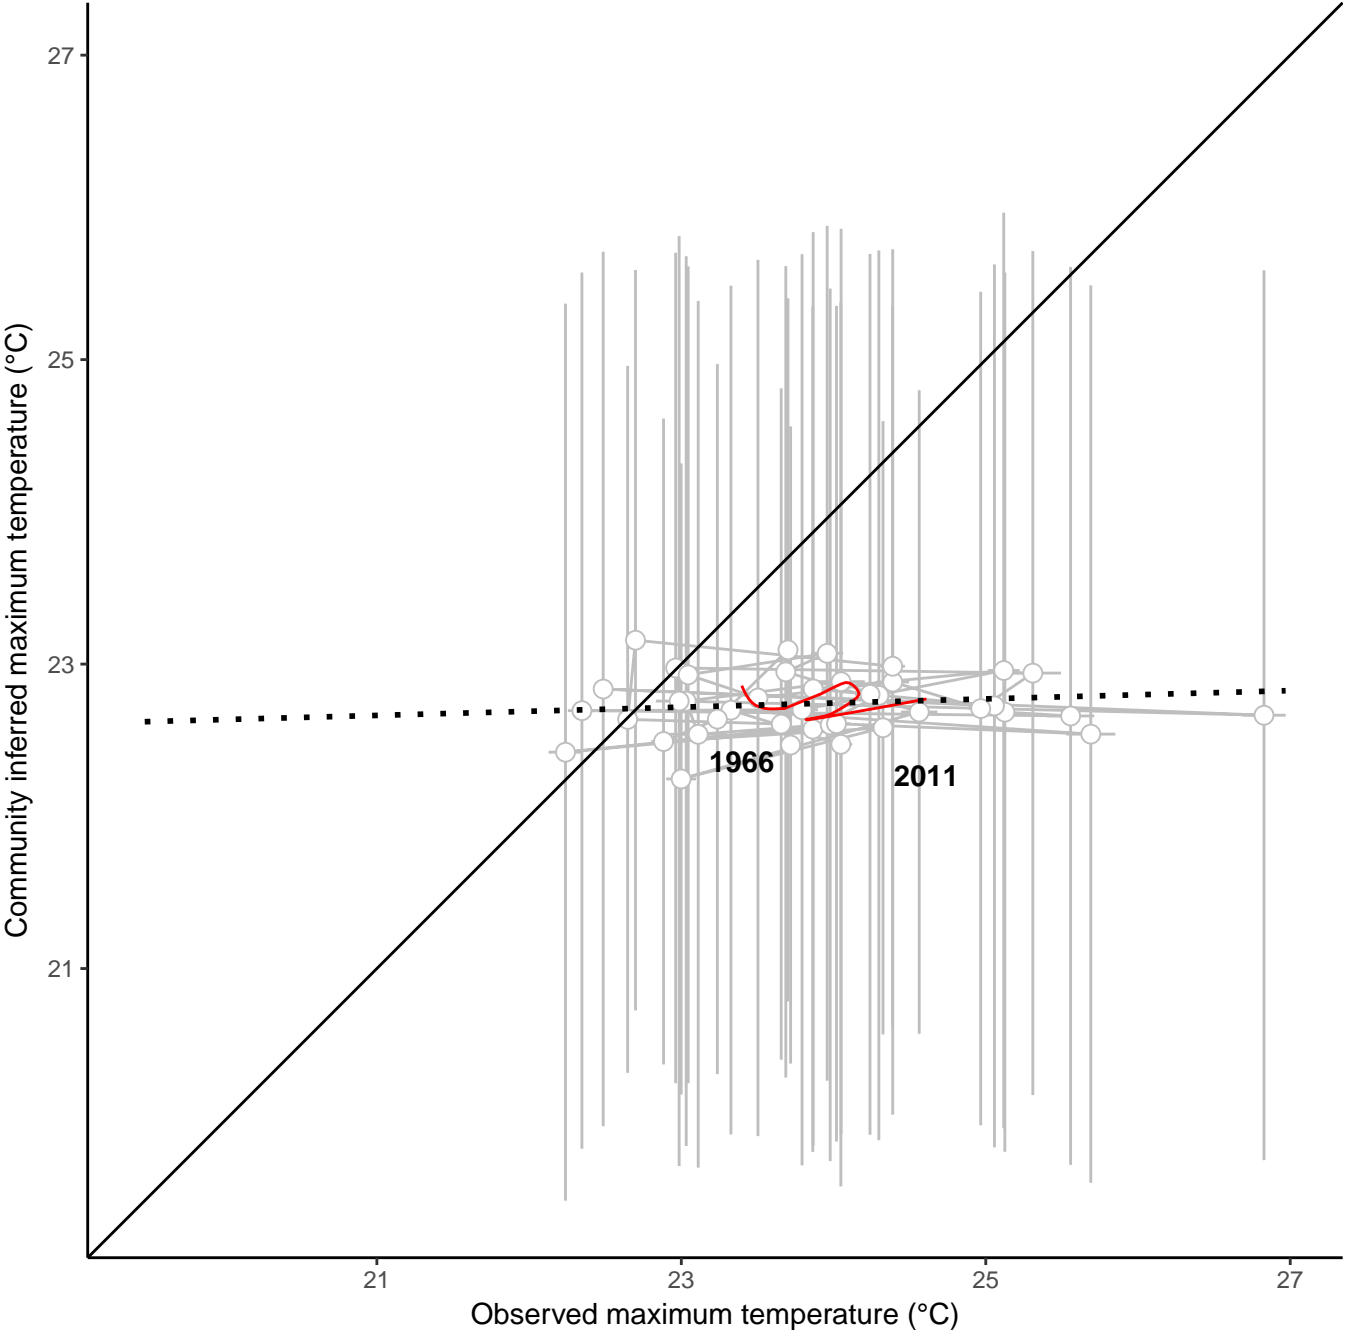

site : 840\_72\_39

absolute deviation = 0.59 | deviation change = 1.38 | maximum state number = 1

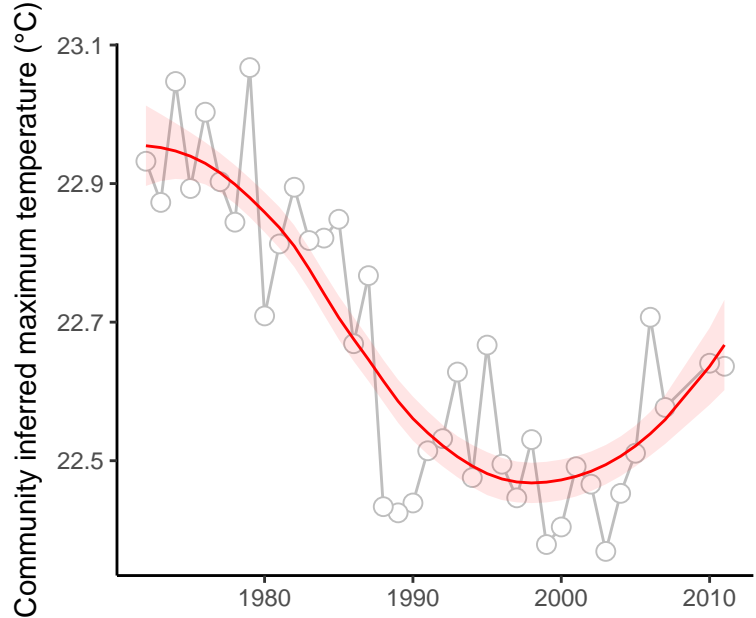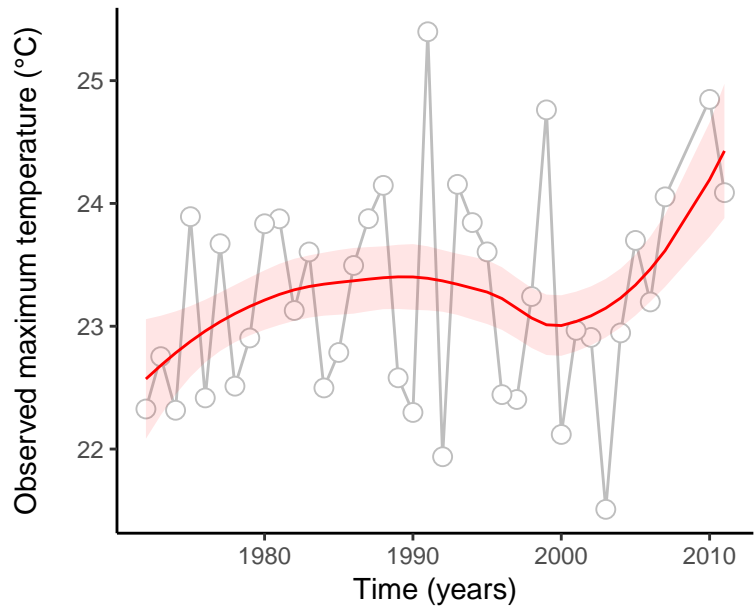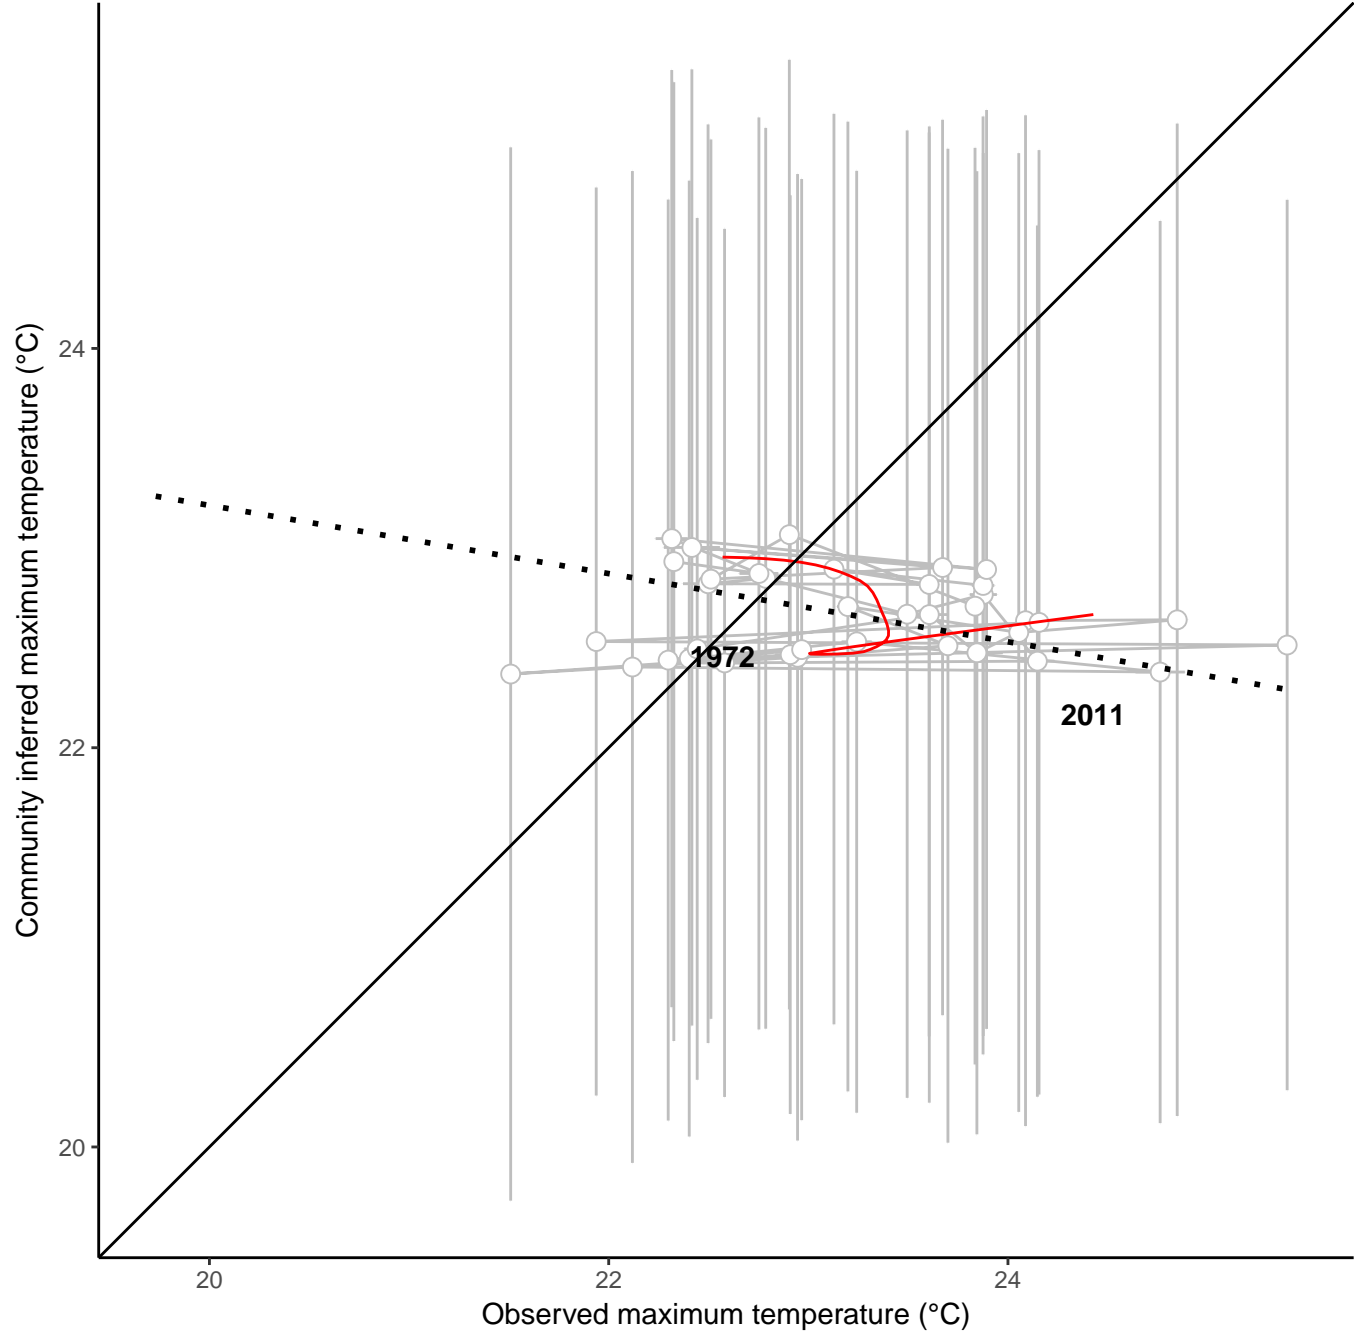

site : 840\_82\_27

absolute deviation = 2.98 | deviation change = 0.72 | maximum state number = 1

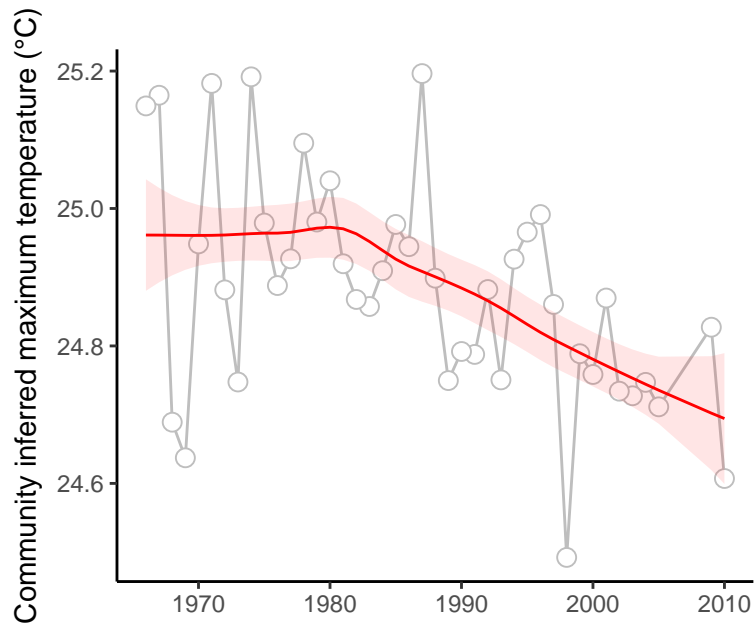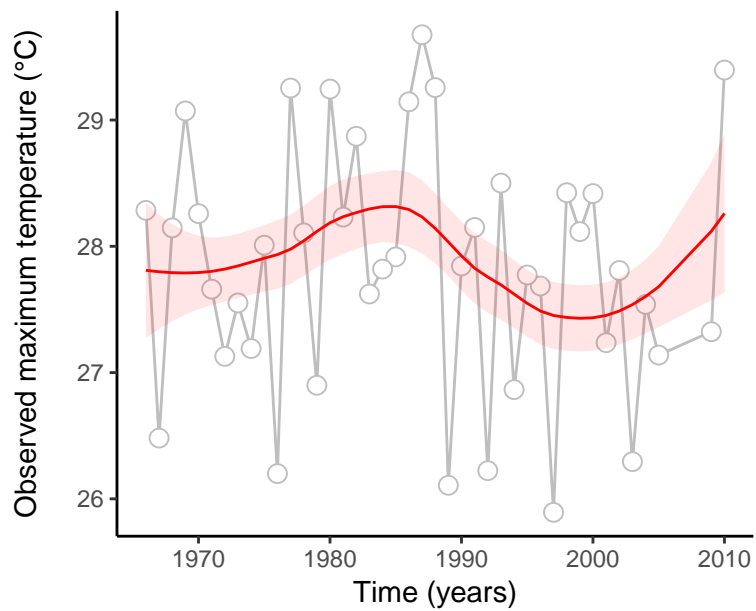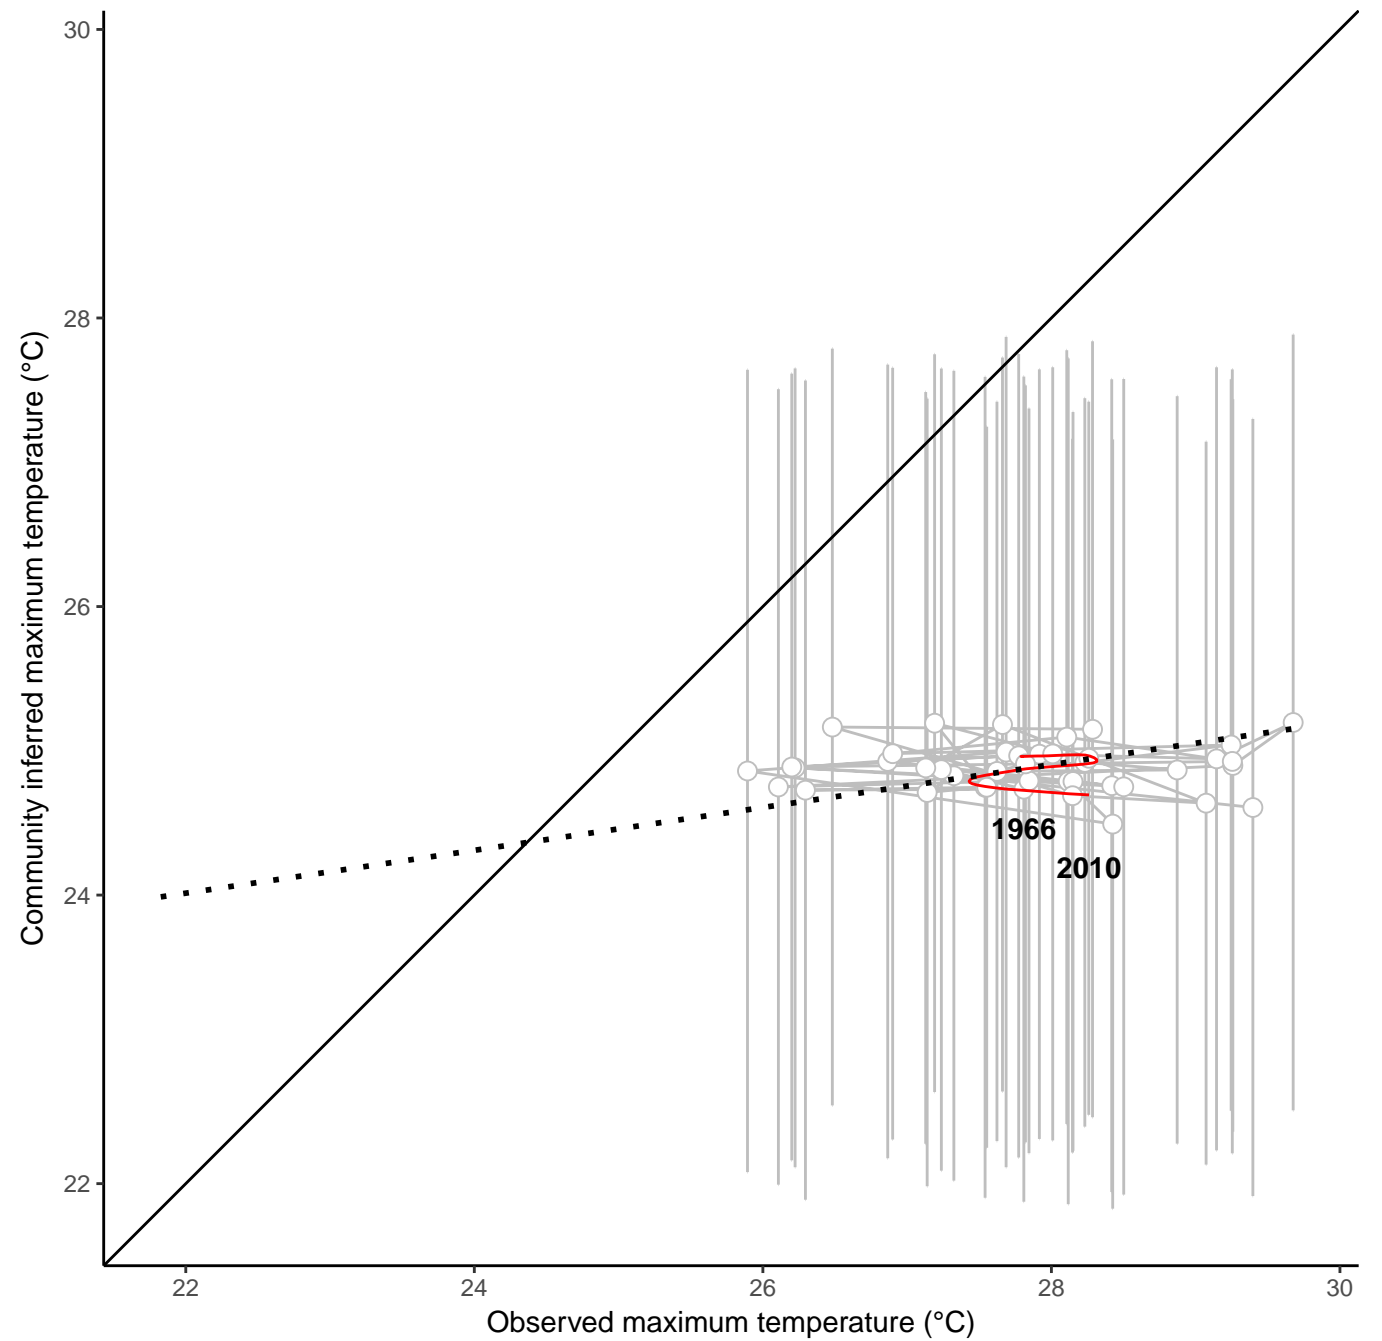

site : 840\_83\_60

absolute deviation = 5.25 | deviation change = 2.1 | maximum state number = 1

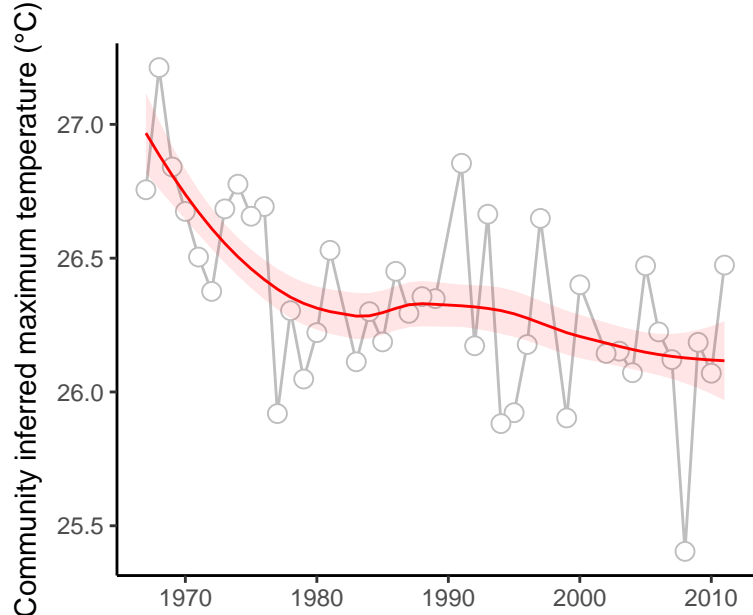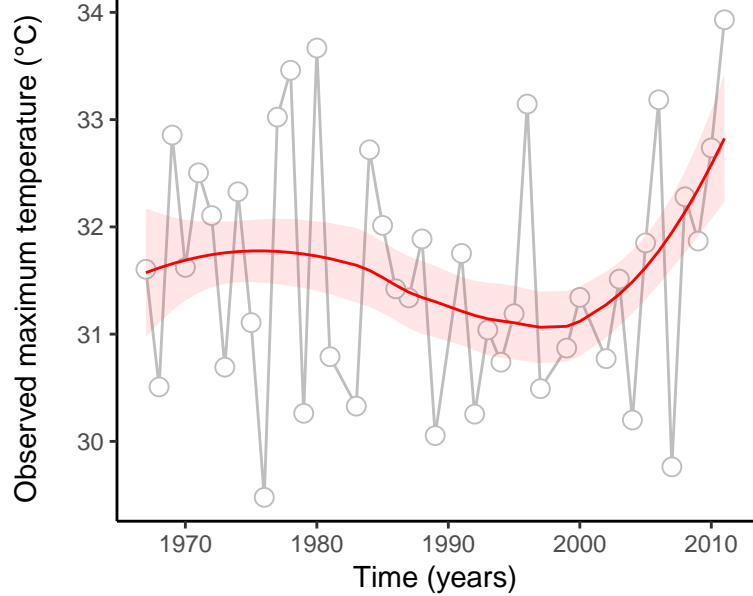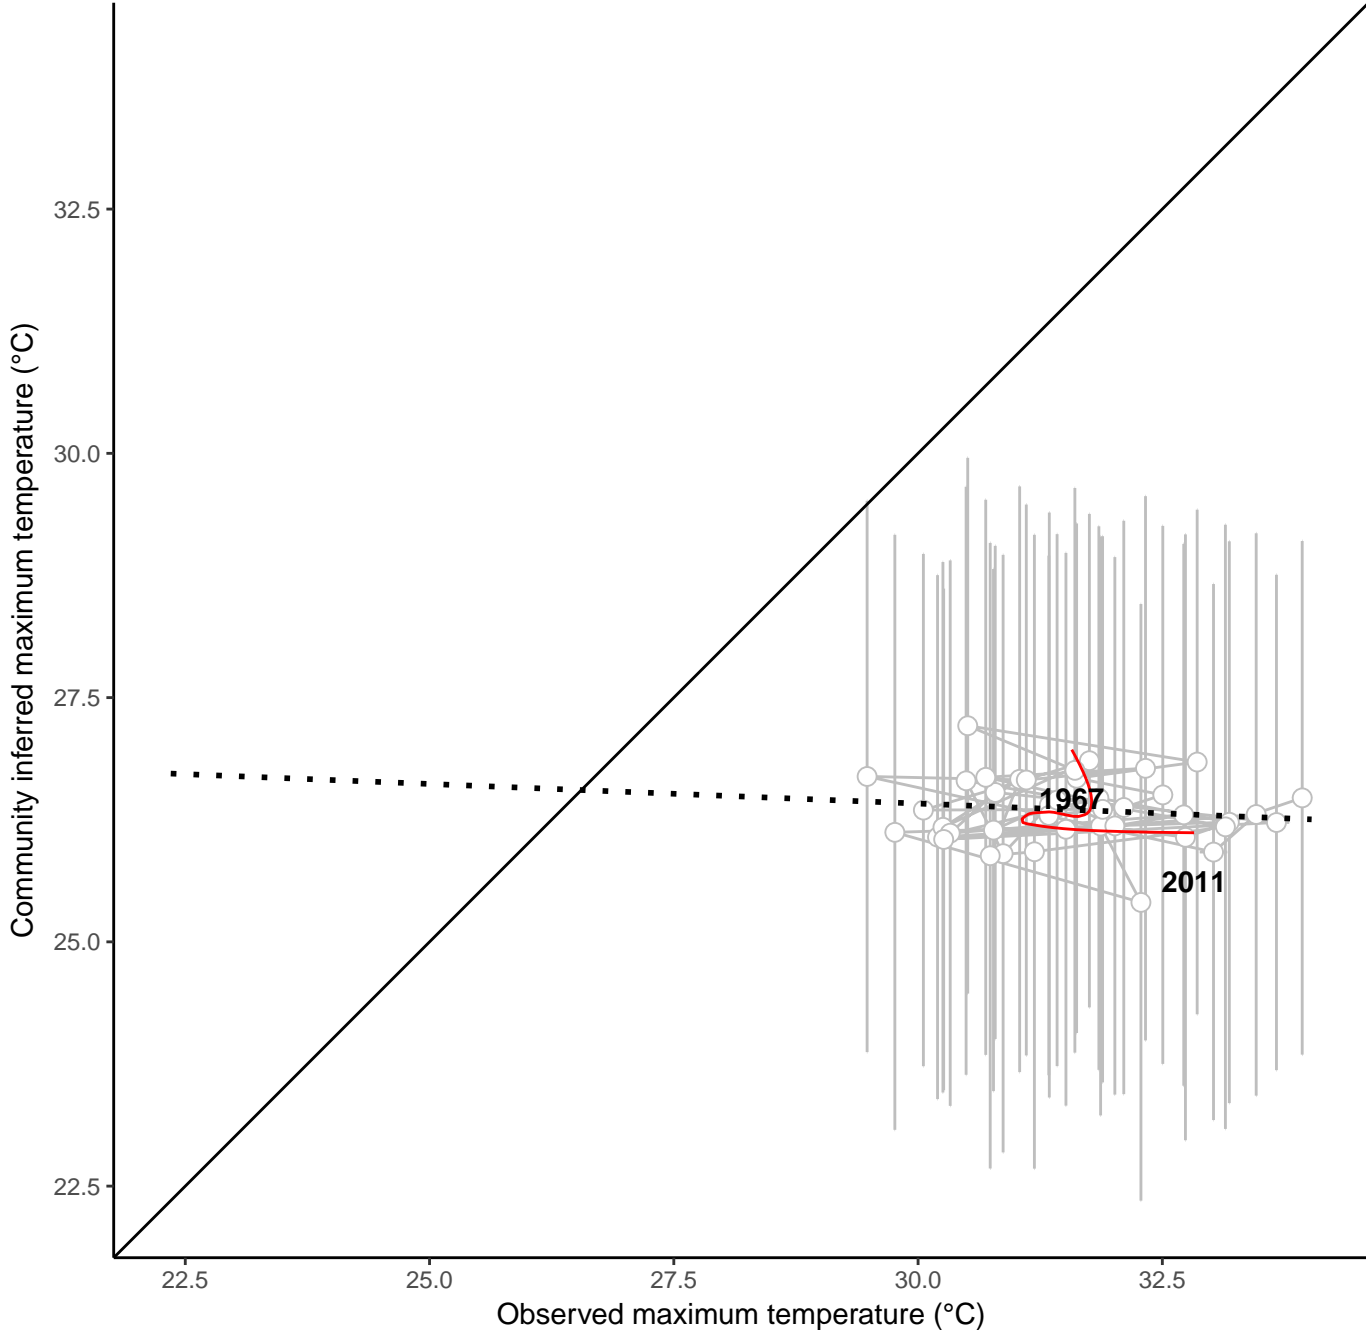

site : 840\_18\_1

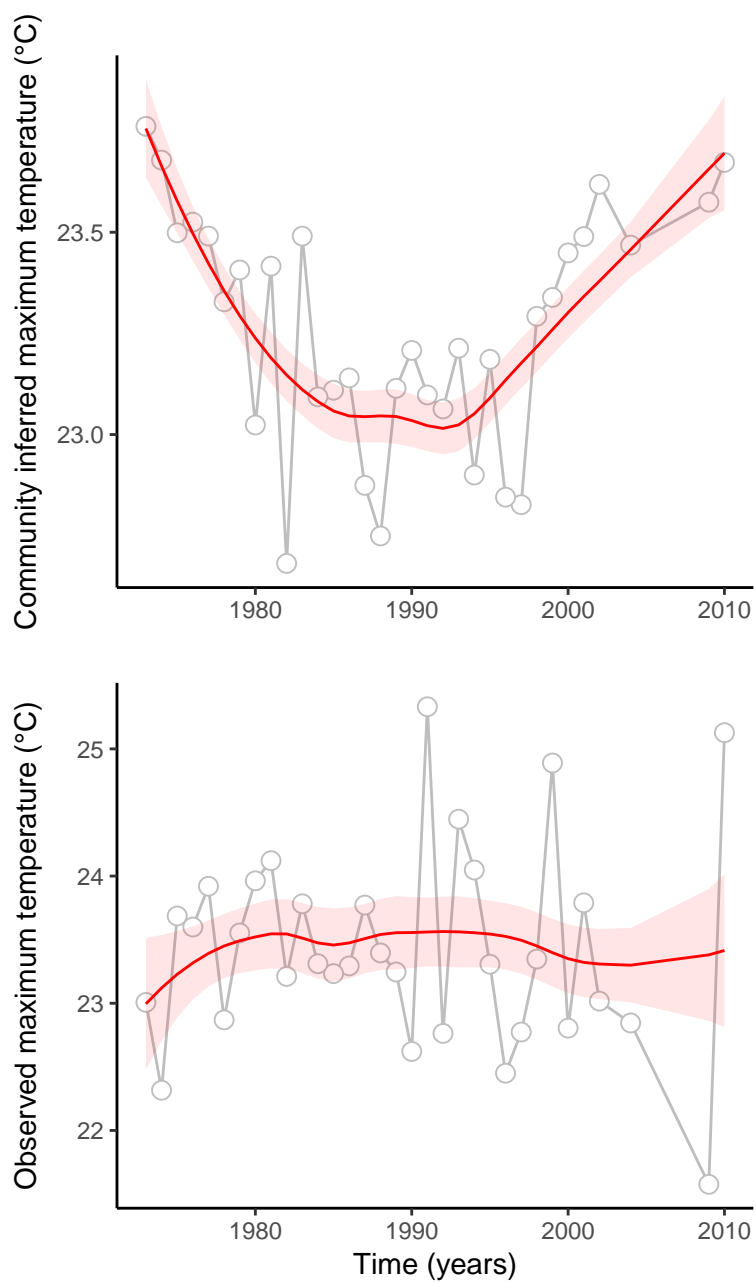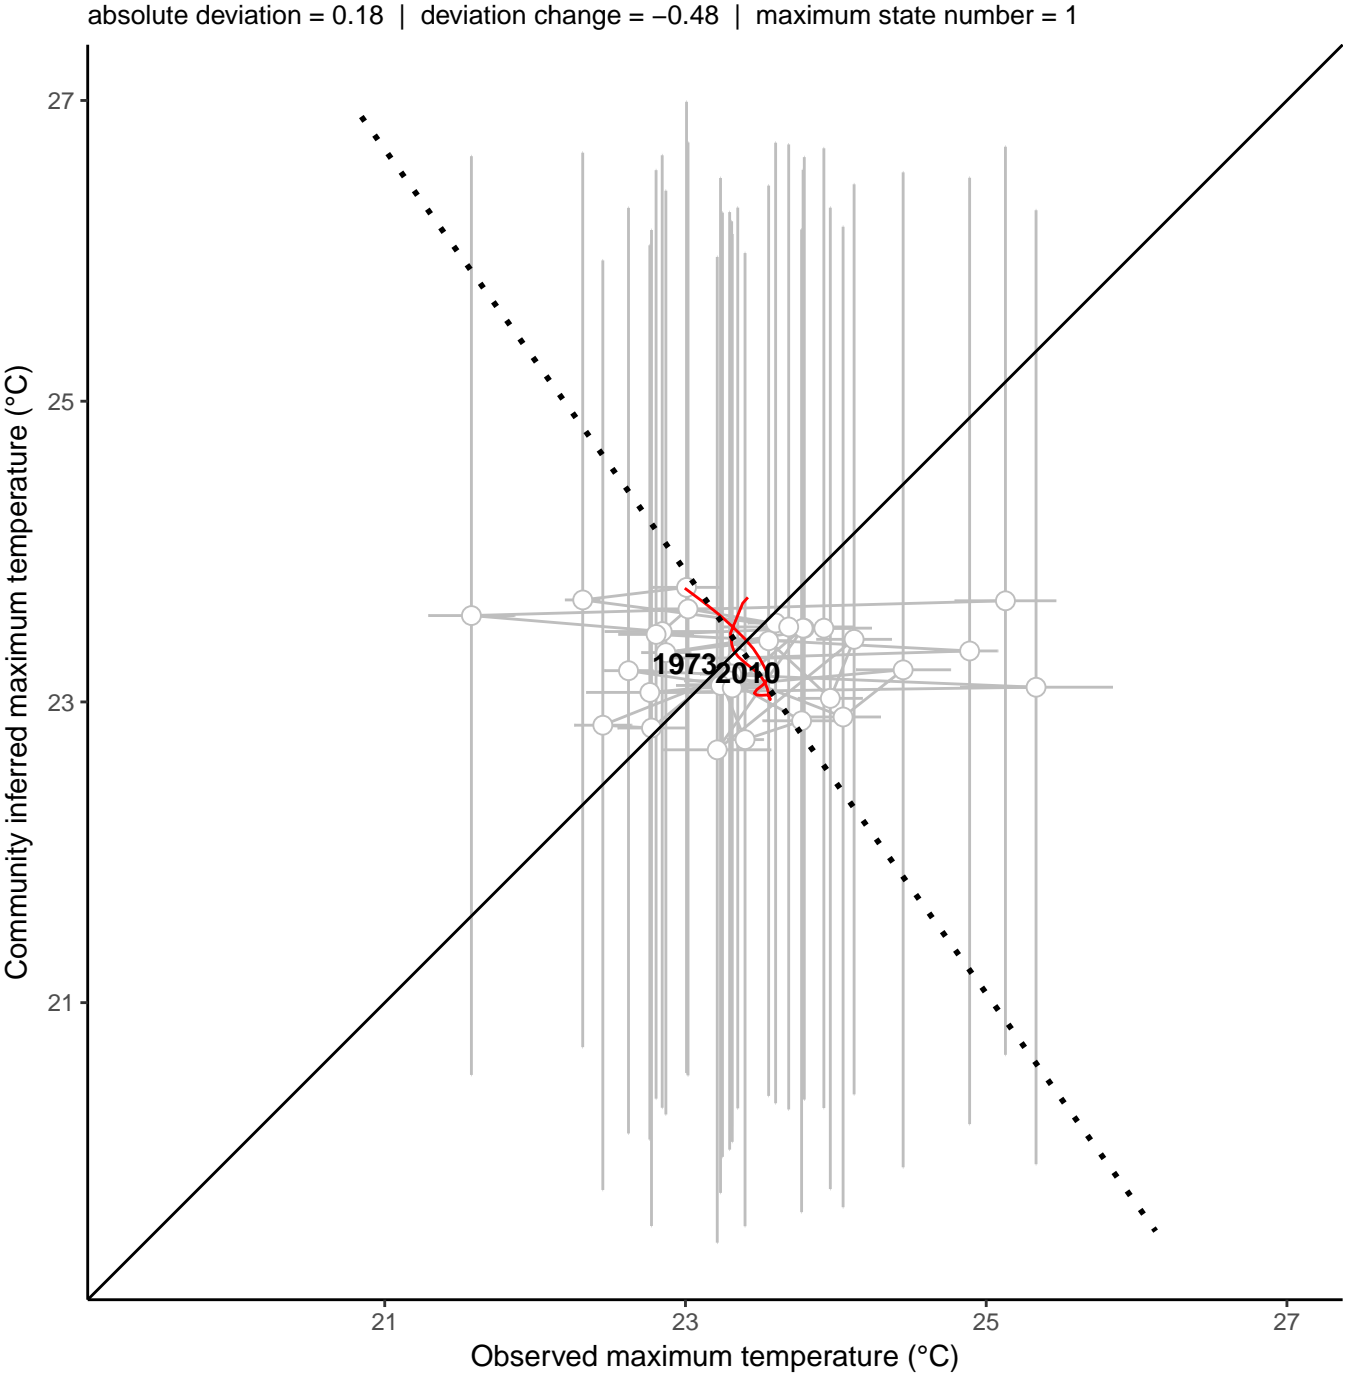

site : 840\_2\_32

absolute deviation = 5 | deviation change = 0.69 | maximum state number = 1

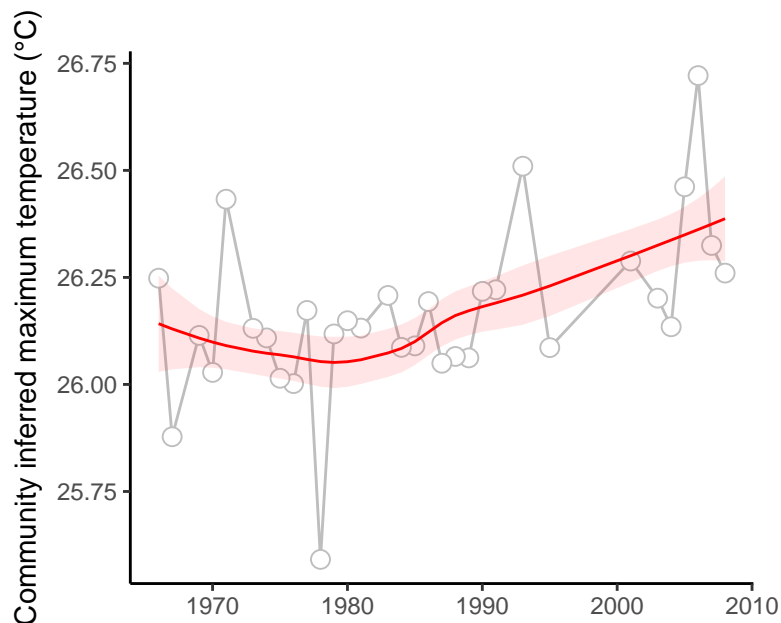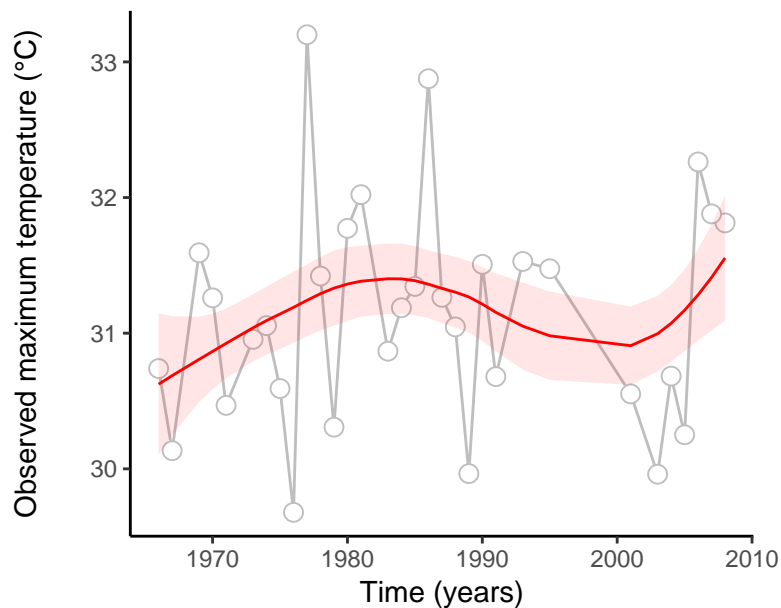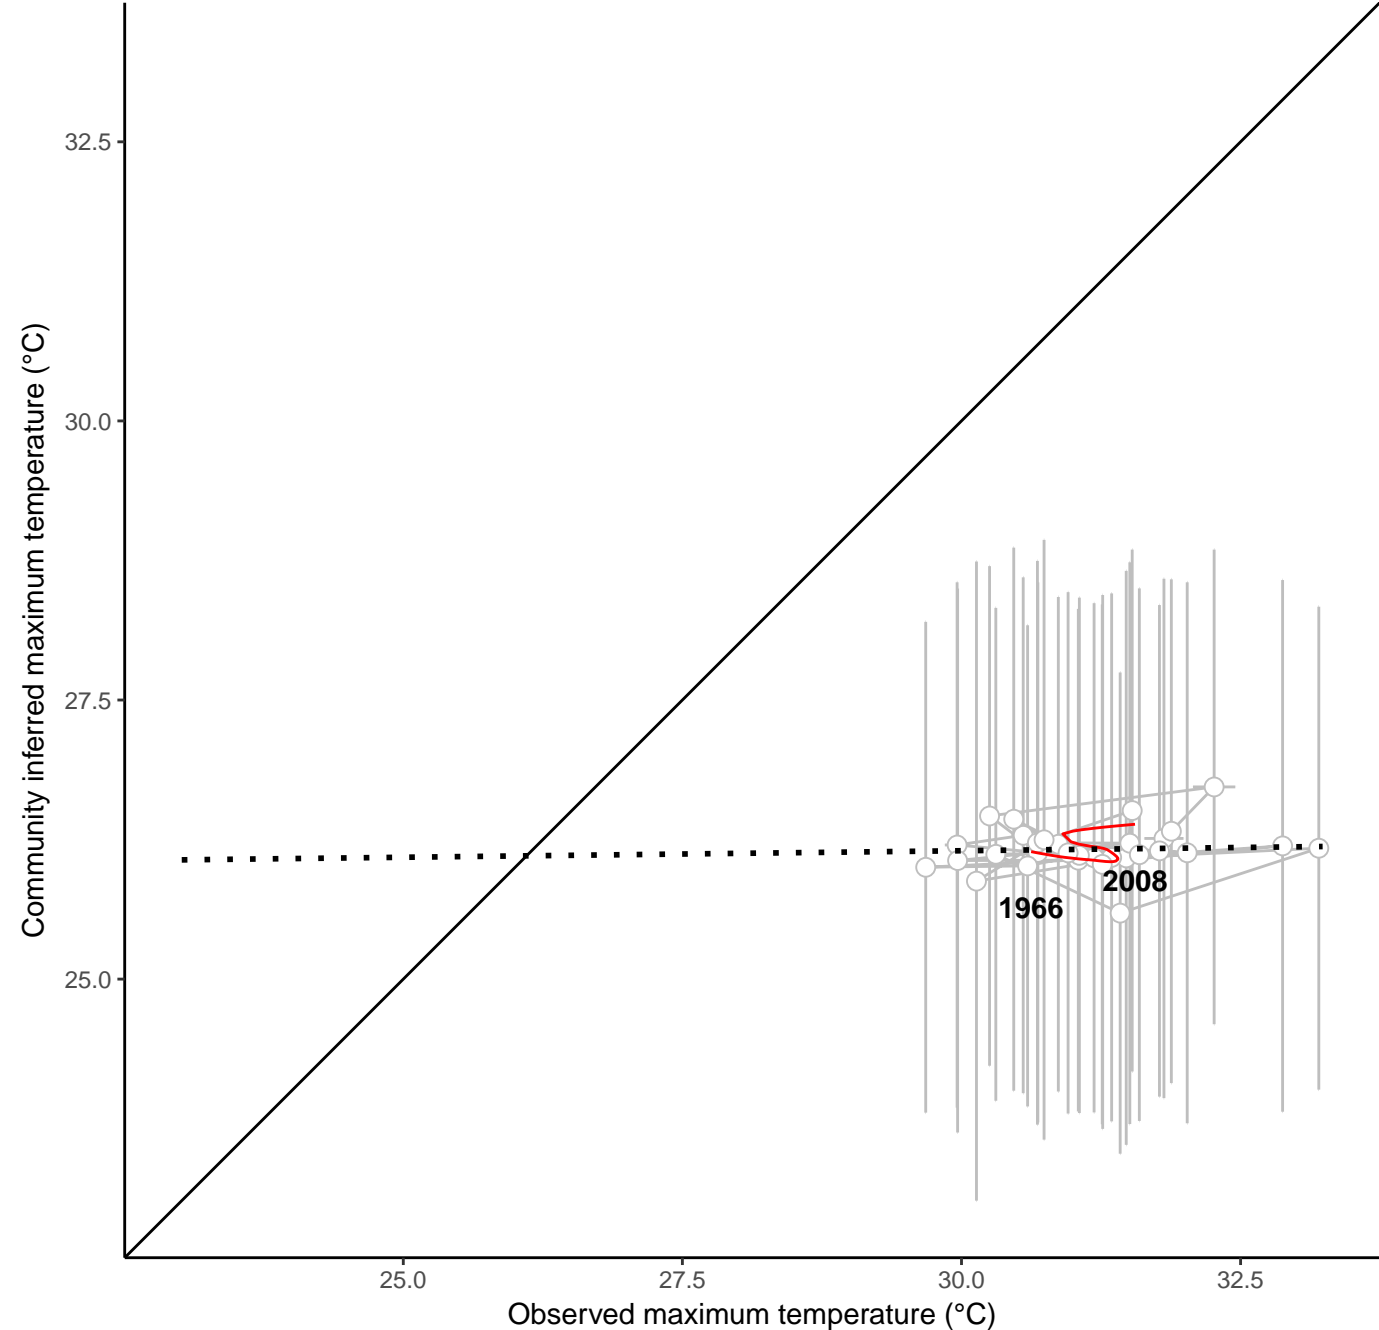

site : 840\_33\_16

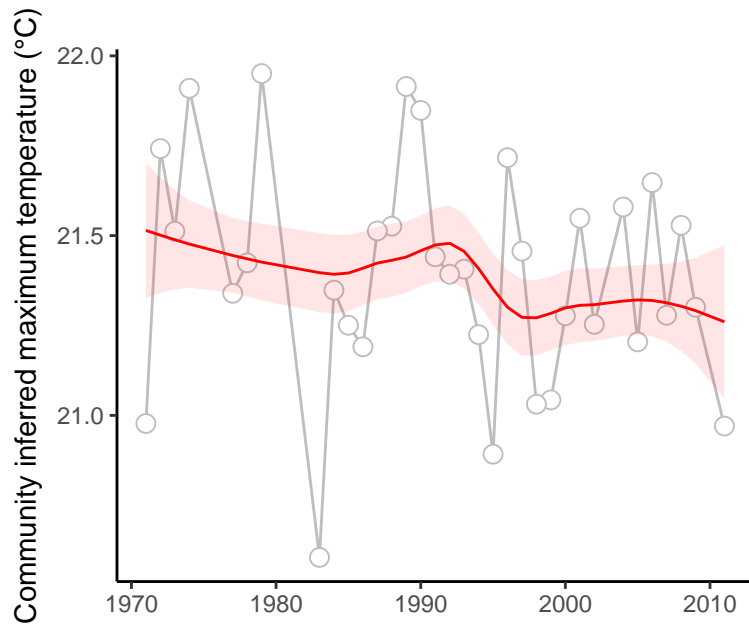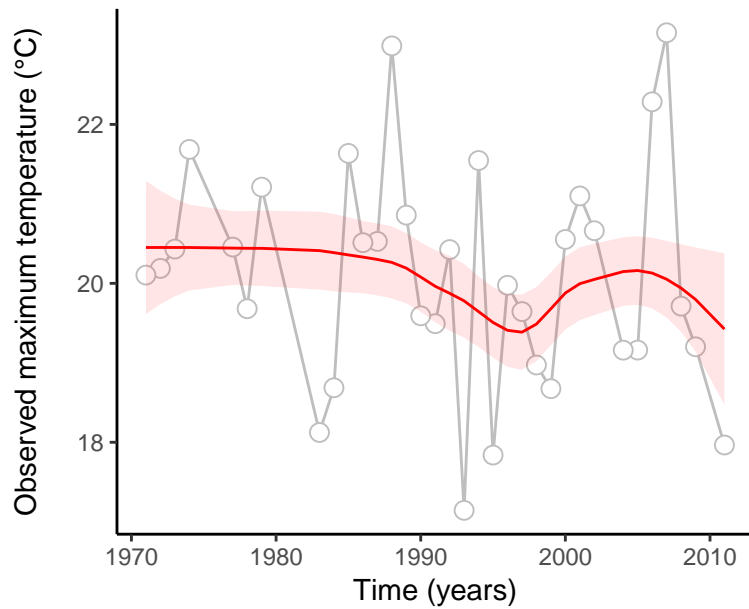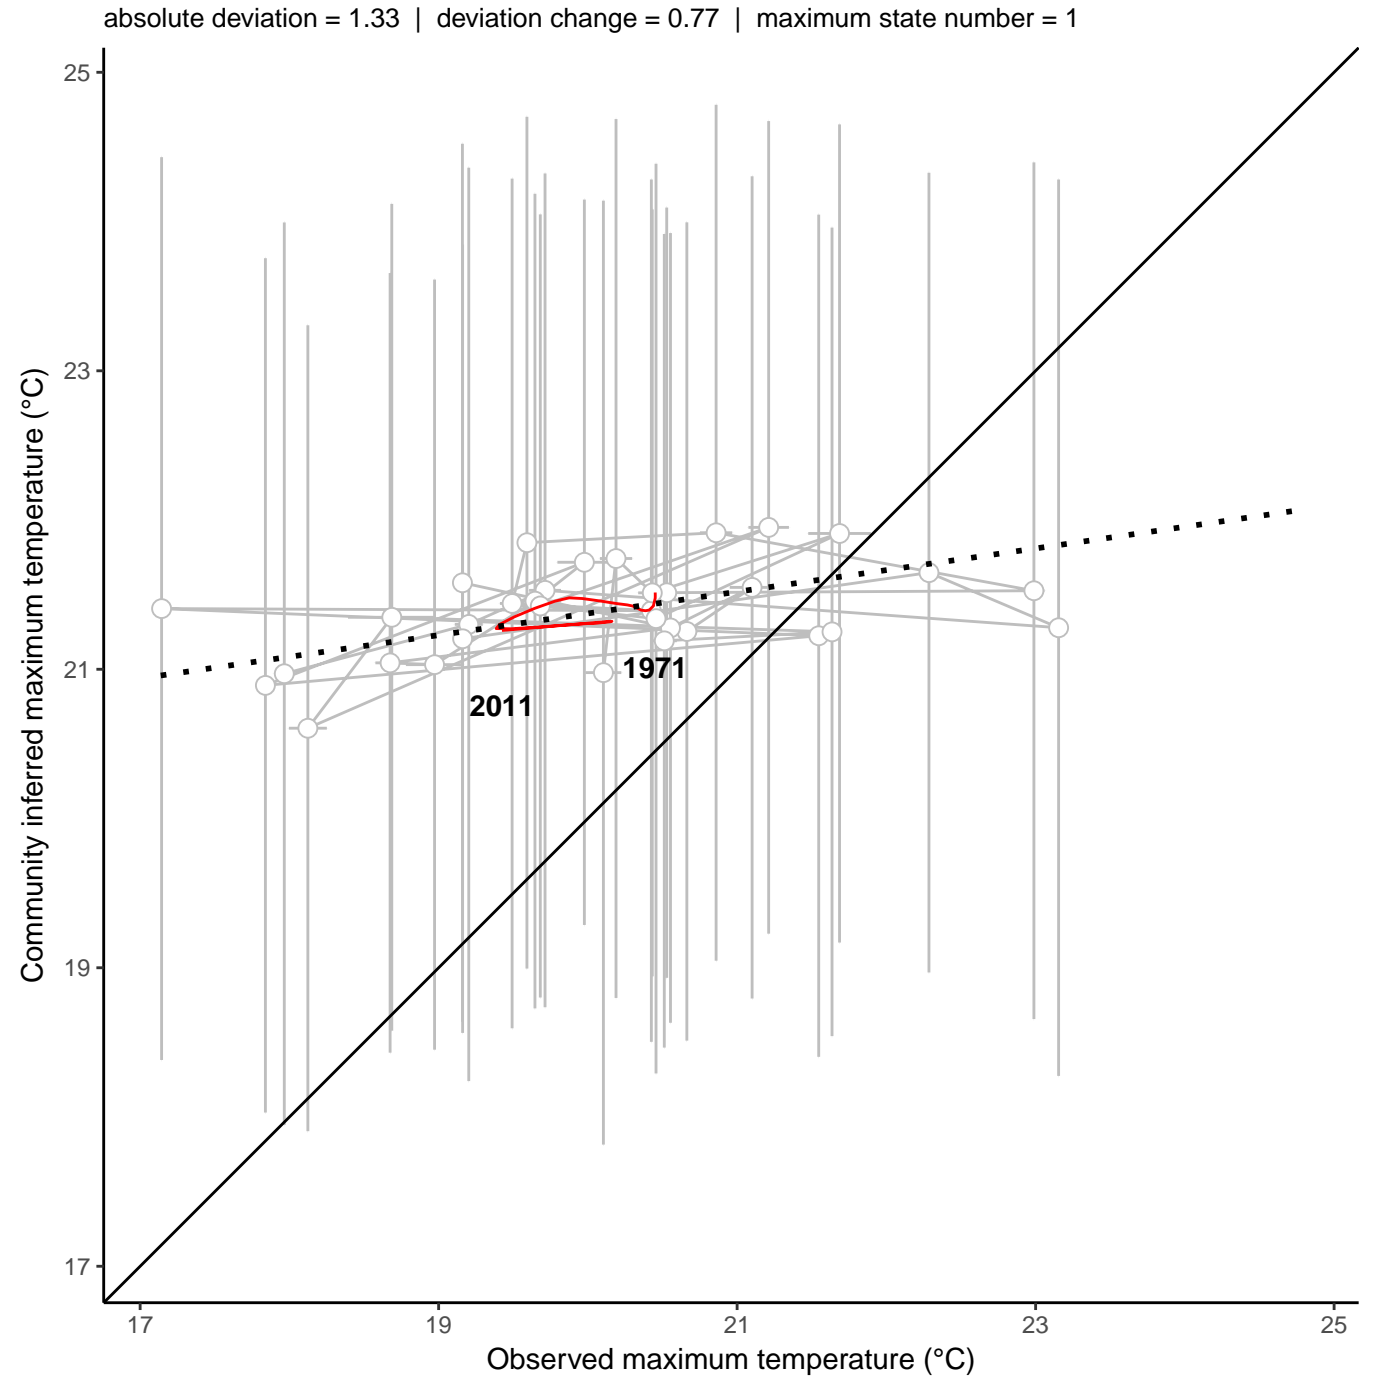



site : 840\_38\_3

absolute deviation = 3.29 | deviation change = 0.18 | maximum state number = 1

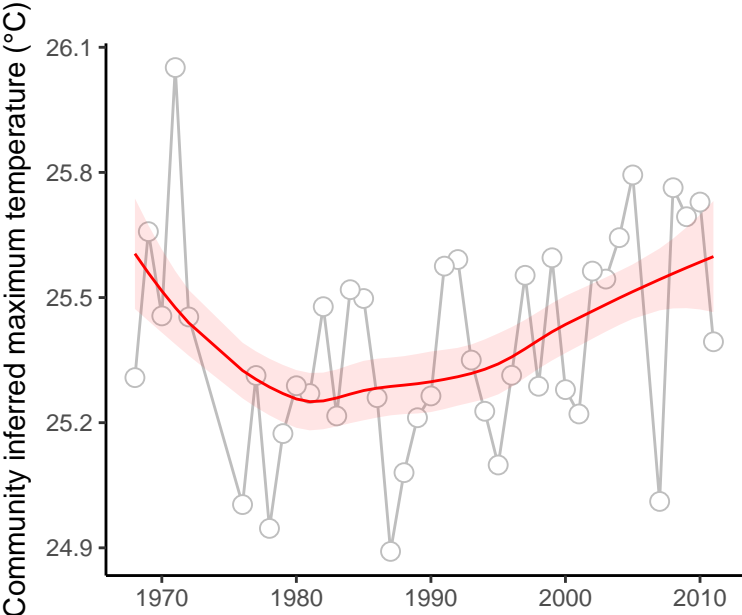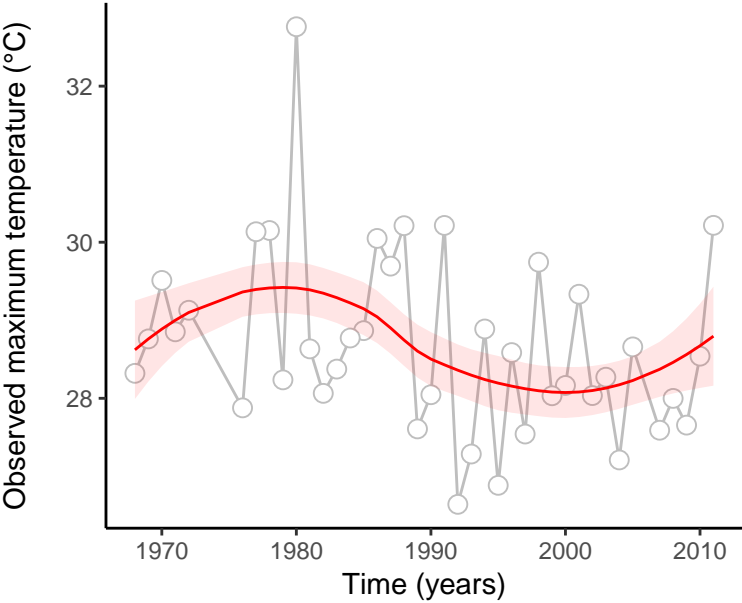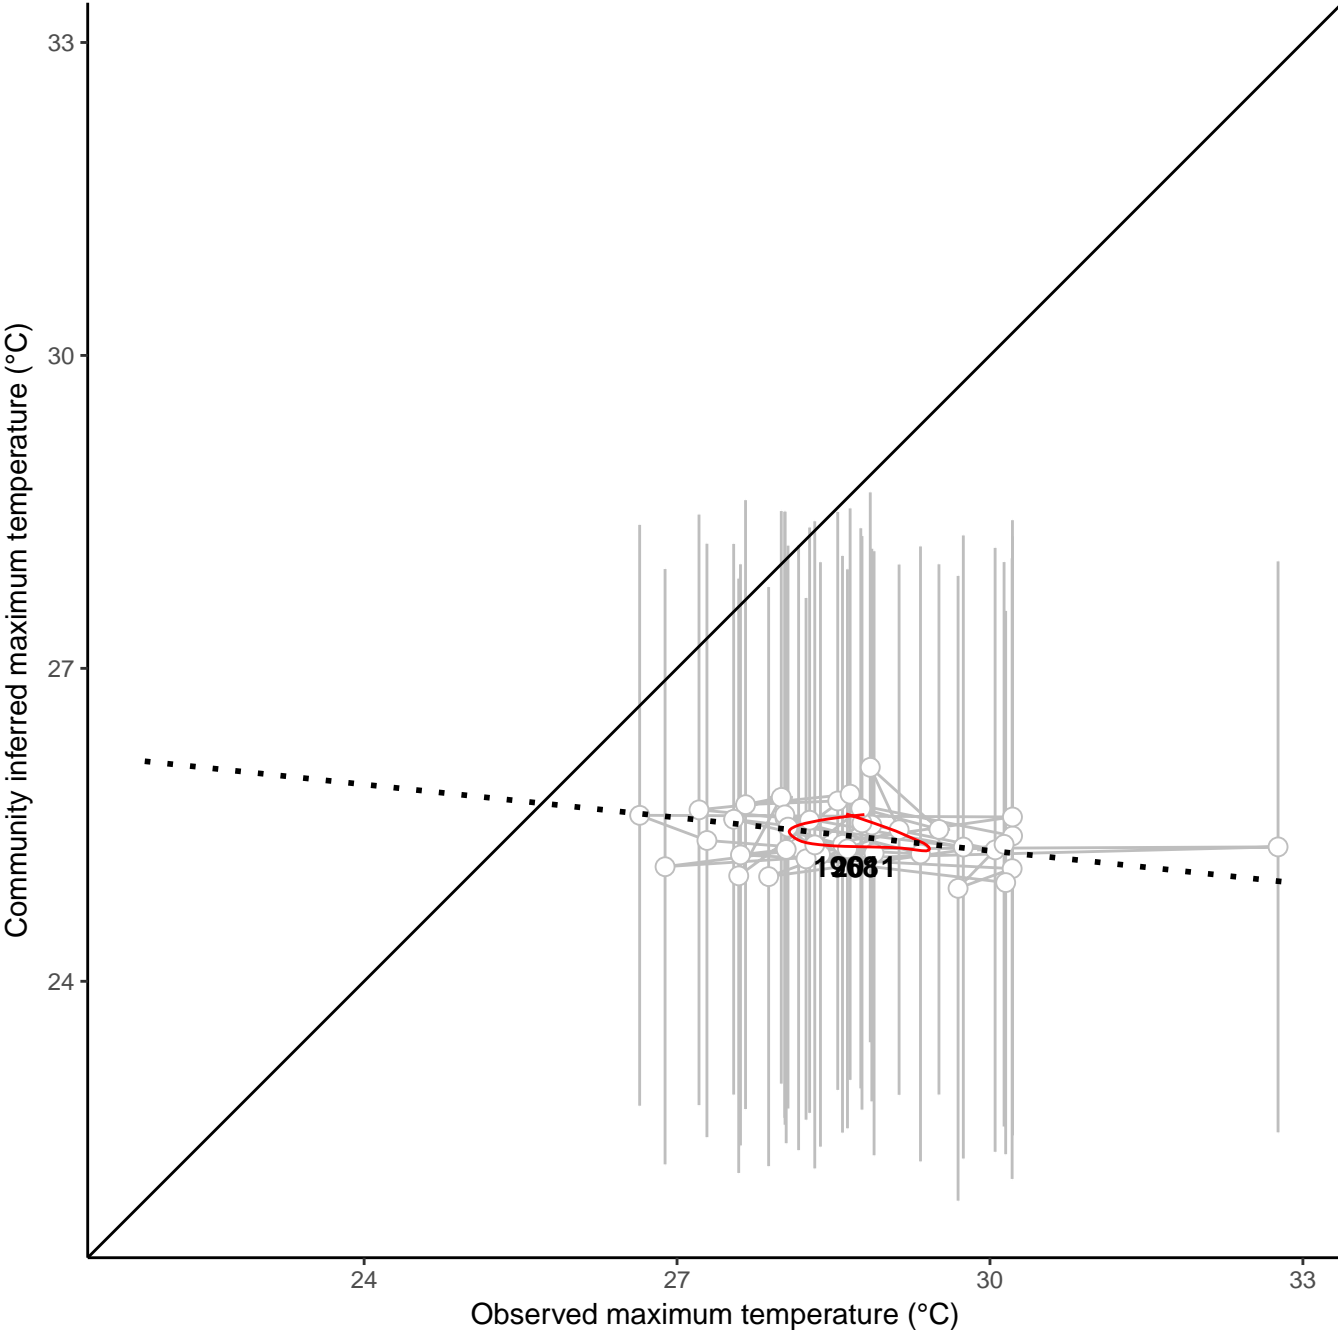

site : 840\_46\_22

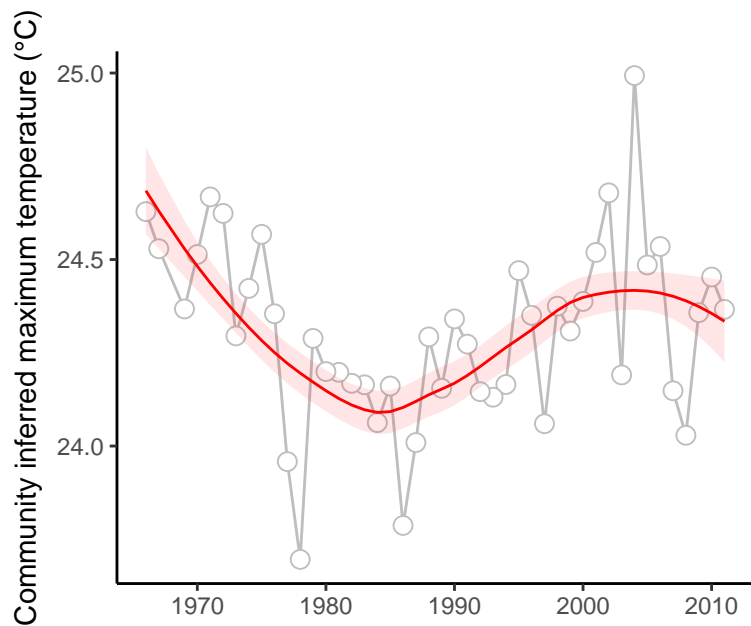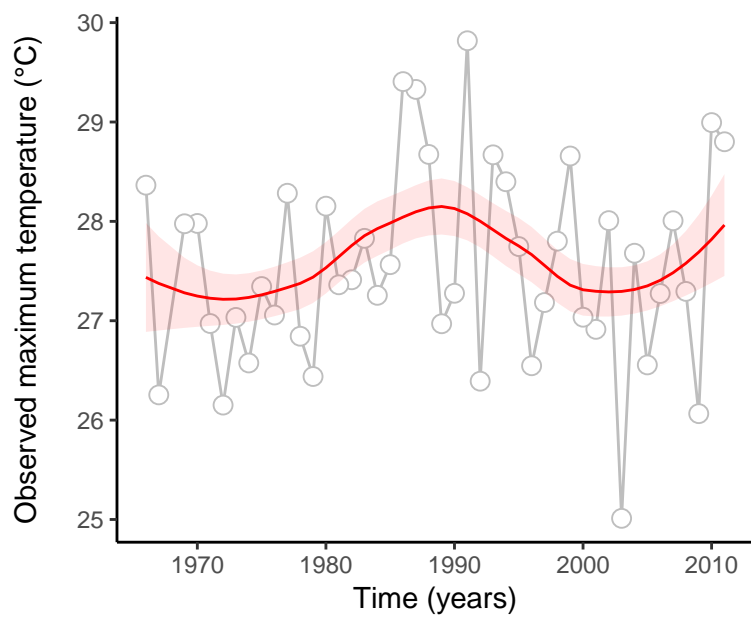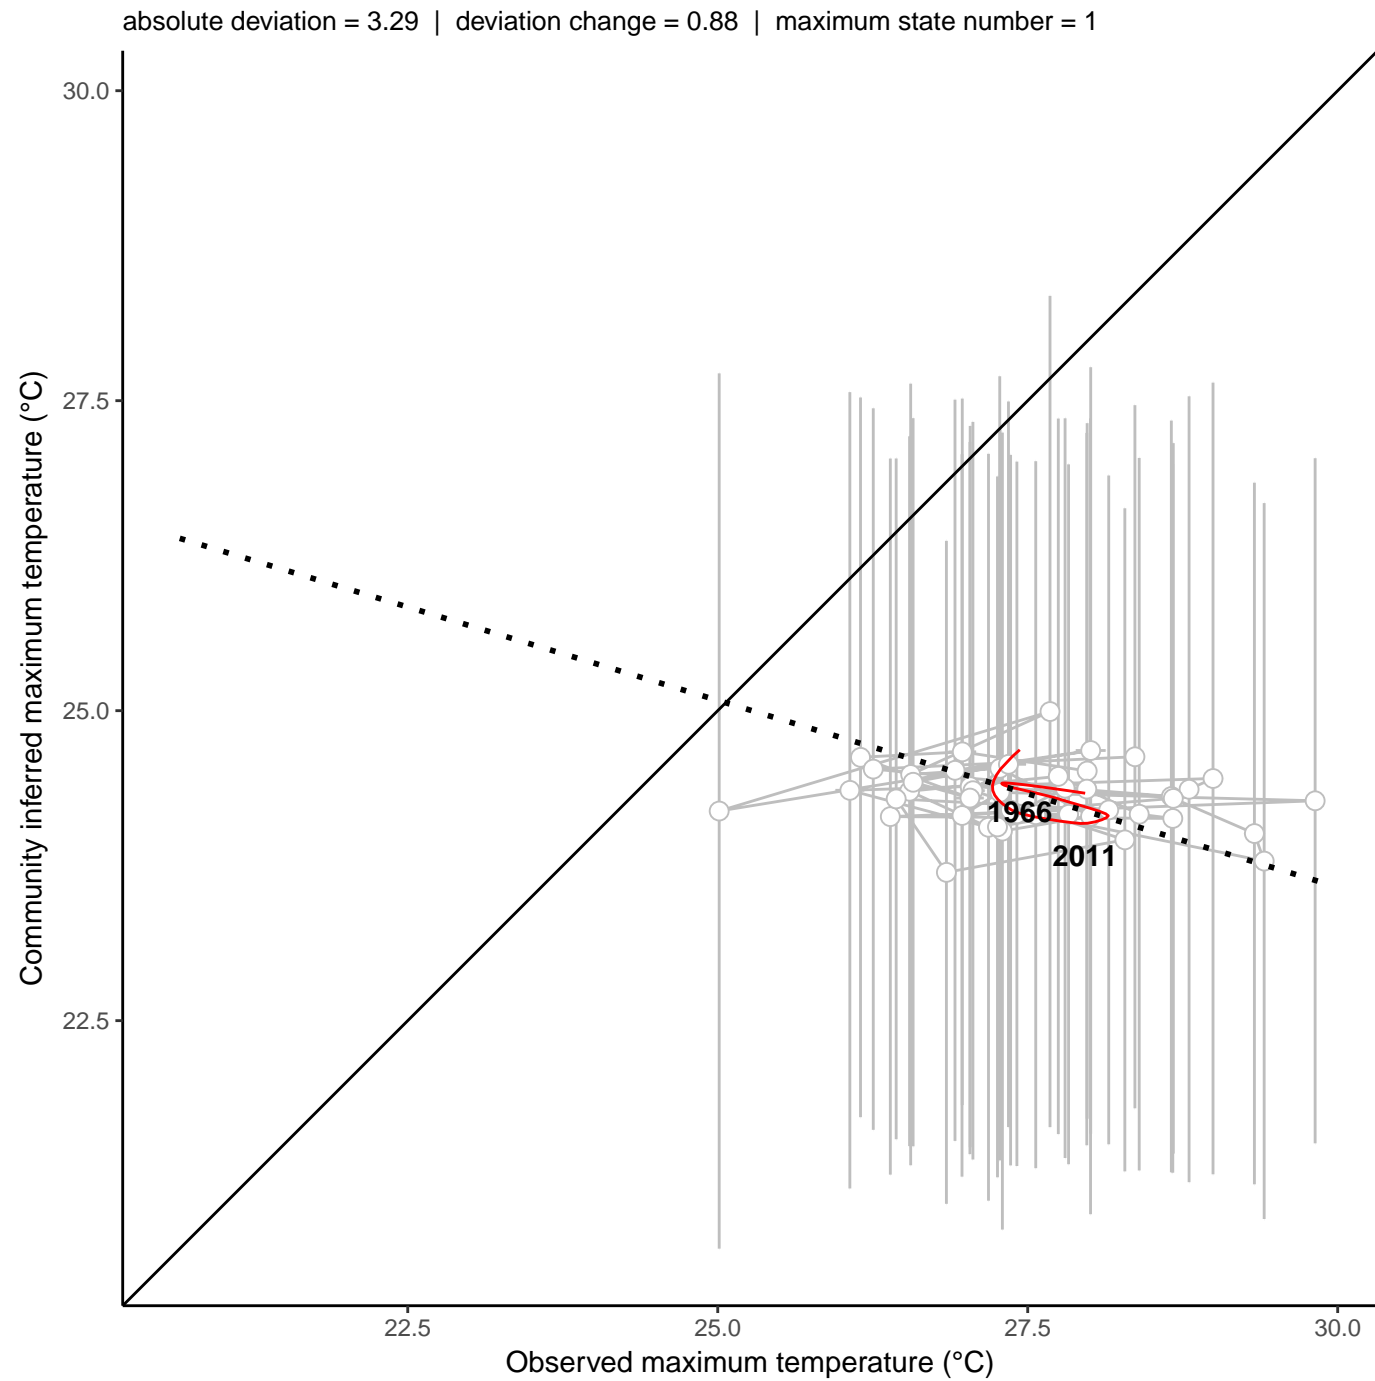

site : 840\_47\_21

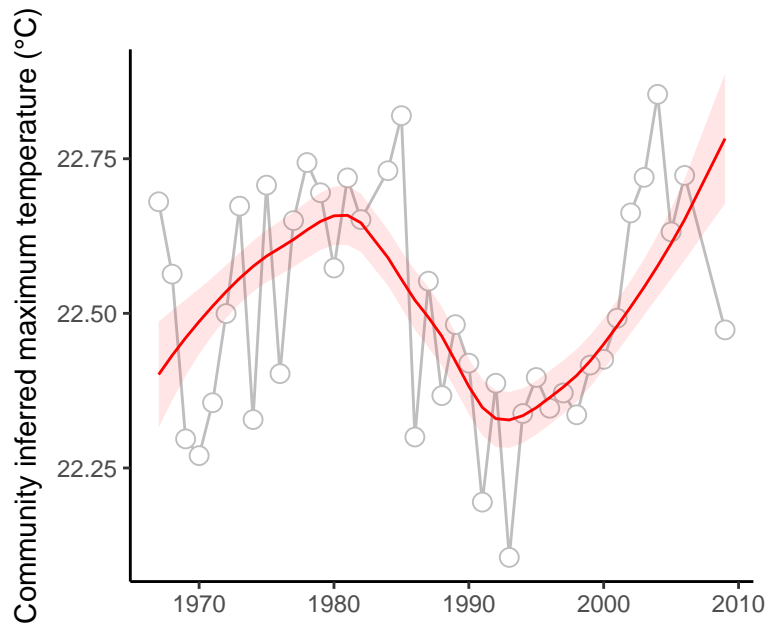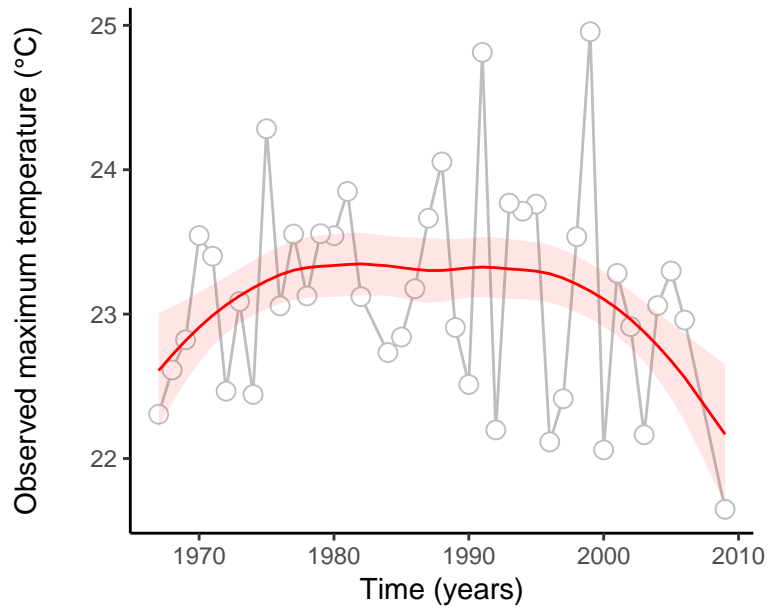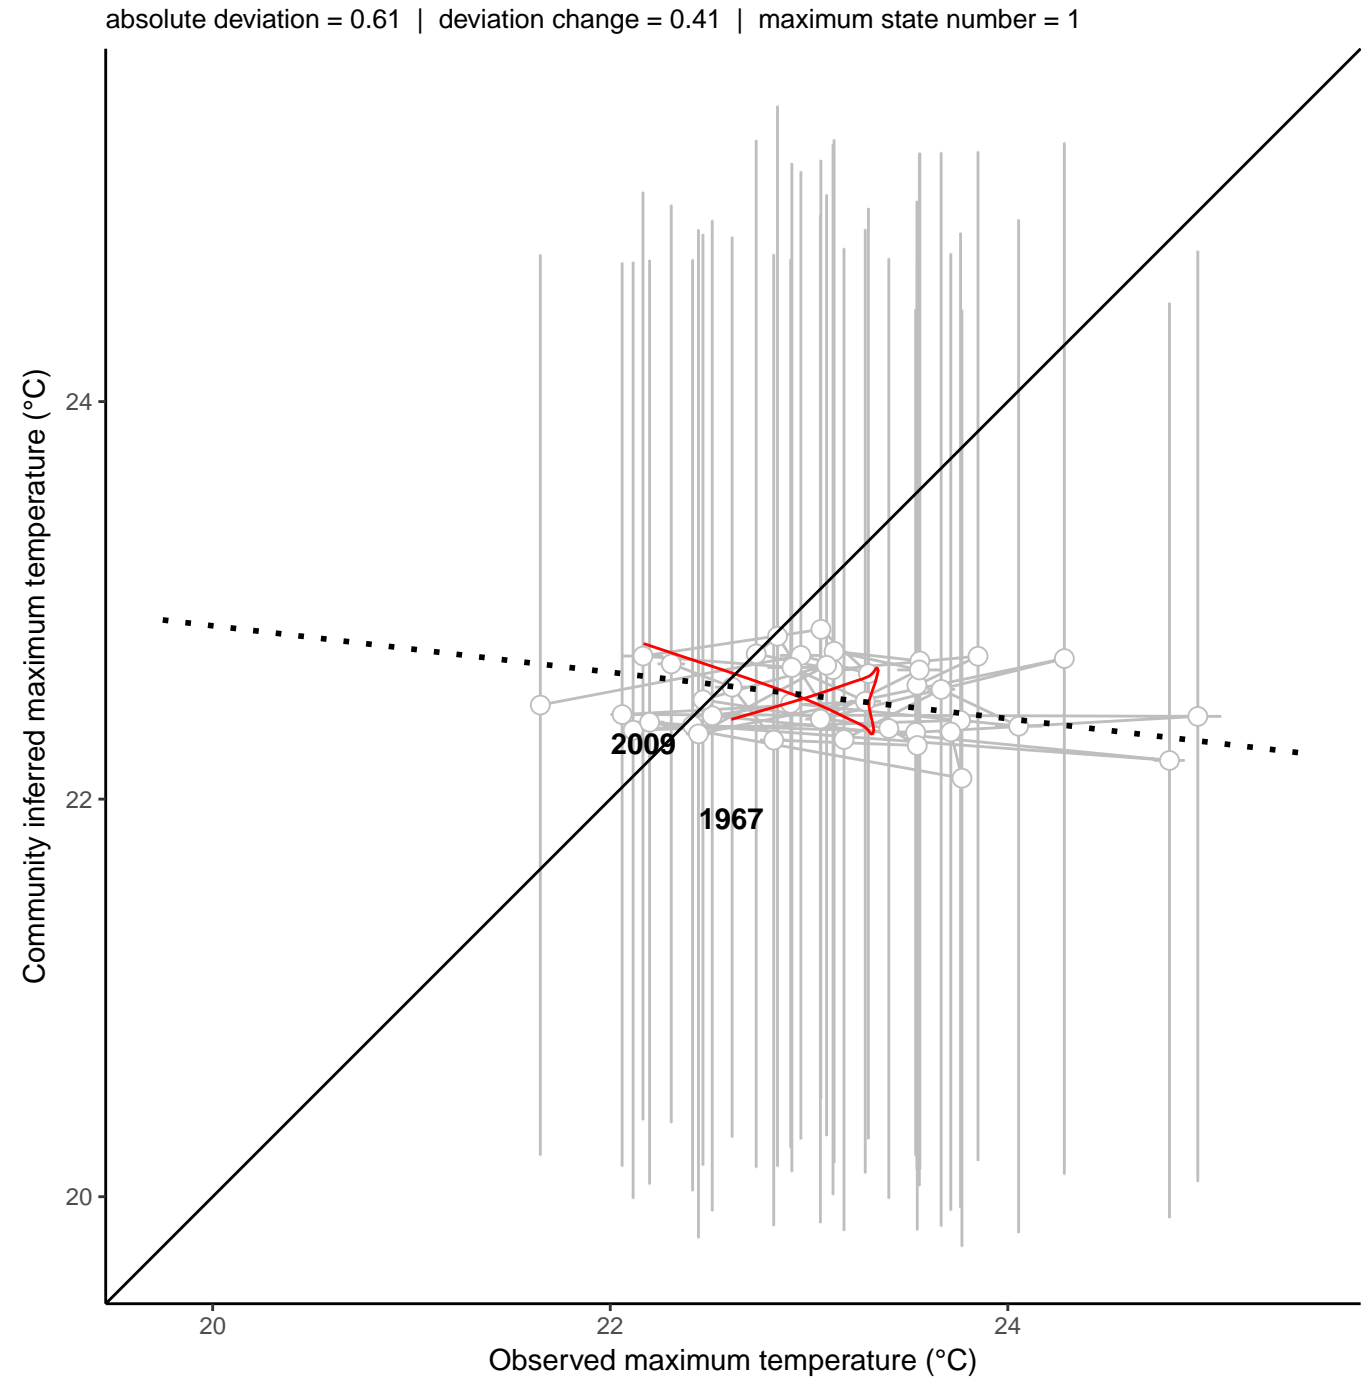

site : 840\_49\_22

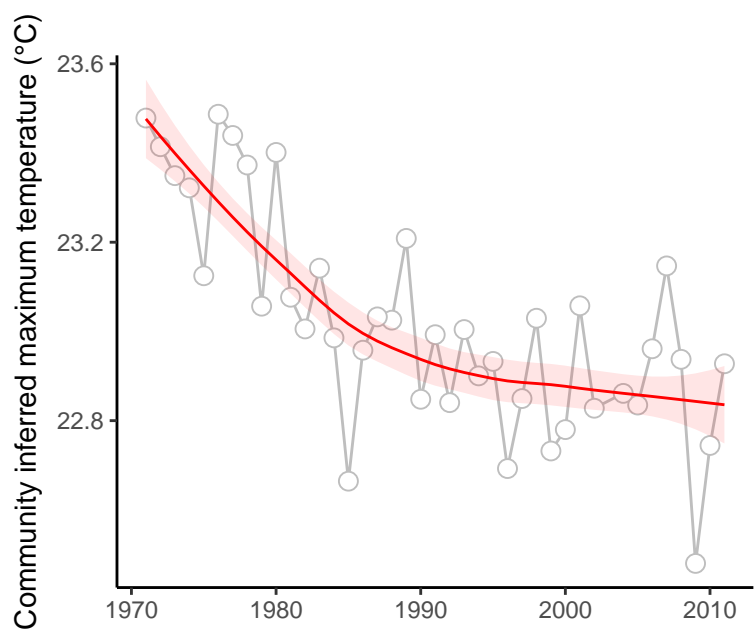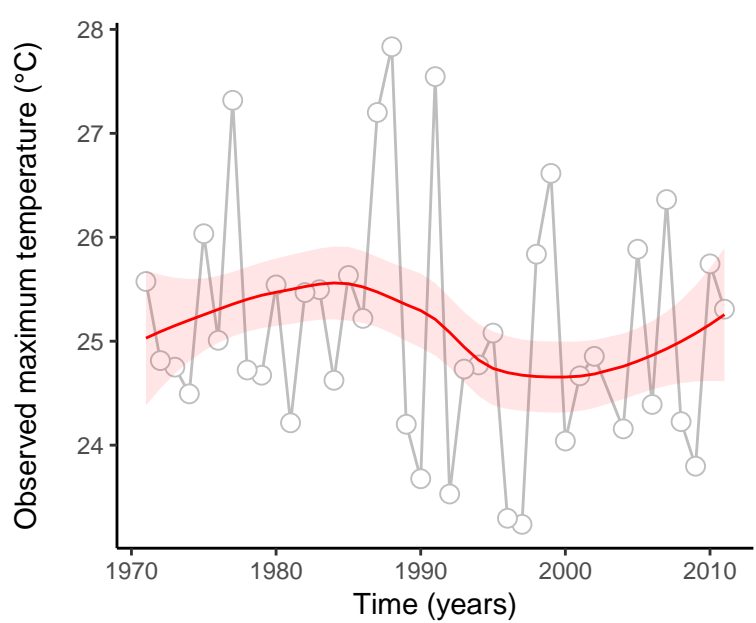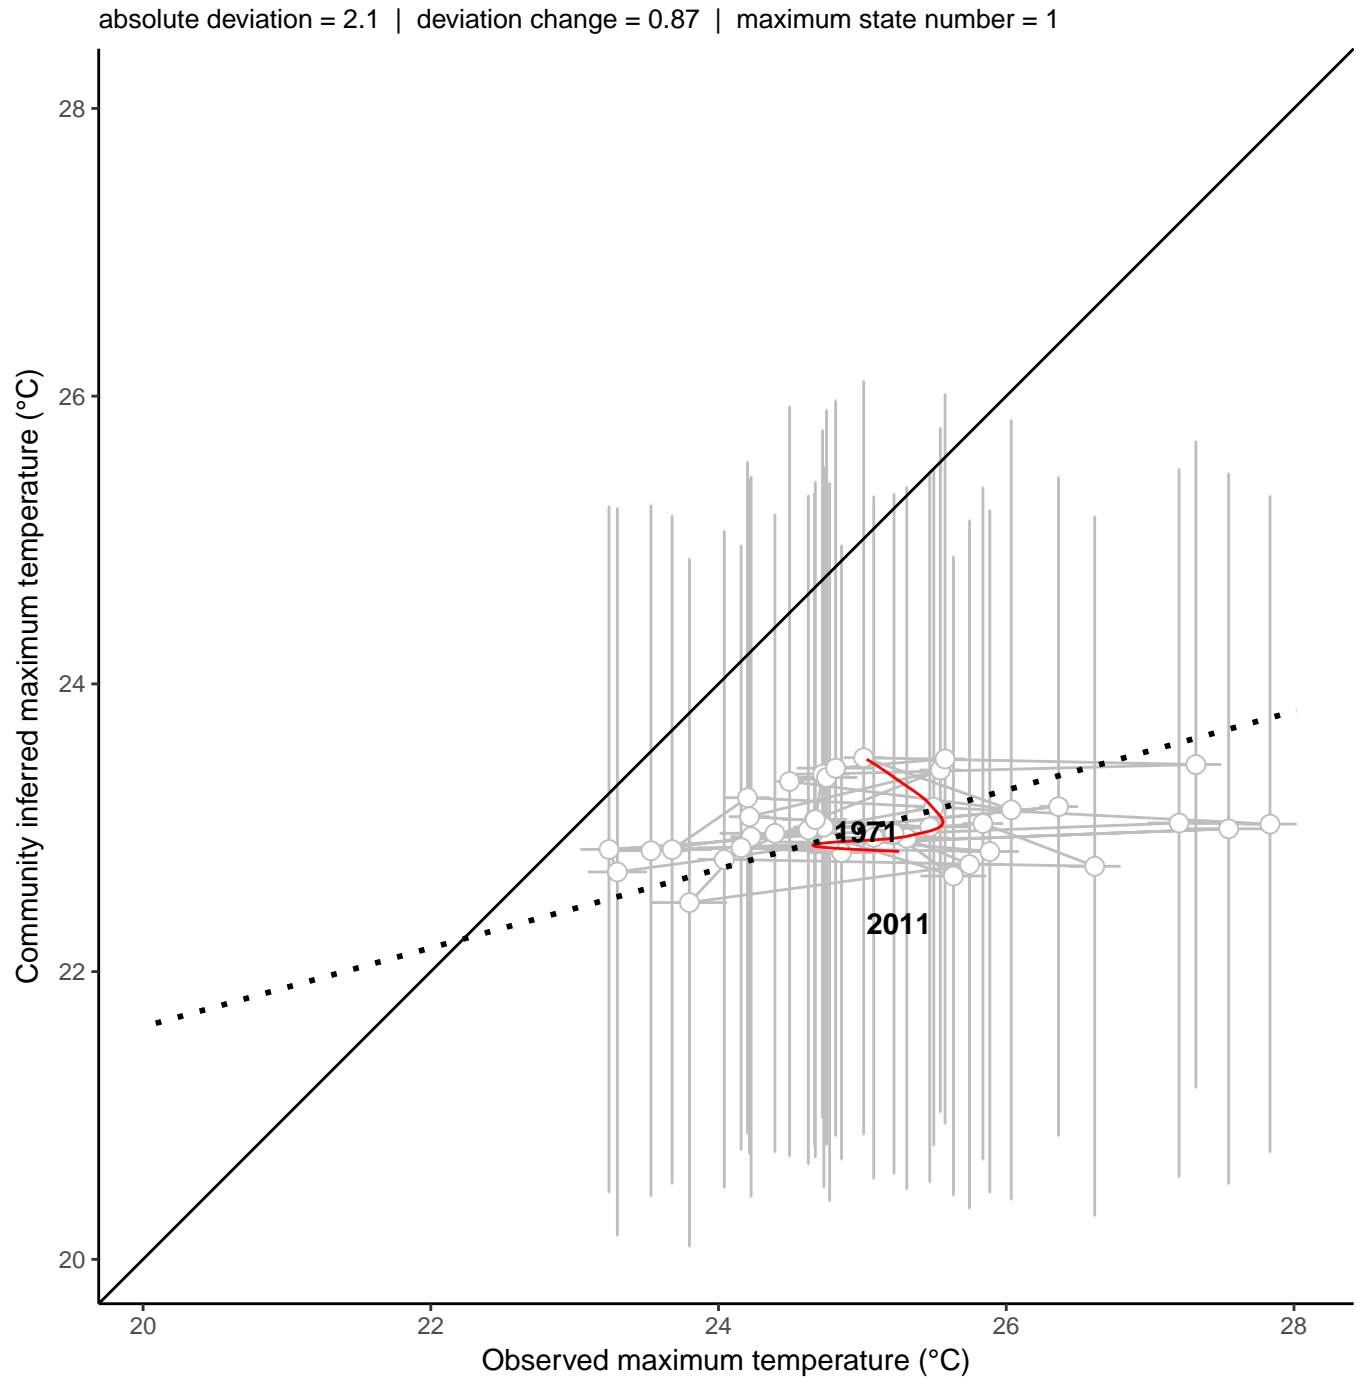

site : 840\_50\_15

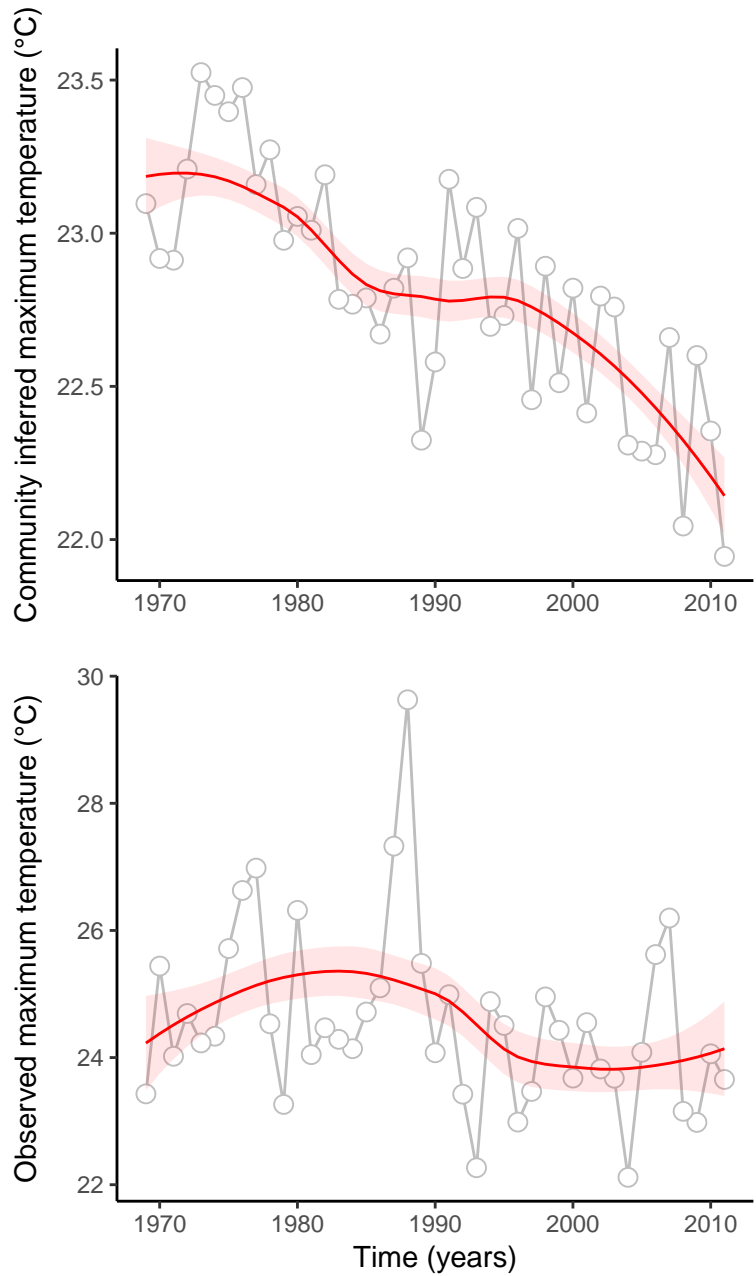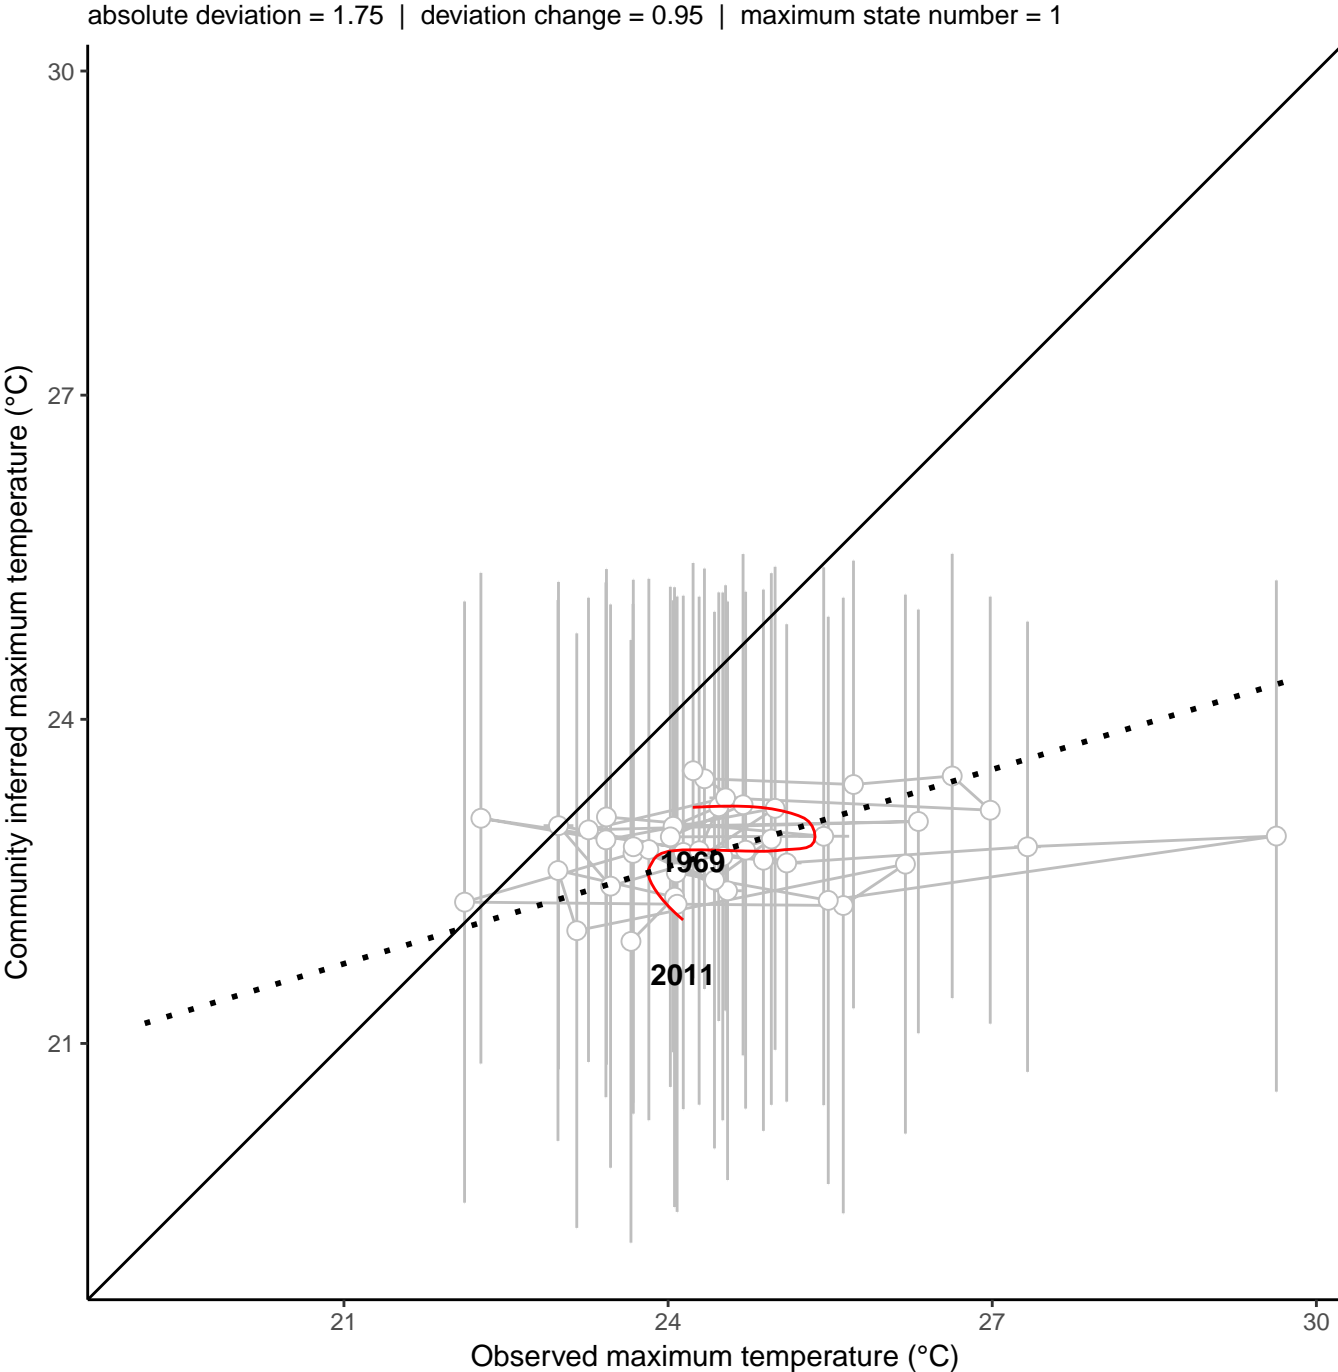

site : 840\_67\_19

absolute deviation = 4.31 | deviation change = 0.27 | maximum state number = 1

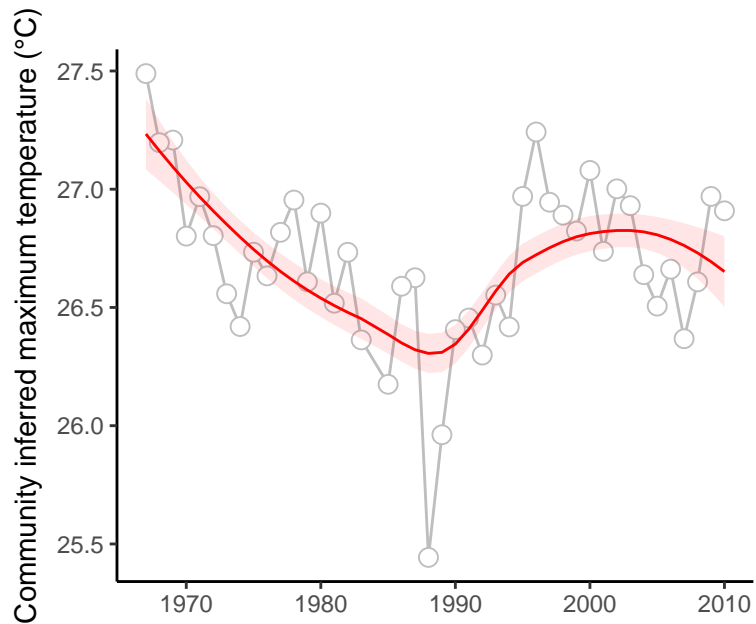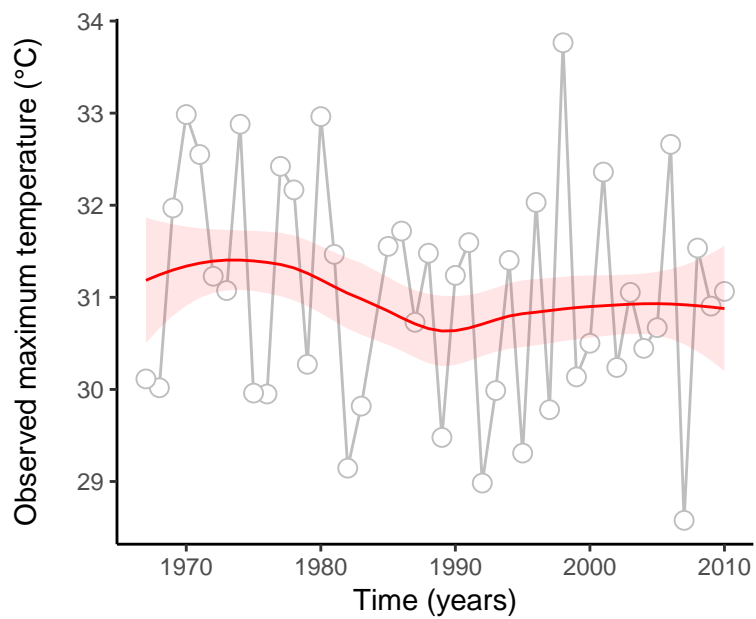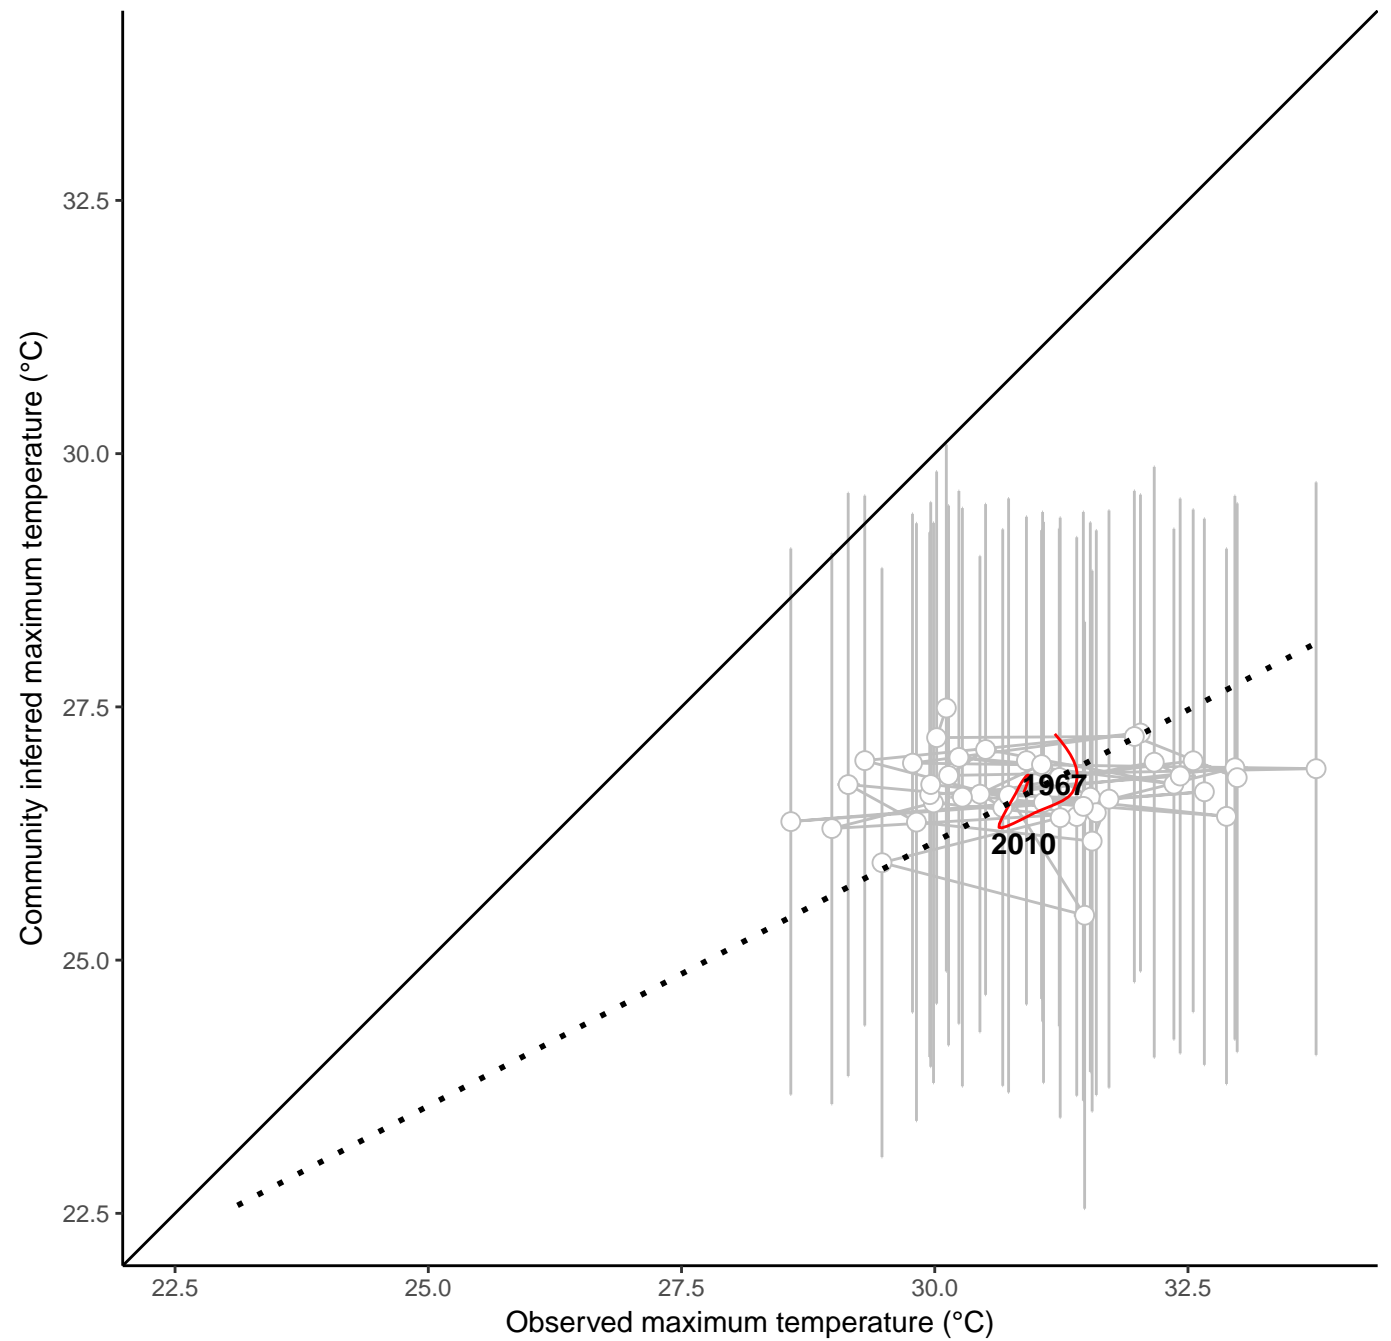

site : 840\_67\_7

absolute deviation = 4.3 | deviation change = 0.67 | maximum state number = 1

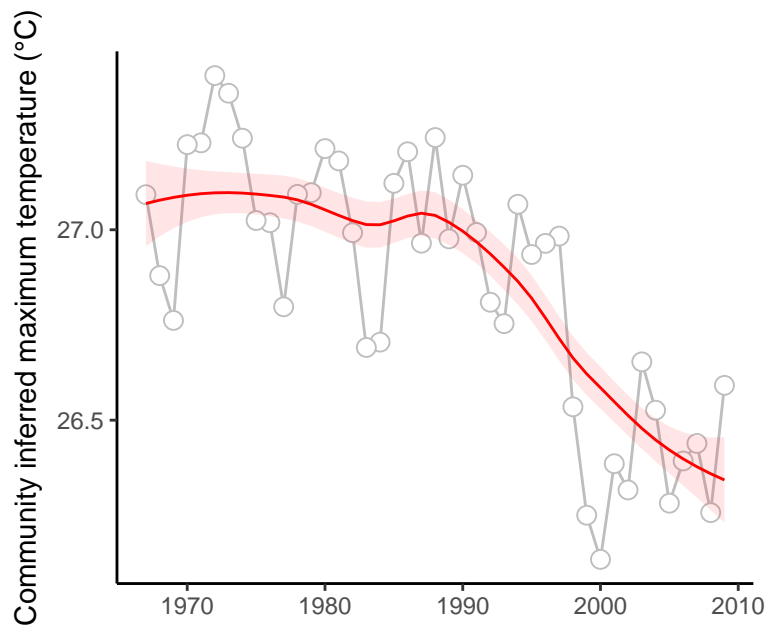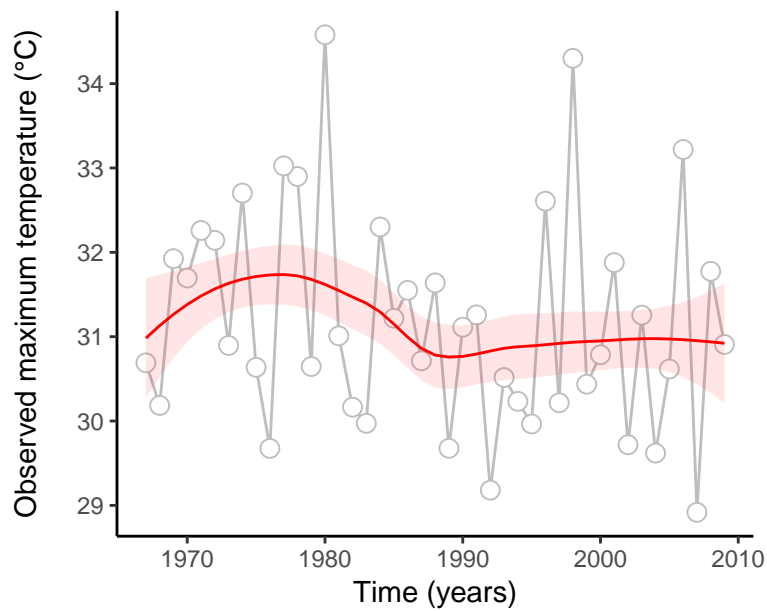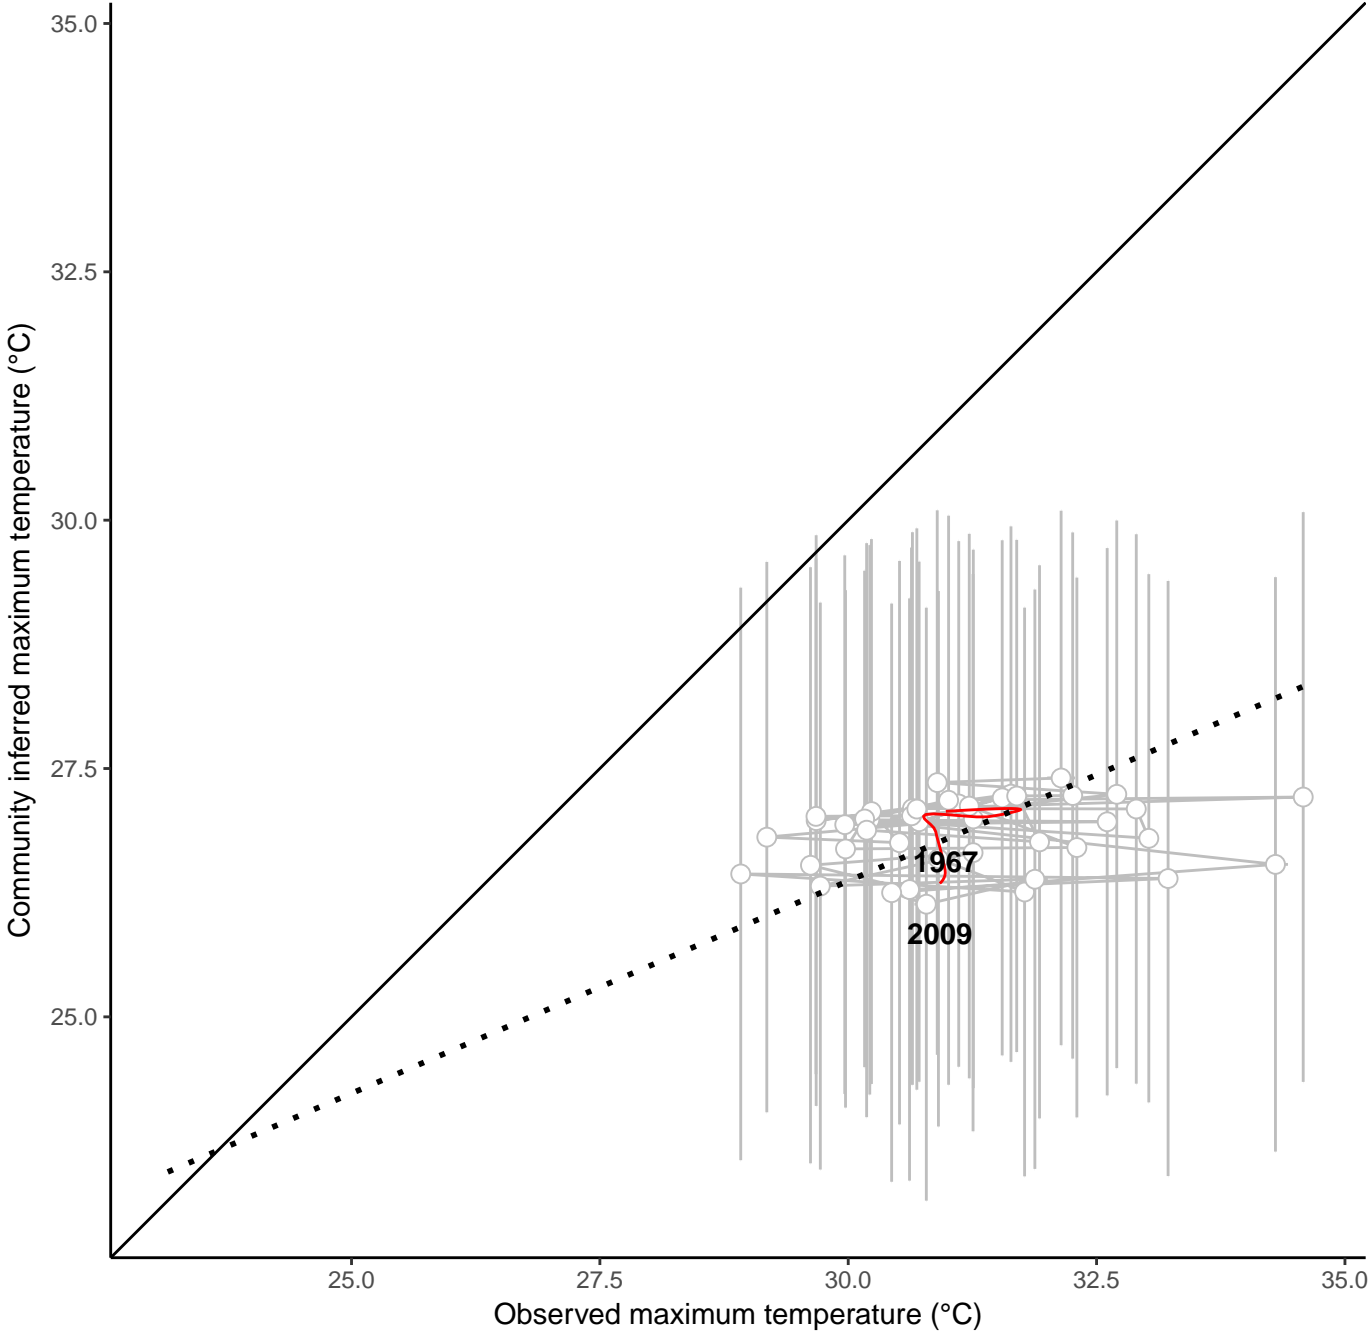

site : 840\_69\_10

absolute deviation = 0.88 | deviation change = -1.62 | maximum state number = 1

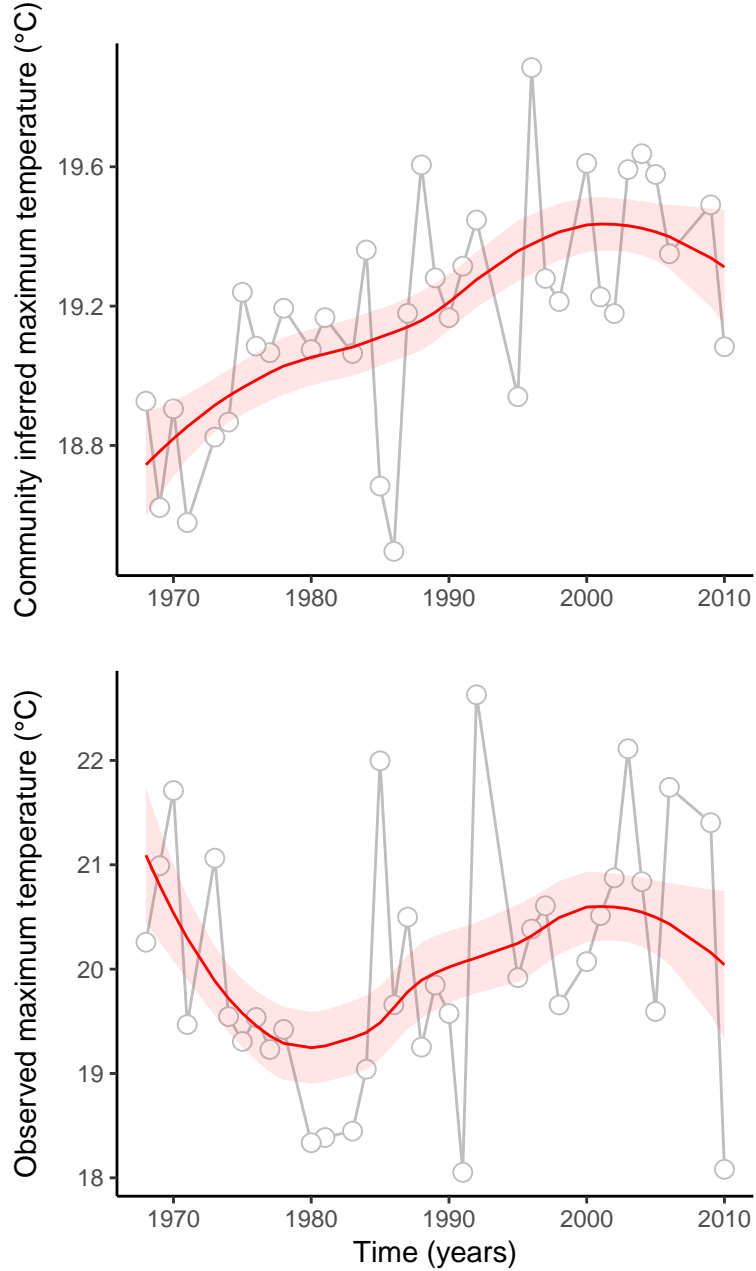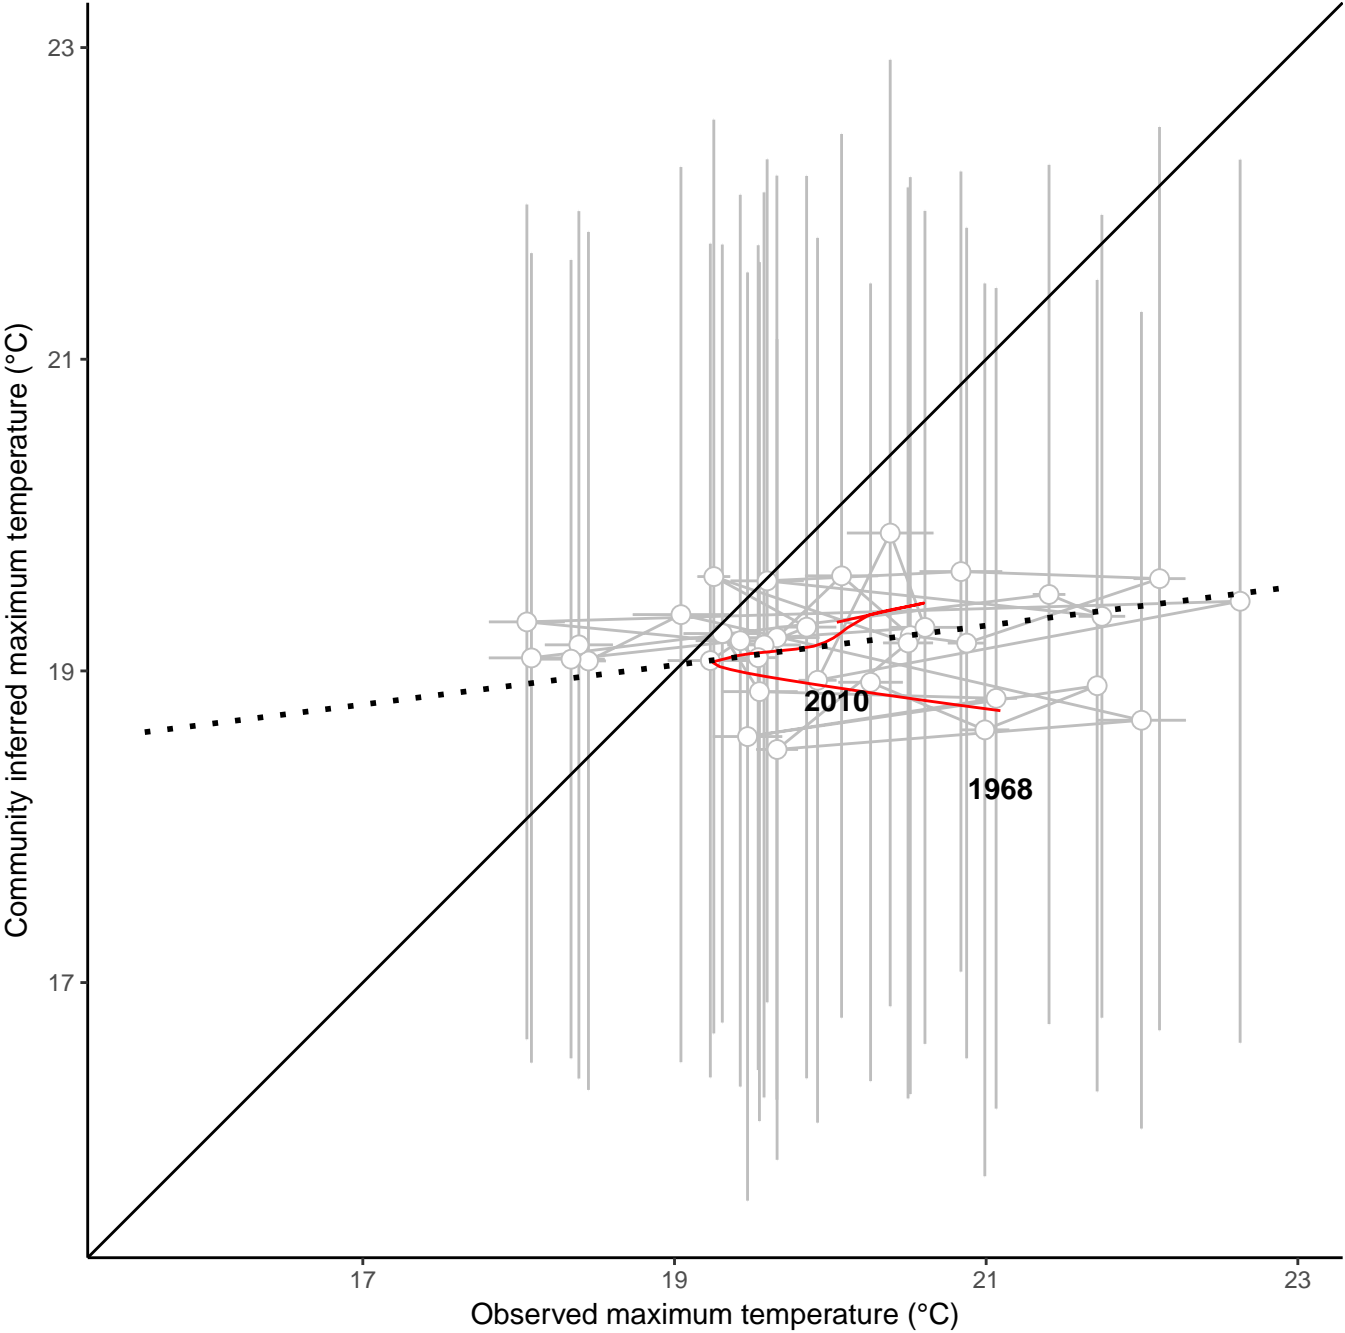



site : 840\_82\_26

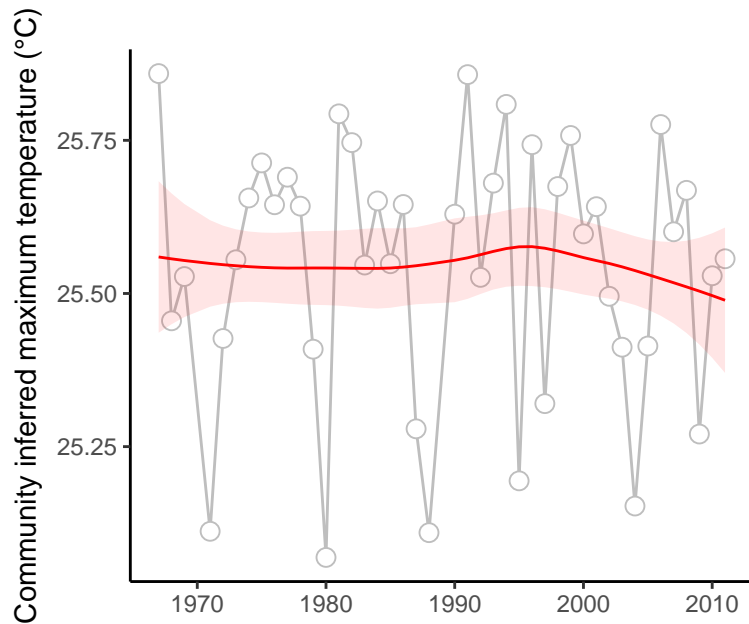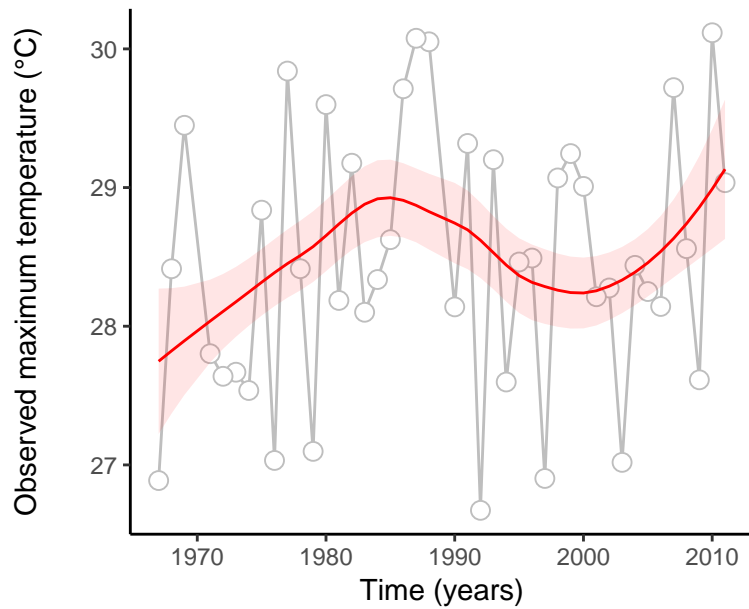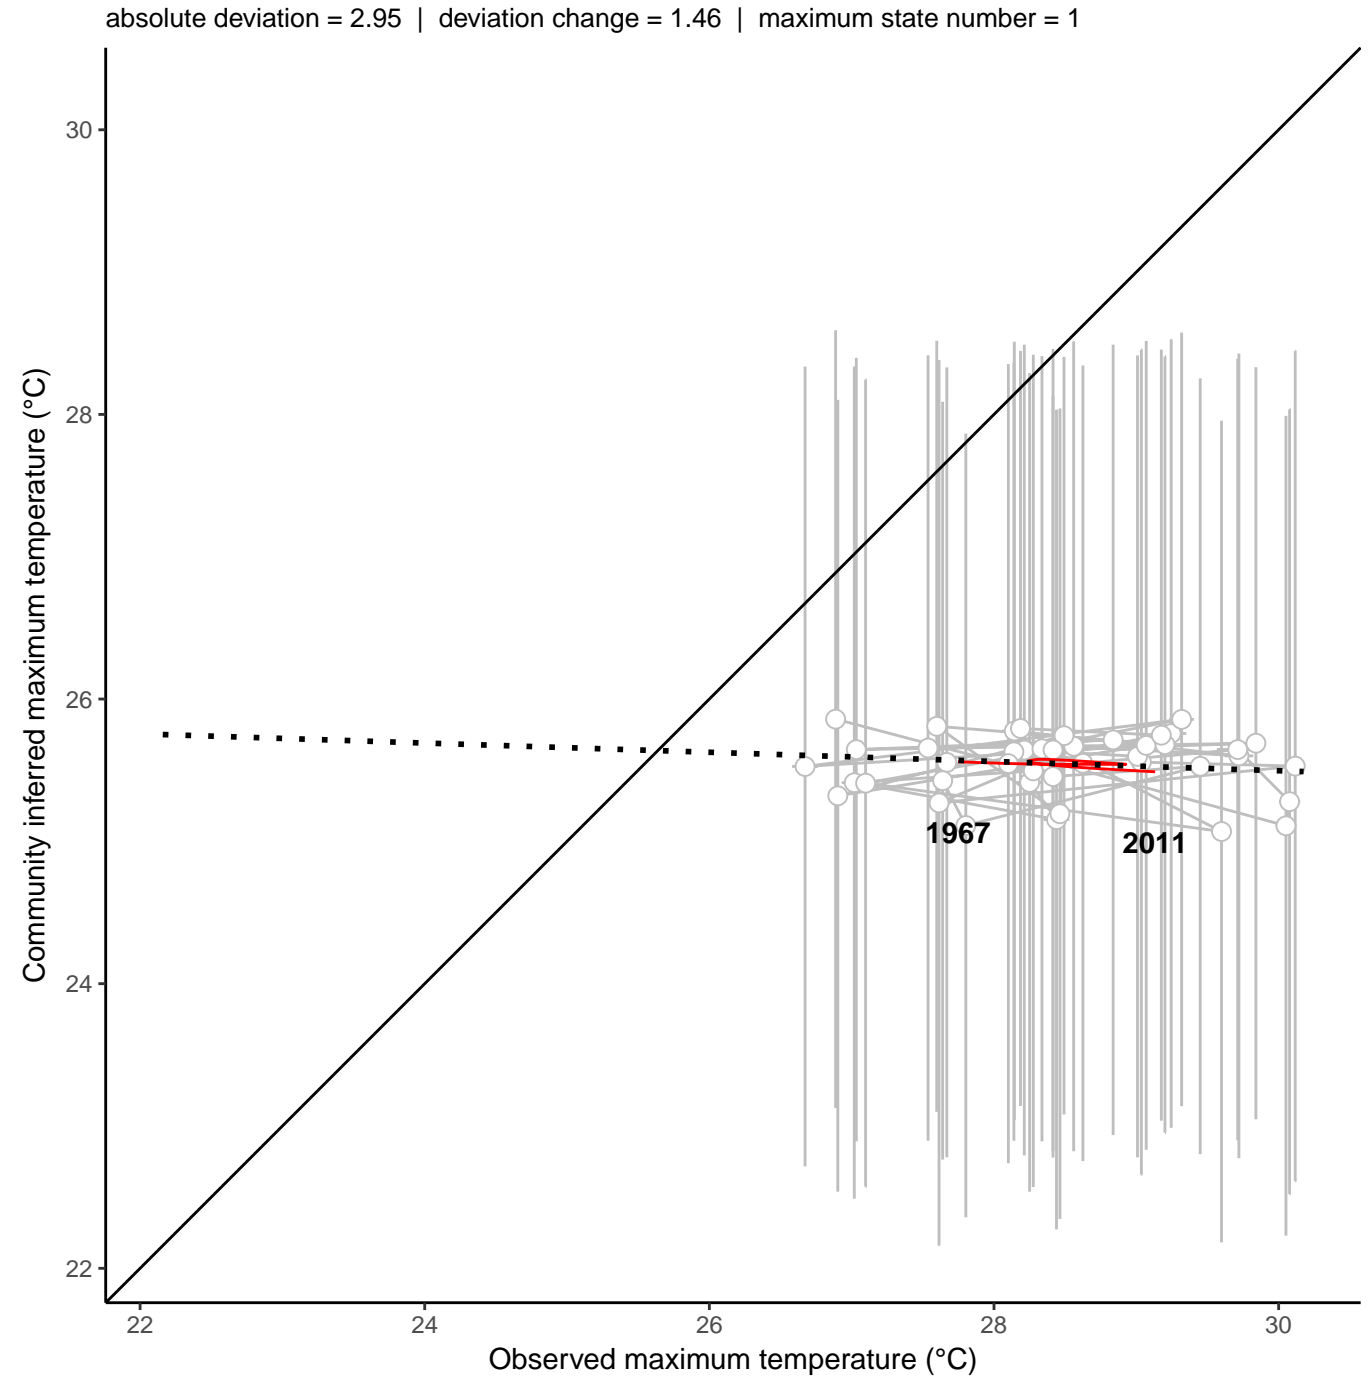

site : 840\_83\_44

absolute deviation = 4.75 | deviation change = 1.61 | maximum state number = 1

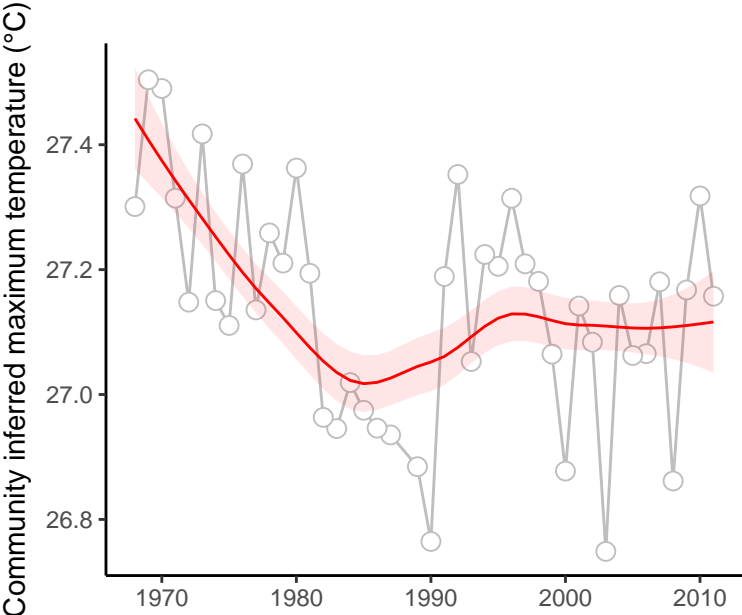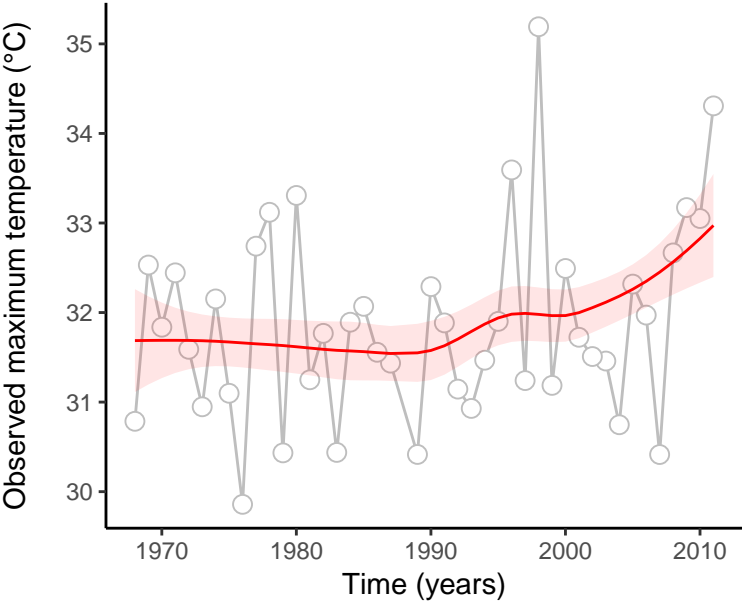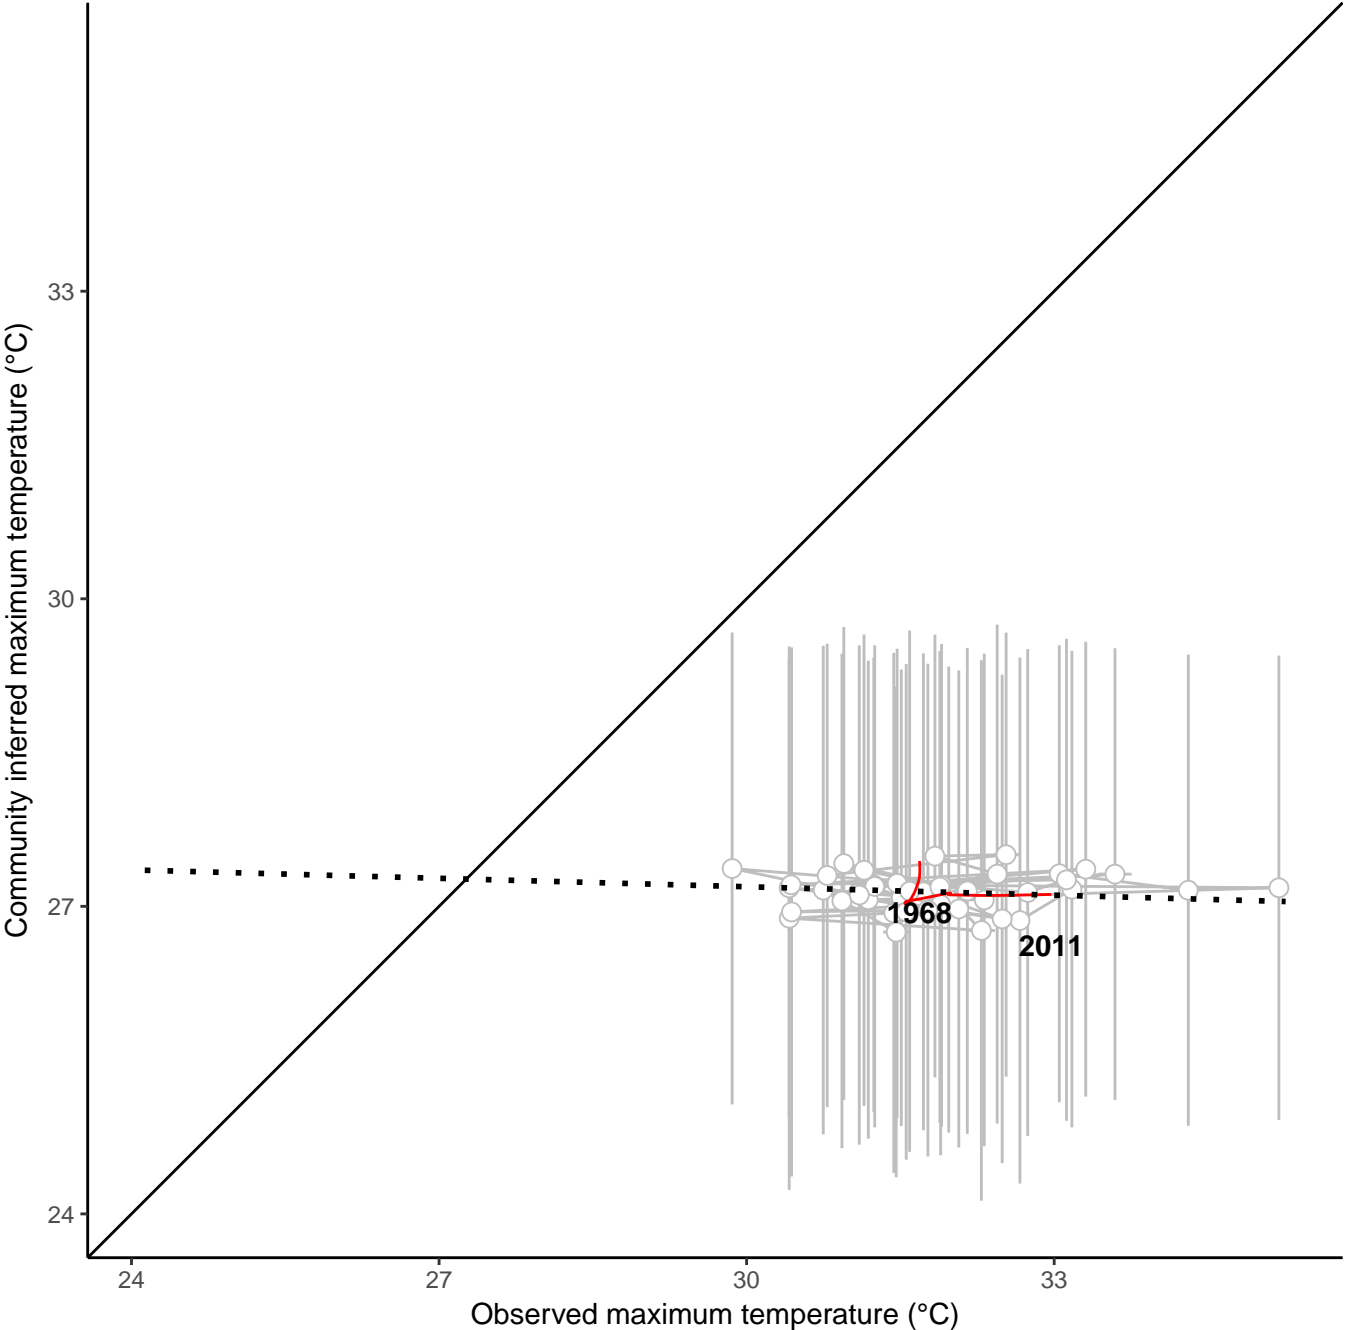

site : 840\_91\_34

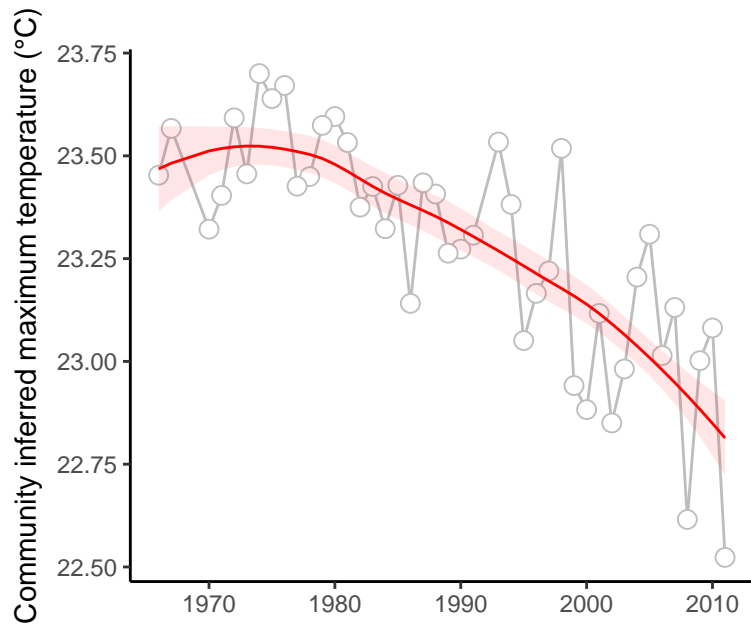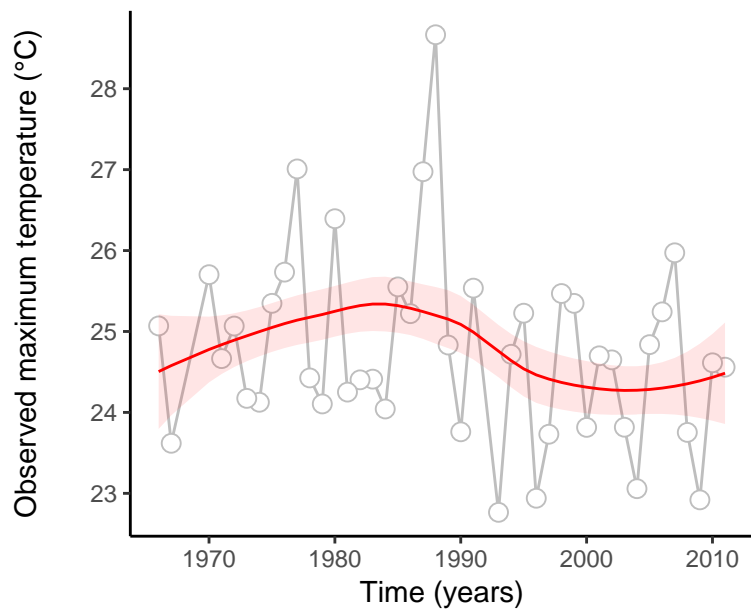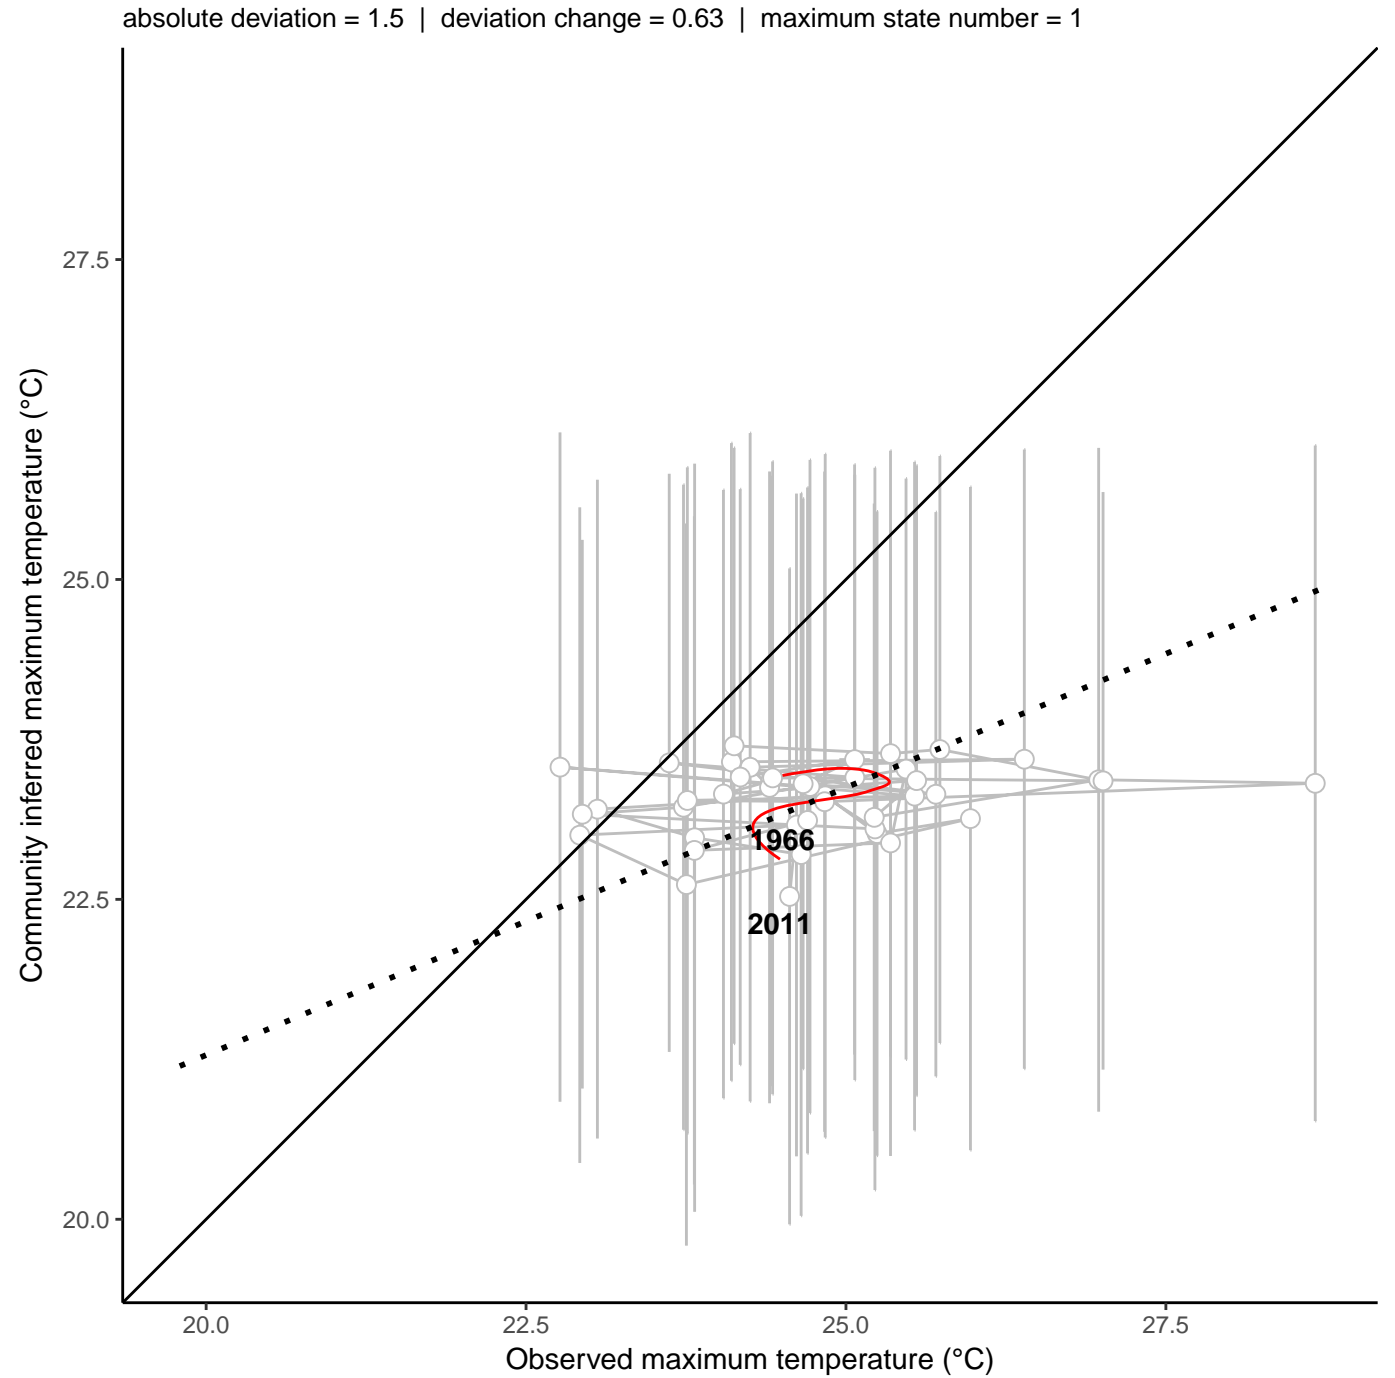

site : 840\_91\_51

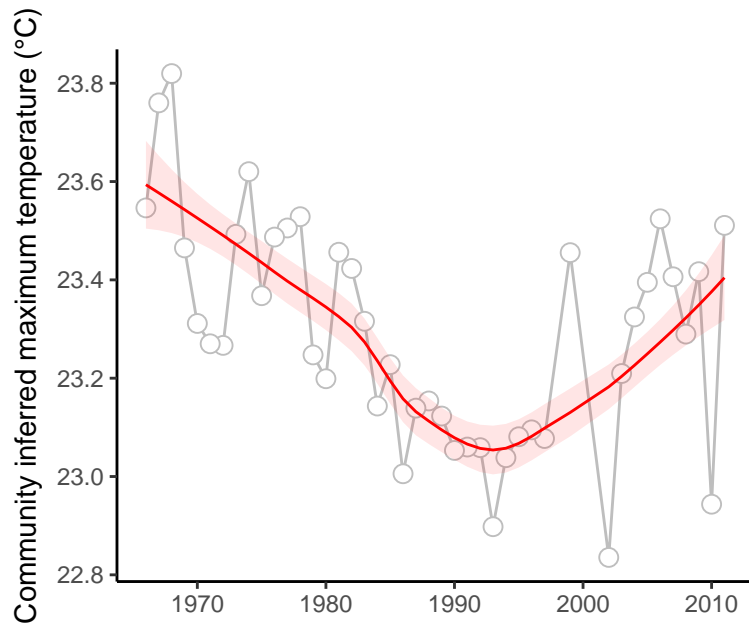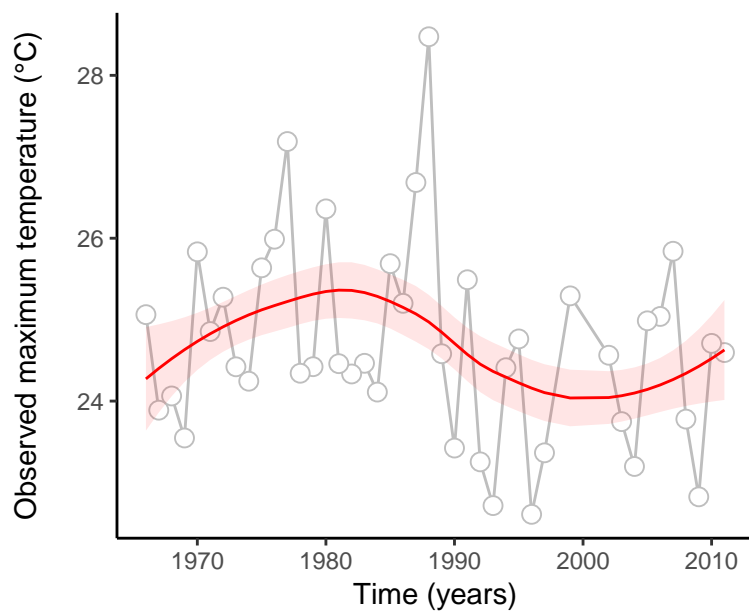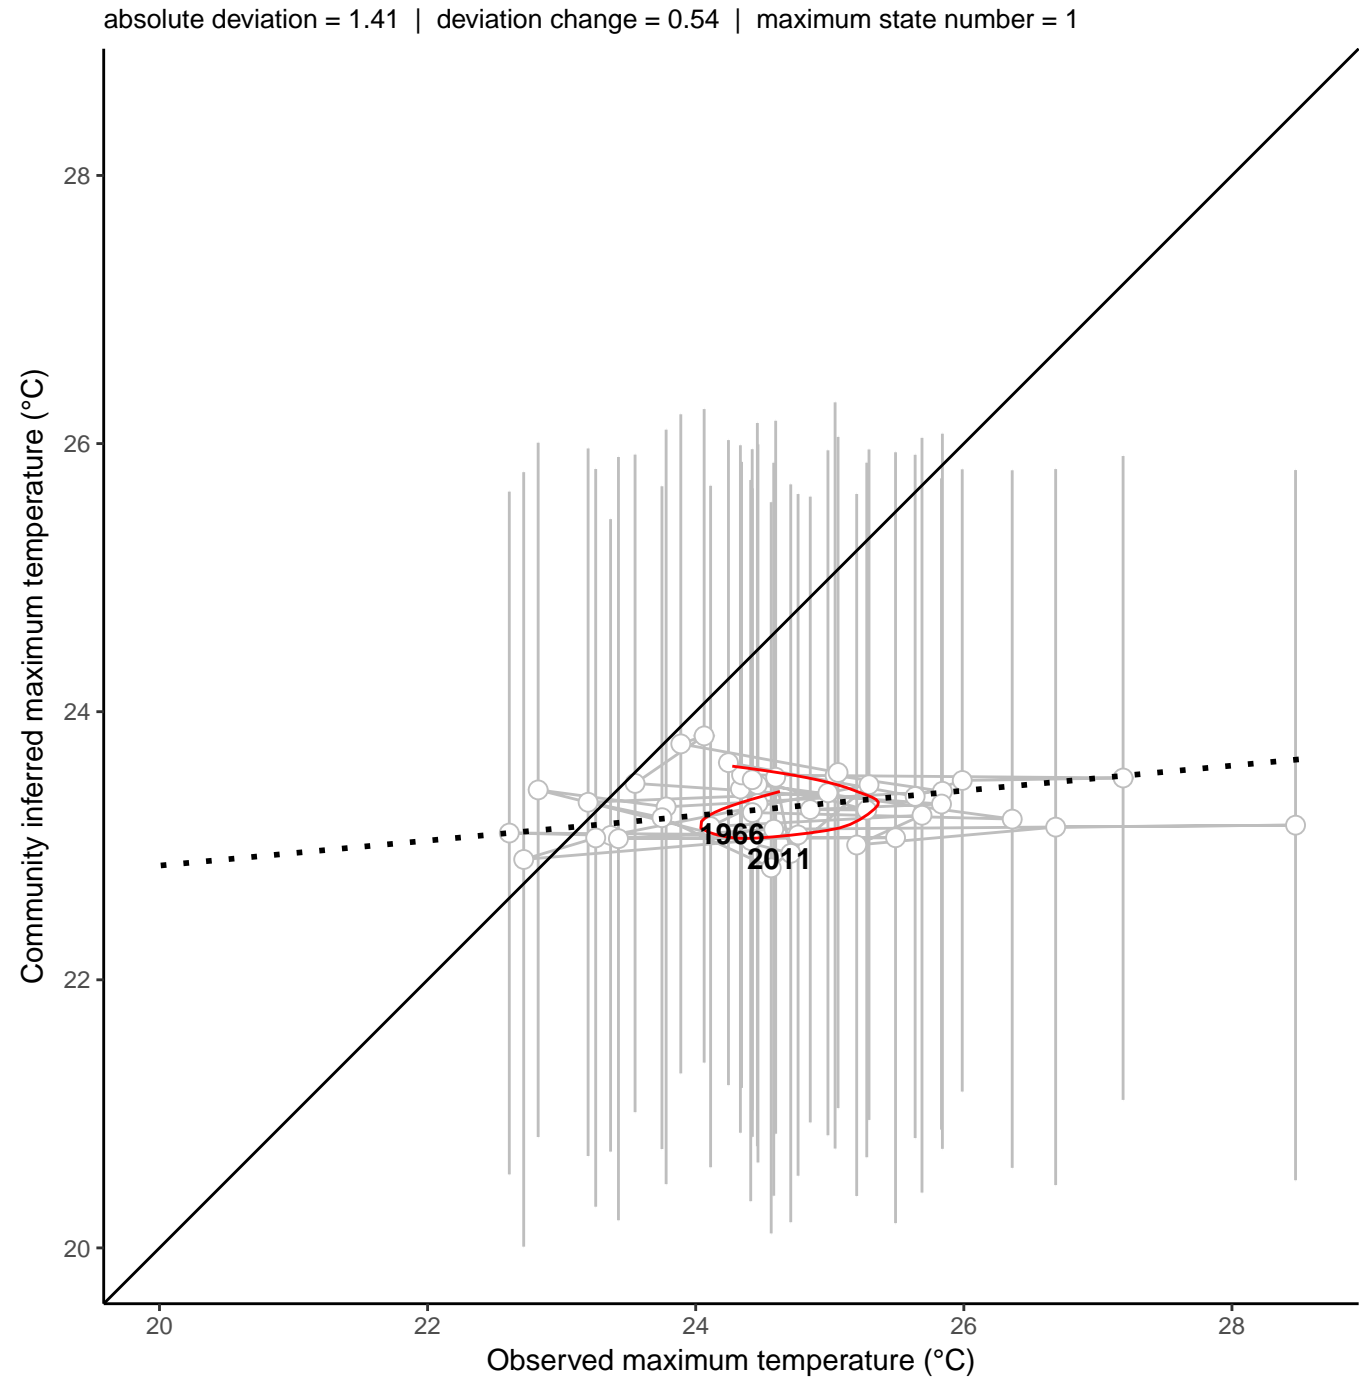

site : 840\_27\_16

absolute deviation = 4.49 | deviation change = 0.71 | maximum state number = 1

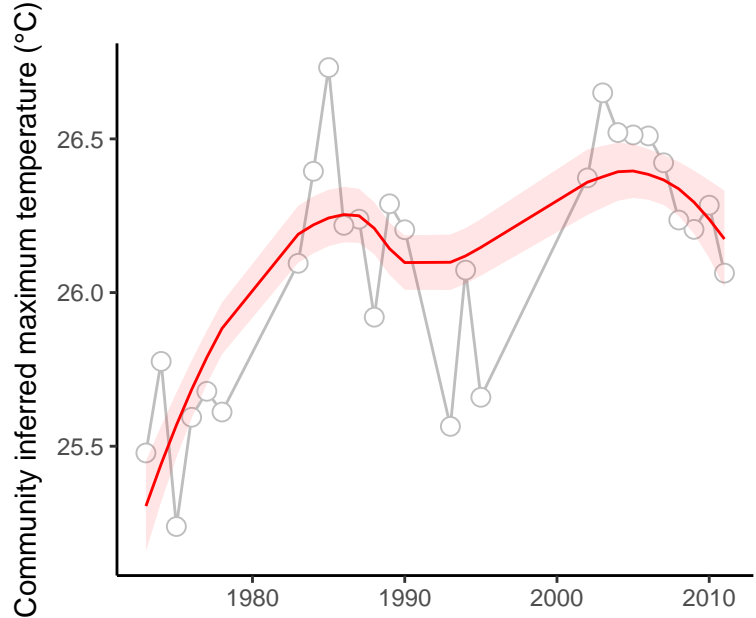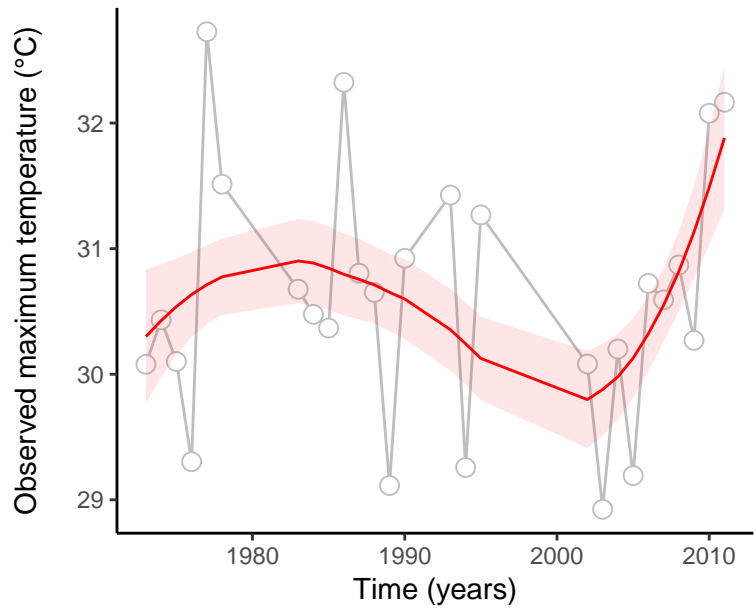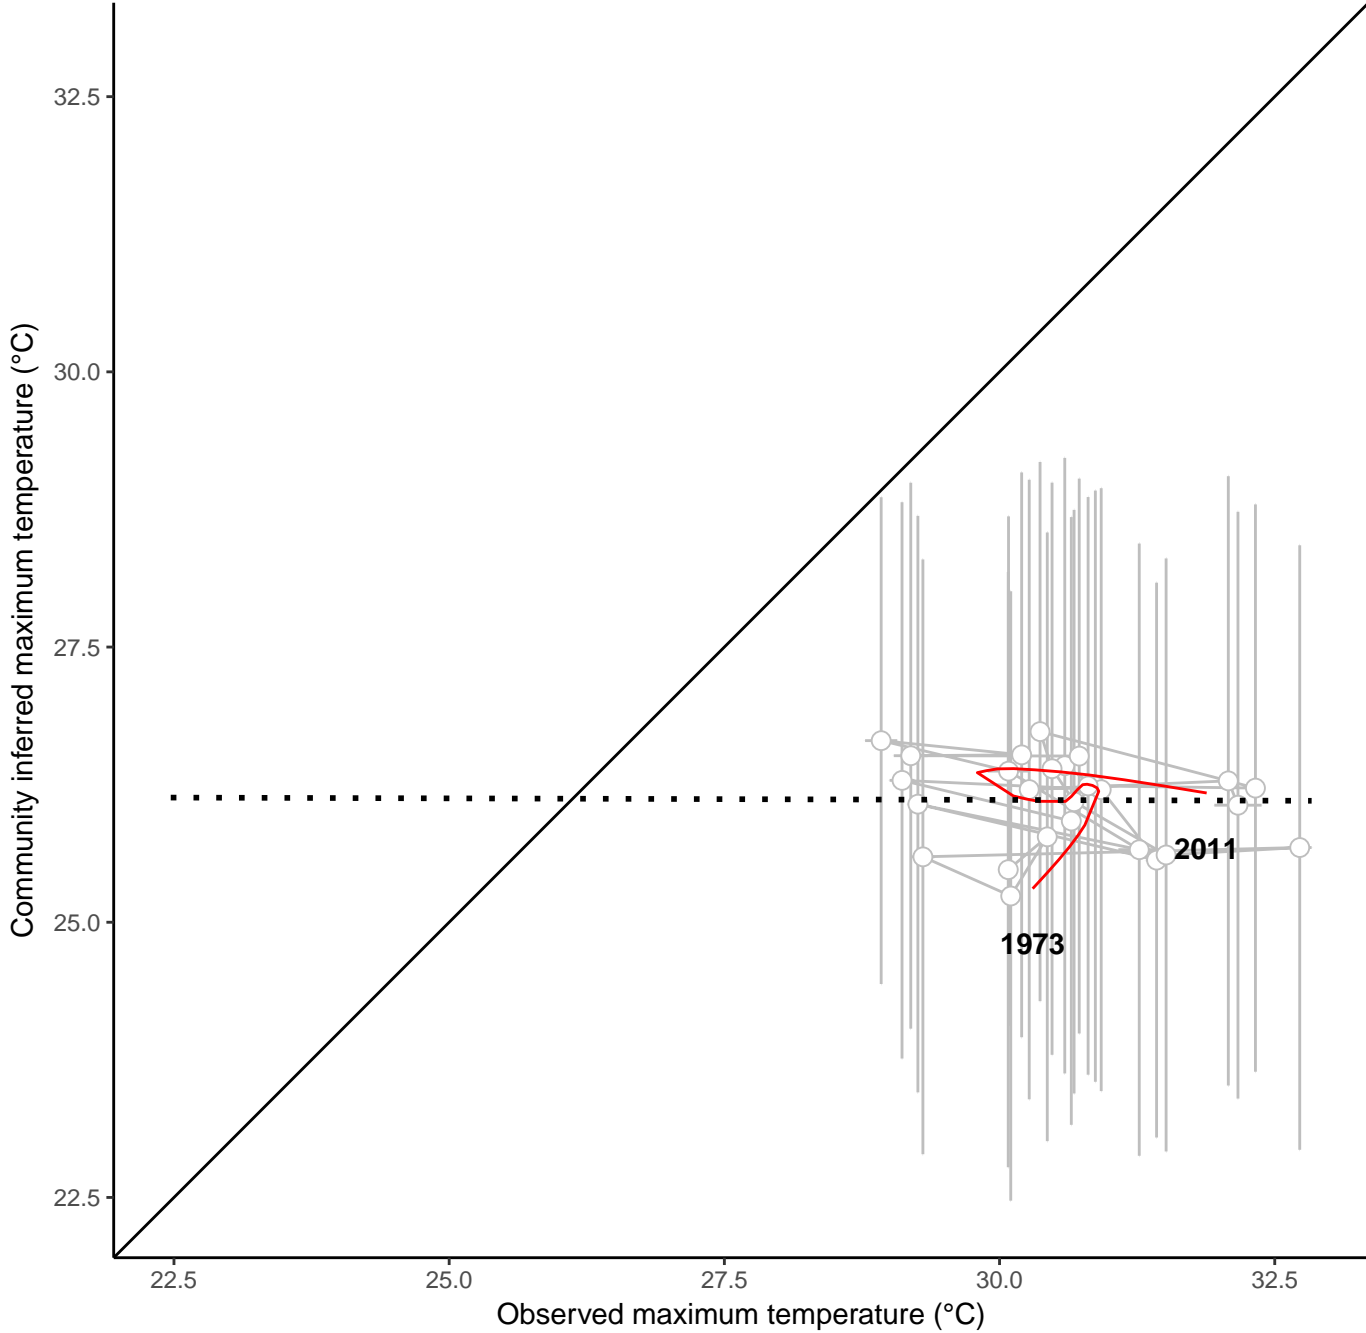

site : 840\_33\_1

absolute deviation = 1.95 | deviation change = 1.22 | maximum state number = 2

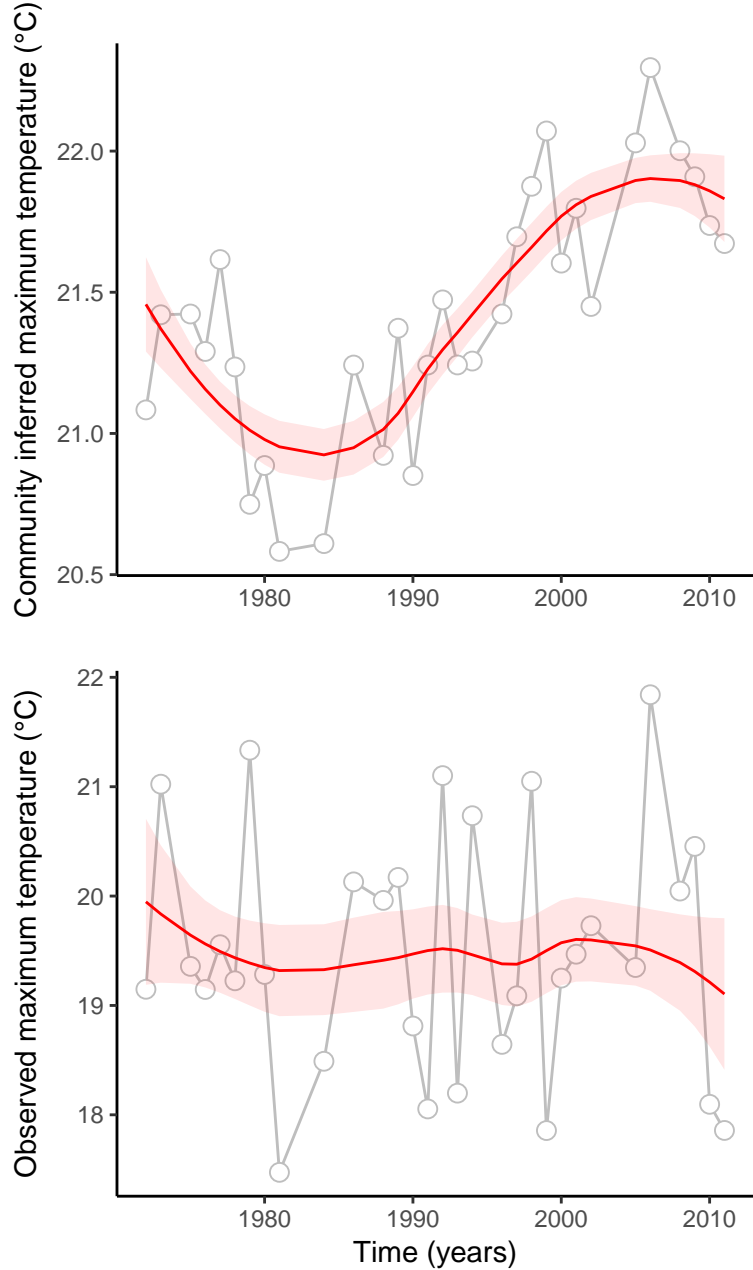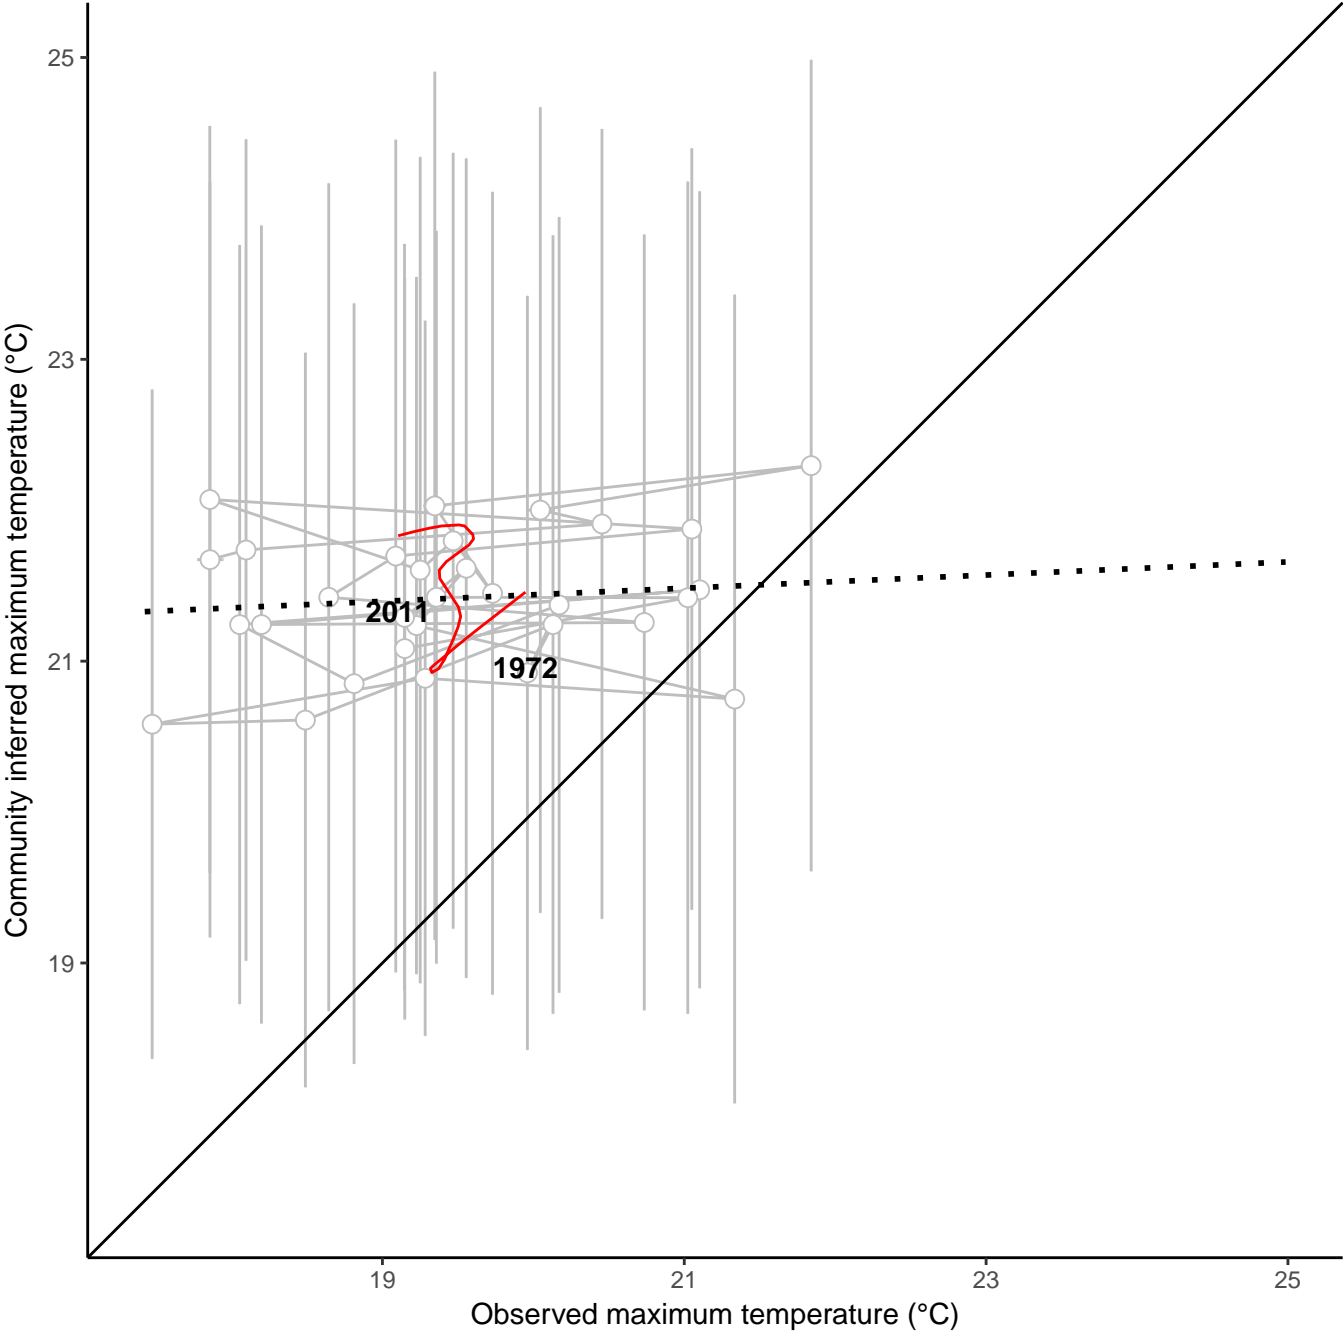

site : 840\_34\_8

absolute deviation = 2.86 | deviation change = 1.28 | maximum state number = 1

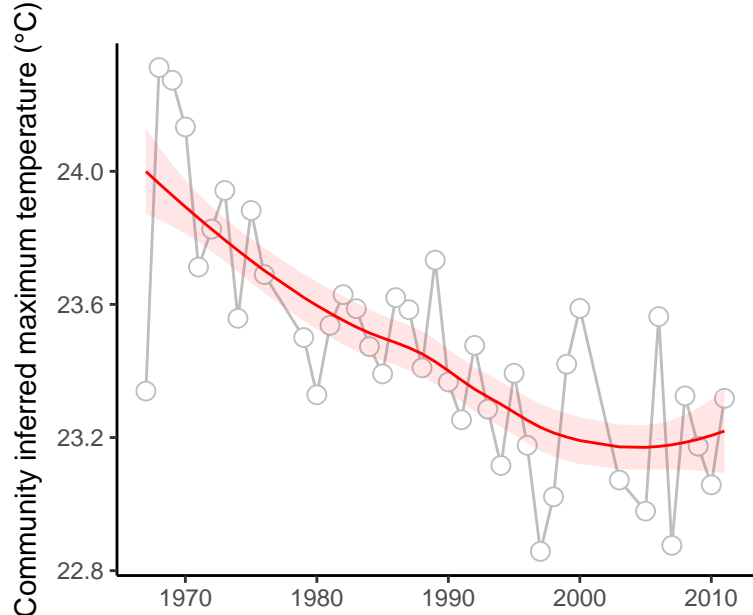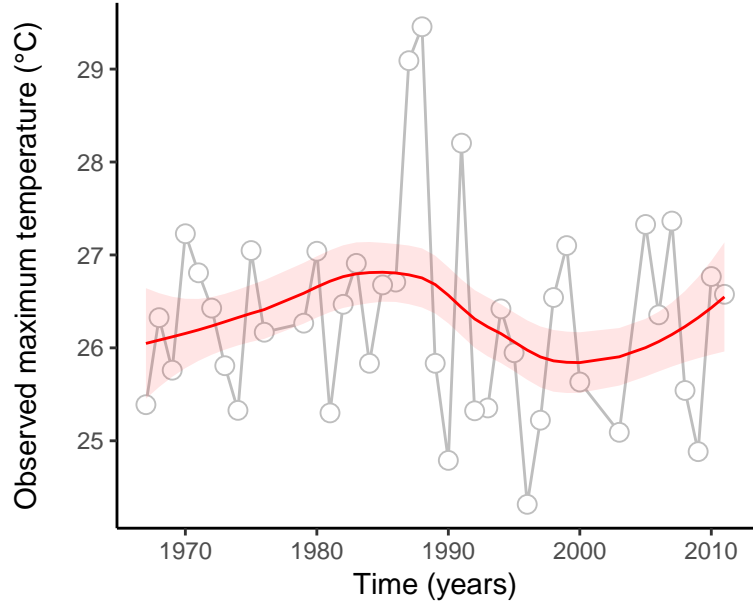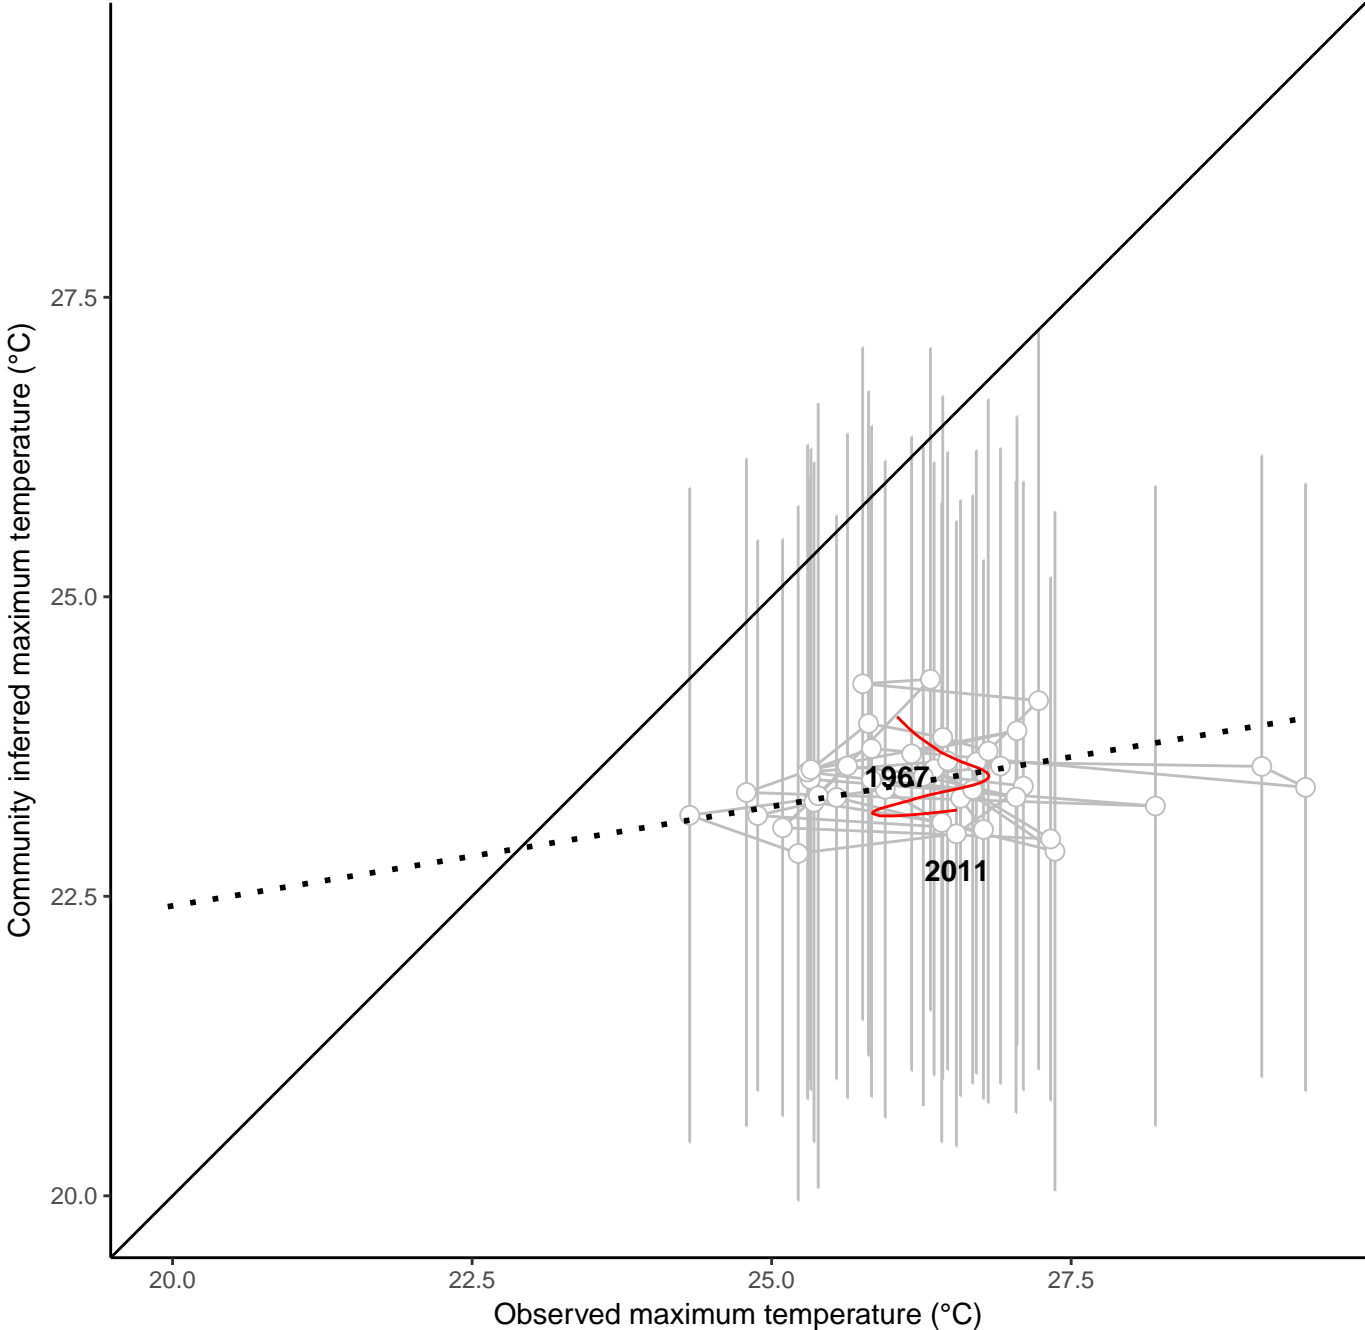

site : 840\_49\_36

absolute deviation = 1.84 | deviation change = 0.57 | maximum state number = 1

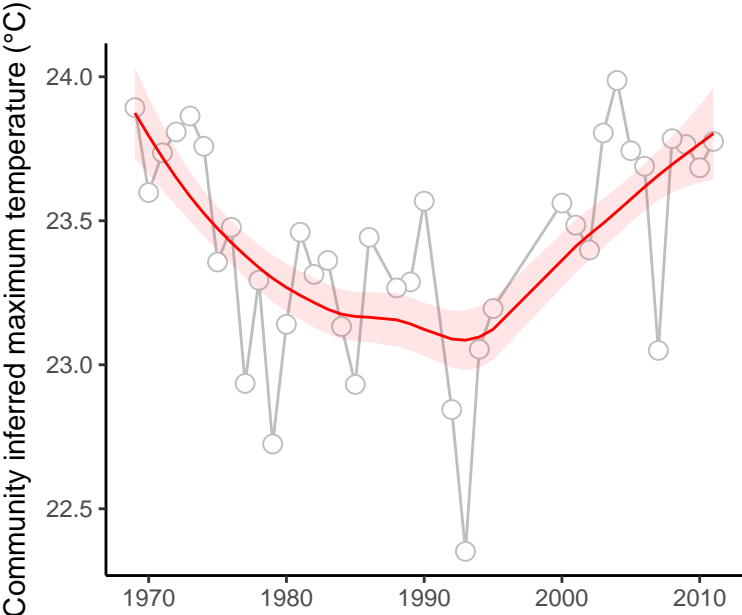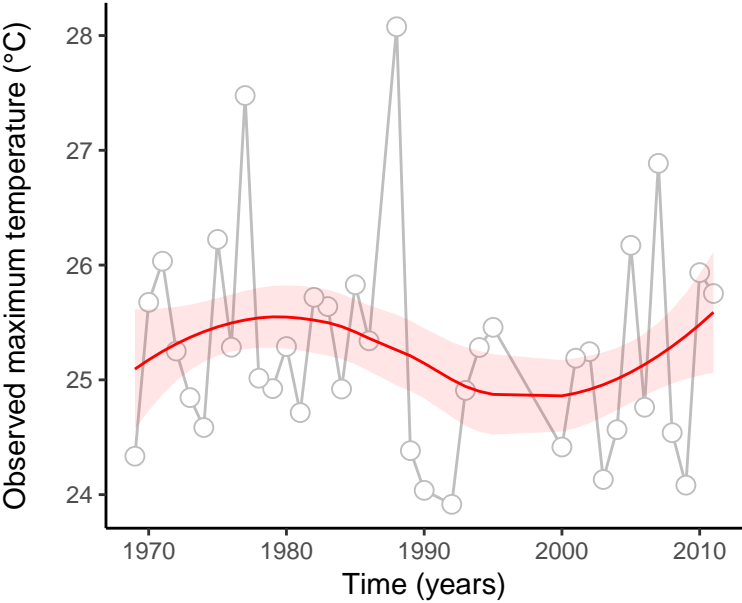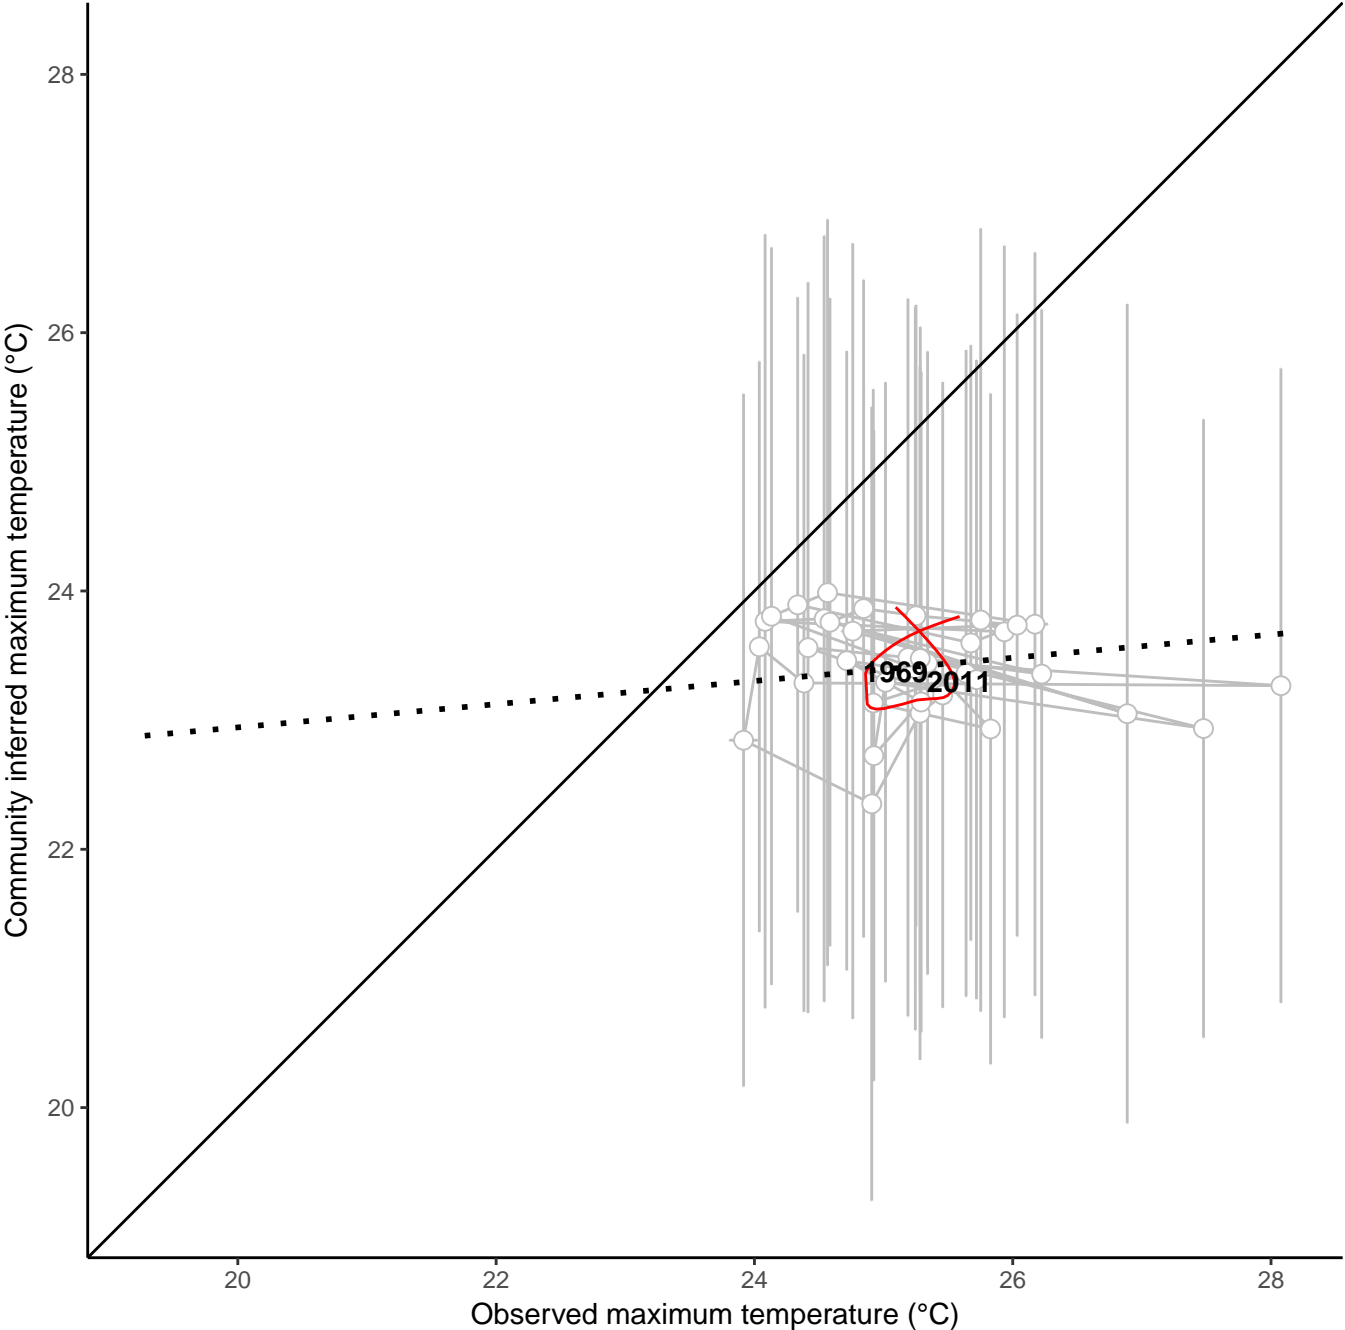



site : 840\_53\_15

absolute deviation = 0.96 | deviation change = -0.76 | maximum state number = 1

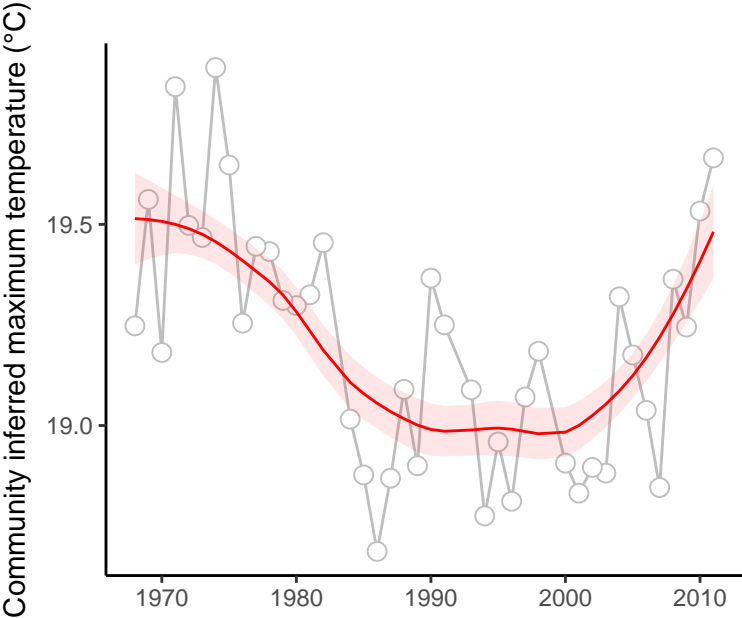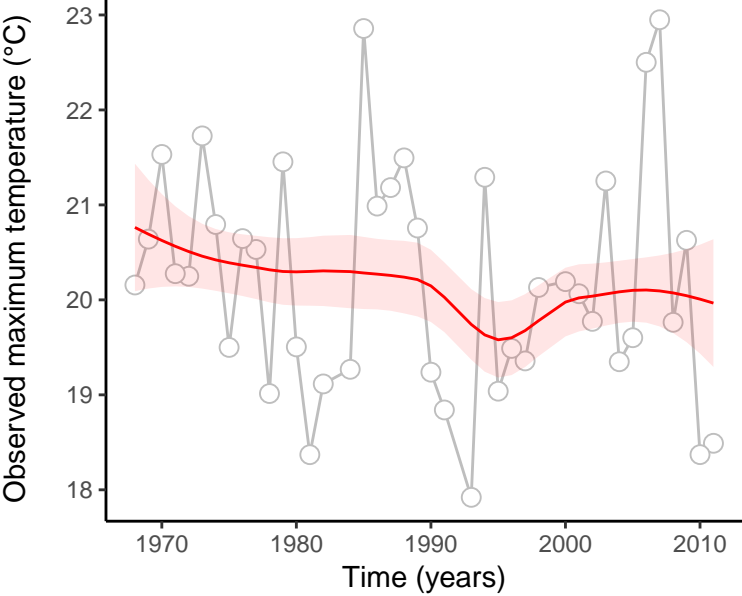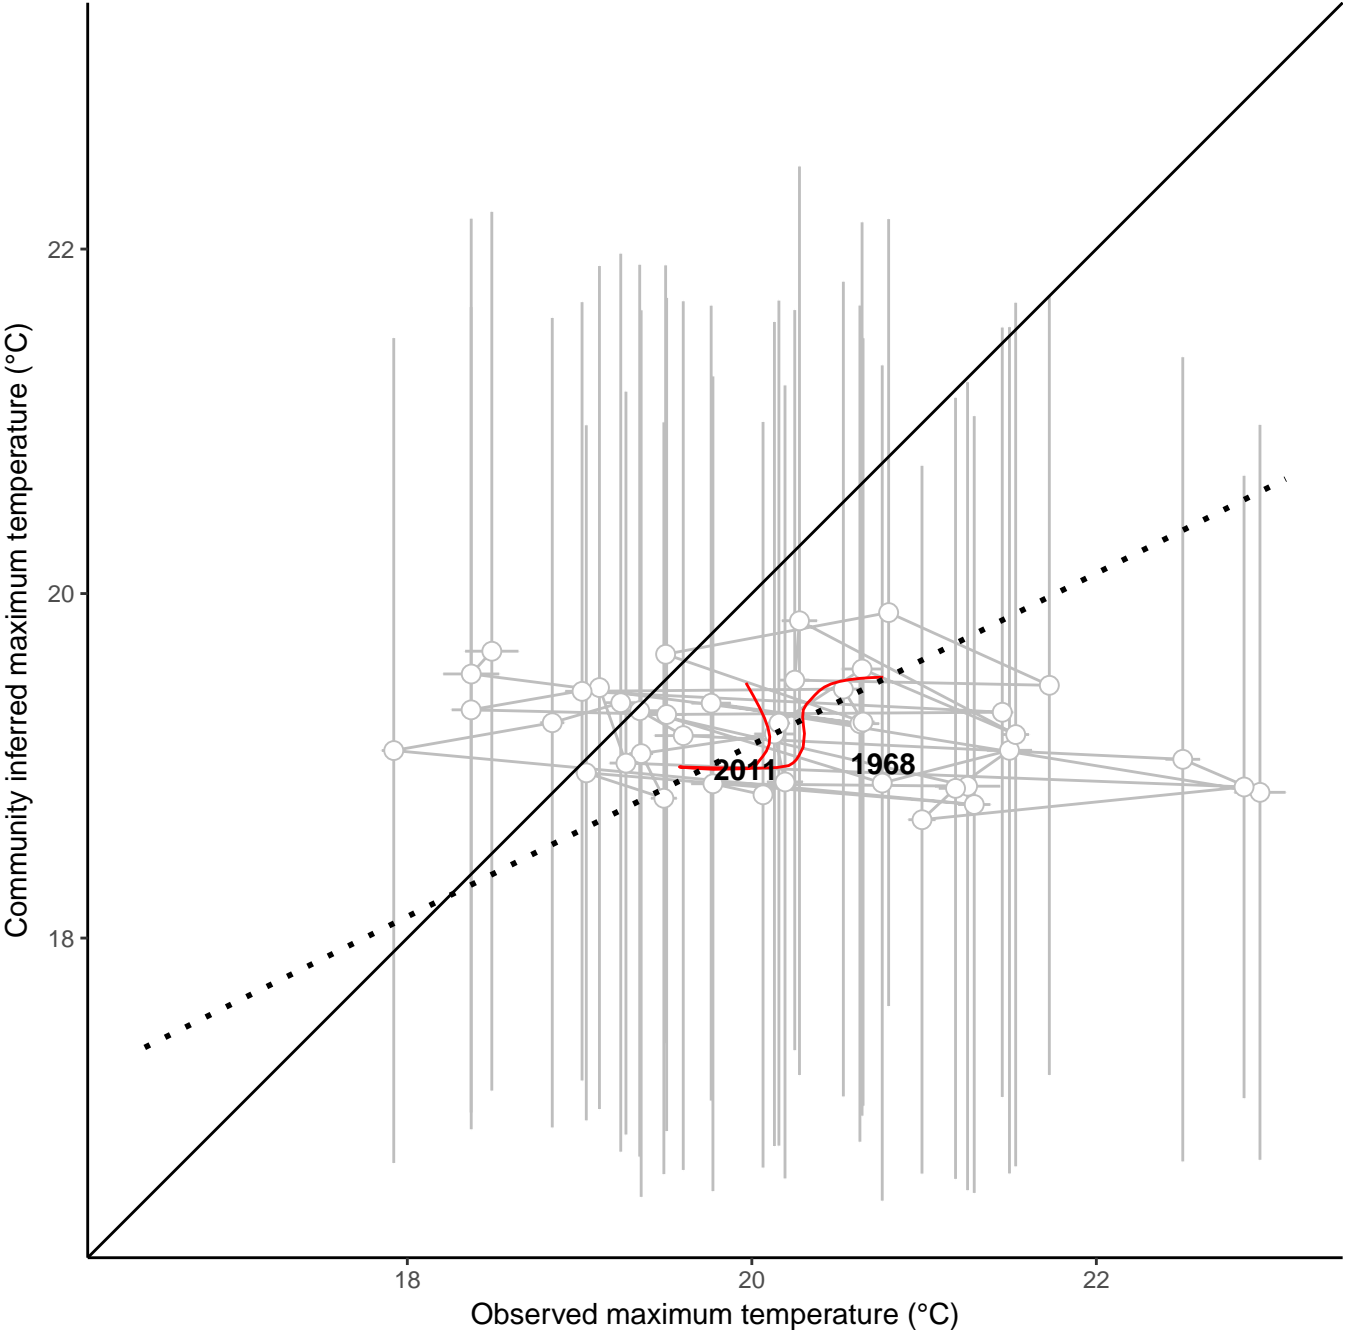

site : 840\_61\_30

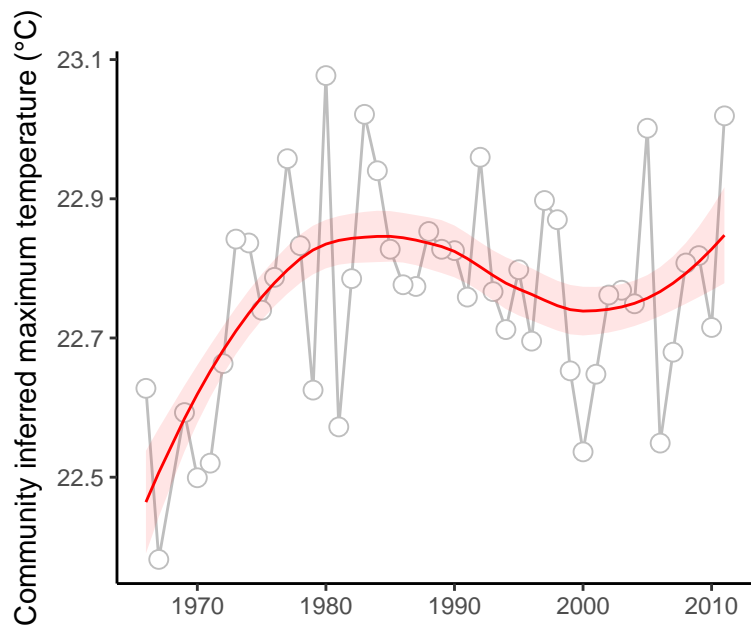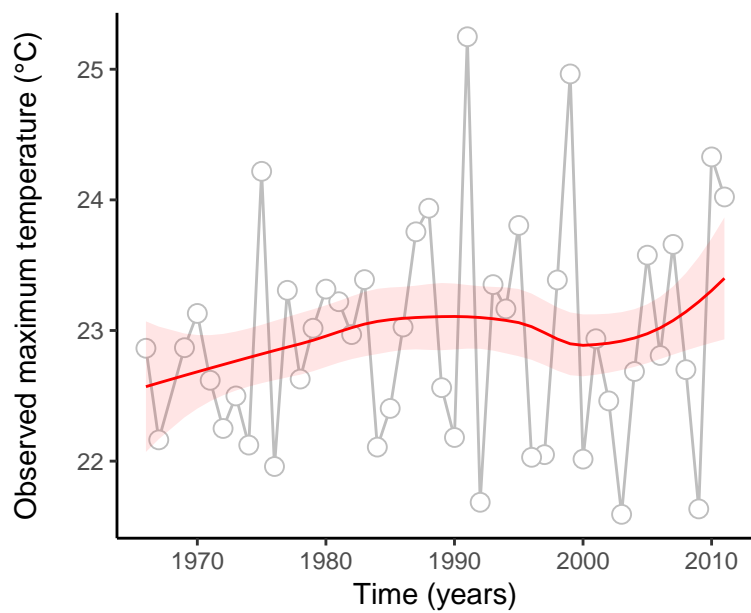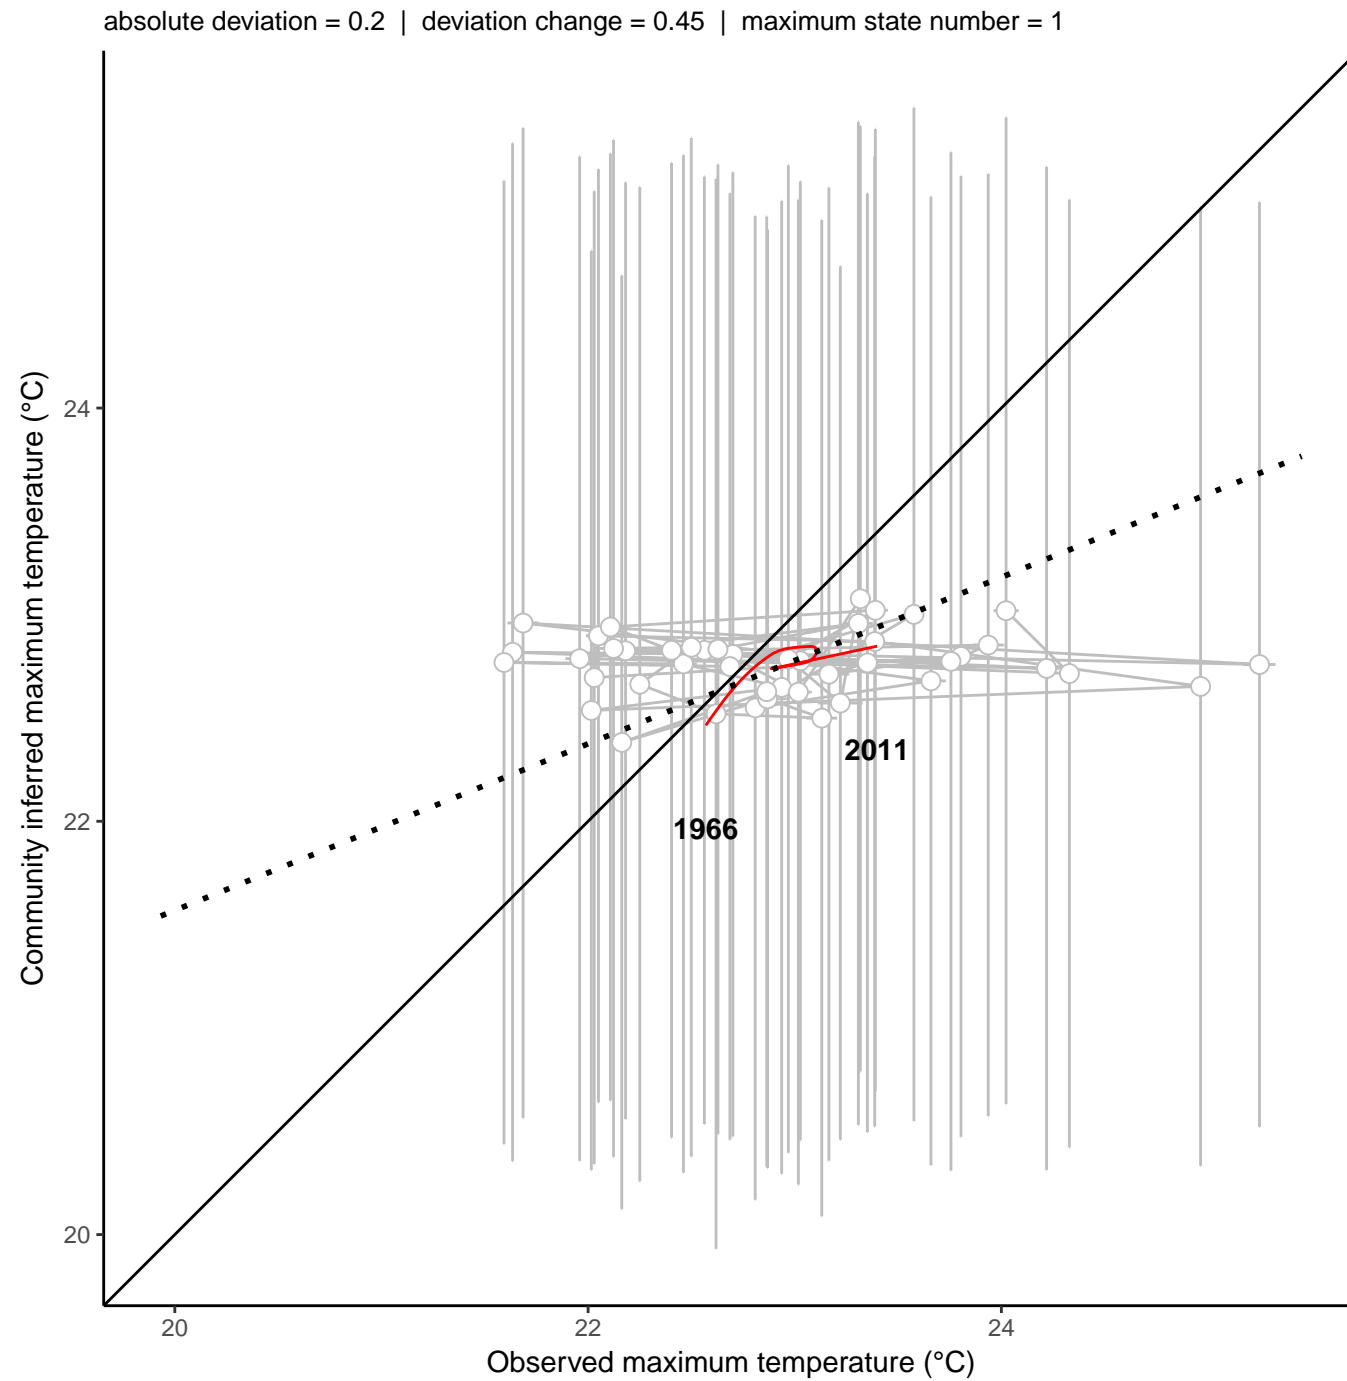

site : 840\_61\_59

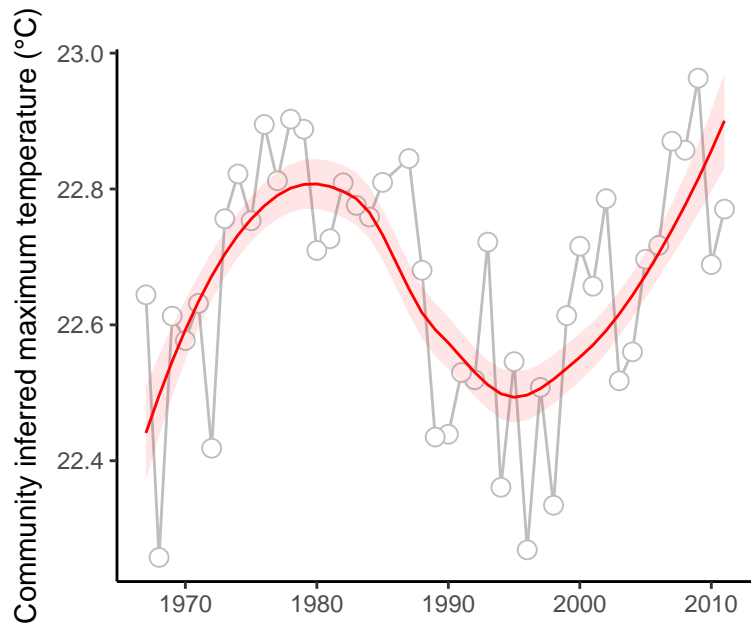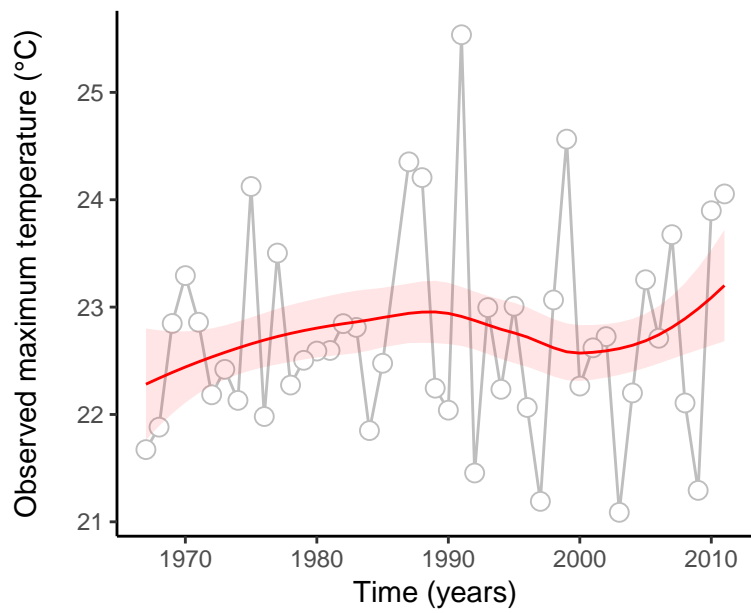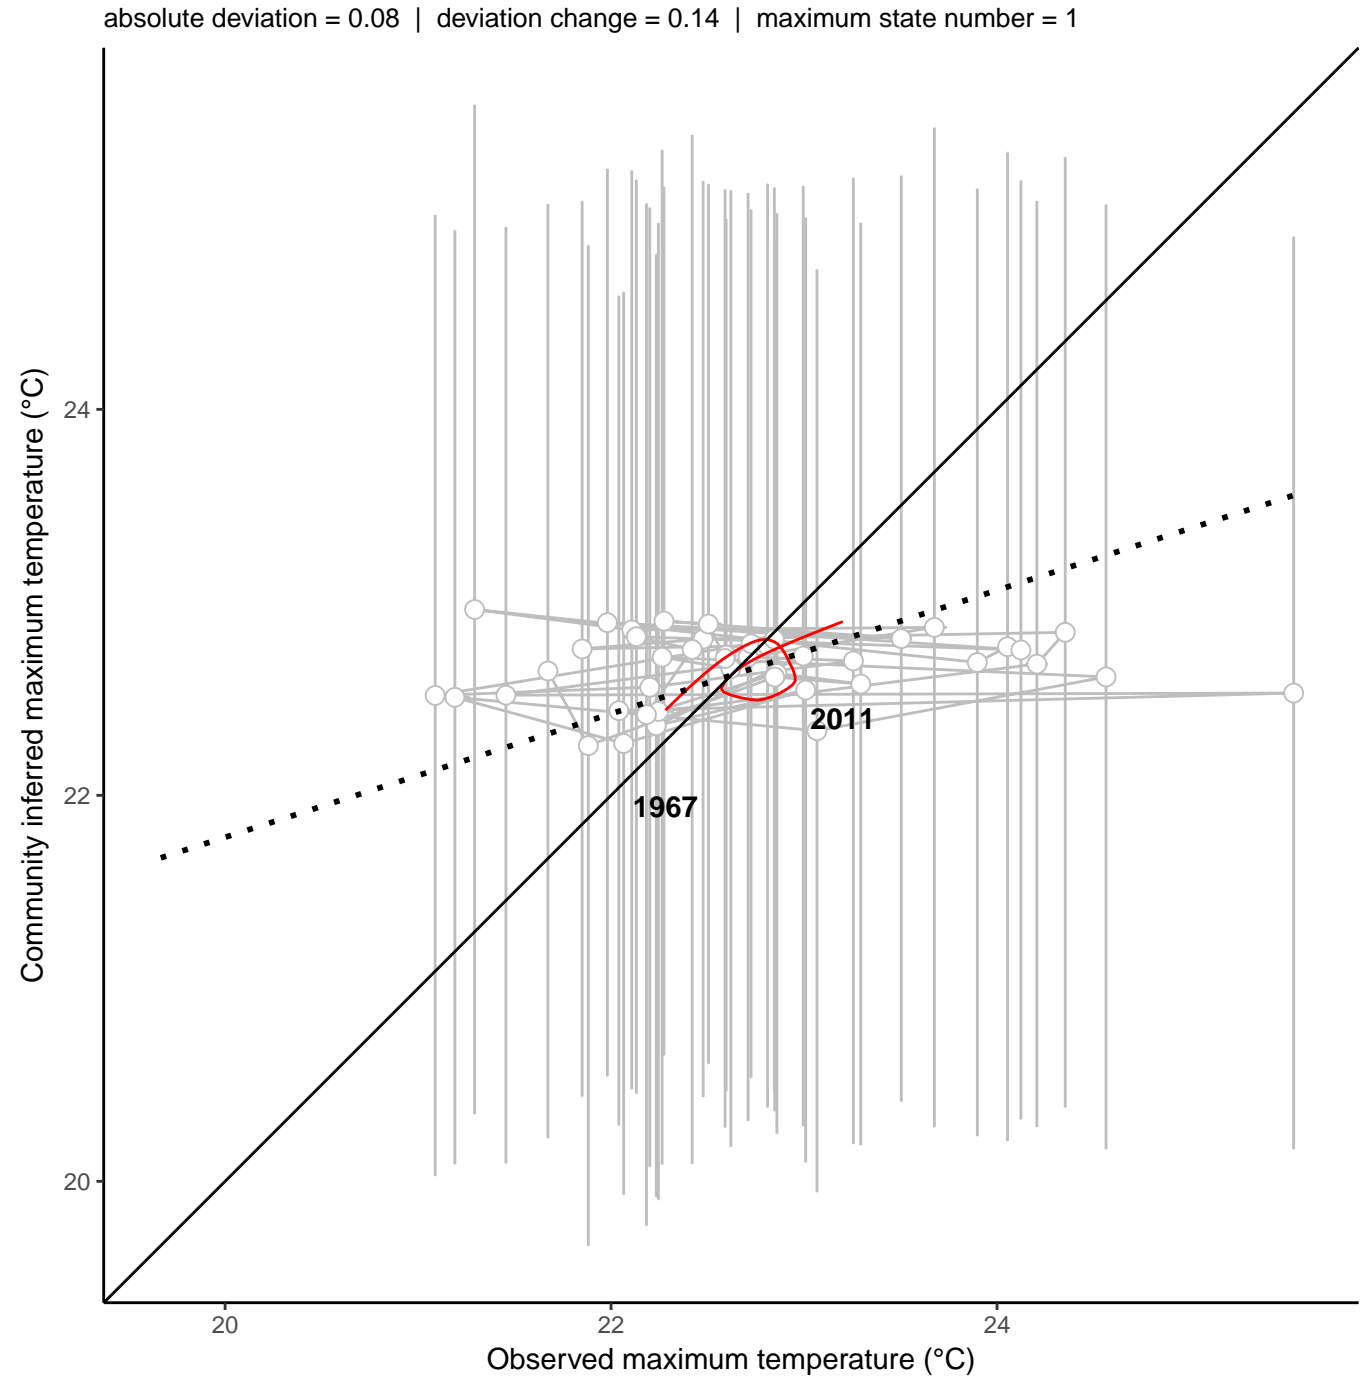

site : 840\_66\_40

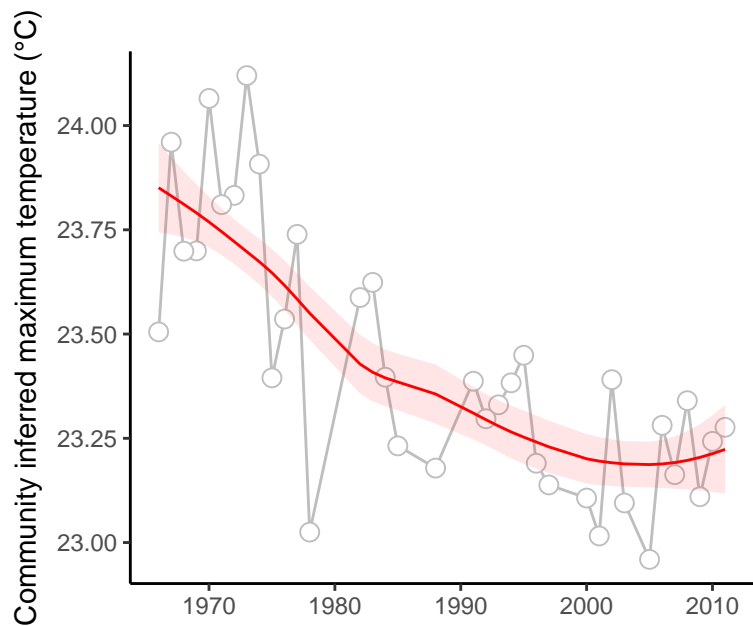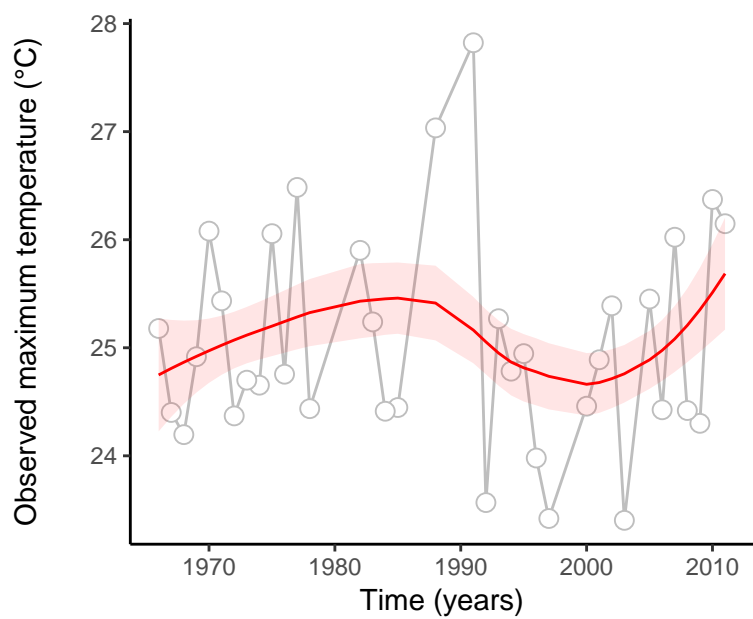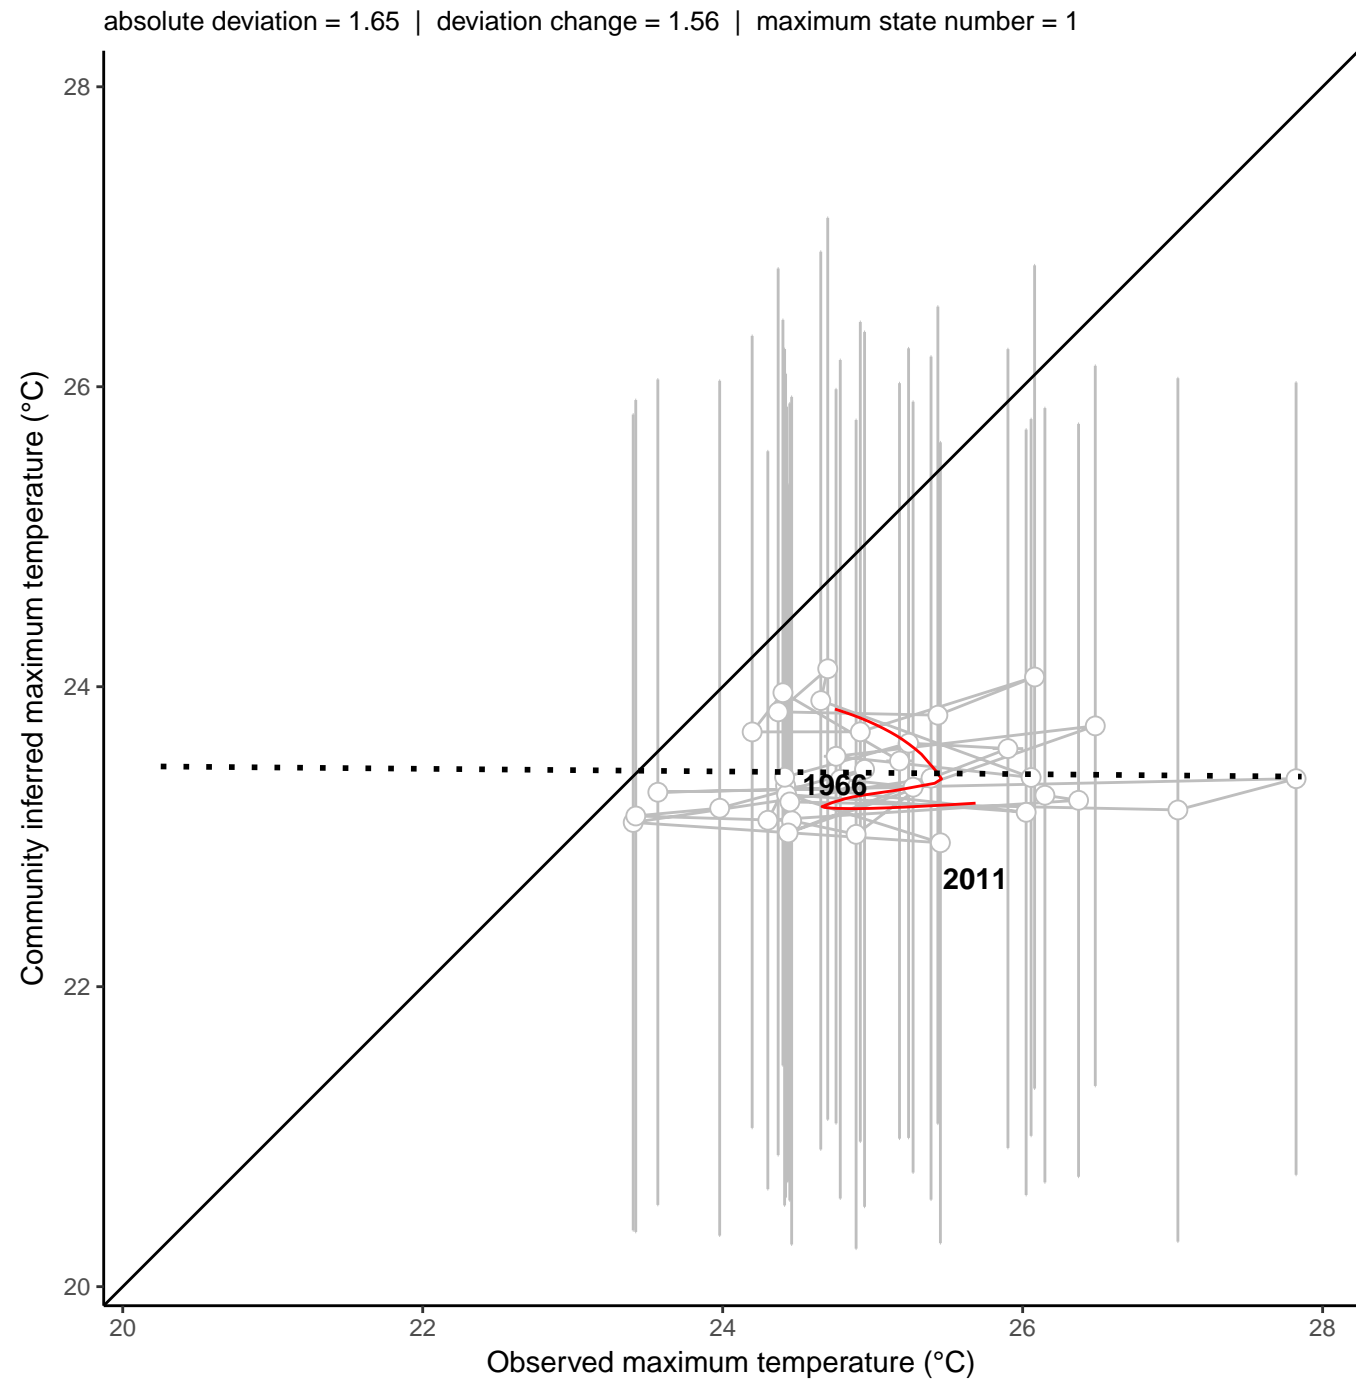

site : 840\_66\_6

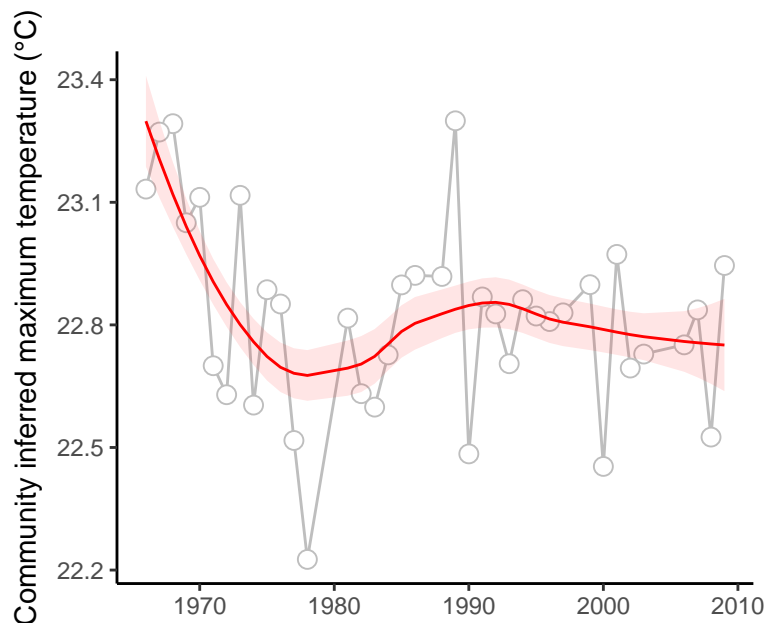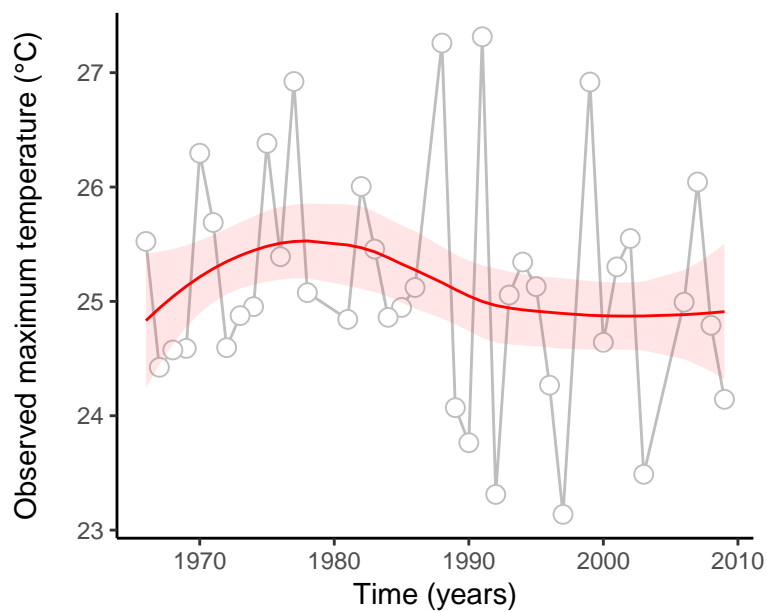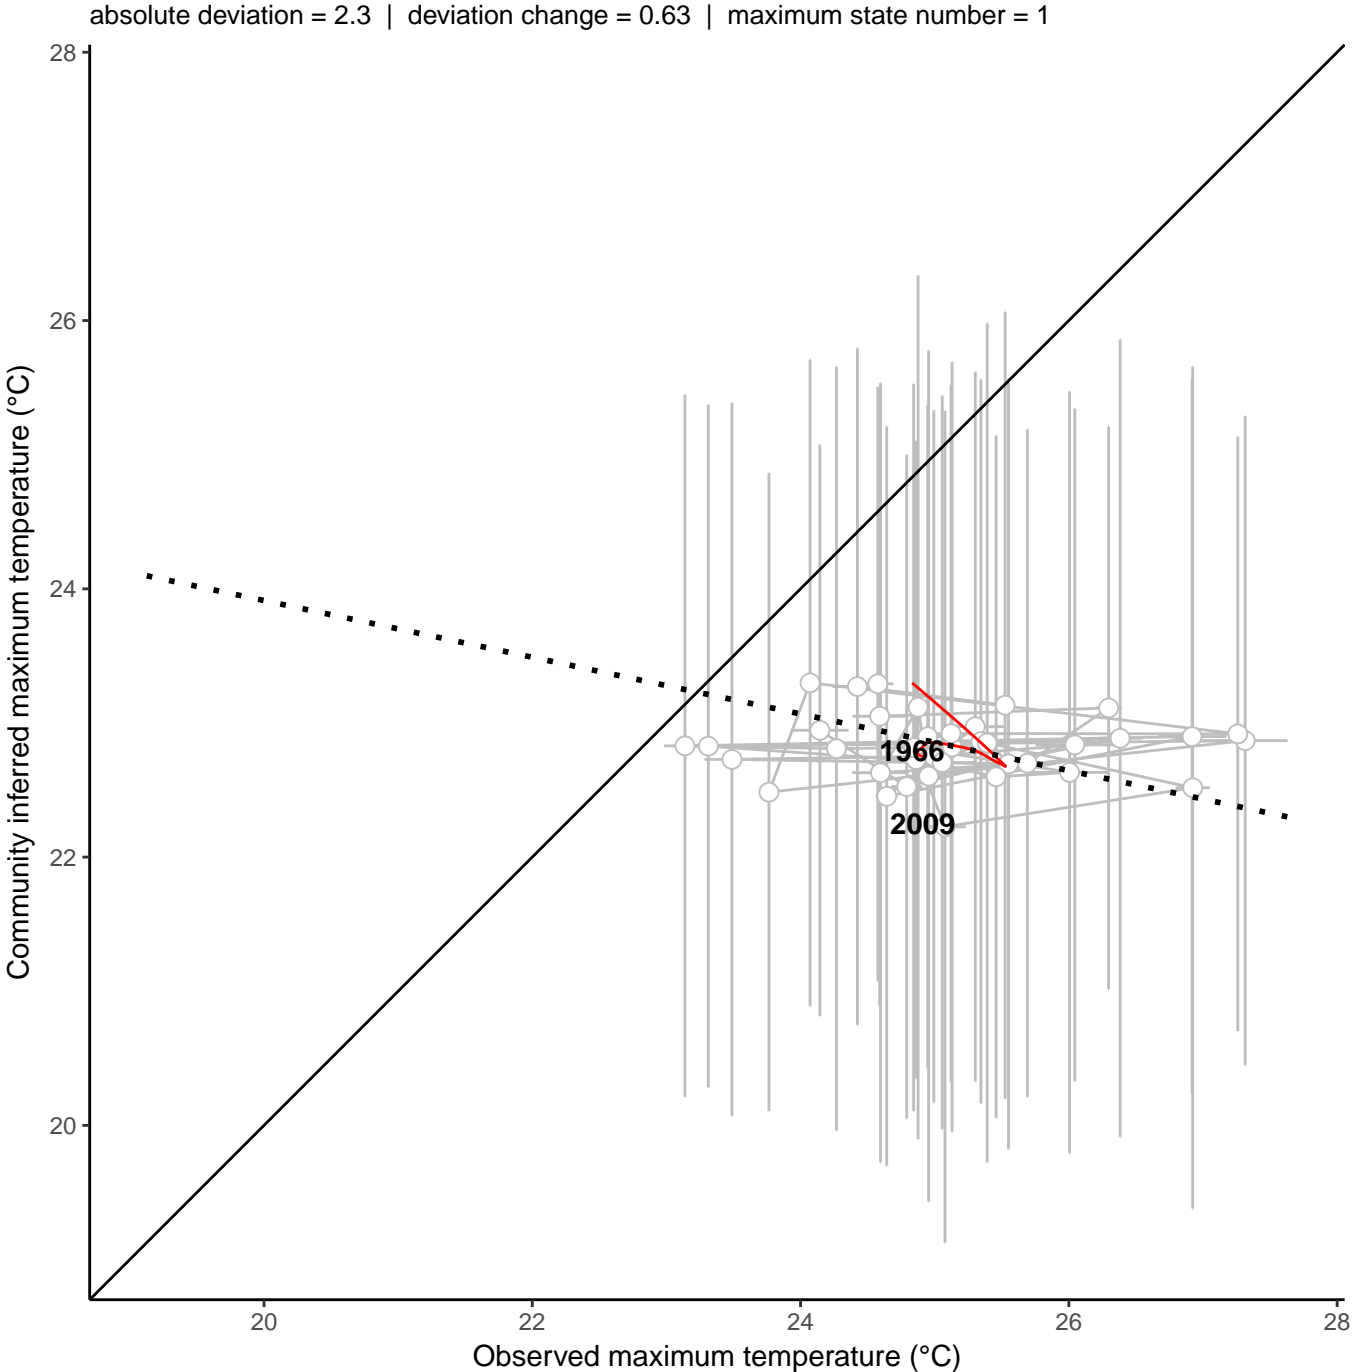

site : 840\_66\_74

absolute deviation = 2.39 | deviation change = 0.98 | maximum state number = 1

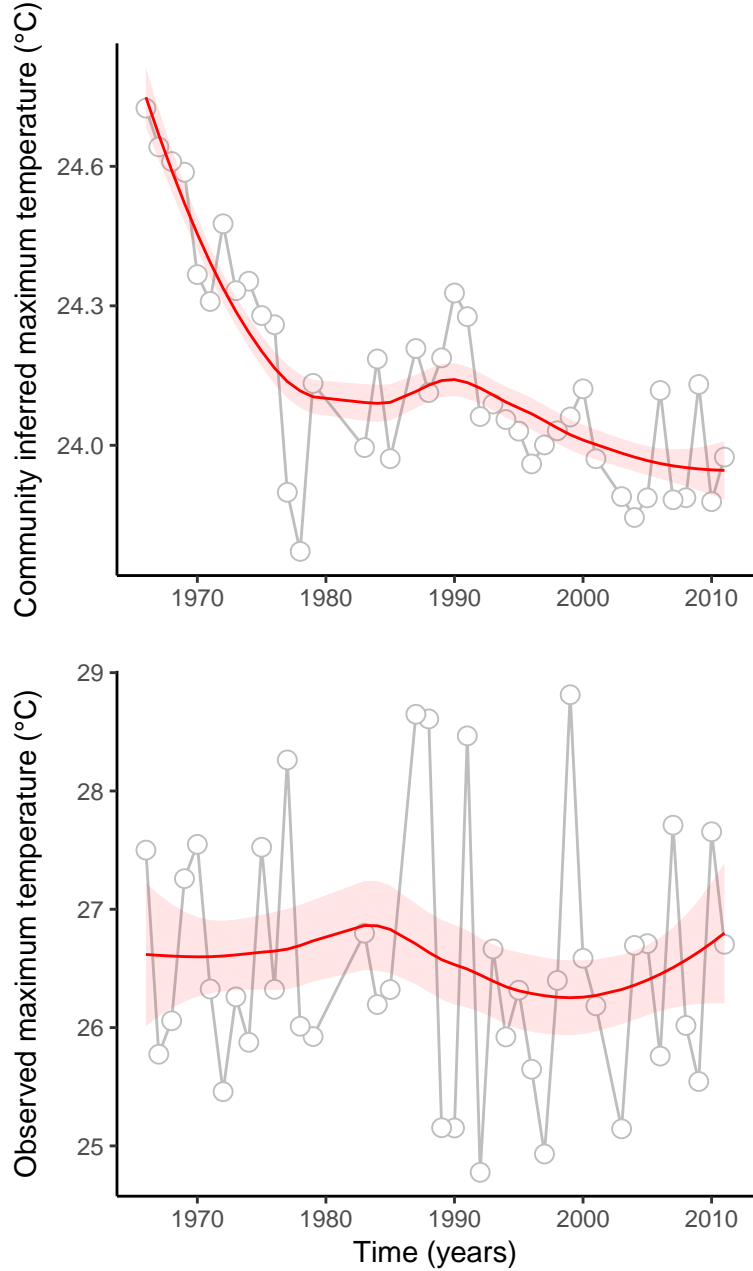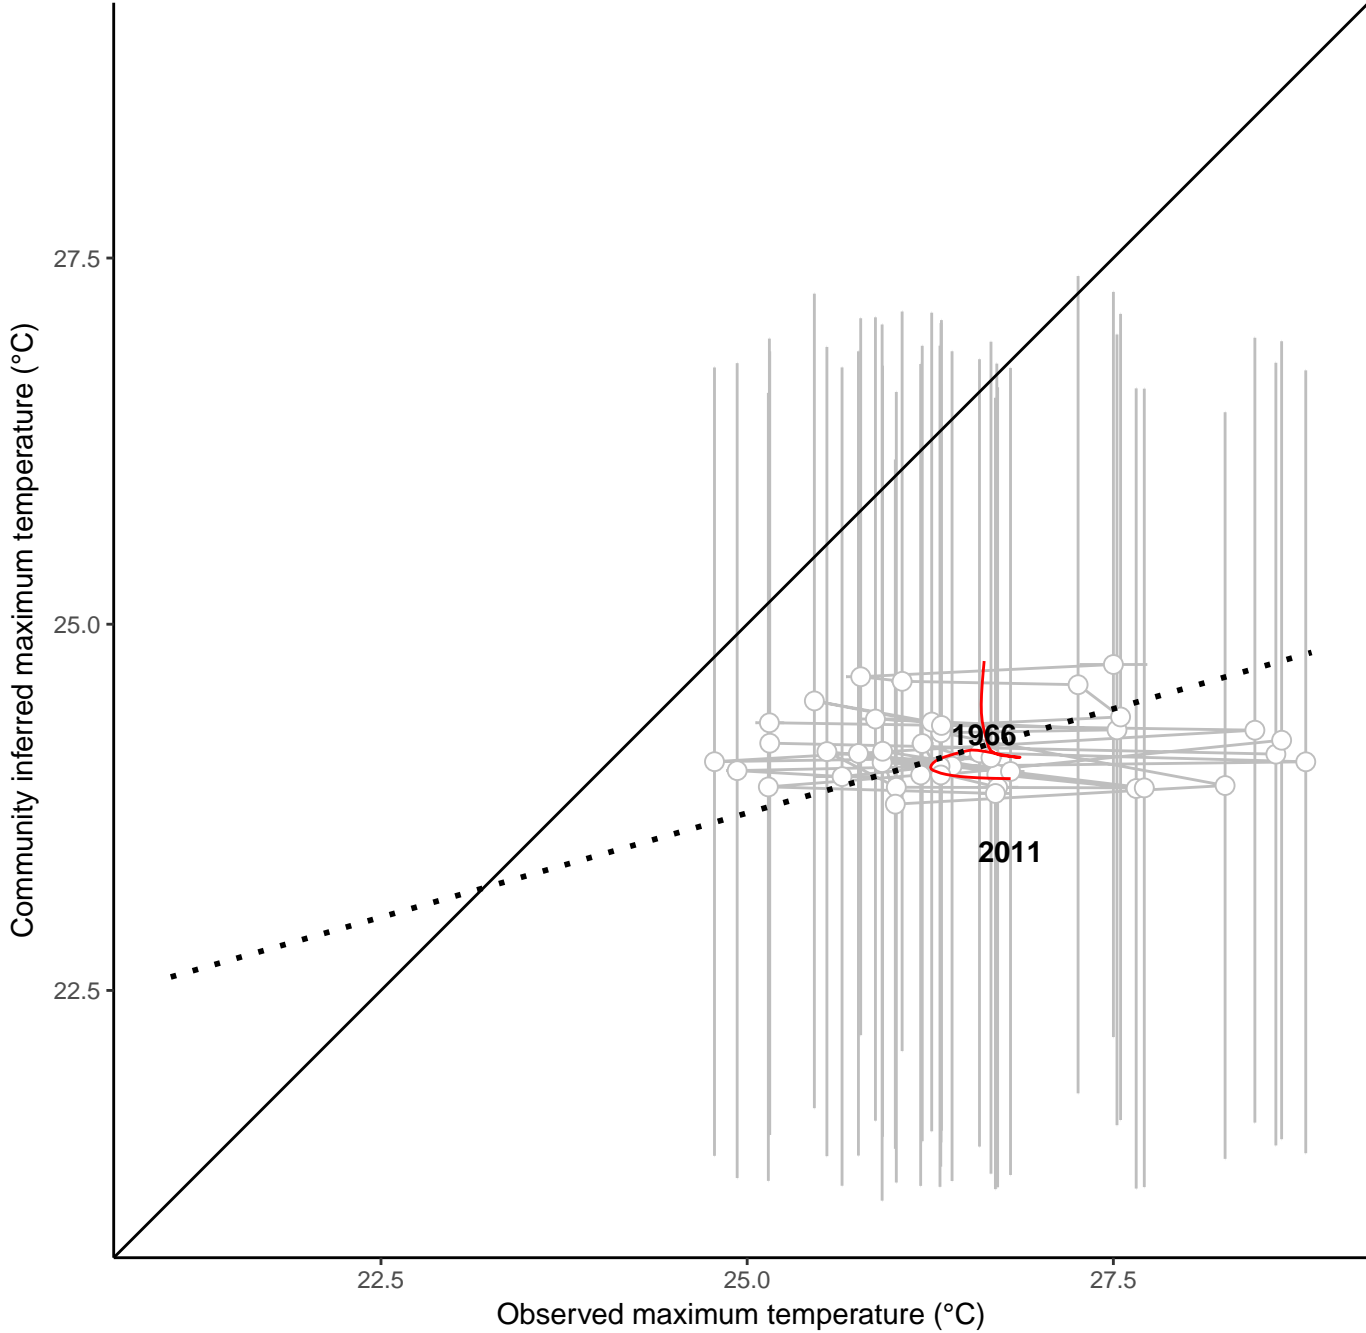

site : 840\_72\_25

absolute deviation = 1.72 | deviation change = 1.17 | maximum state number = 1

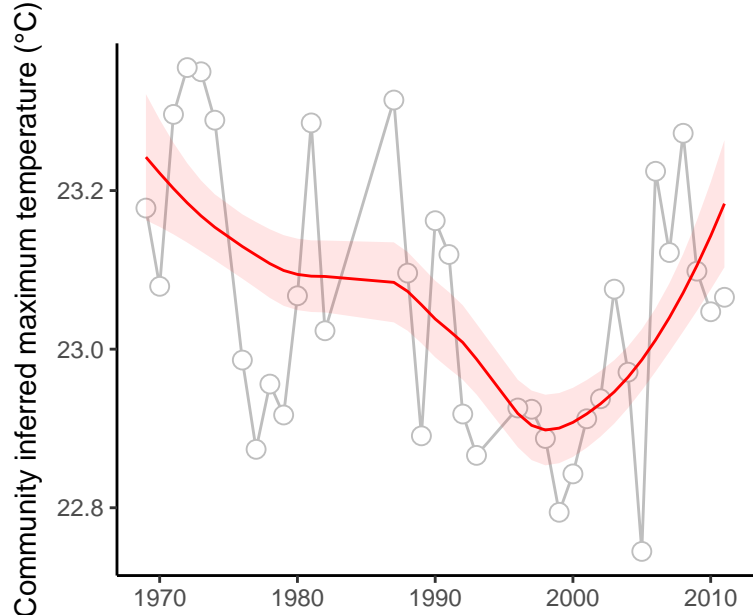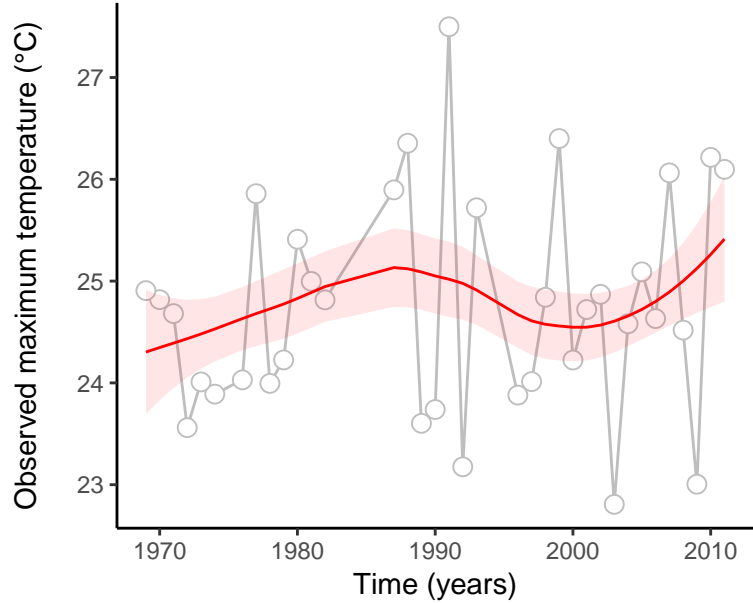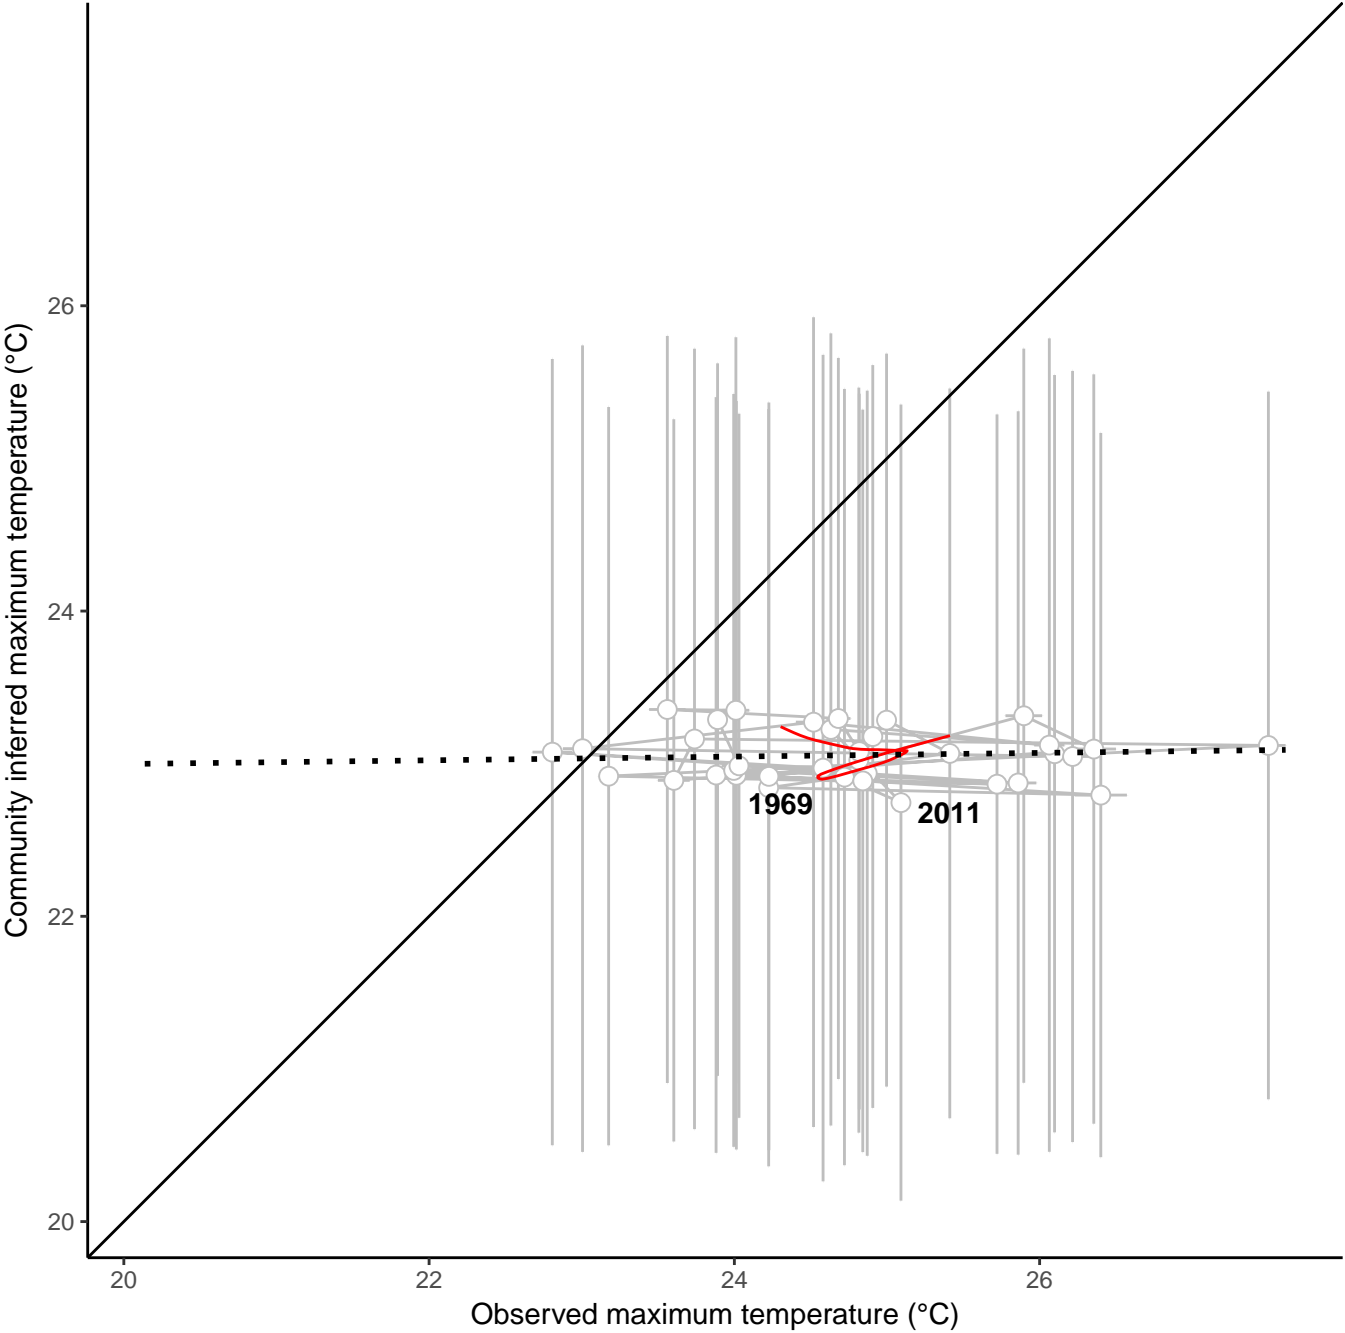

site : 840\_90\_33

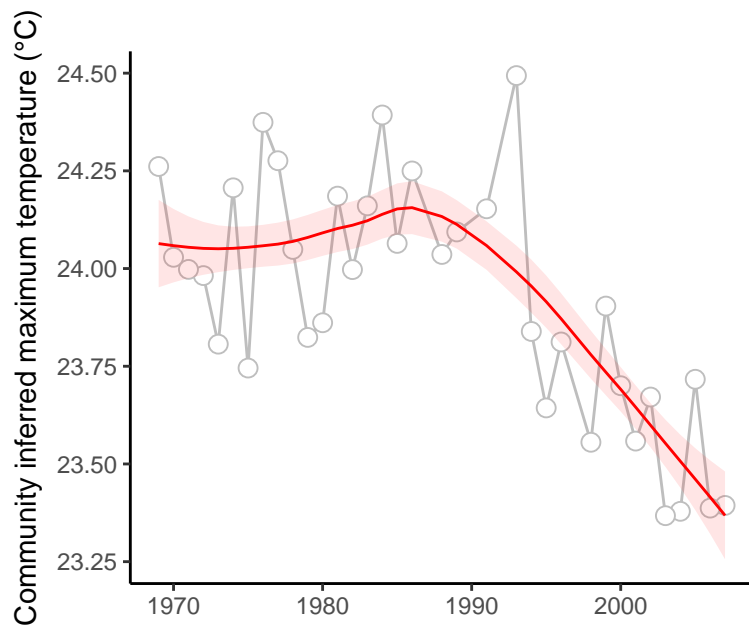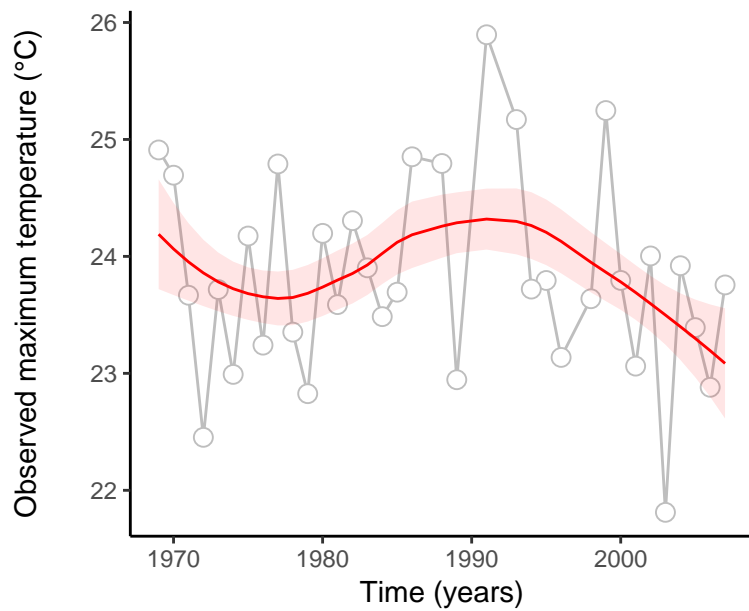

absolute deviation = 0.08 | deviation change = 0.16 | maximum state number = 1

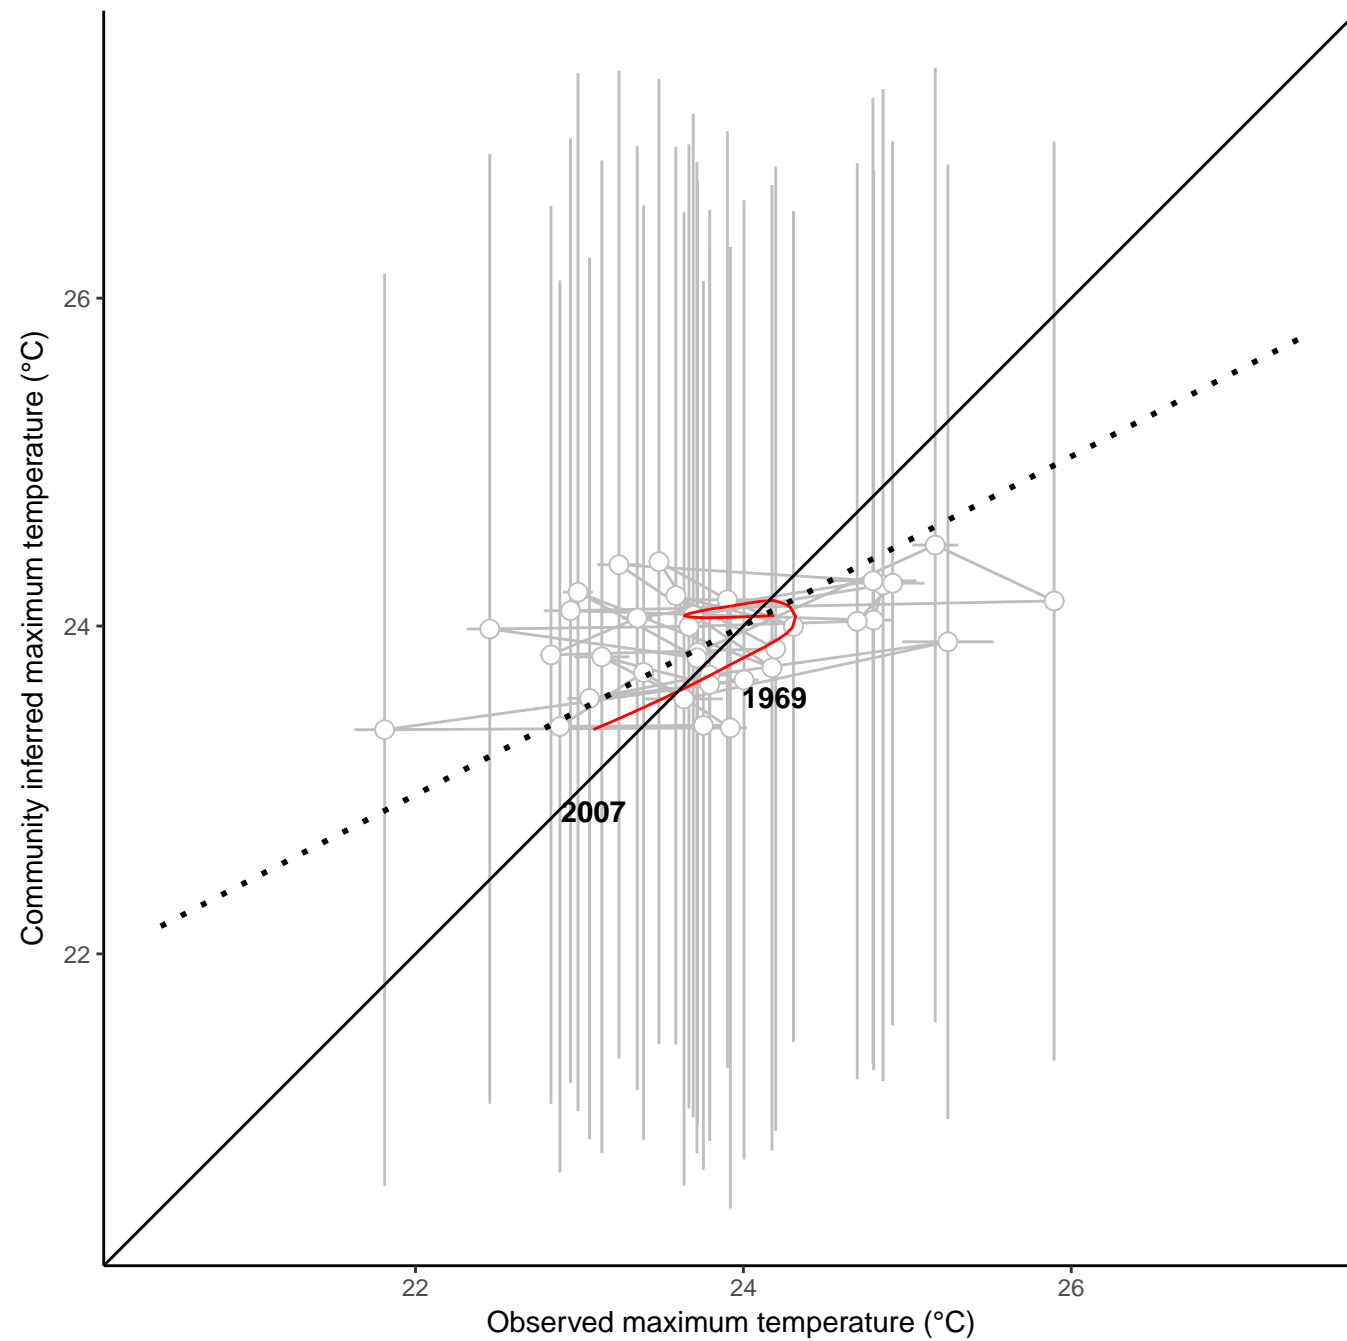



site : 840\_91\_14

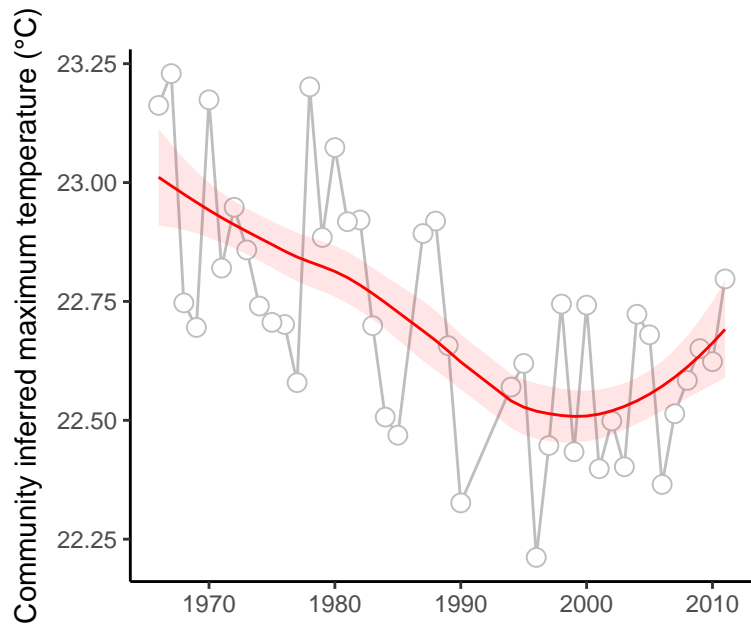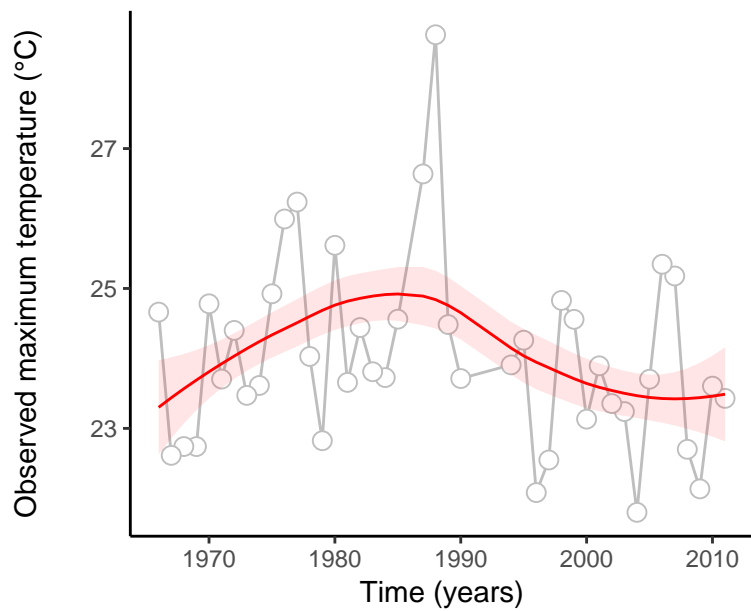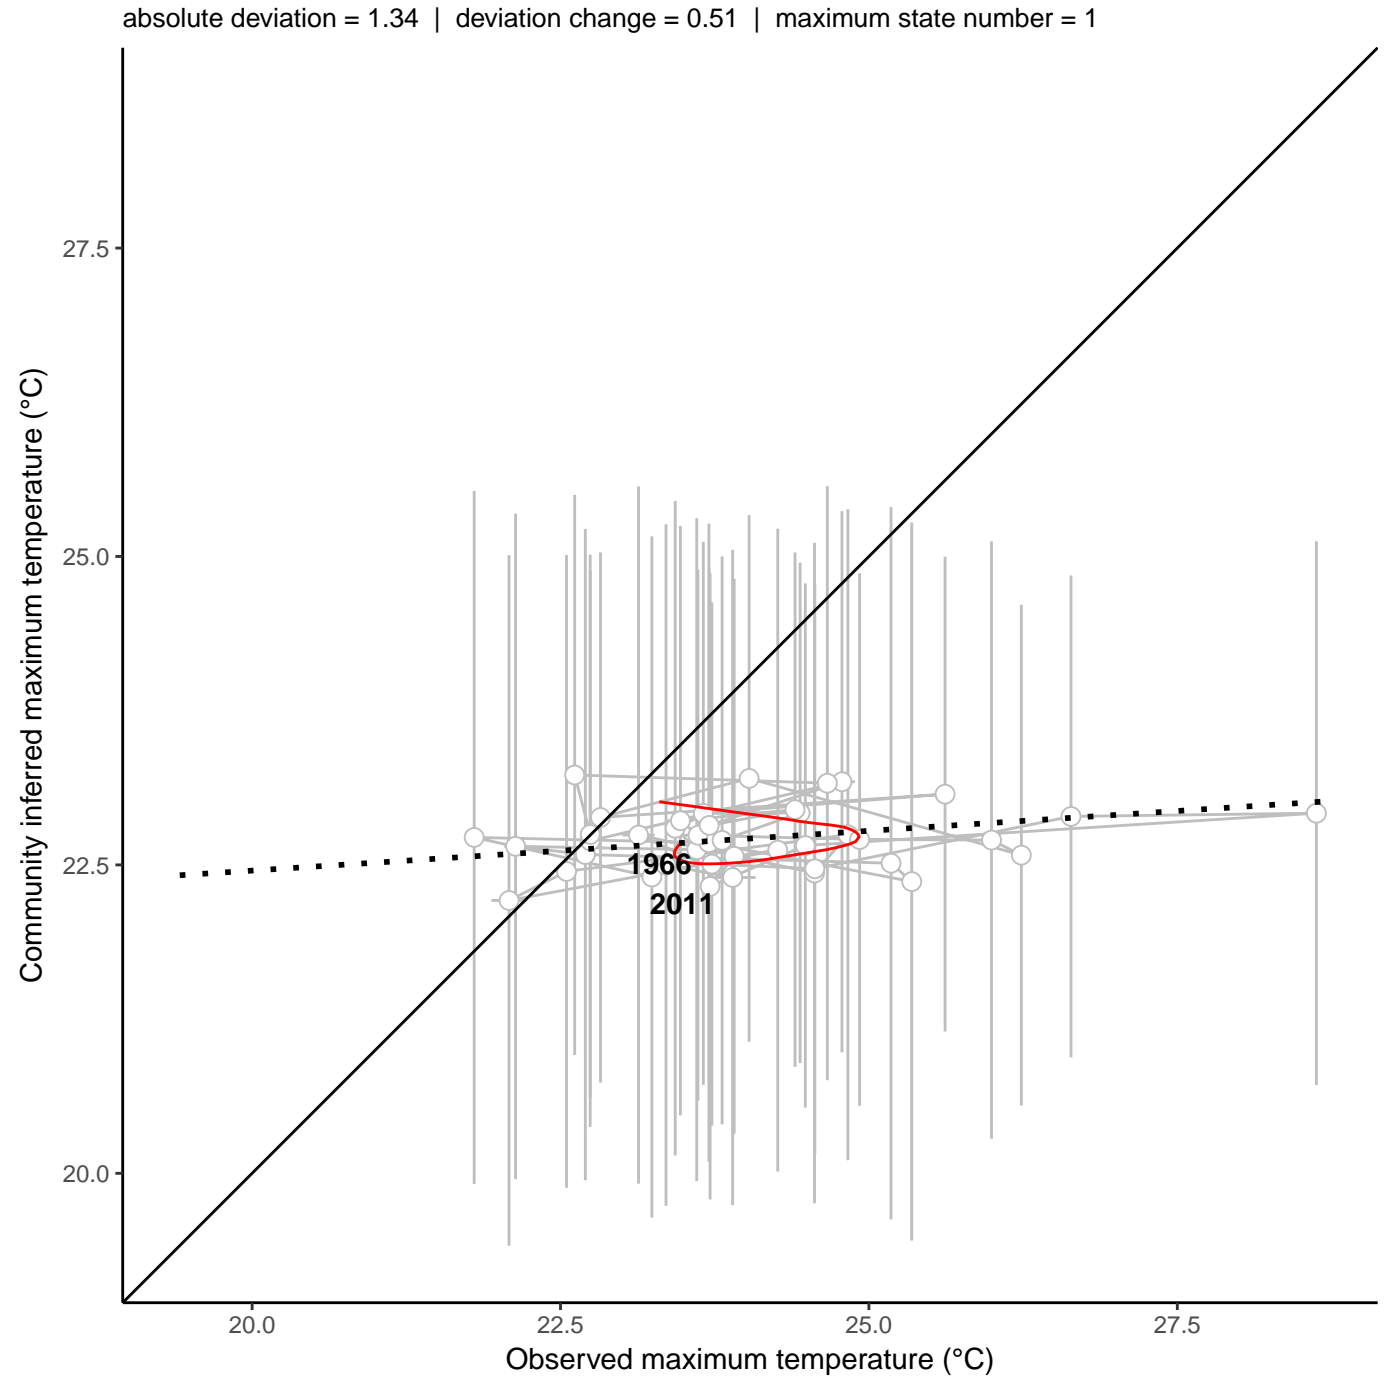

site : 840\_91\_68

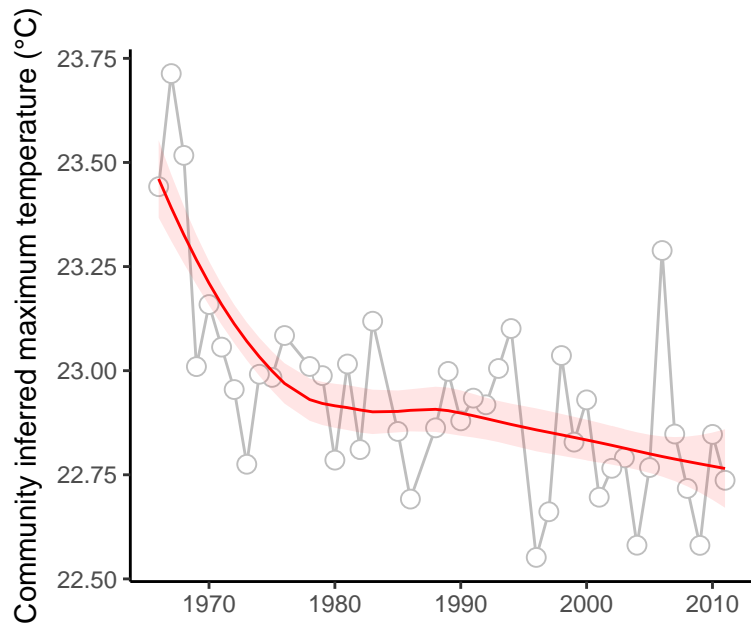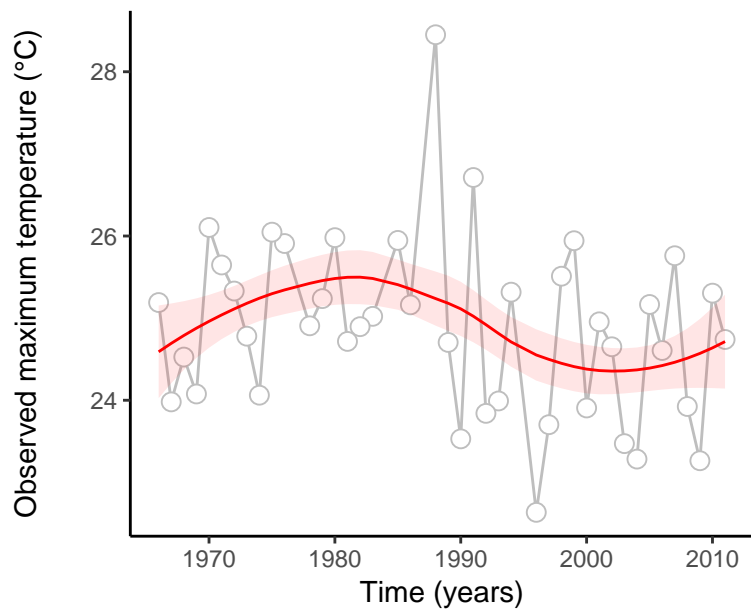

absolute deviation = 1.94 | deviation change = 0.82 | maximum state number = 1

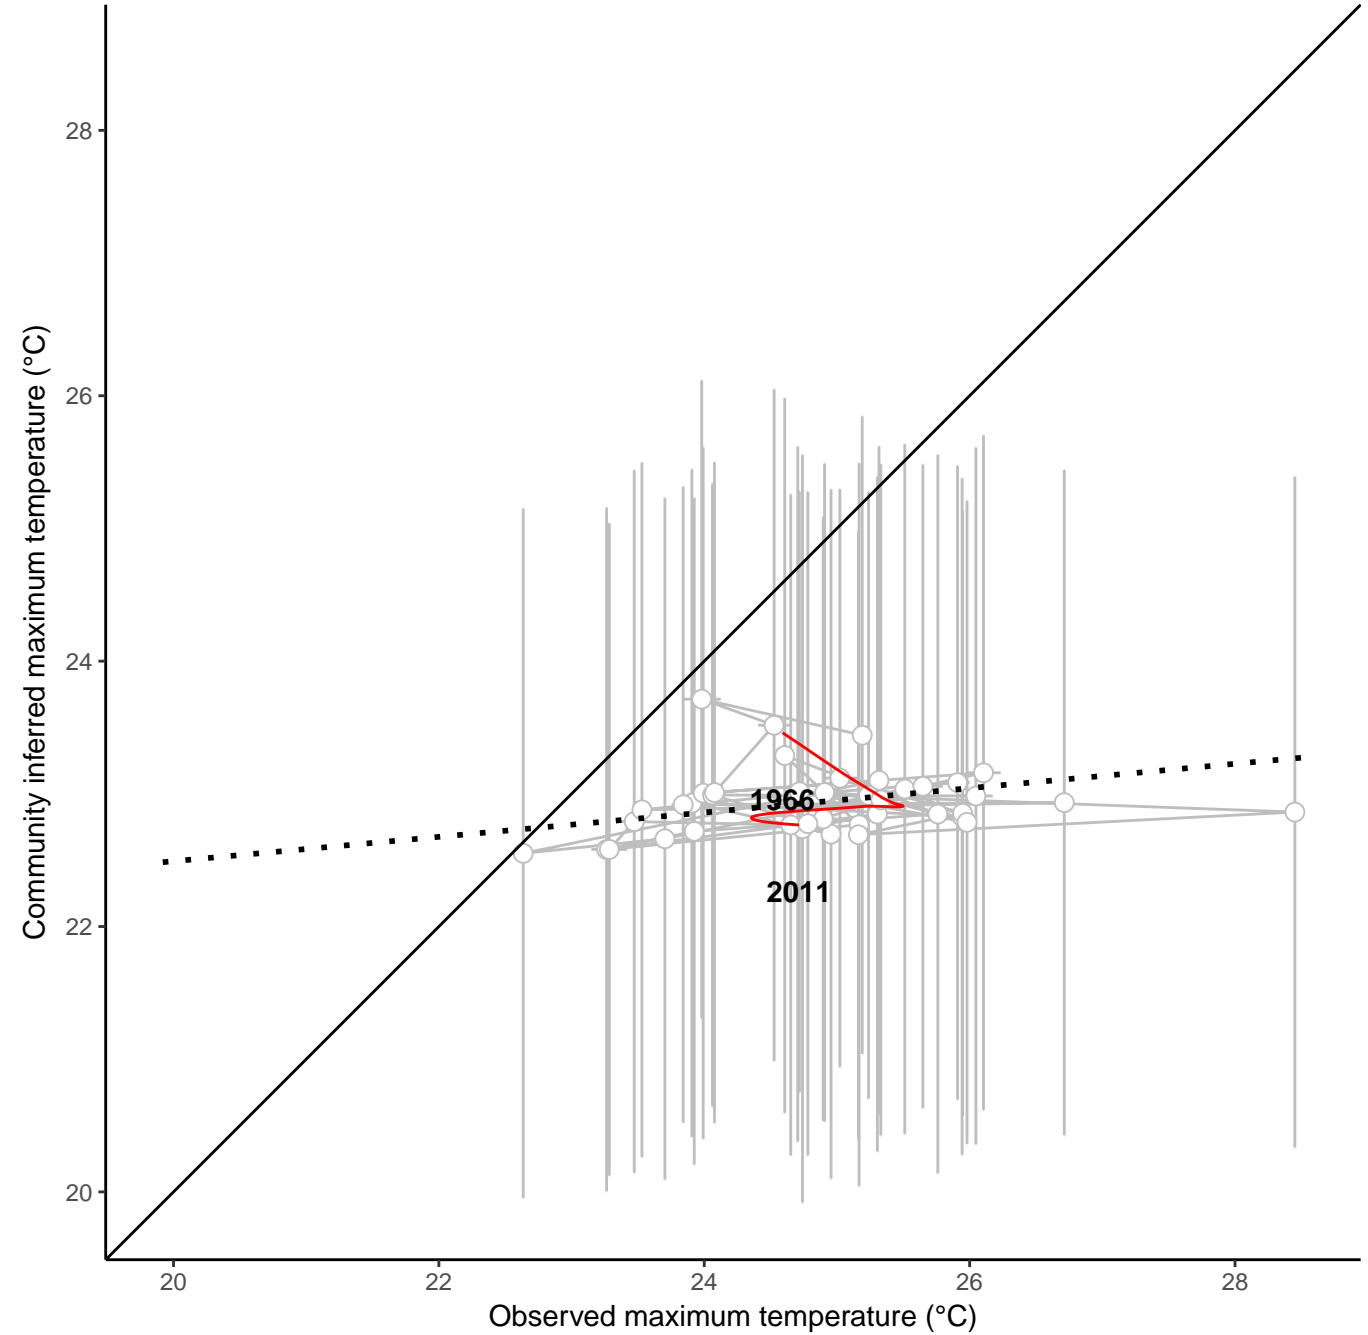

site : 840\_34\_21

absolute deviation = 3.32 | deviation change = 0.51 | maximum state number = 1

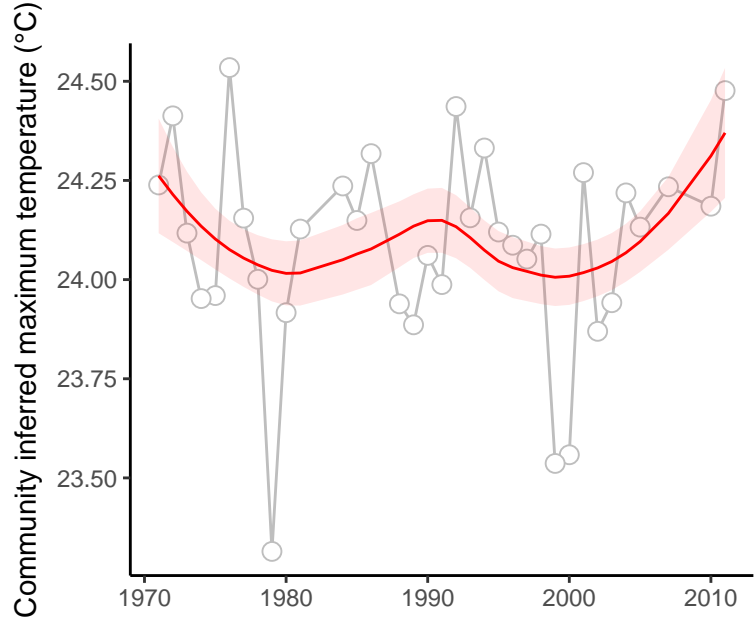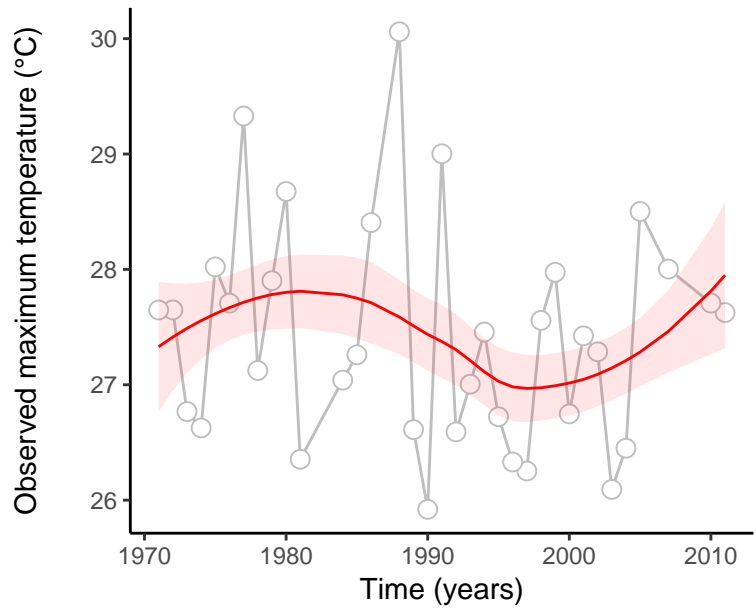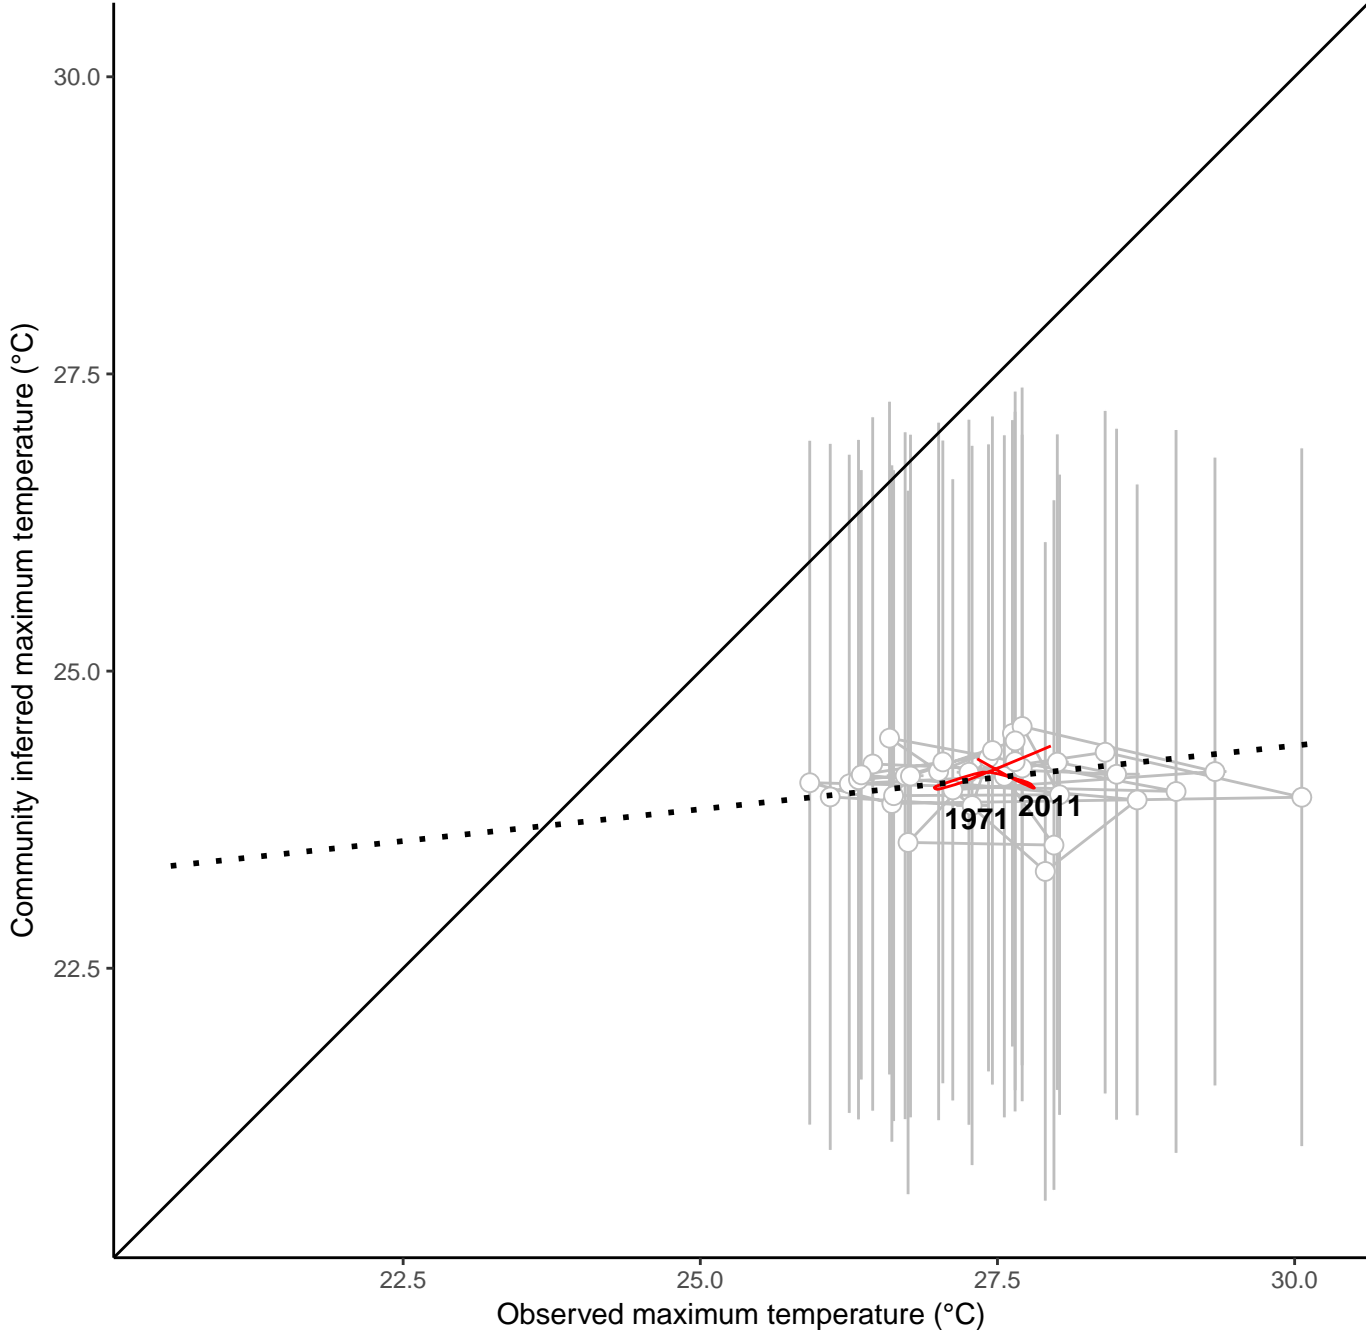

site : 840\_58\_3

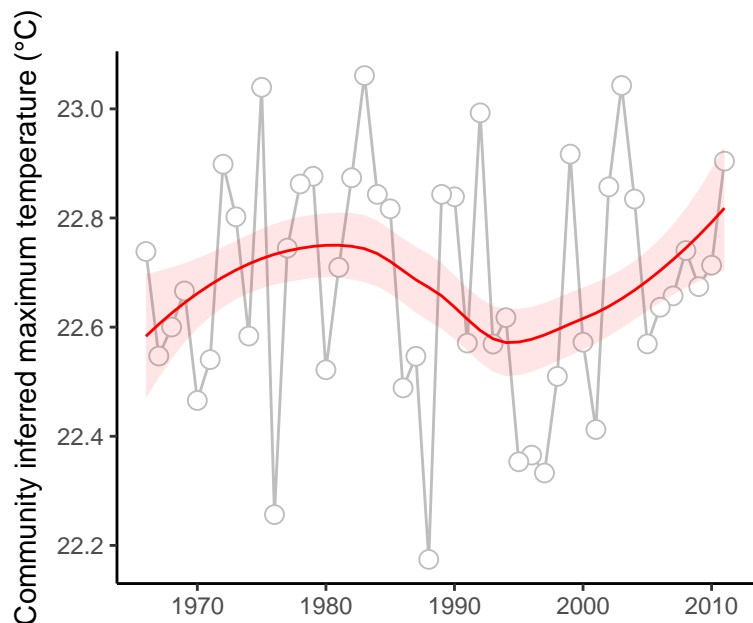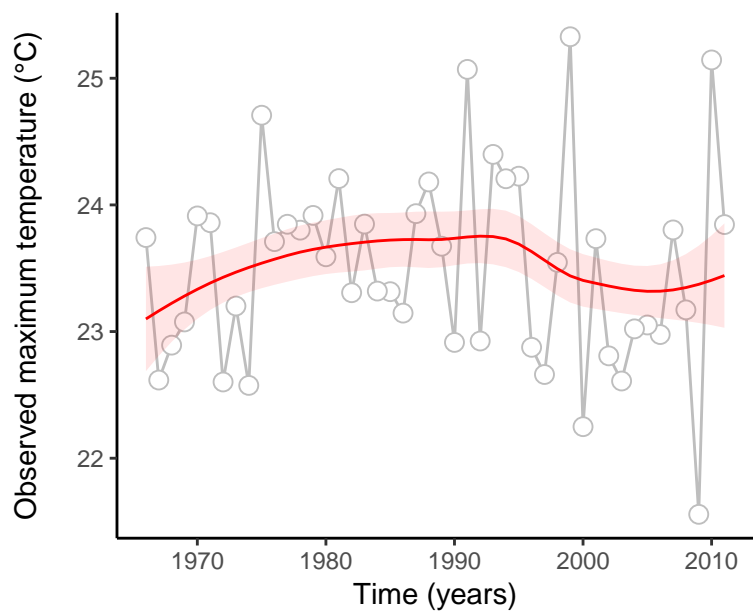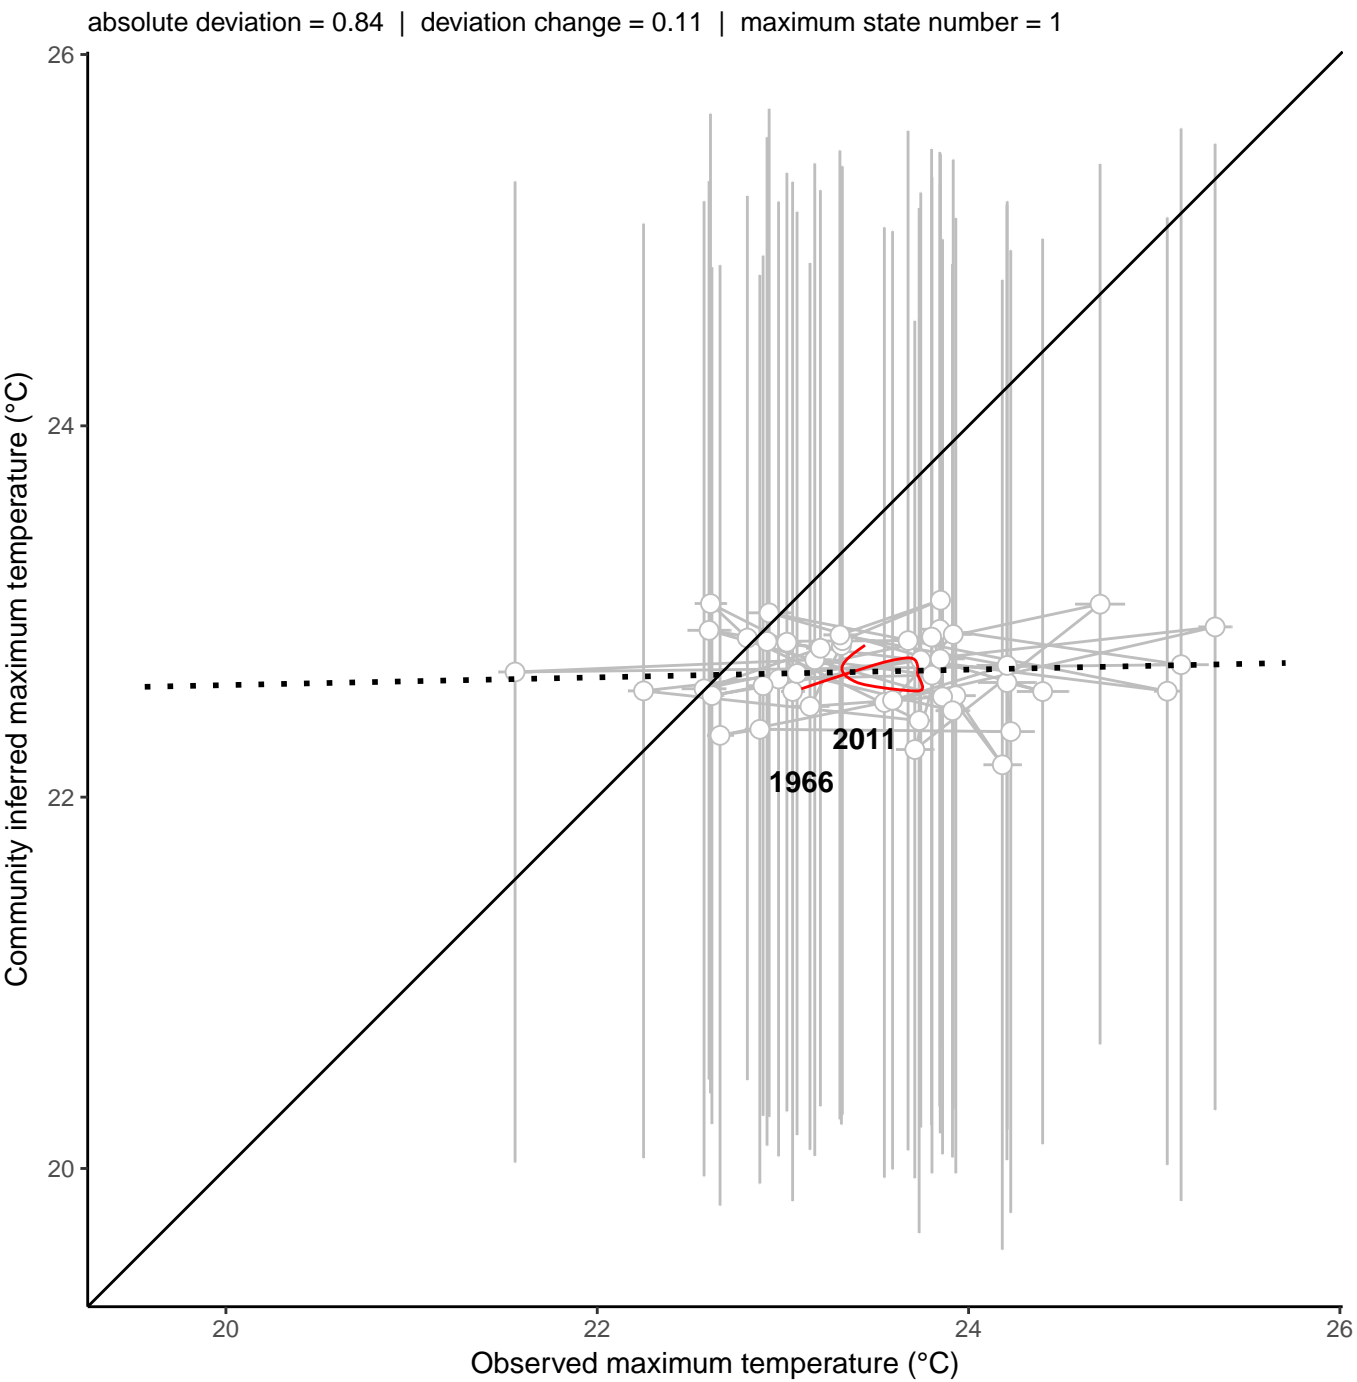

site : 840\_61\_66

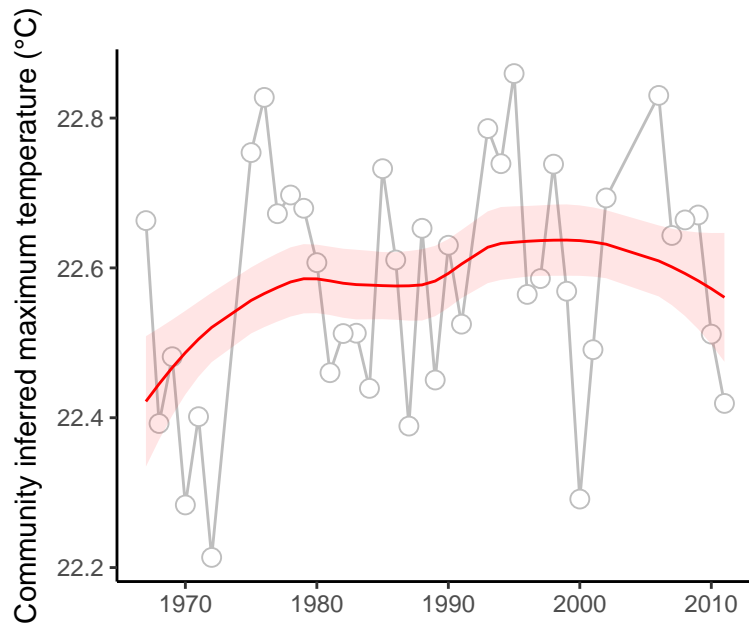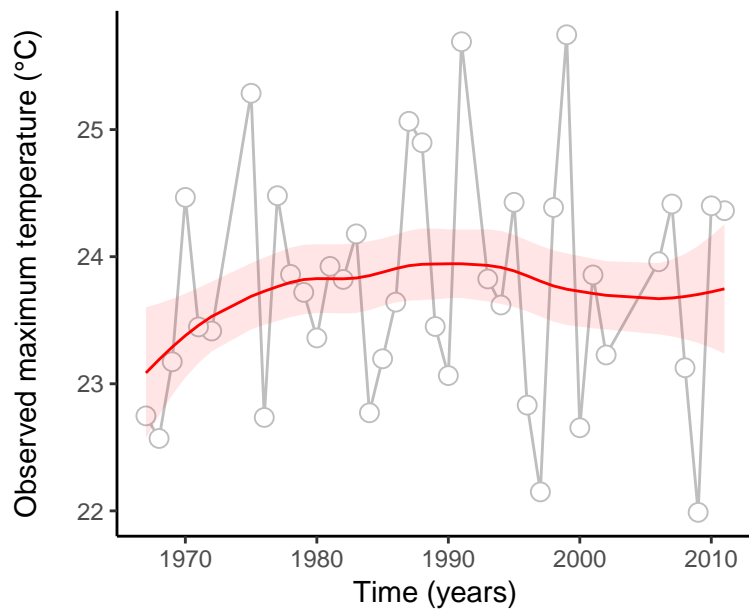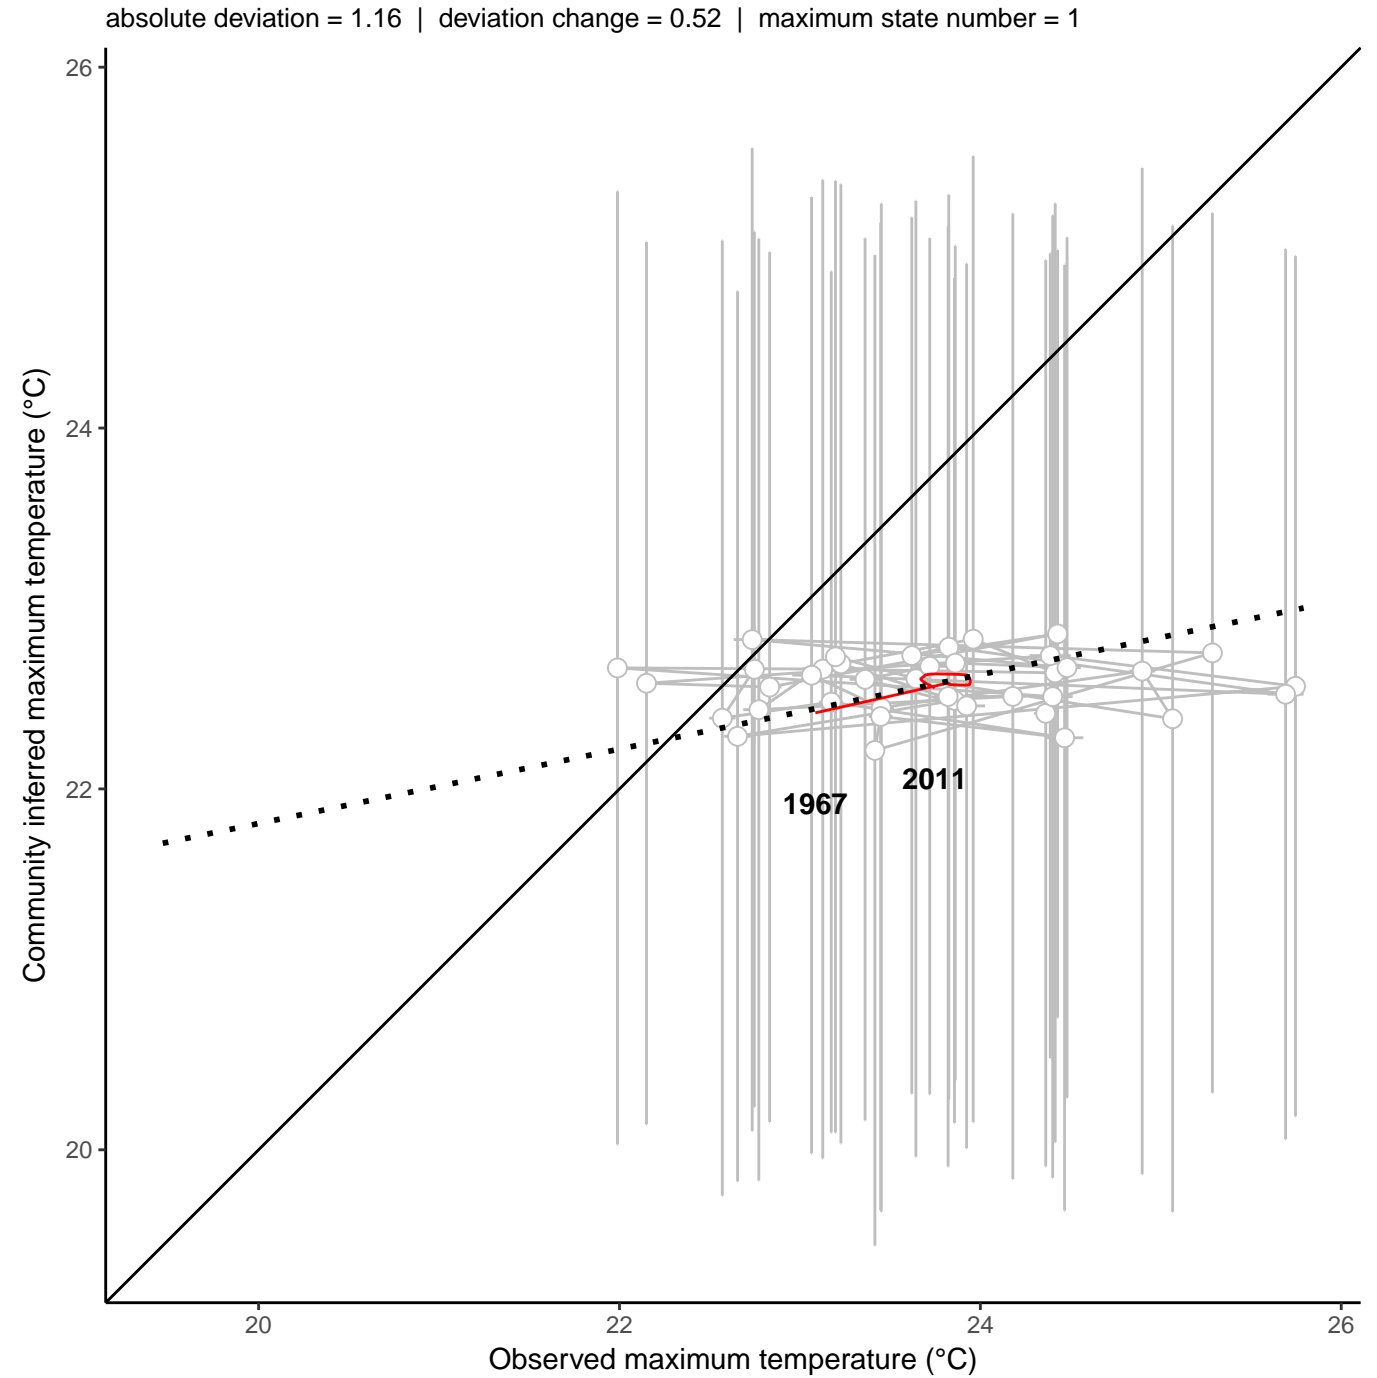

site : 840\_91\_52

absolute deviation = 1.17 | deviation change = 1.59 | maximum state number = 1

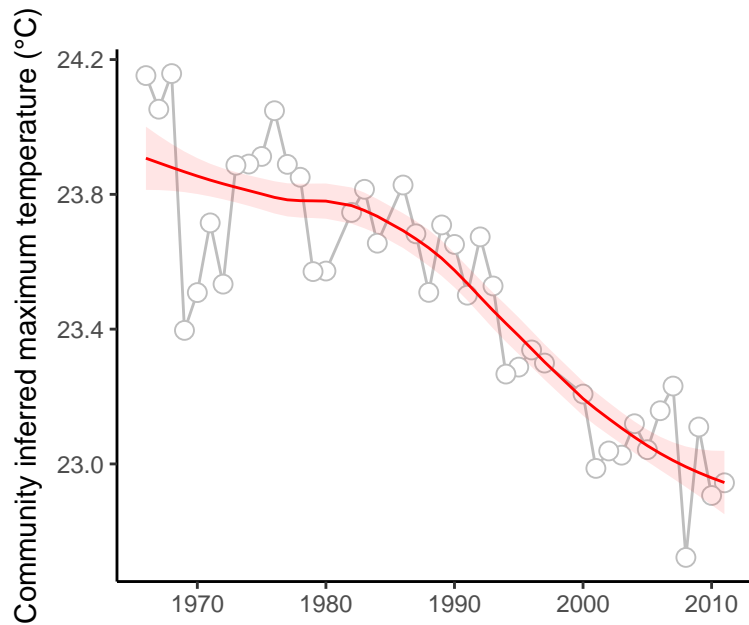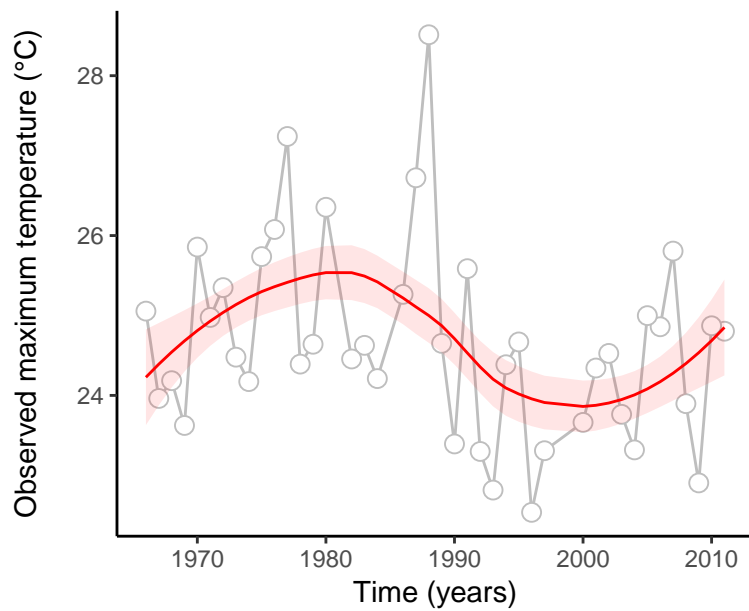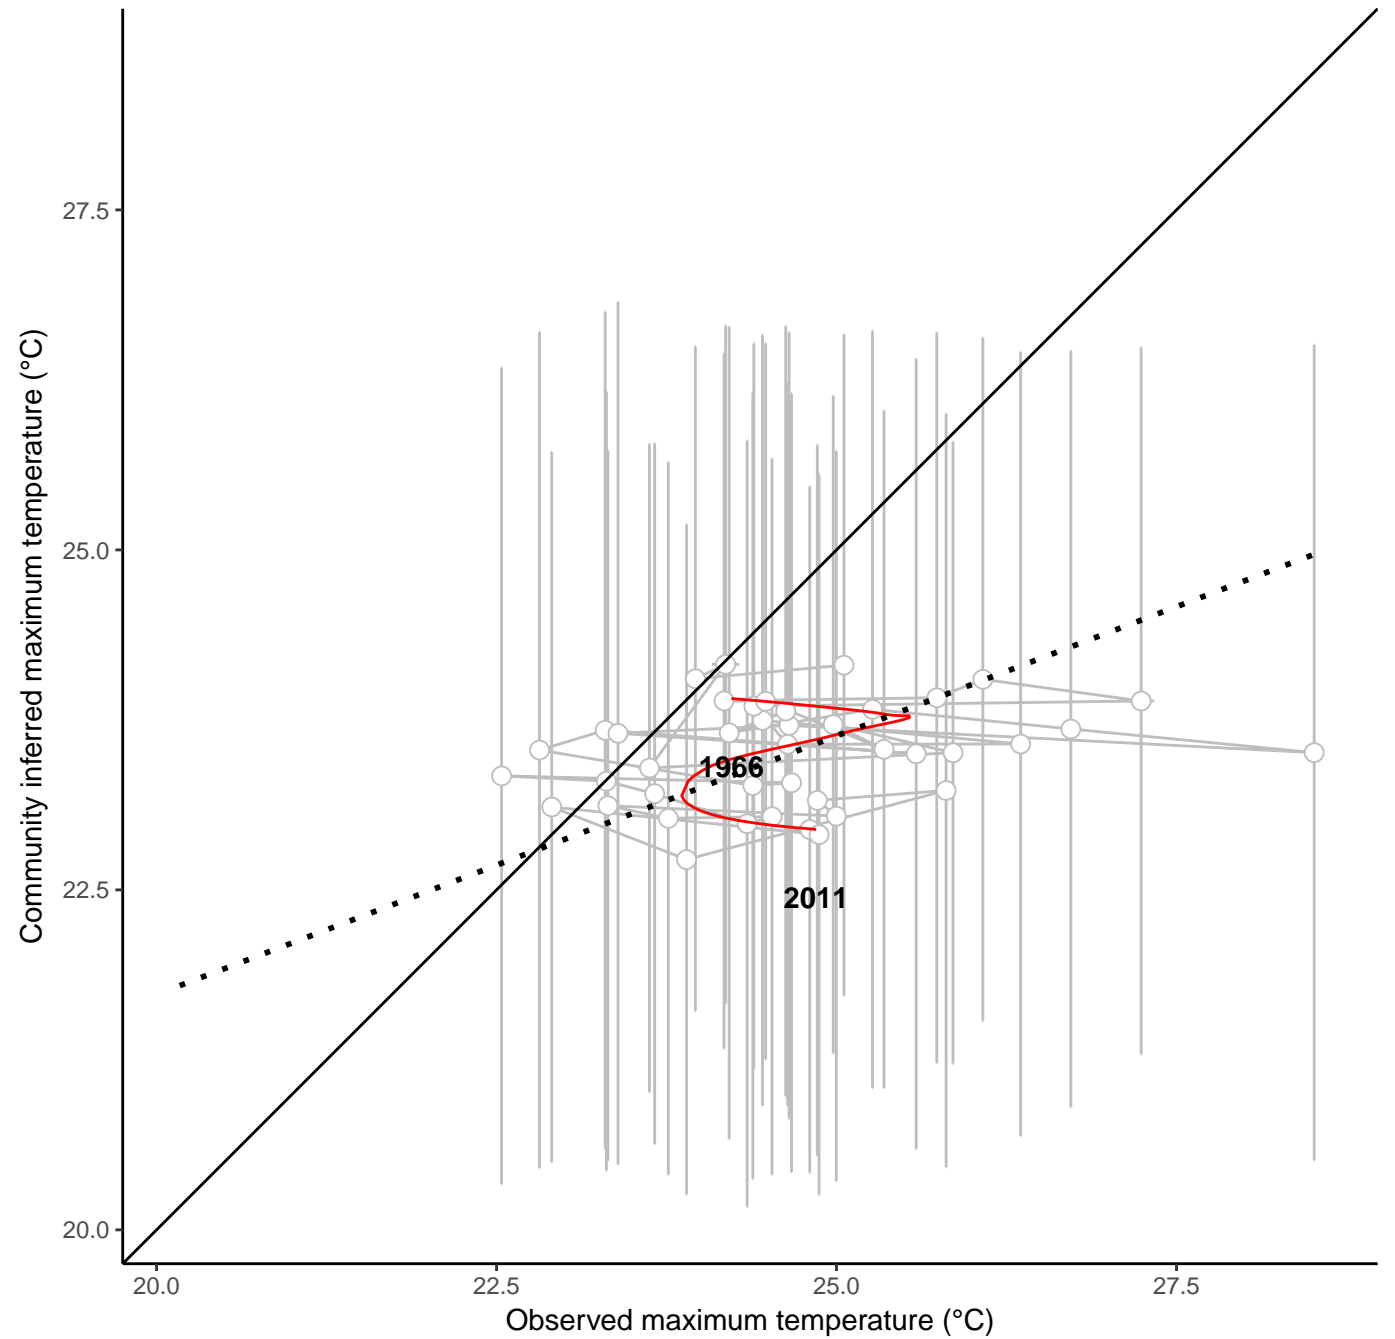

site : 840\_2\_17

absolute deviation = 4.16 | deviation change = 1.96 | maximum state number = 1

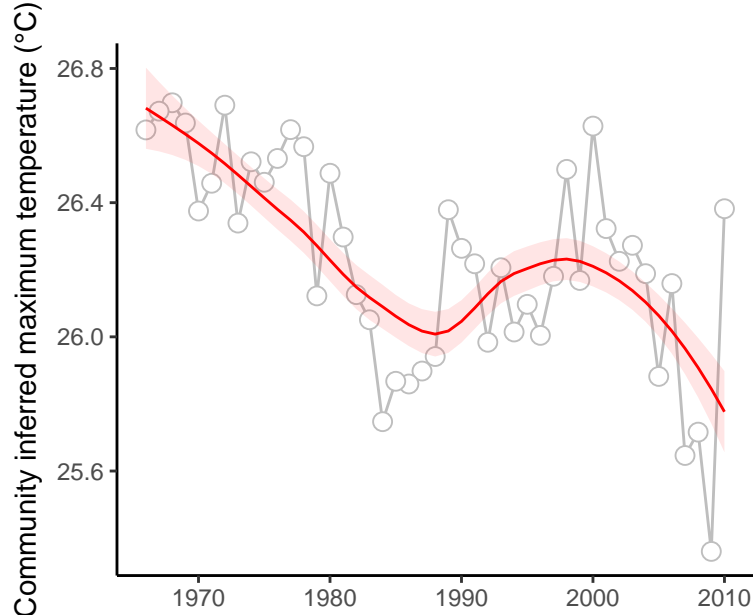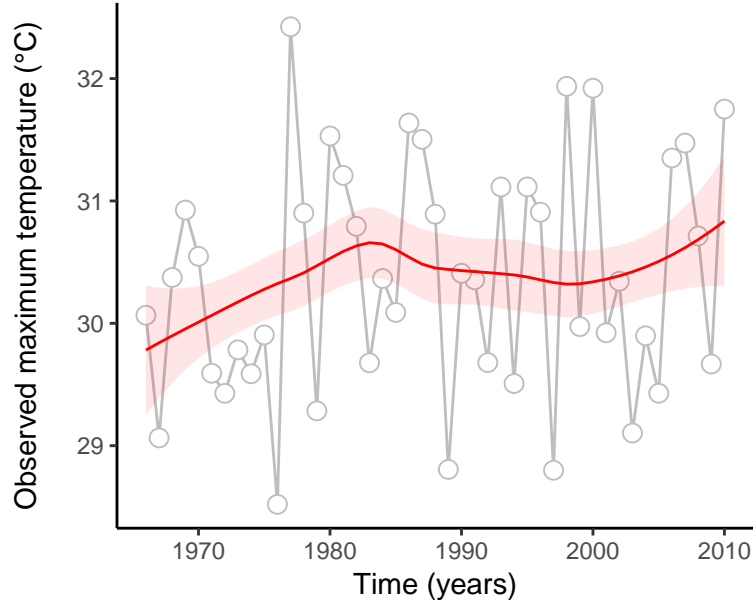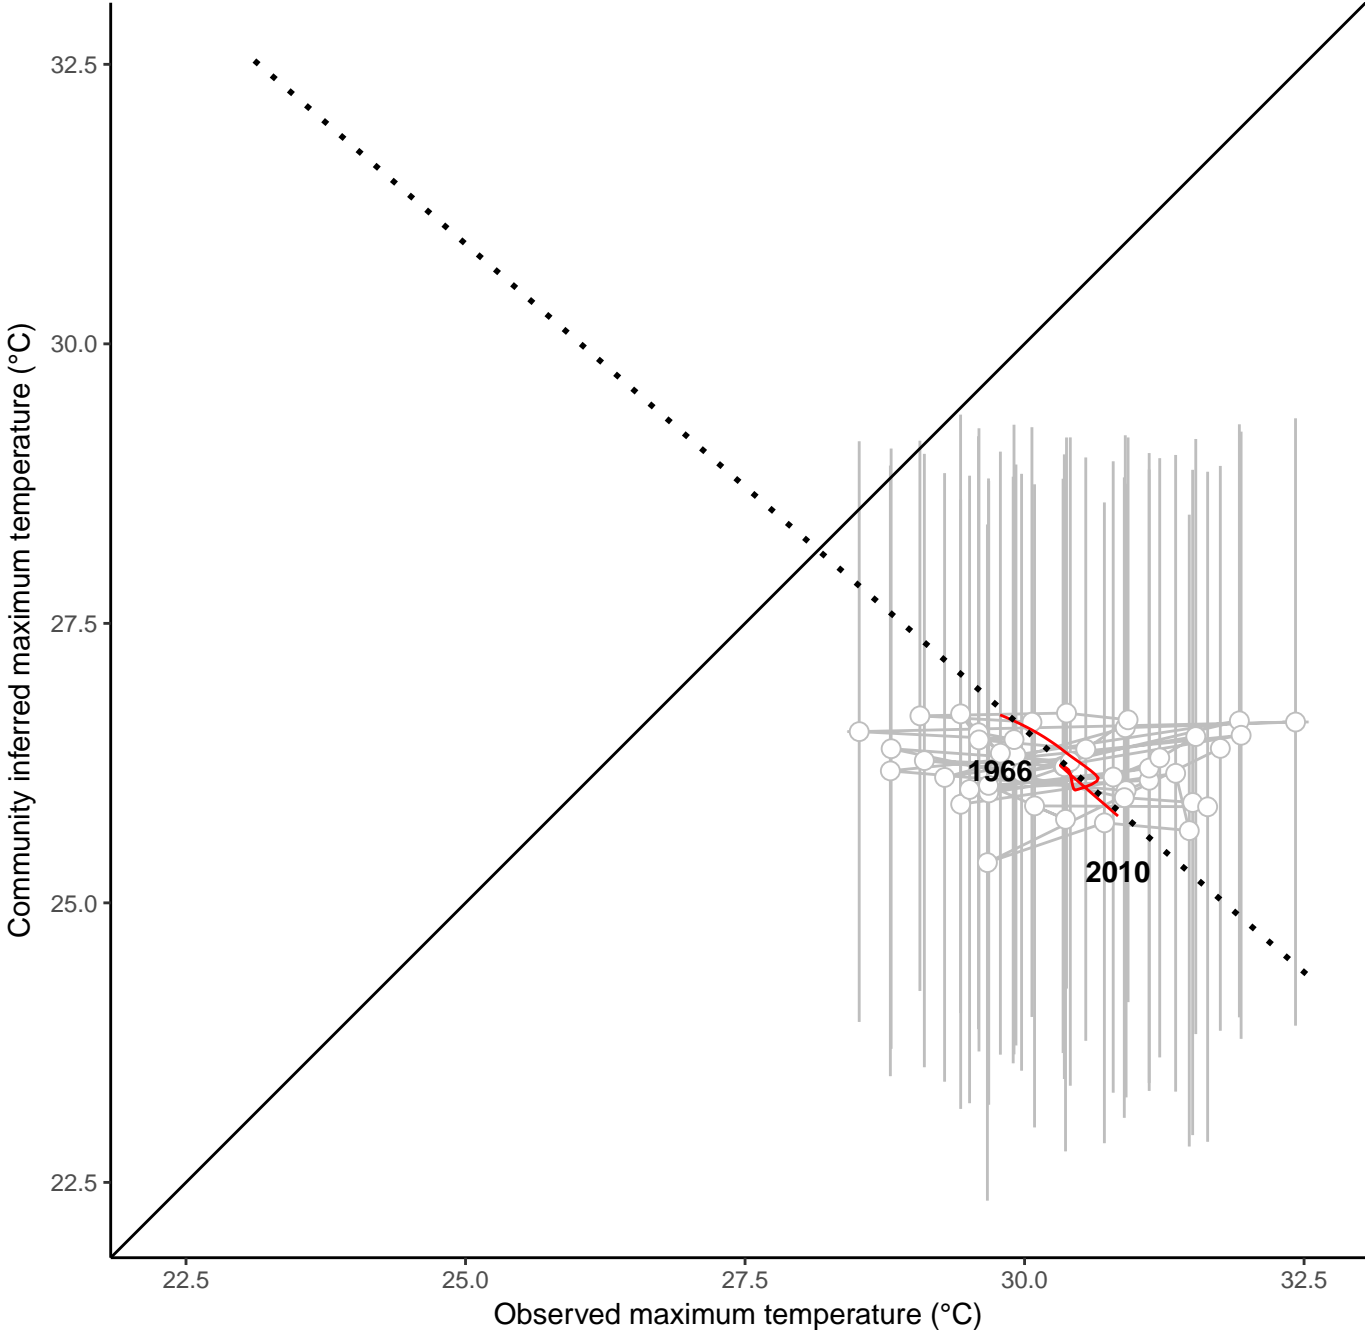

site : 840\_34\_22

absolute deviation = 3.23 | deviation change = 2.27 | maximum state number = 2

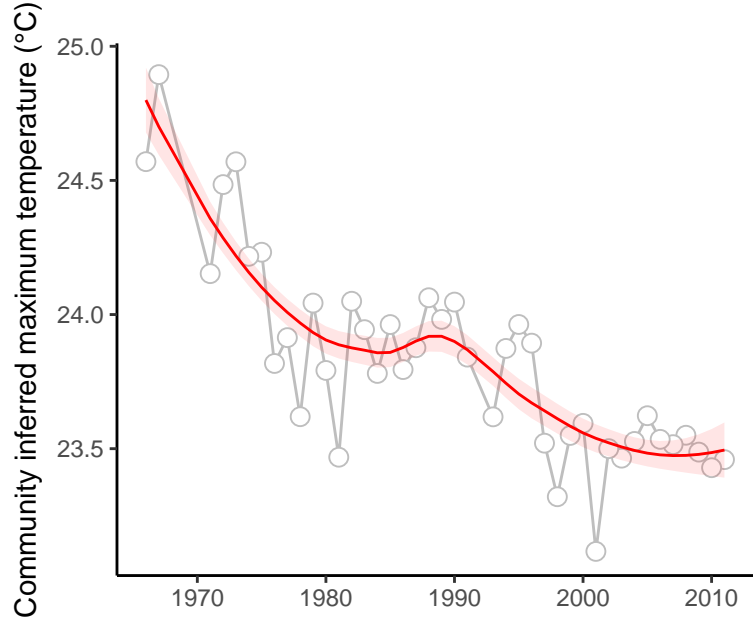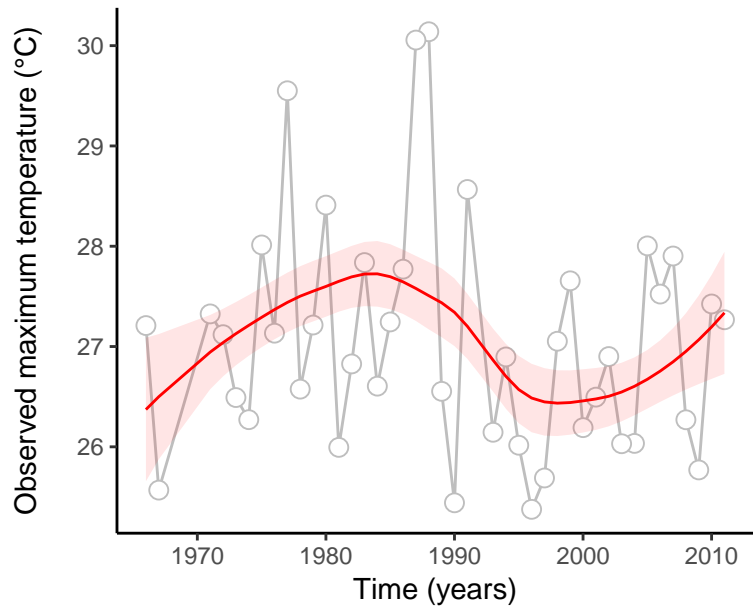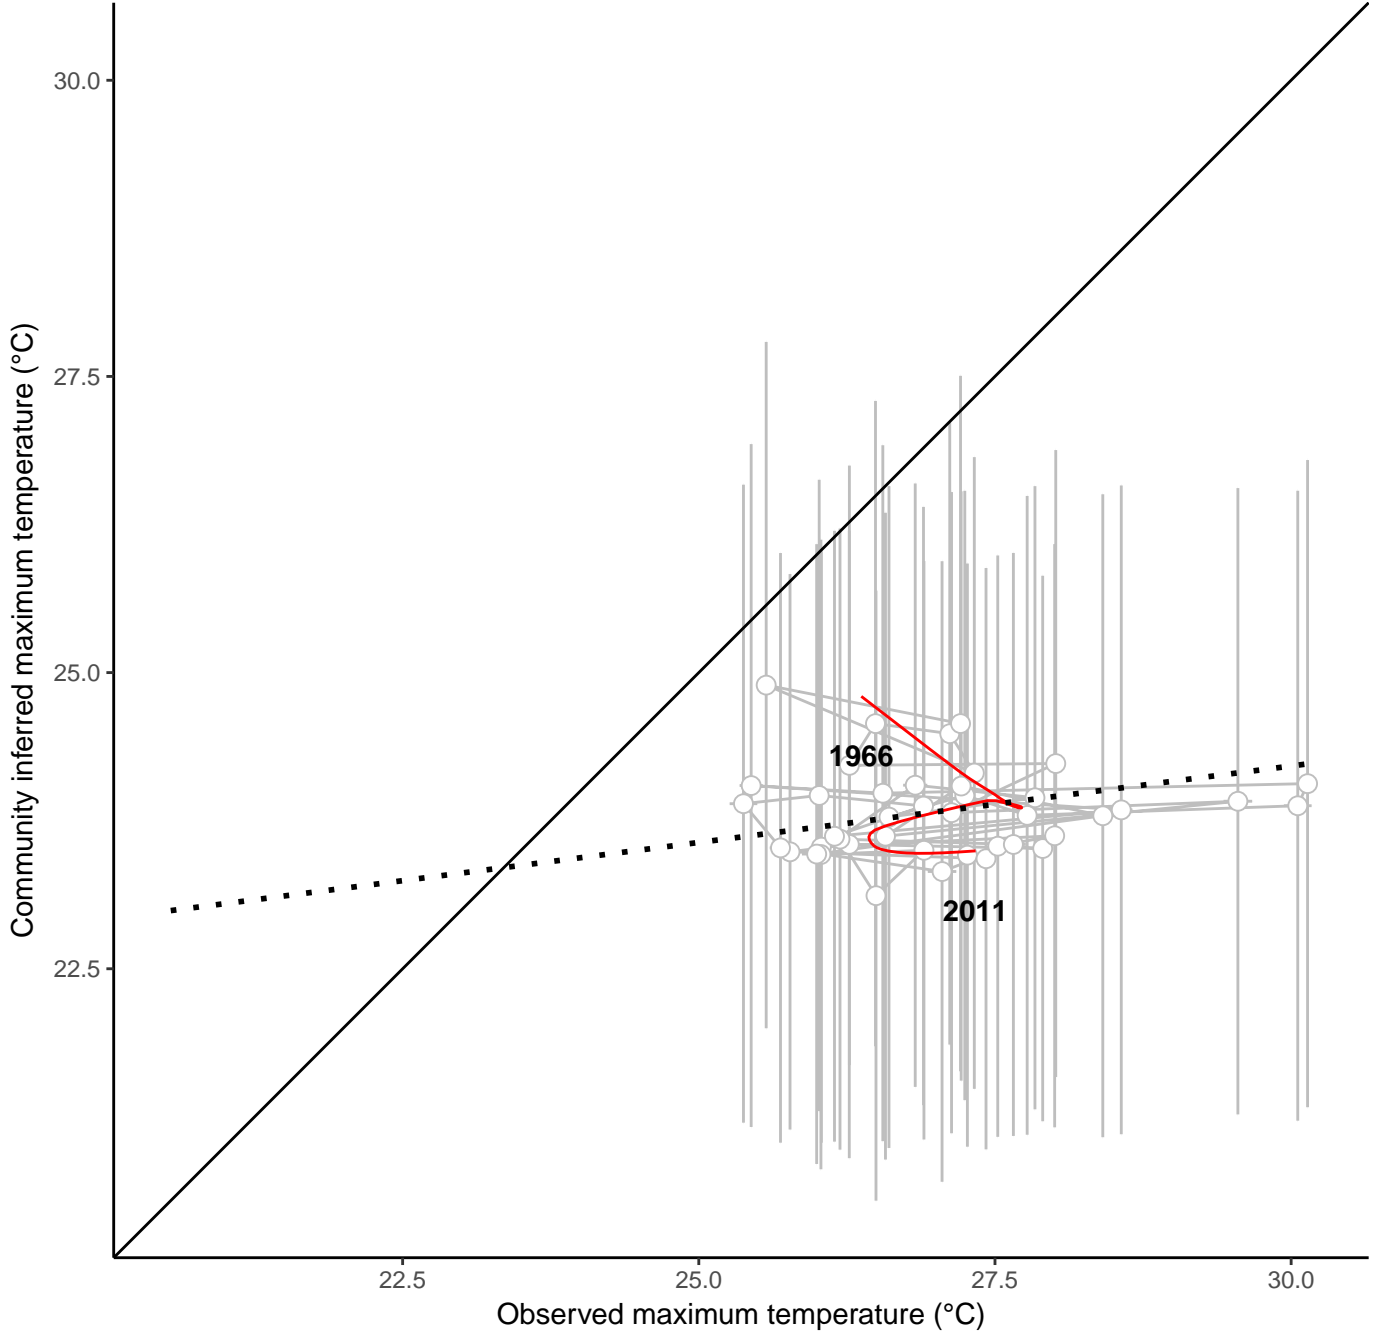



site : 840\_34\_5

absolute deviation = 2.35 | deviation change = 0.71 | maximum state number = 1

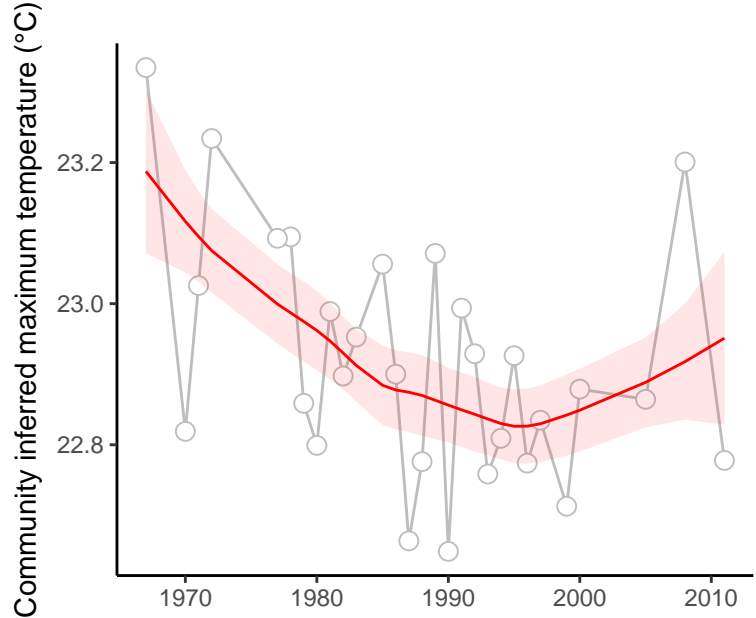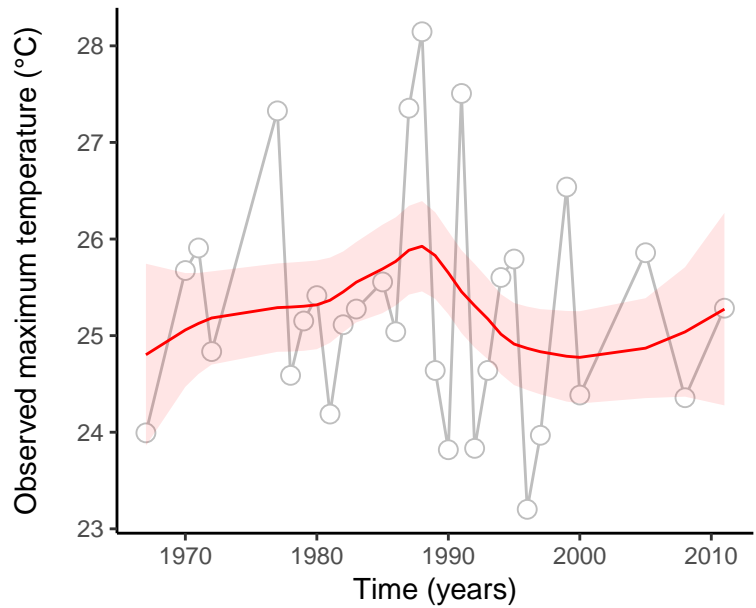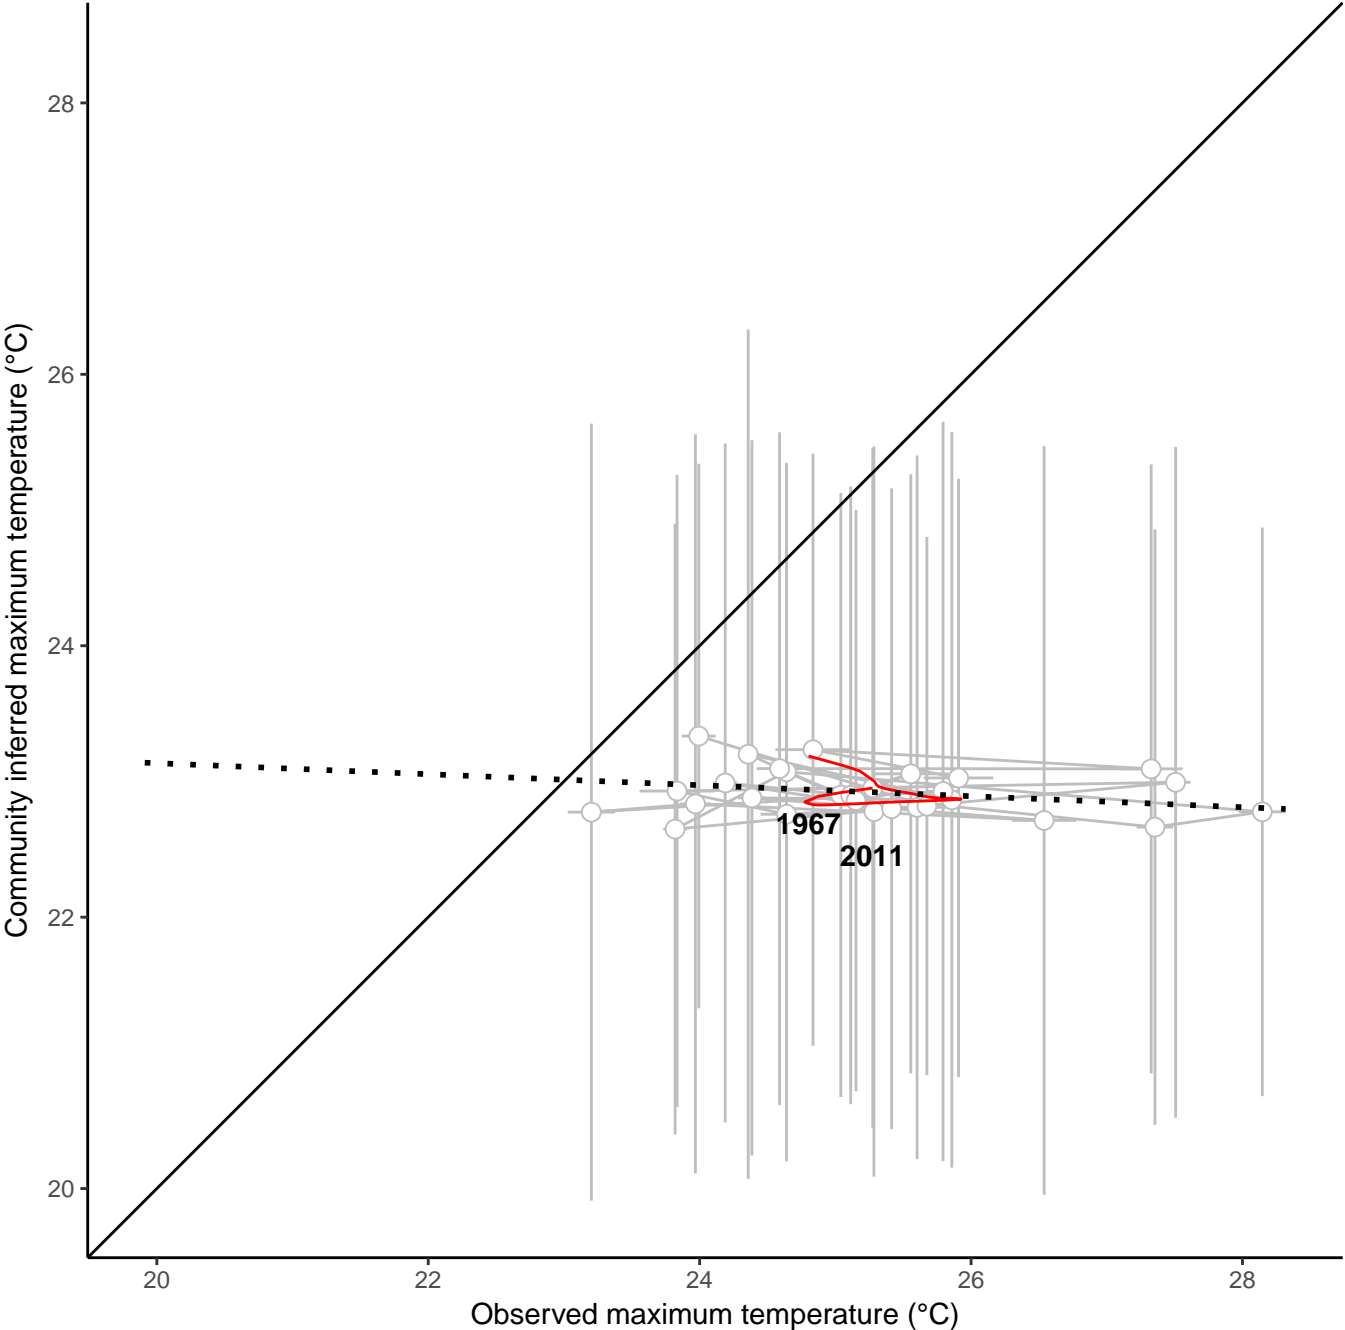

site : 840\_34\_60

absolute deviation = 3.72 | deviation change = 0.48 | maximum state number = 1

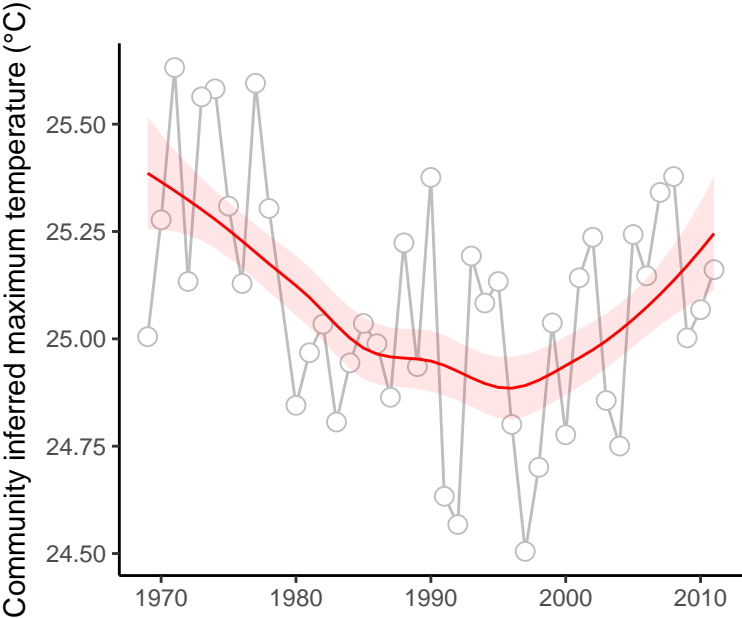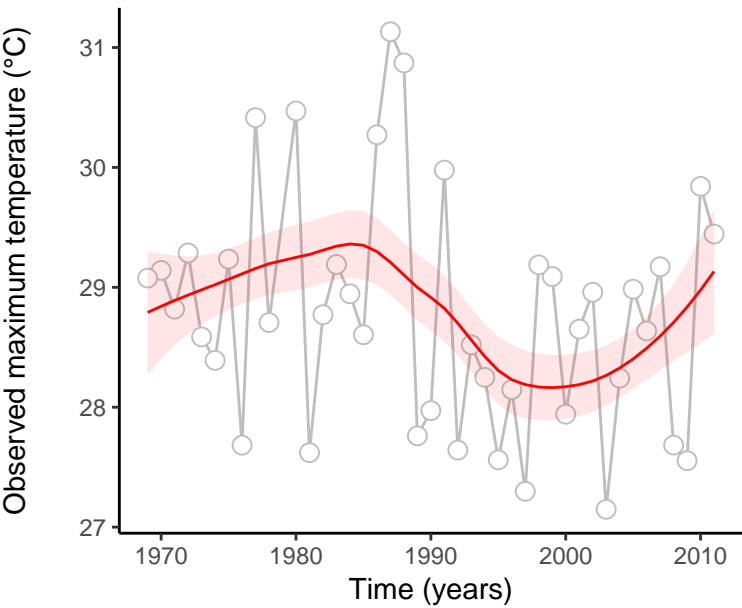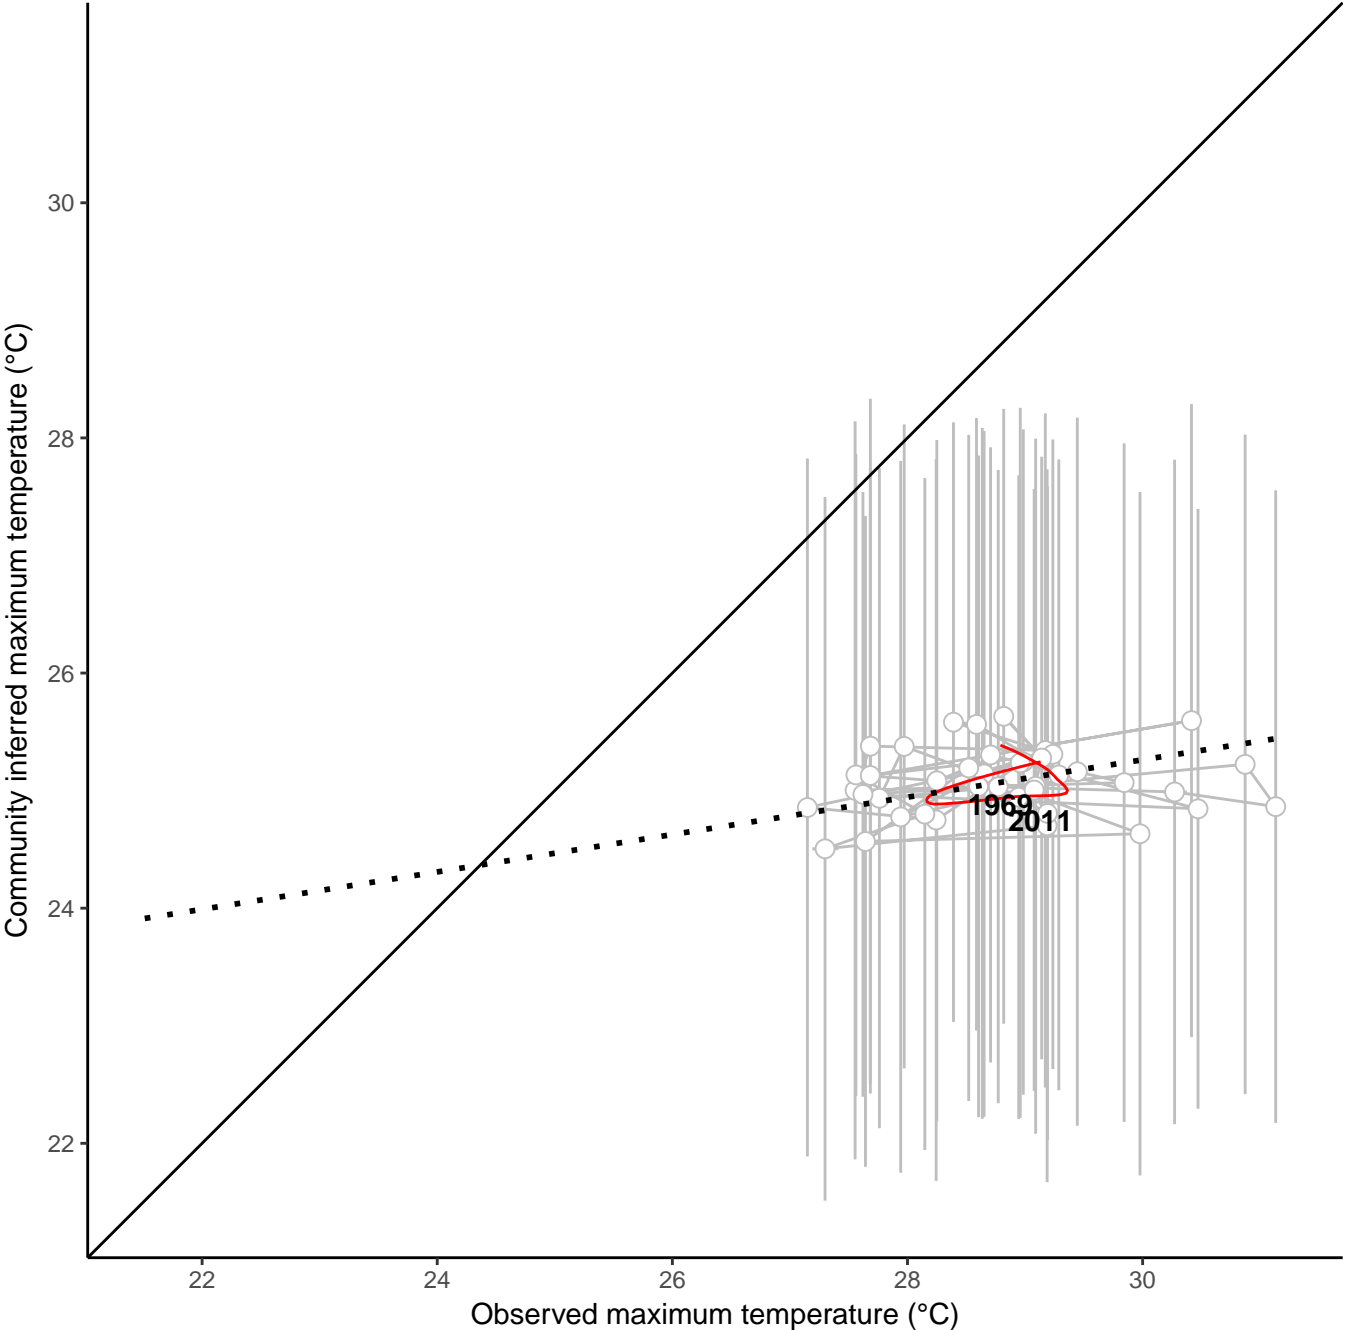

site : 840\_46\_11

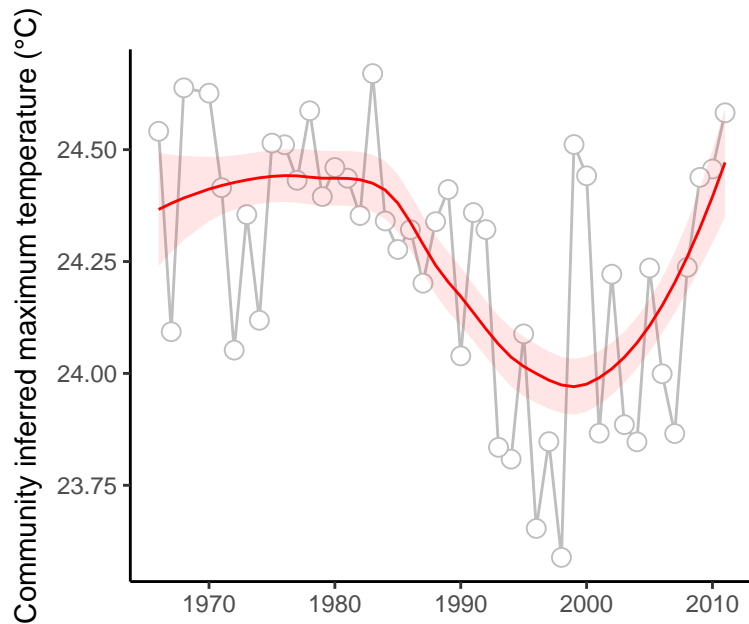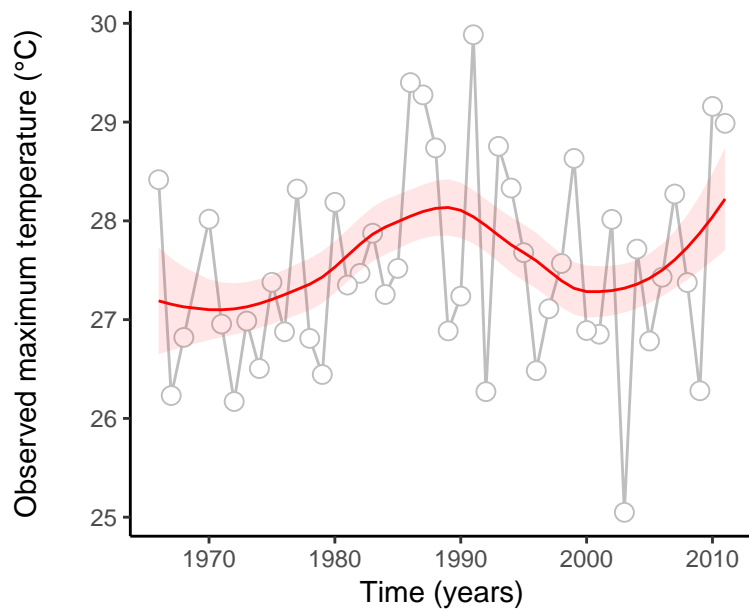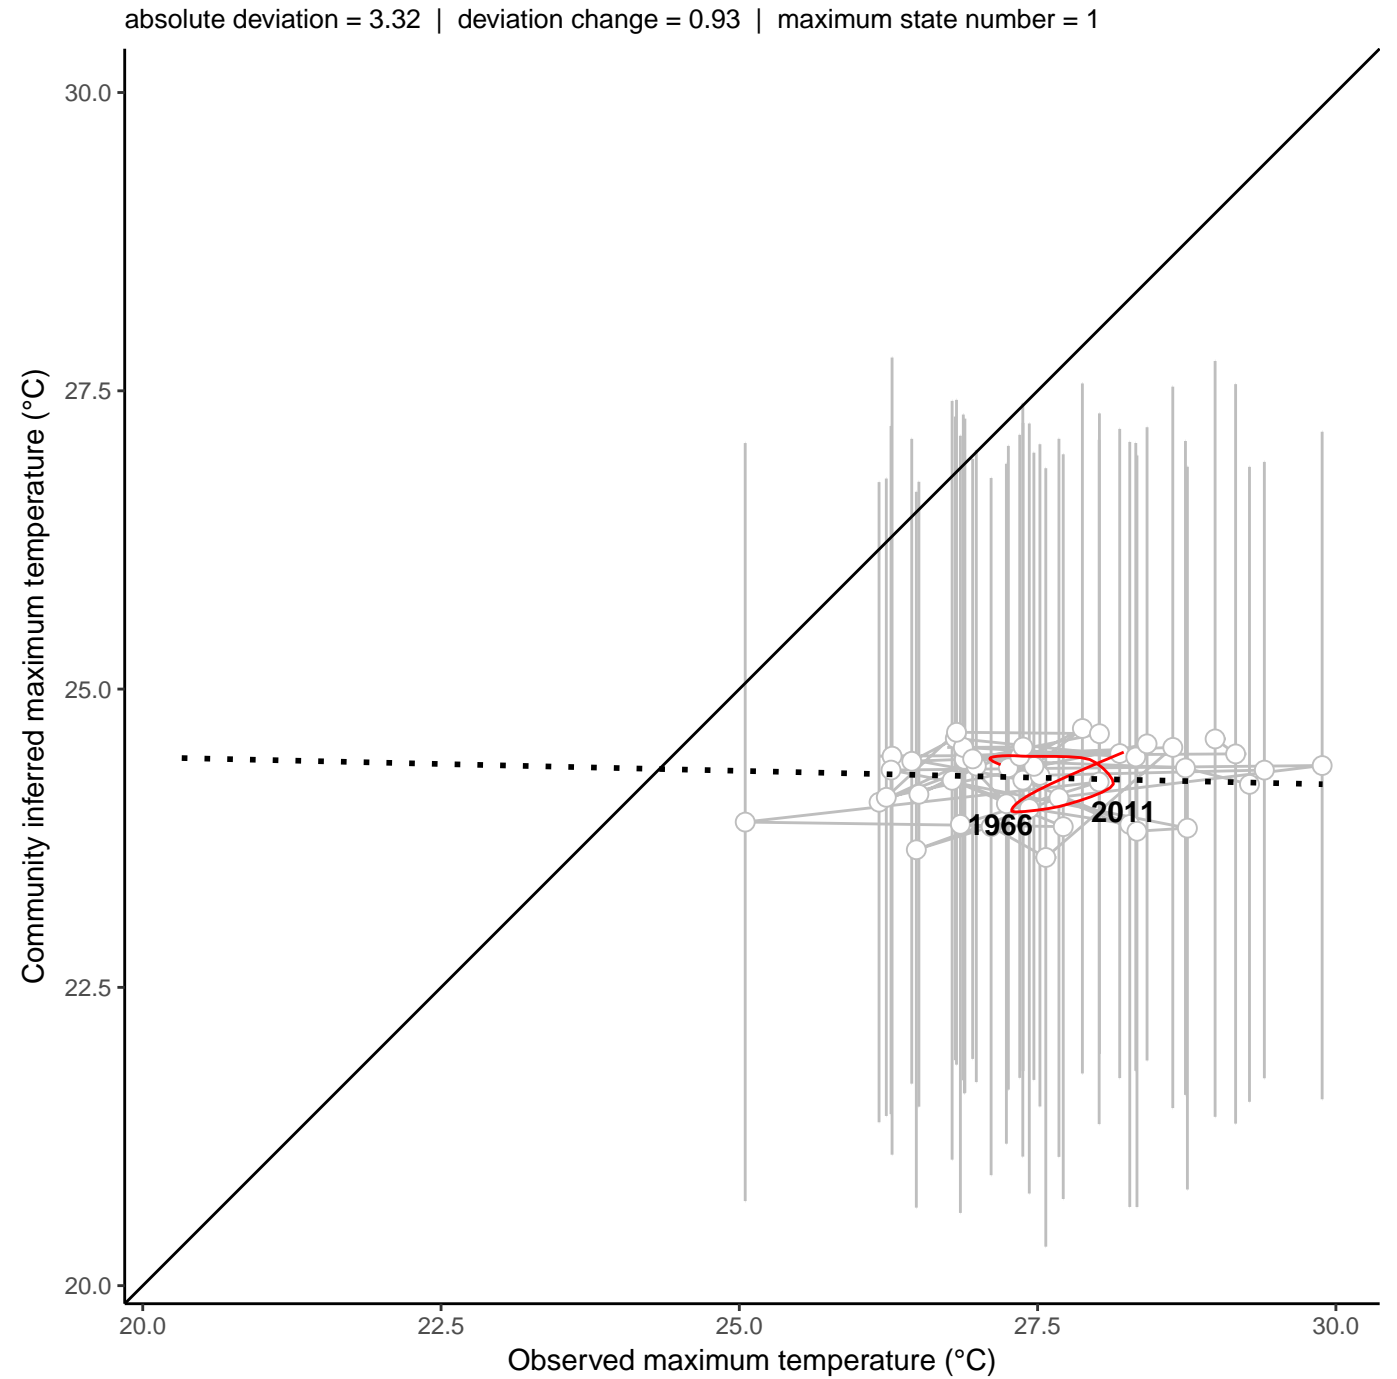

site : 840\_52\_13

absolute deviation = 2.9 | deviation change = 1.19 | maximum state number = 1

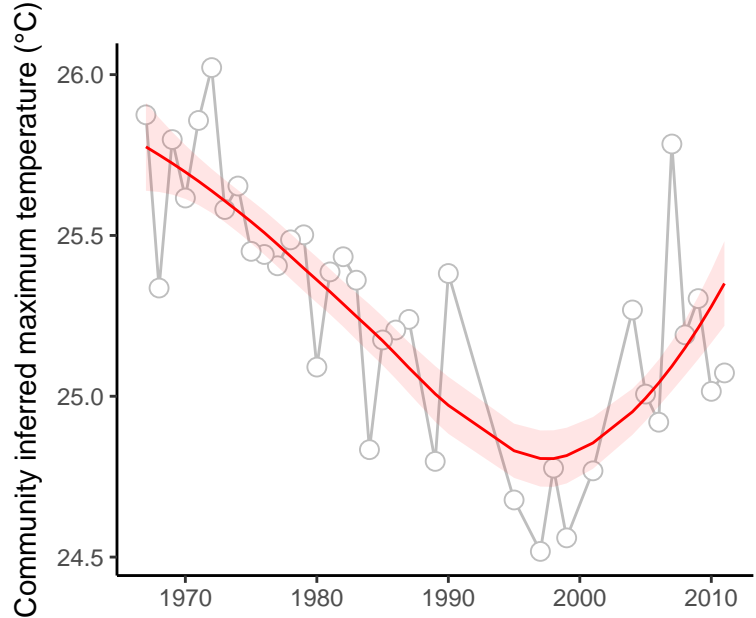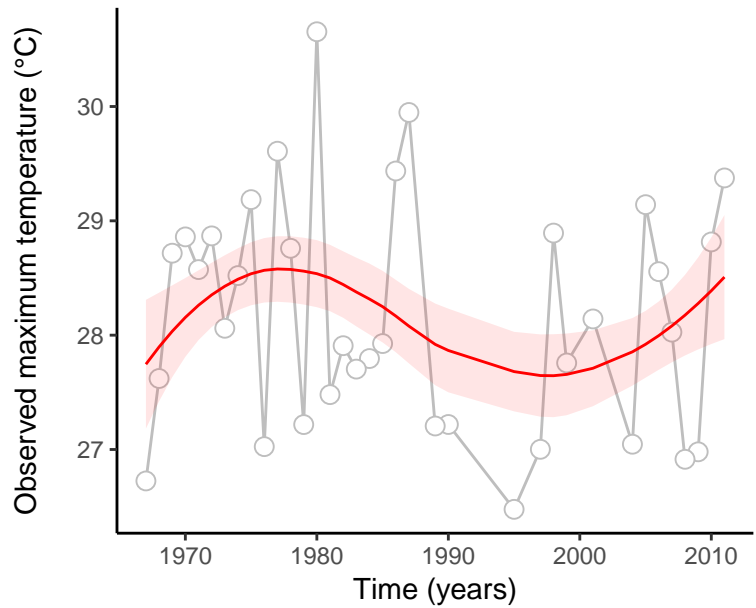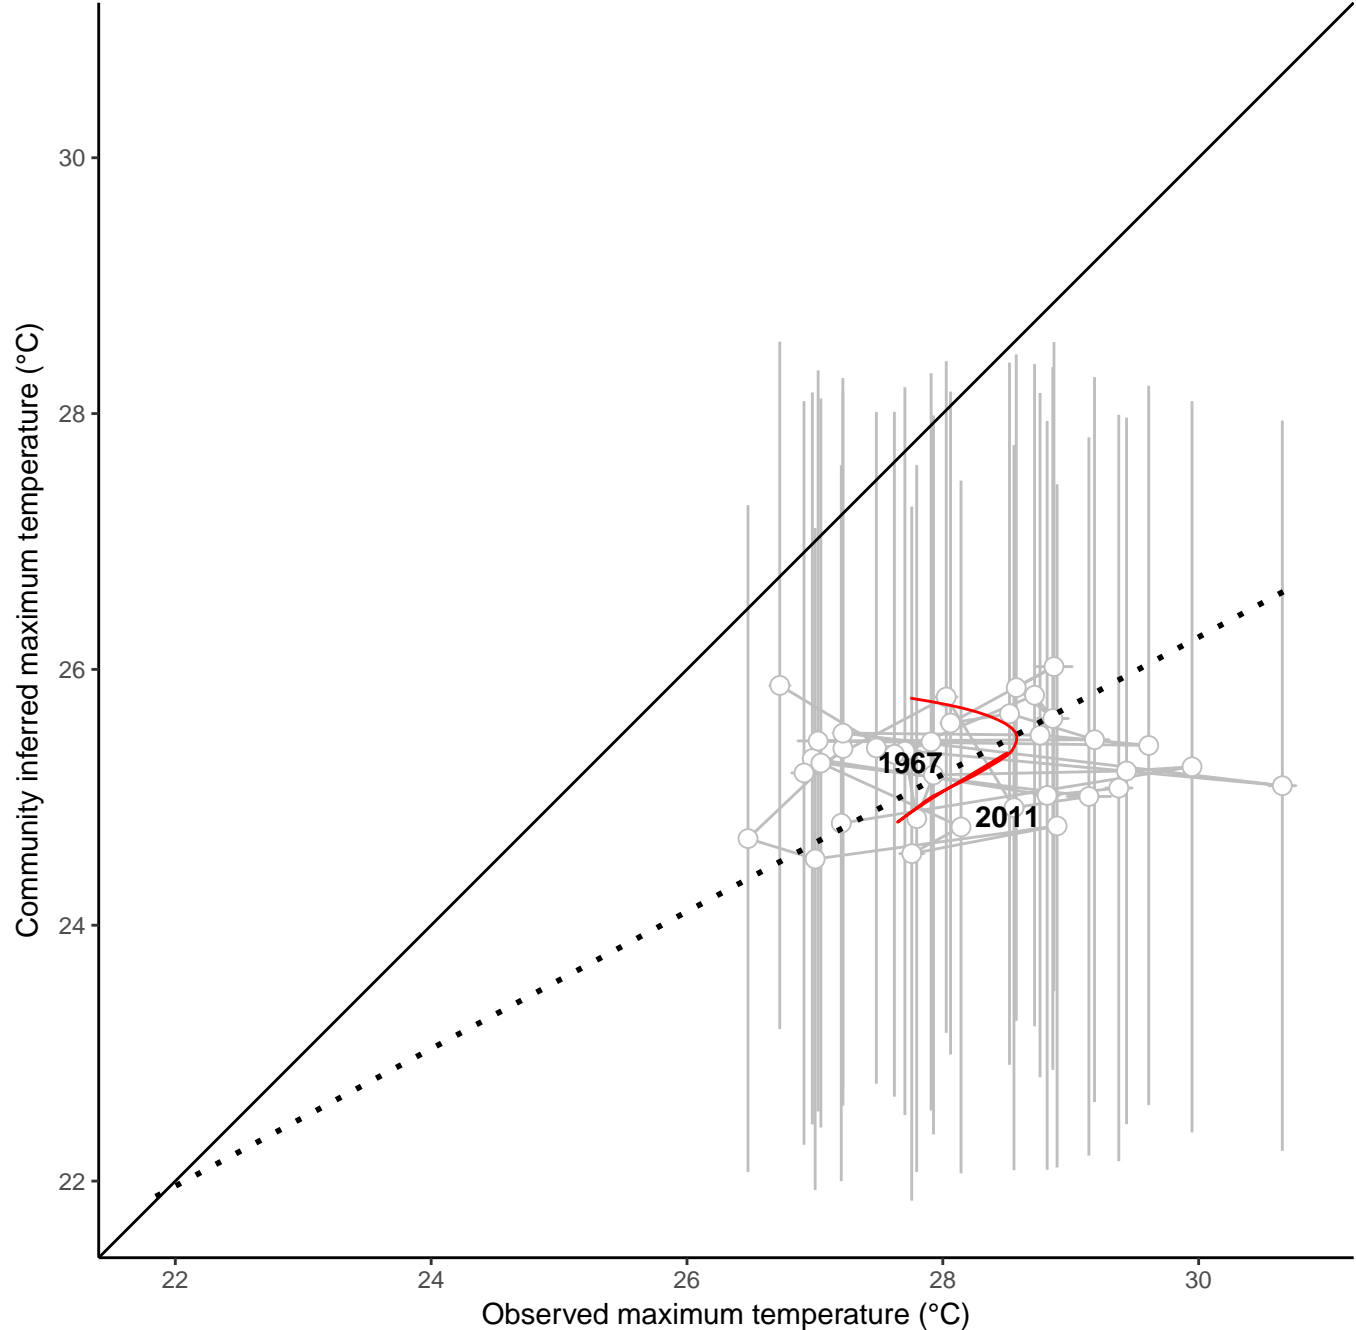

site : 840\_66\_49

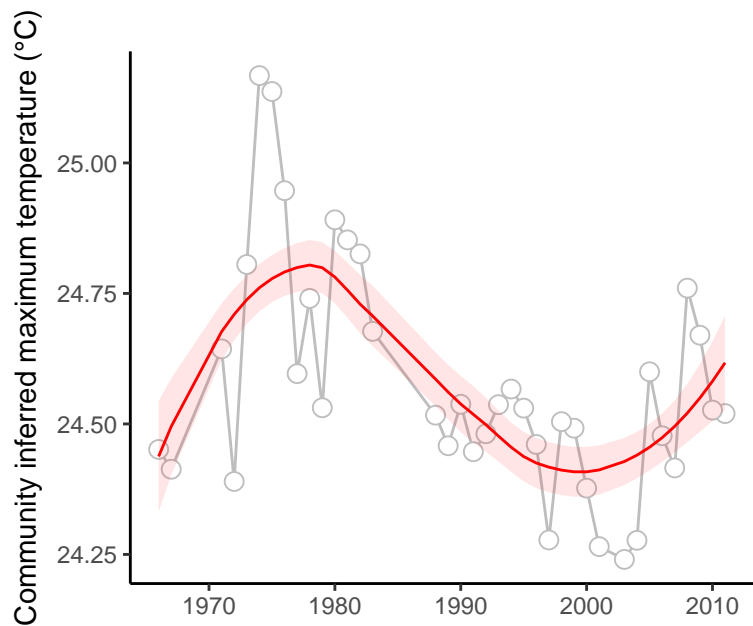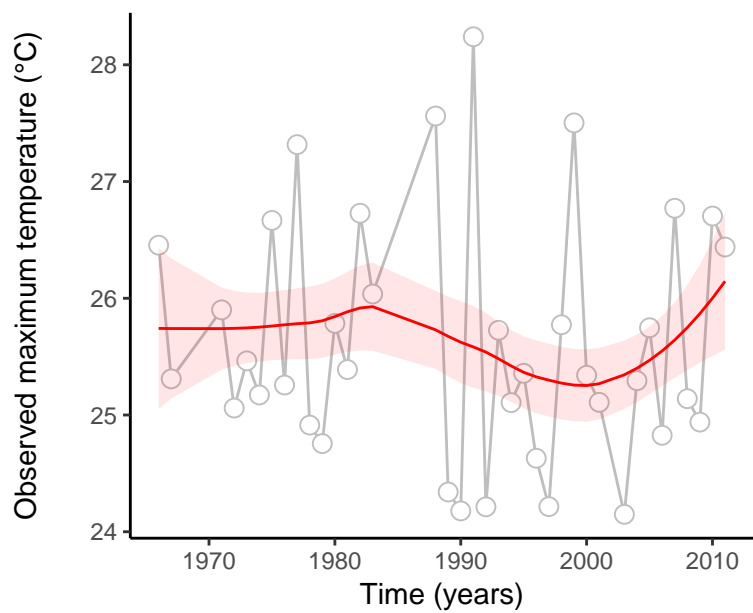

absolute deviation = 1.06 | deviation change = 0.22 | maximum state number = 1

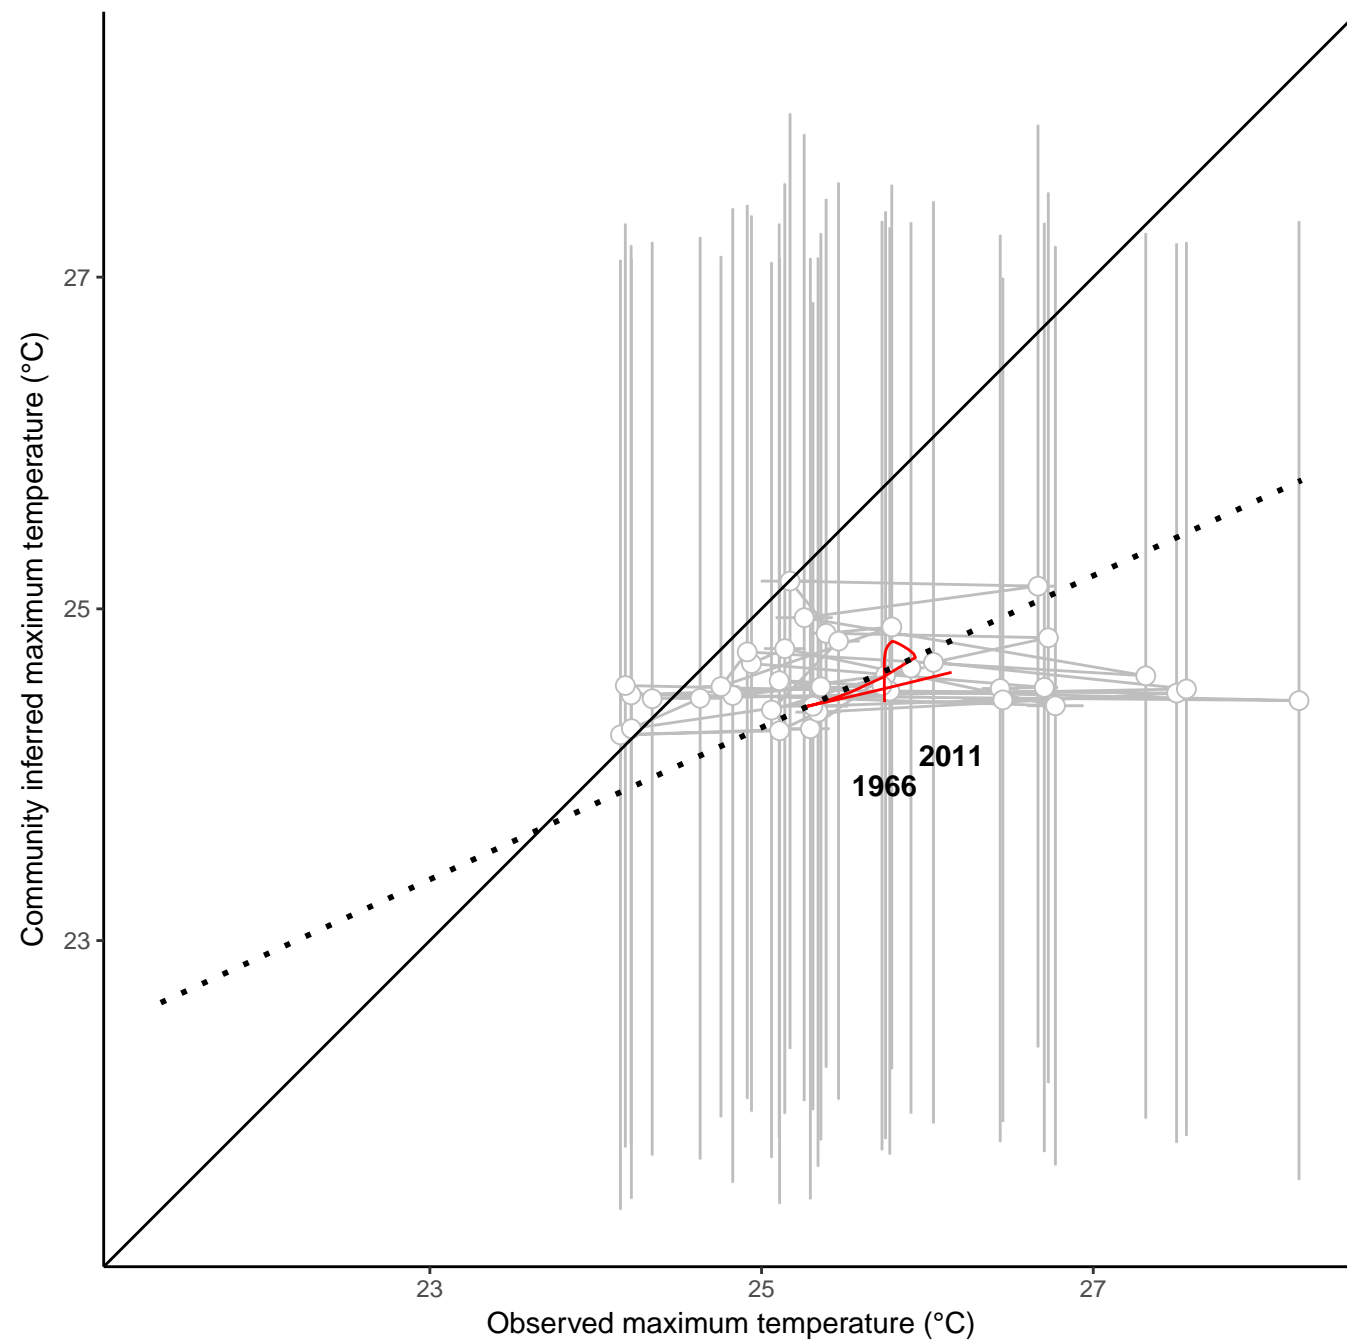

site : 840\_72\_90

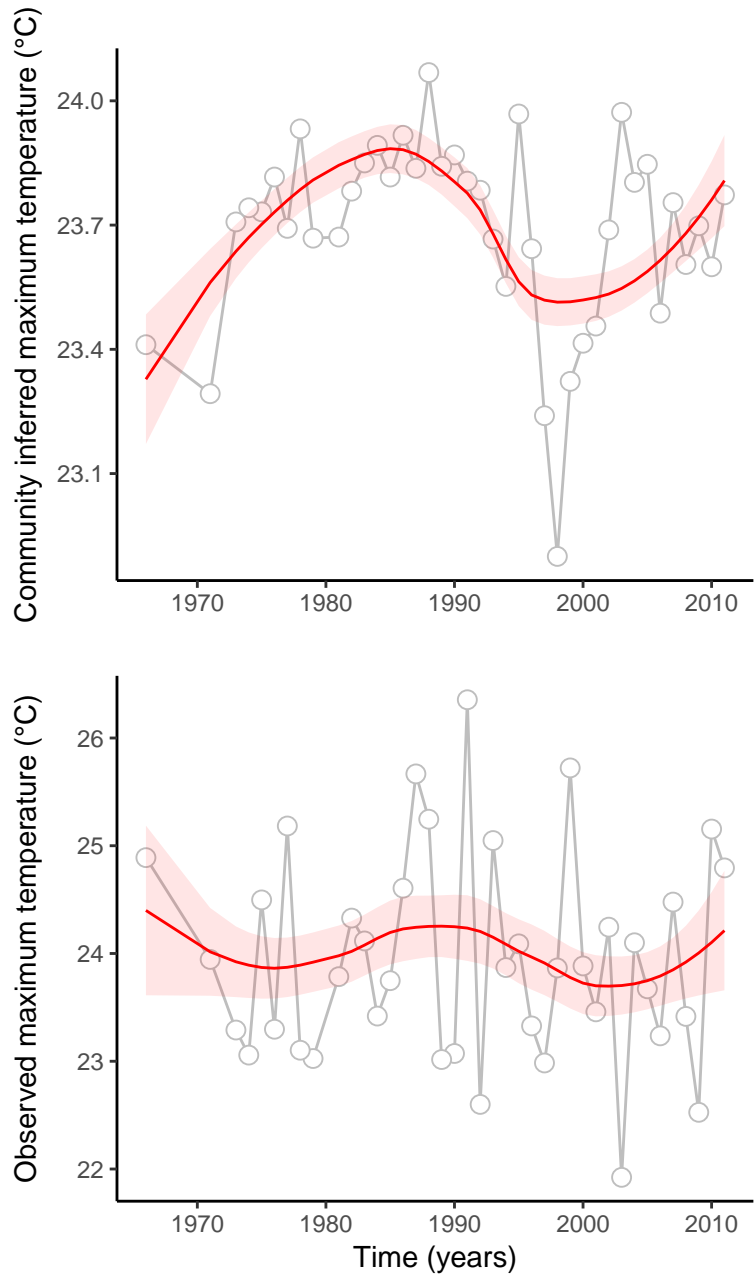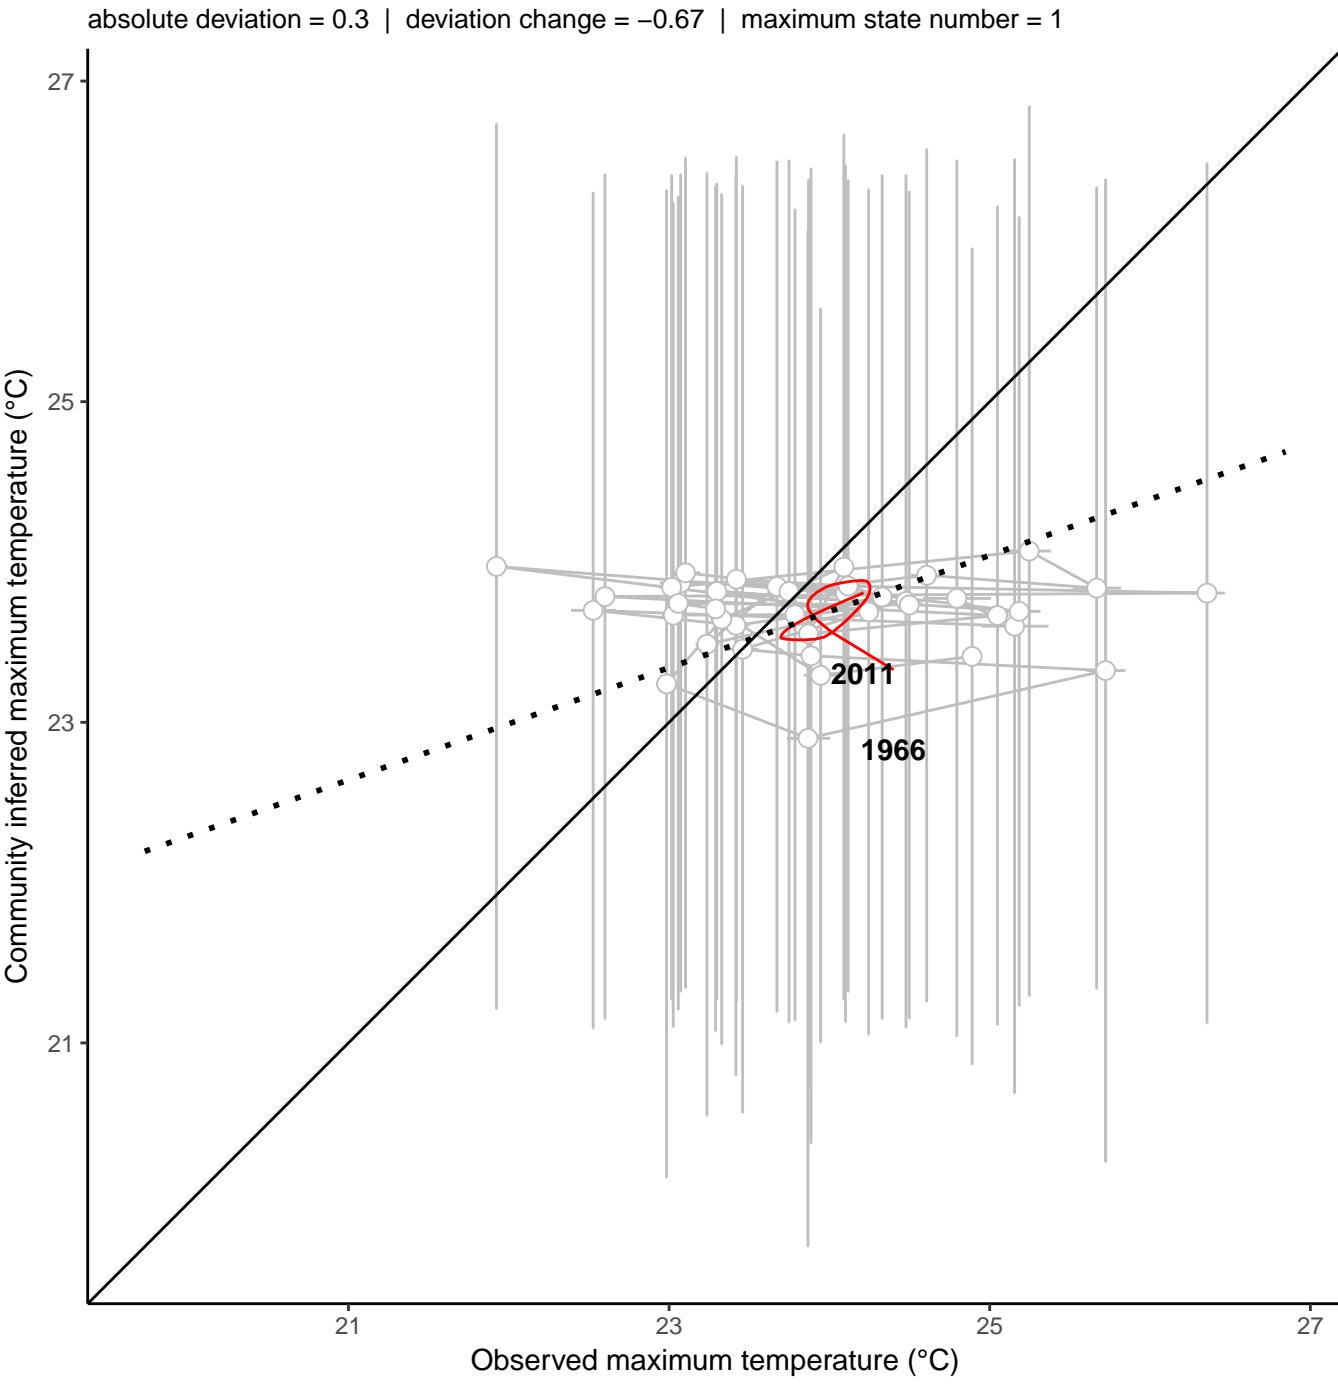

site : 840\_80\_18

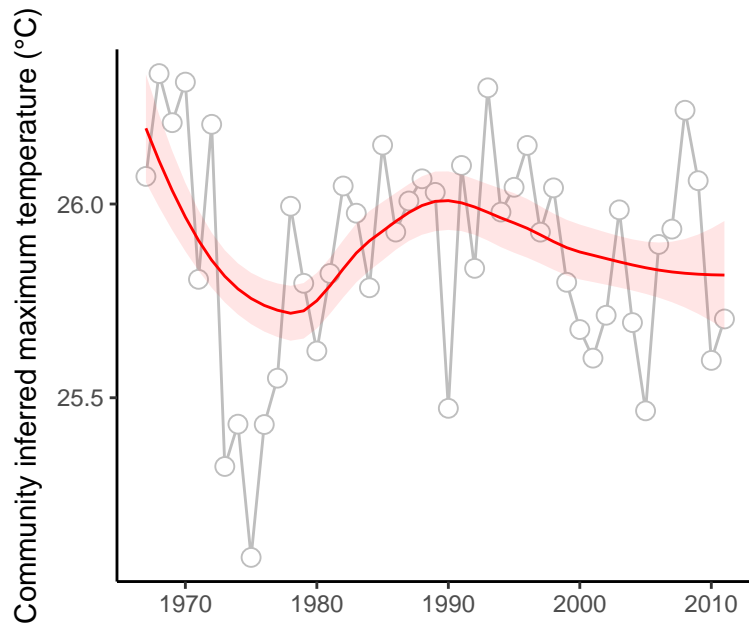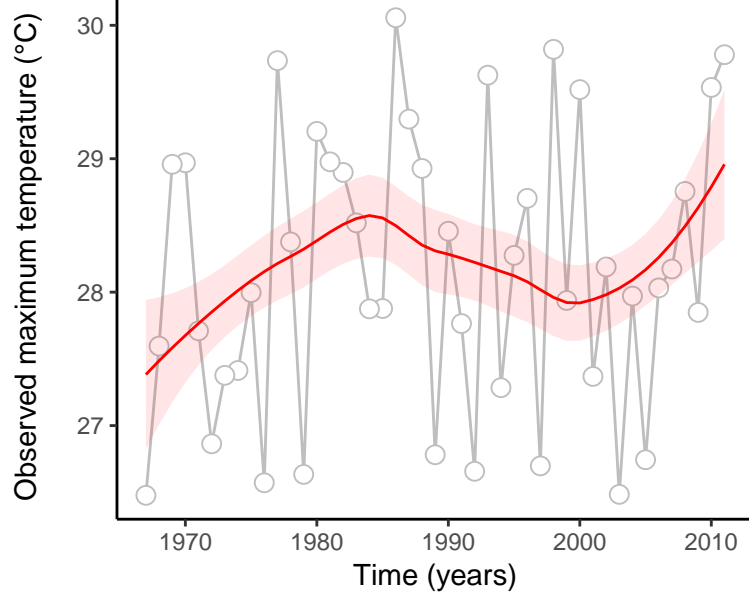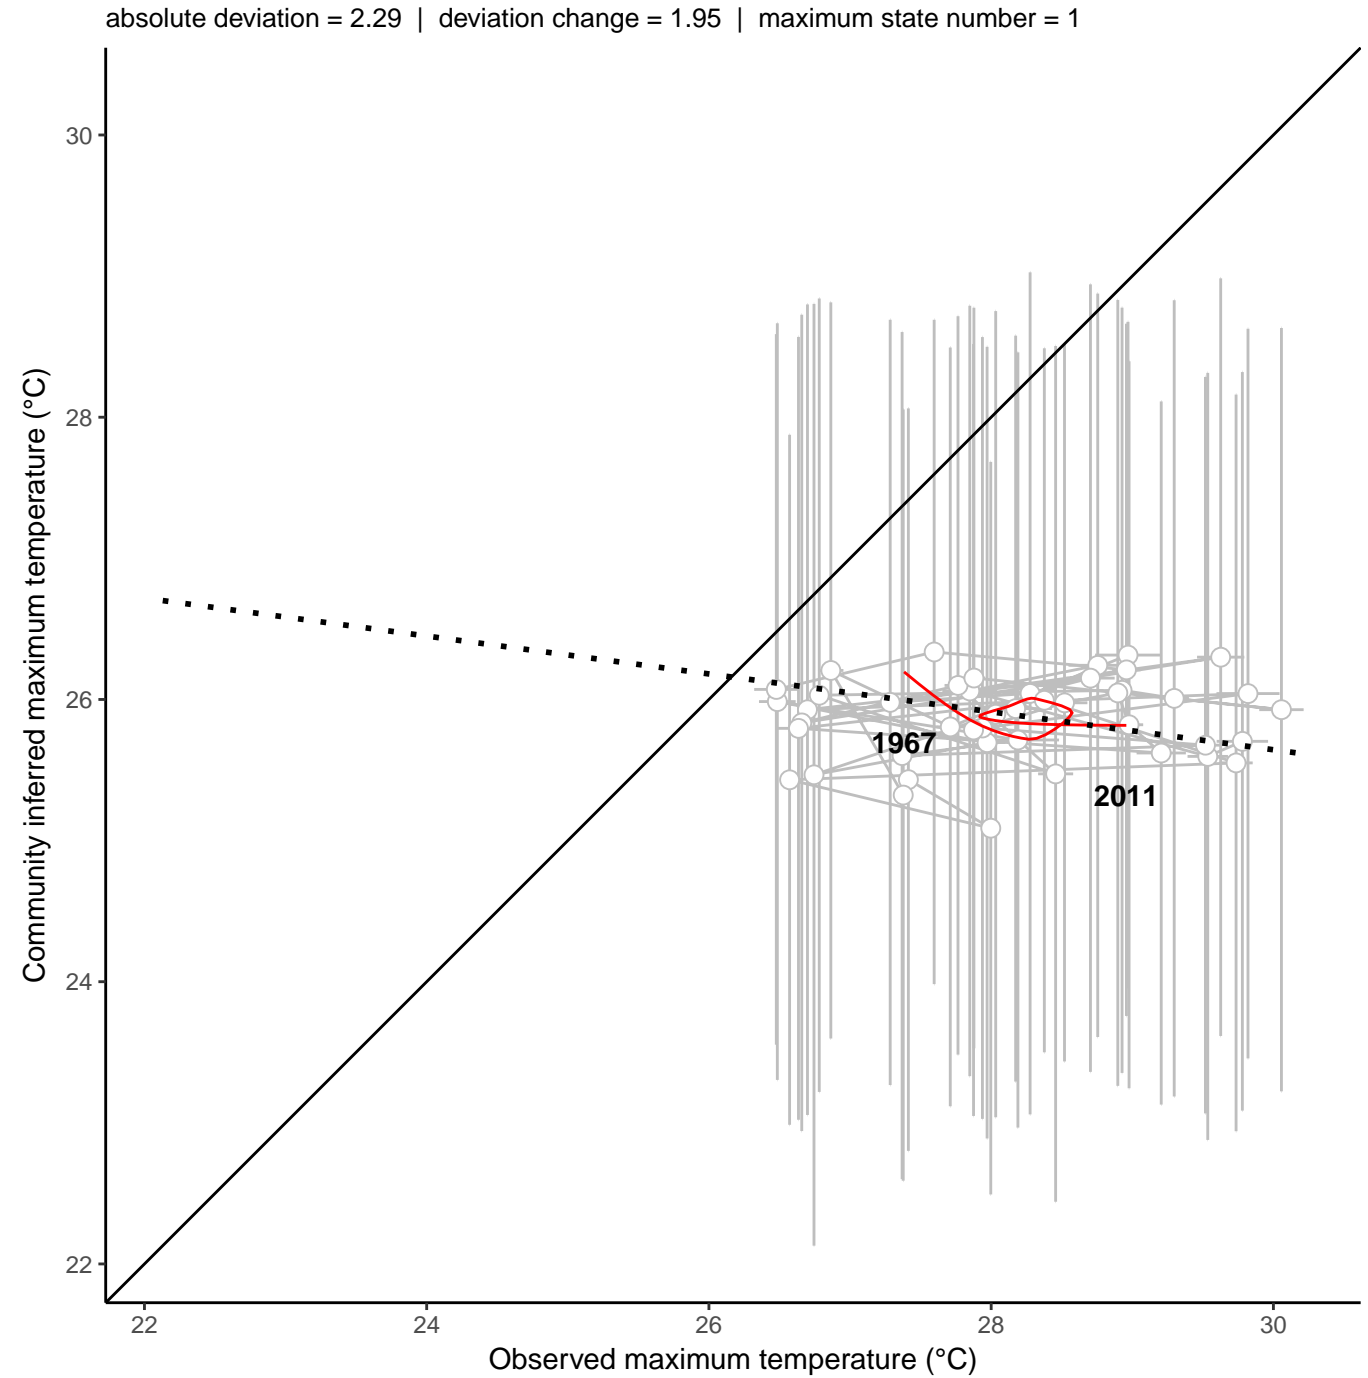

site : 840\_83\_21

absolute deviation = 4.44 | deviation change = 0.24 | maximum state number = 1

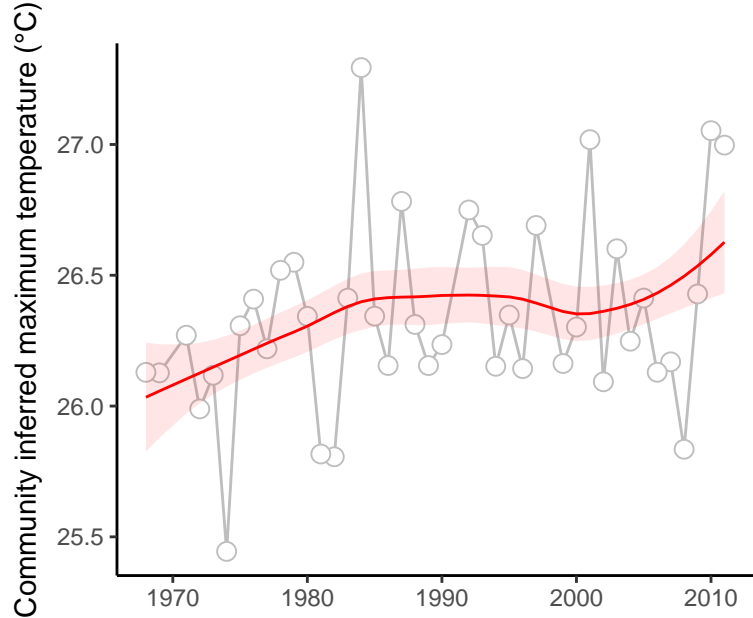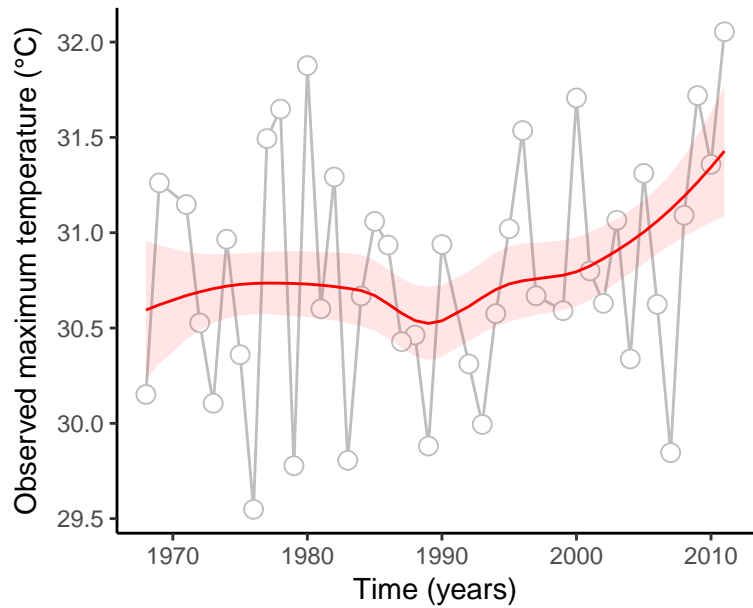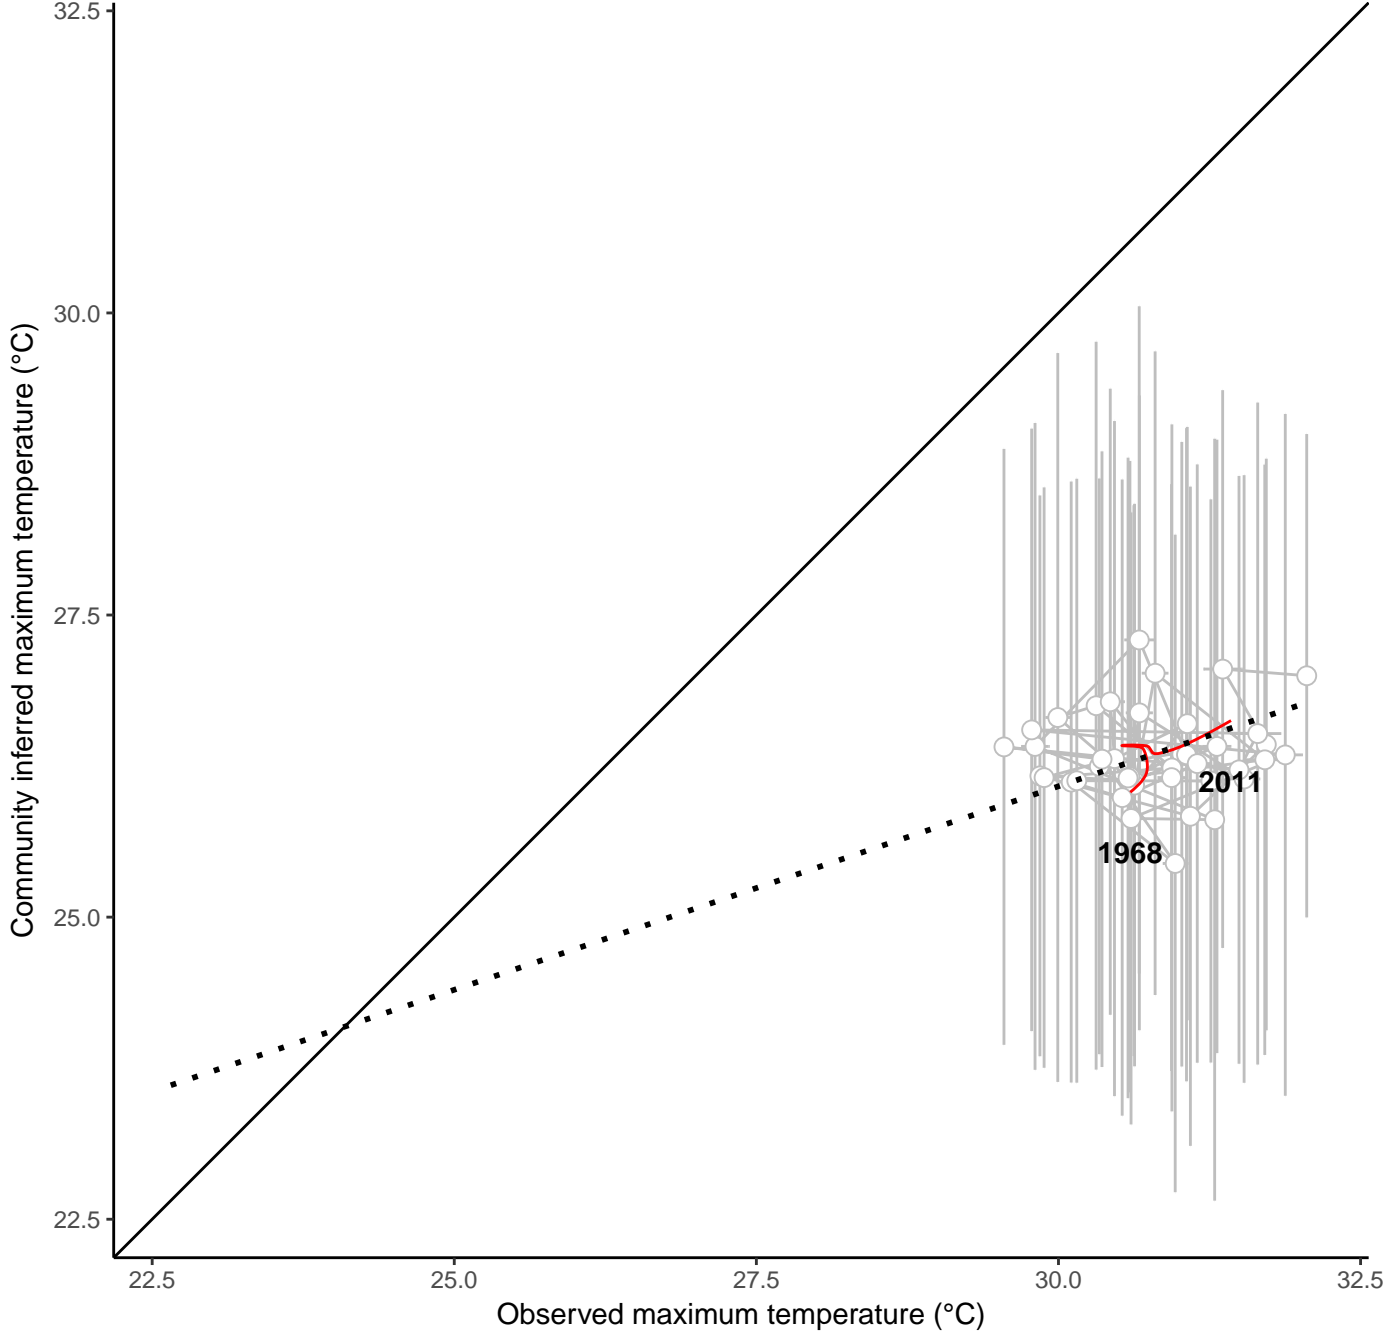



site : 840\_88\_20

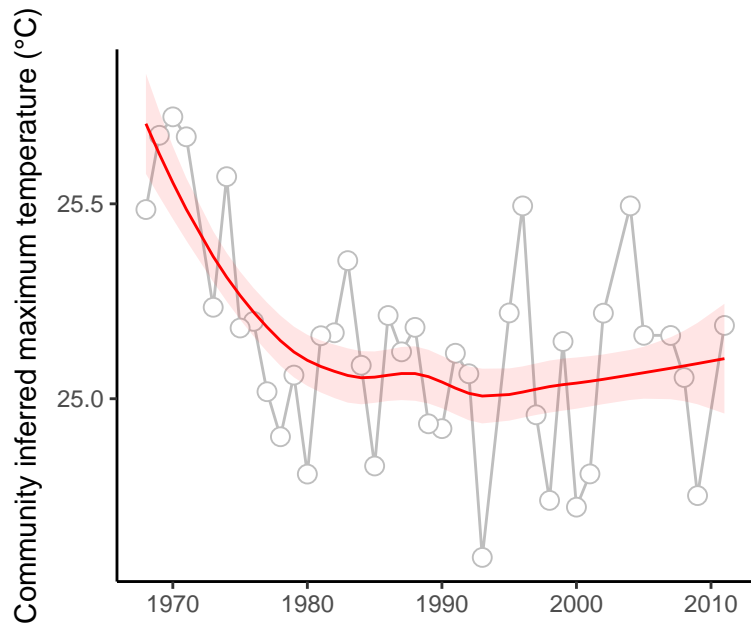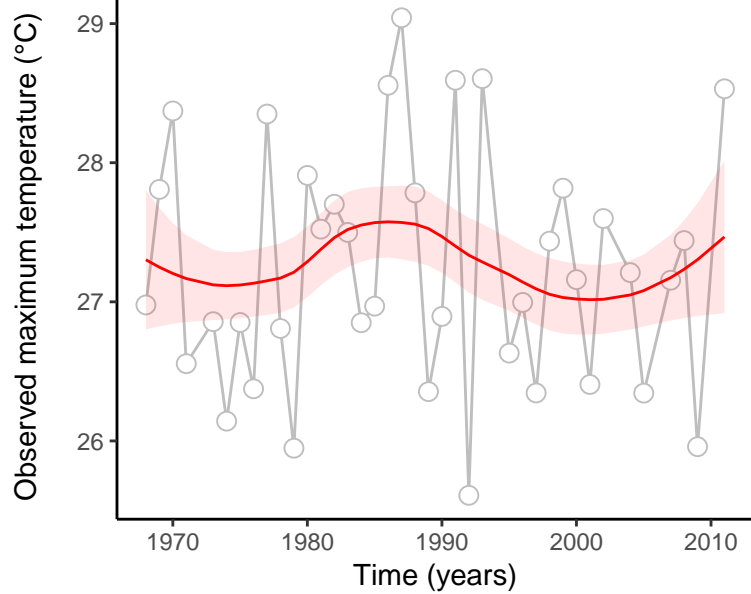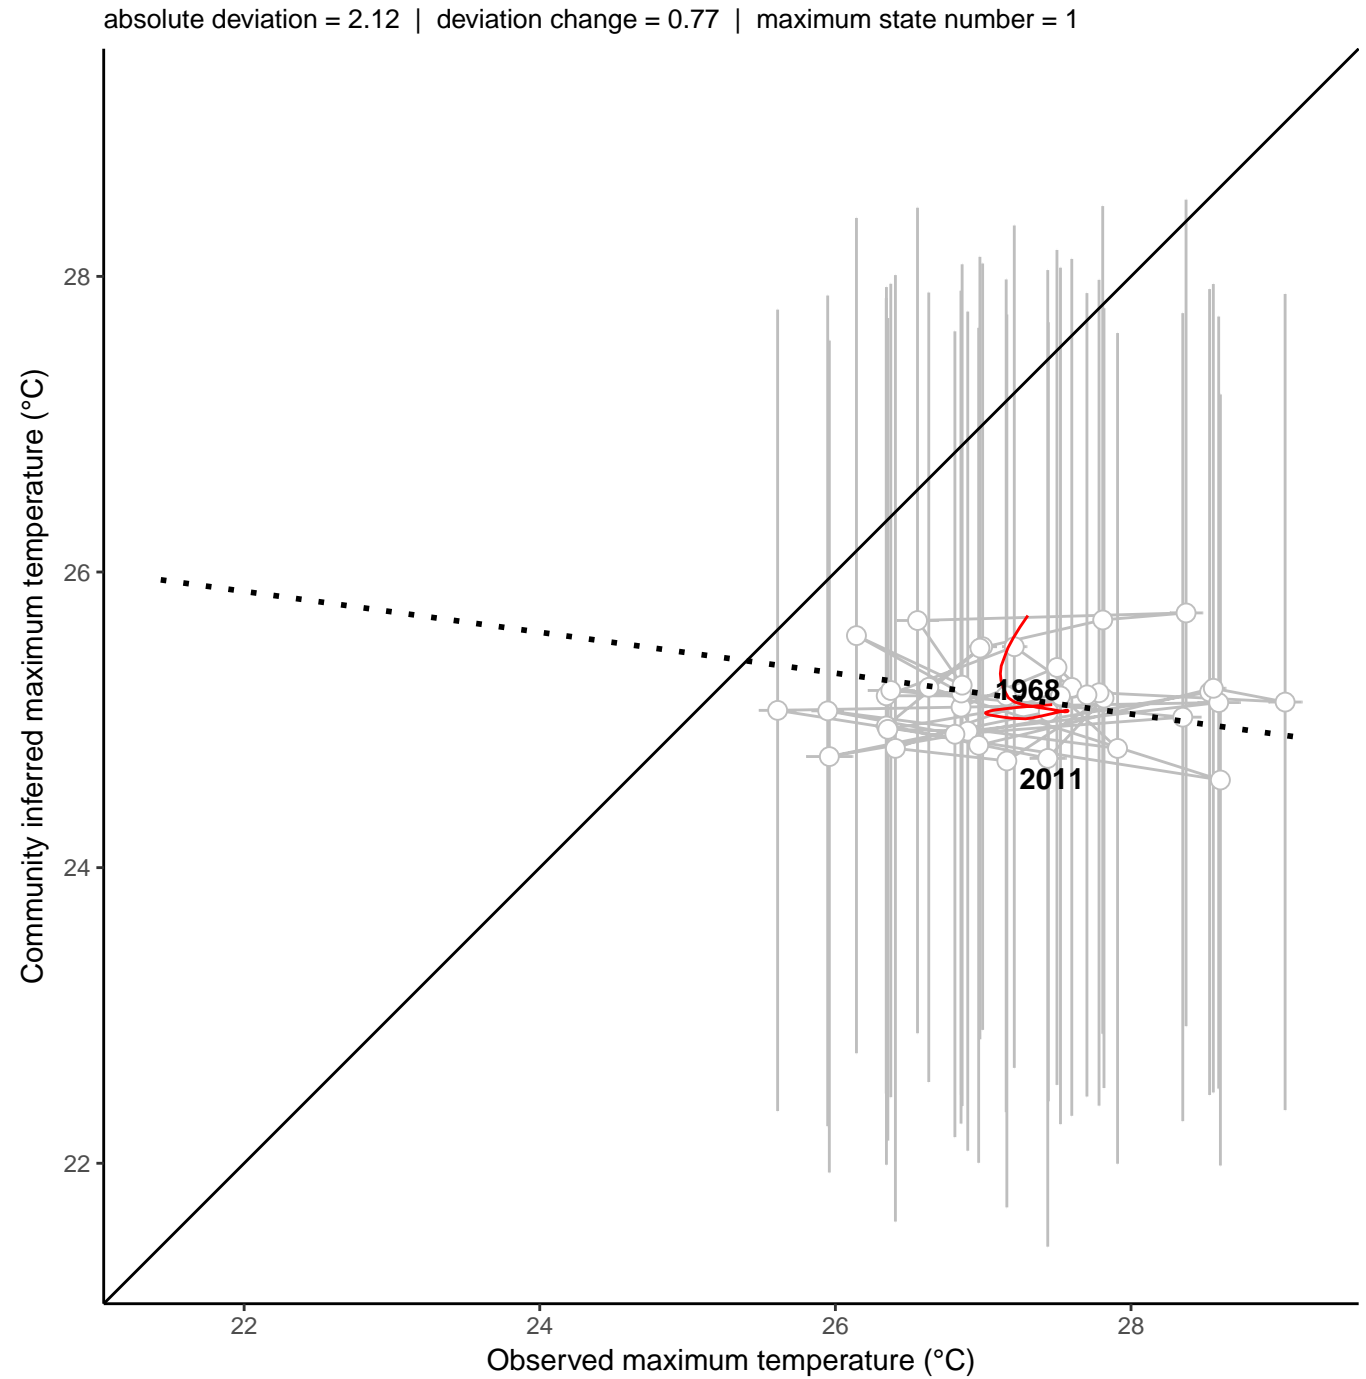

site : 840\_91\_16

absolute deviation = 0.85 | deviation change = 0.41 | maximum state number = 1

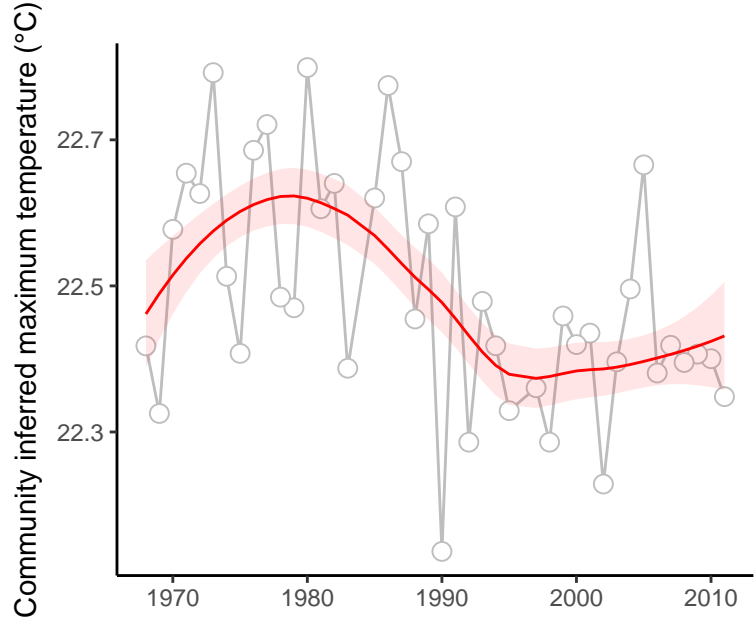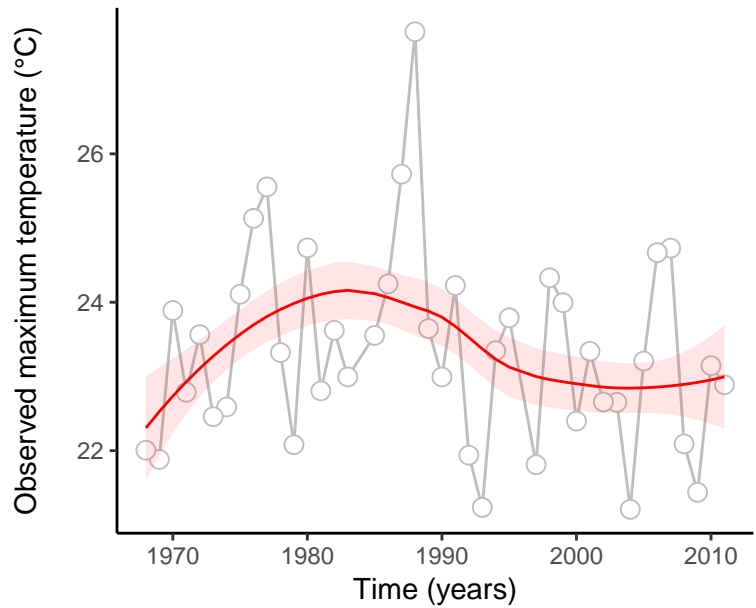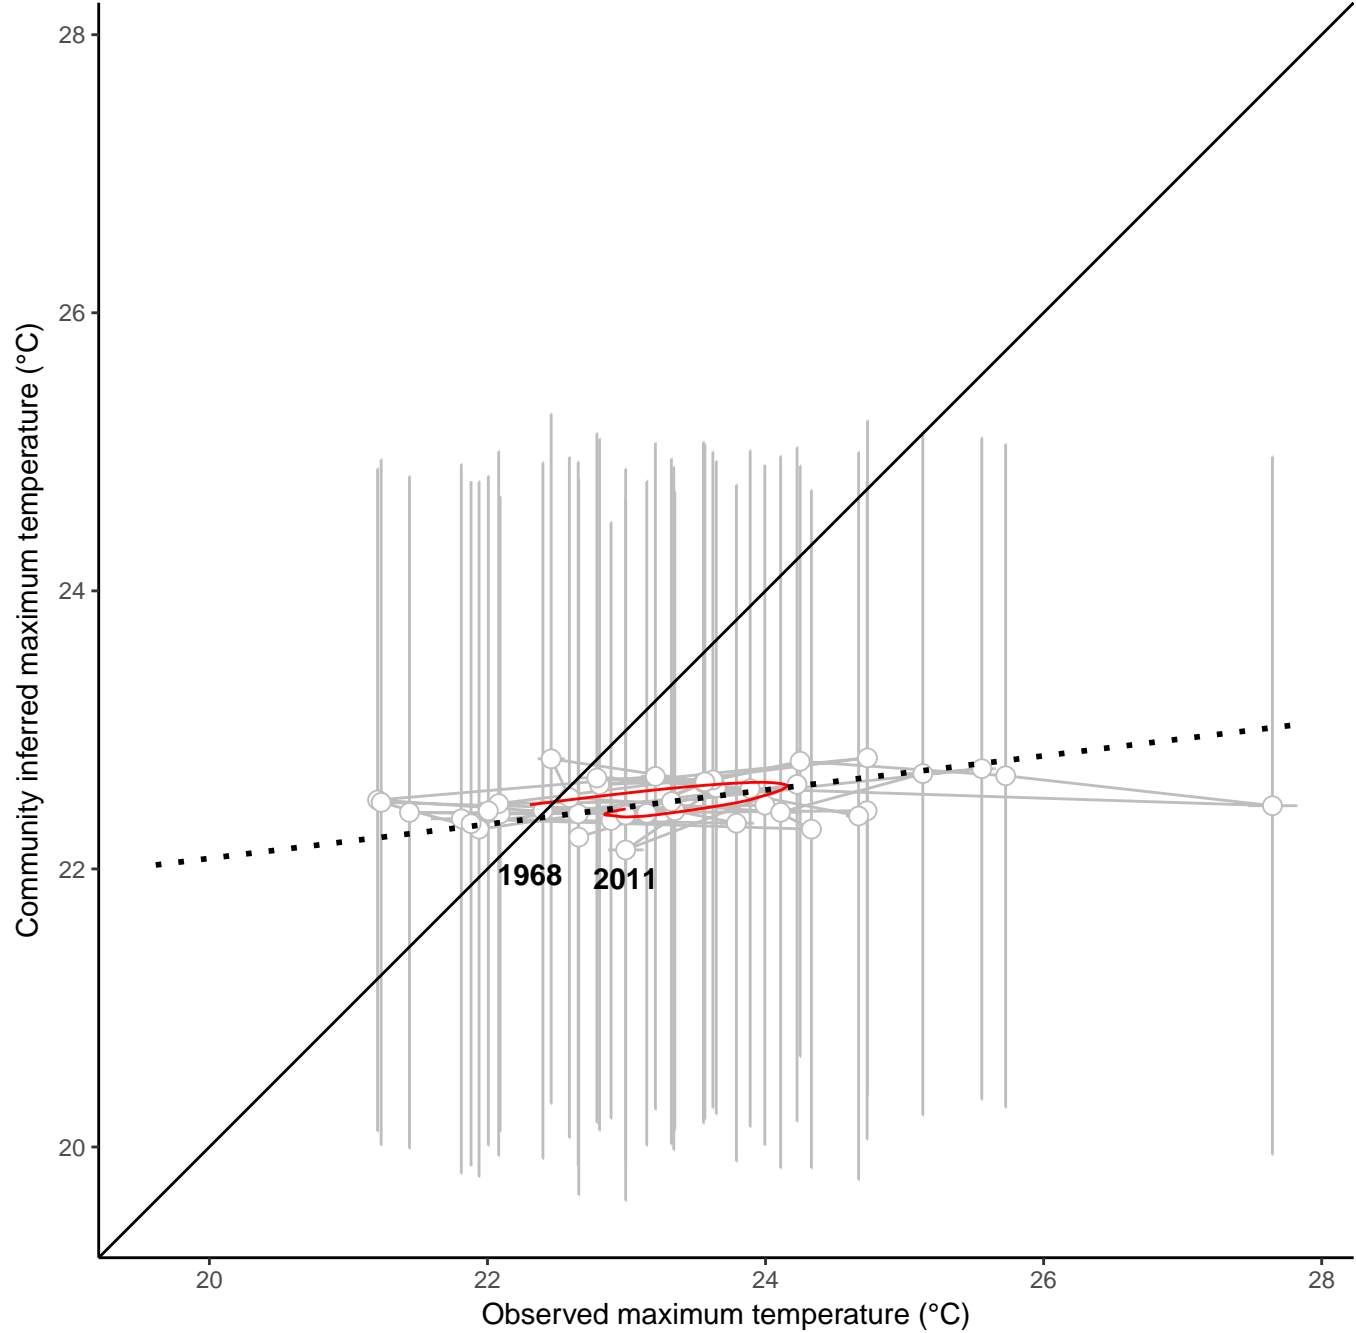

site : 840\_91\_49

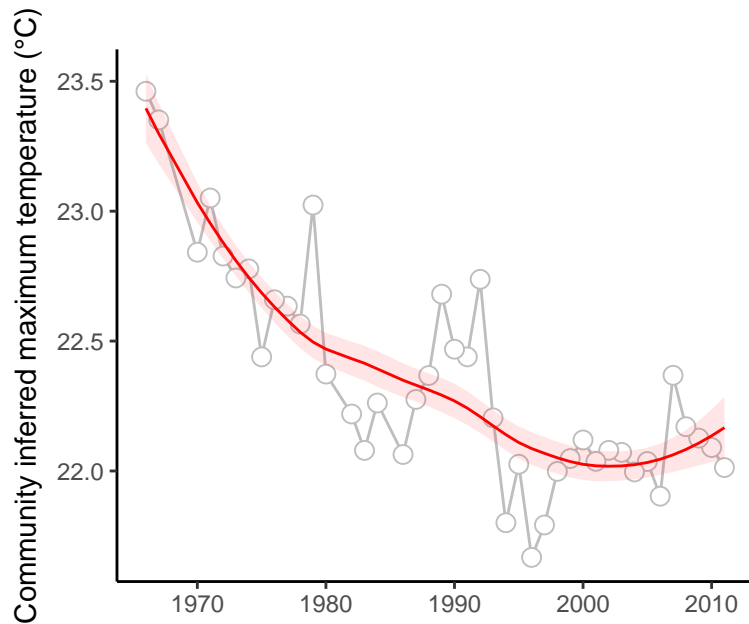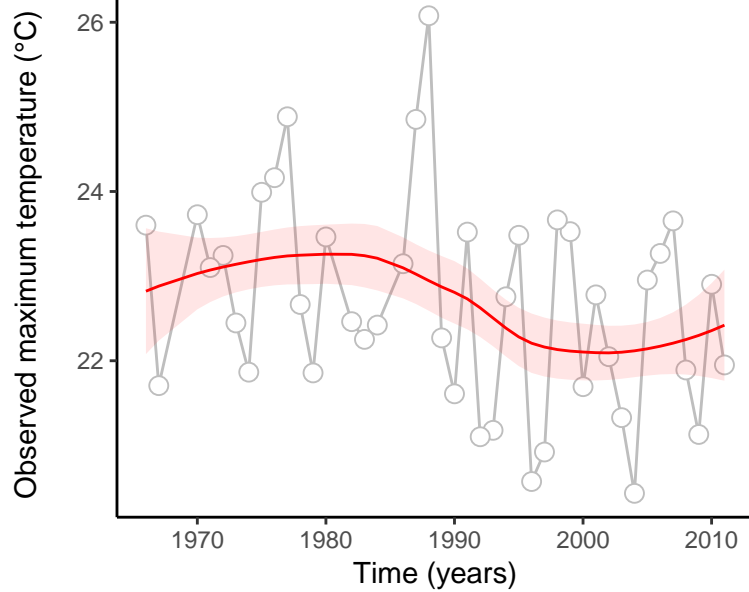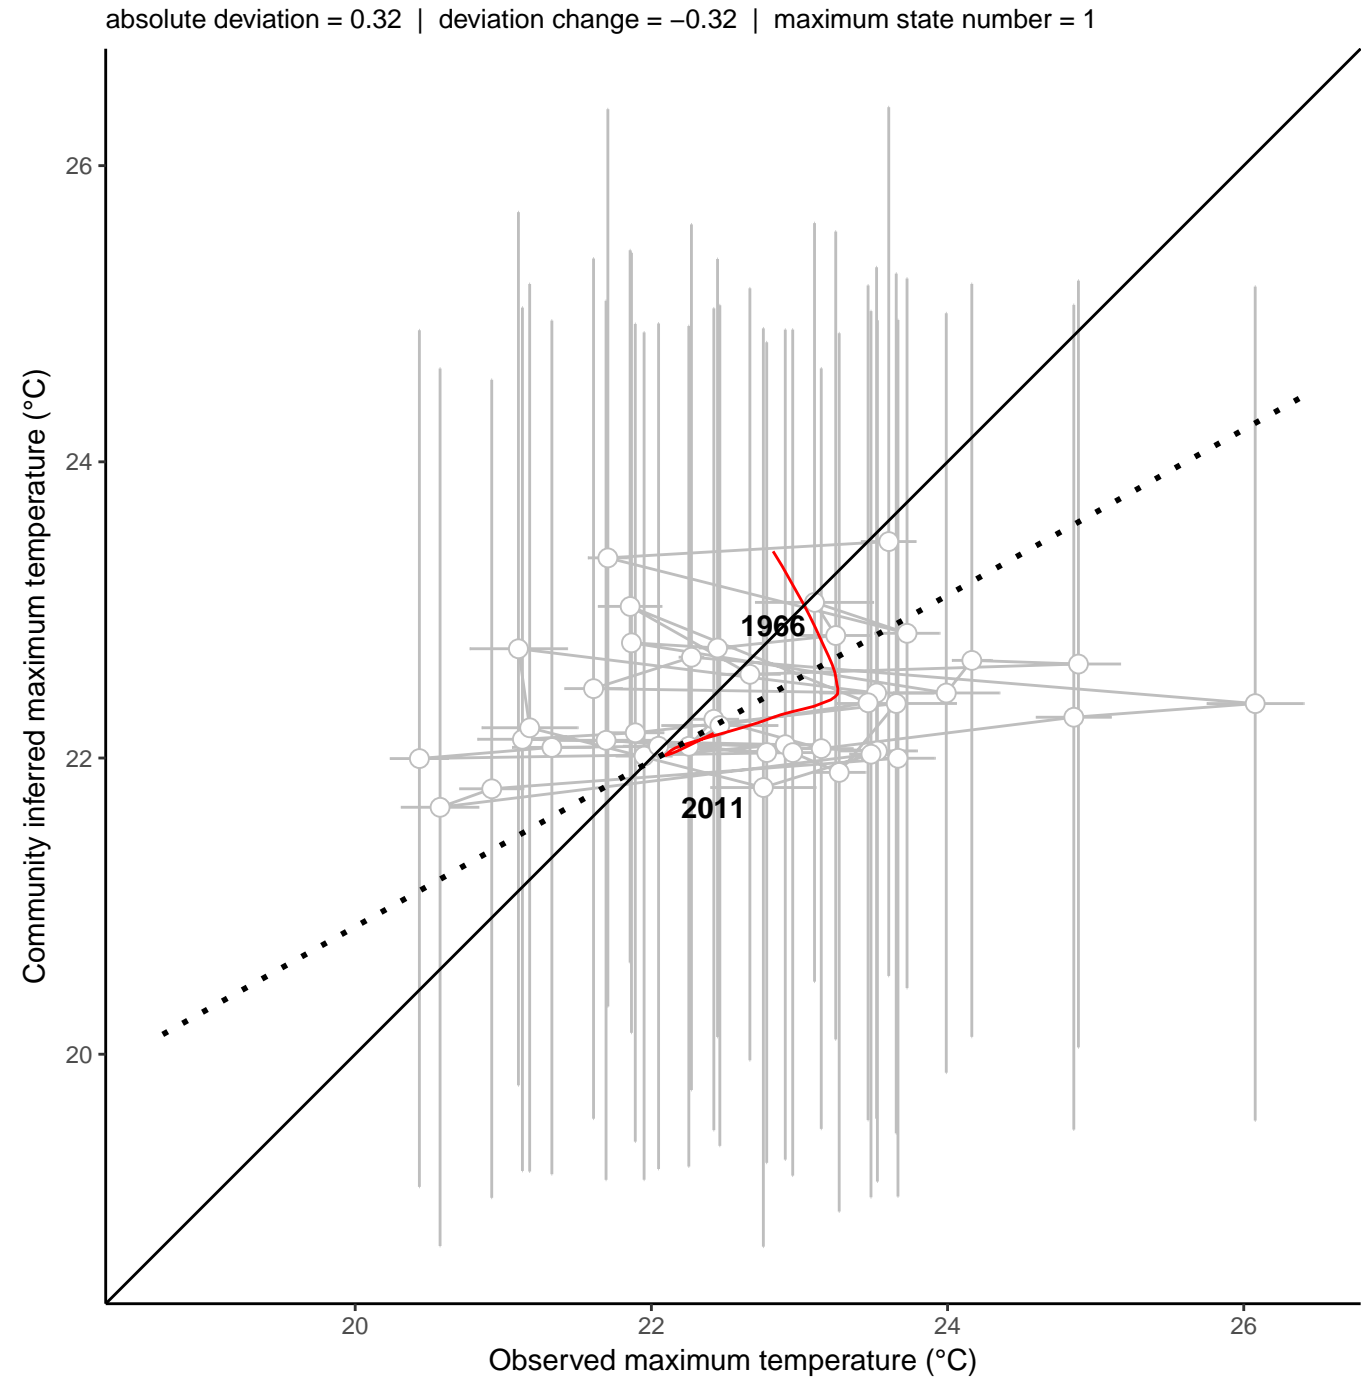

site : 840\_91\_50

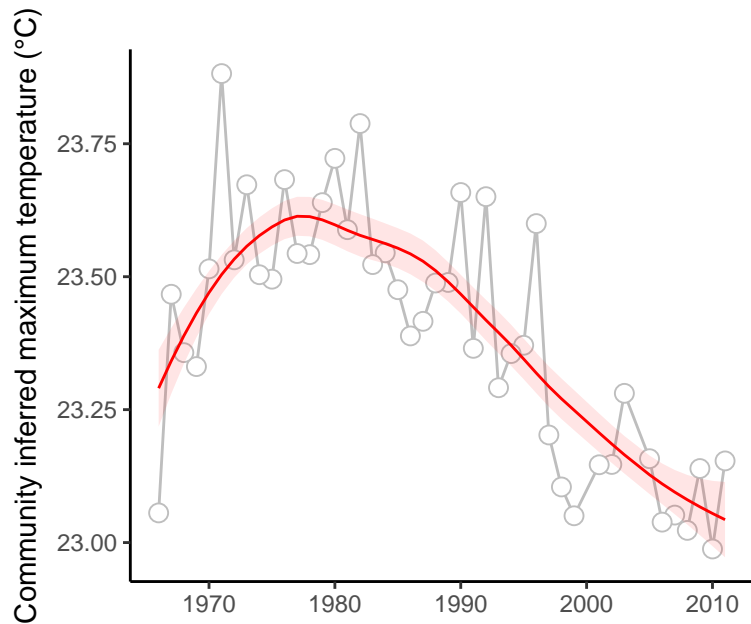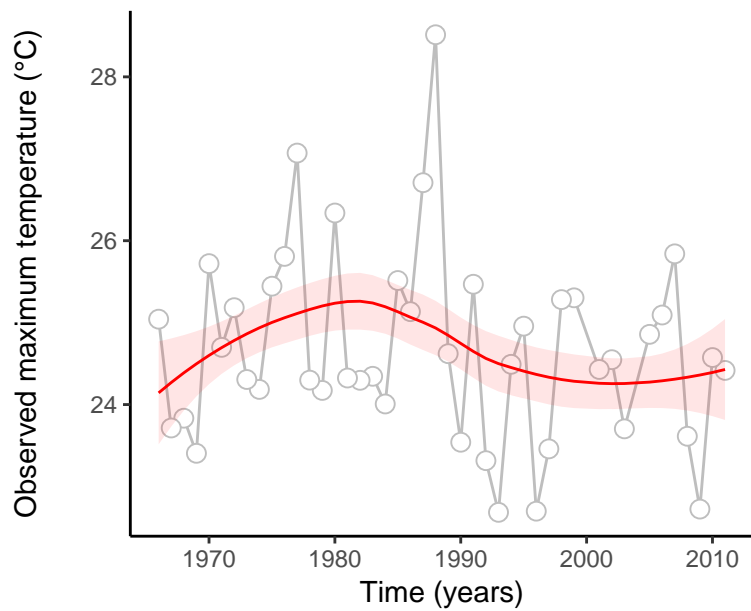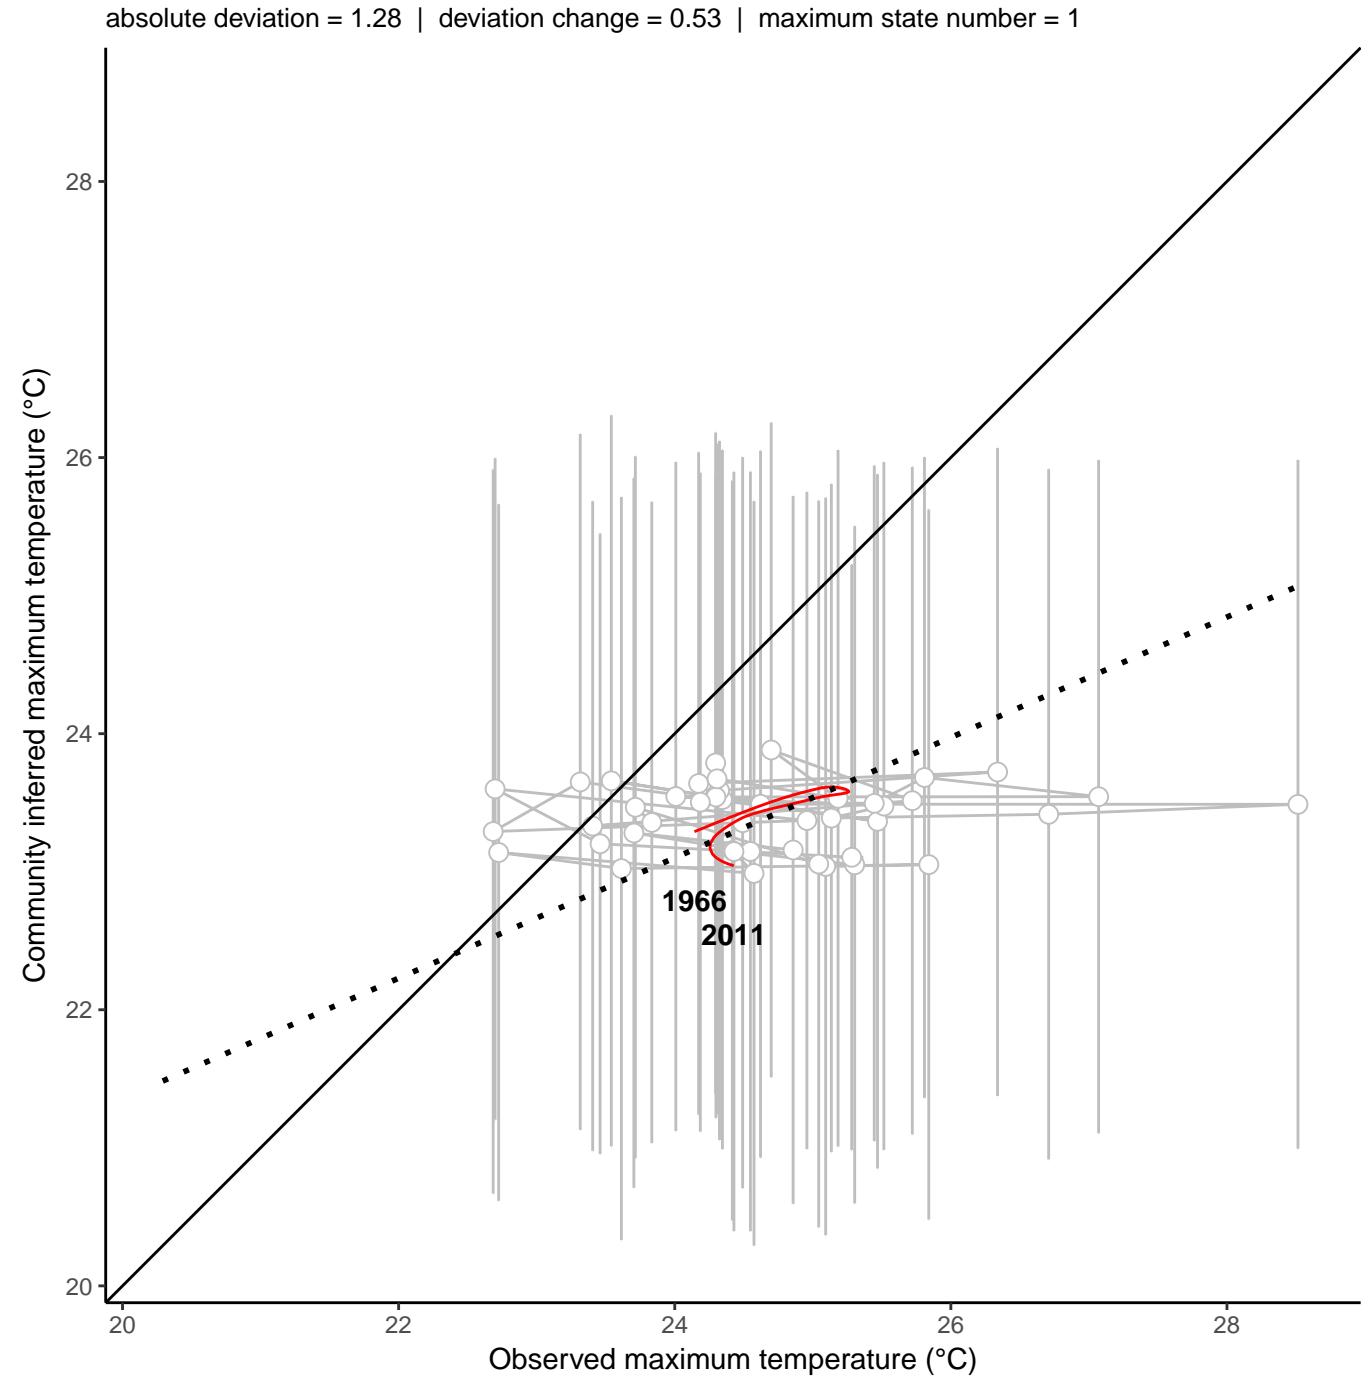

site : 840\_2\_15

absolute deviation = 4.07 | deviation change = 0.38 | maximum state number = 1

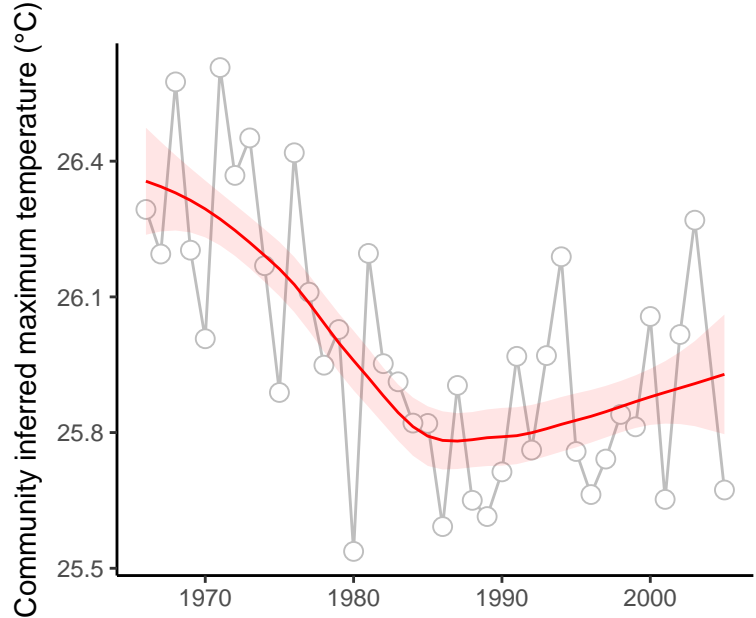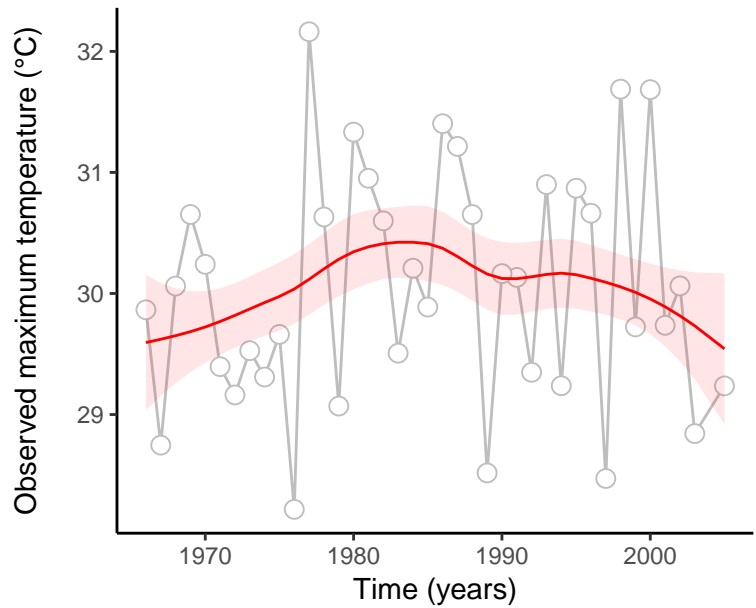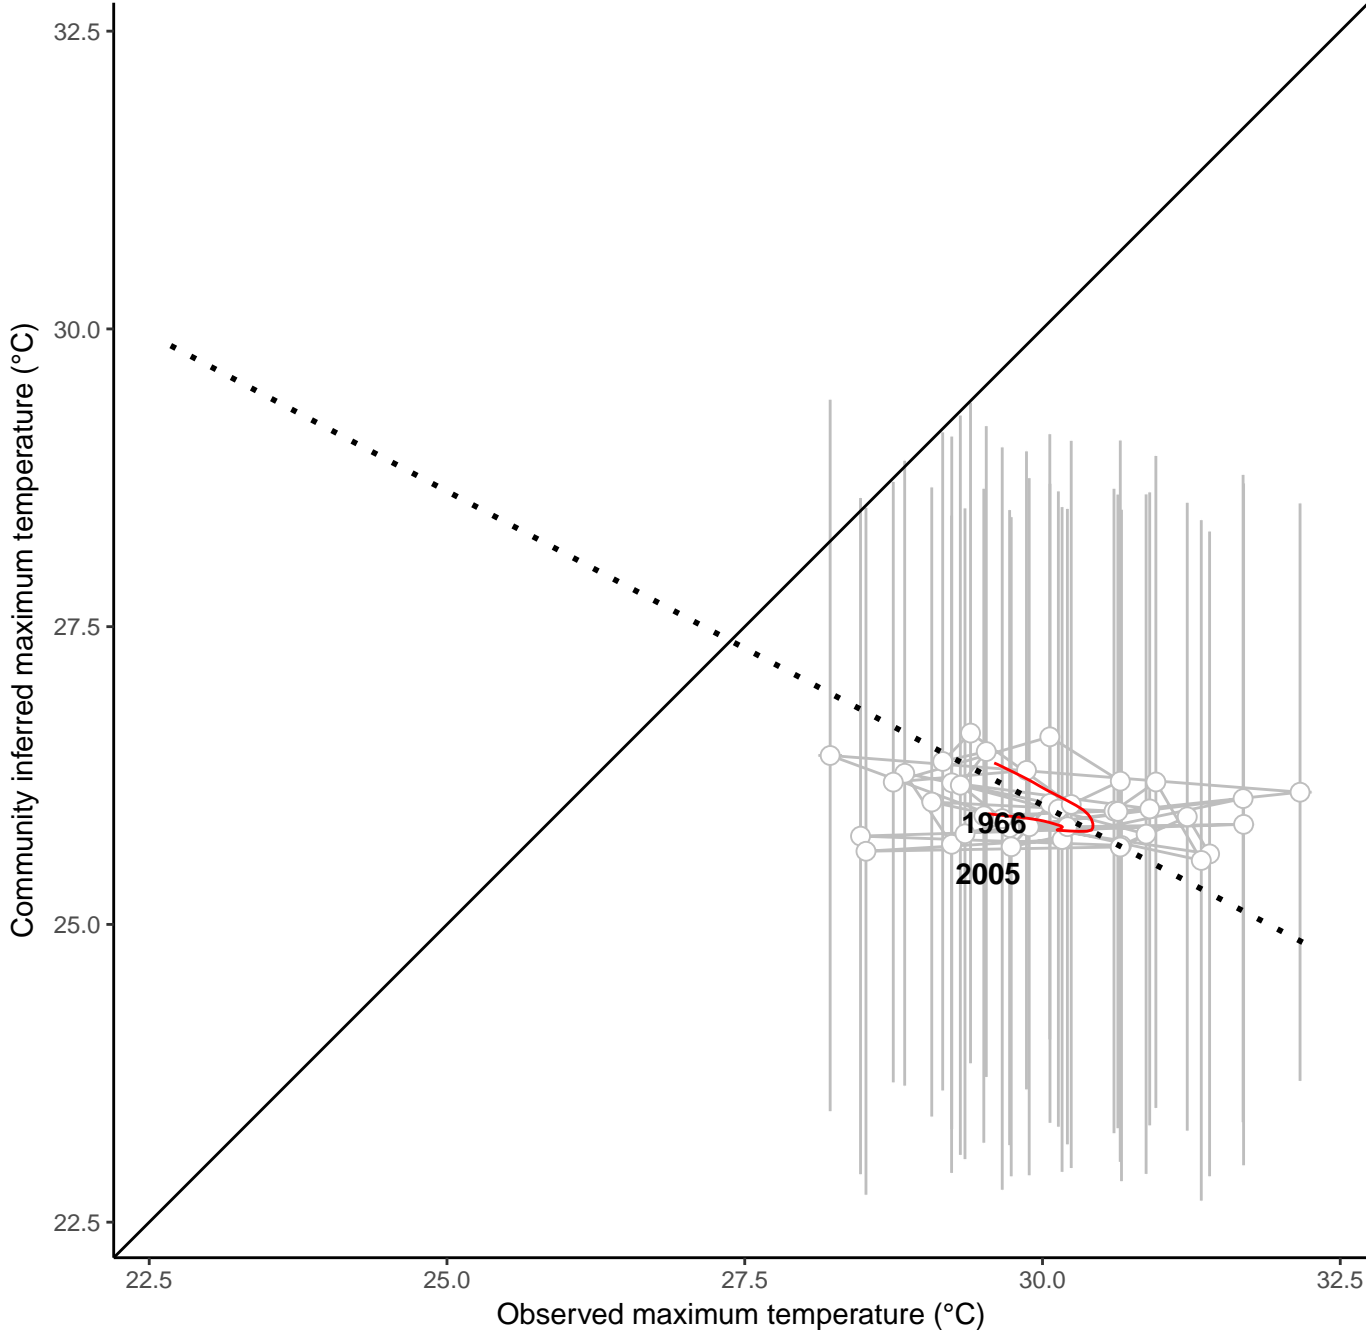

site : 840\_46\_13

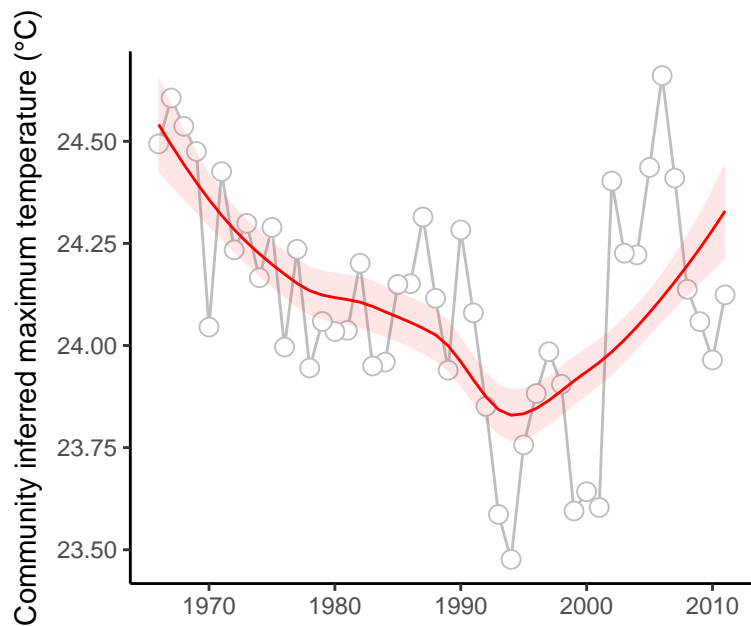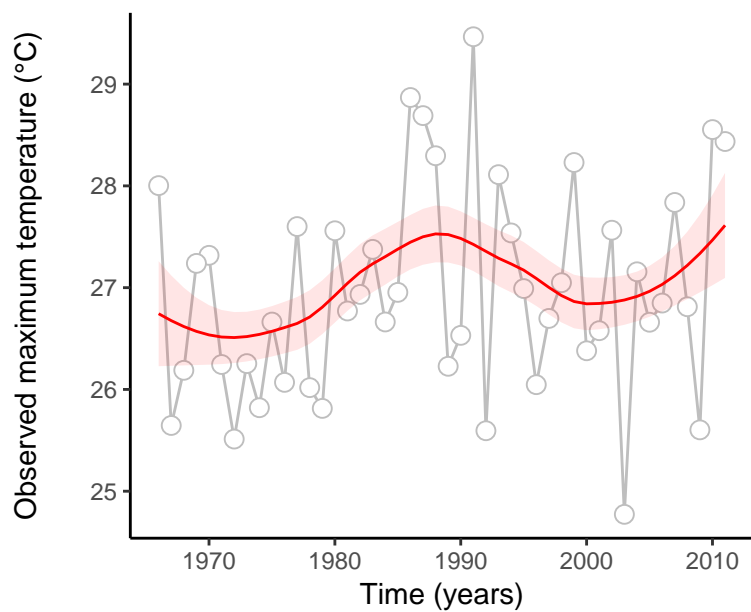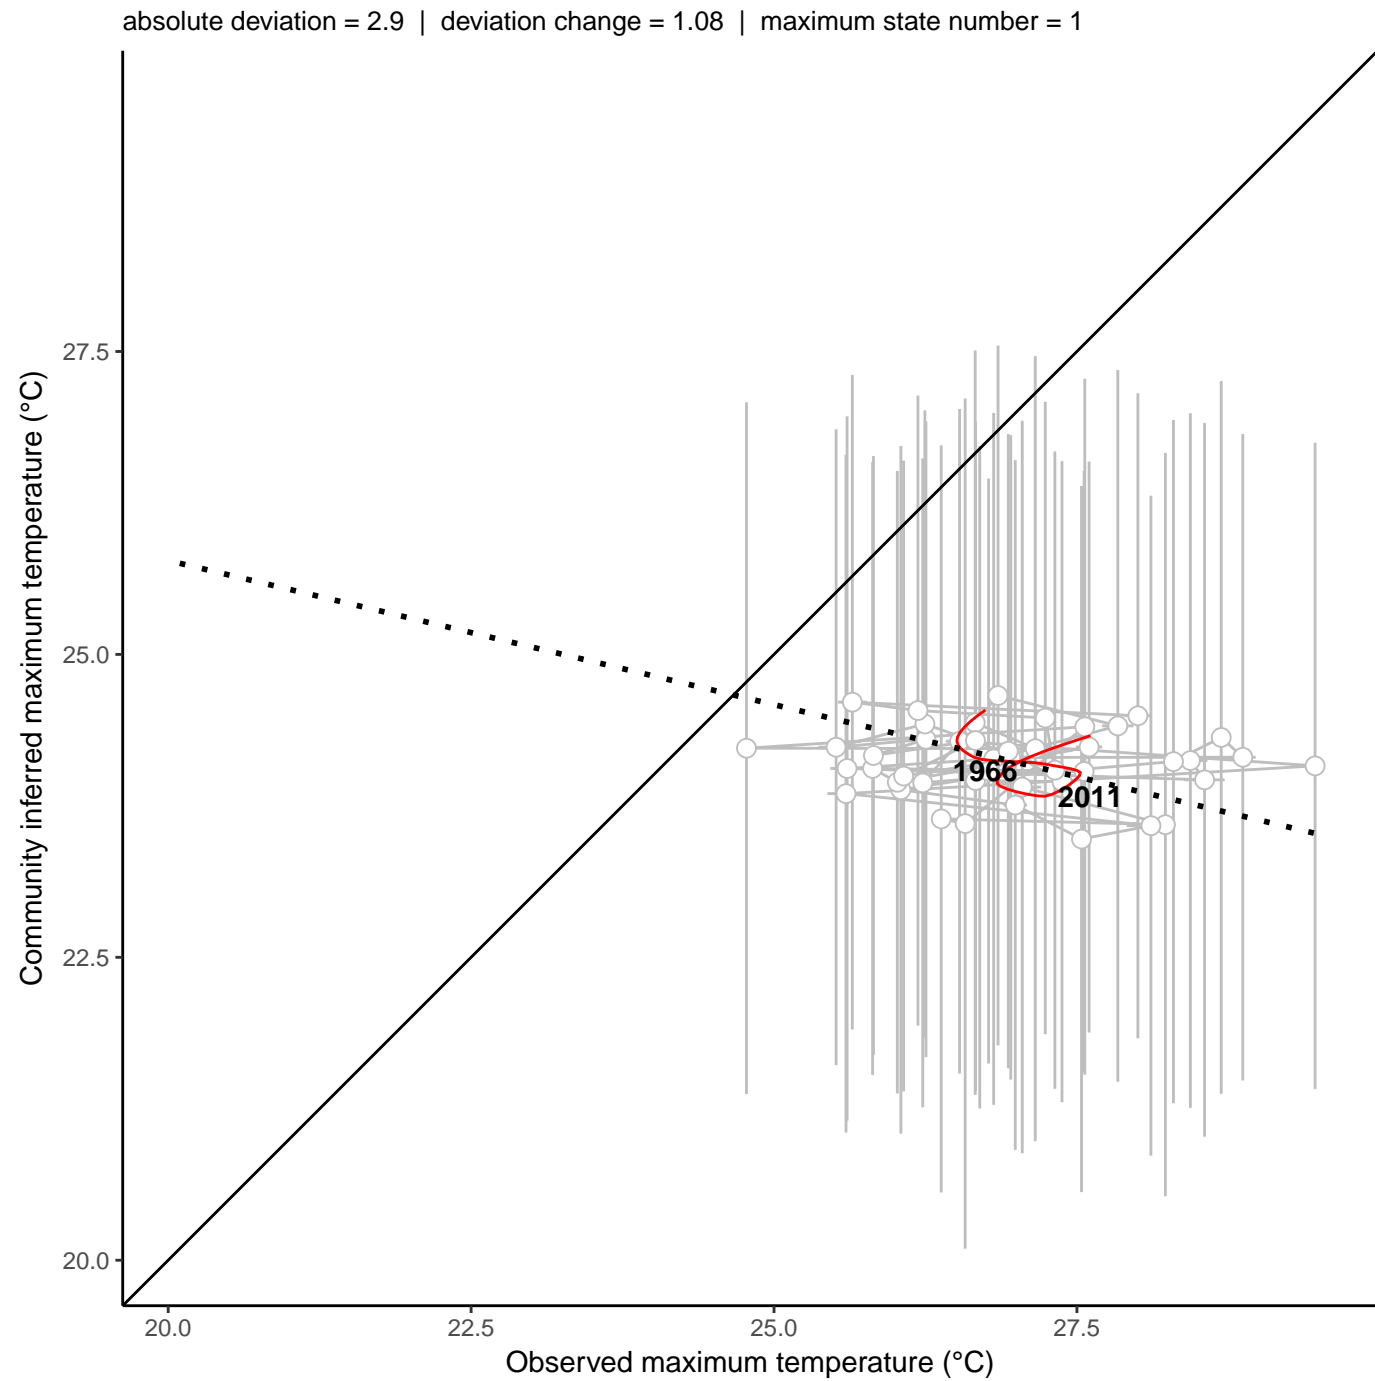

site : 840\_59\_19

absolute deviation = 1.09 | deviation change = -0.43 | maximum state number = 2

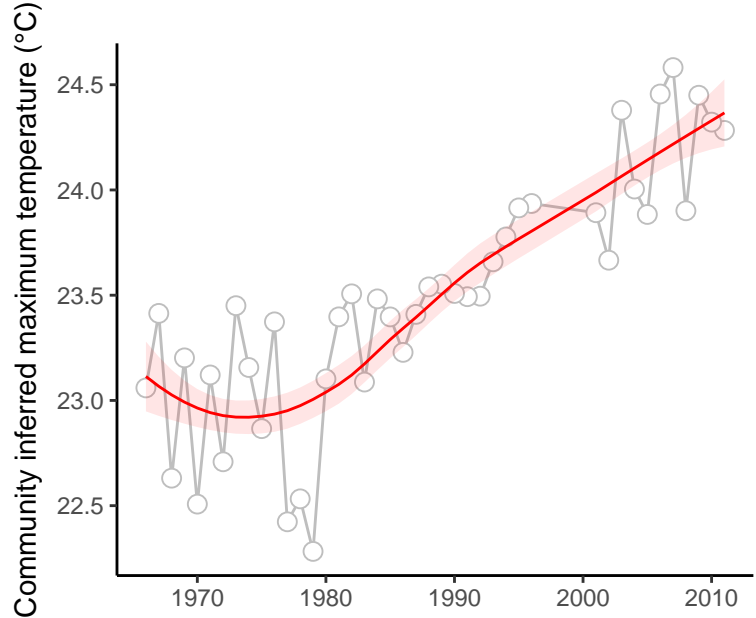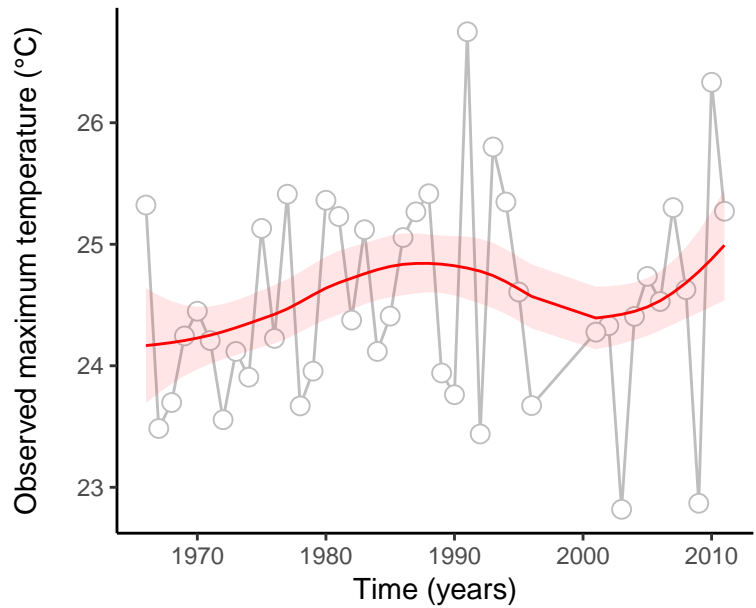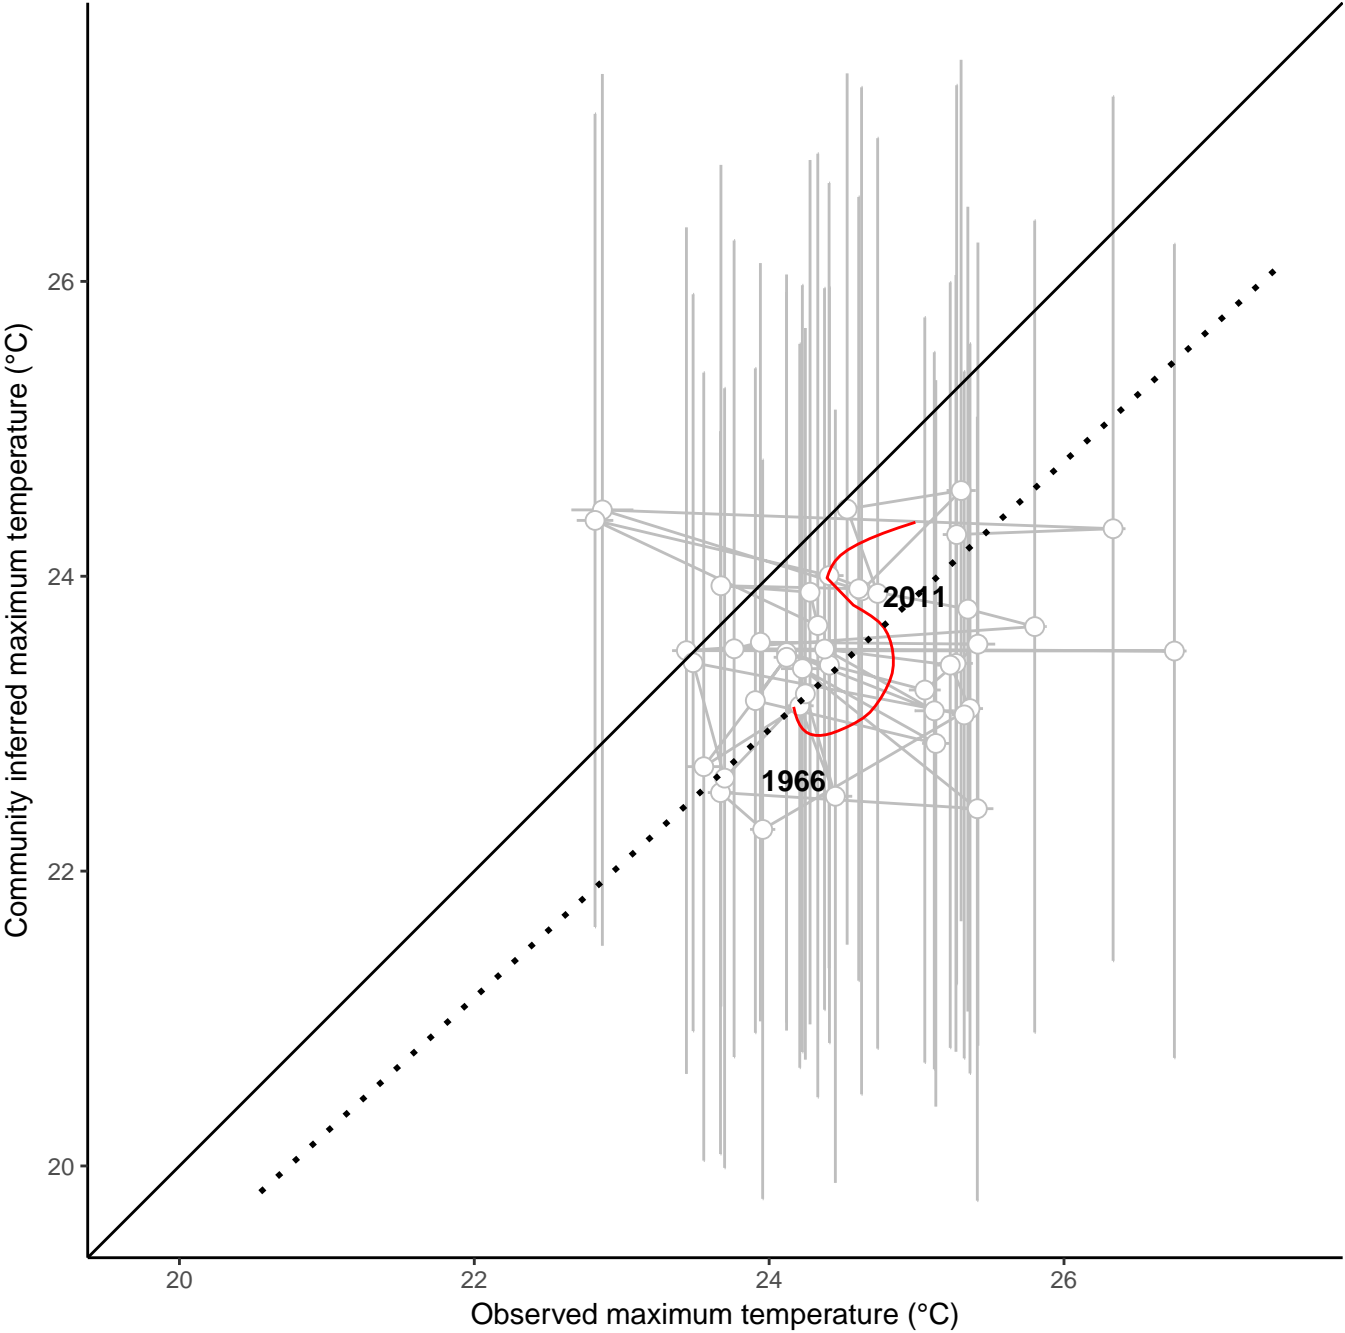

site : 840\_66\_42

absolute deviation = 2.1 | deviation change = 1.25 | maximum state number = 1

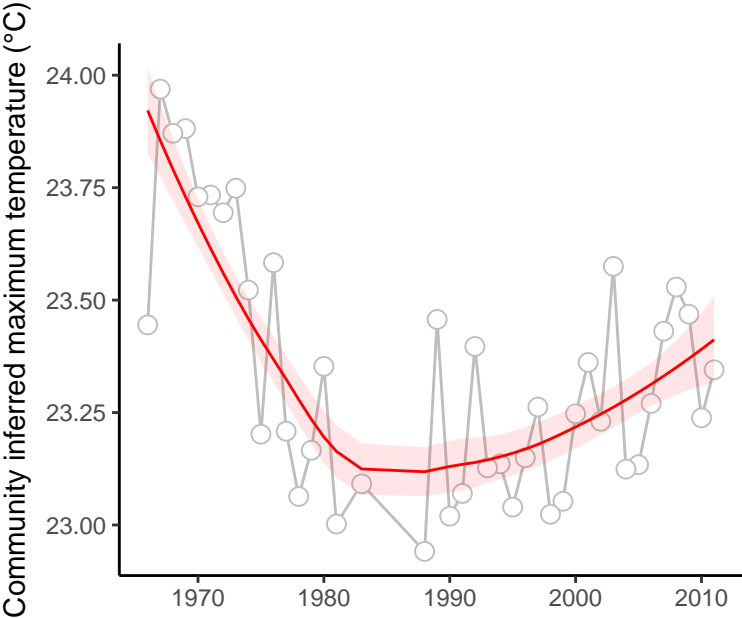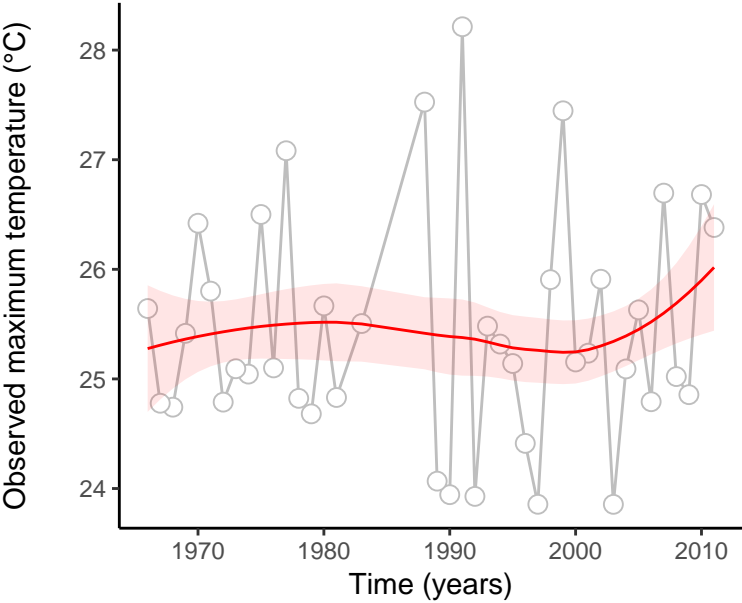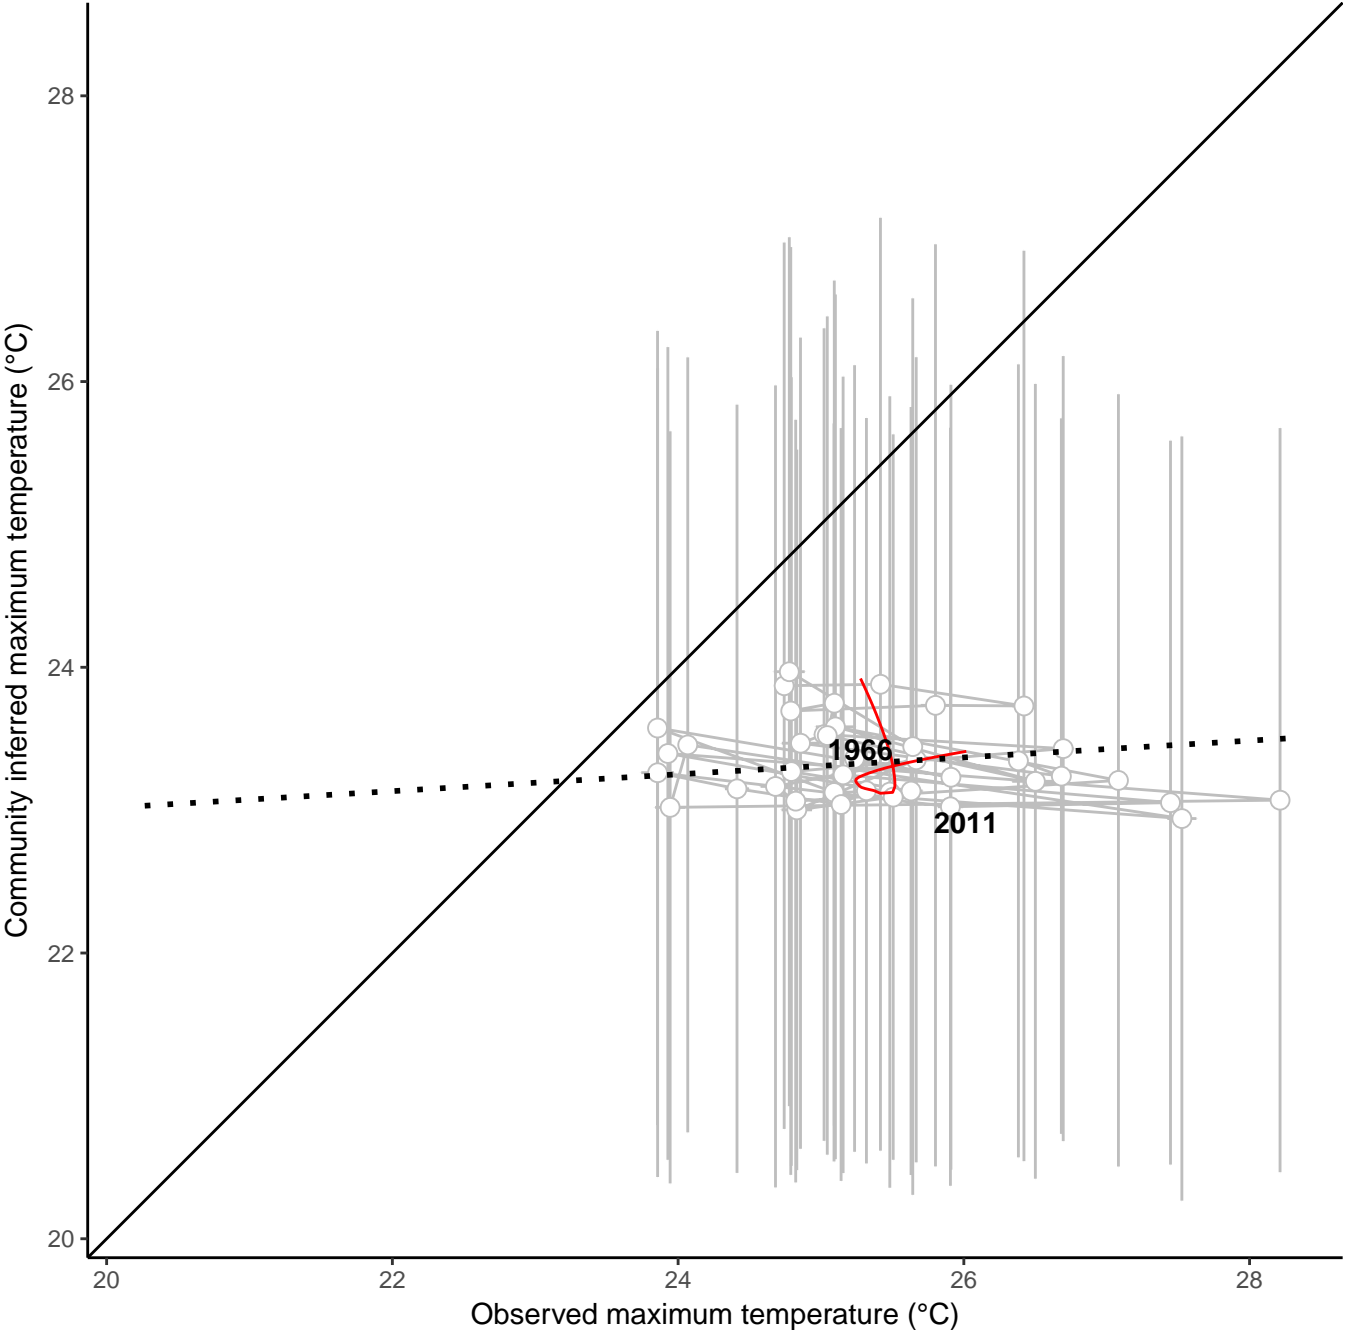



site : 840\_7\_12

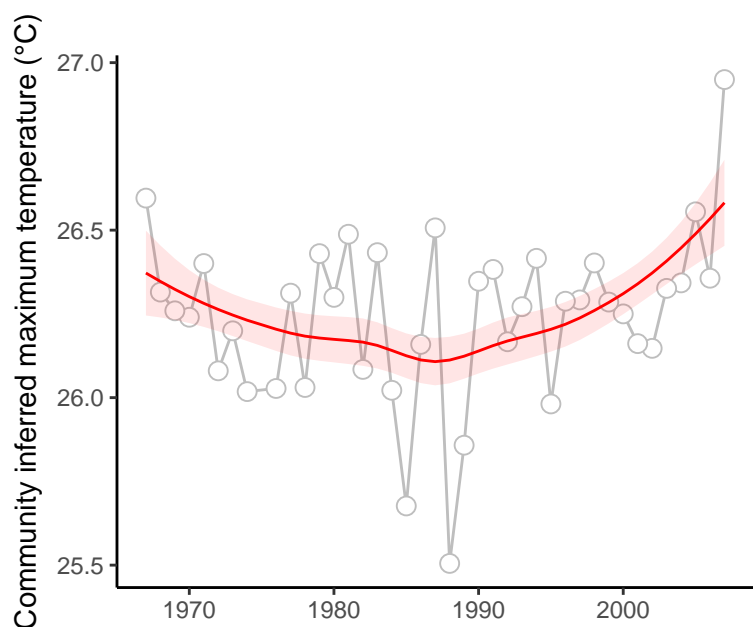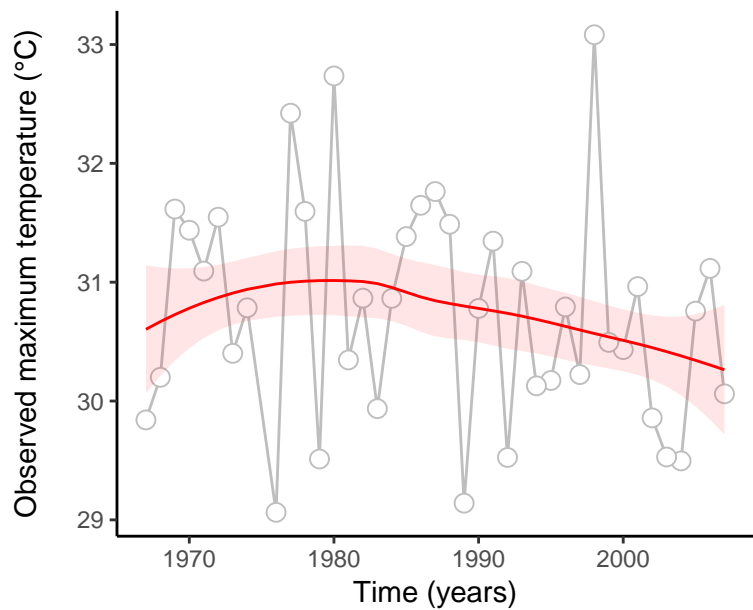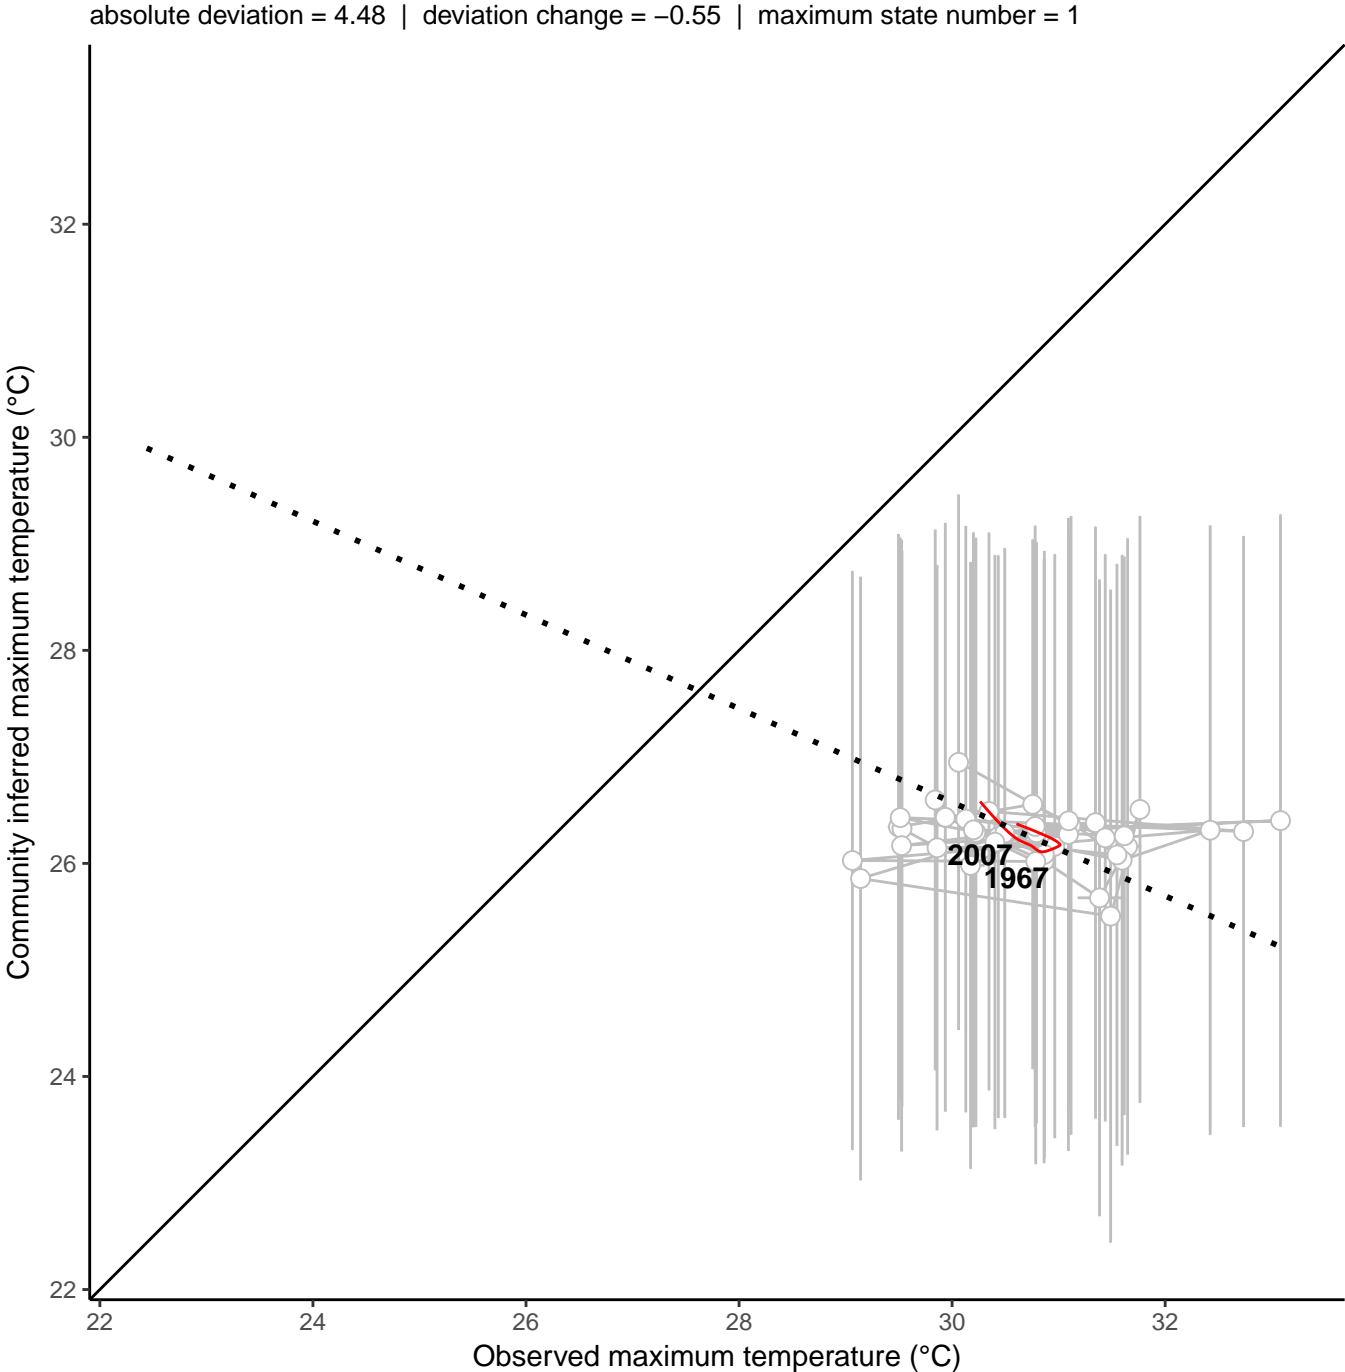

site : 840\_7\_7

absolute deviation = 4.72 | deviation change = 1.2 | maximum state number = 1

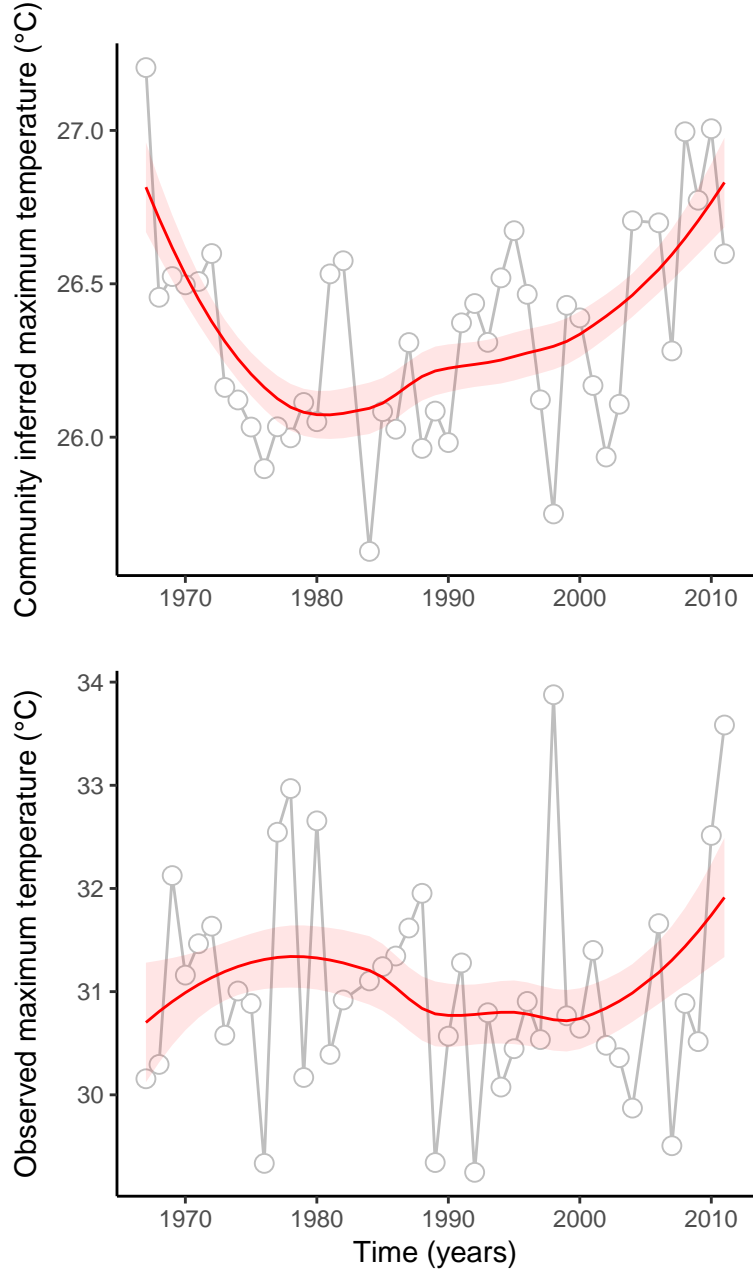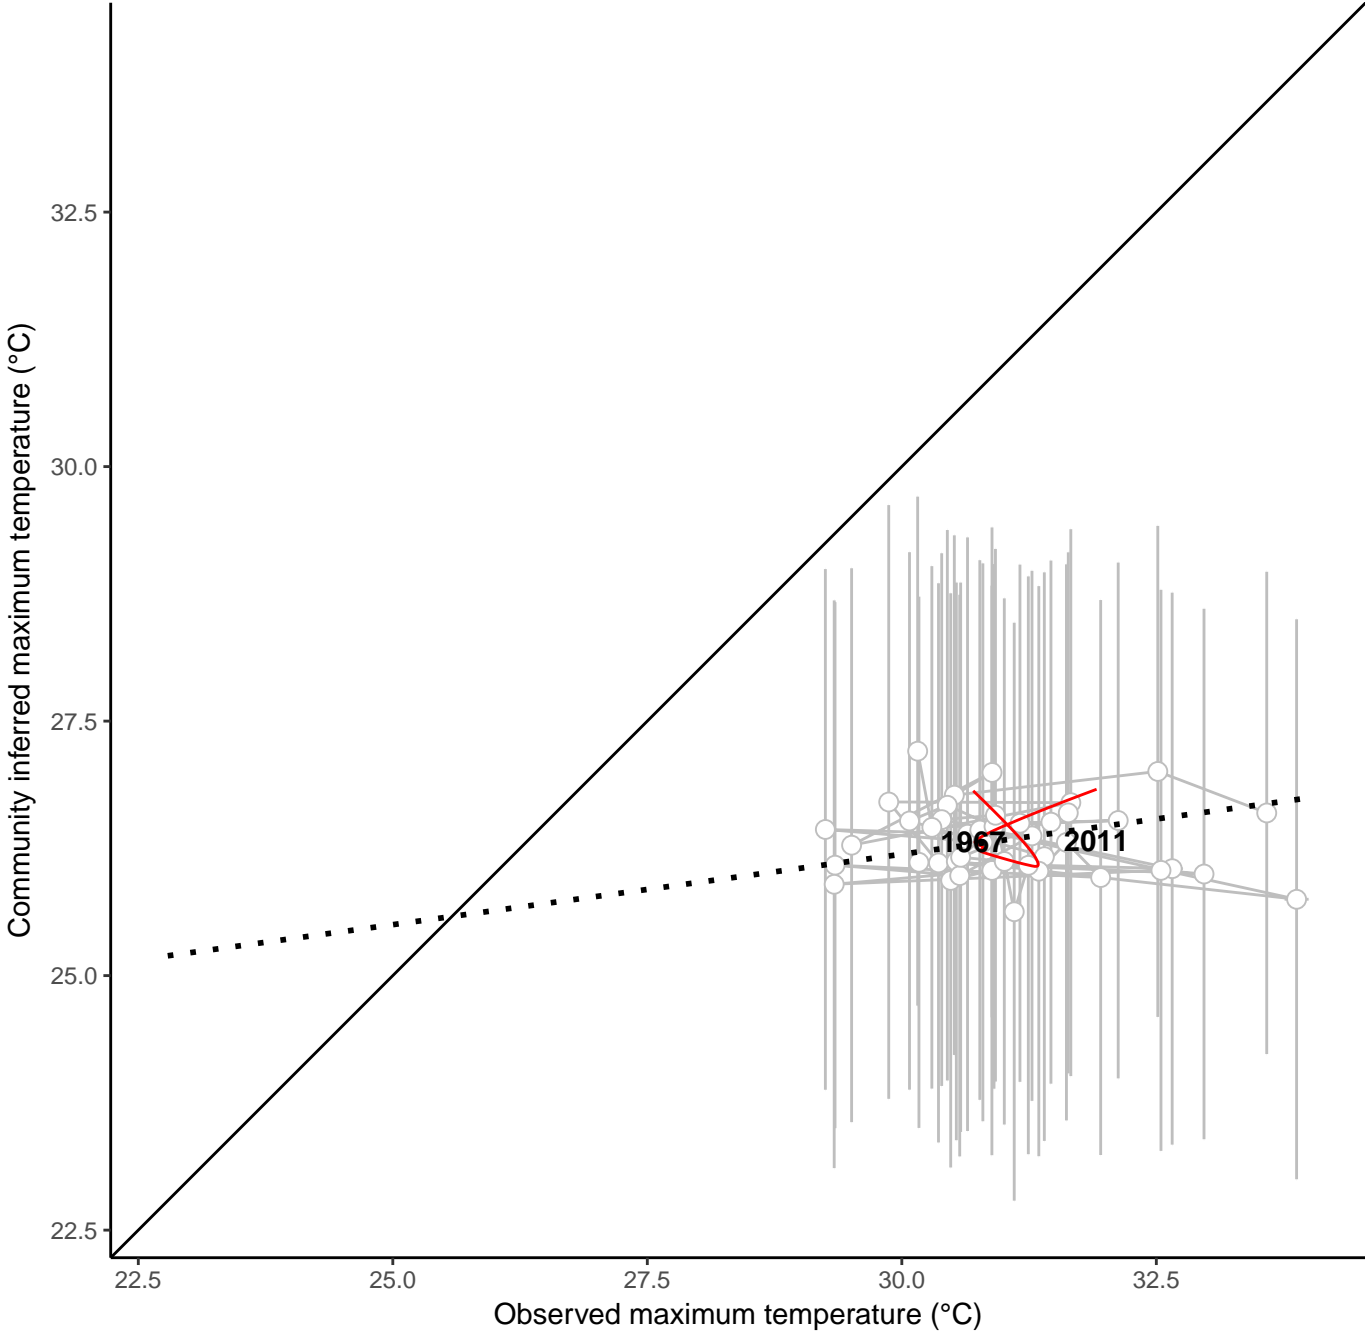

site : 840\_72\_83

absolute deviation = 1.1 | deviation change = -0.08 | maximum state number = 1

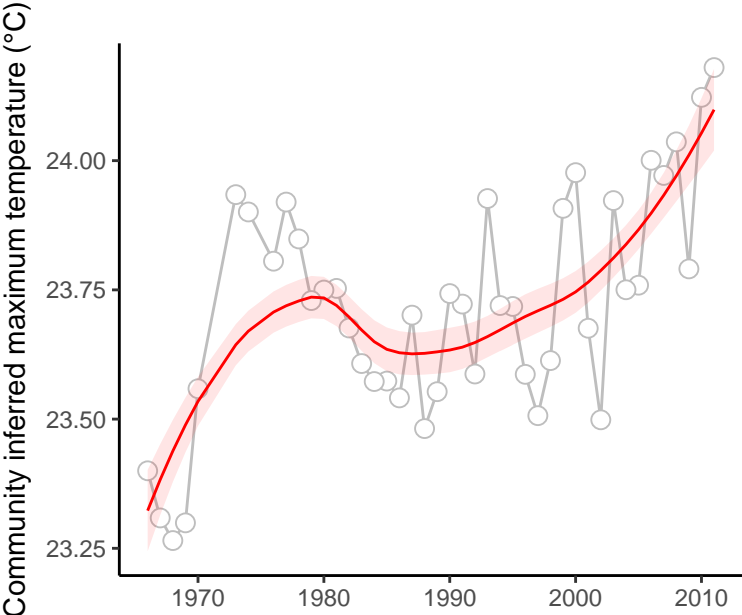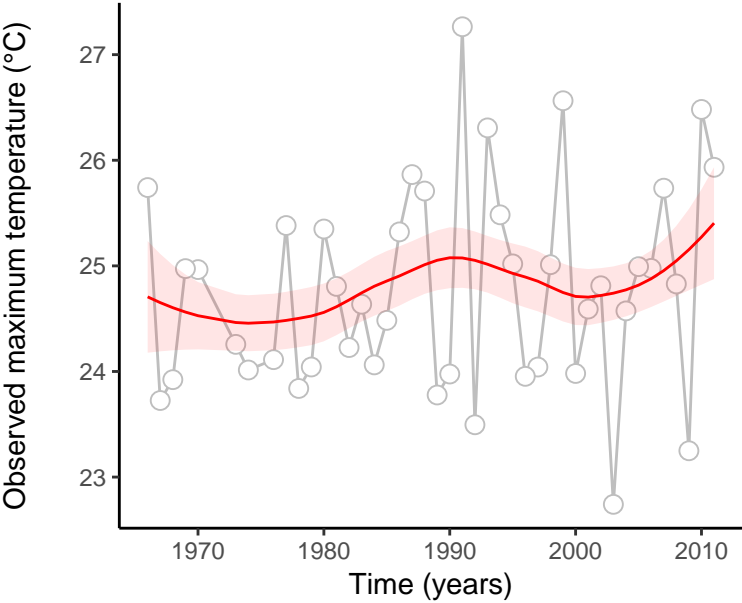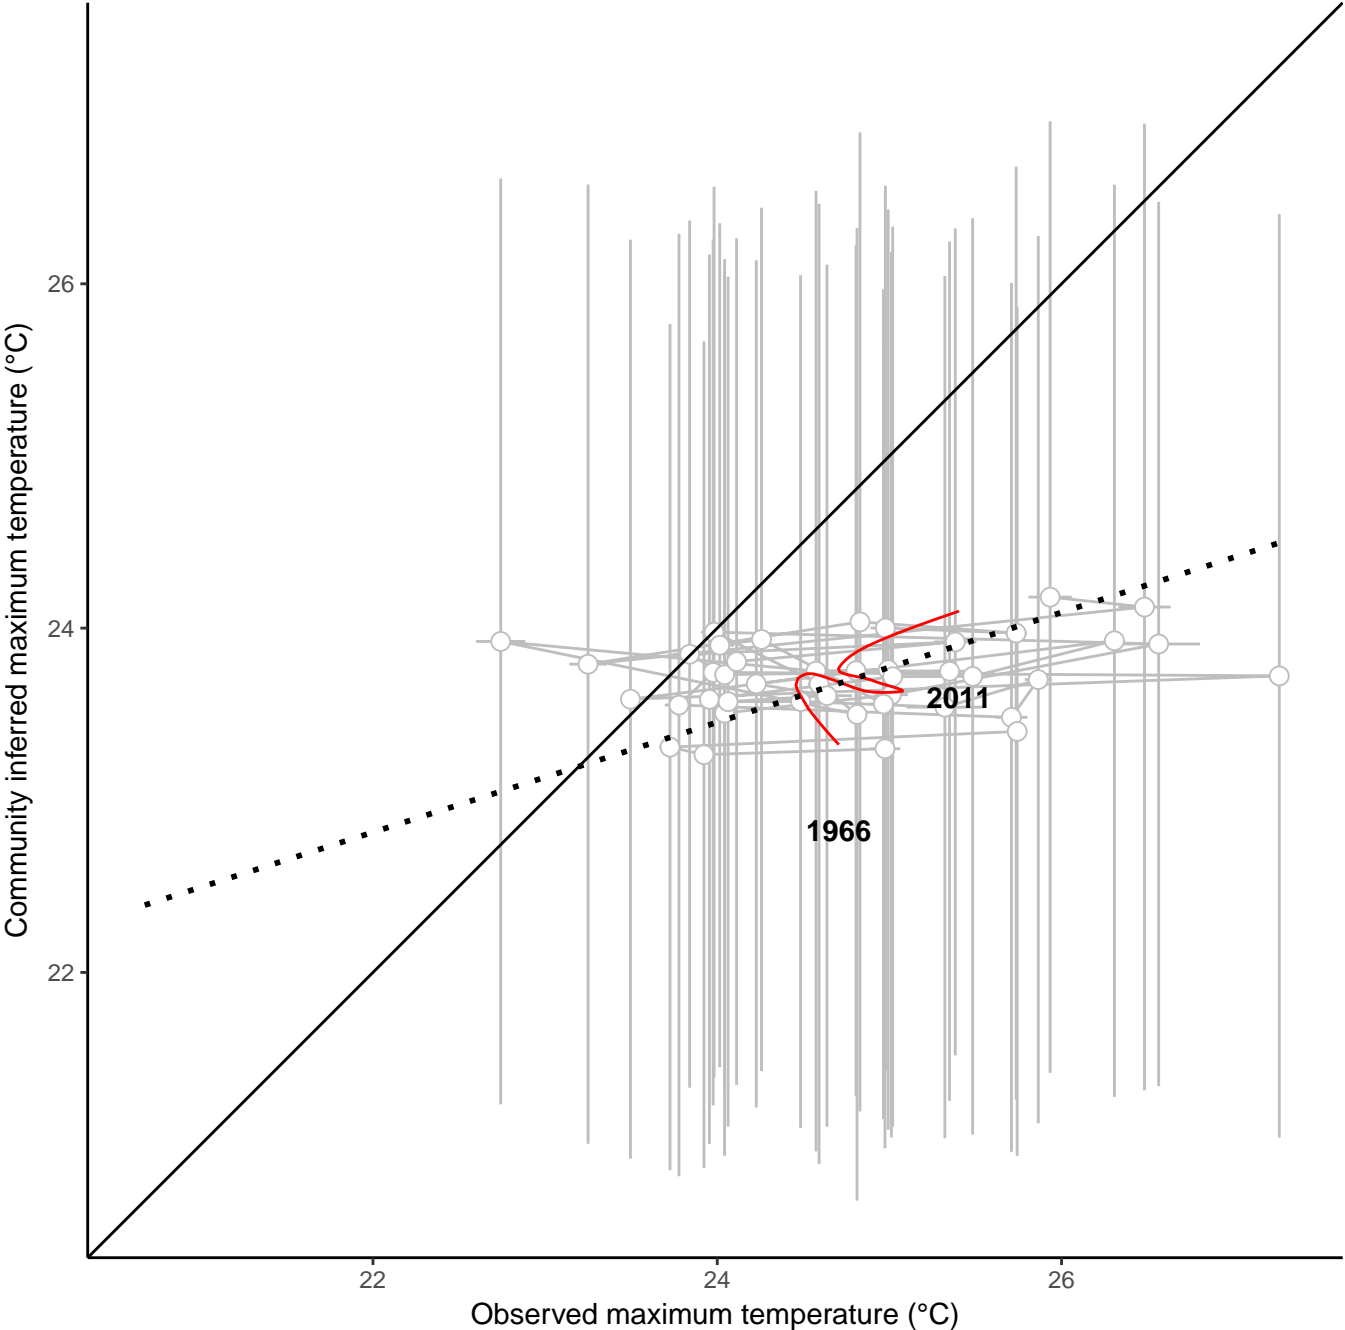

site : 840\_82\_19

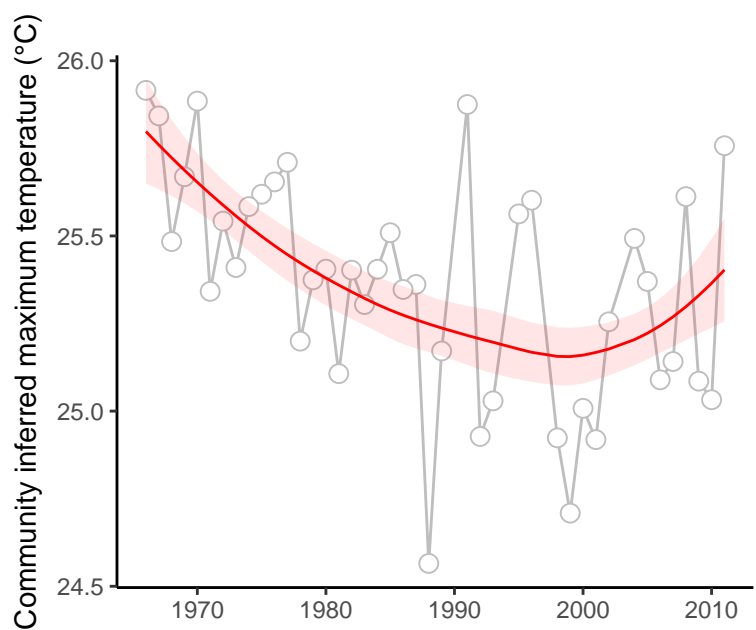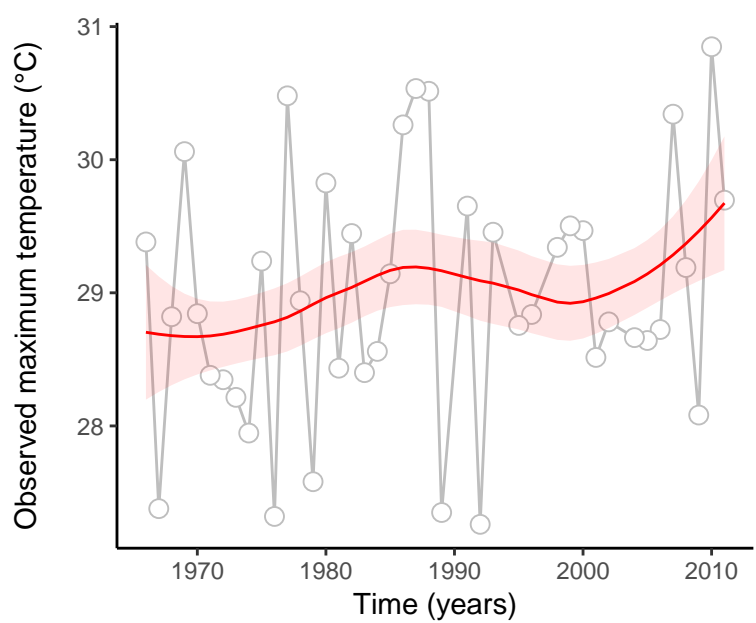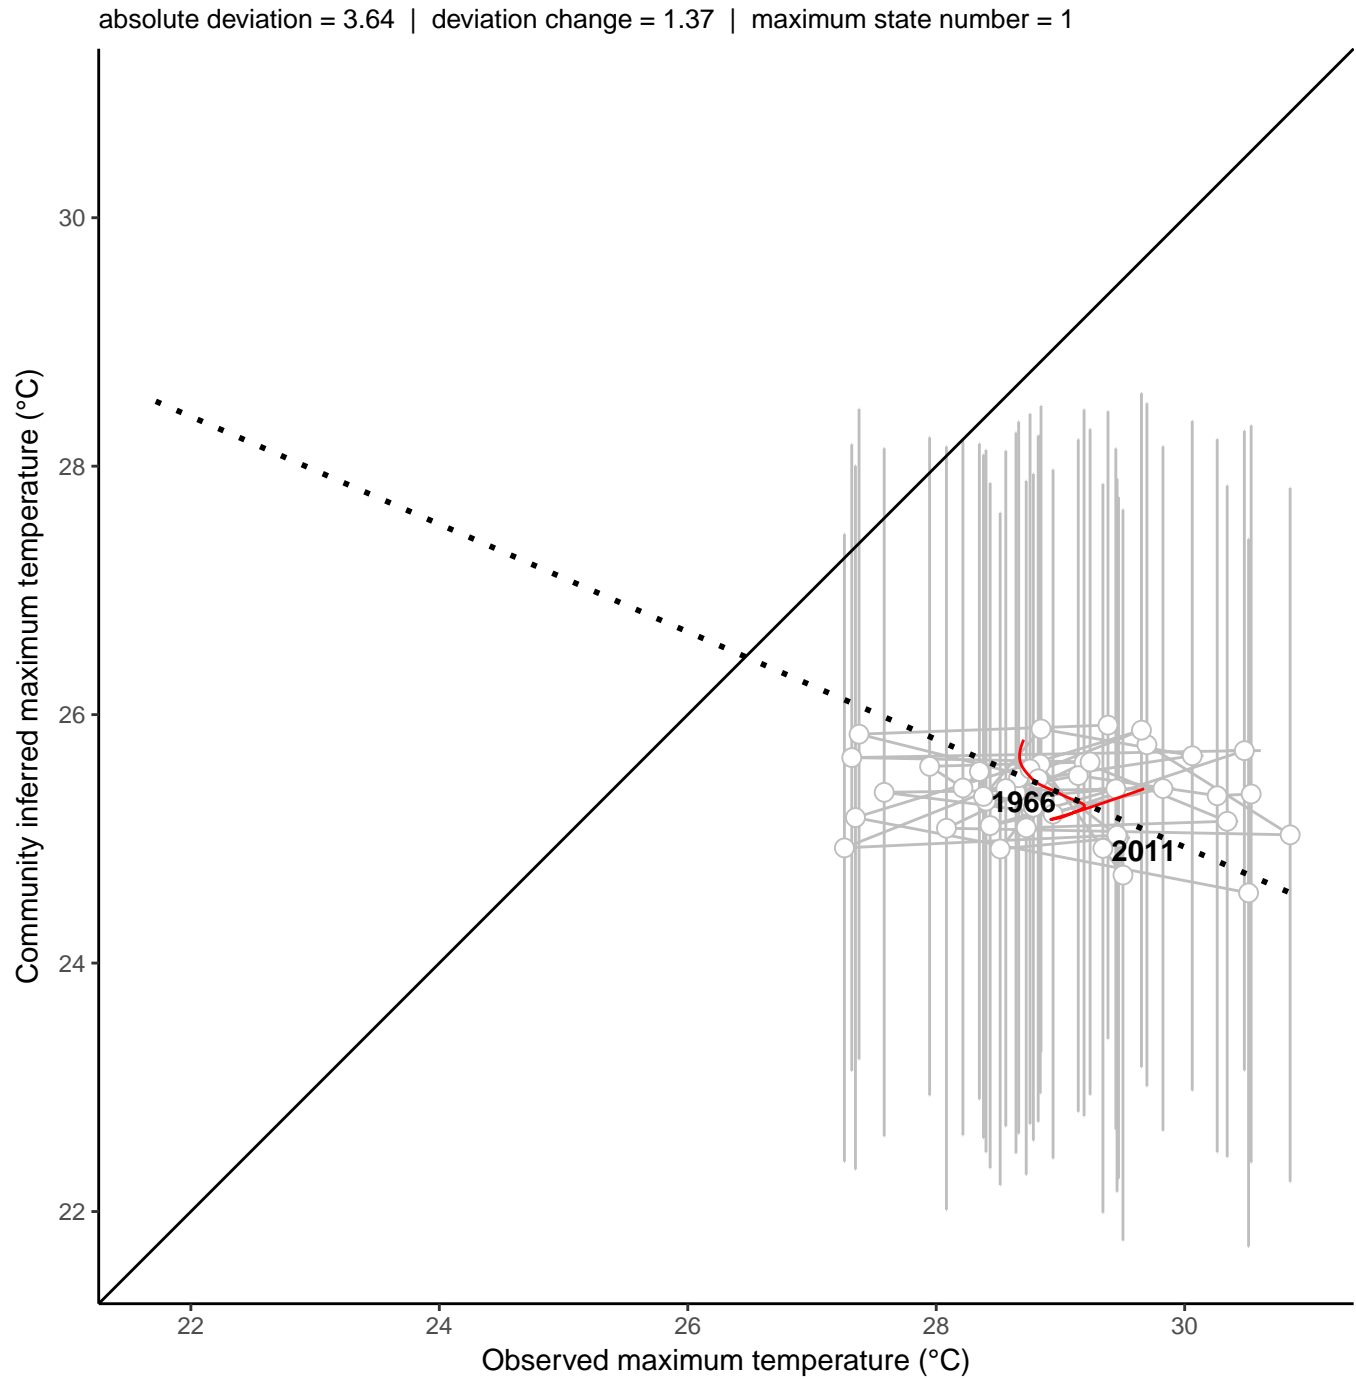

site : 840\_82\_38

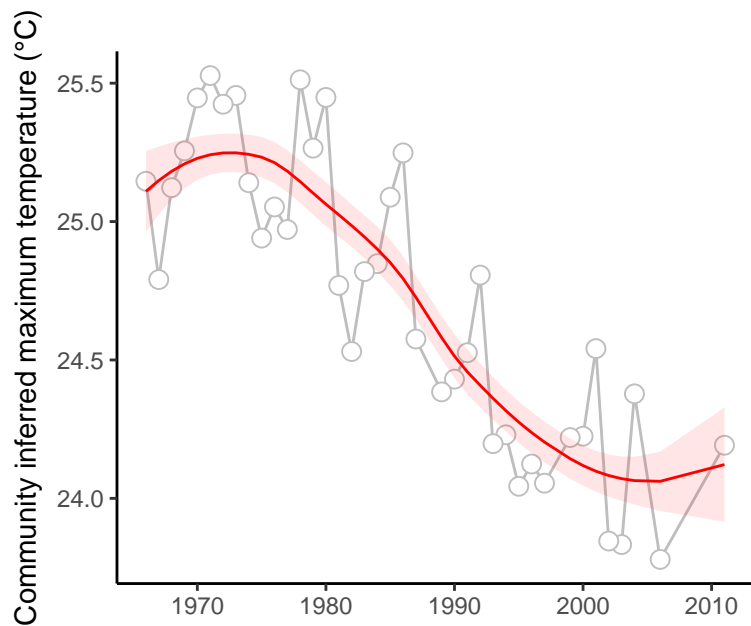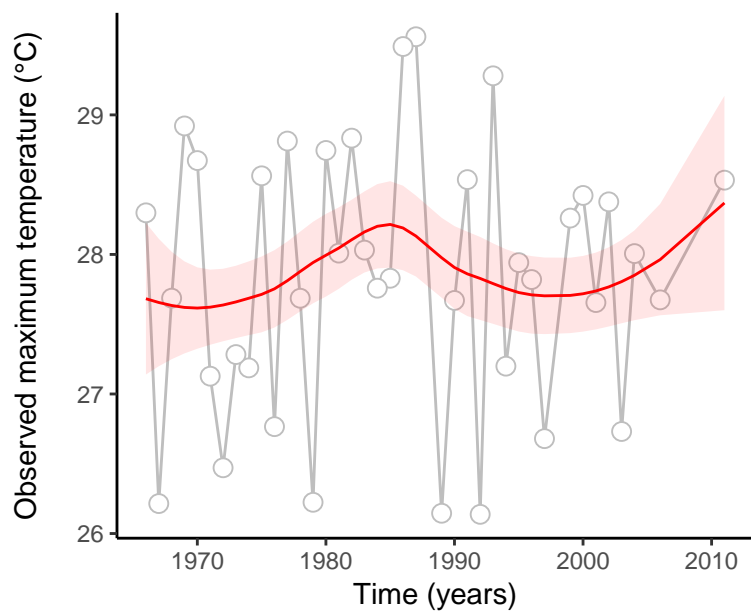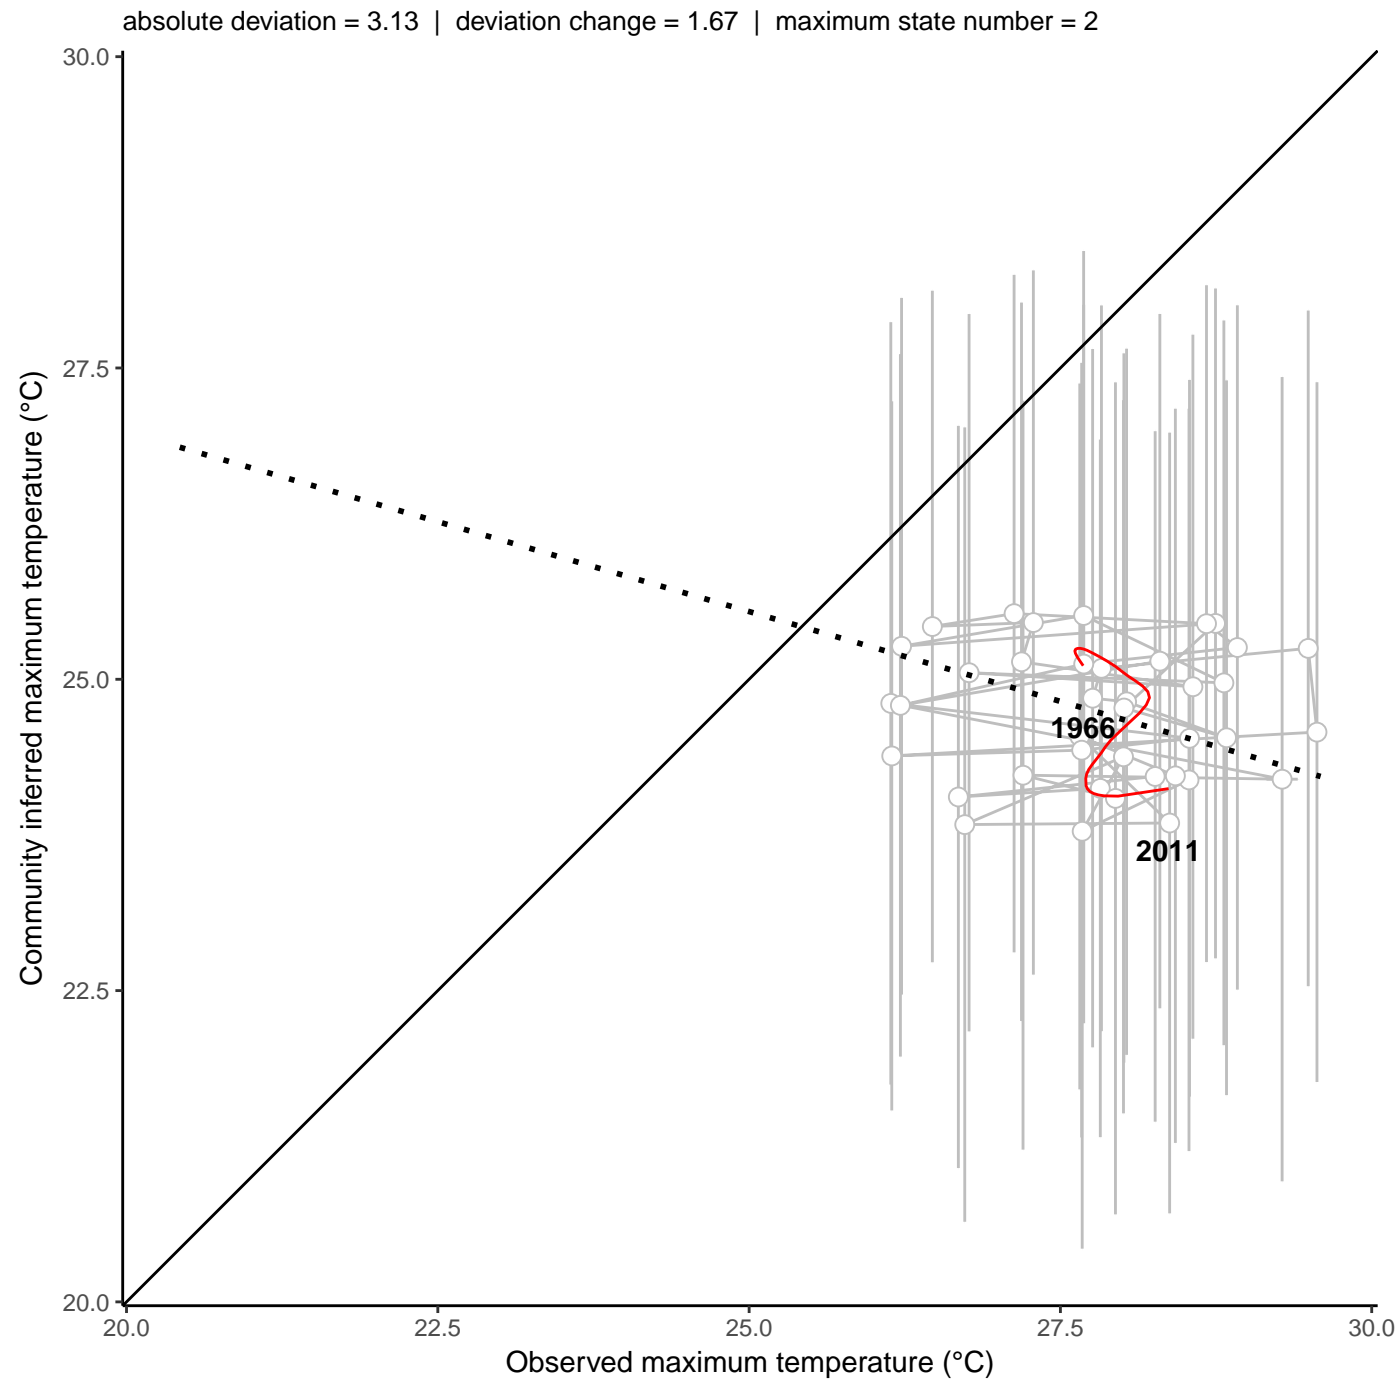

site : 840\_83\_33

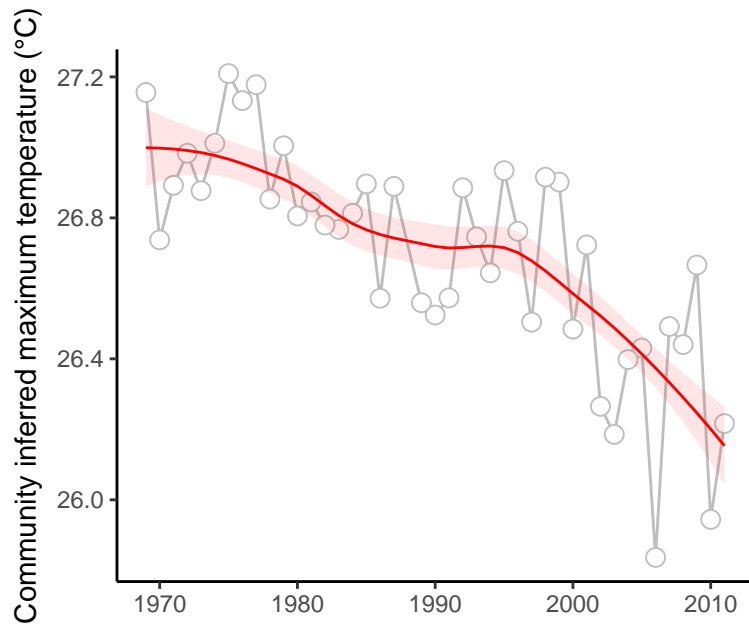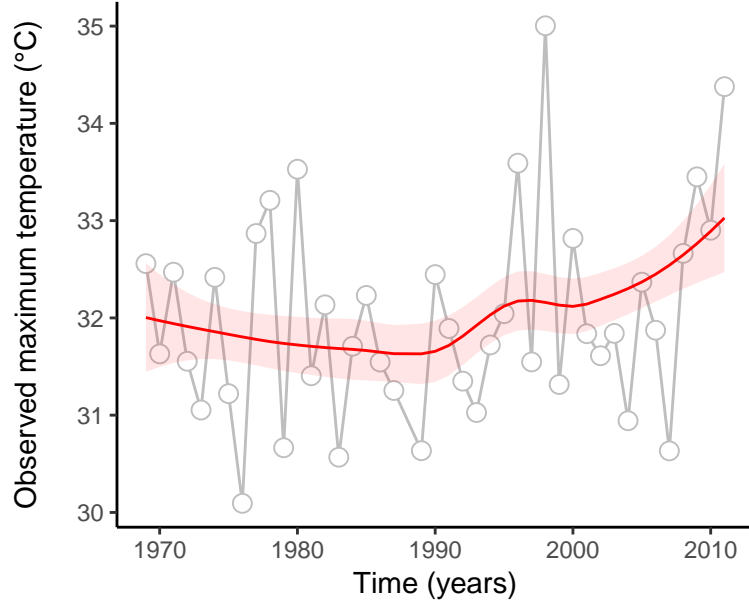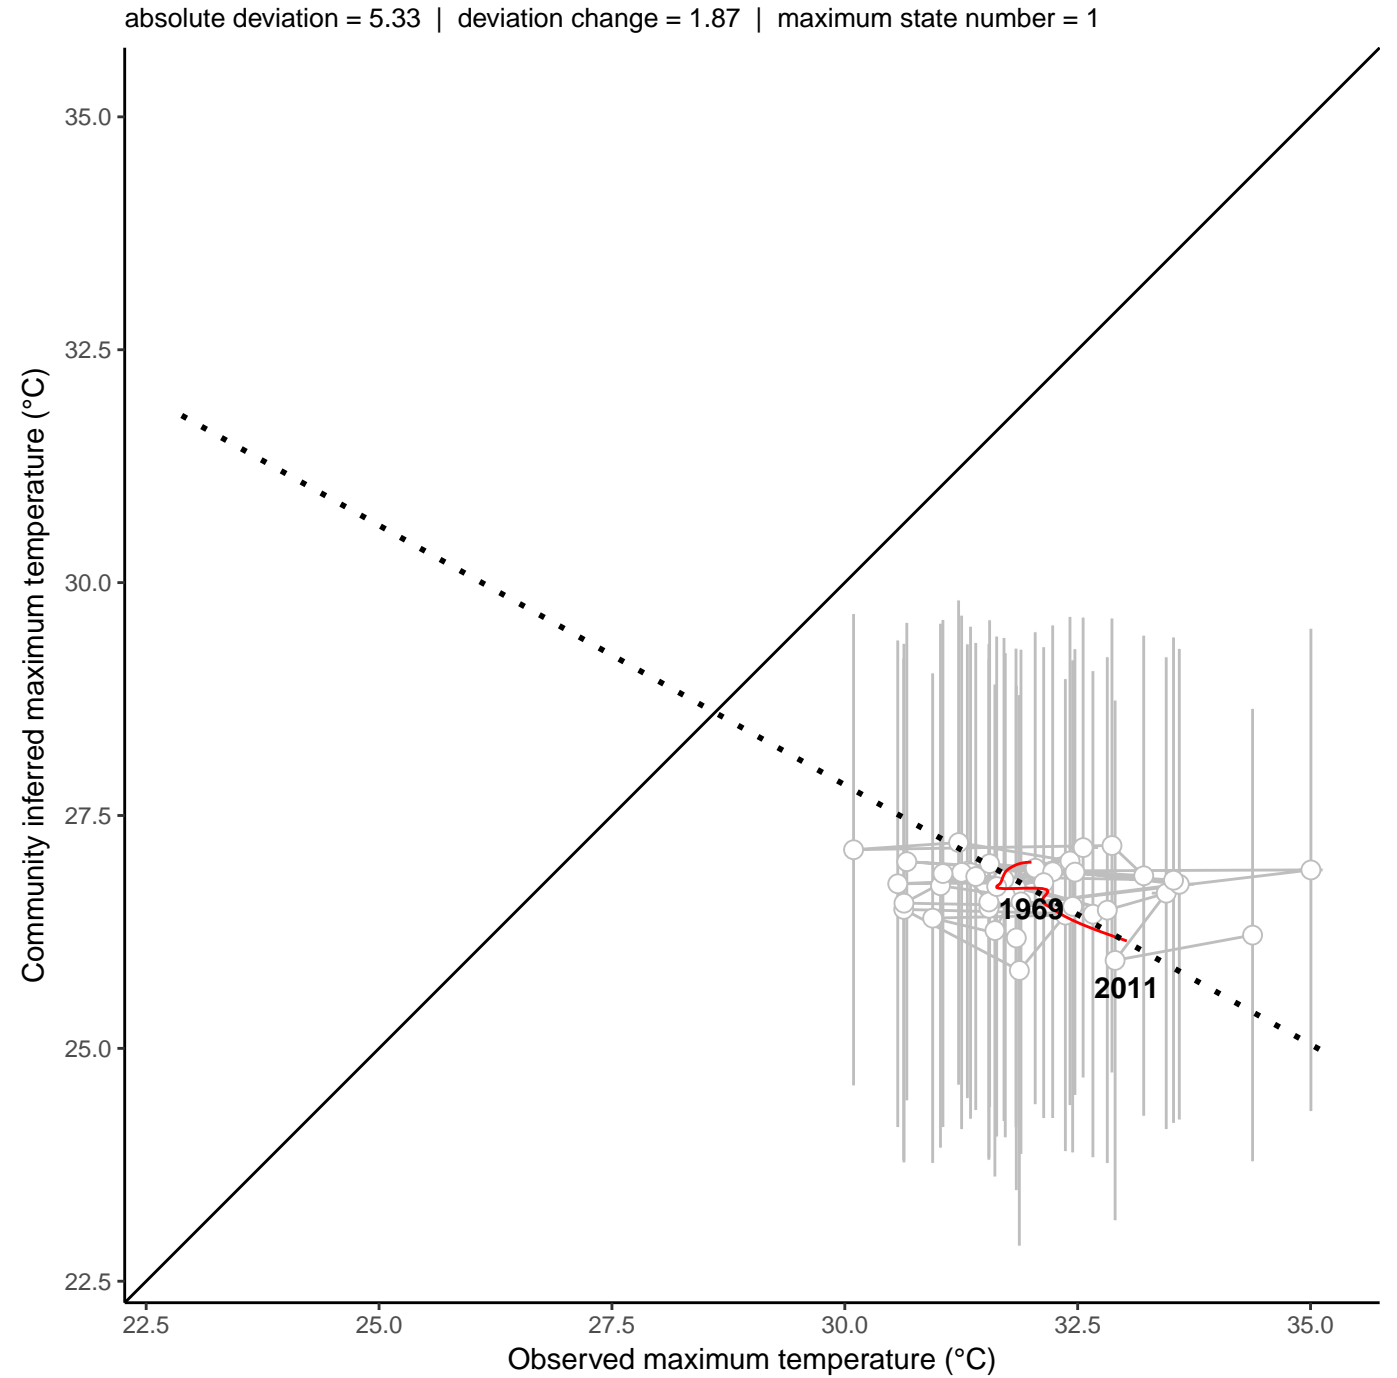

site : 840\_83\_65

absolute deviation = 5.9 | deviation change = 0.48 | maximum state number = 1

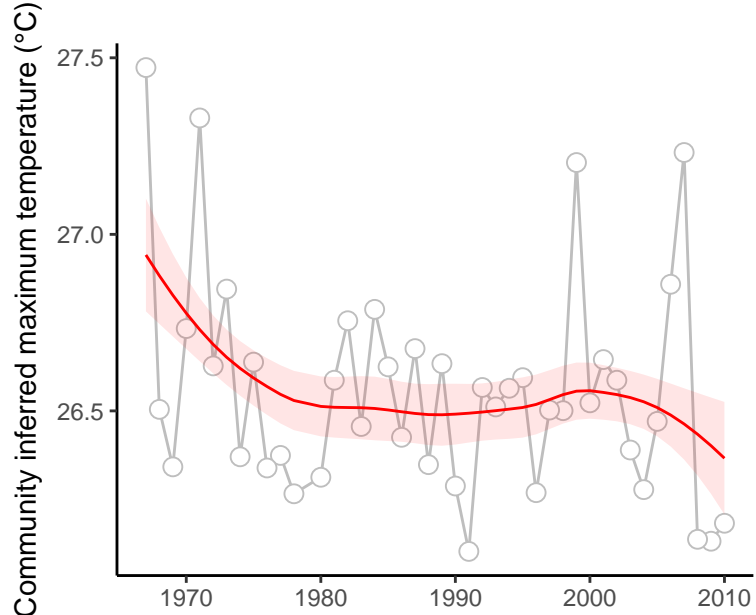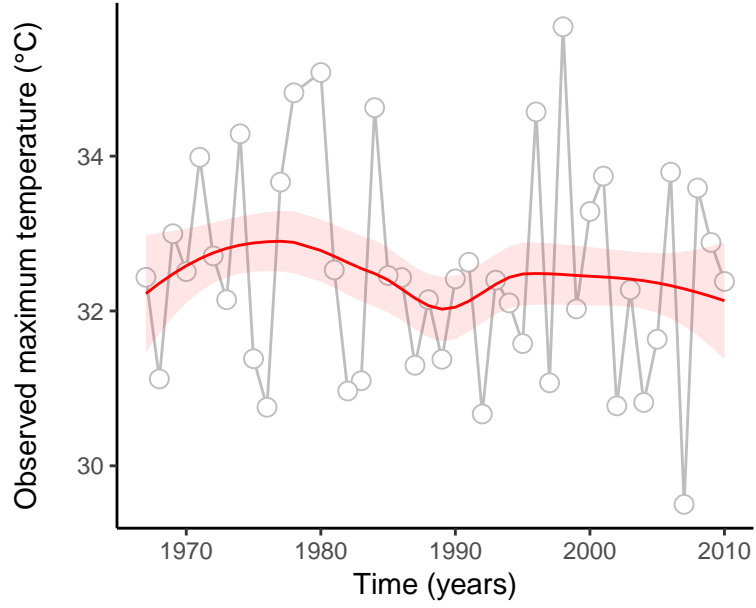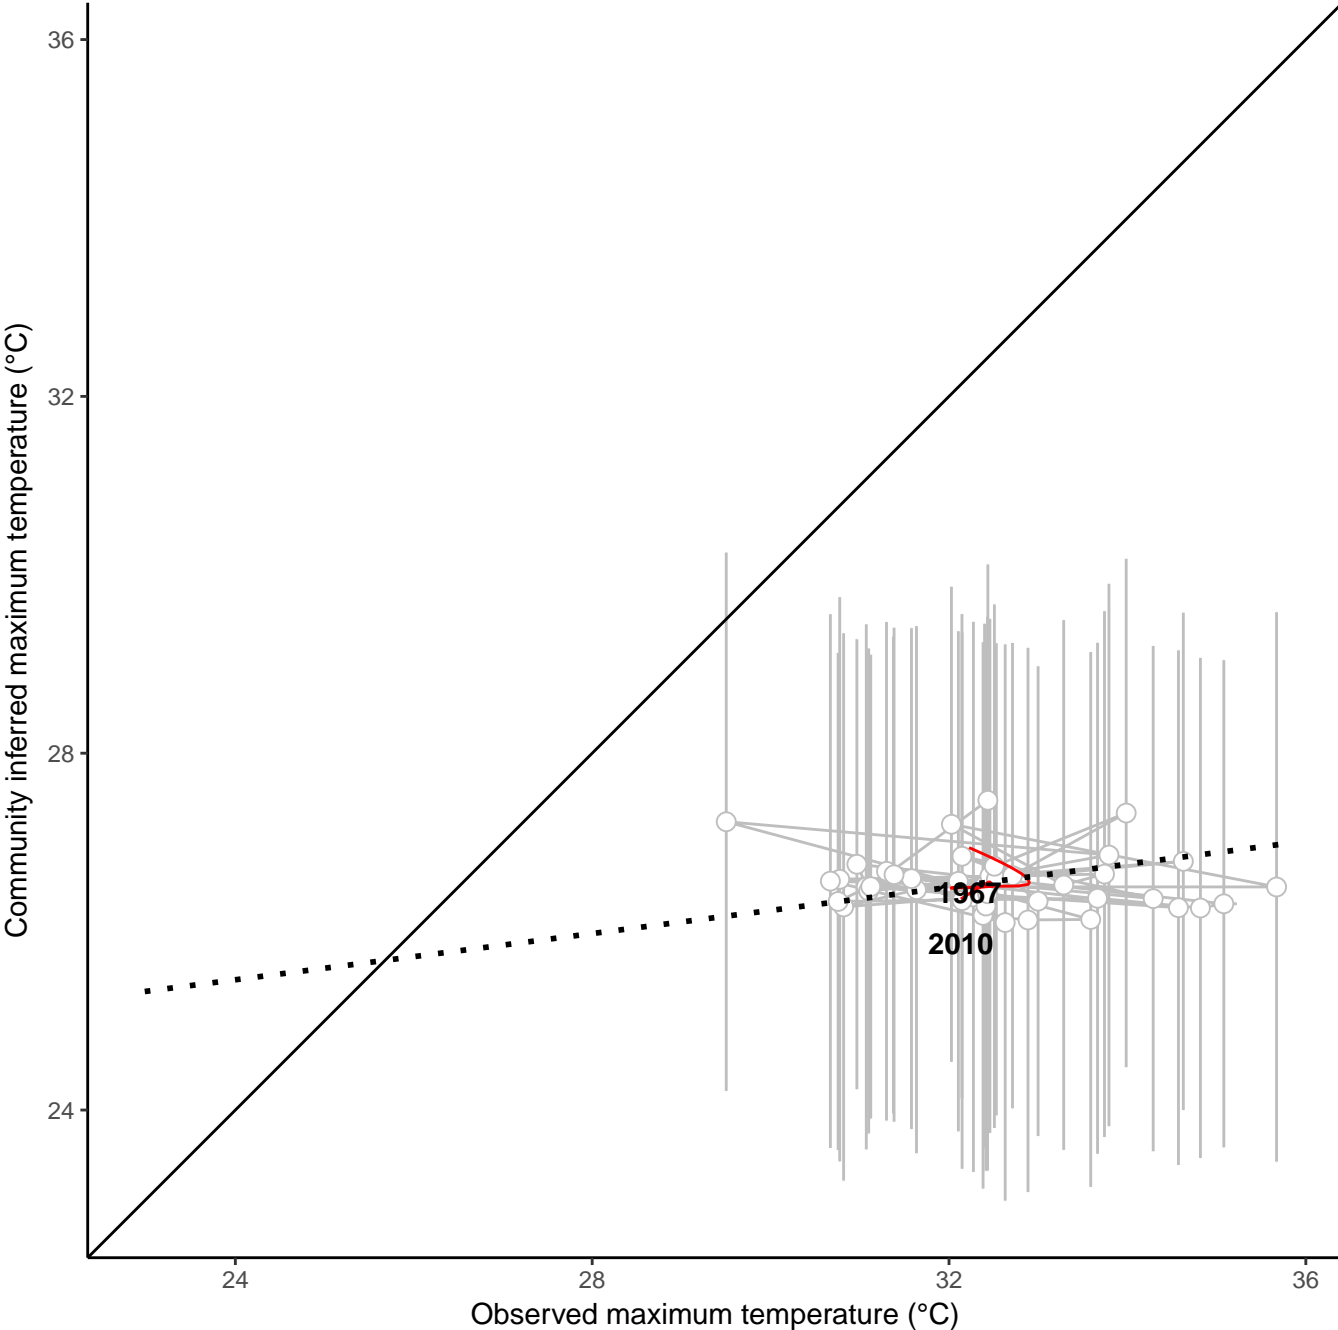

site : 840\_25\_11

absolute deviation = 4.69 | deviation change = -0.06 | maximum state number = 2

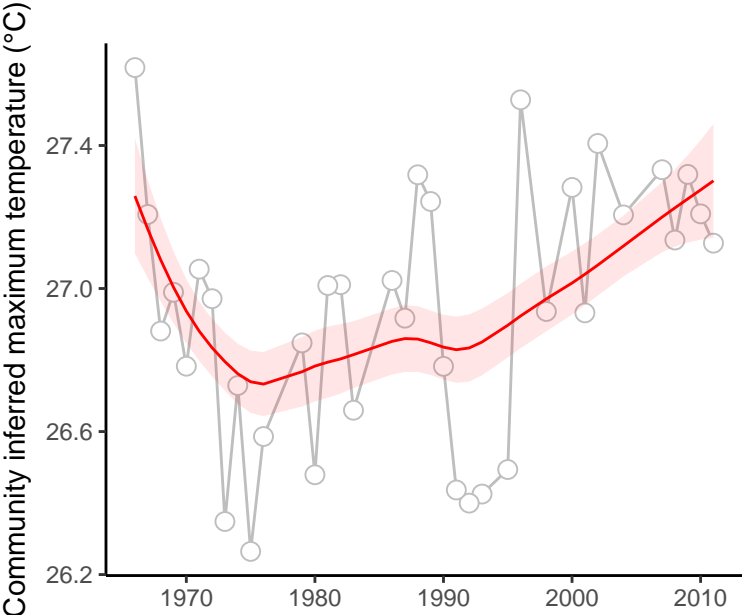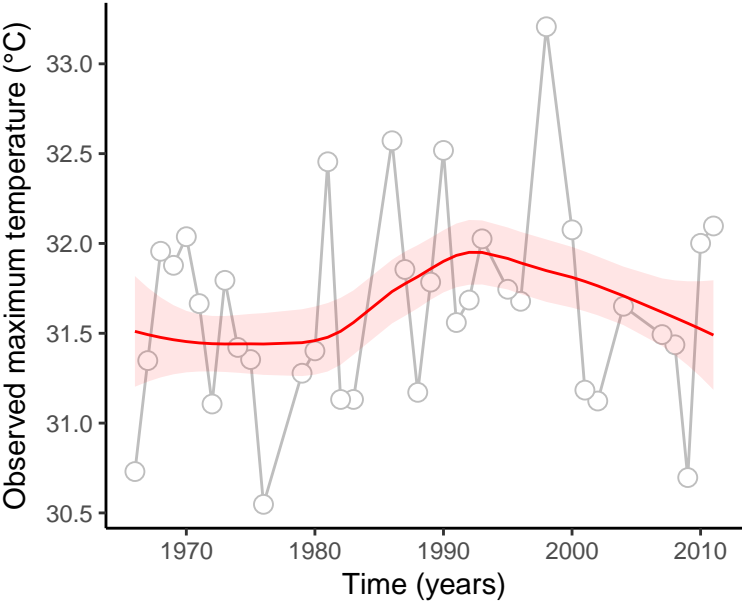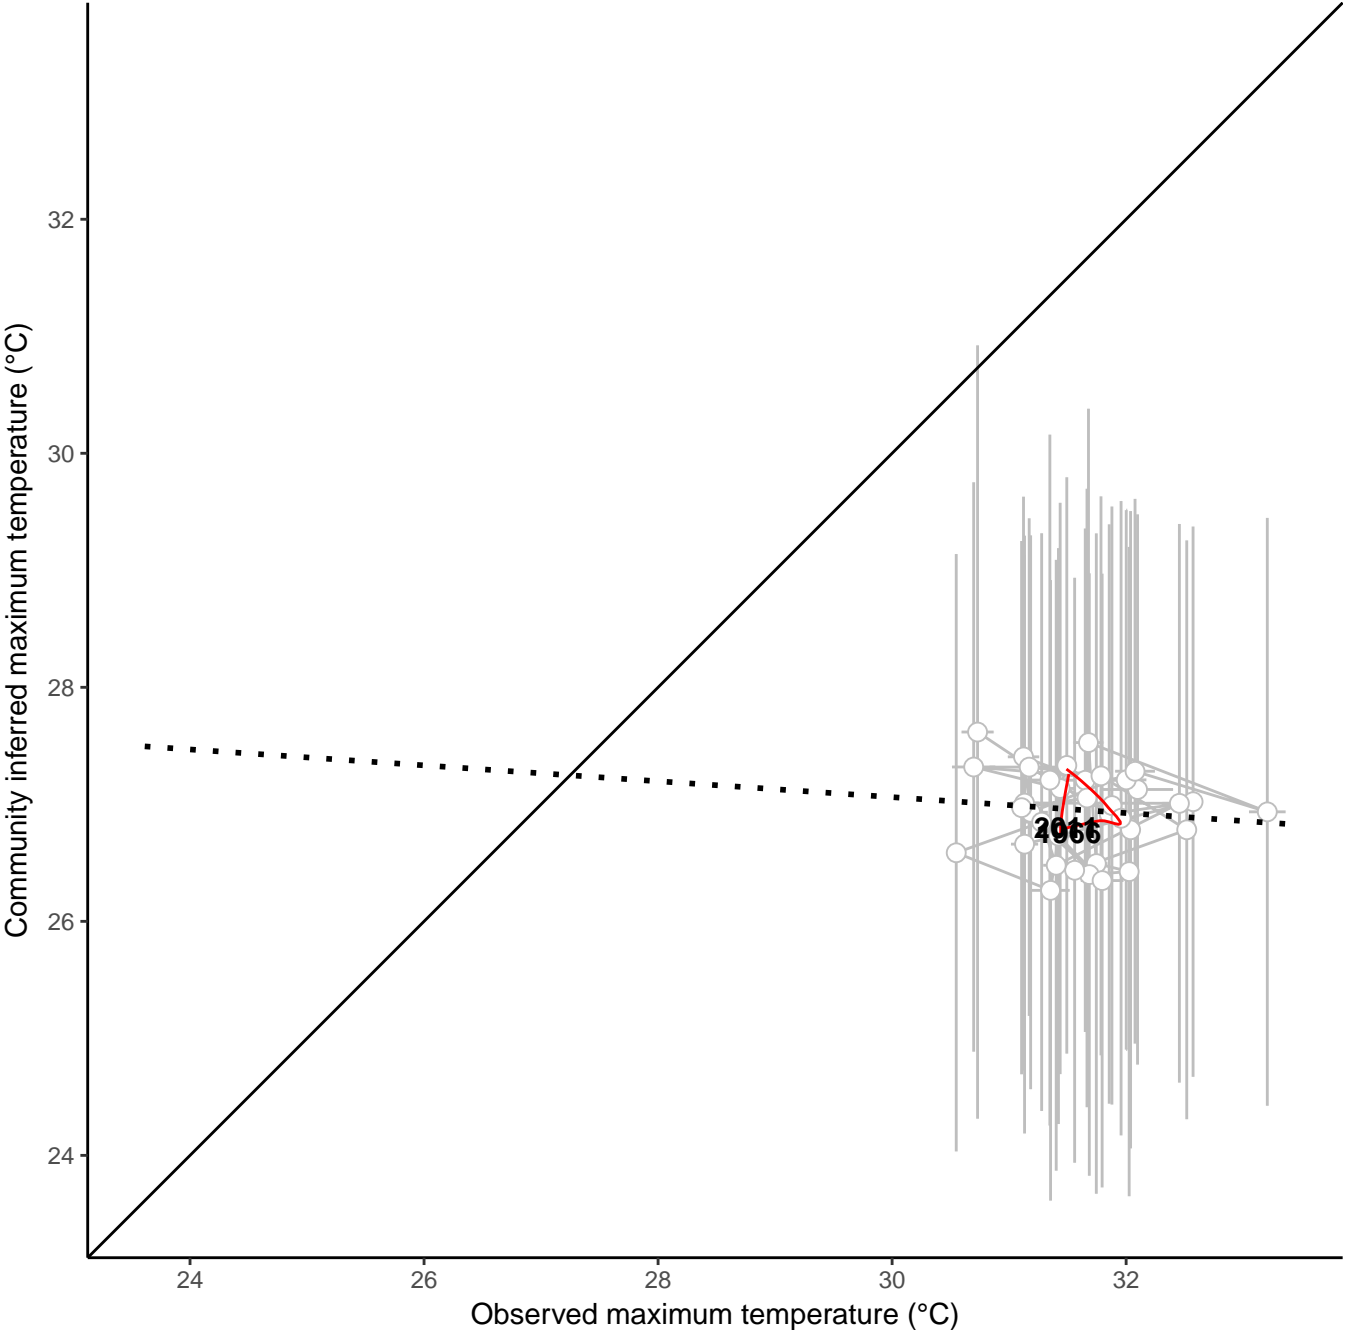



site : 840\_34\_14

absolute deviation = 2.44 | deviation change = 0.34 | maximum state number = 1

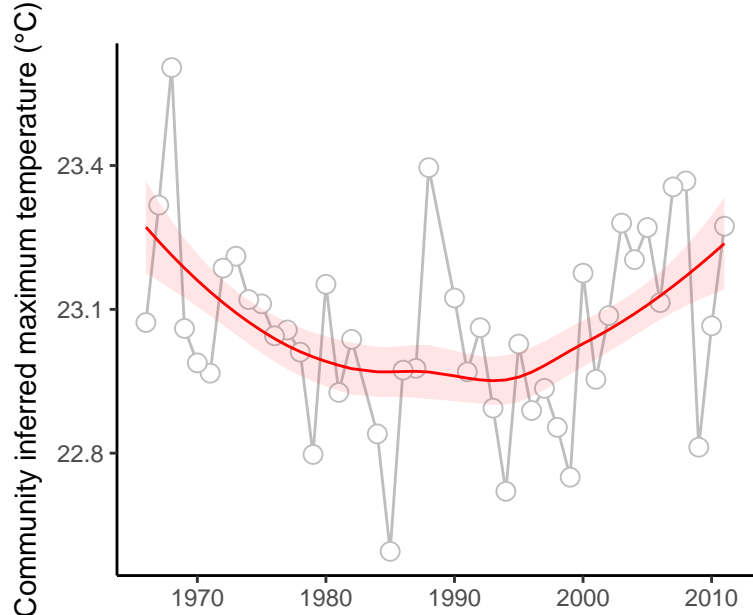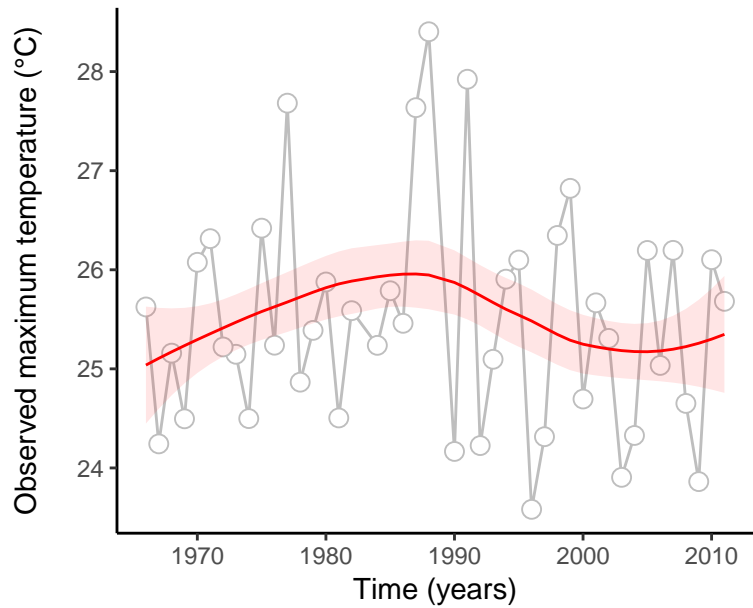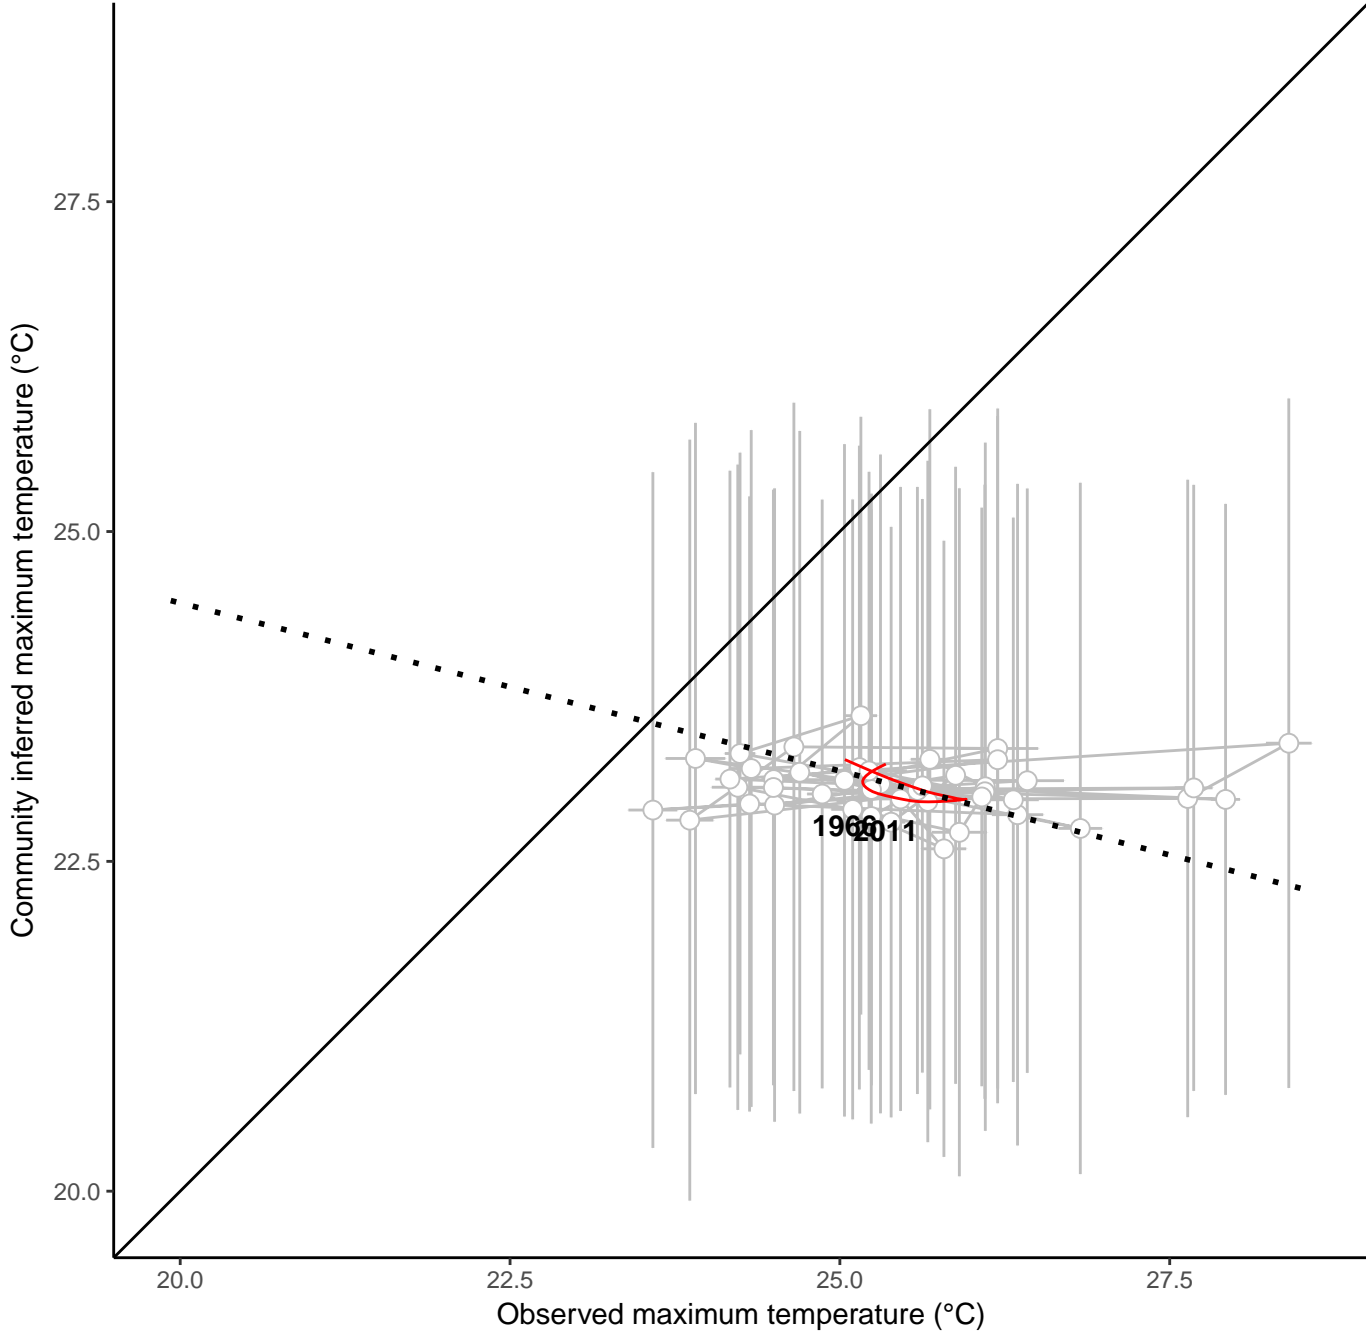

site : 840\_34\_56

absolute deviation = 3.77 | deviation change = 0.55 | maximum state number = 1

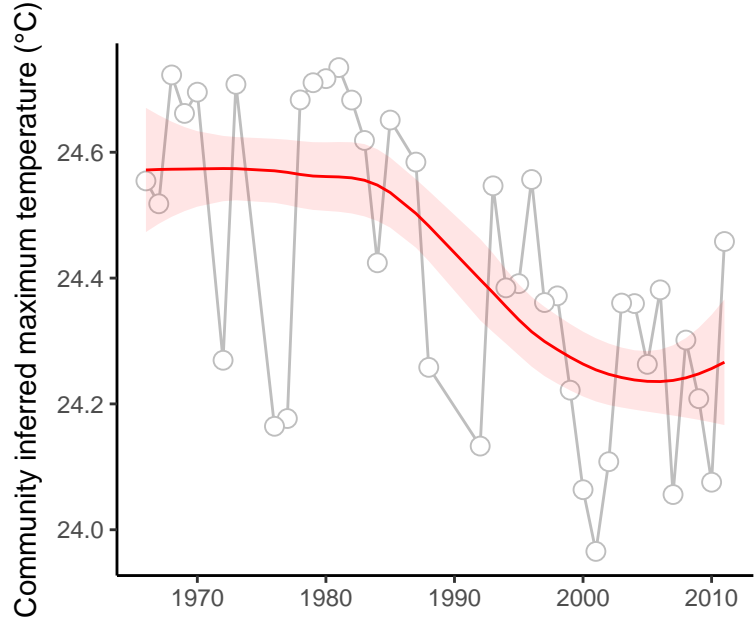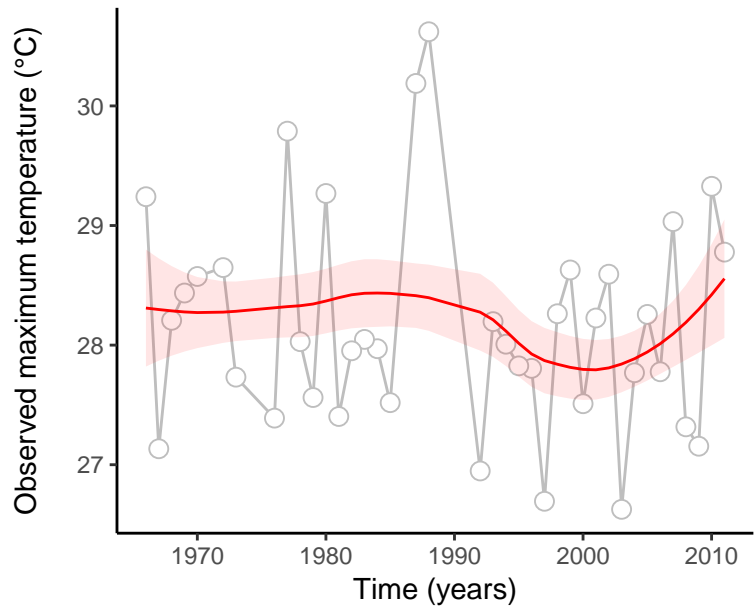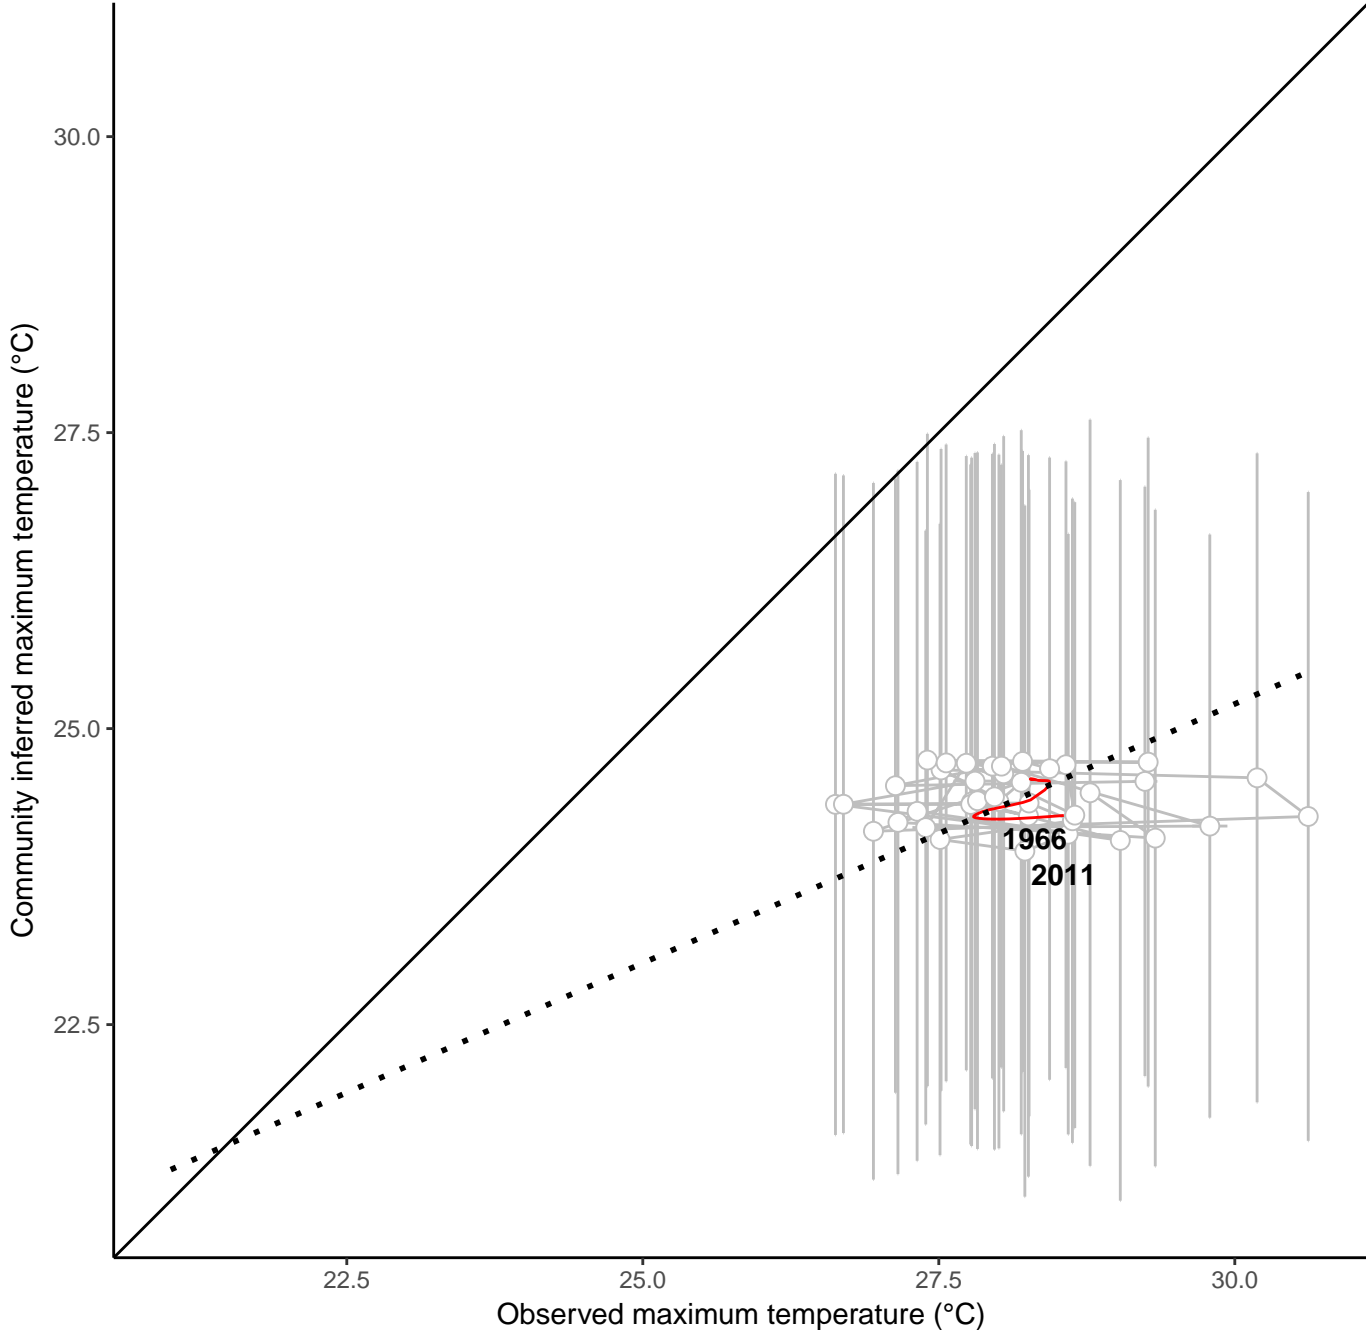

site : 840\_53\_27

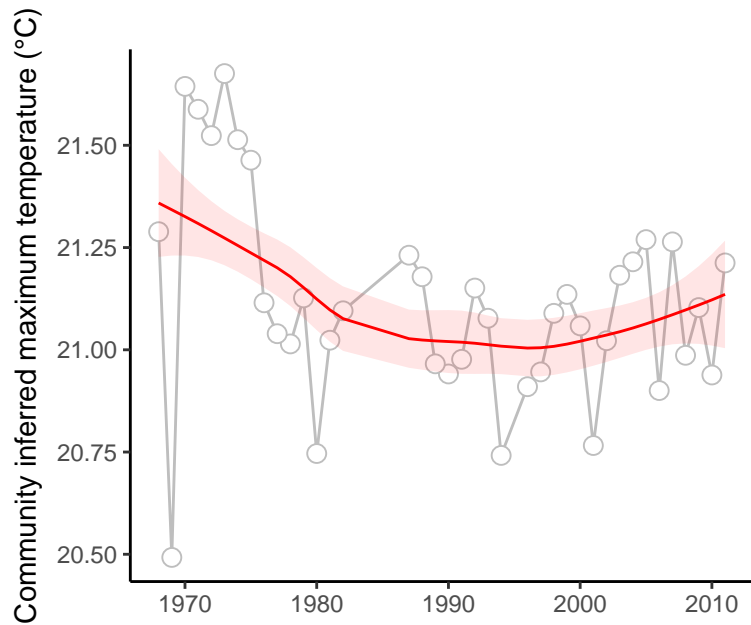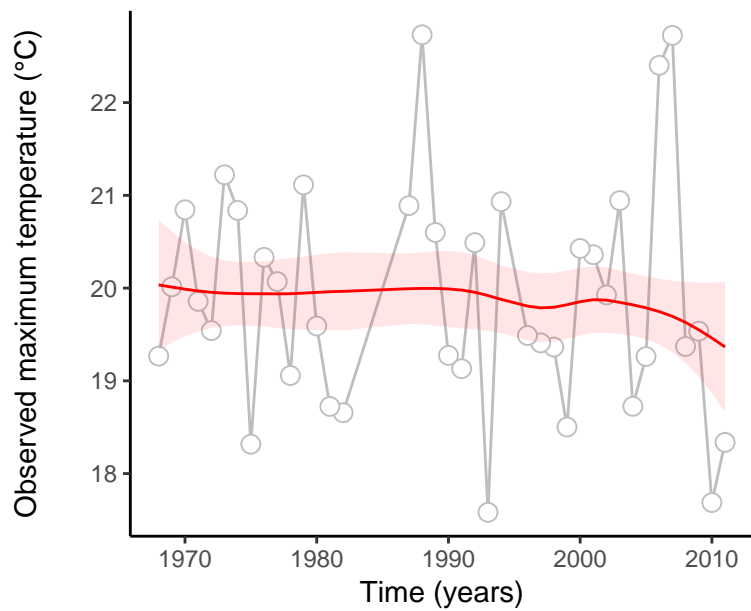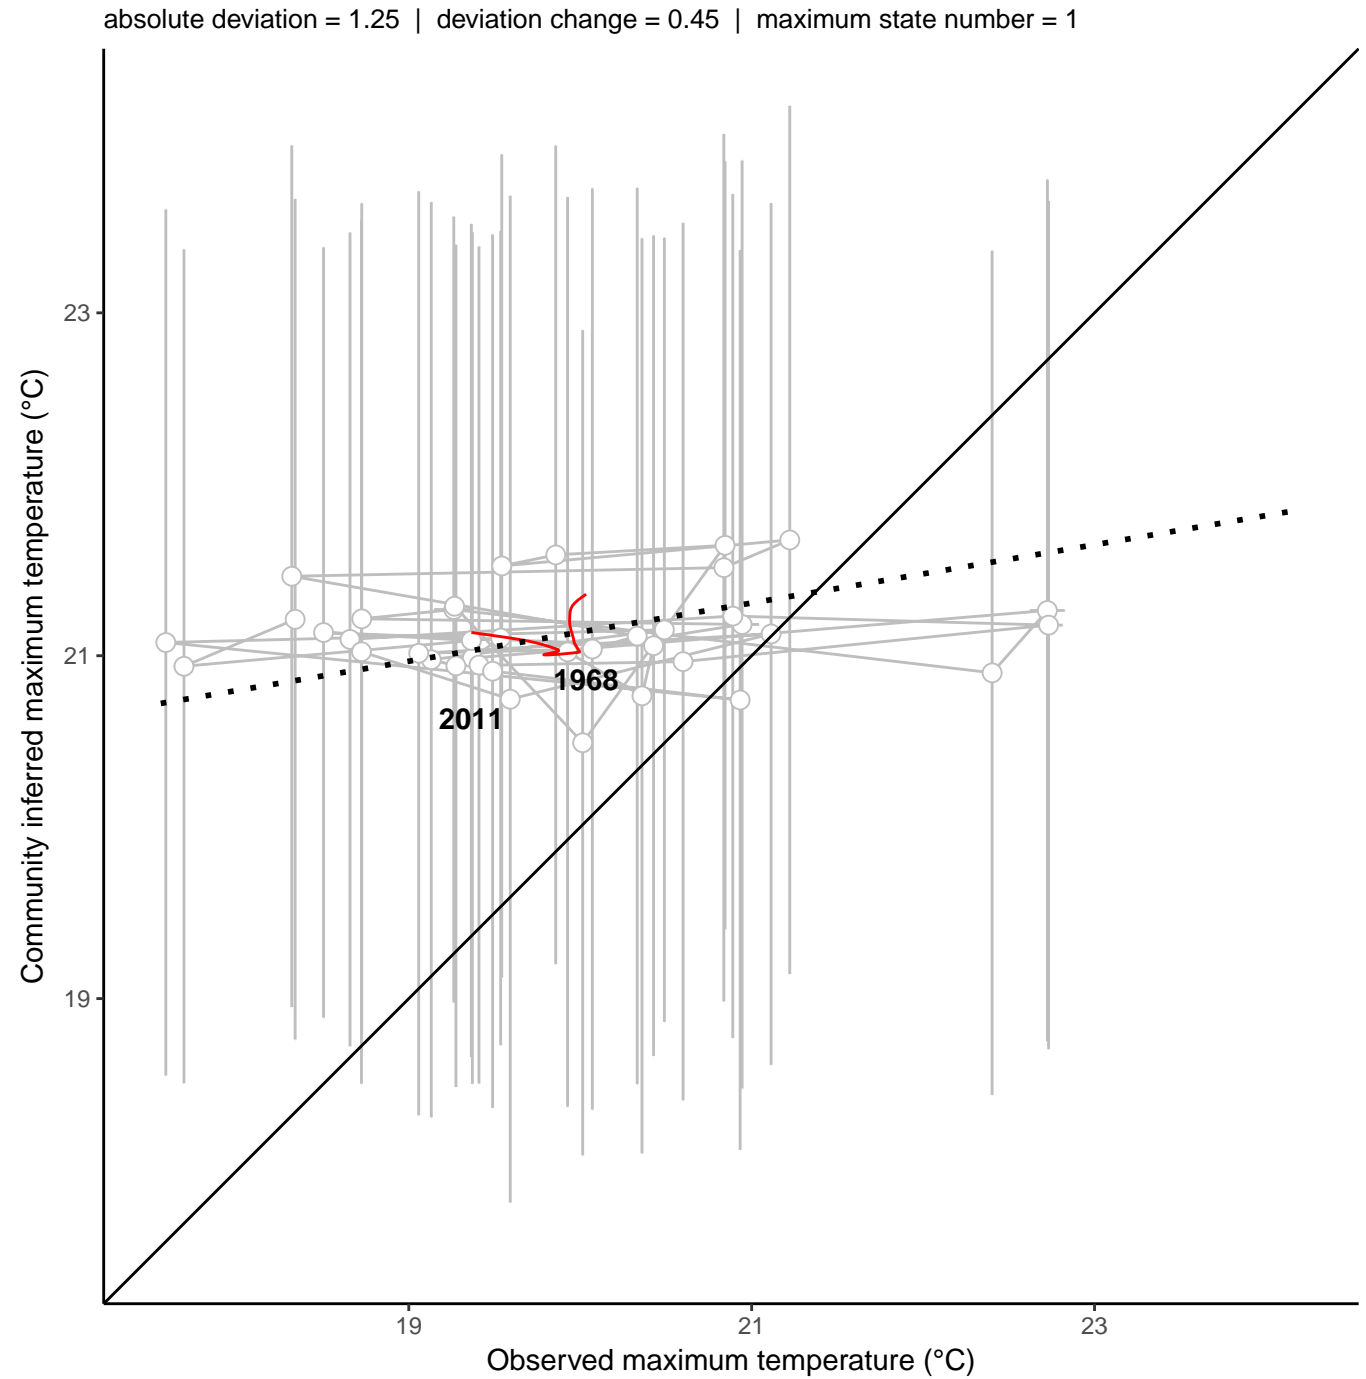

site : 840\_58\_4

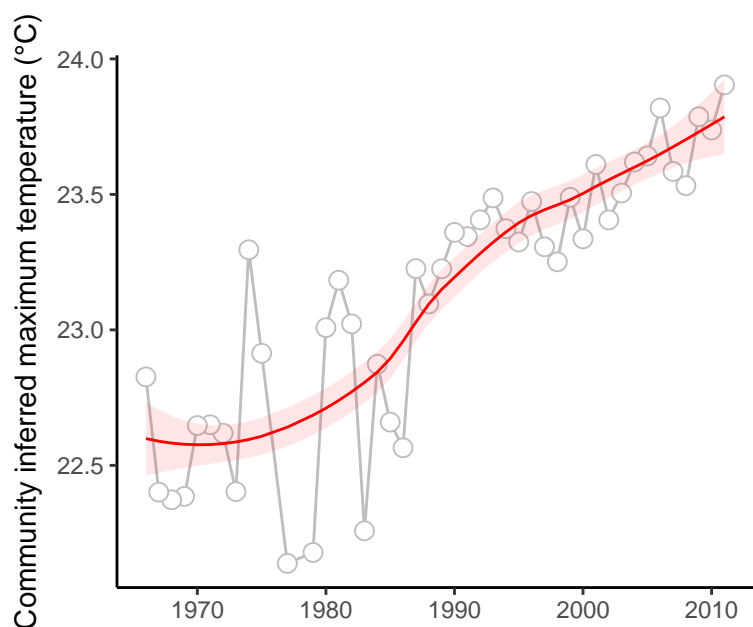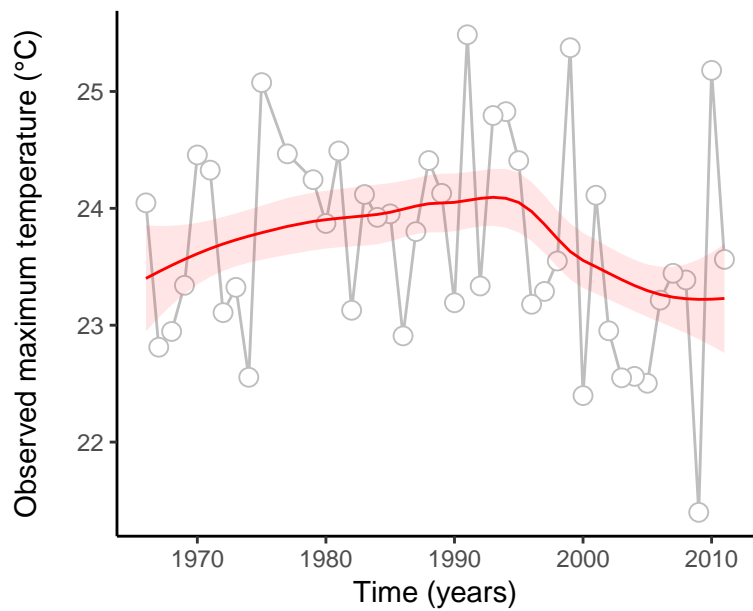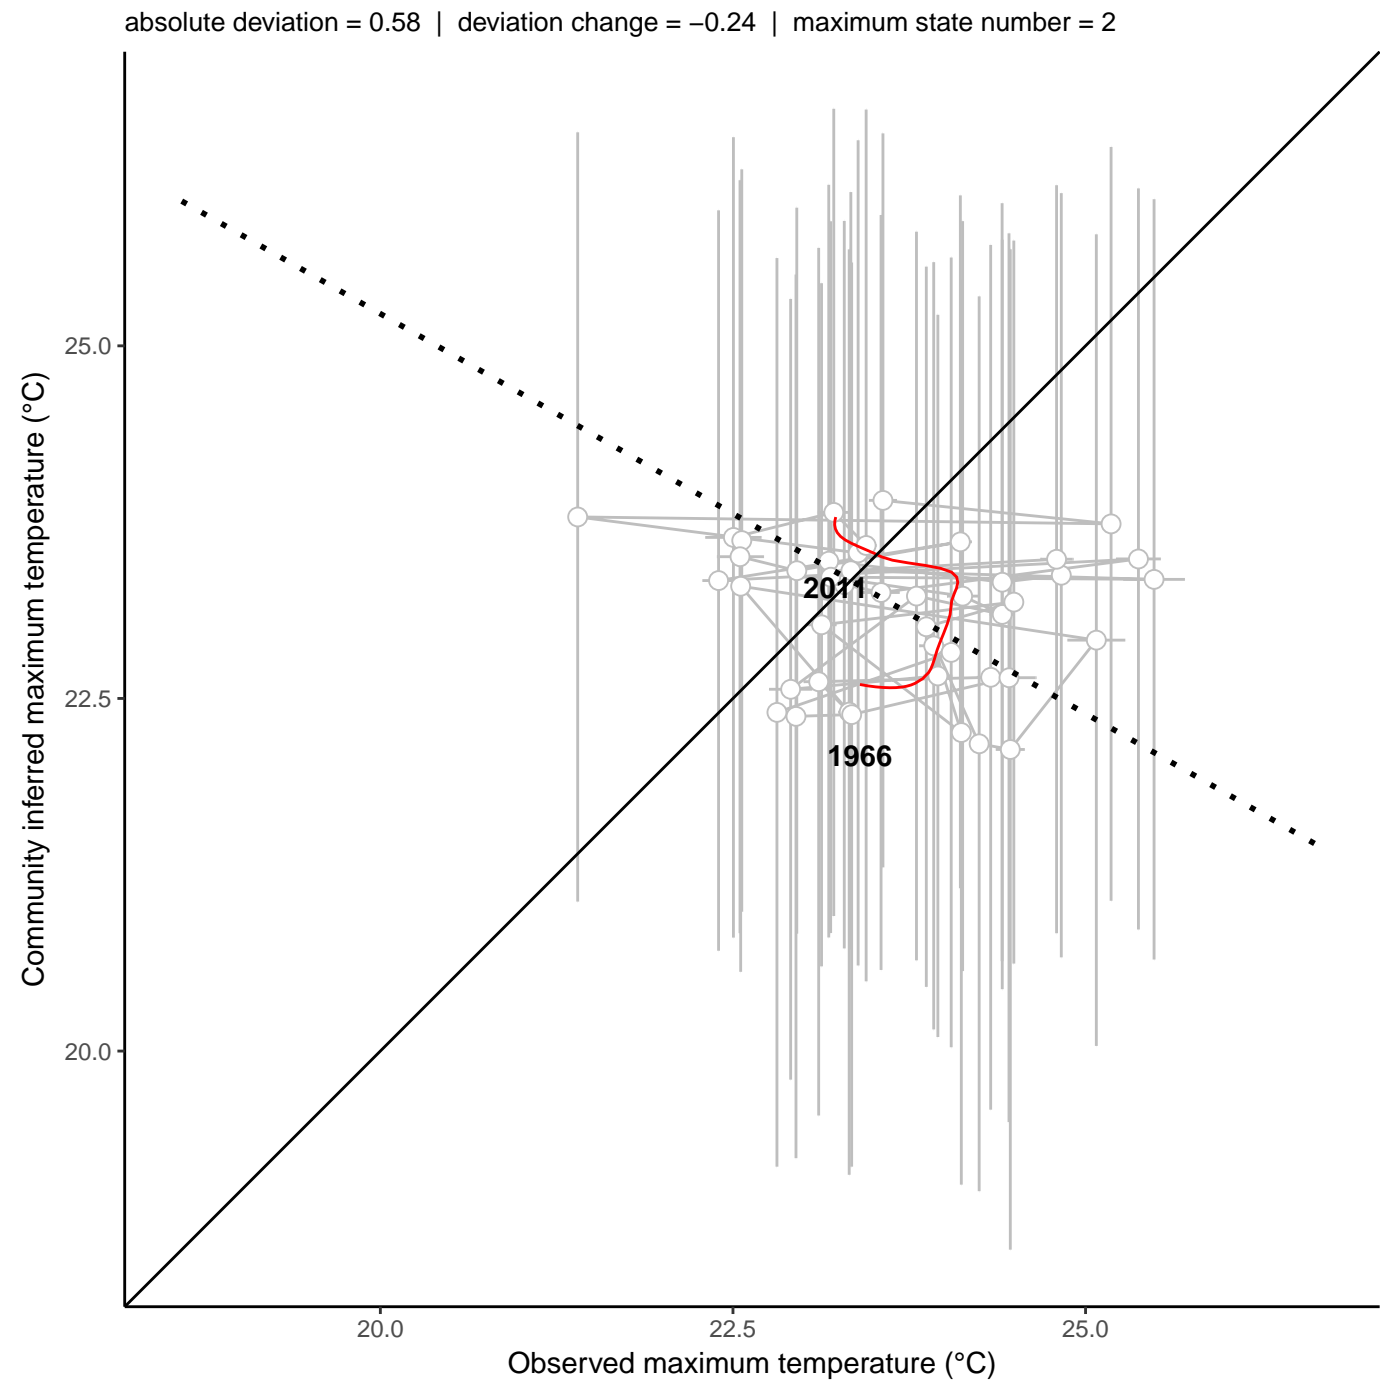

site : 840\_63\_24

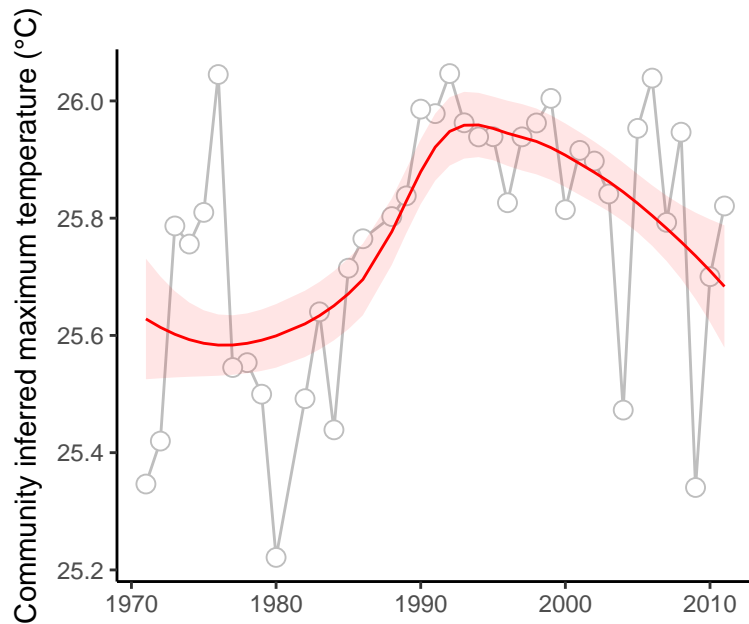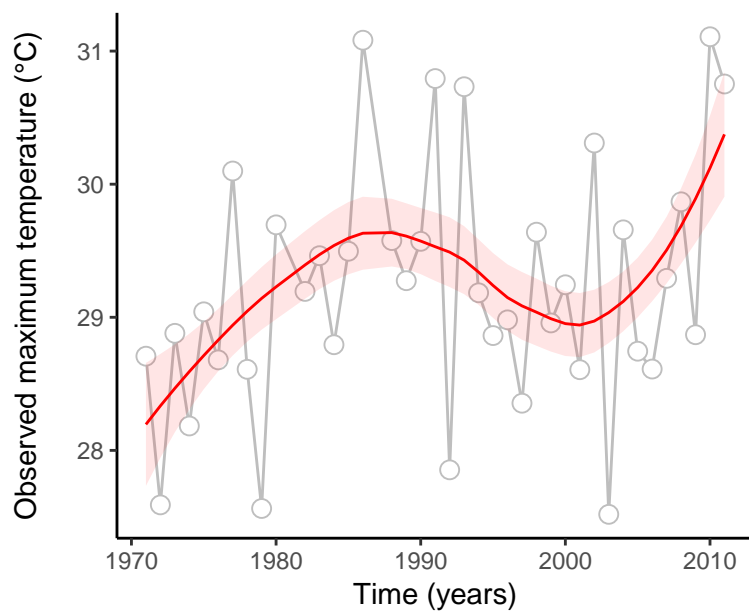

absolute deviation = 3.47 | deviation change = 2.12 | maximum state number = 1

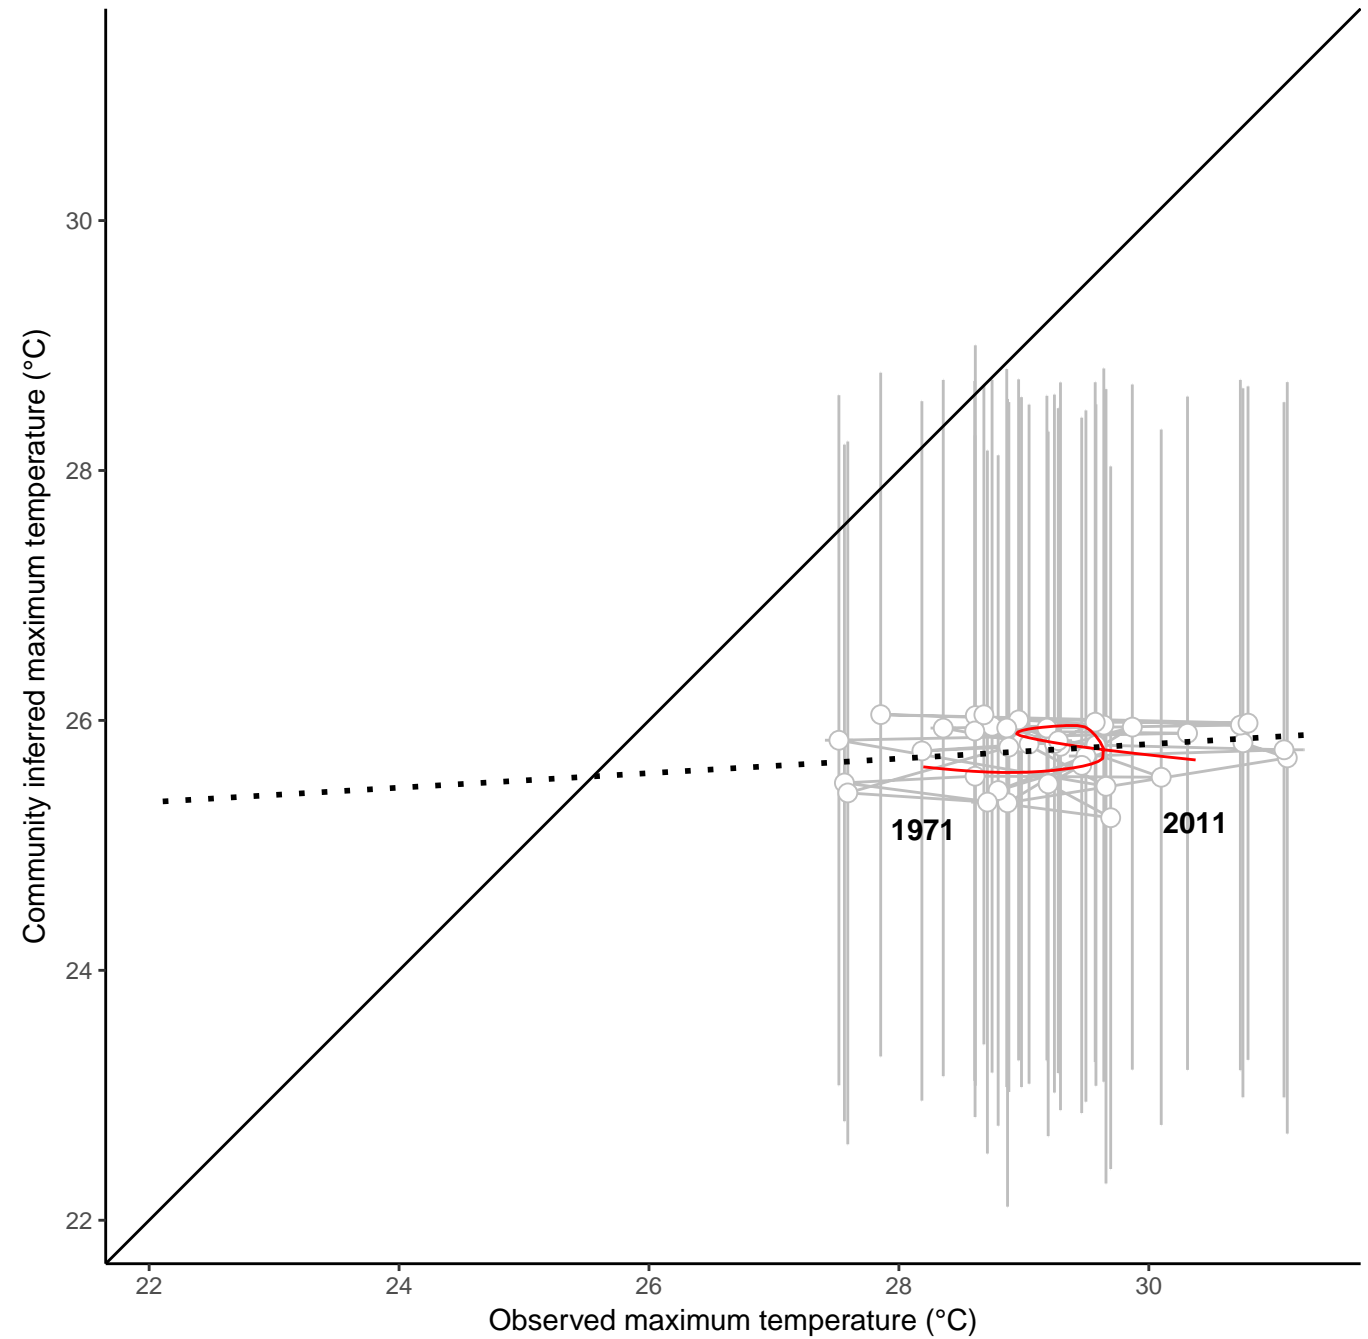

site : 840\_72\_71

absolute deviation = 0.78 | deviation change = 1.09 | maximum state number = 1

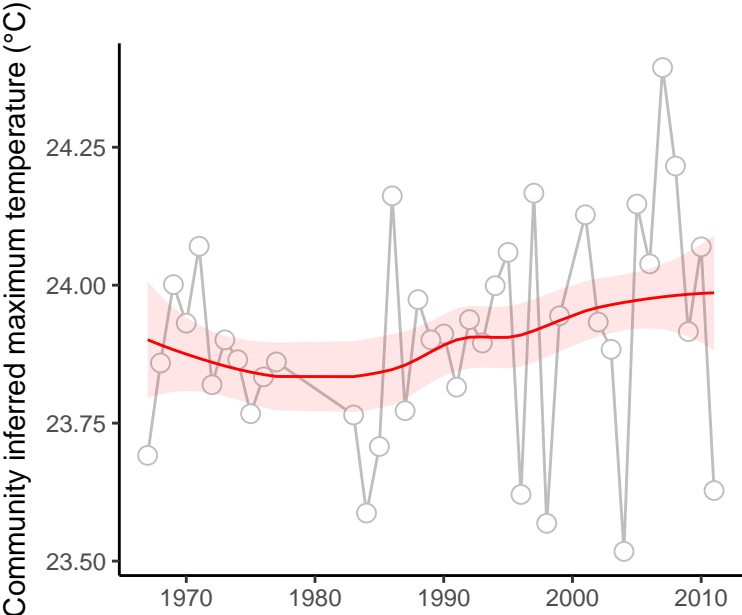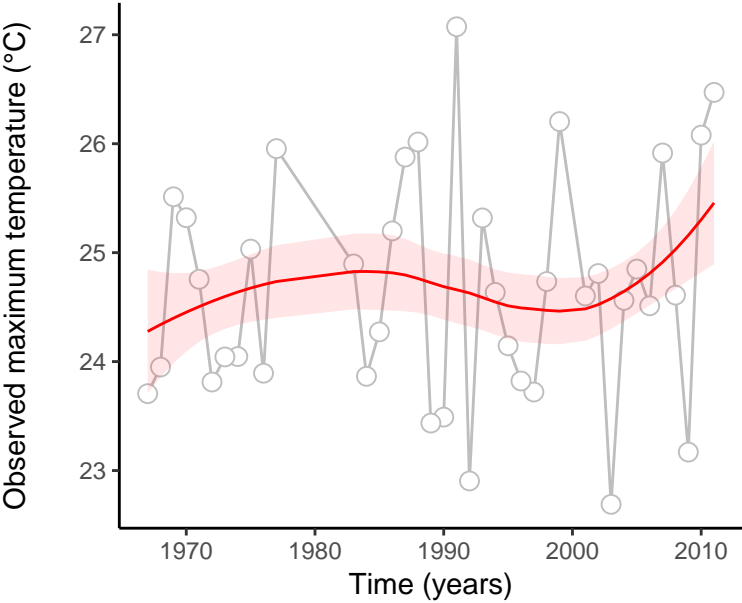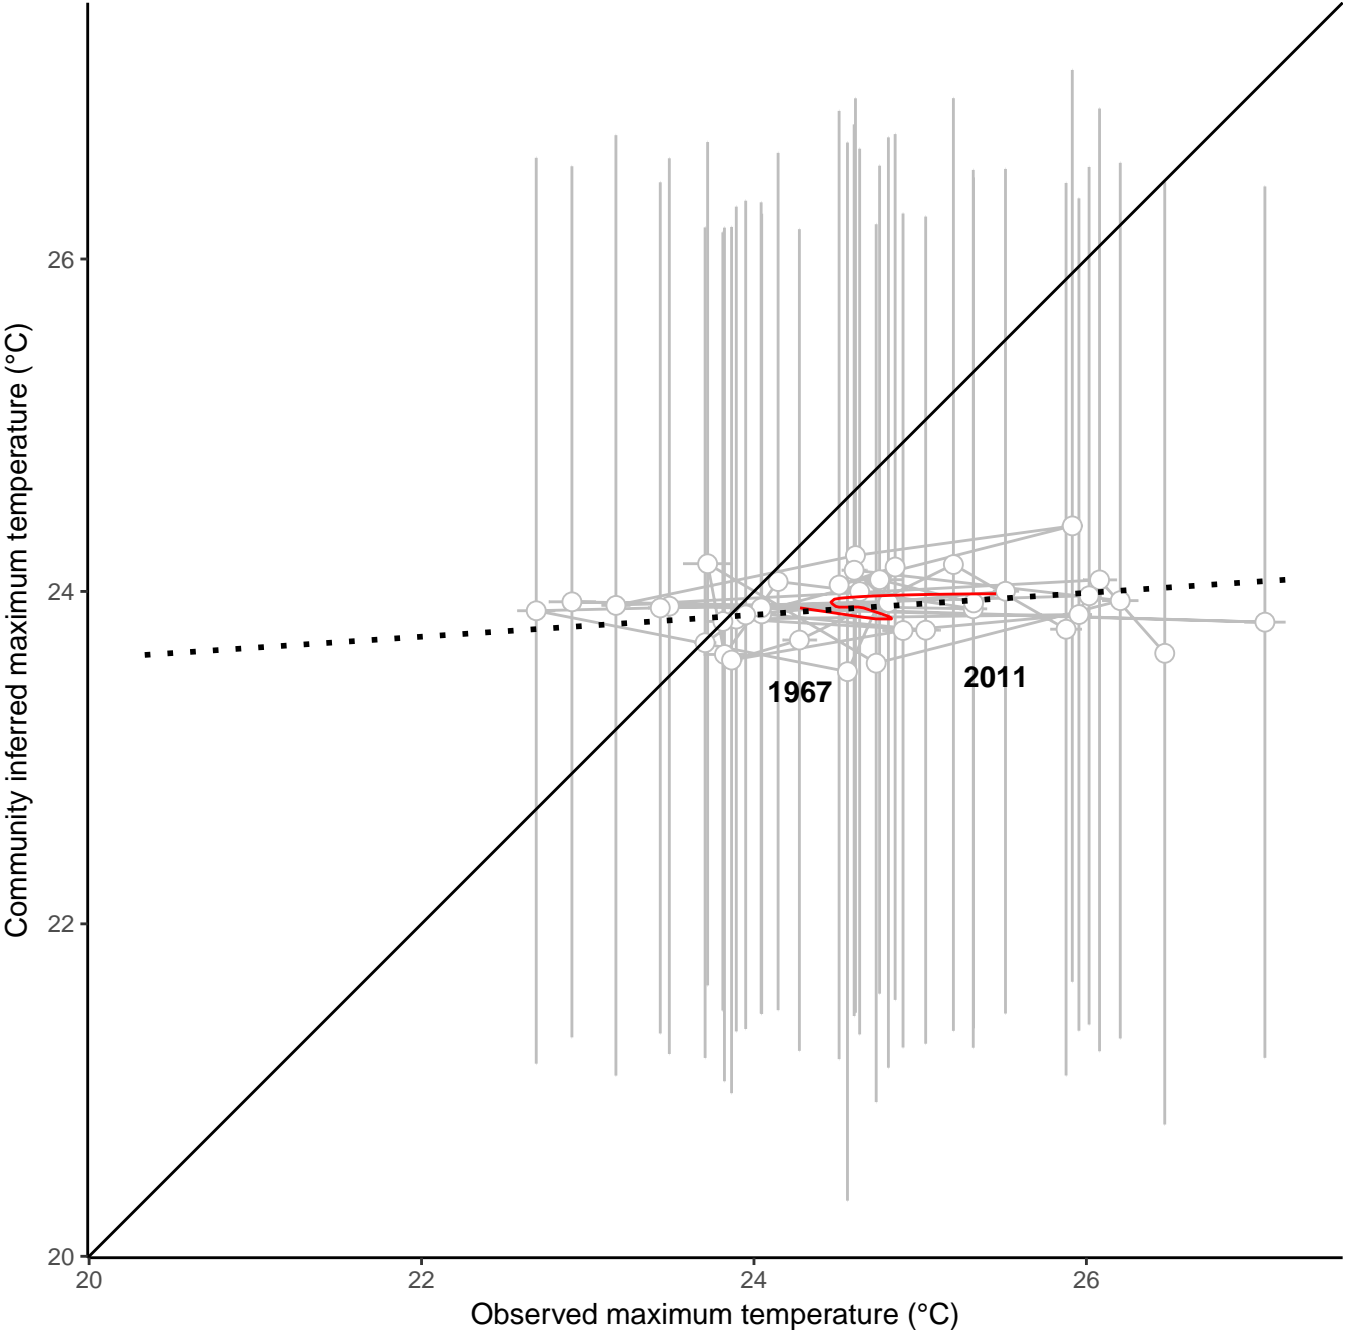

site : 840\_72\_72

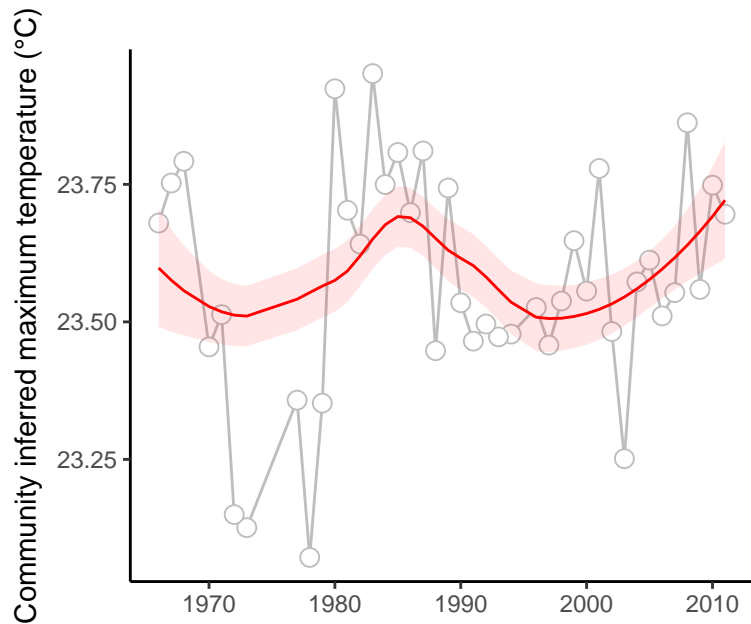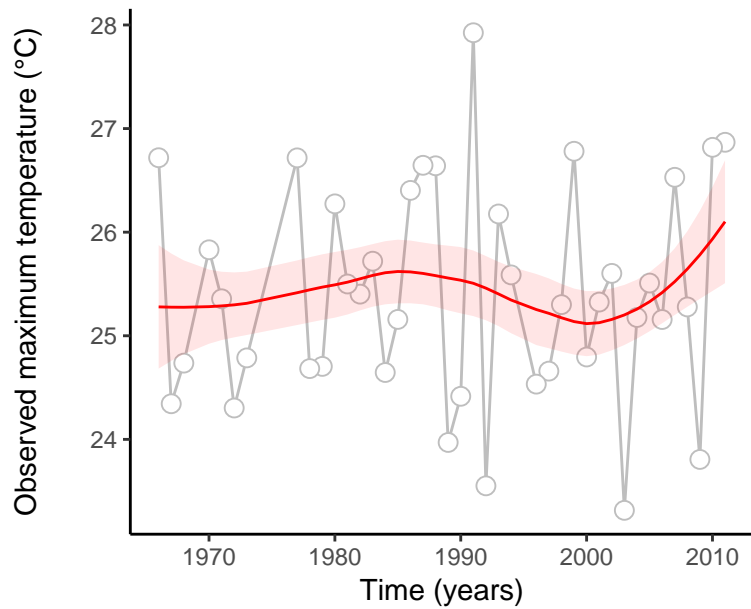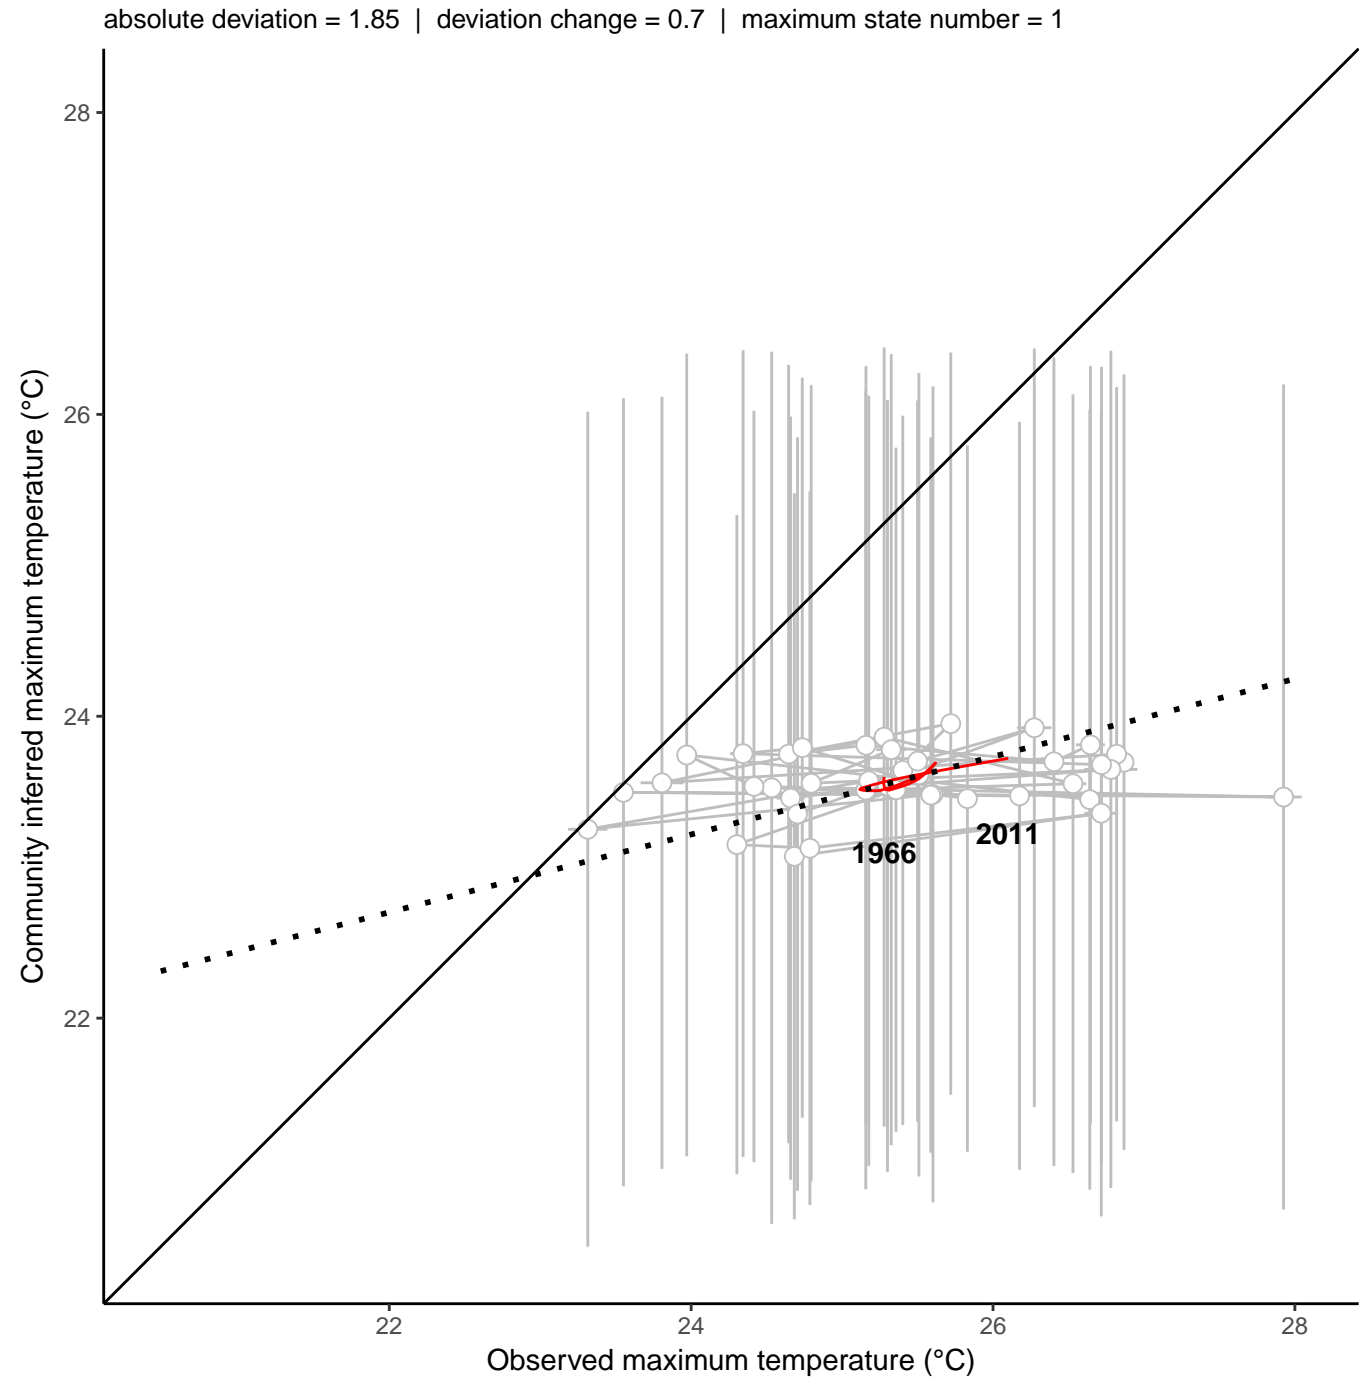

site : 840\_72\_85

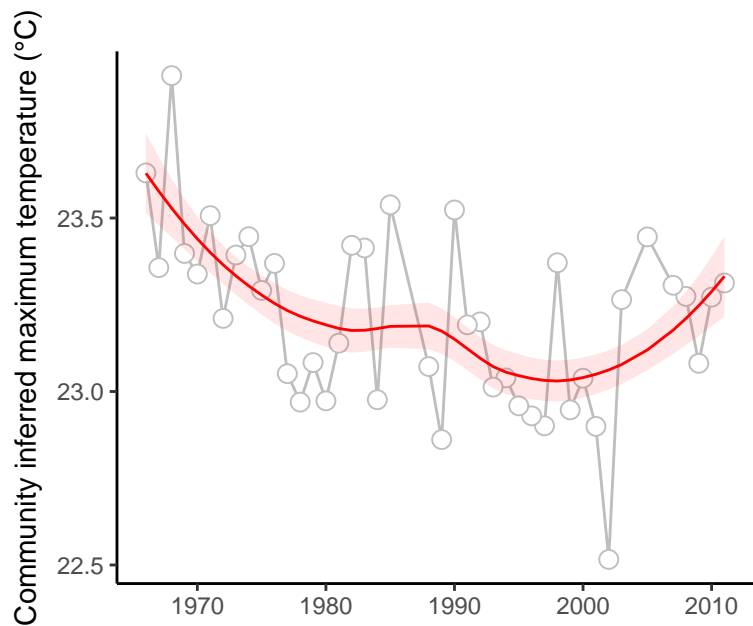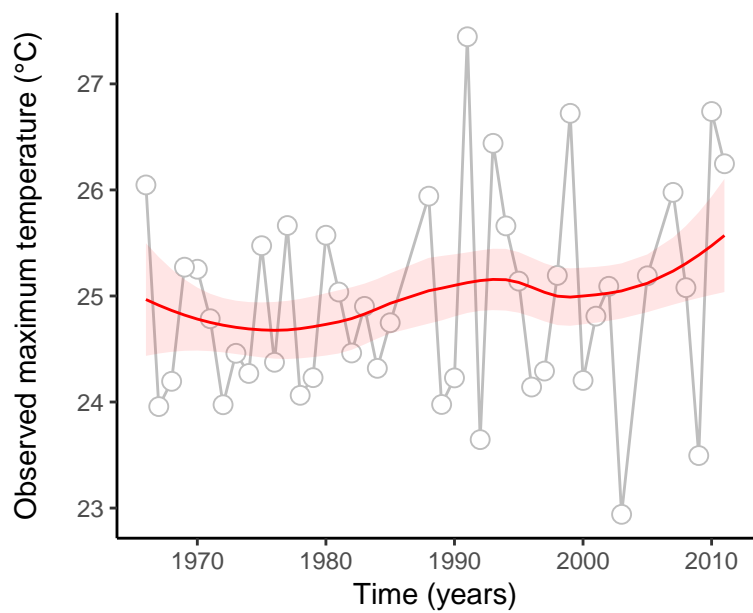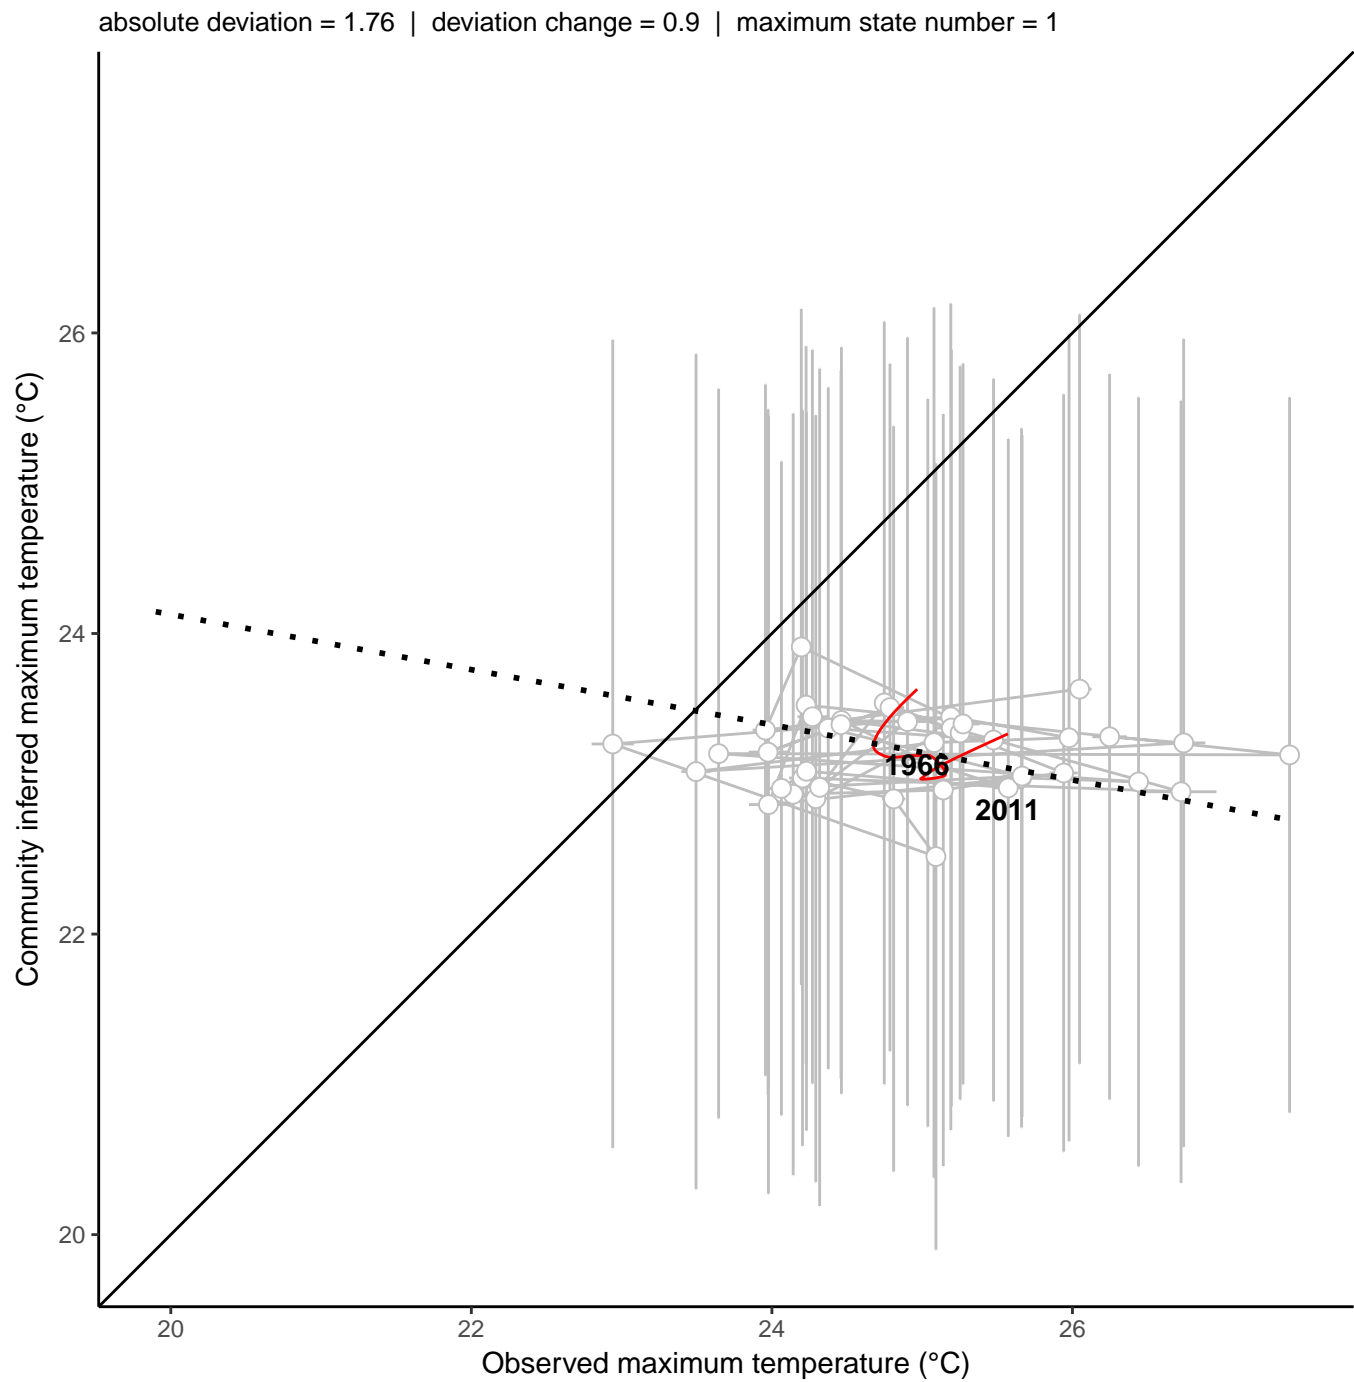



site : 840\_83\_24

absolute deviation = 4.91 | deviation change = 1.89 | maximum state number = 1

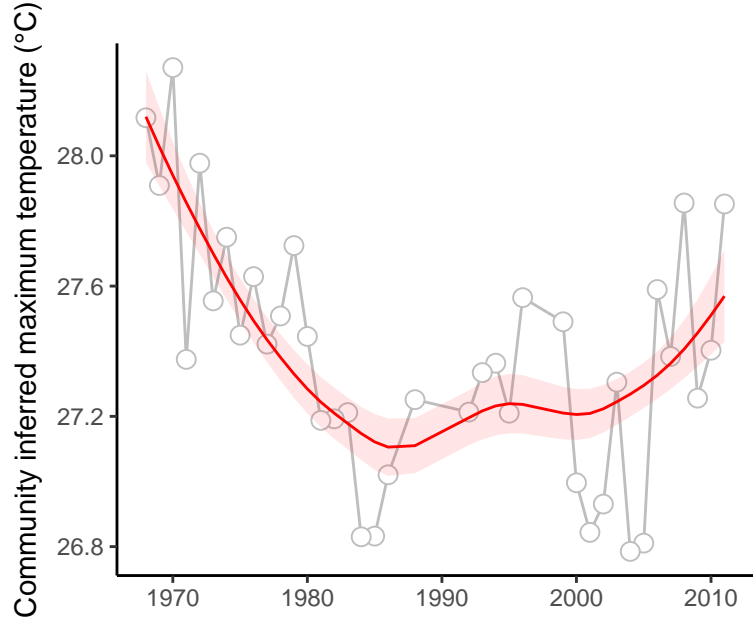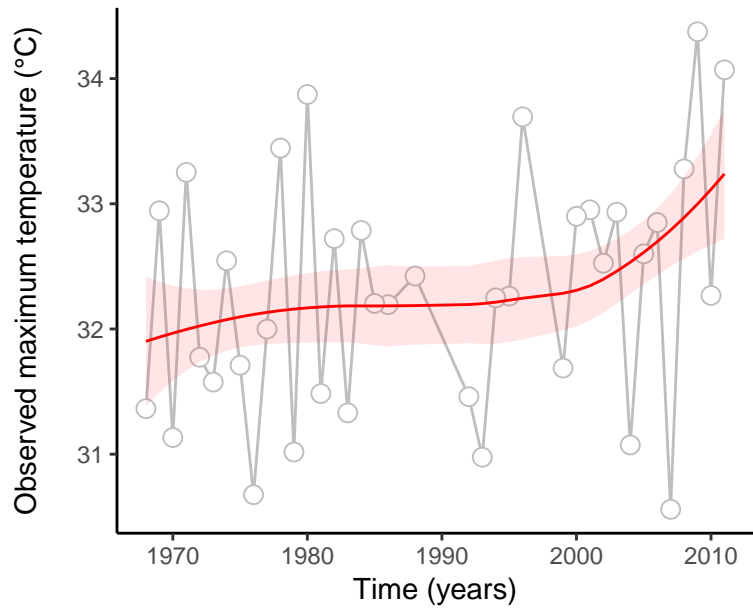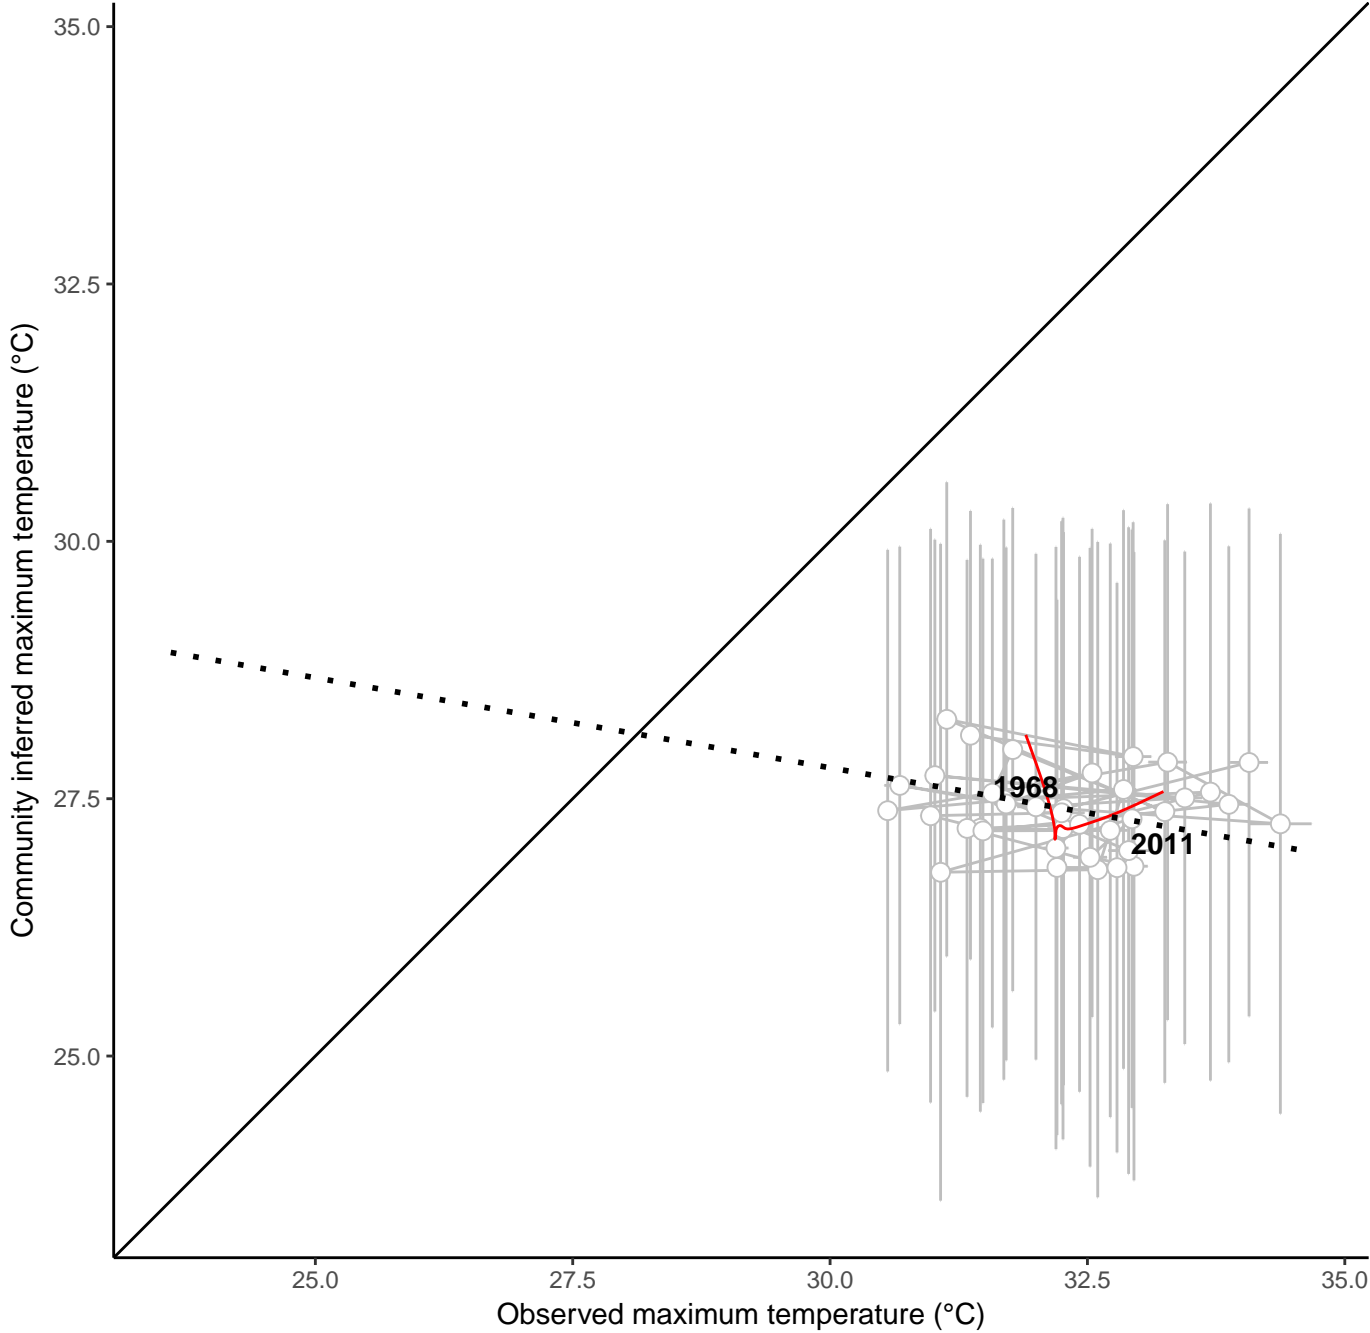

site : 840\_83\_28

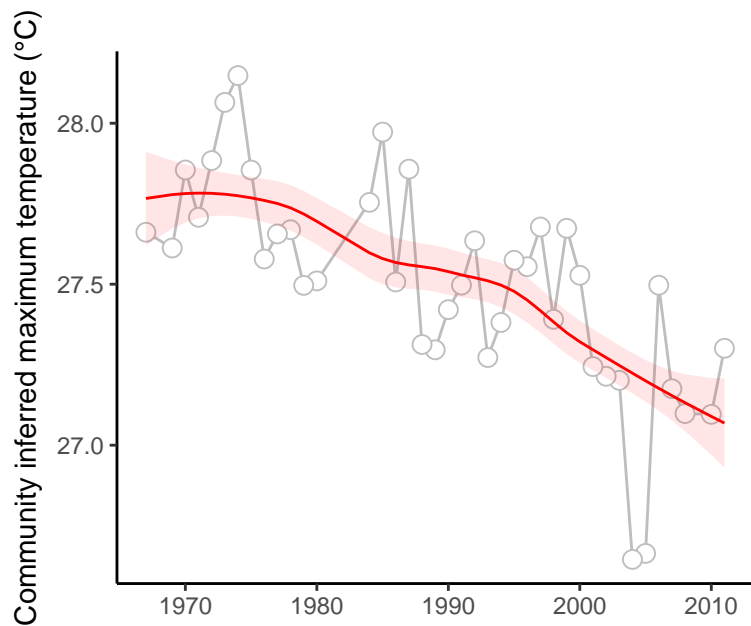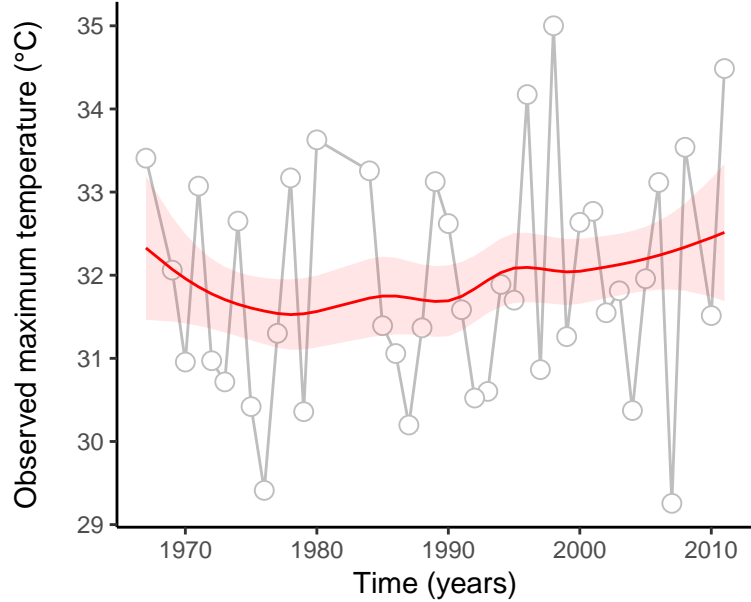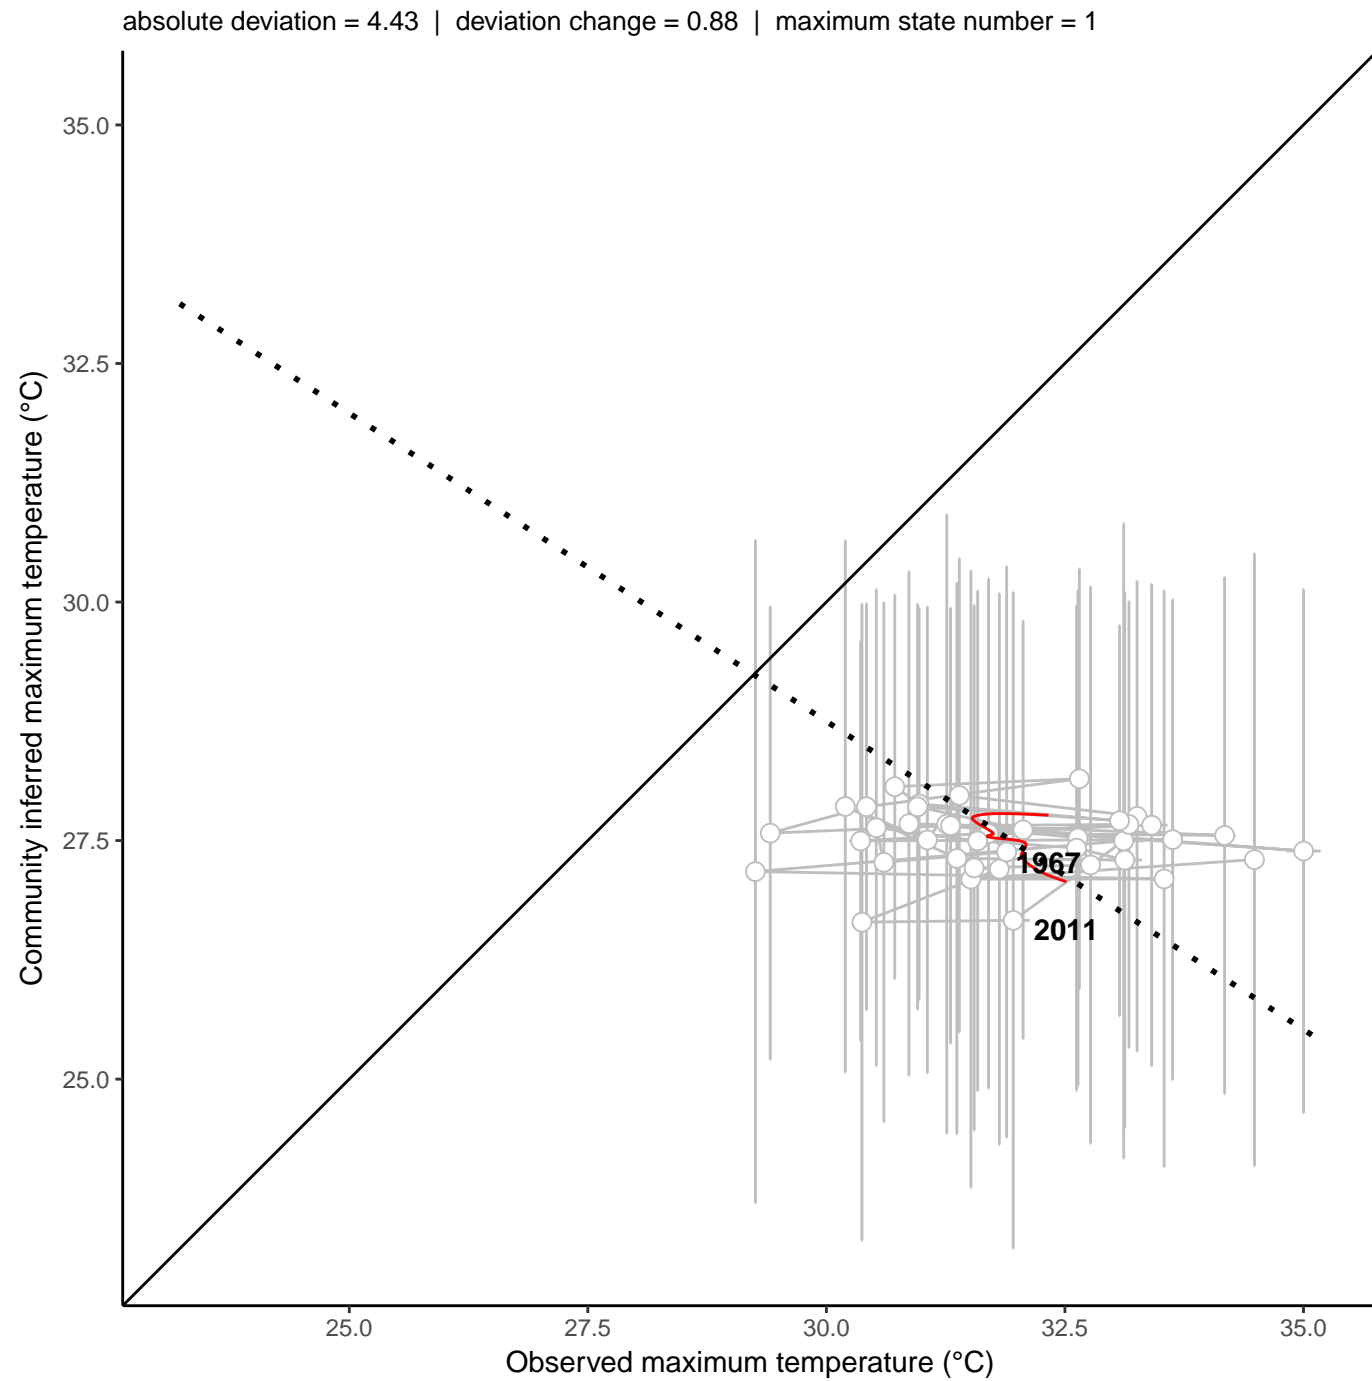

site : 840\_91\_47

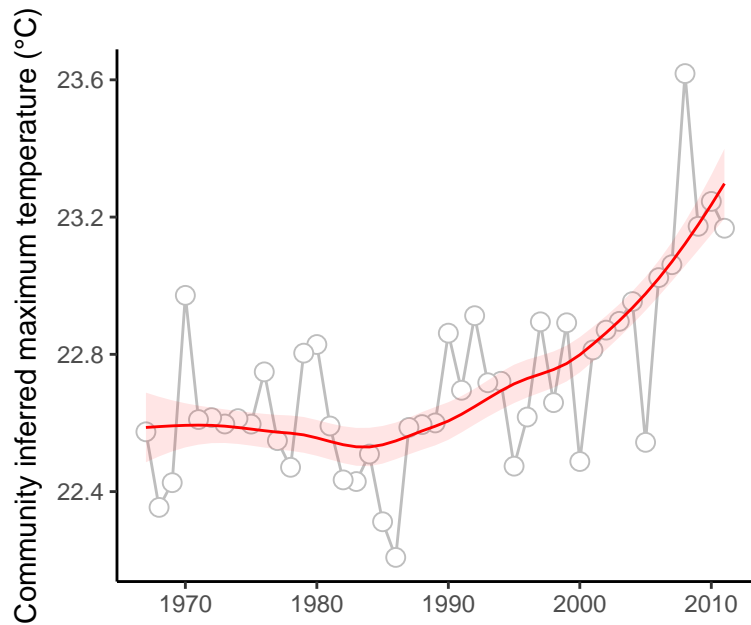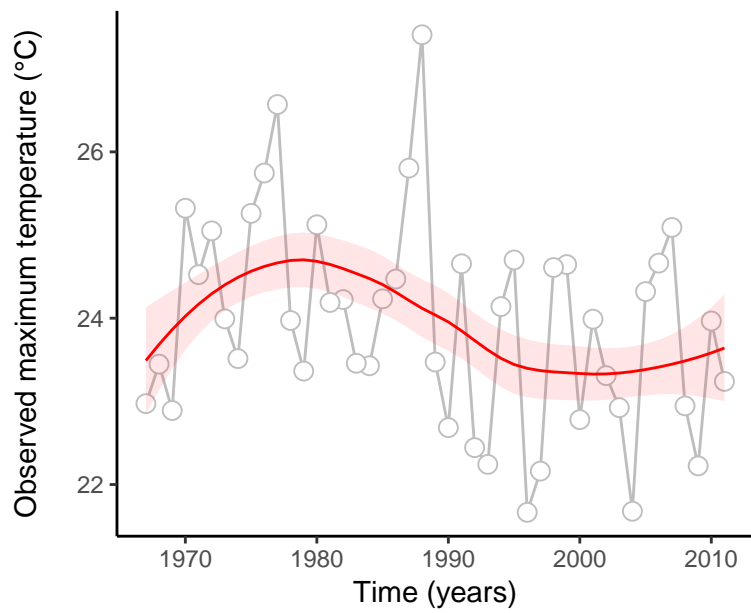

absolute deviation = 1.2 | deviation change = -0.56 | maximum state number = 1

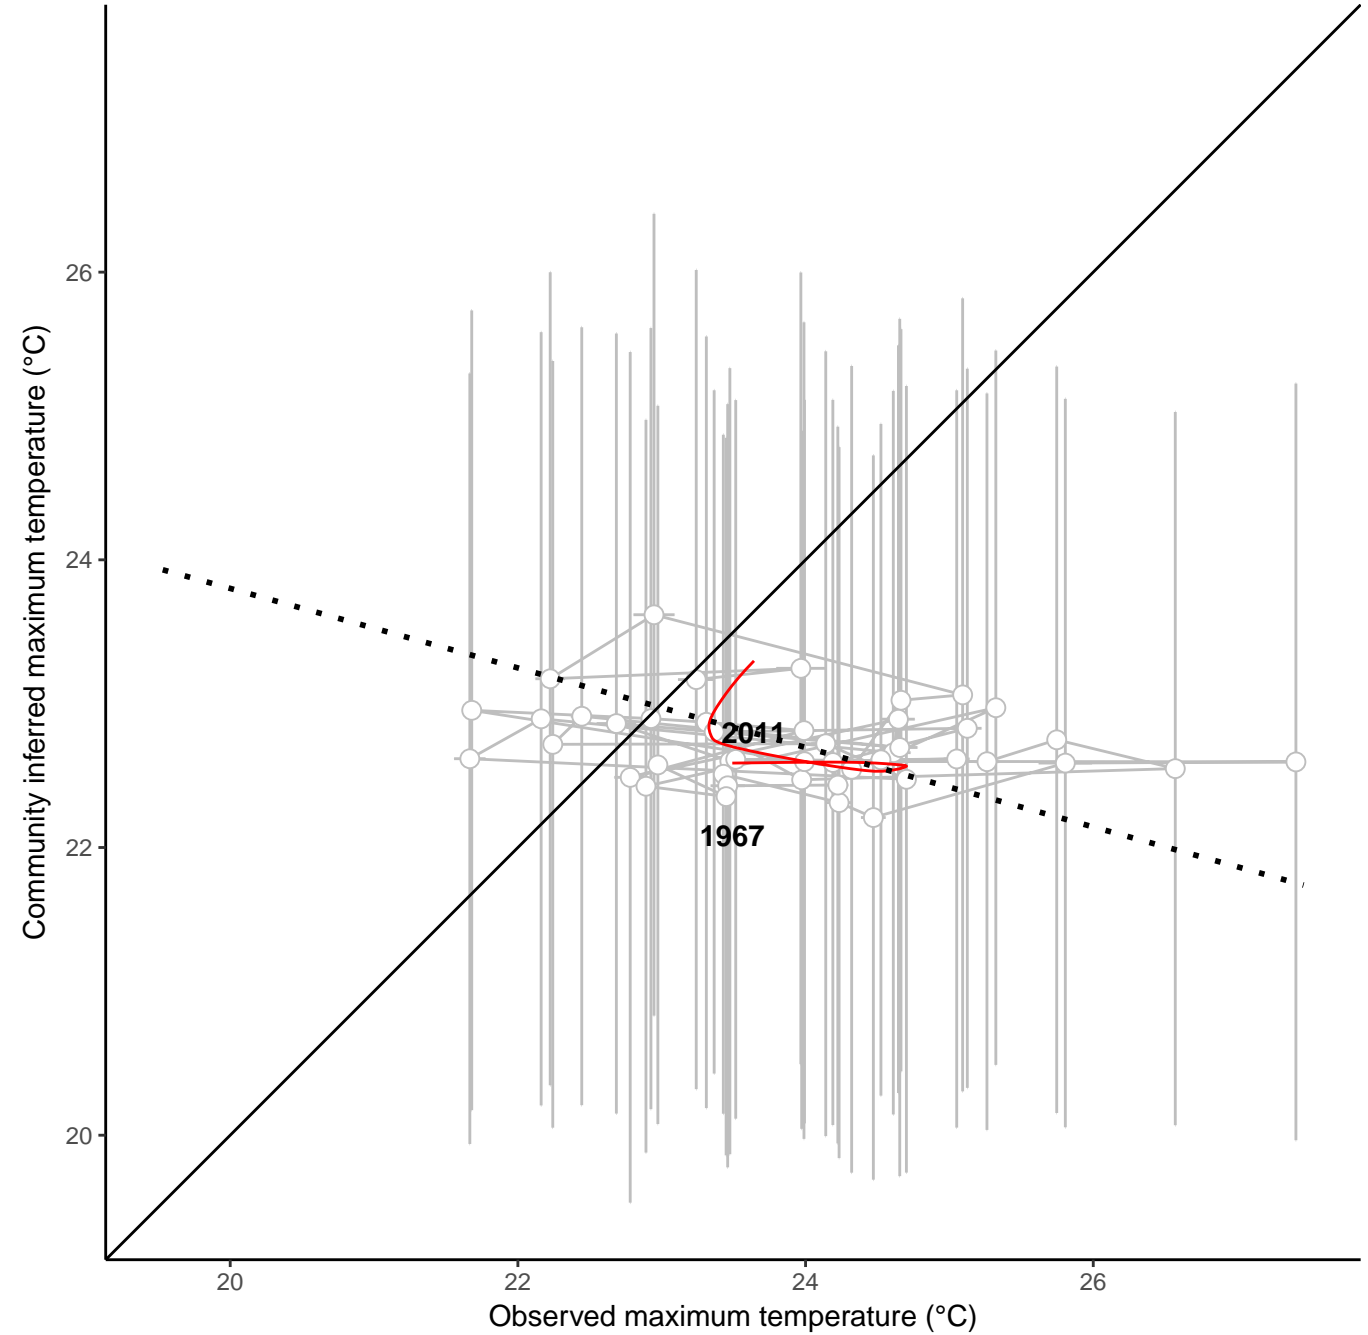

site : 840\_14\_181

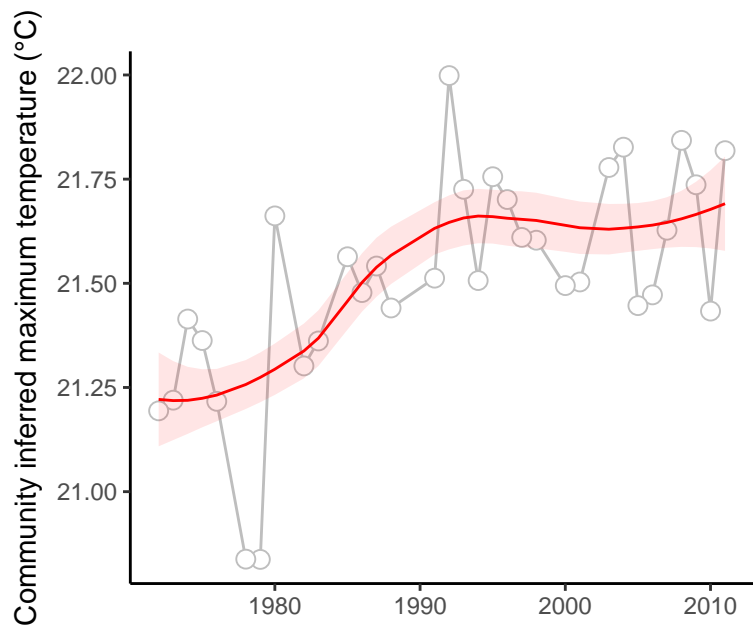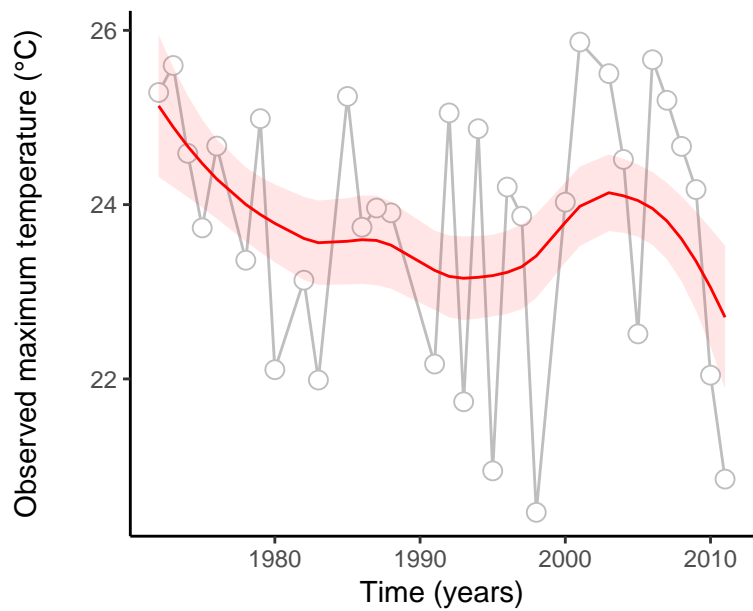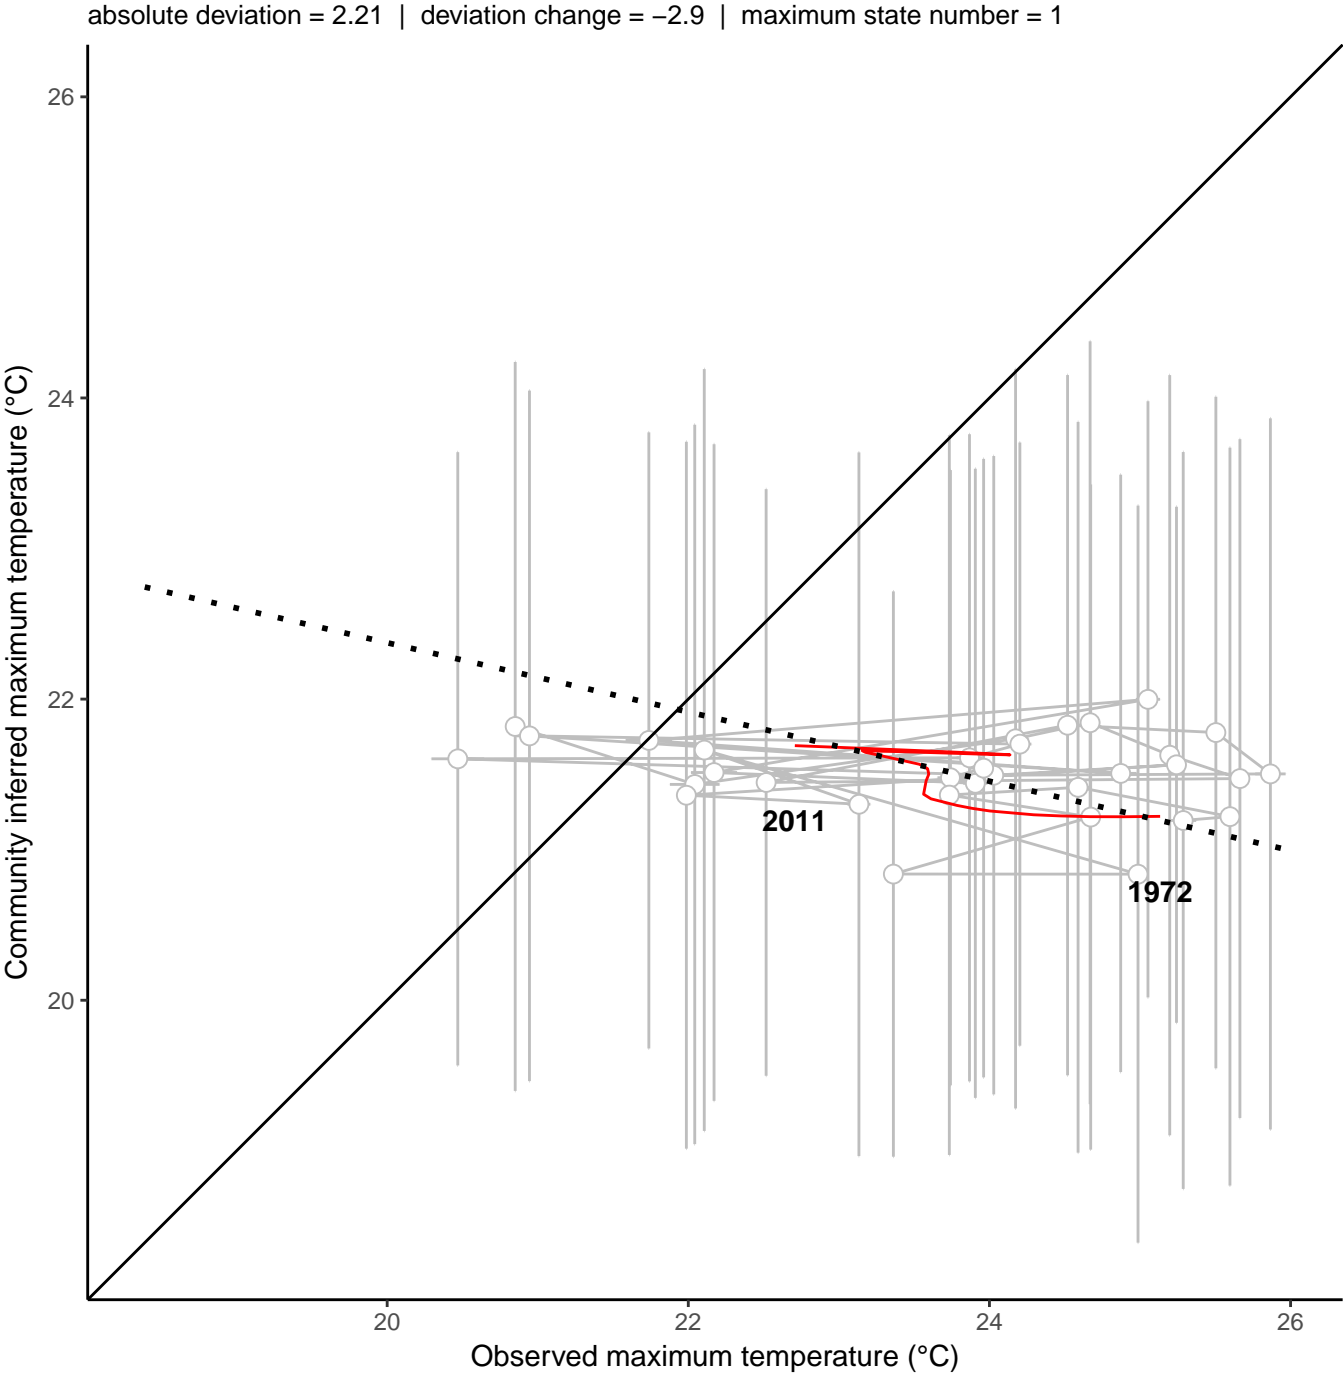

site : 840\_2\_39

absolute deviation = 4.91 | deviation change = 1.03 | maximum state number = 1

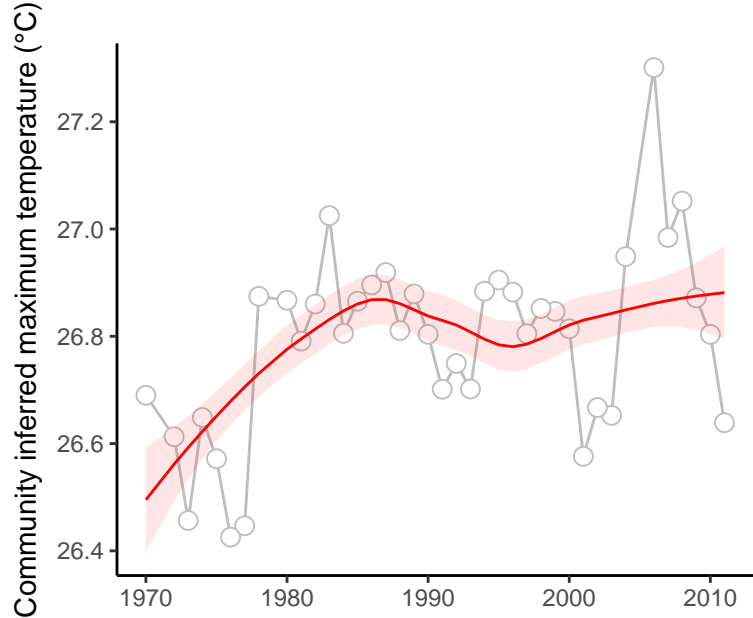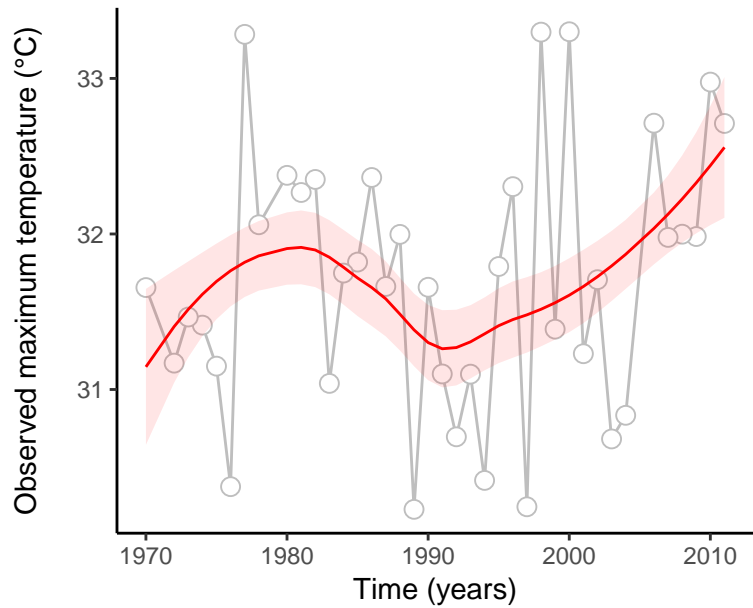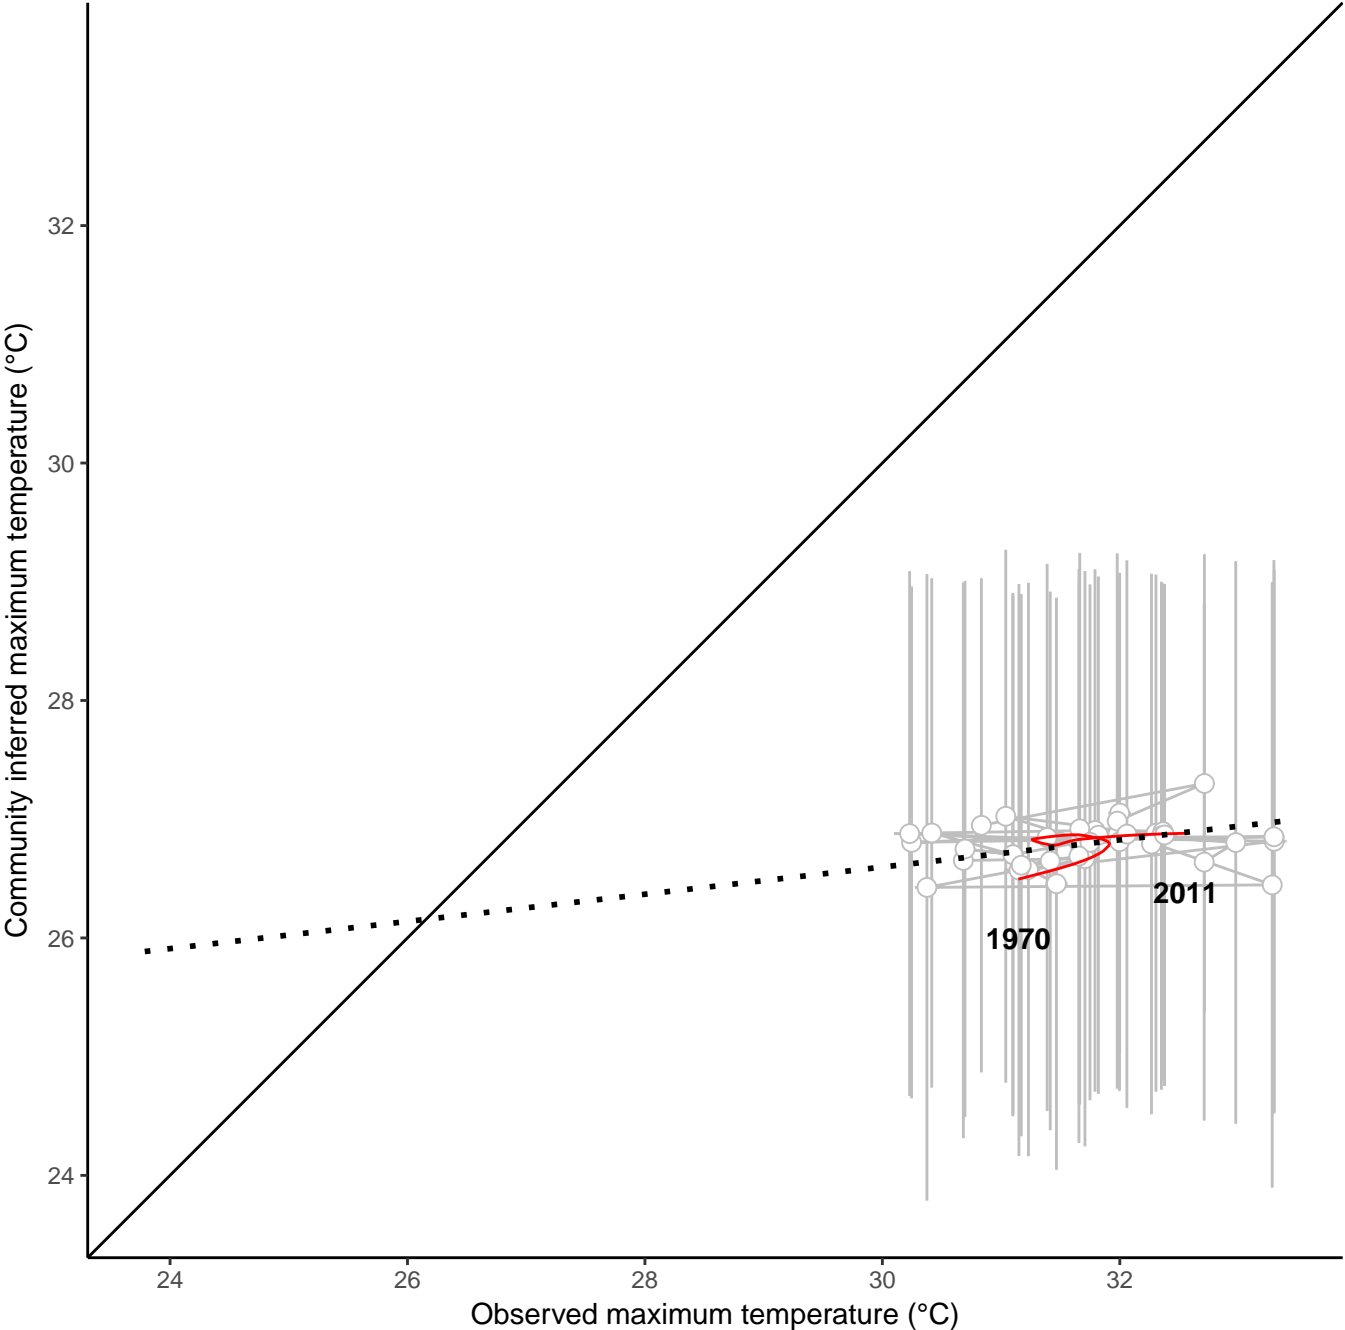

site : 840\_27\_6

absolute deviation = 5.62 | deviation change = 1.34 | maximum state number = 1

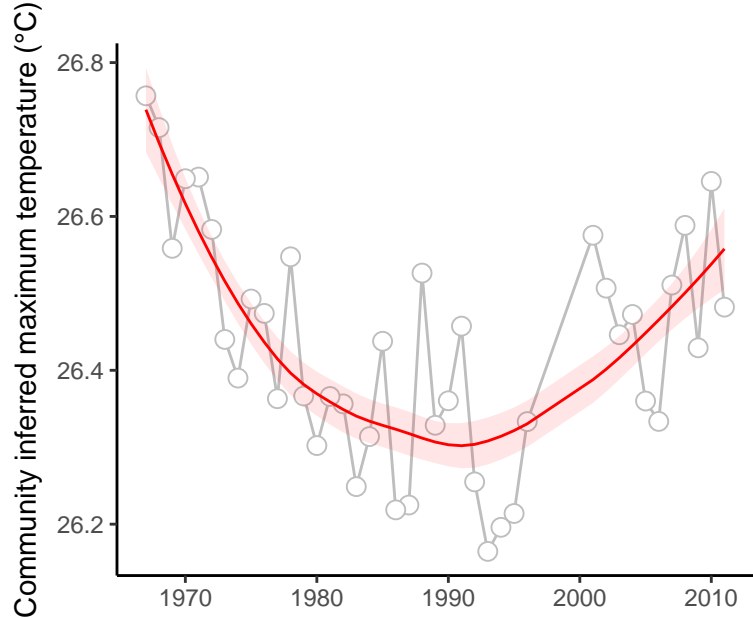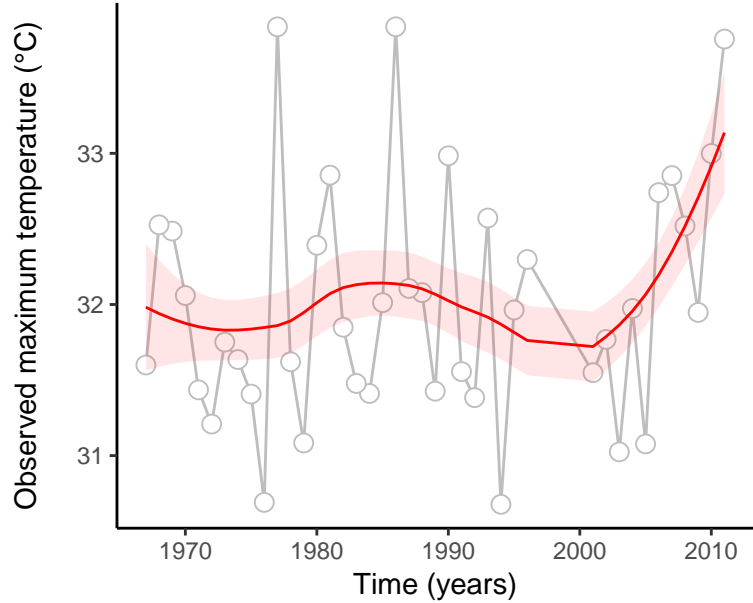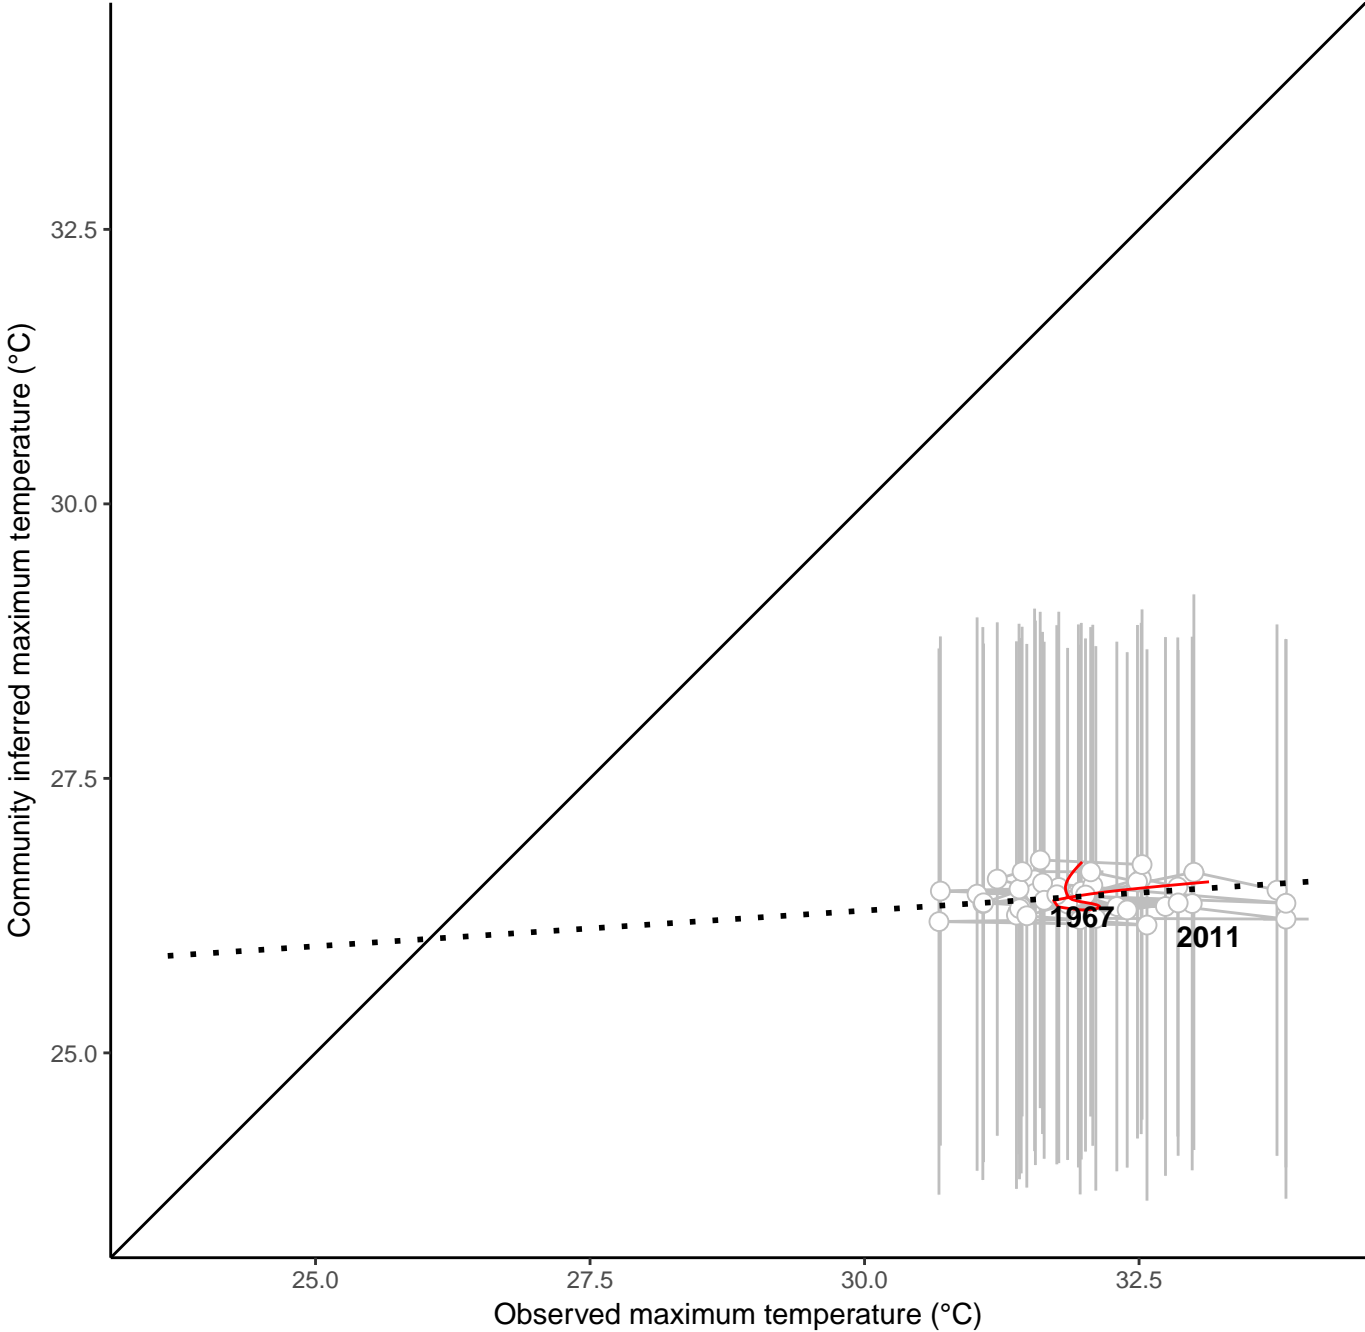

site : 840\_38\_31

absolute deviation = 4.52 | deviation change = 1.16 | maximum state number = 1

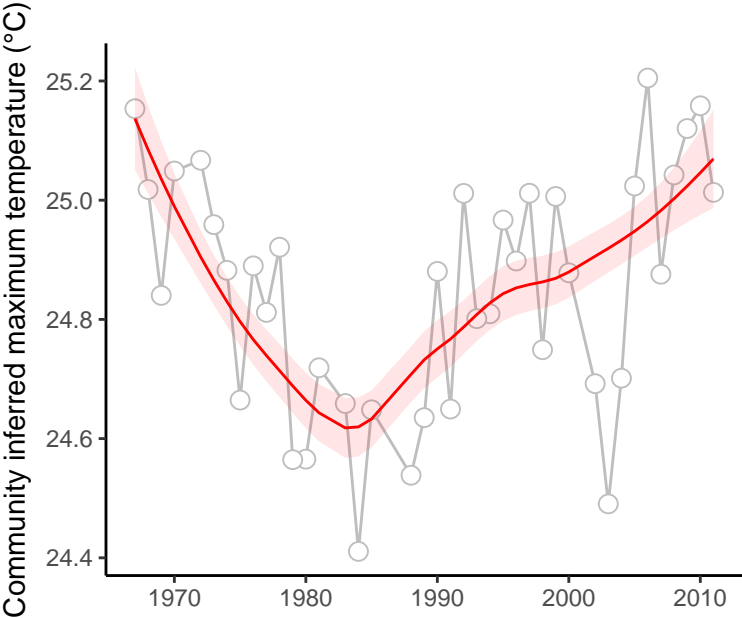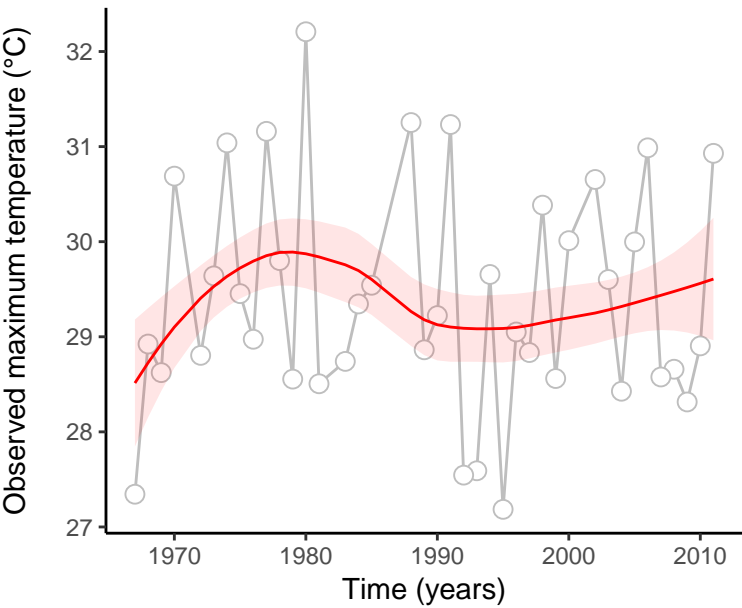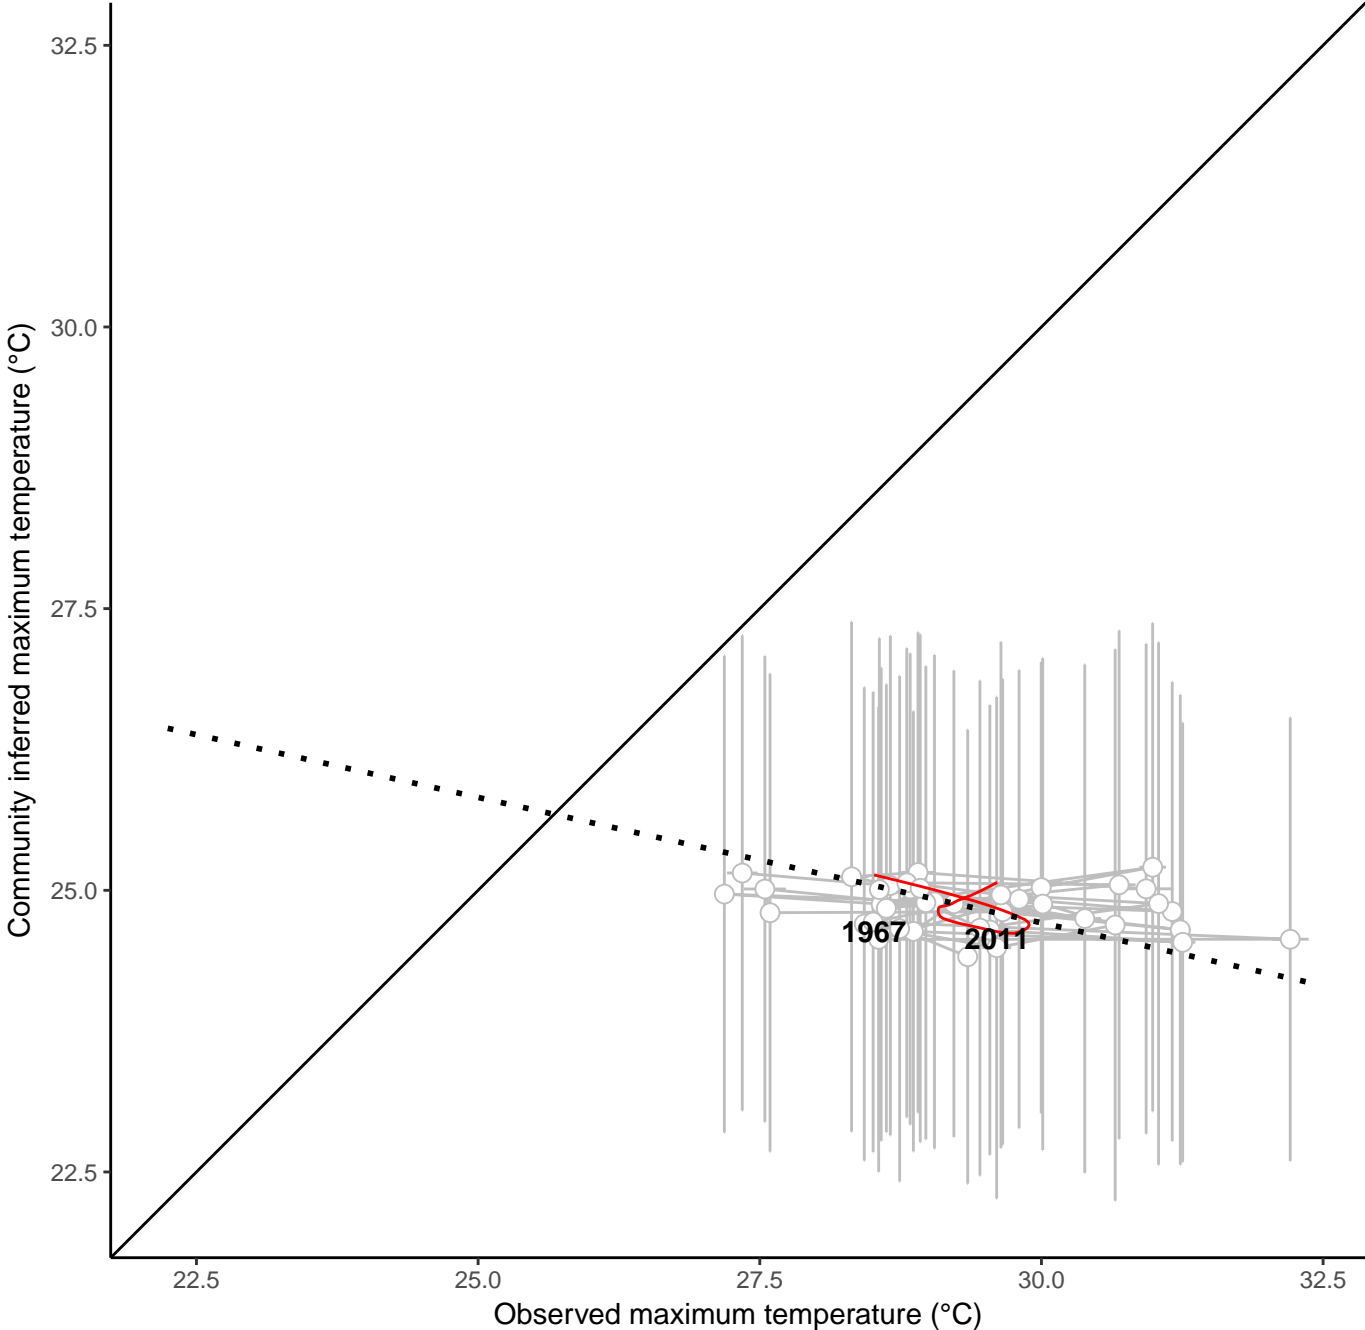

site : 840\_44\_42

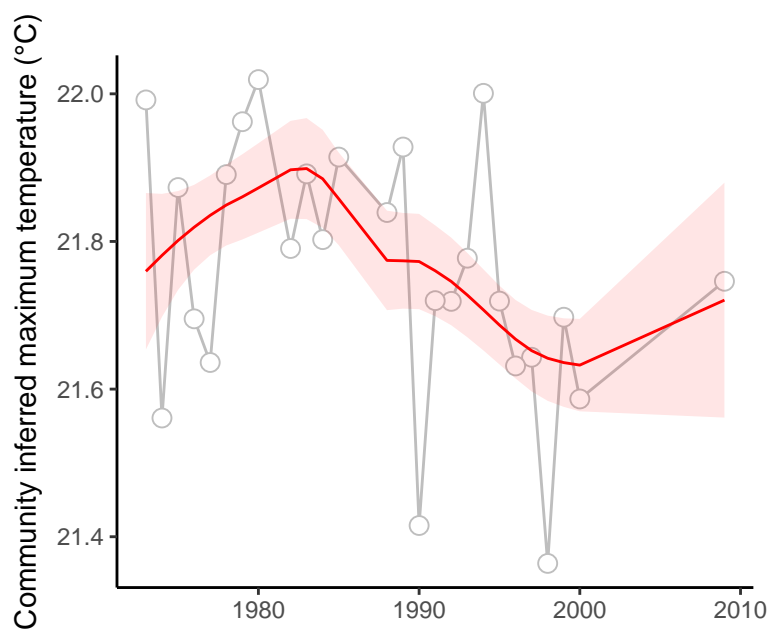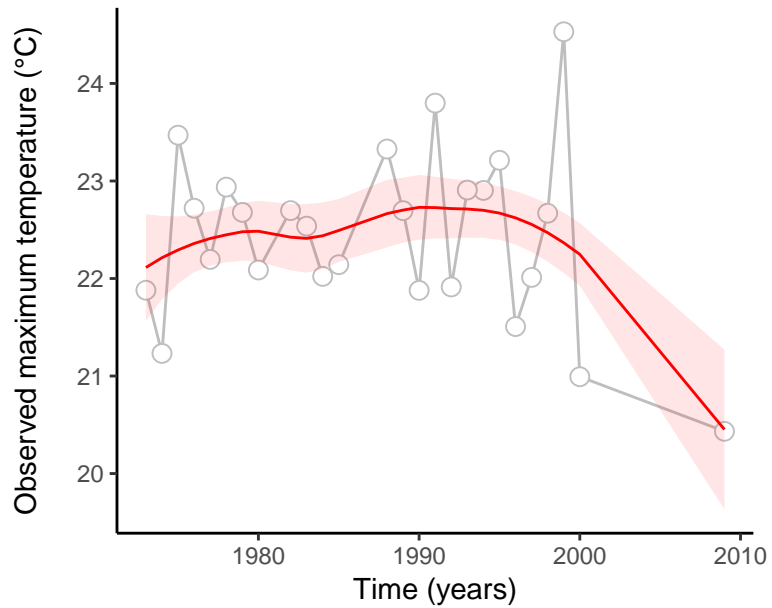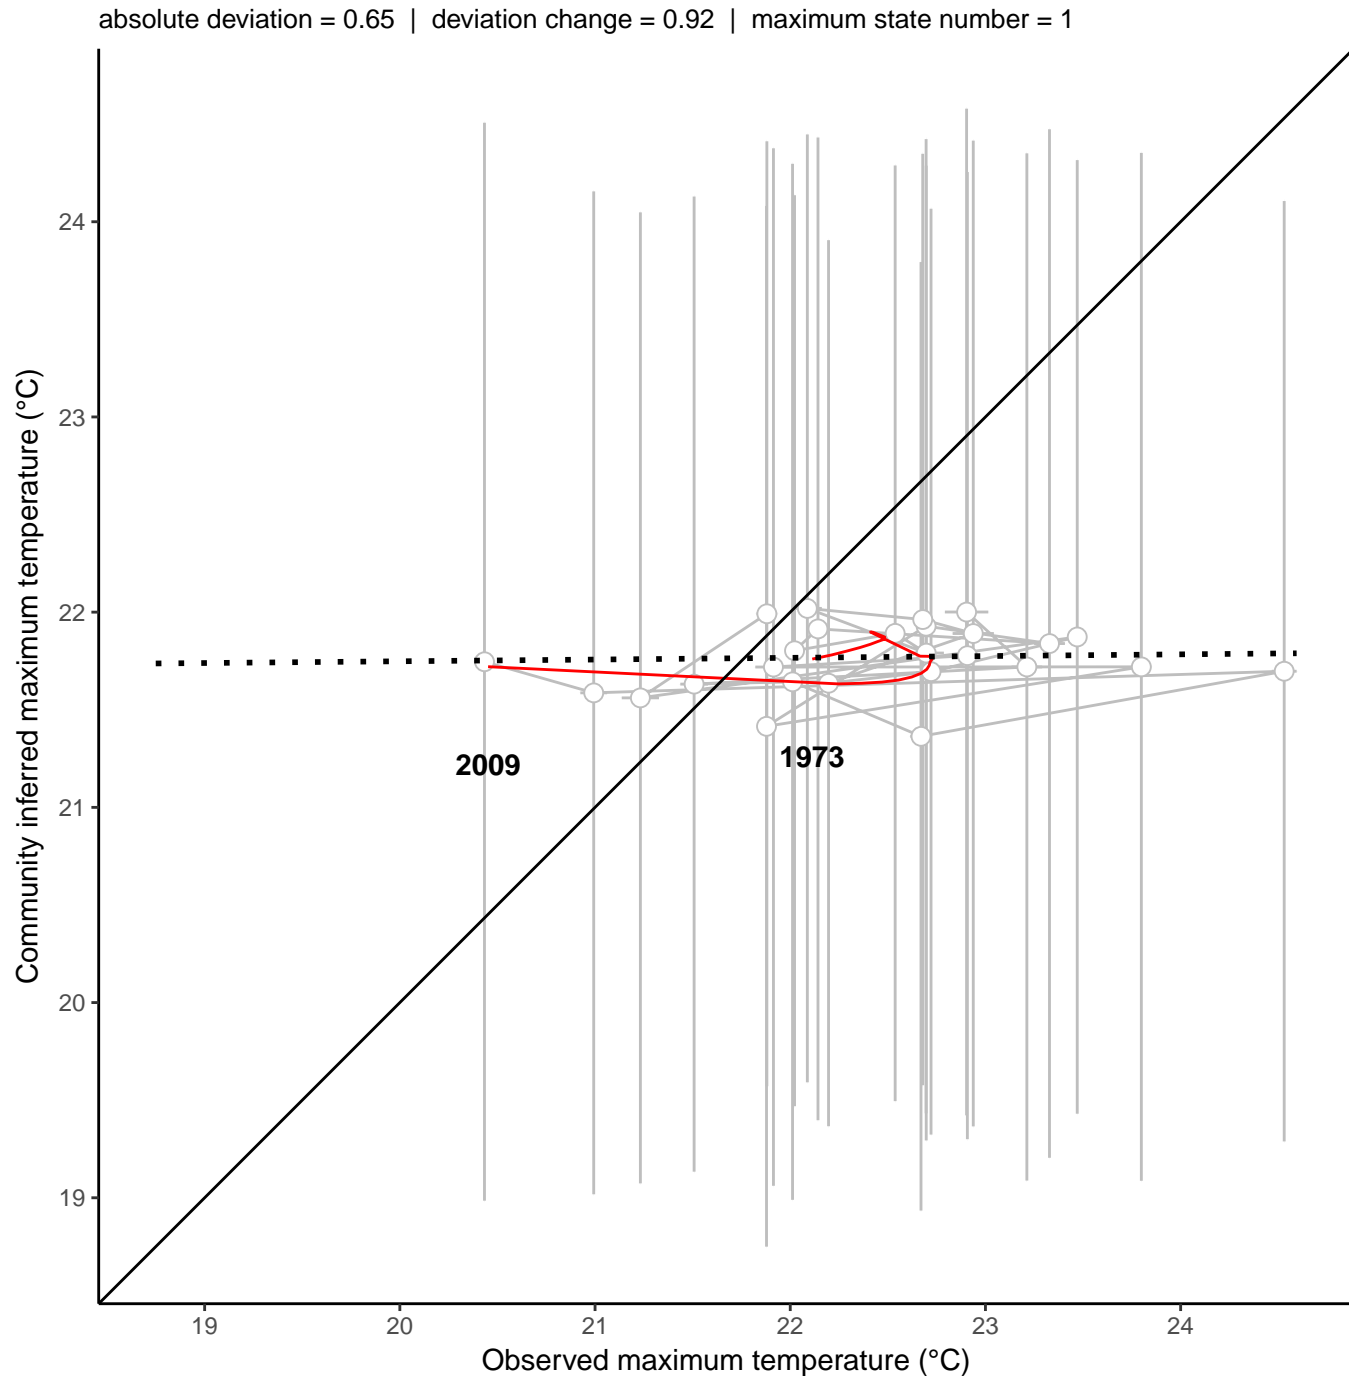



site : 840\_46\_16

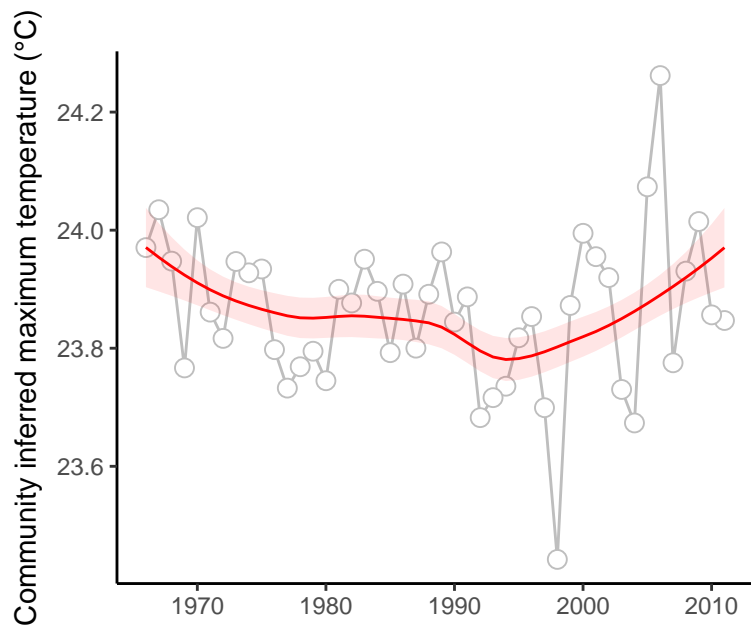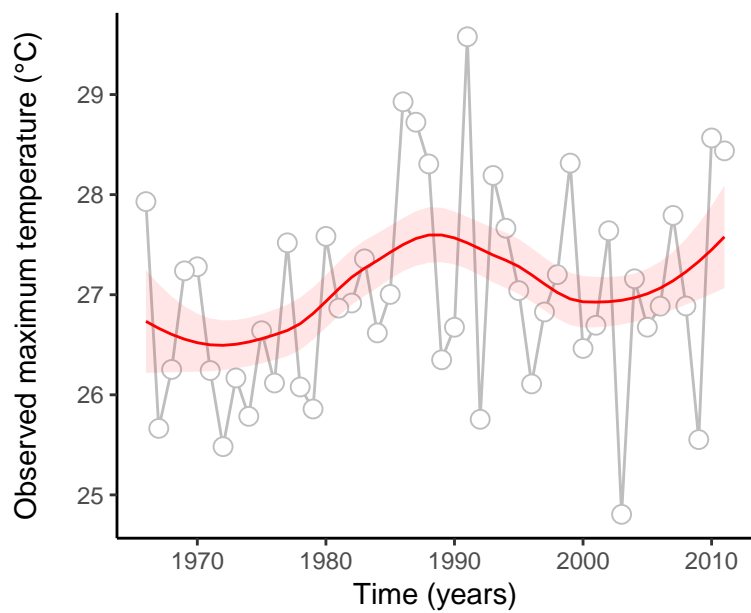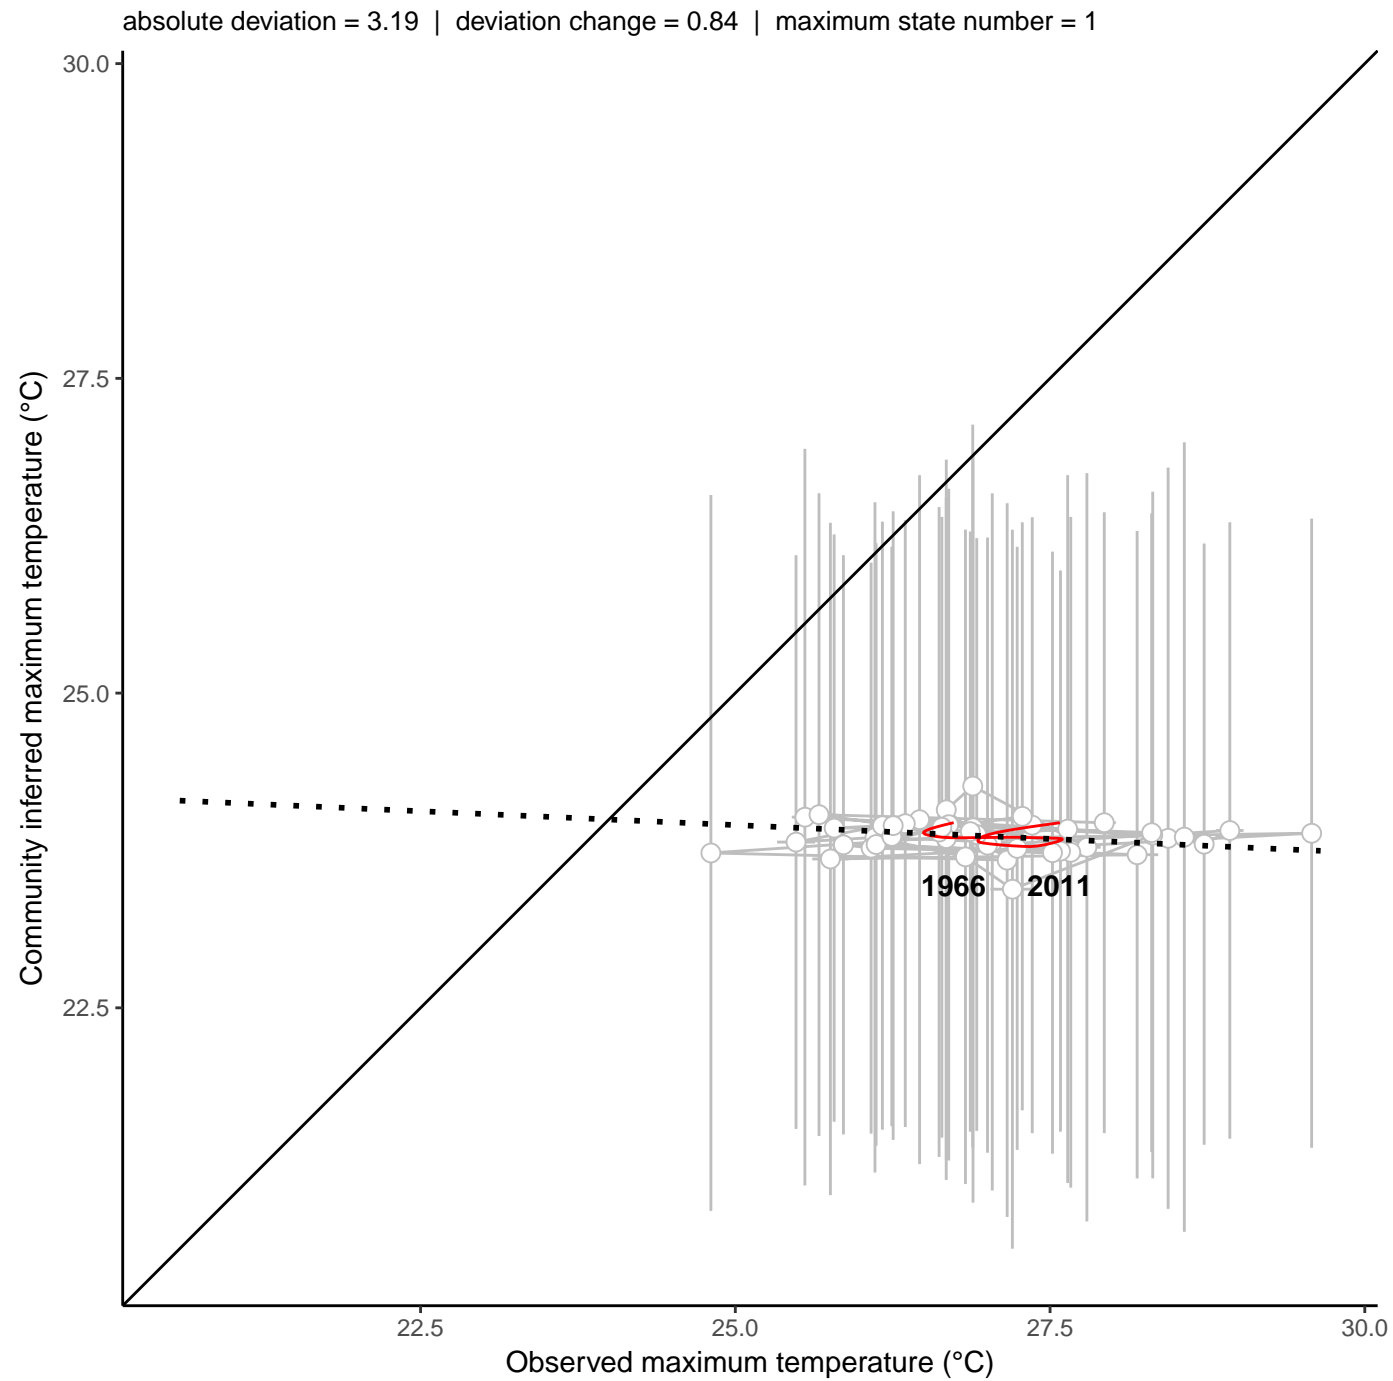

site : 840\_46\_33

absolute deviation = 2.94 | deviation change = 0.7 | maximum state number = 1

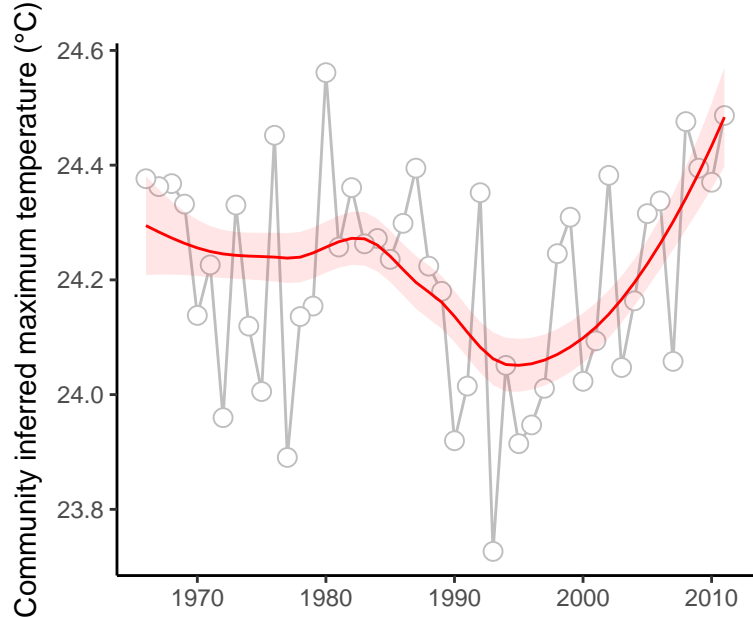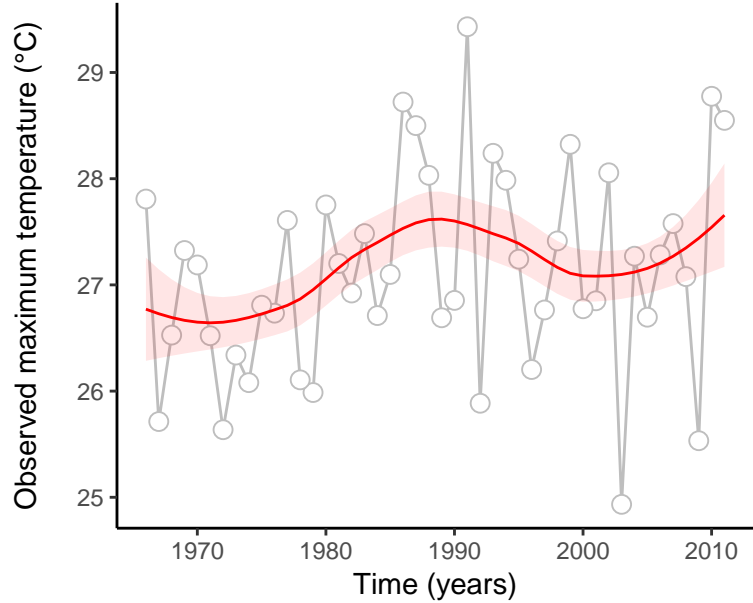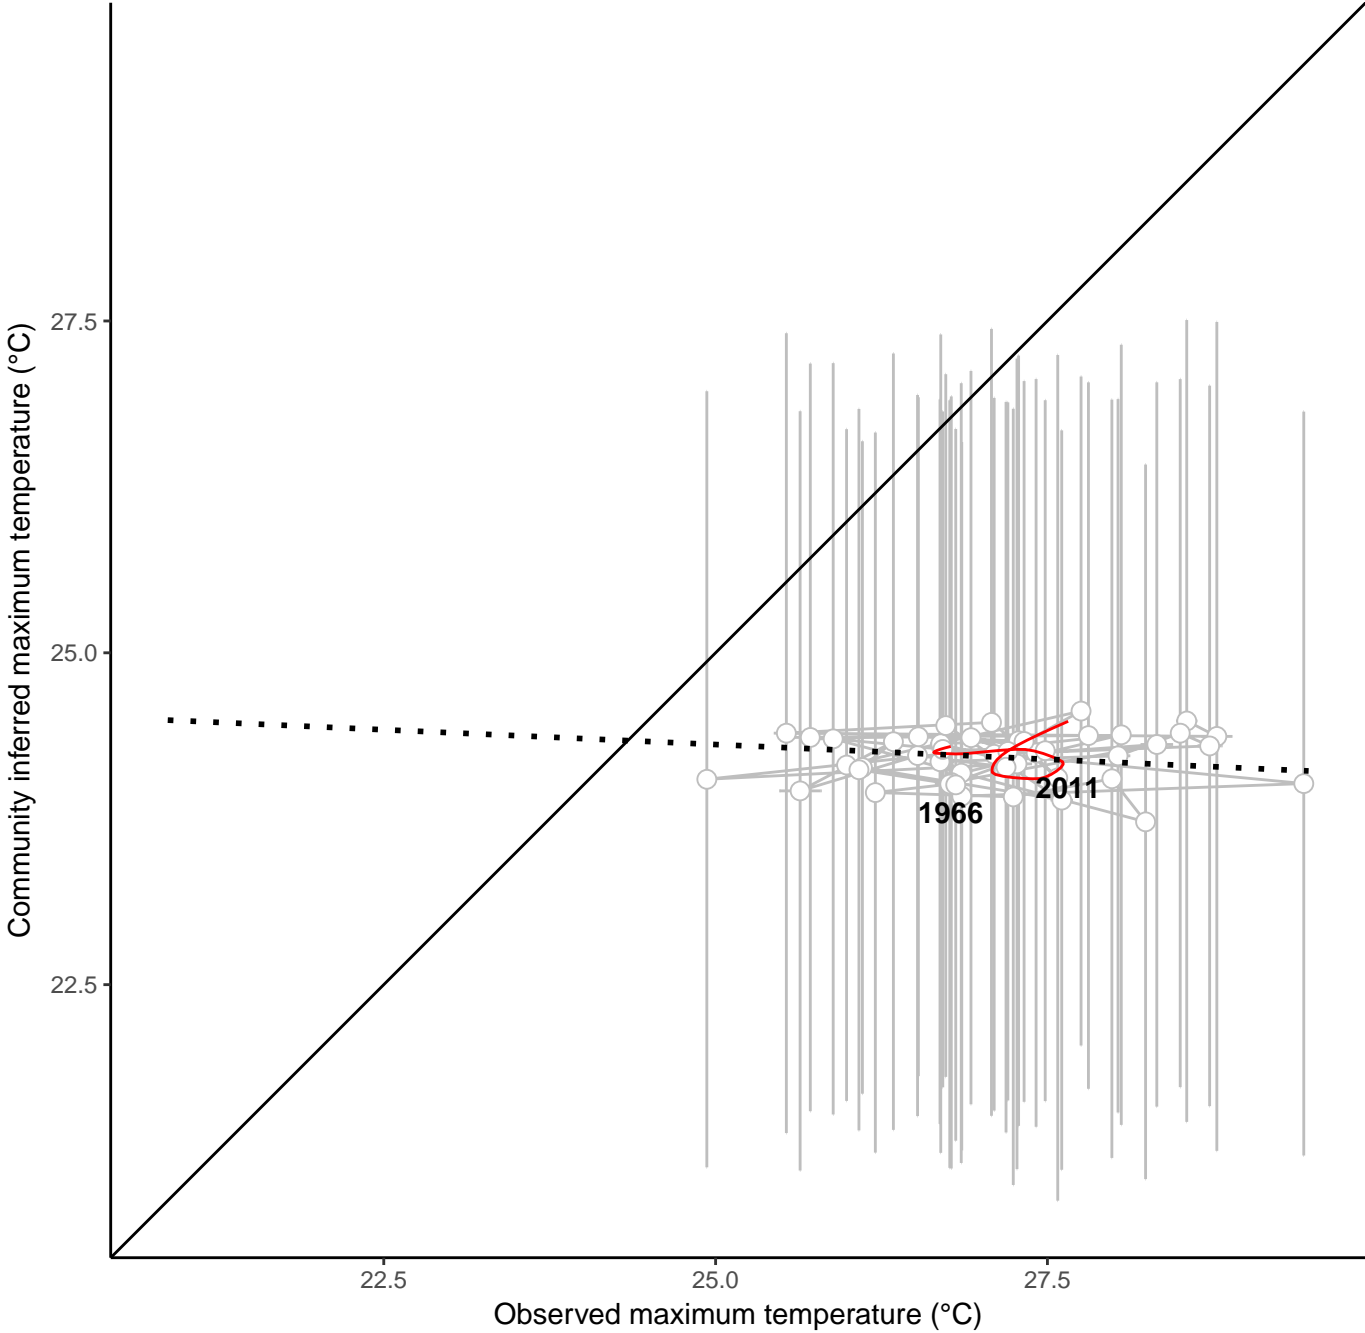

site : 840\_50\_17

absolute deviation = 1.96 | deviation change = 0.87 | maximum state number = 1

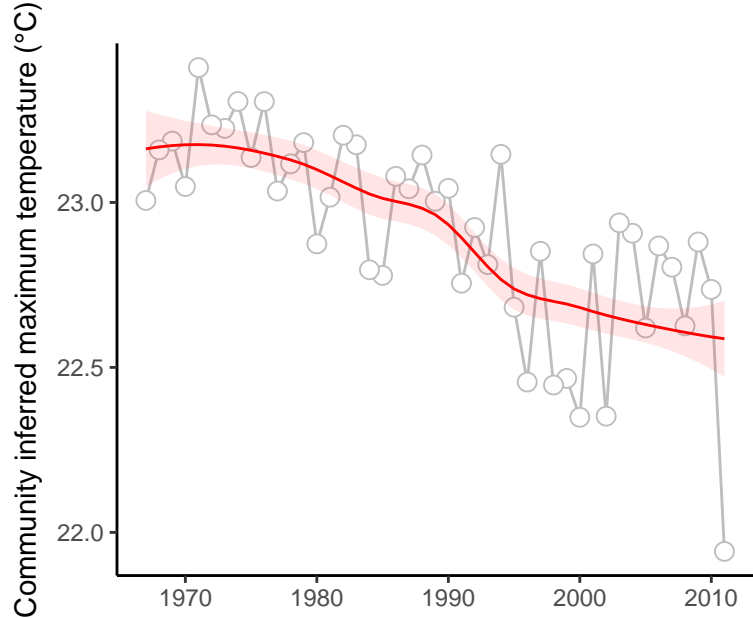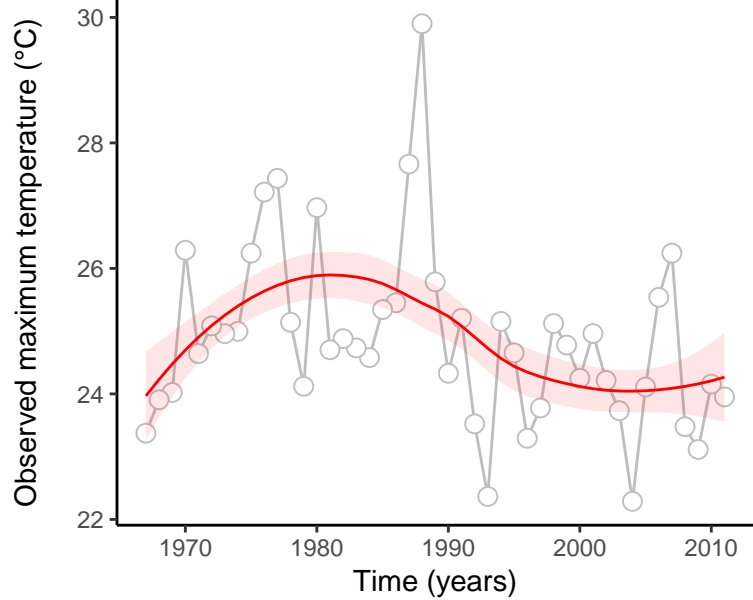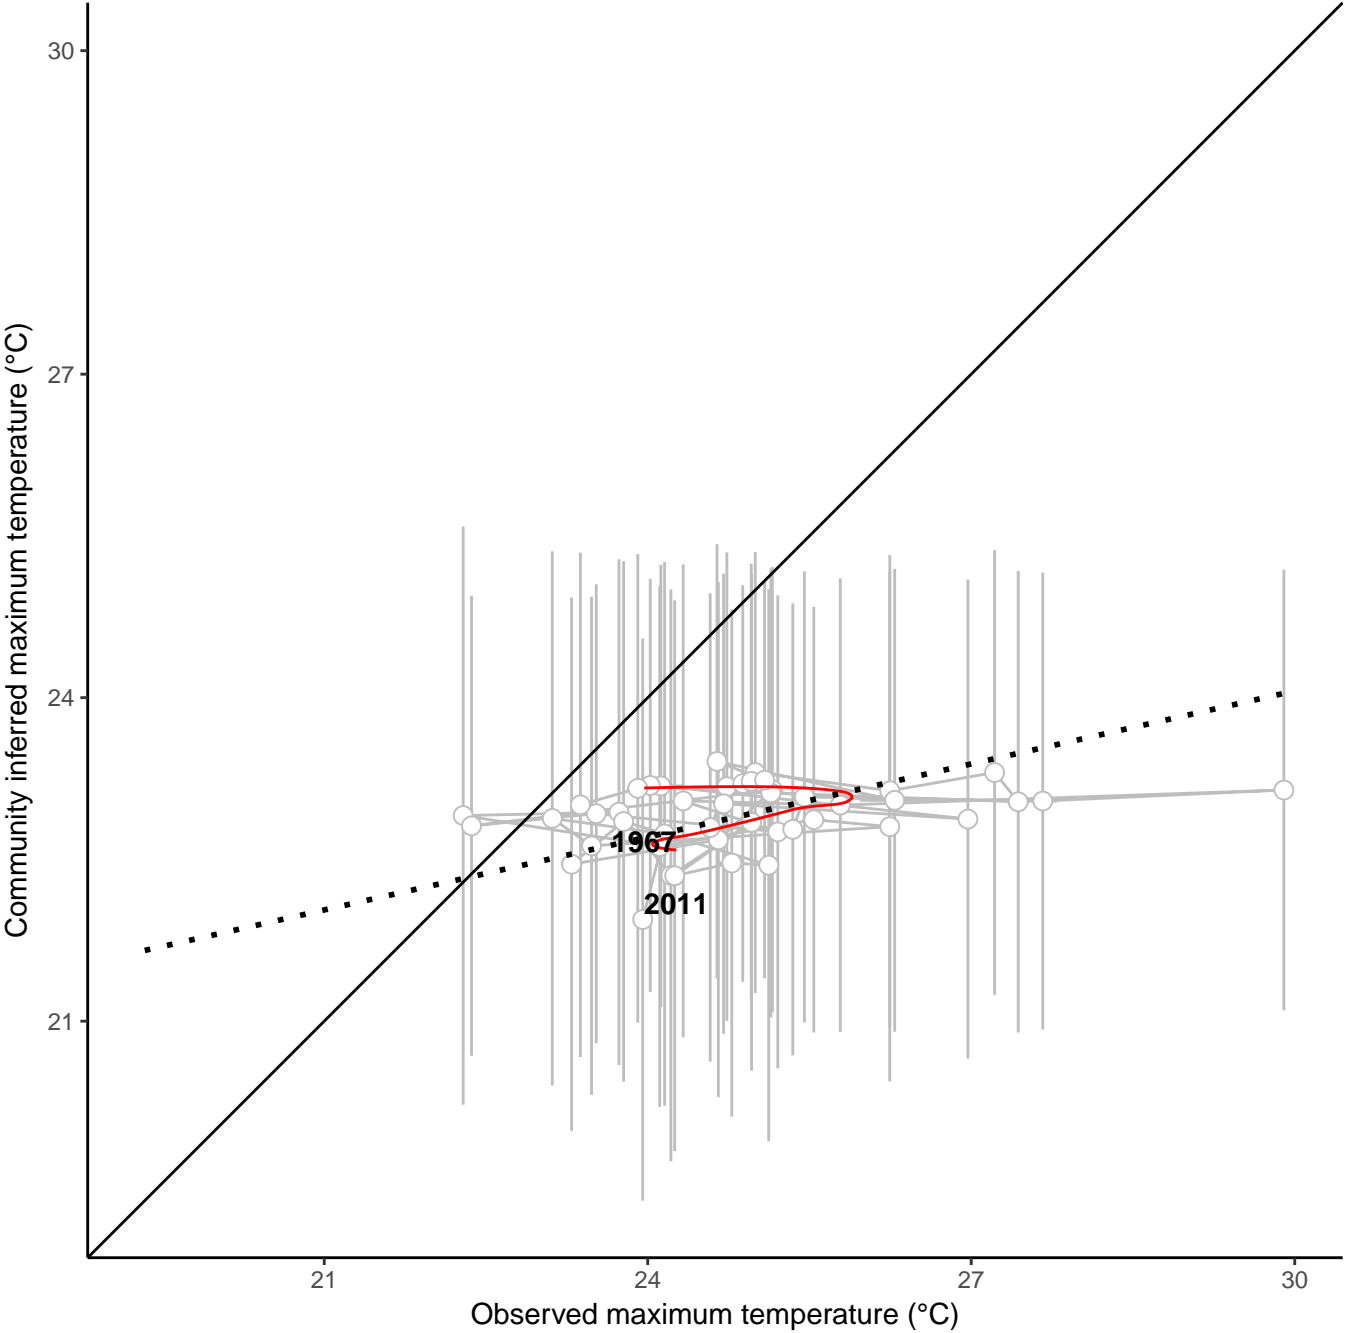

site : 840\_52\_14

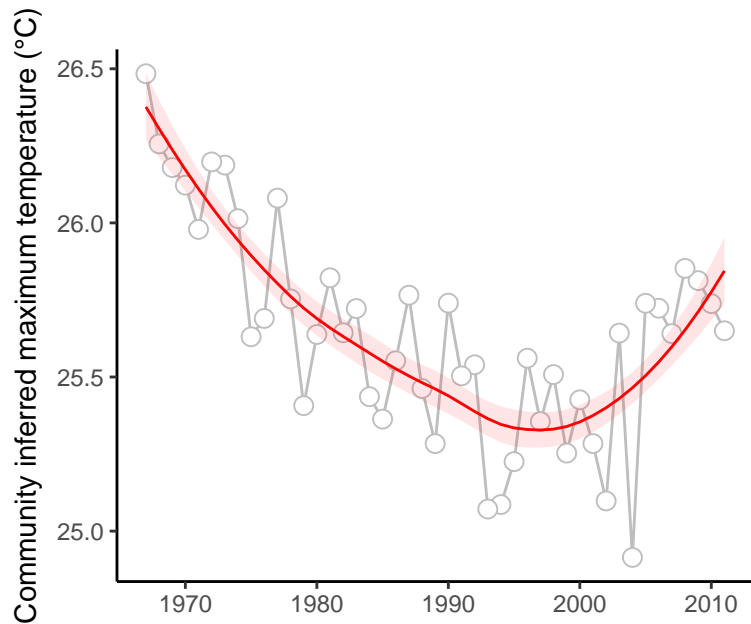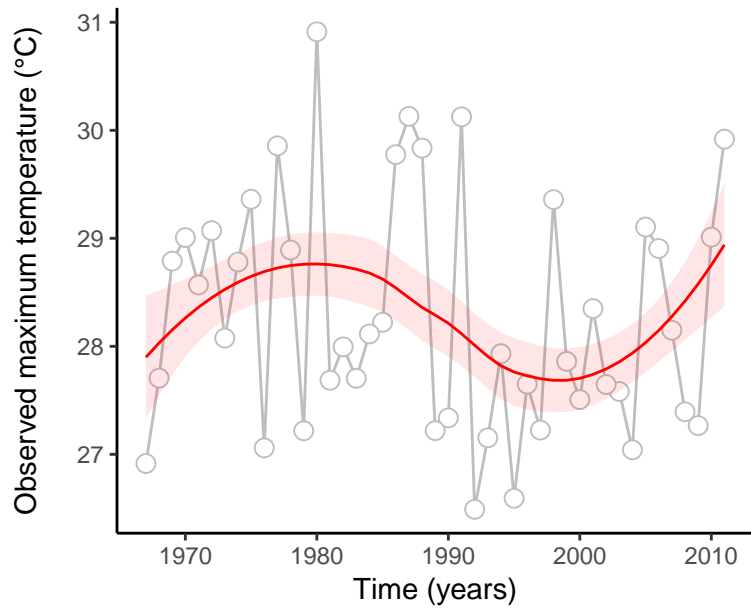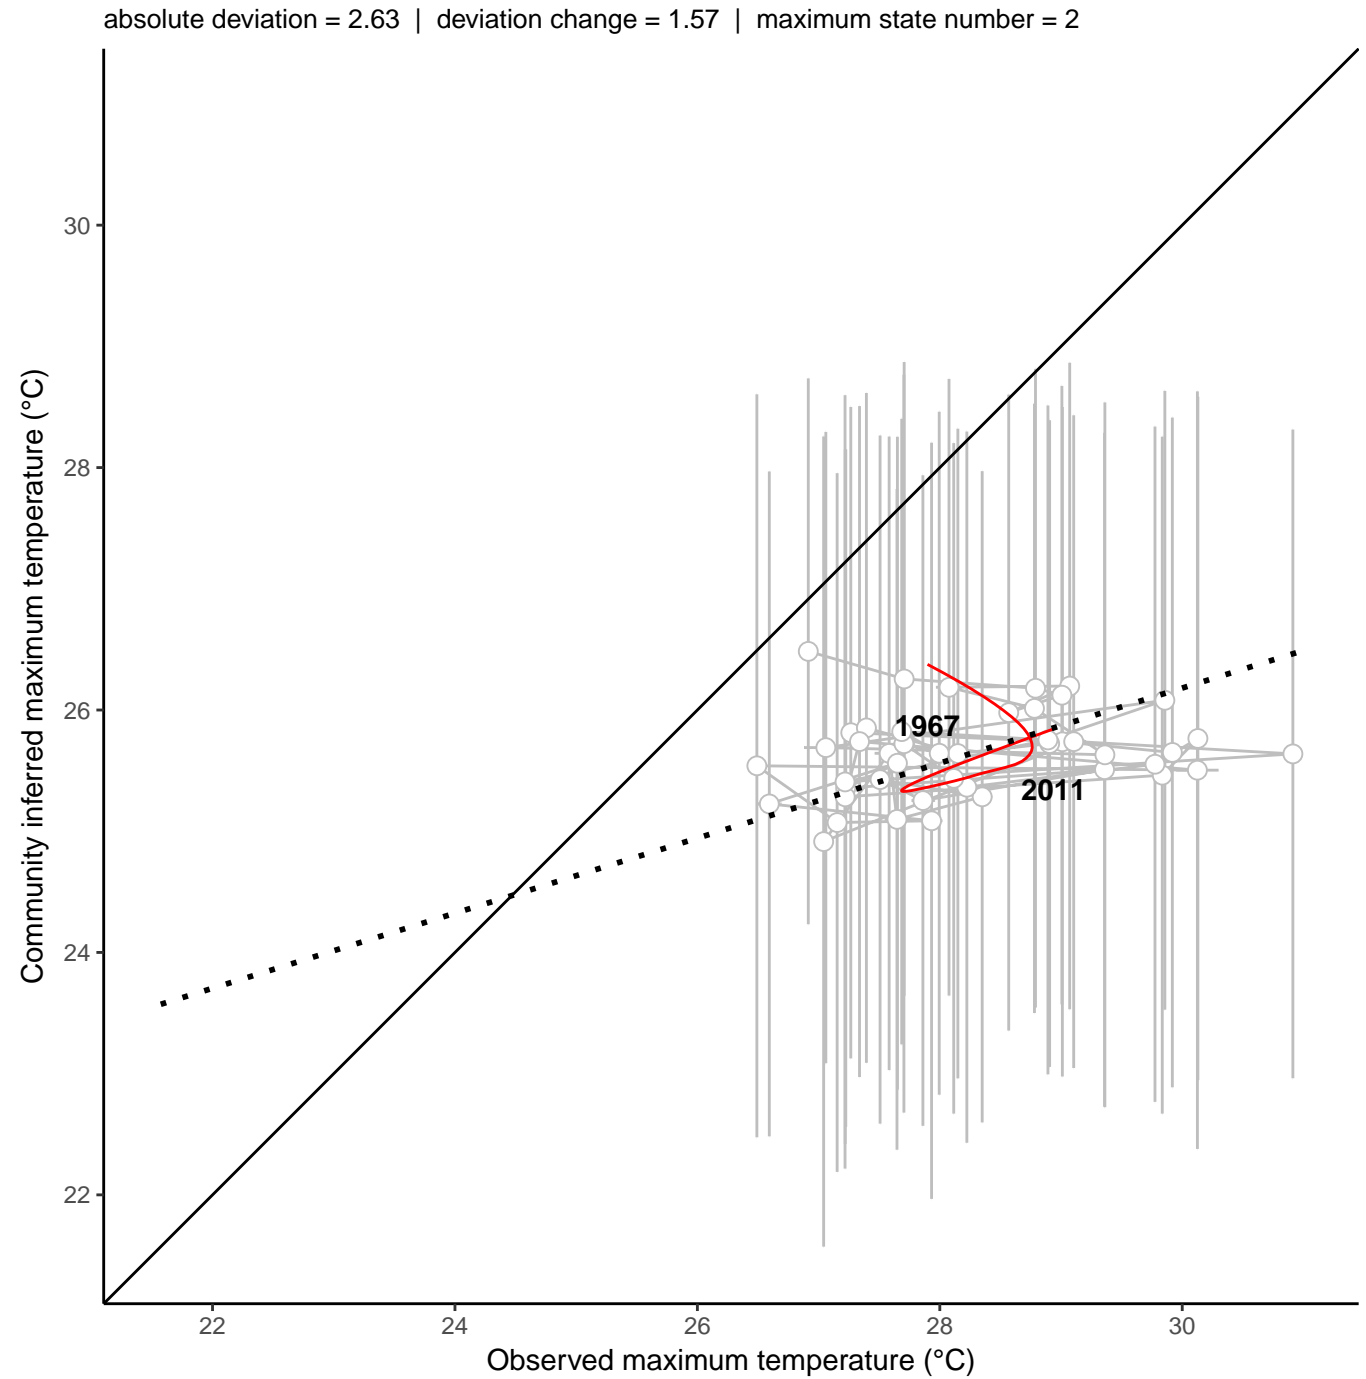

site : 840\_52\_5

absolute deviation = 3.06 | deviation change = 2.26 | maximum state number = 1

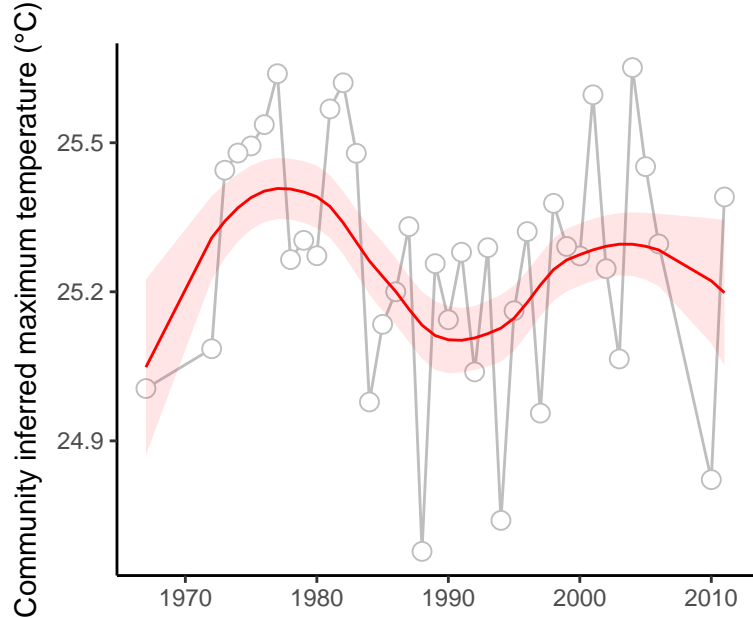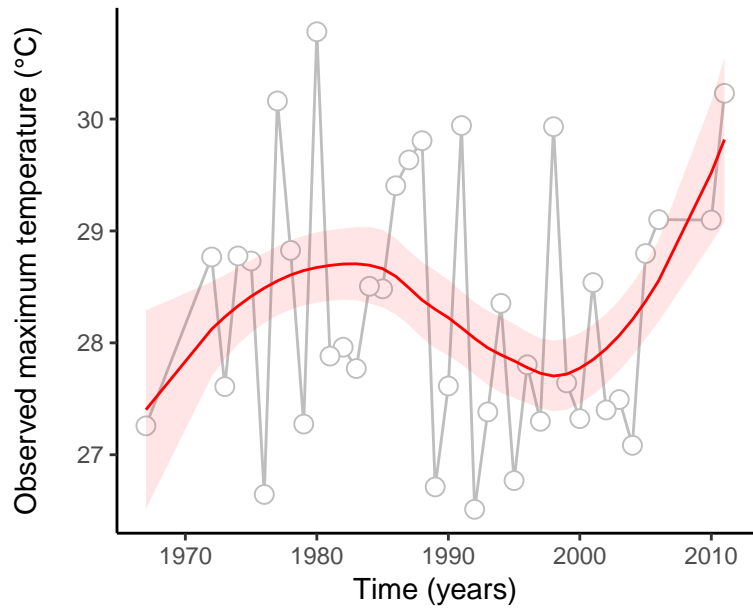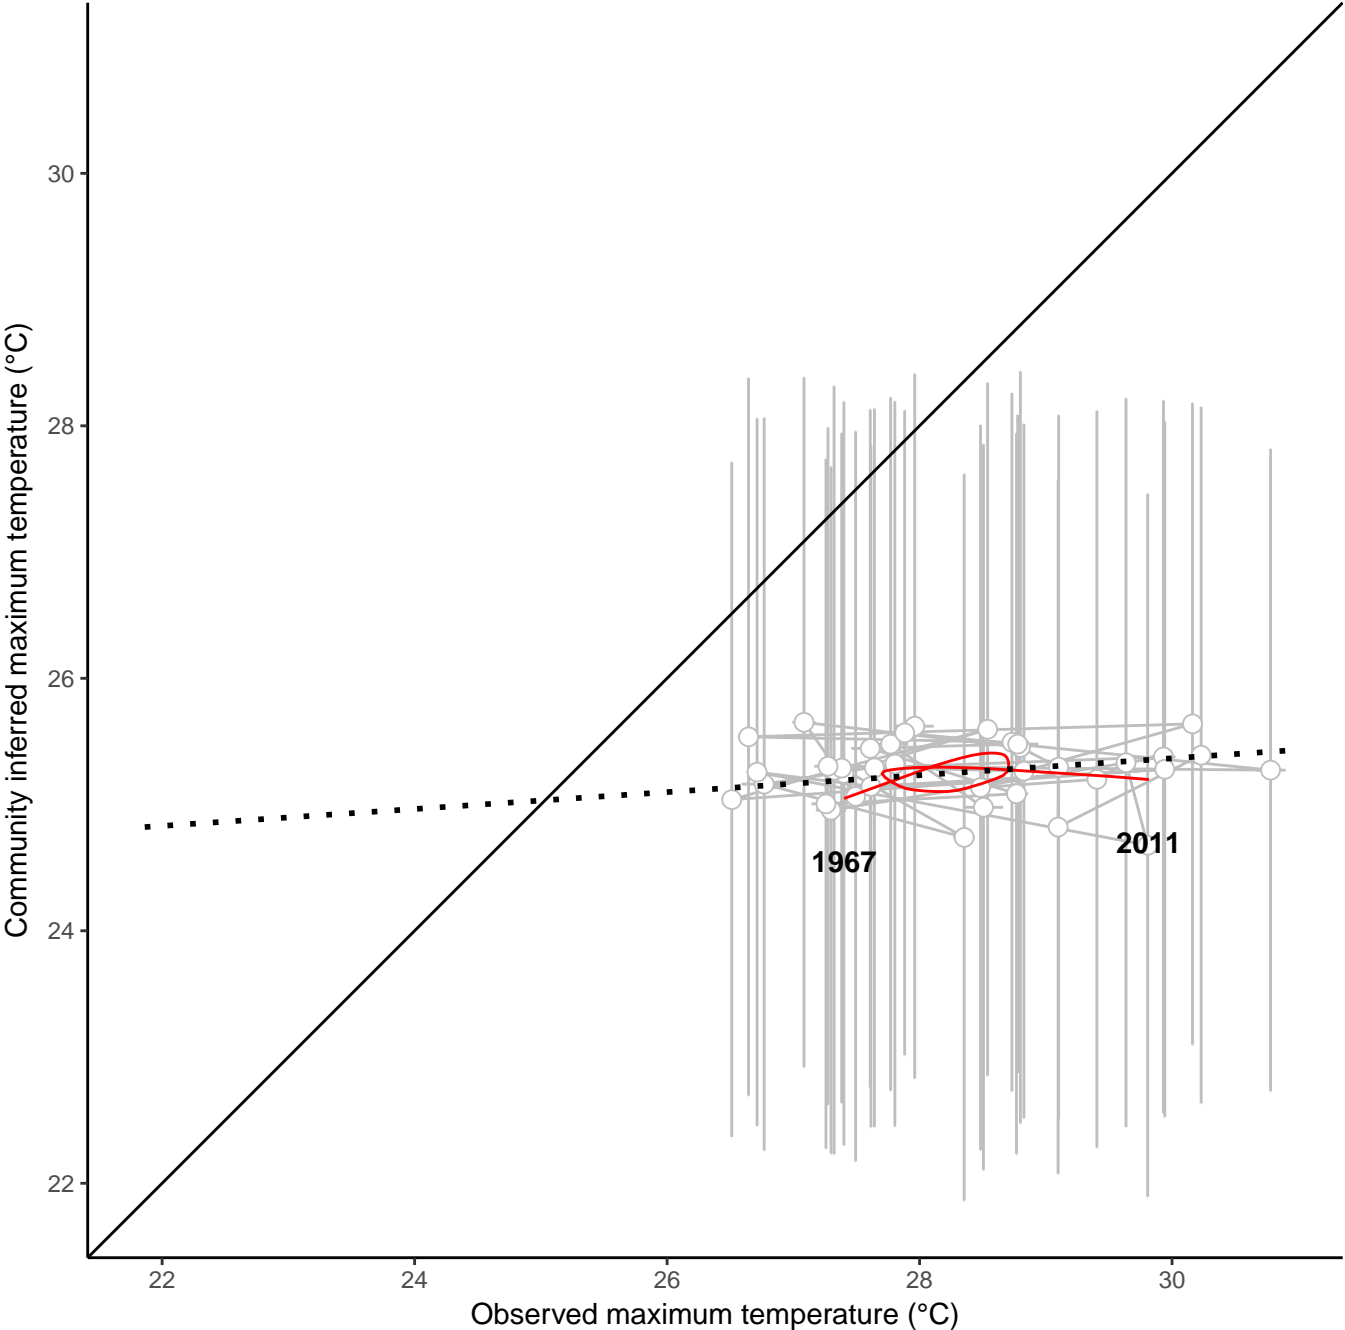

site : 840\_54\_25

absolute deviation = 2.67 | deviation change = -0.84 | maximum state number = 1

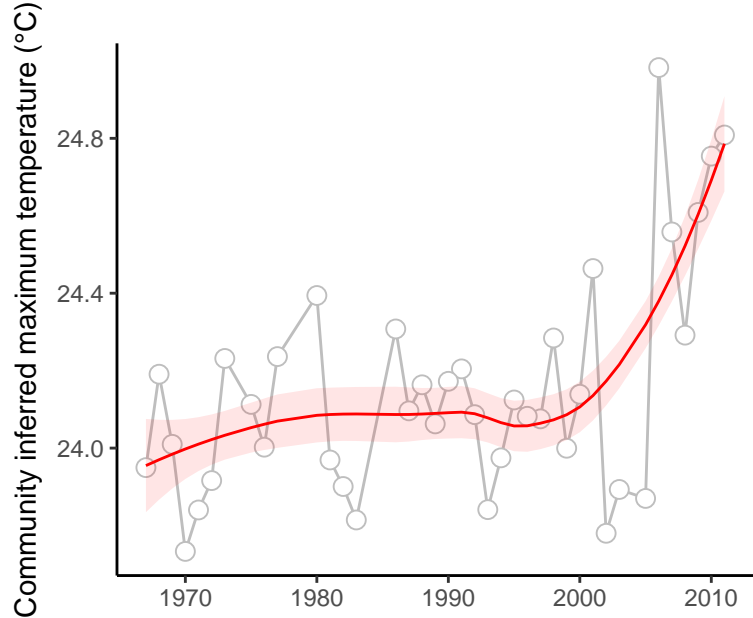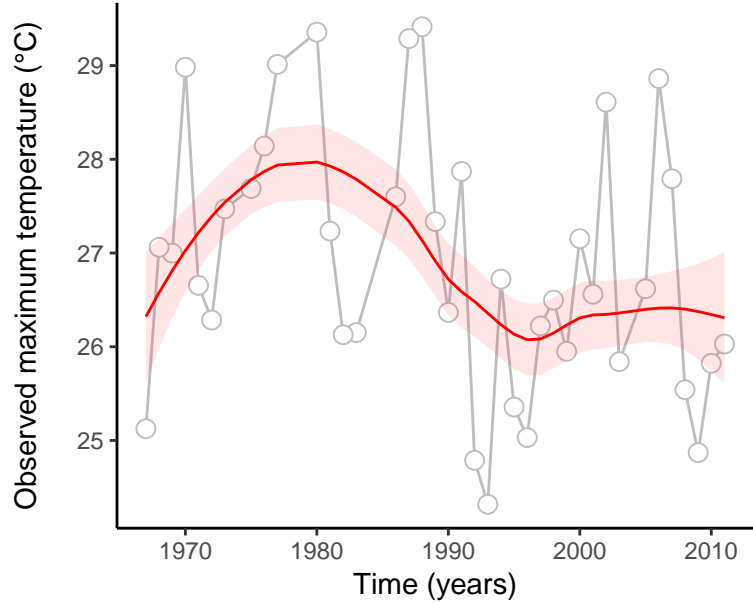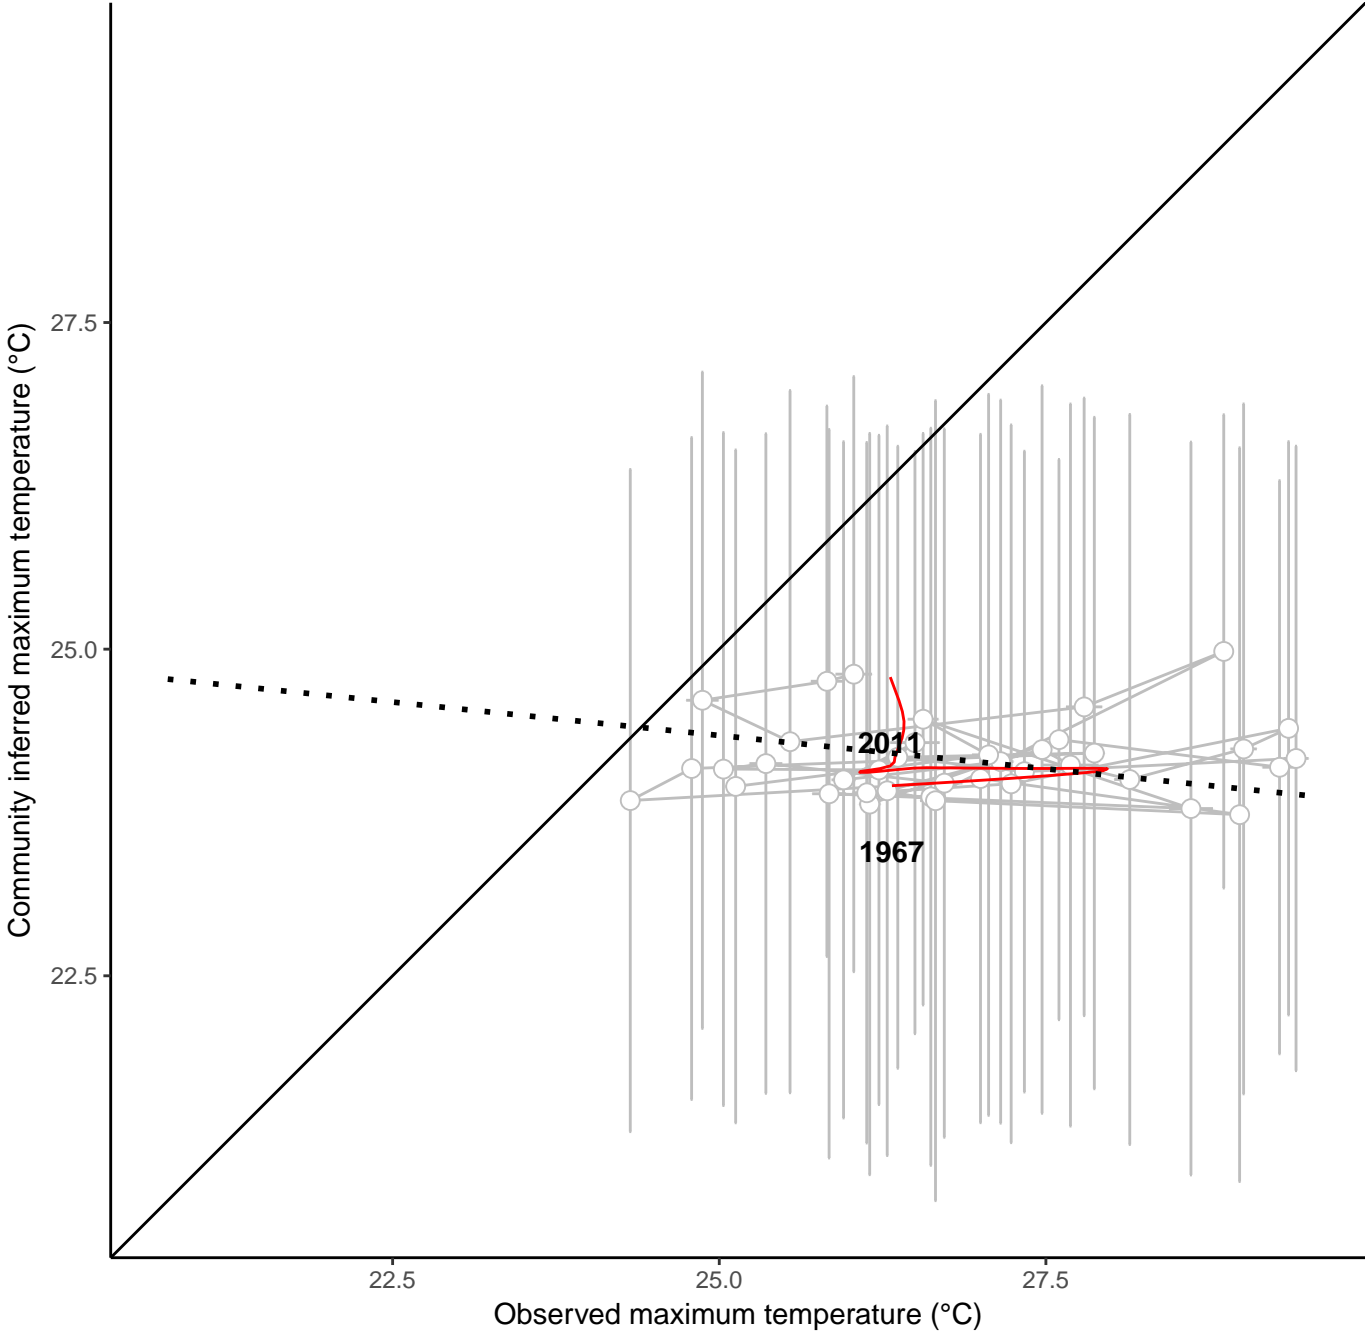

site : 840\_61\_70

absolute deviation = 0.74 | deviation change = 1.15 | maximum state number = 1

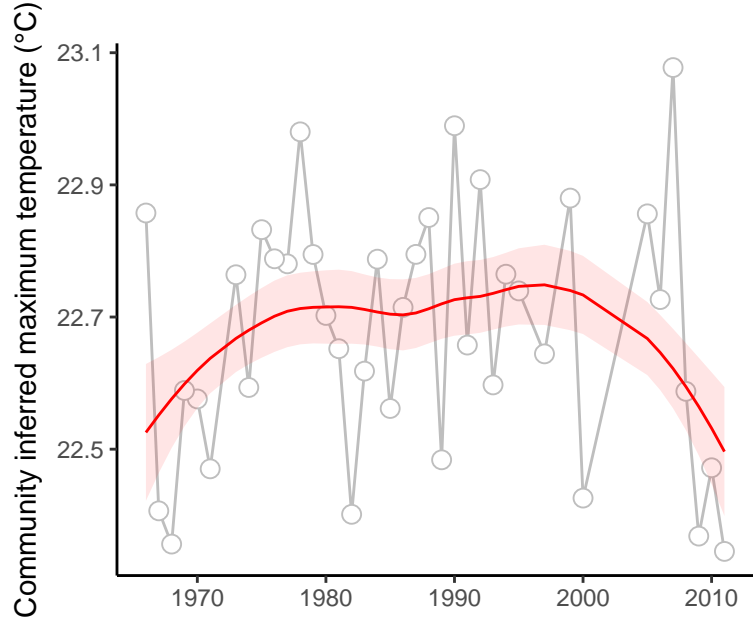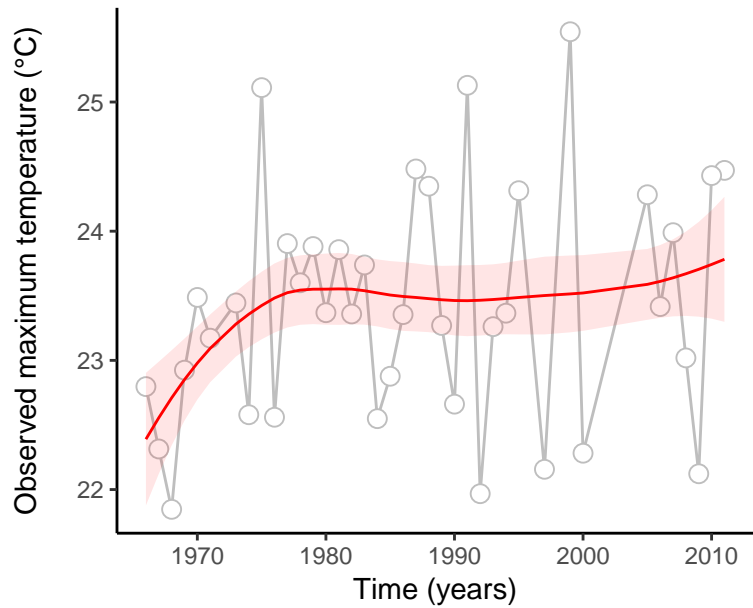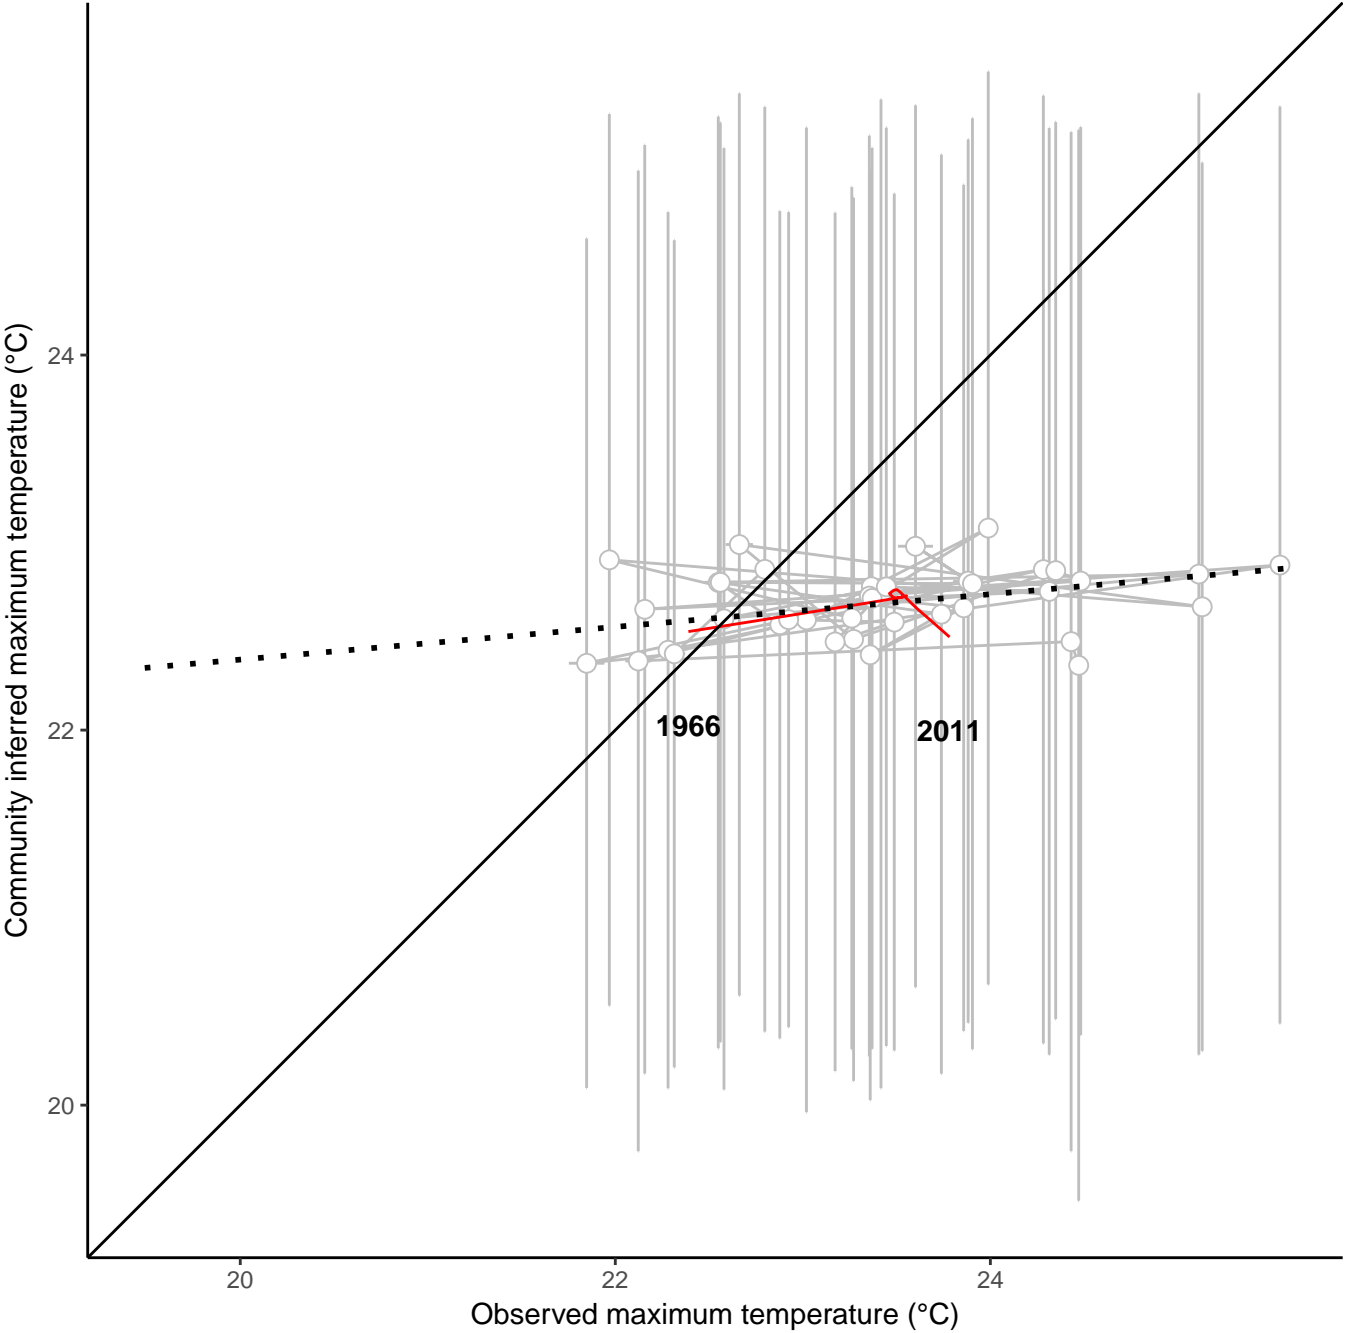

site : 840\_63\_10

absolute deviation = 3.85 | deviation change = 1.83 | maximum state number = 2

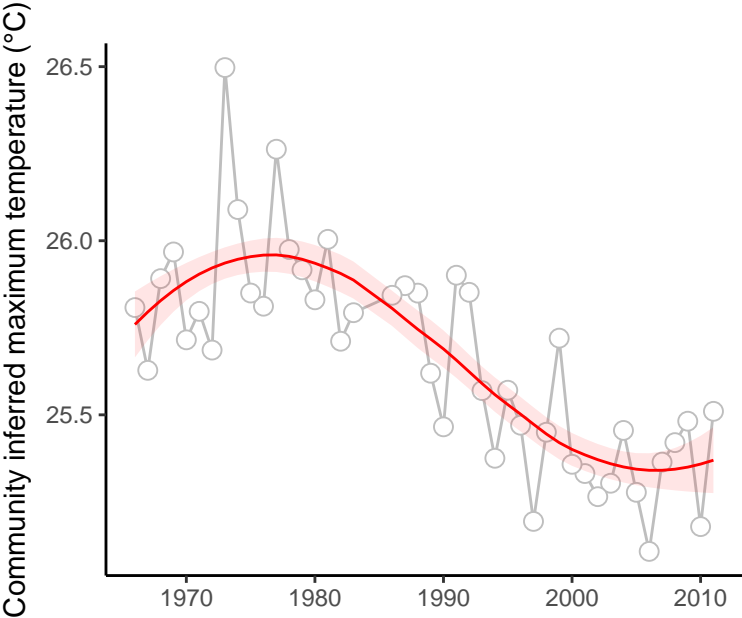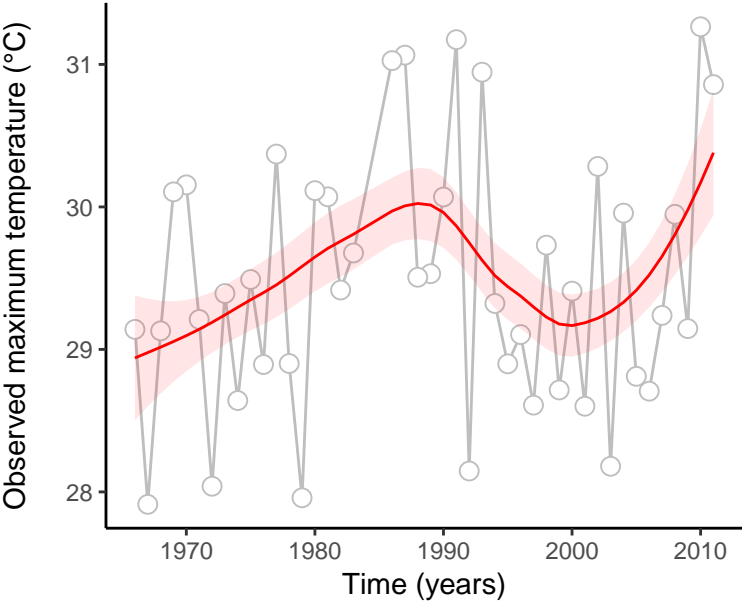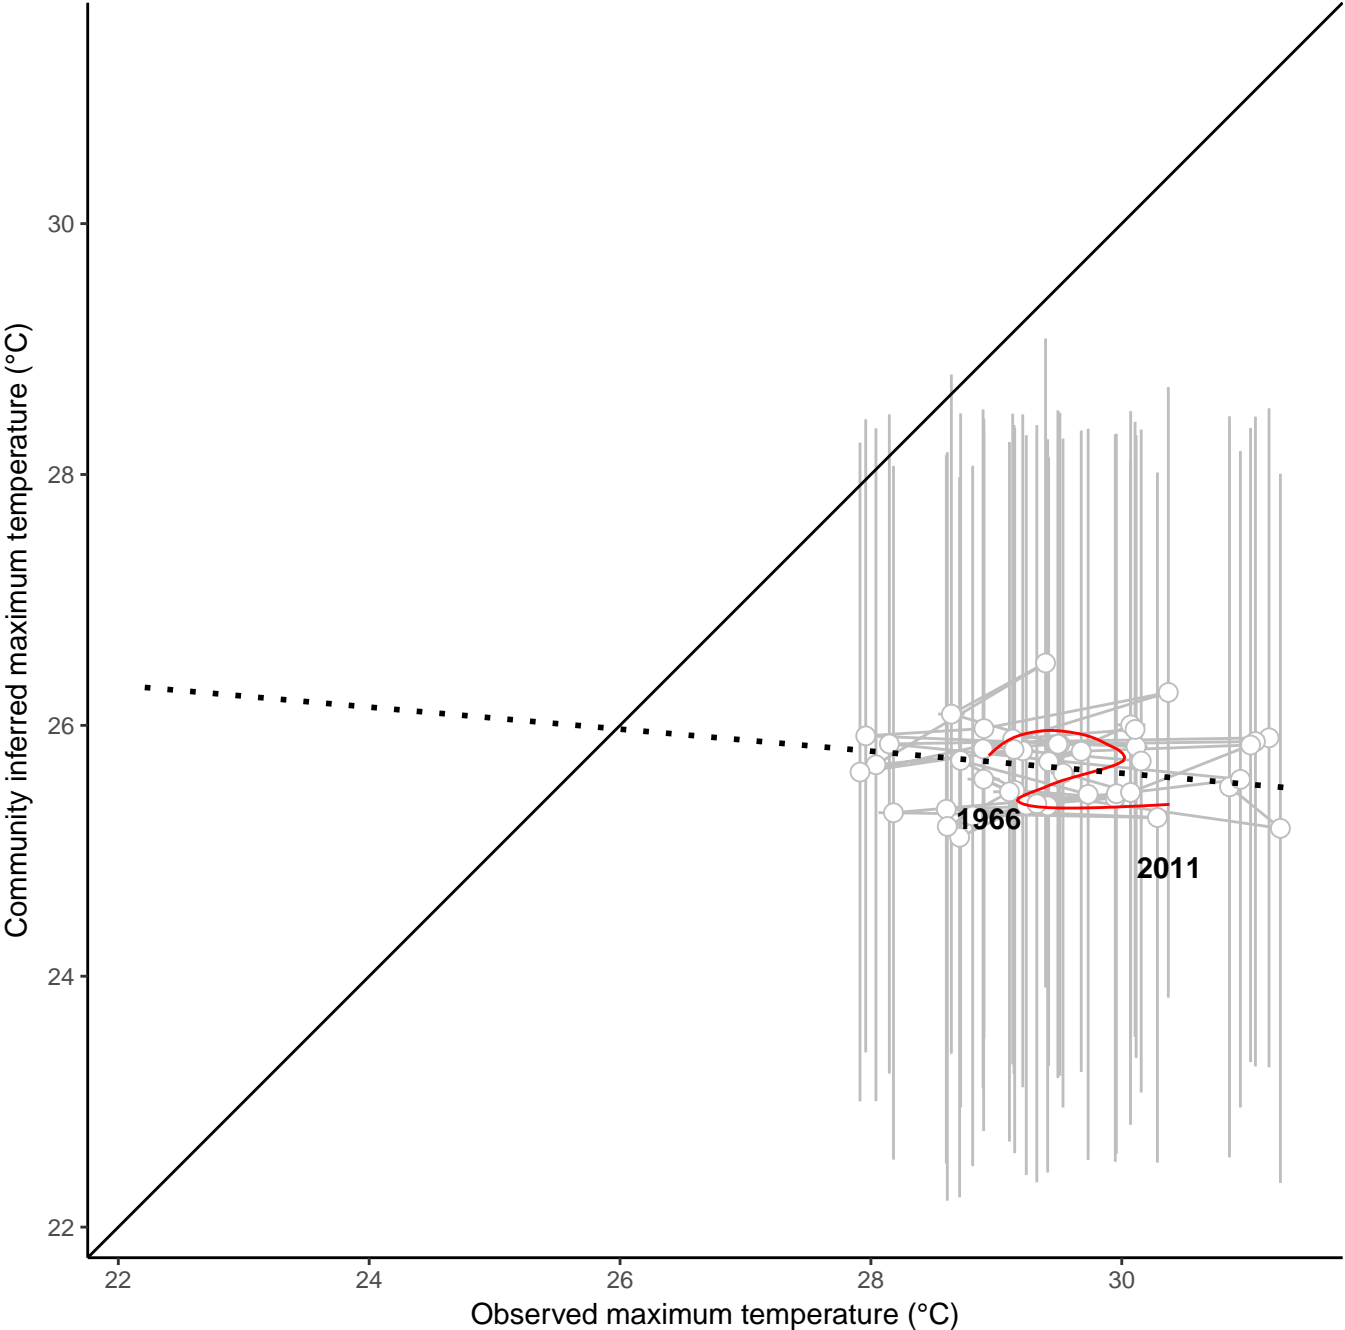



site : 840\_66\_34

absolute deviation = 1.98 | deviation change = 1.2 | maximum state number = 1

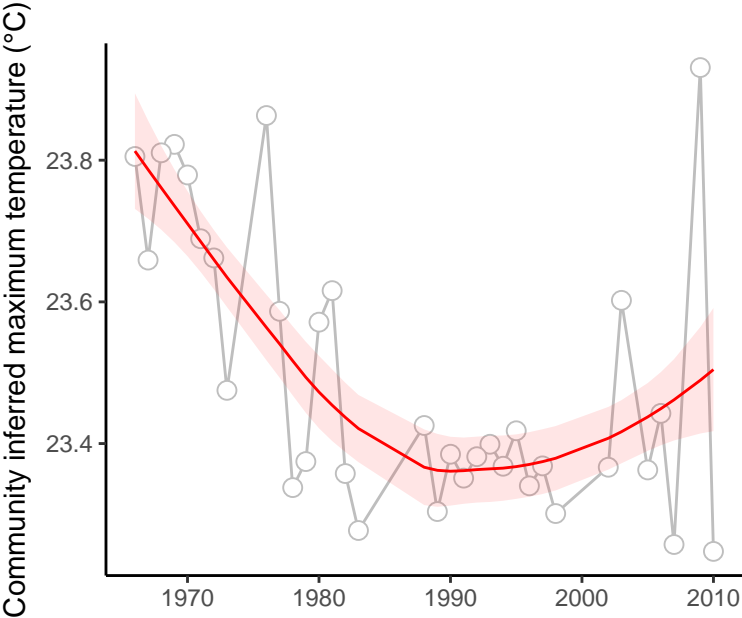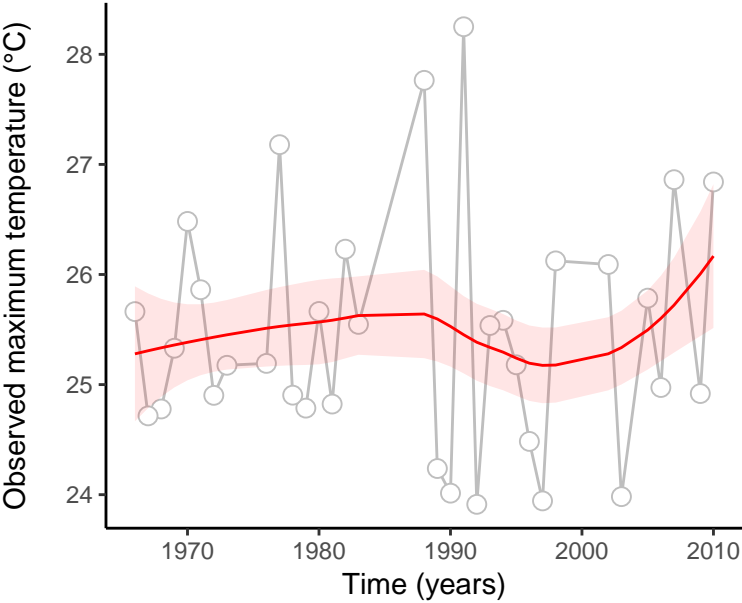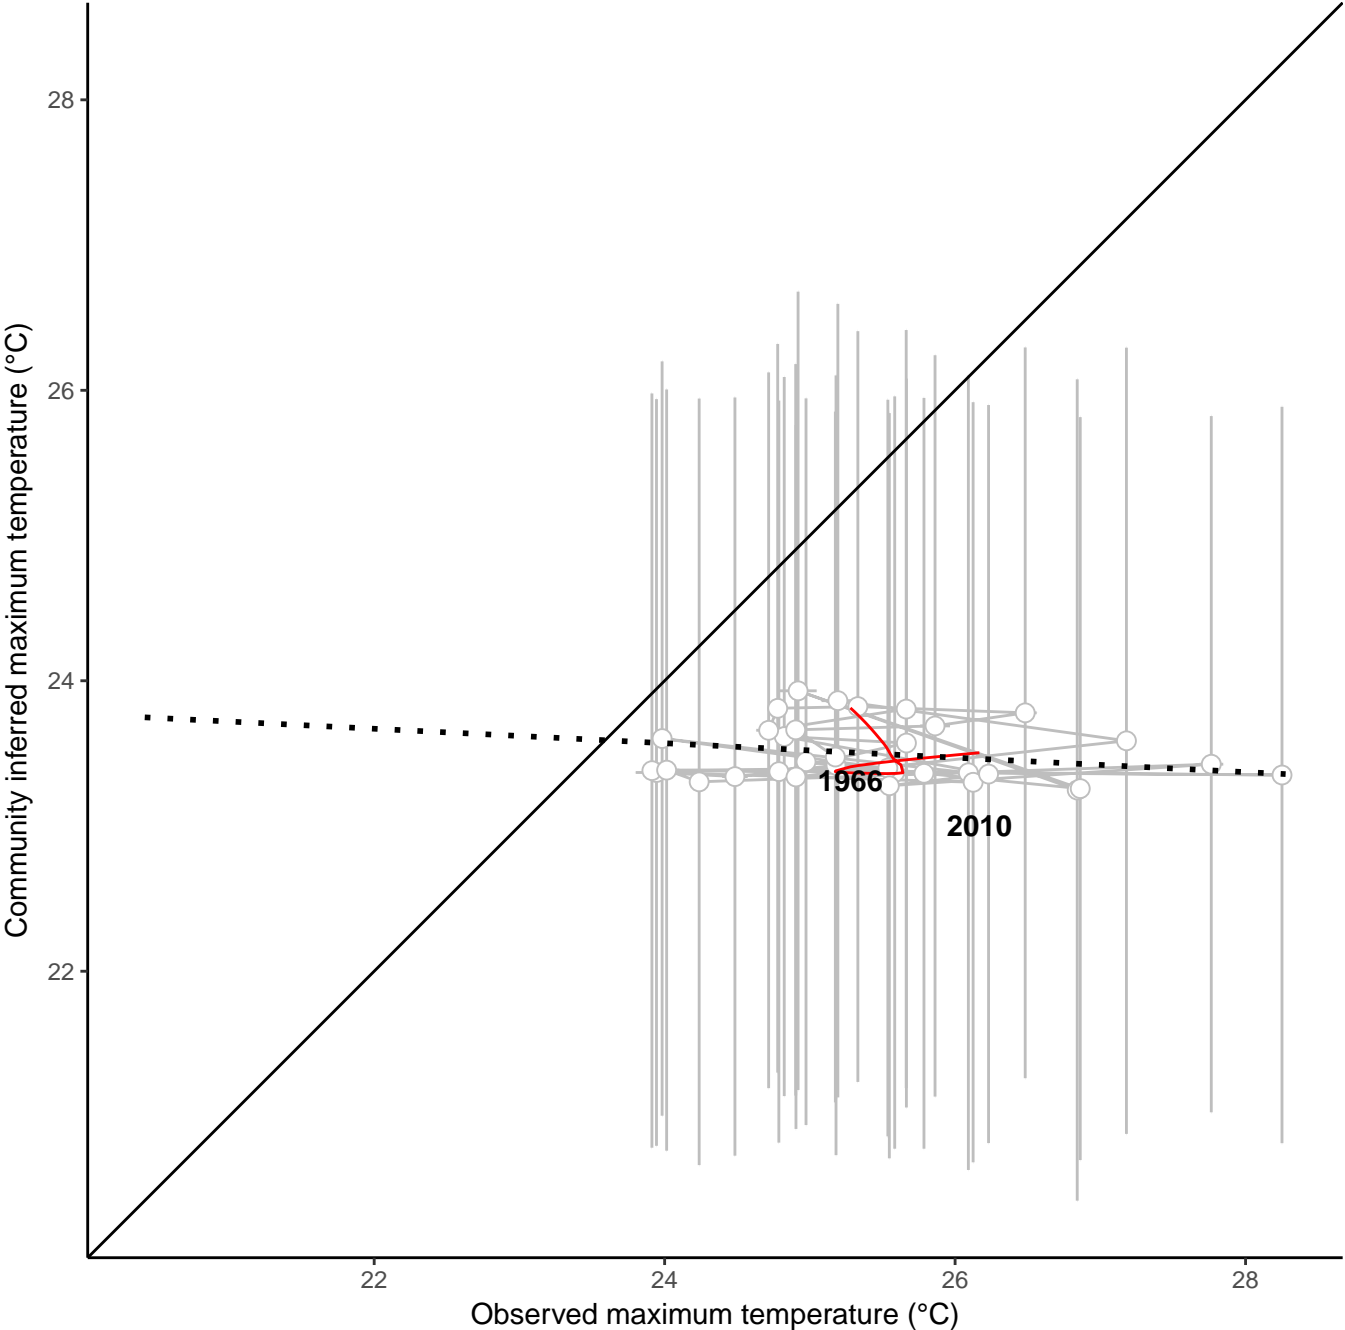

site : 840\_72\_63

absolute deviation = 0.92 | deviation change = 1.09 | maximum state number = 1

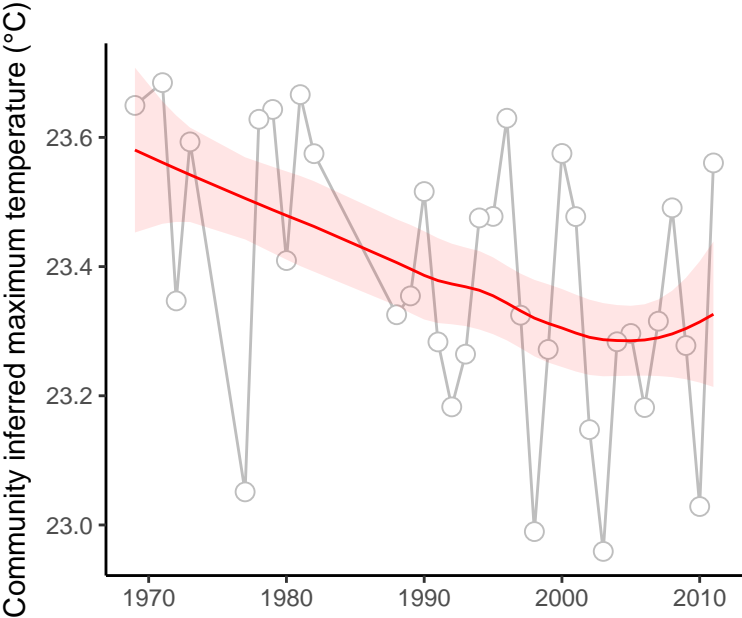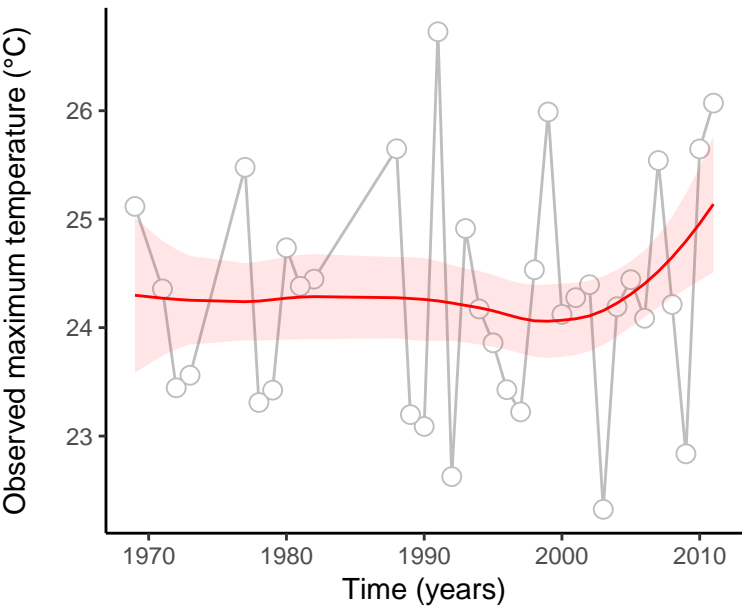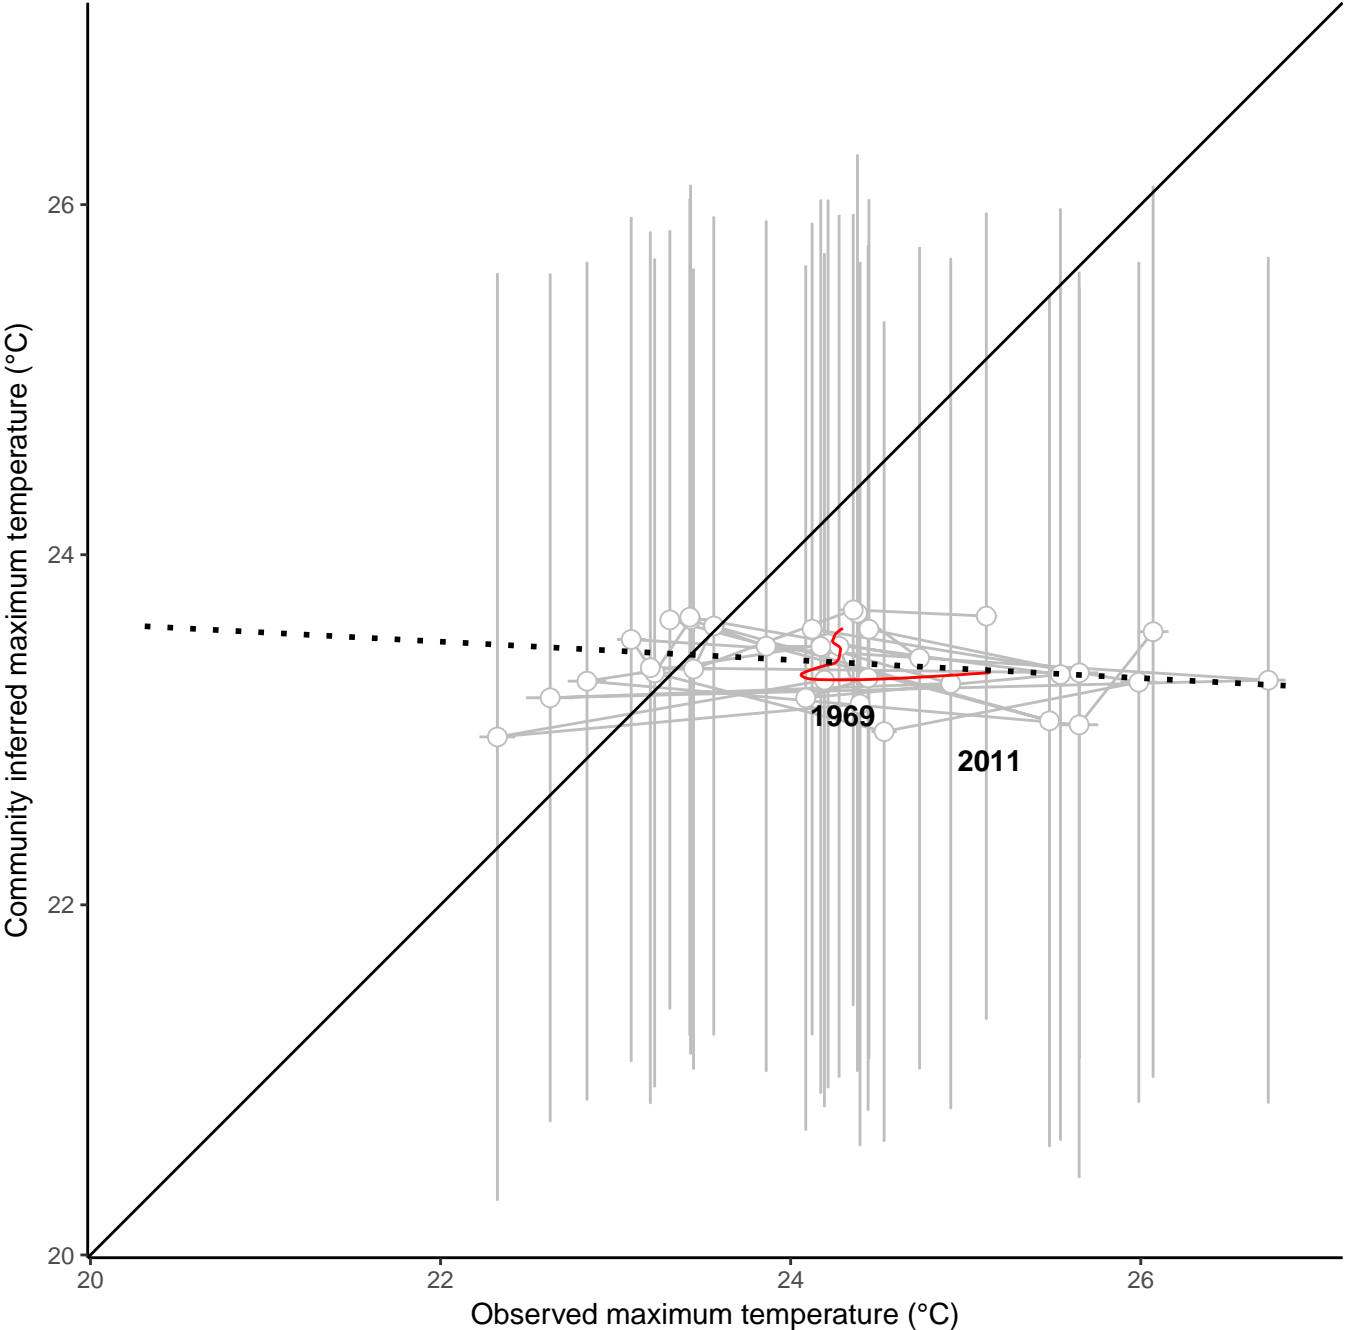

site : 840\_82\_15

absolute deviation = 3.58 | deviation change = 0.41 | maximum state number = 1

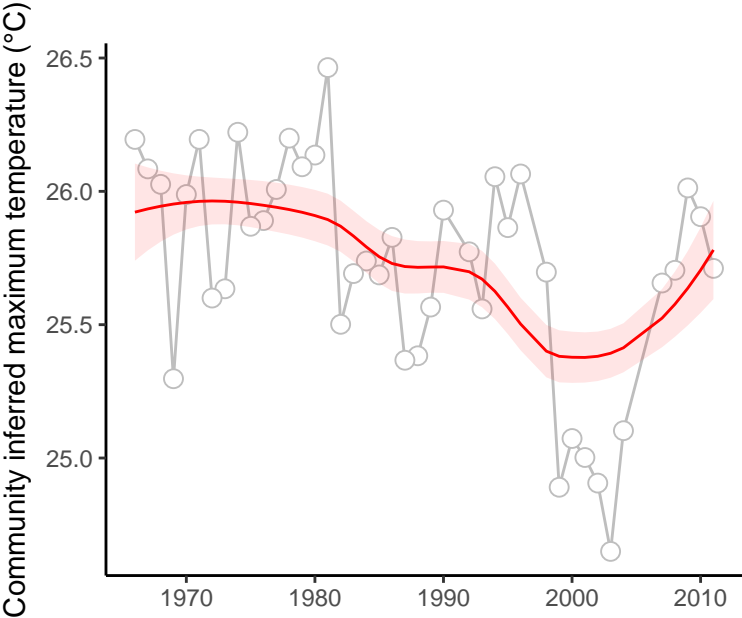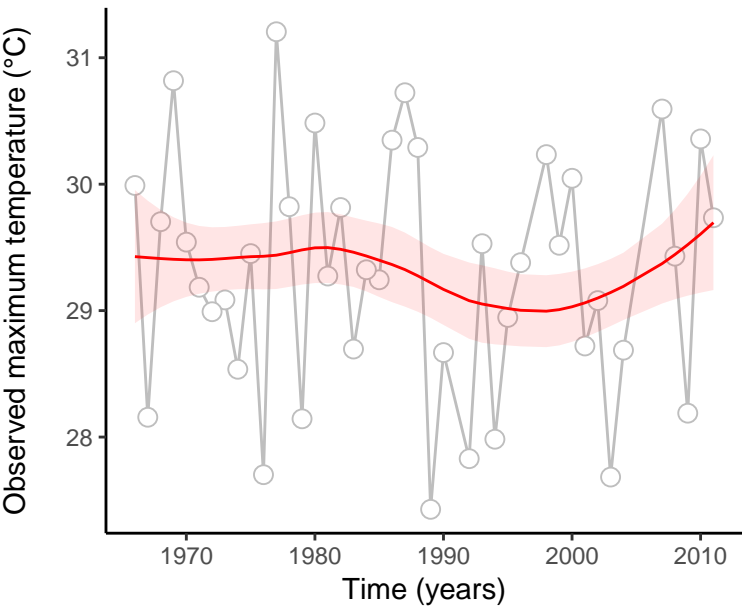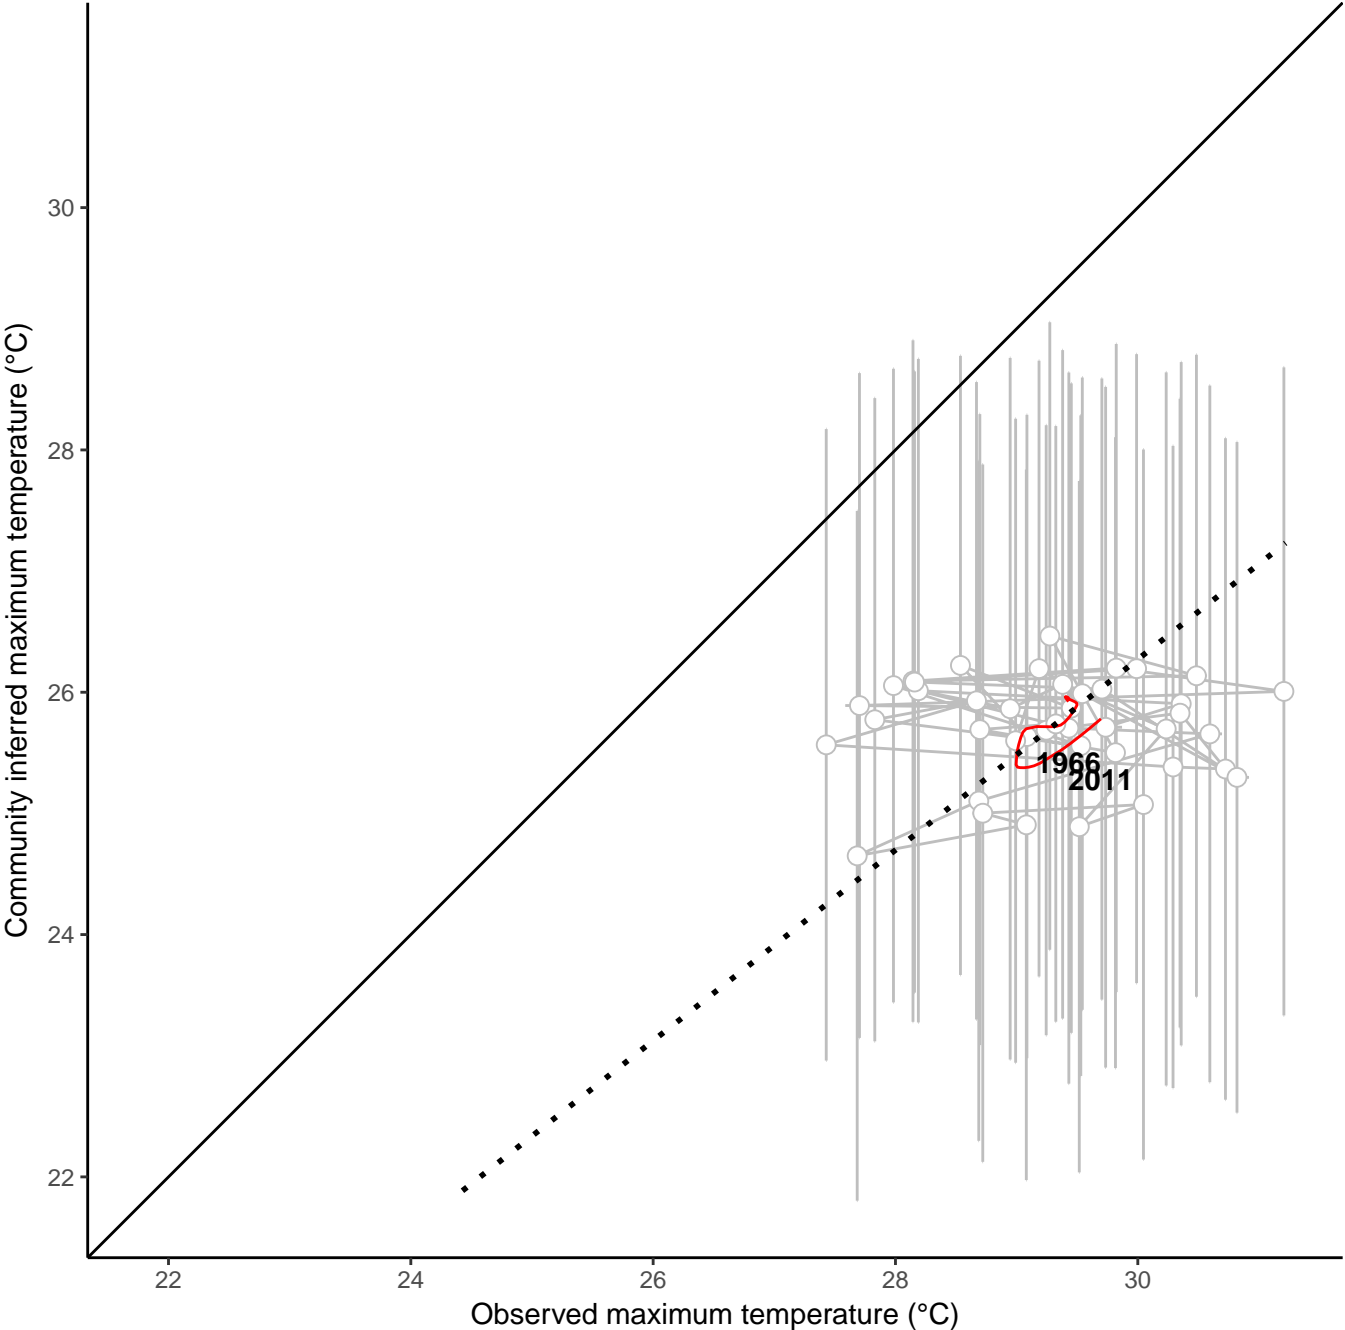

site : 840\_83\_2

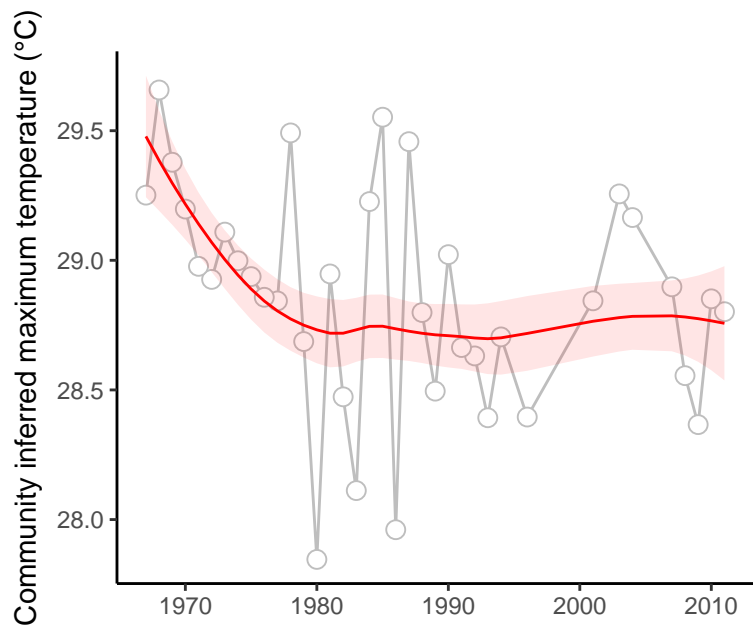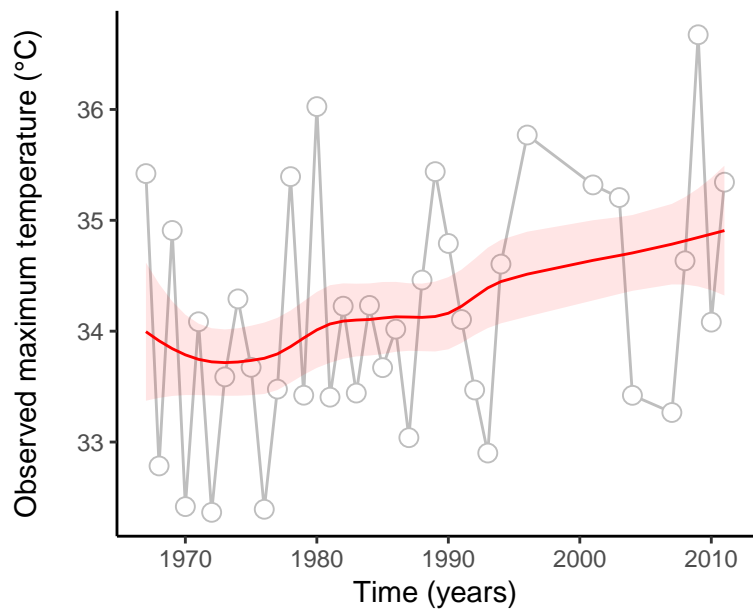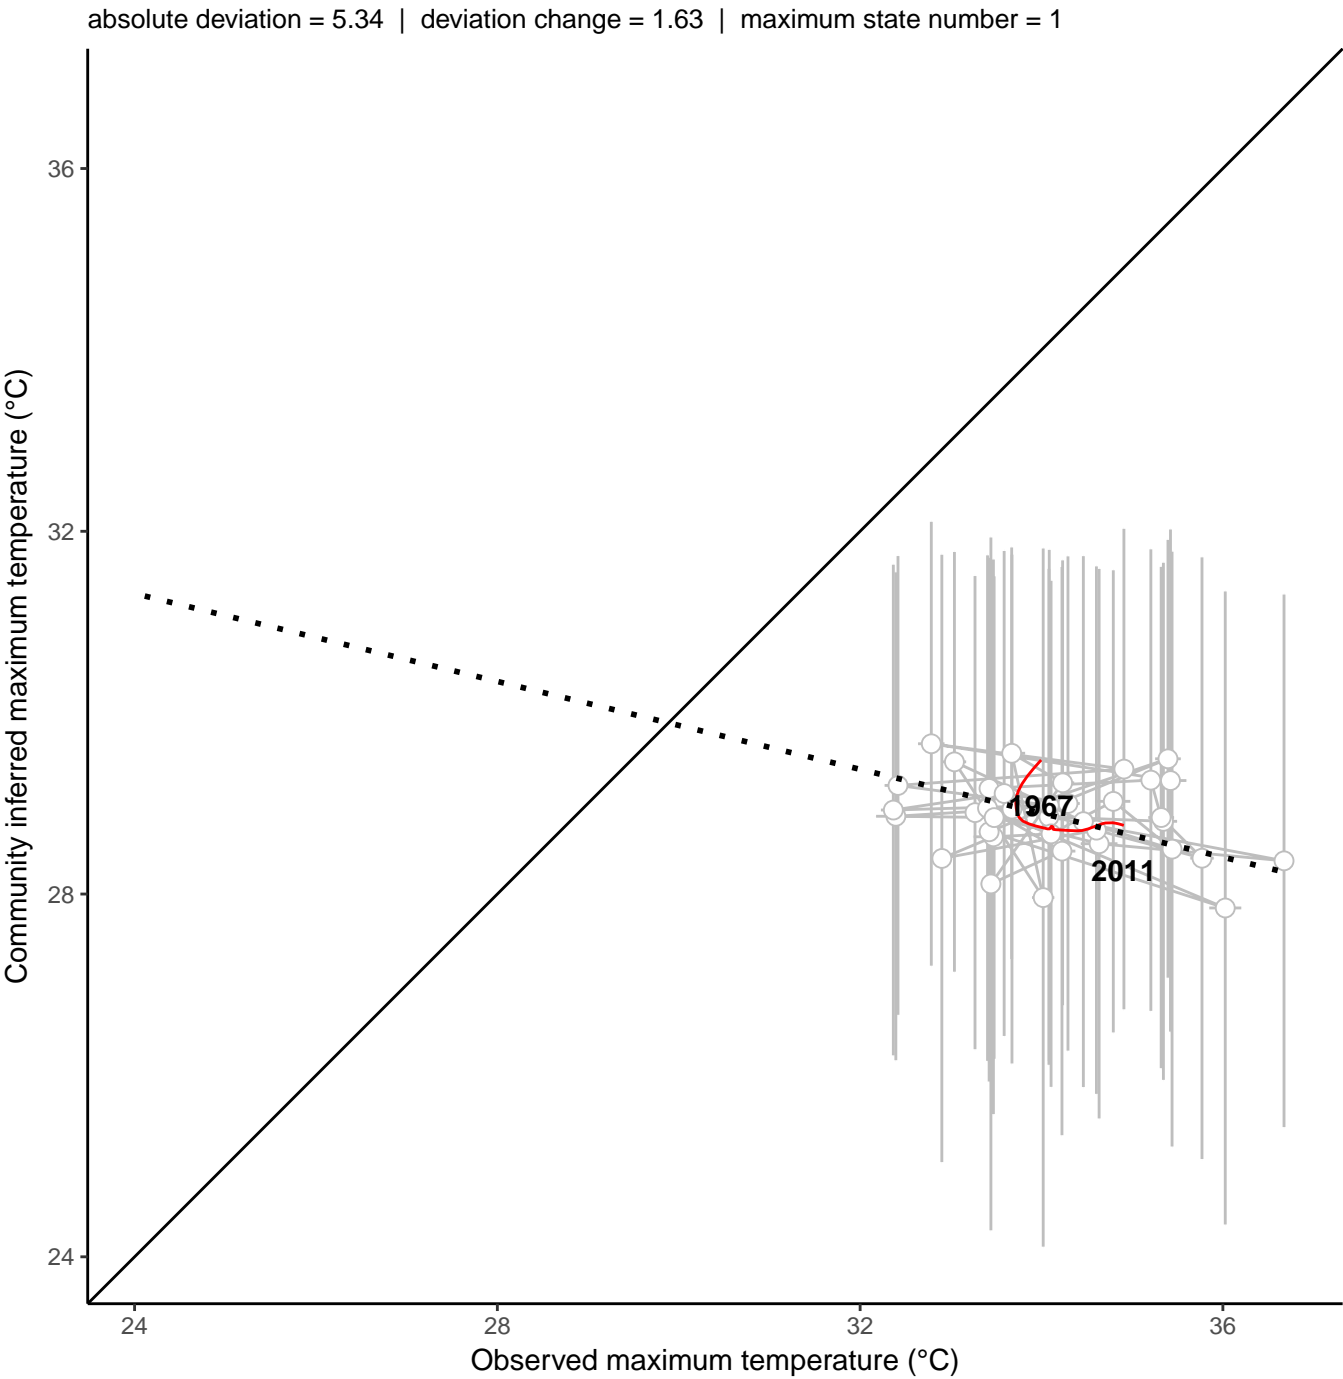

site : 840\_87\_23

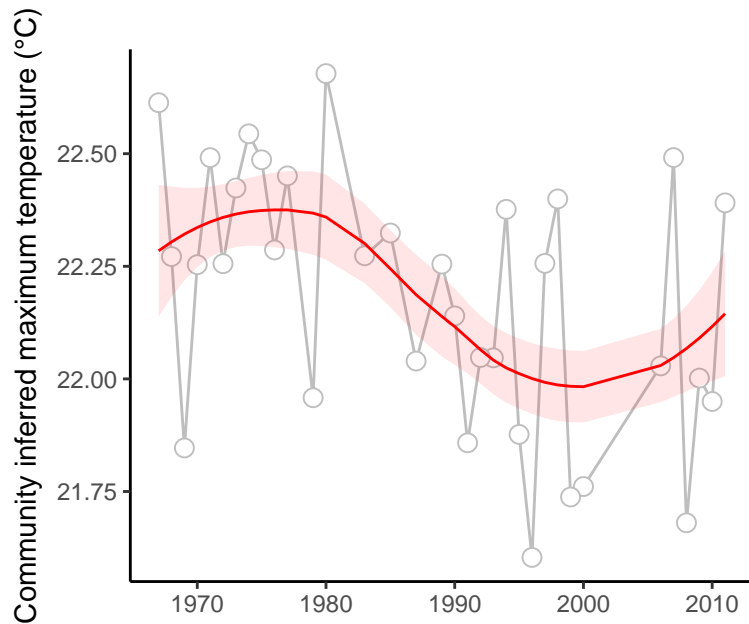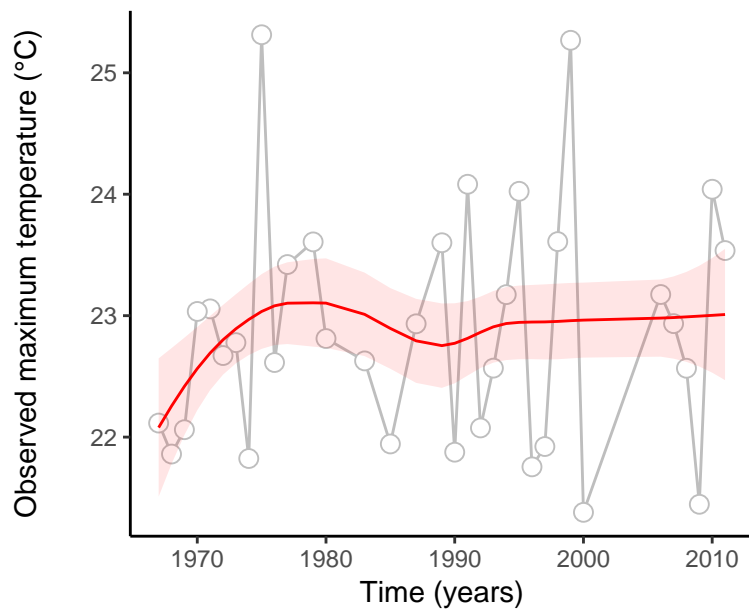

absolute deviation = 0.69 | deviation change = 0.66 | maximum state number = 1

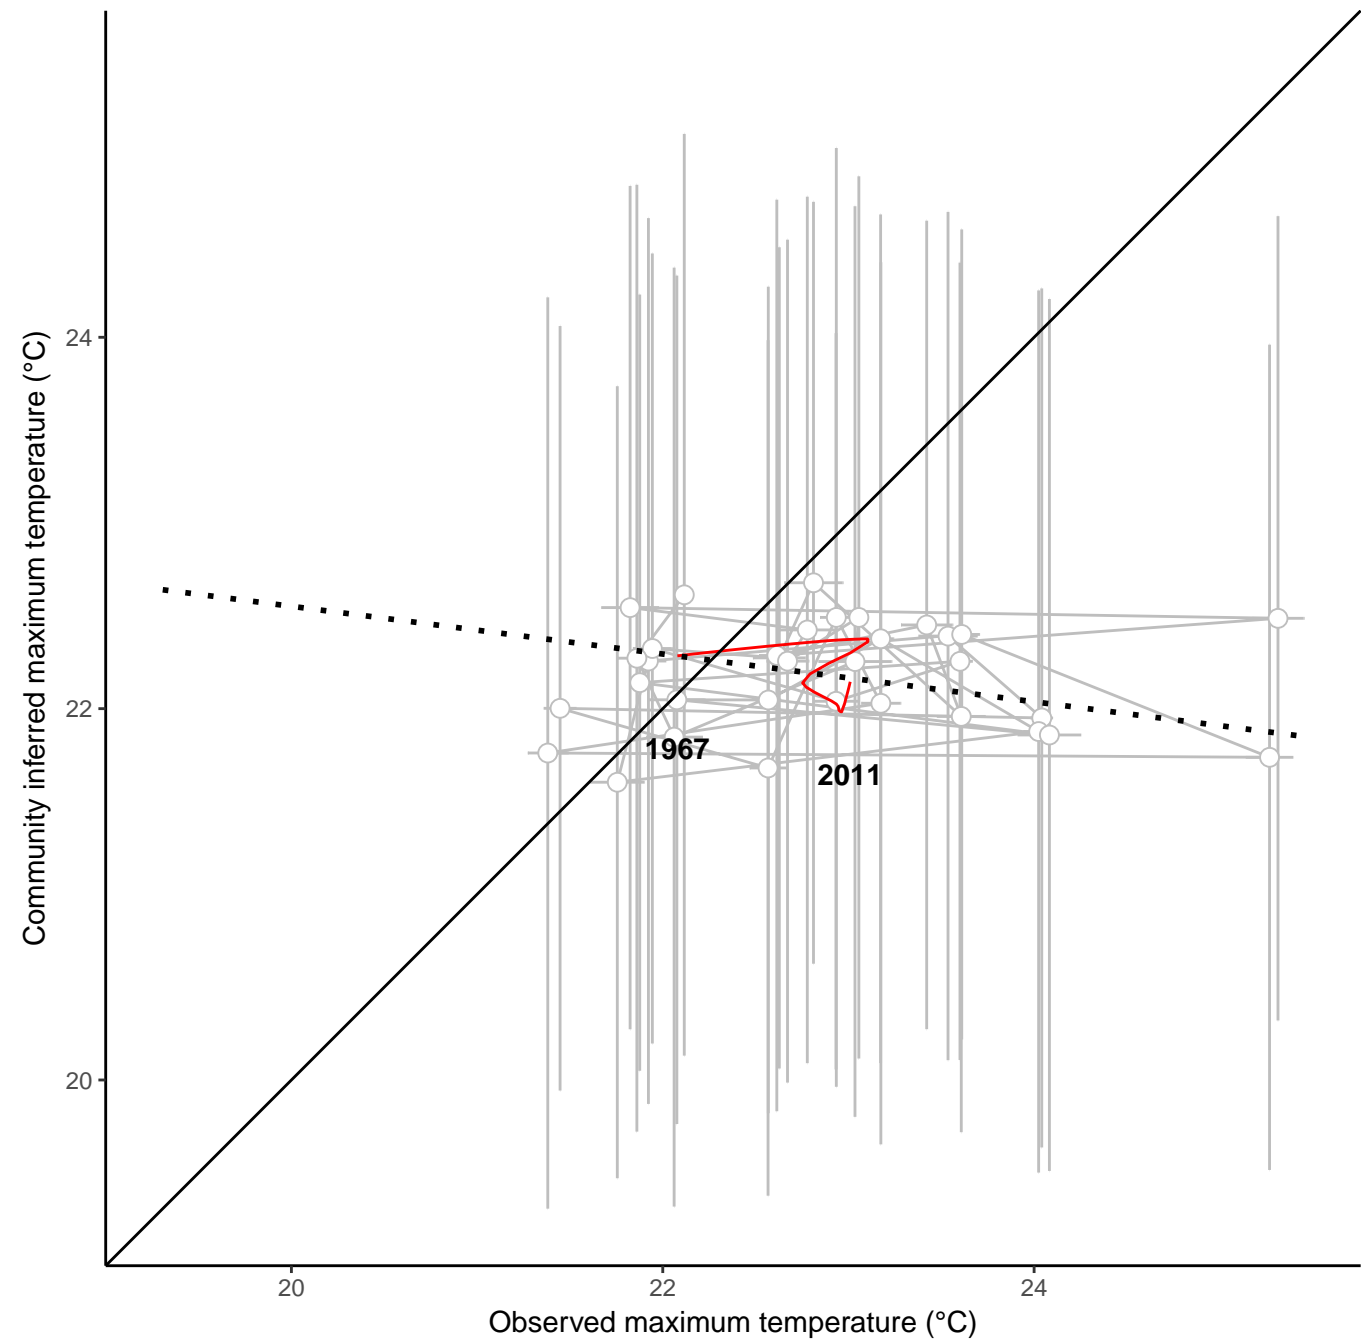

site : 840\_89\_16

absolute deviation = 1.63 | deviation change = -2.08 | maximum state number = 1

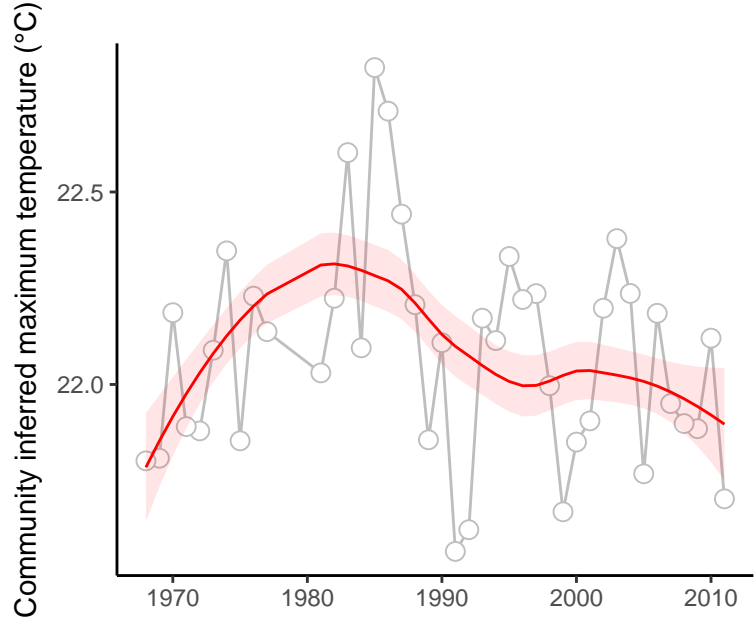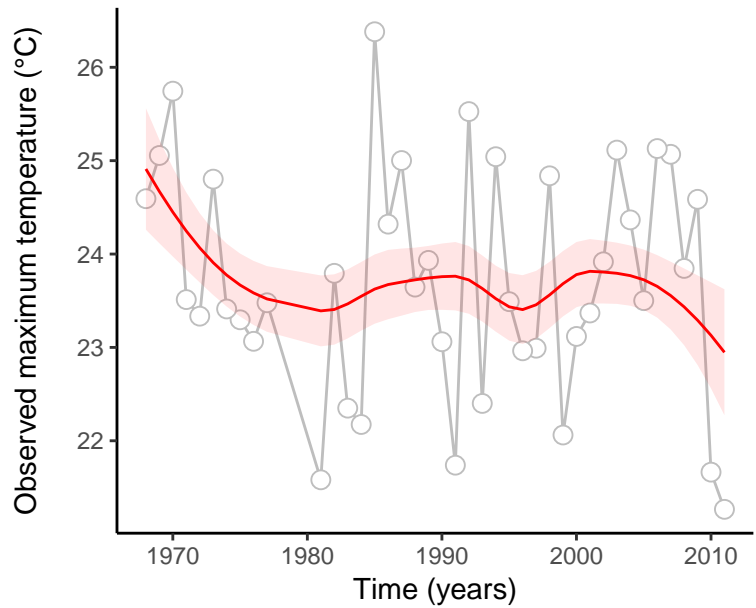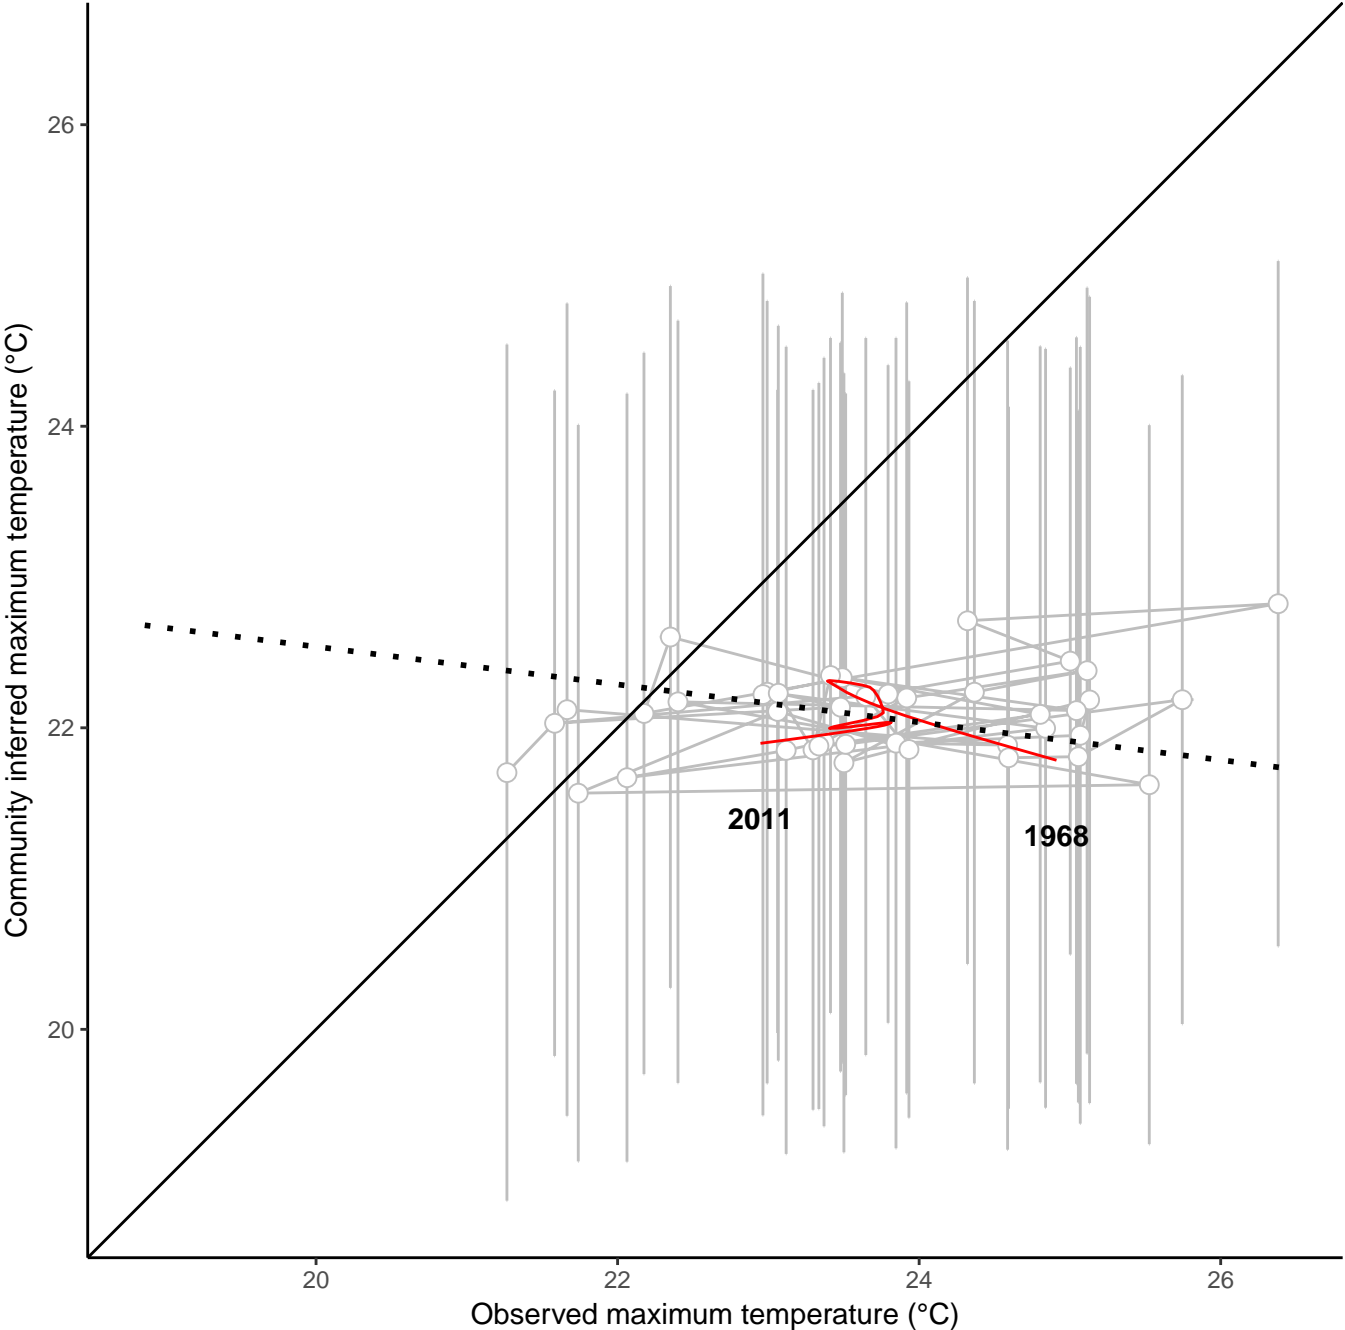

site : 840\_91\_5

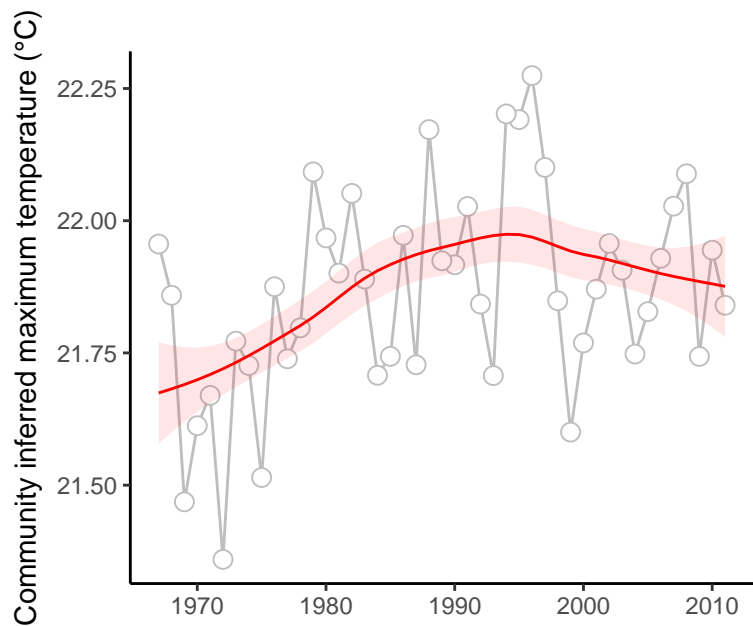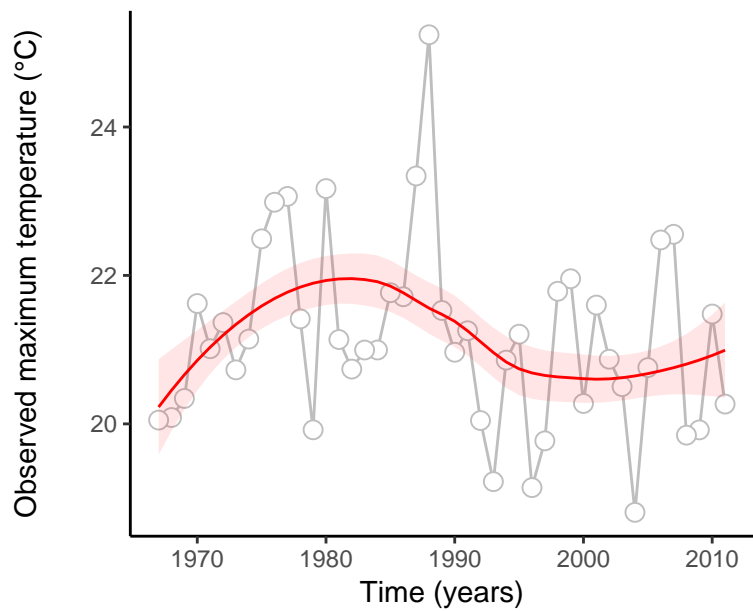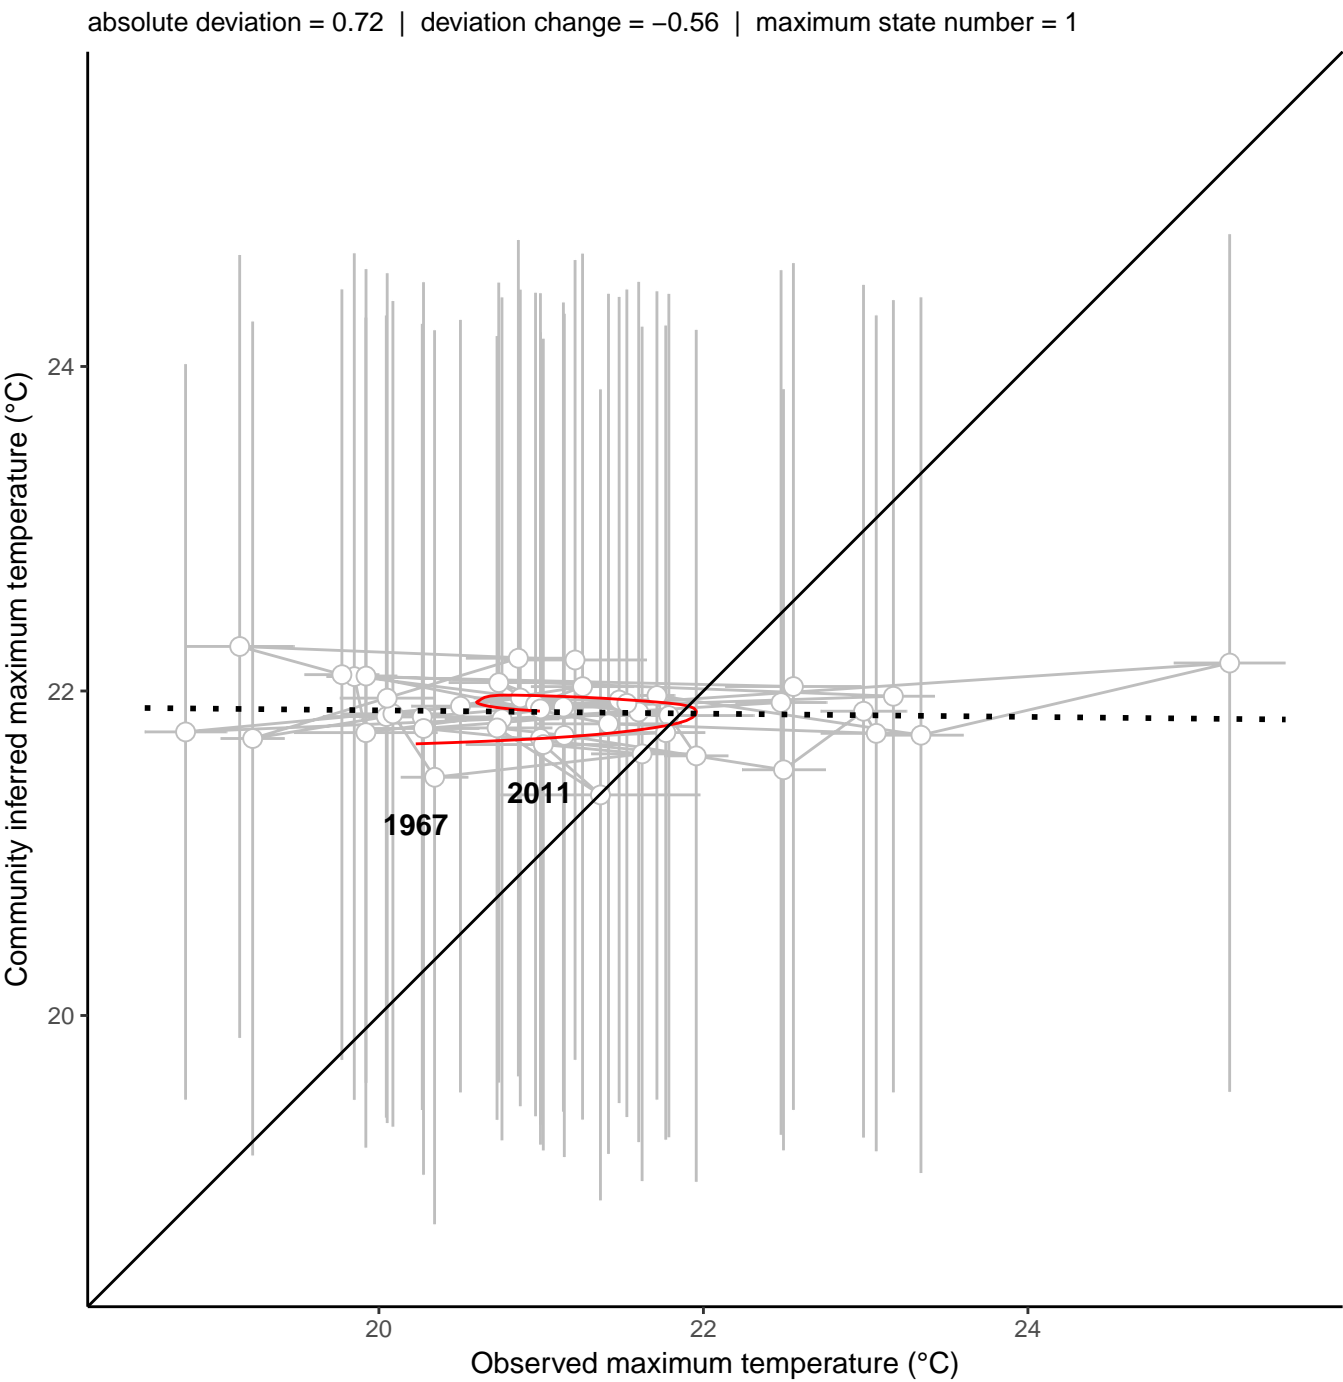

site : 840\_91\_65

absolute deviation = 1.87 | deviation change = 1.42 | maximum state number = 1

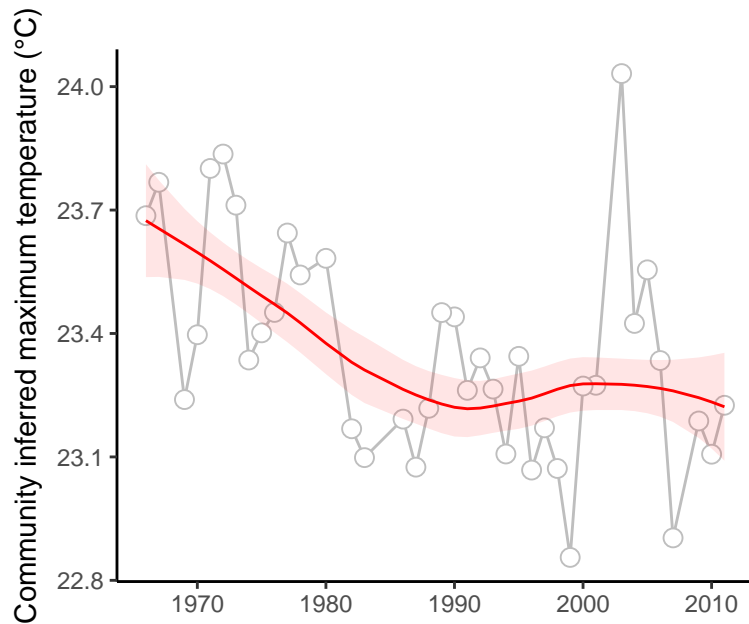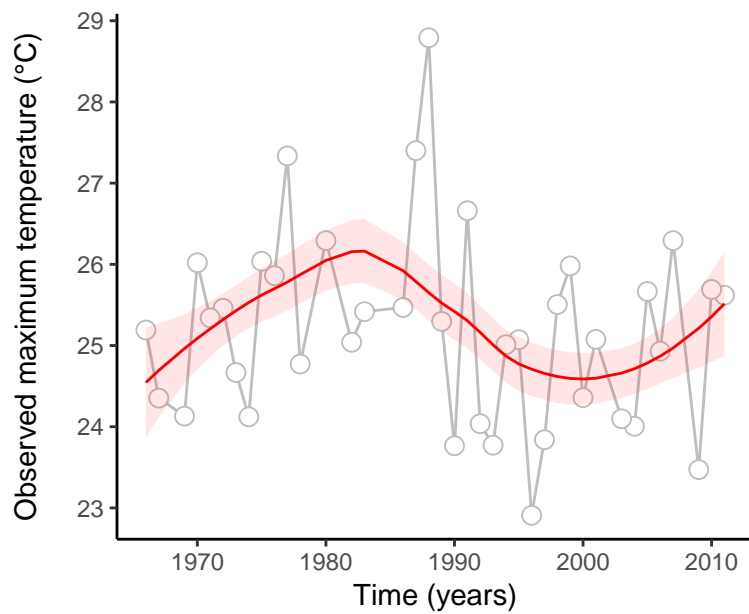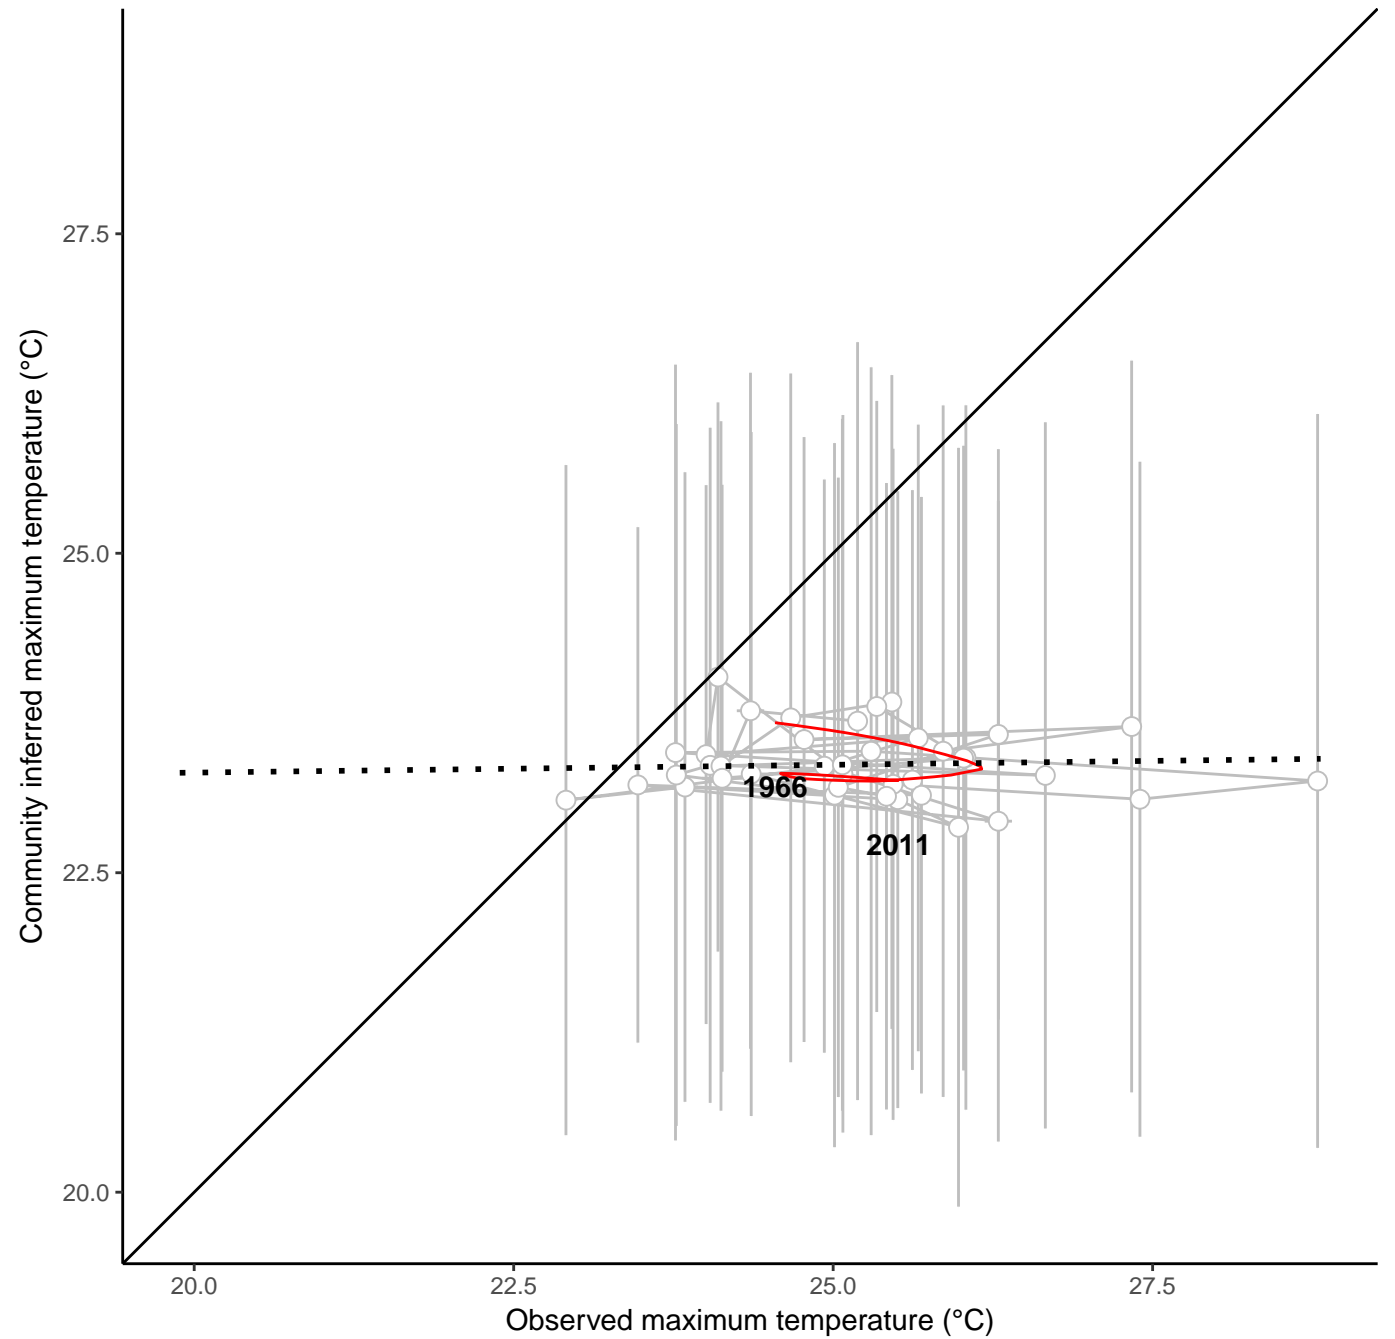



site : 840\_91\_70

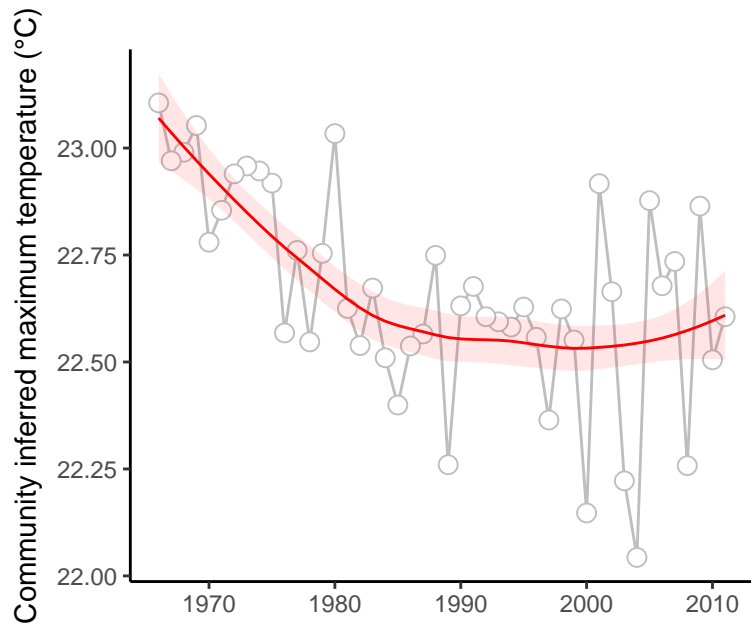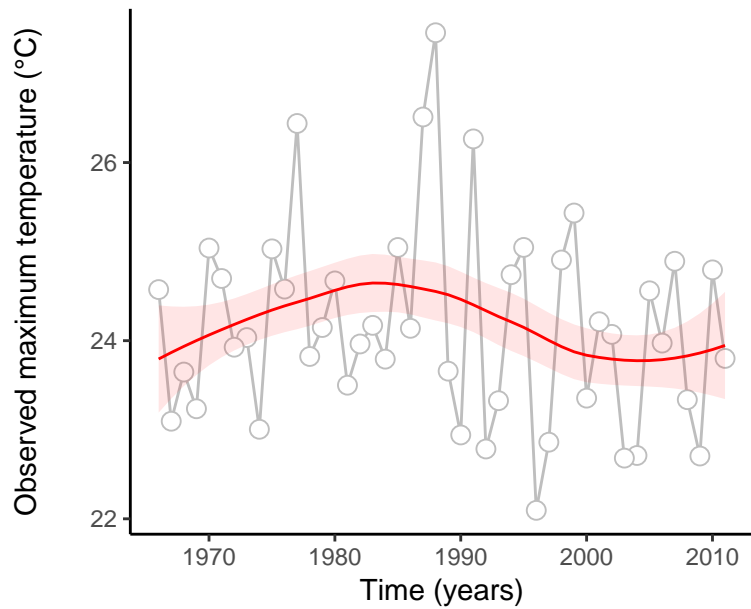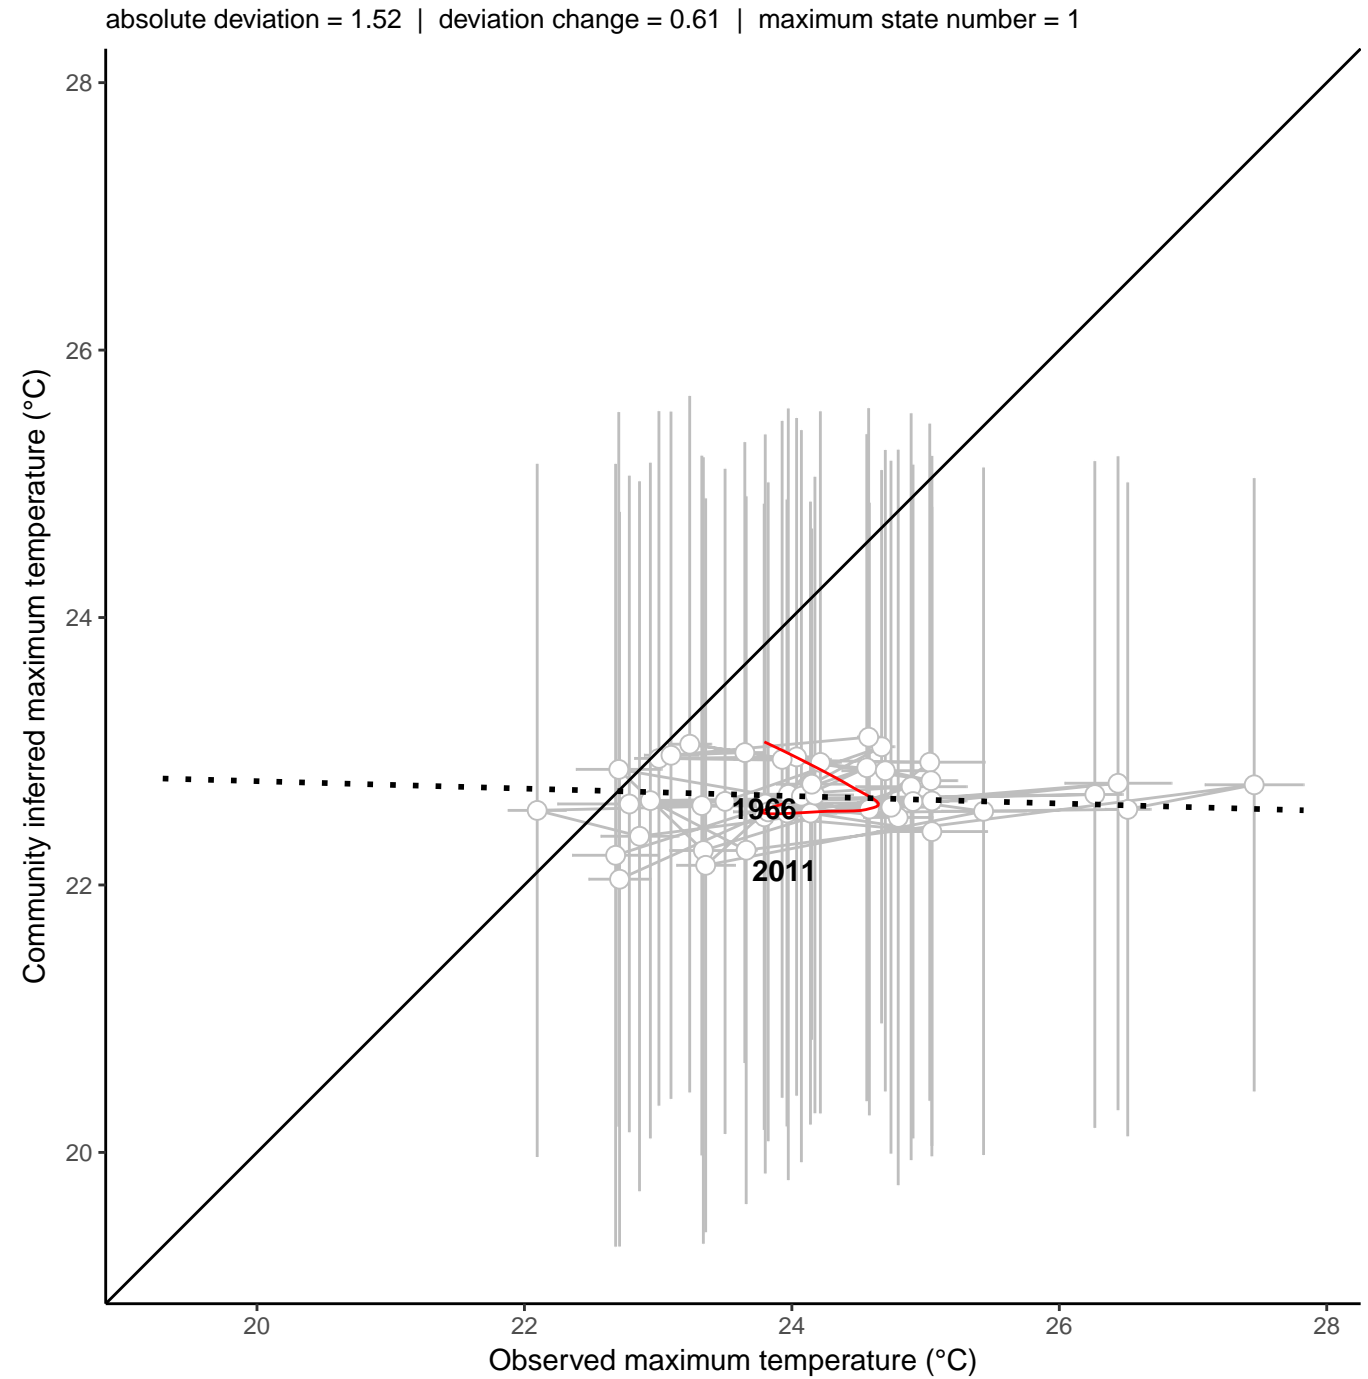

site : 840\_25\_21

absolute deviation = 5.08 | deviation change = 0.52 | maximum state number = 1

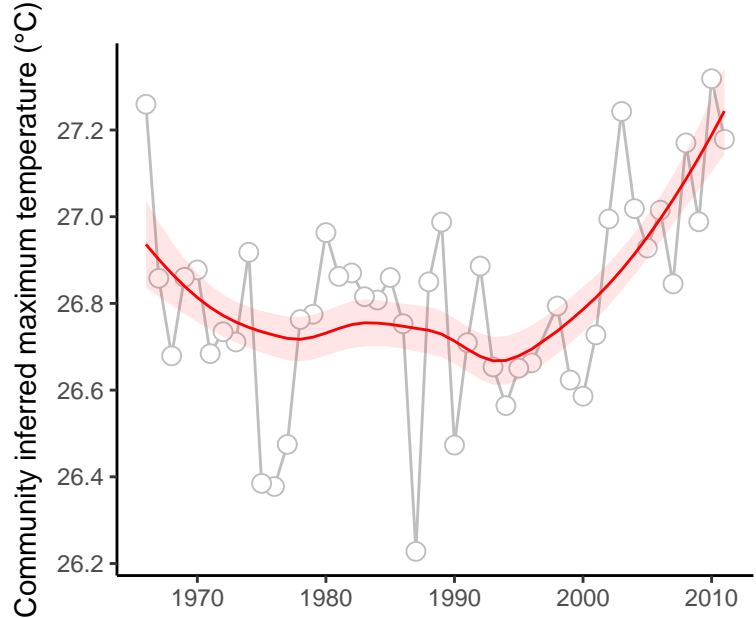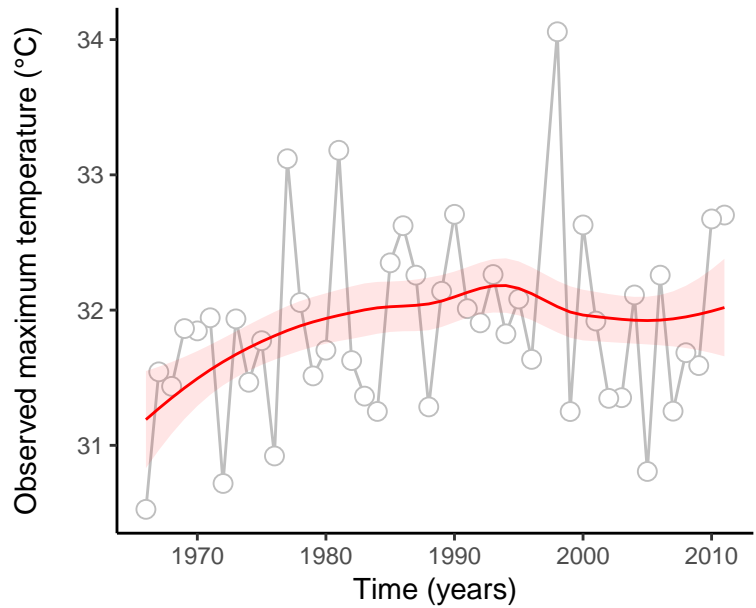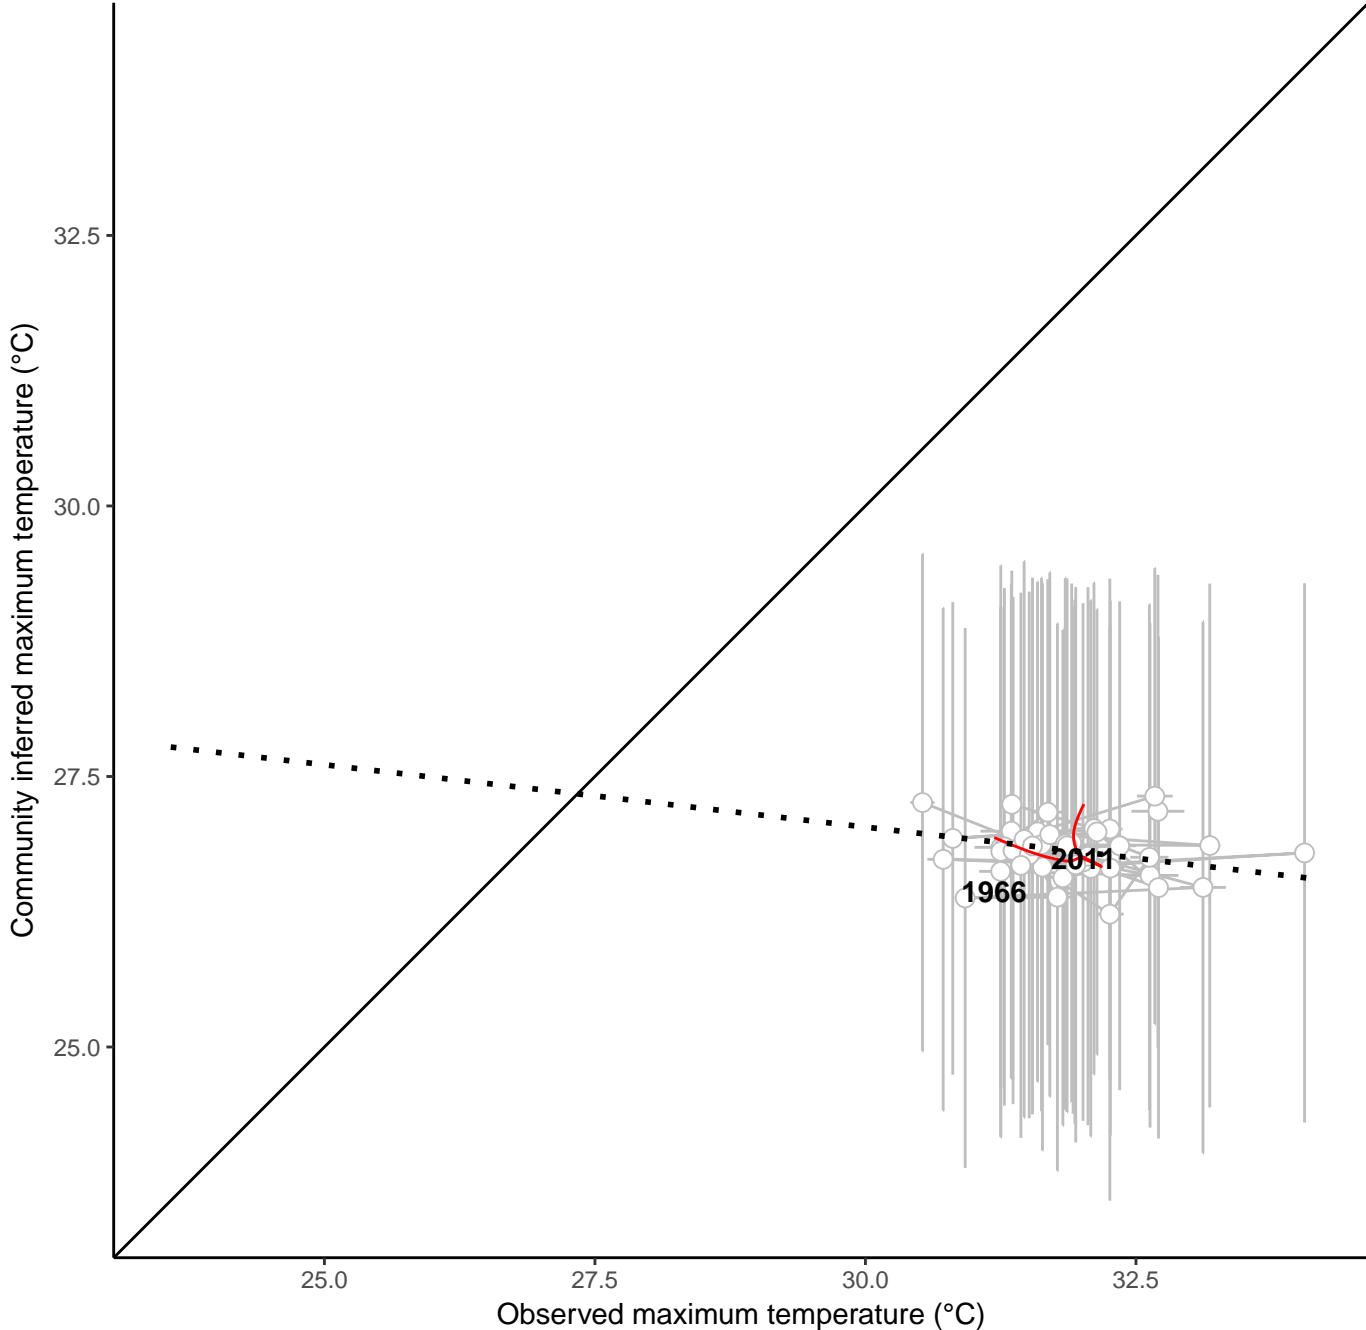

site : 840\_25\_23

absolute deviation = 5.34 | deviation change = 1.04 | maximum state number = 2

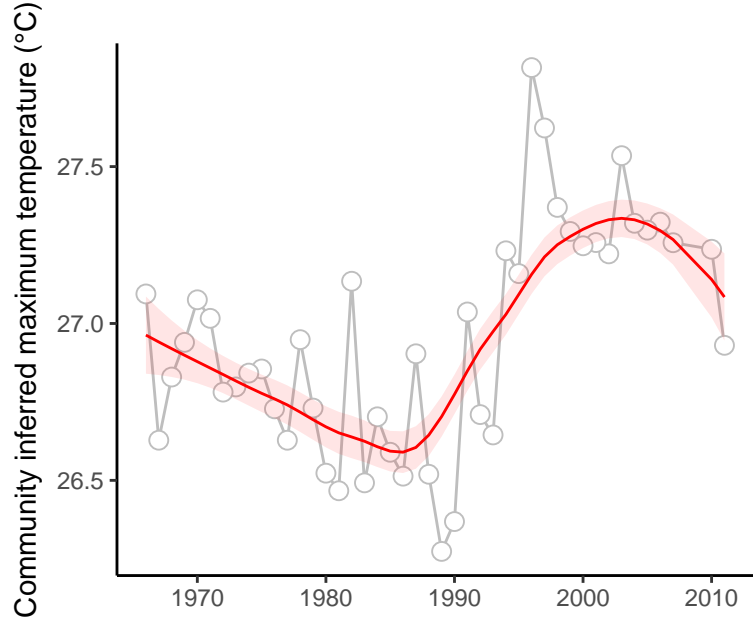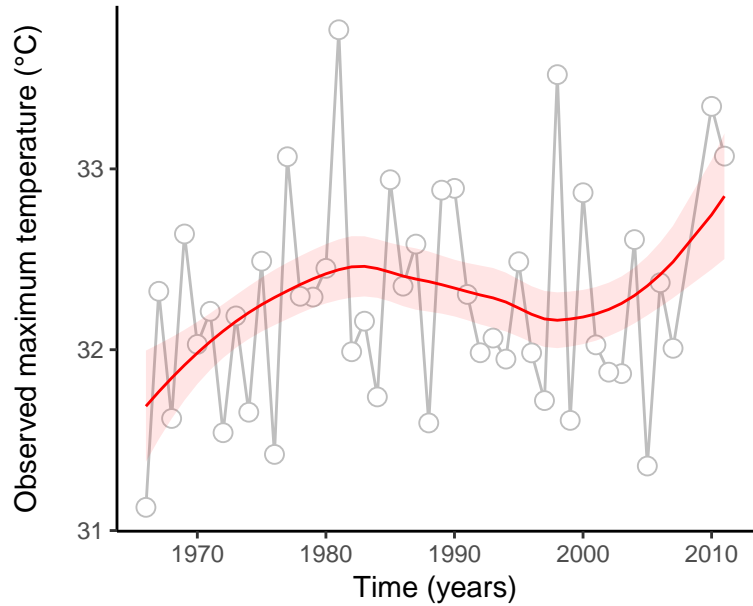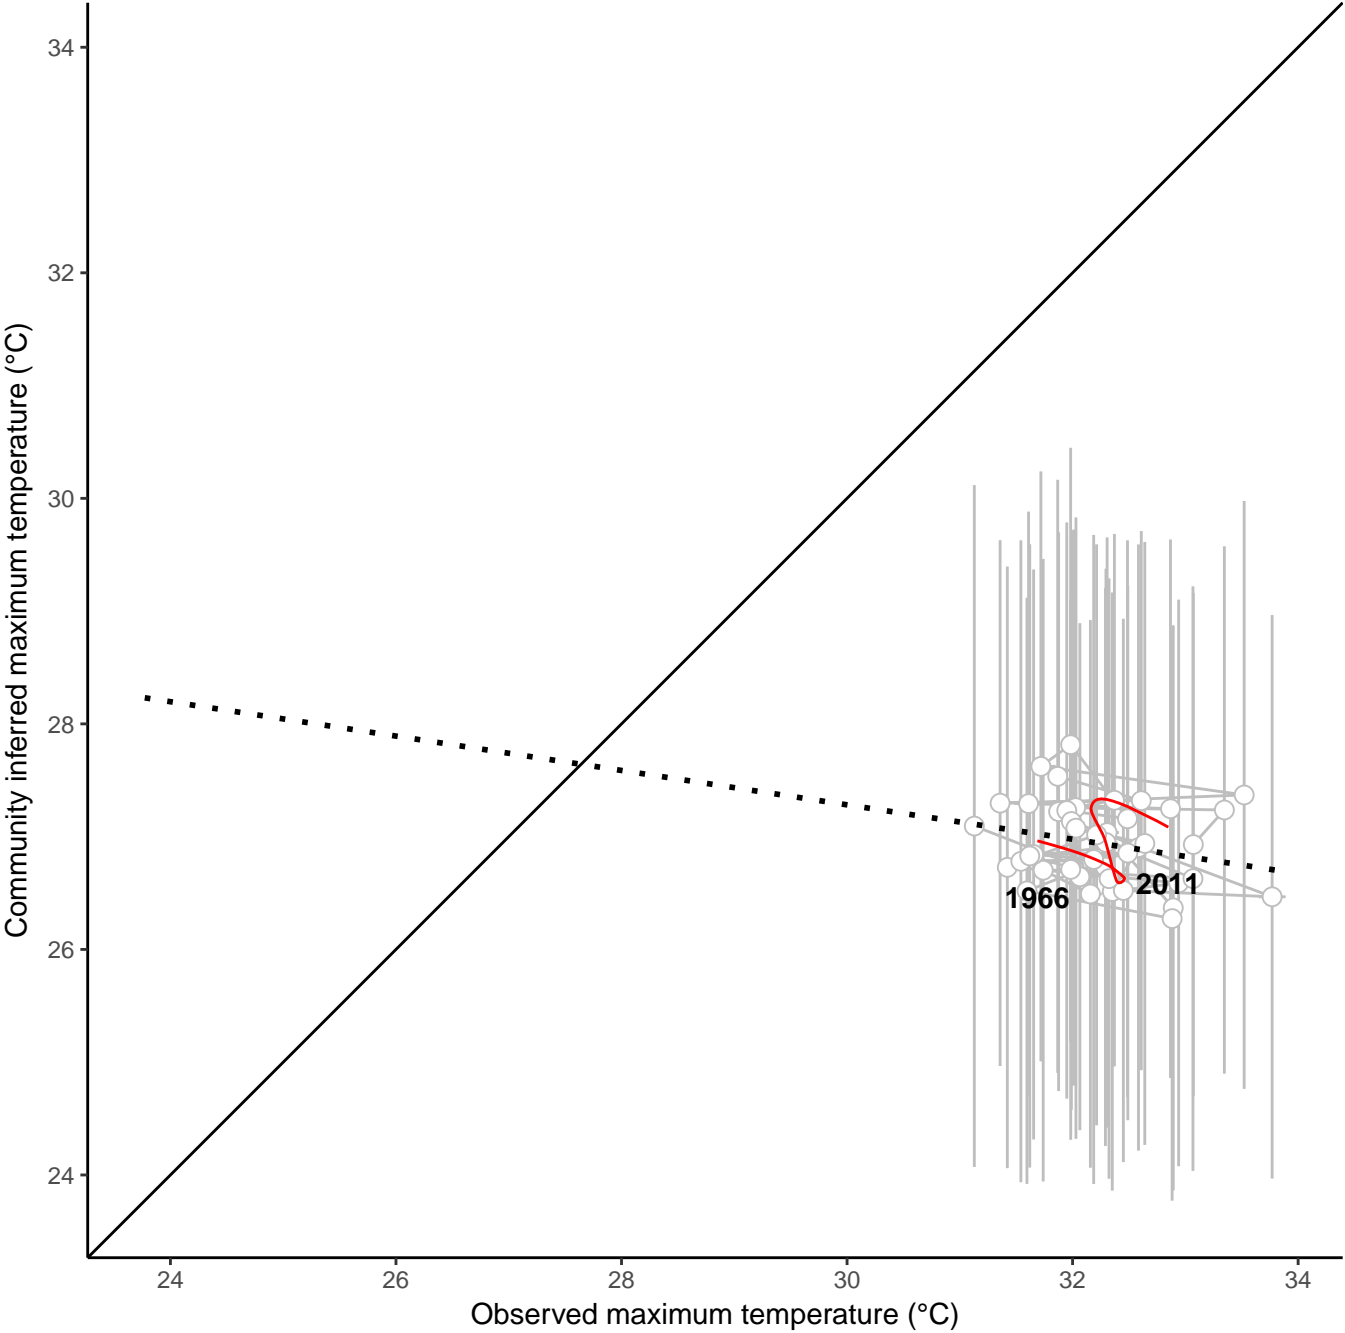

site : 840\_35\_26

absolute deviation = 2.72 | deviation change = 1.07 | maximum state number = 1

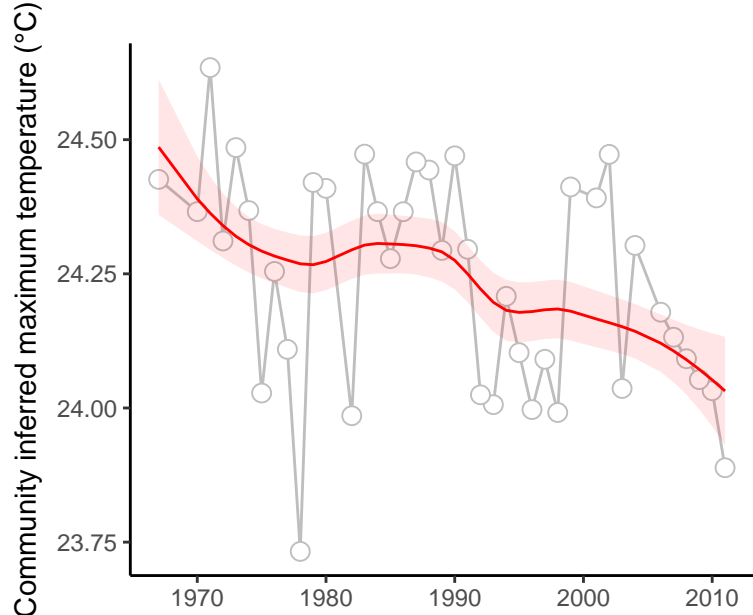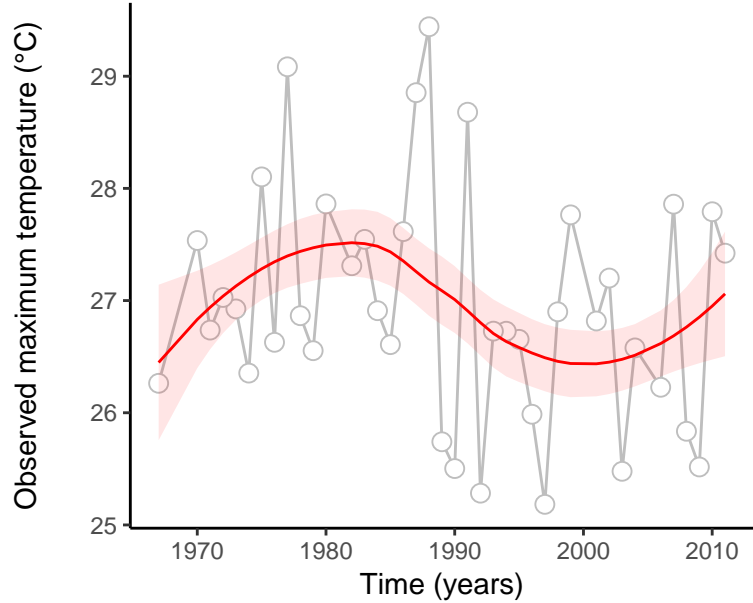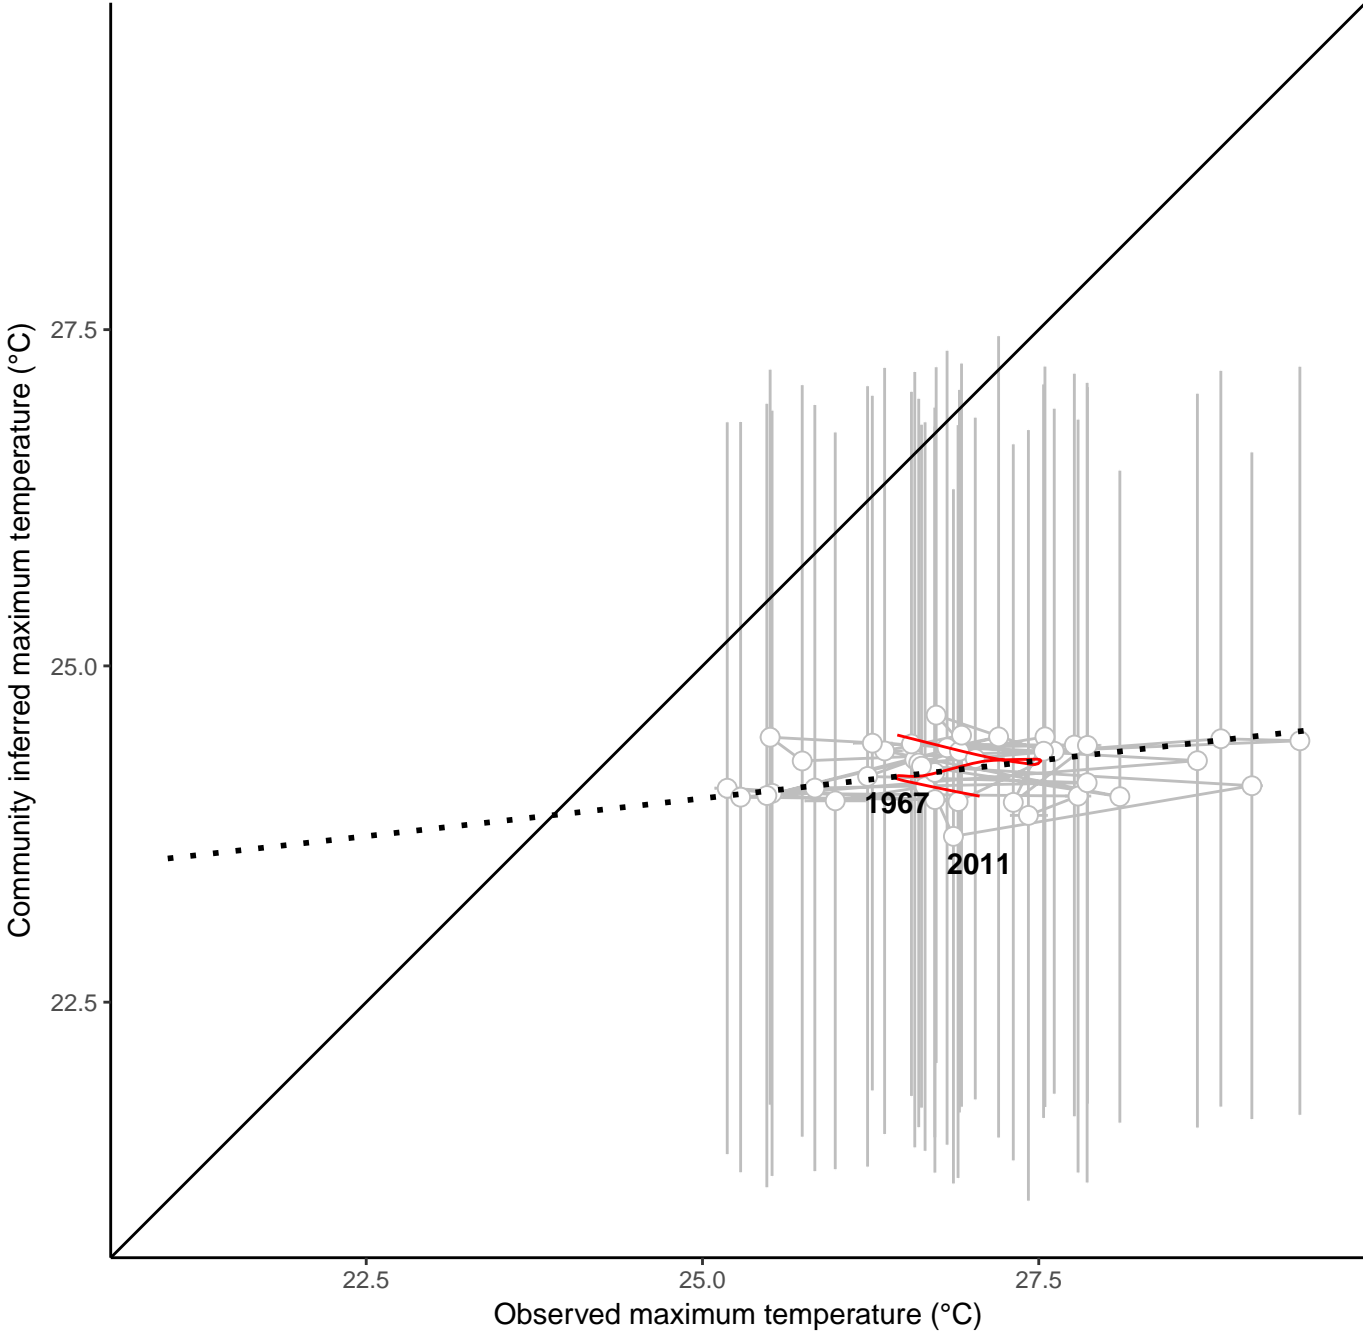

site : 840\_38\_16

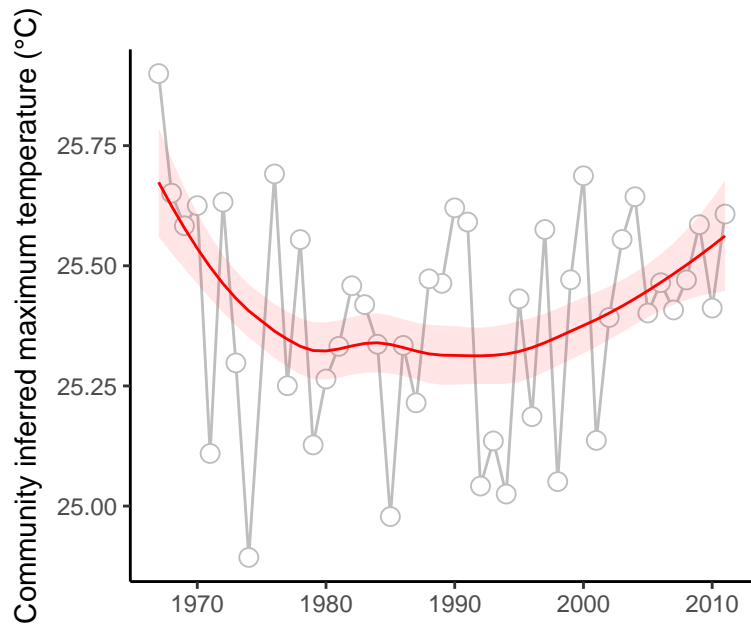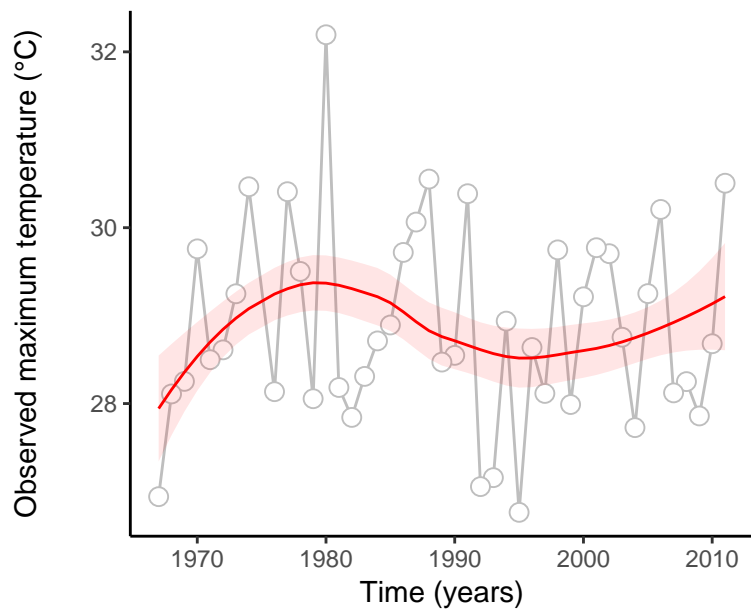

absolute deviation = 3.44 | deviation change = 1.38 | maximum state number = 1

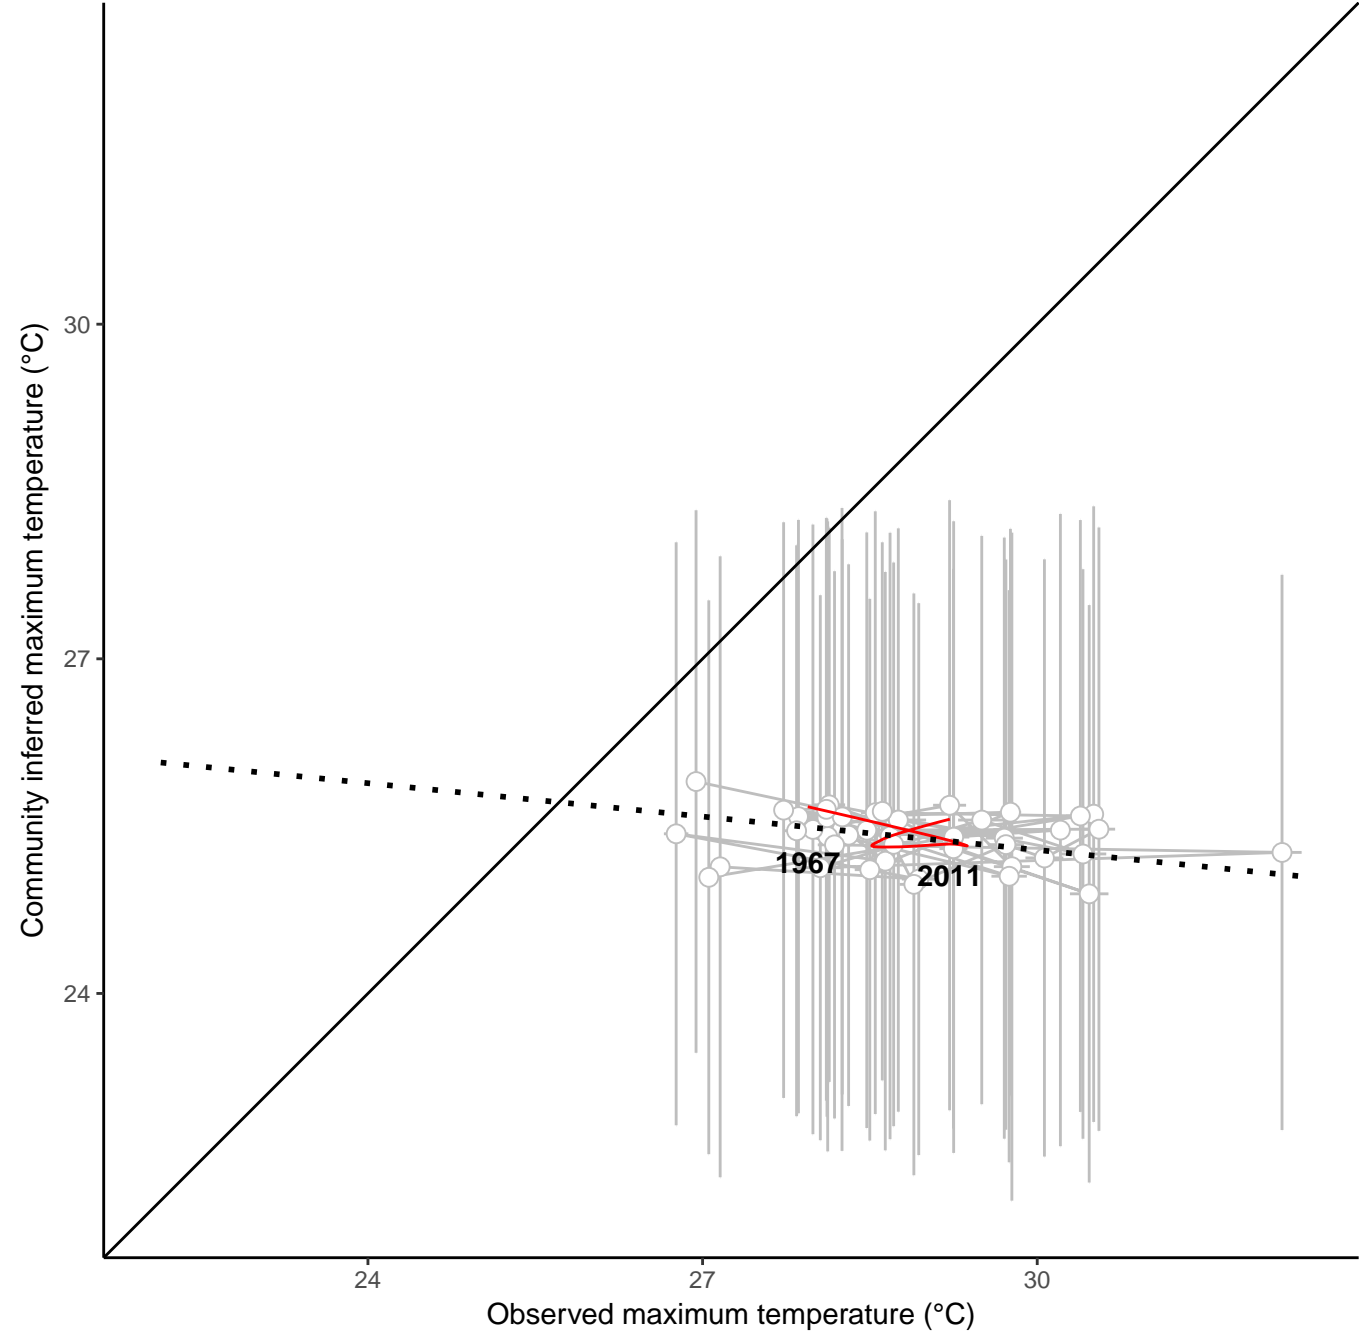

site : 840\_61\_41

absolute deviation = 0.11 | deviation change = 0.2 | maximum state number = 1

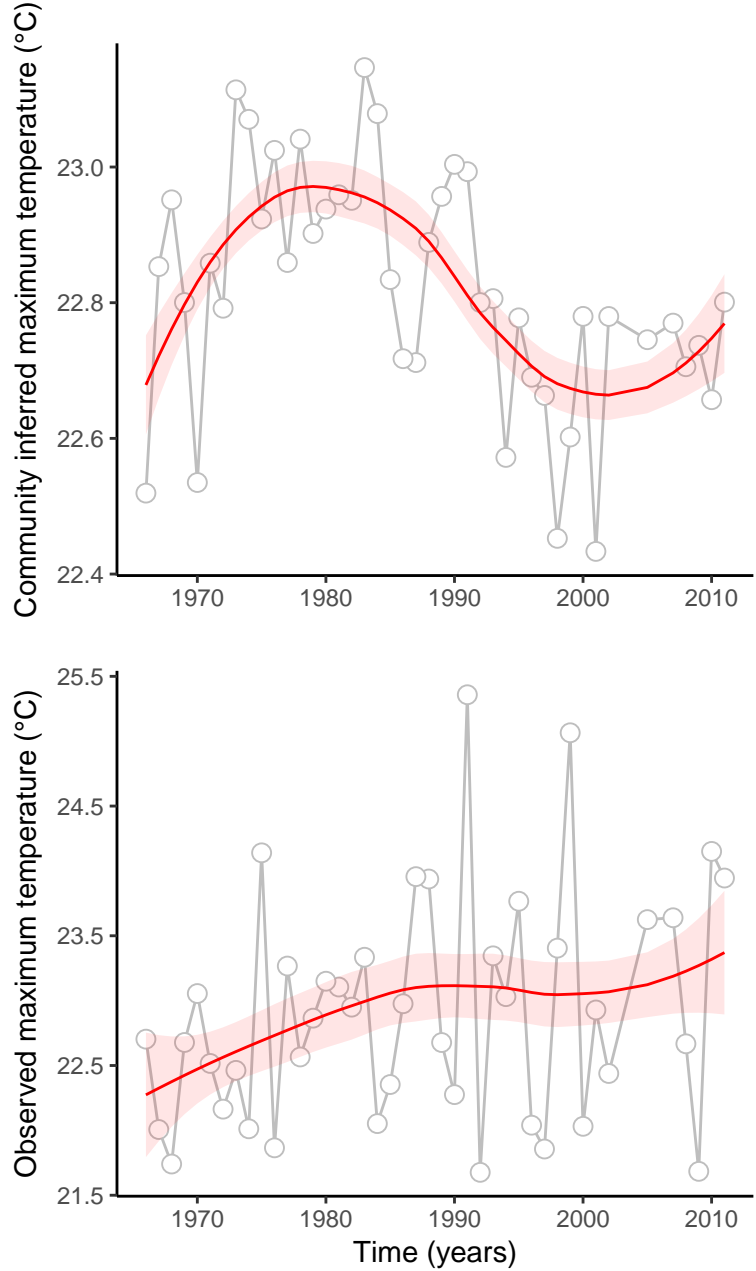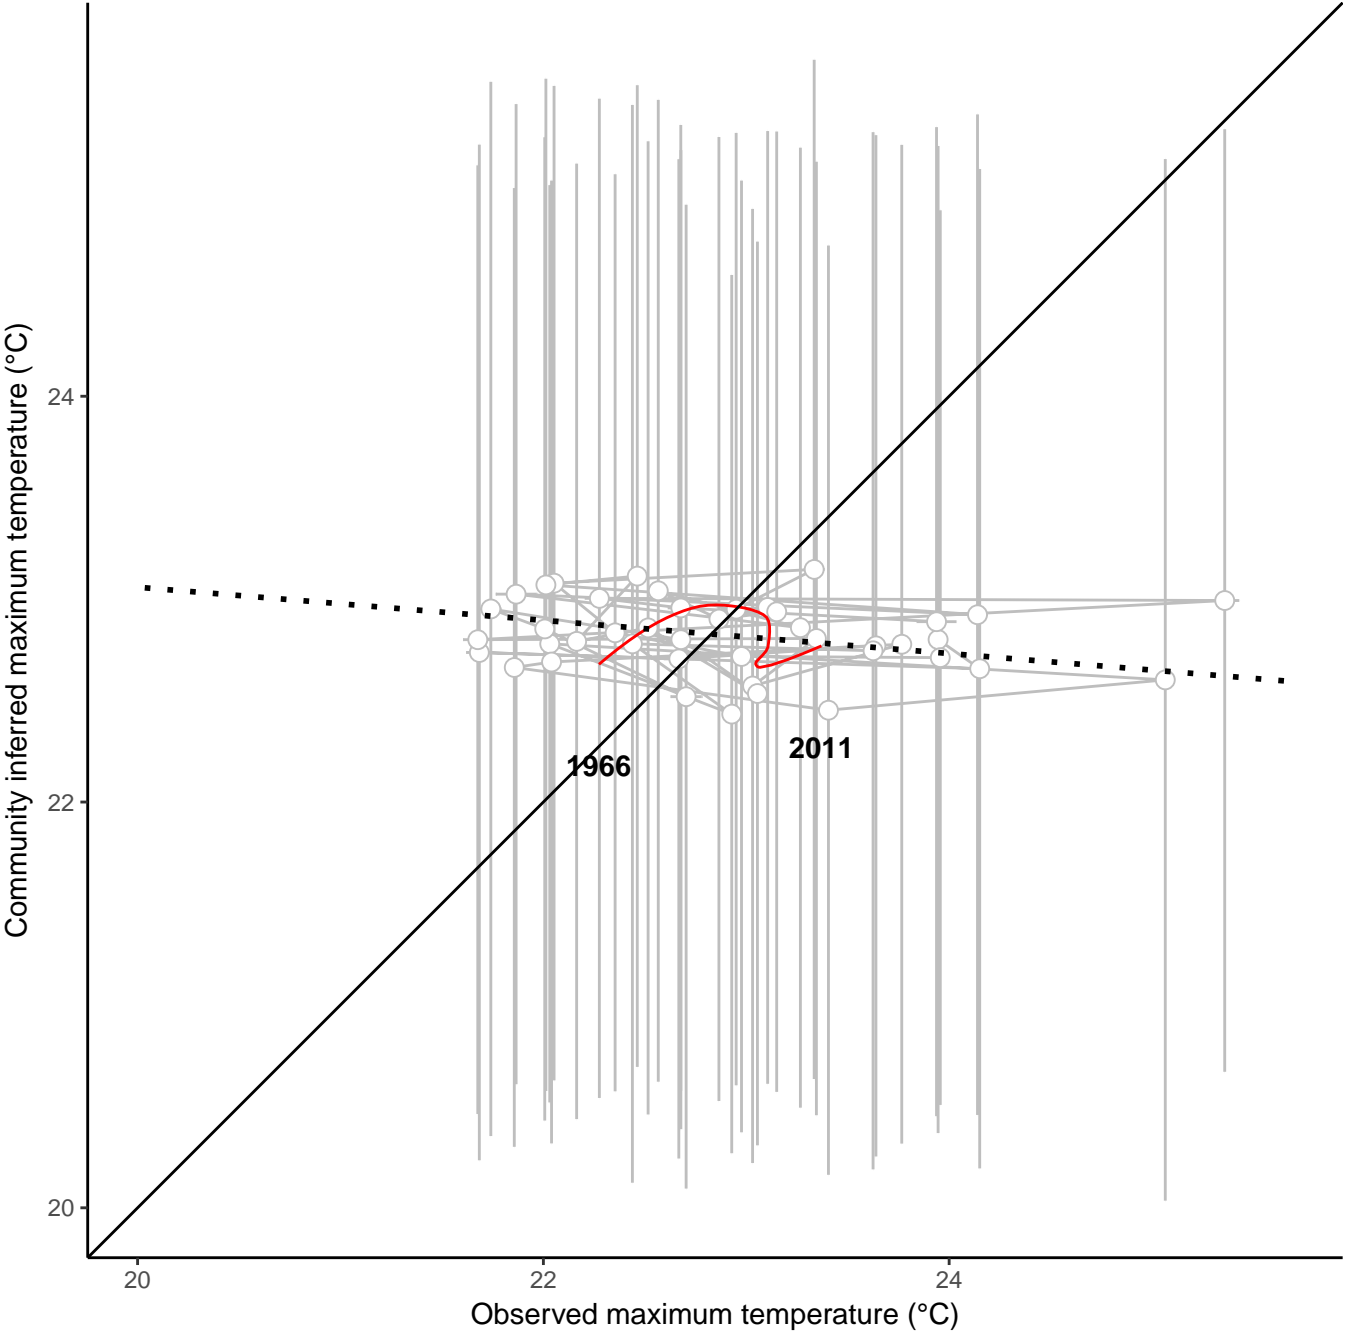

site : 840\_61\_46

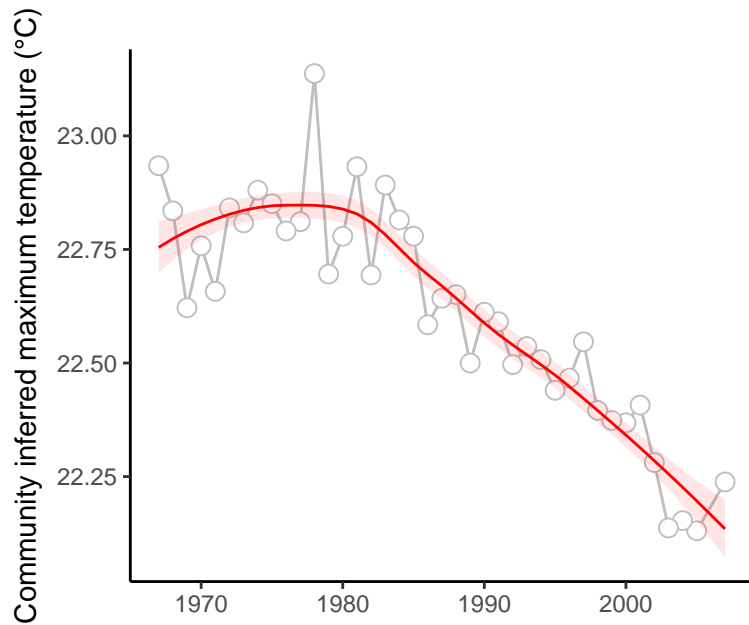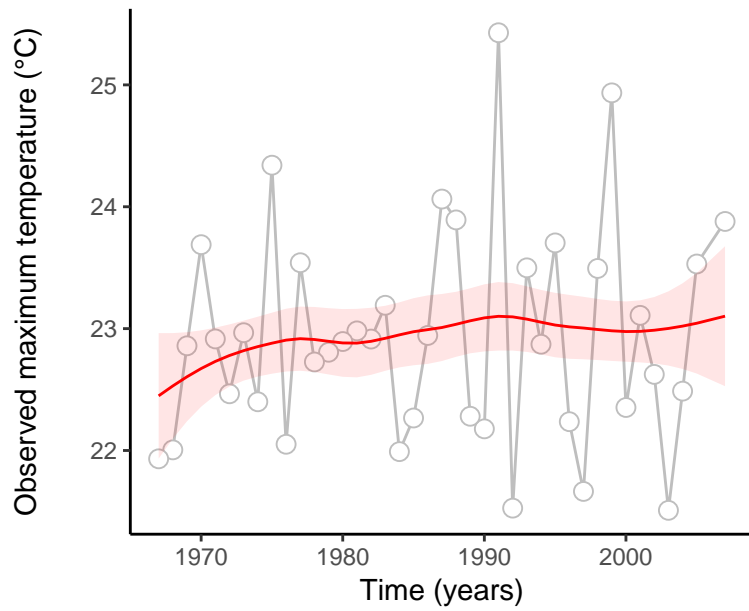

absolute deviation = 0.31 | deviation change = 0.66 | maximum state number = 1

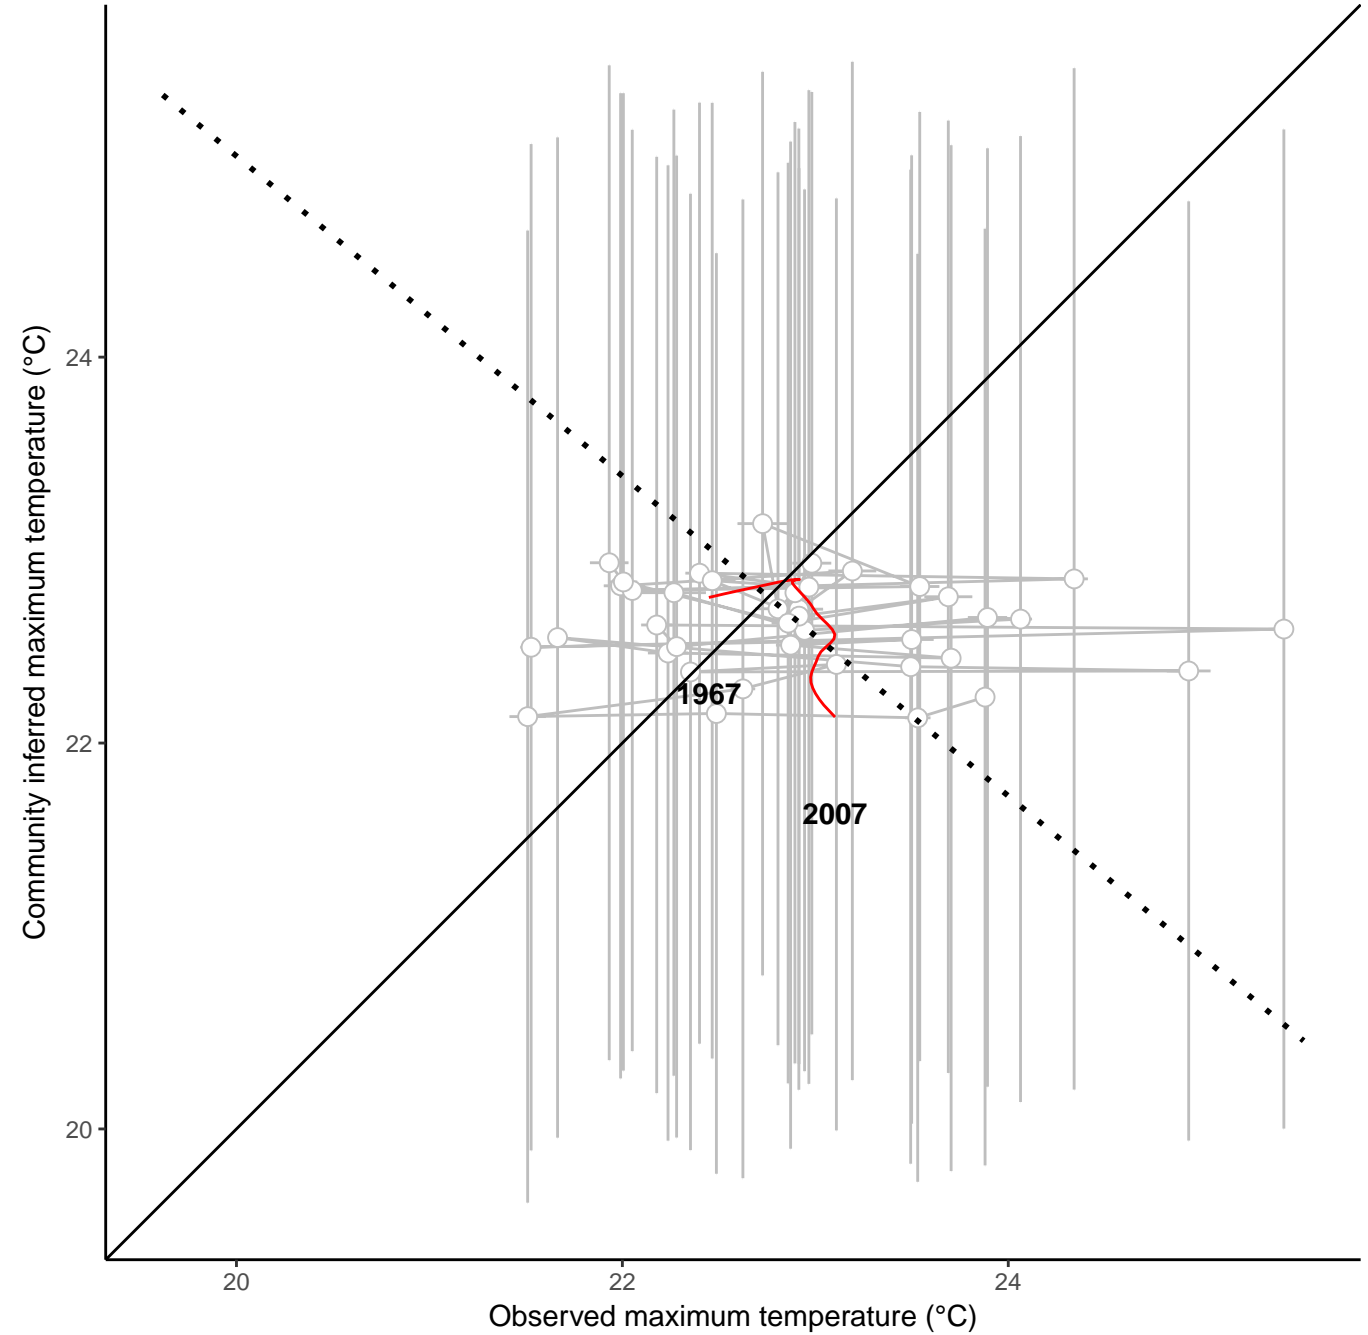

site : 840\_64\_25

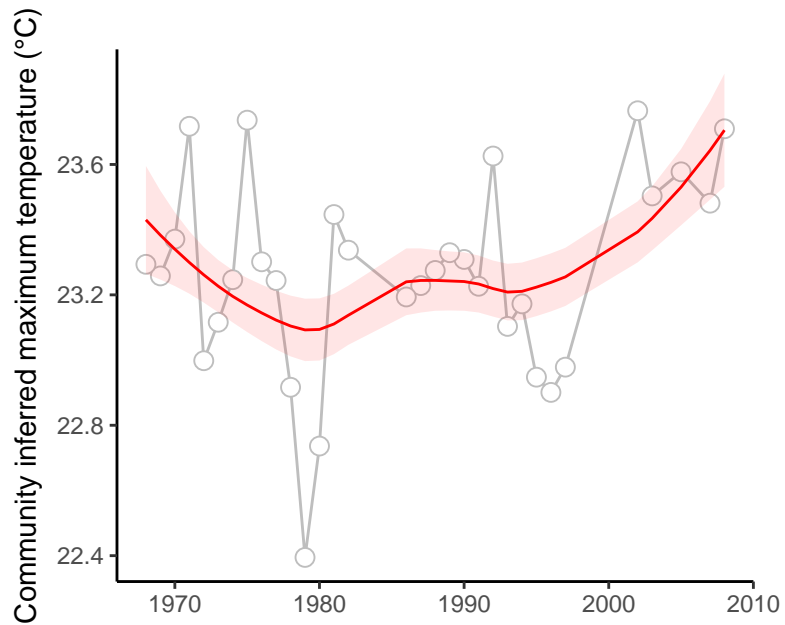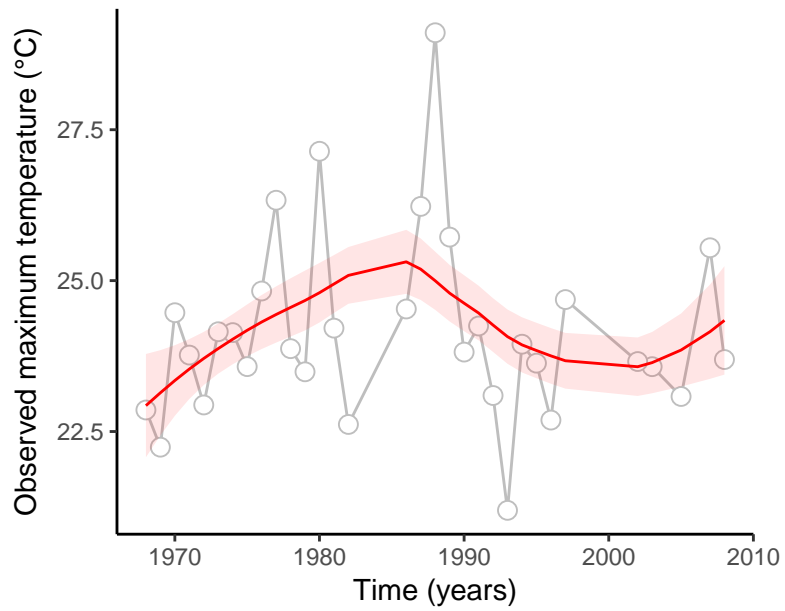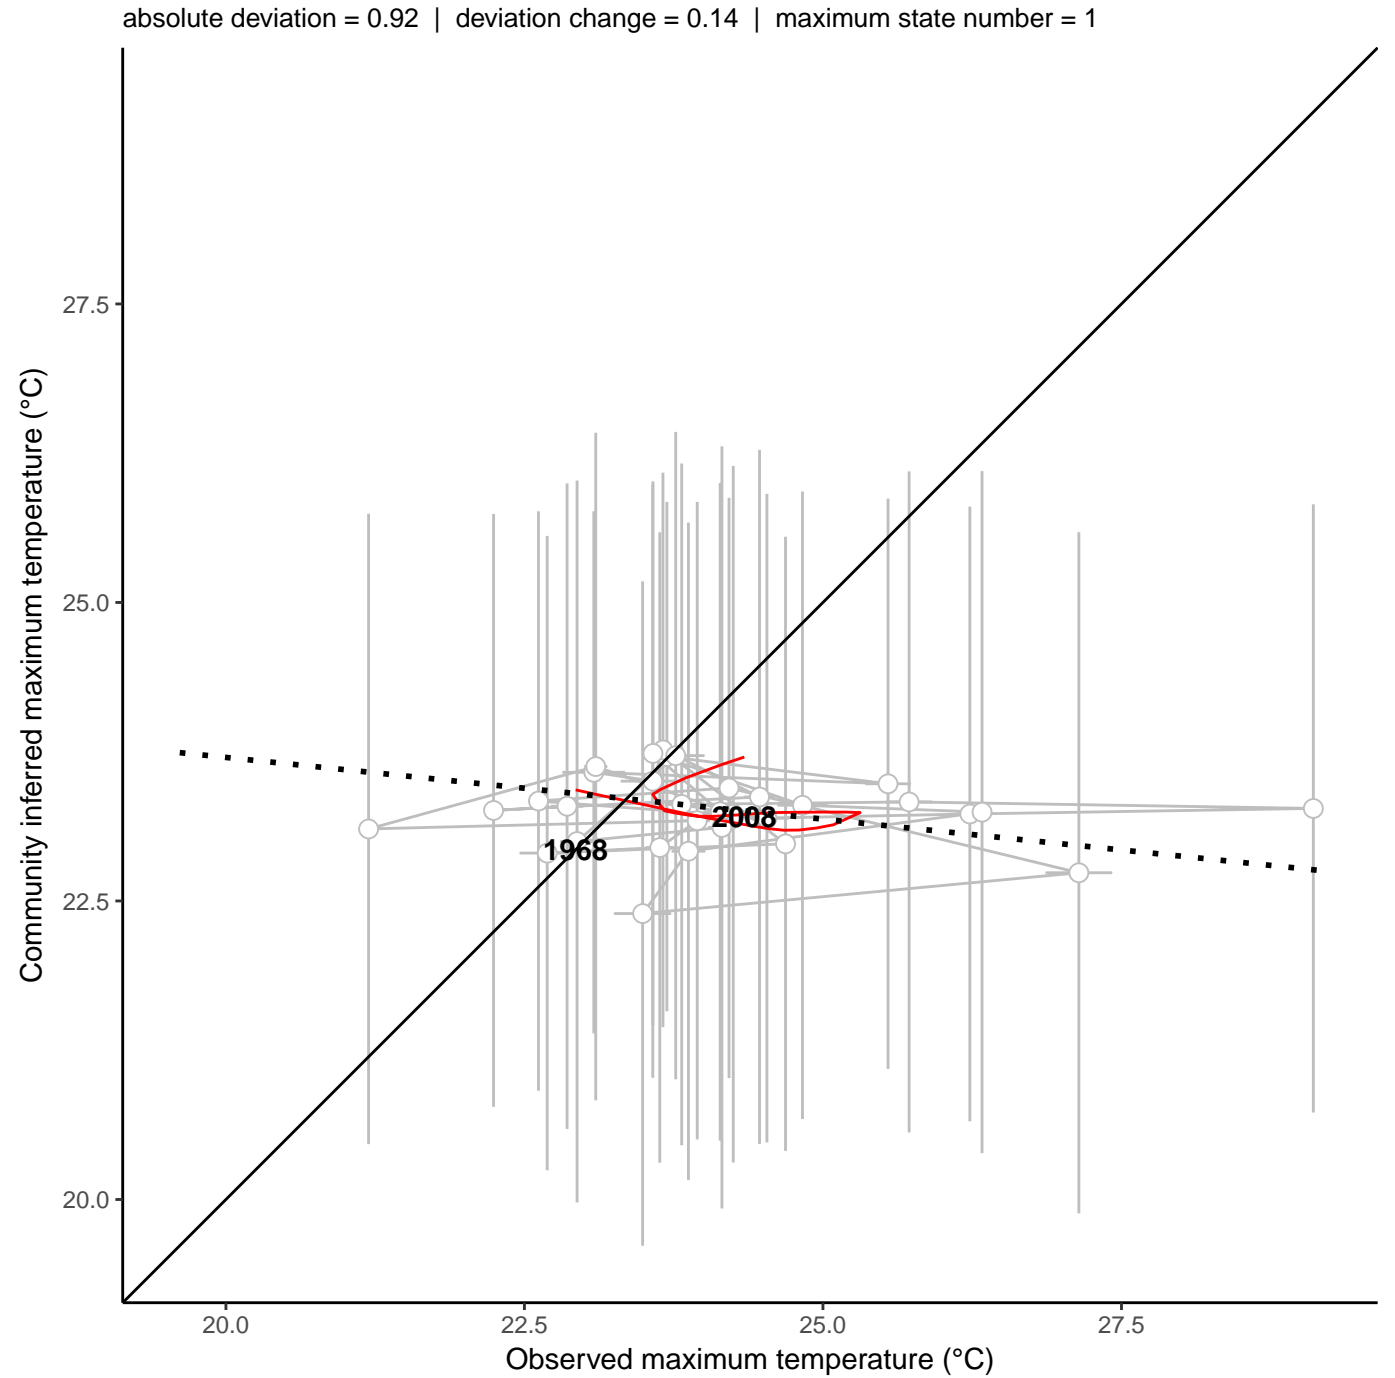



site : 840\_67\_26

absolute deviation = 3.26 | deviation change = 0.28 | maximum state number = 1

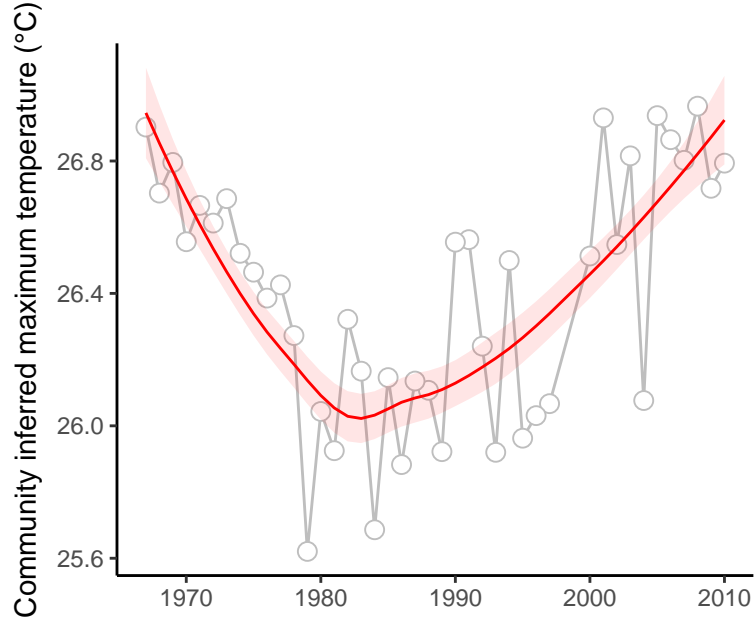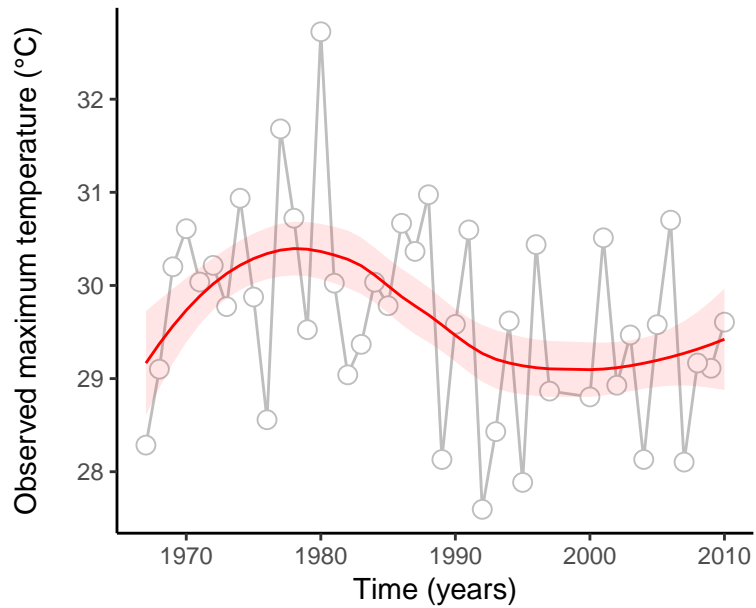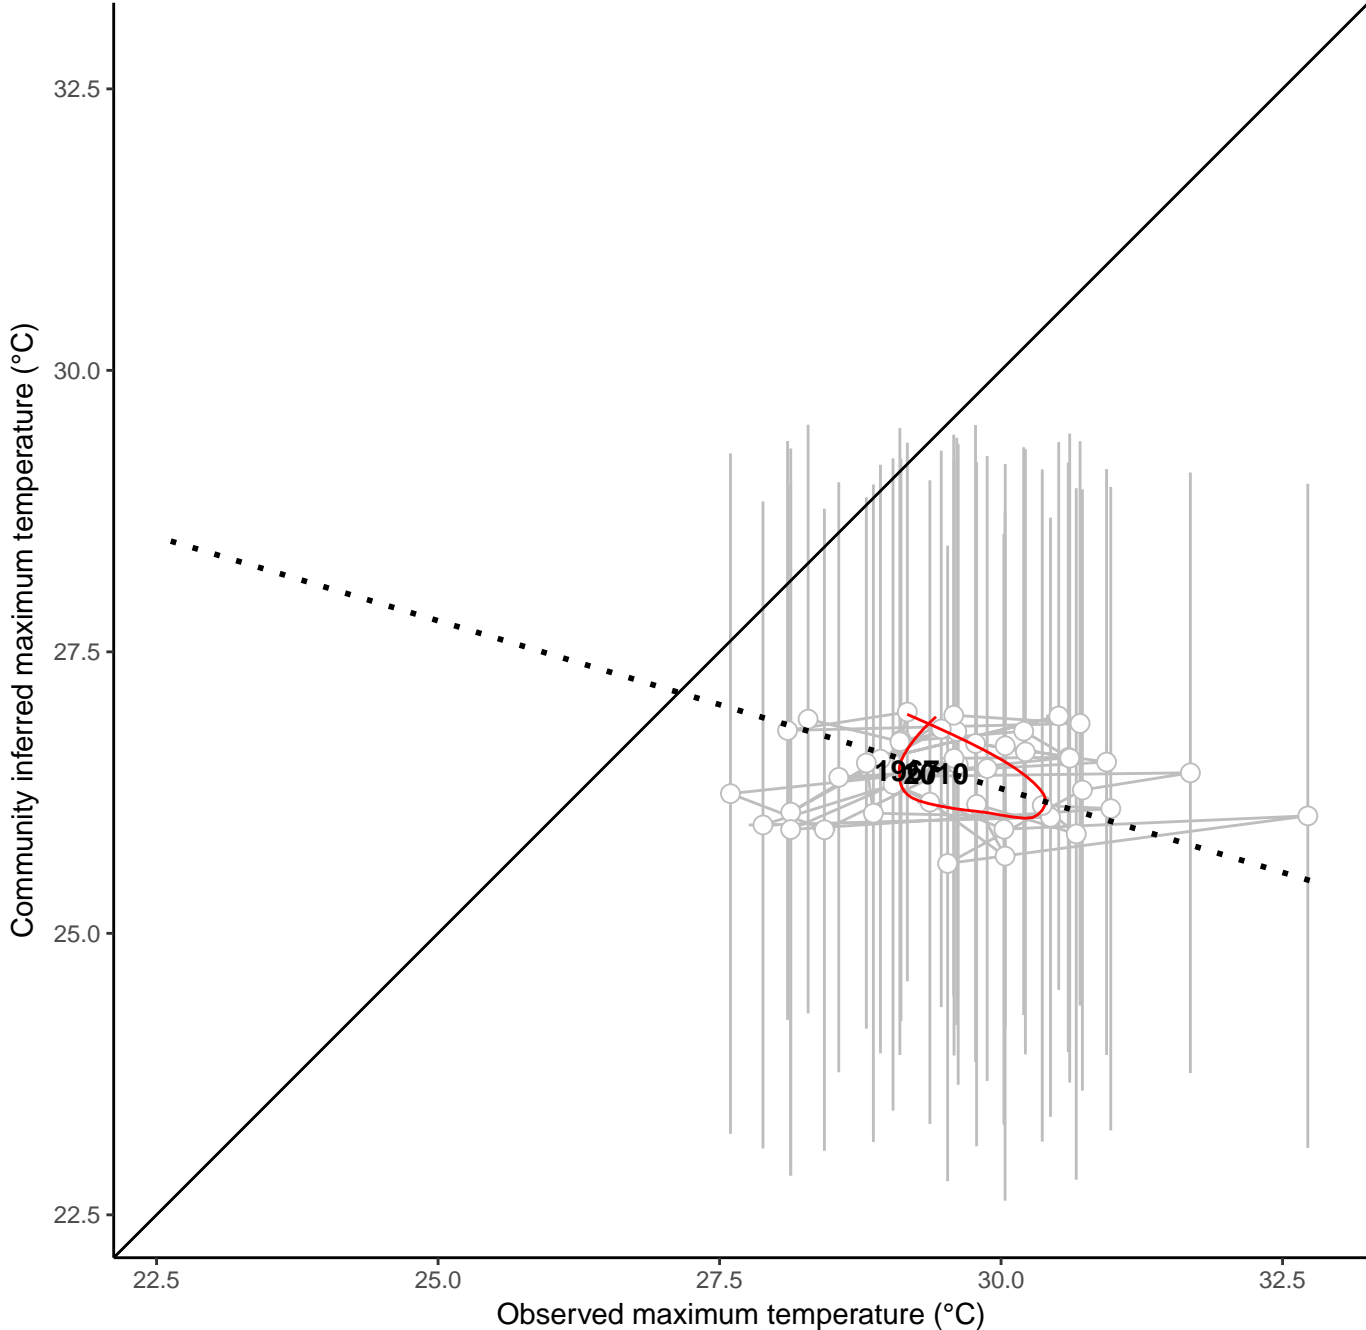

site : 840\_72\_91

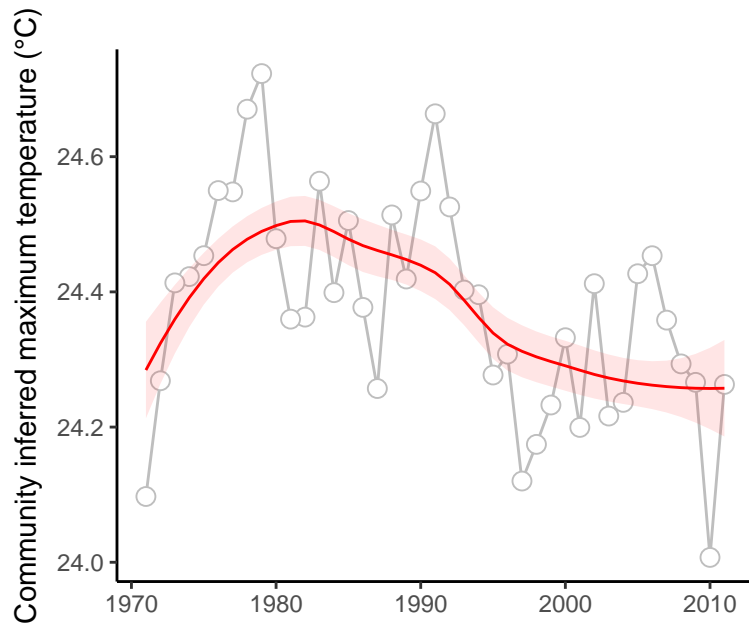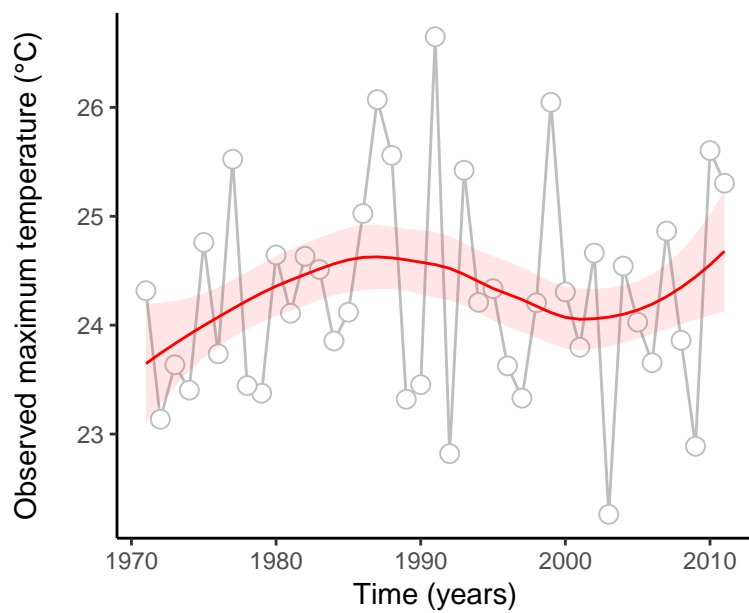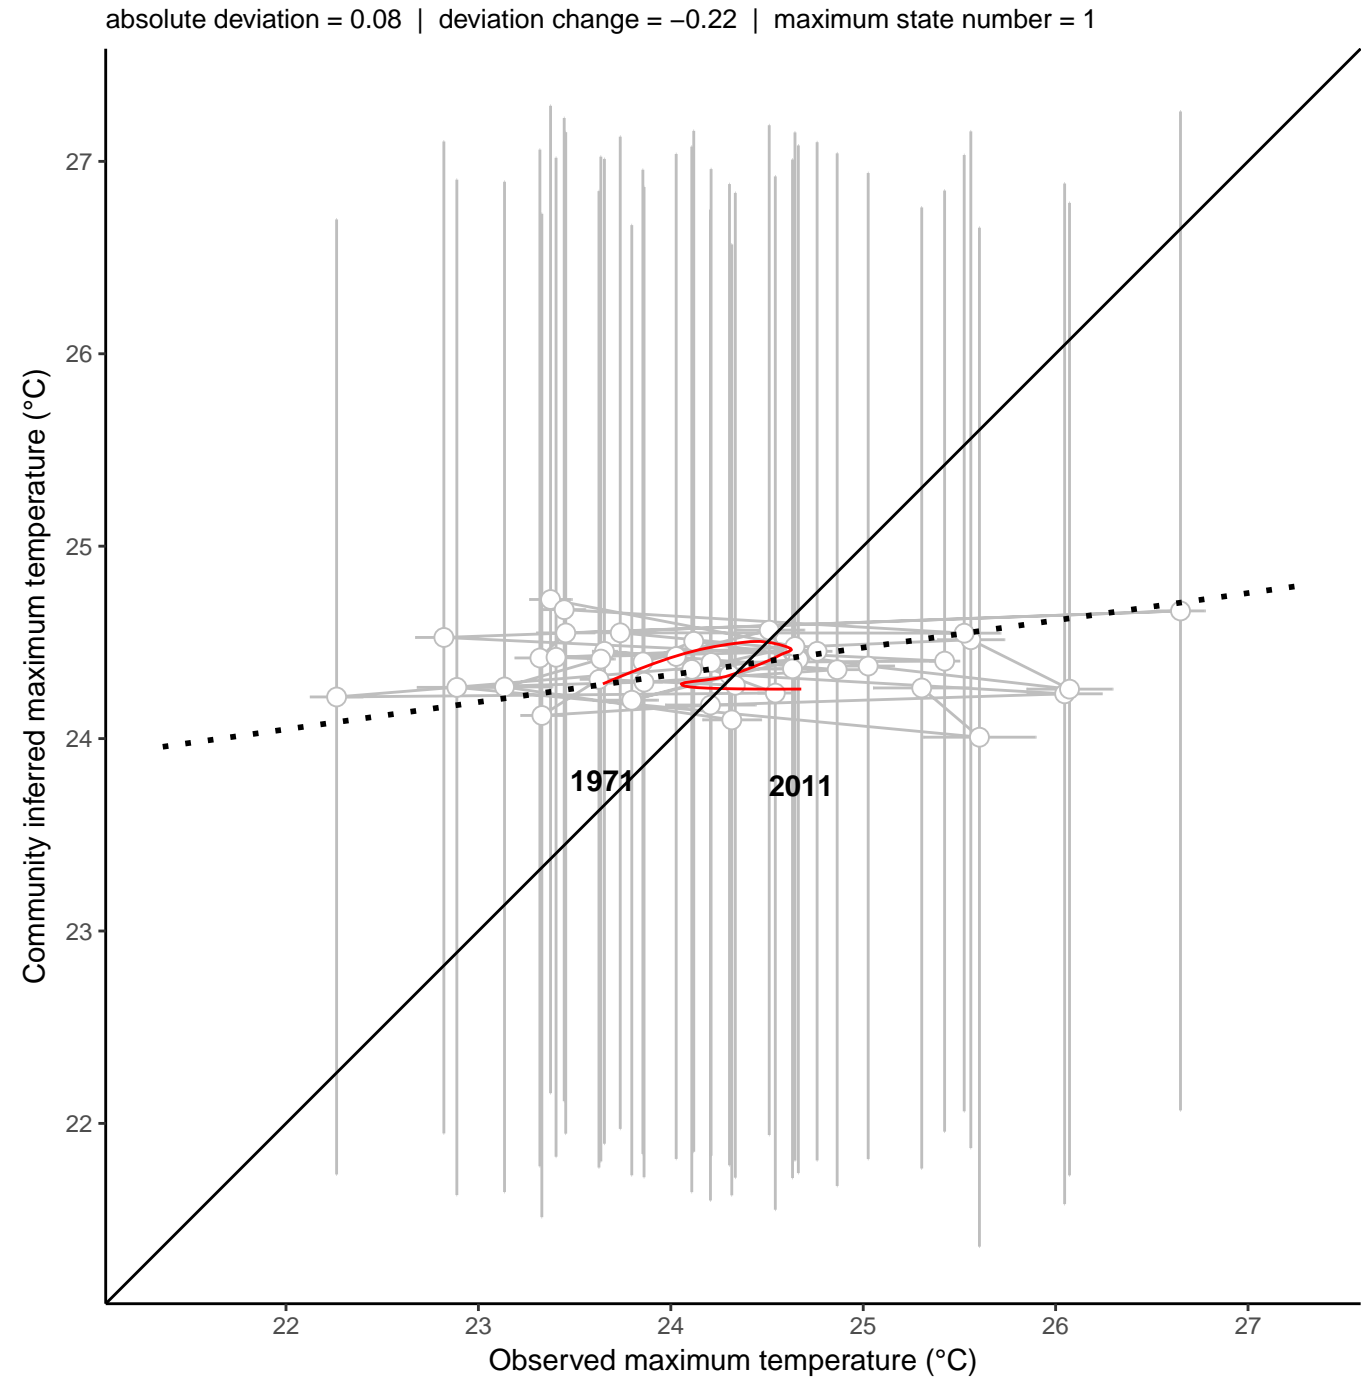

site : 840\_82\_10

absolute deviation = 3.77 | deviation change = 0.6 | maximum state number = 1

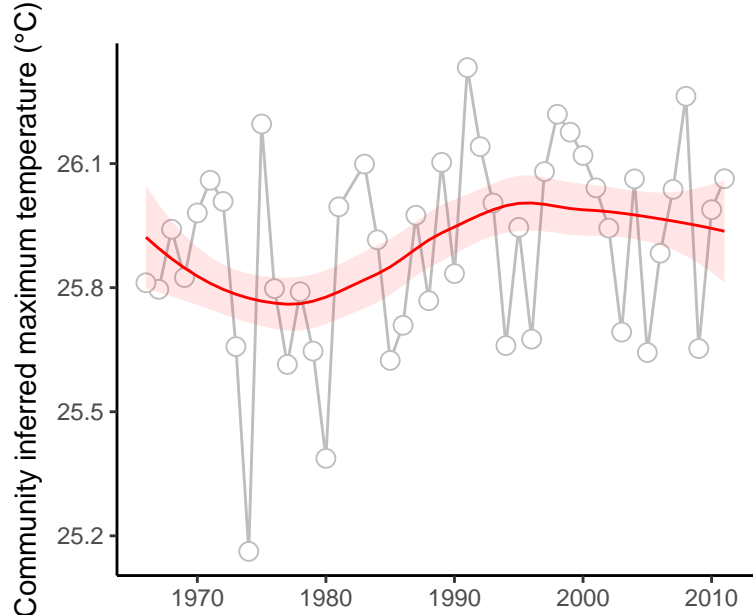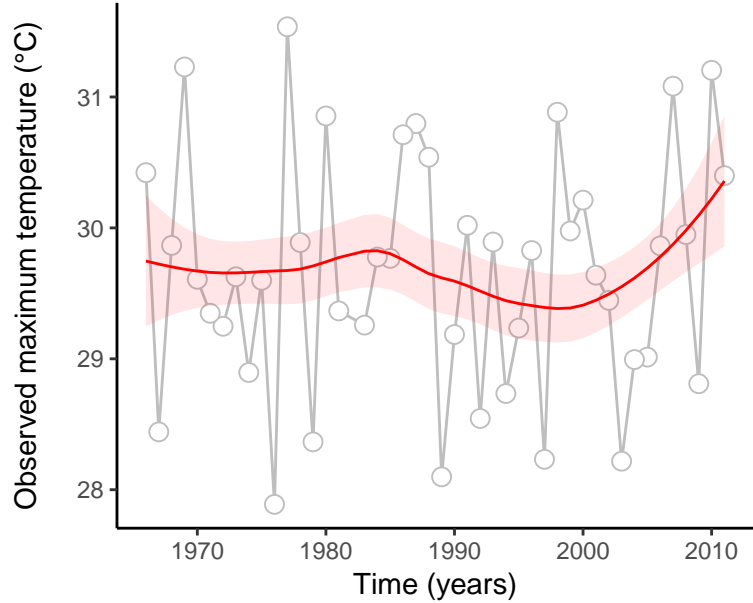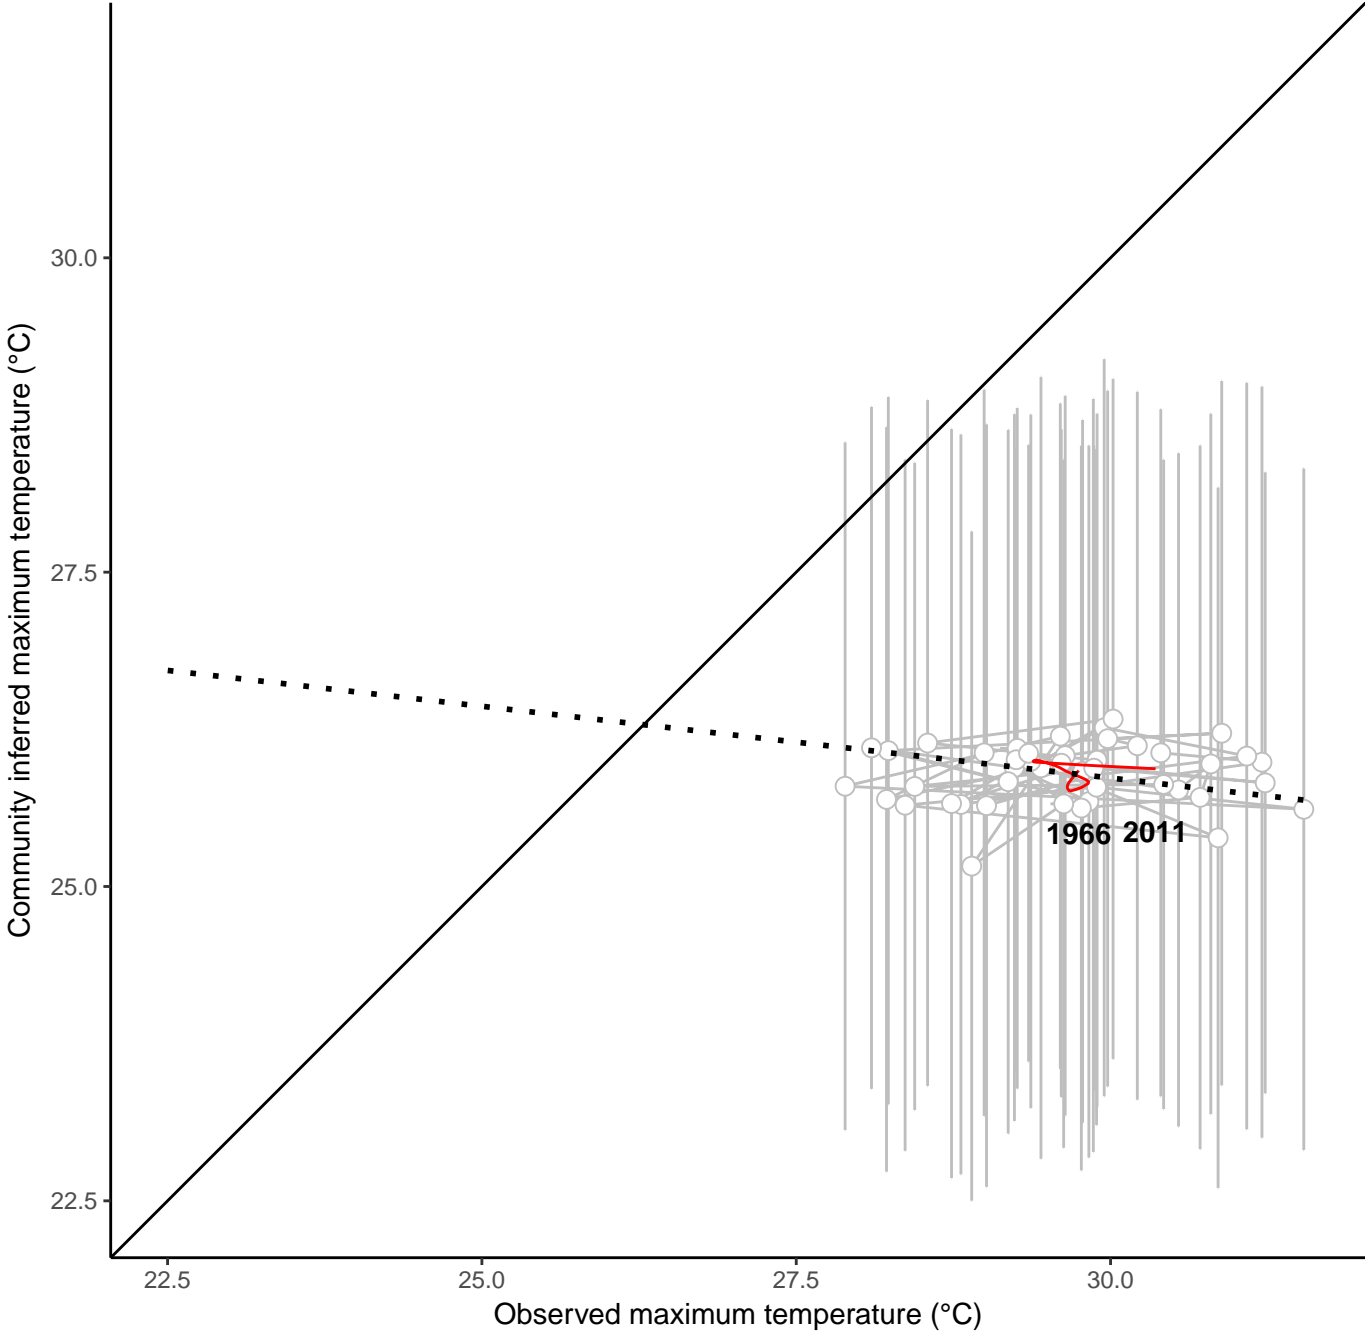

site : 840\_90\_1

absolute deviation = 0.41 | deviation change = 0.55 | maximum state number = 1

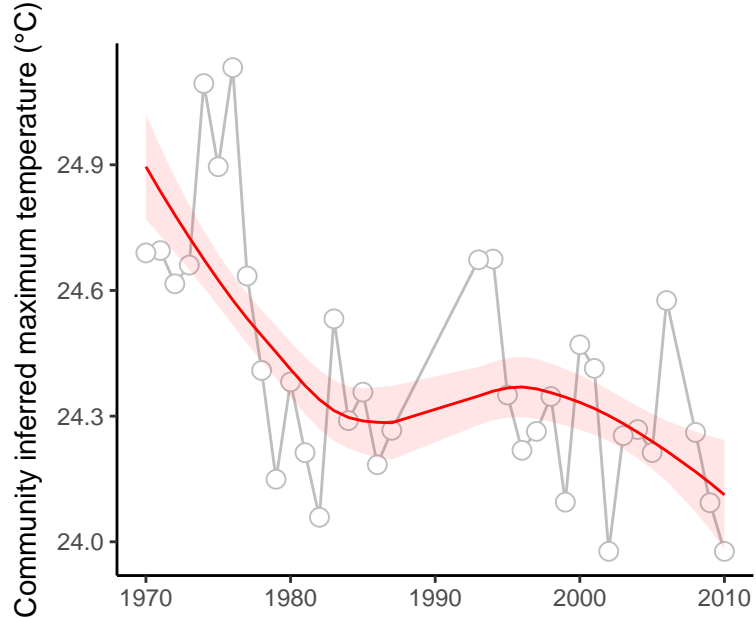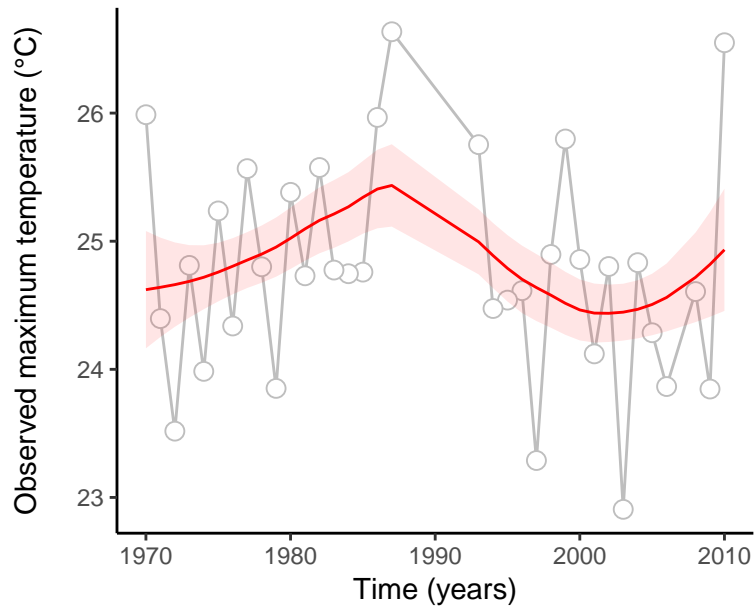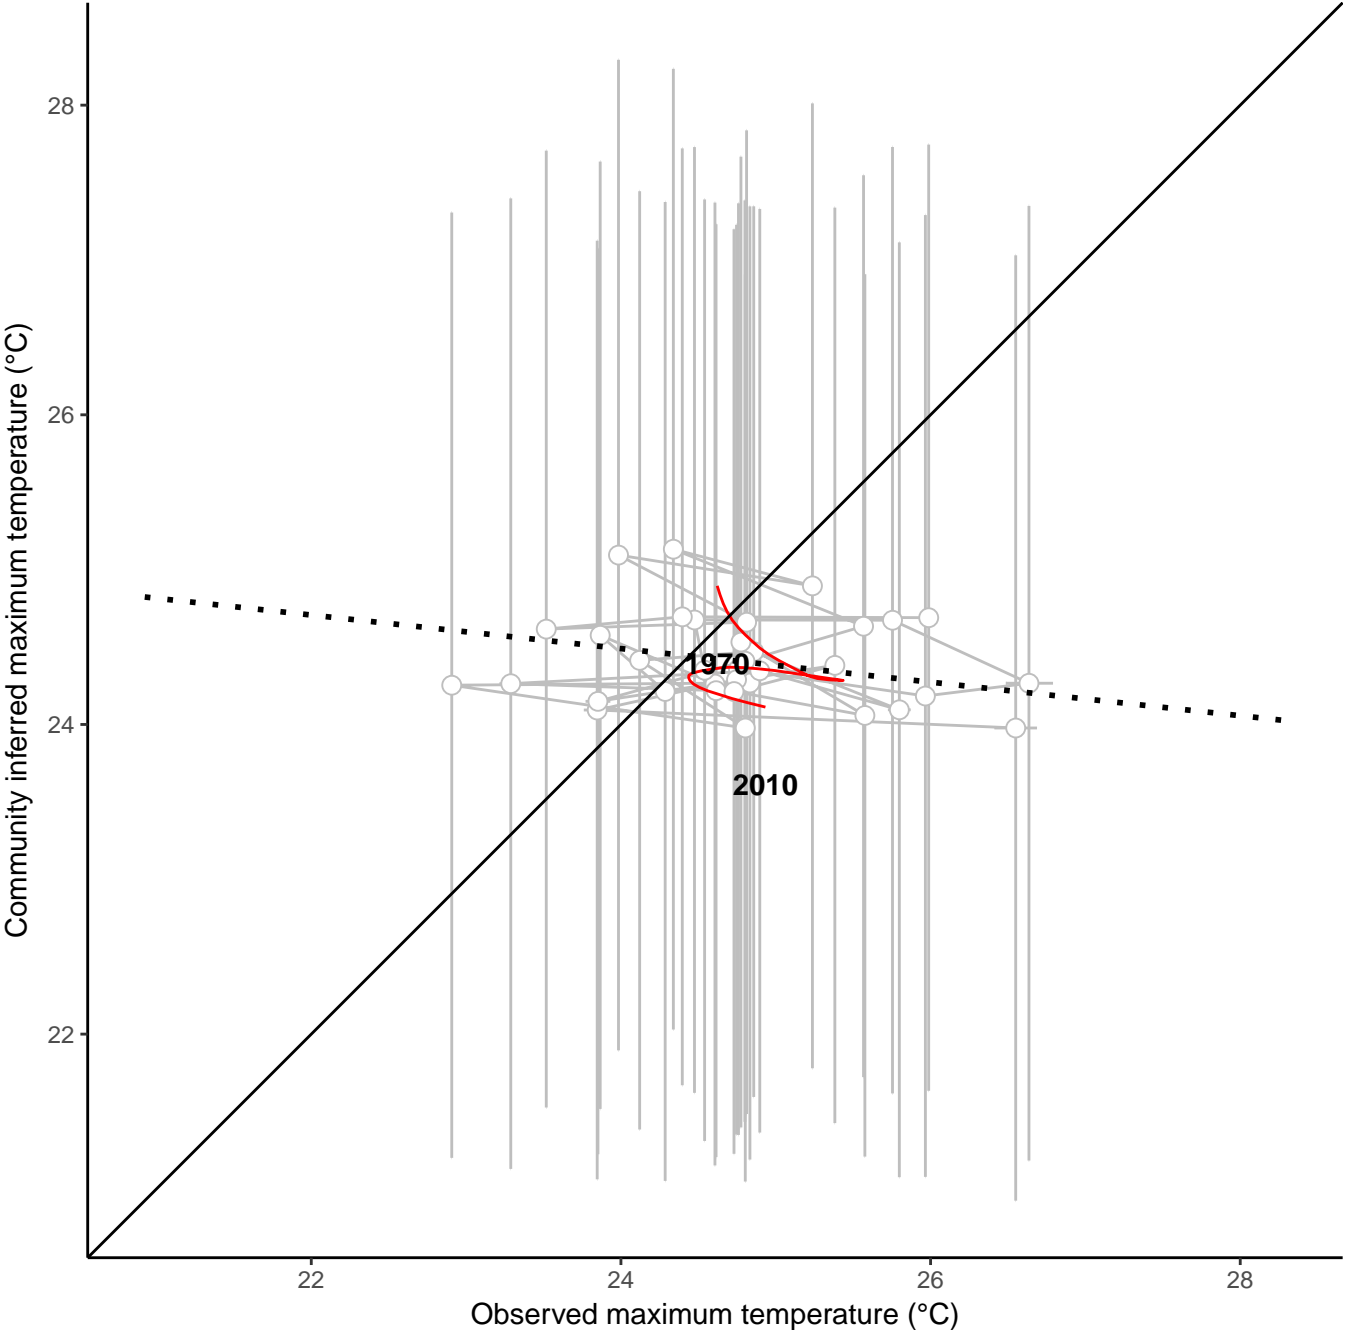

site : 840\_91\_19

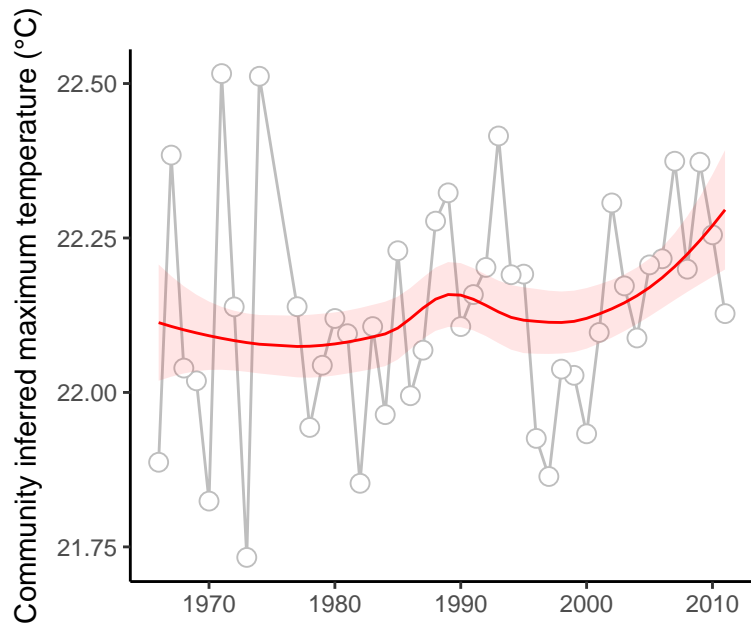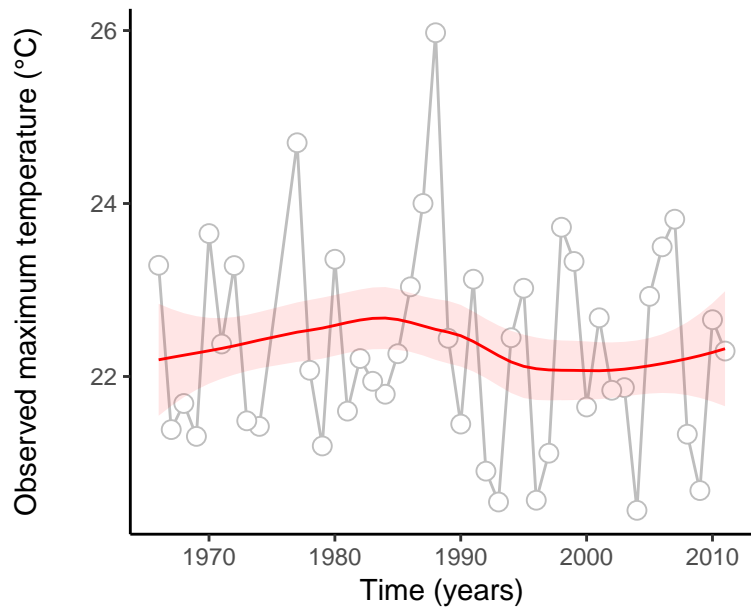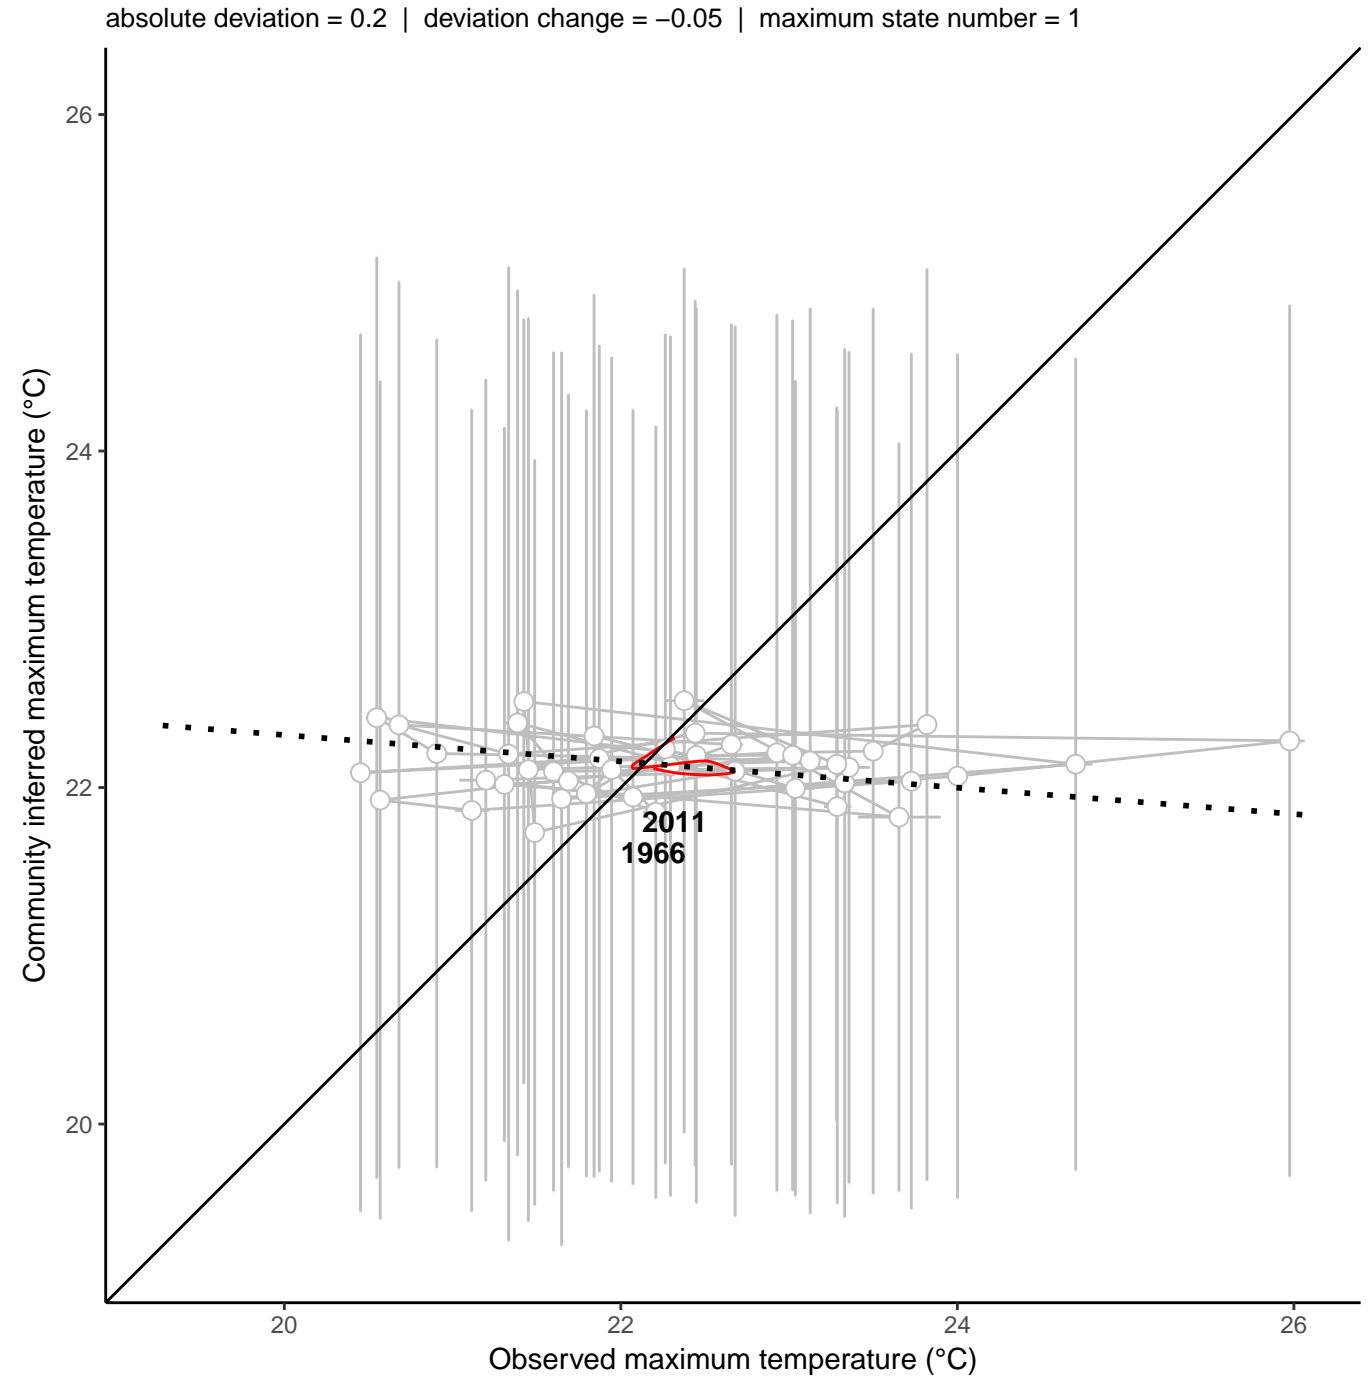

site : 840\_91\_26

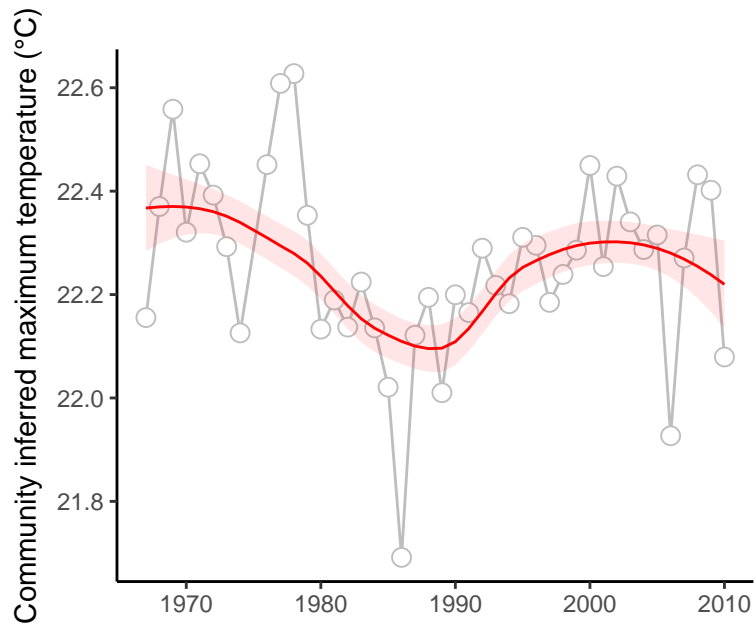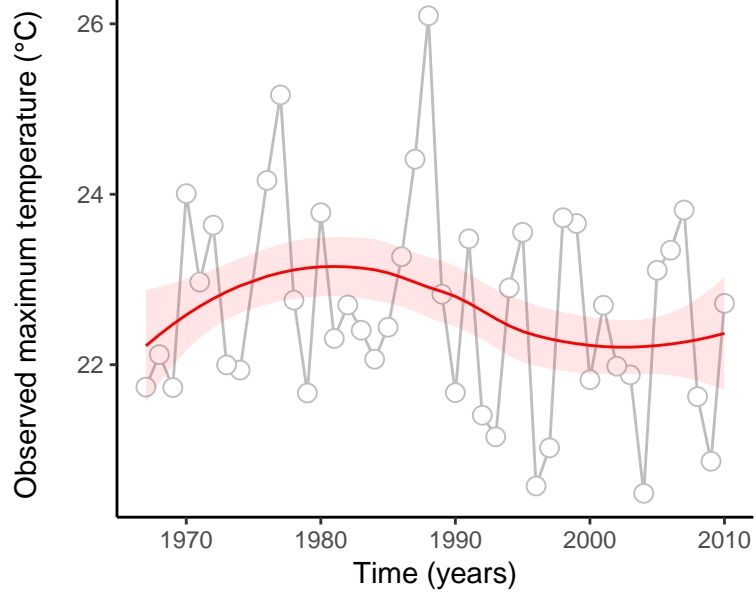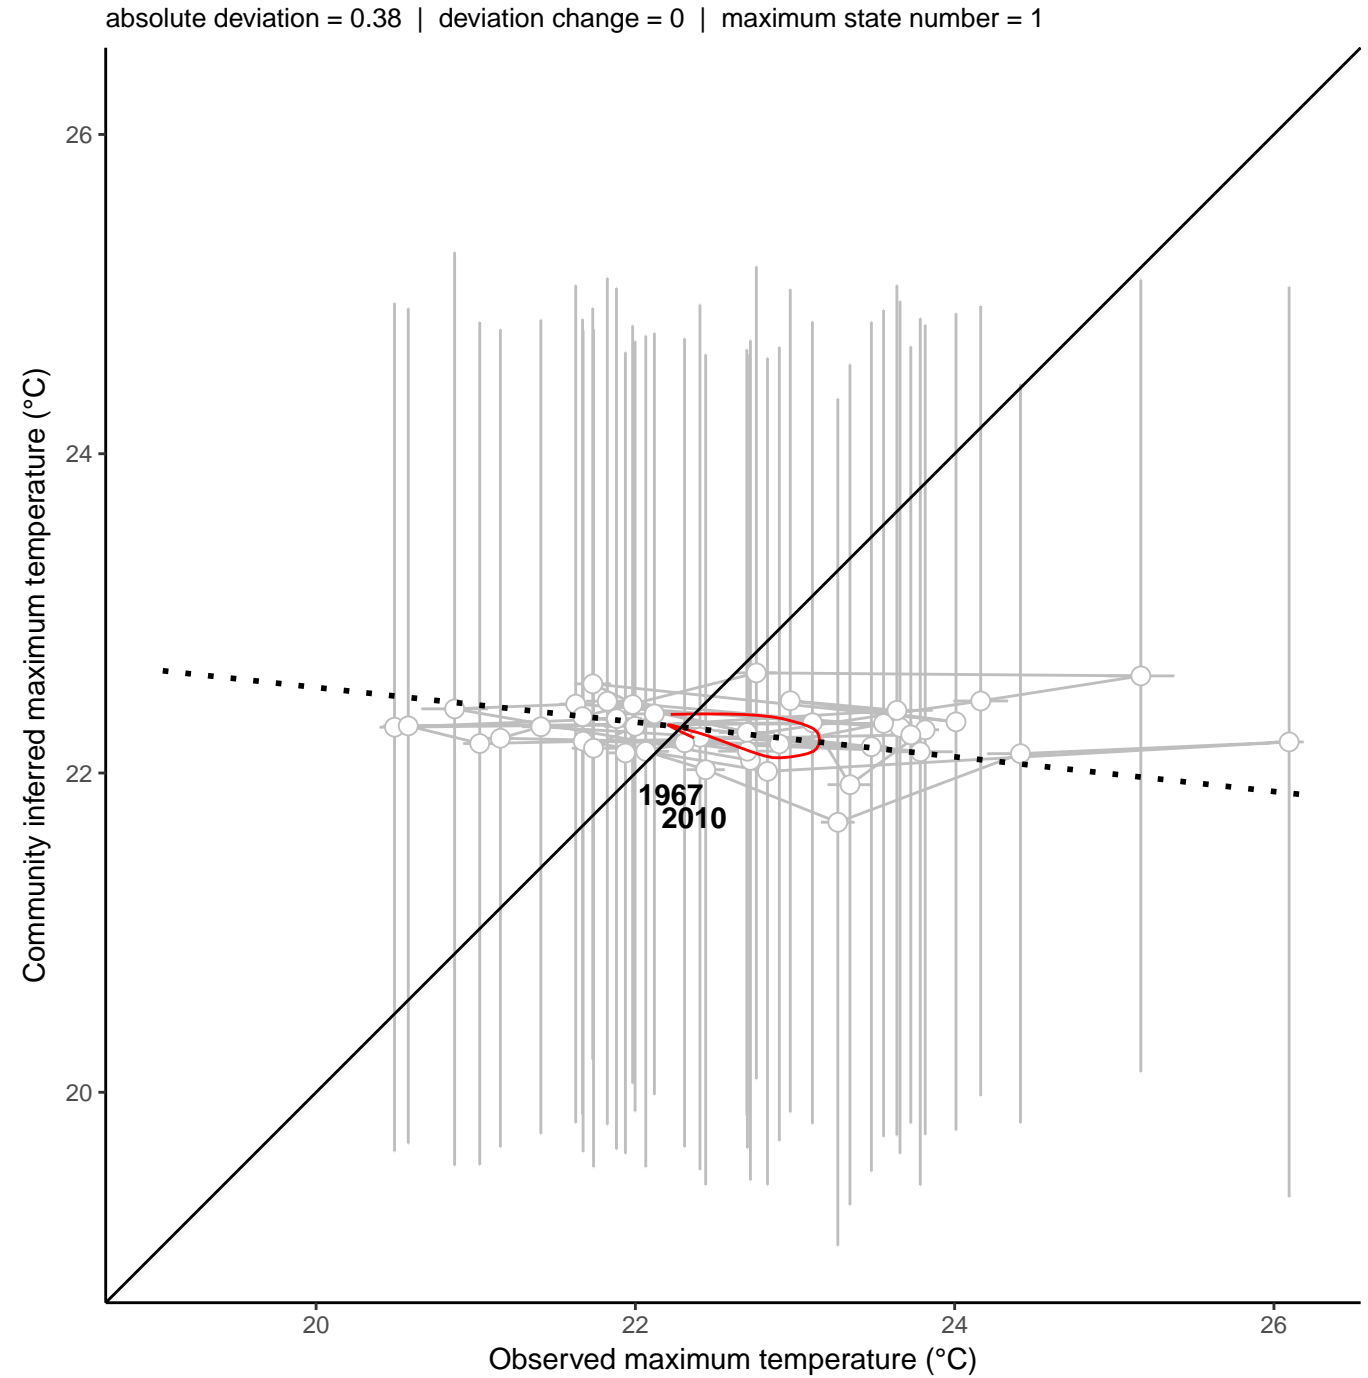

site : 840\_2\_13

absolute deviation = 3.77 | deviation change = 1.4 | maximum state number = 1

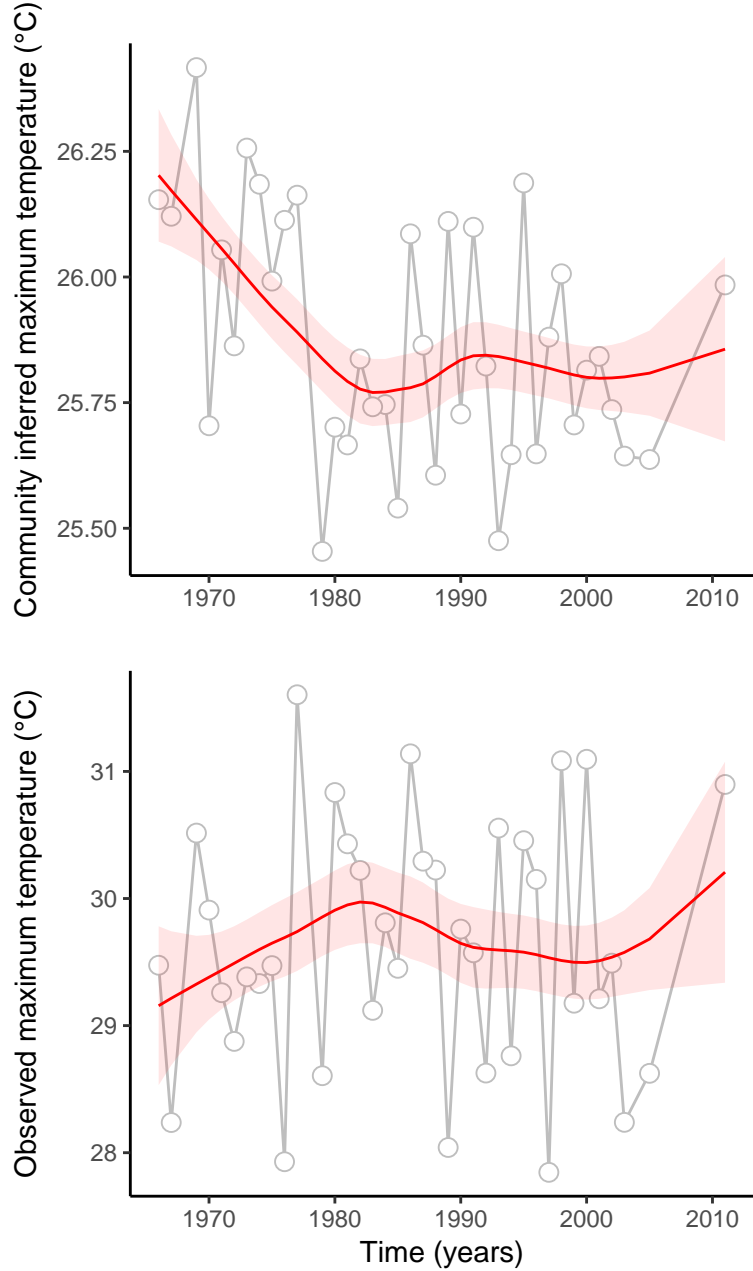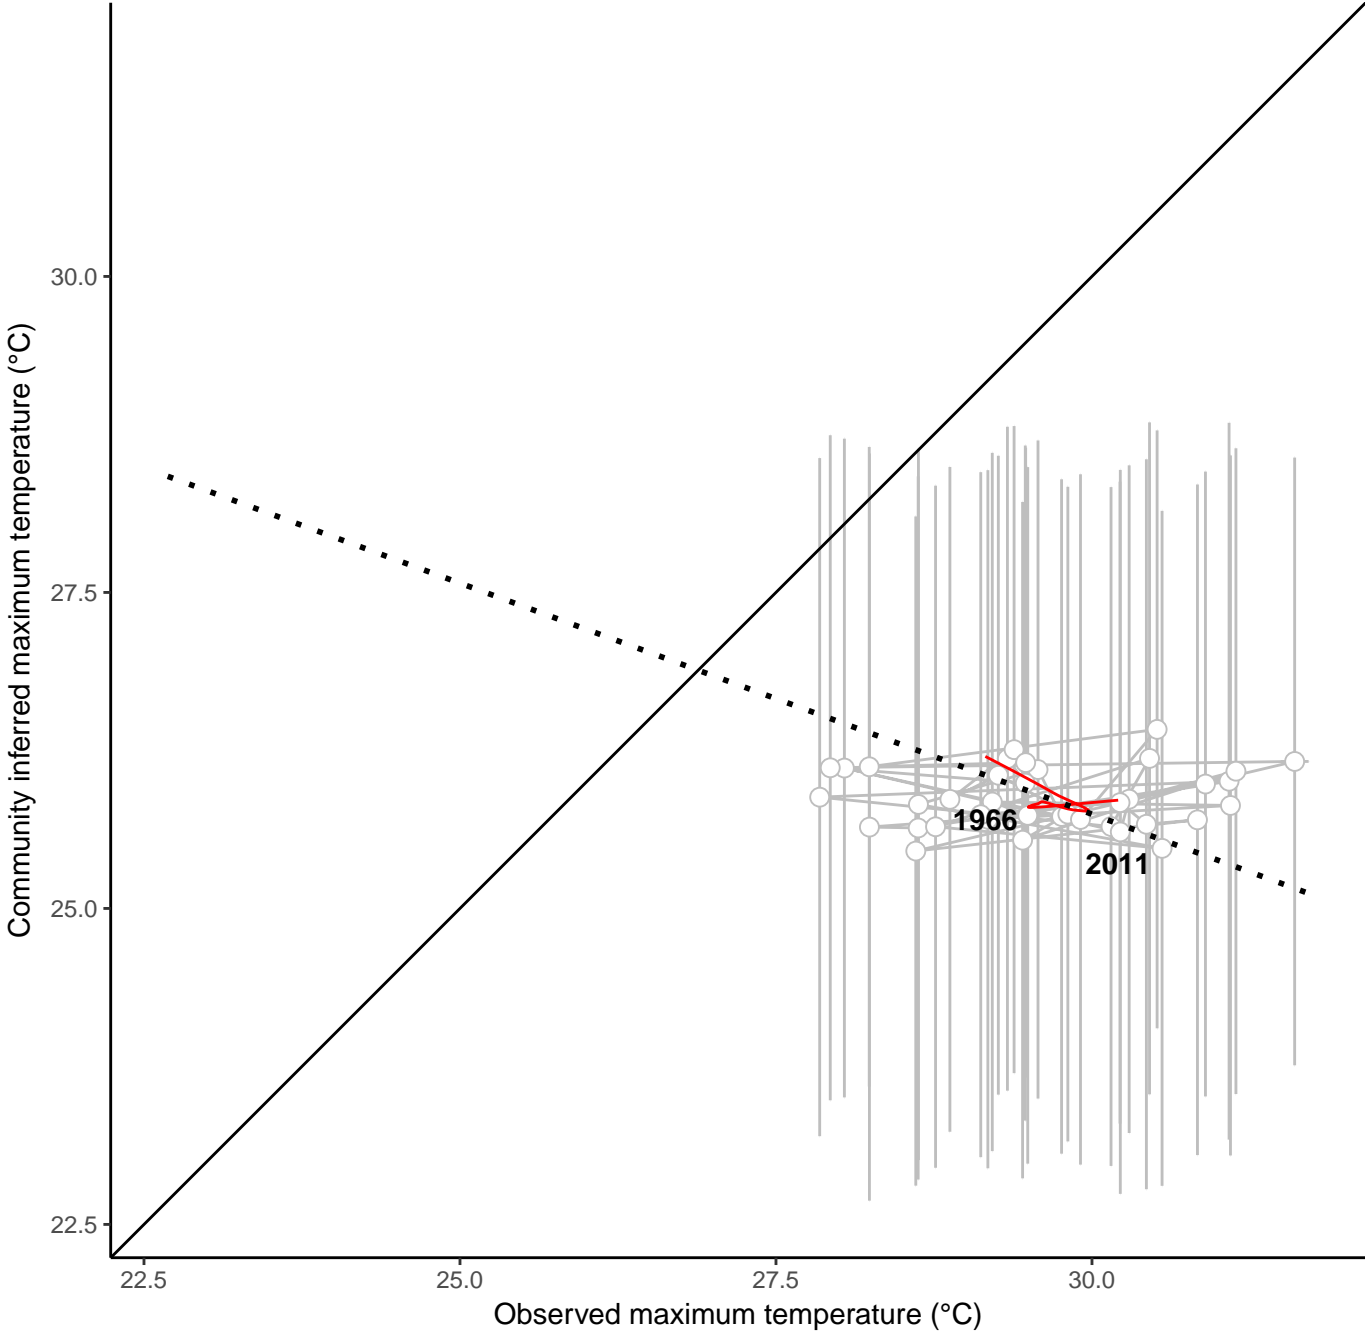

site : 840\_2\_21

absolute deviation = 4.51 | deviation change = 0.25 | maximum state number = 1

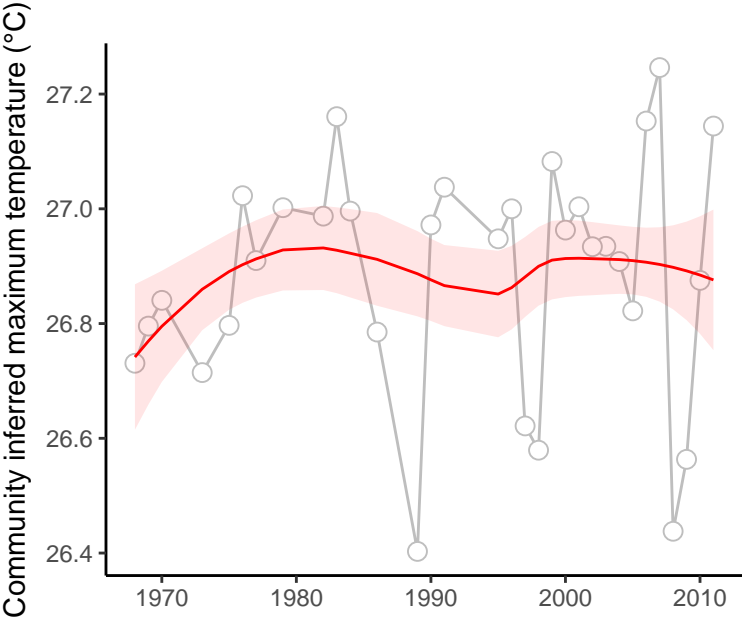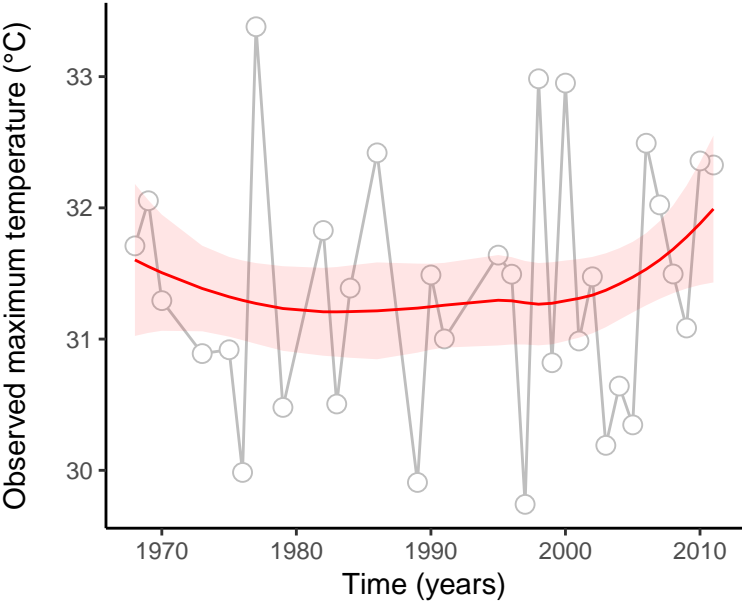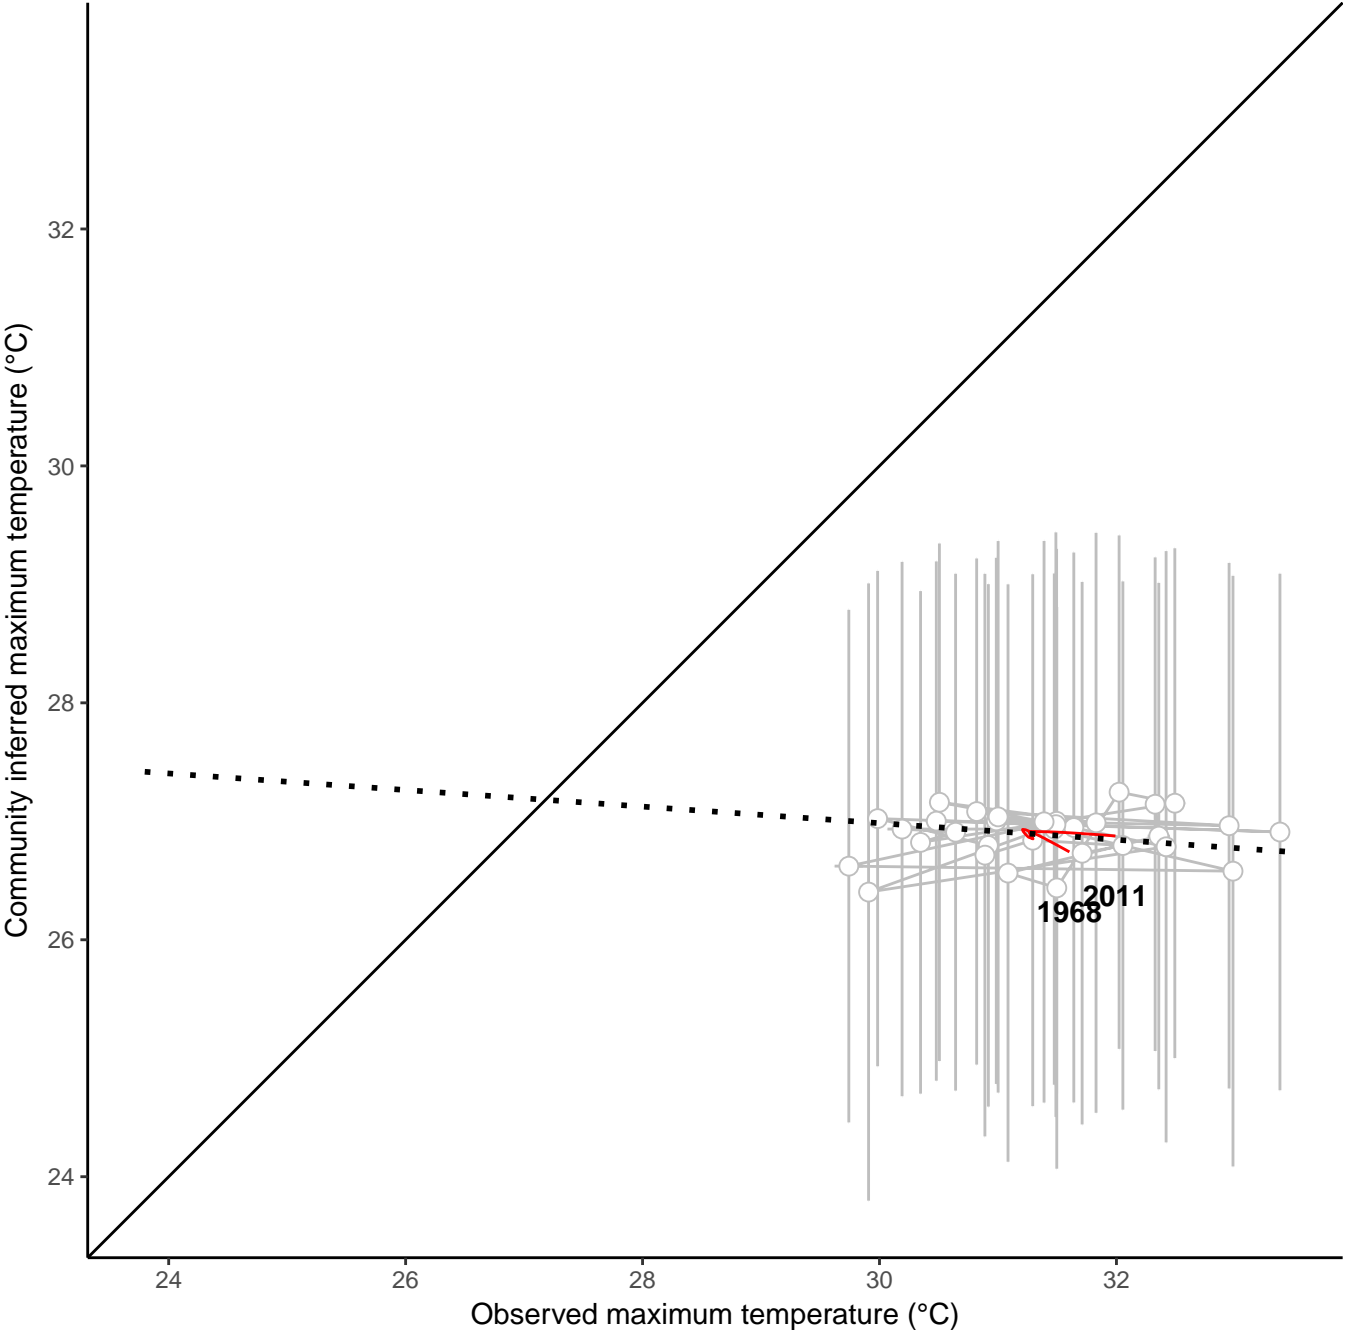



site : 840\_34\_10

absolute deviation = 2.85 | deviation change = 1.2 | maximum state number = 2

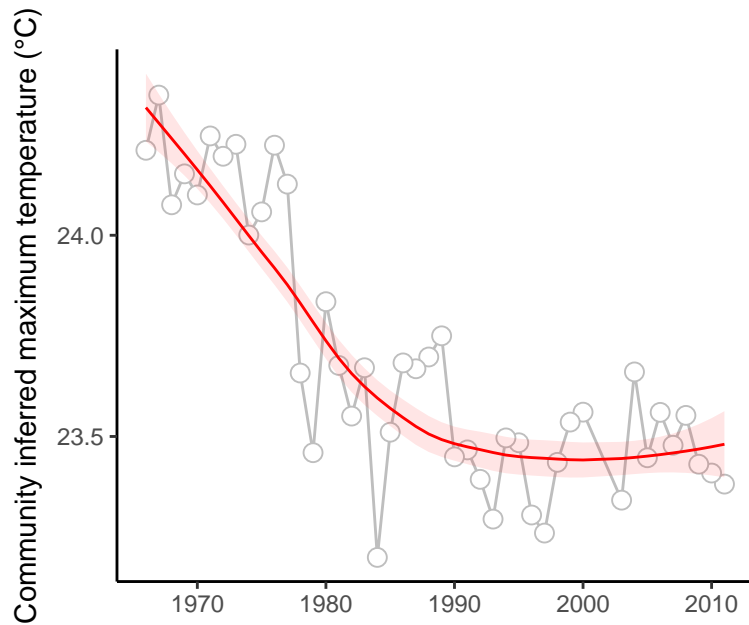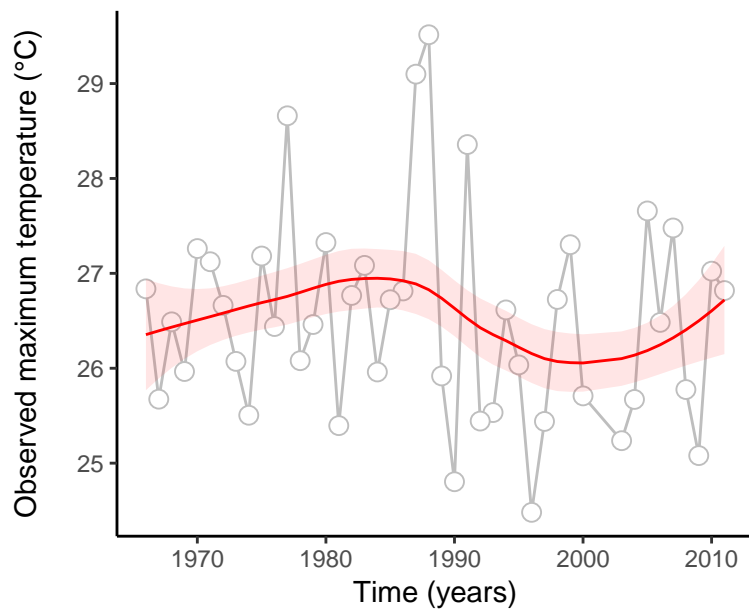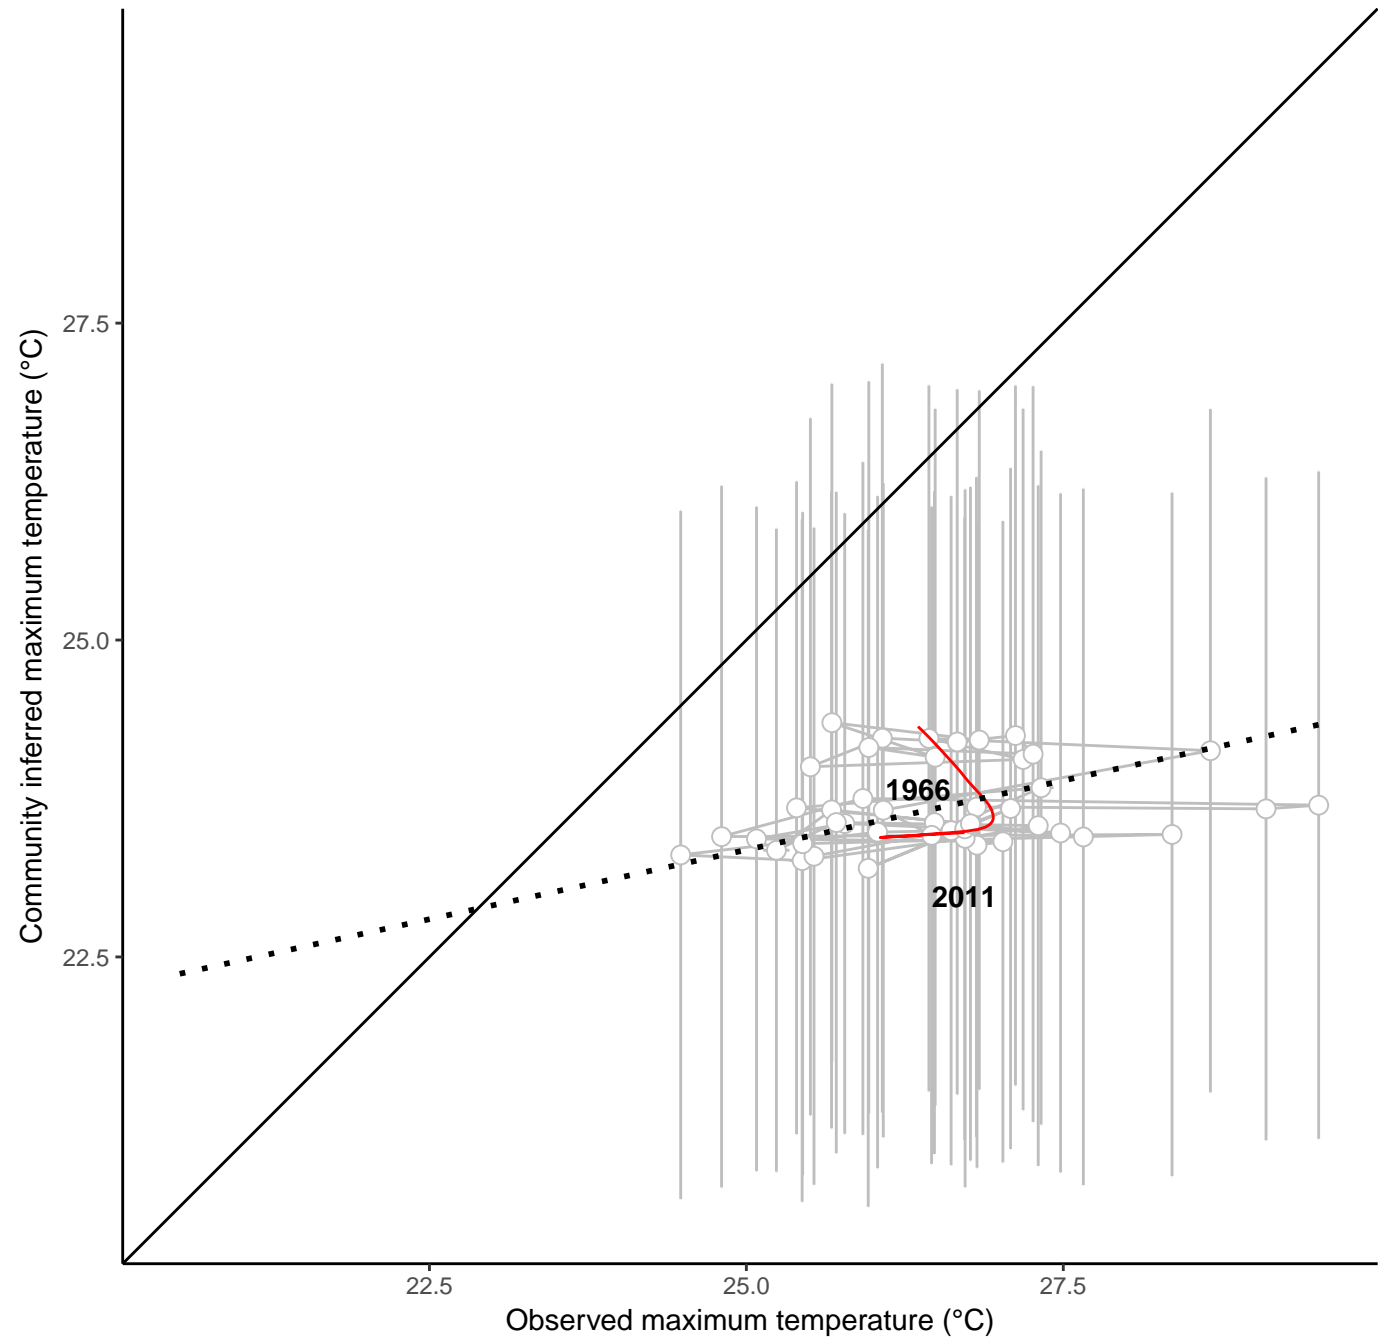

site : 840\_34\_55

absolute deviation = 3.67 | deviation change = 1.18 | maximum state number = 2

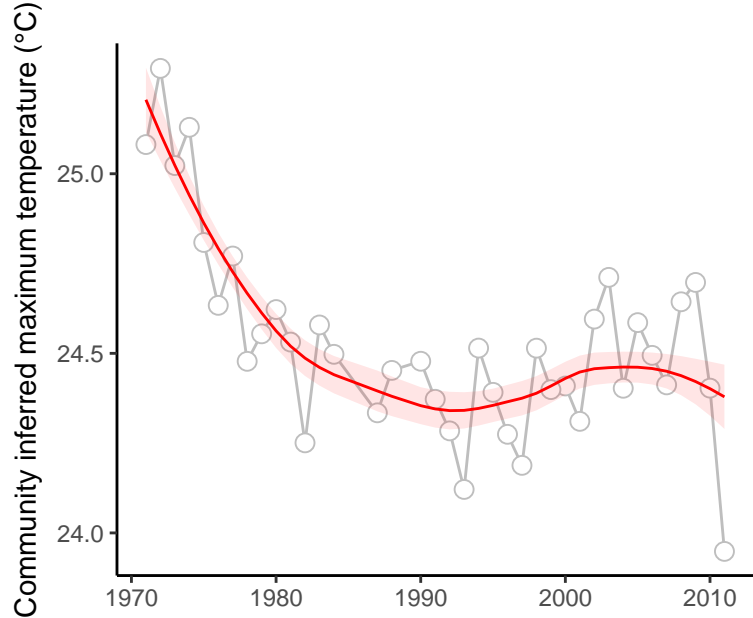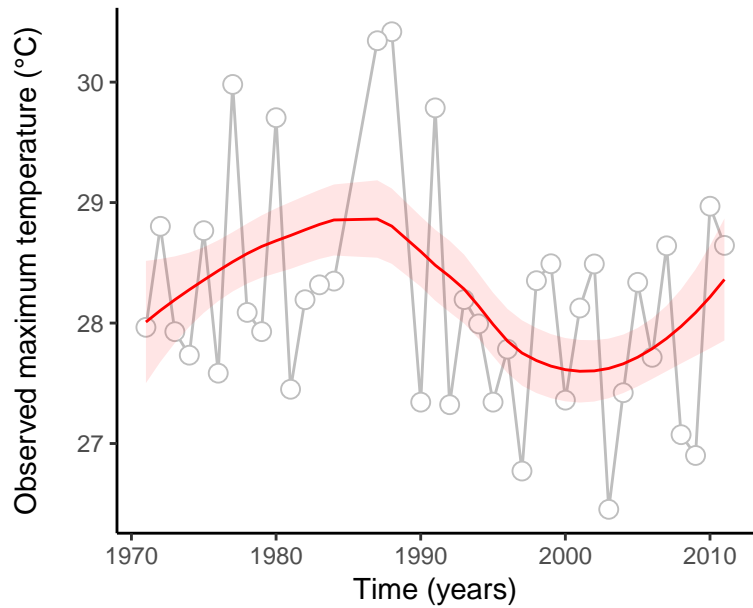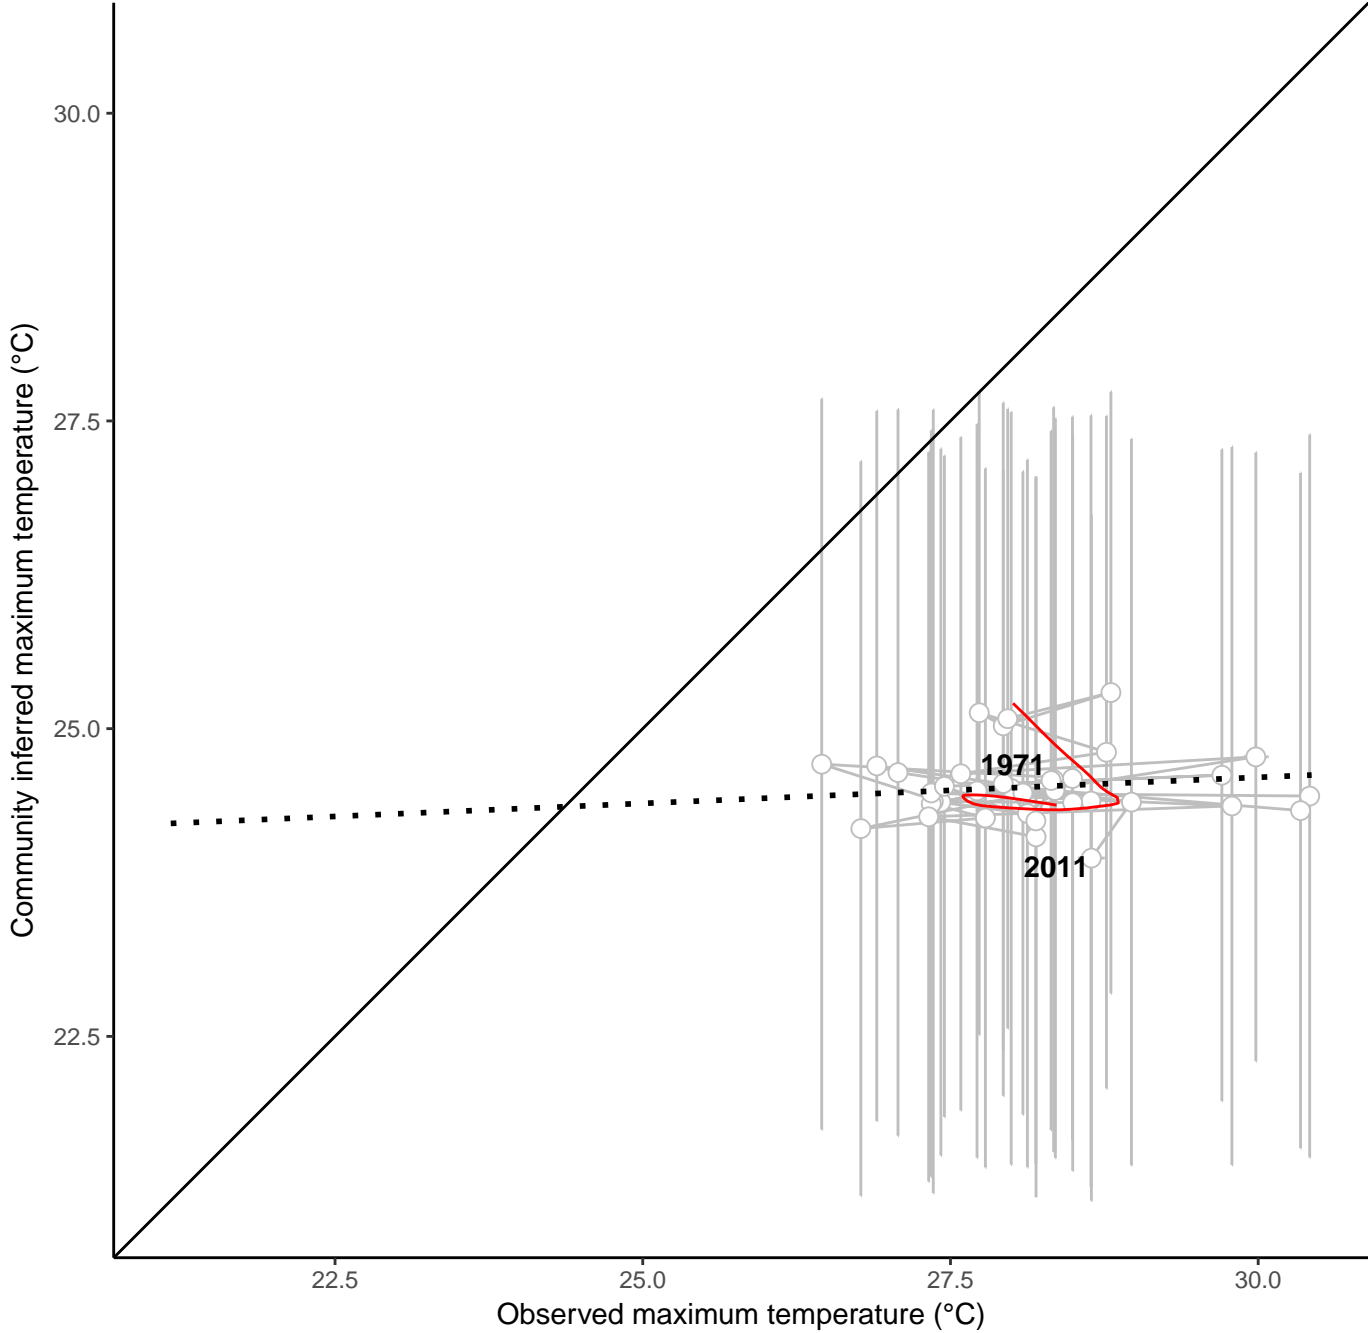

site : 840\_36\_17

absolute deviation = 2.19 | deviation change = 1.33 | maximum state number = 1

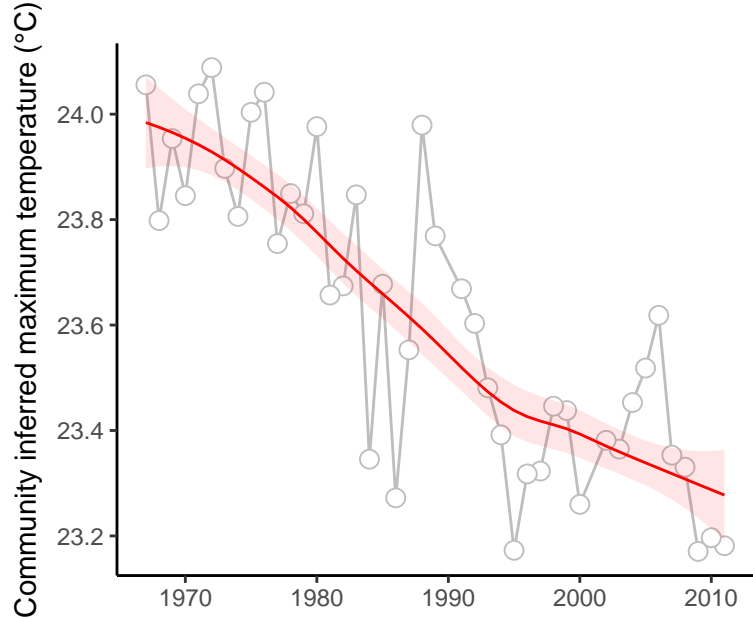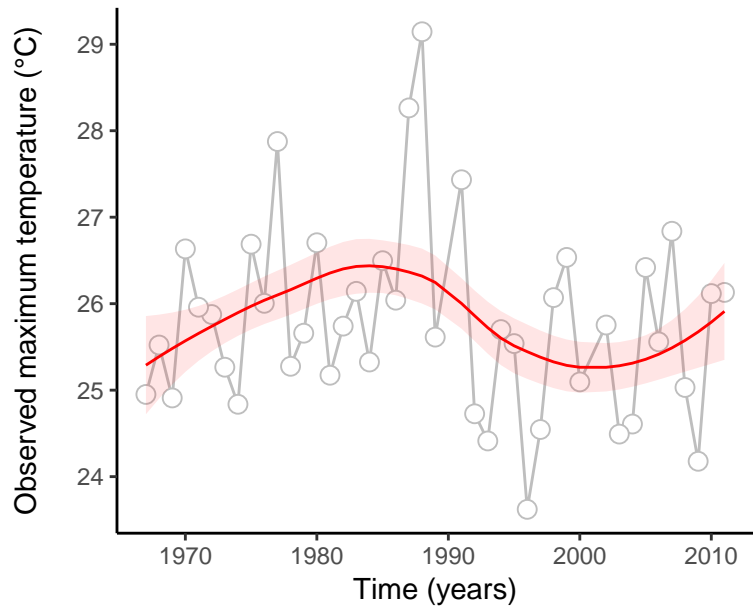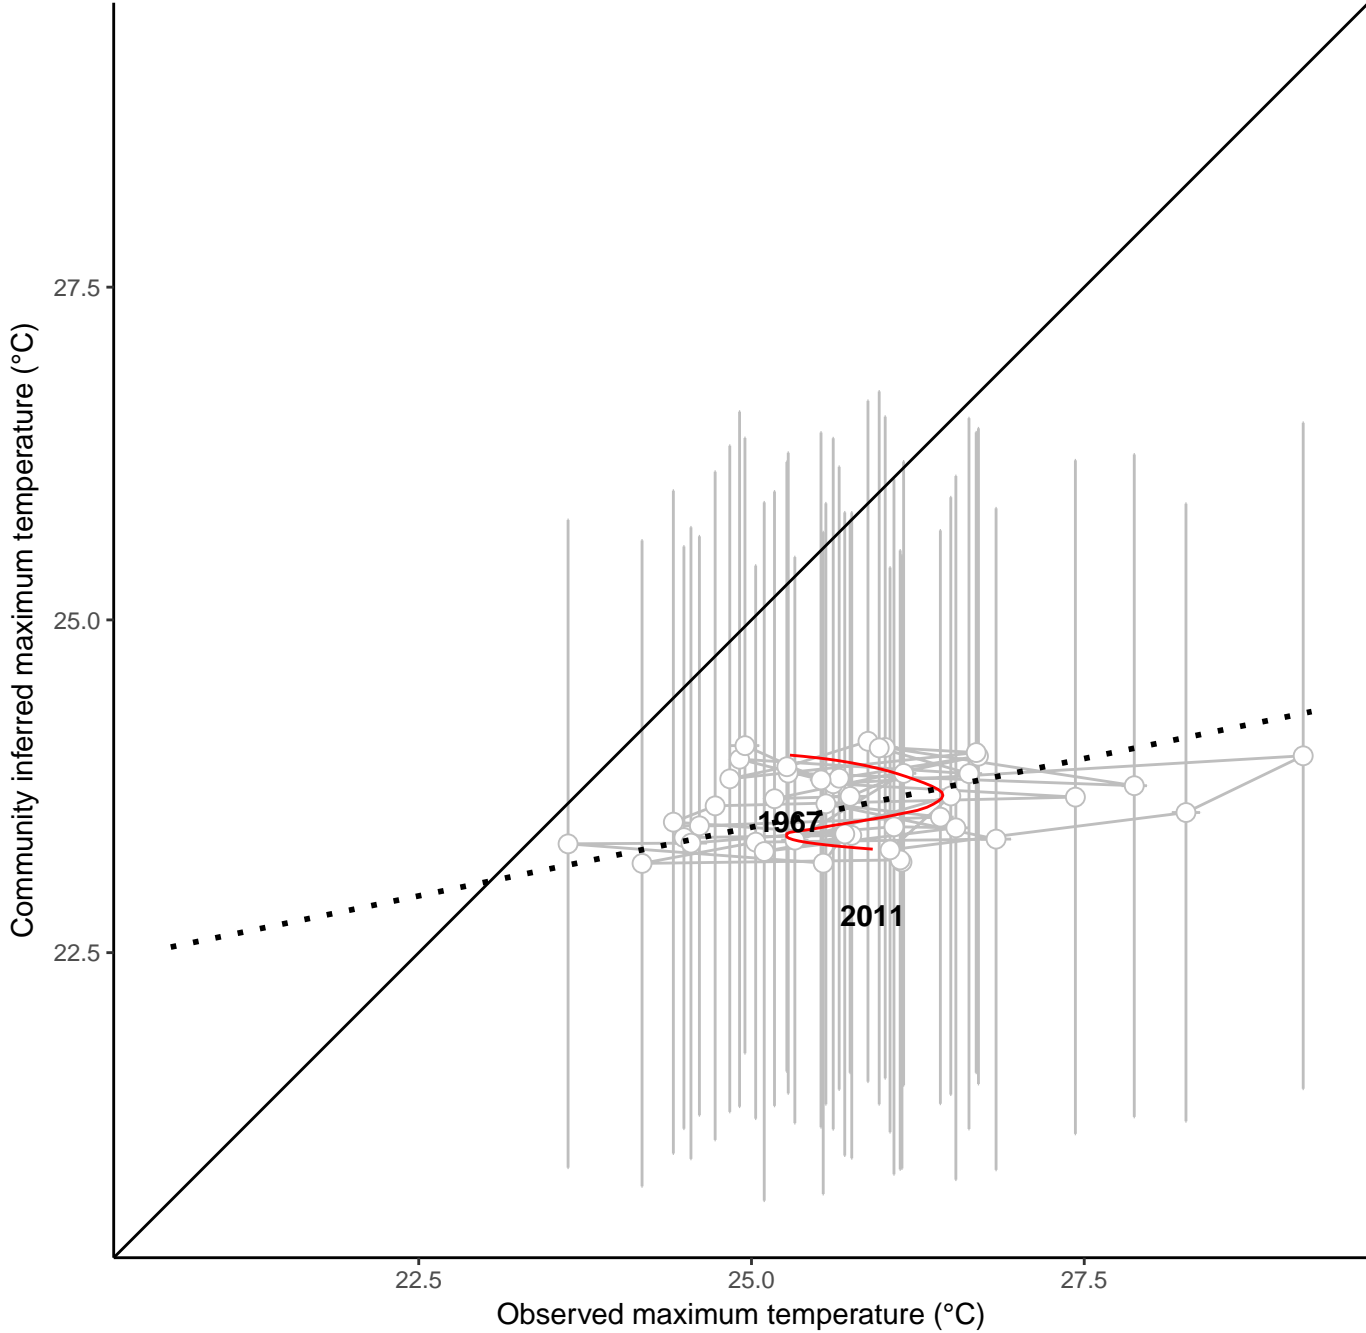

site : 840\_44\_4

absolute deviation = 2.16 | deviation change = -0.29 | maximum state number = 1

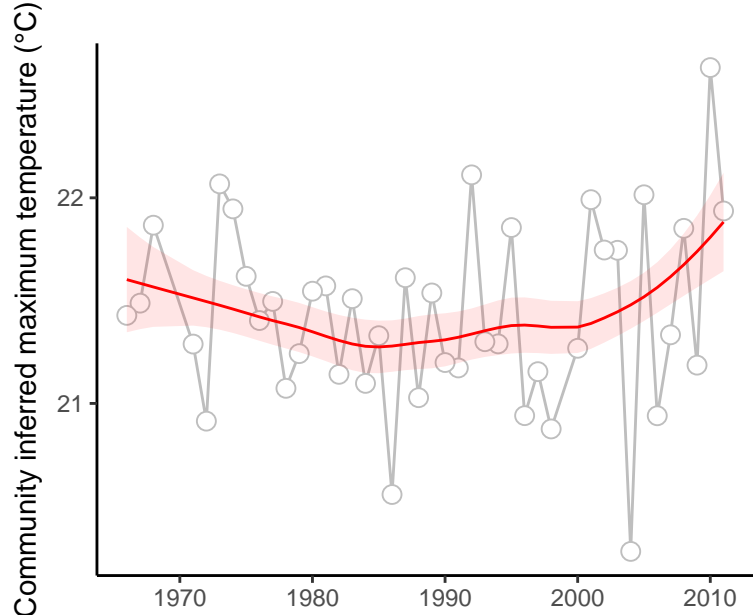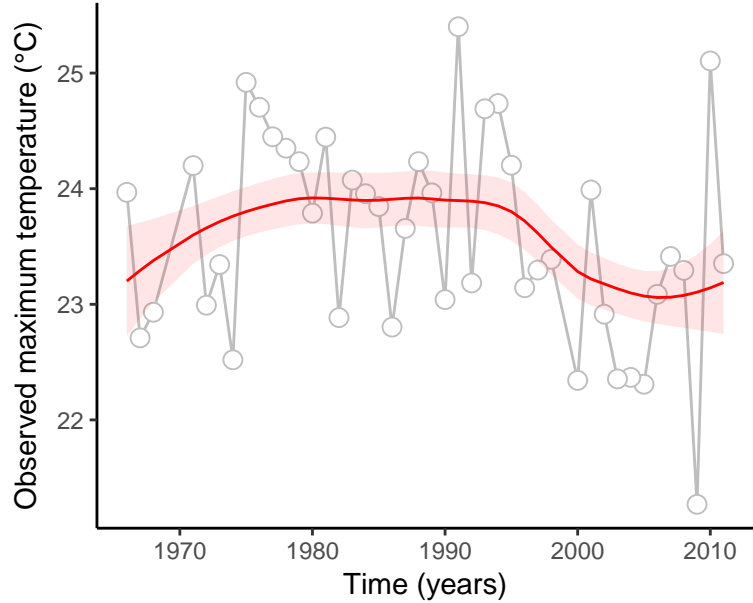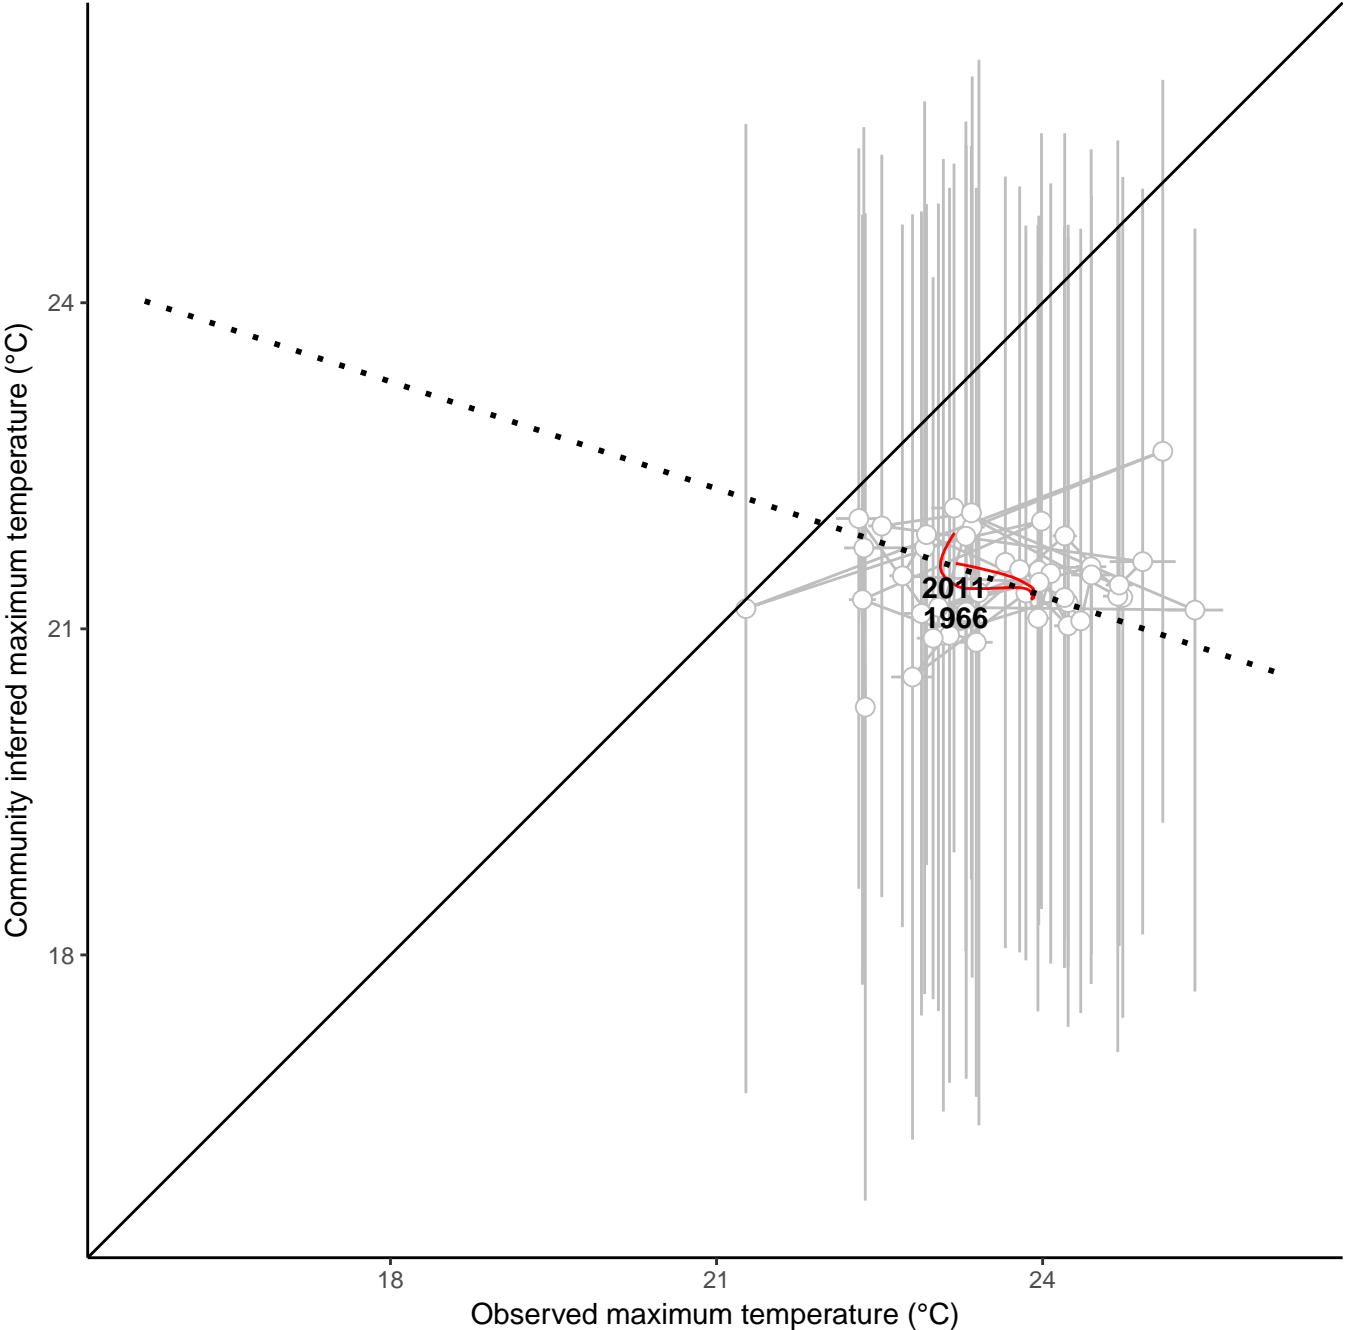

site : 840\_49\_53

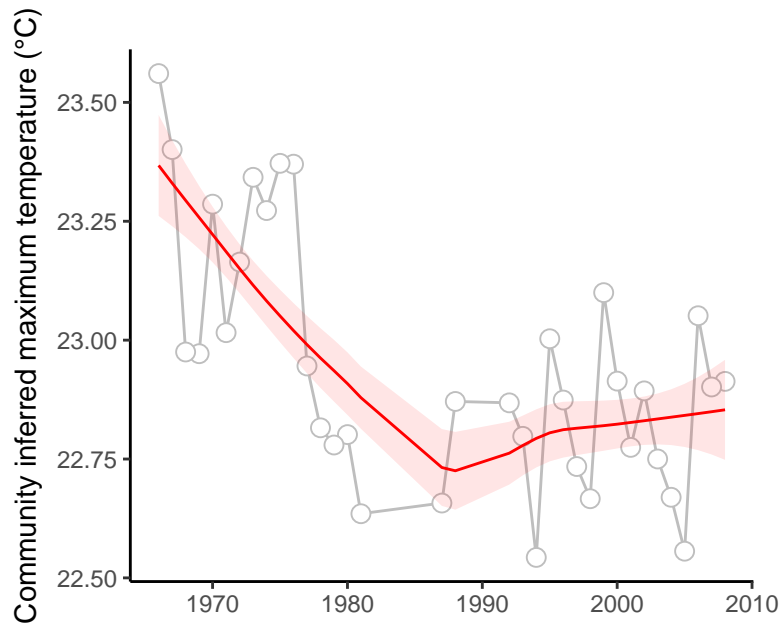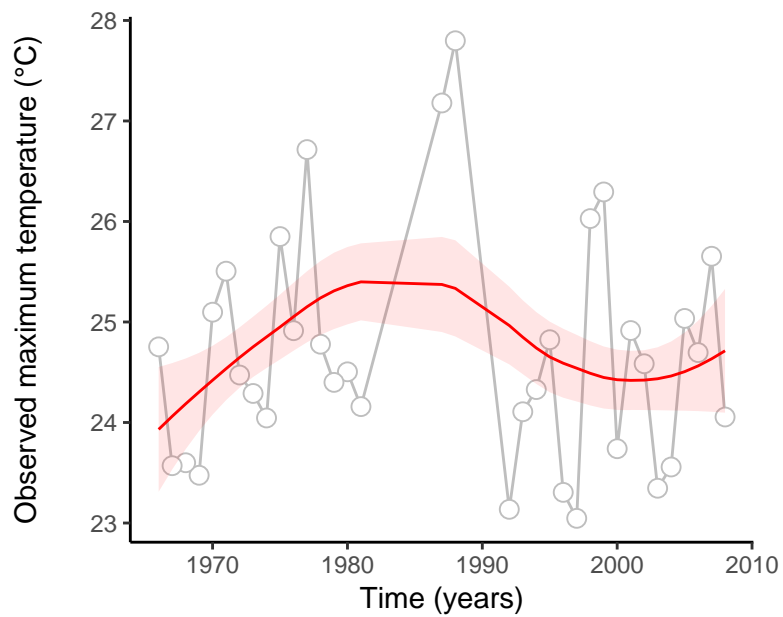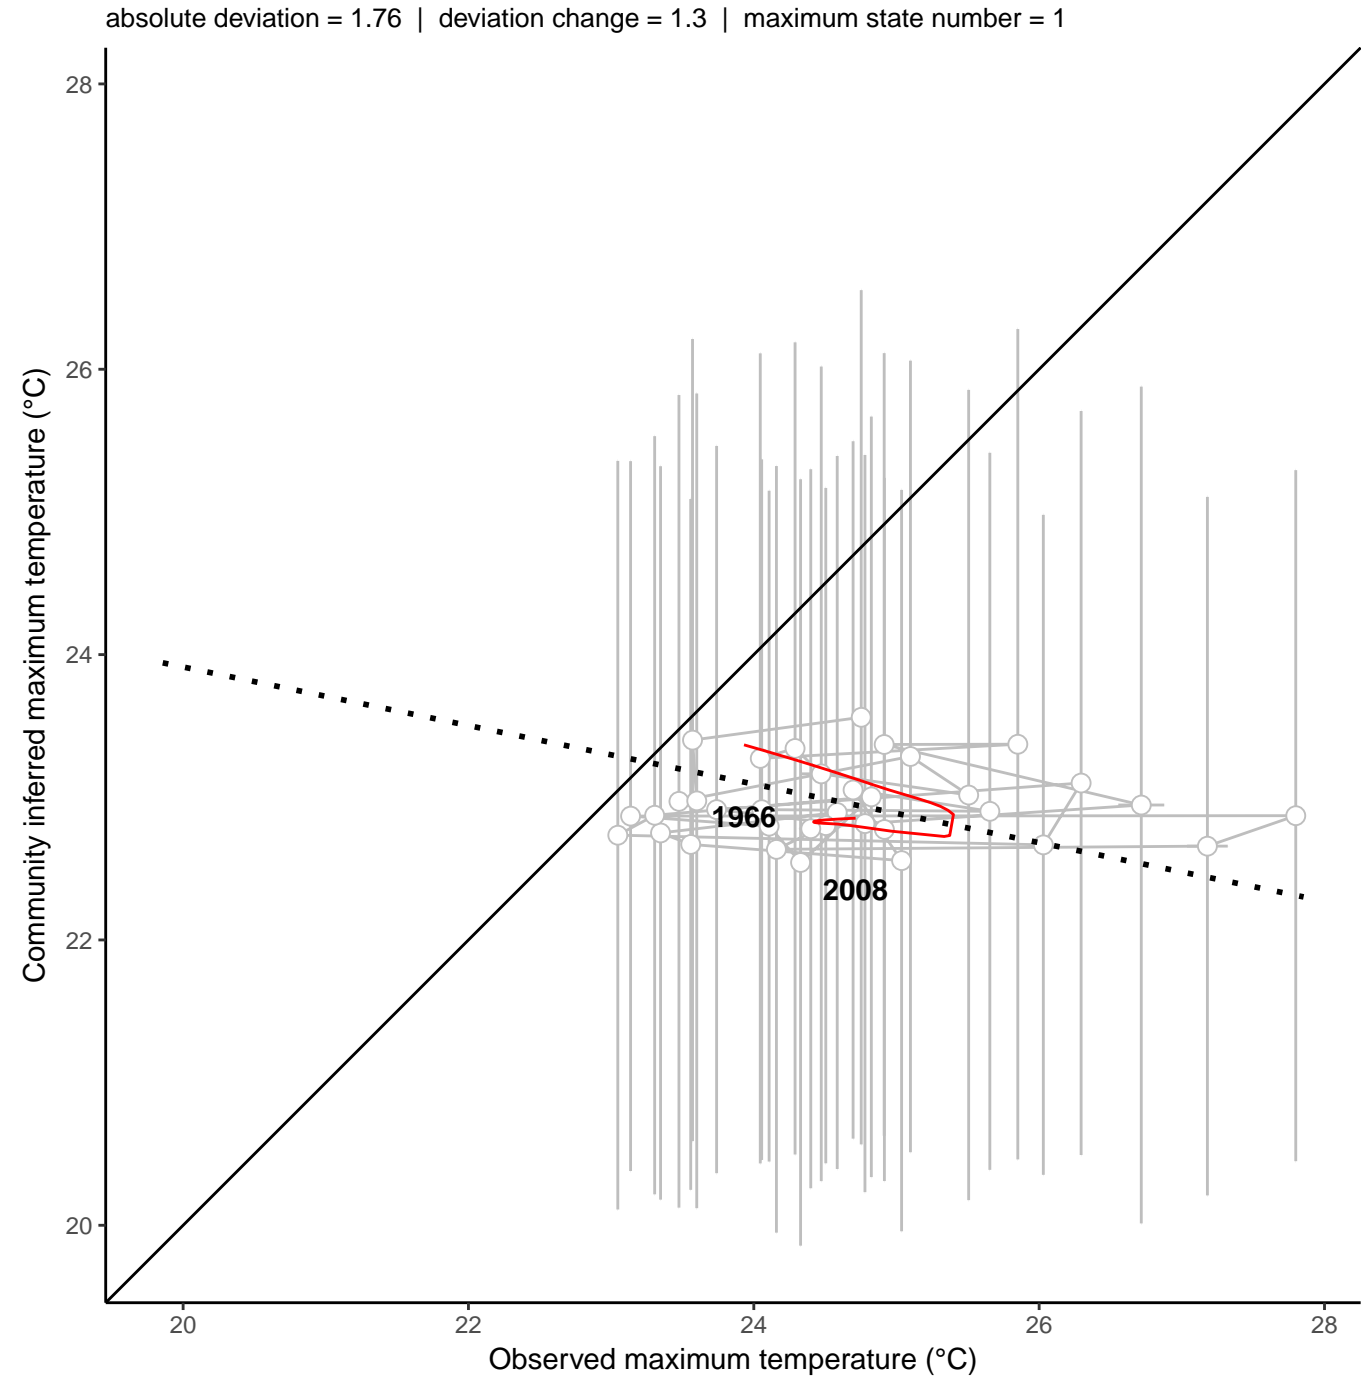

site : 840\_50\_7

absolute deviation = 1.44 | deviation change = 0.78 | maximum state number = 1

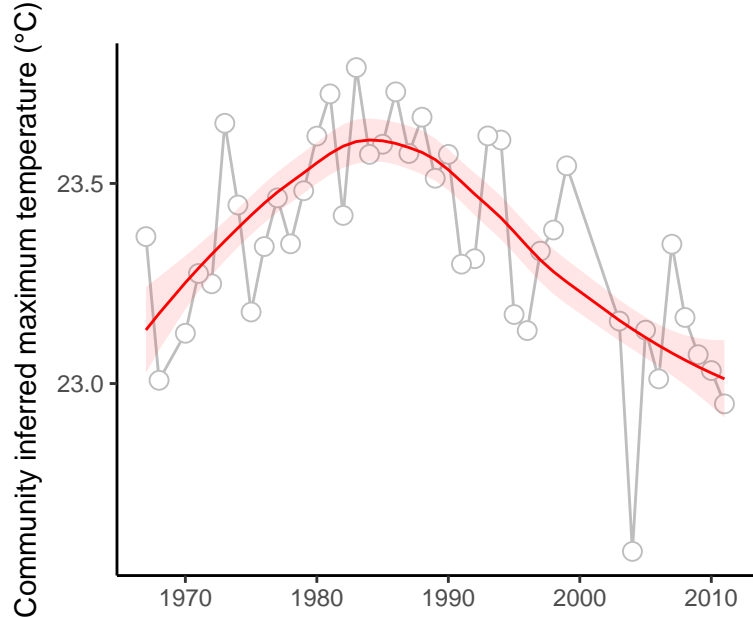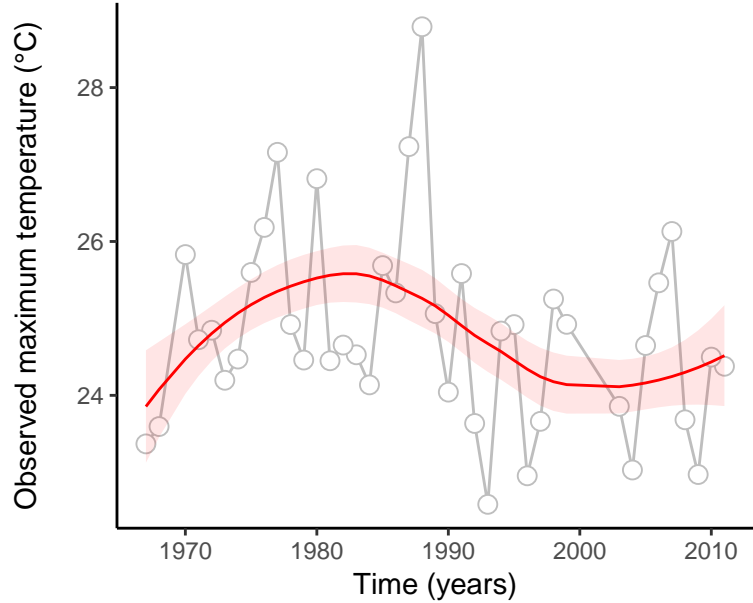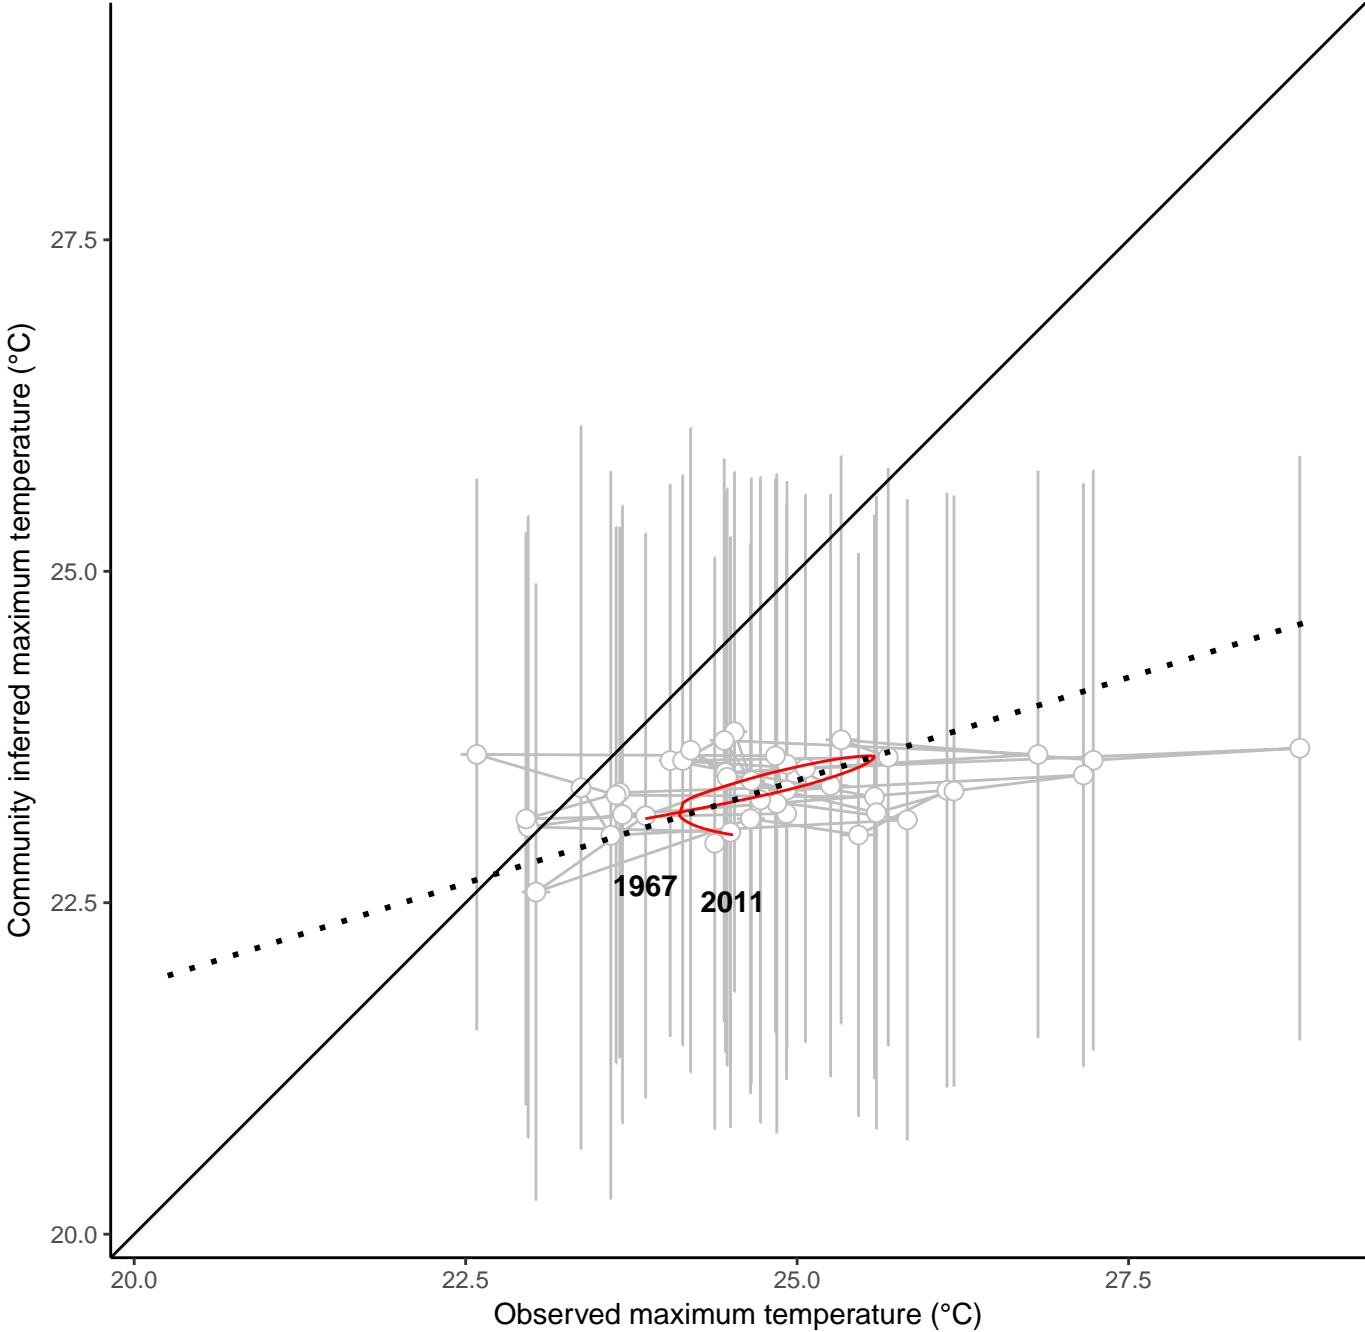

site : 840\_50\_8

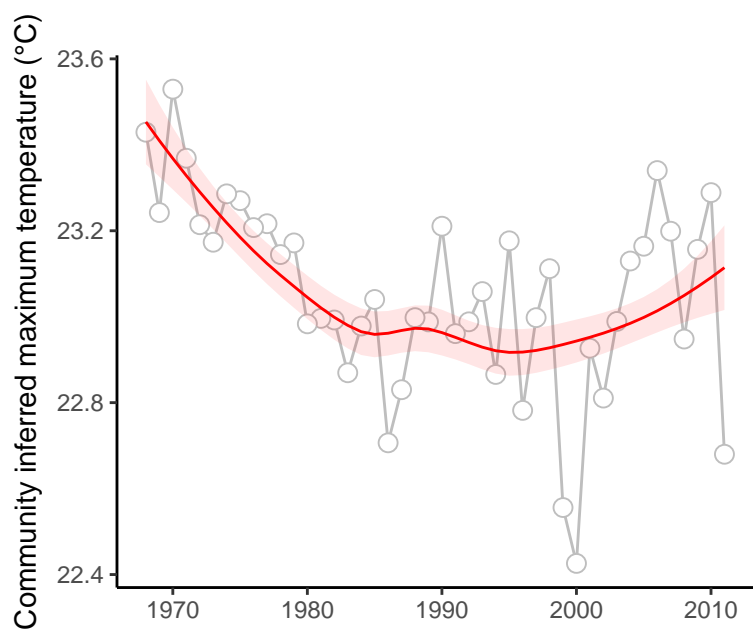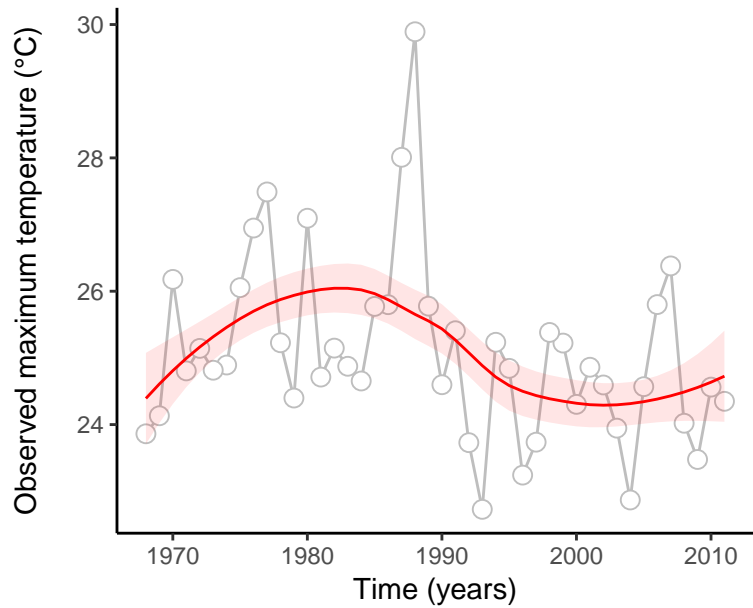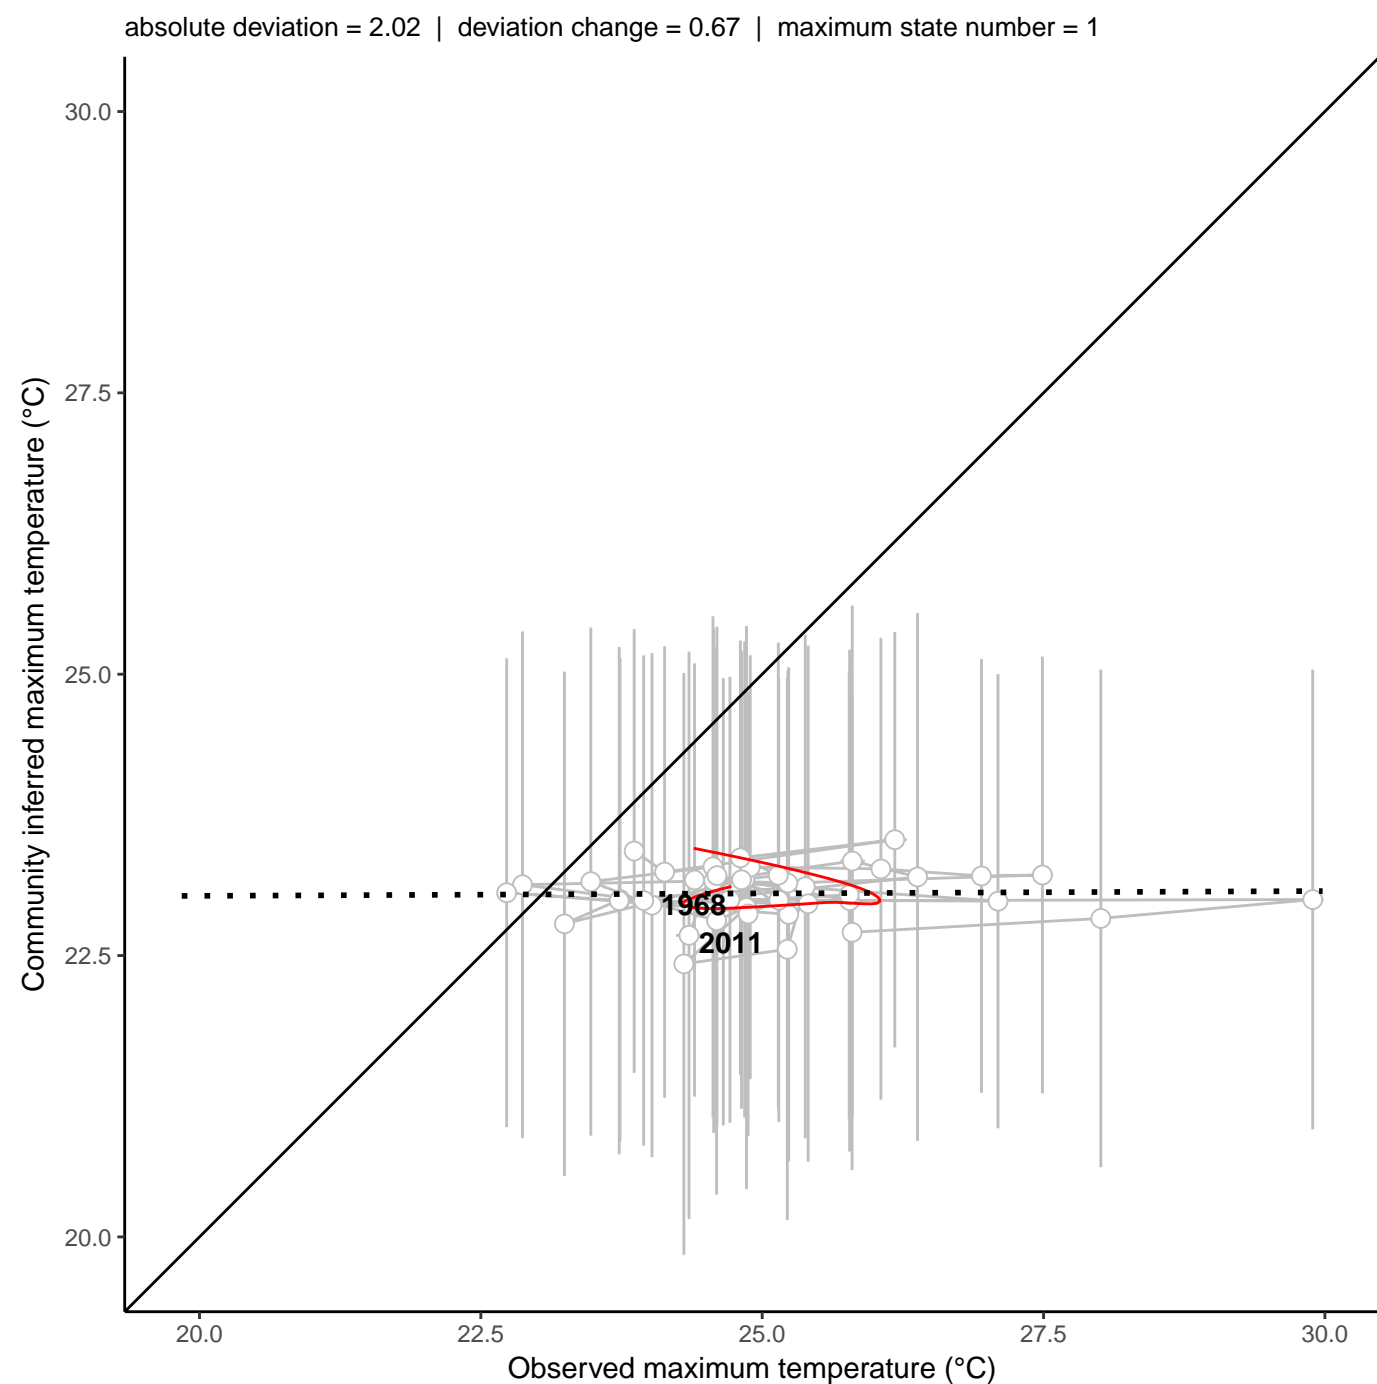

site : 840\_58\_17

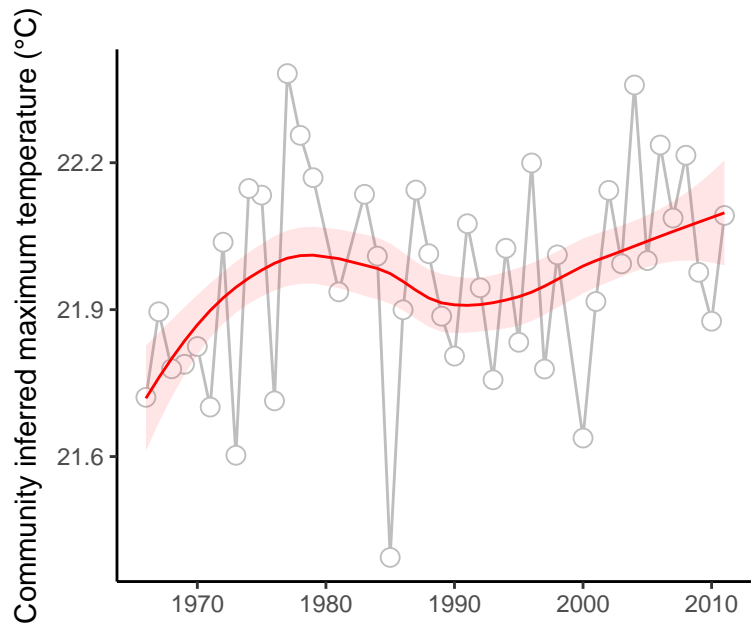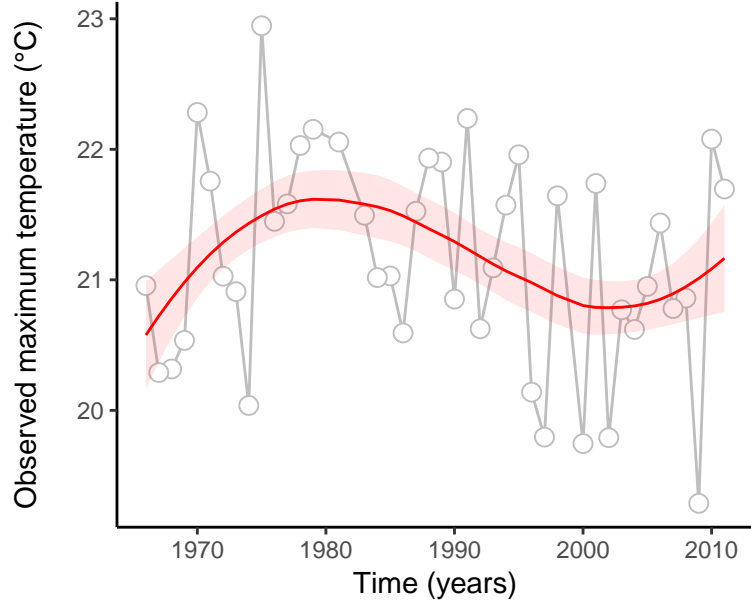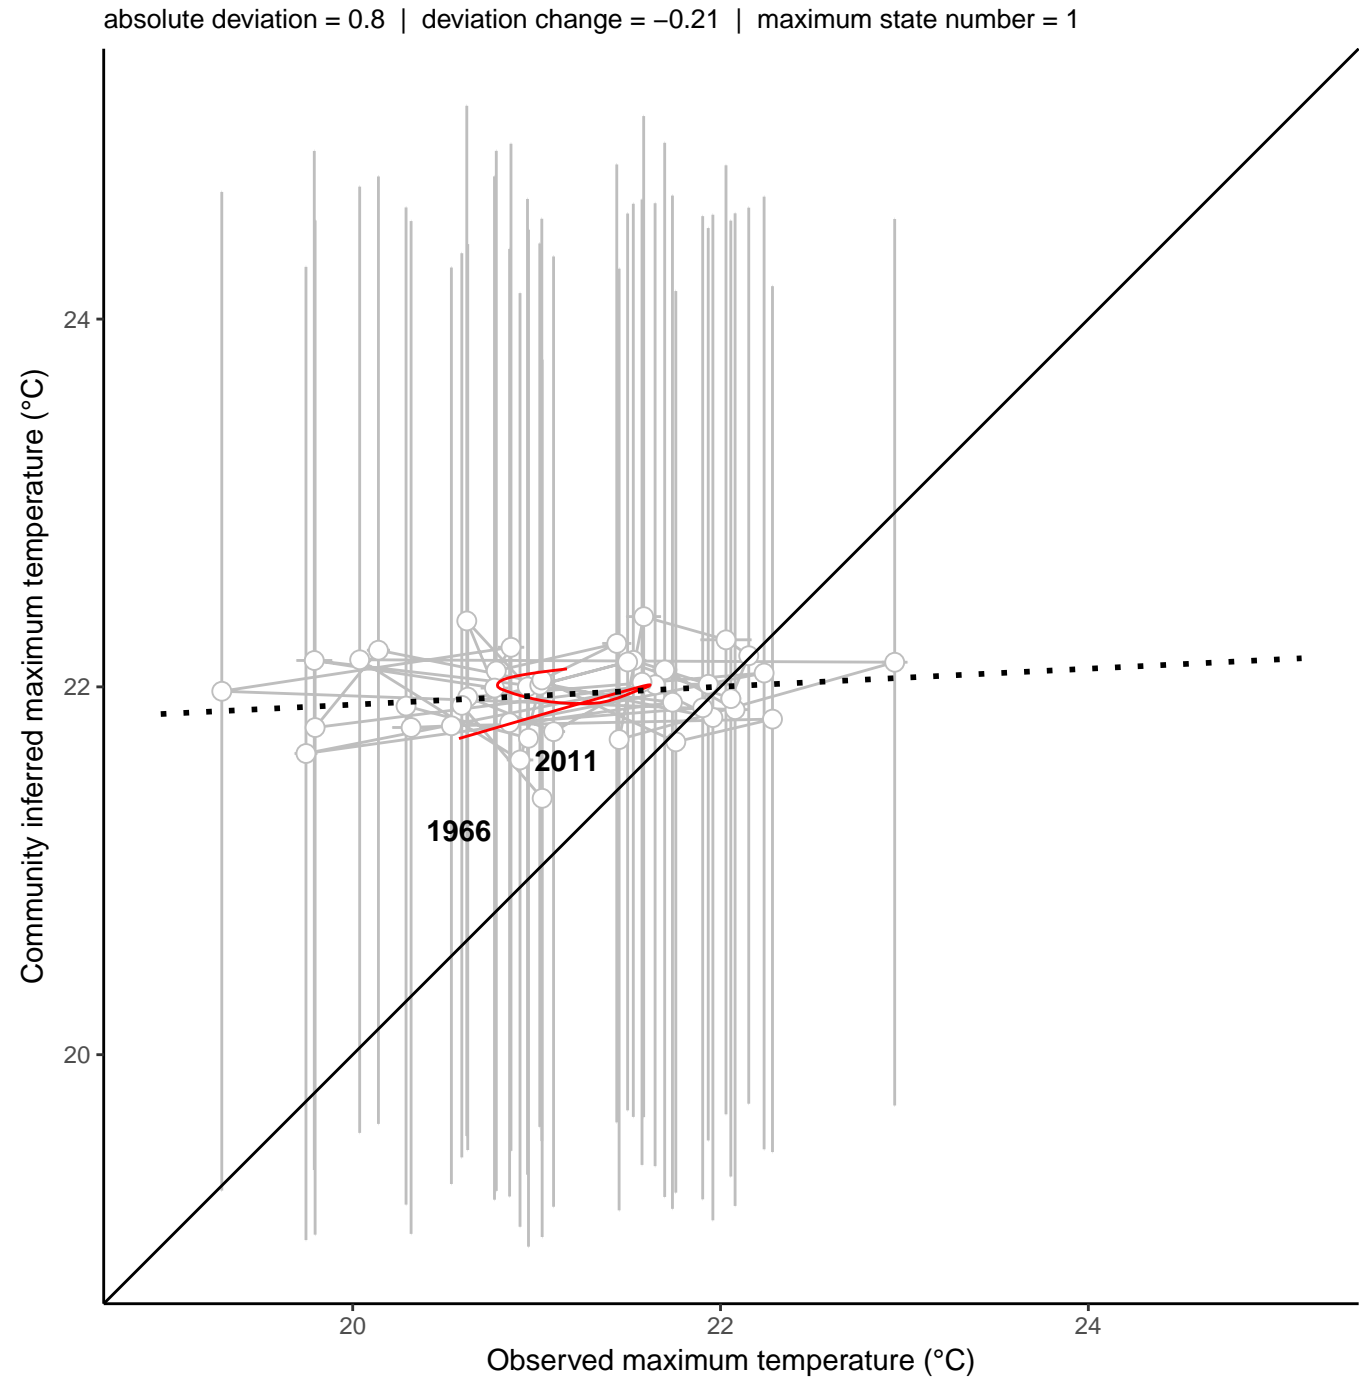



site : 840\_60\_20

absolute deviation = 4.24 | deviation change = -0.12 | maximum state number = 2

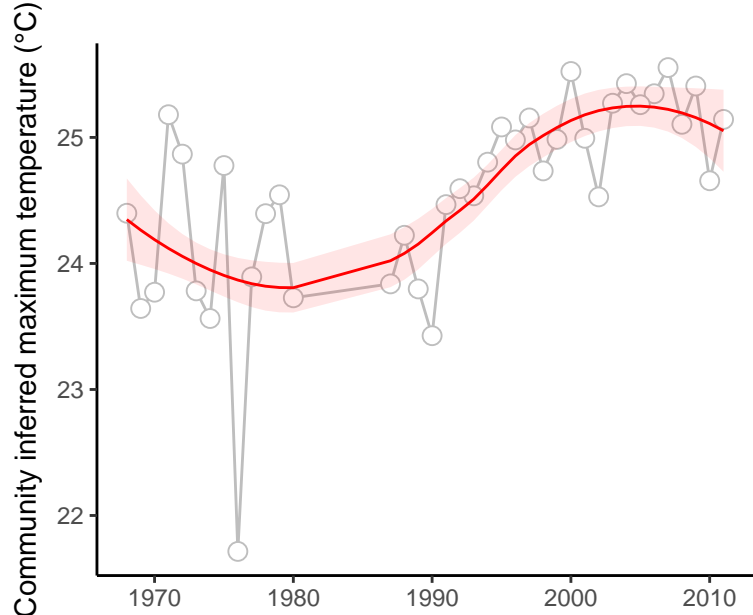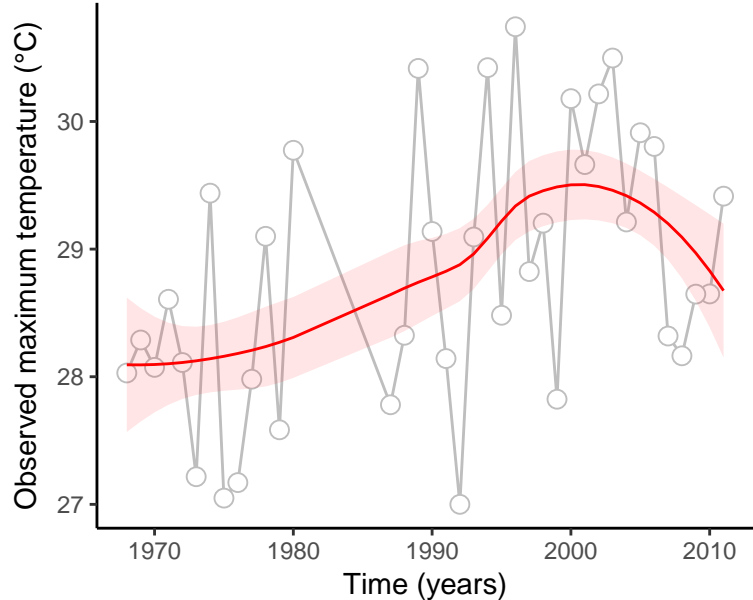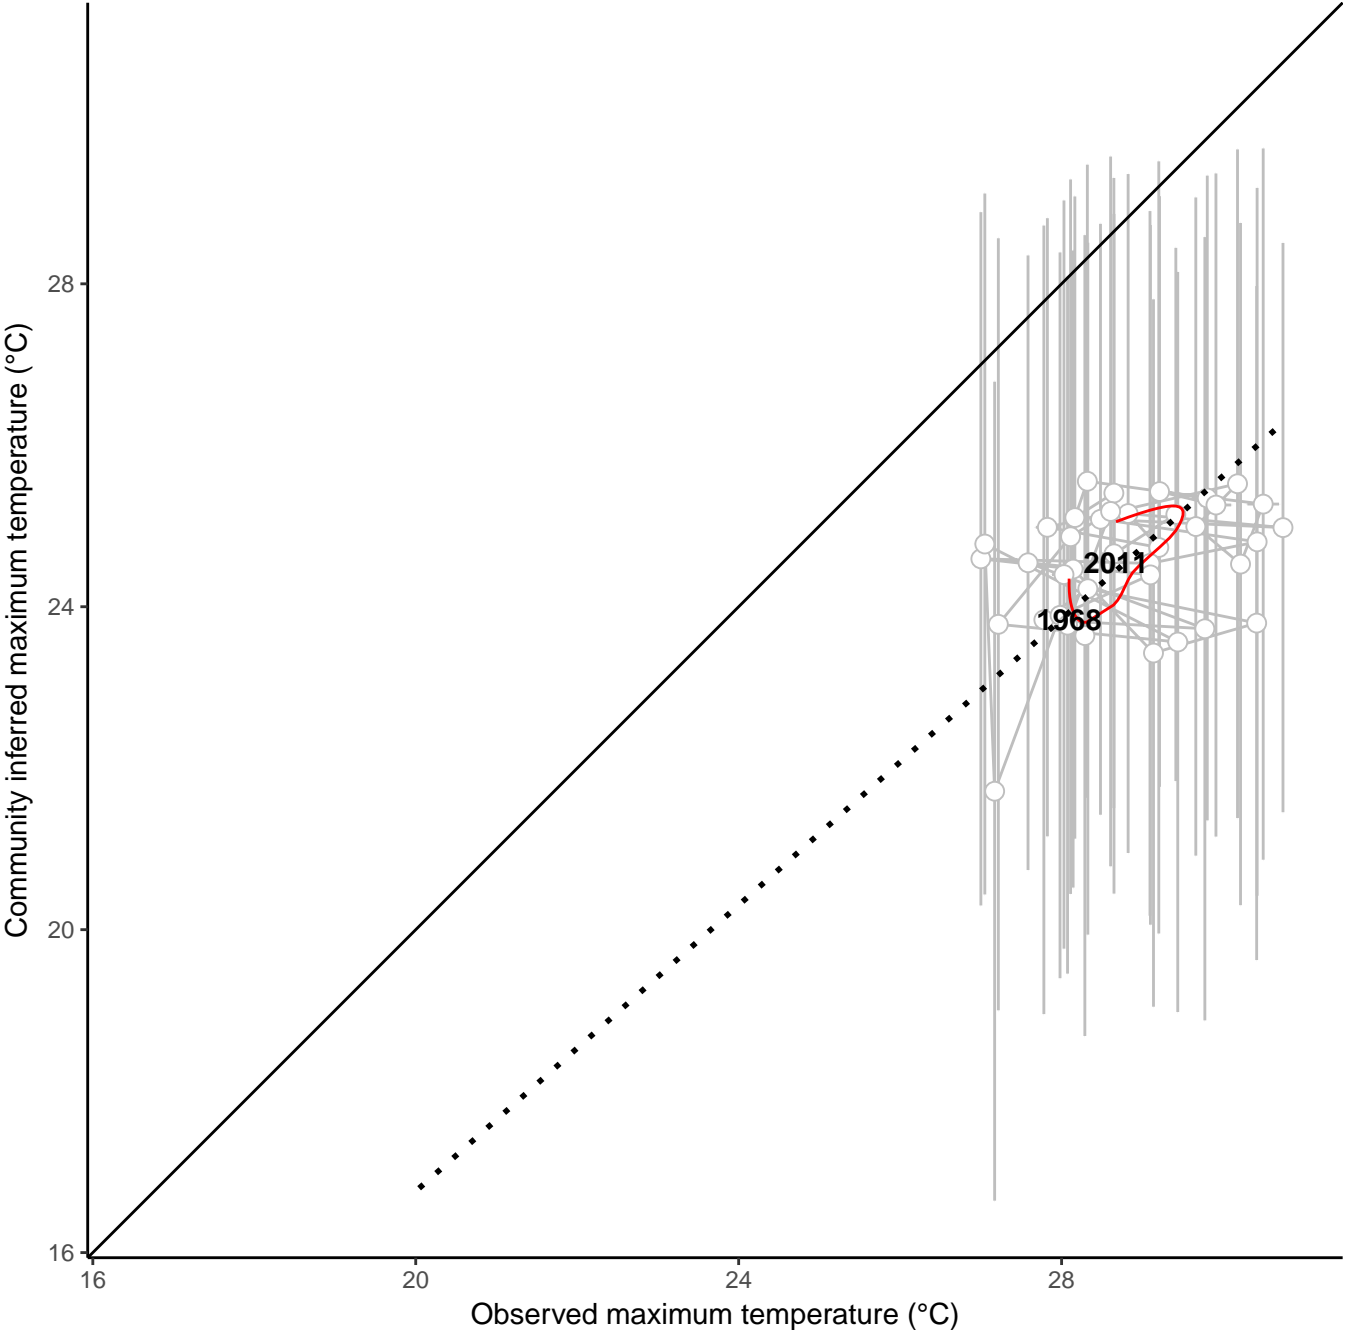

site : 840\_61\_55

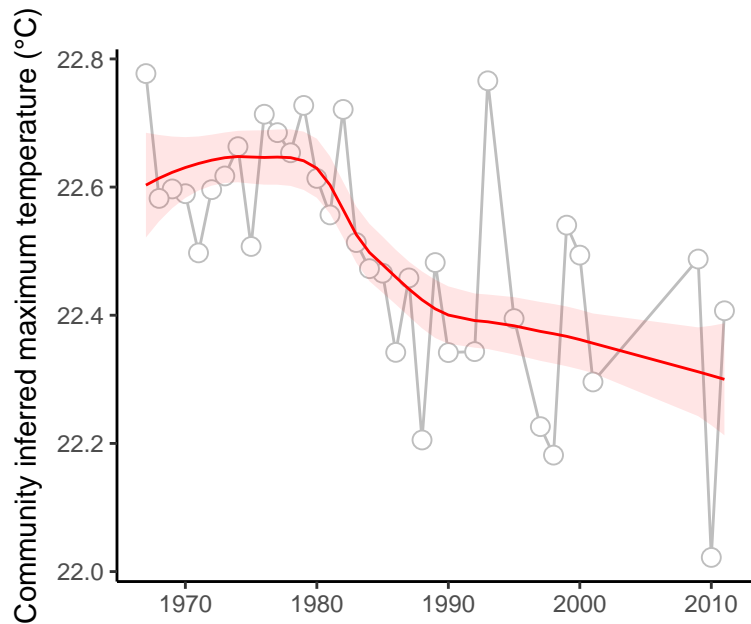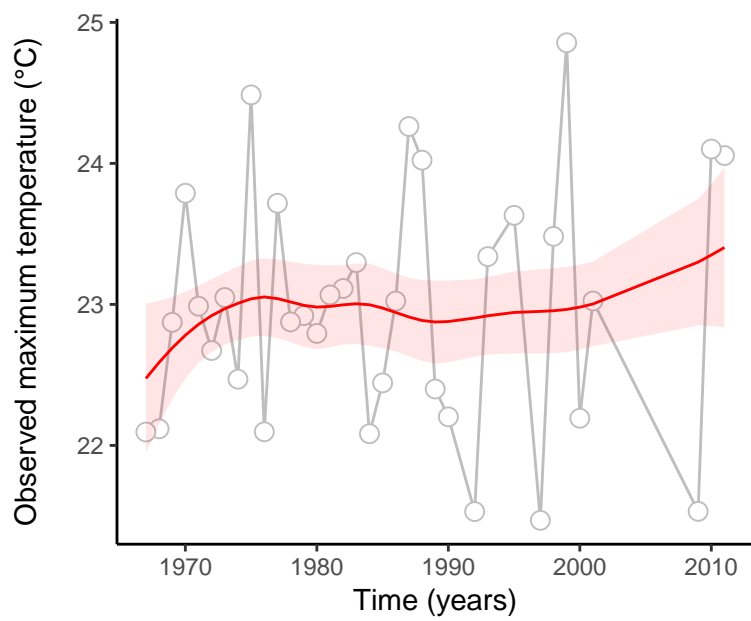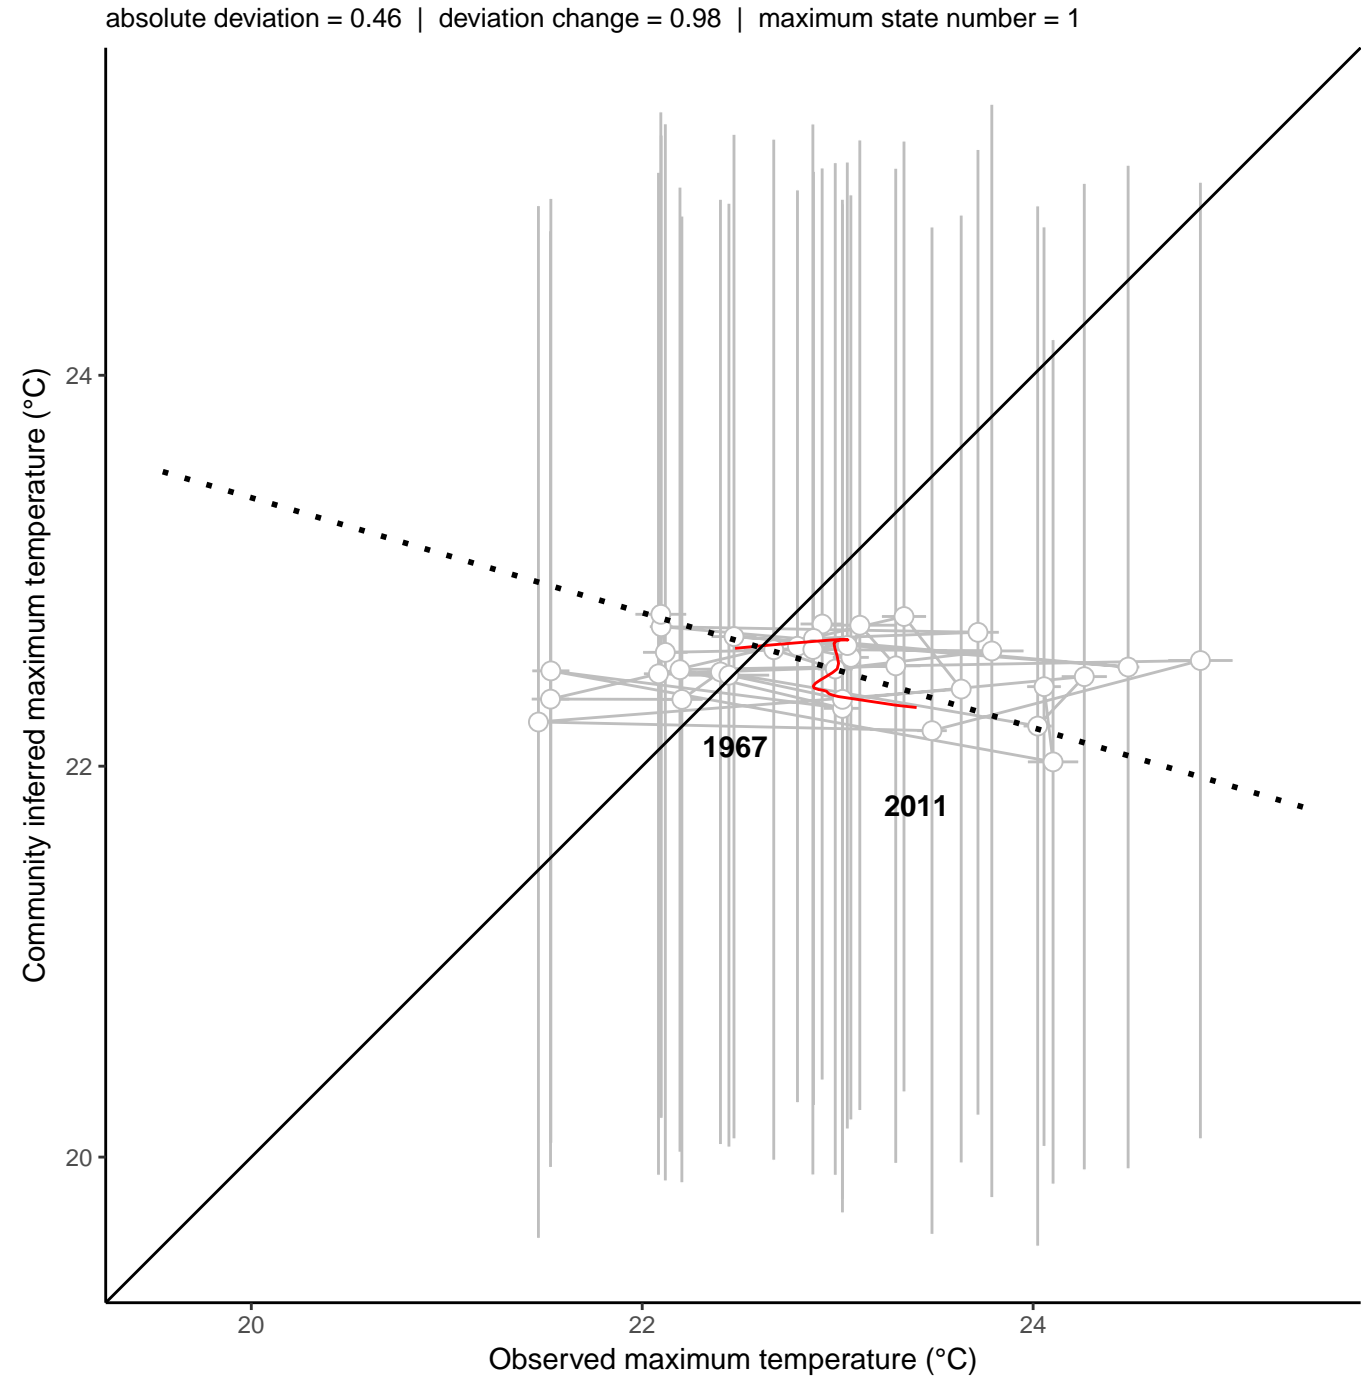

site : 840\_64\_7

absolute deviation = 0.62 | deviation change = -0.43 | maximum state number = 1

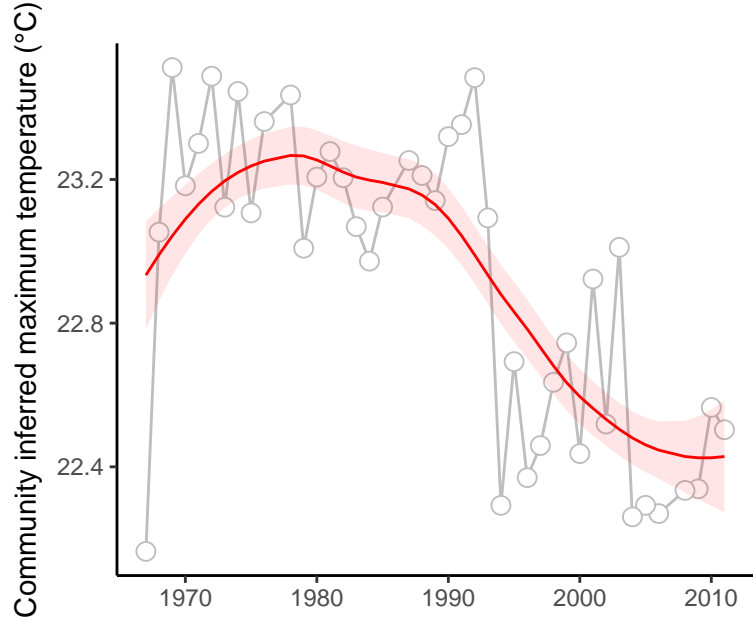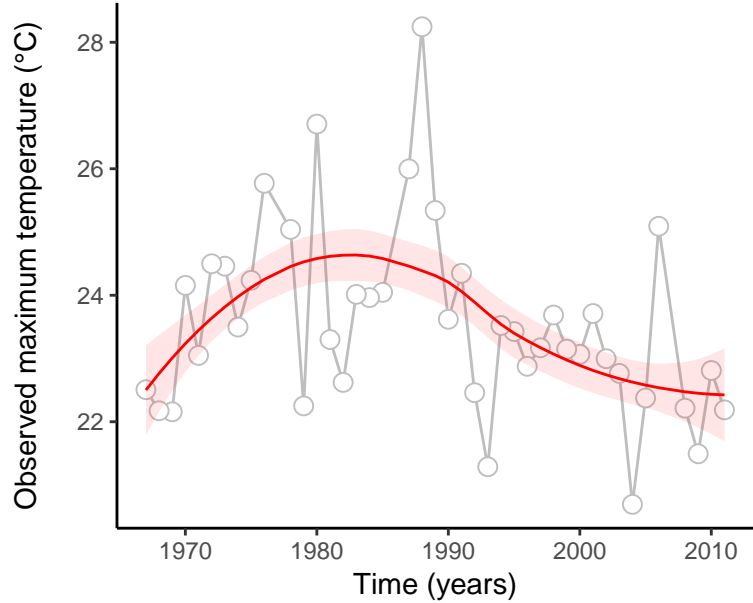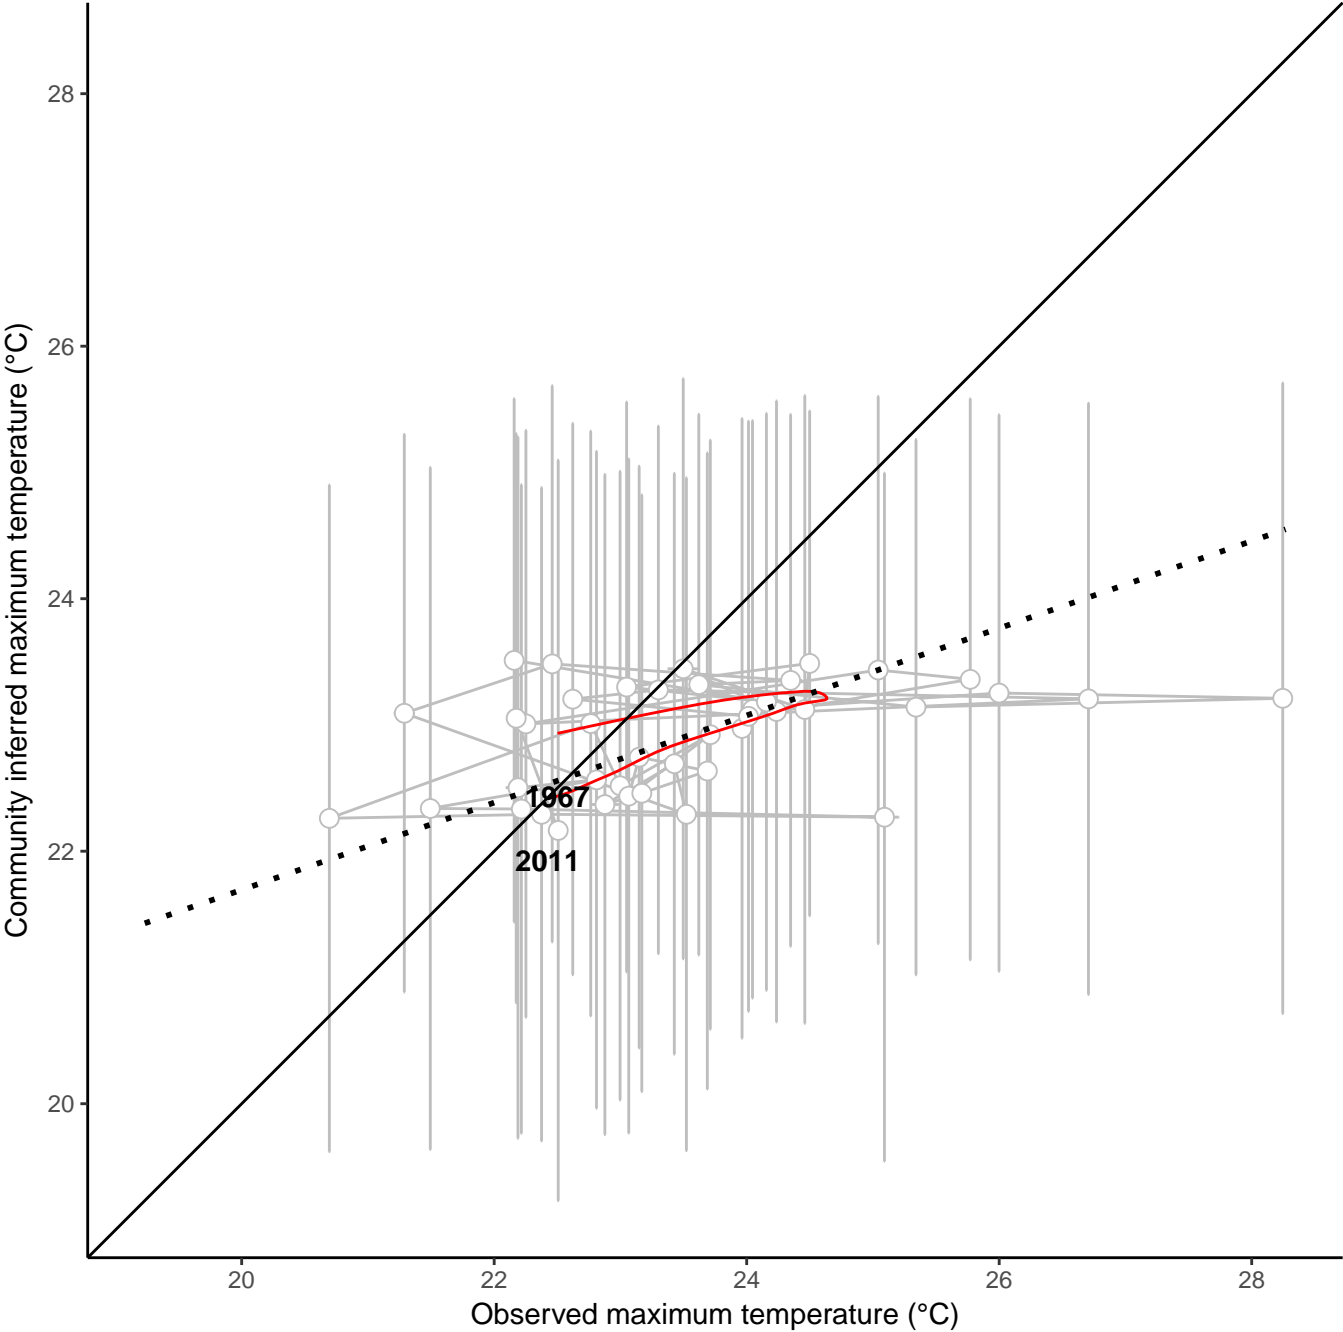

site : 840\_67\_14

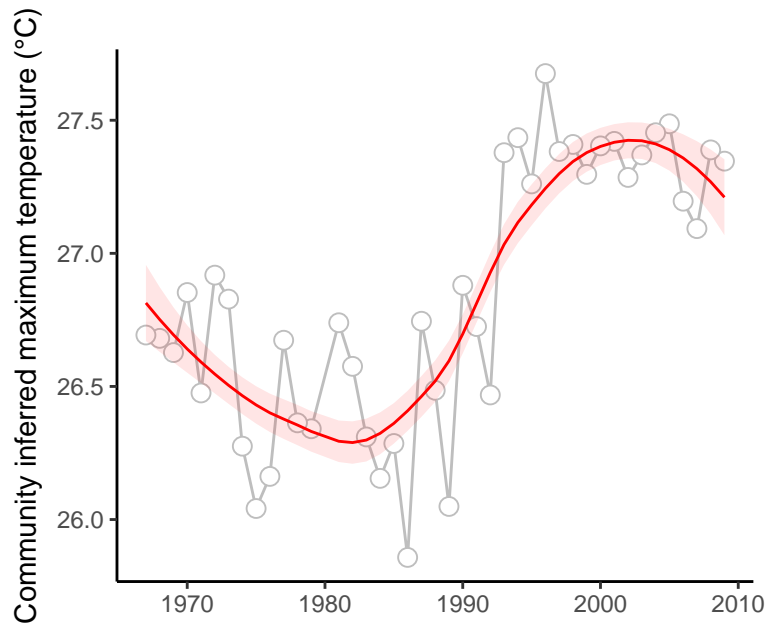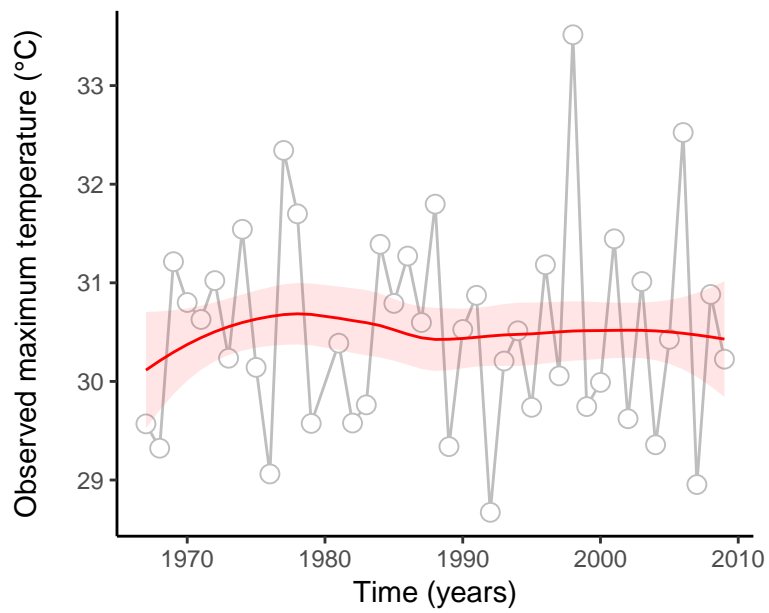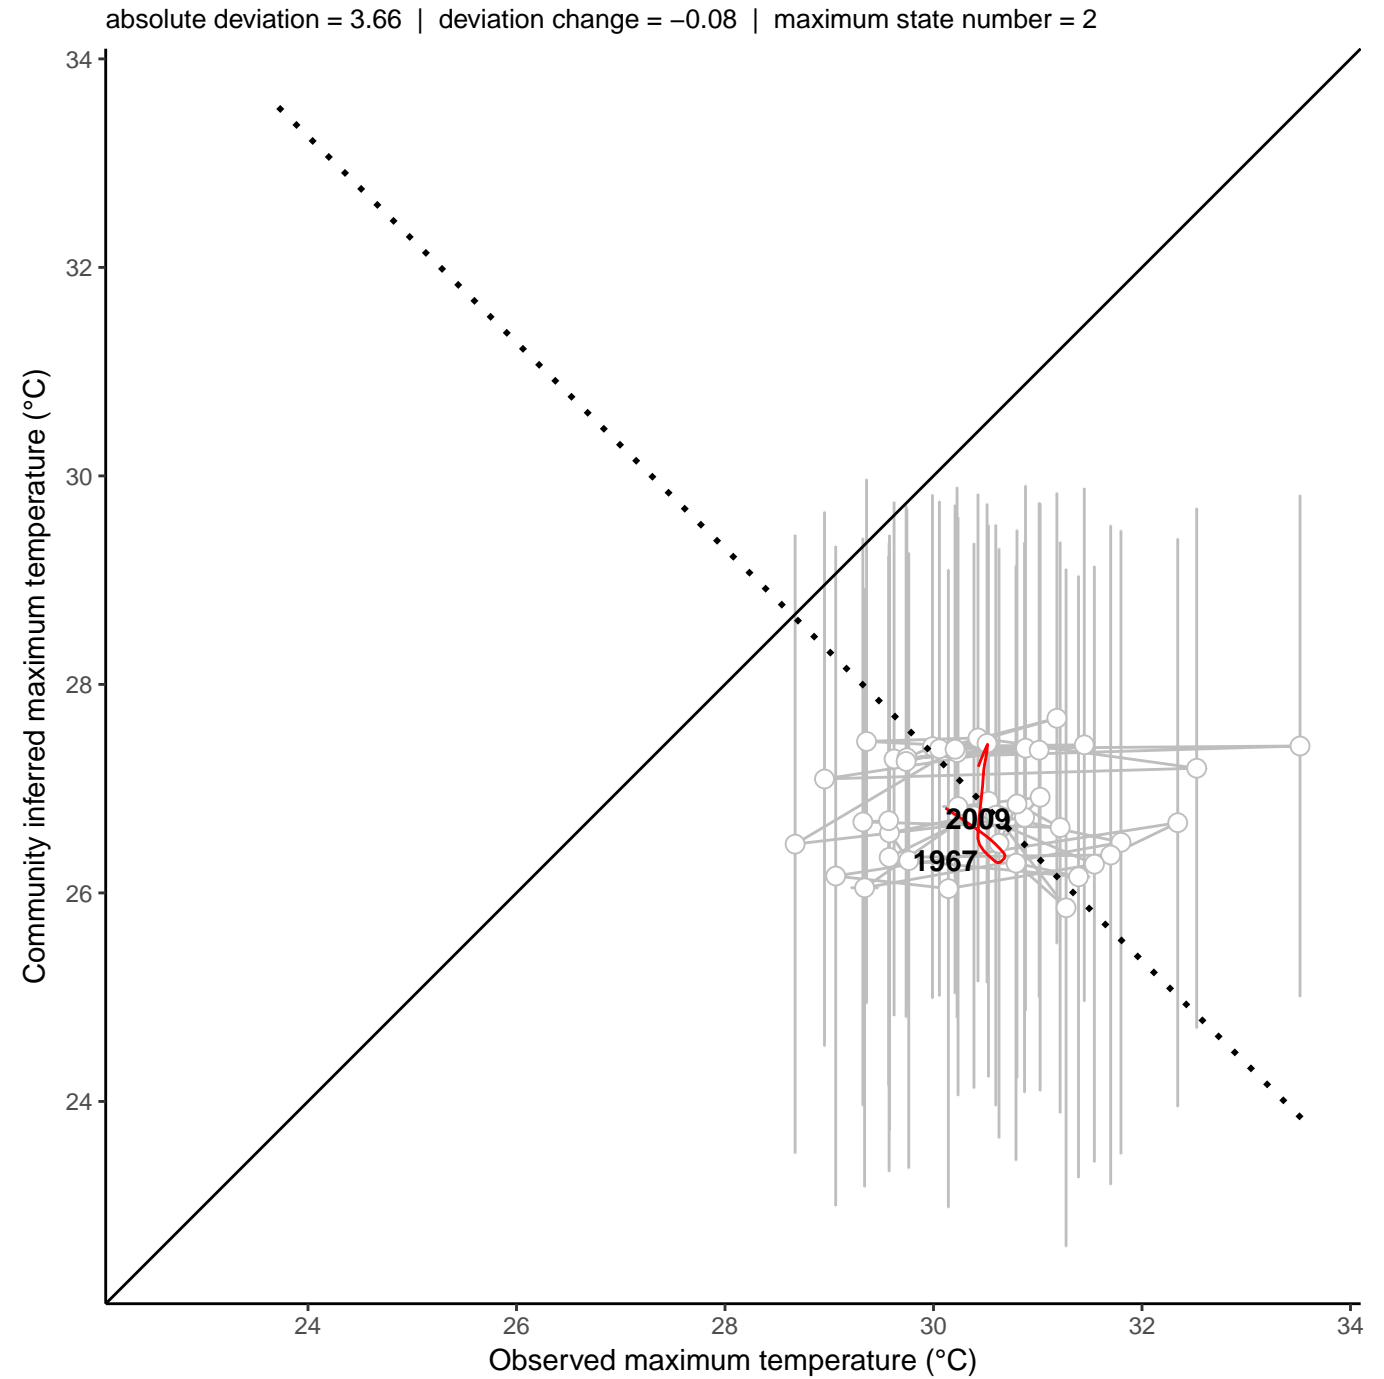

site : 840\_72\_16

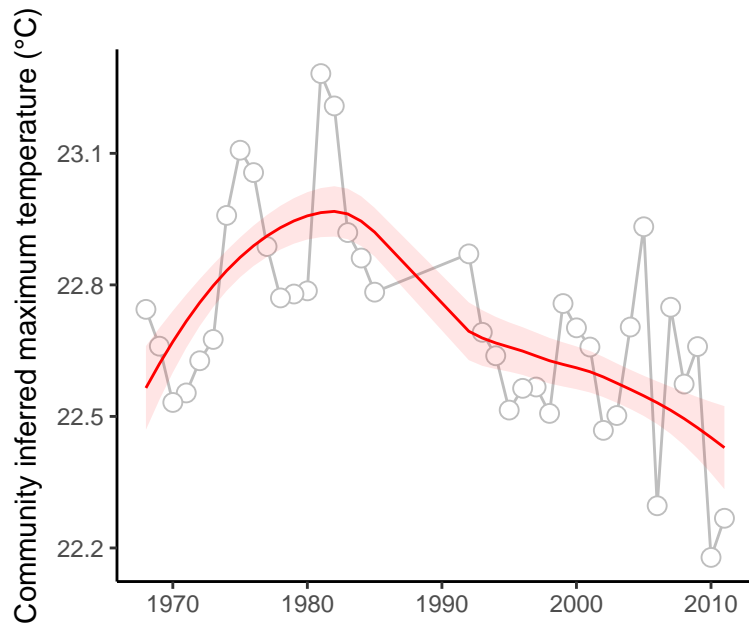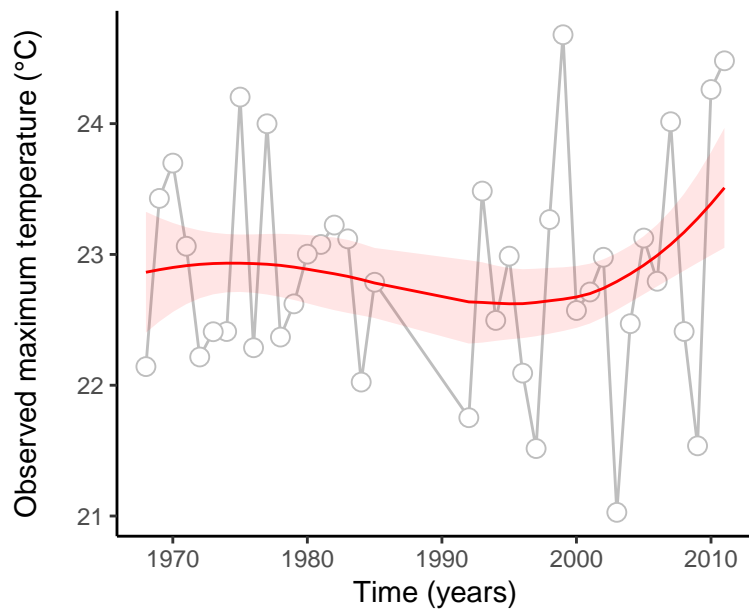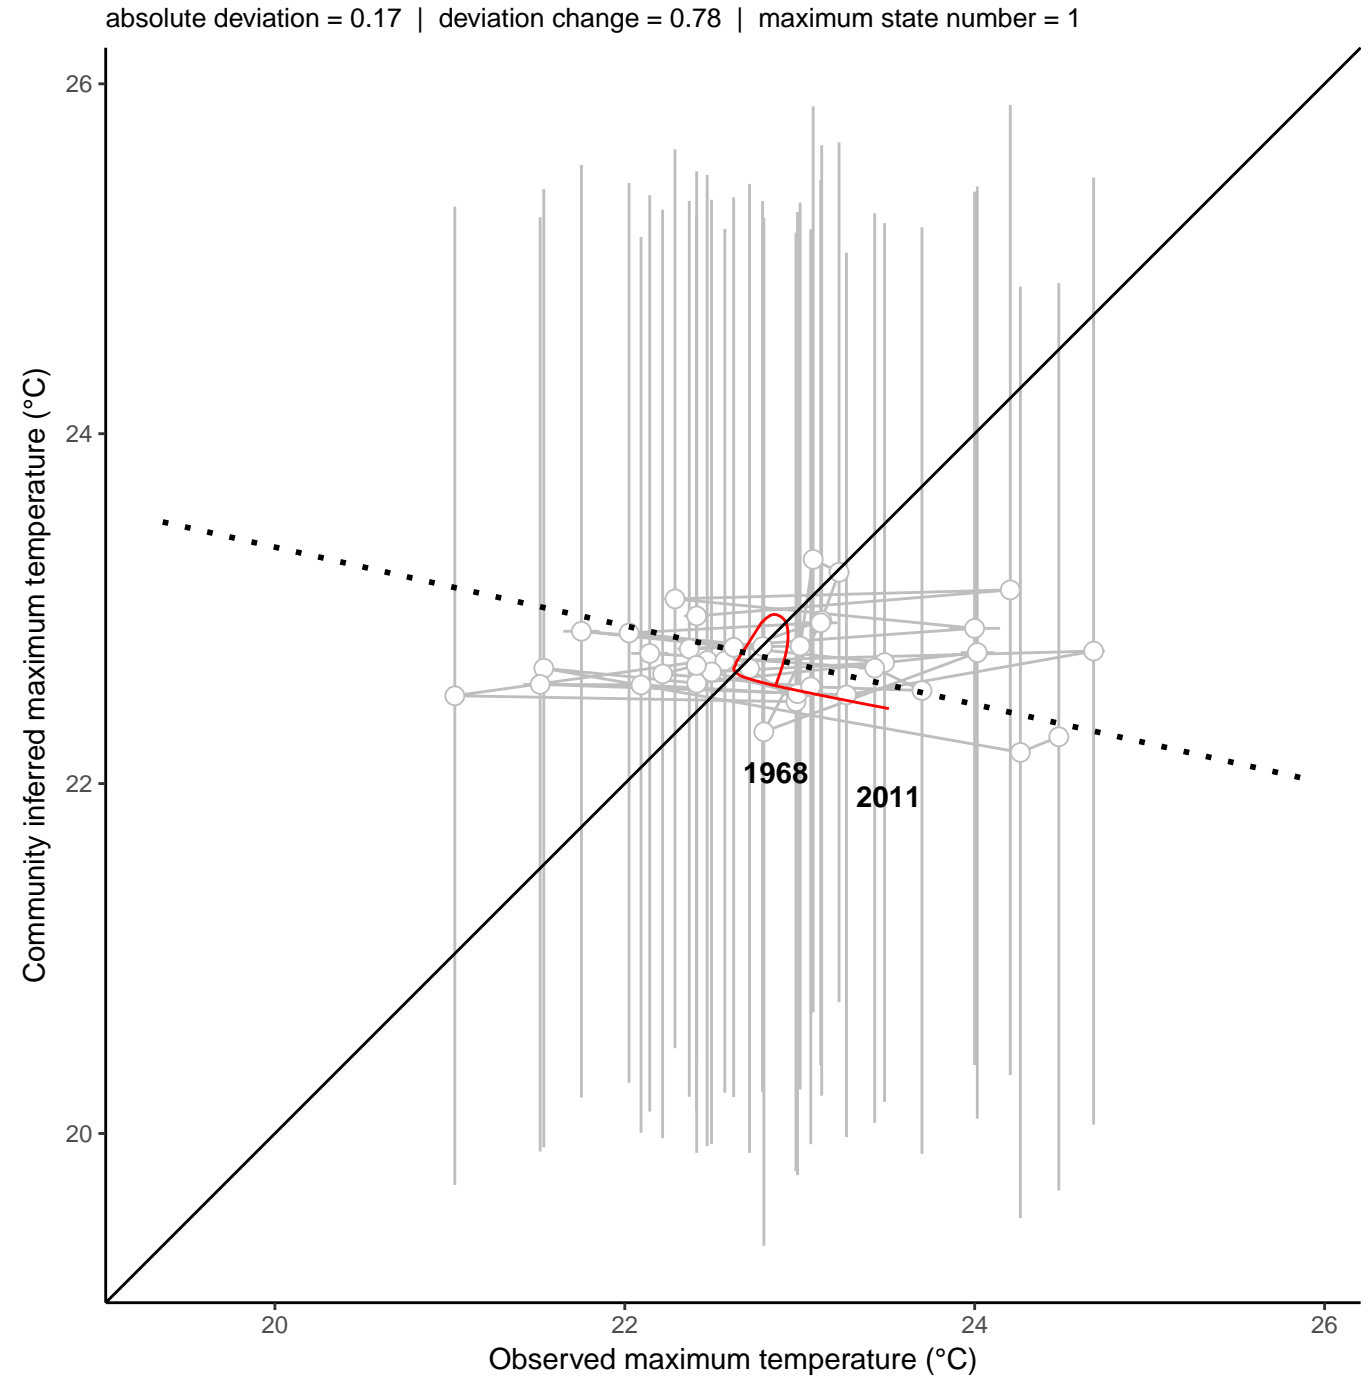

site : 840\_72\_69

absolute deviation = 1.61 | deviation change = 1.42 | maximum state number = 1

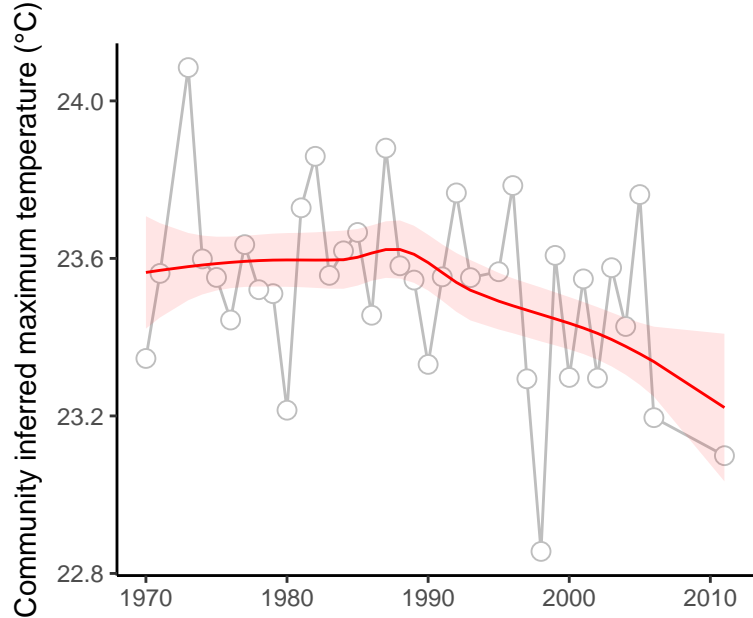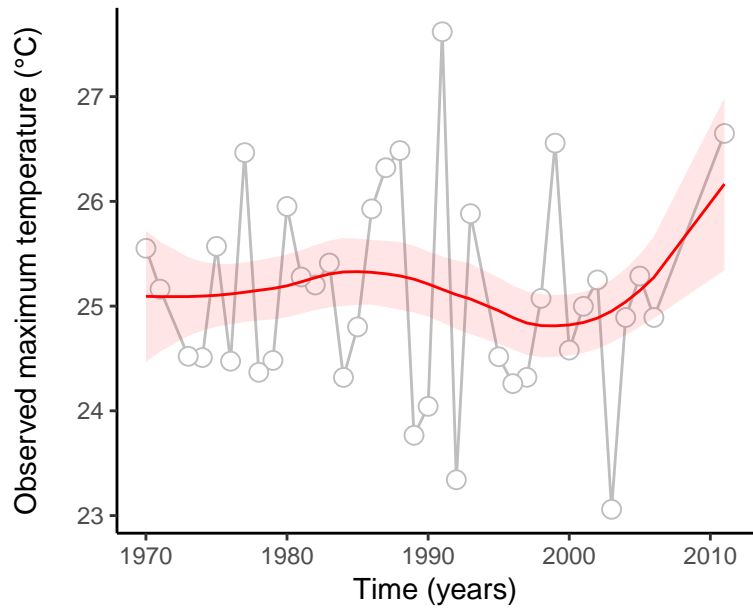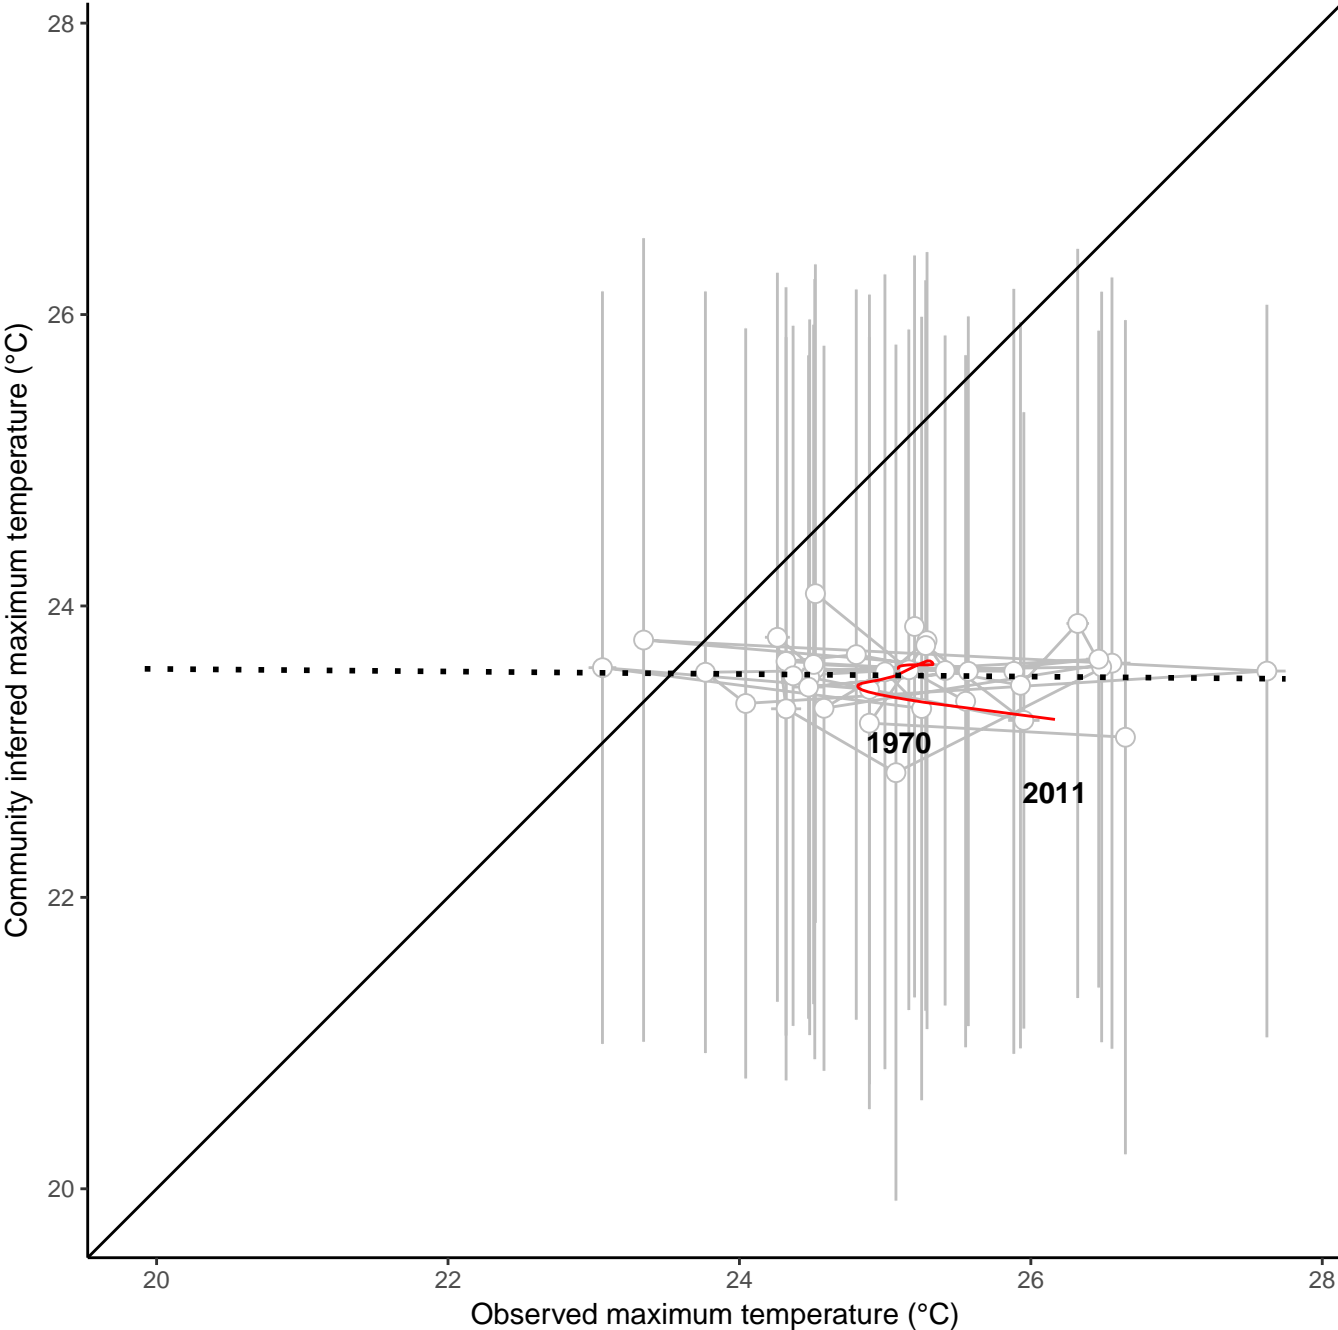

site : 840\_82\_24

absolute deviation = 3.26 | deviation change = 1.21 | maximum state number = 2

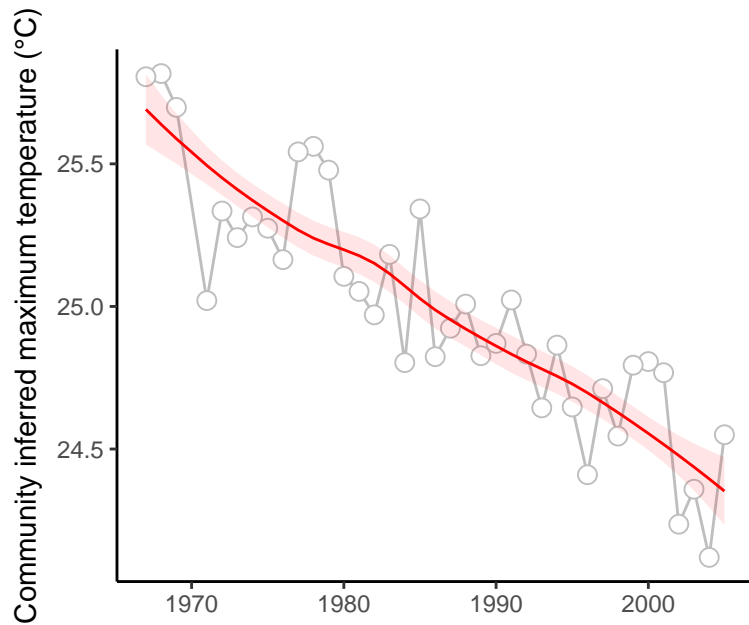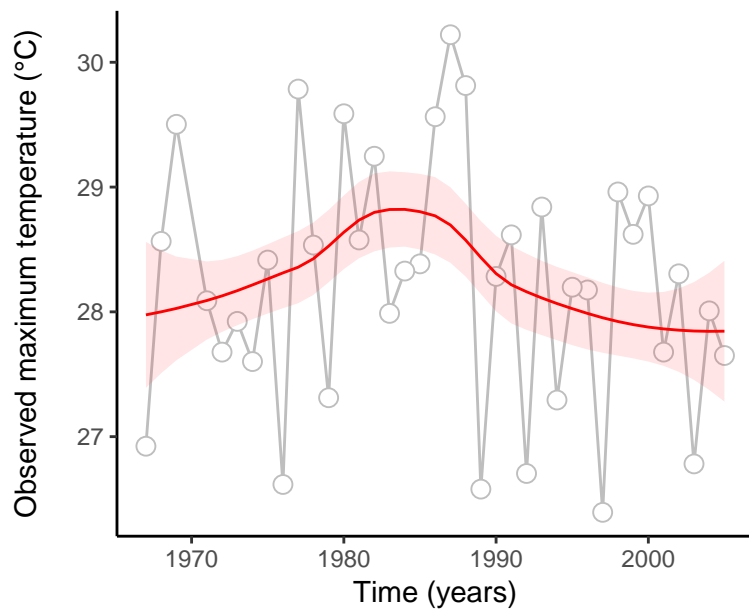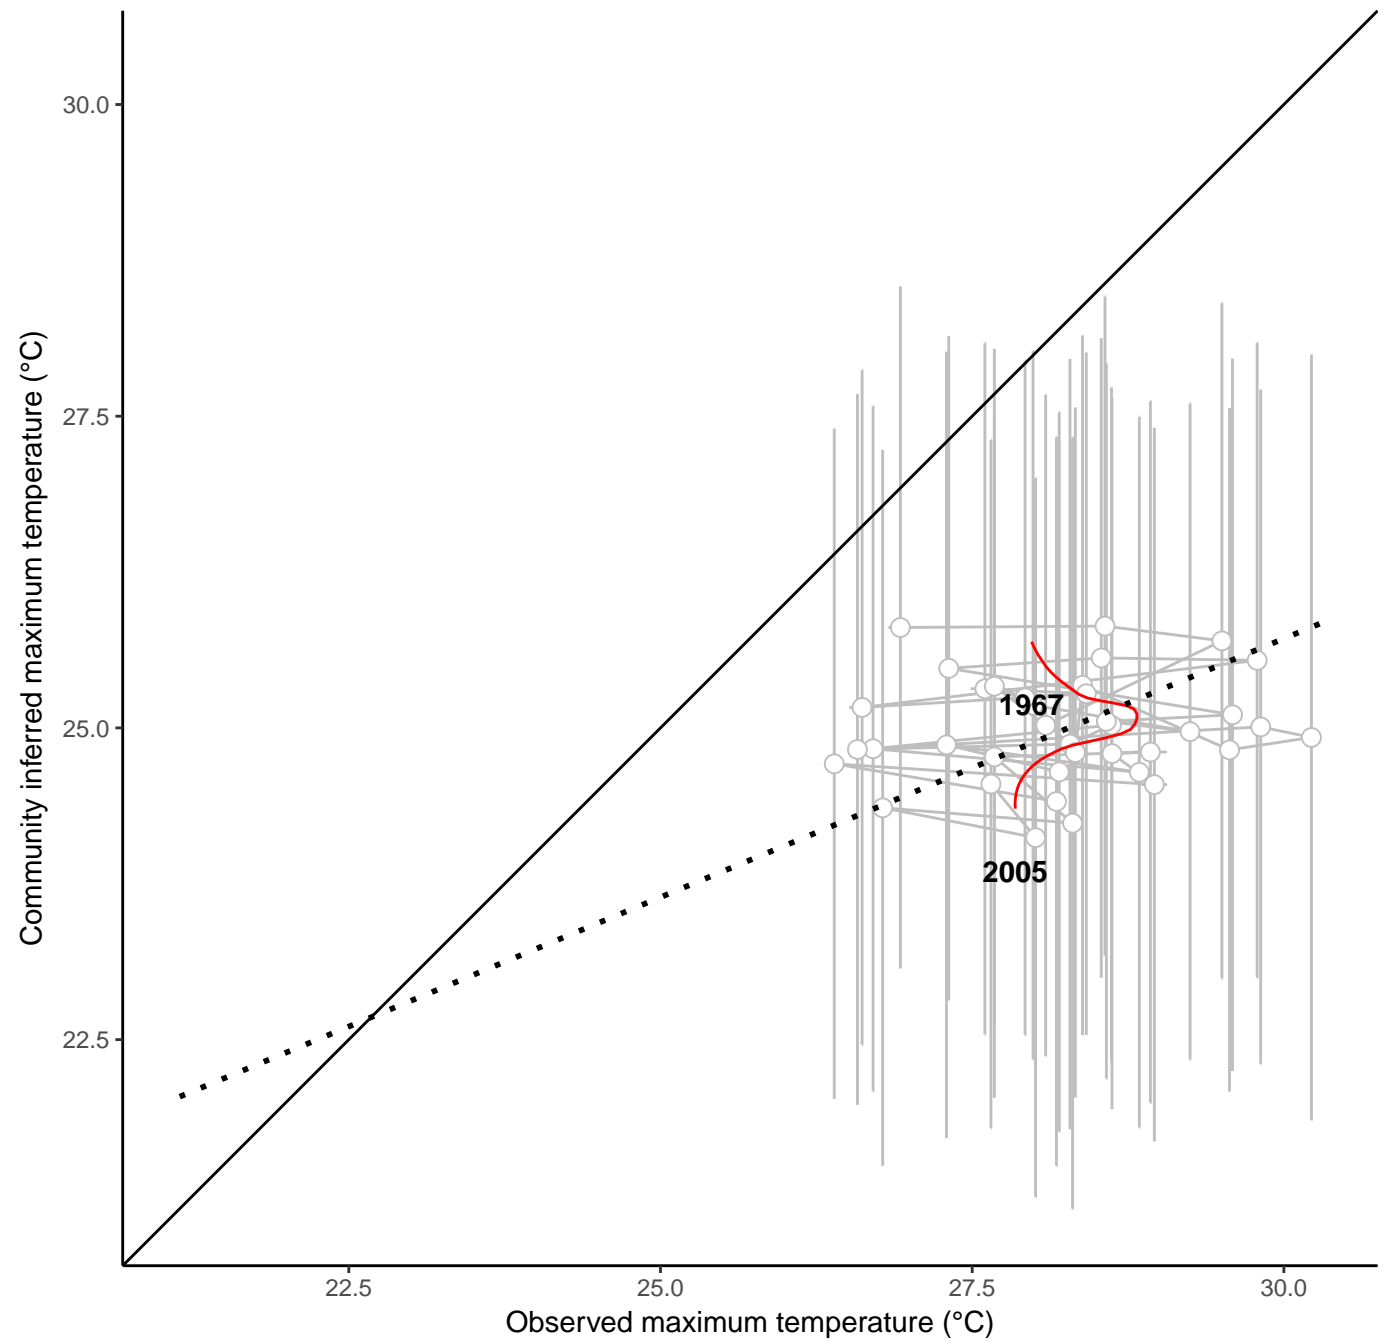

site : 840\_82\_31

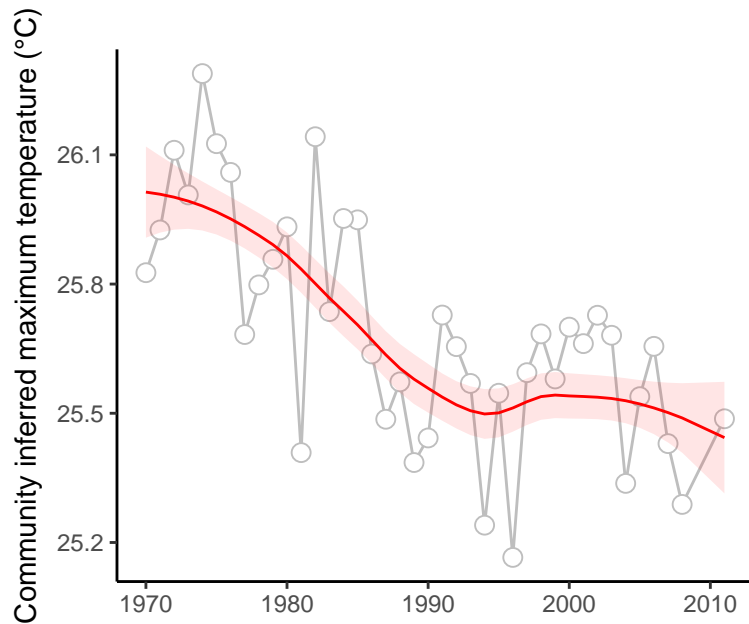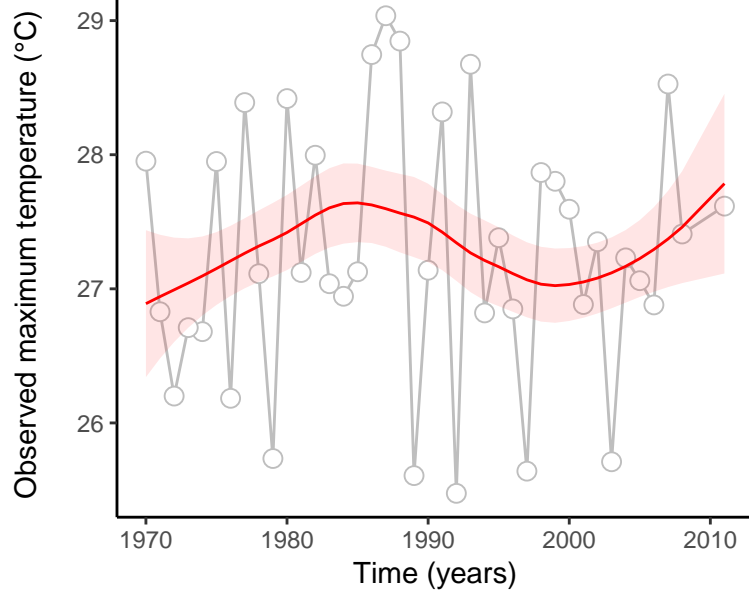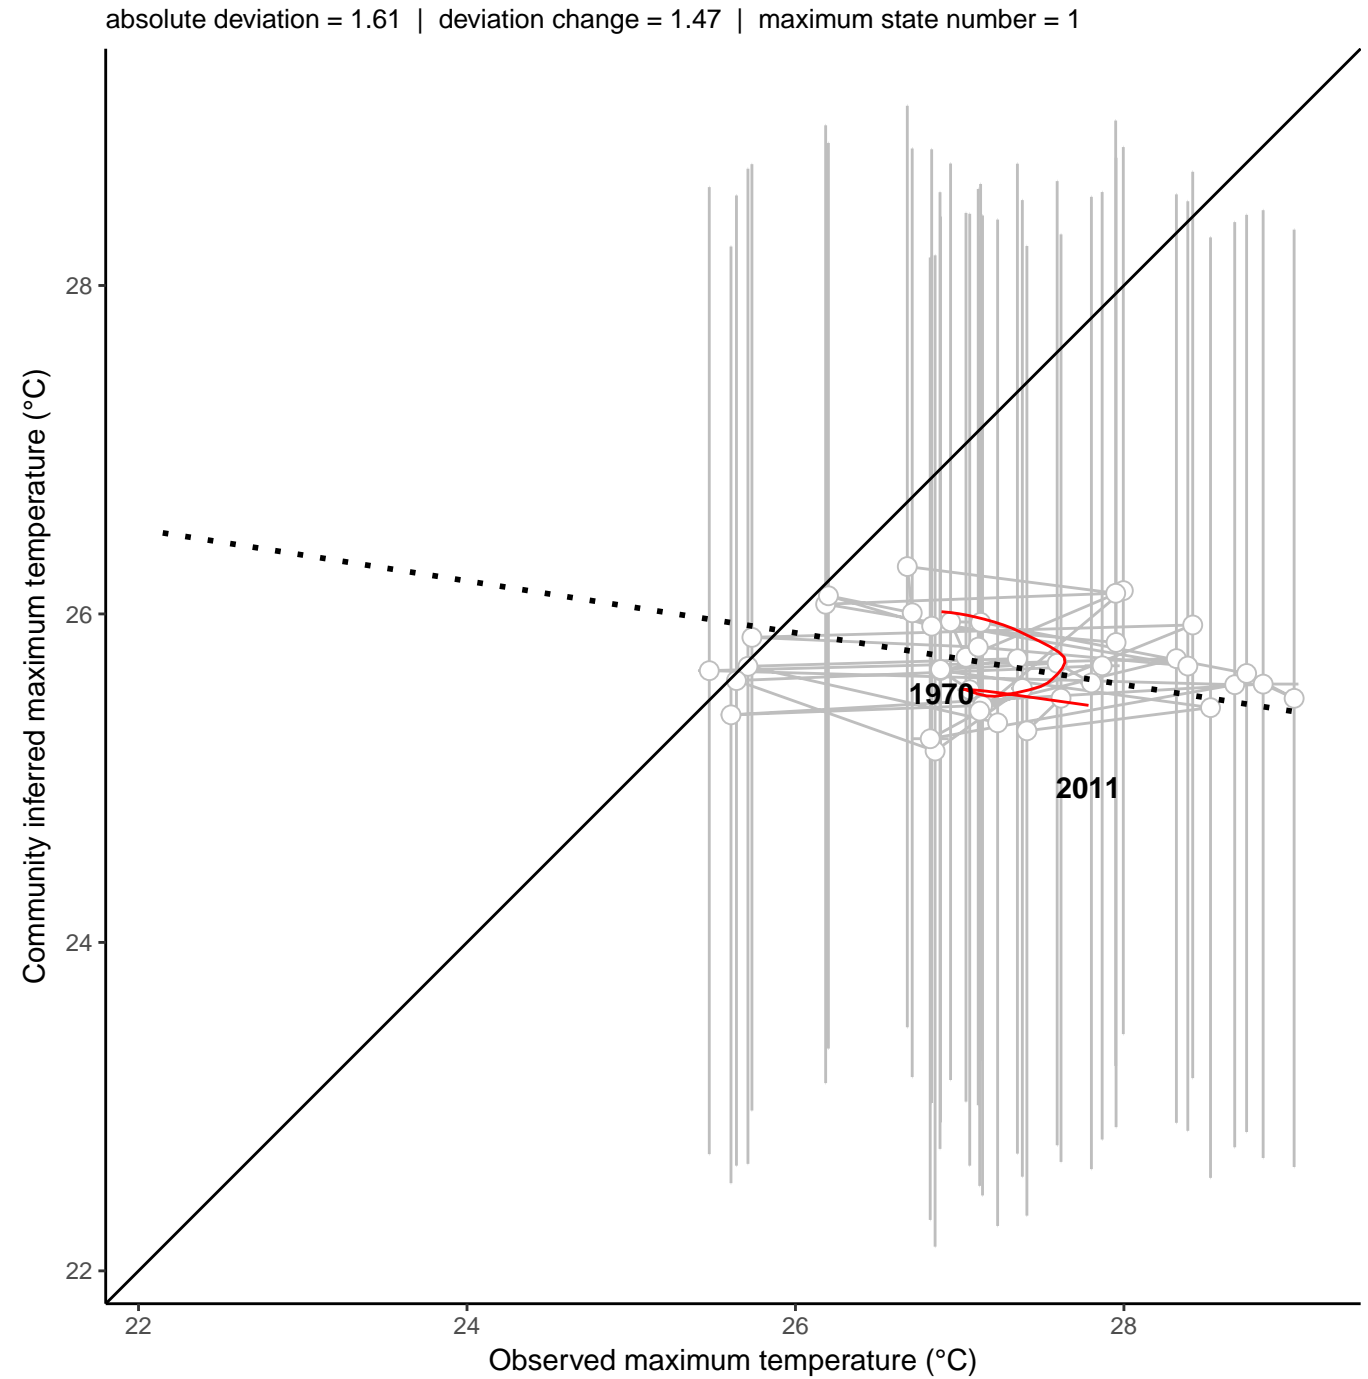



site : 840\_90\_19

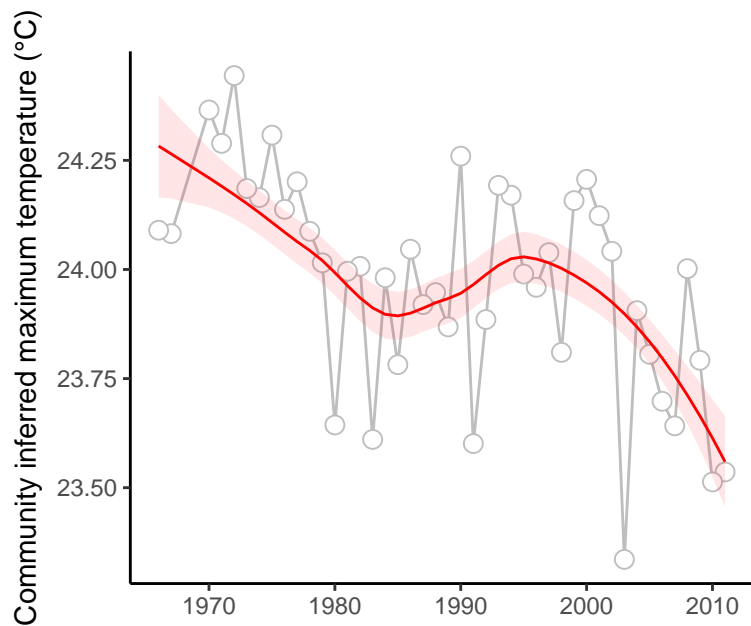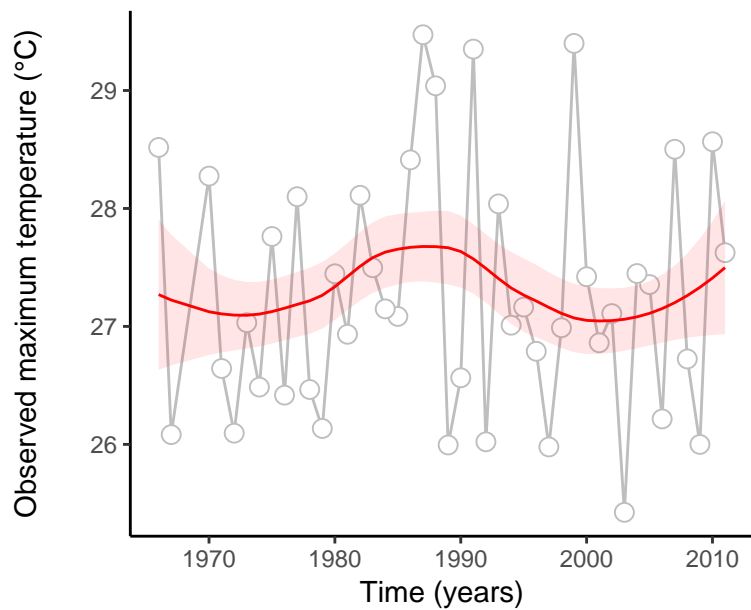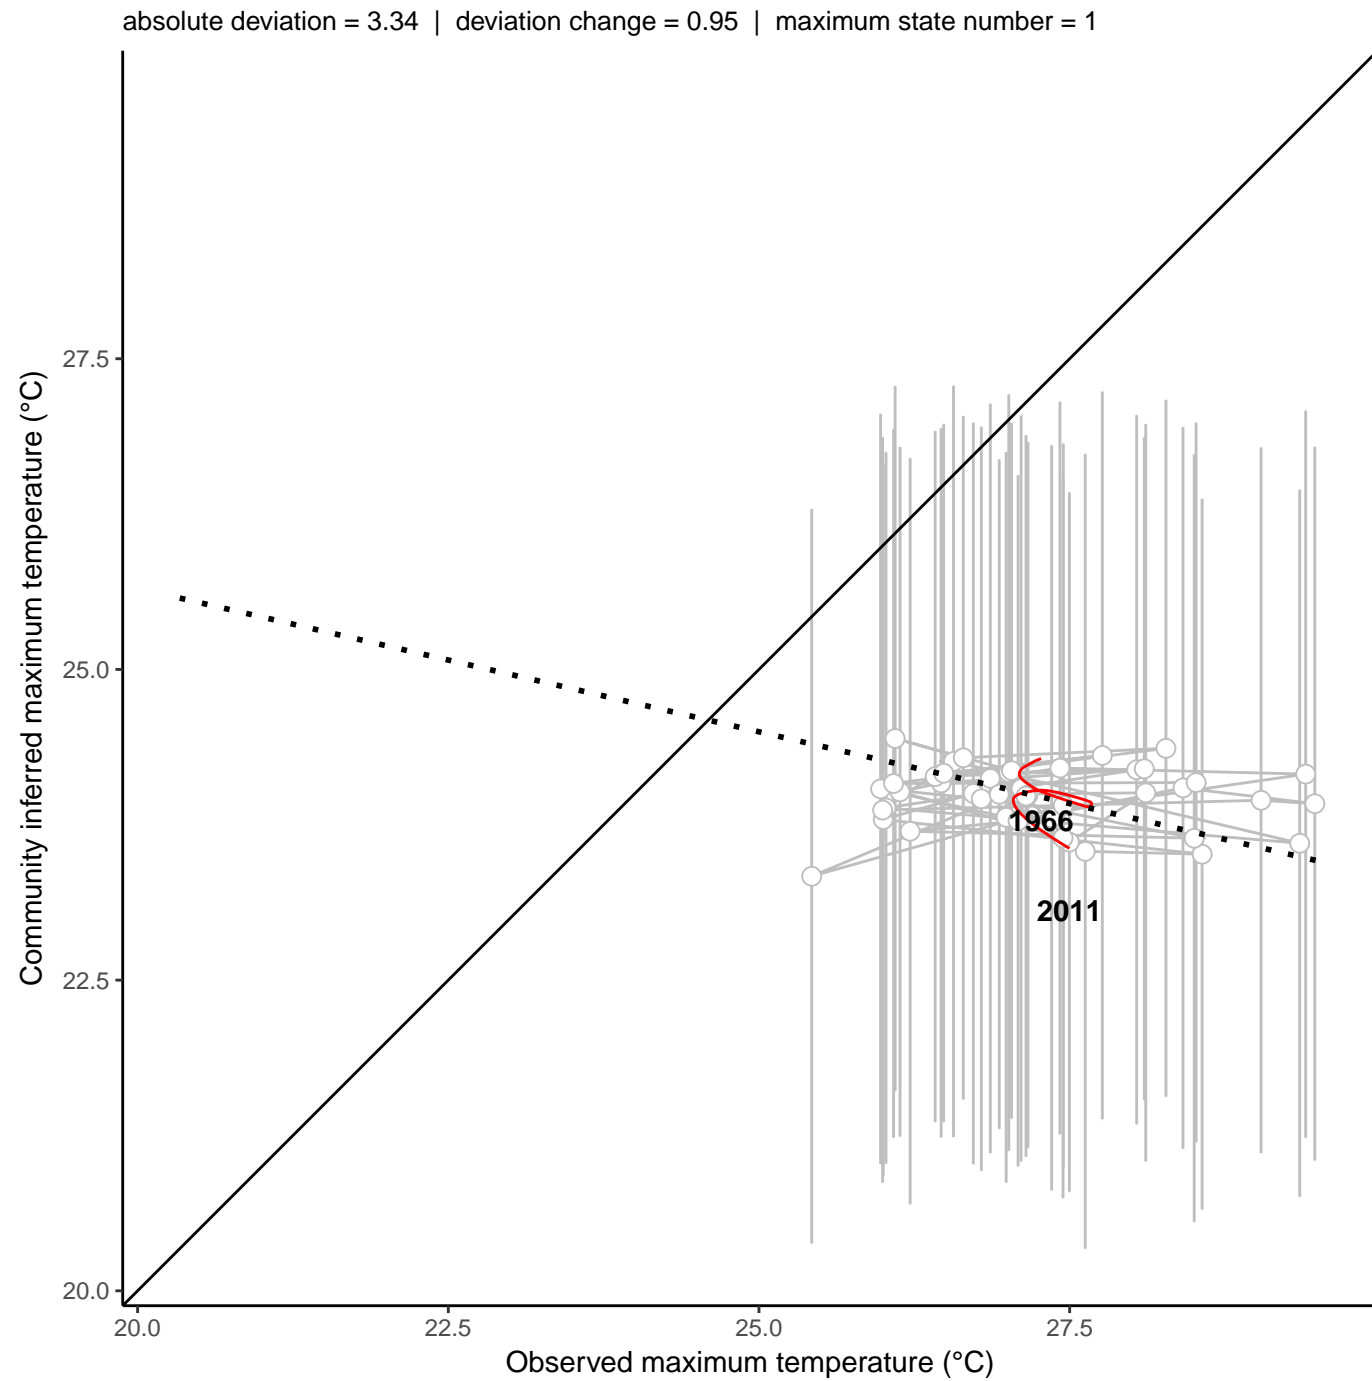

site : 840\_90\_46

absolute deviation = 0.38 | deviation change = 0.55 | maximum state number = 1

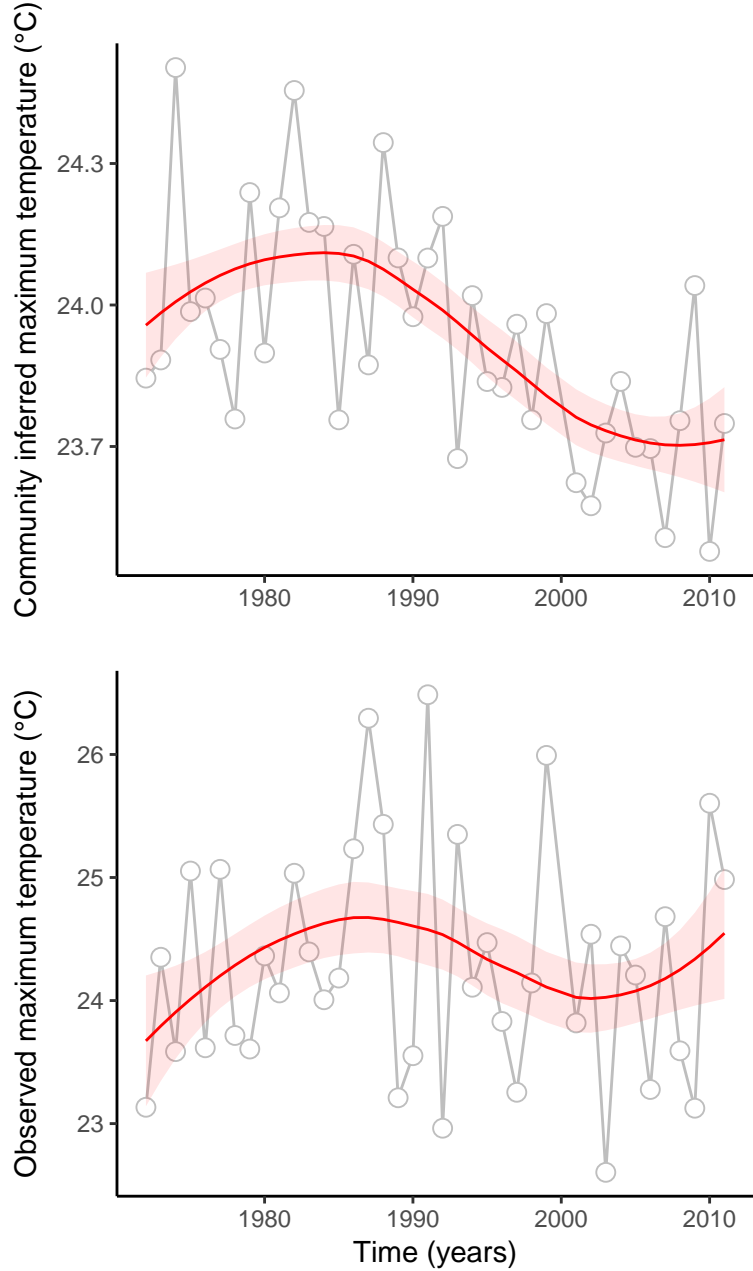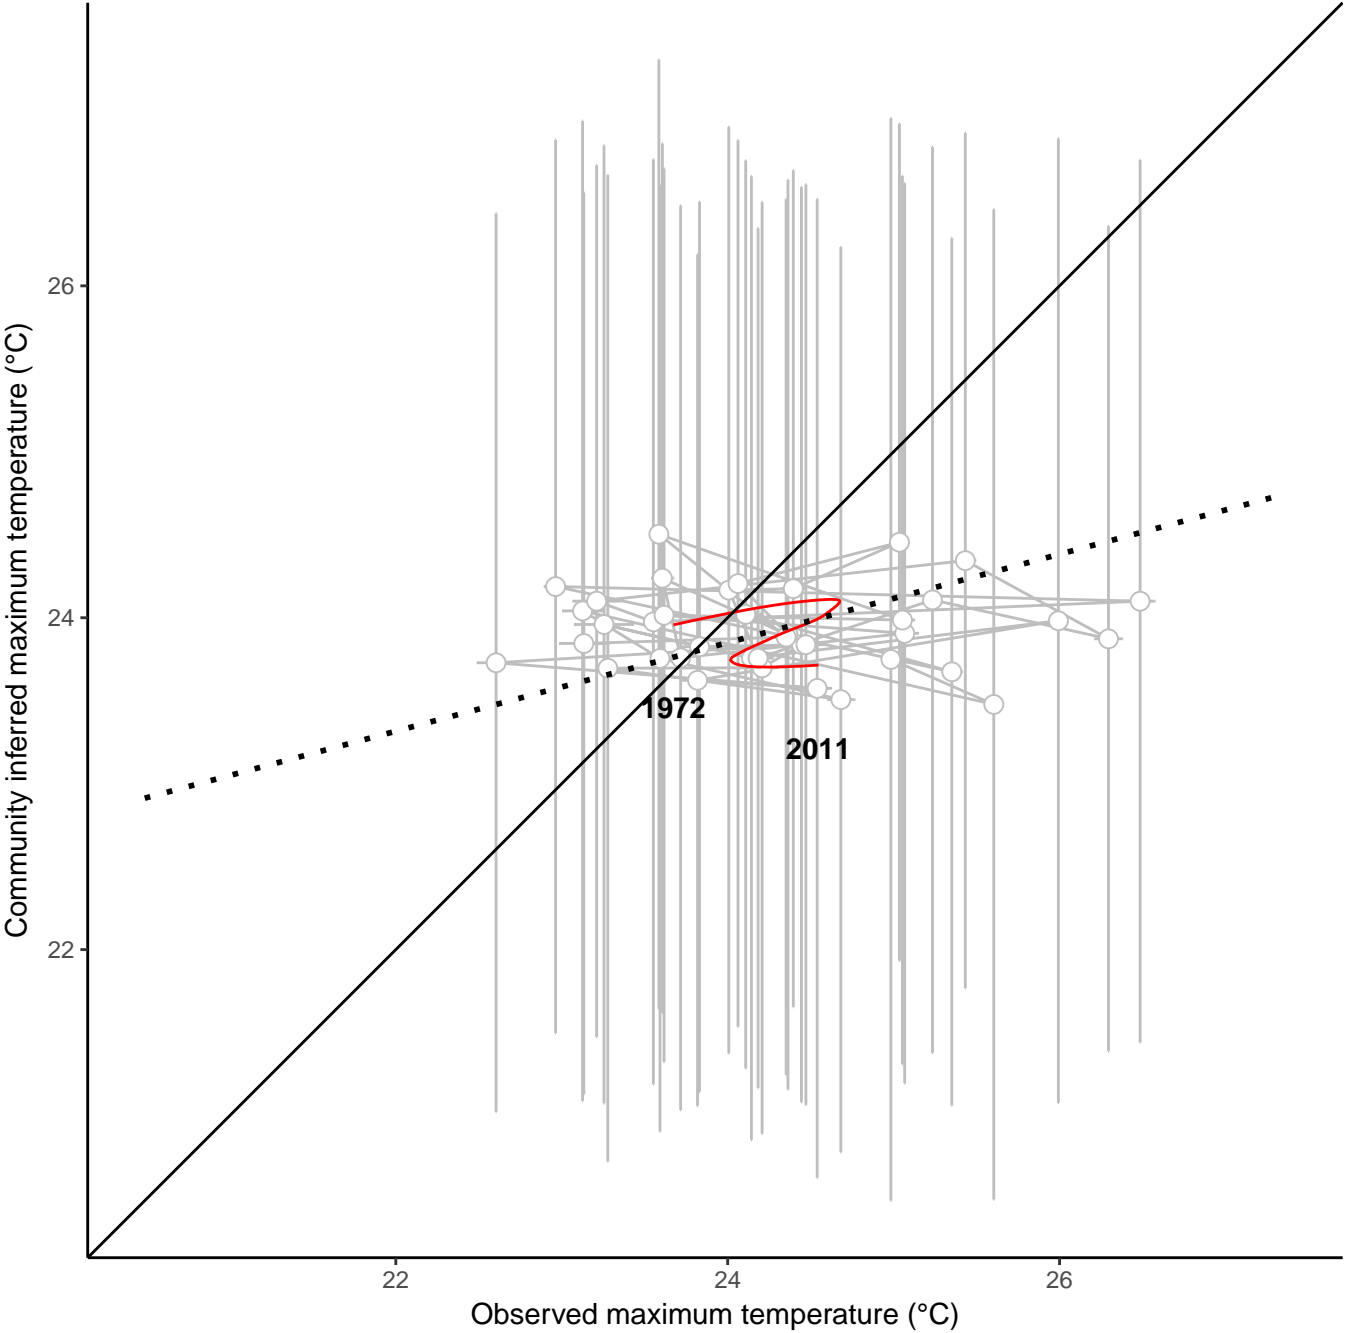

site : 840\_91\_22

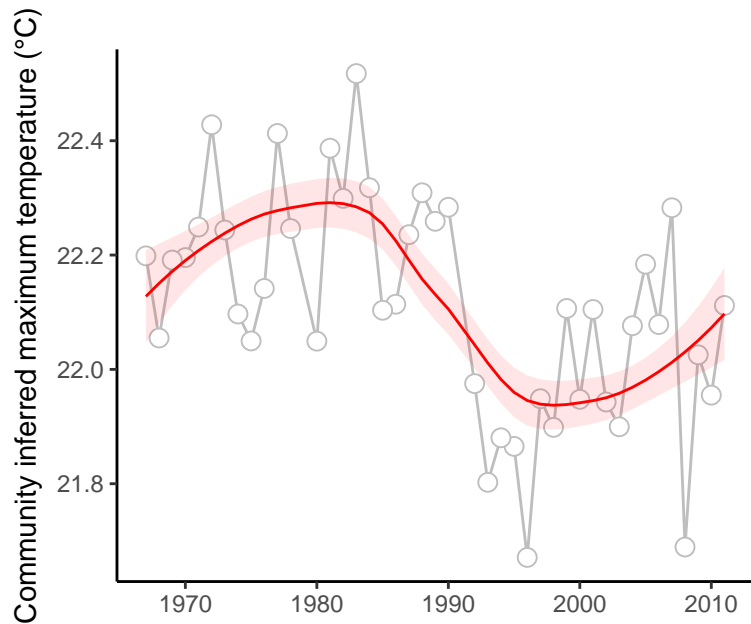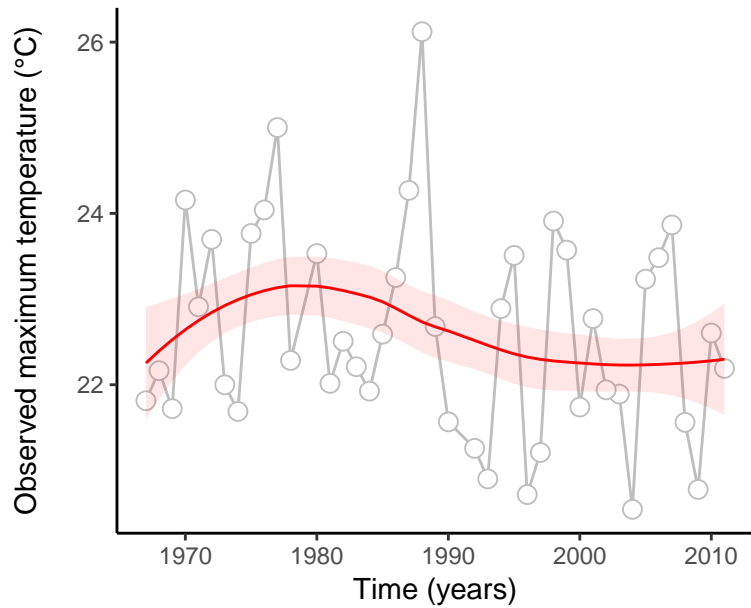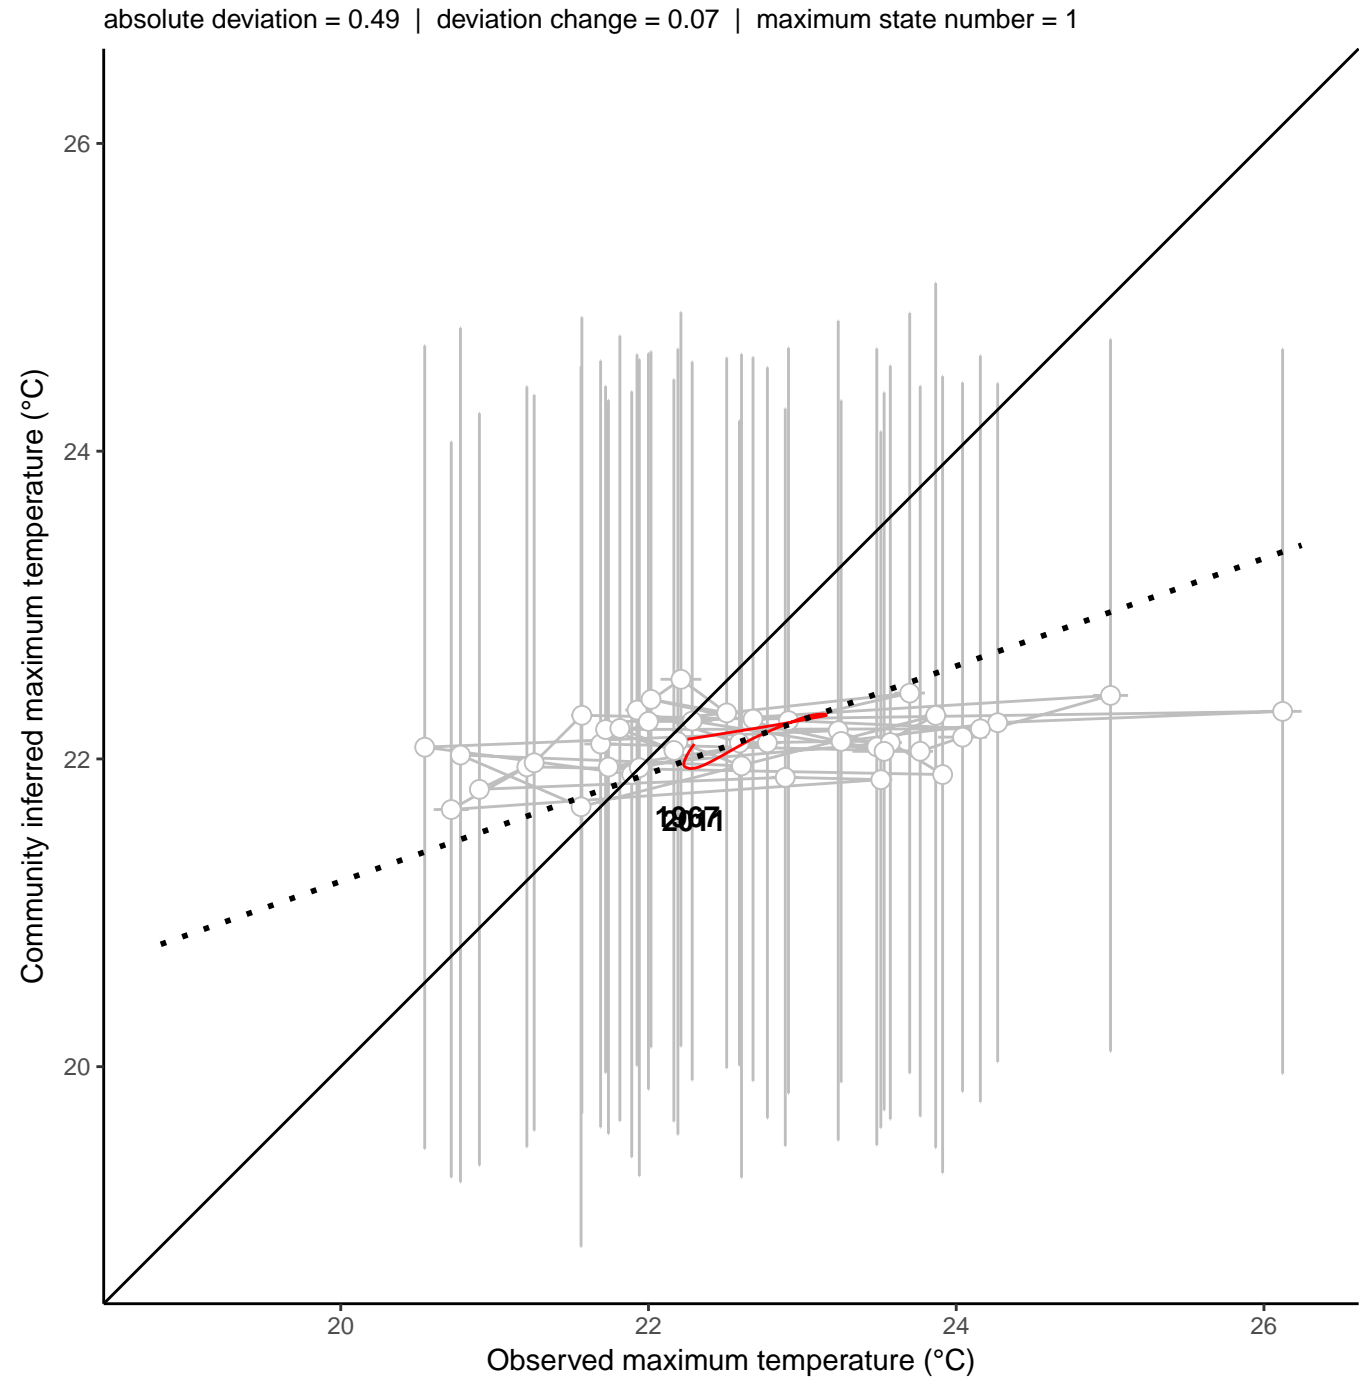

site : 840\_14\_75

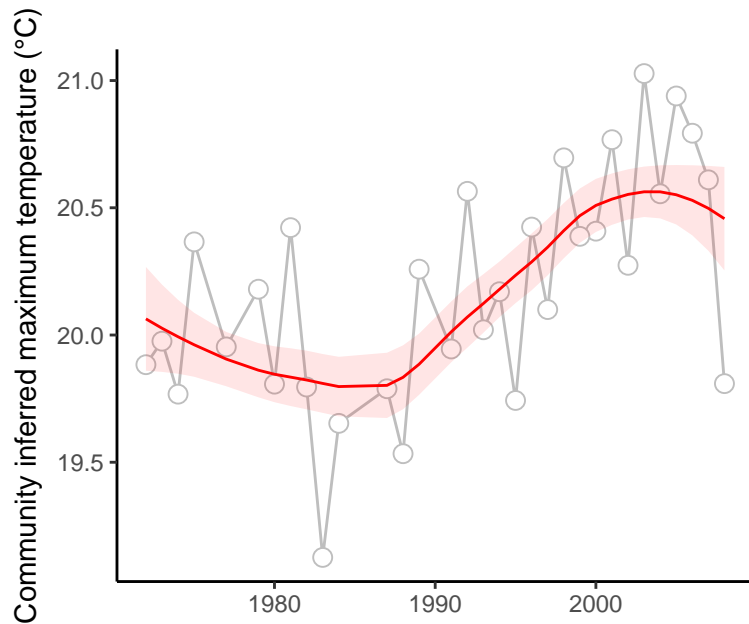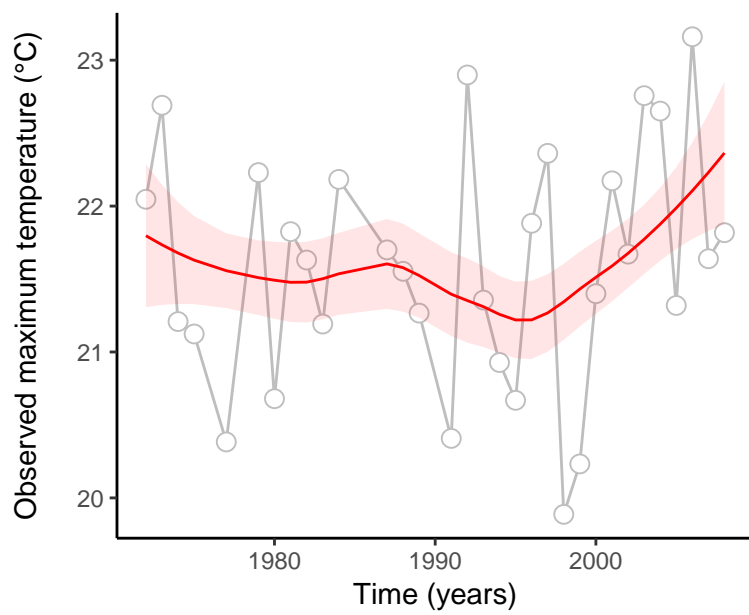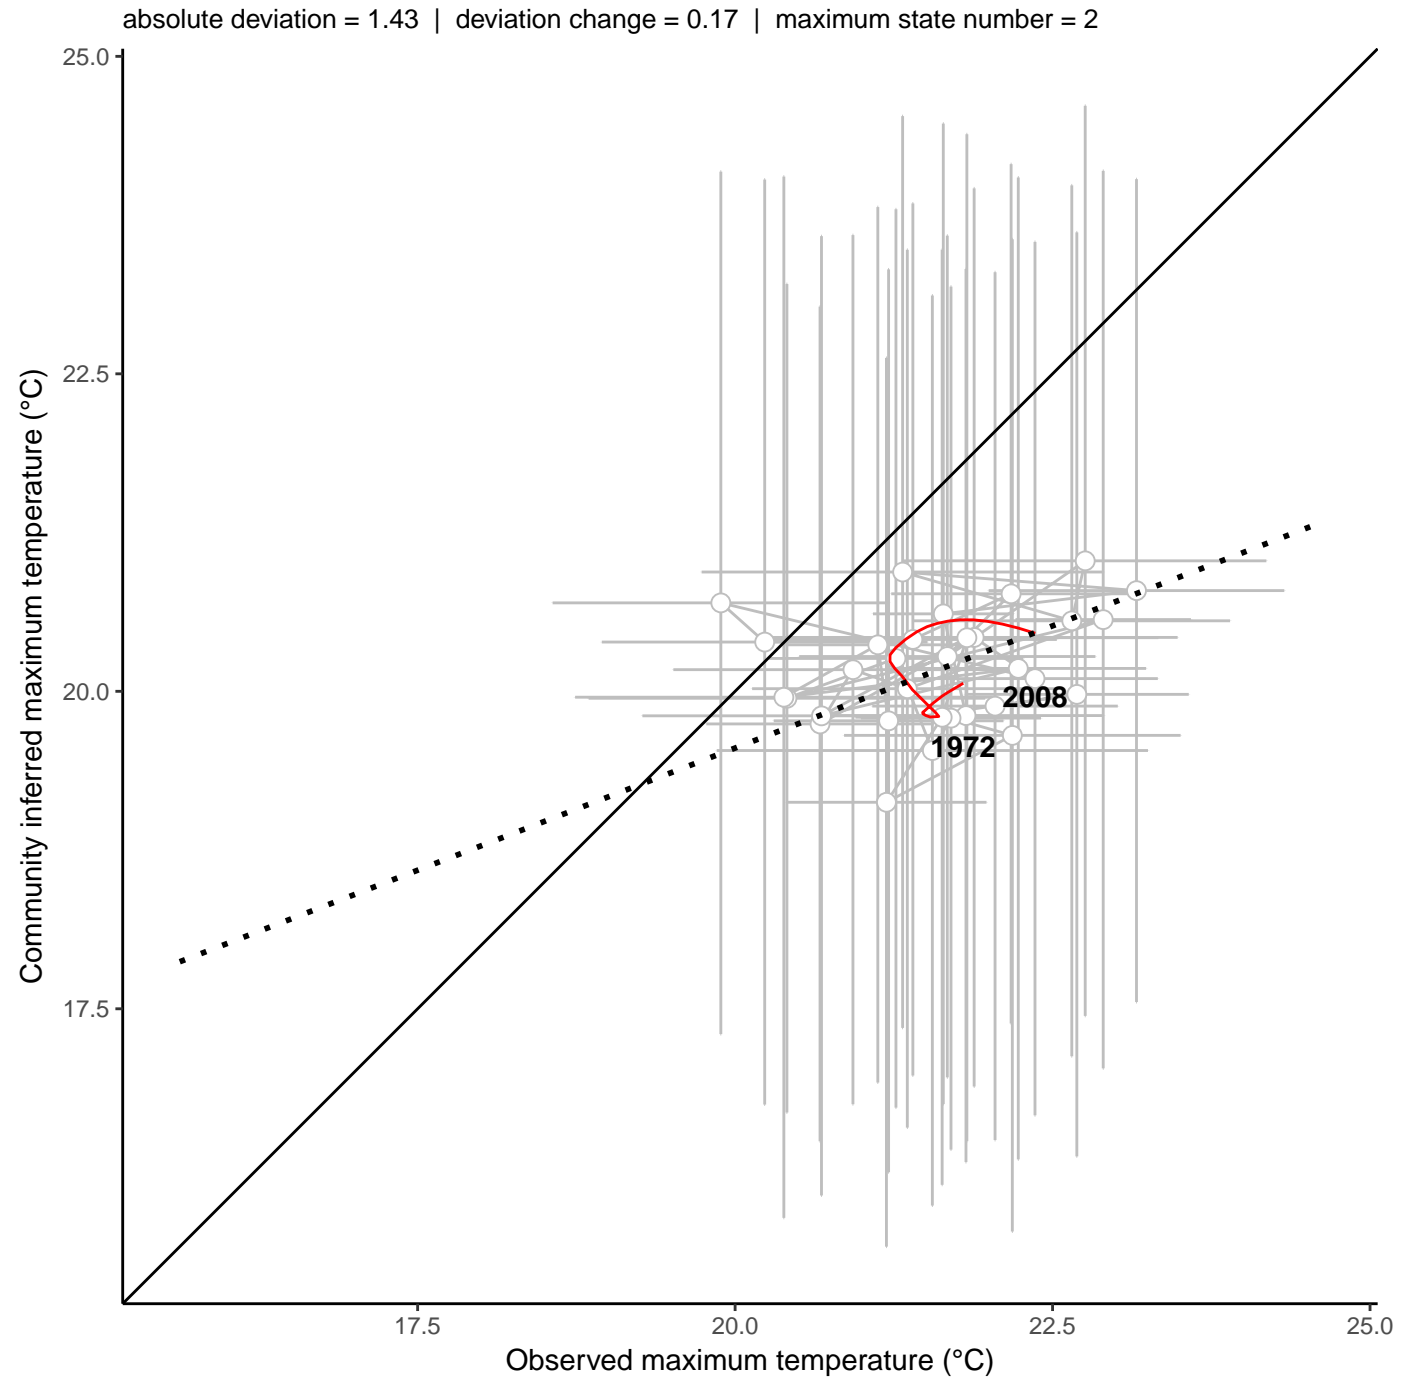

site : 840\_2\_1

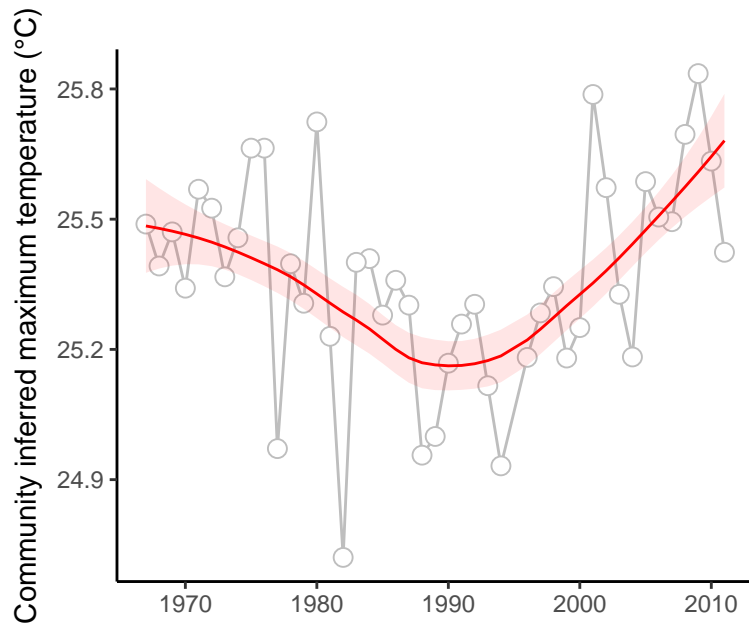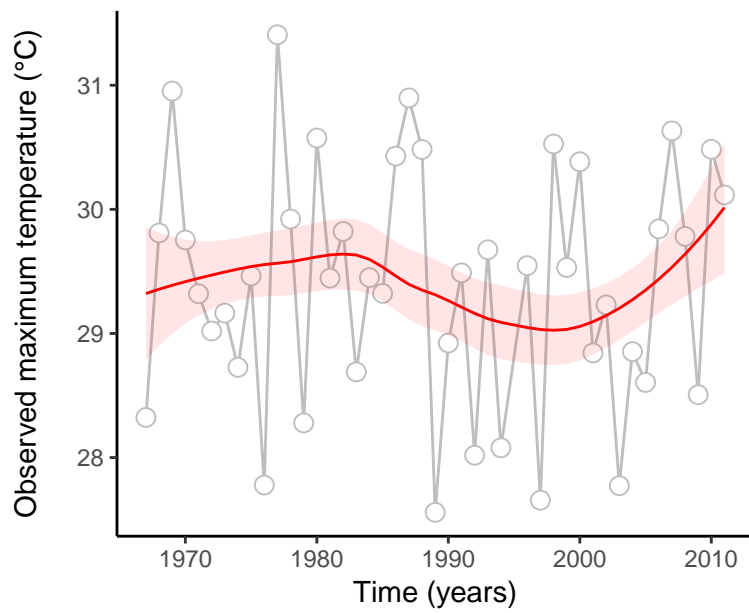

absolute deviation = 4.05 | deviation change = 0.5 | maximum state number = 1

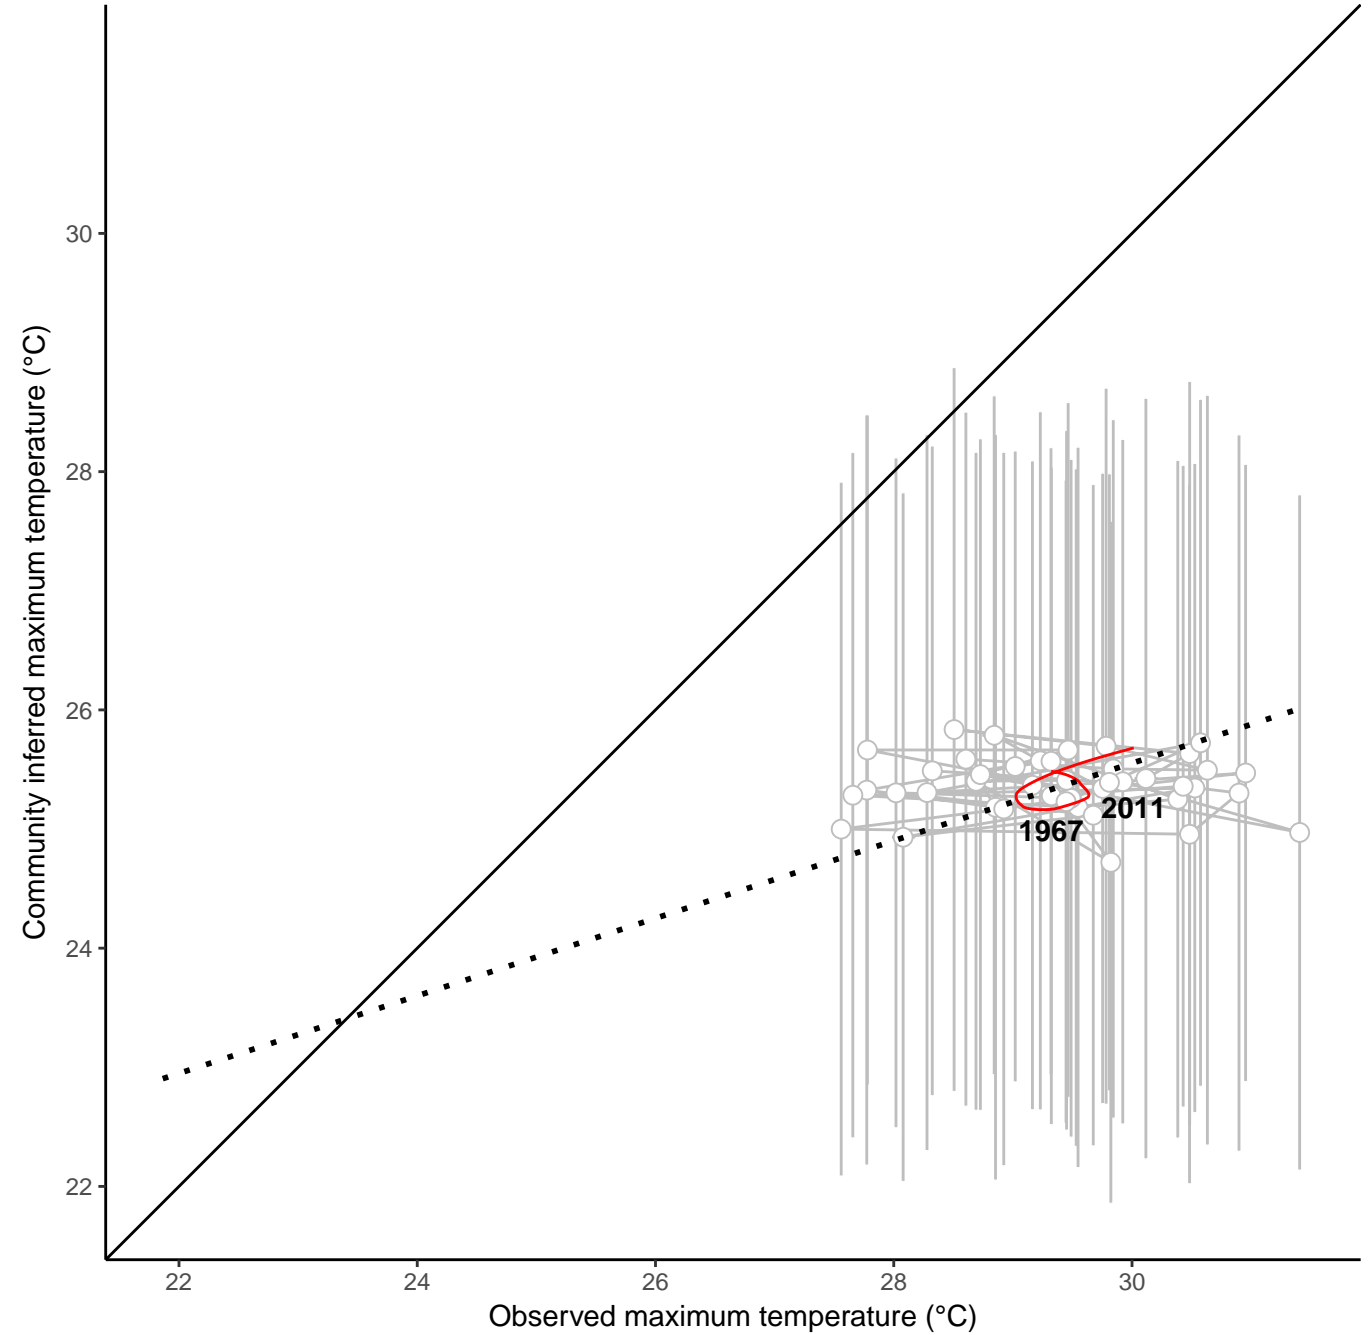

site : 840\_25\_27

absolute deviation = 5.69 | deviation change = -0.39 | maximum state number = 1

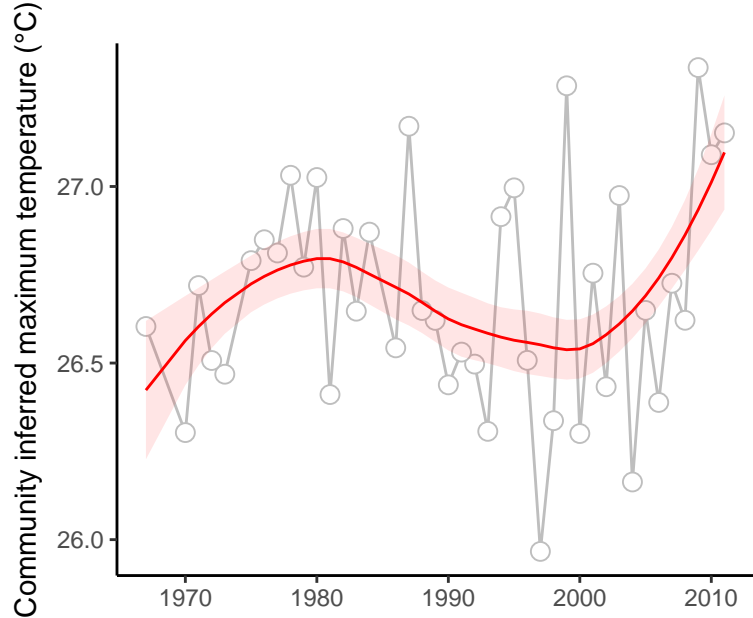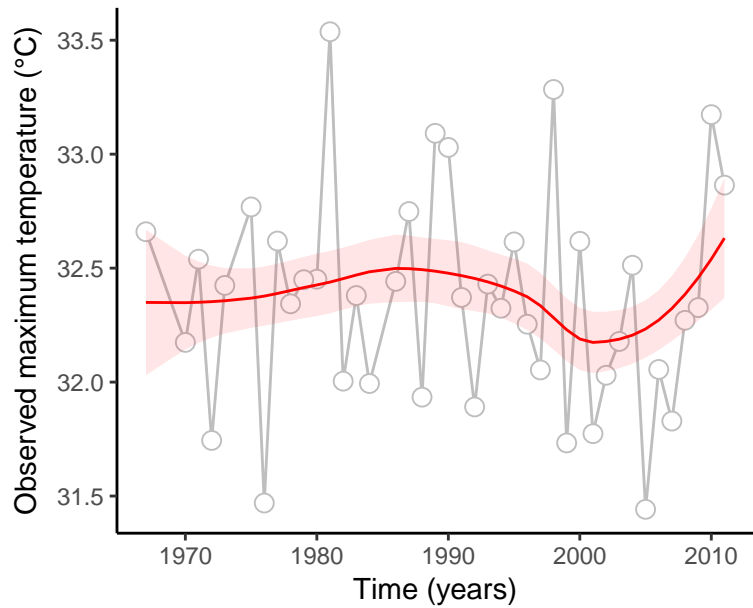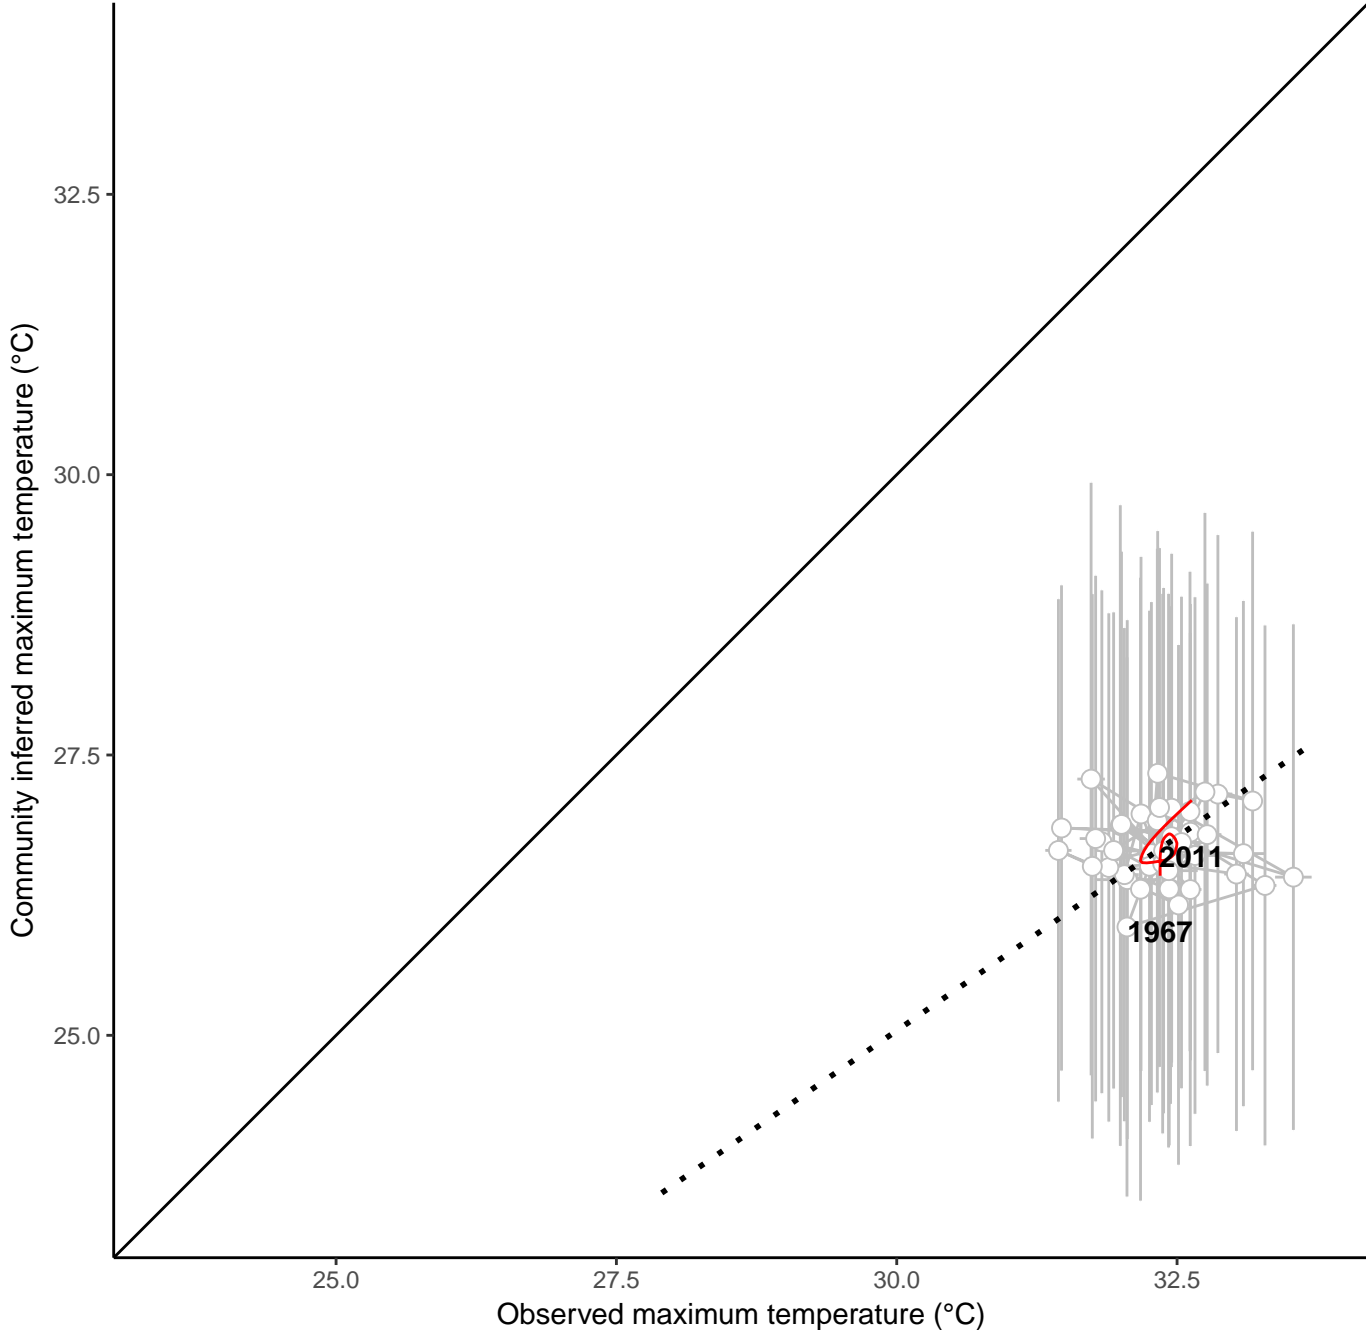

site : 840\_34\_38

absolute deviation = 3.15 | deviation change = 0.88 | maximum state number = 1

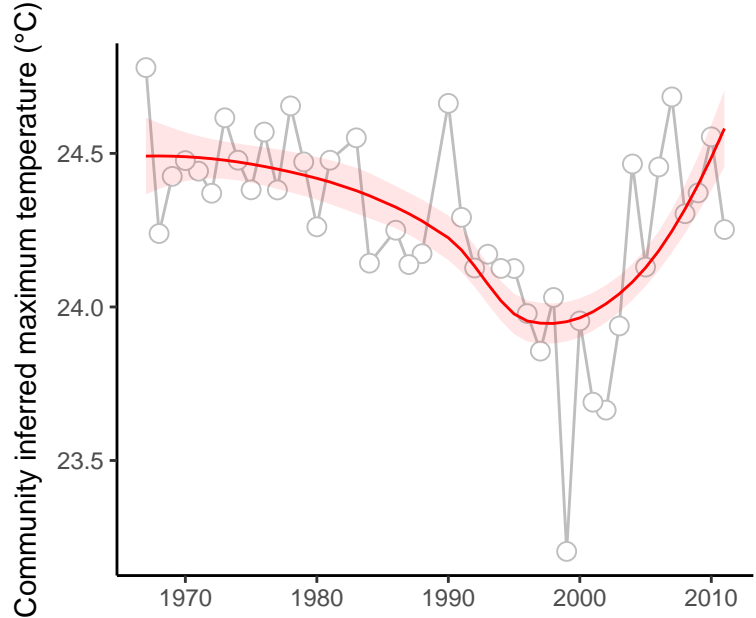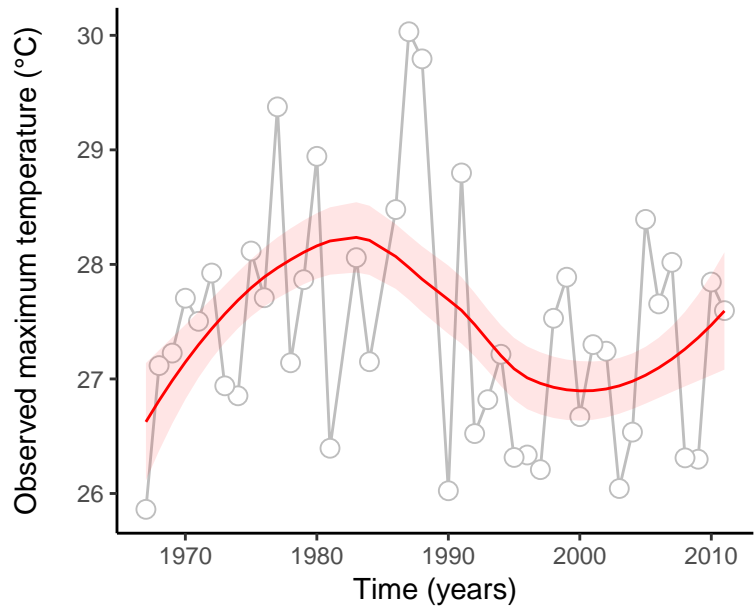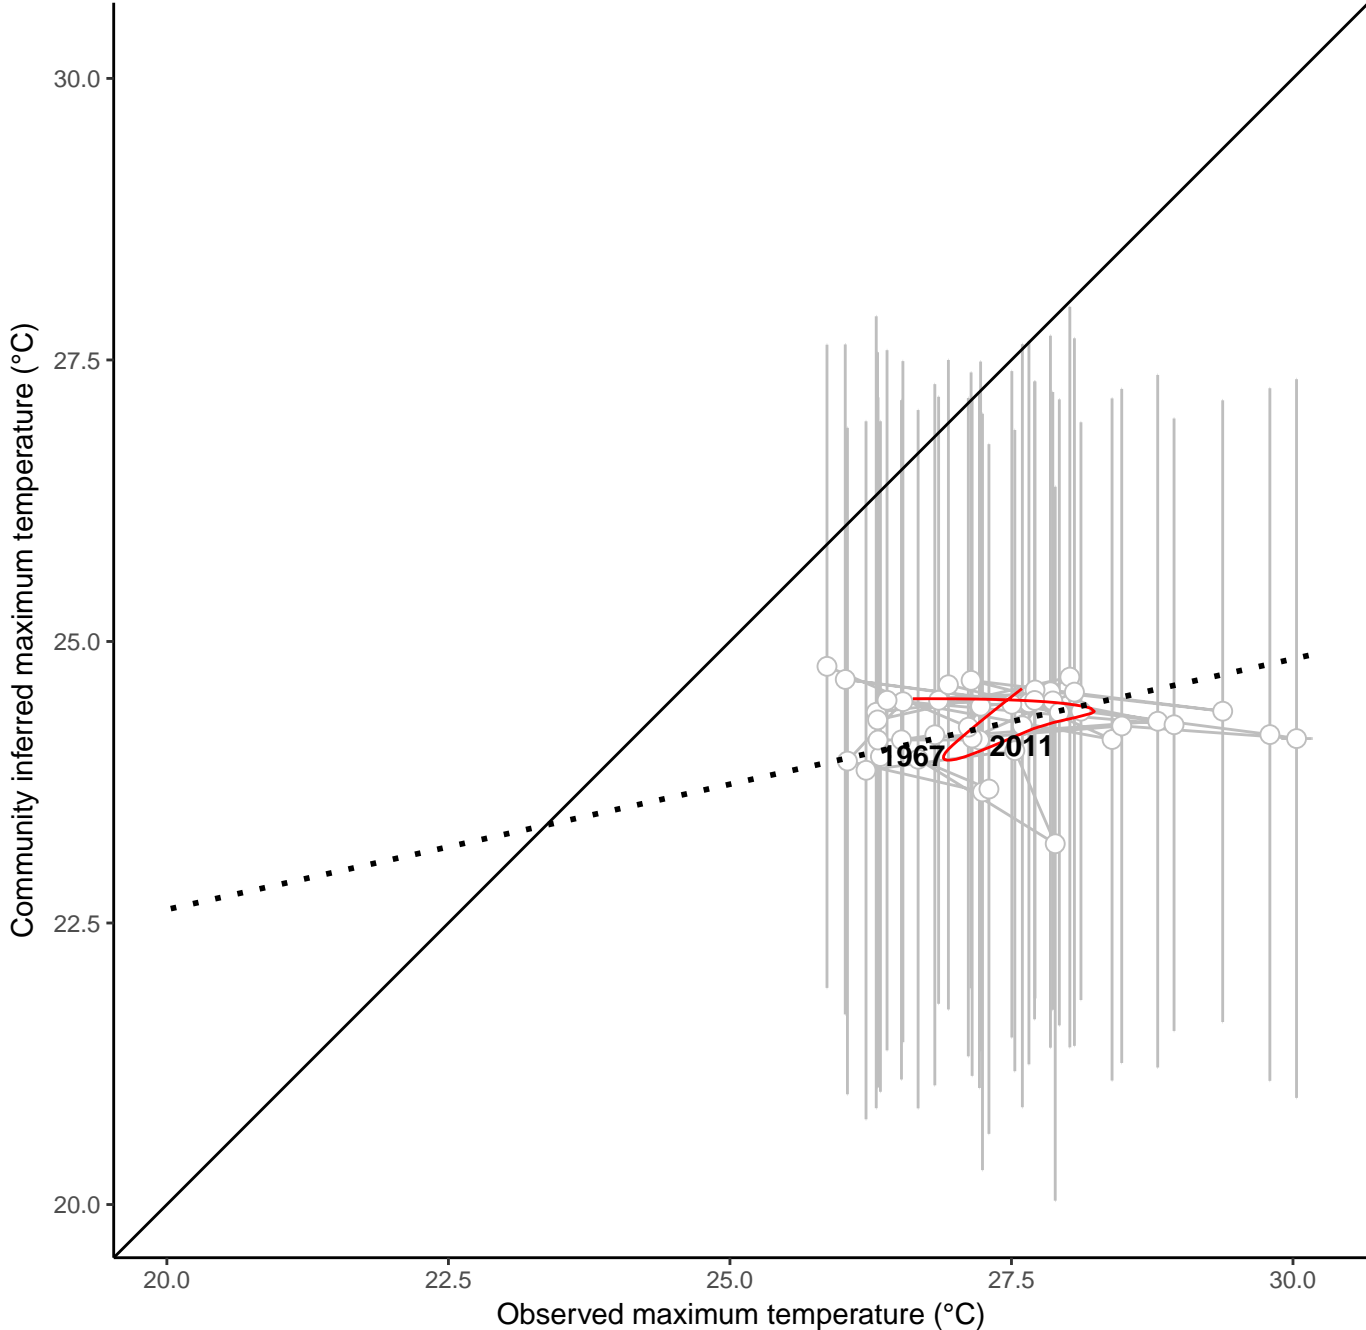

site : 840\_42\_17

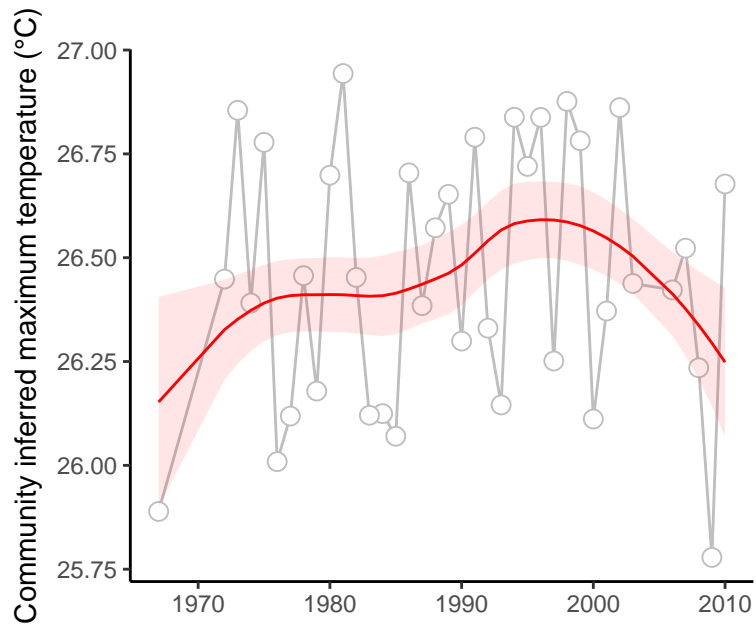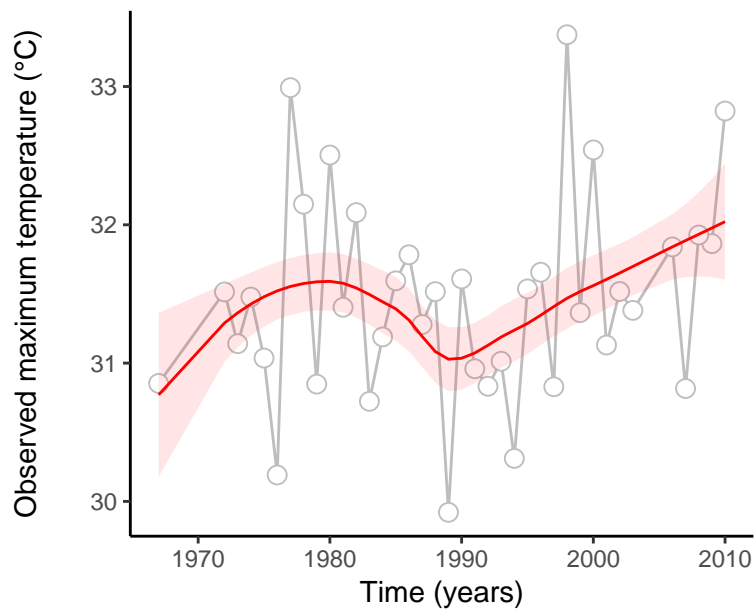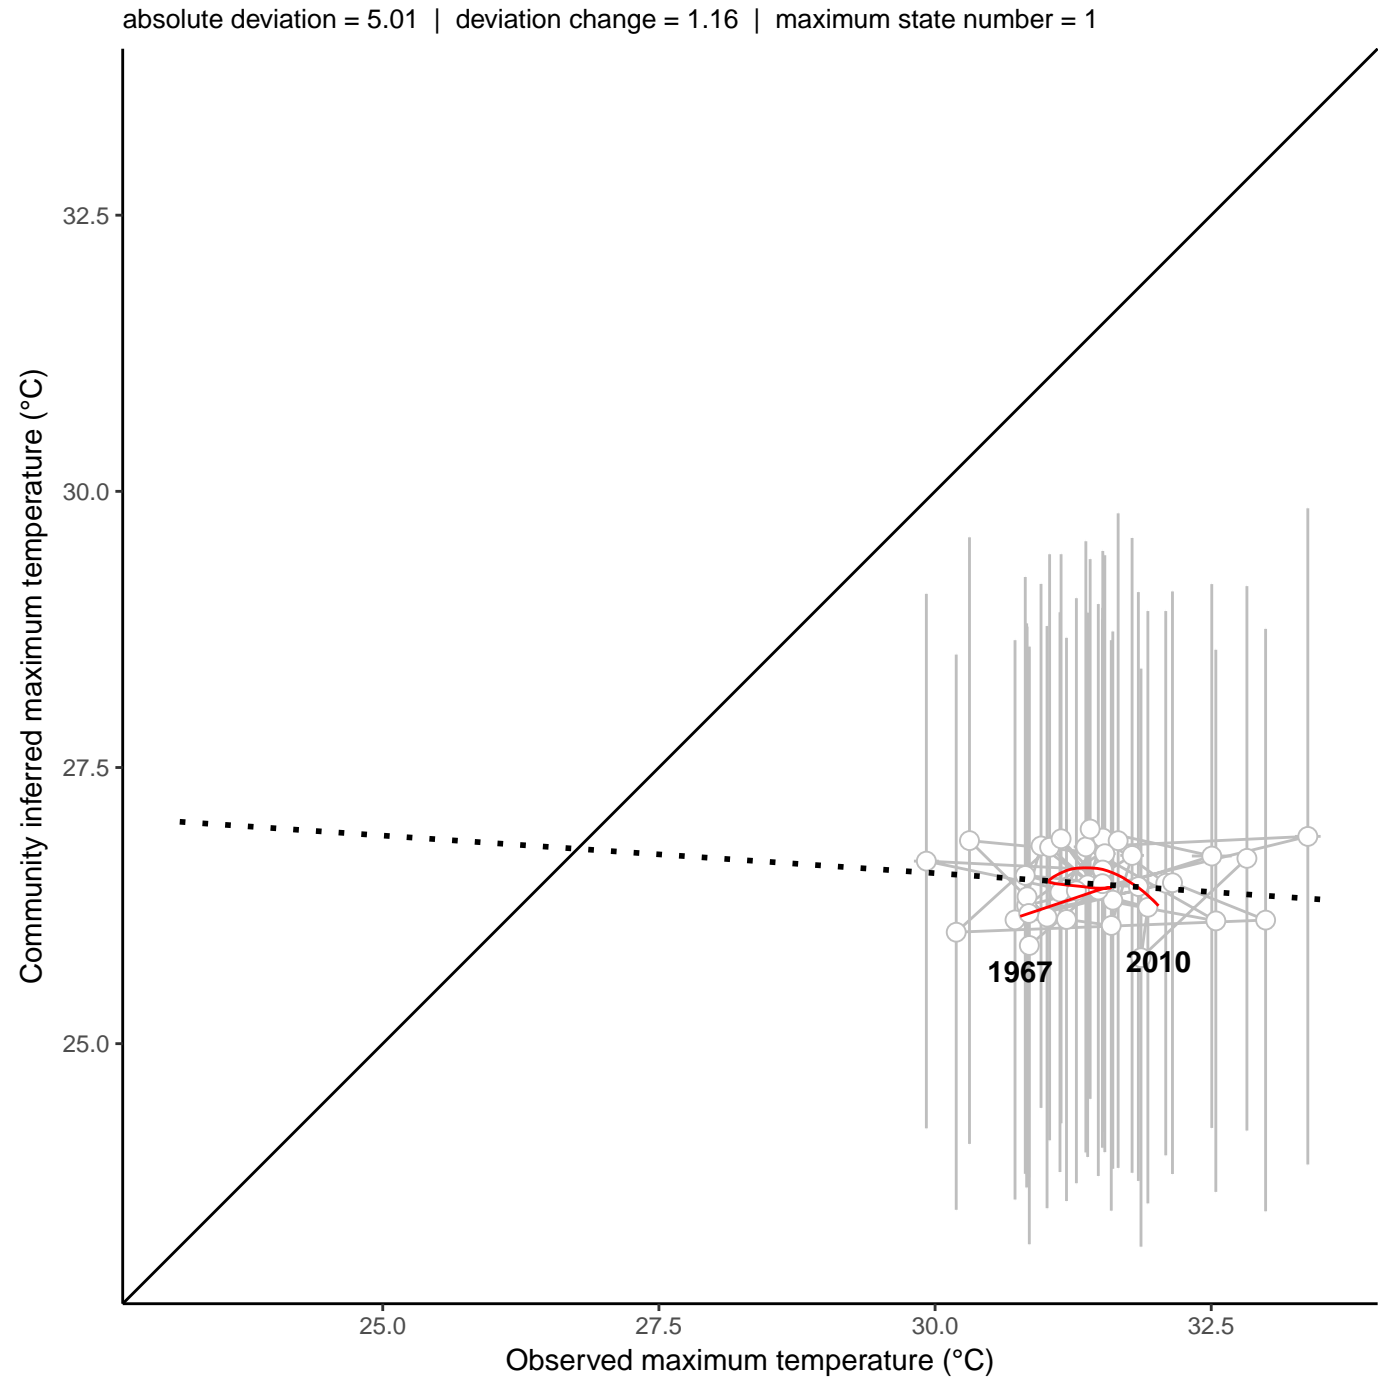



site : 840\_50\_16

absolute deviation = 1.87 | deviation change = 1.34 | maximum state number = 1

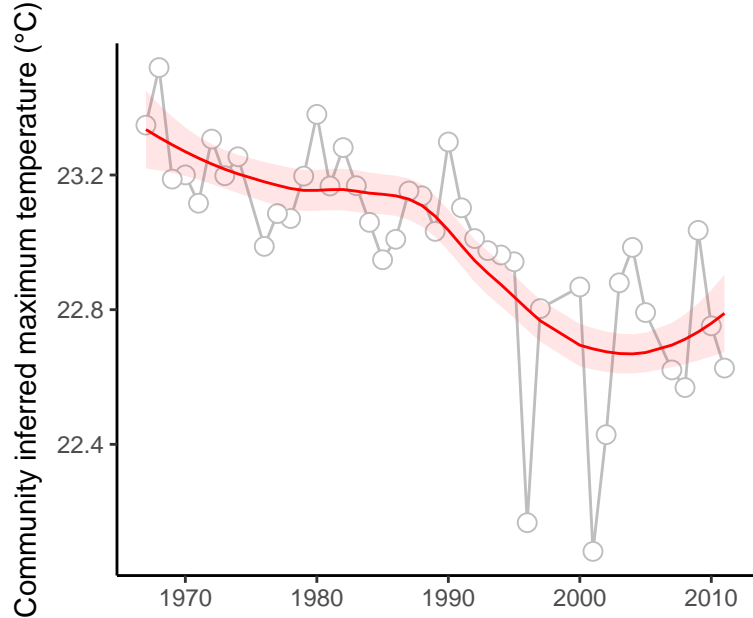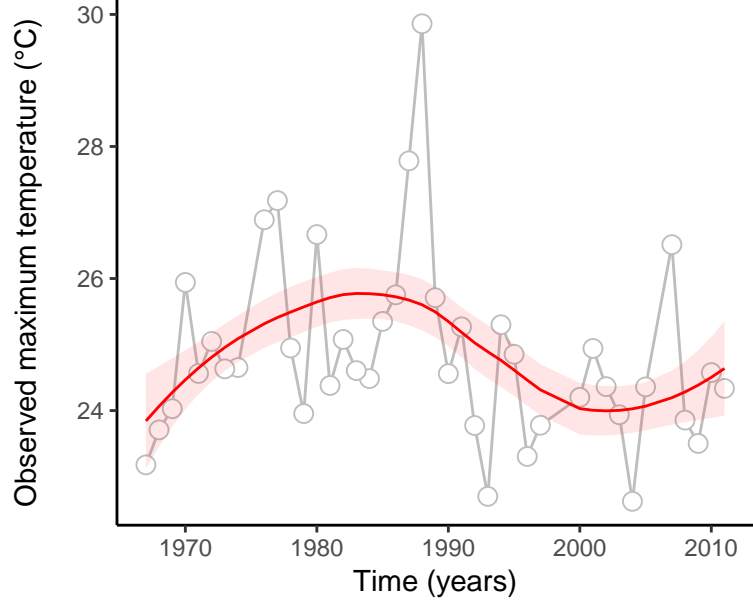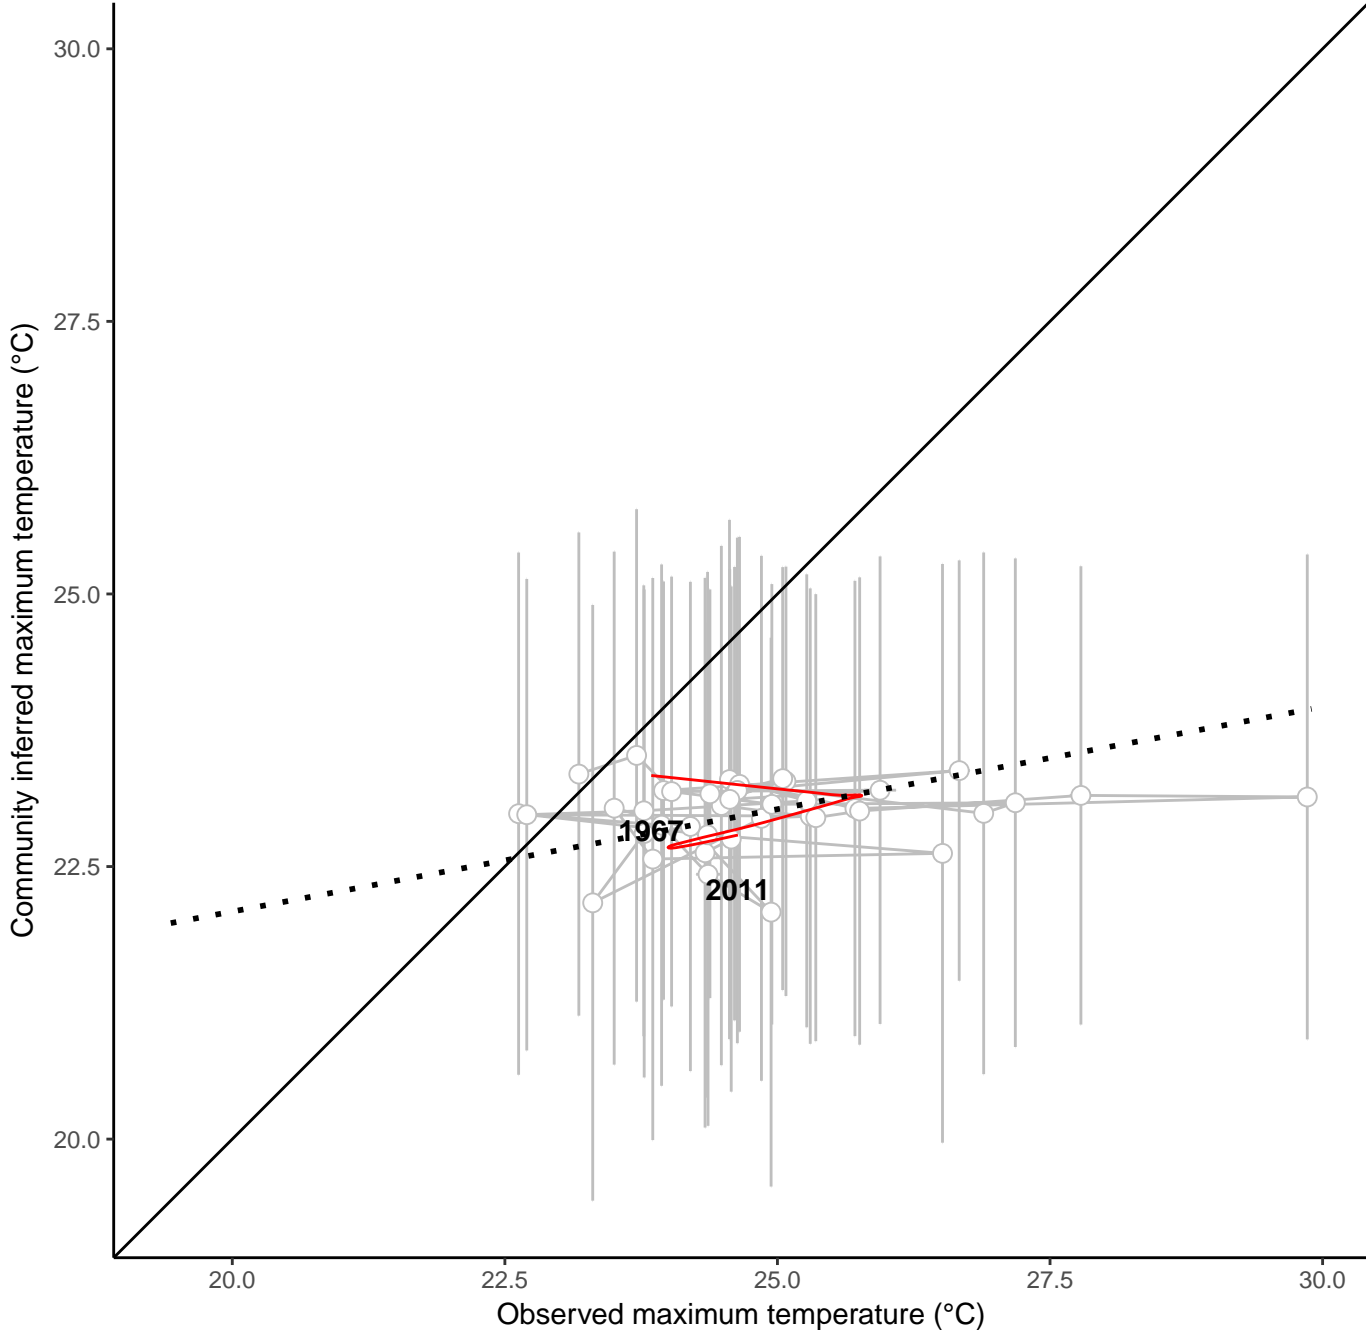

site : 840\_67\_28

absolute deviation = 6.06 | deviation change = -0.09 | maximum state number = 1

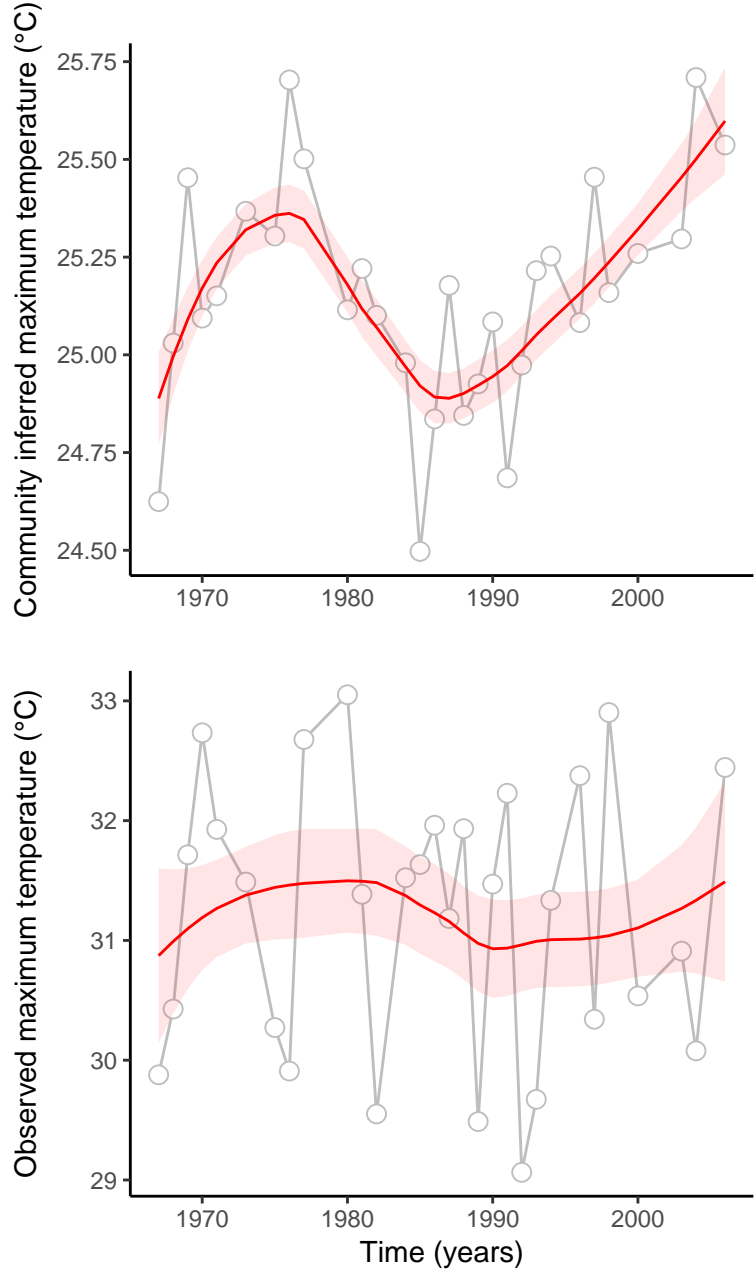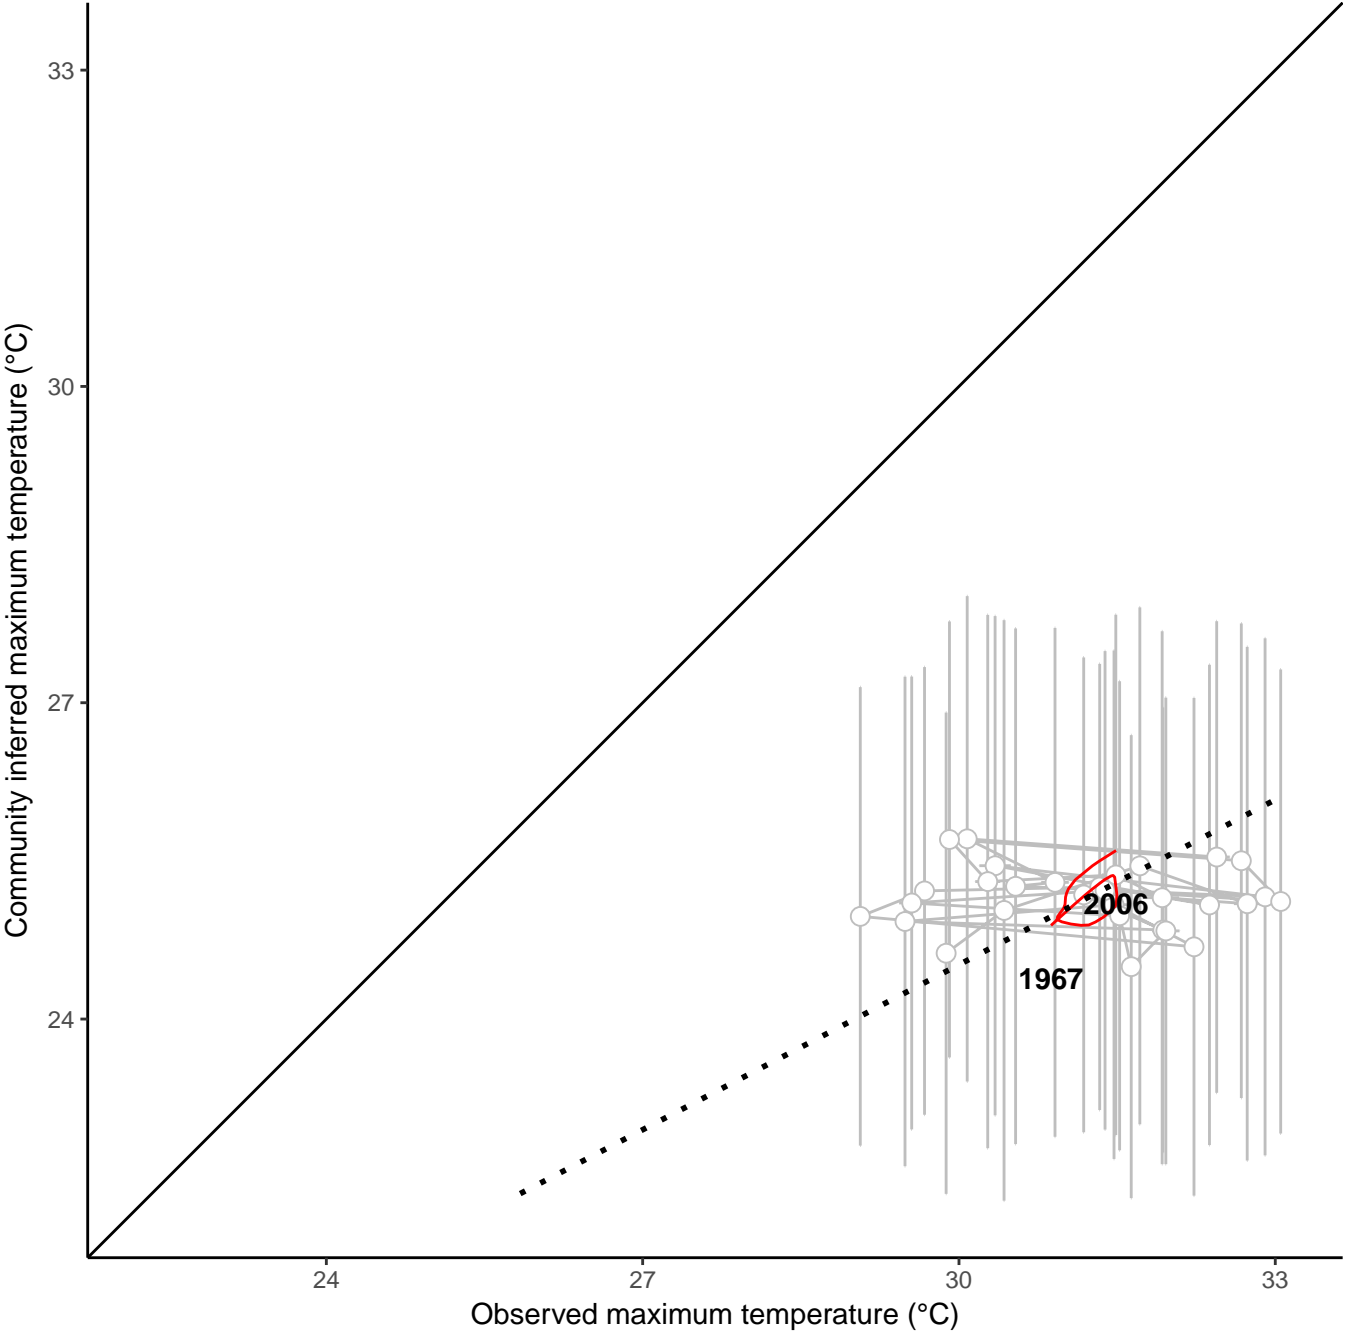

site : 840\_72\_46

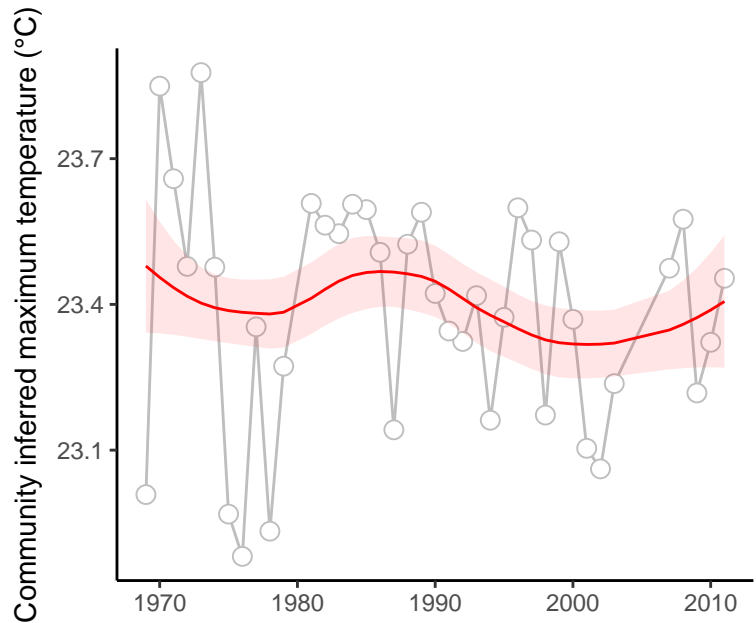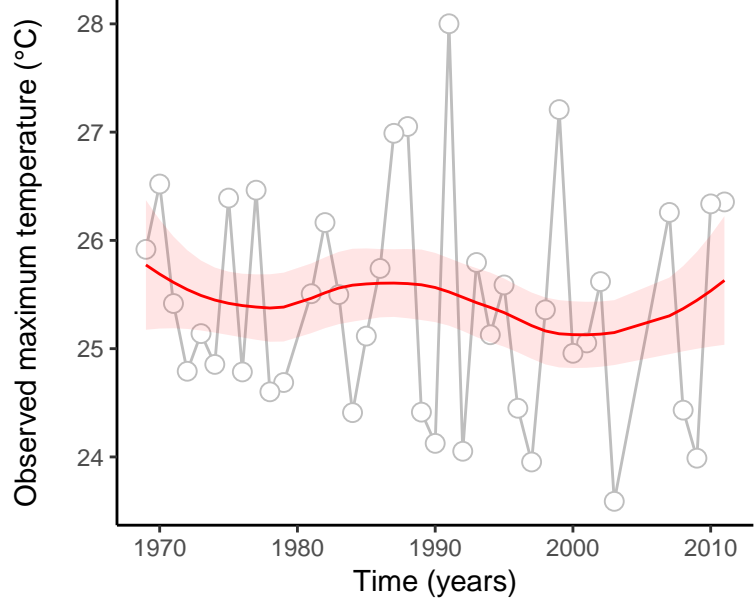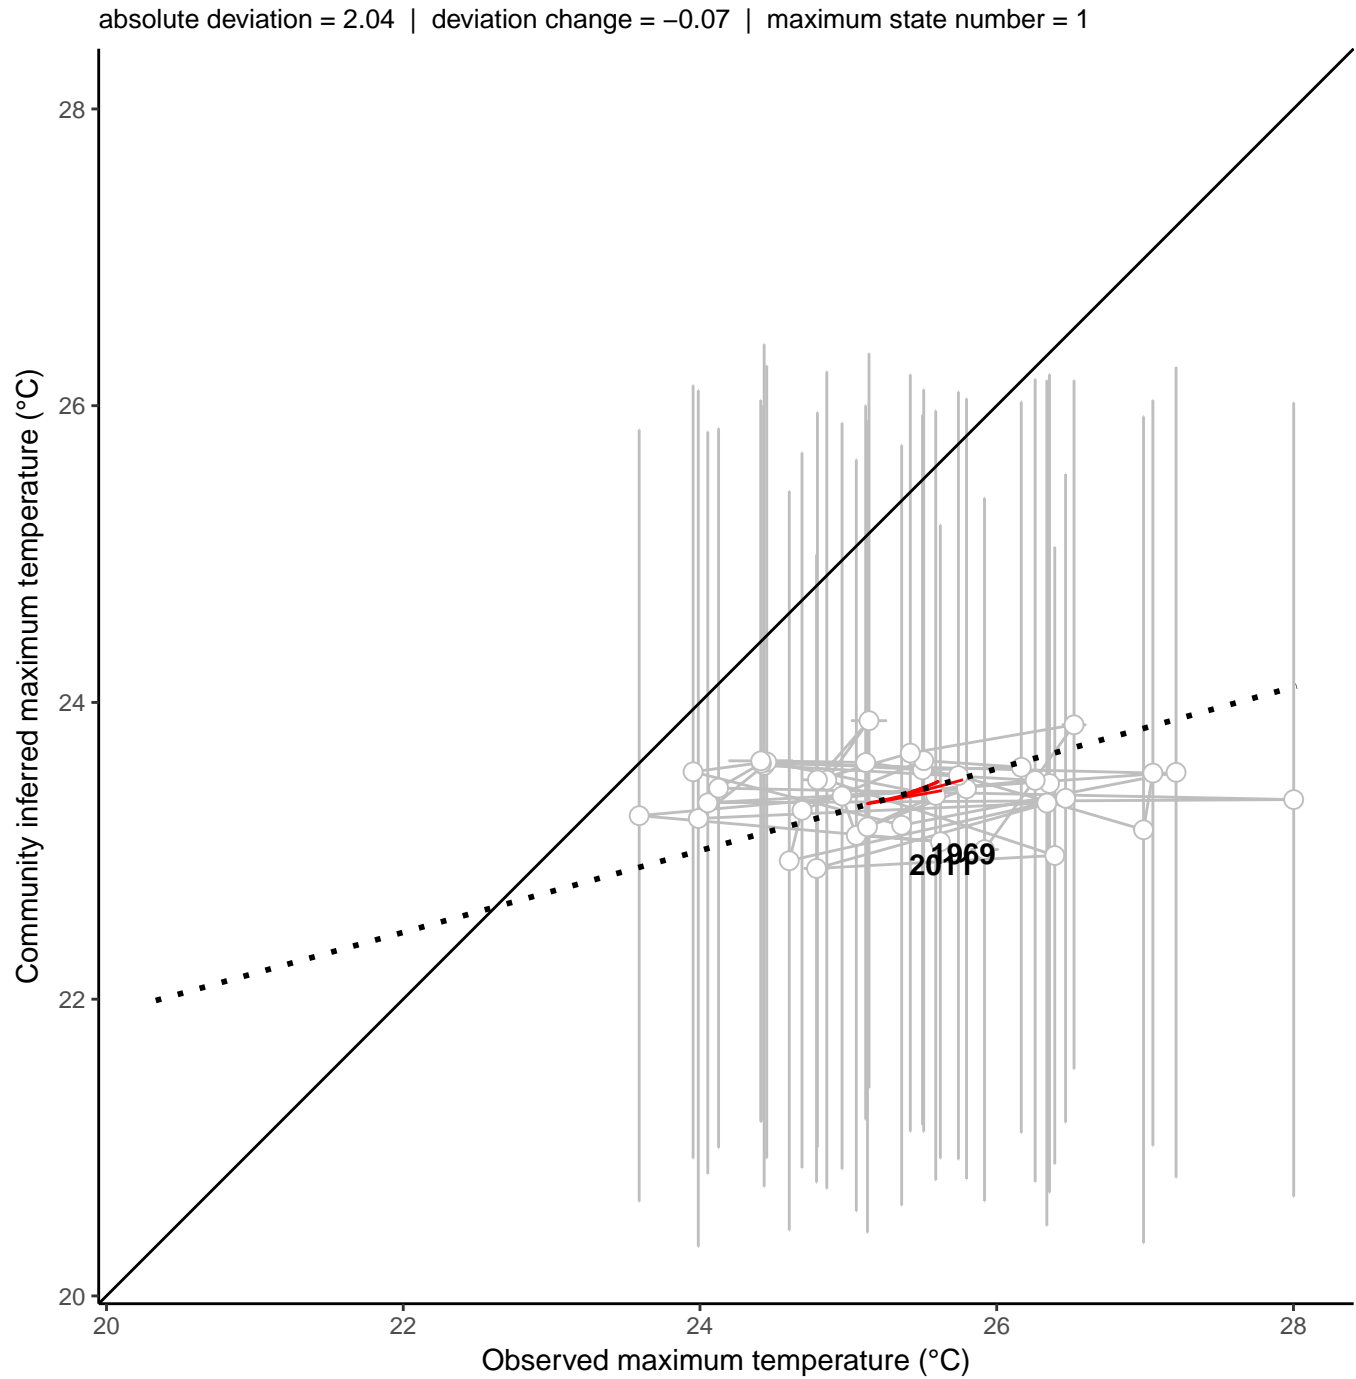

site : 840\_80\_8

absolute deviation = 4.92 | deviation change = 2.84 | maximum state number = 1

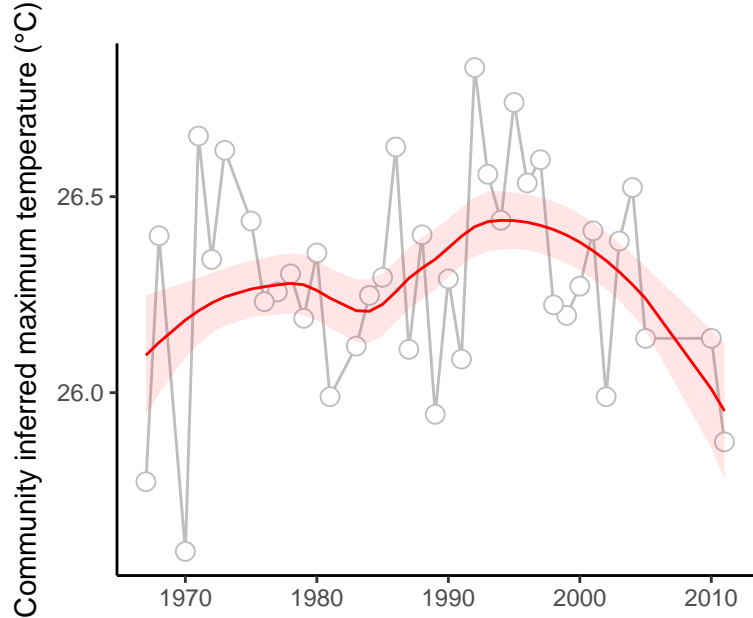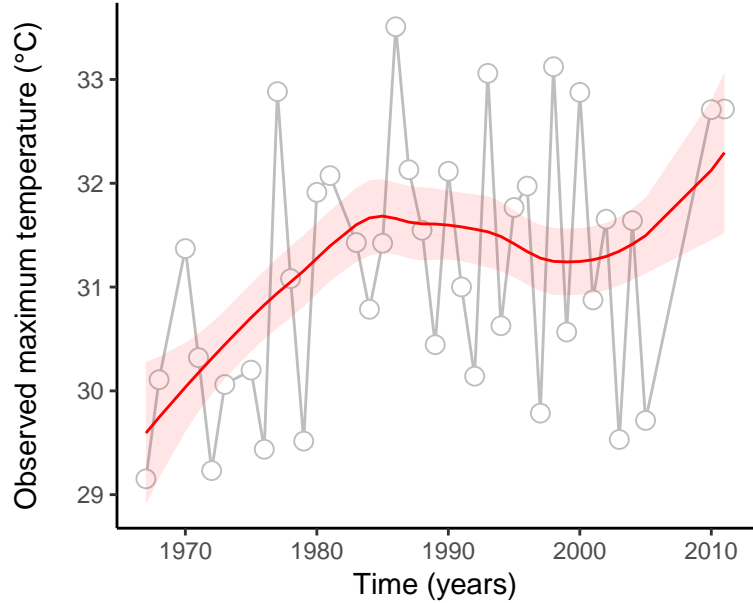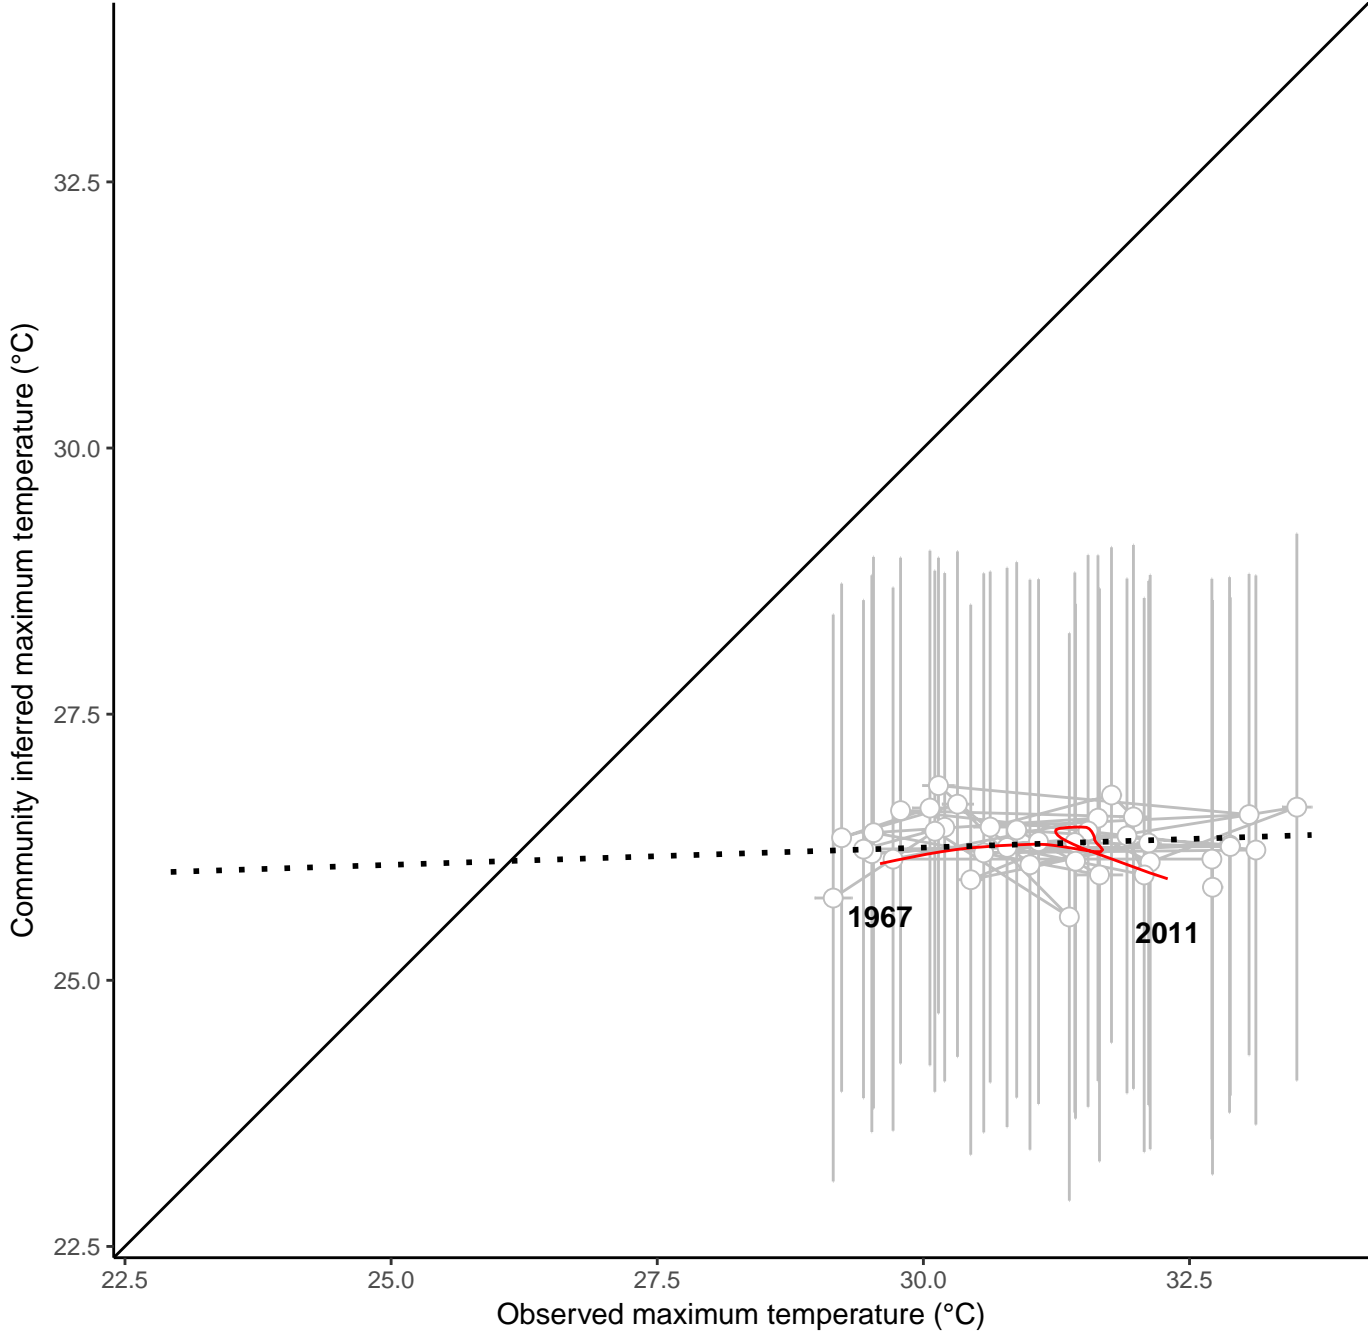

site : 840\_82\_16

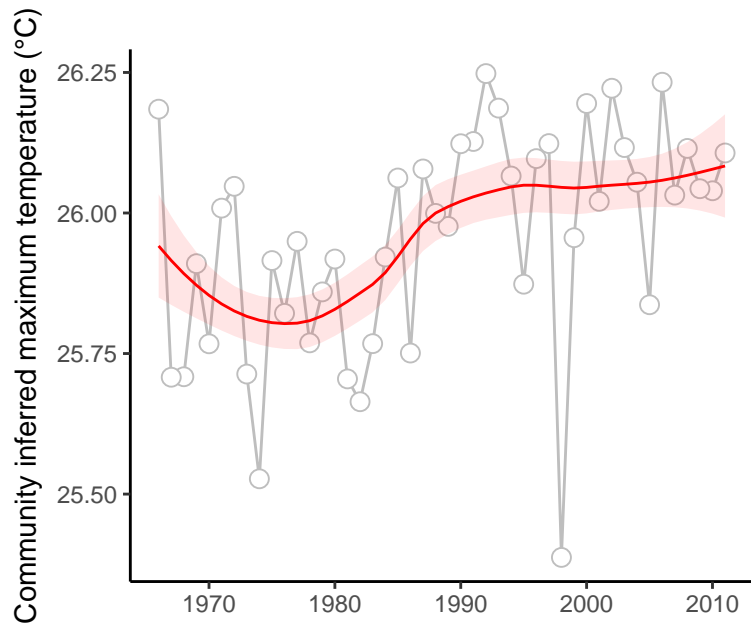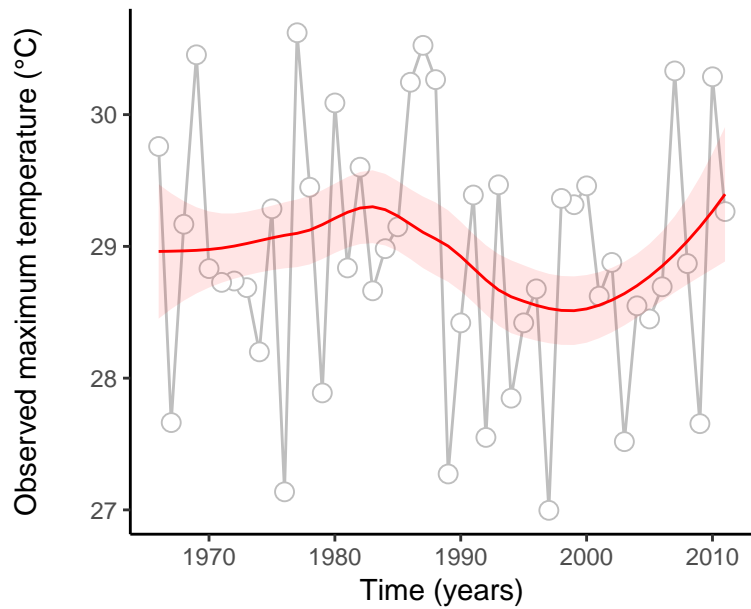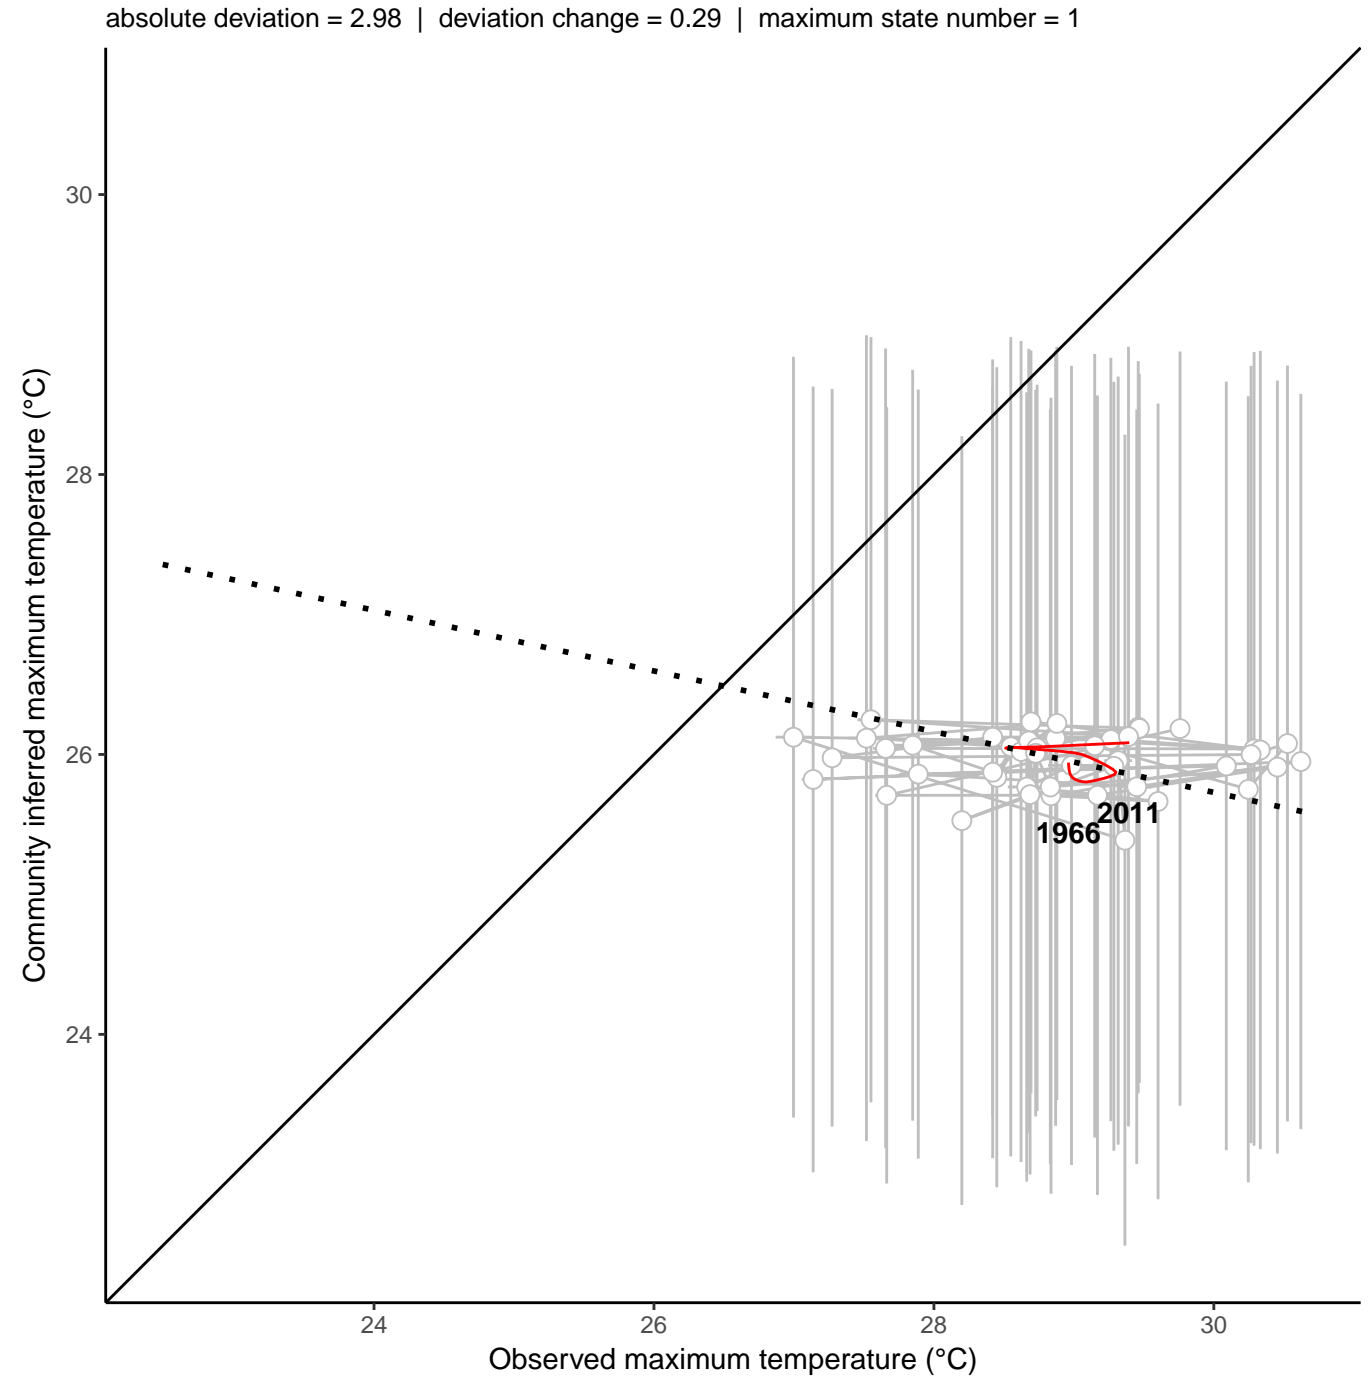

site : 840\_91\_62

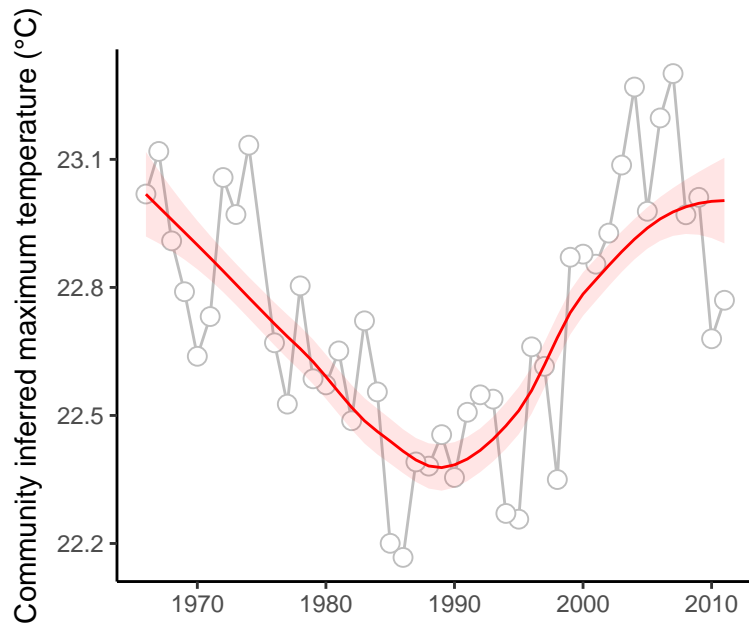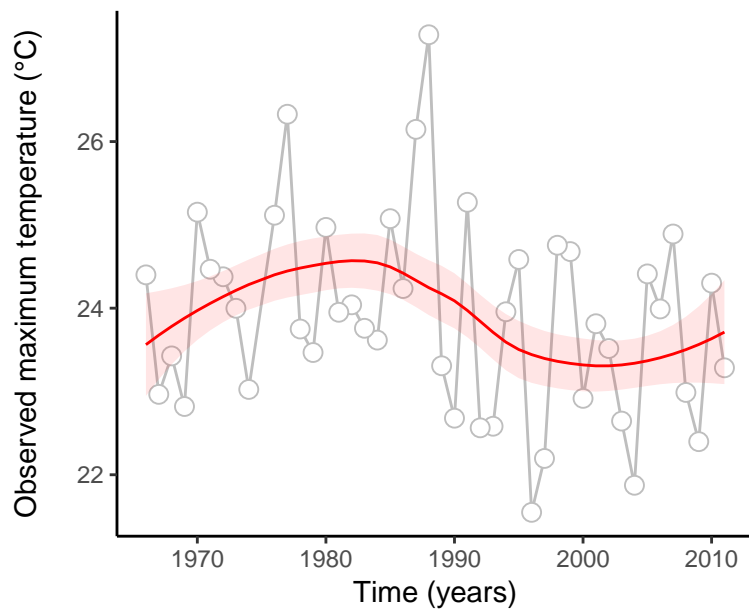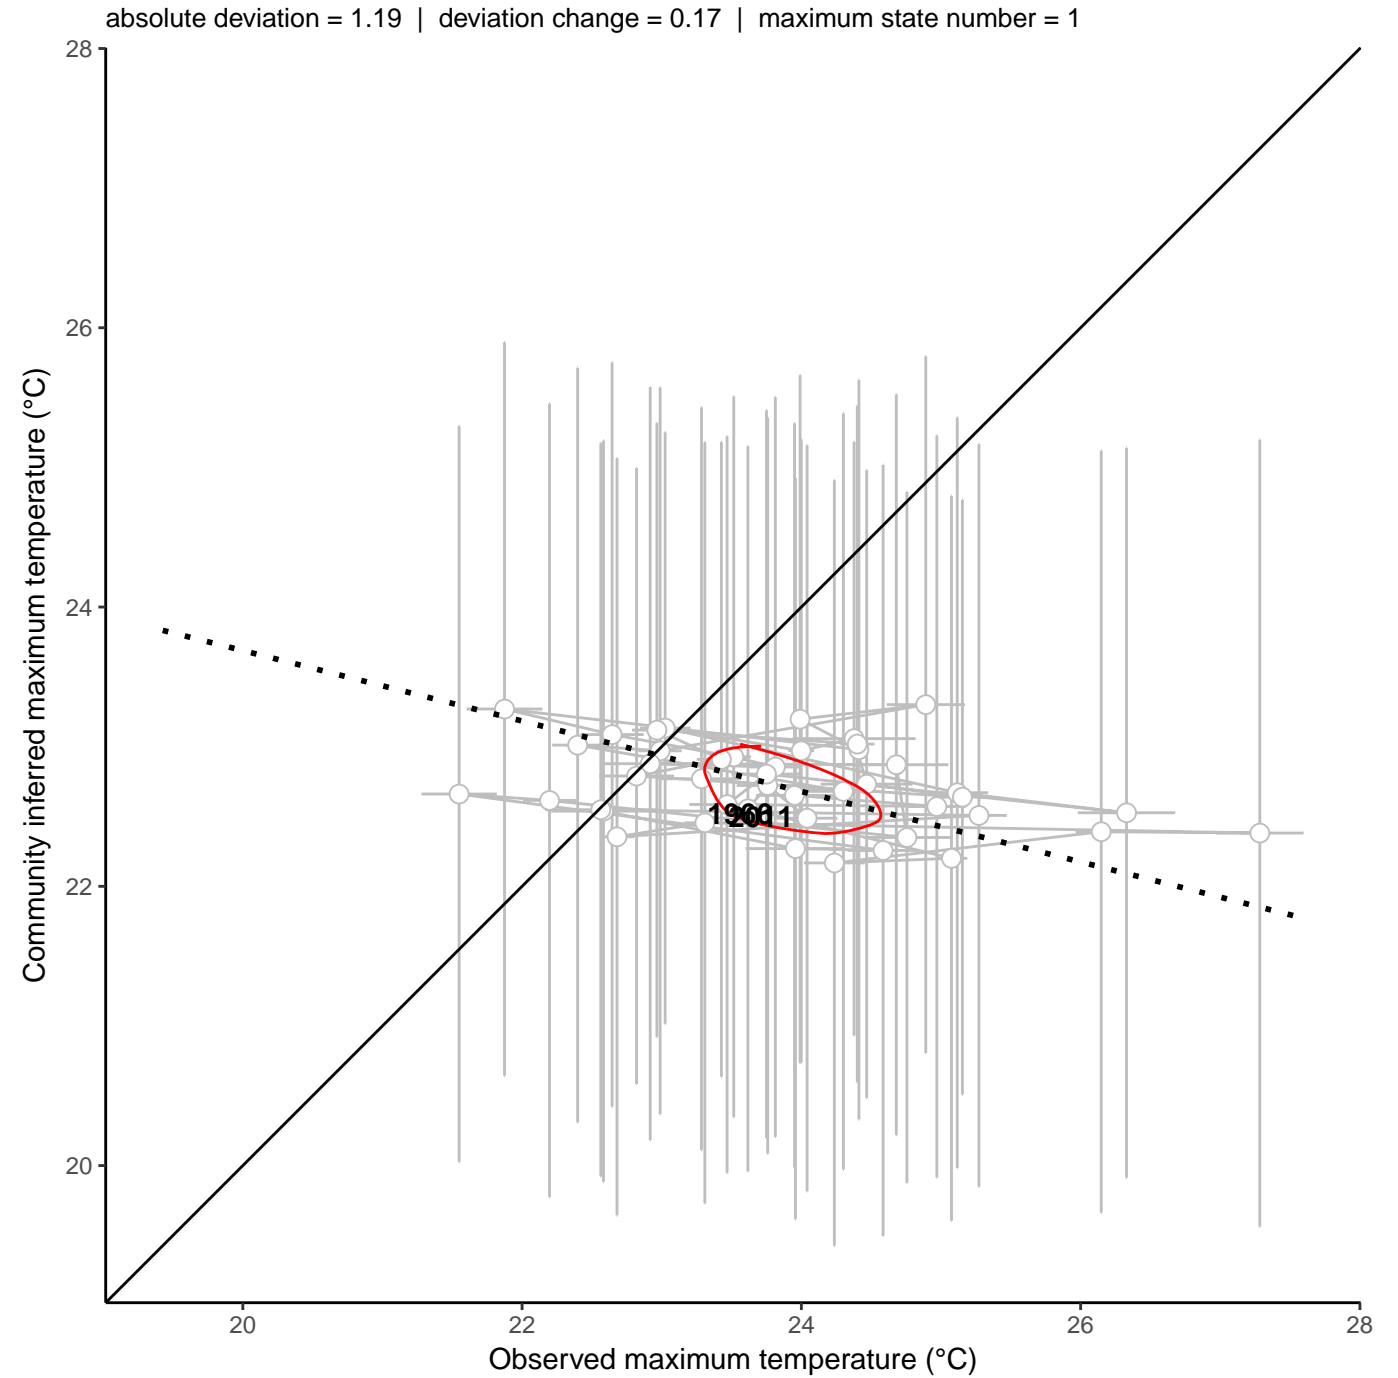

site : 840\_2\_35

absolute deviation = 5.01 | deviation change = 0.71 | maximum state number = 1

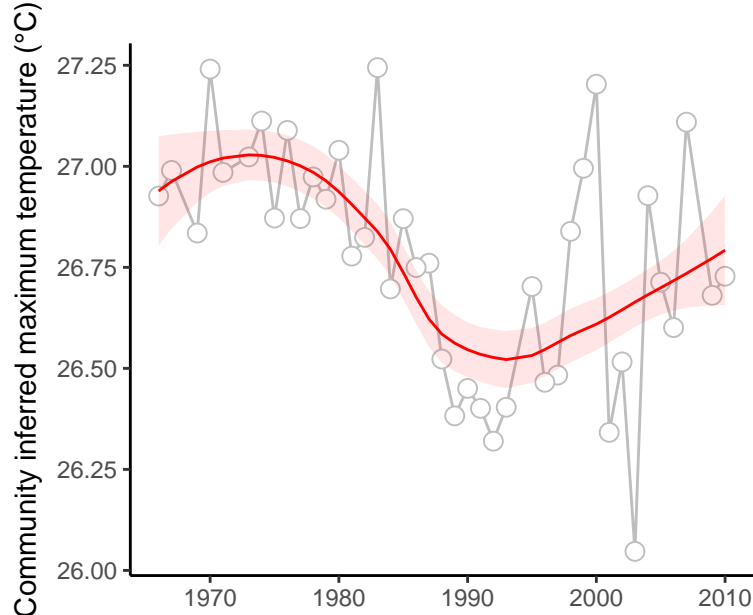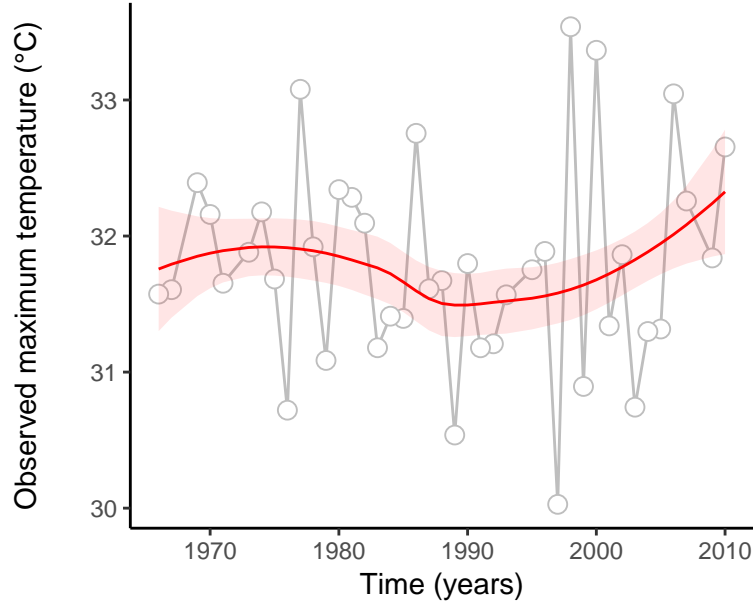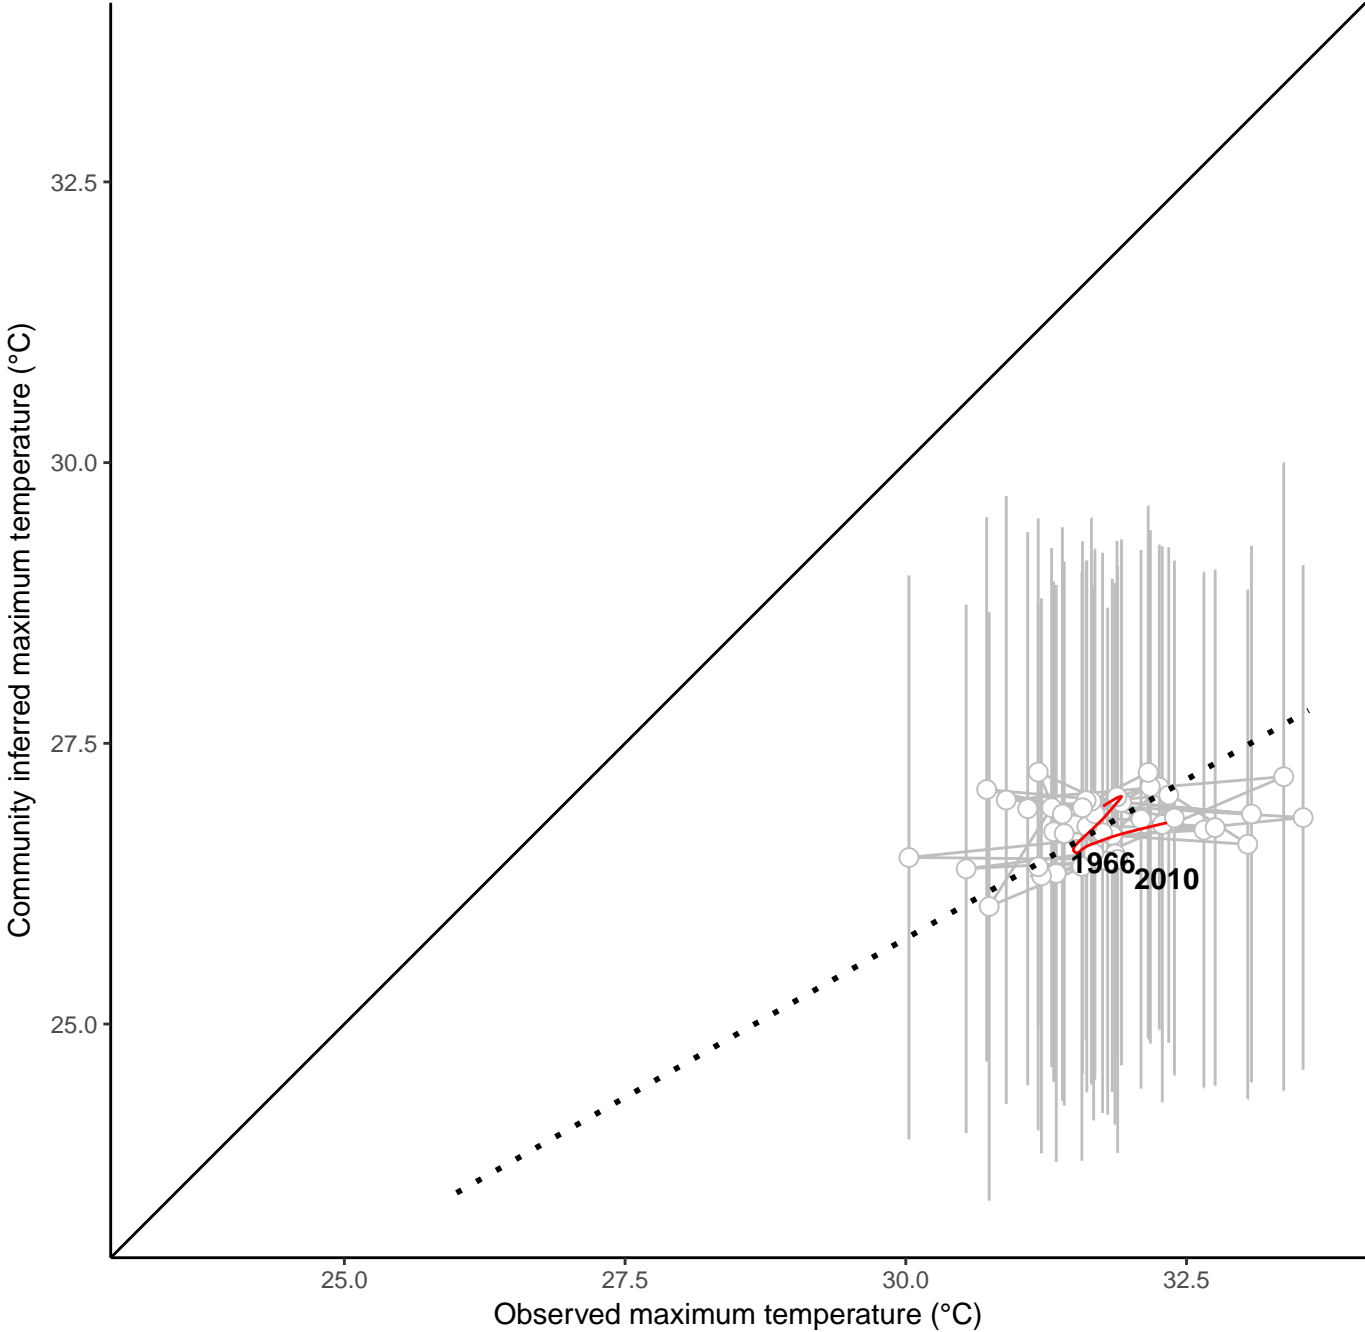

site : 840\_25\_22

absolute deviation = 5.43 | deviation change = -0.59 | maximum state number = 2

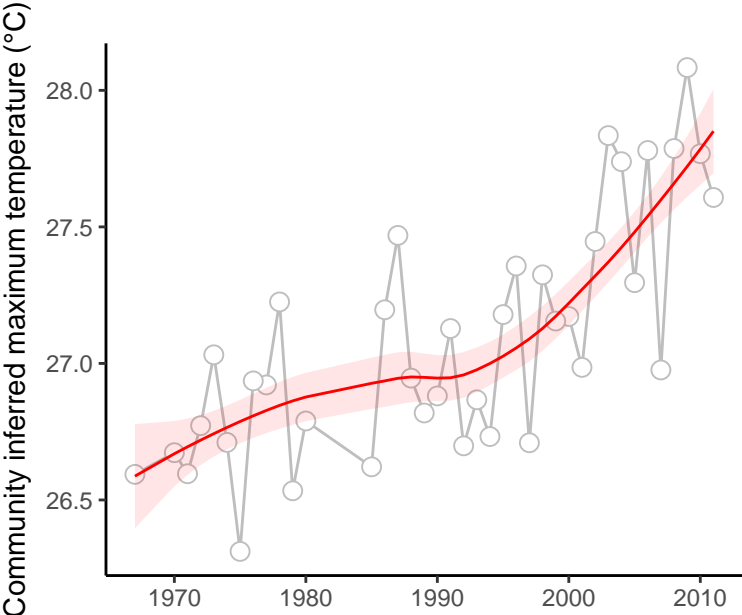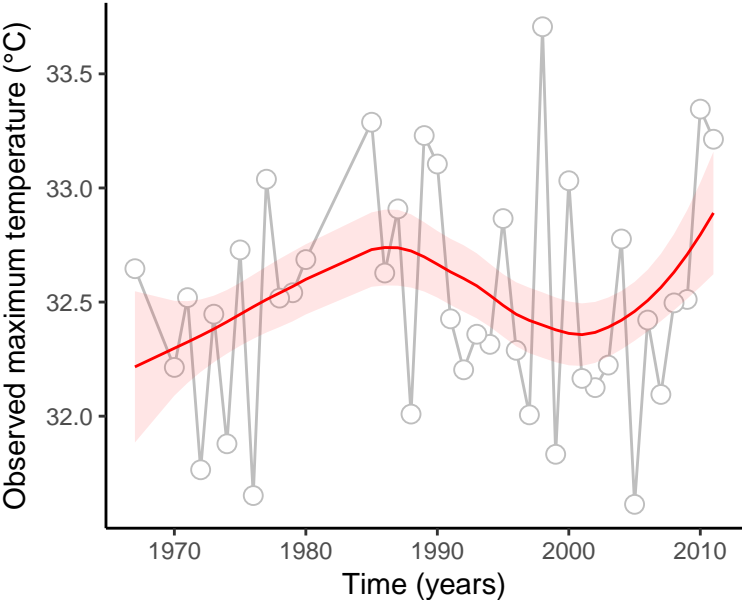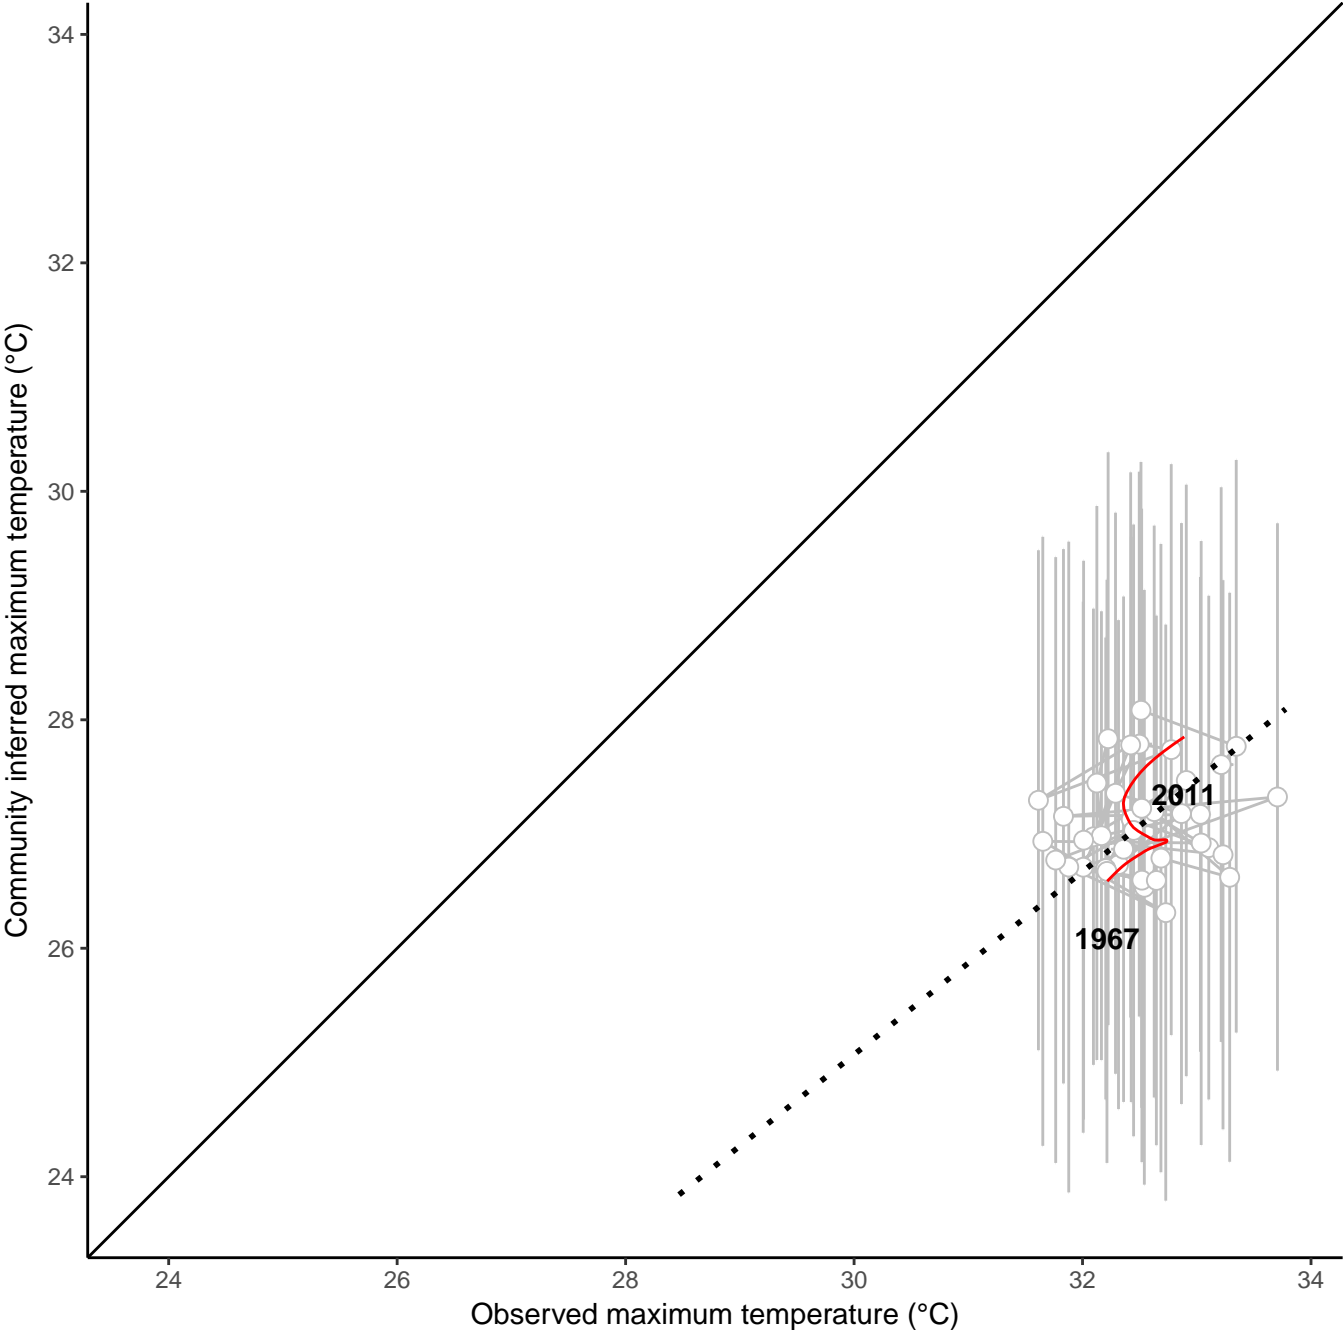



site : 840\_34\_63

absolute deviation = 3.68 | deviation change = 1.17 | maximum state number = 1

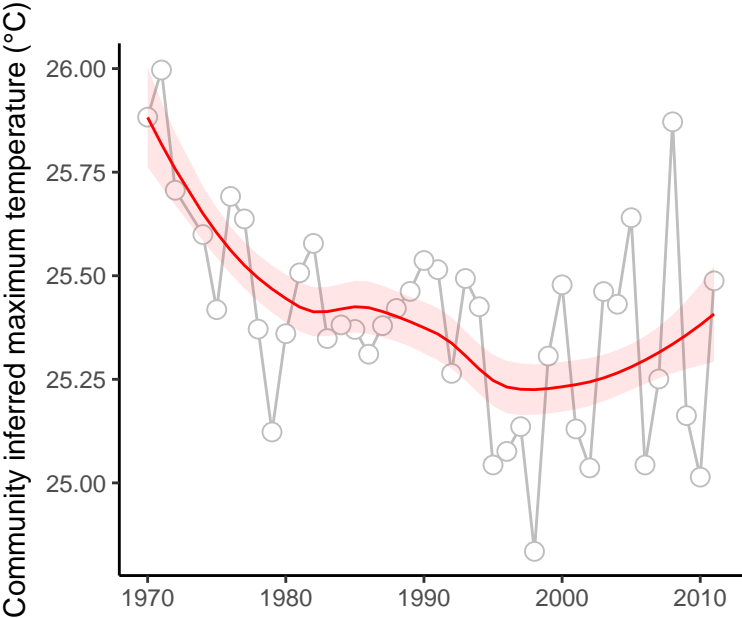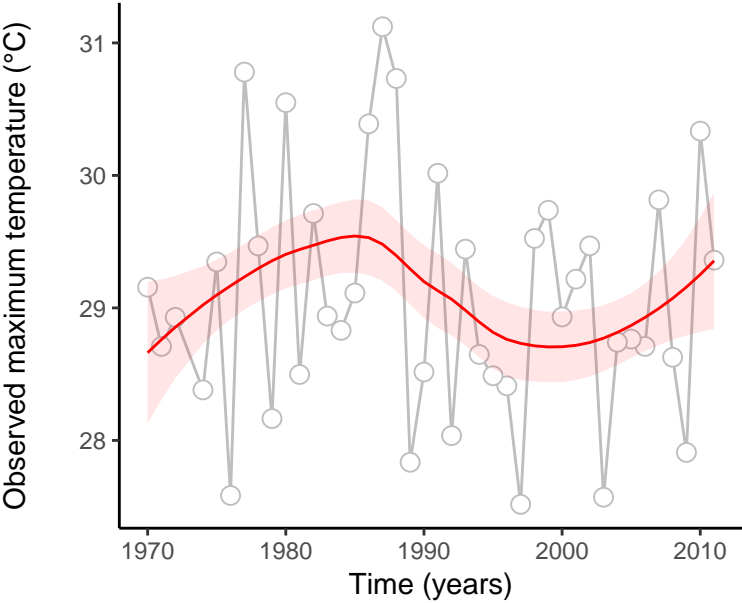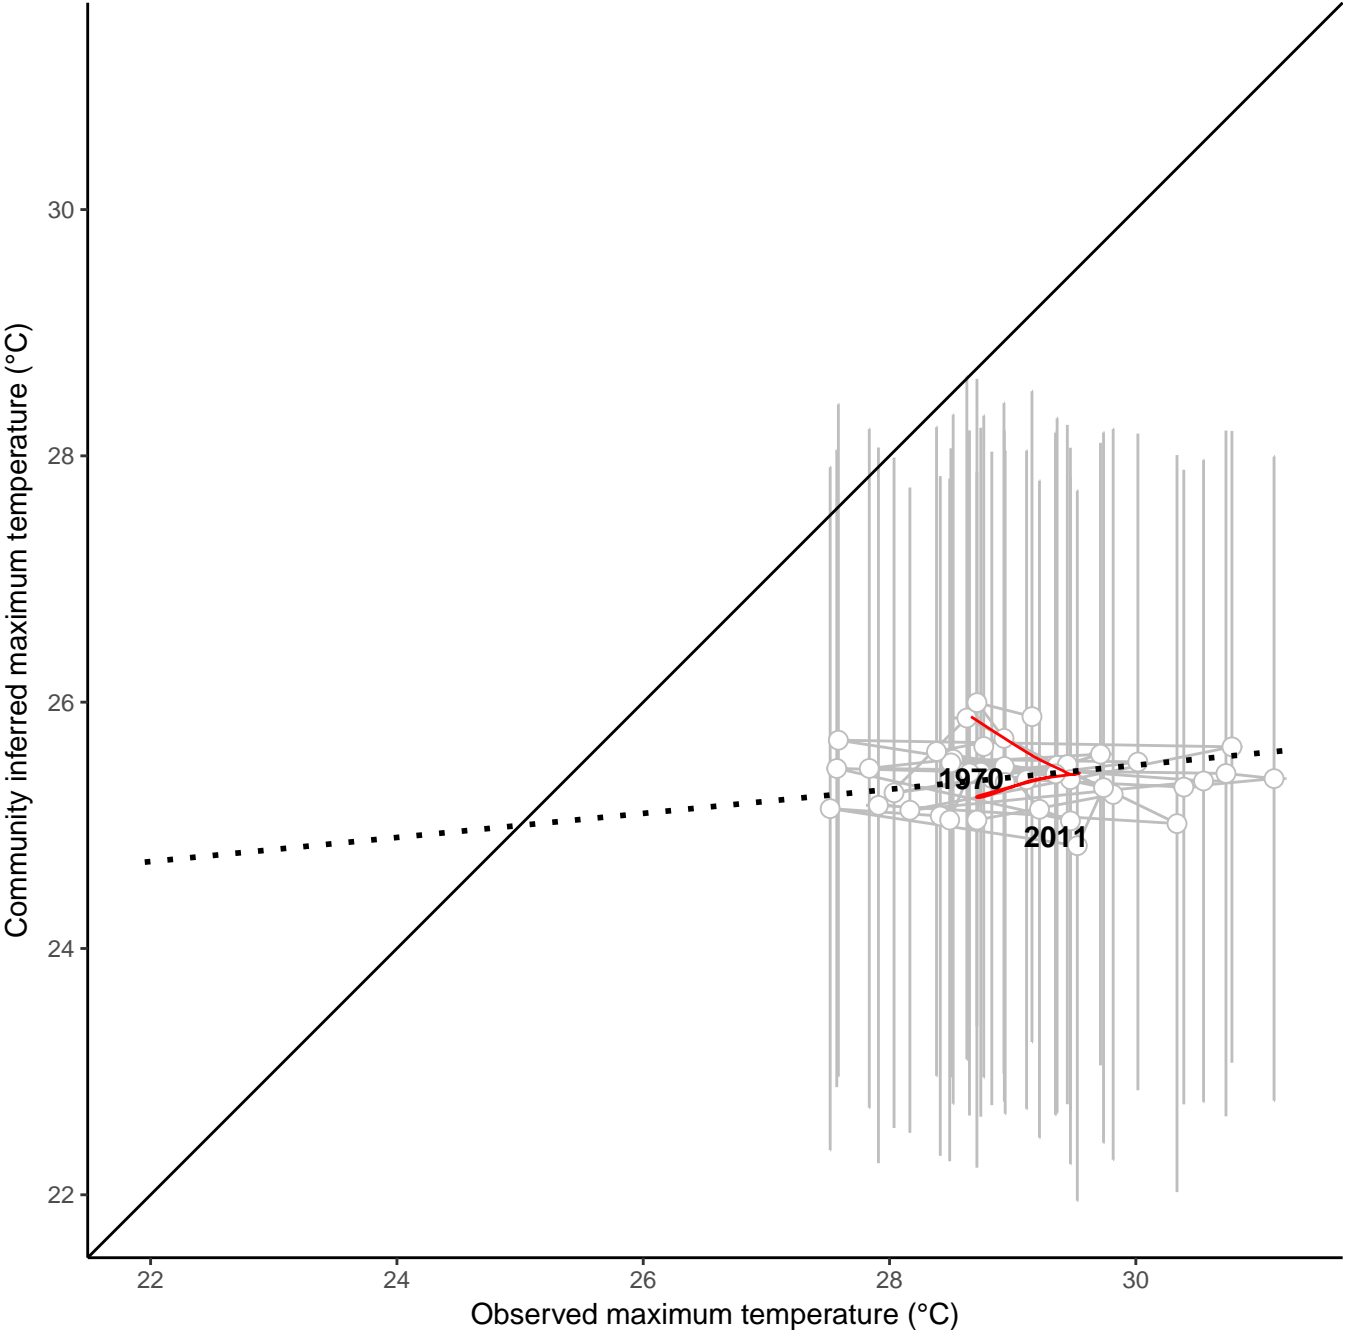

site : 840\_38\_19

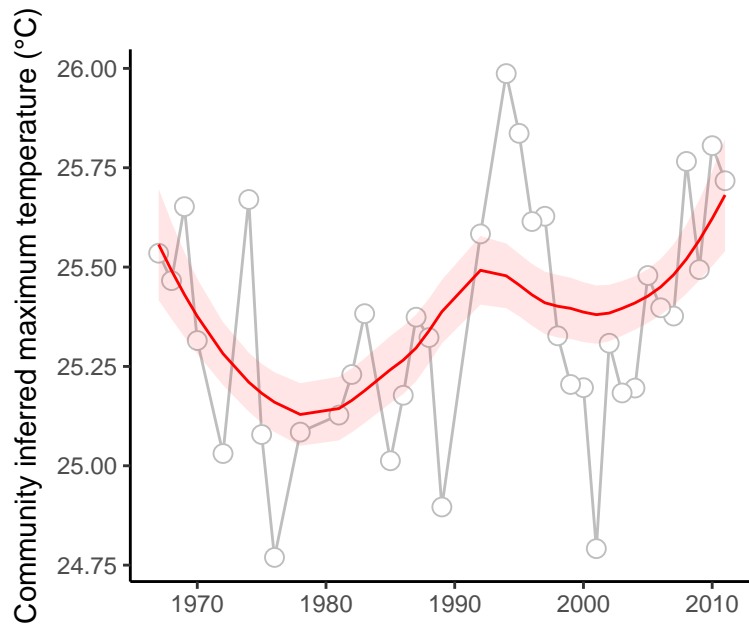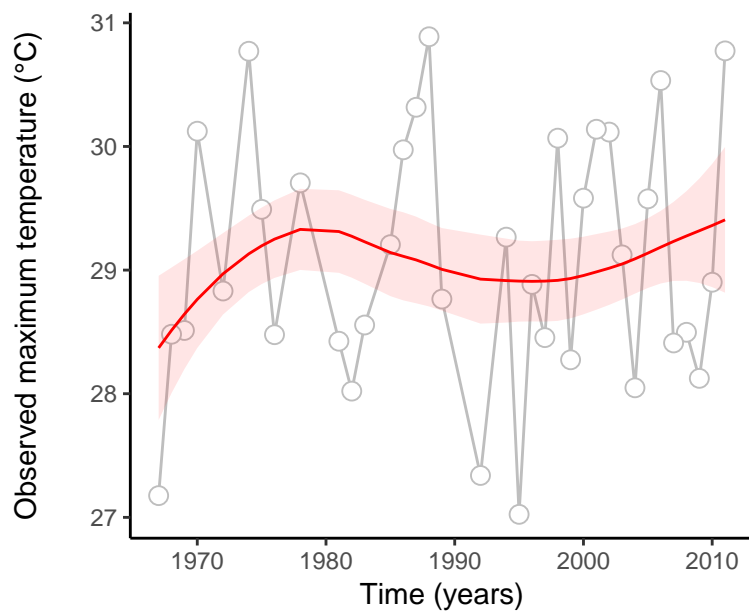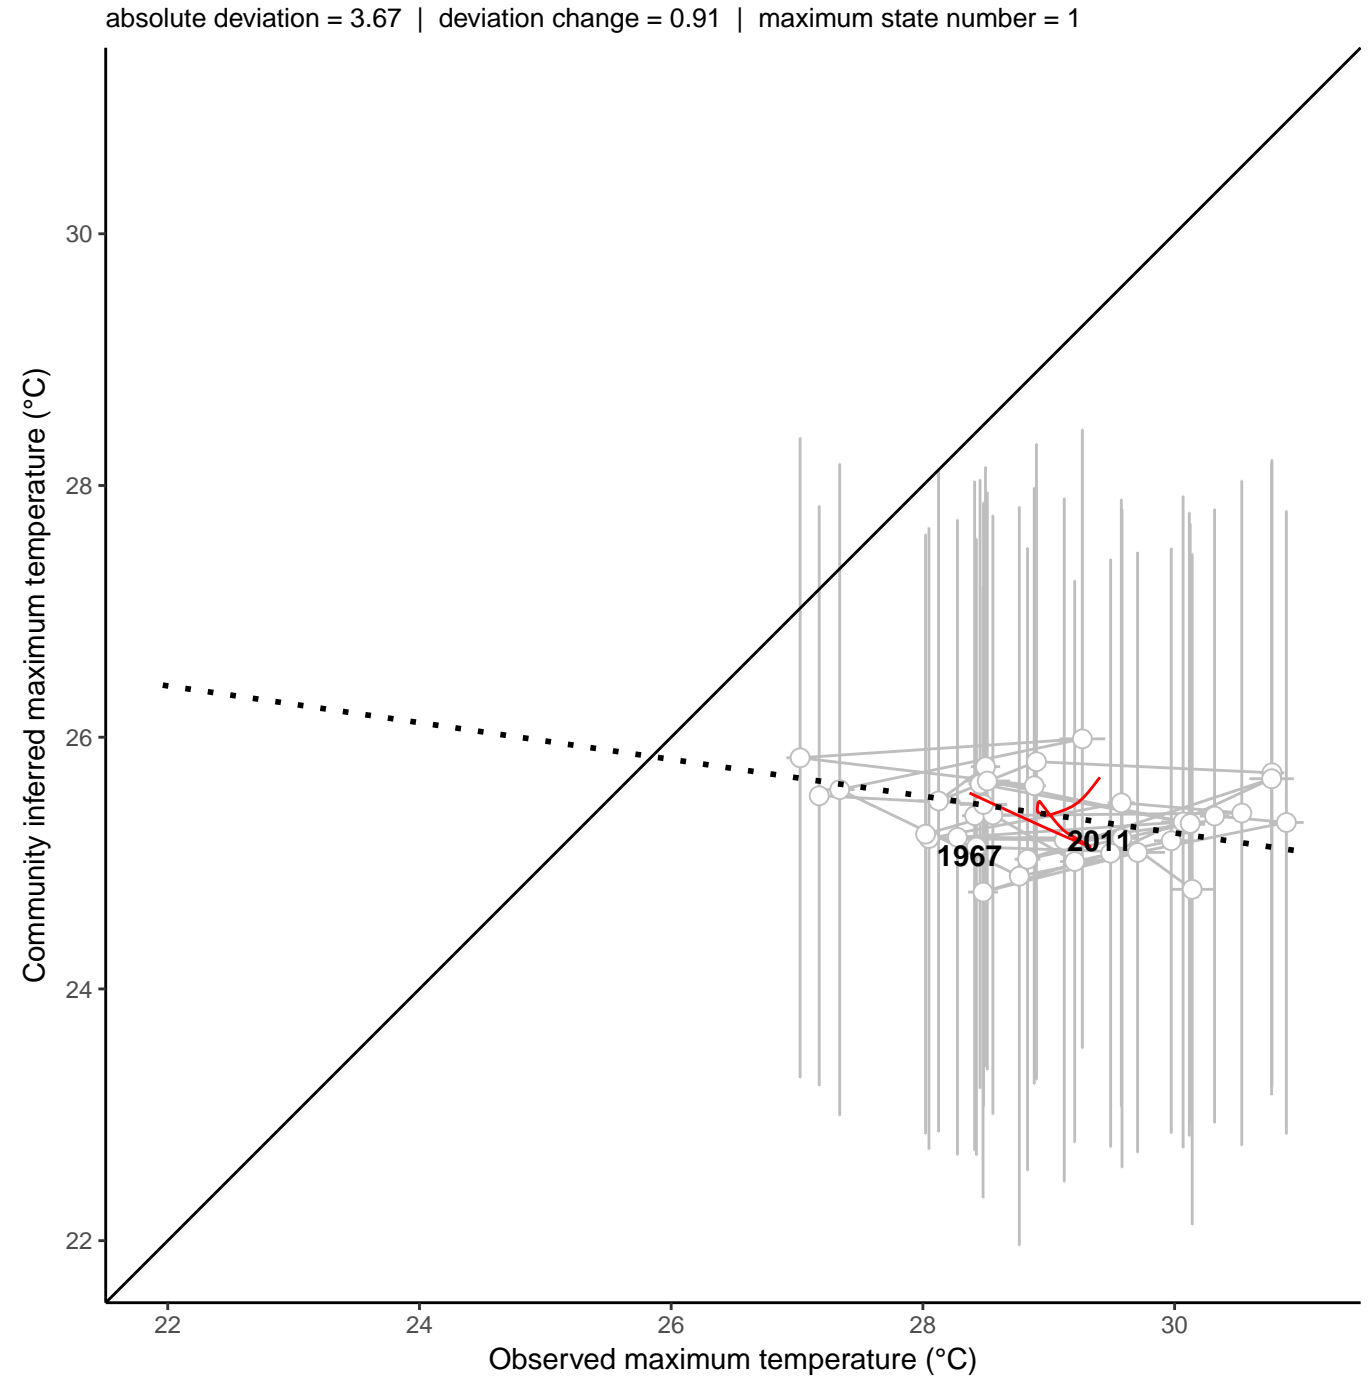

site : 840\_38\_32

absolute deviation = 4.66 | deviation change = 1.03 | maximum state number = 1

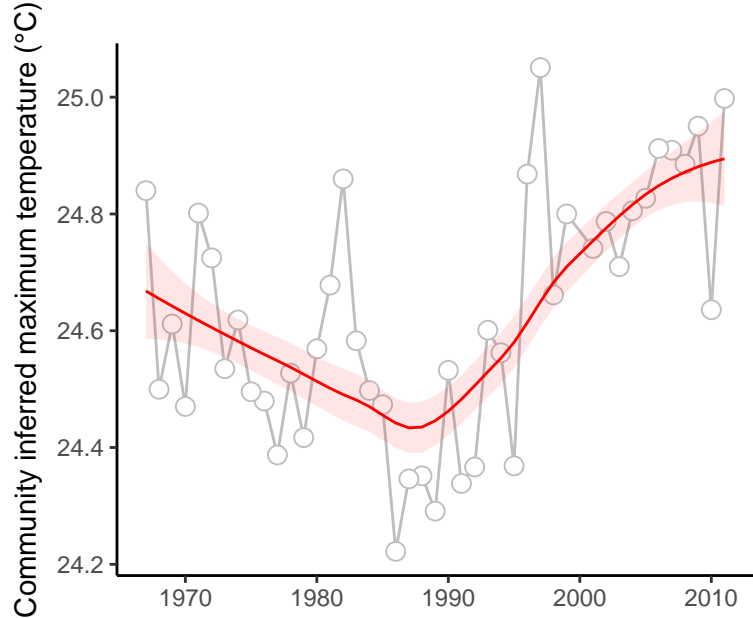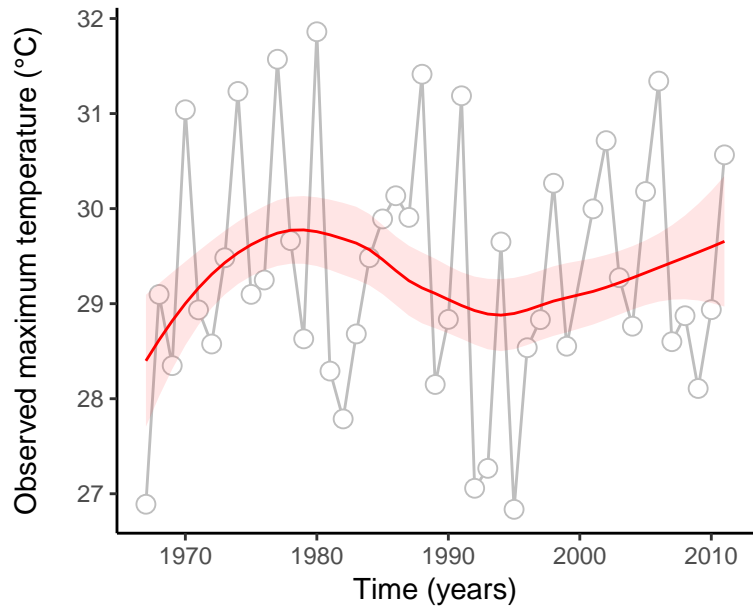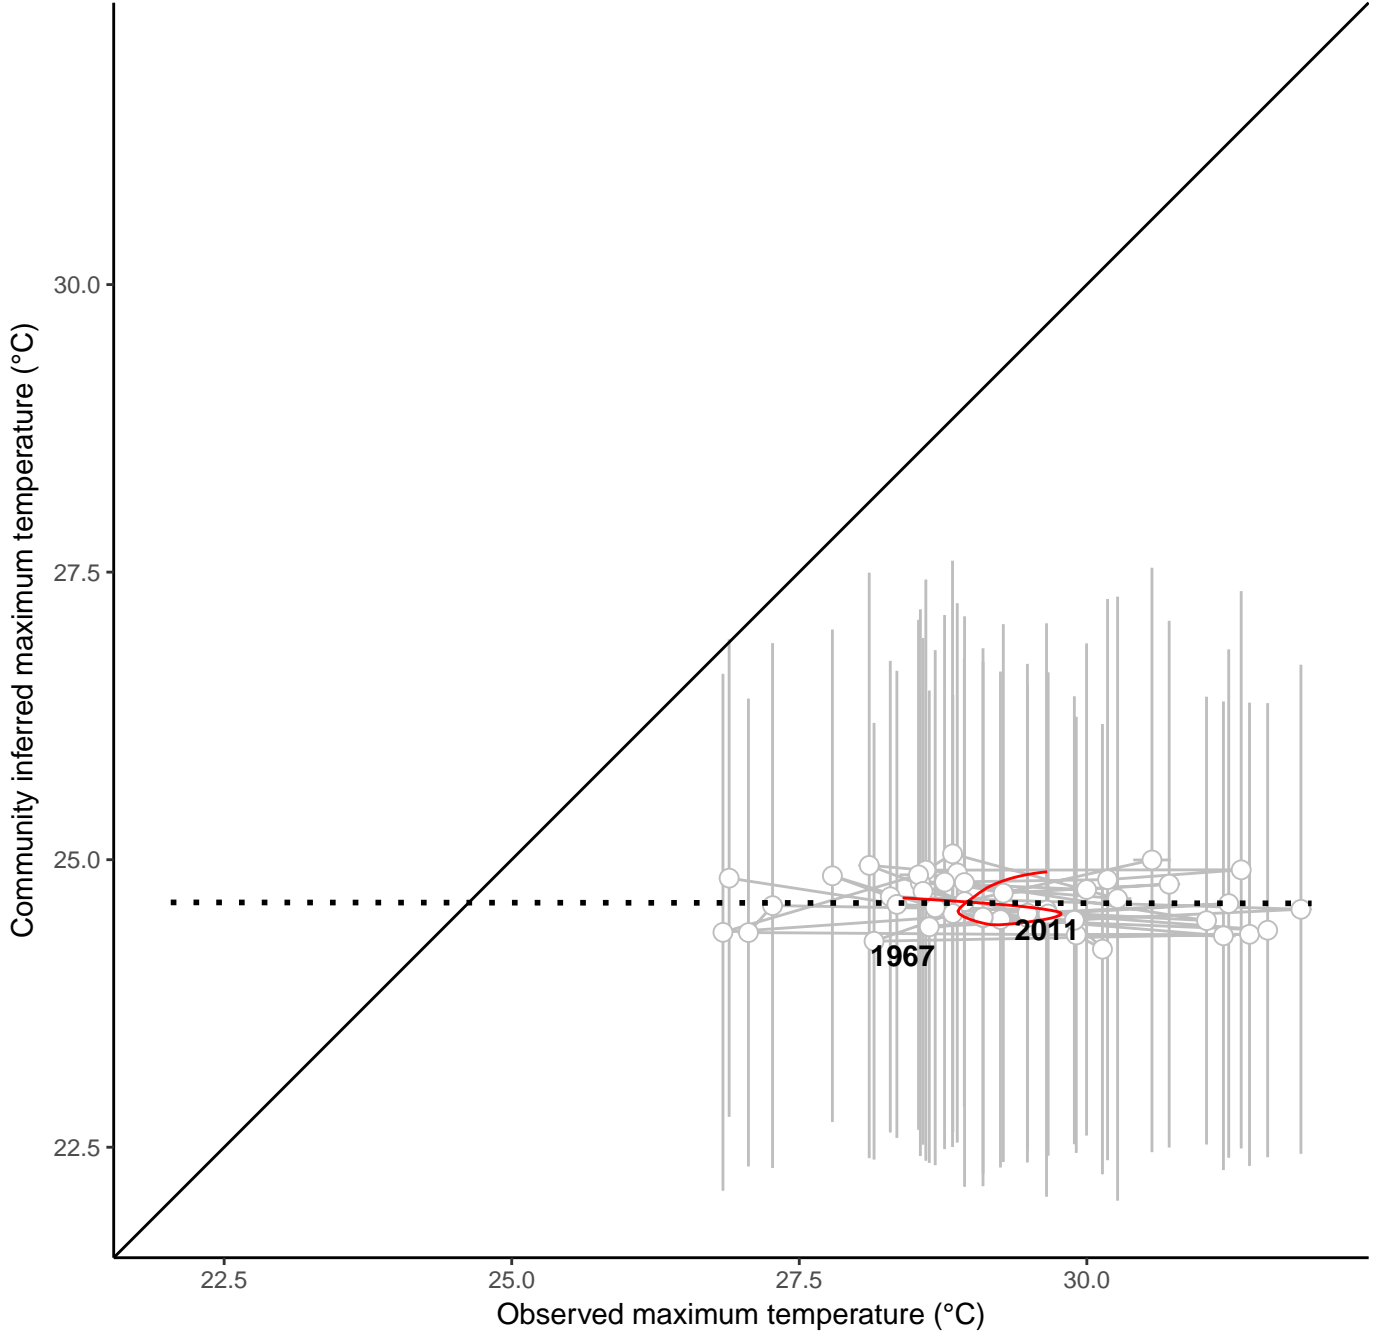

site : 840\_44\_5

absolute deviation = 0.57 | deviation change = 0.8 | maximum state number = 1

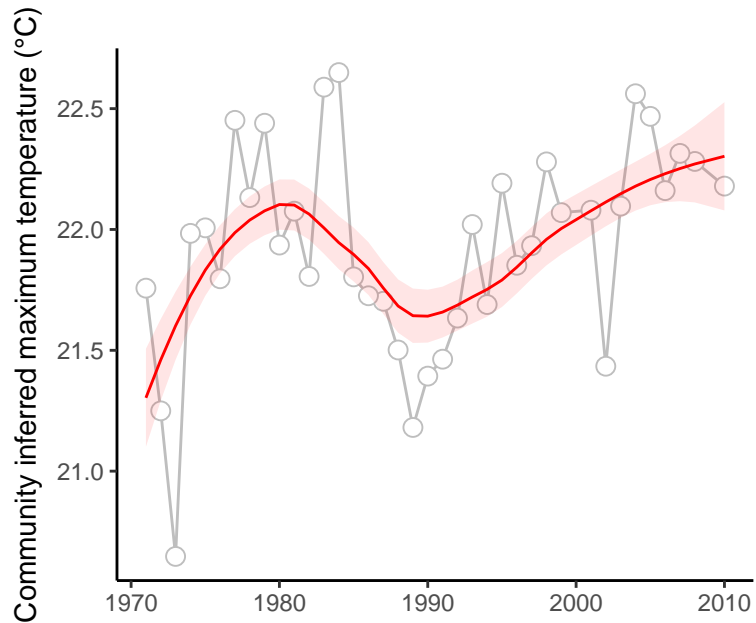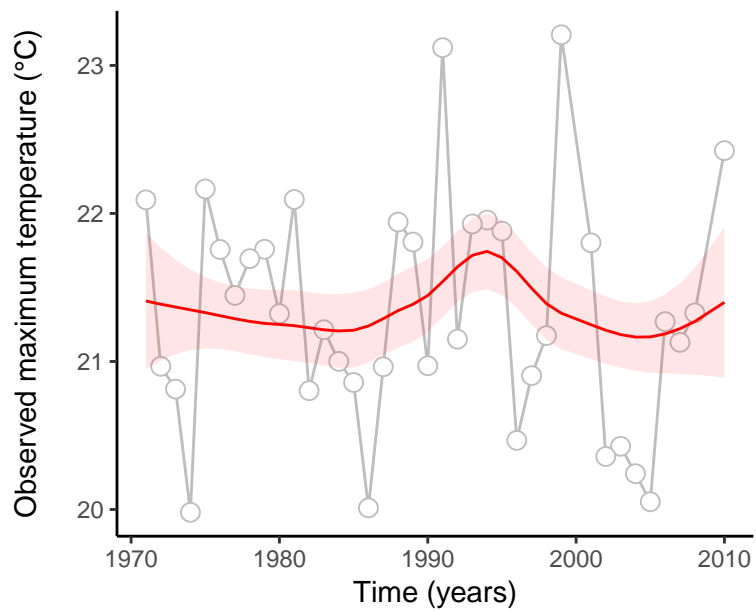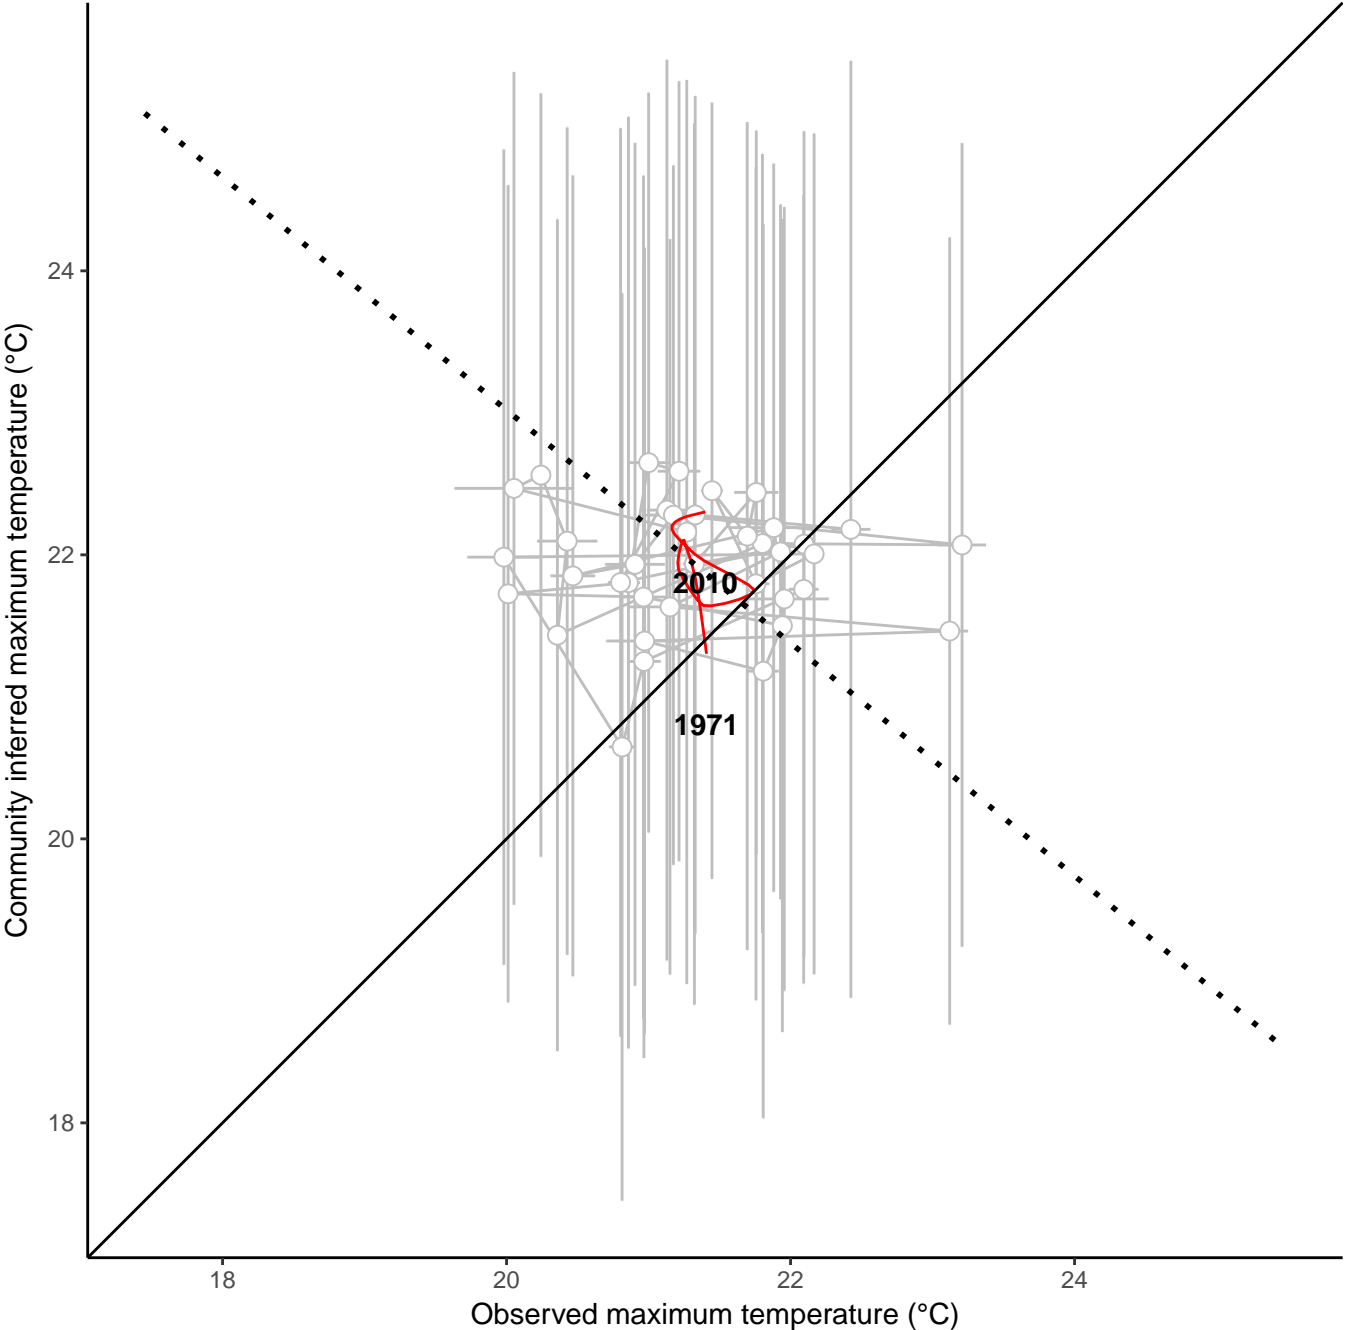

site : 840\_46\_18

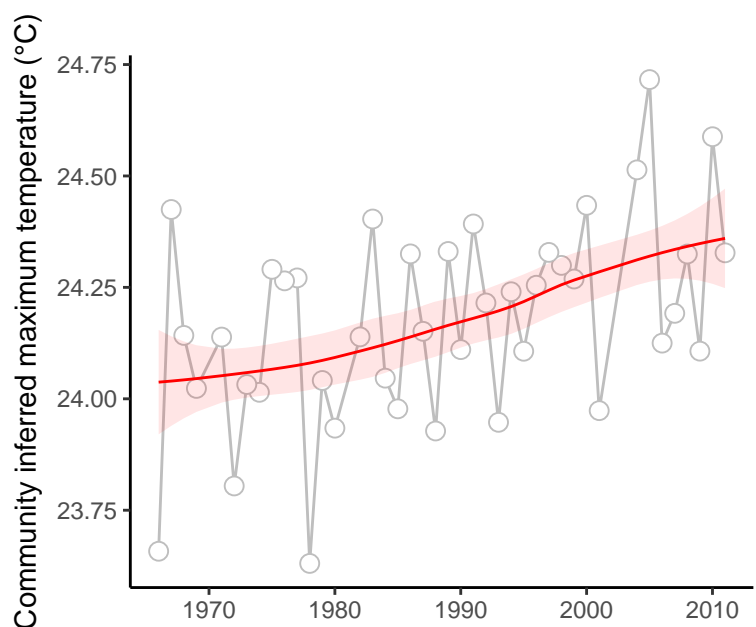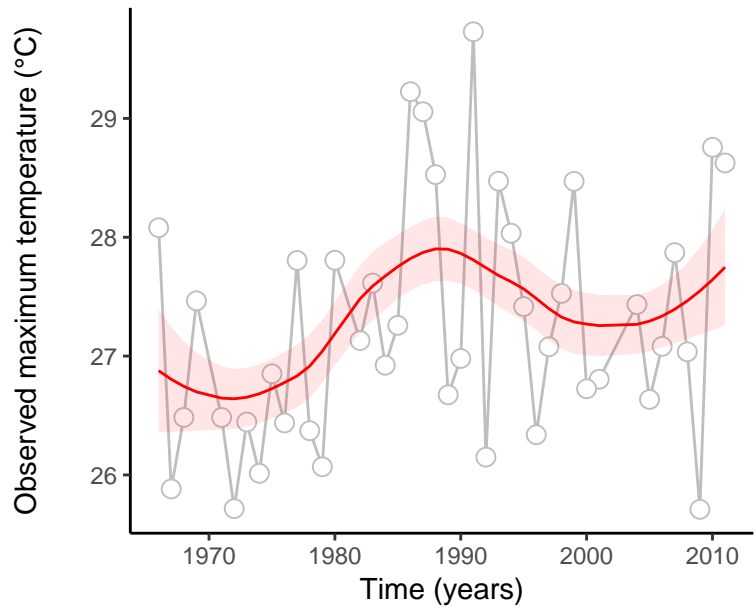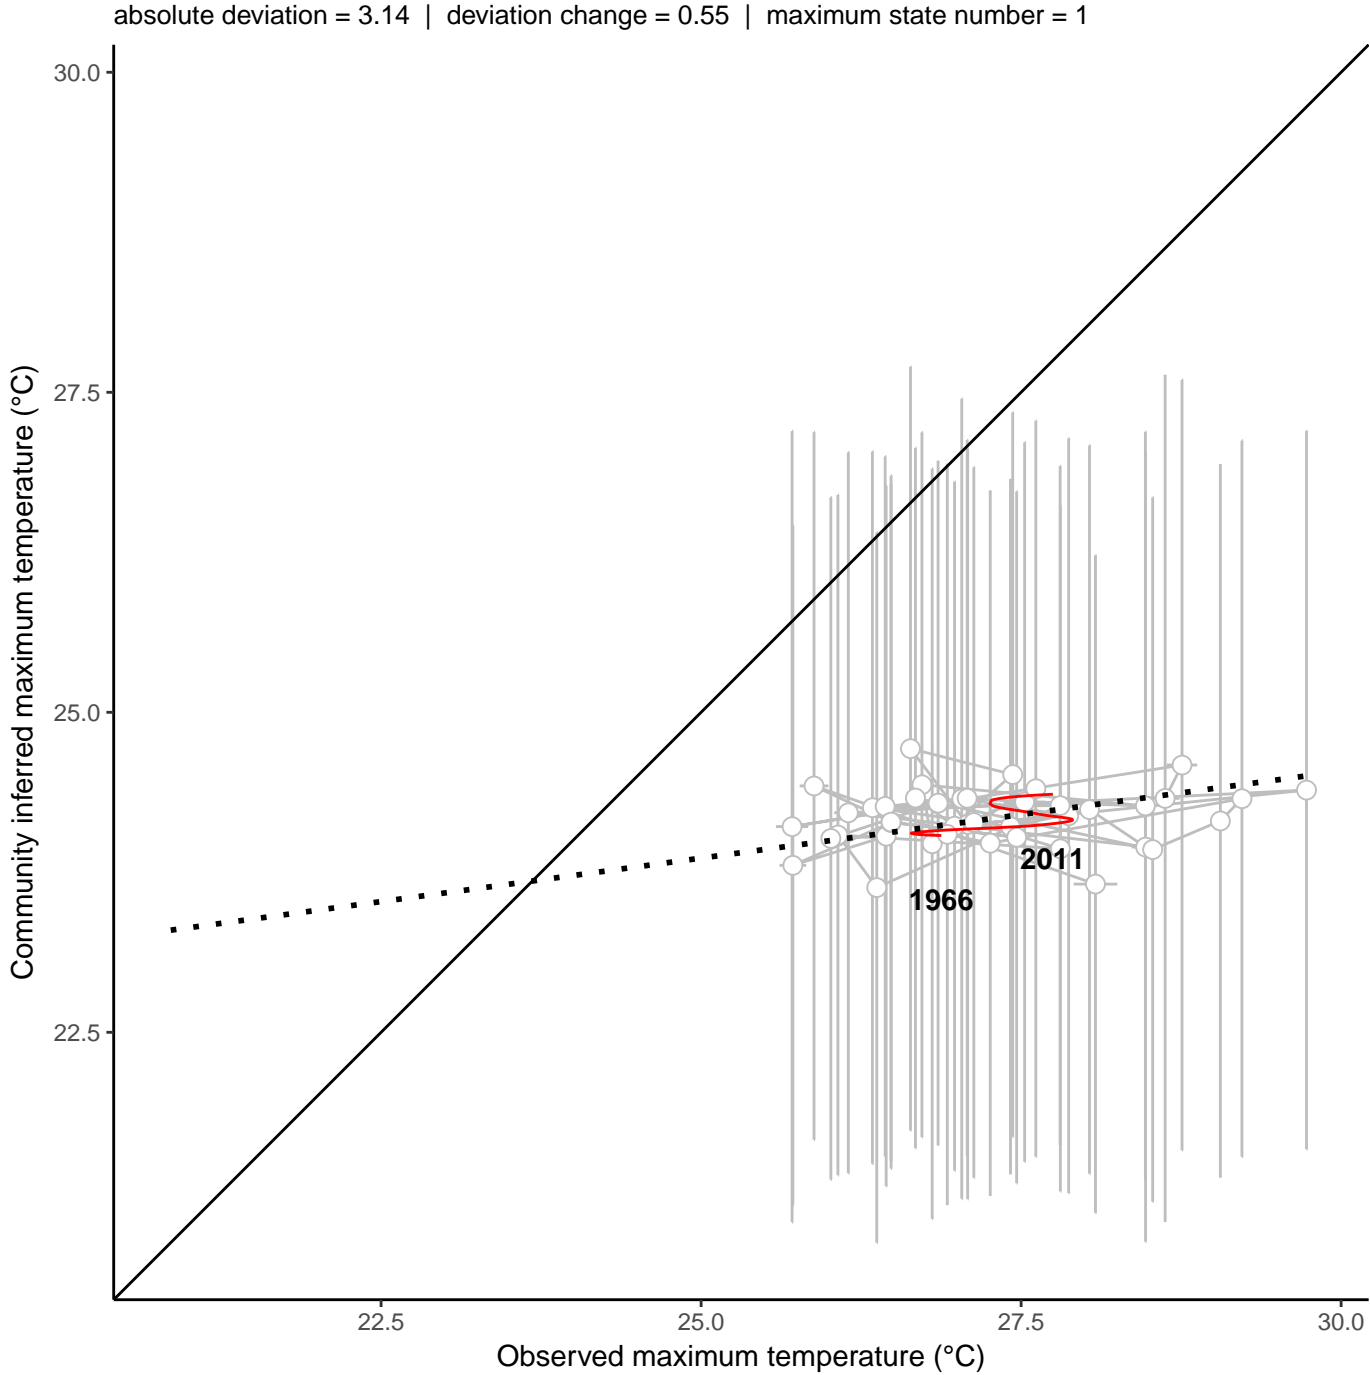

site : 840\_46\_27

absolute deviation = 2.5 | deviation change = 1.03 | maximum state number = 1

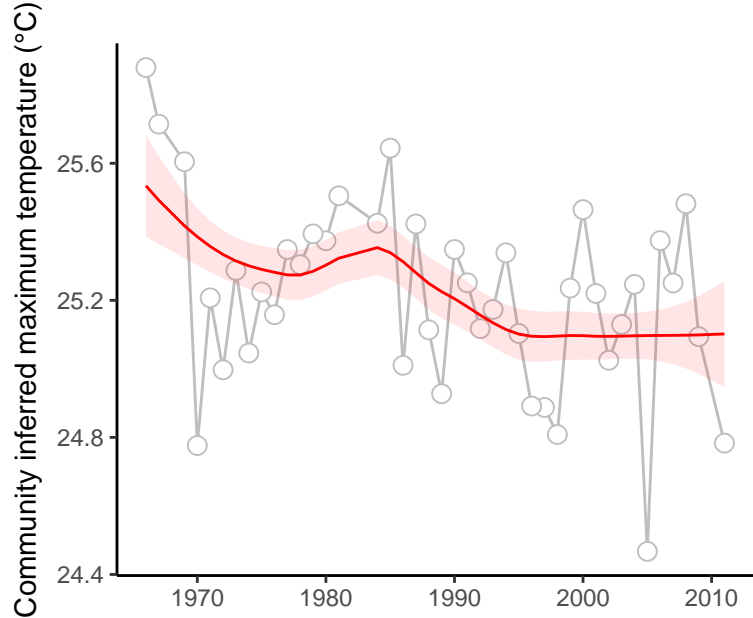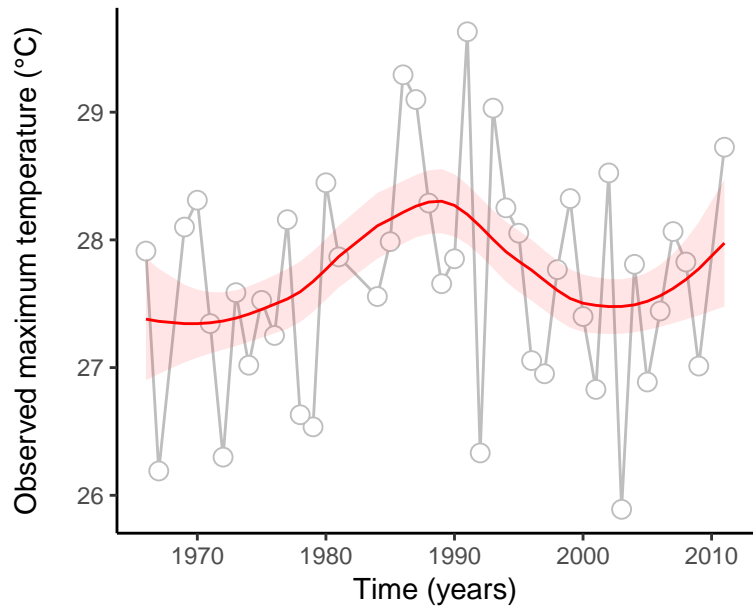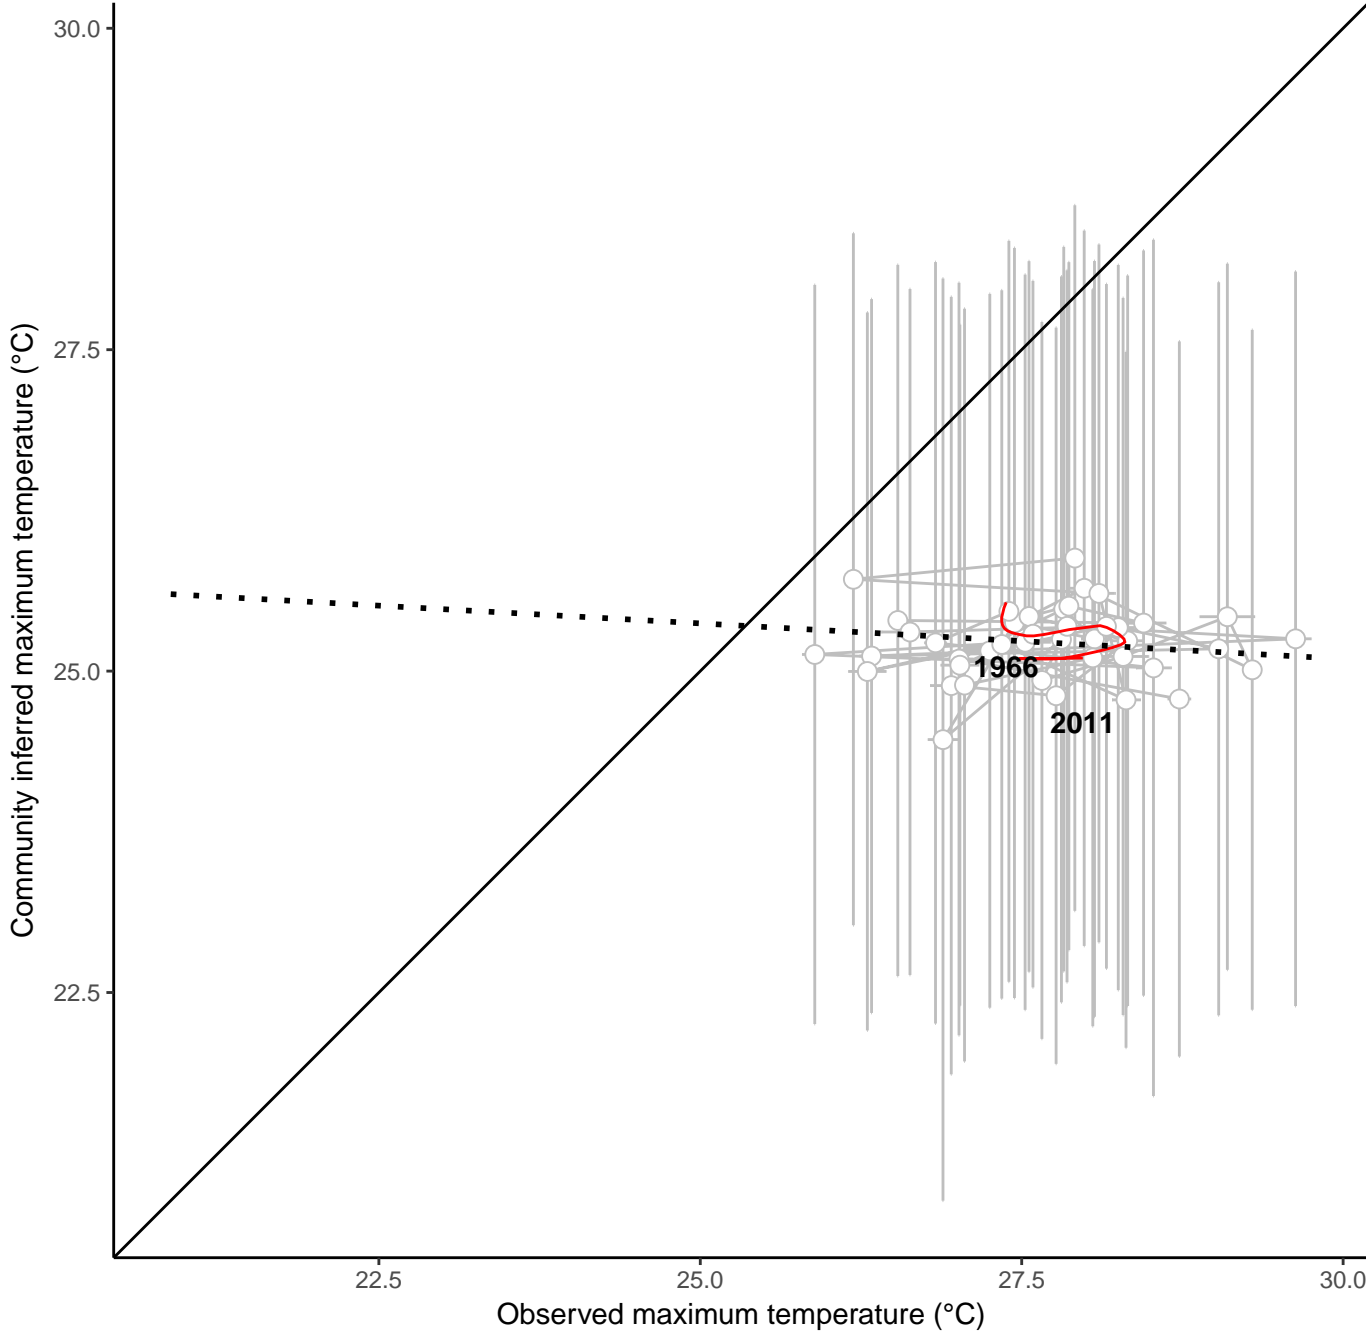

site : 840\_59\_10

absolute deviation = 2.53 | deviation change = 0.64 | maximum state number = 1

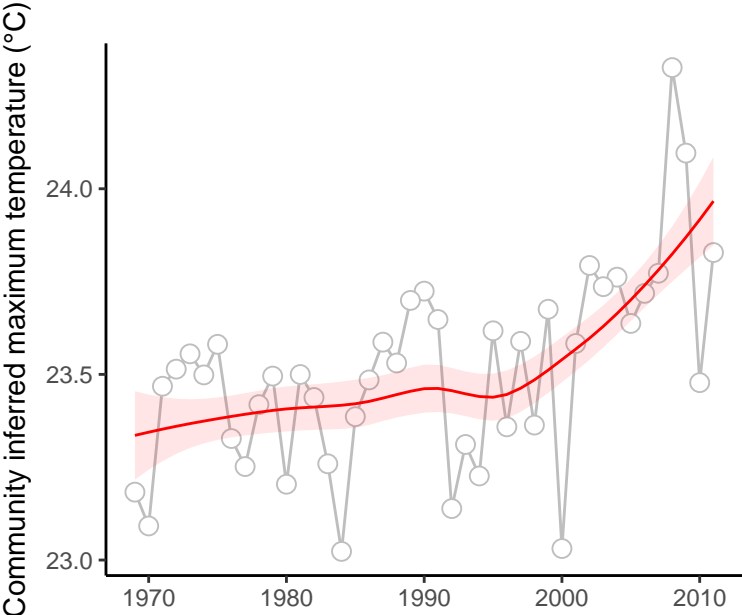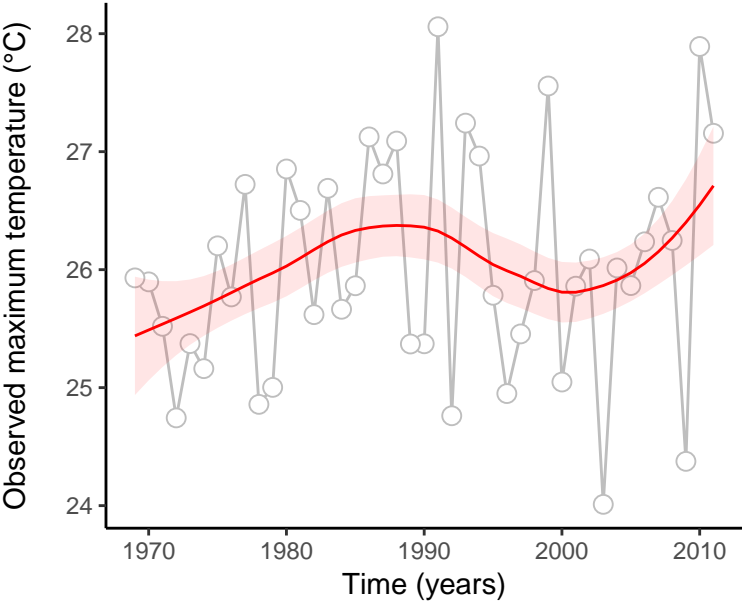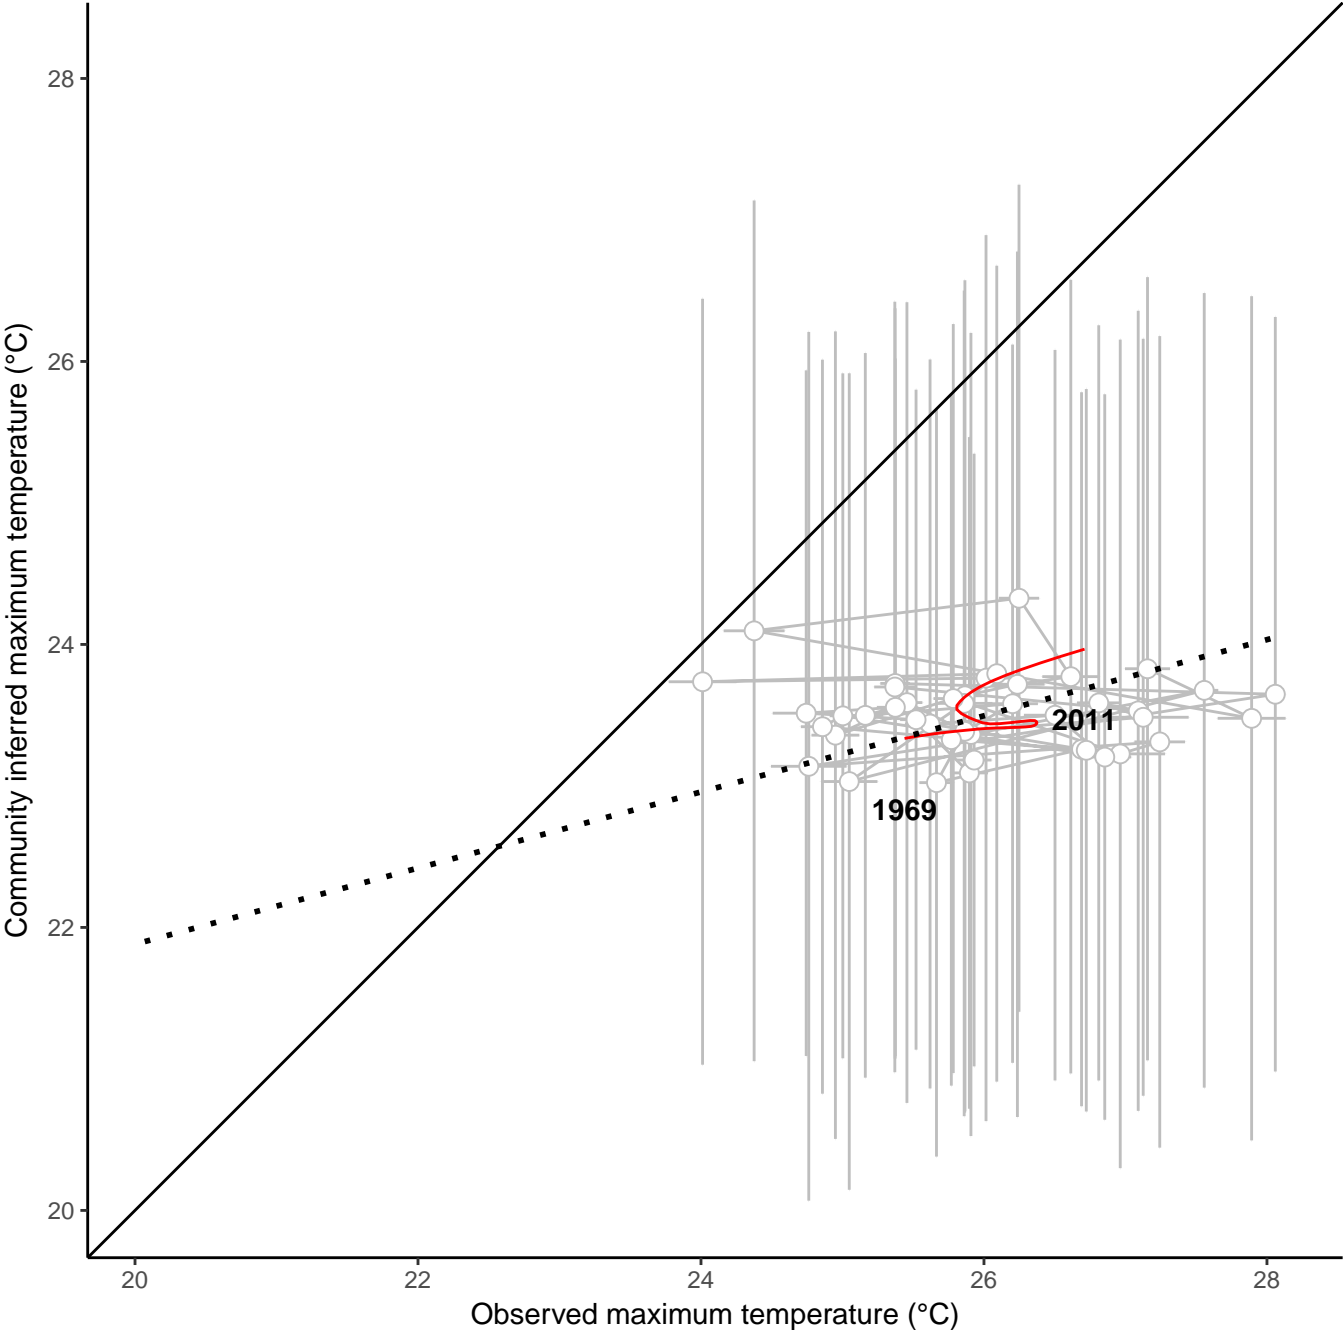

site : 840\_59\_13

absolute deviation = 2.23 | deviation change = 1.72 | maximum state number = 2

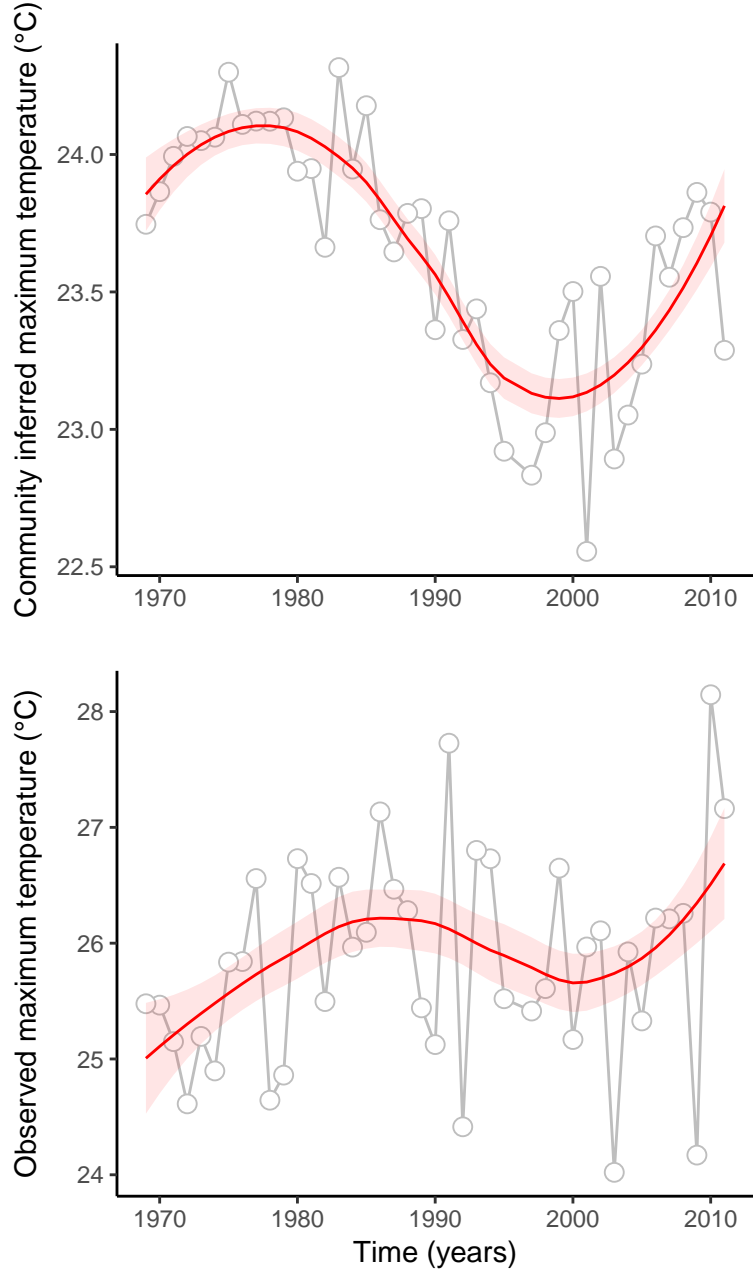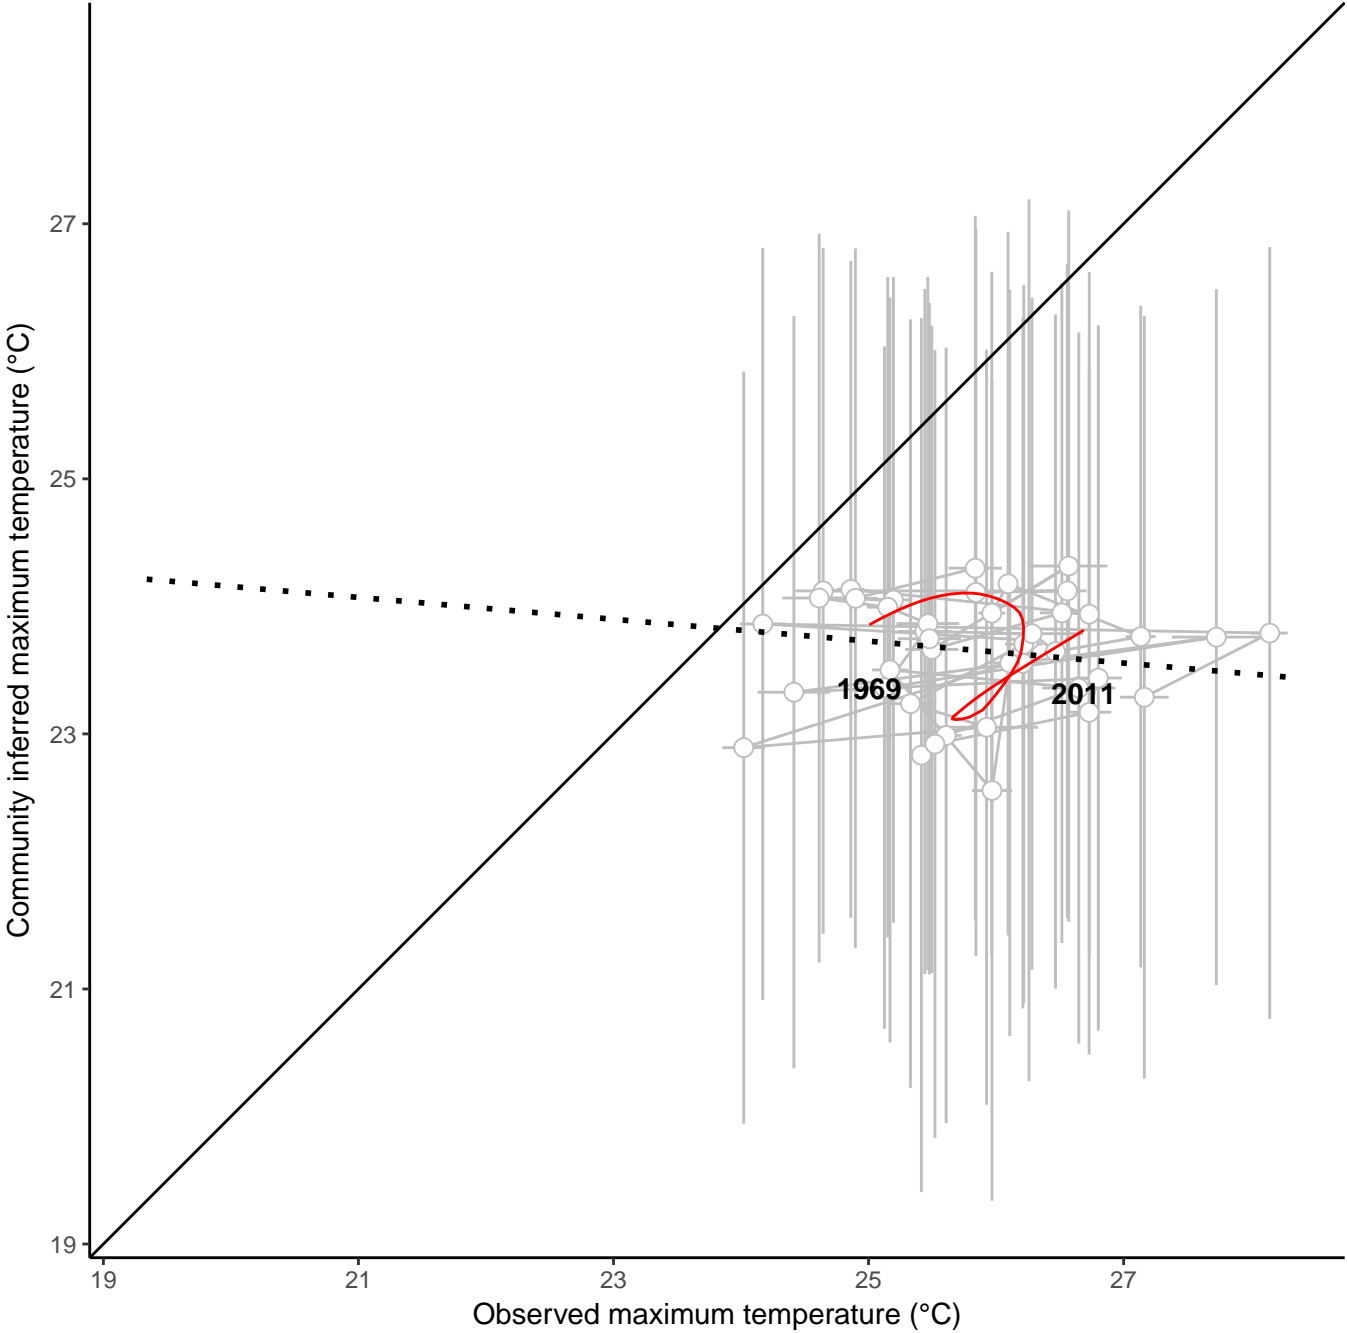



site : 840\_66\_86

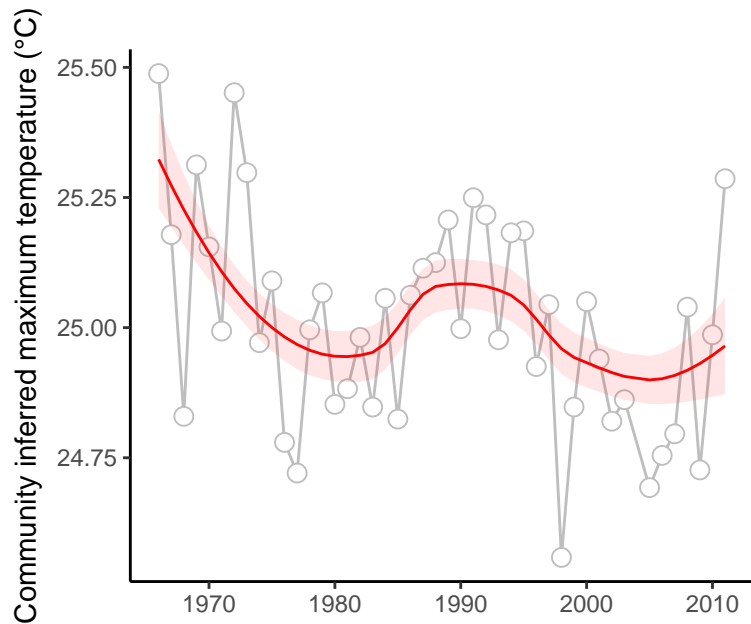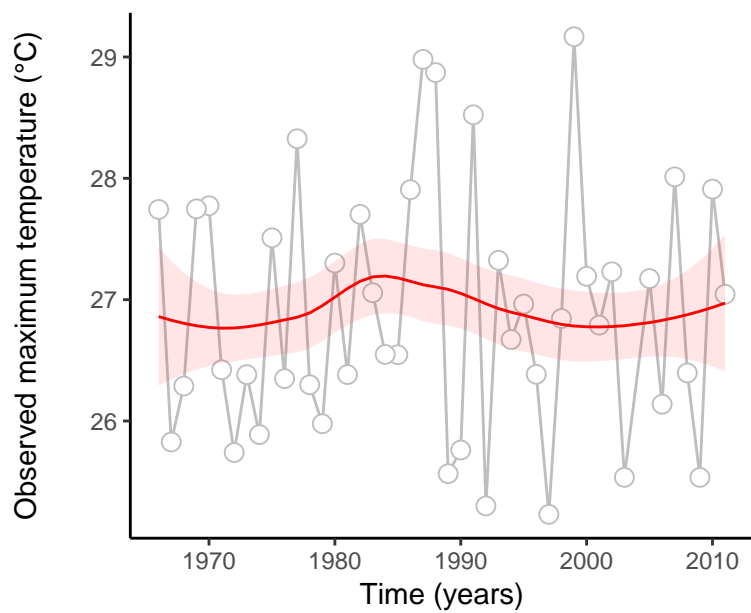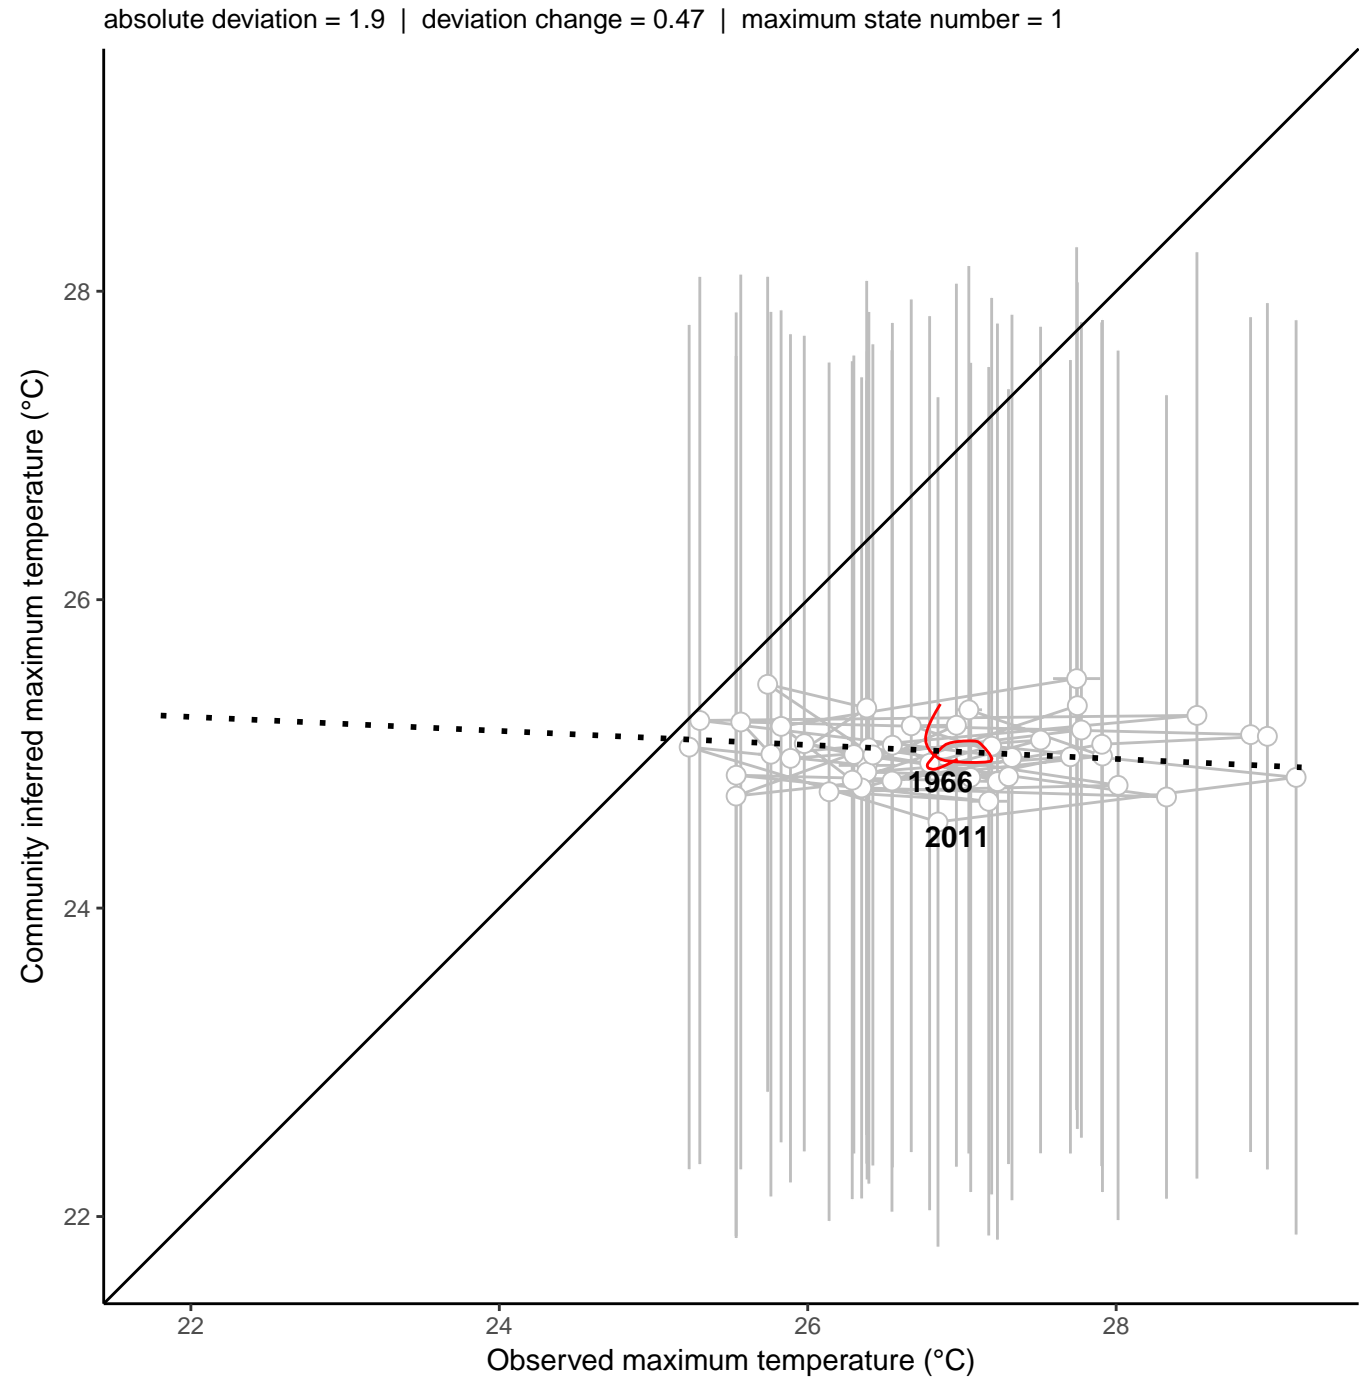

site : 840\_67\_9

absolute deviation = 6.5 | deviation change = 1 | maximum state number = 1

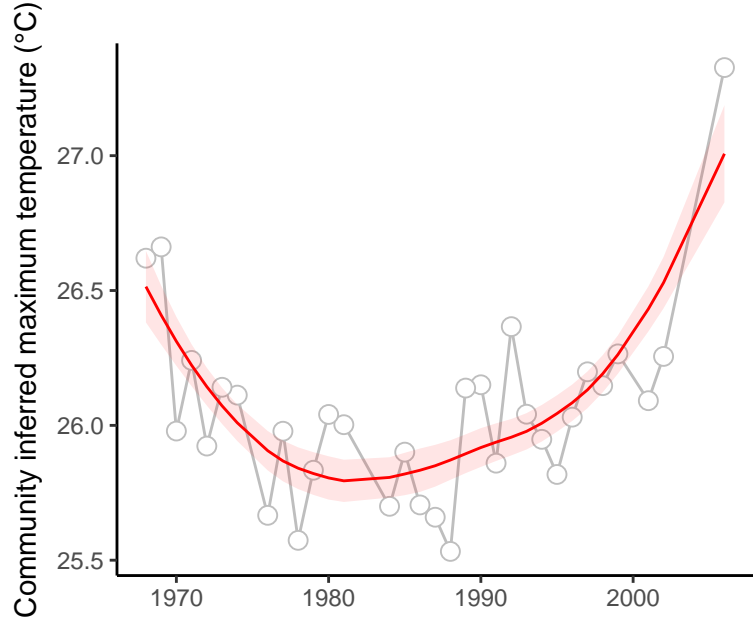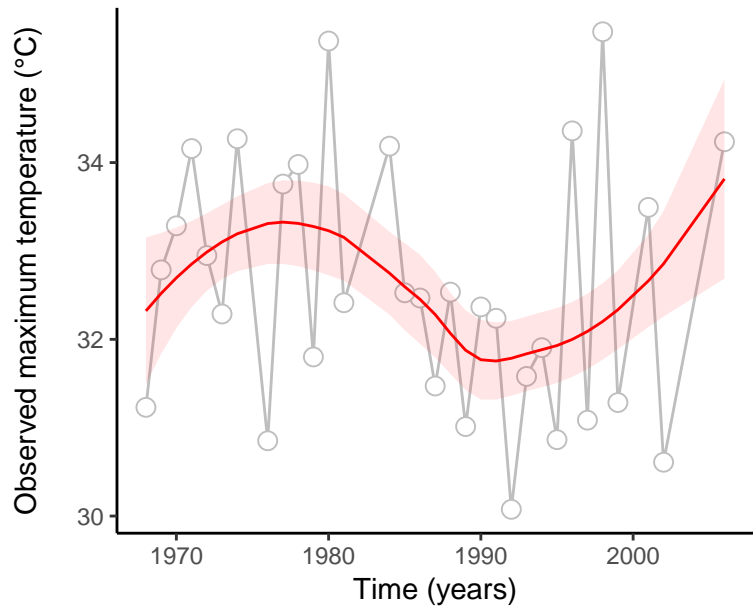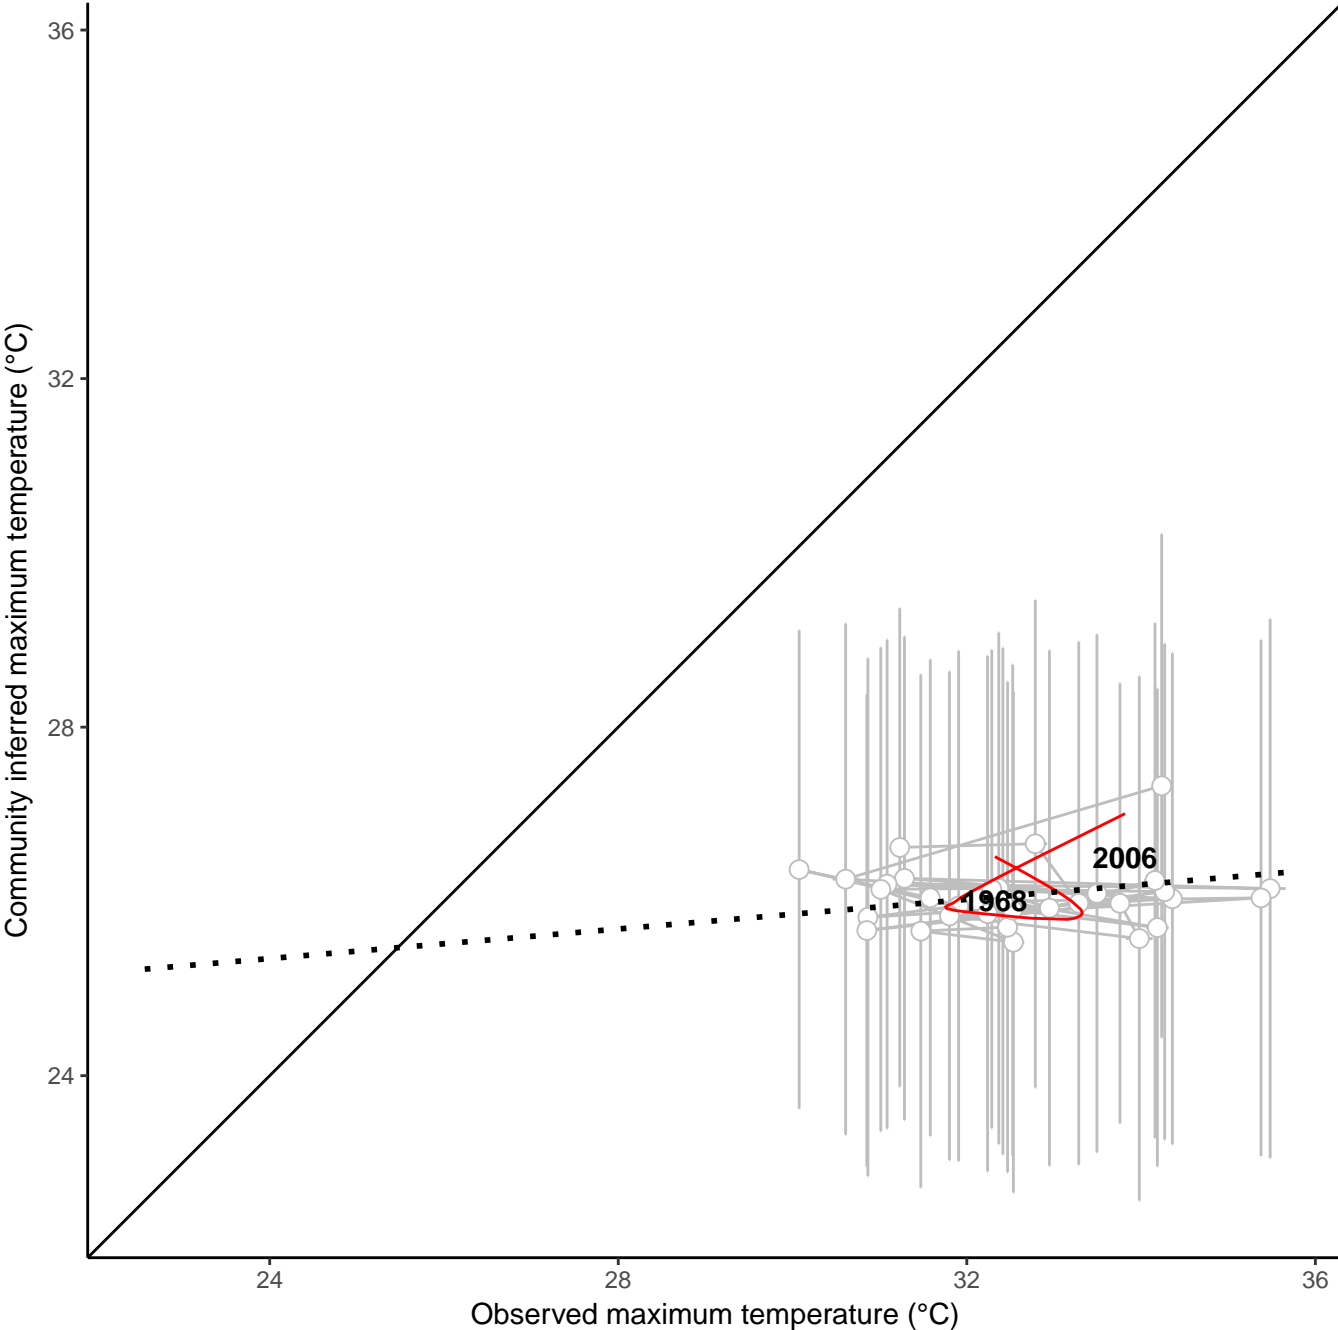

site : 840\_7\_5

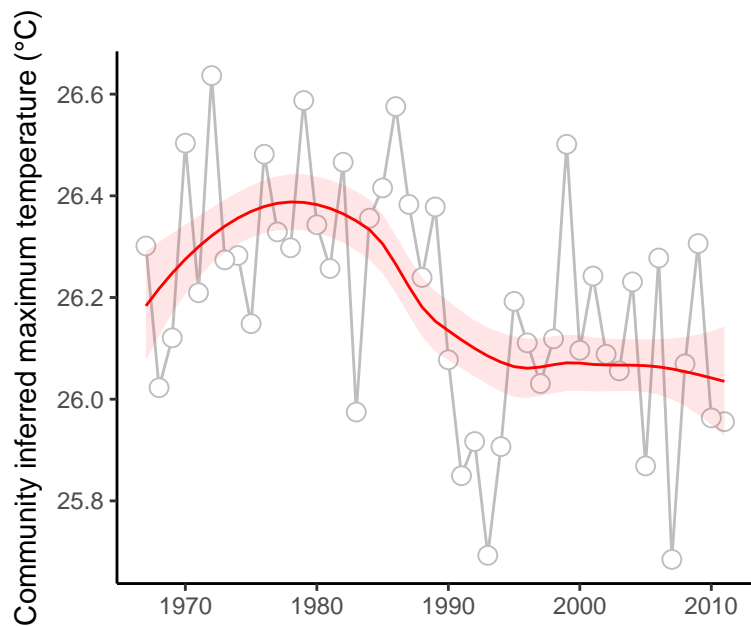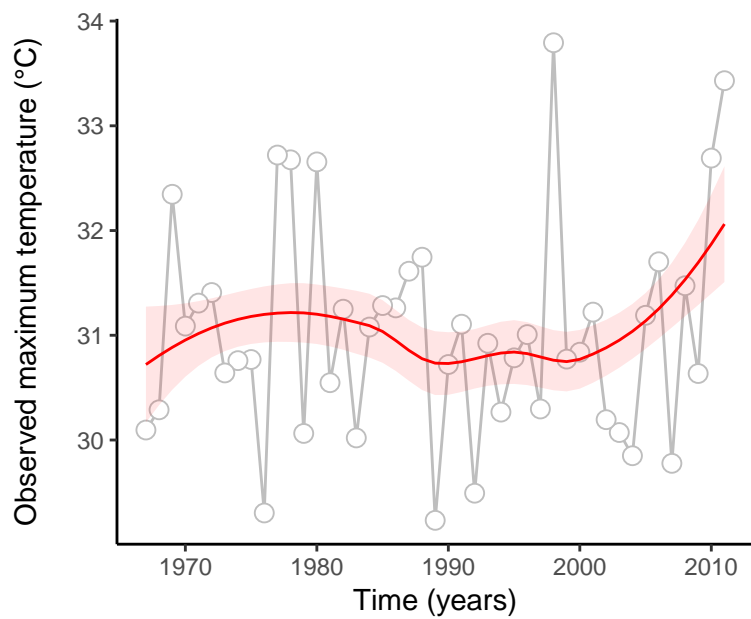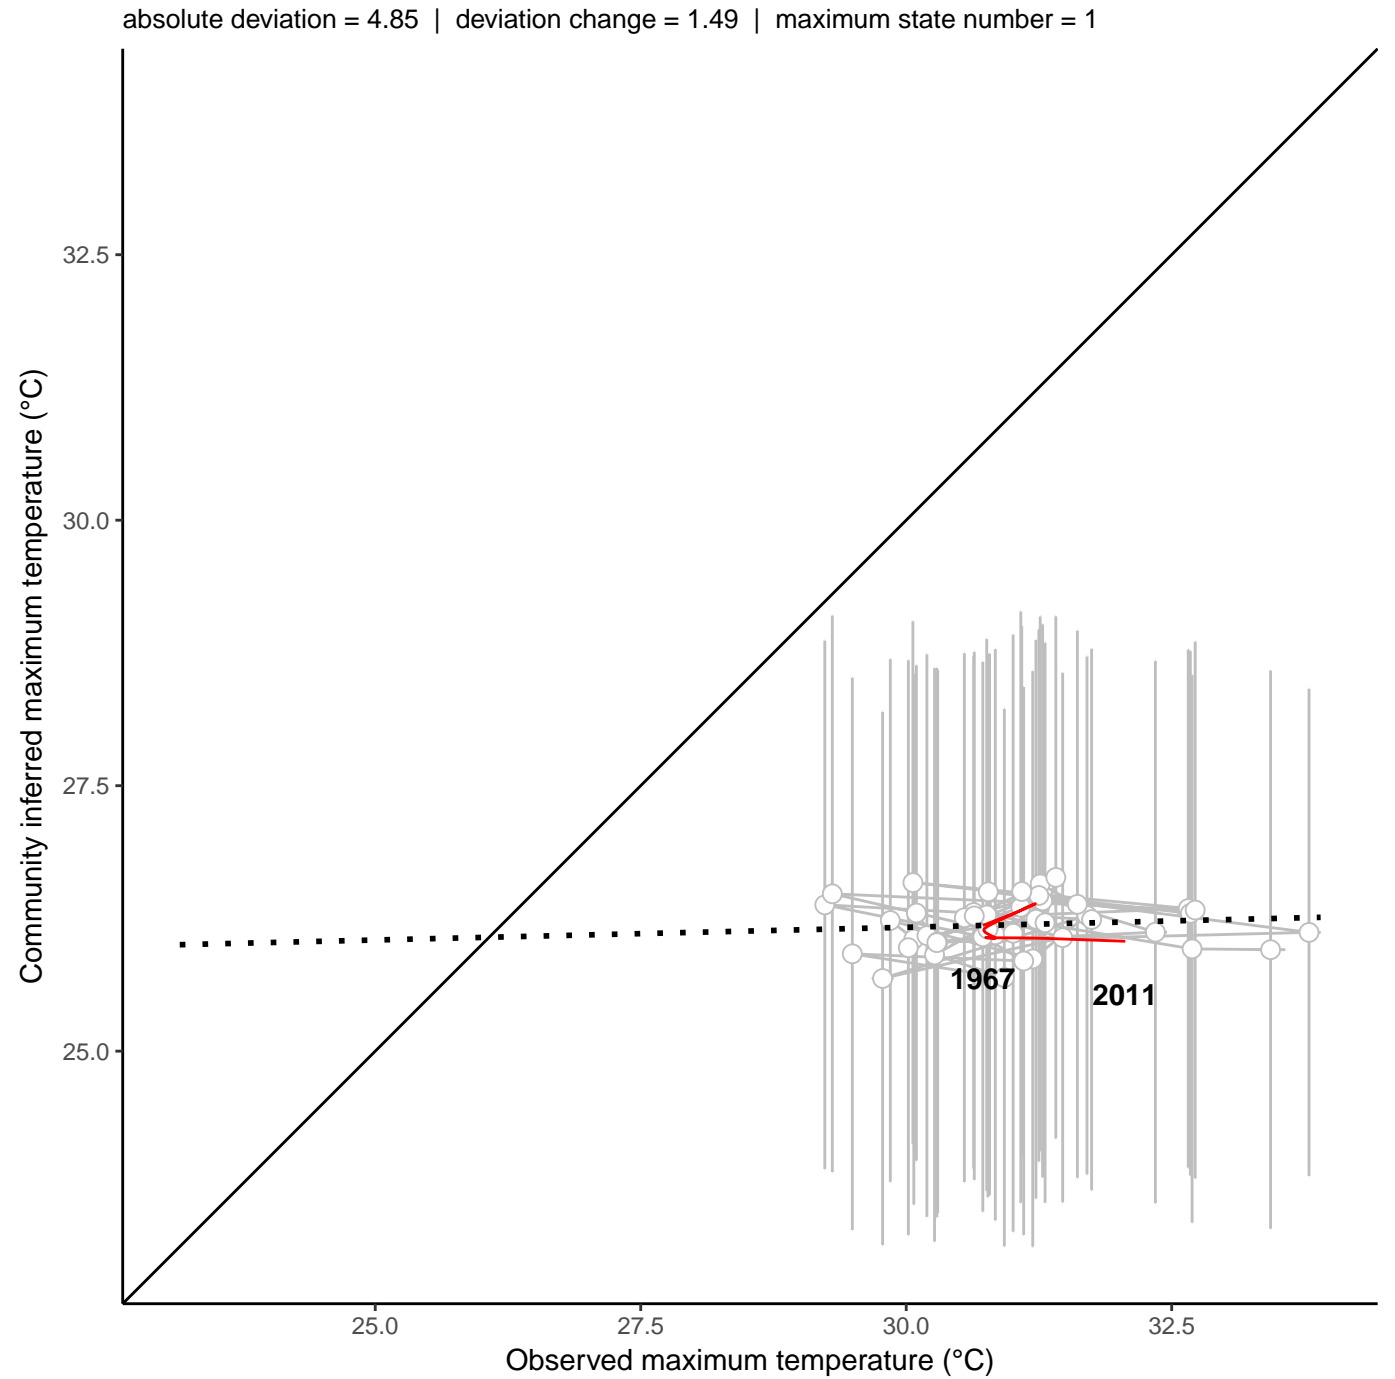

site : 840\_72\_76

absolute deviation = 2.51 | deviation change = 1.4 | maximum state number = 1

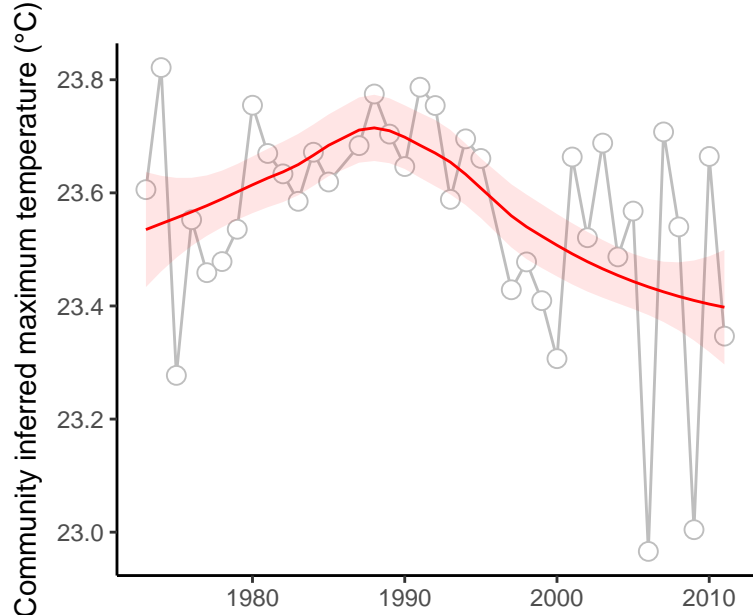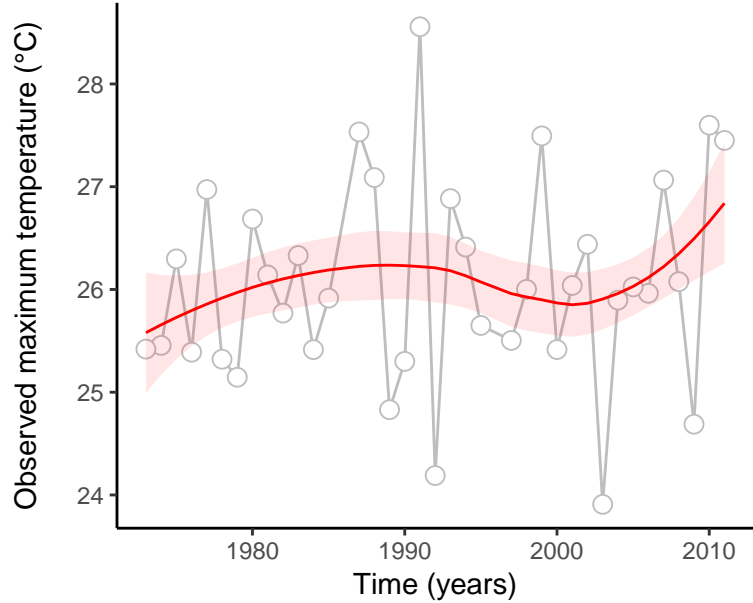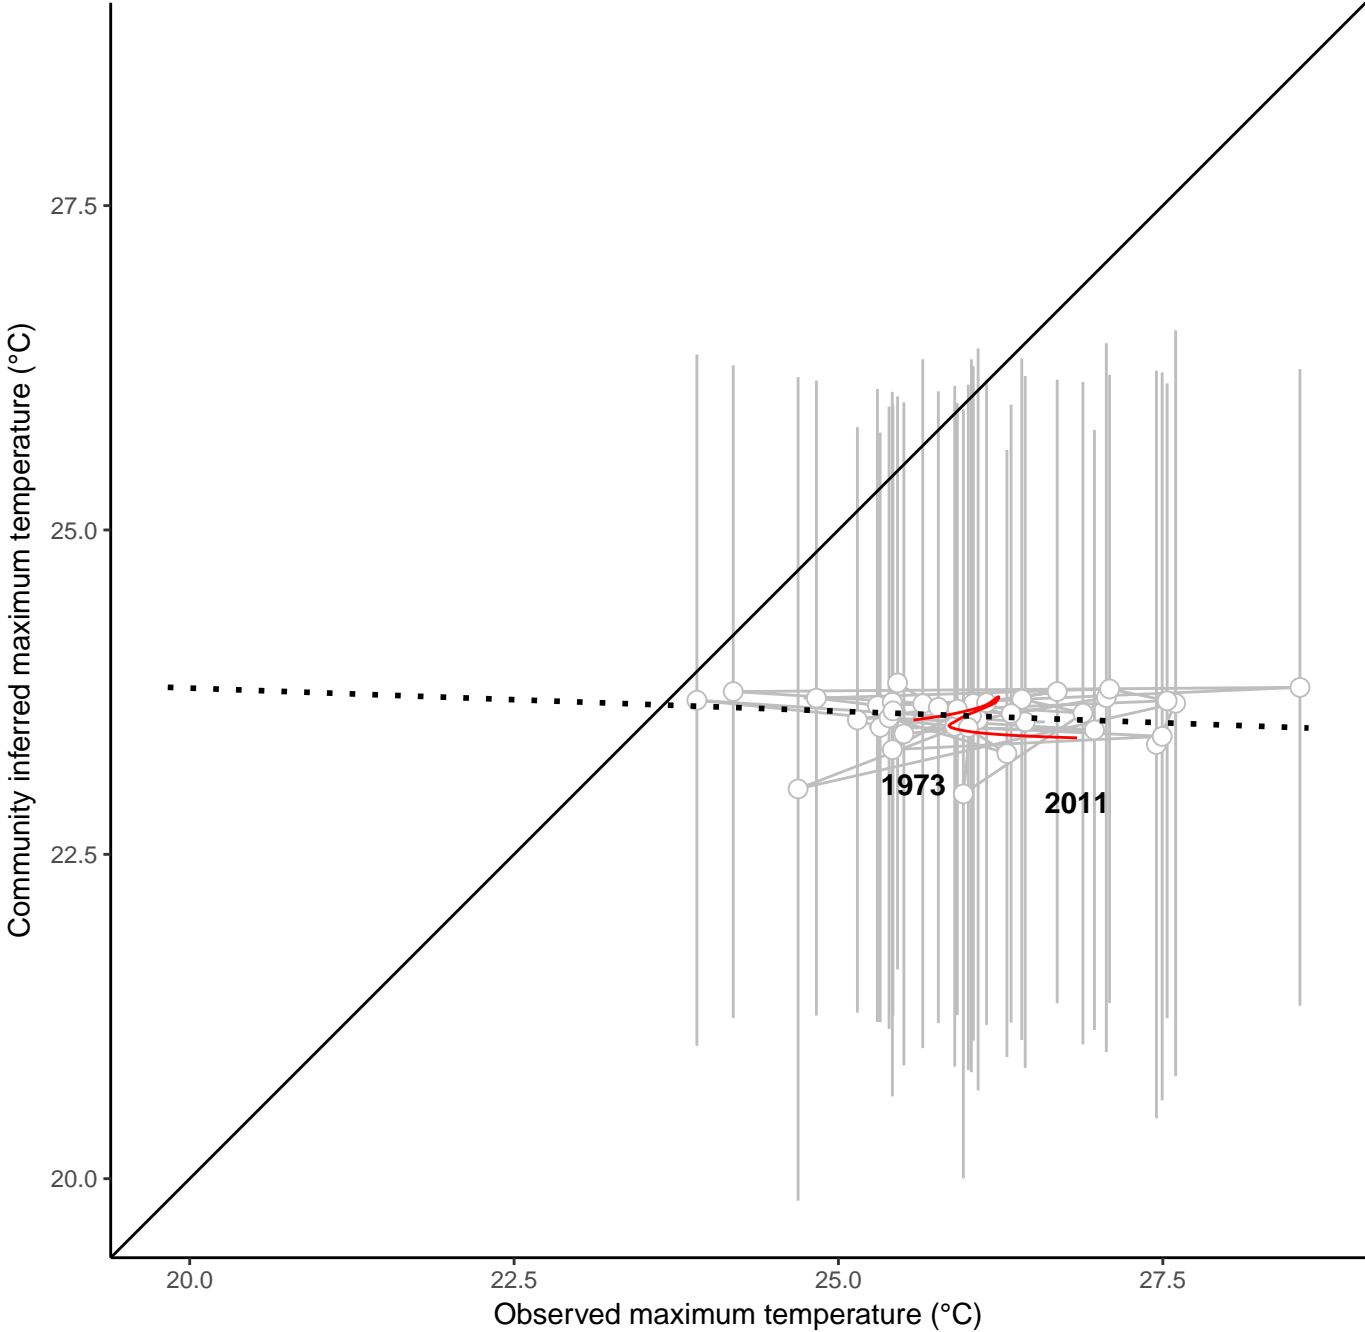

site : 840\_82\_17

absolute deviation = 3.23 | deviation change = 0.77 | maximum state number = 1

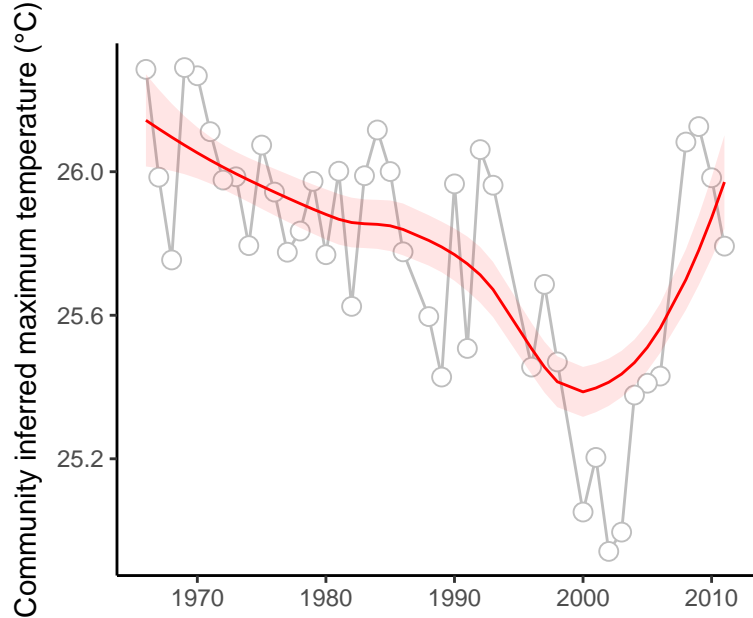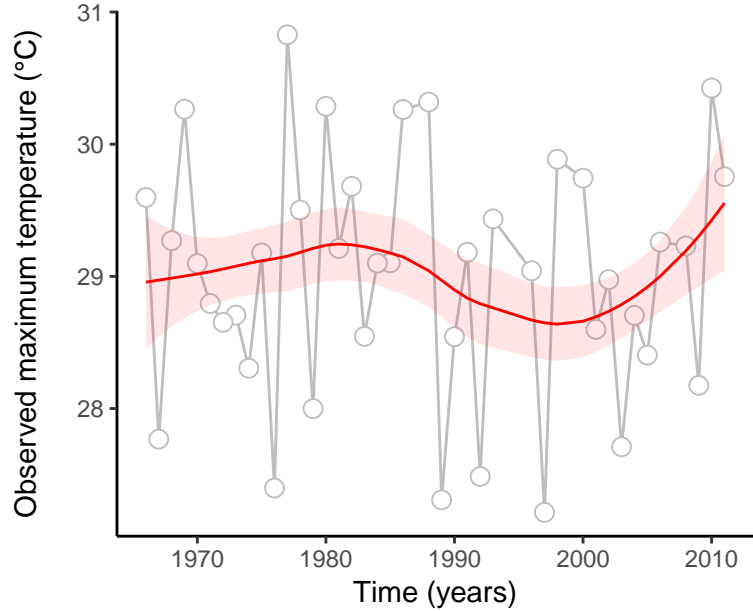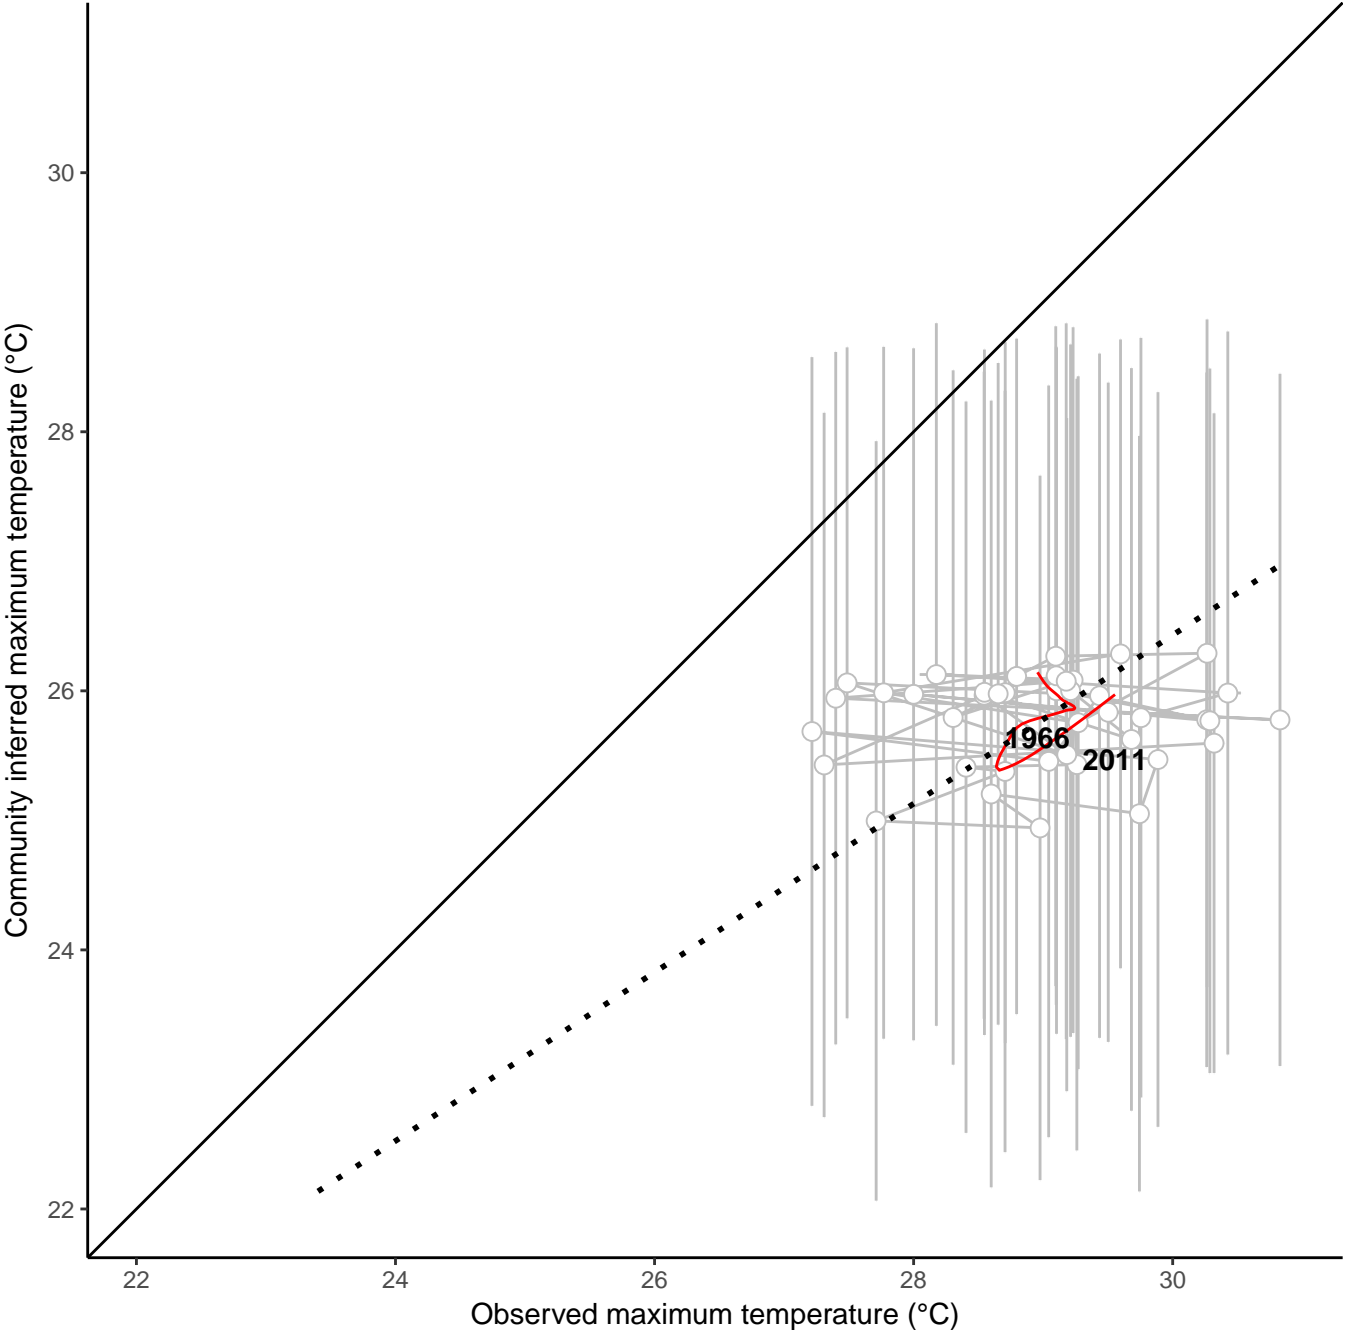

site : 840\_83\_43

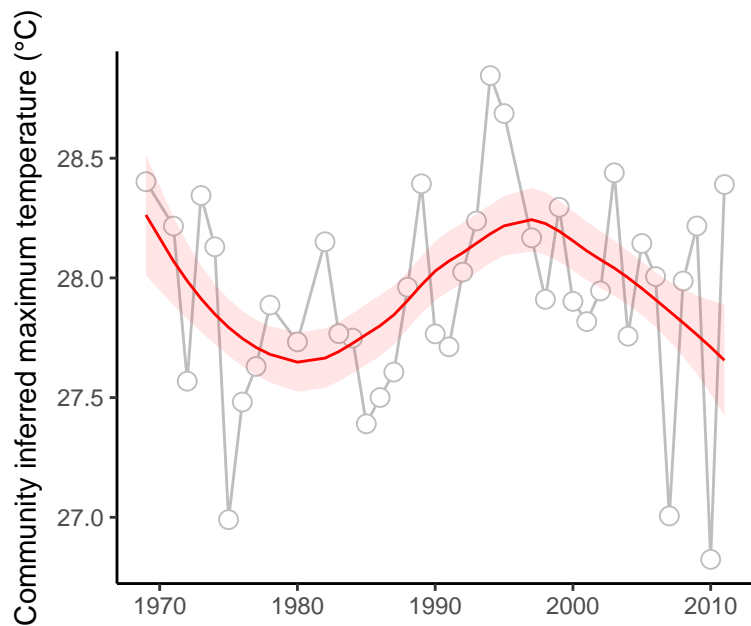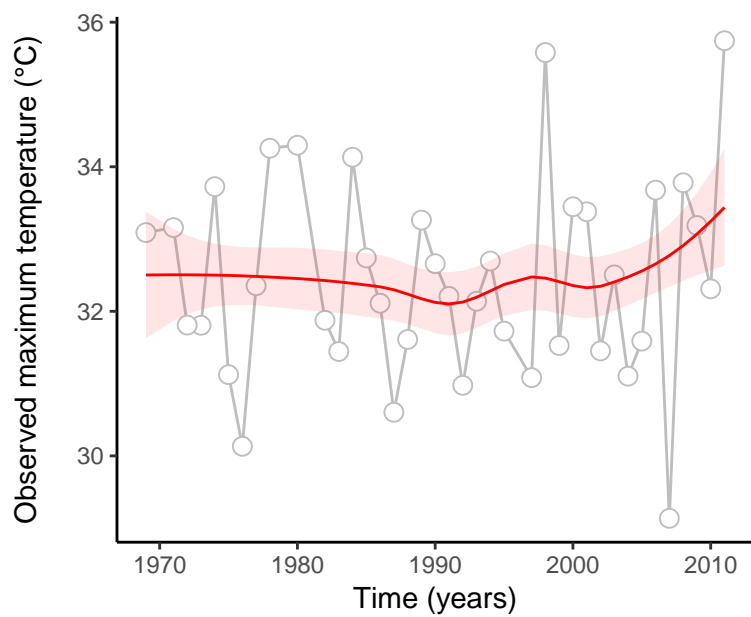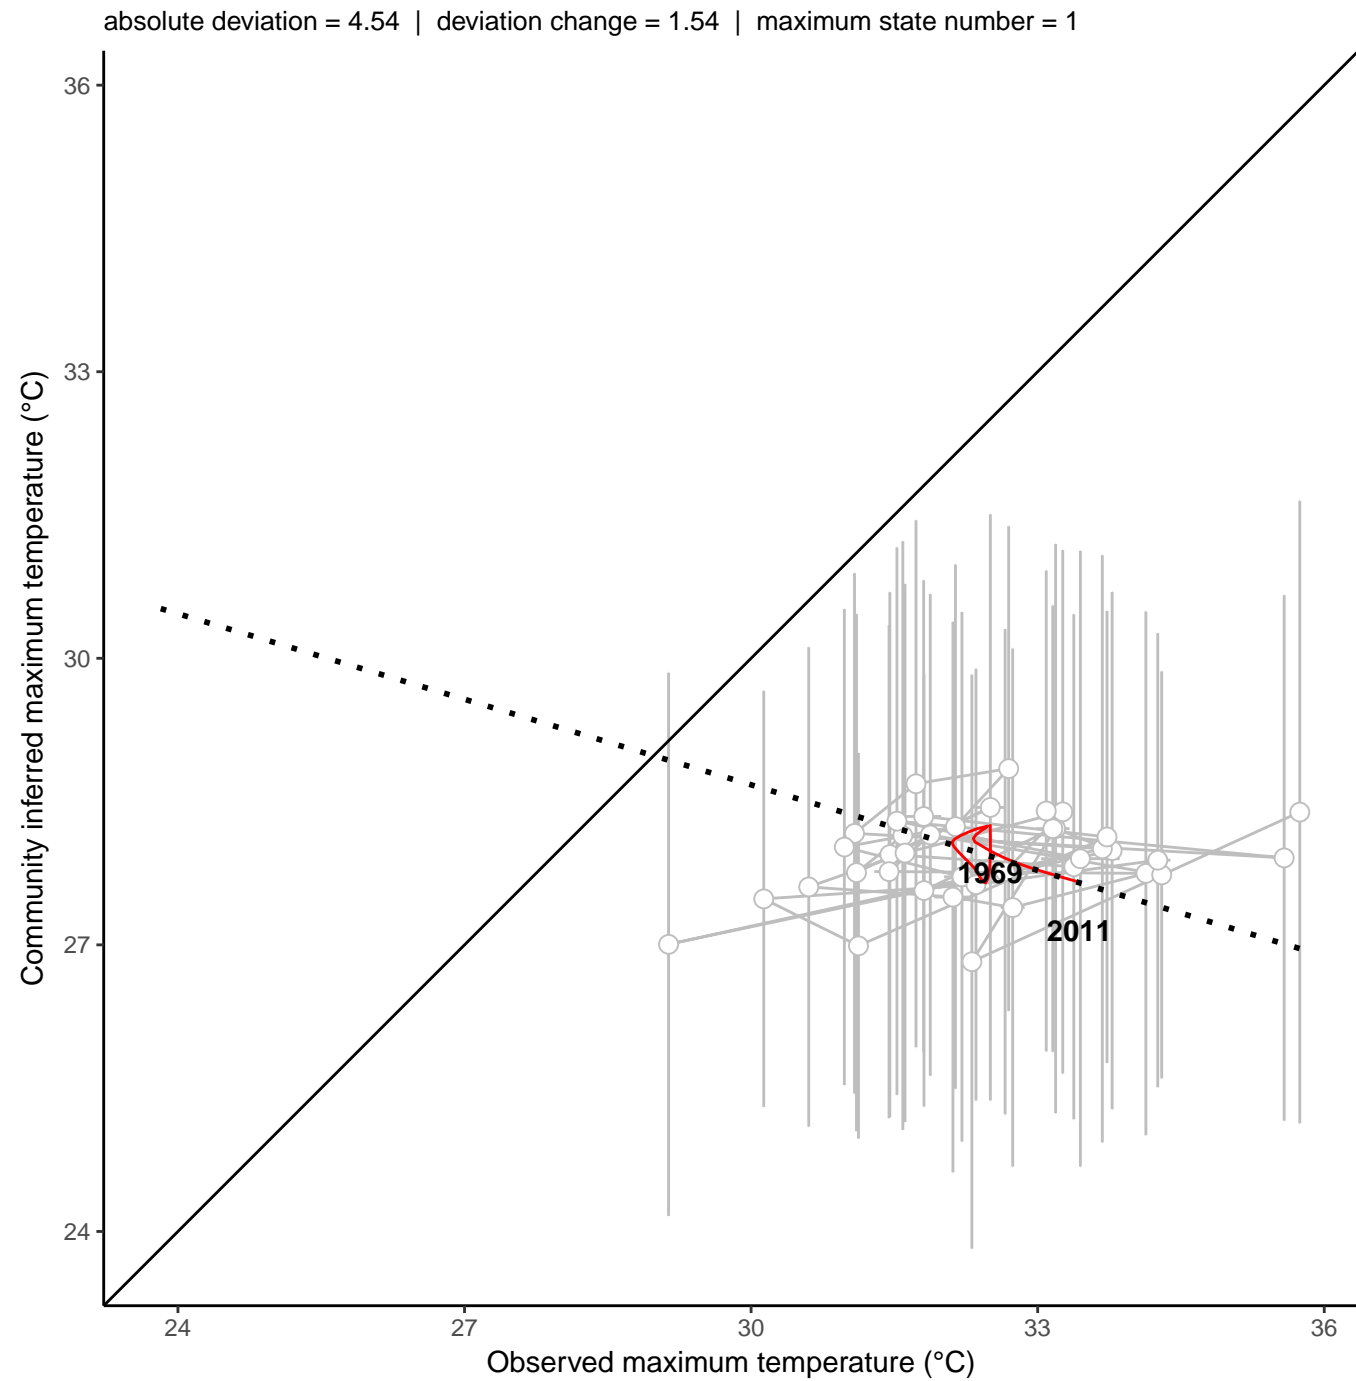

site : 840\_88\_2

absolute deviation = 2.96 | deviation change = 1.41 | maximum state number = 1

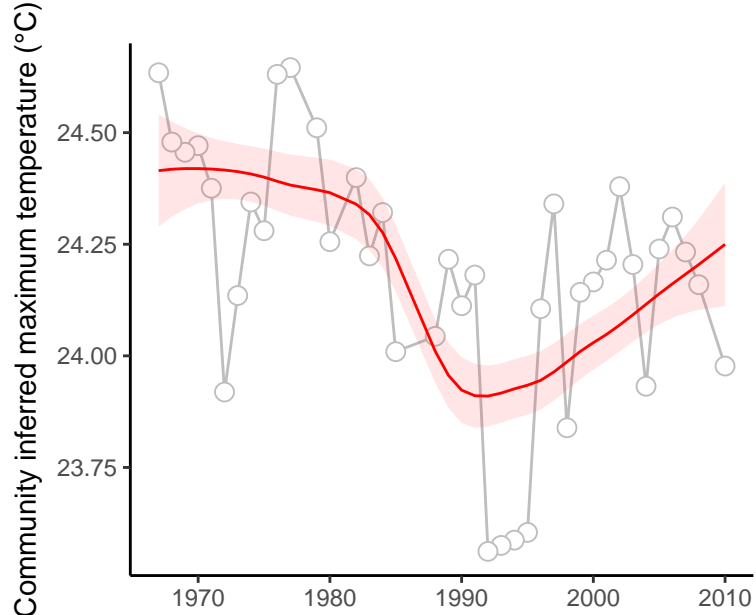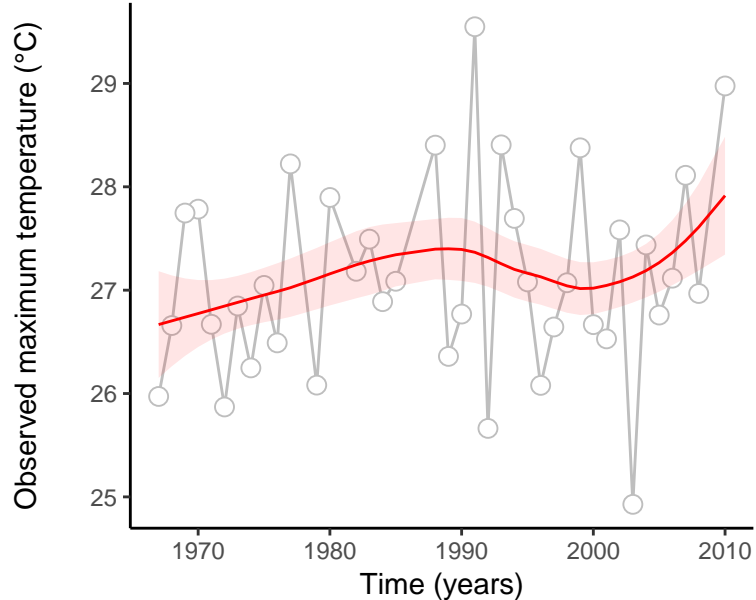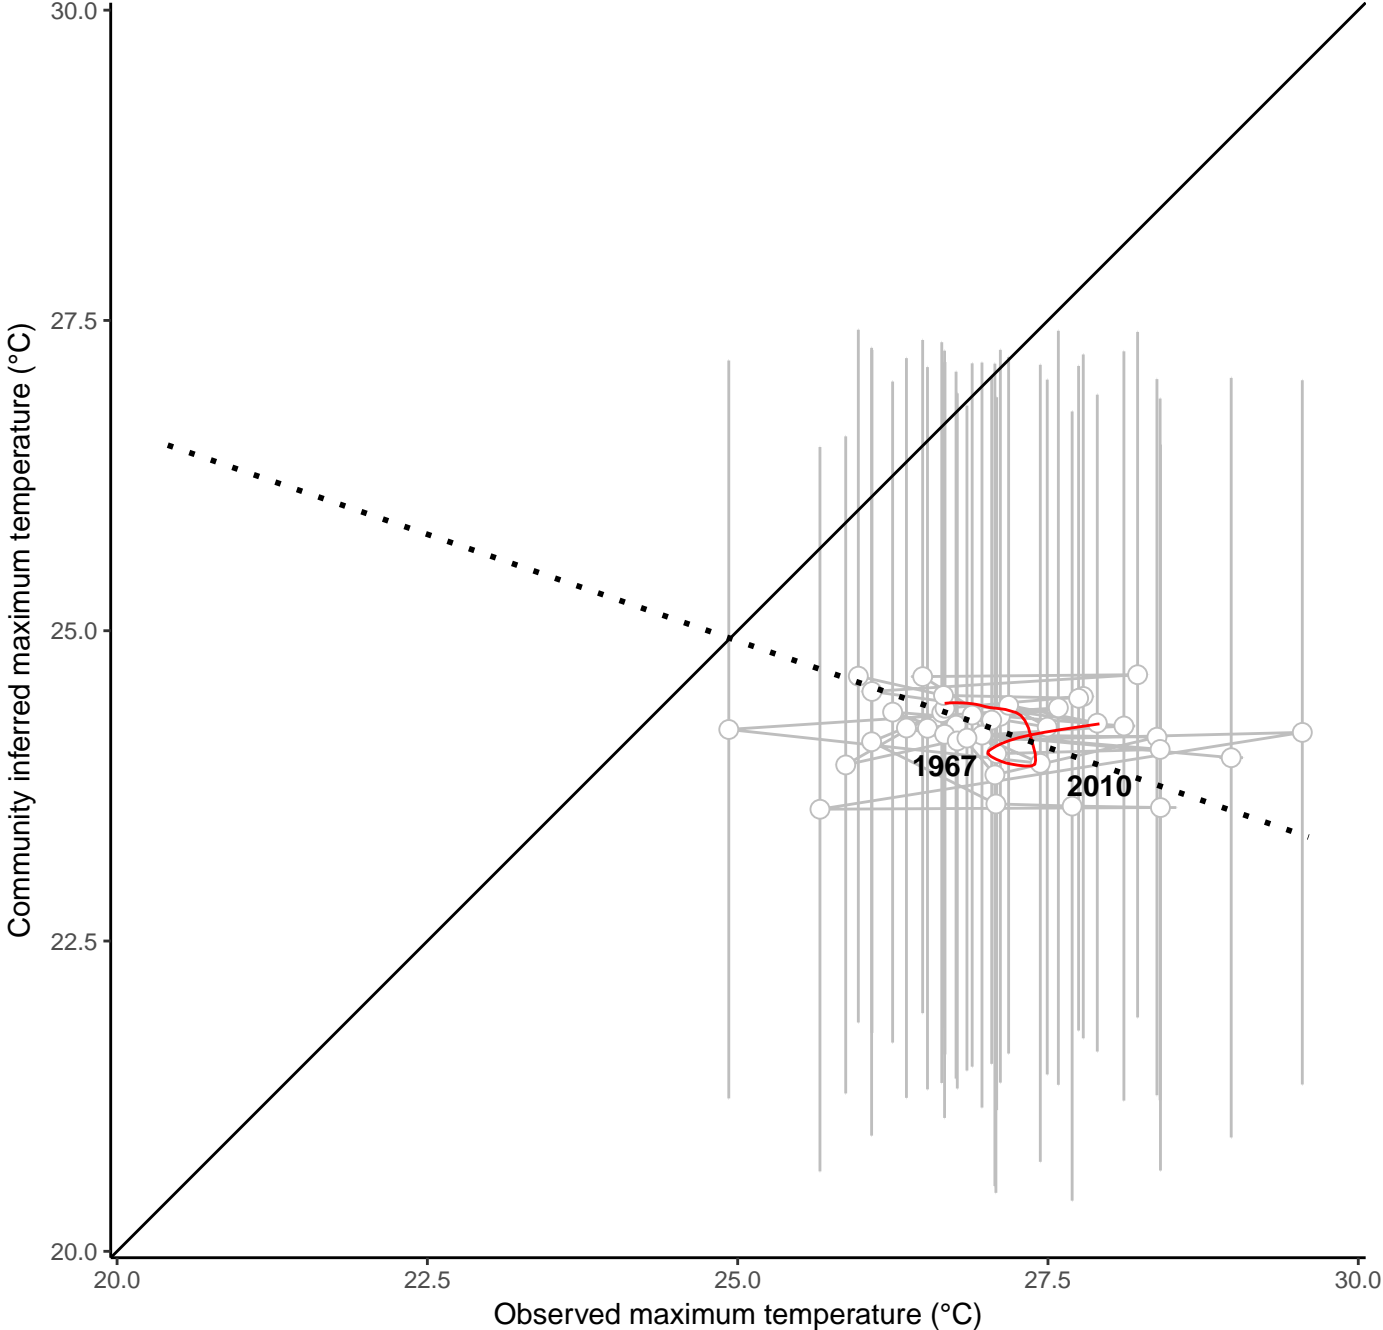

site : 840\_14\_156

absolute deviation = 1.41 | deviation change = -0.62 | maximum state number = 1

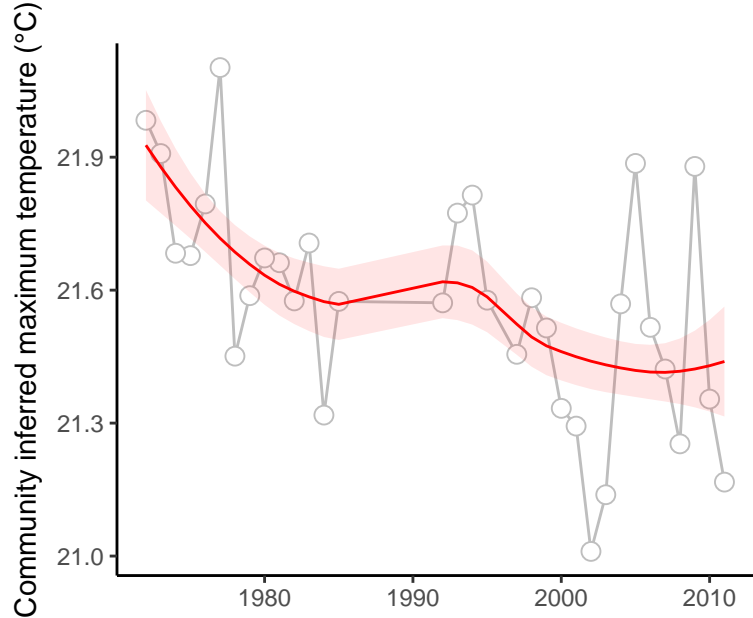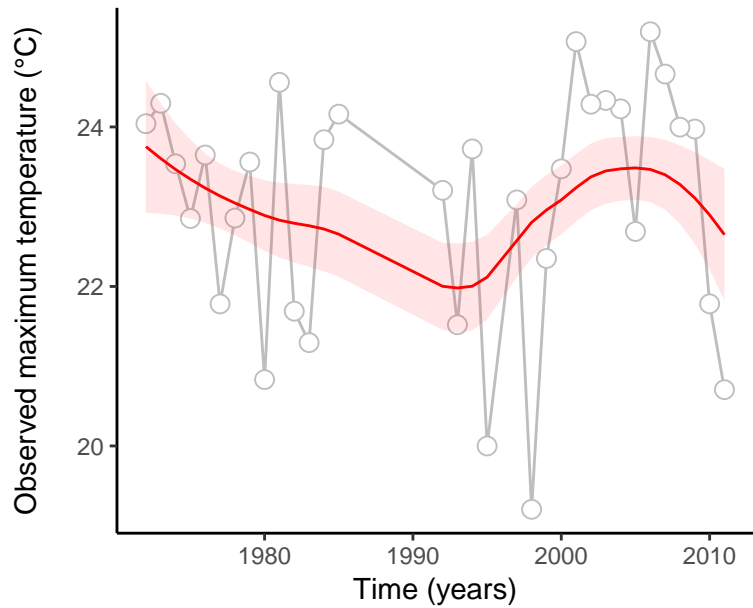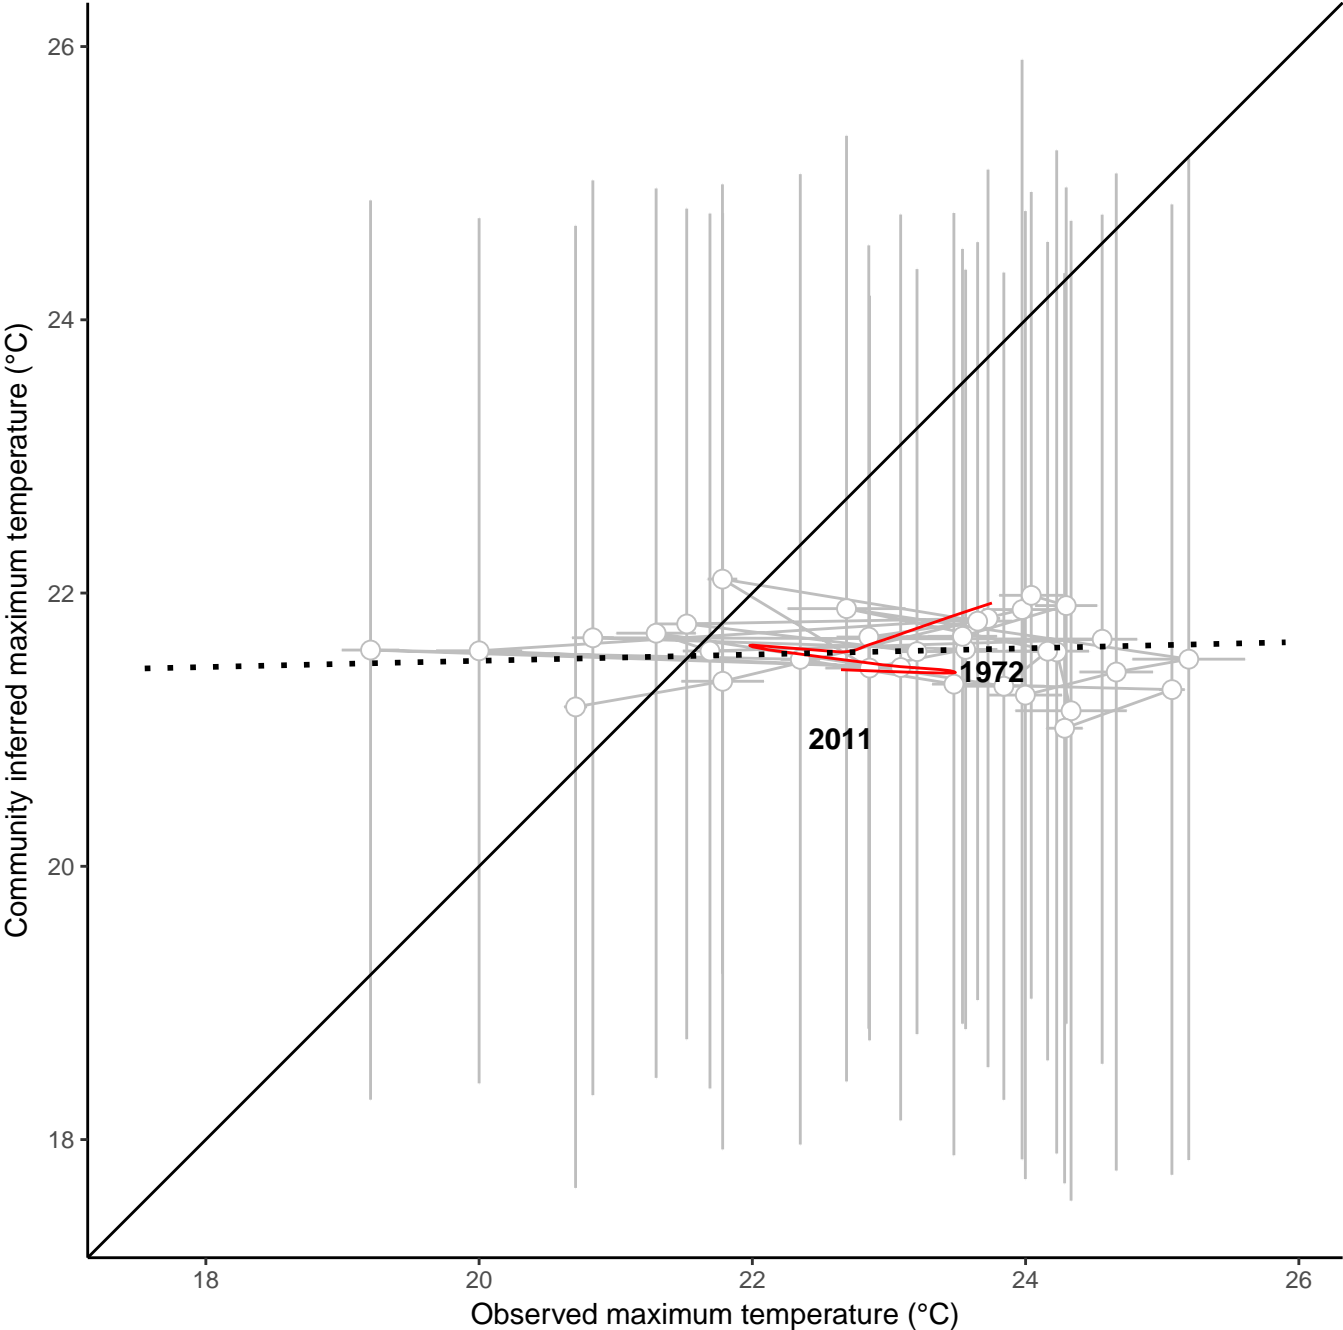



site : 840\_14\_159

absolute deviation = 6.27 | deviation change = -1.44 | maximum state number = 1

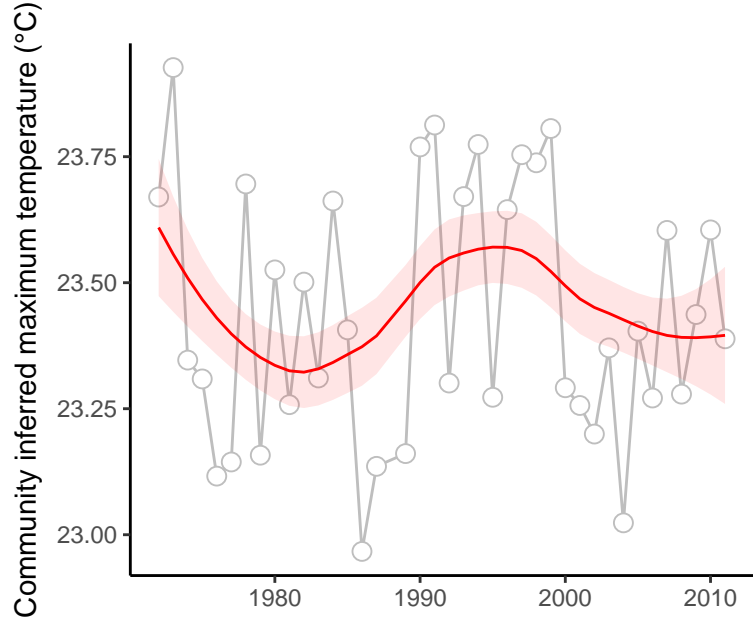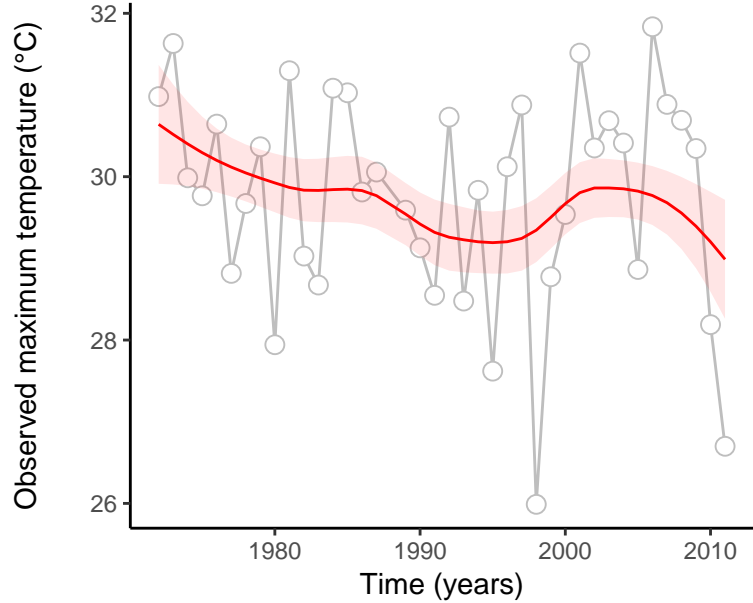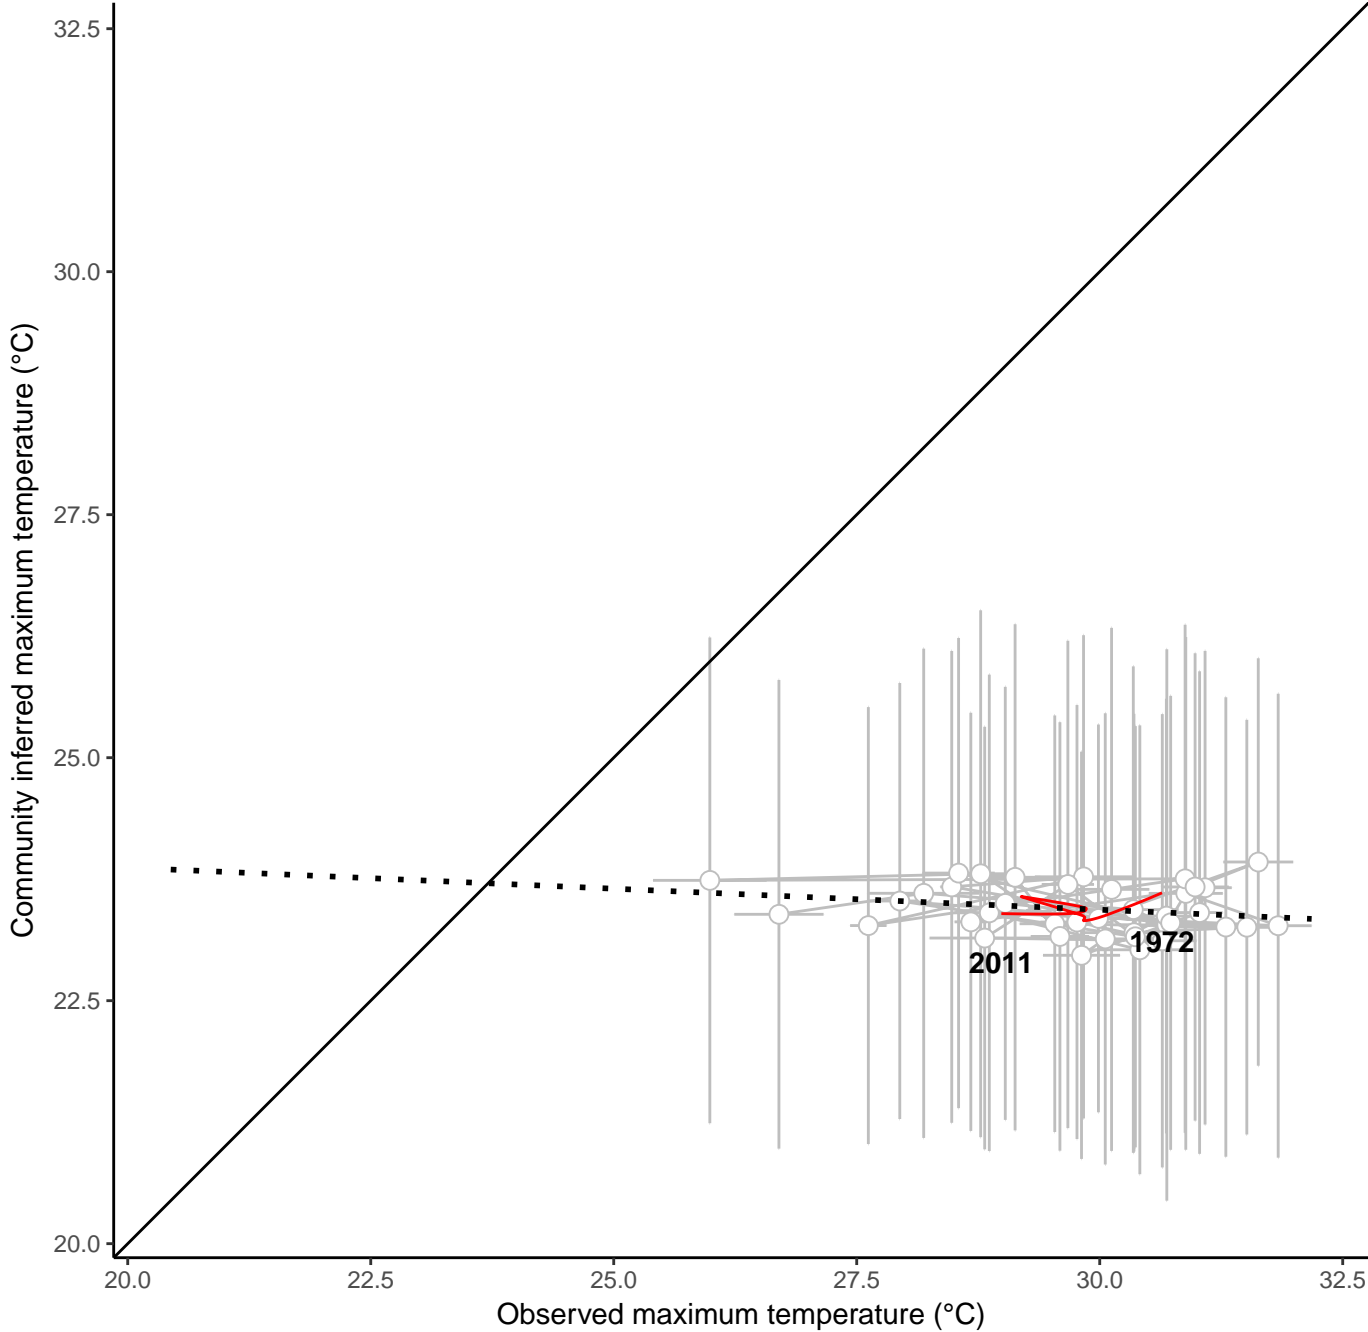

site : 840\_2\_12

absolute deviation = 3.14 | deviation change = 0.69 | maximum state number = 1

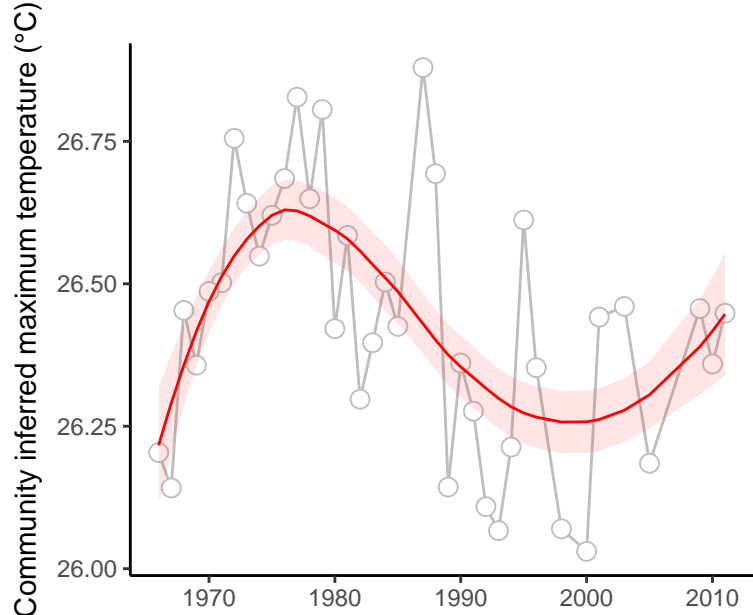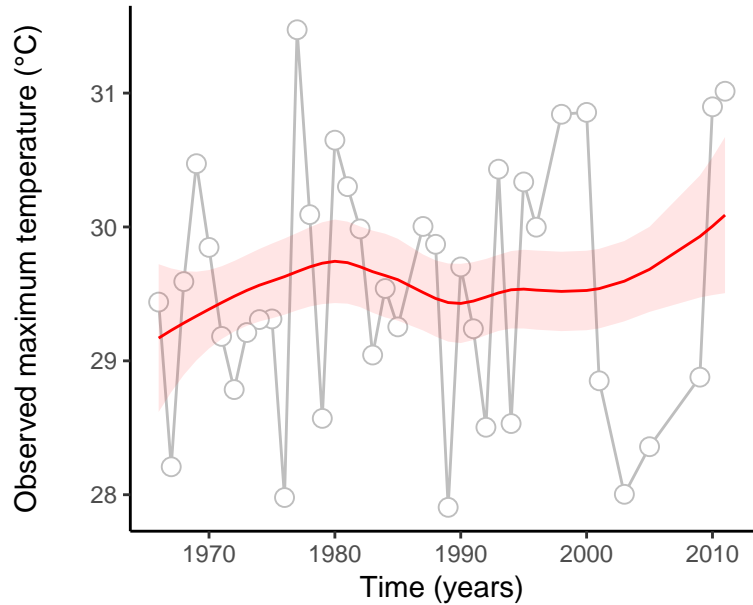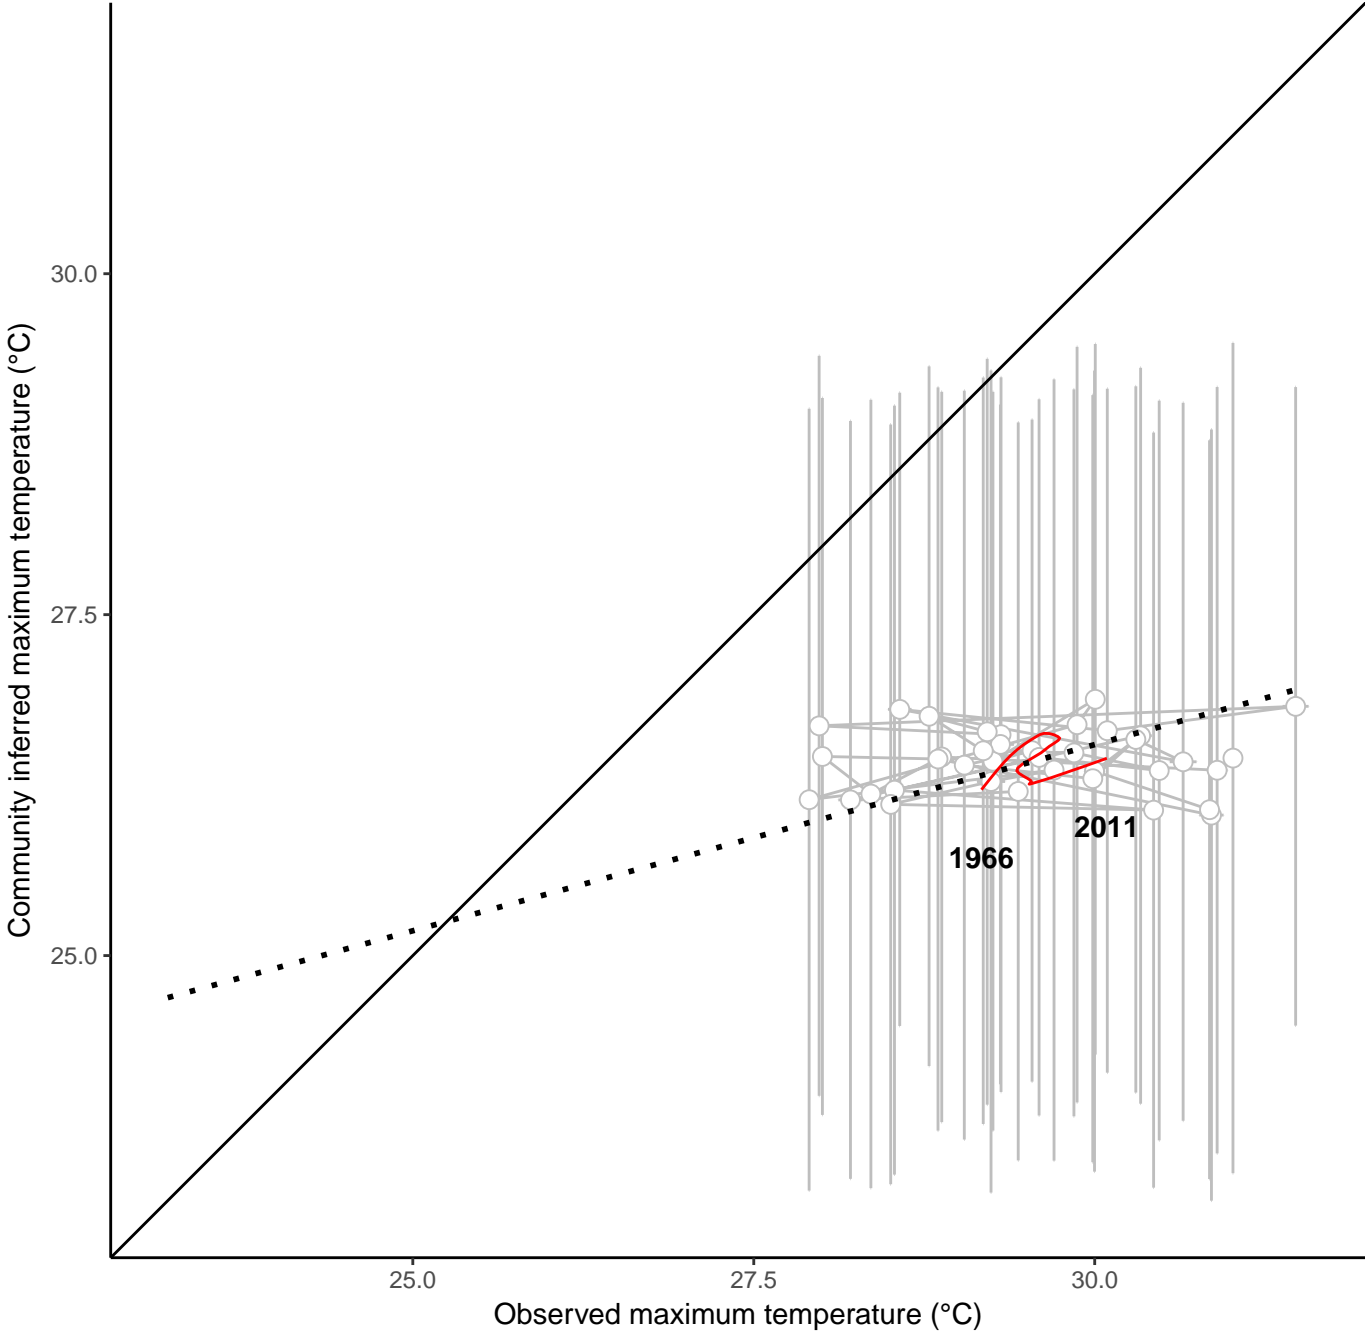

site : 840\_2\_14

absolute deviation = 4.38 | deviation change = 2.52 | maximum state number = 1

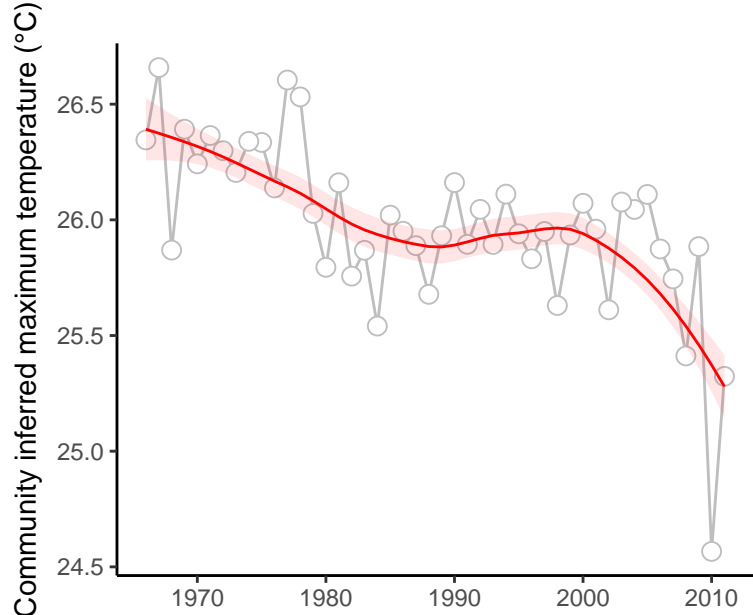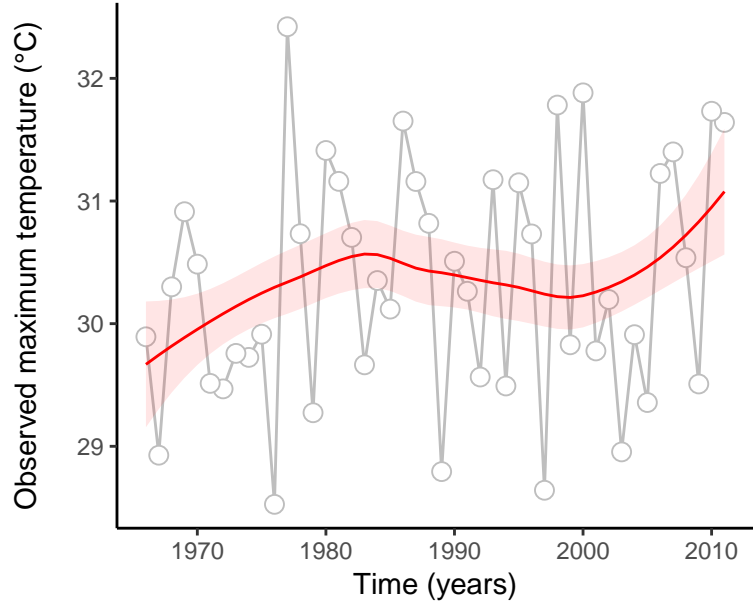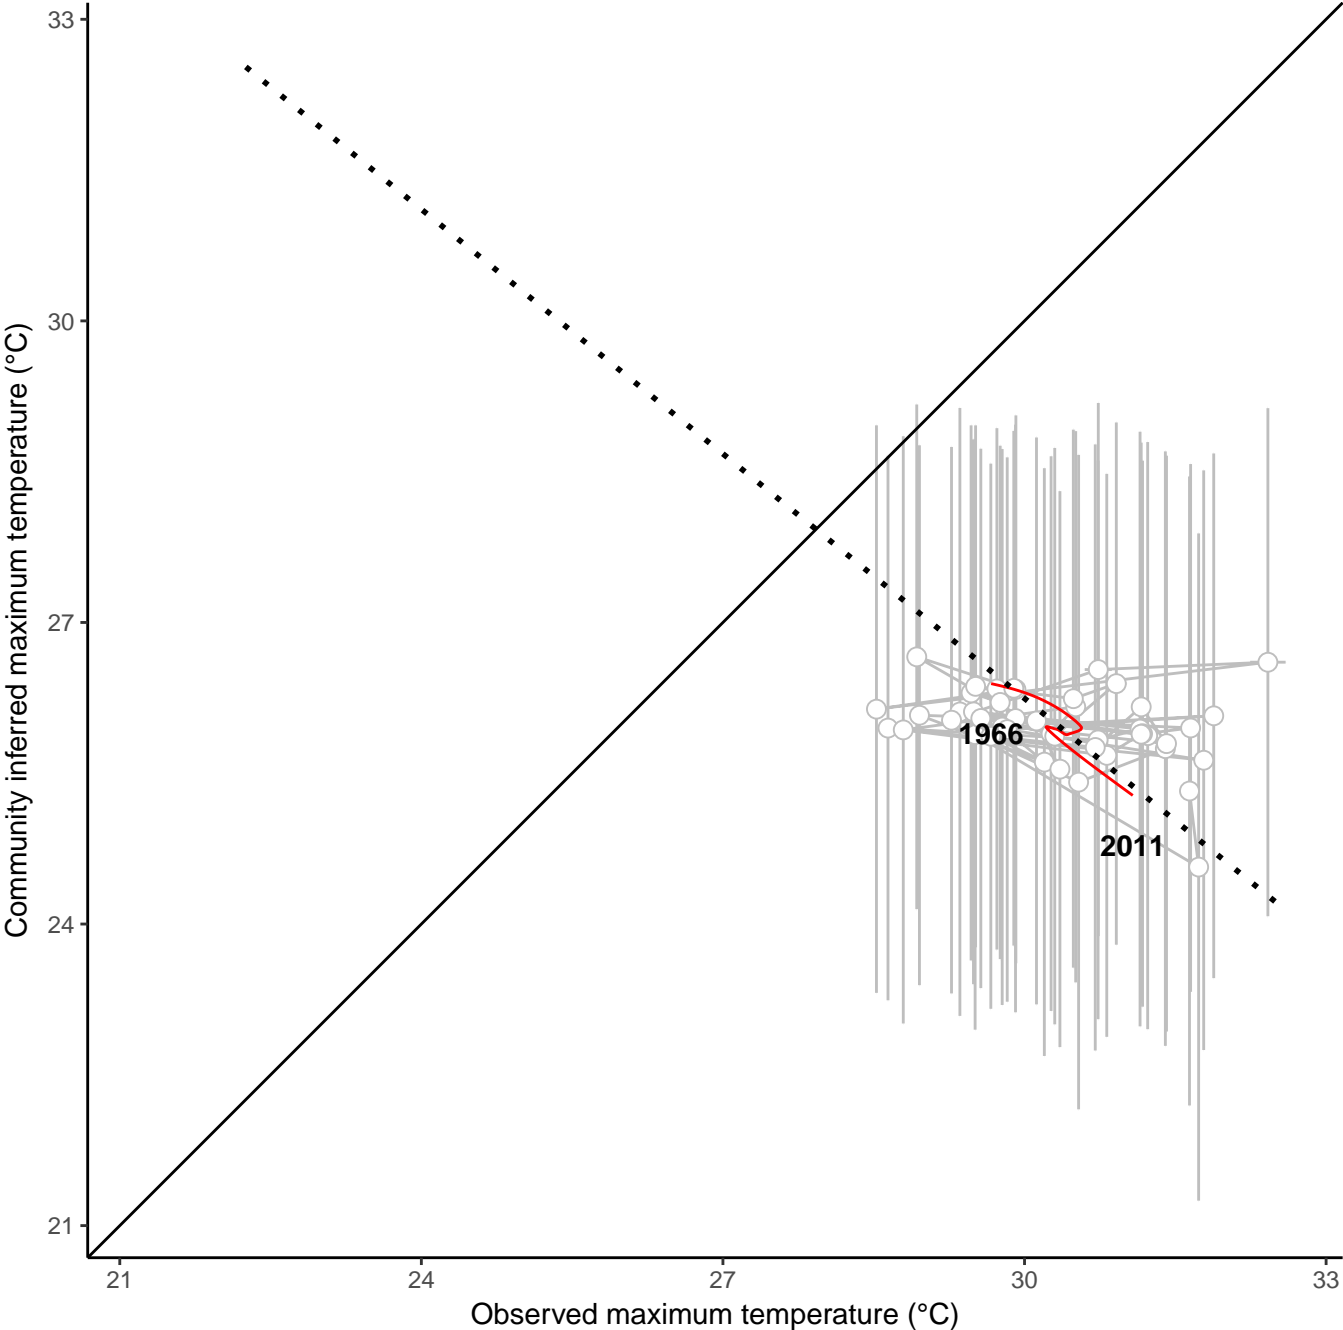

site : 840\_34\_2

absolute deviation = 2.34 | deviation change = 1.07 | maximum state number = 1

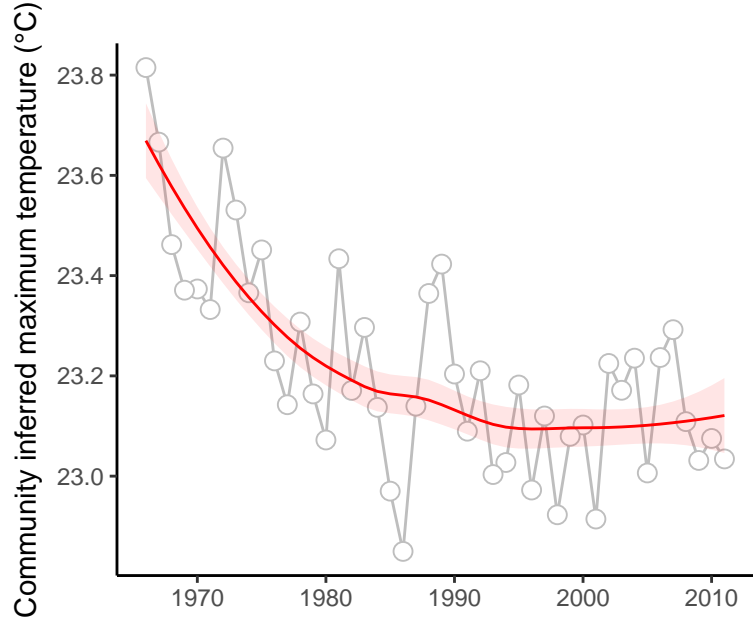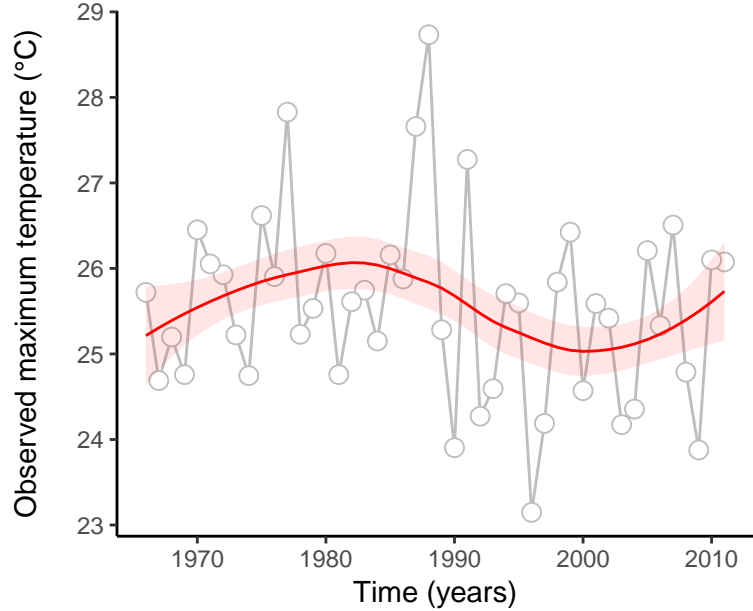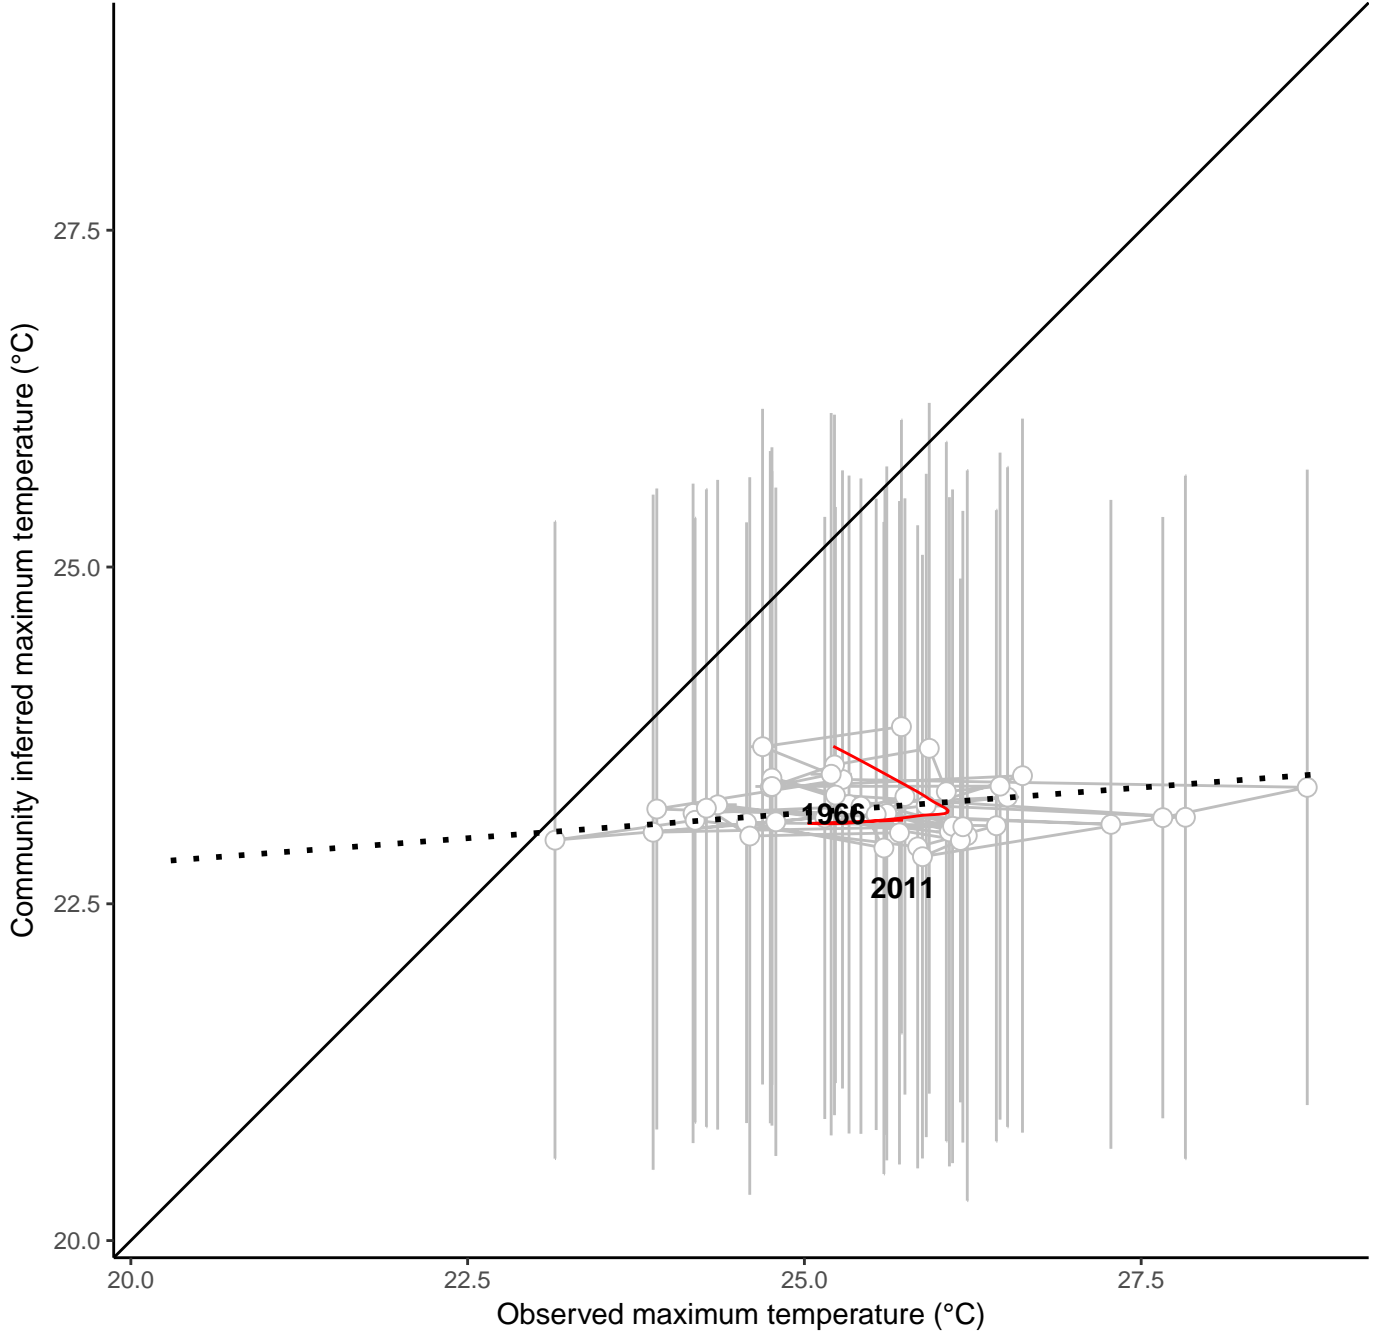

site : 840\_34\_3

absolute deviation = 2.53 | deviation change = 0.35 | maximum state number = 1

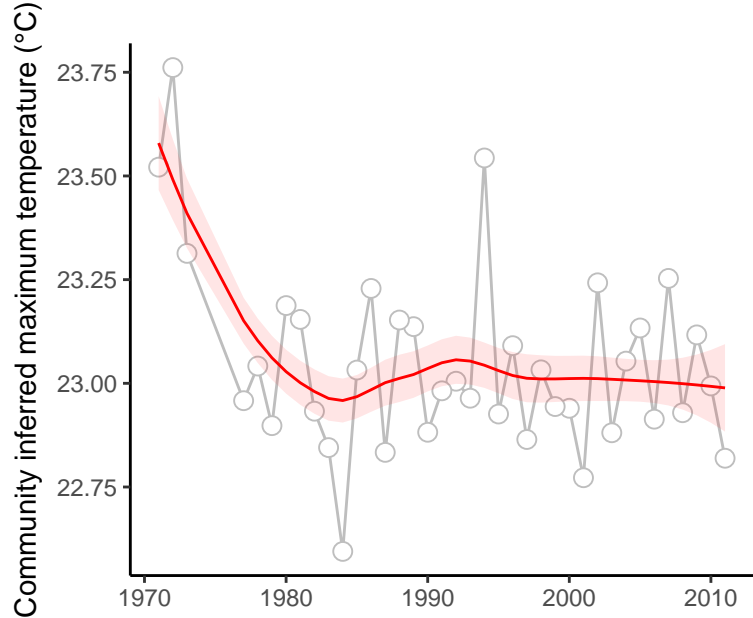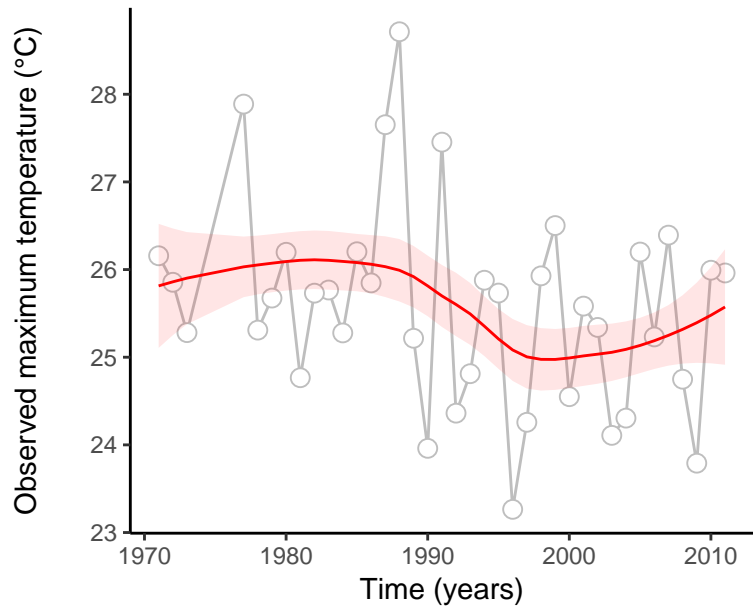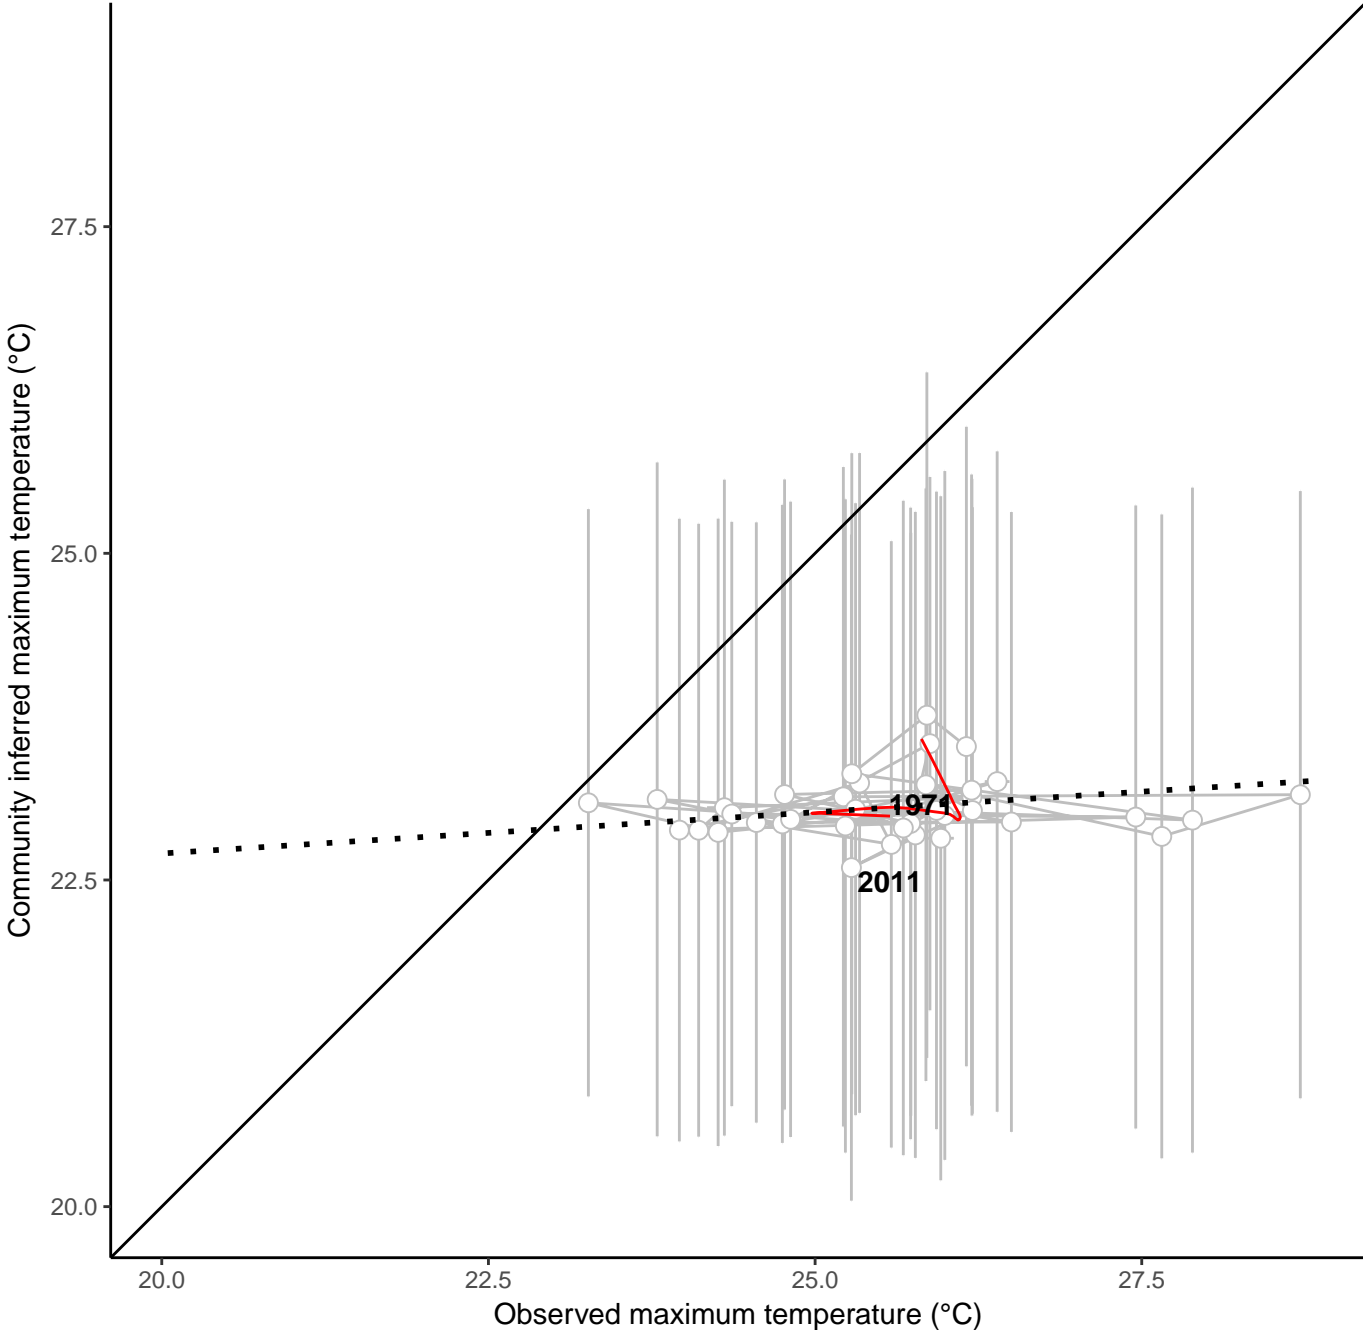

site : 840\_34\_9

absolute deviation = 3.16 | deviation change = 2.38 | maximum state number = 1

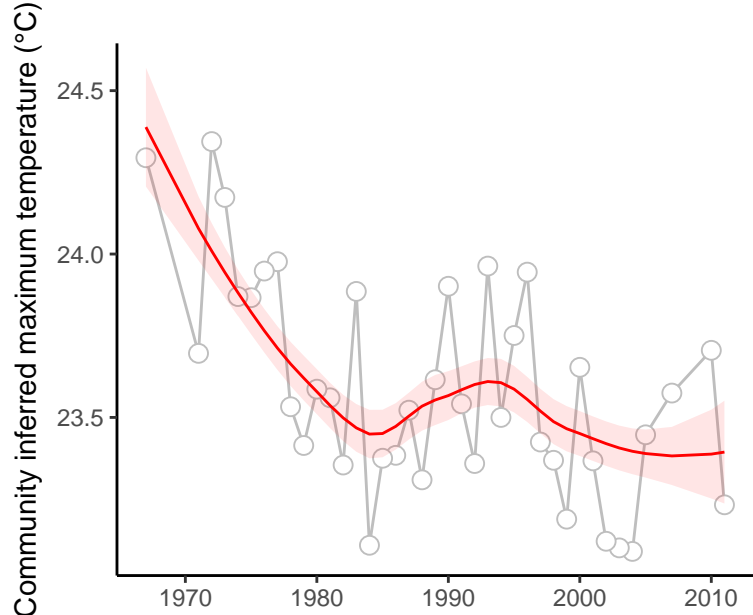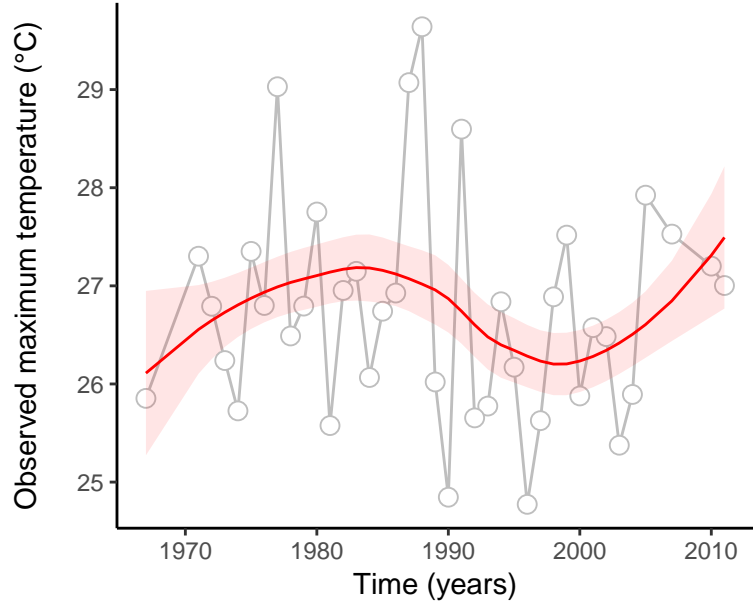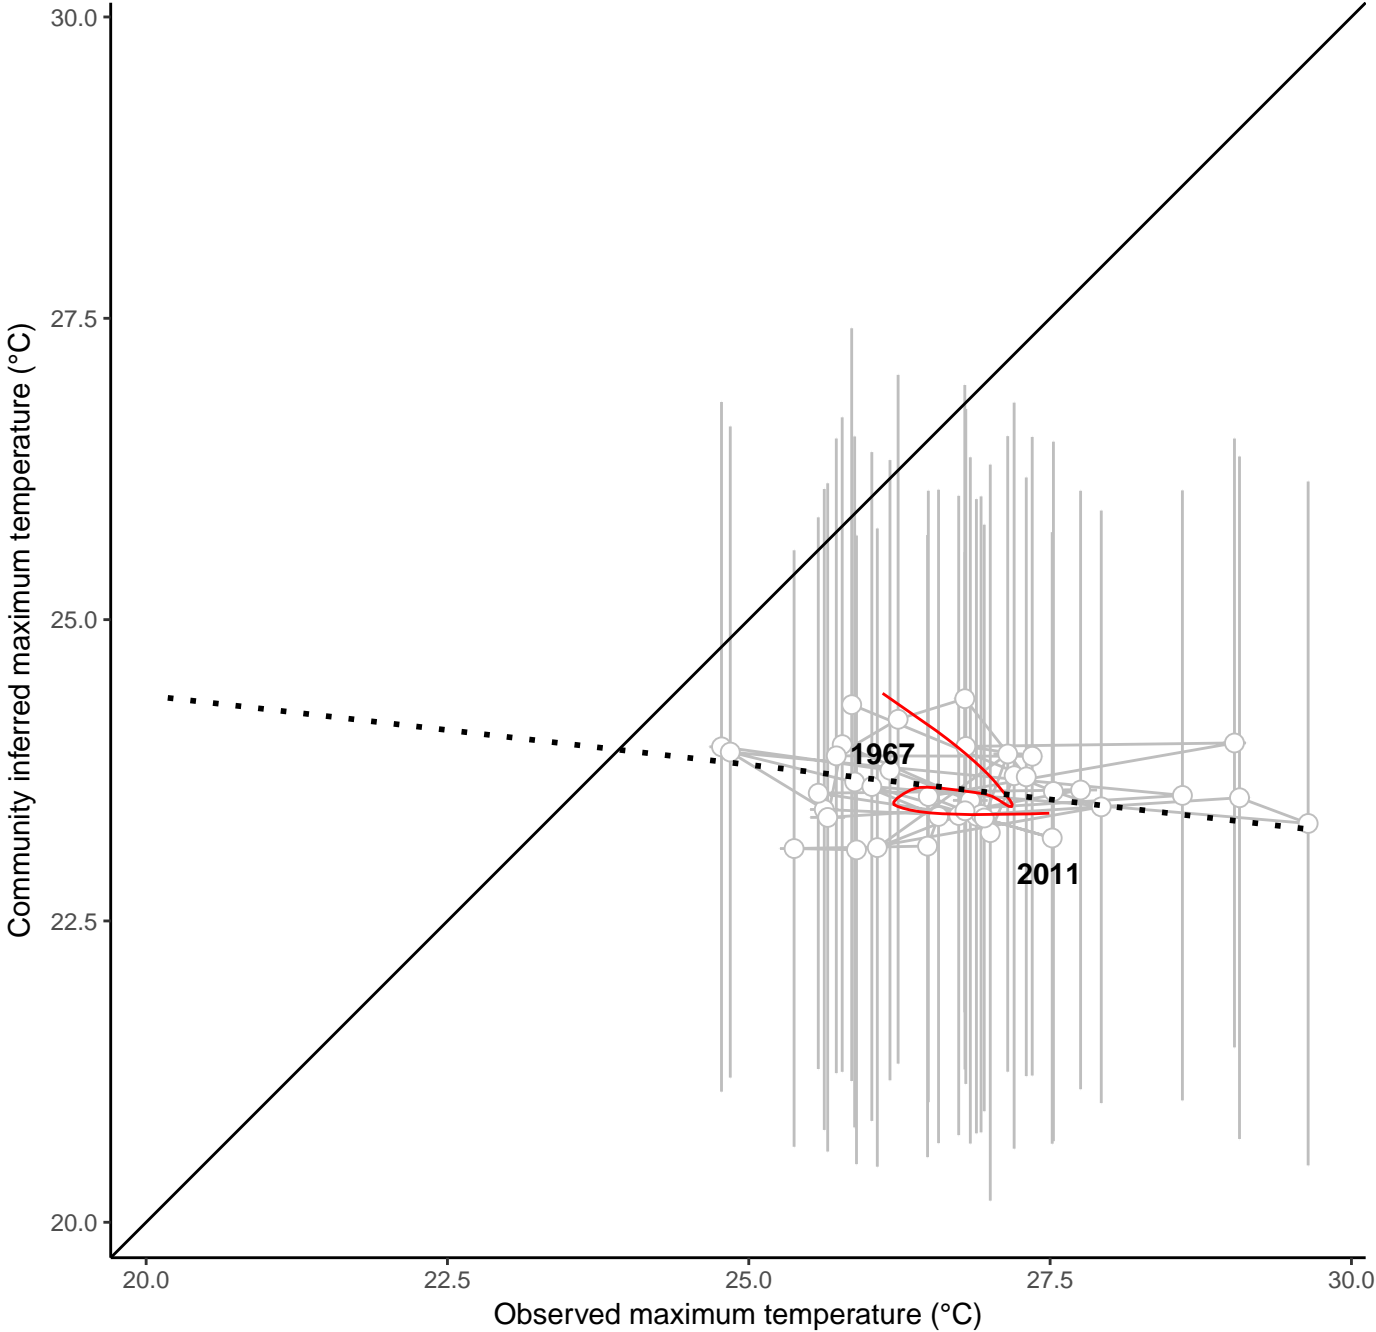

site : 840\_36\_27

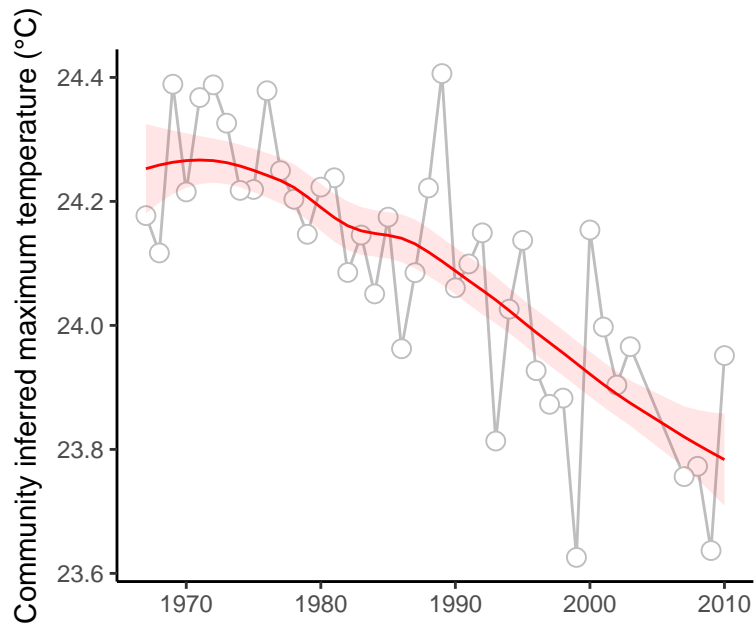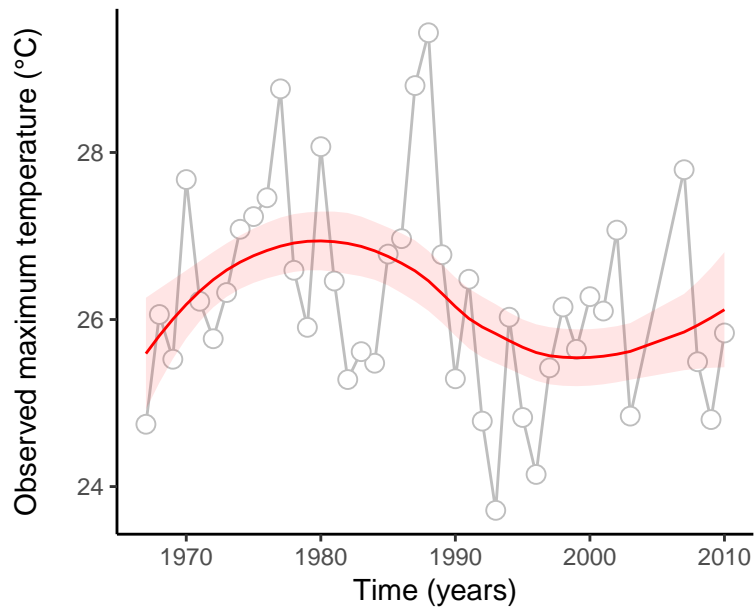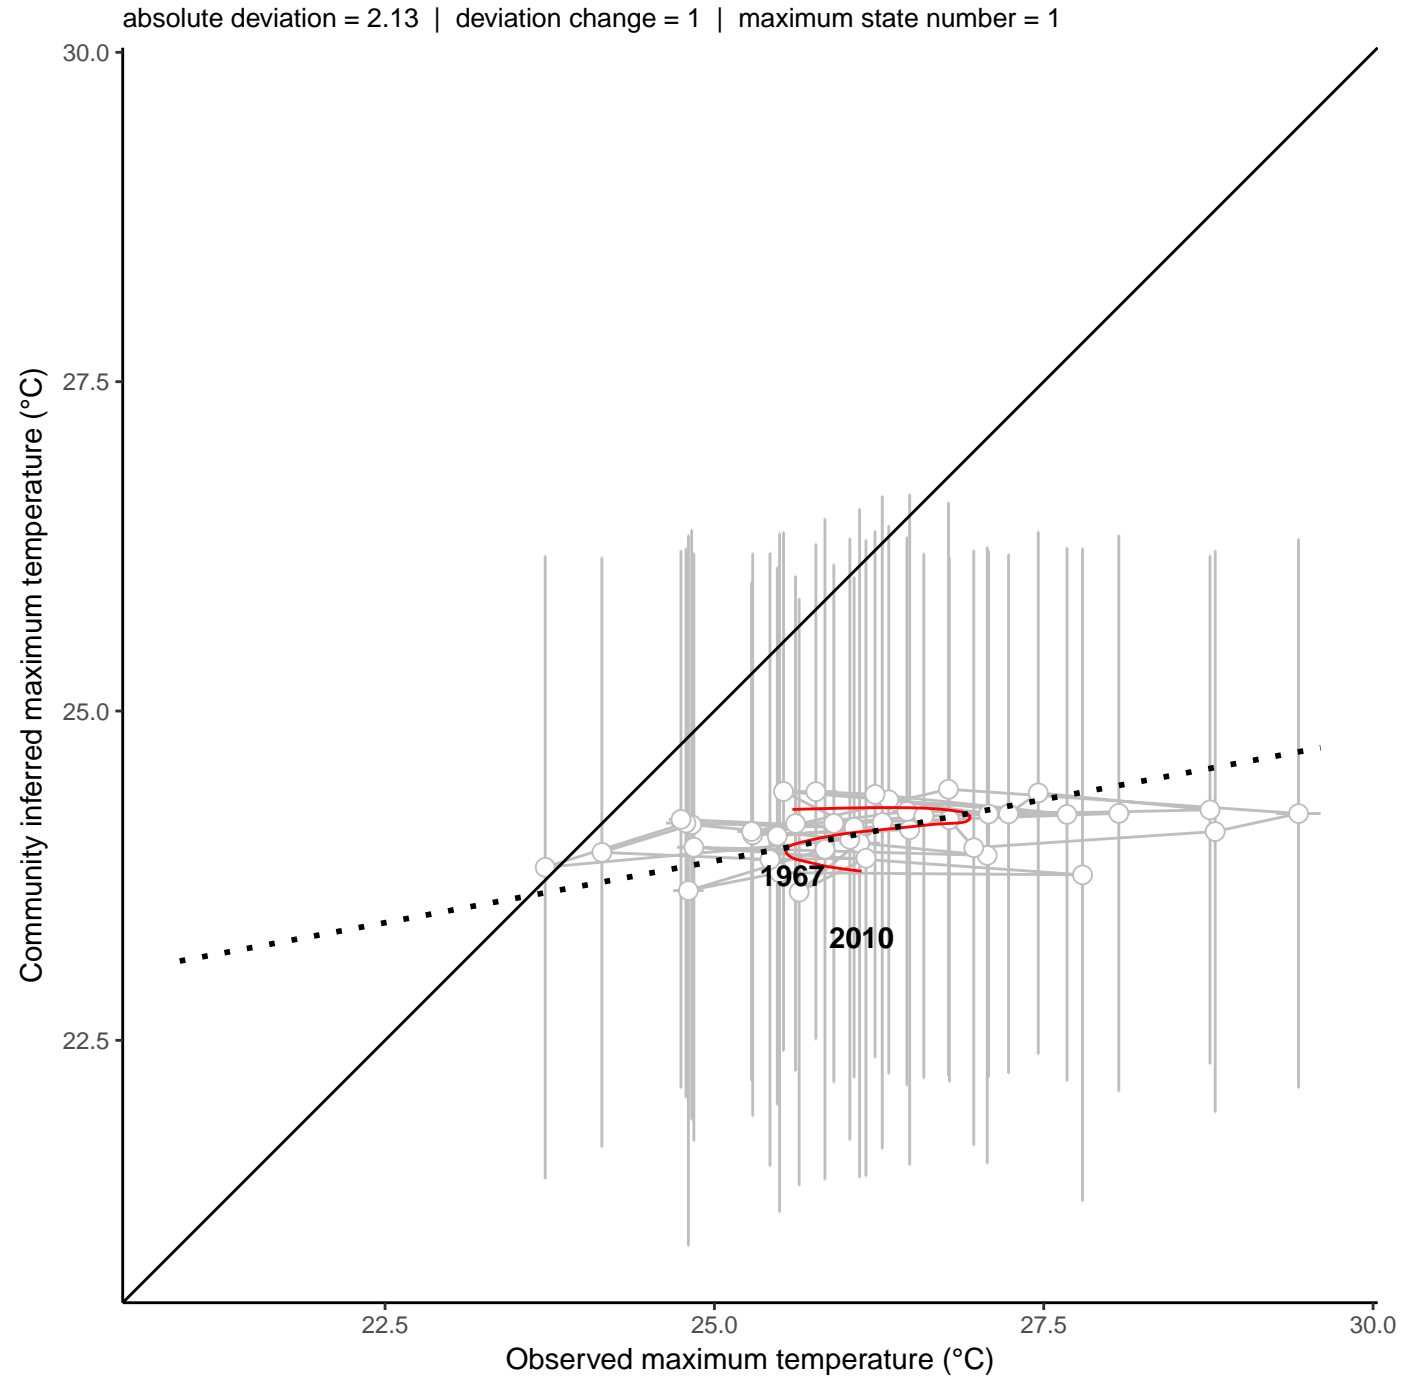

site : 840\_46\_37

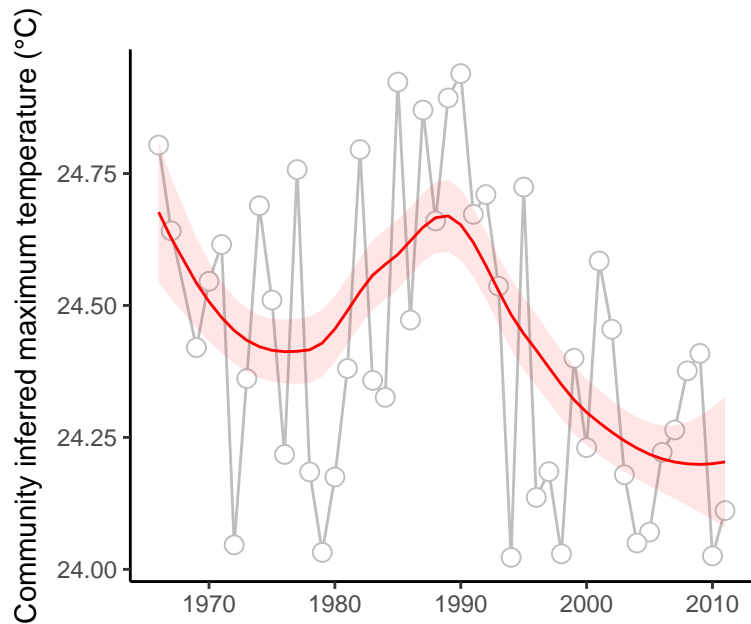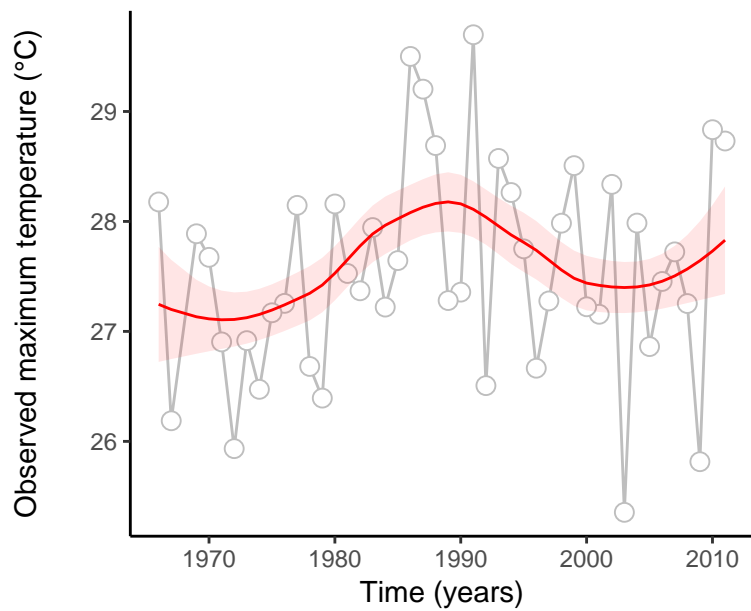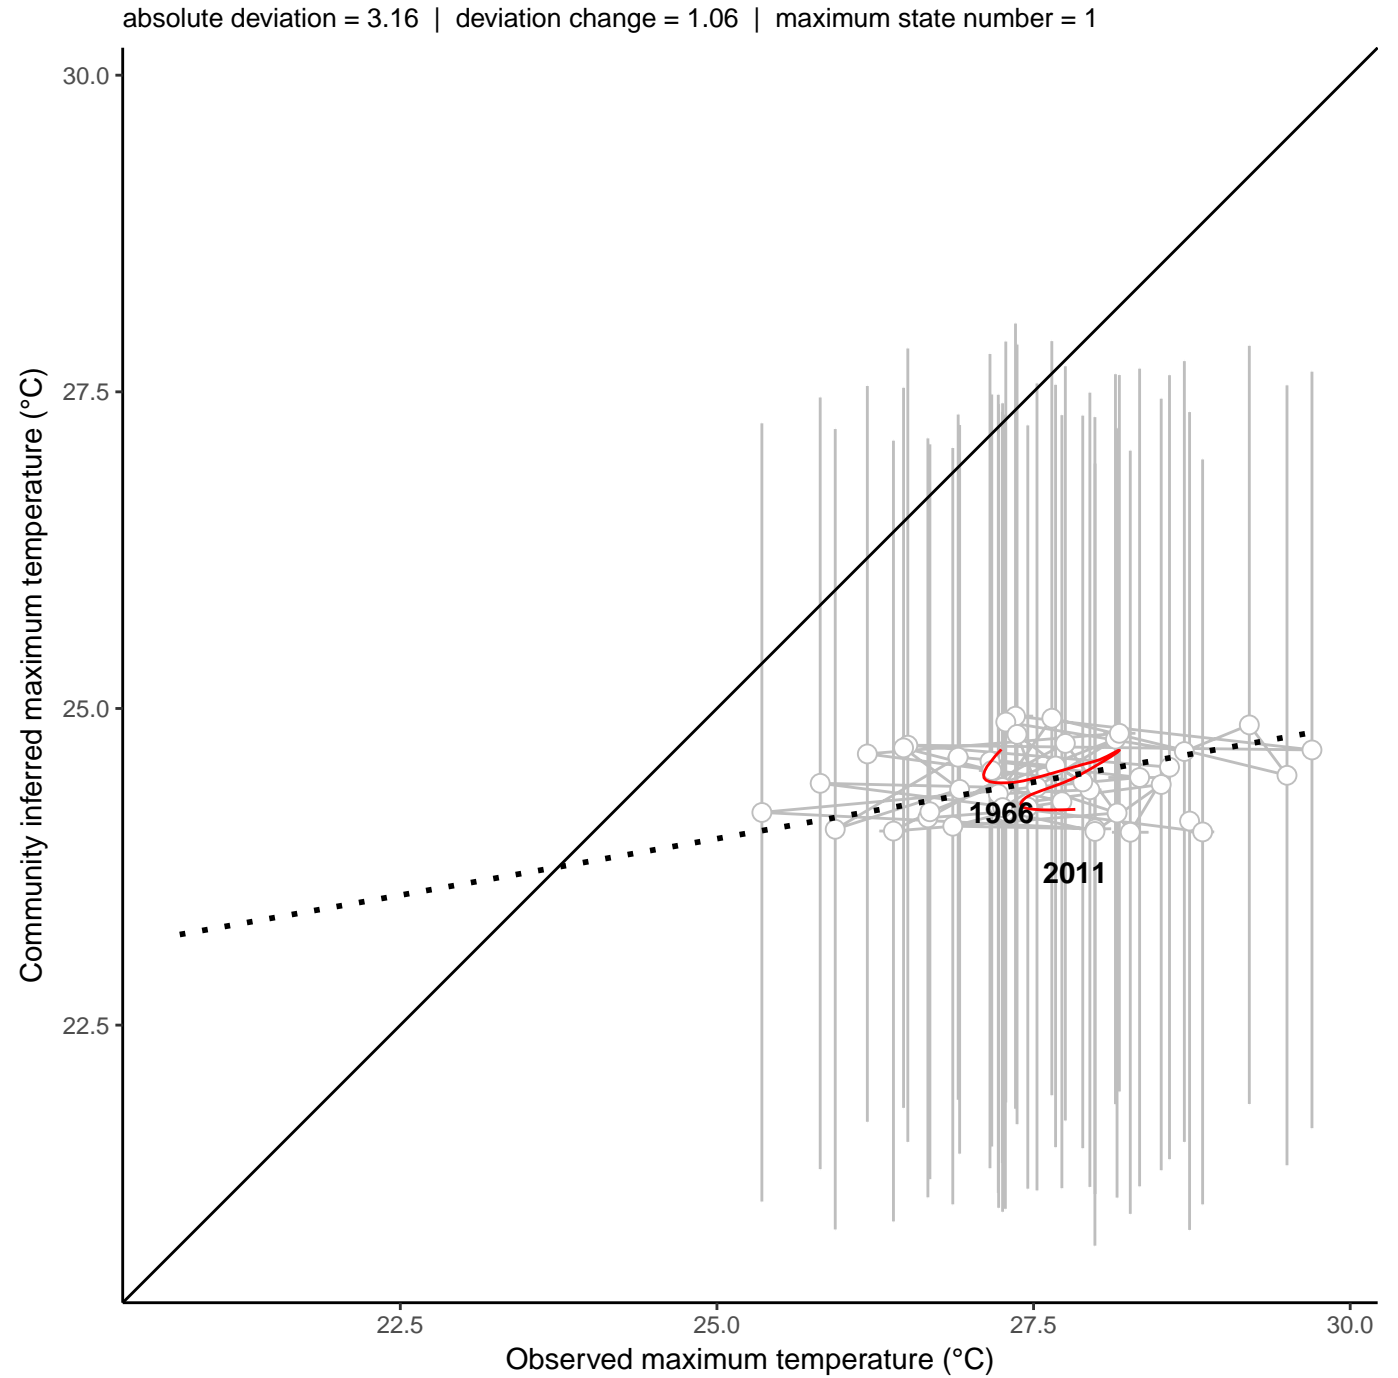



site : 840\_61\_42

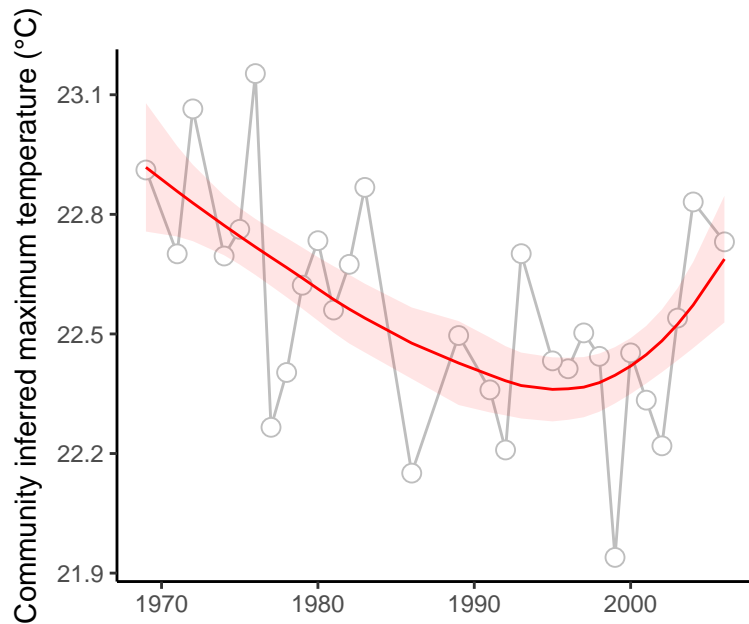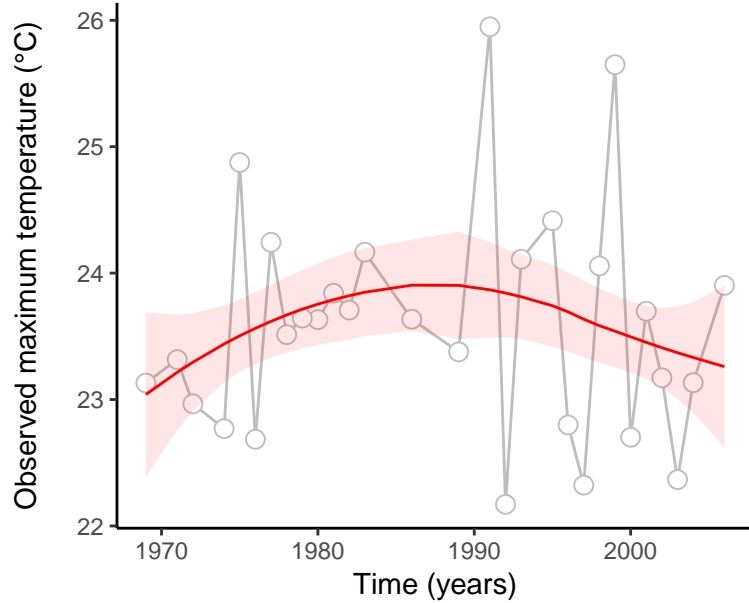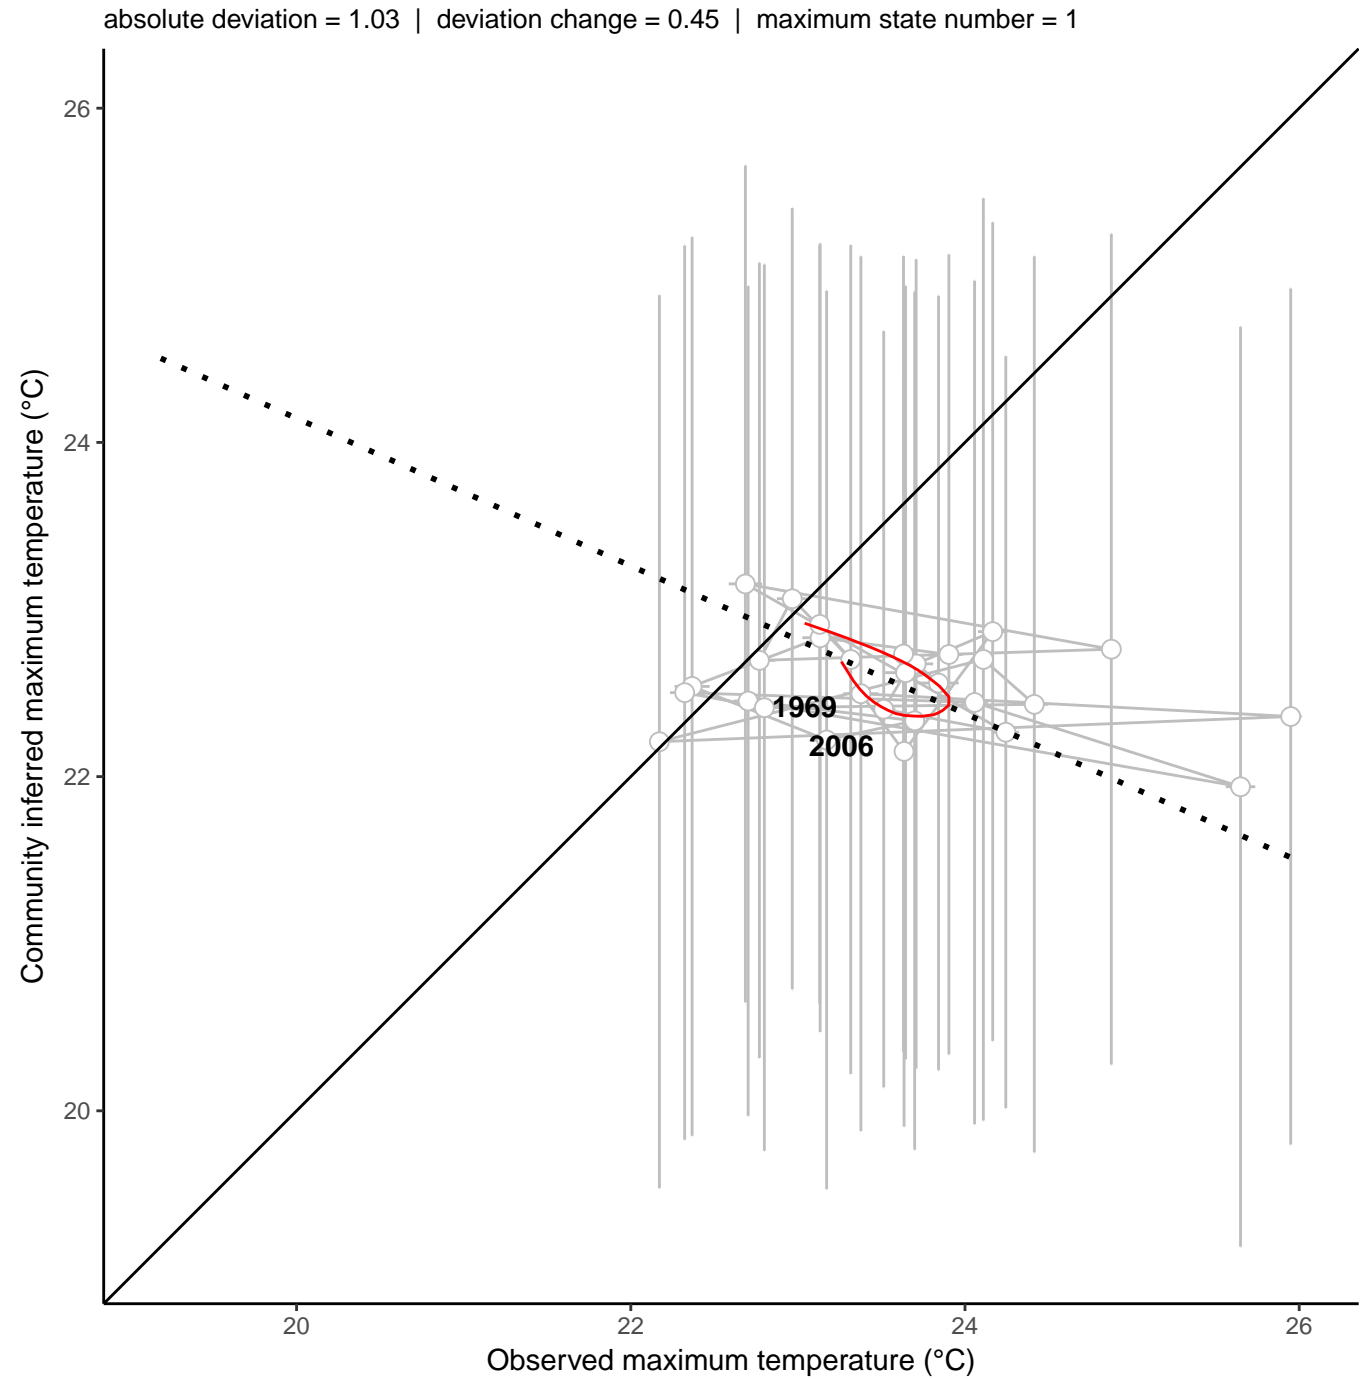

site : 840\_66\_60

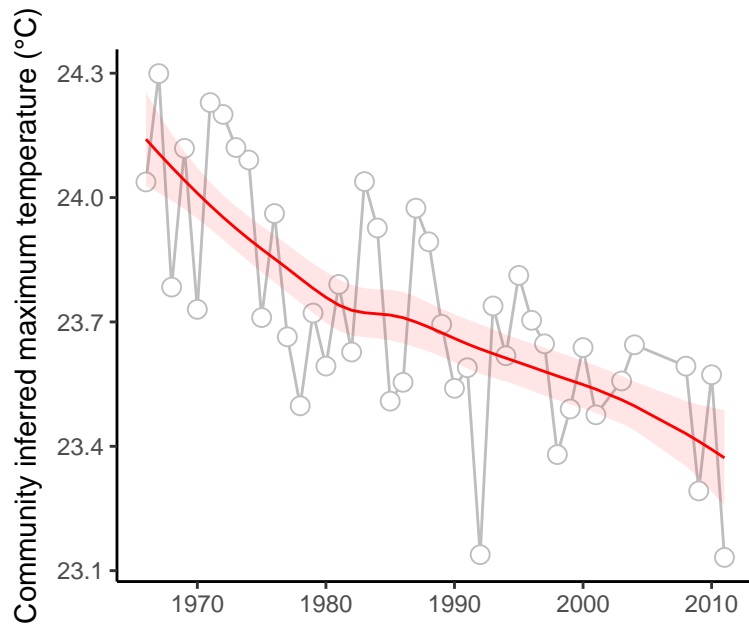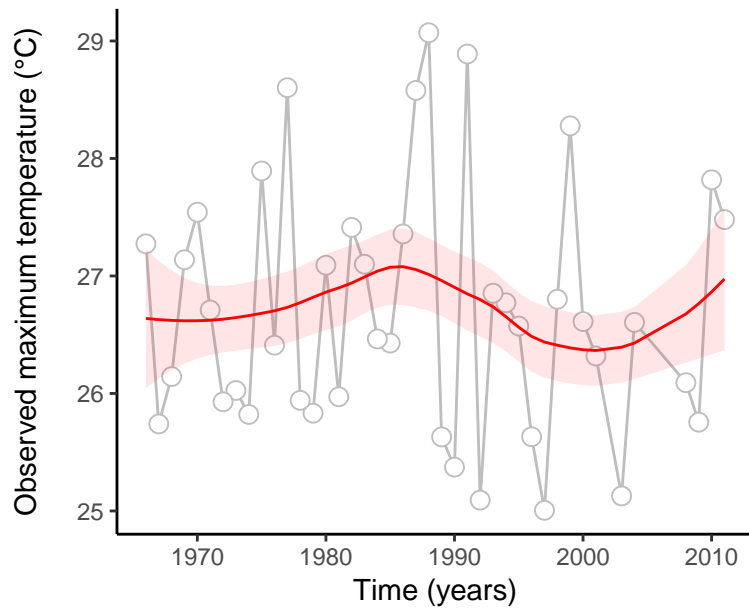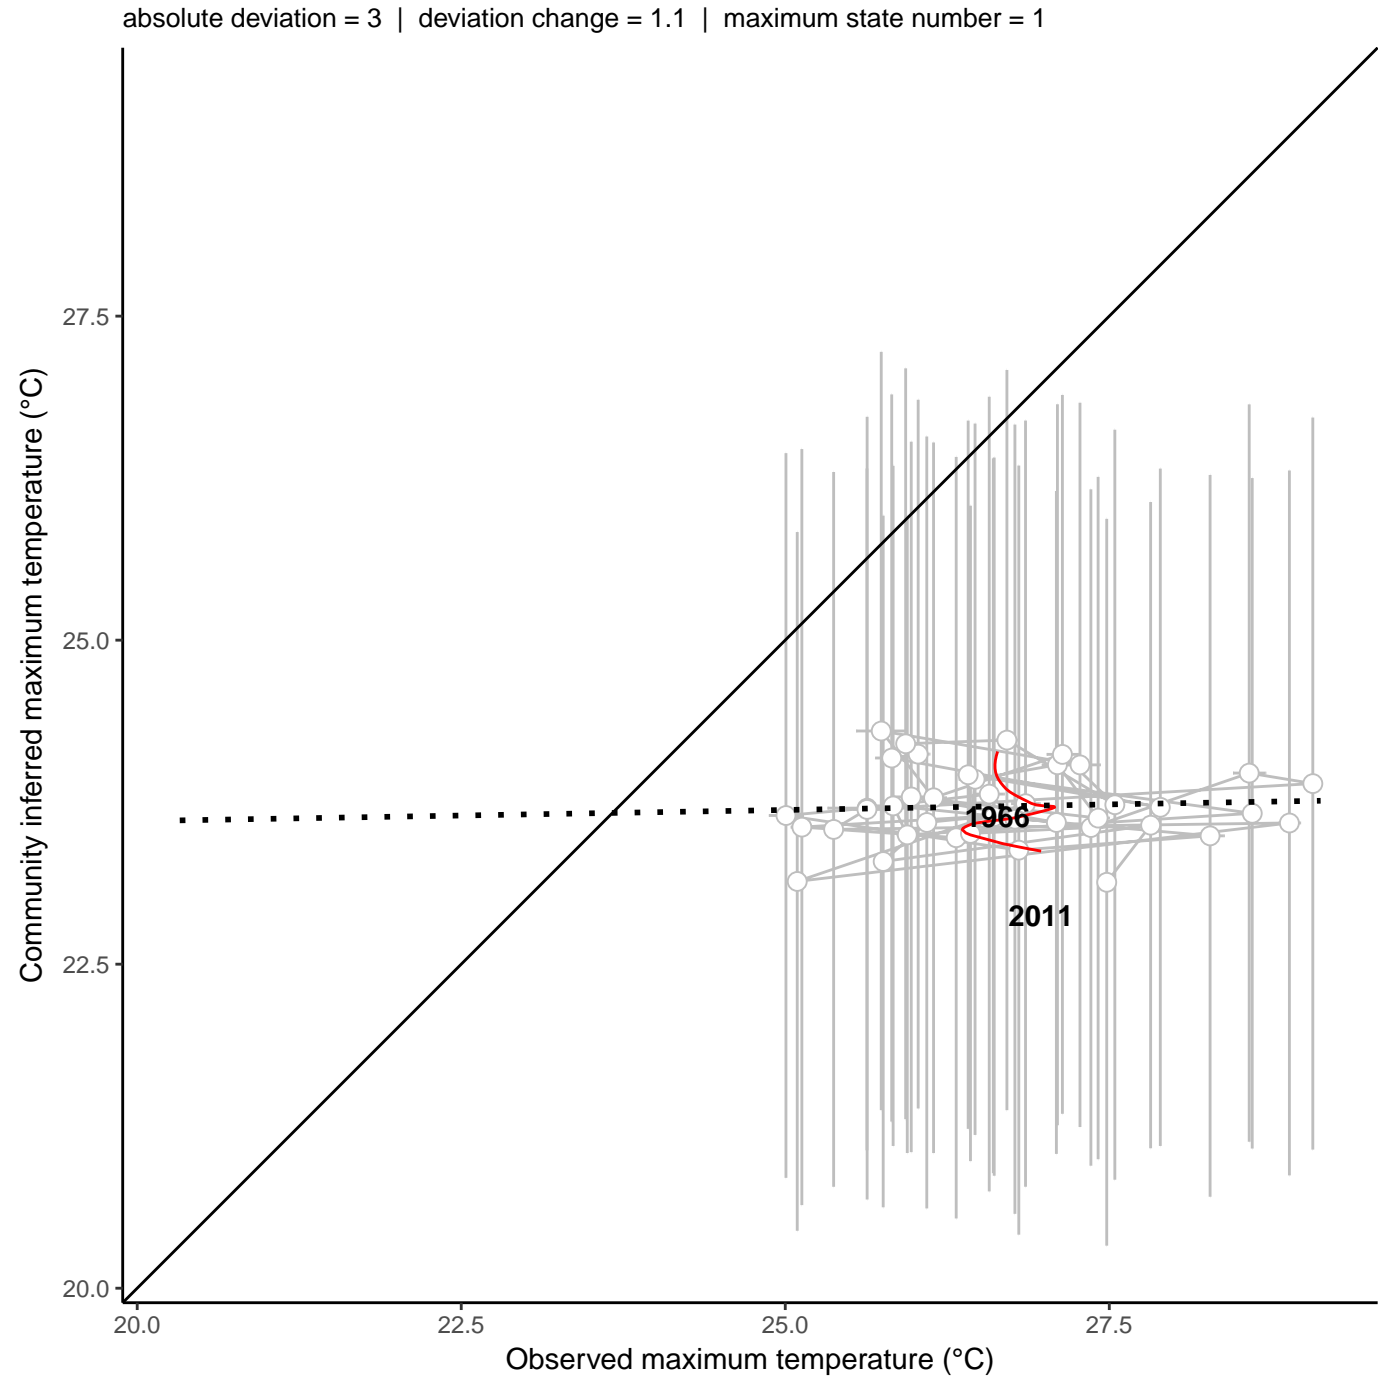

site : 840\_72\_84

absolute deviation = 2.61 | deviation change = 1.43 | maximum state number = 1

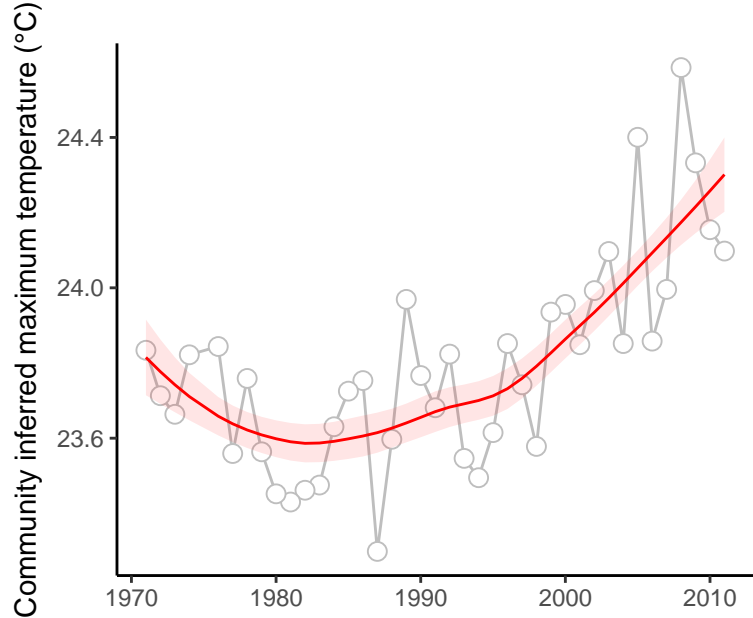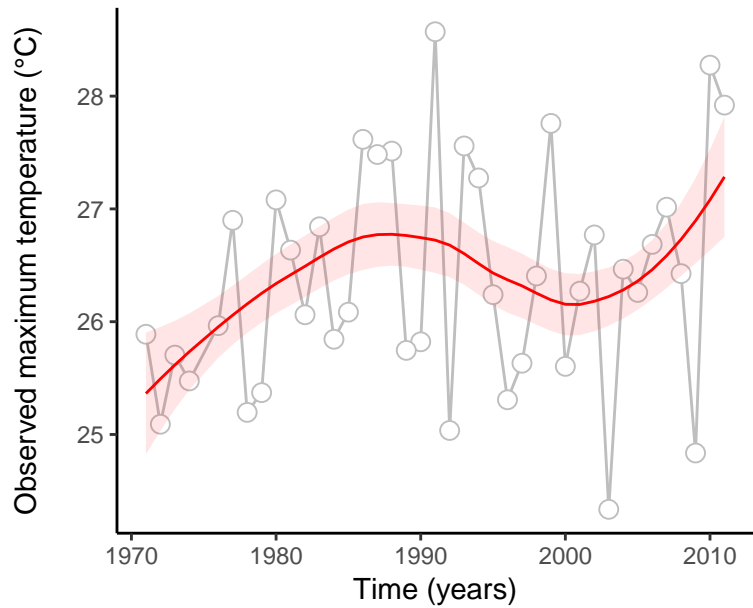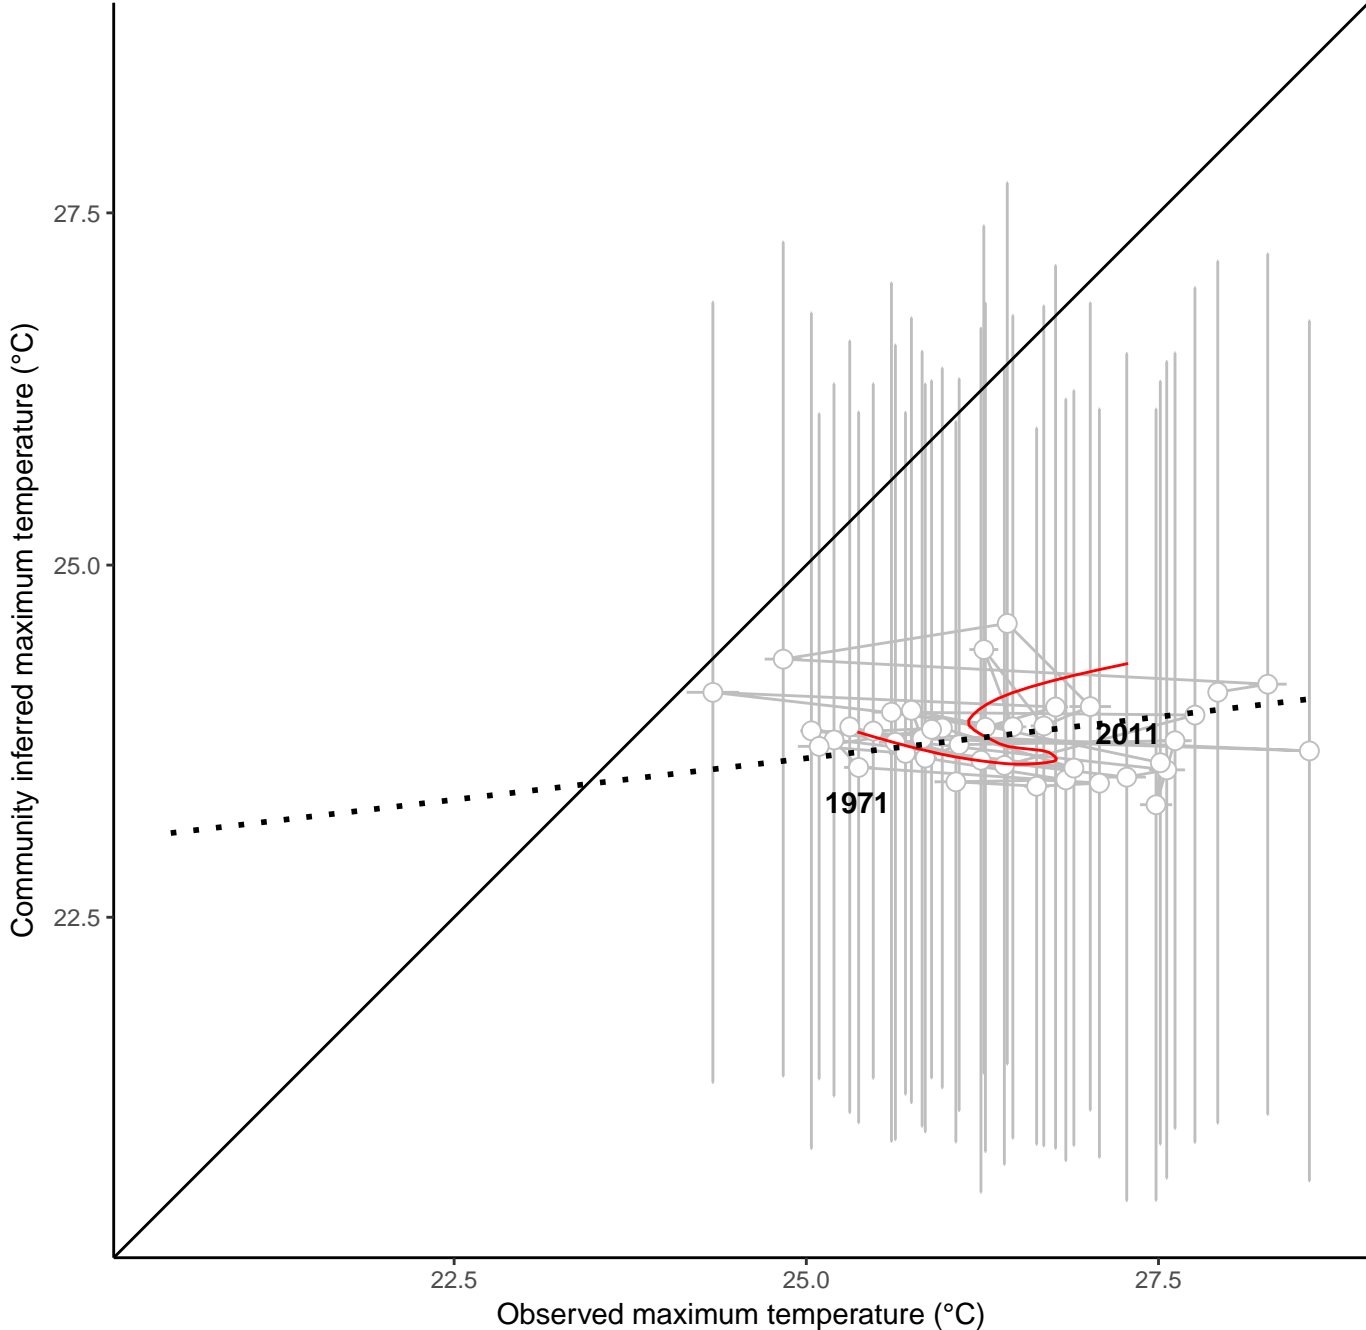

site : 840\_88\_4

absolute deviation = 1.76 | deviation change = 1.1 | maximum state number = 1

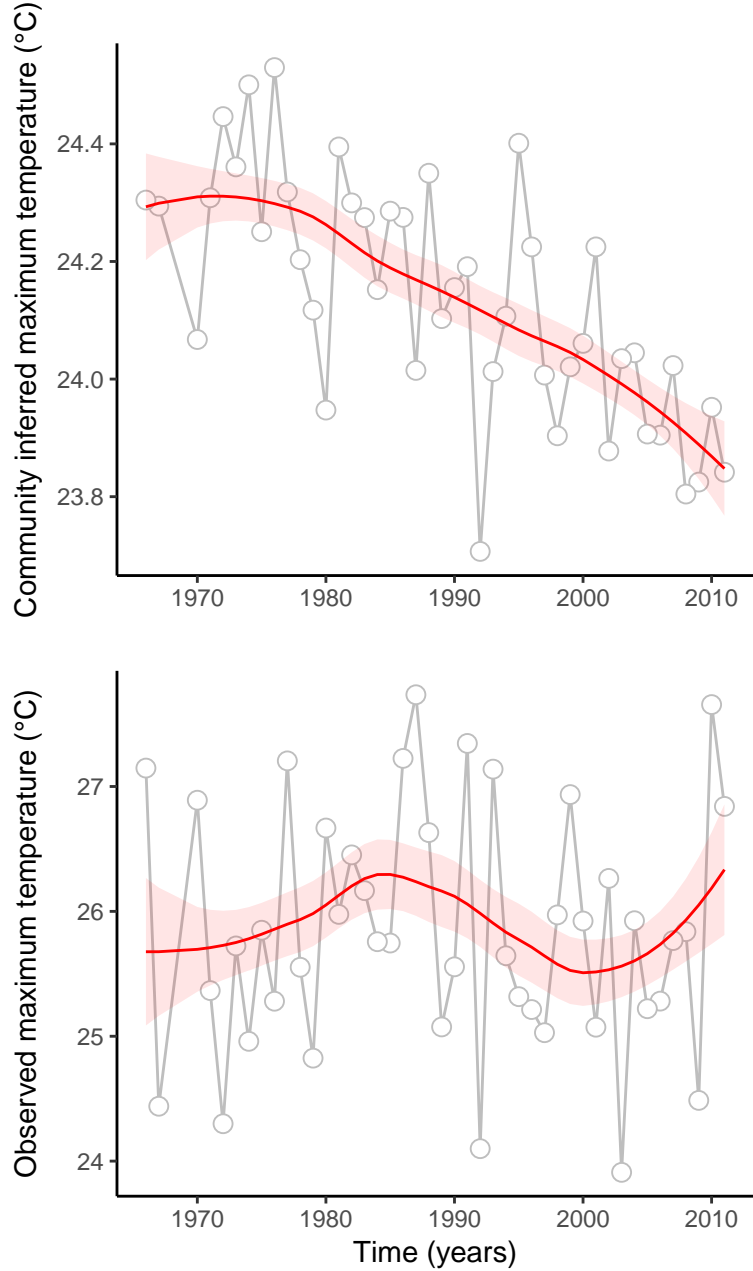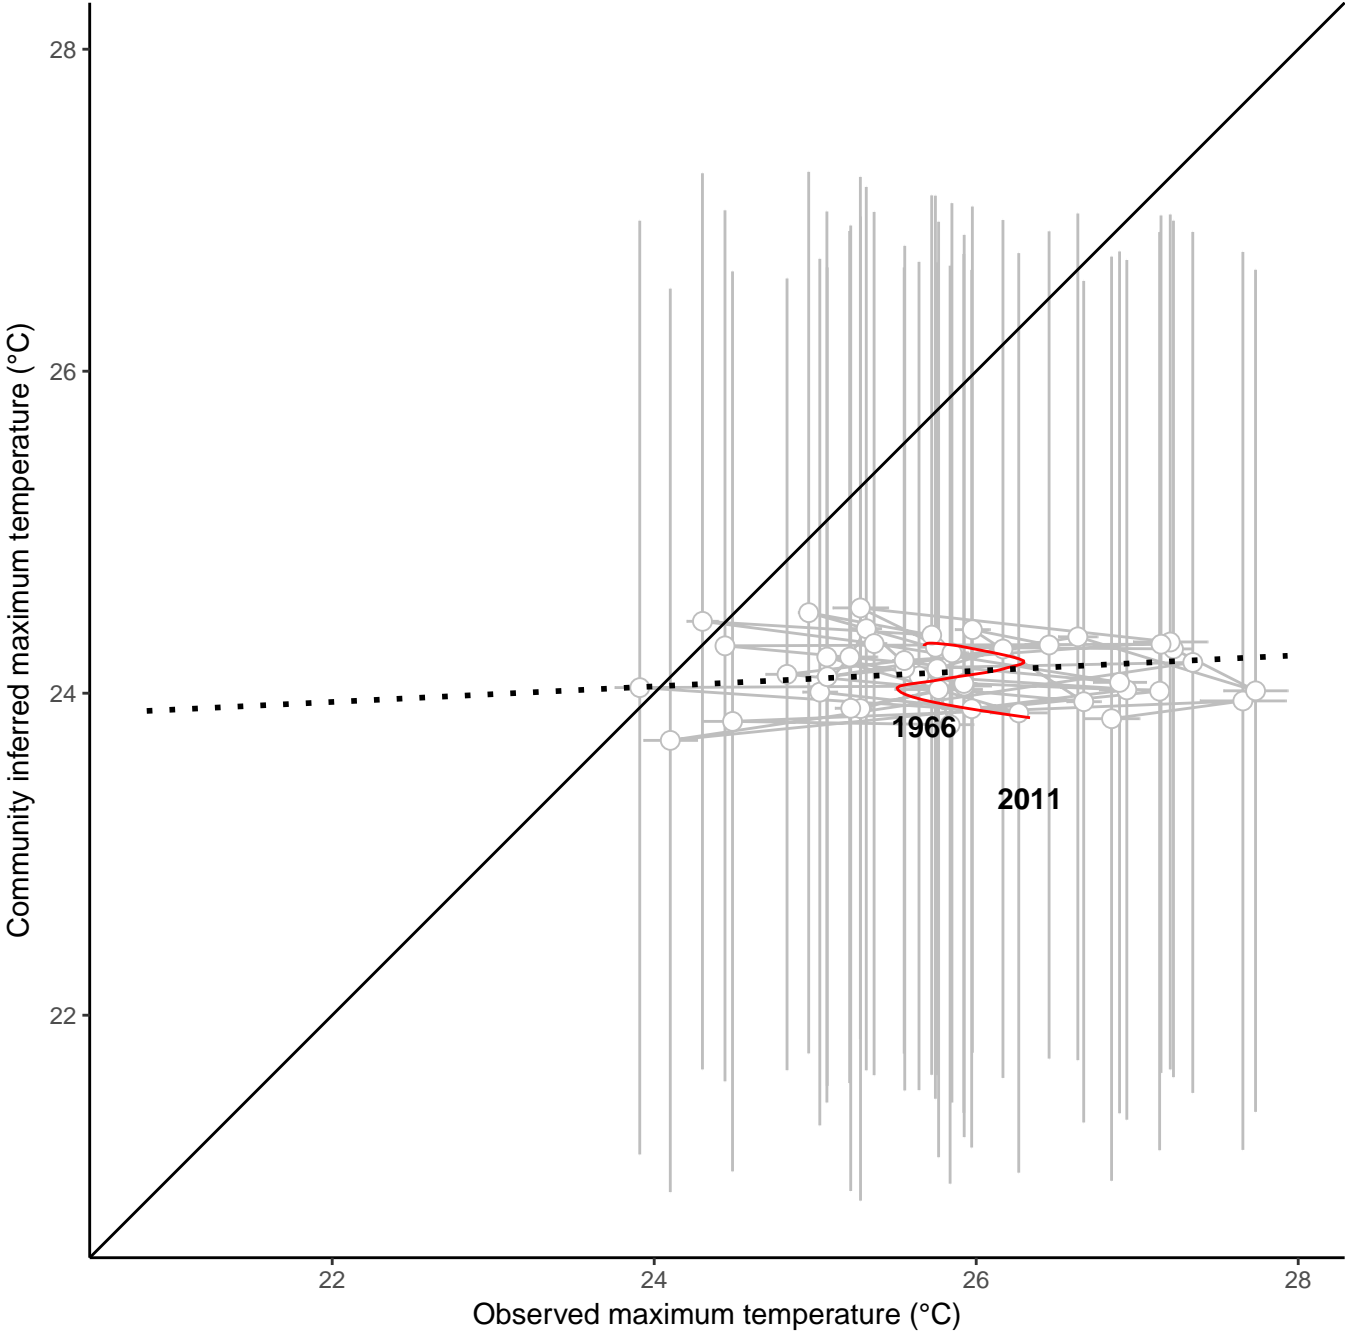

site : 840\_91\_31

absolute deviation = 1.42 | deviation change = 0.75 | maximum state number = 1

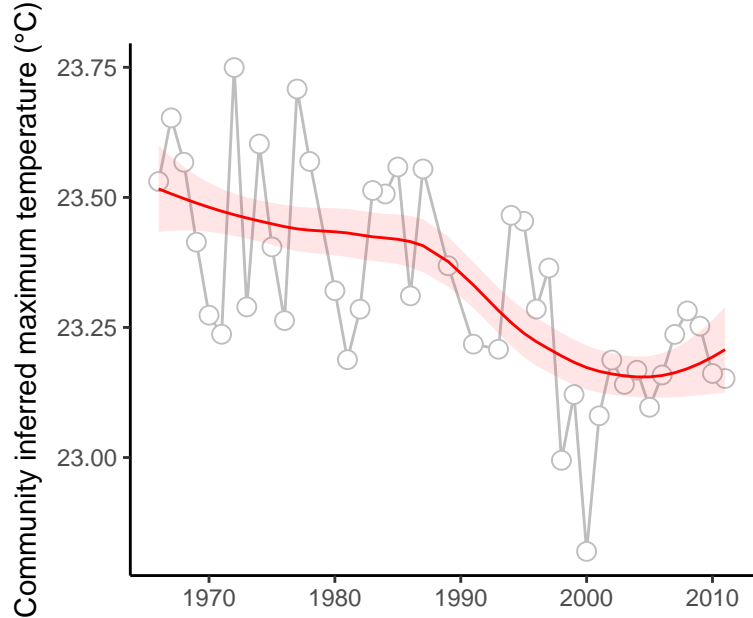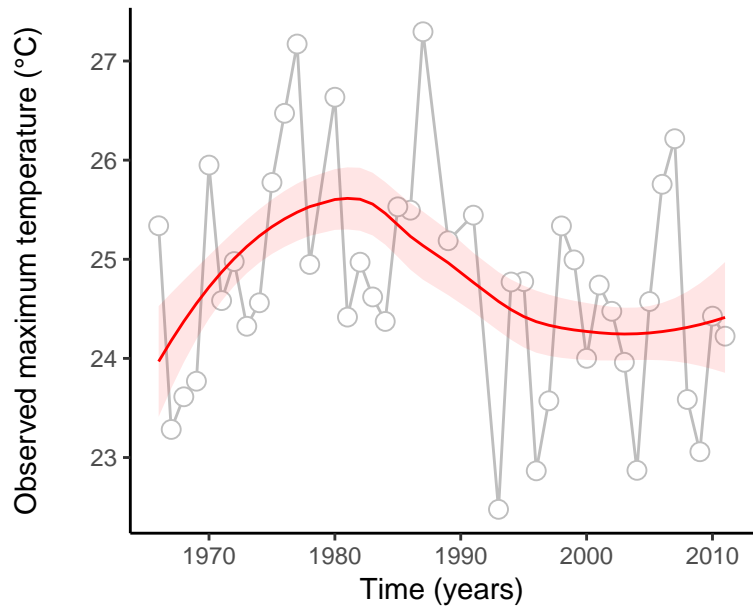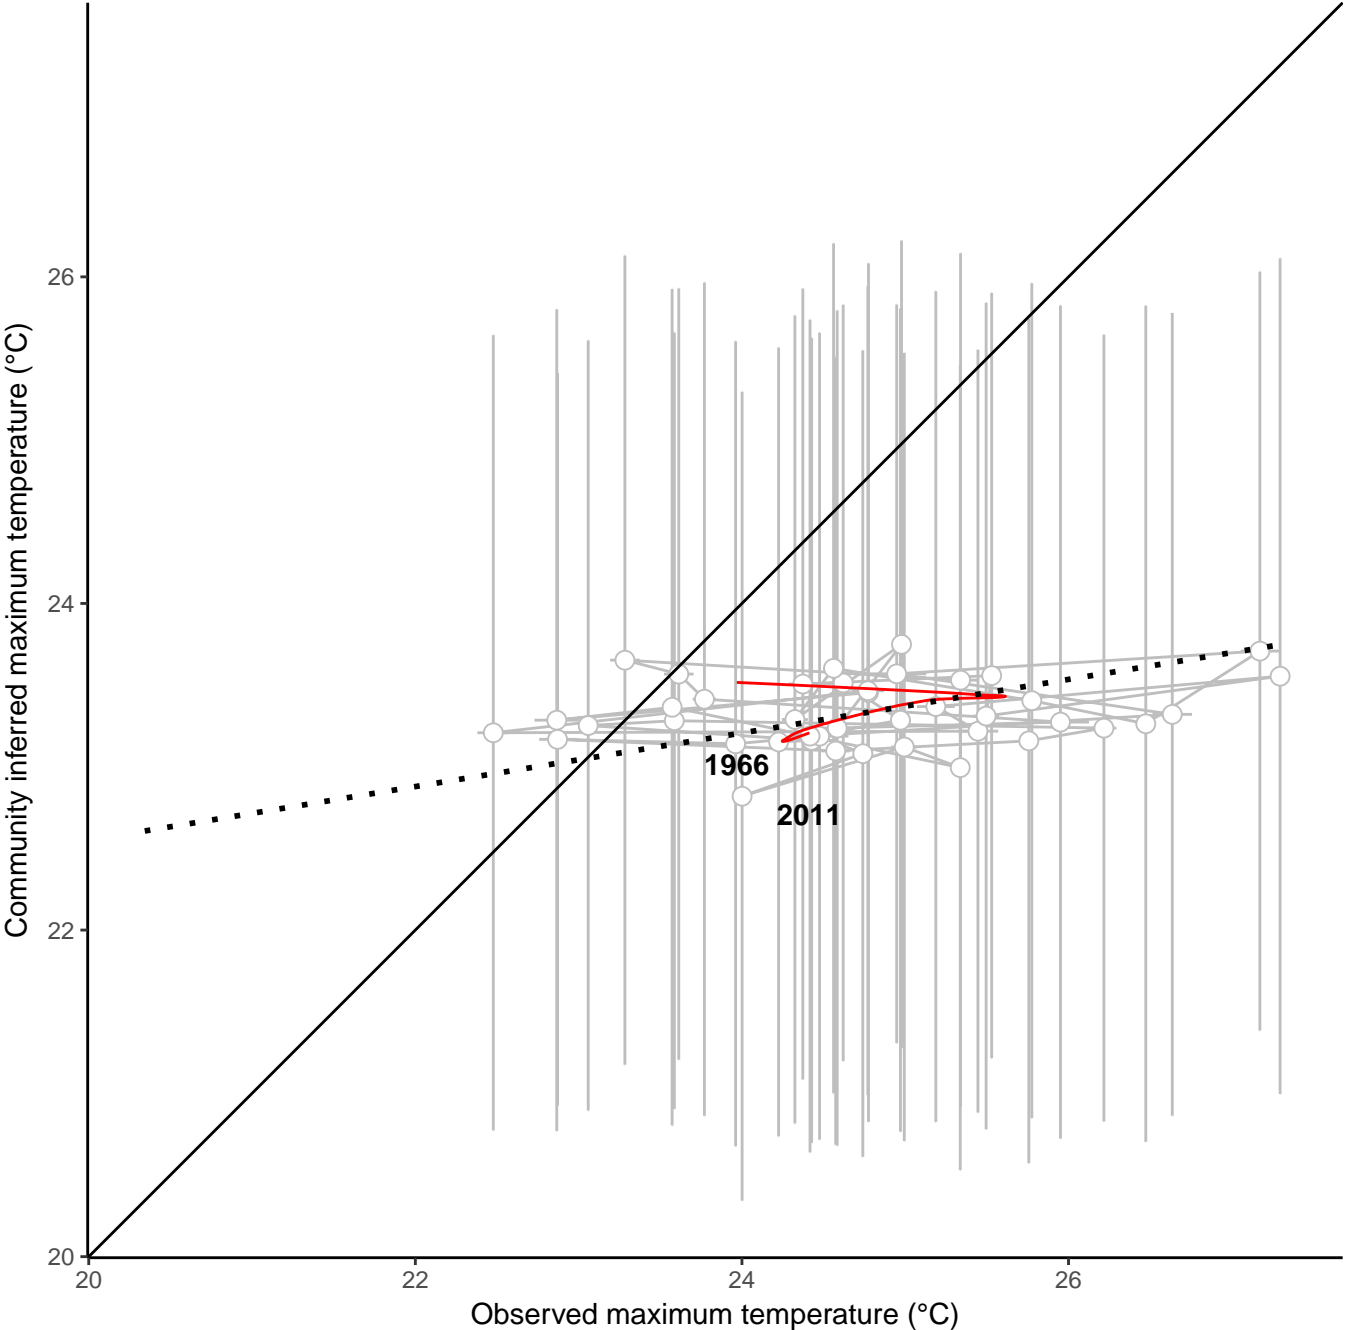

site : 840\_91\_54

absolute deviation = 1.39 | deviation change = 0.09 | maximum state number = 1

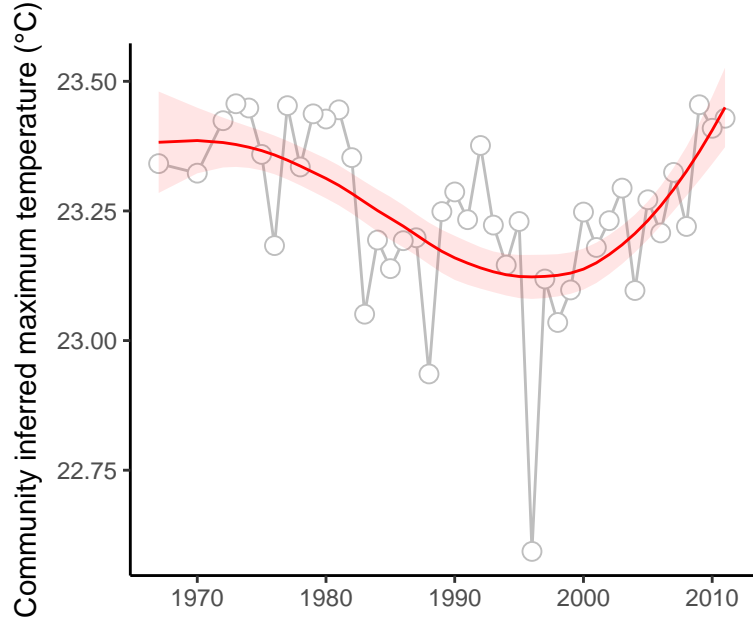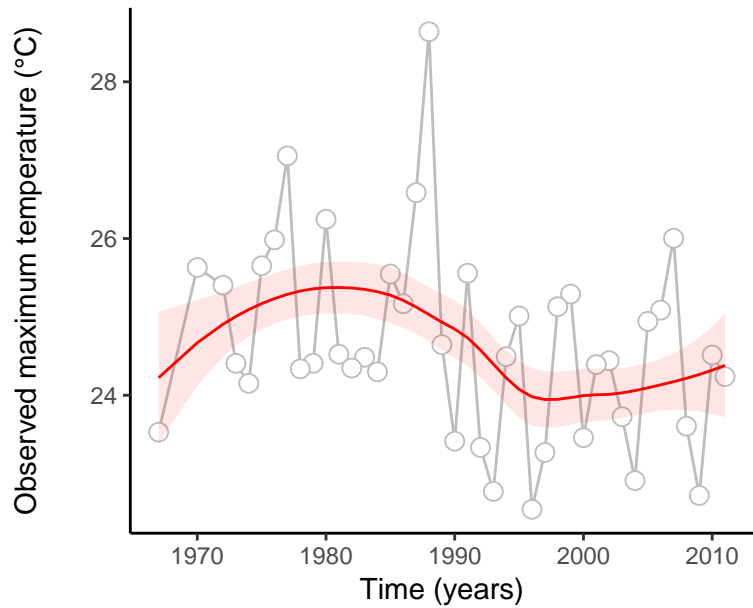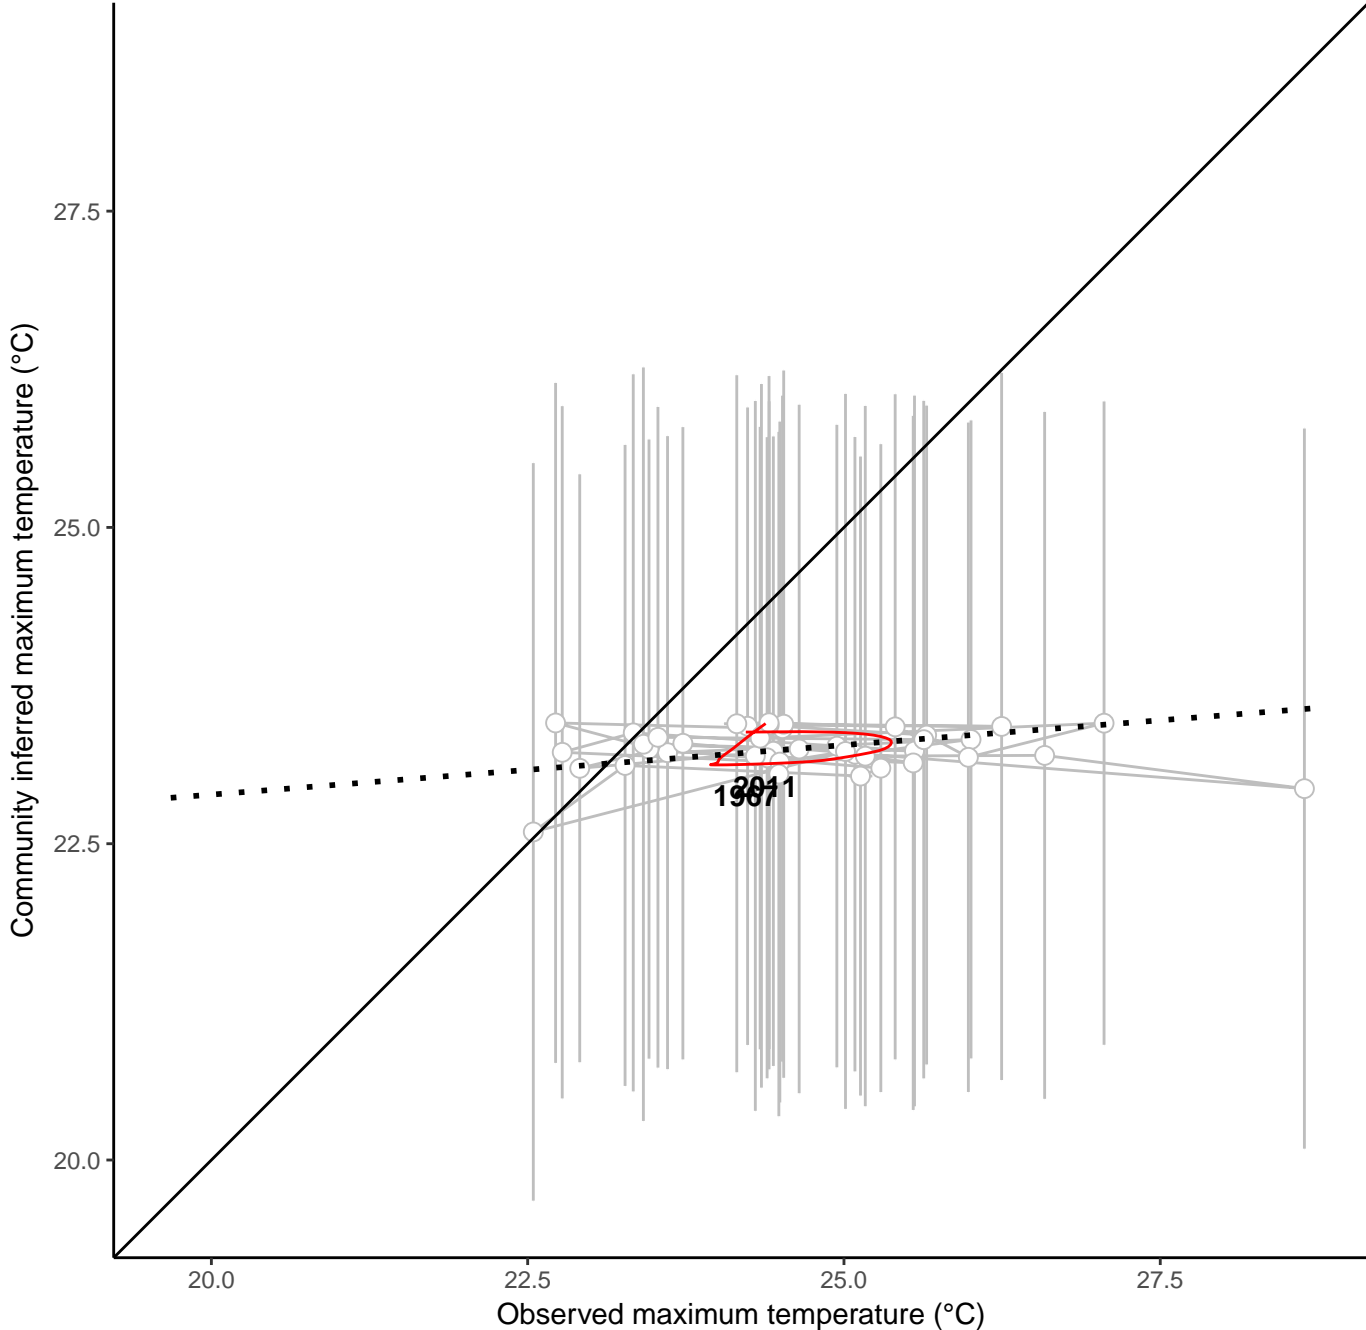

site : 840\_14\_168

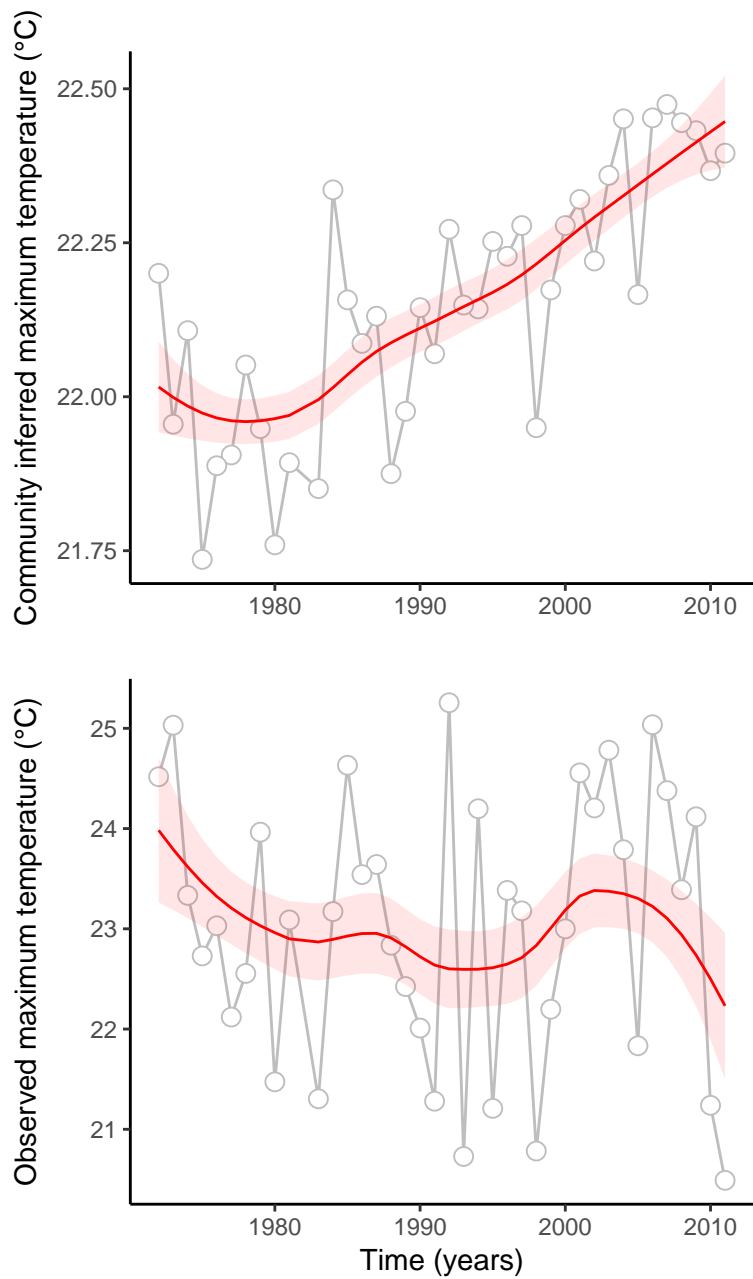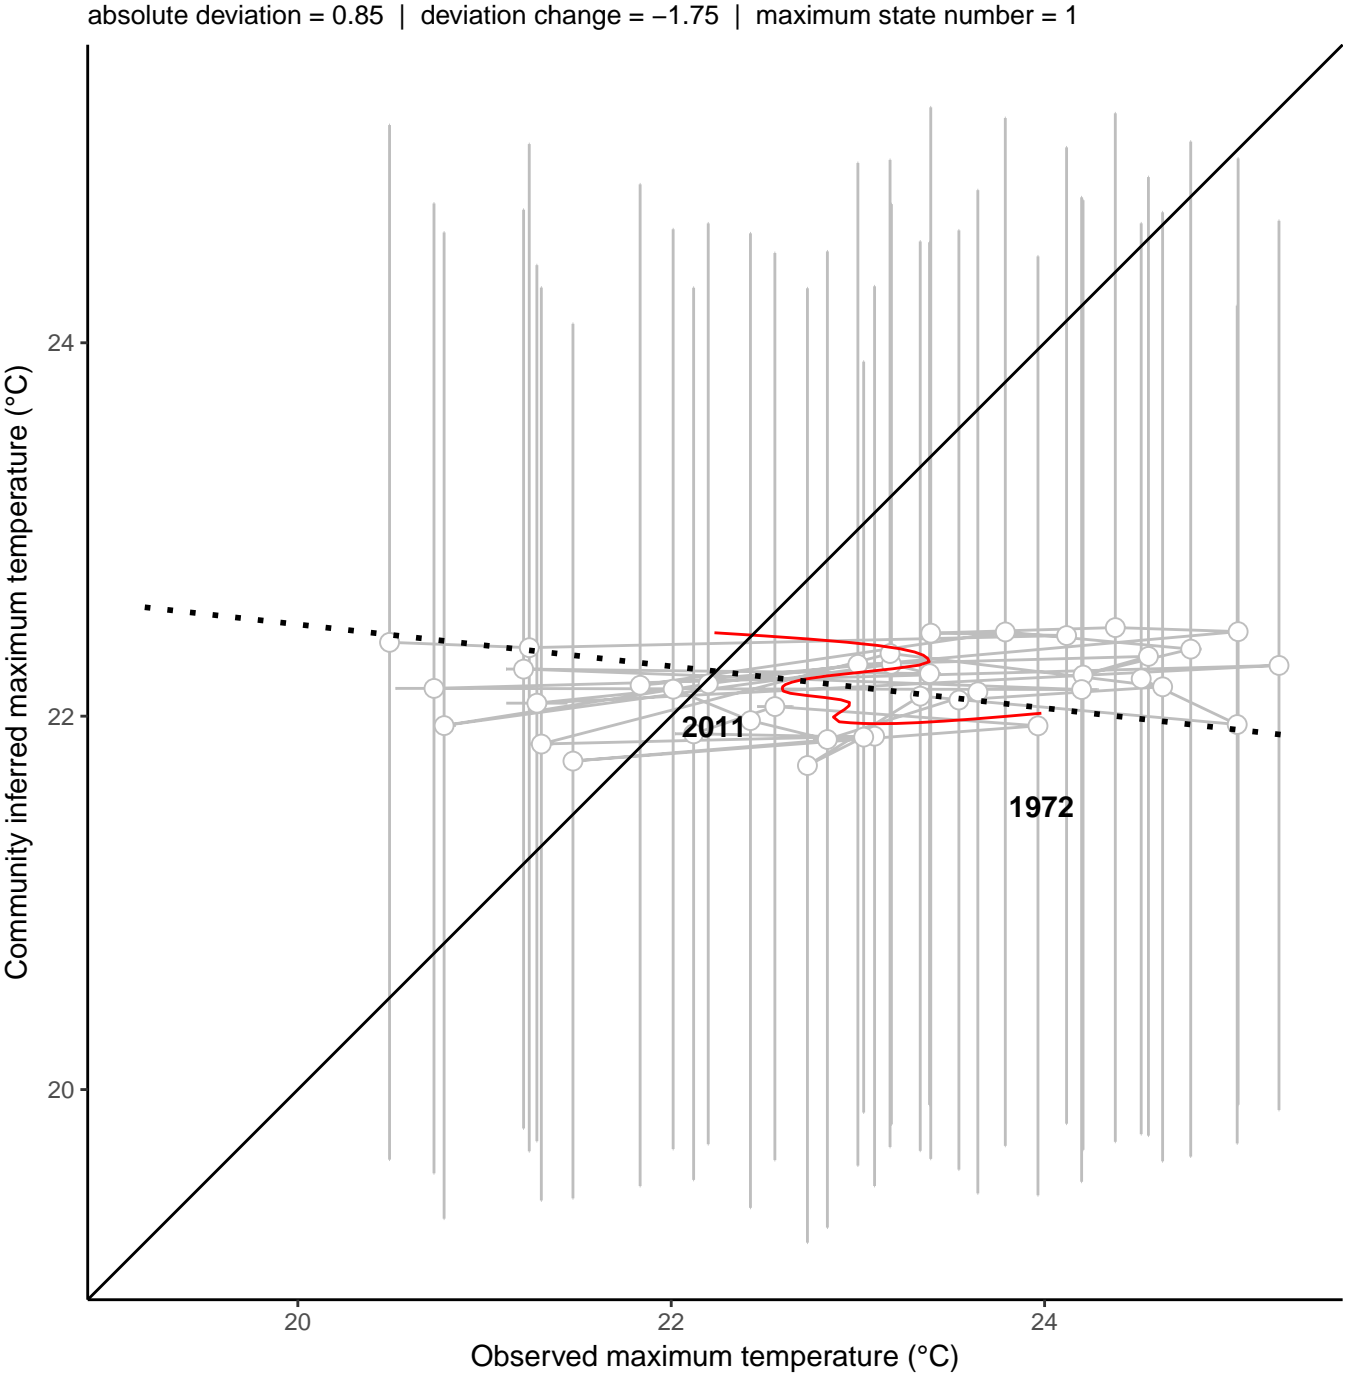

site : 840\_14\_201

absolute deviation = 3.72 | deviation change = 1.71 | maximum state number = 1

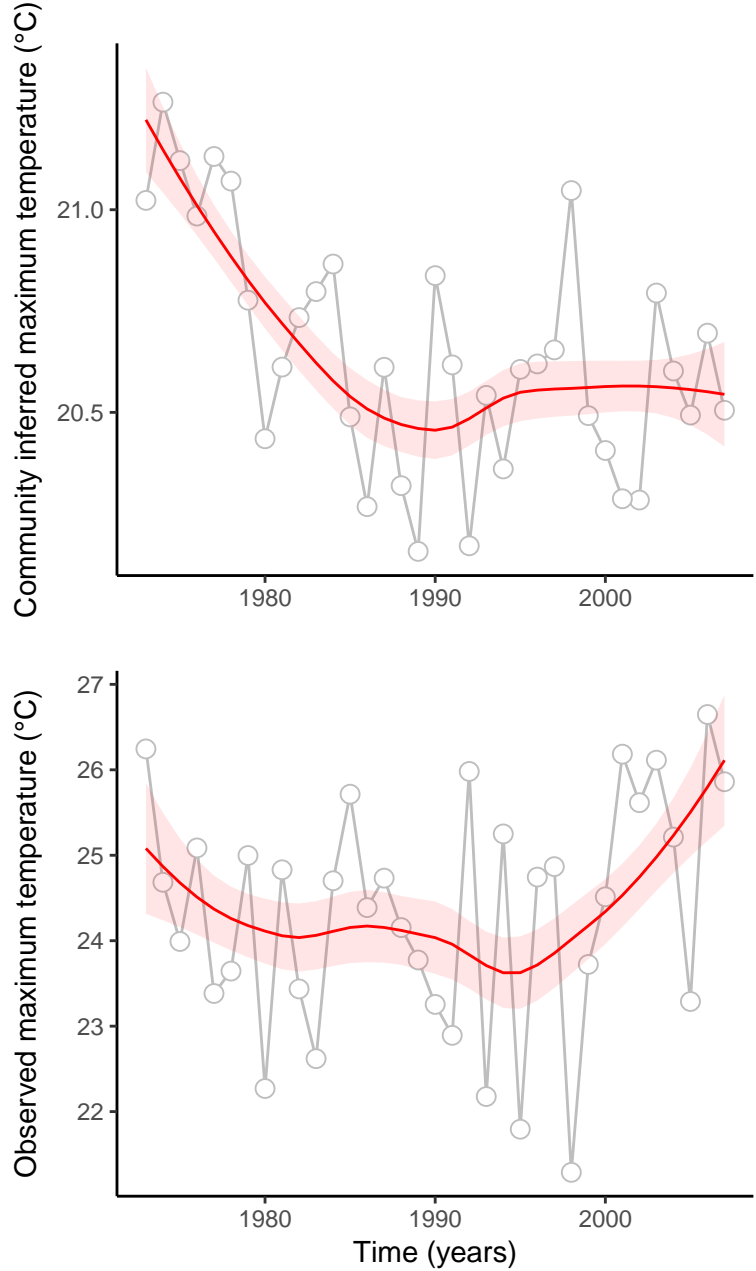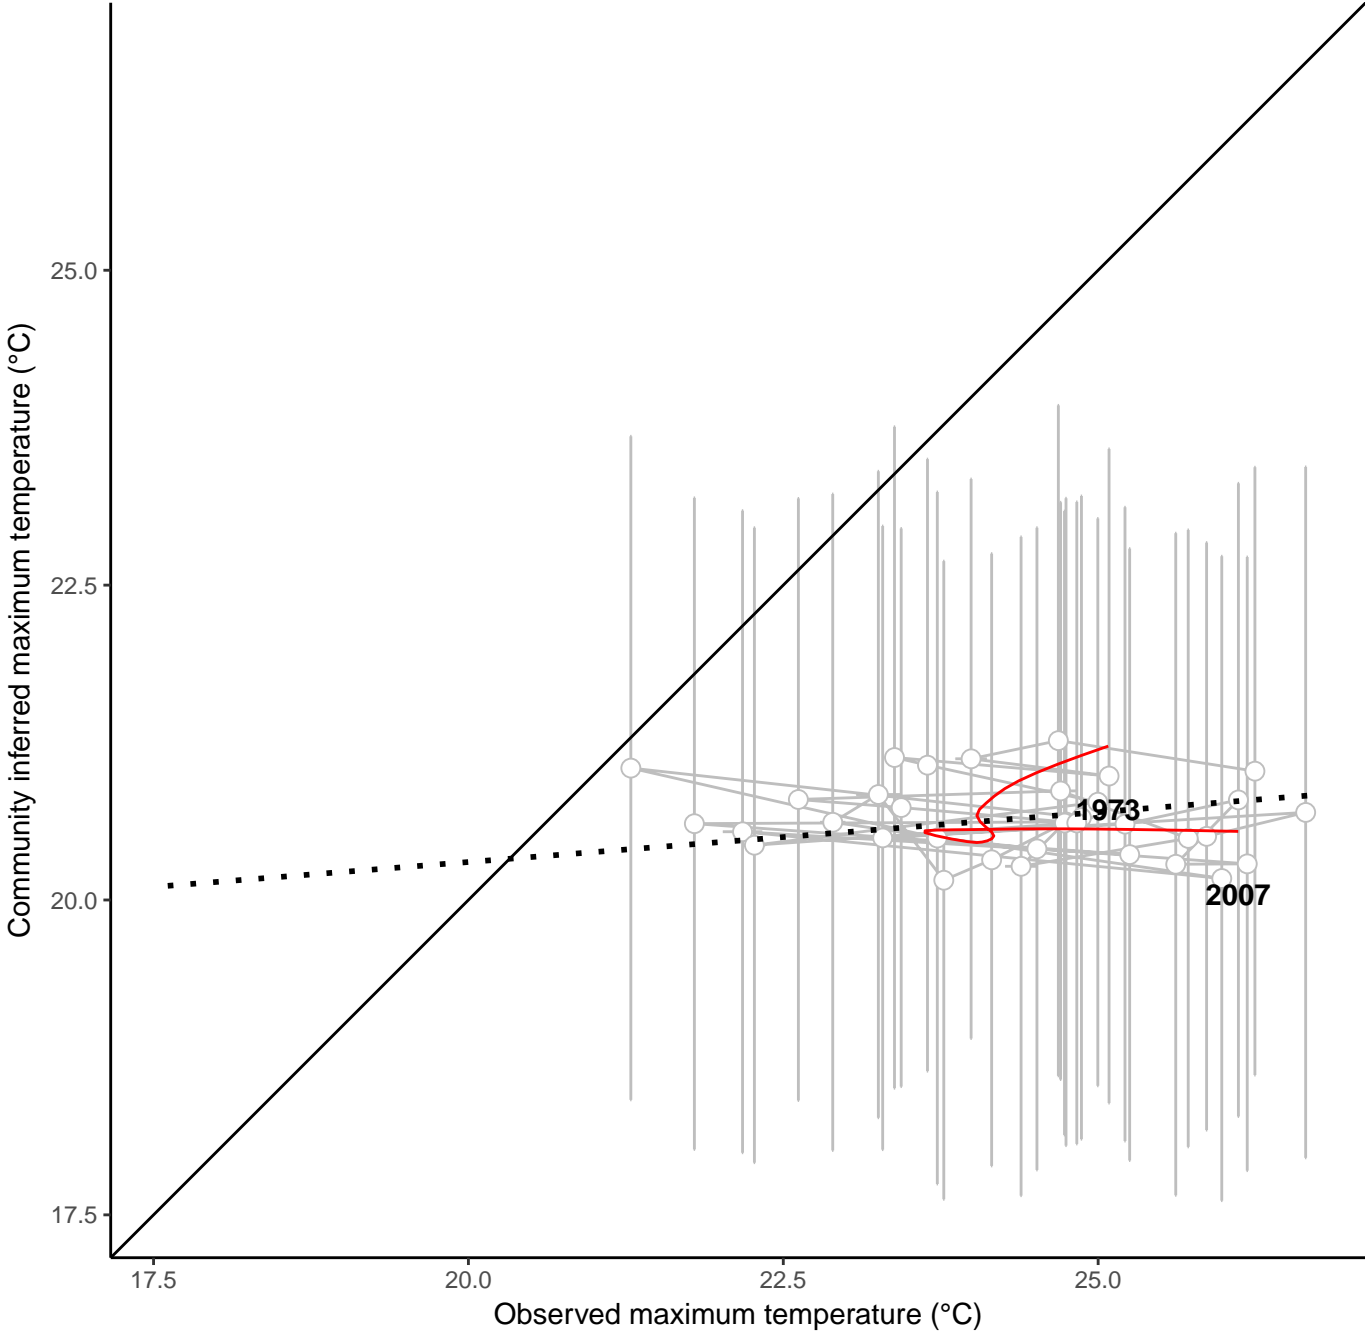



site : 840\_14\_21

absolute deviation = 7.88 | deviation change = 0.03 | maximum state number = 1

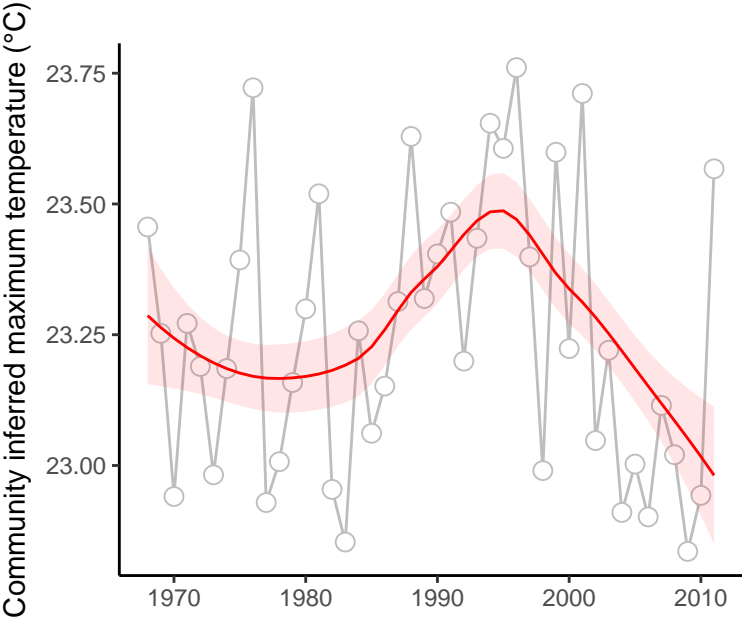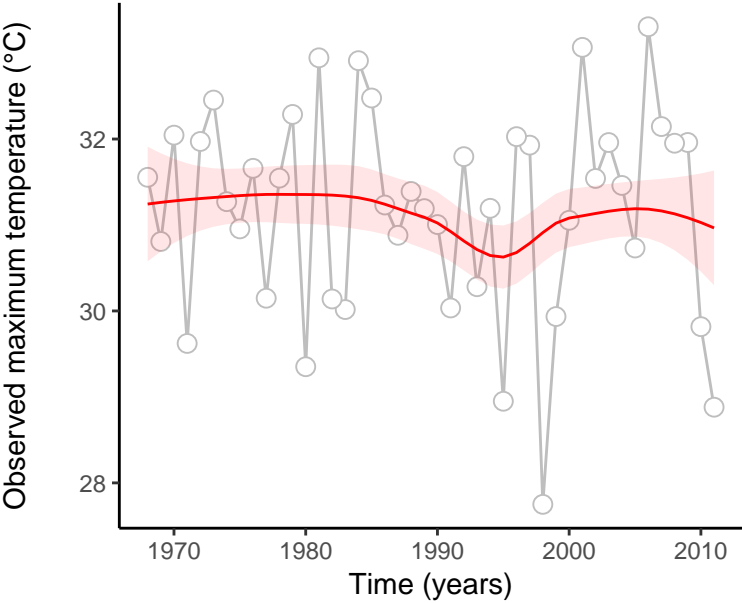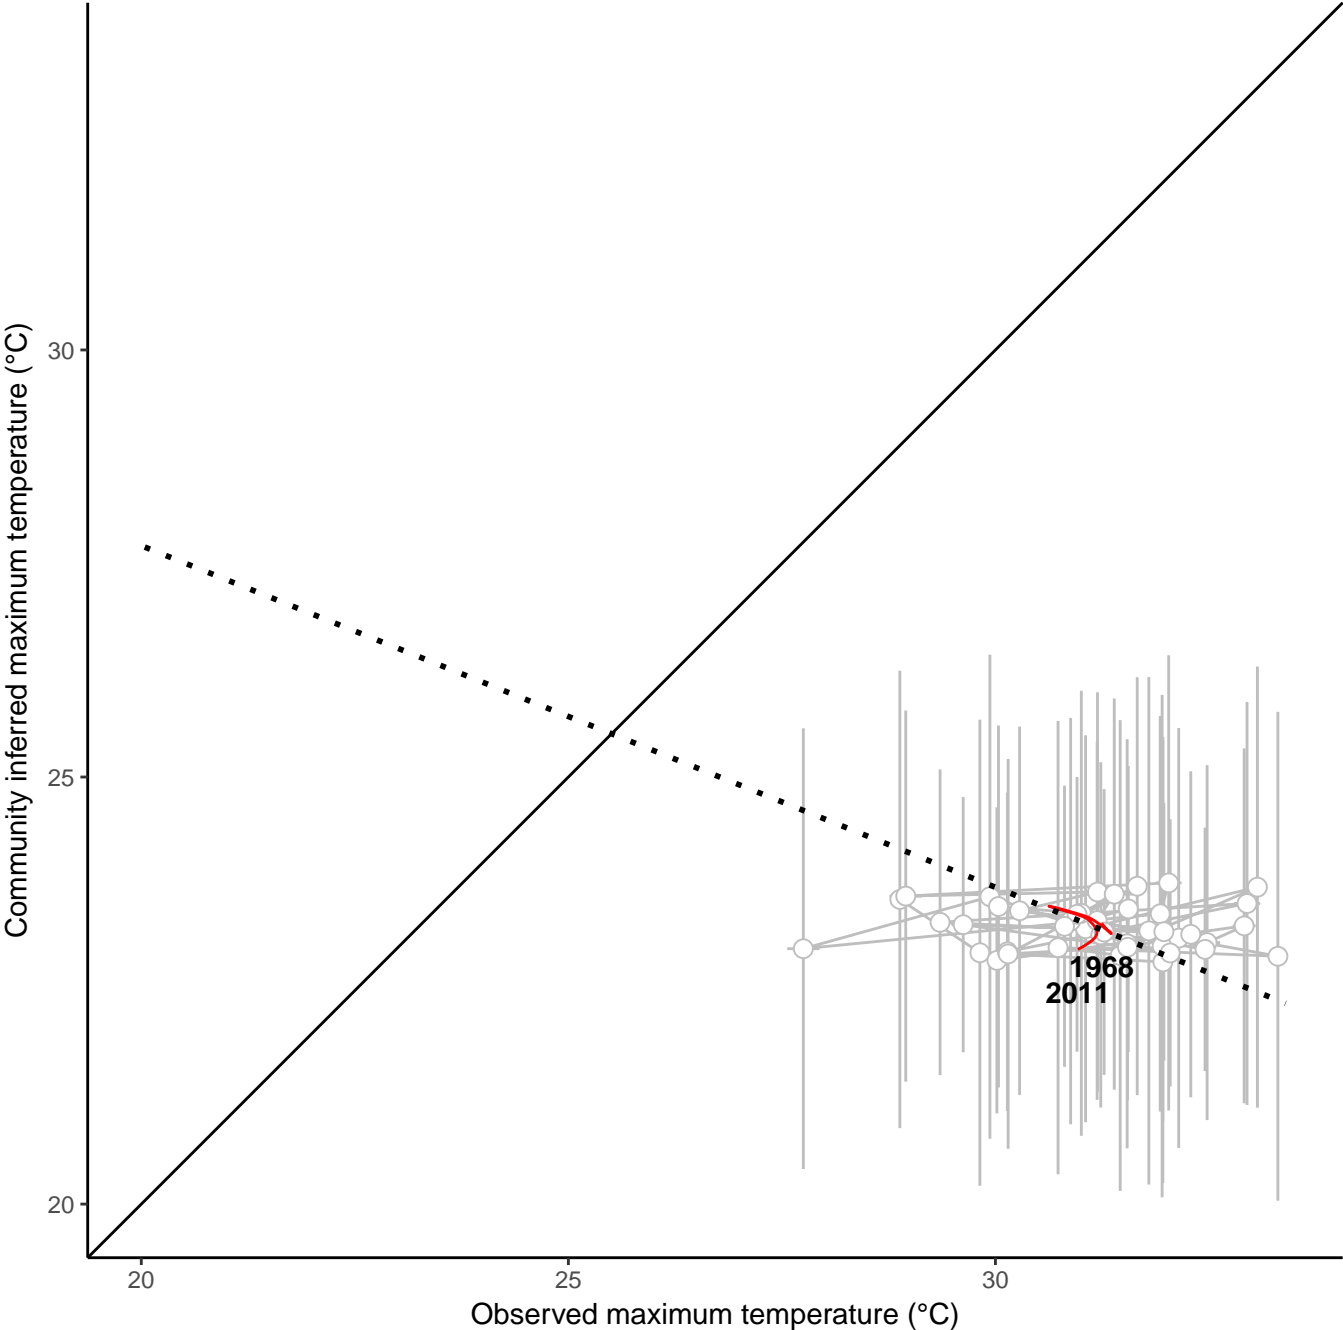

site : 840\_21\_1

absolute deviation = 3.04 | deviation change = 2.15 | maximum state number = 2

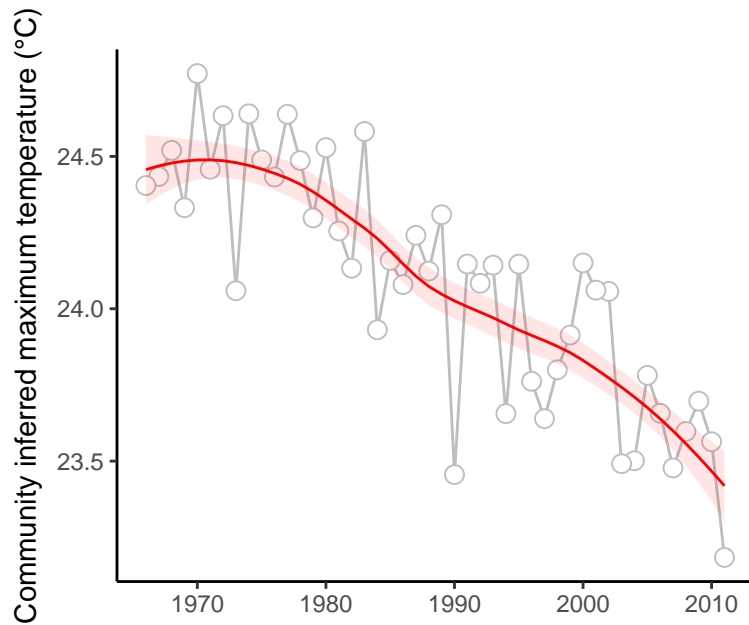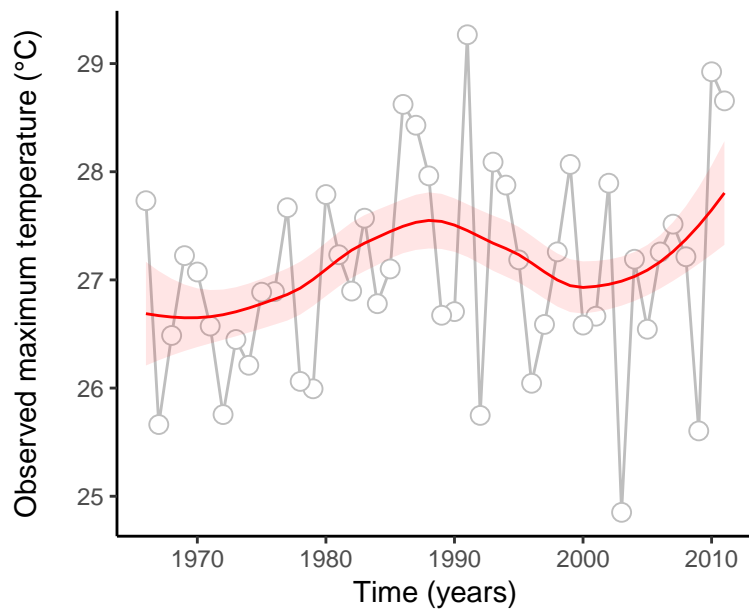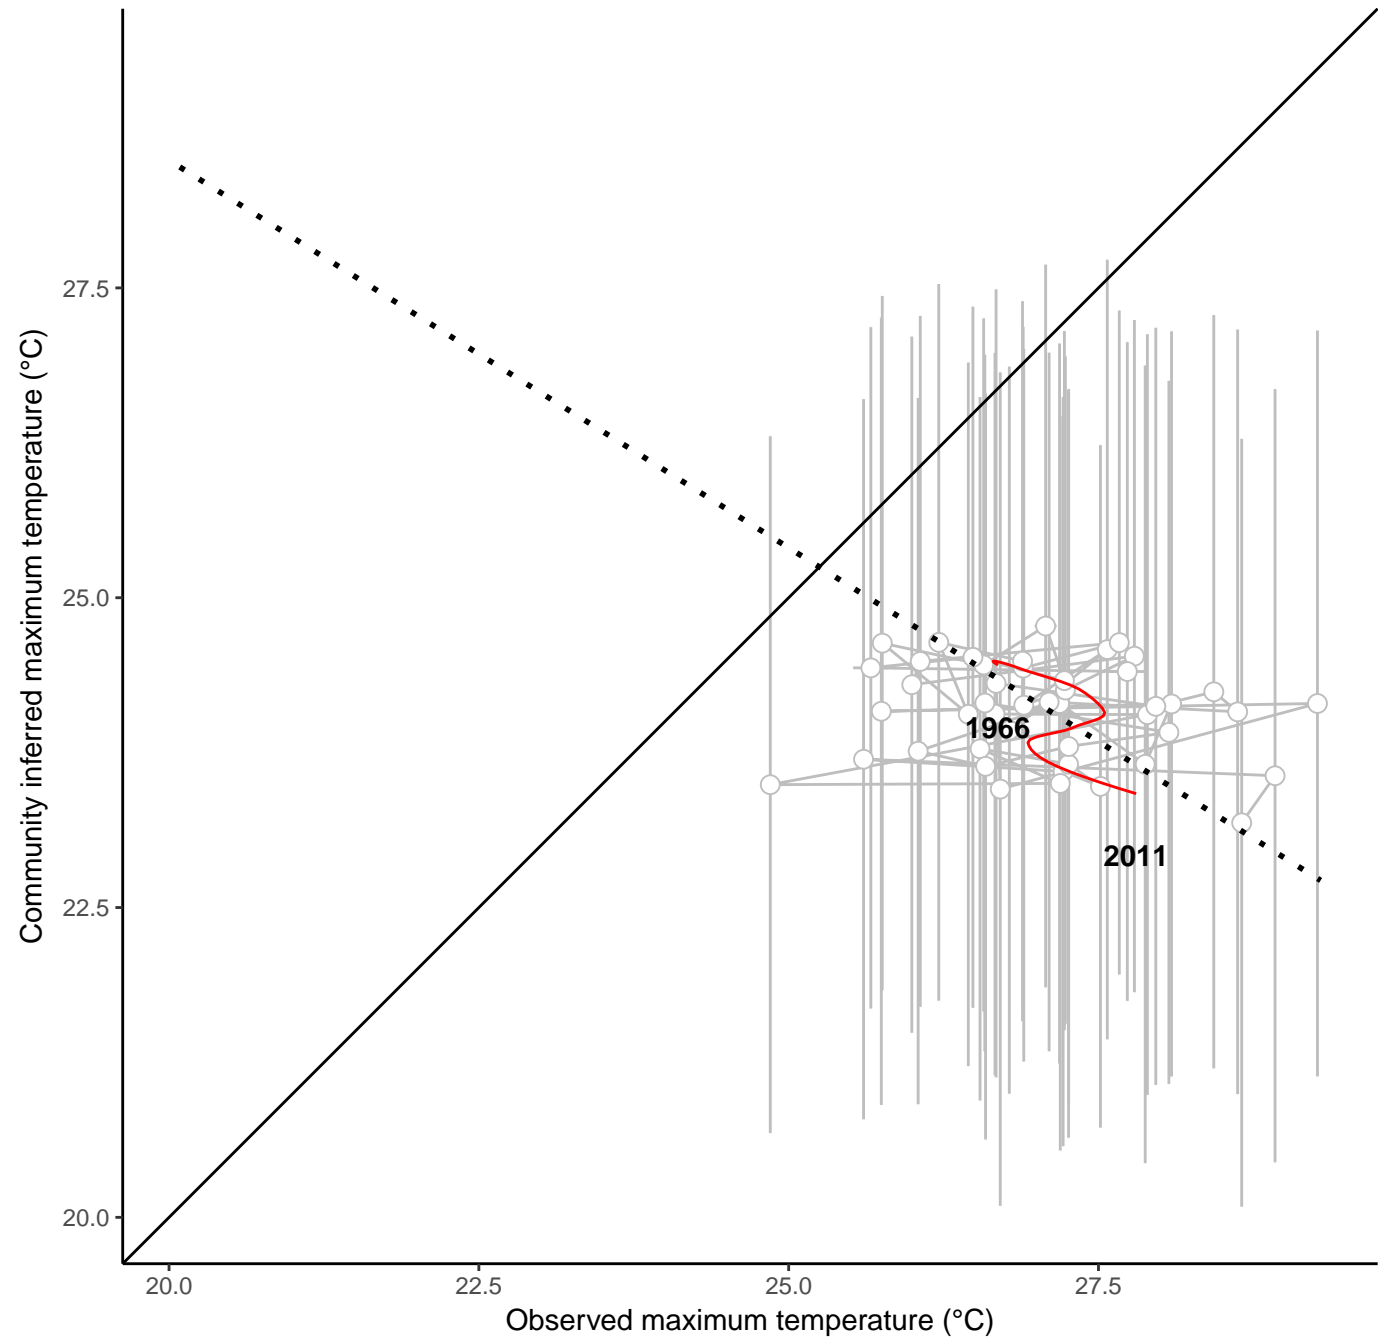

site : 840\_21\_3

absolute deviation = 2.97 | deviation change = 1.36 | maximum state number = 1

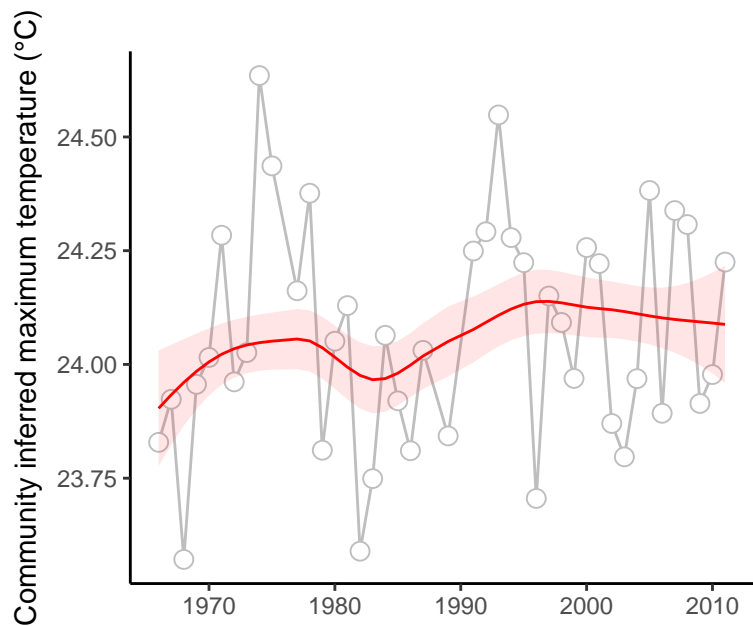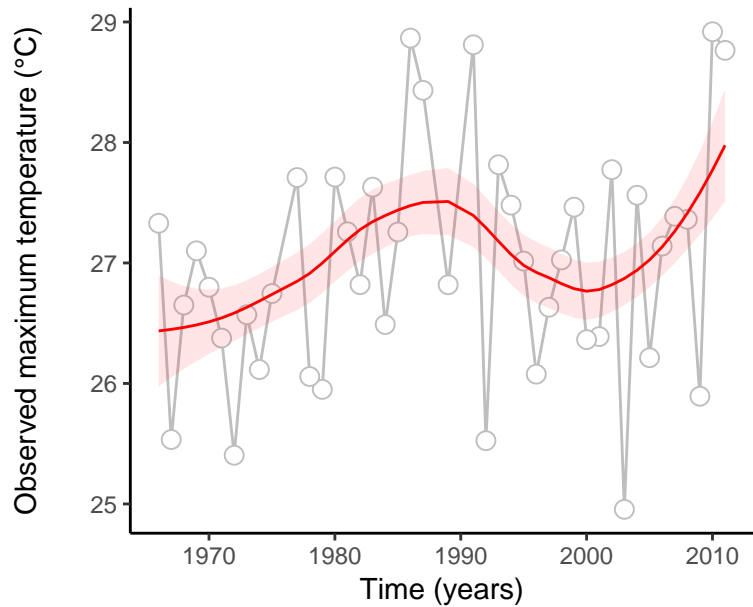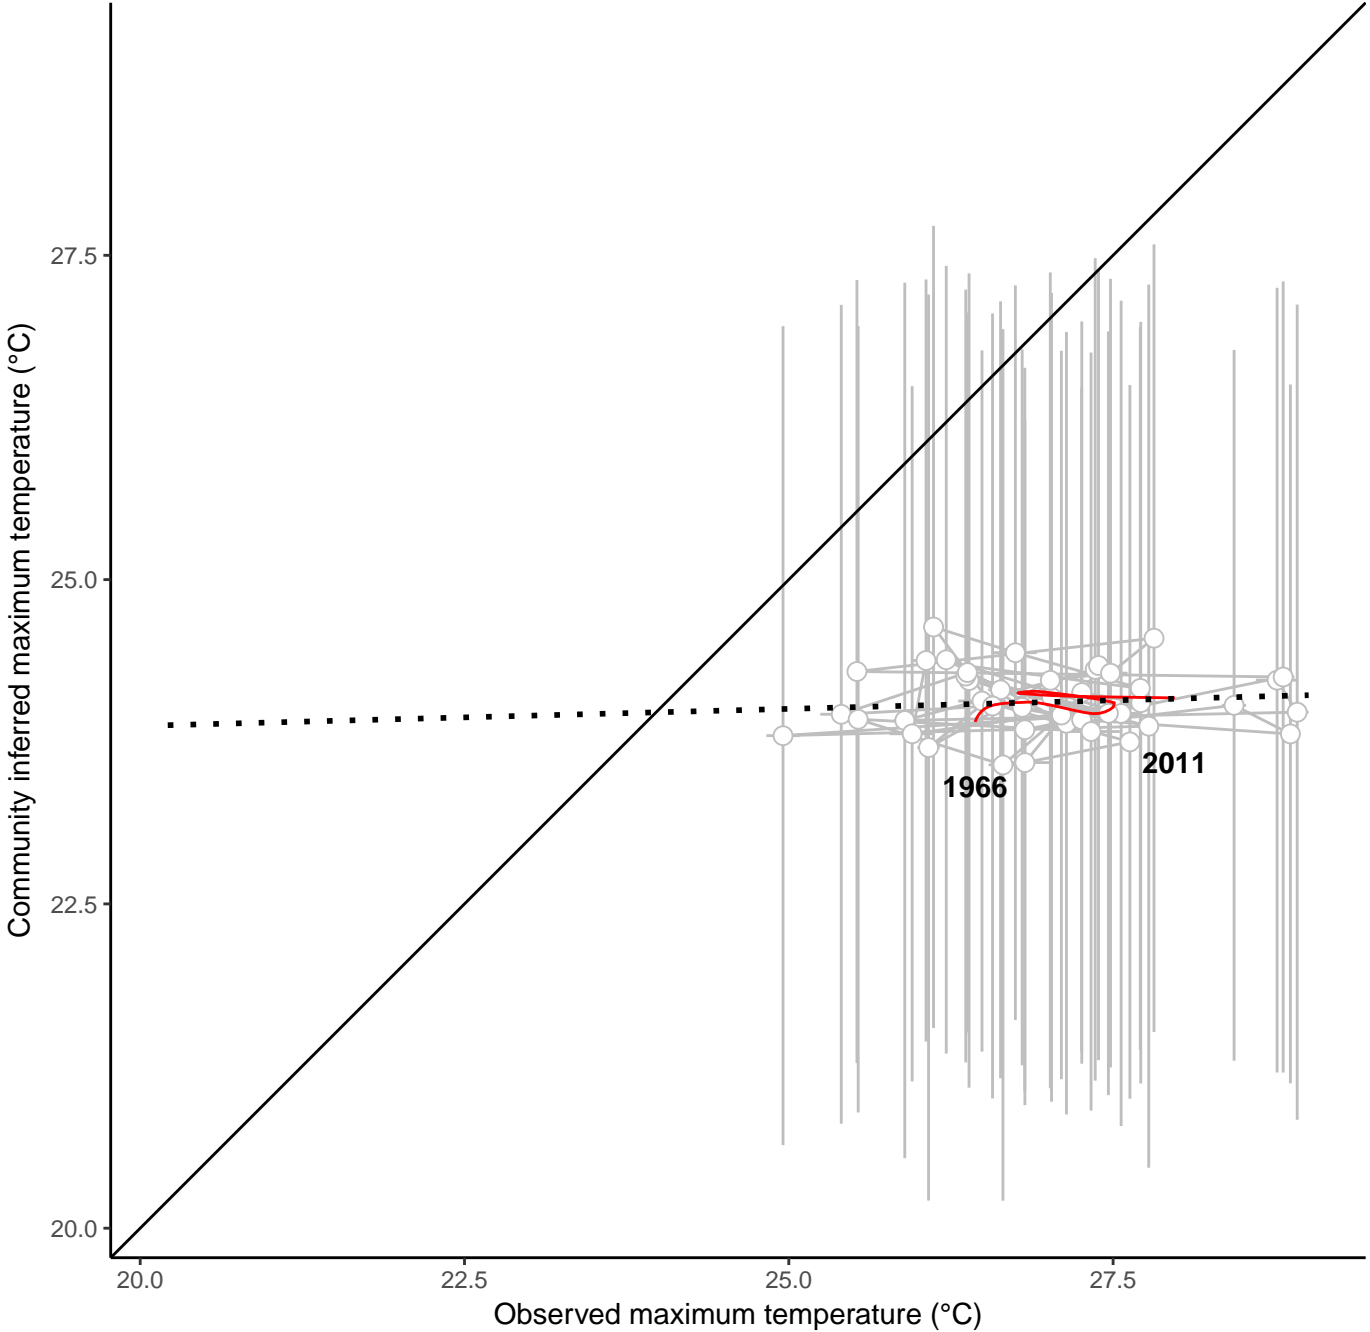

site : 840\_25\_3

absolute deviation = 4.75 | deviation change = 0.99 | maximum state number = 2

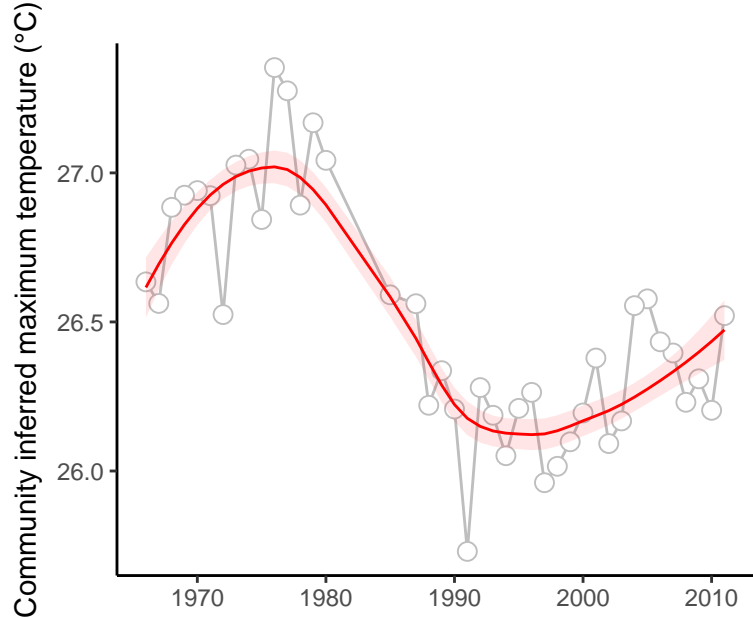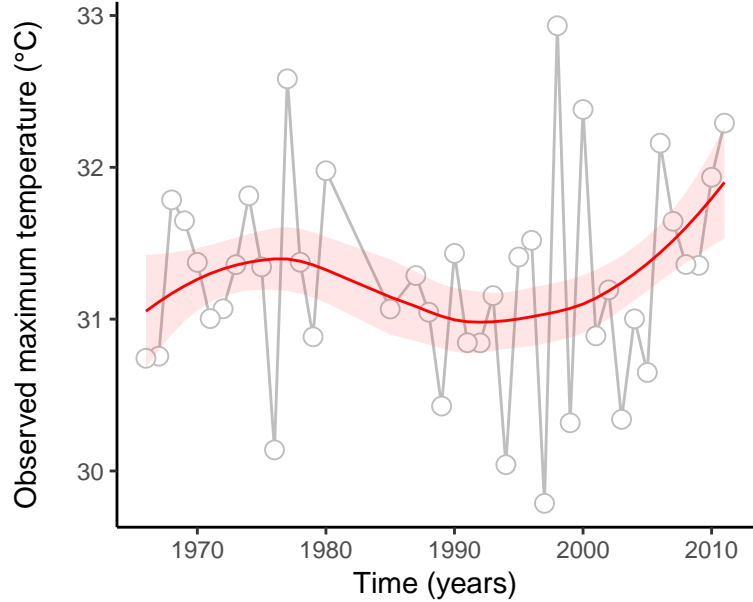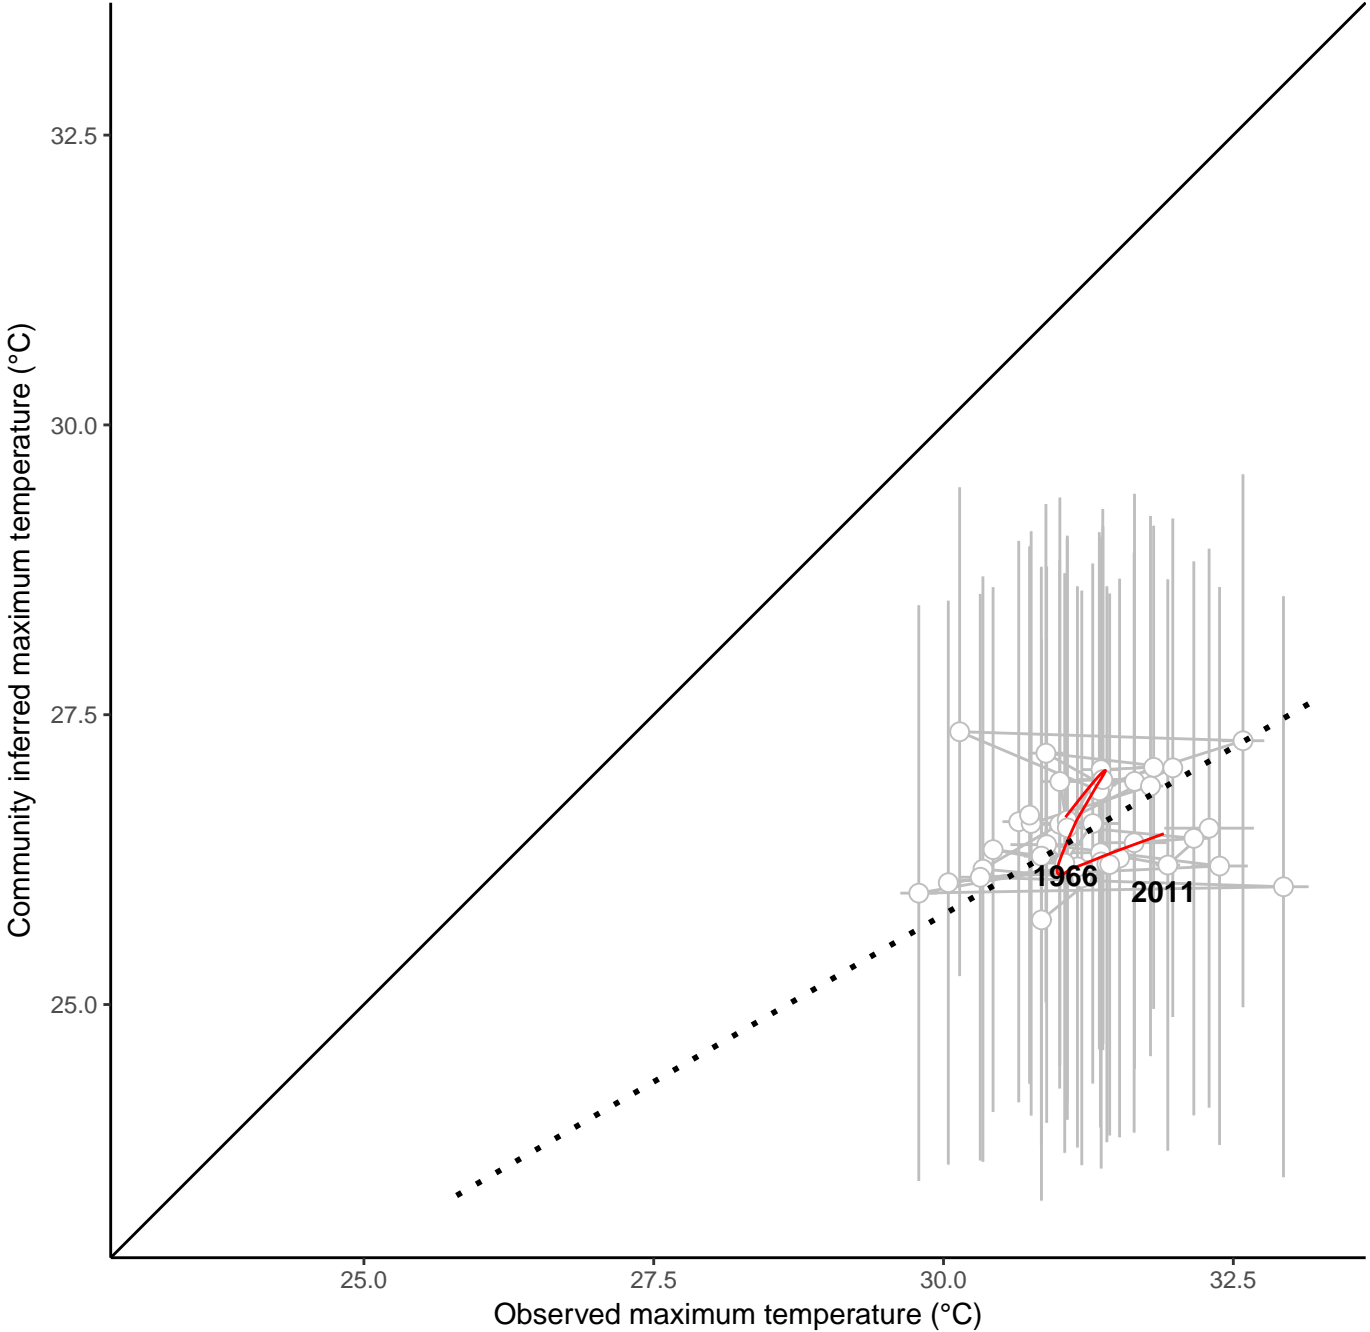

site : 840\_46\_5

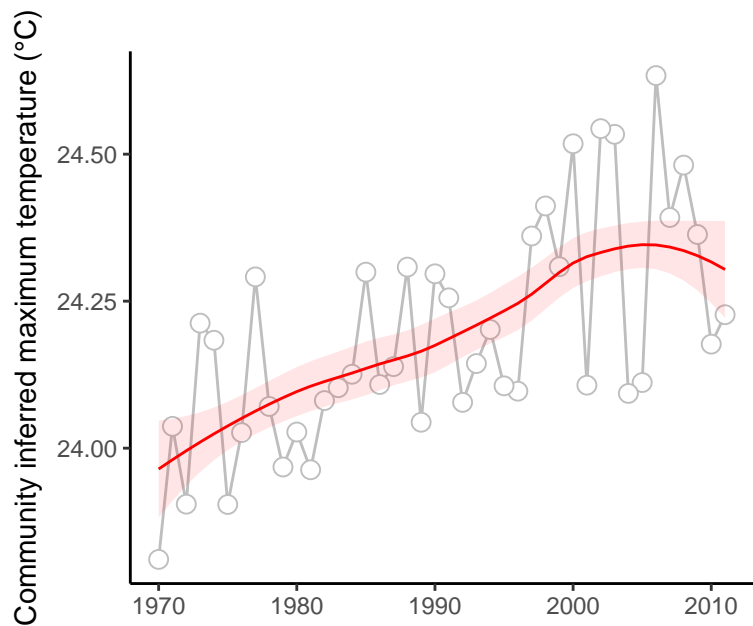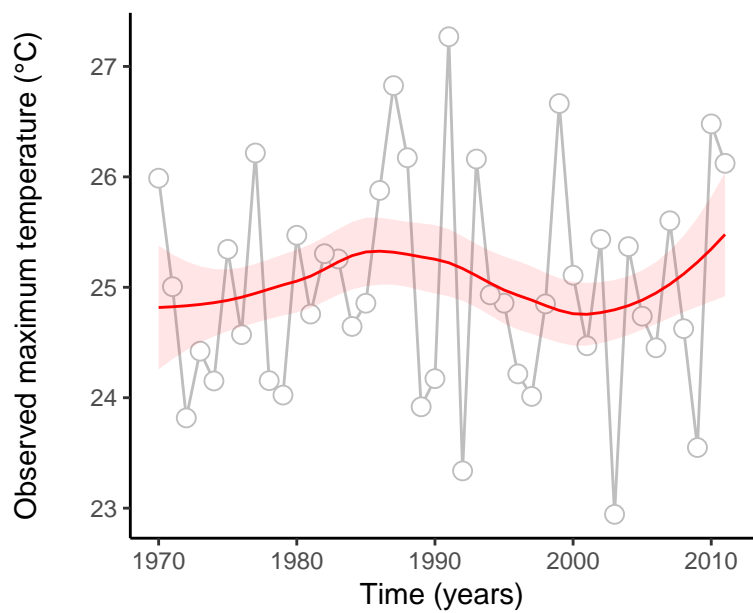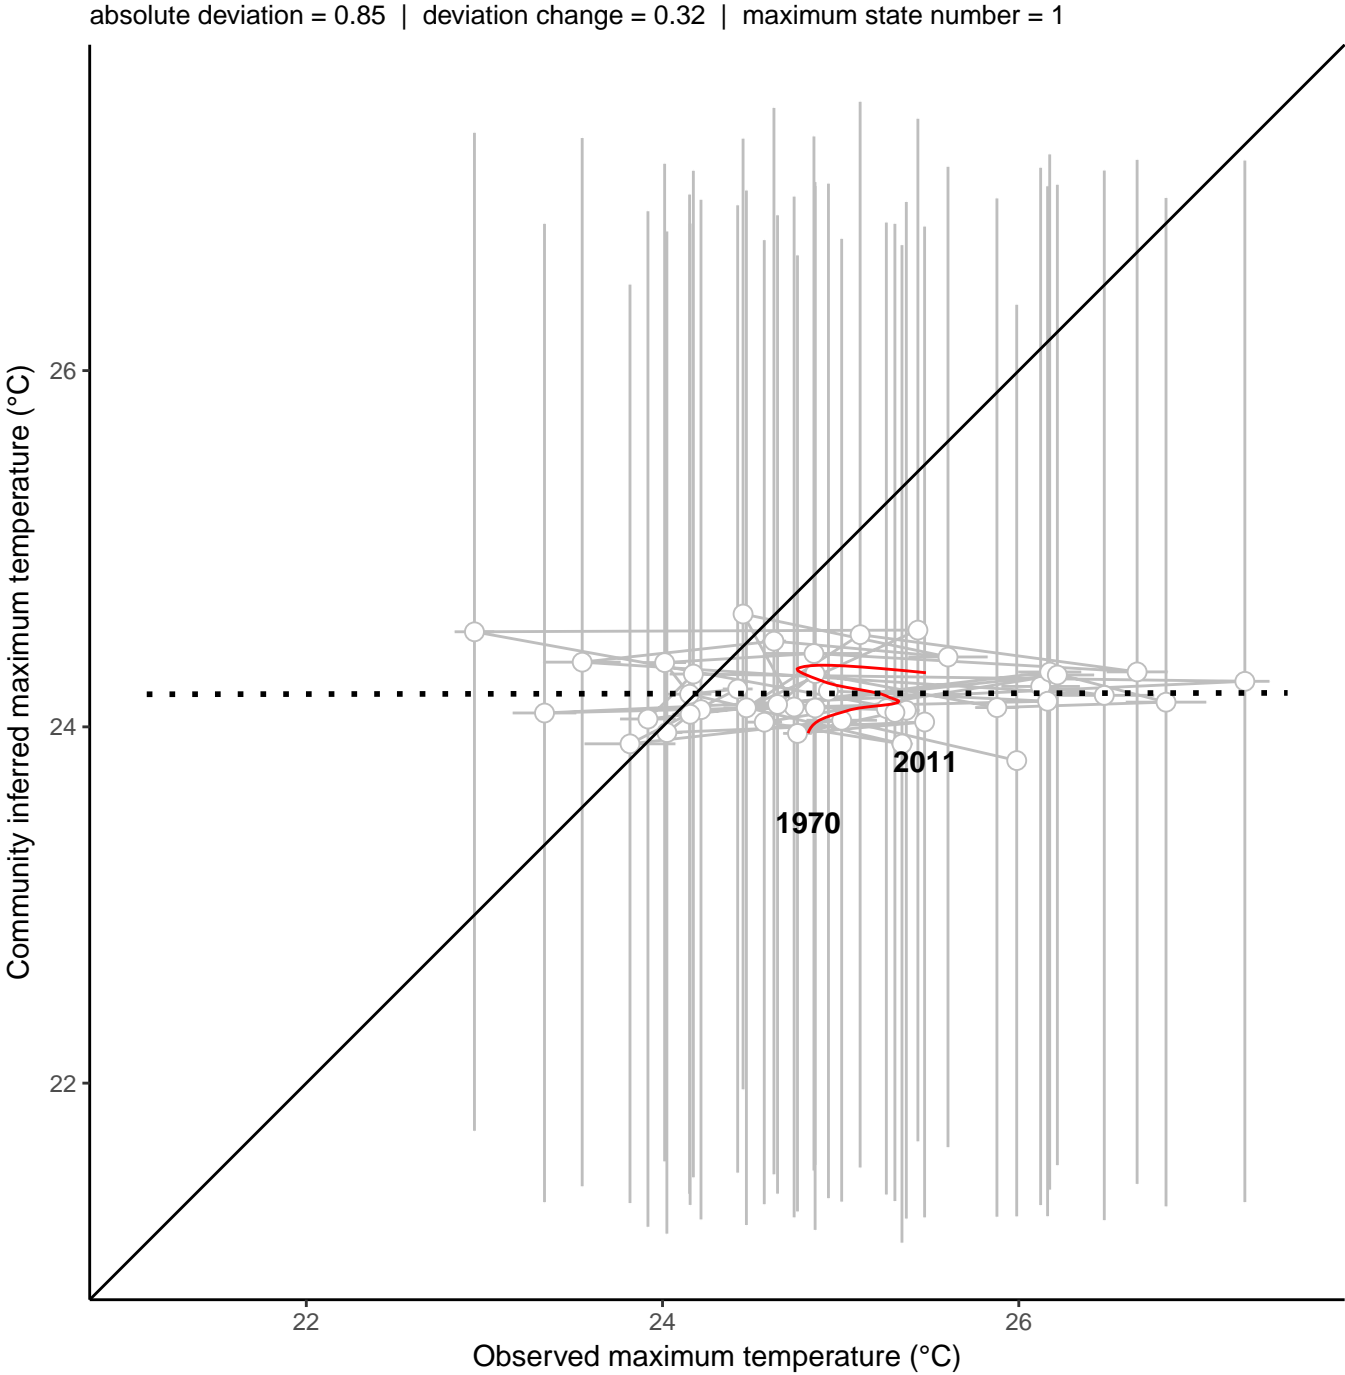

site : 840\_47\_17

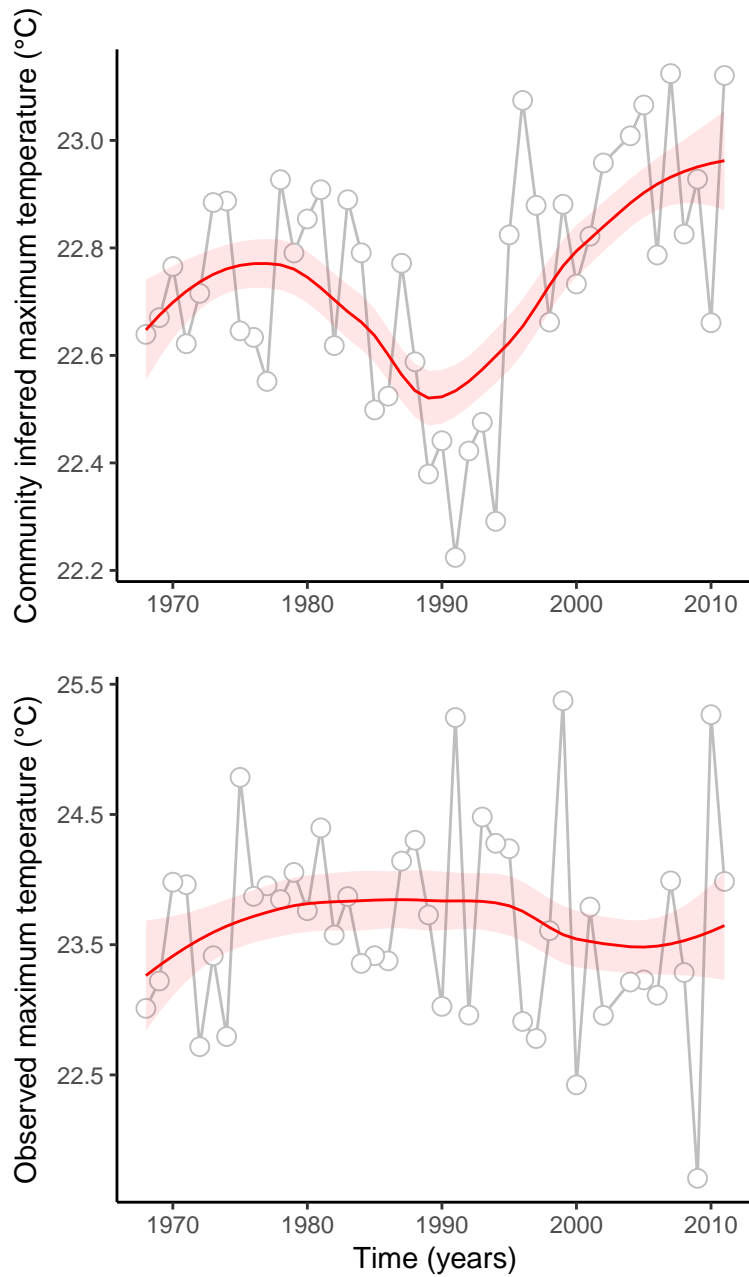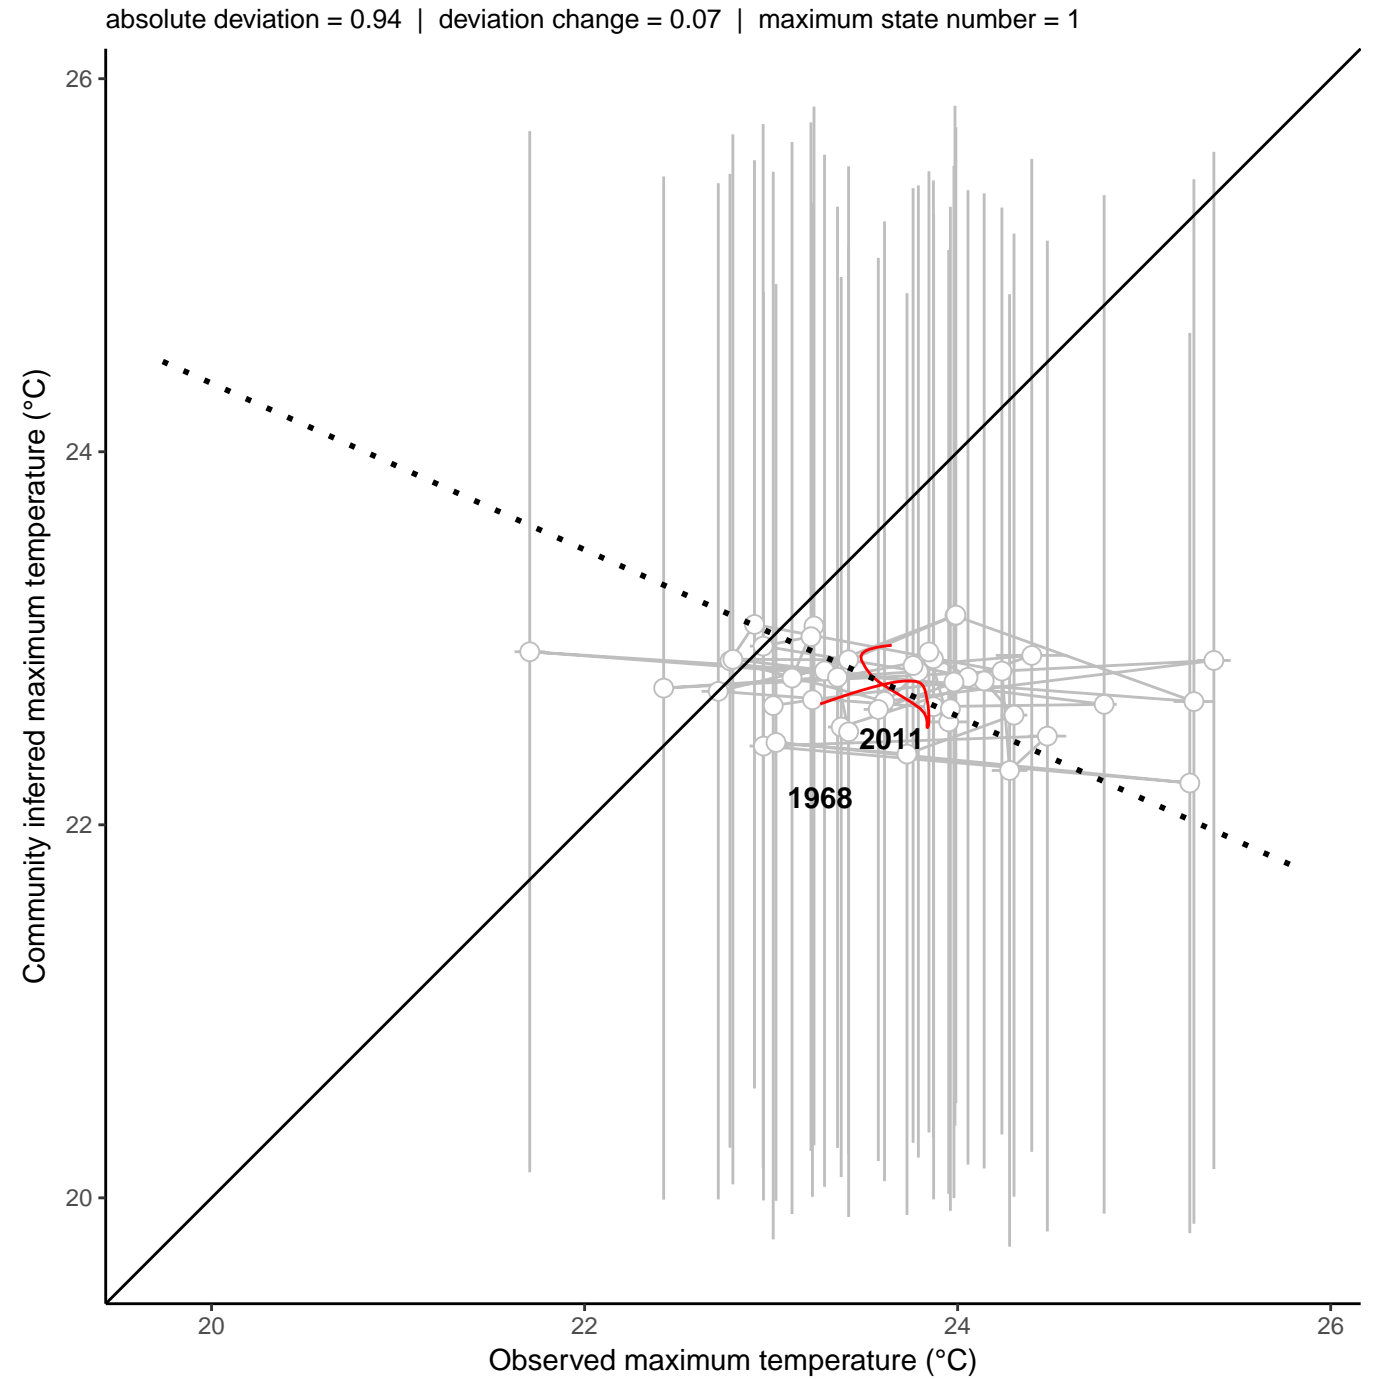

site : 840\_63\_12

absolute deviation = 3.97 | deviation change = 1.52 | maximum state number = 1

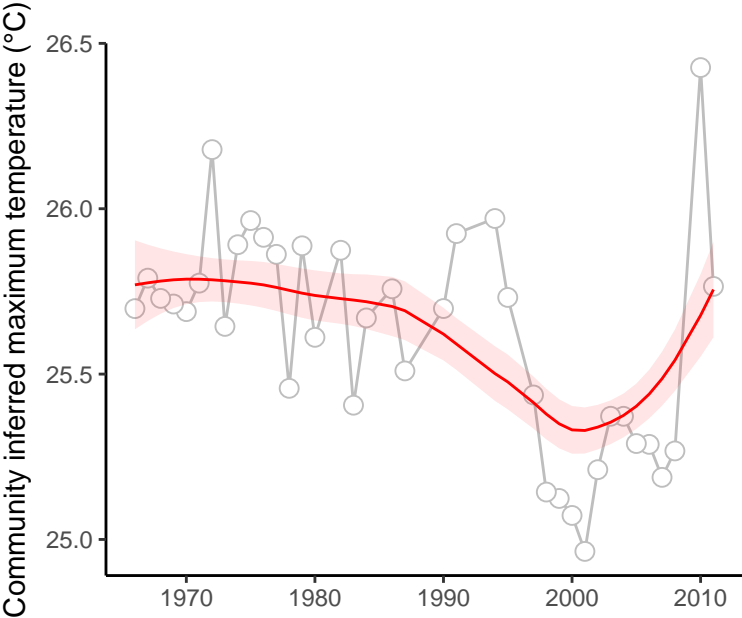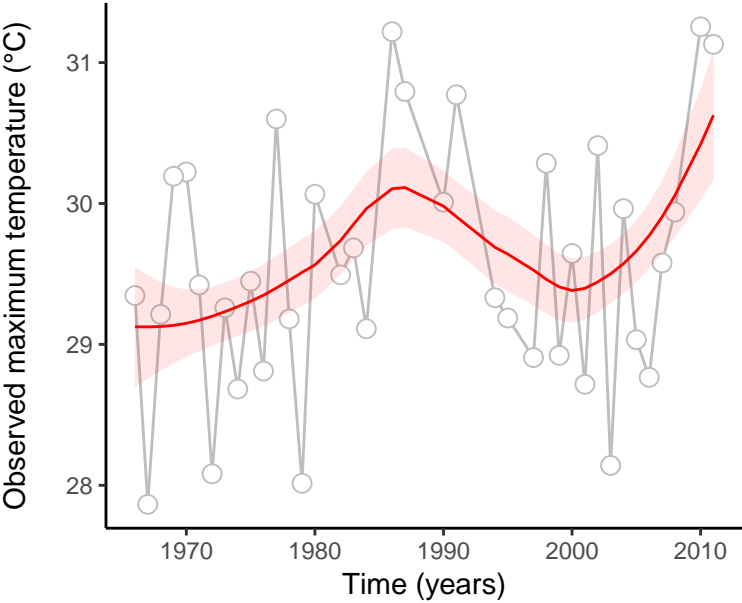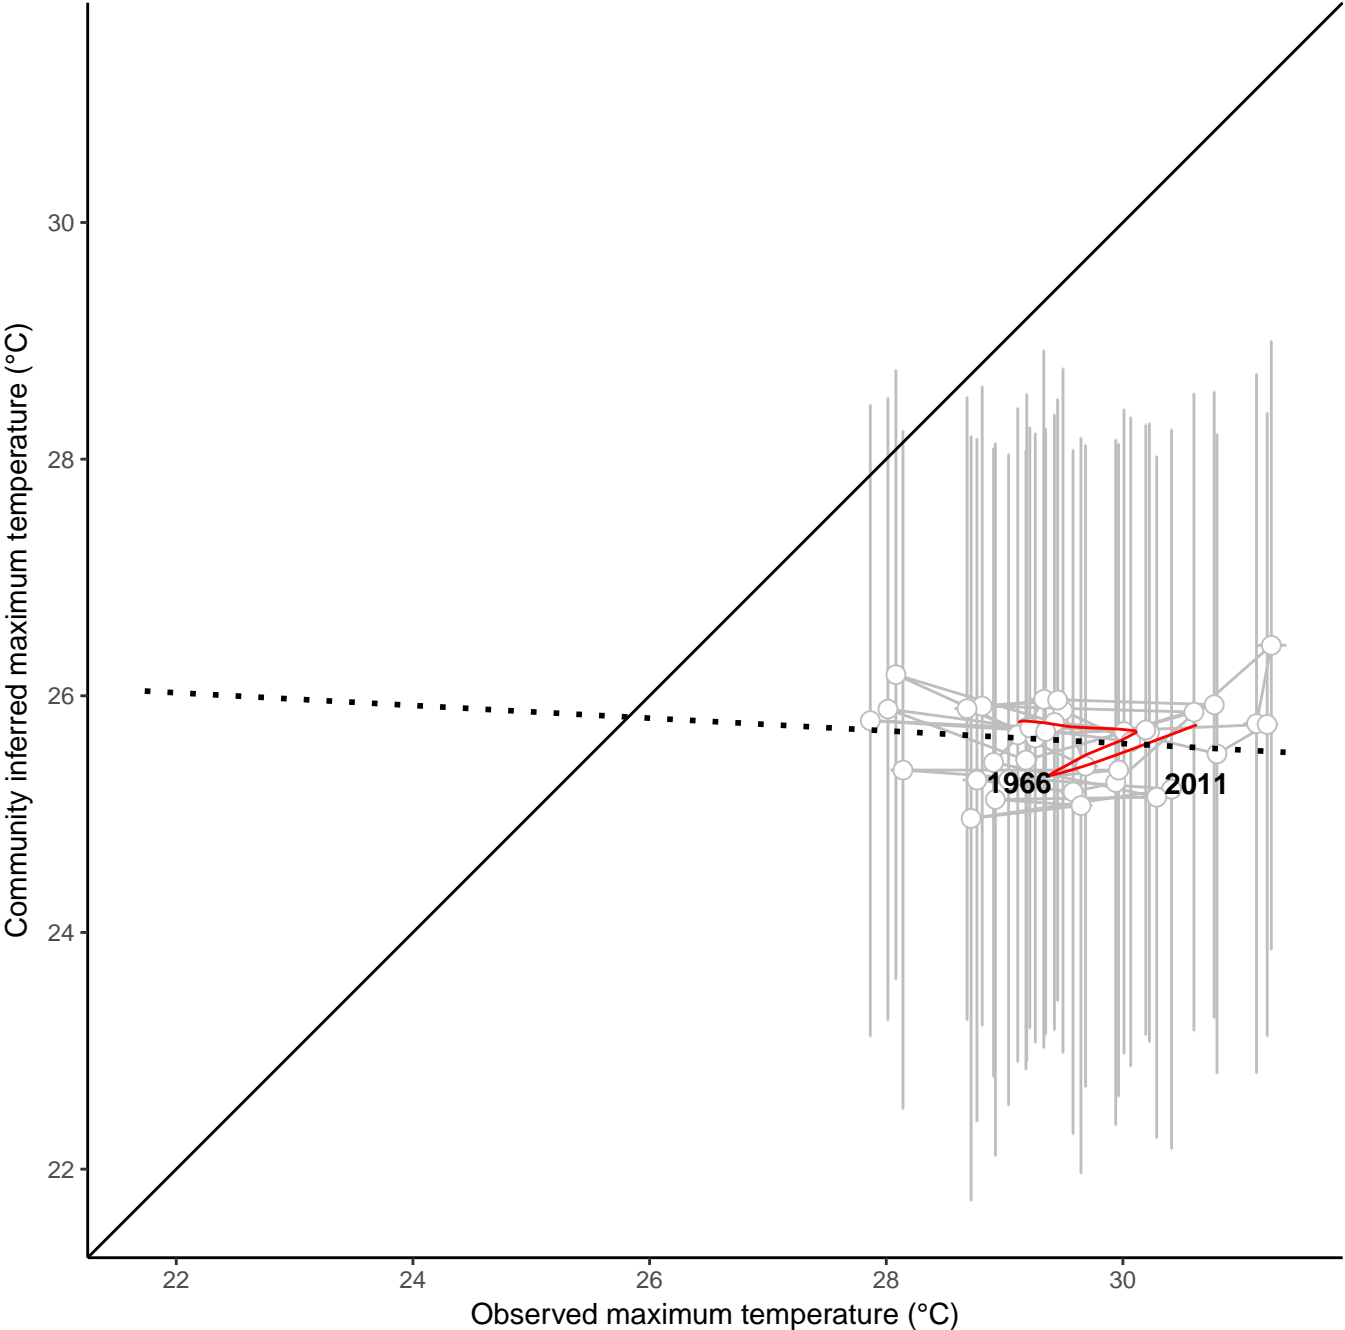

site : 840\_64\_28

absolute deviation = 0.83 | deviation change = 0.35 | maximum state number = 1

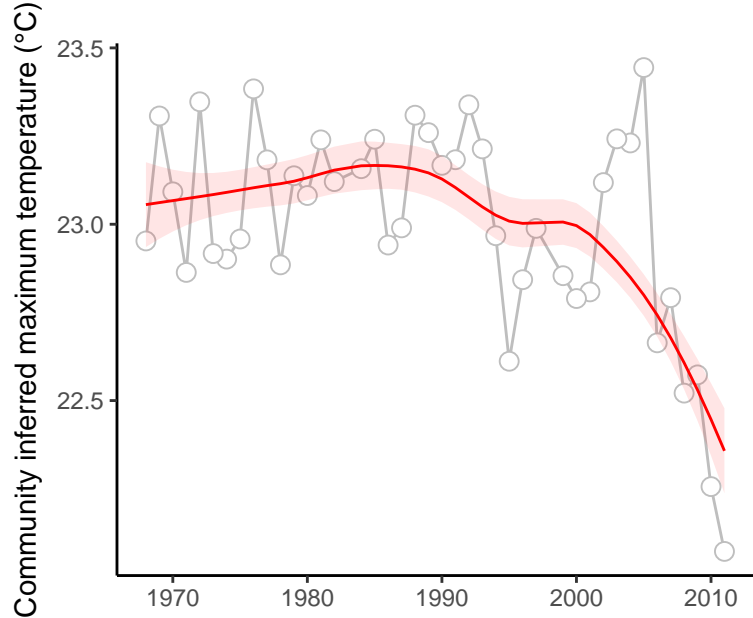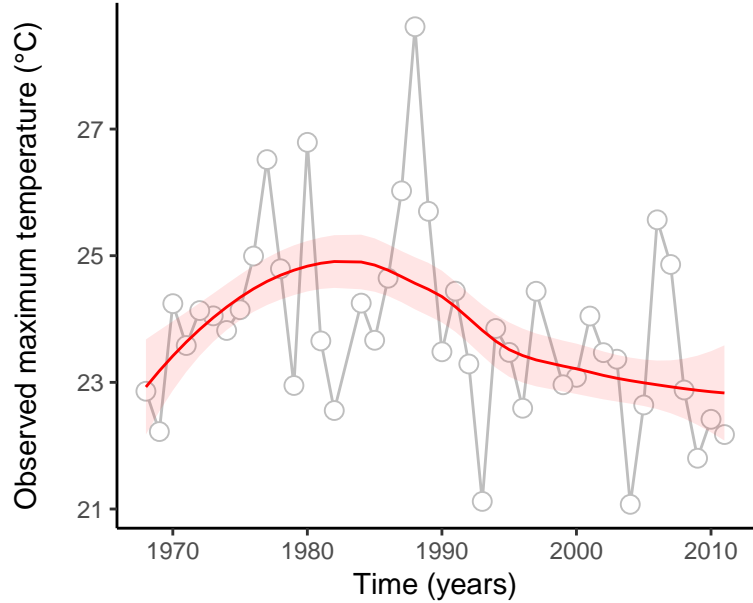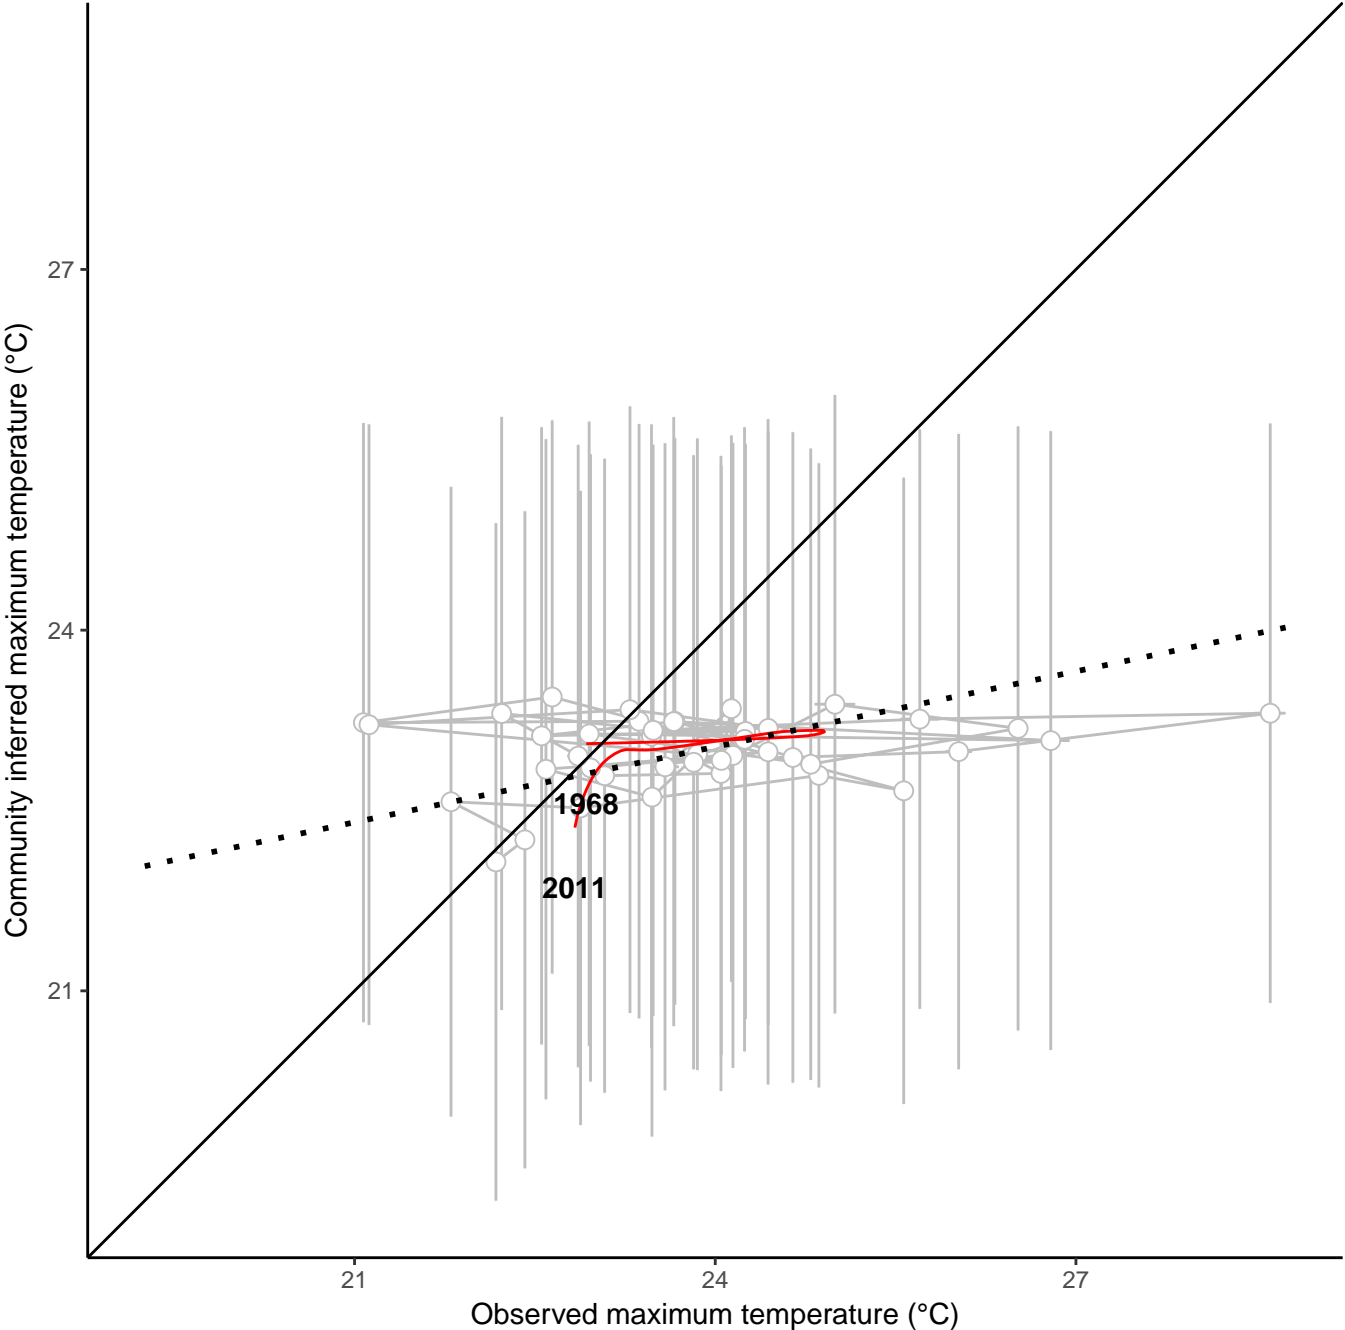



site : 840\_69\_33

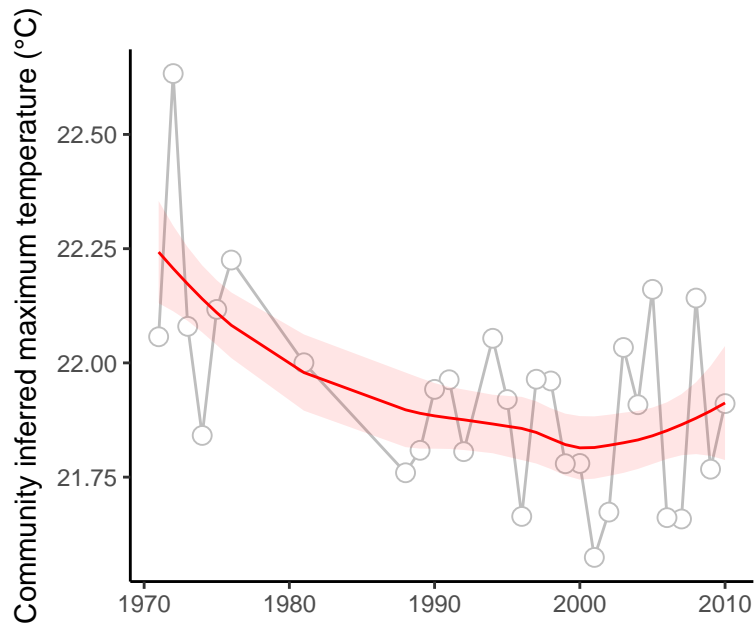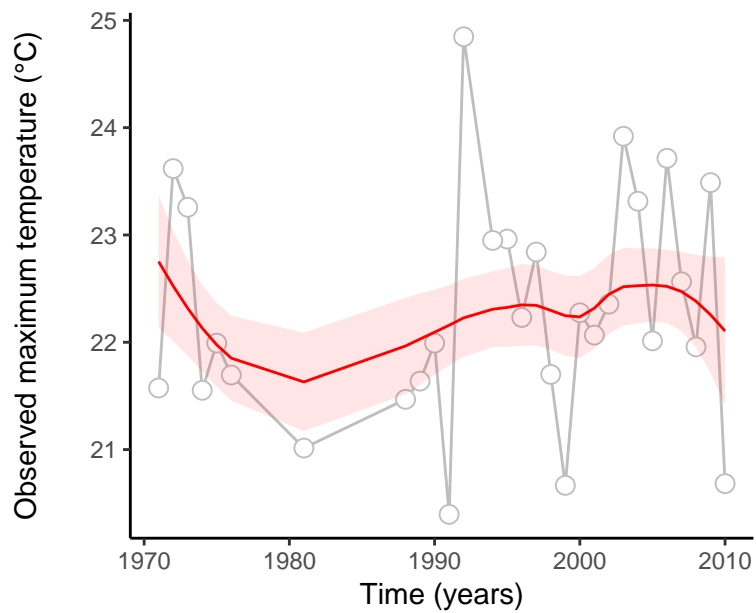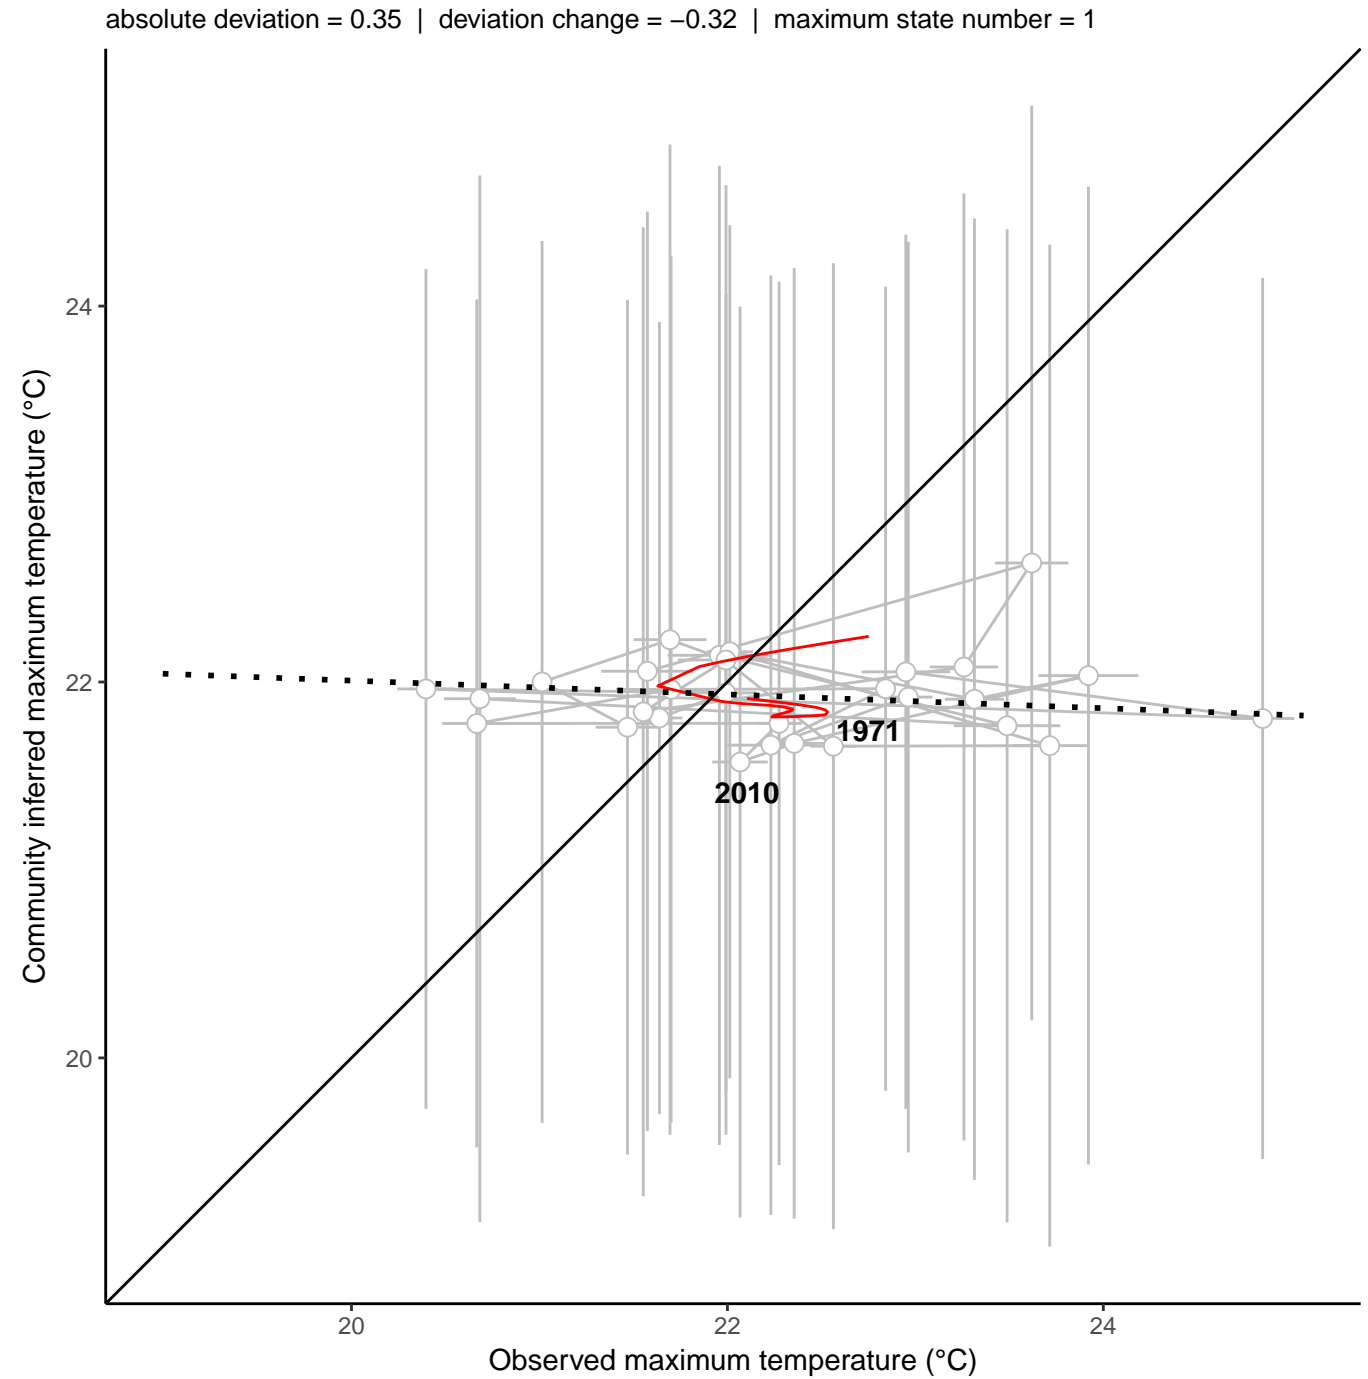

site : 840\_69\_8

absolute deviation = 1.16 | deviation change = 0.79 | maximum state number = 1

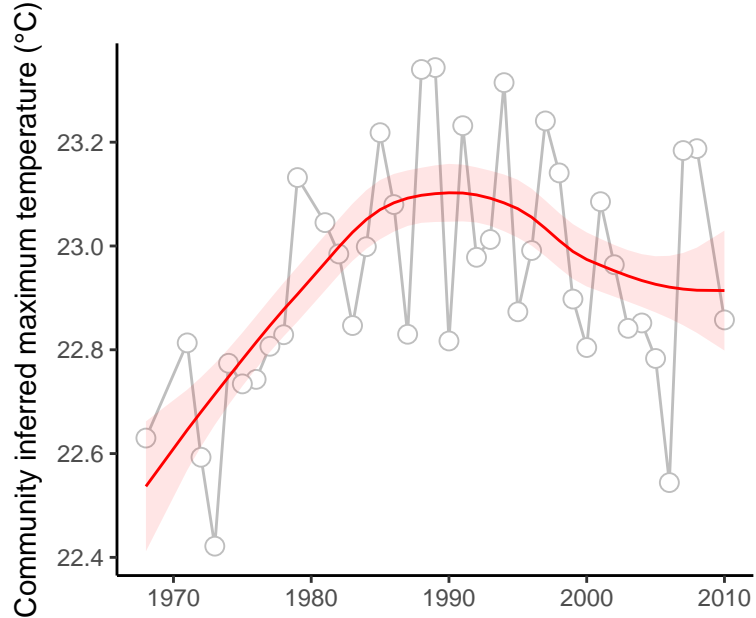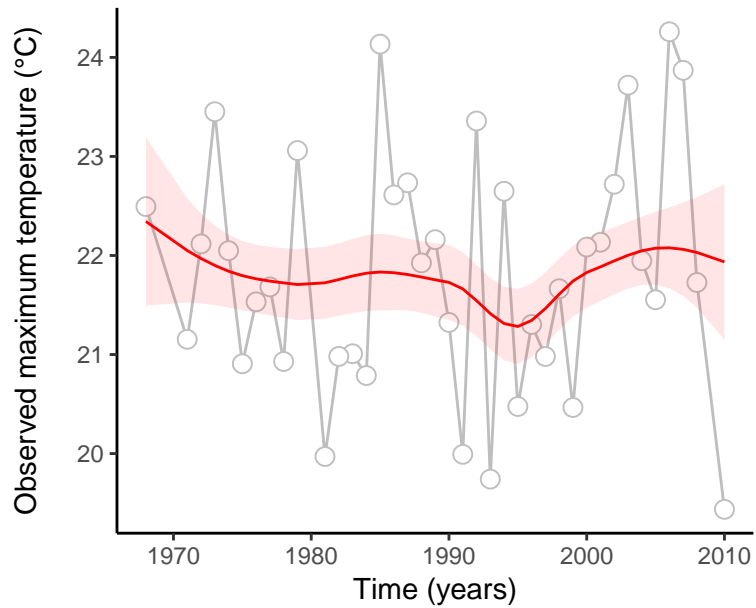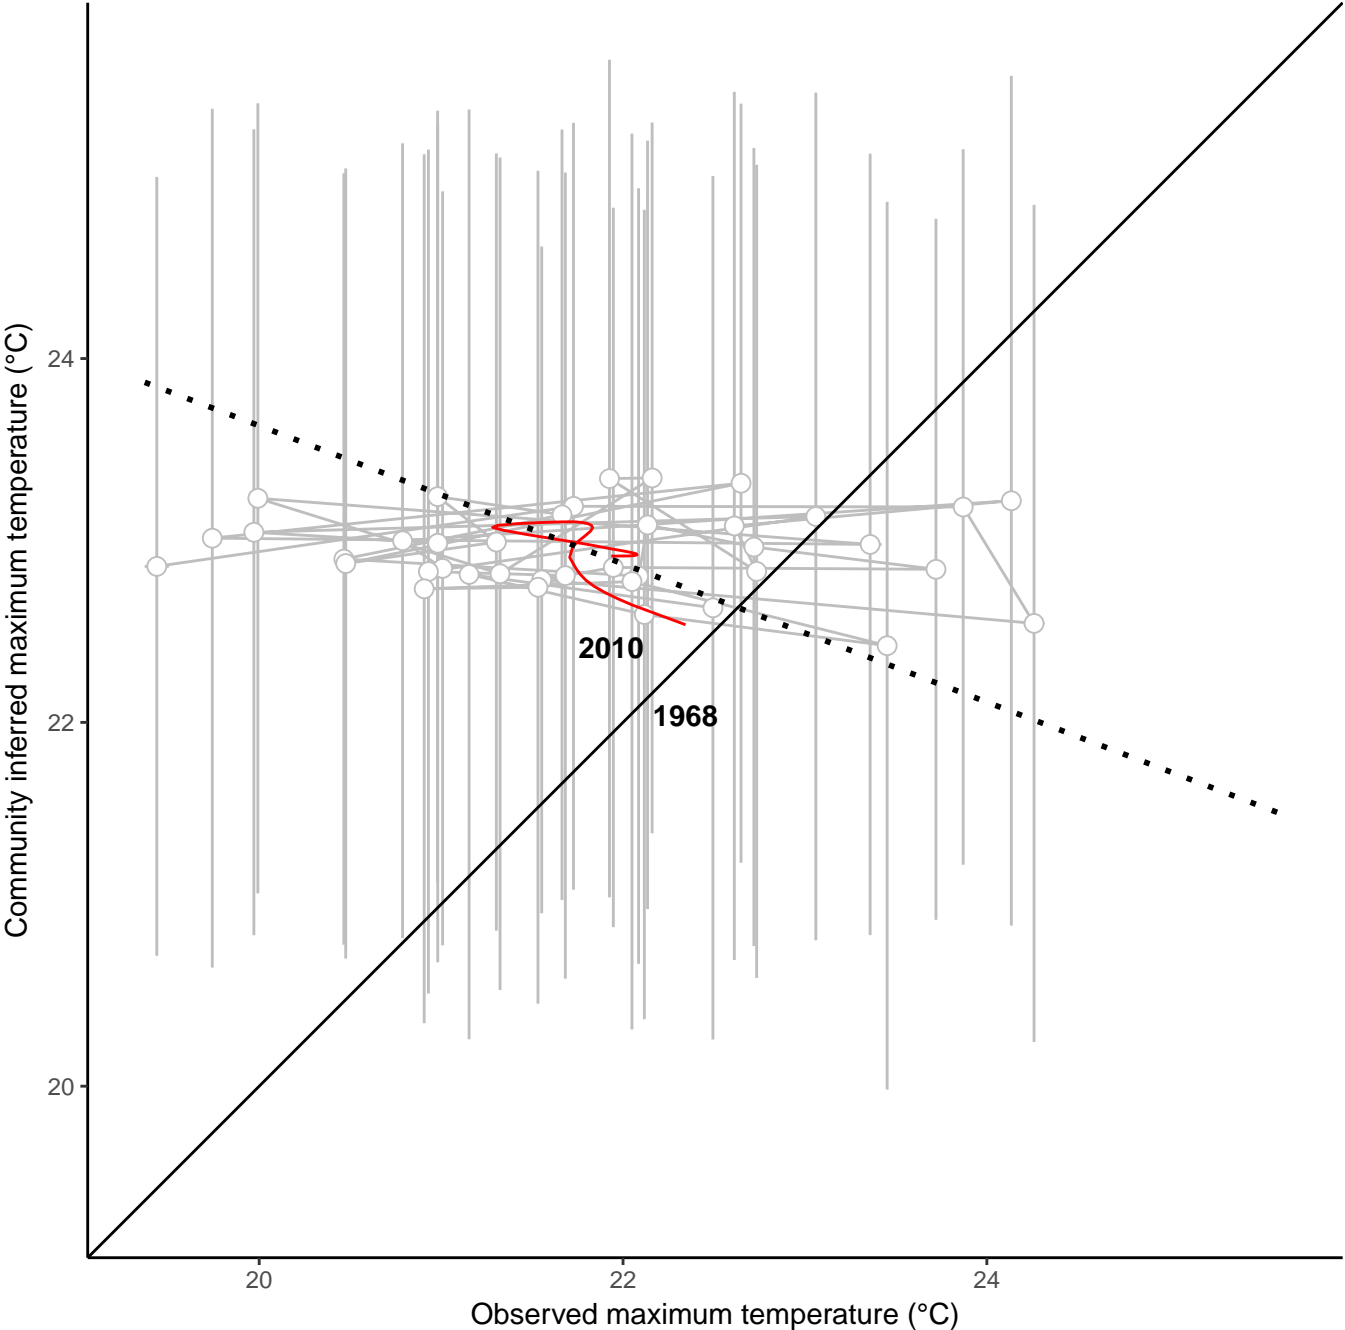

site : 840\_7\_24

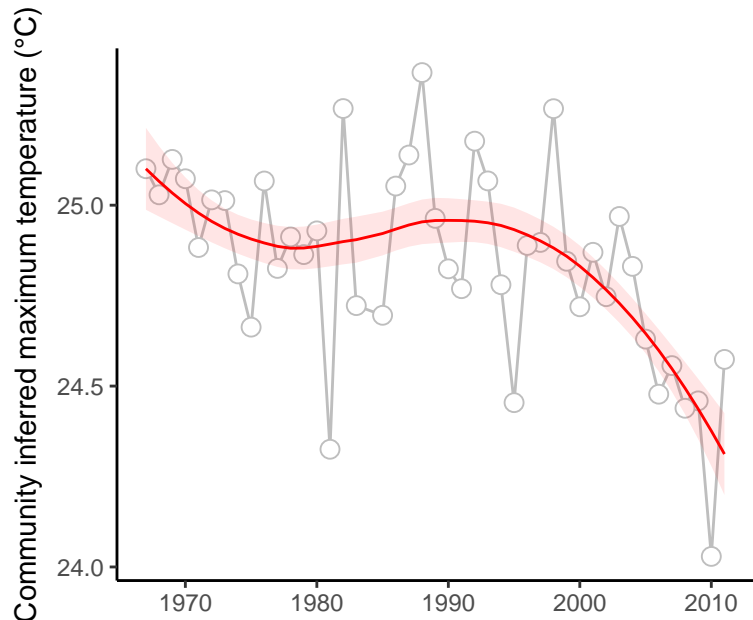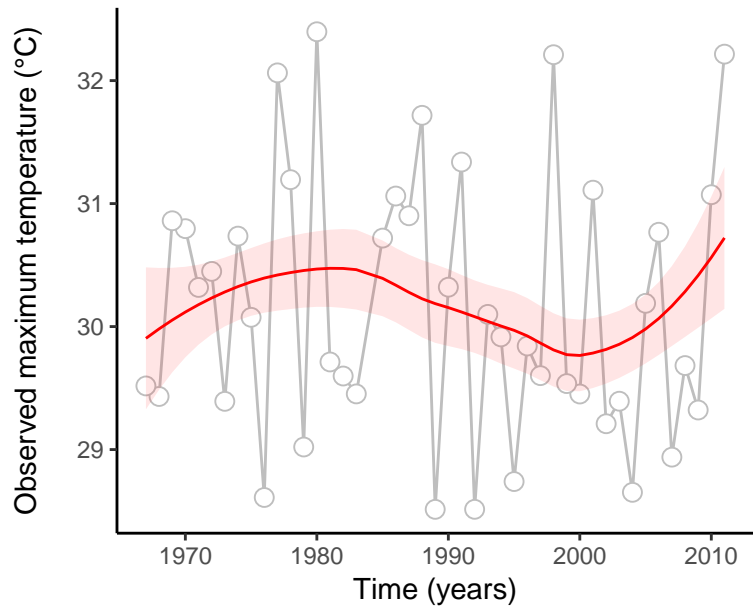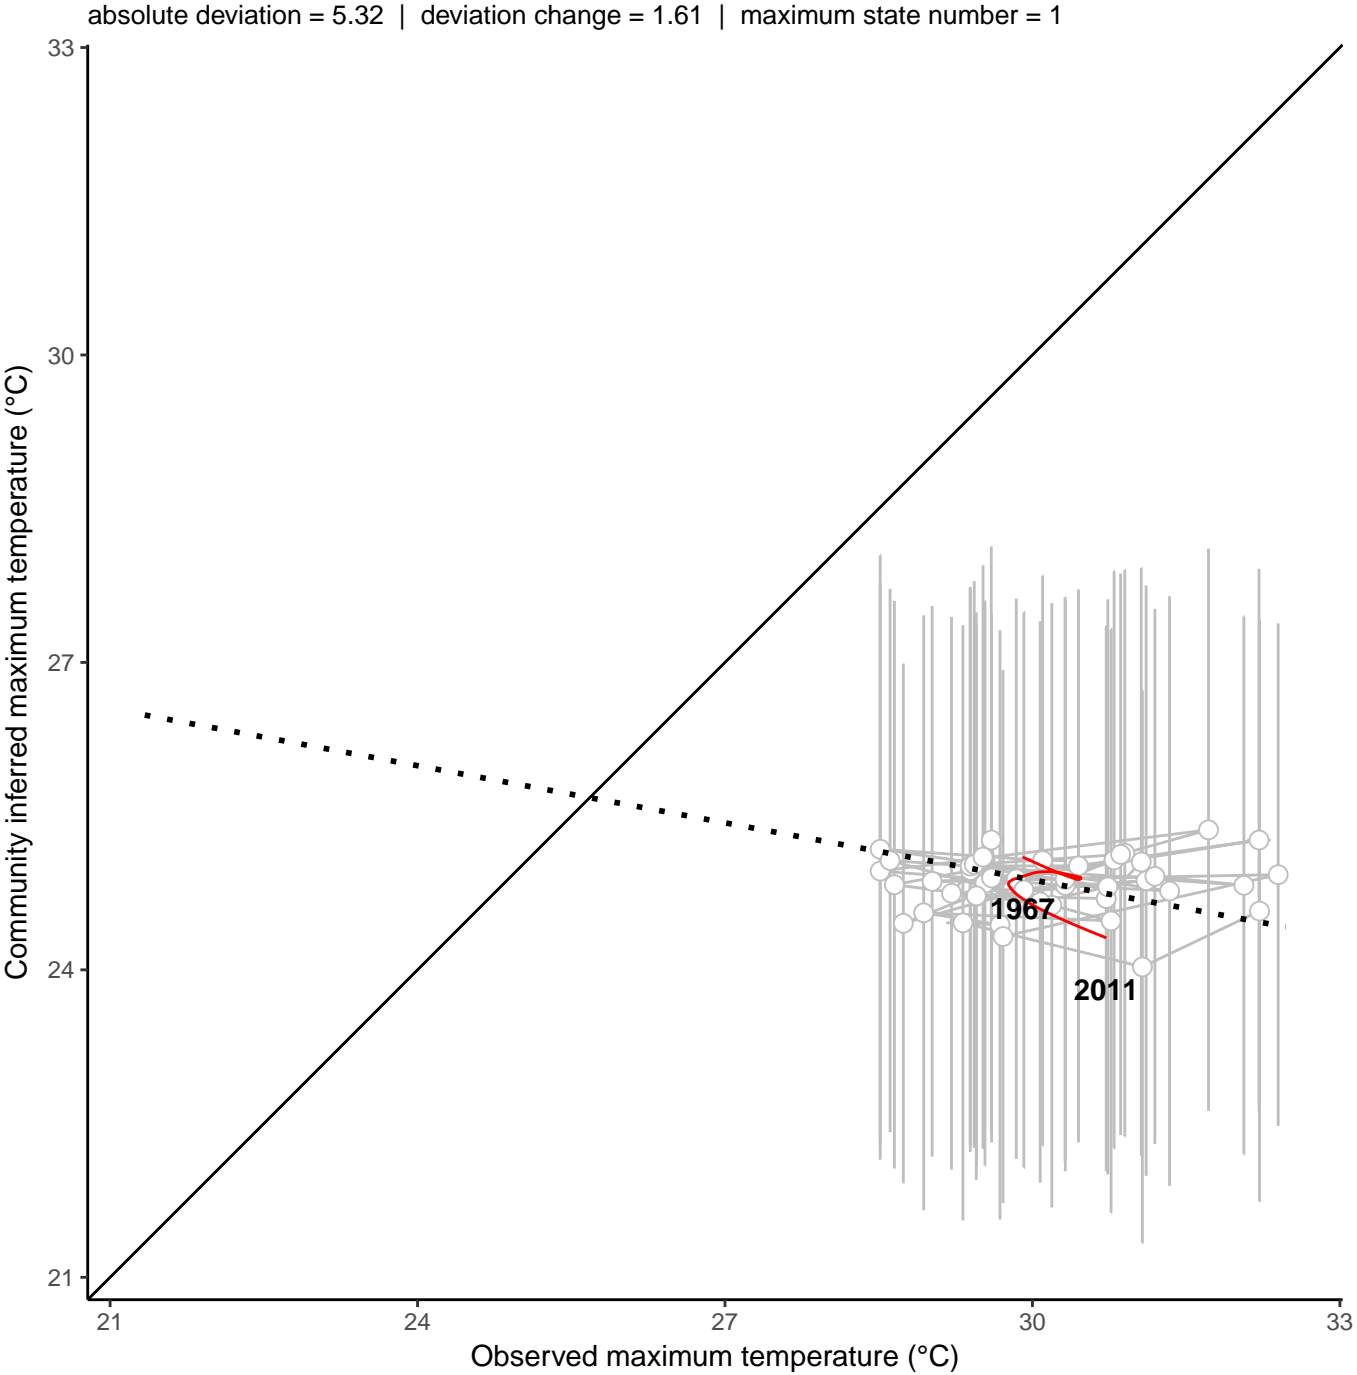

site : 840\_82\_9

absolute deviation = 3.44 | deviation change = -0.07 | maximum state number = 1

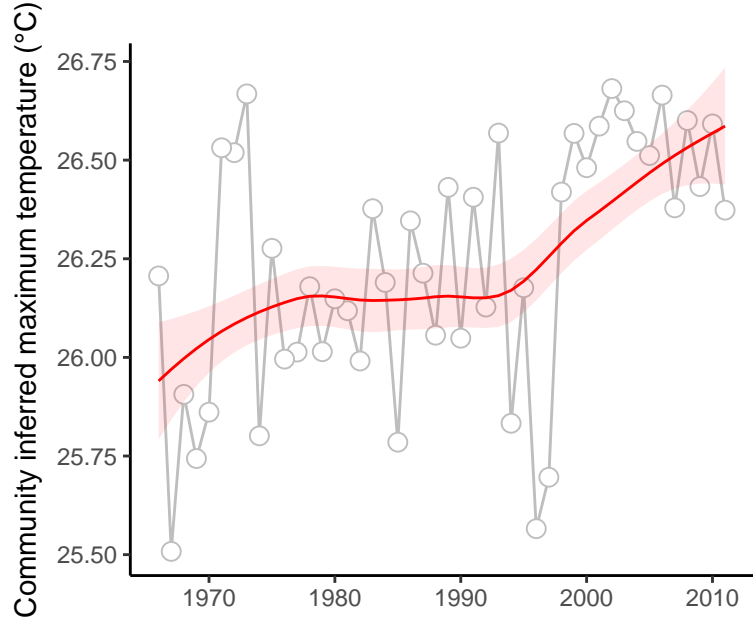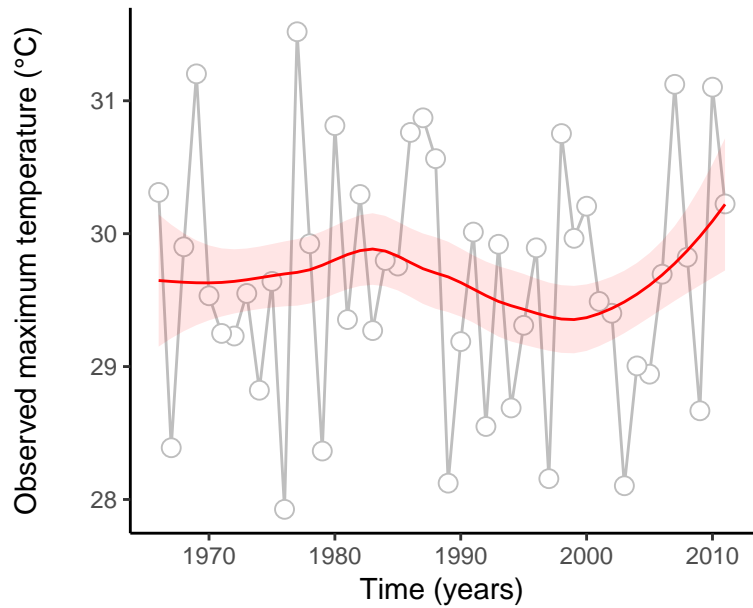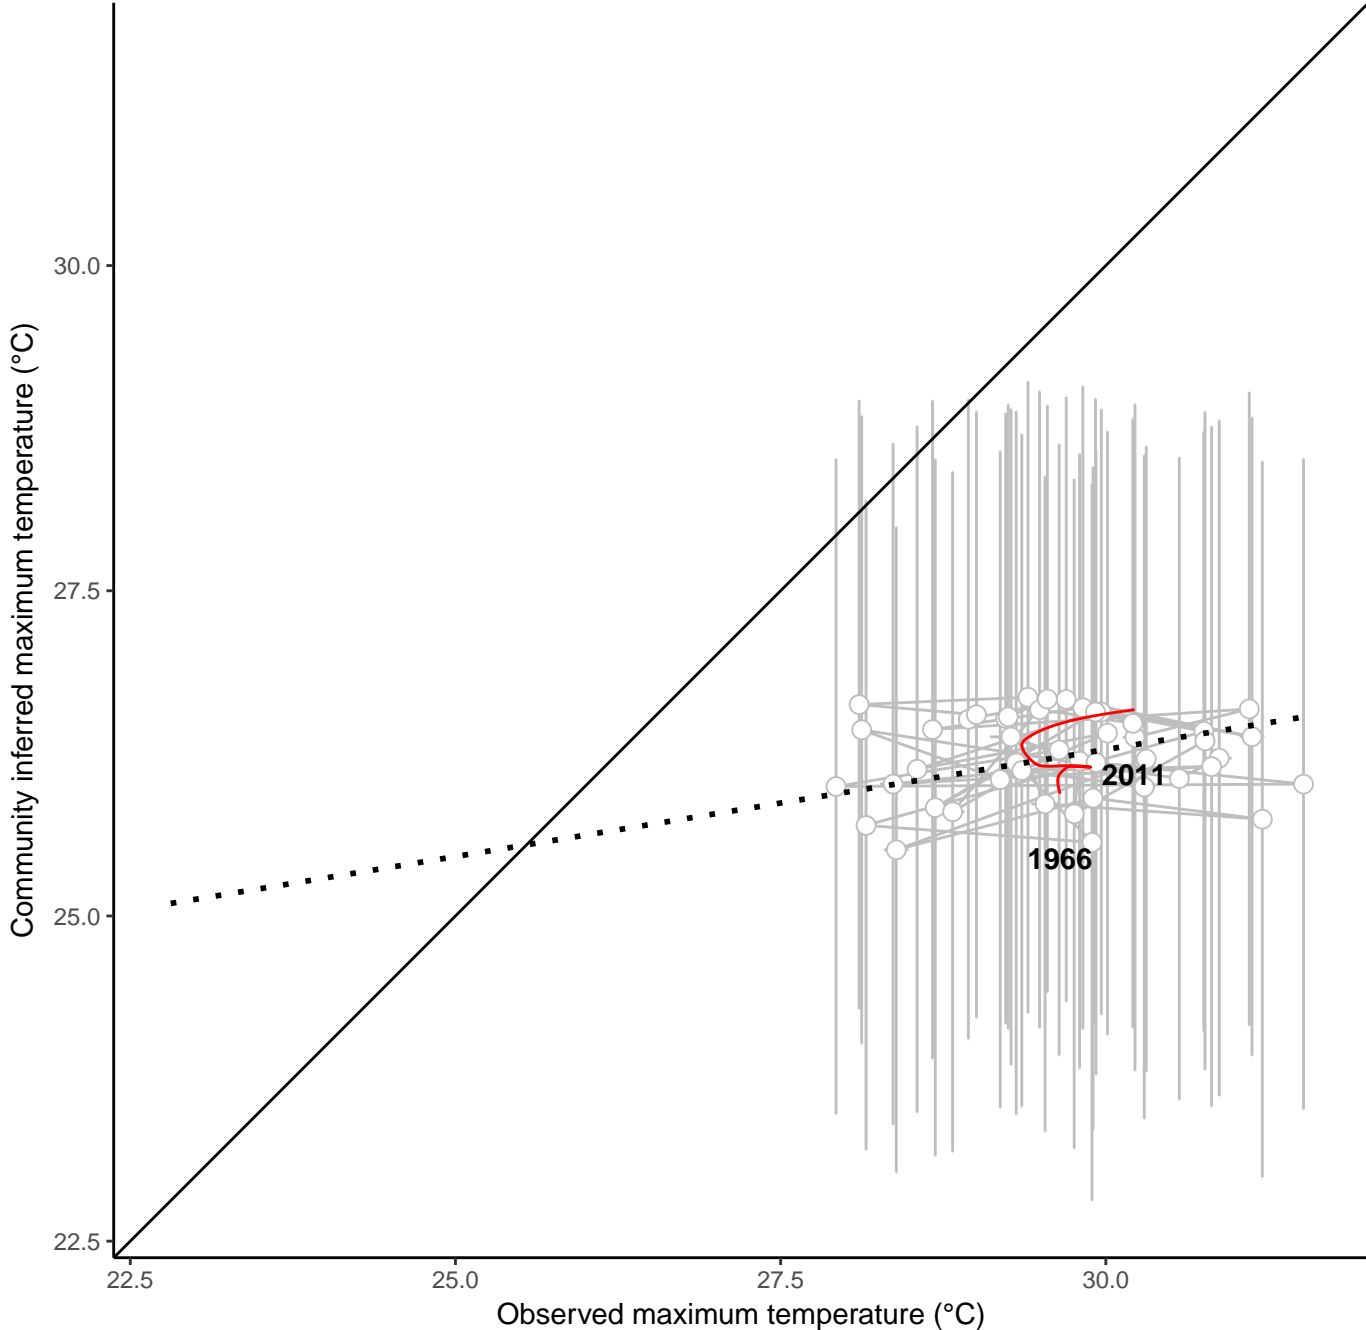

site : 840\_83\_30

absolute deviation = 5.89 | deviation change = 0.95 | maximum state number = 1

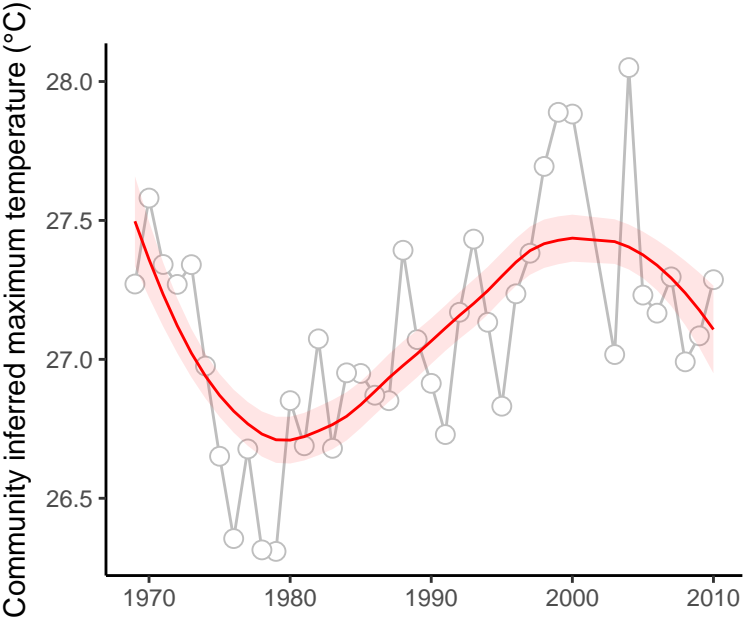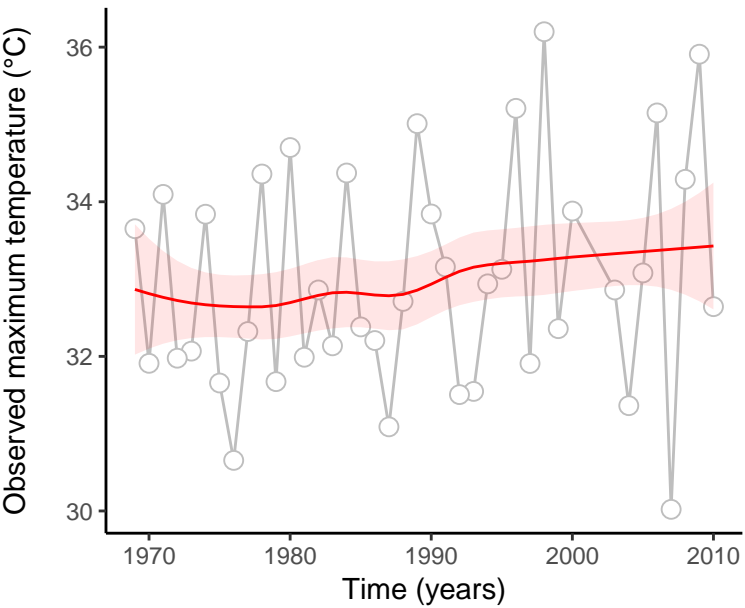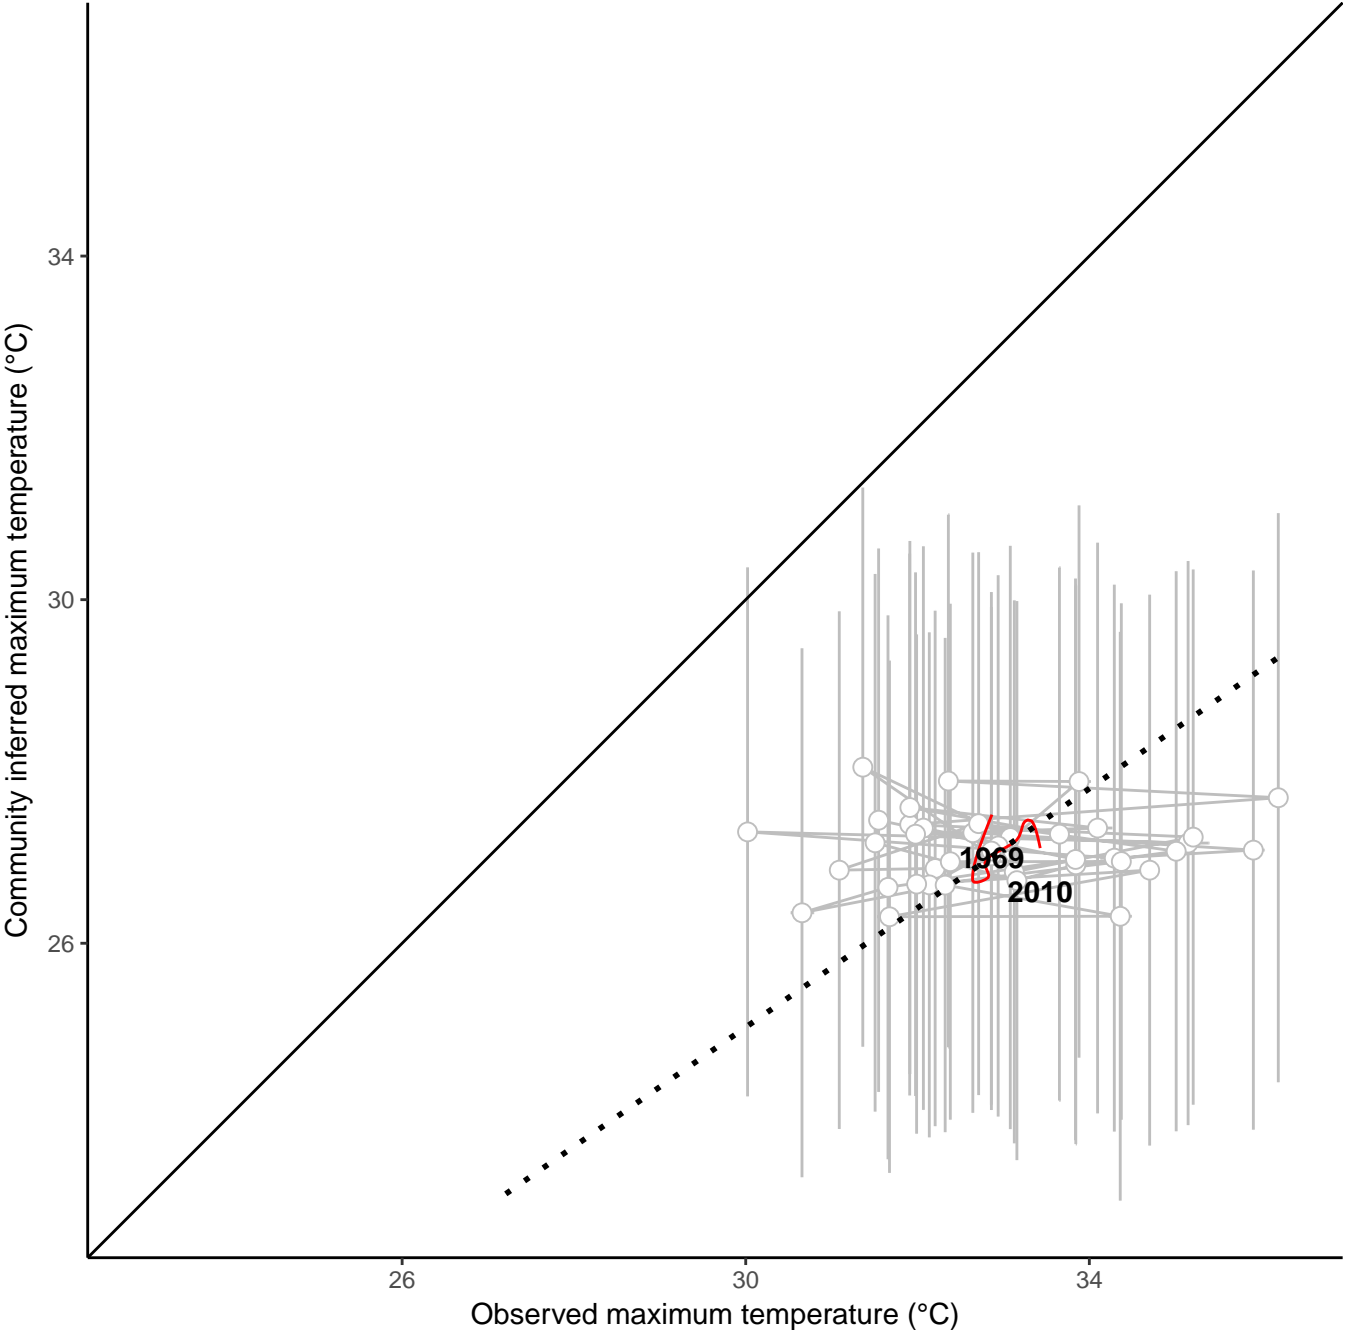

site : 840\_87\_9

absolute deviation = 0.42 | deviation change = 0.25 | maximum state number = 1

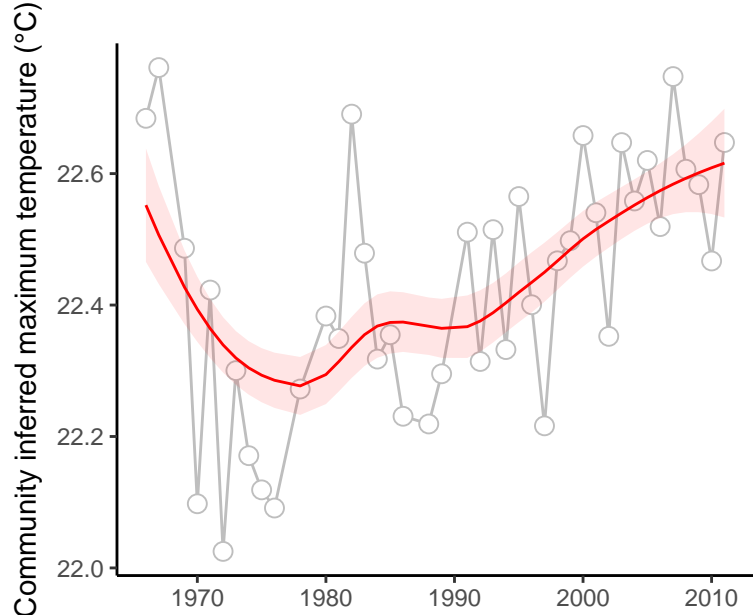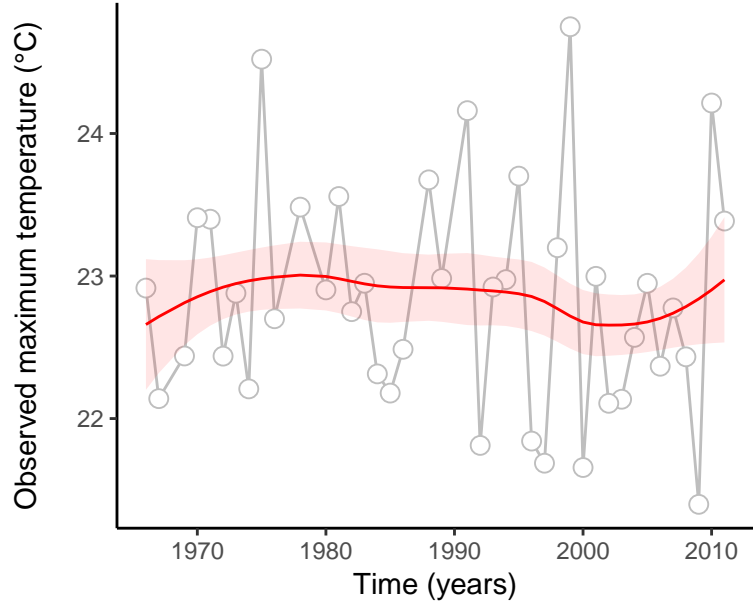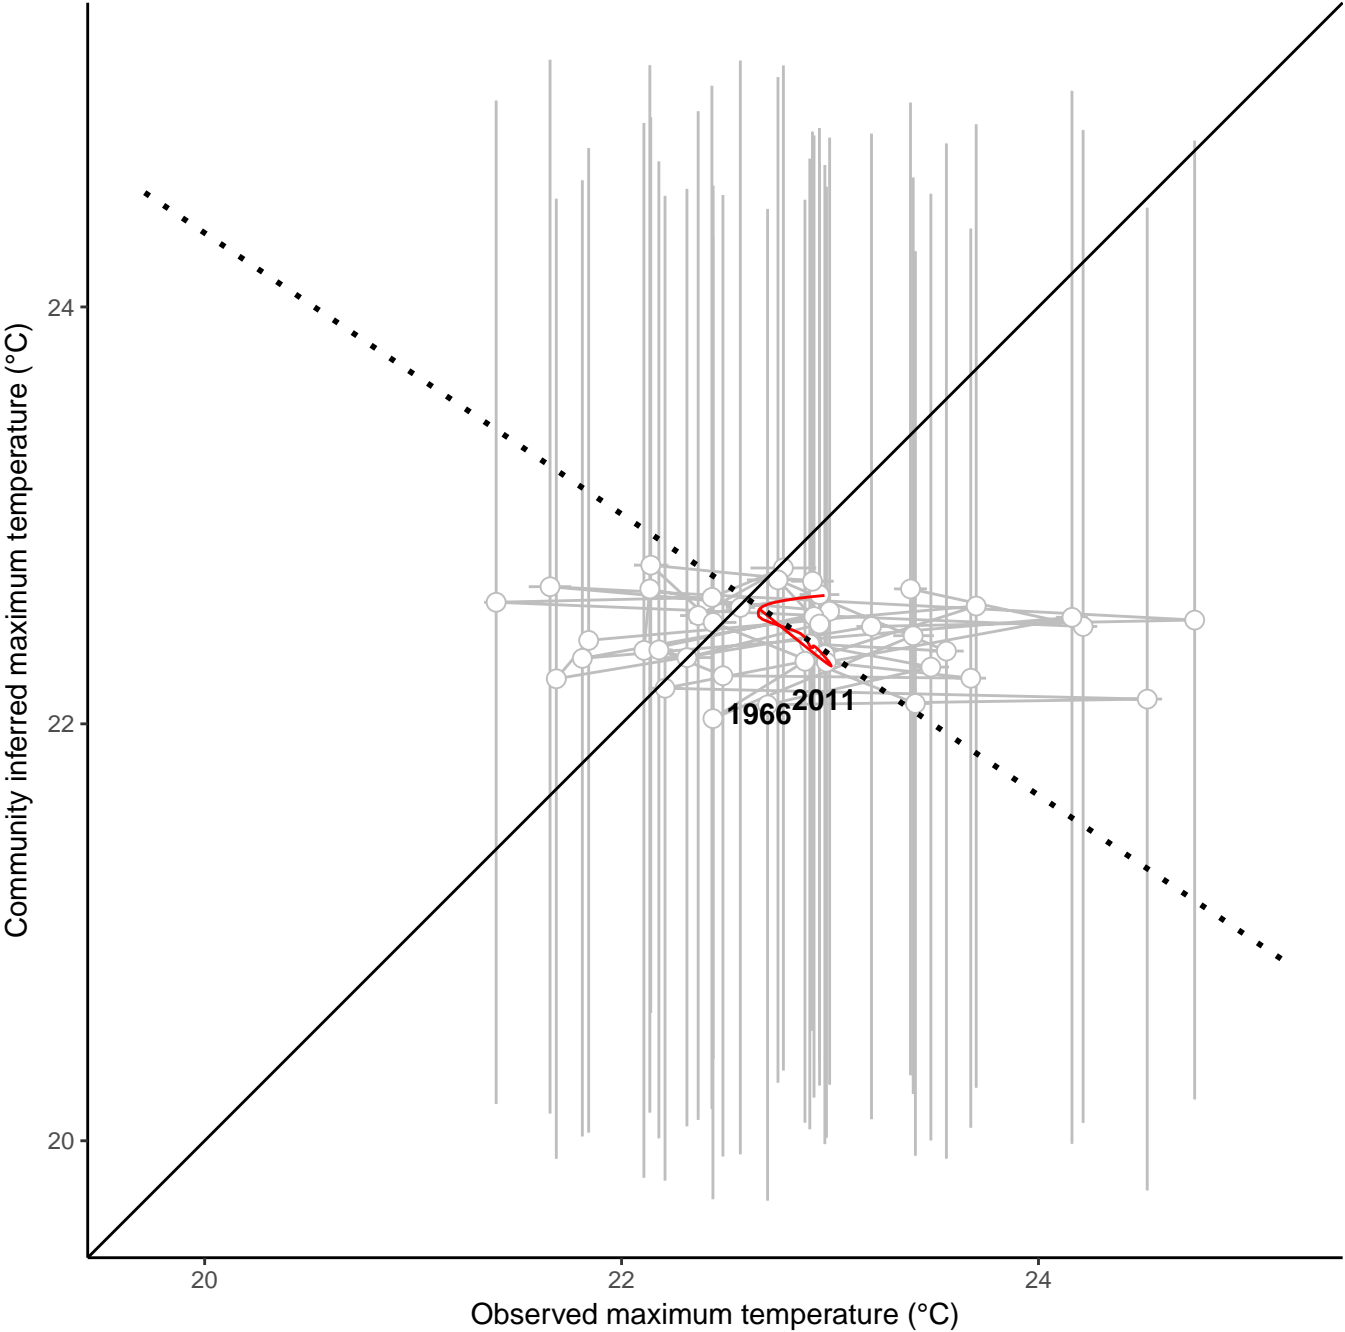

site : 840\_89\_7

absolute deviation = 2.11 | deviation change = 0.33 | maximum state number = 1

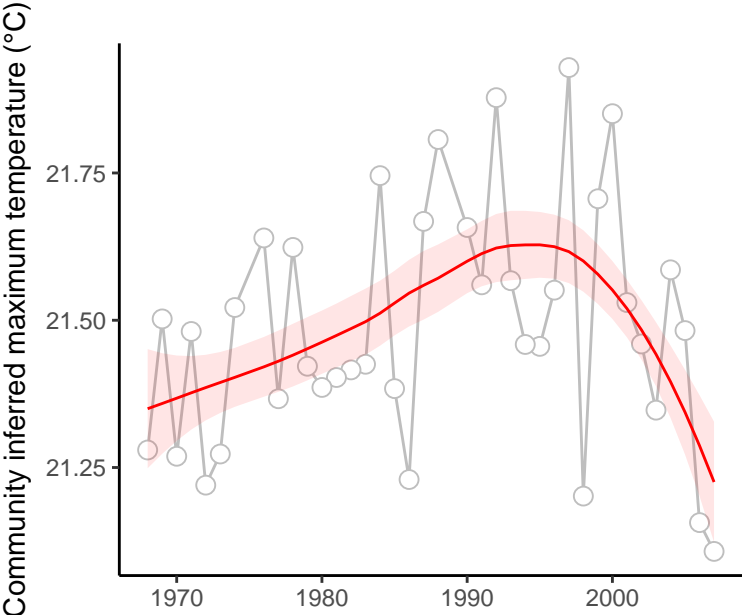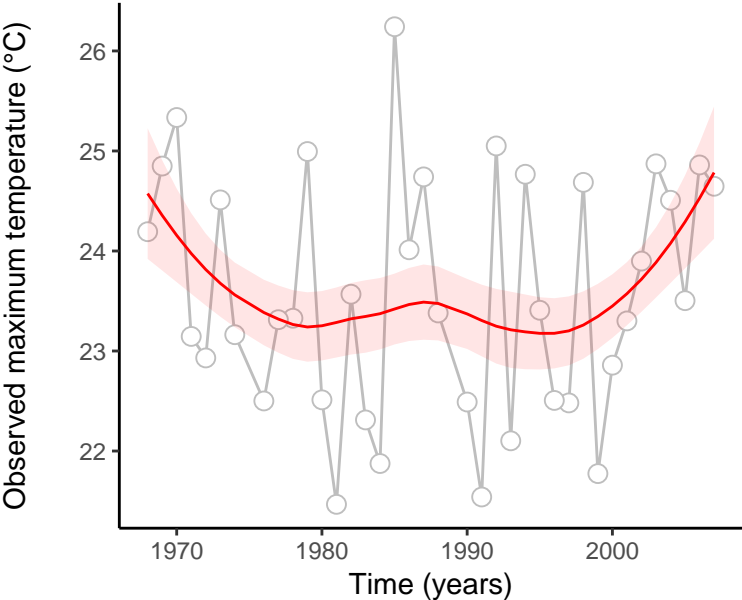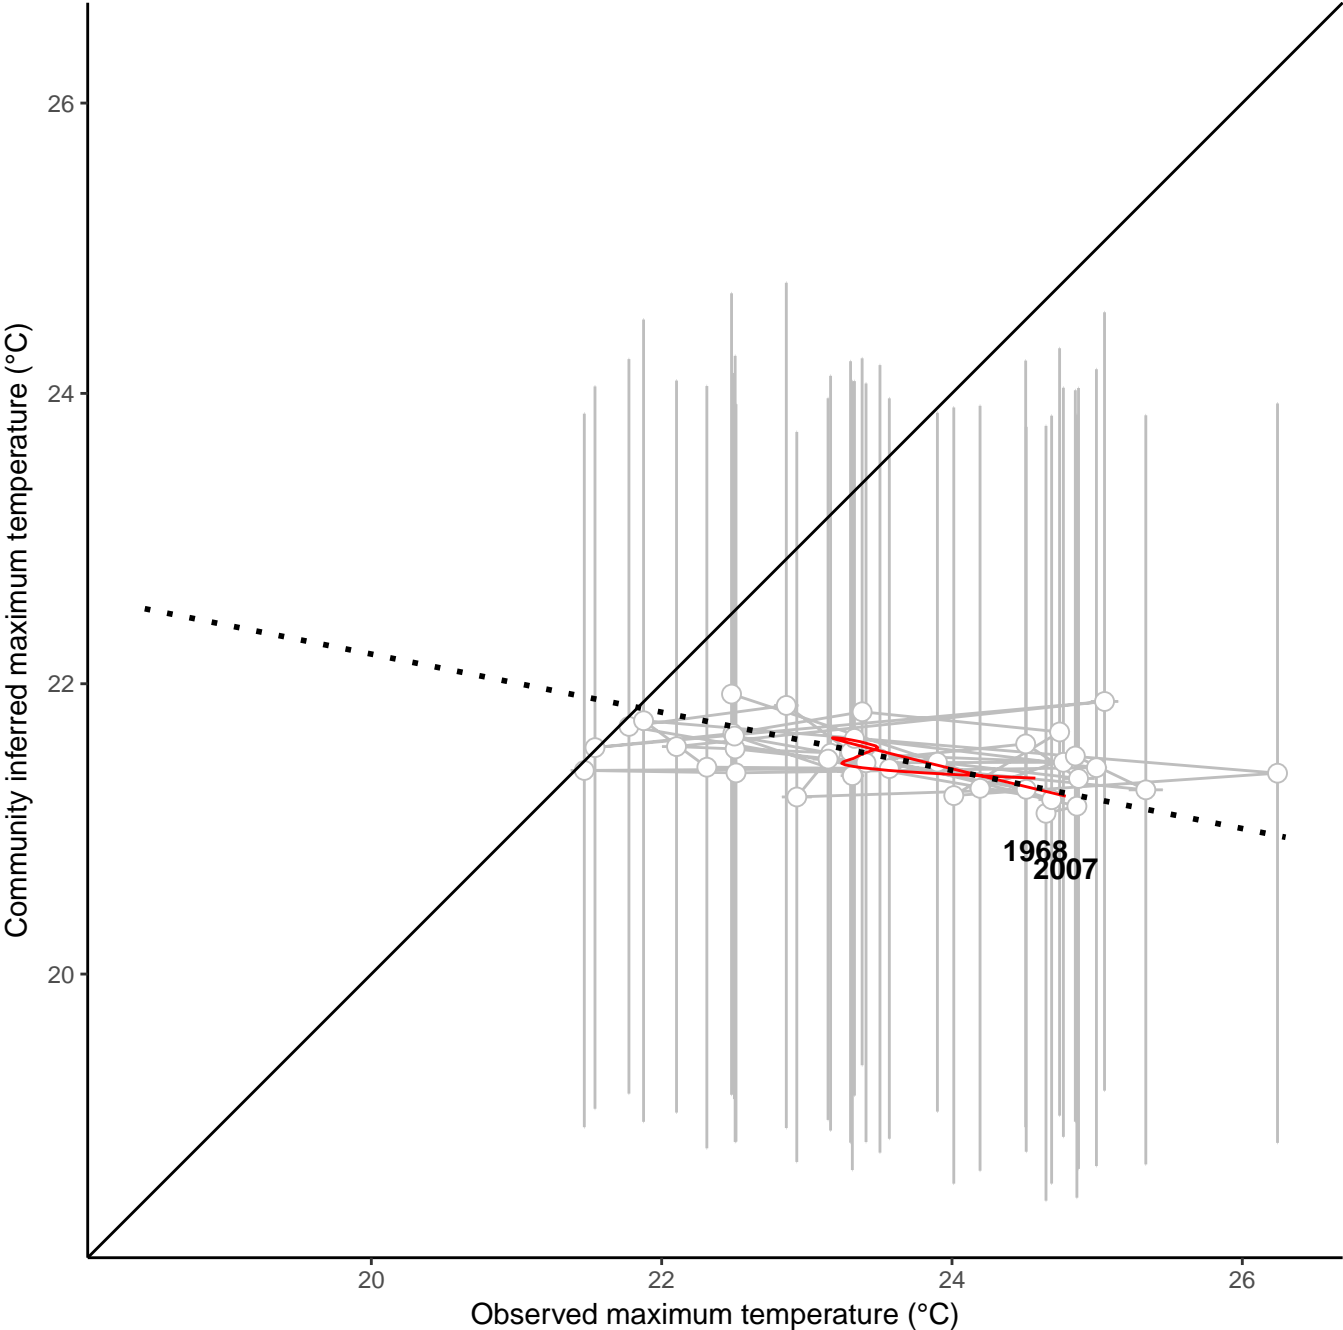

site : 840\_91\_23

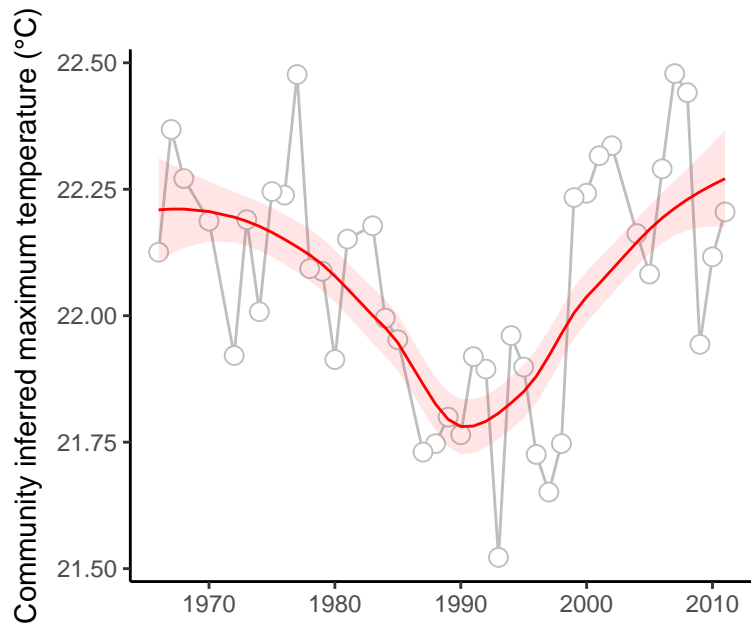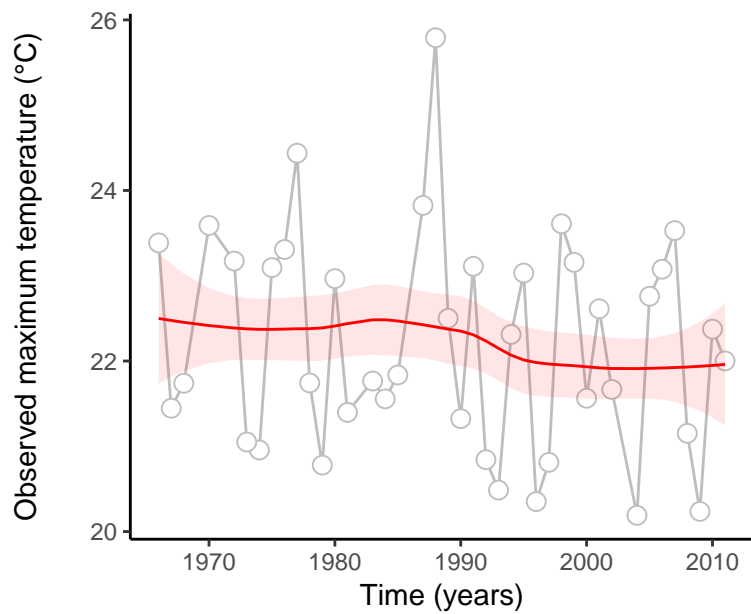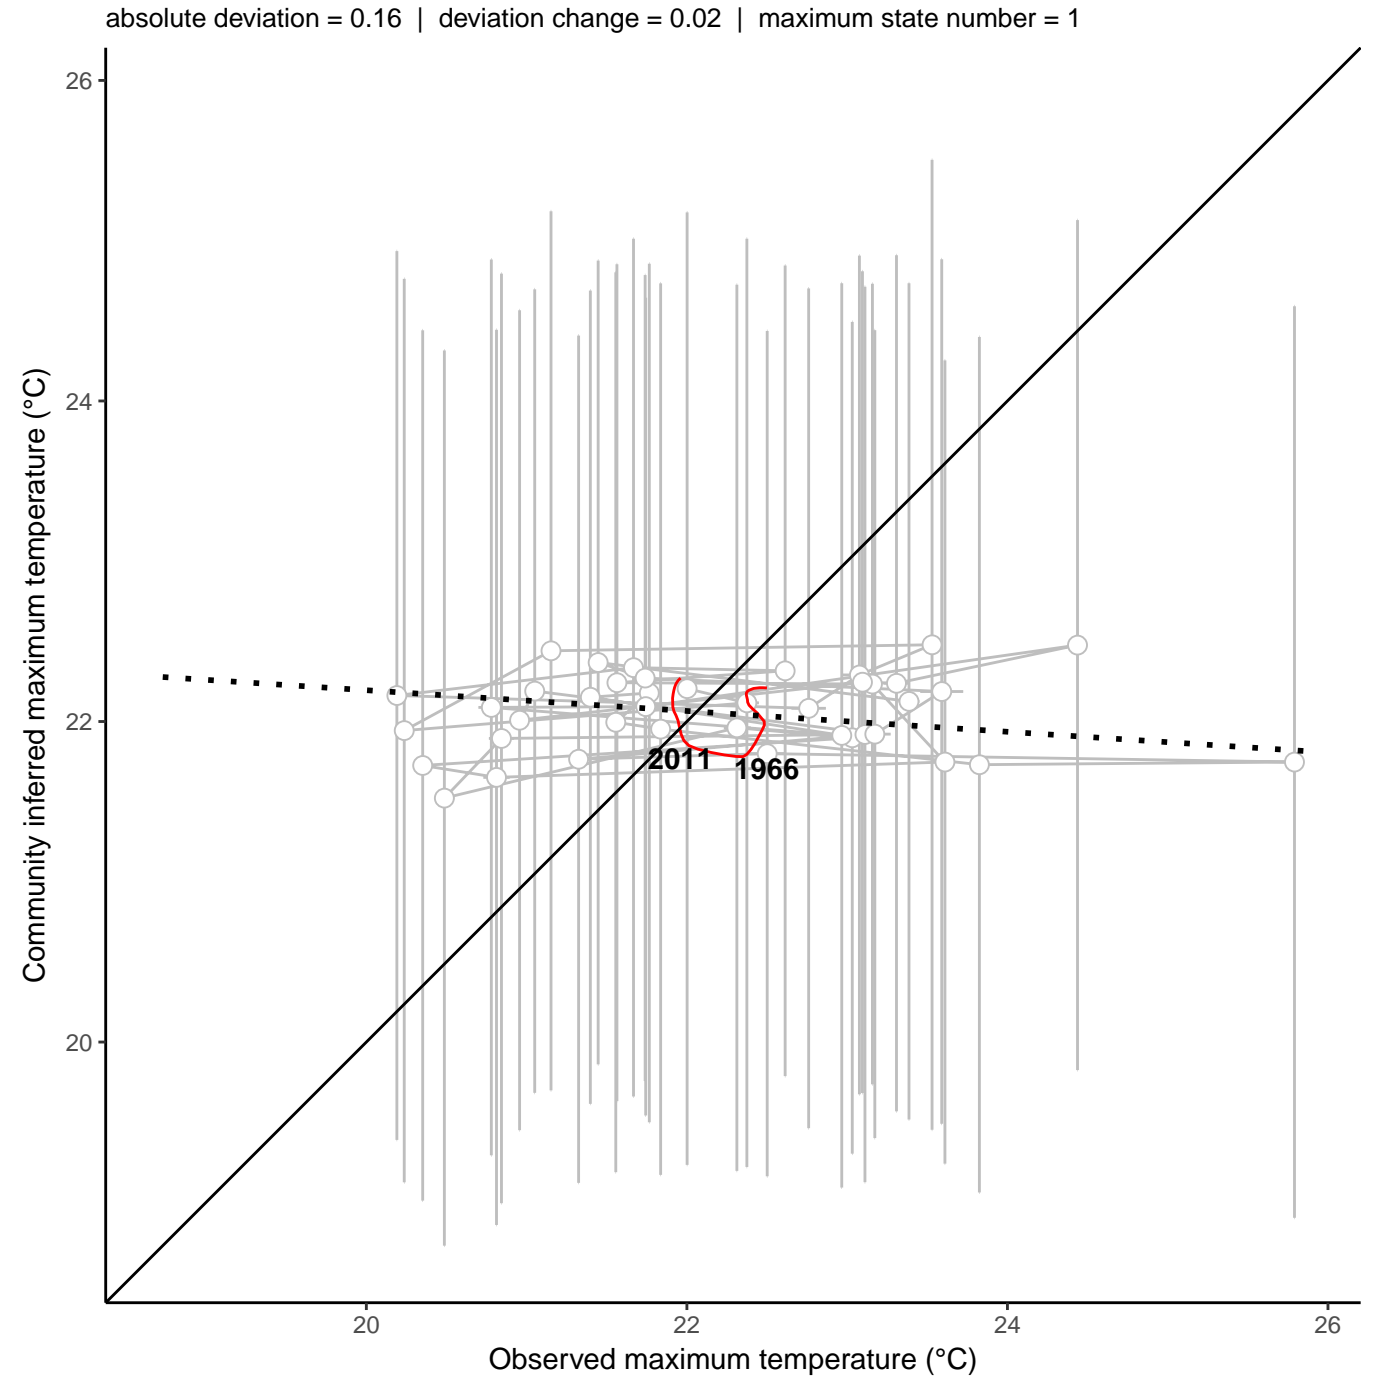



site : 840\_14\_81

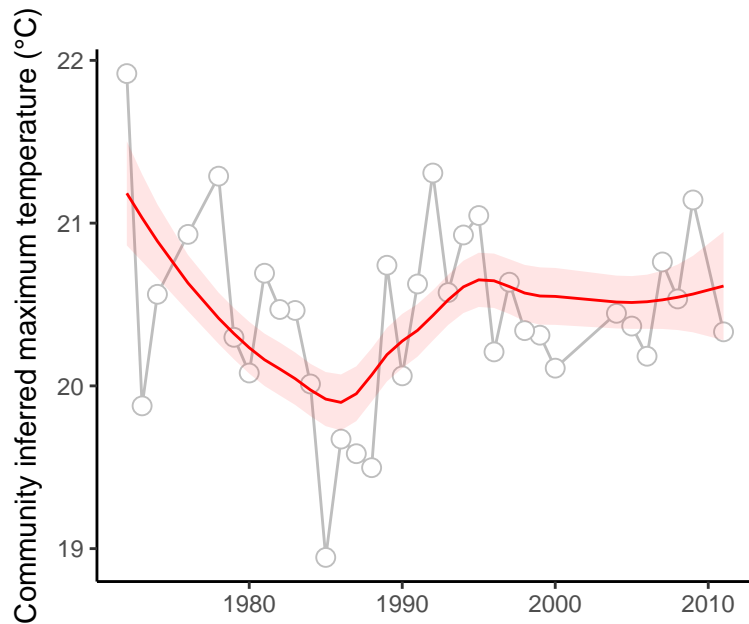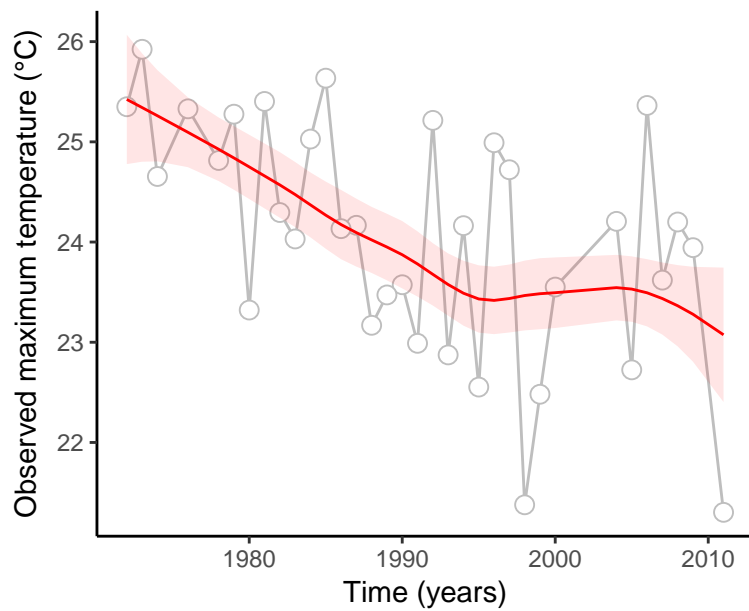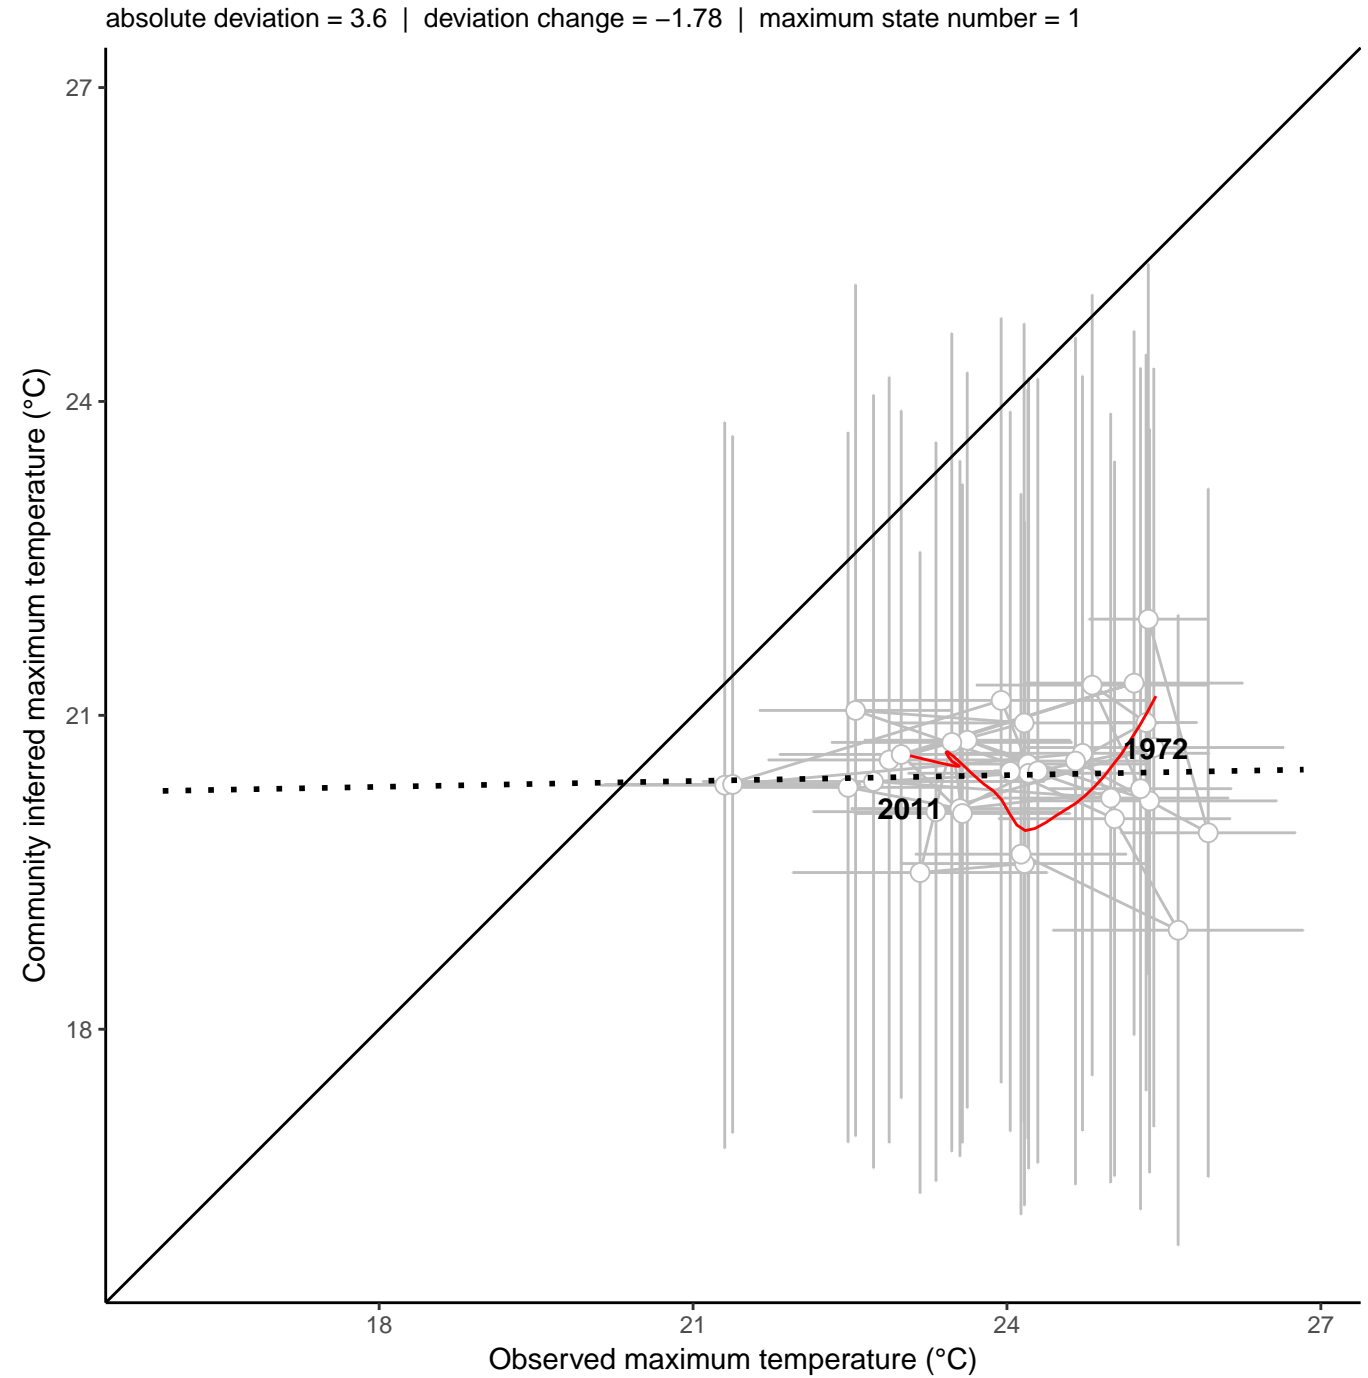

site : 840\_35\_42

absolute deviation = 4.25 | deviation change = 1.87 | maximum state number = 2

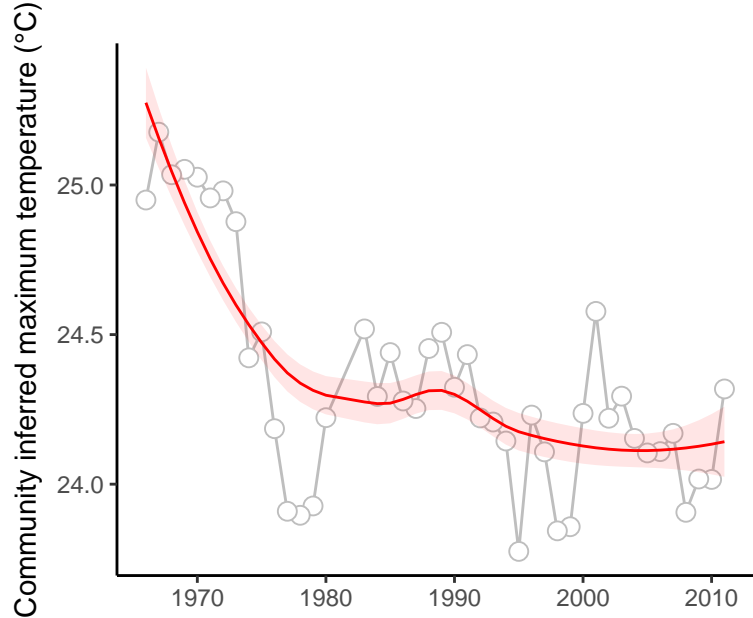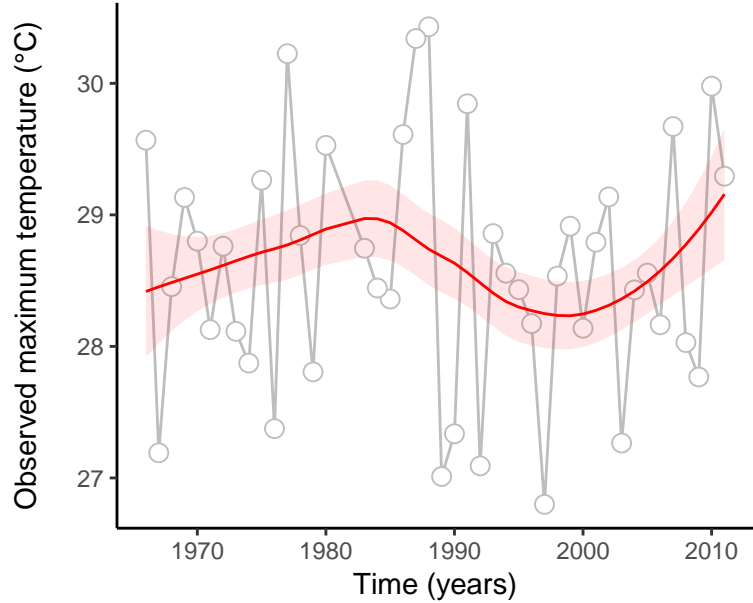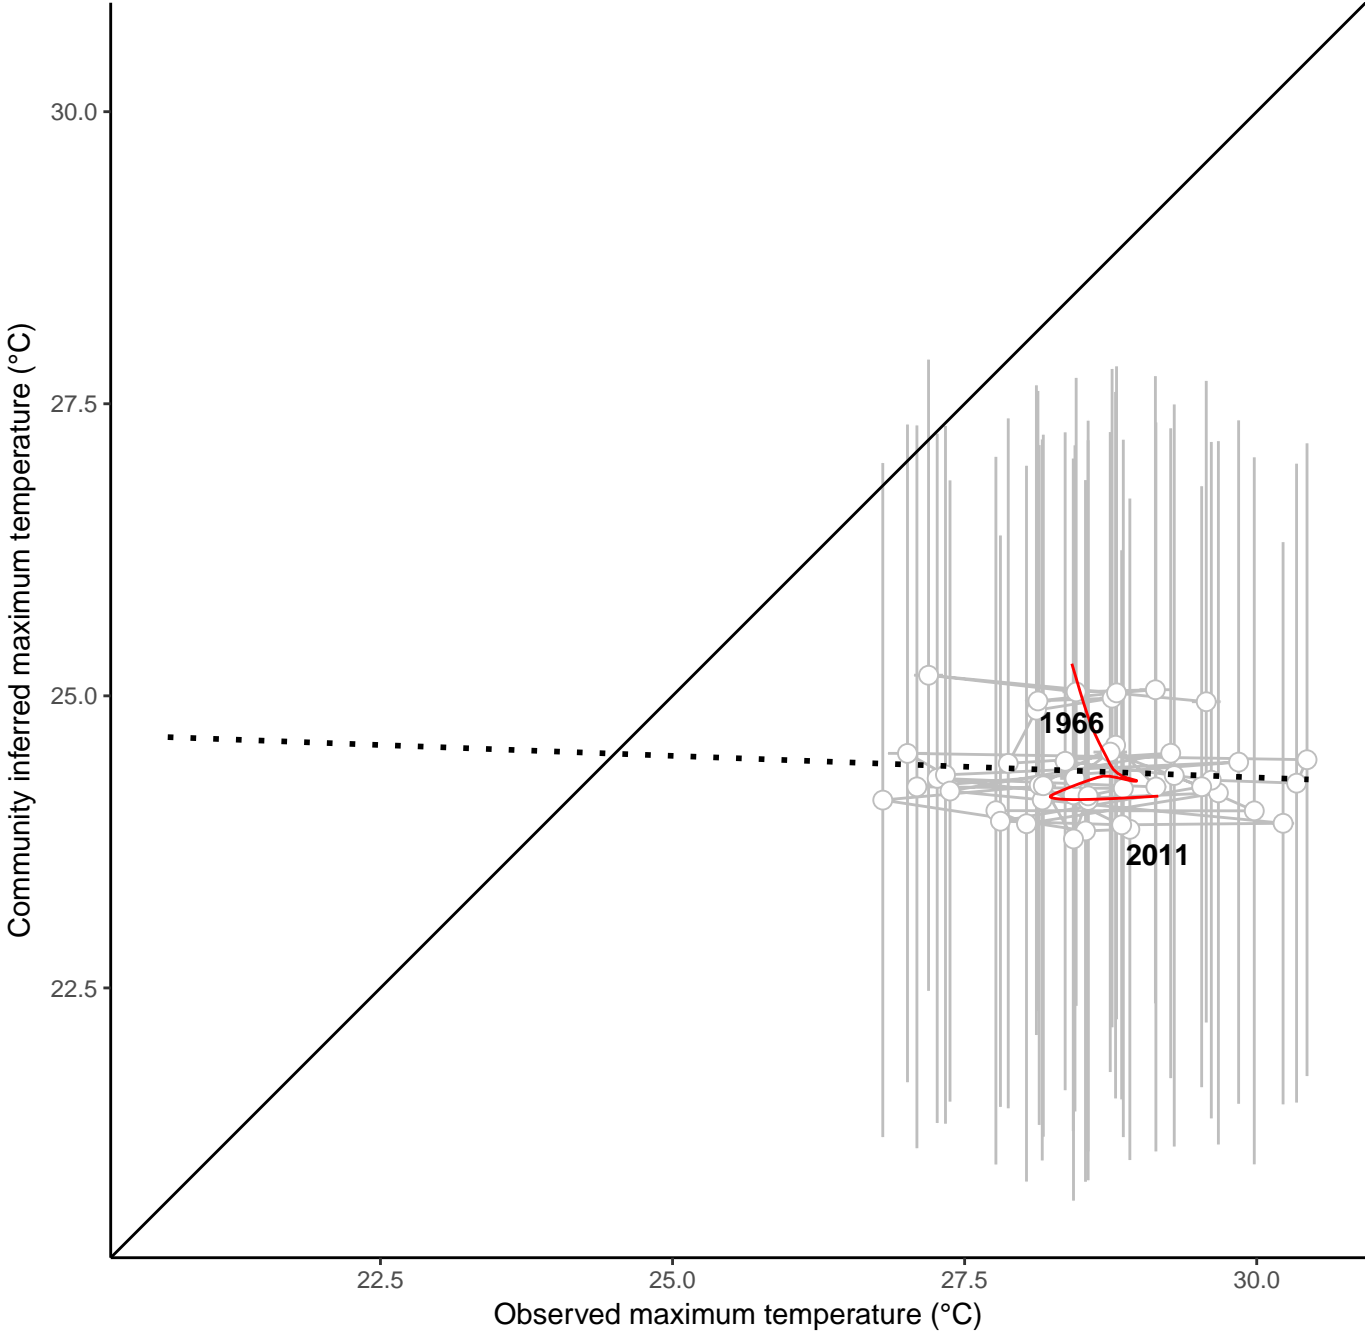

site : 840\_46\_20

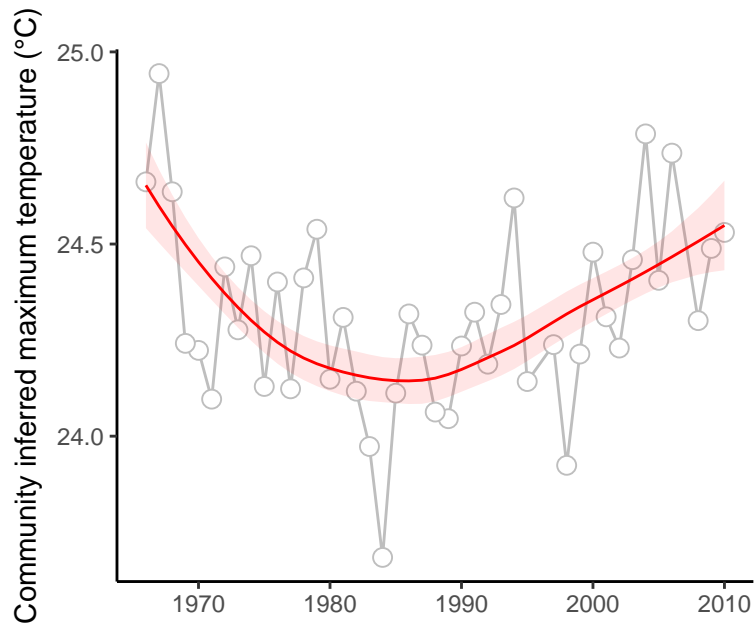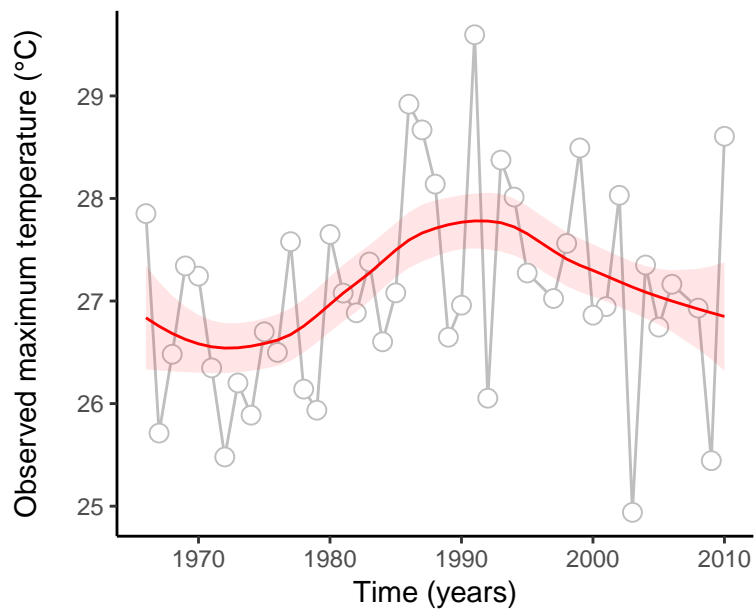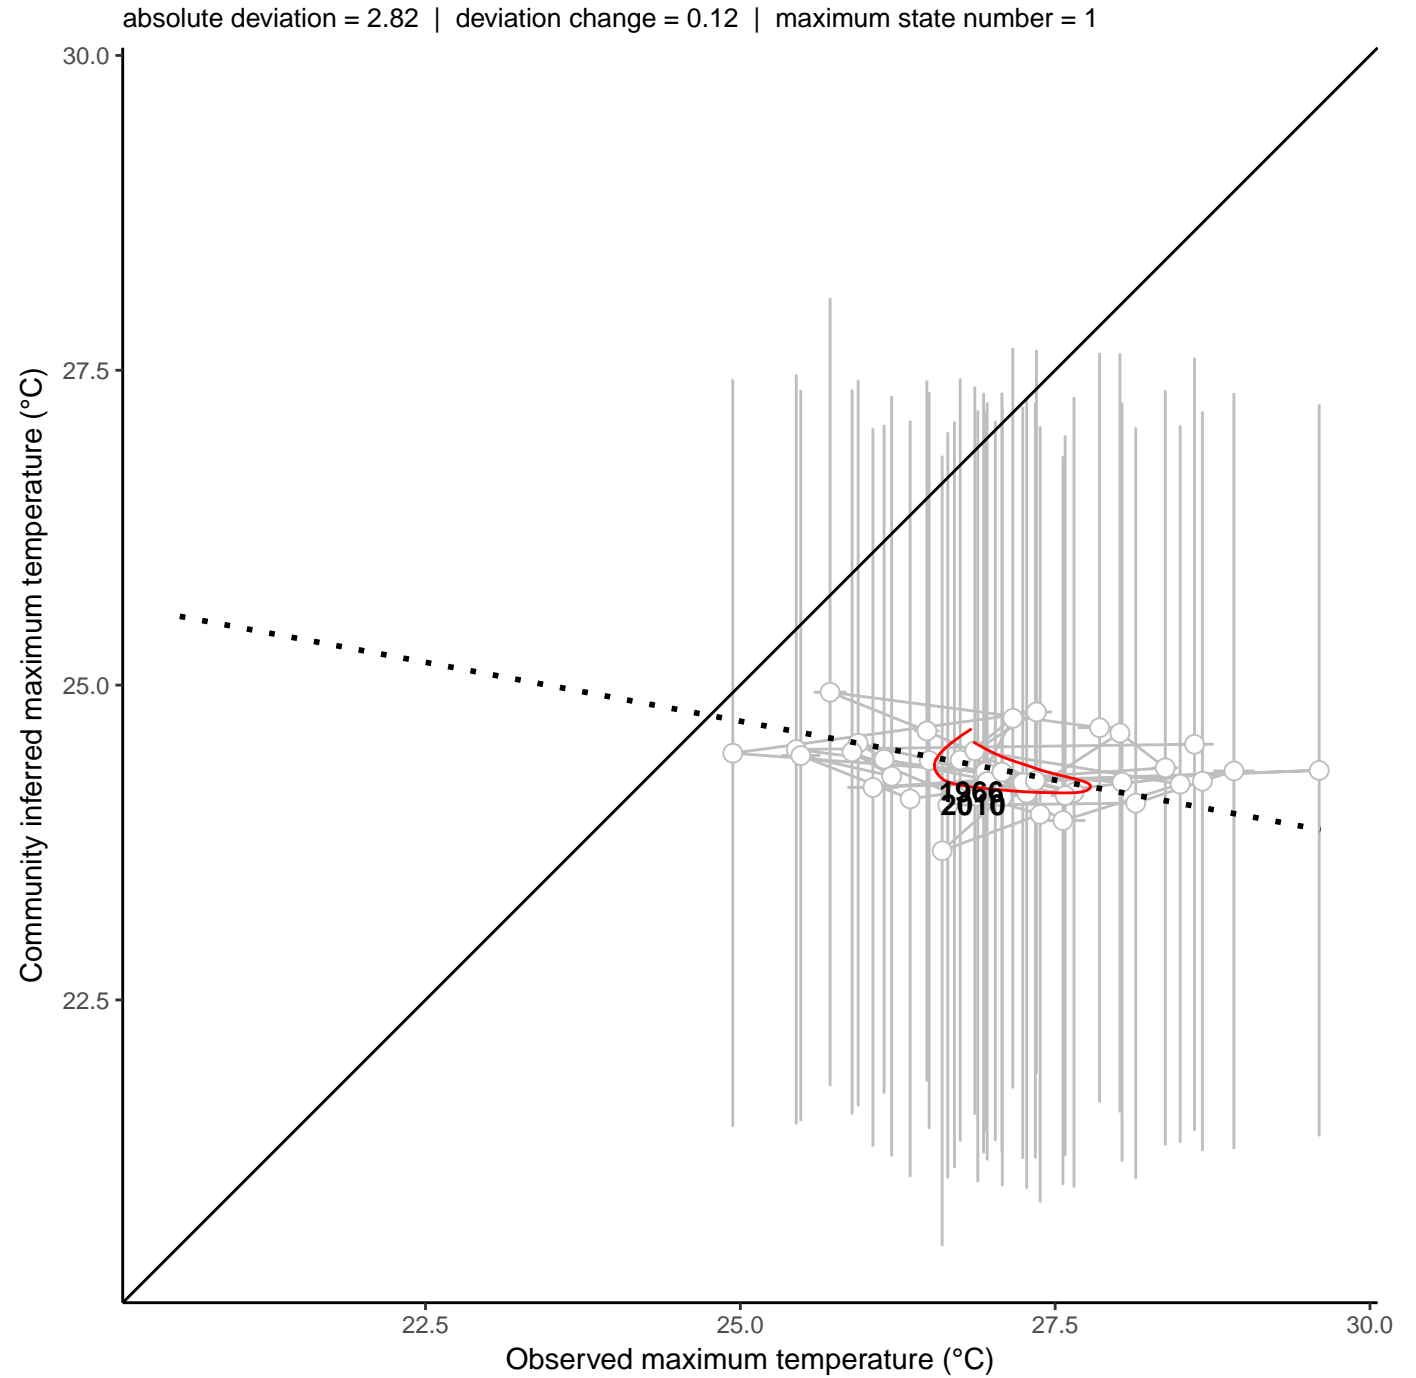

site : 840\_61\_111

absolute deviation = 0.03 | deviation change = 0.43 | maximum state number = 1

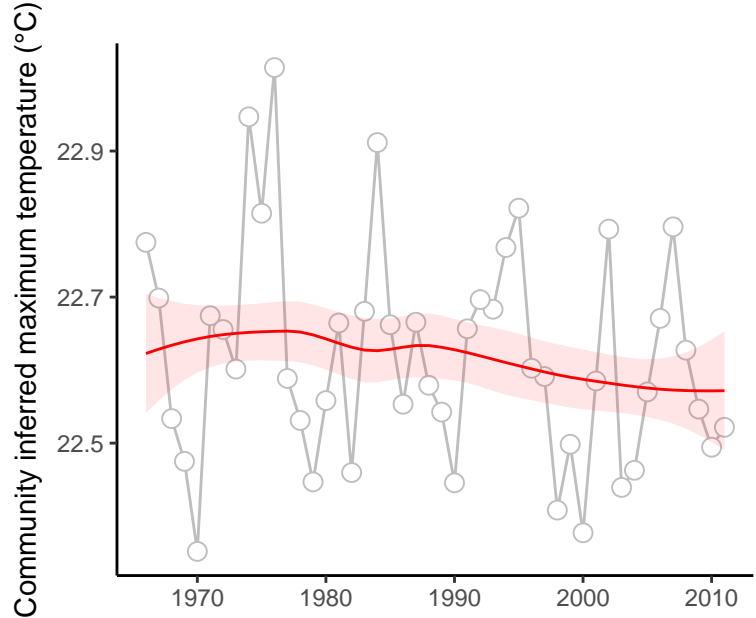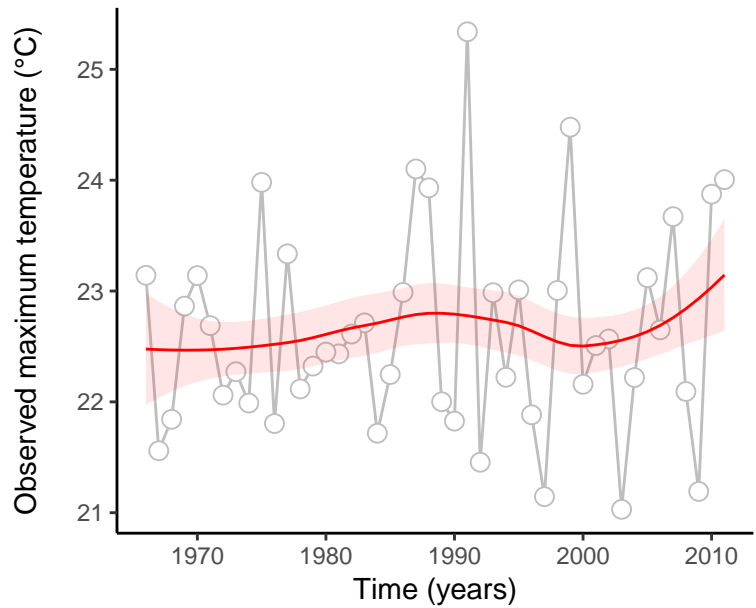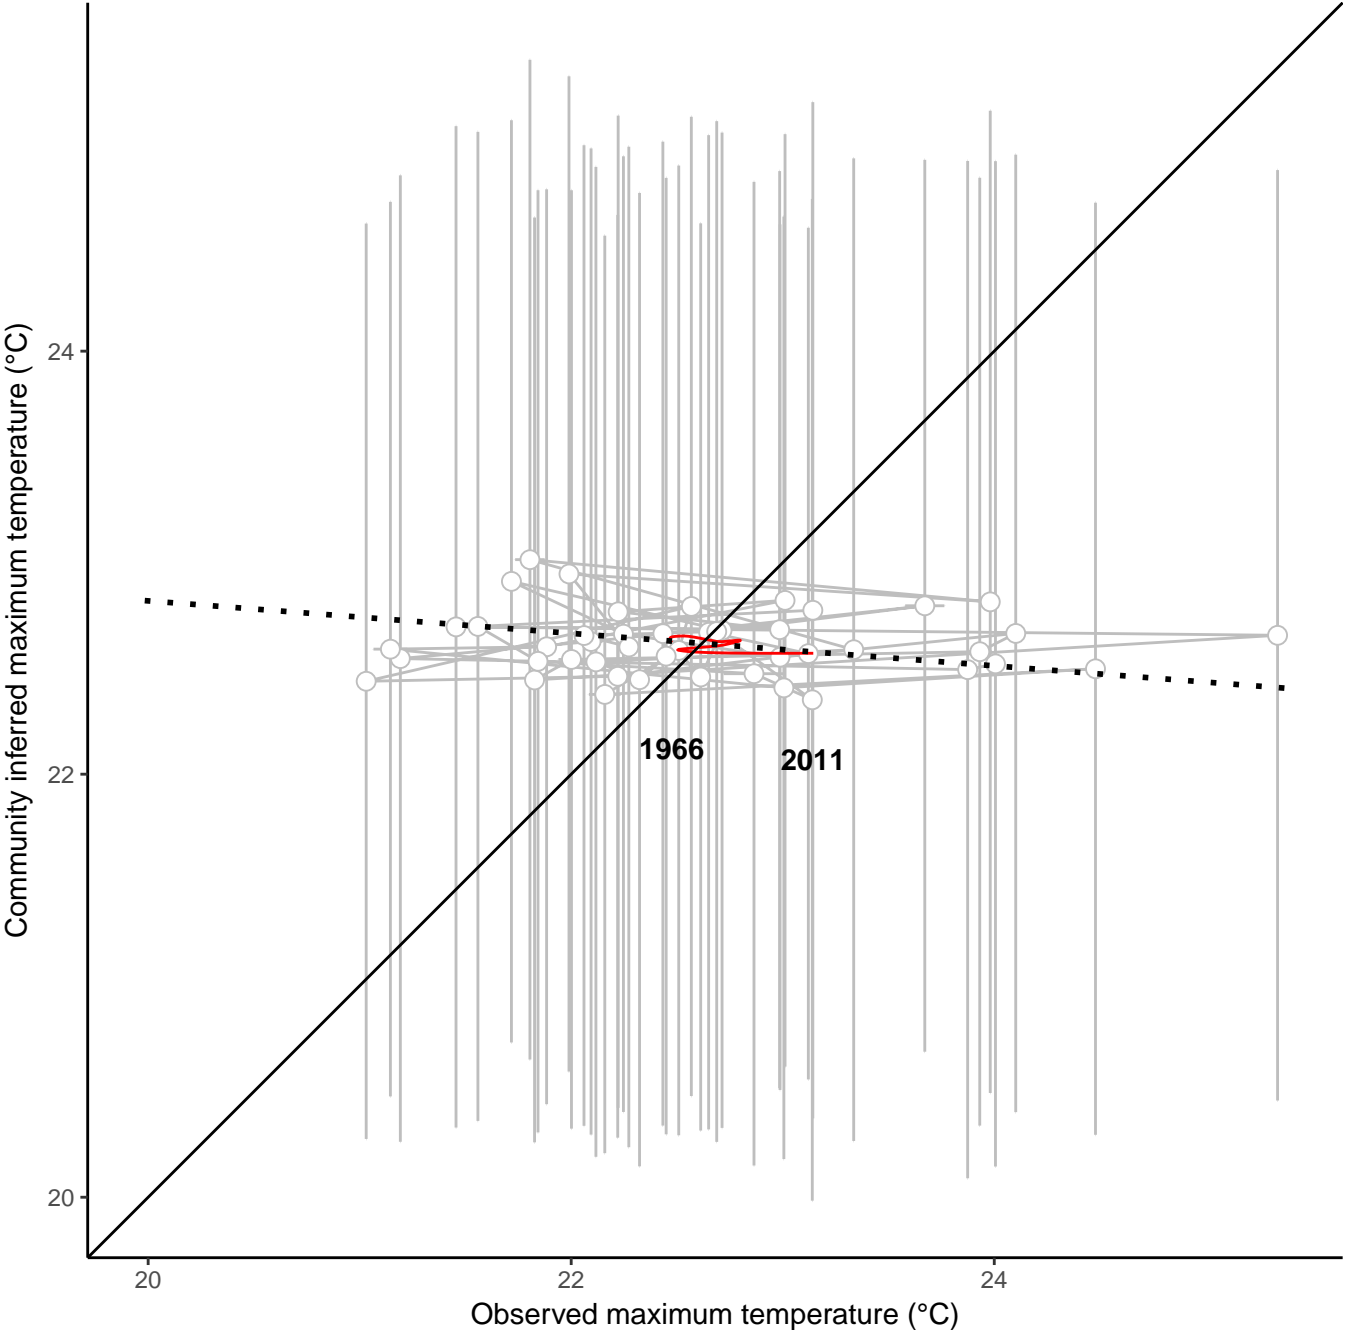

site : 840\_63\_20

absolute deviation = 1.35 | deviation change = 0.04 | maximum state number = 1

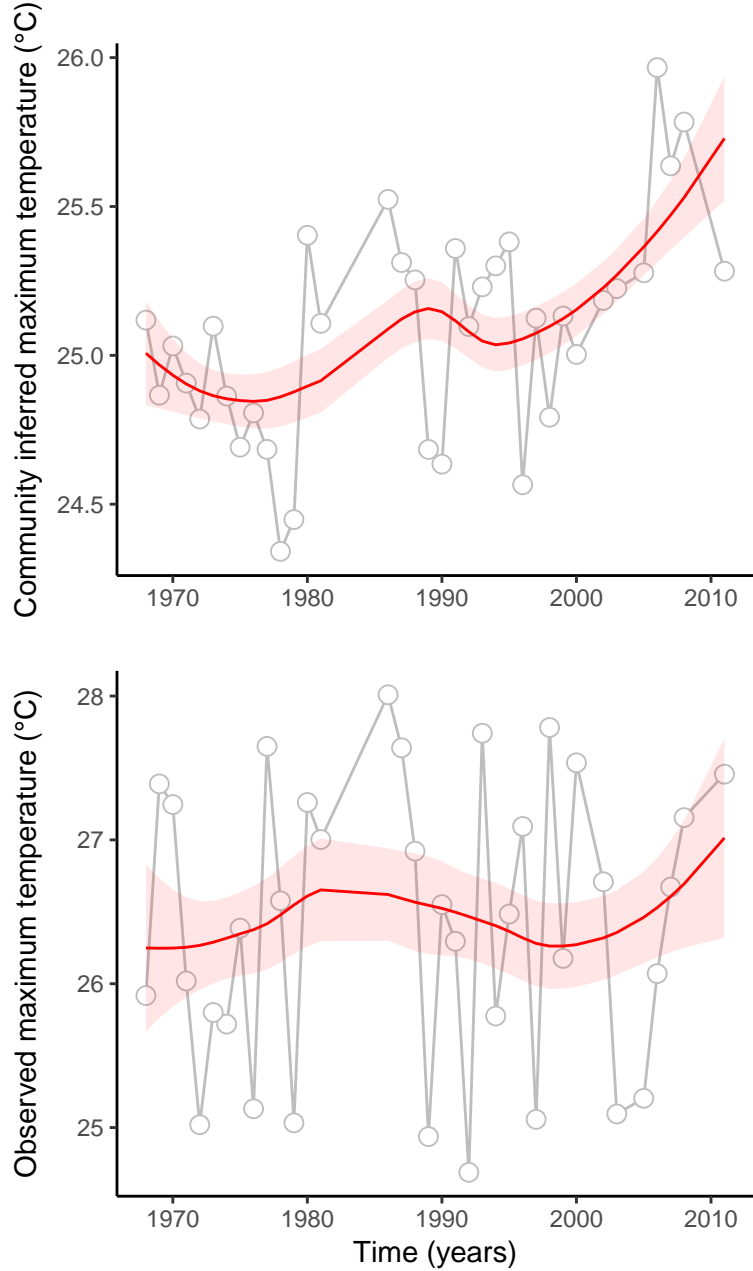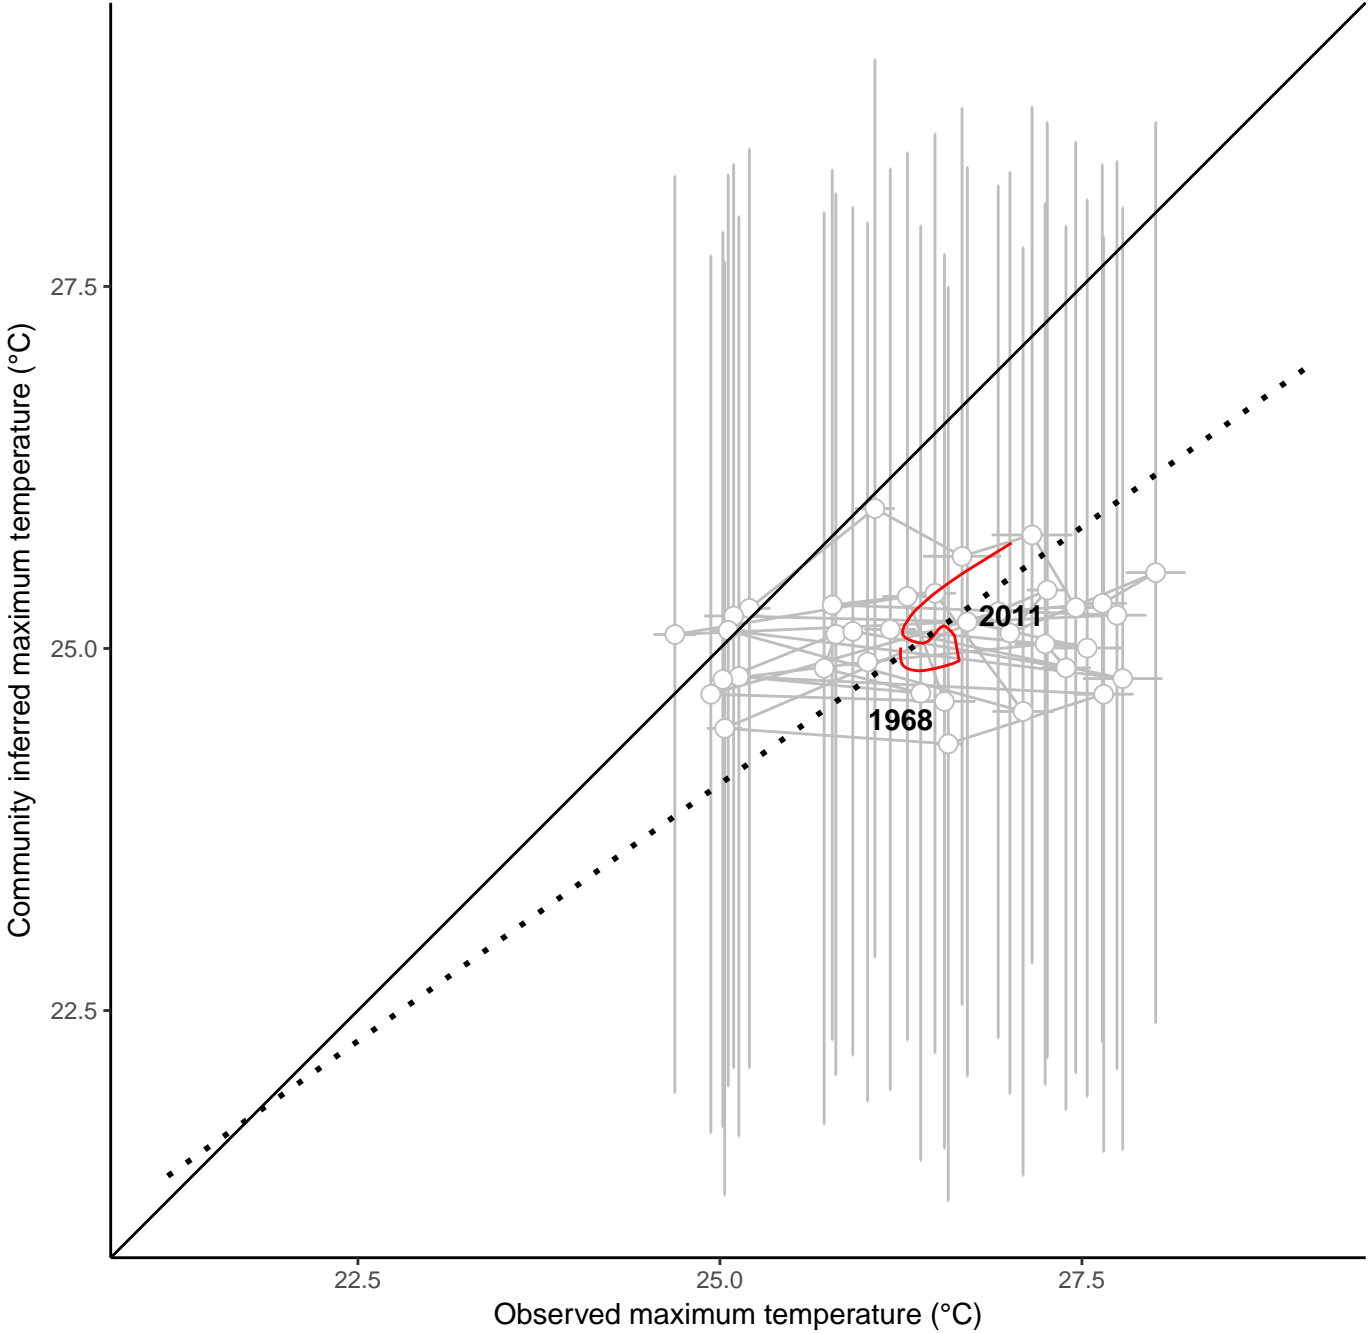

site : 840\_81\_29

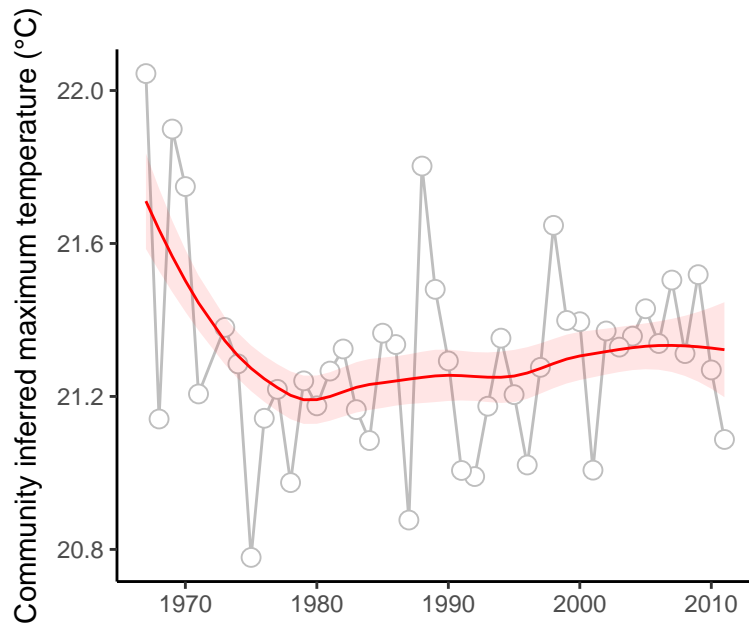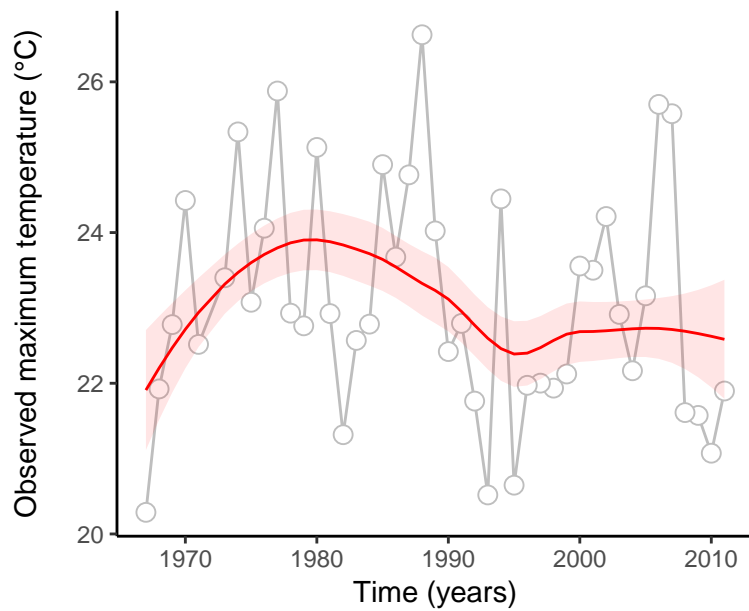

absolute deviation = 1.71 | deviation change = 1.06 | maximum state number = 1

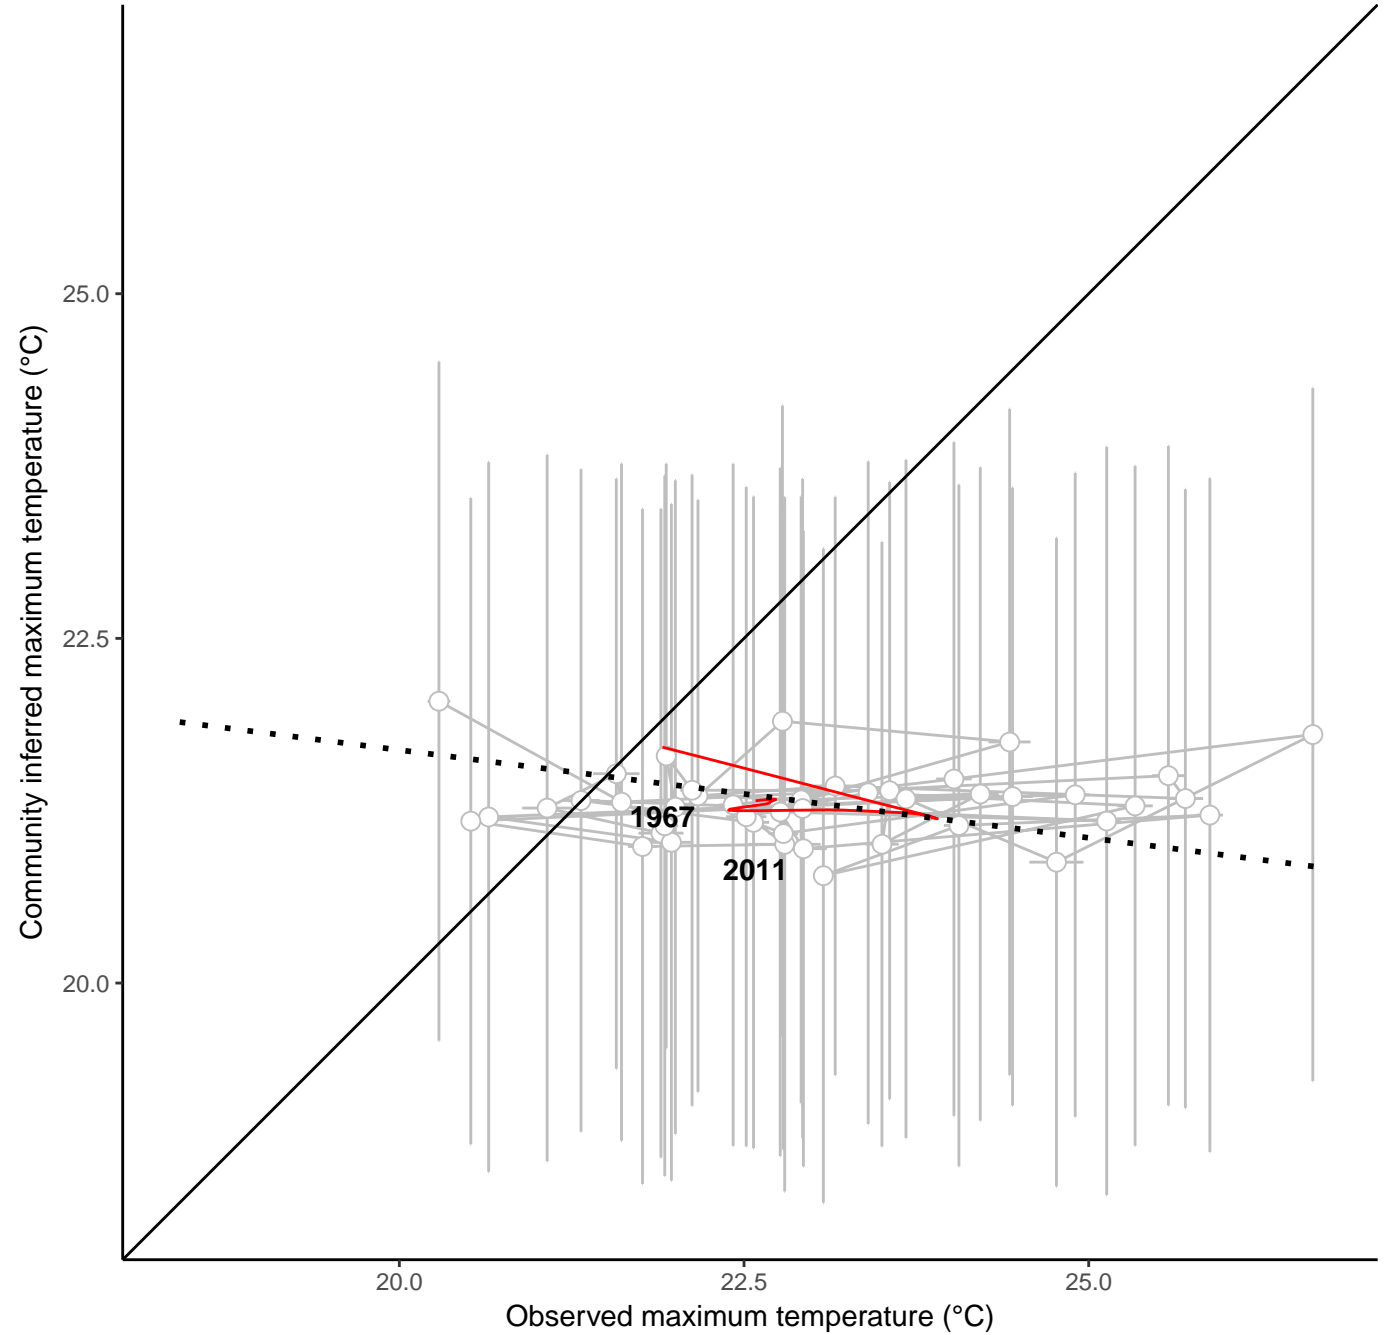

site : 840\_82\_32

absolute deviation = 2.02 | deviation change = 1.23 | maximum state number = 1

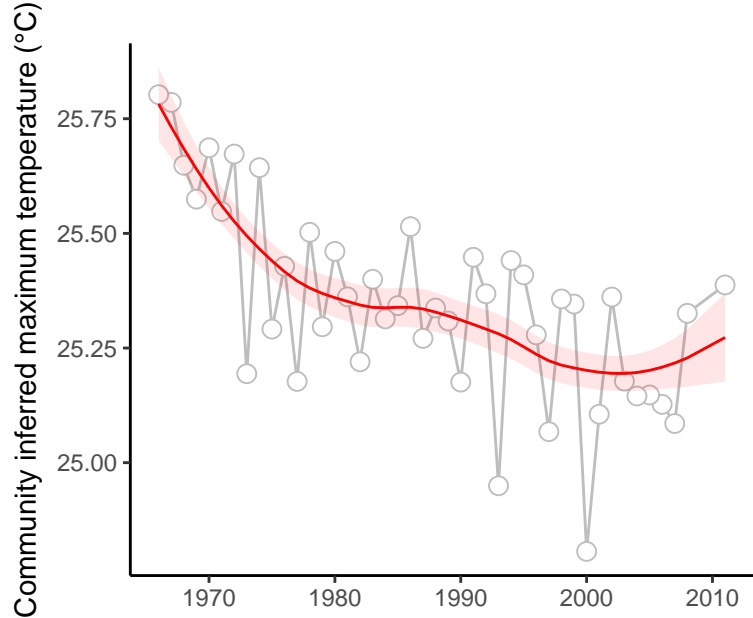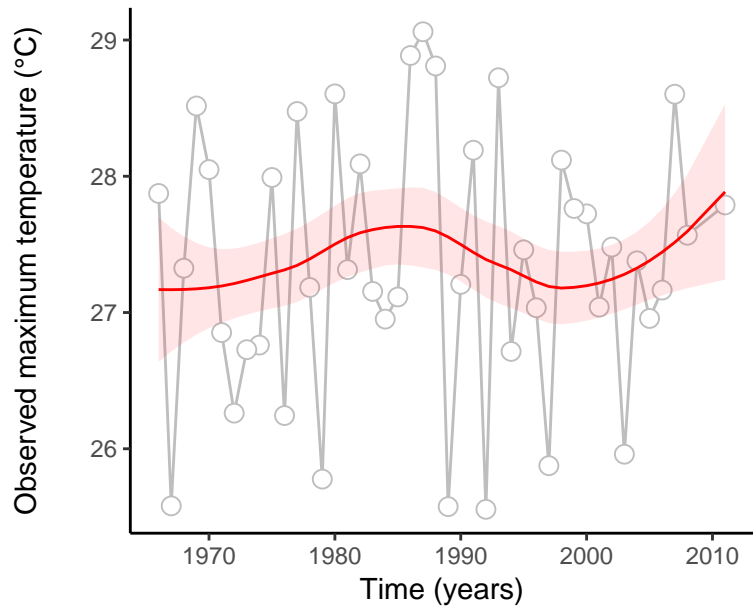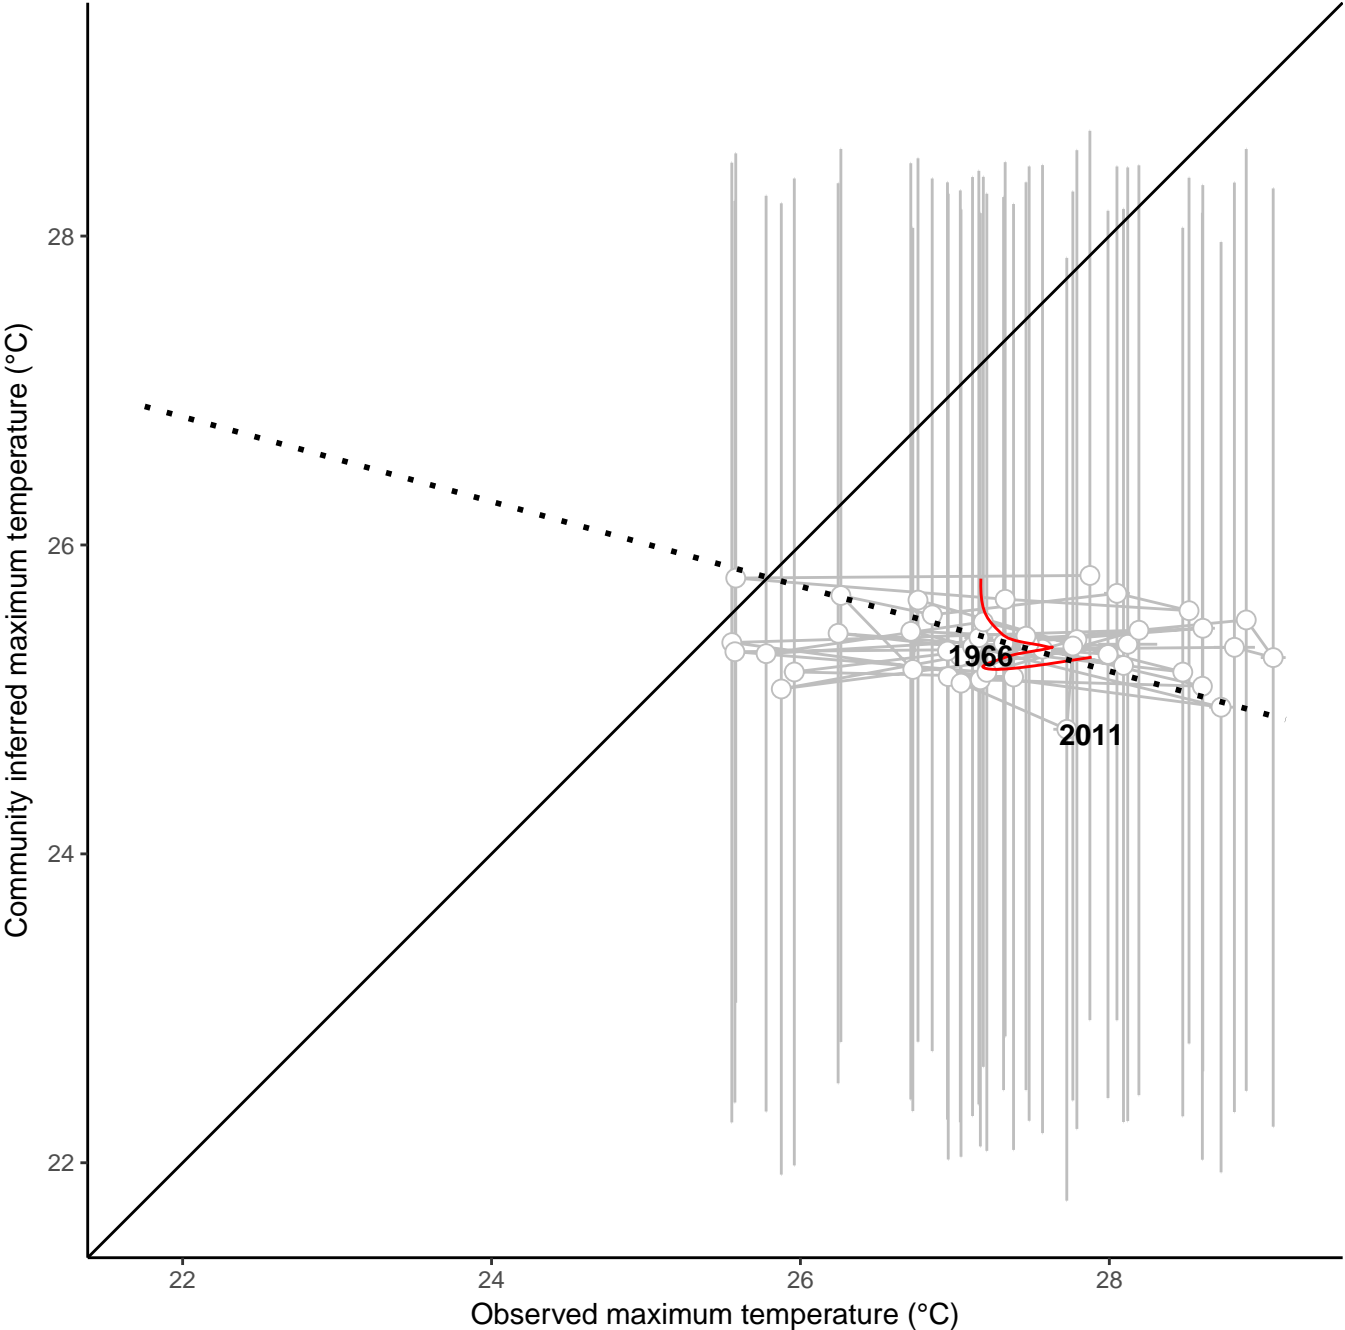

site : 840\_82\_34

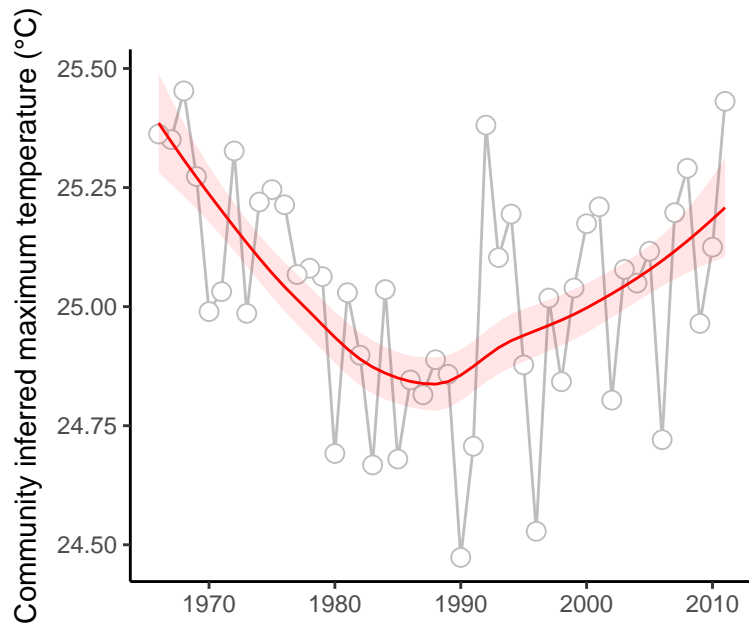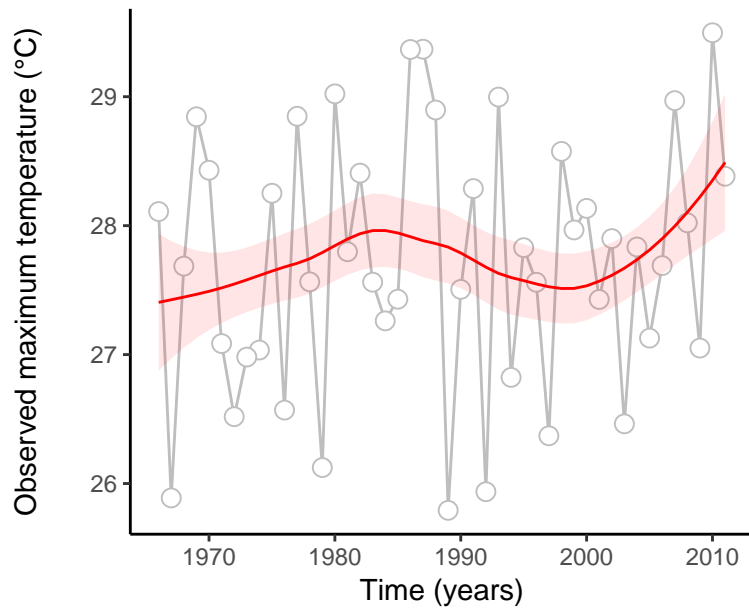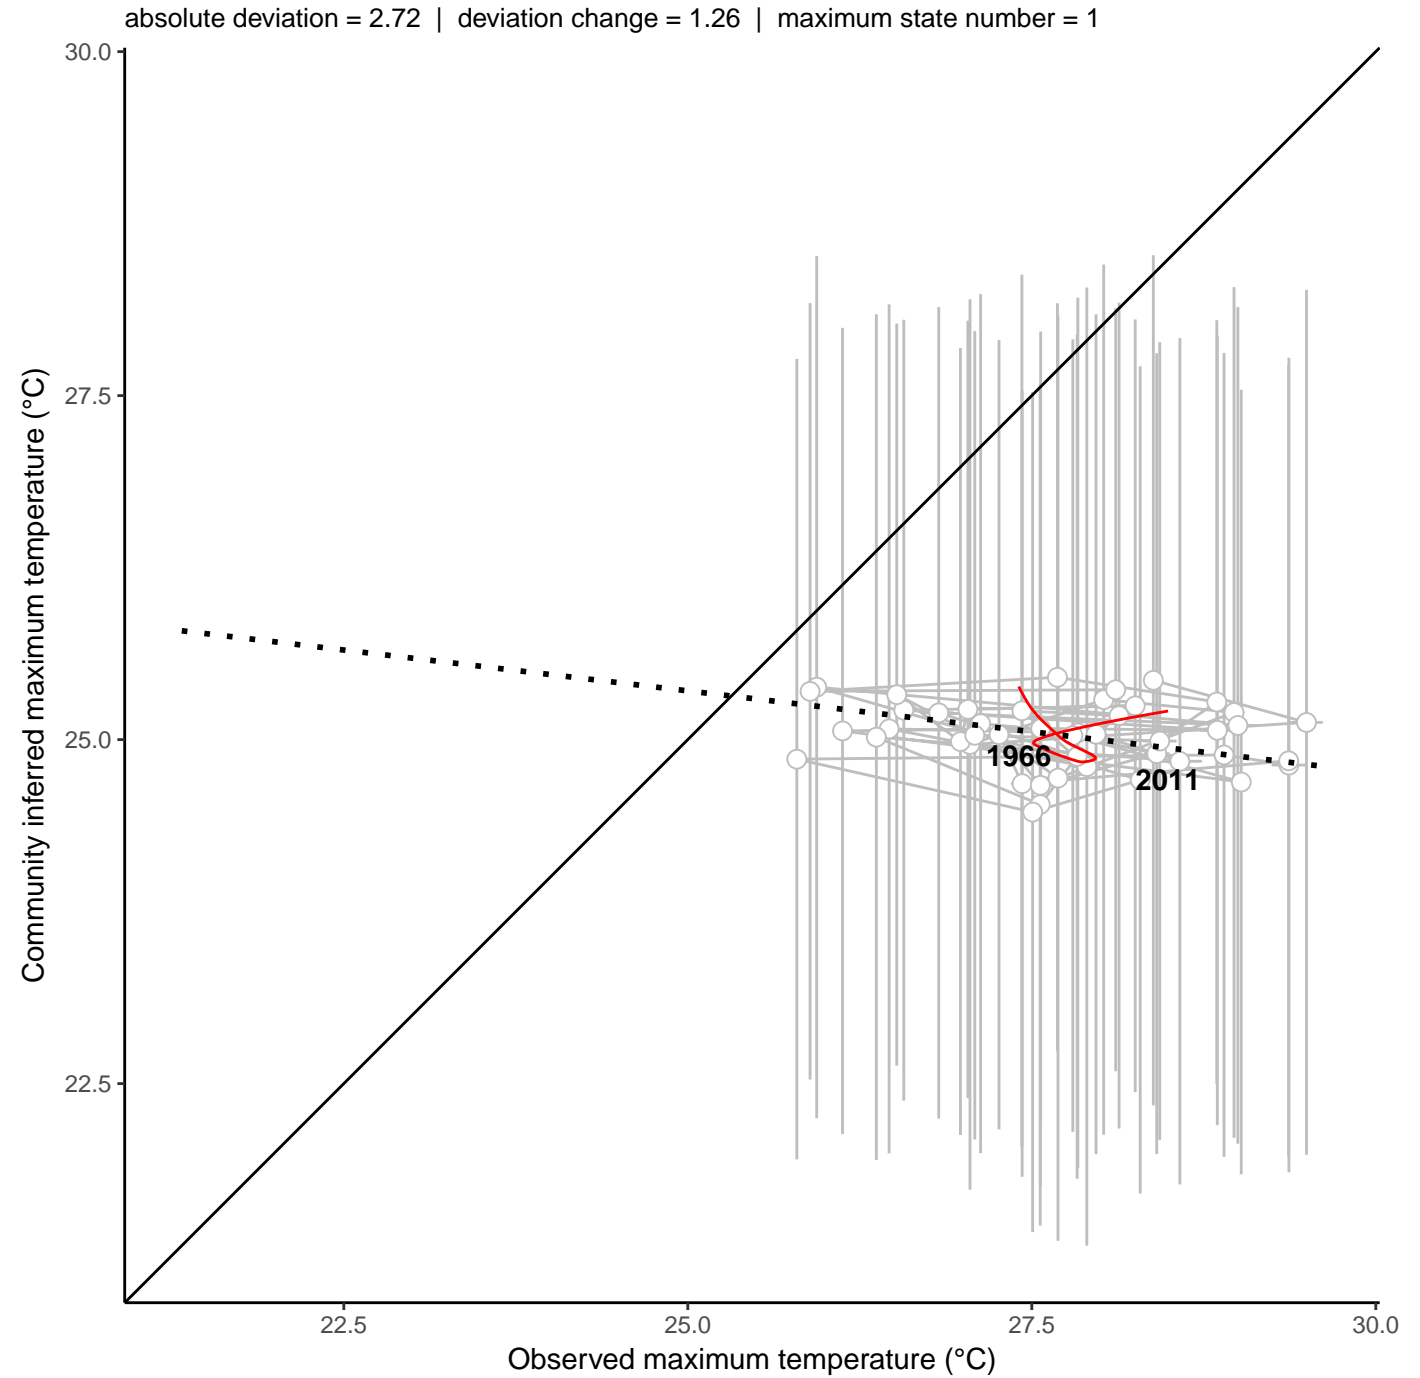



site : 840\_17\_9

absolute deviation = 1.45 | deviation change = 1.22 | maximum state number = 1

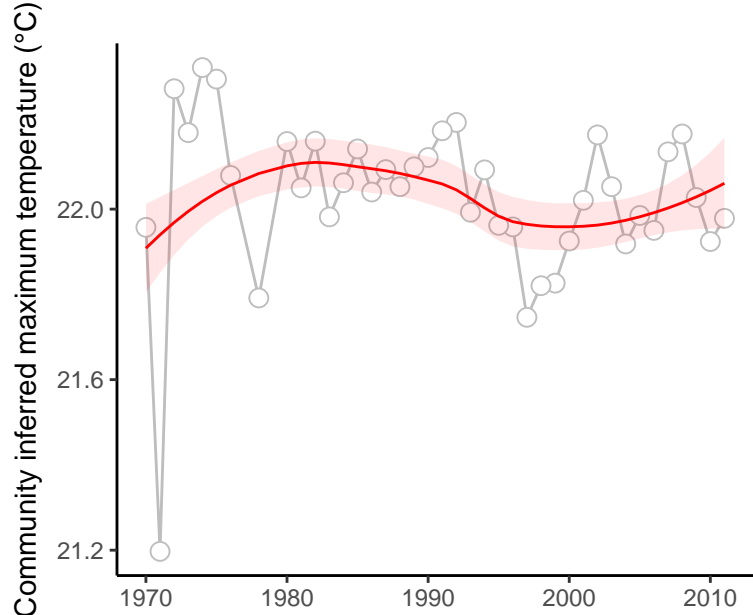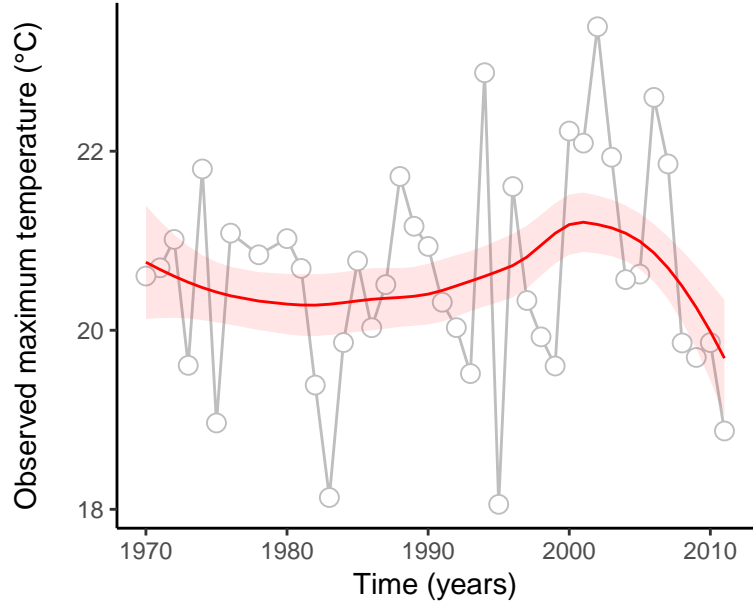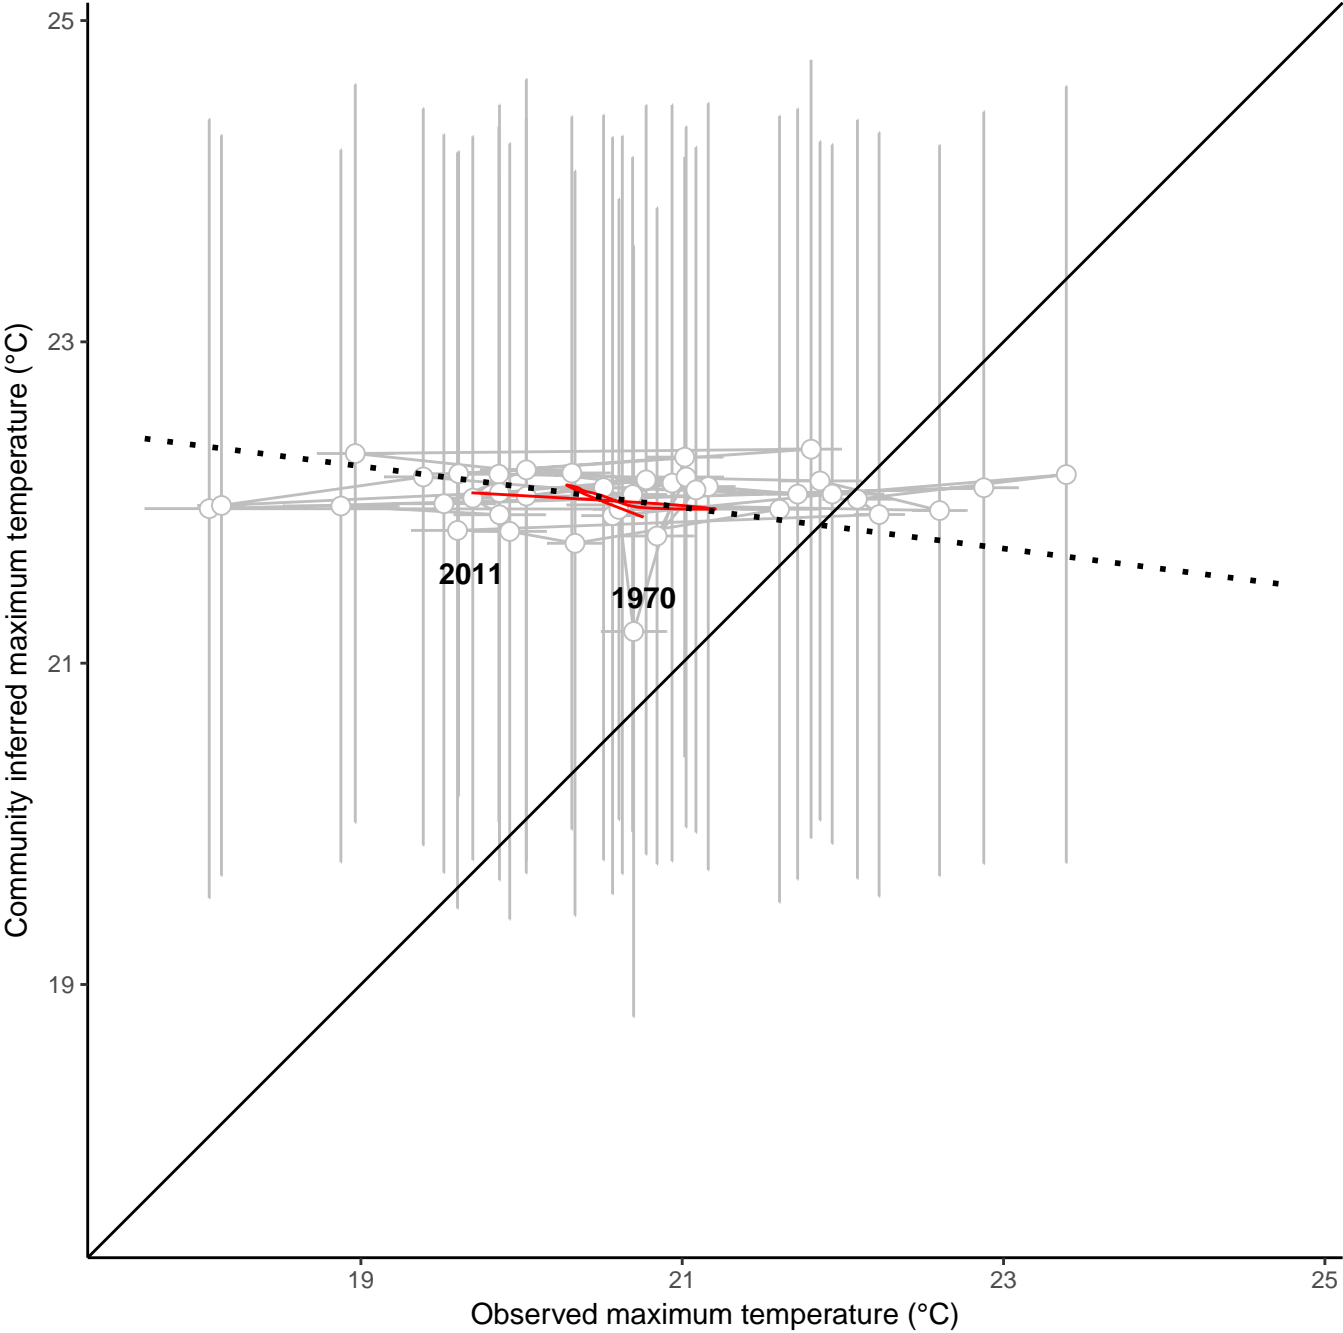

site : 840\_34\_25

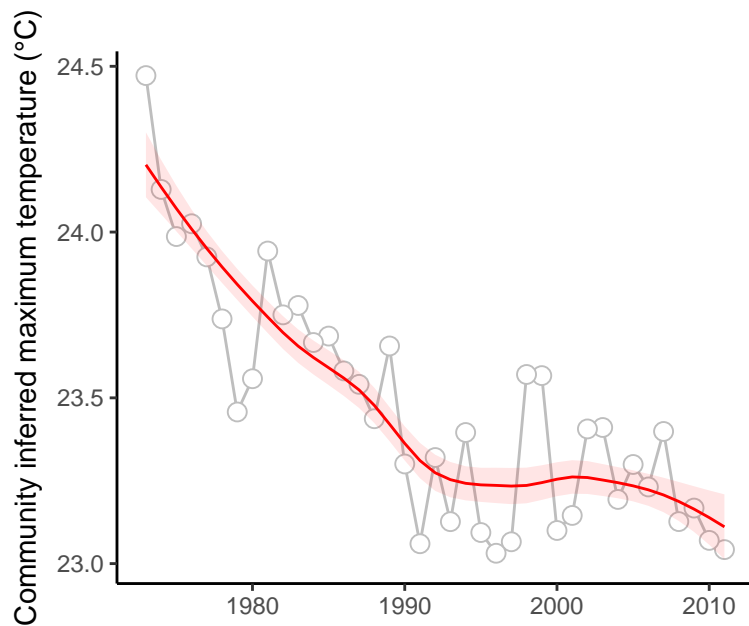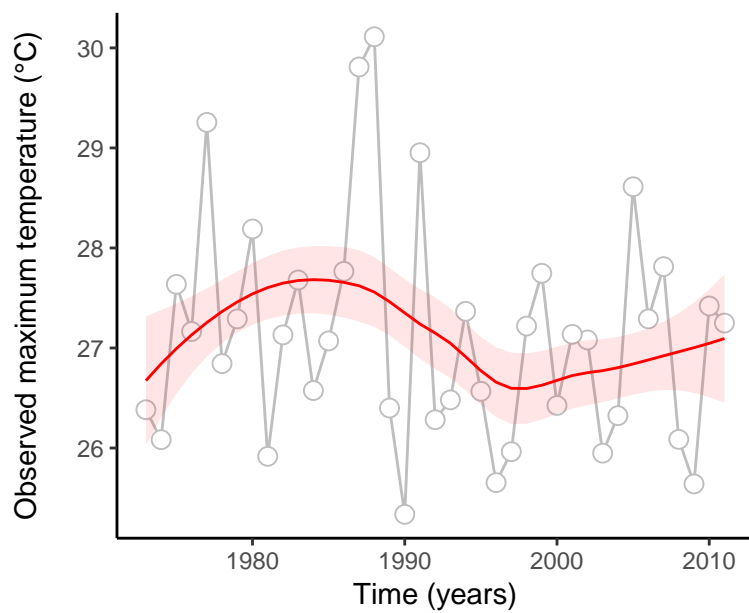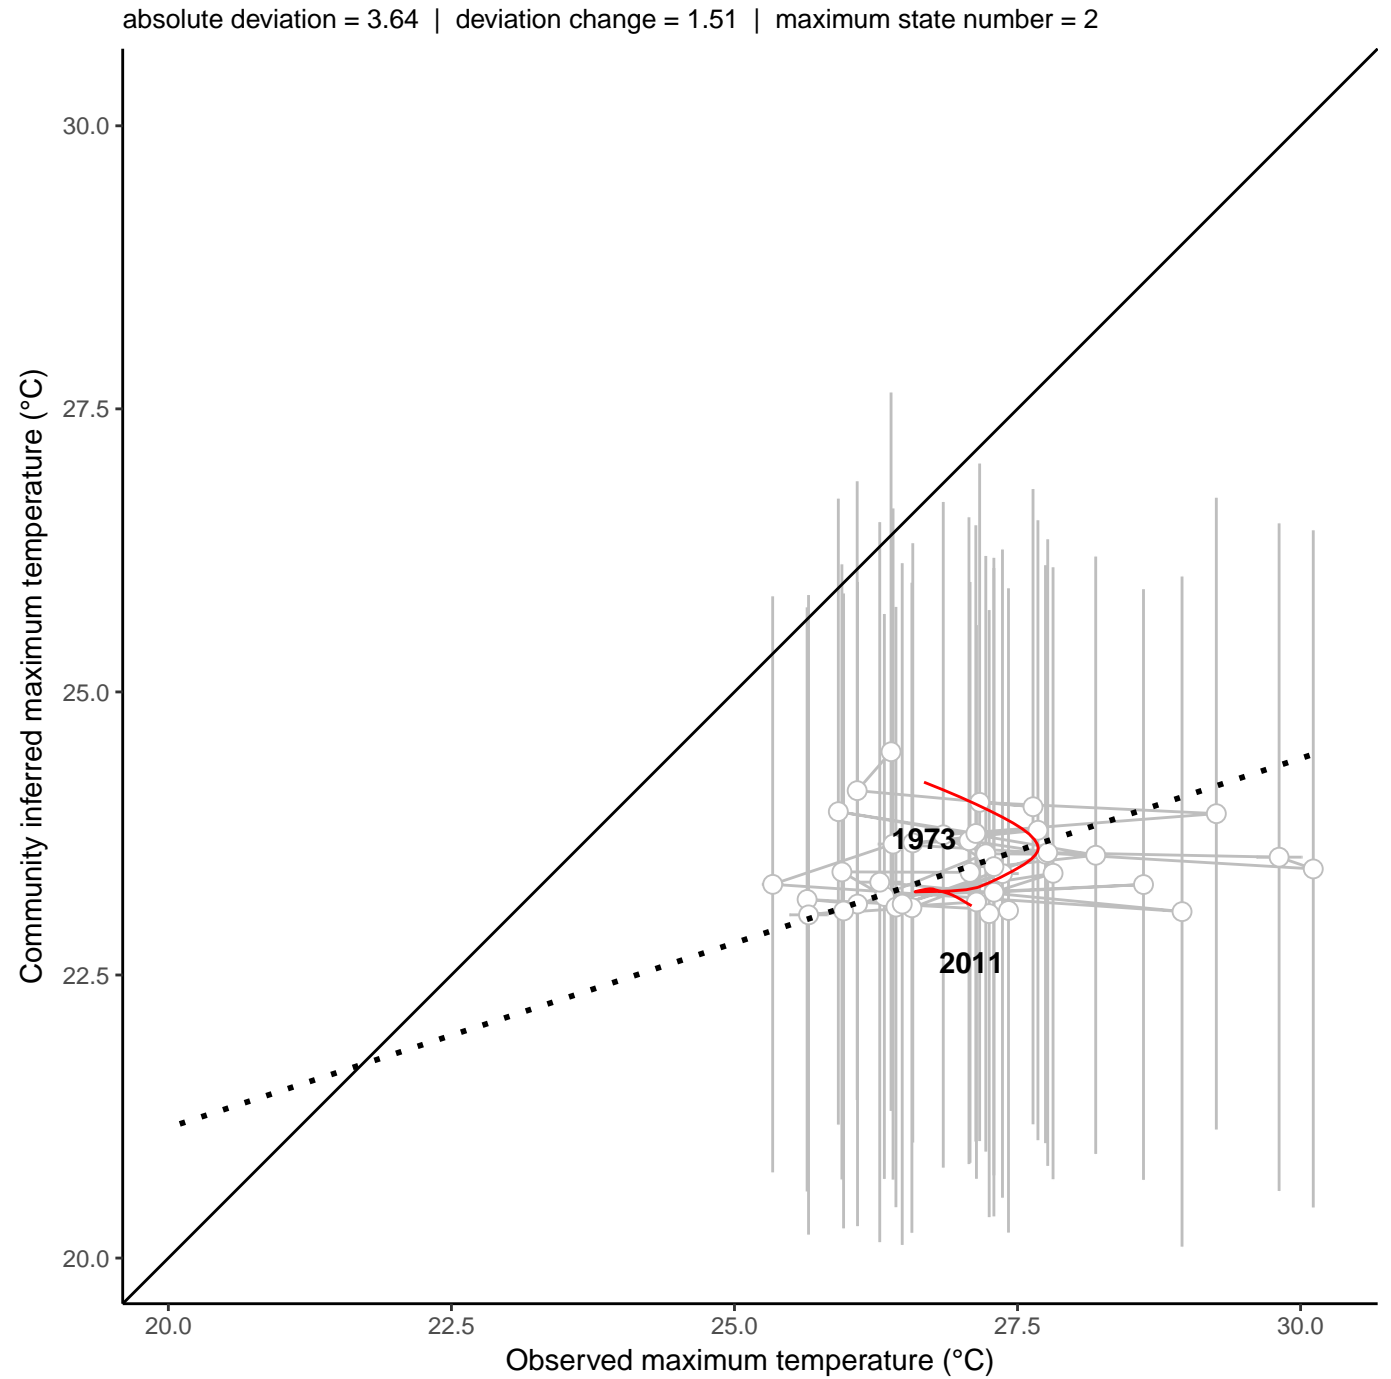

site : 840\_38\_10

absolute deviation = 5.82 | deviation change = -0.11 | maximum state number = 1

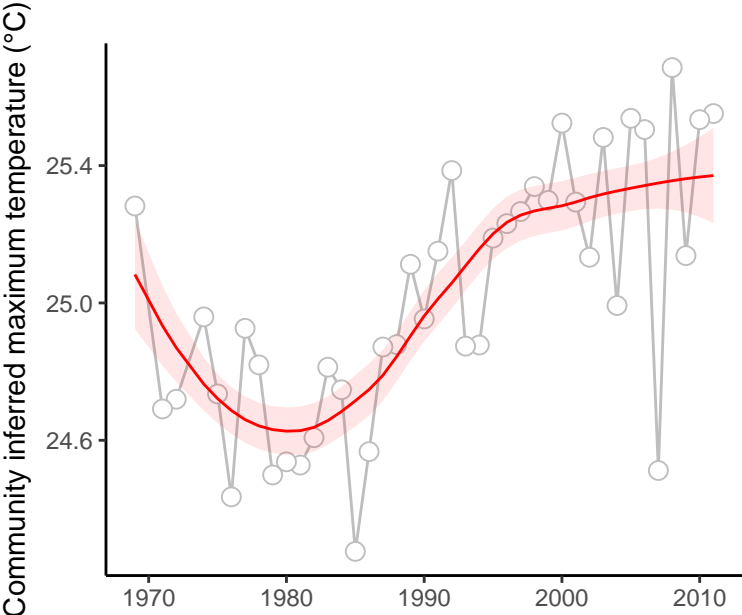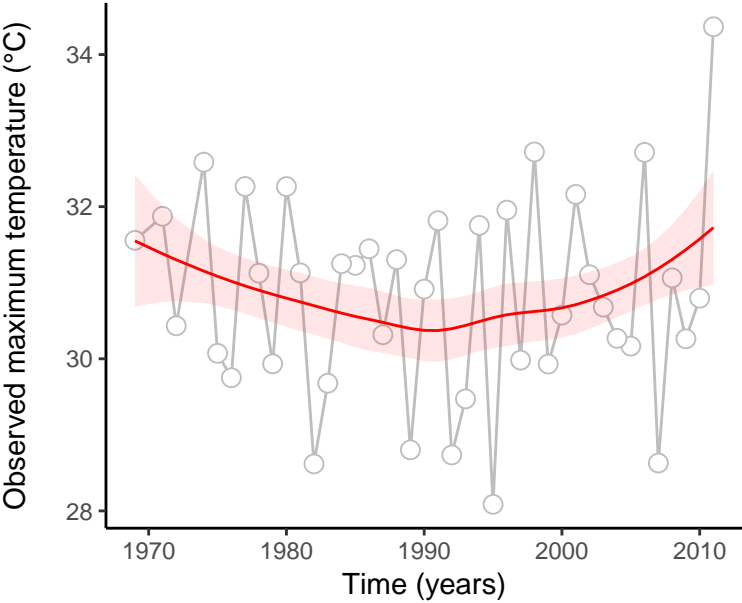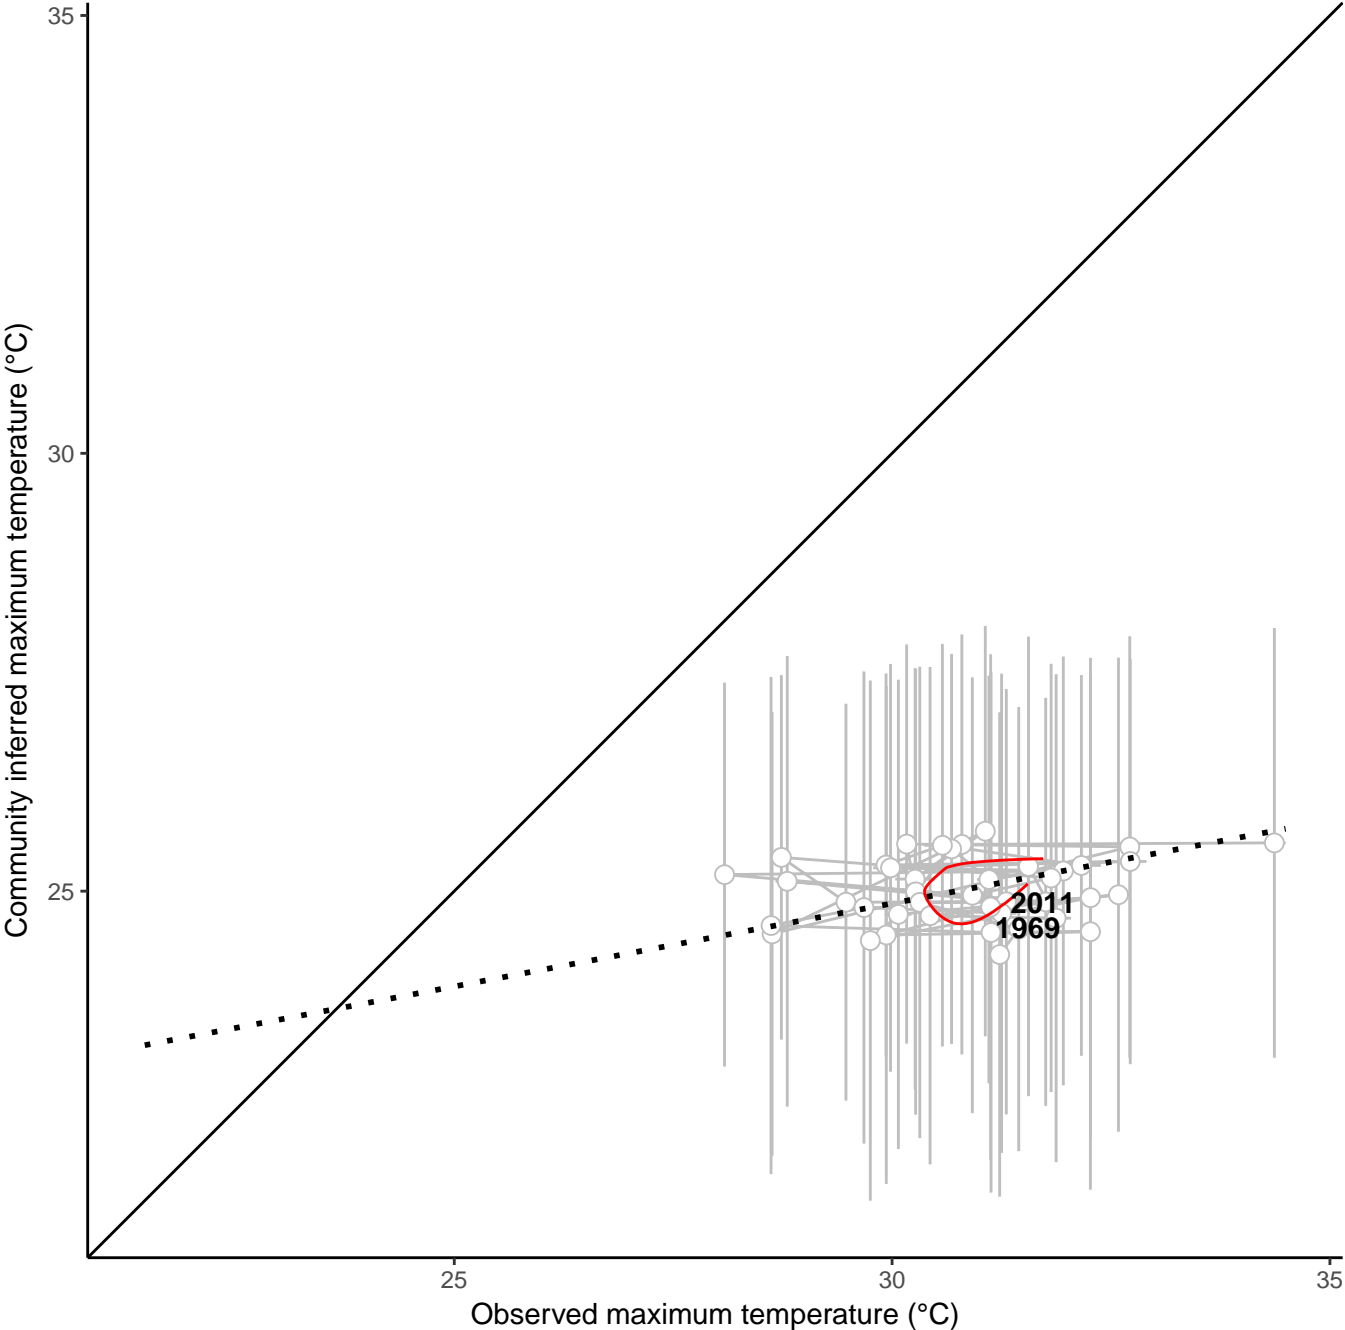

site : 840\_39\_39

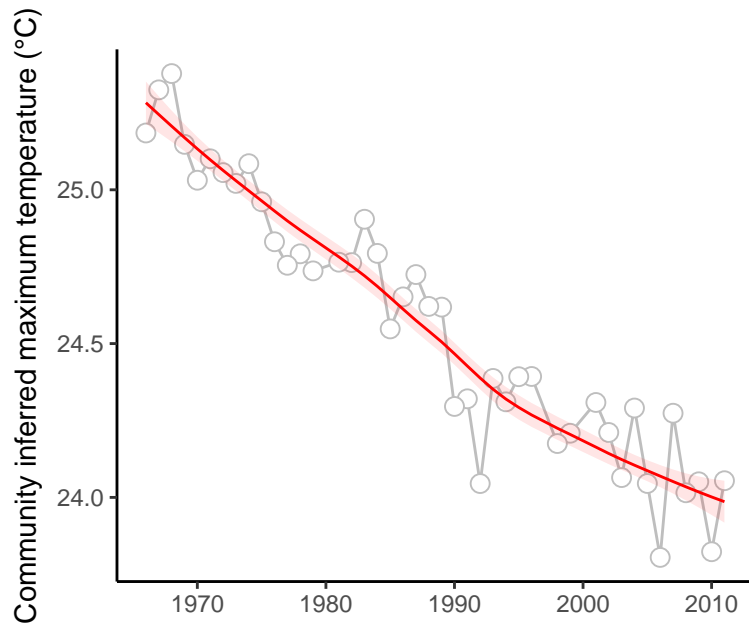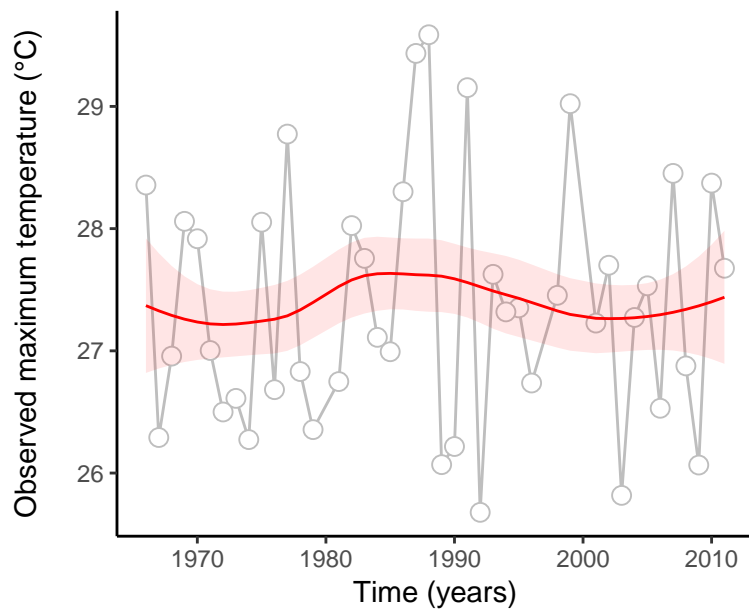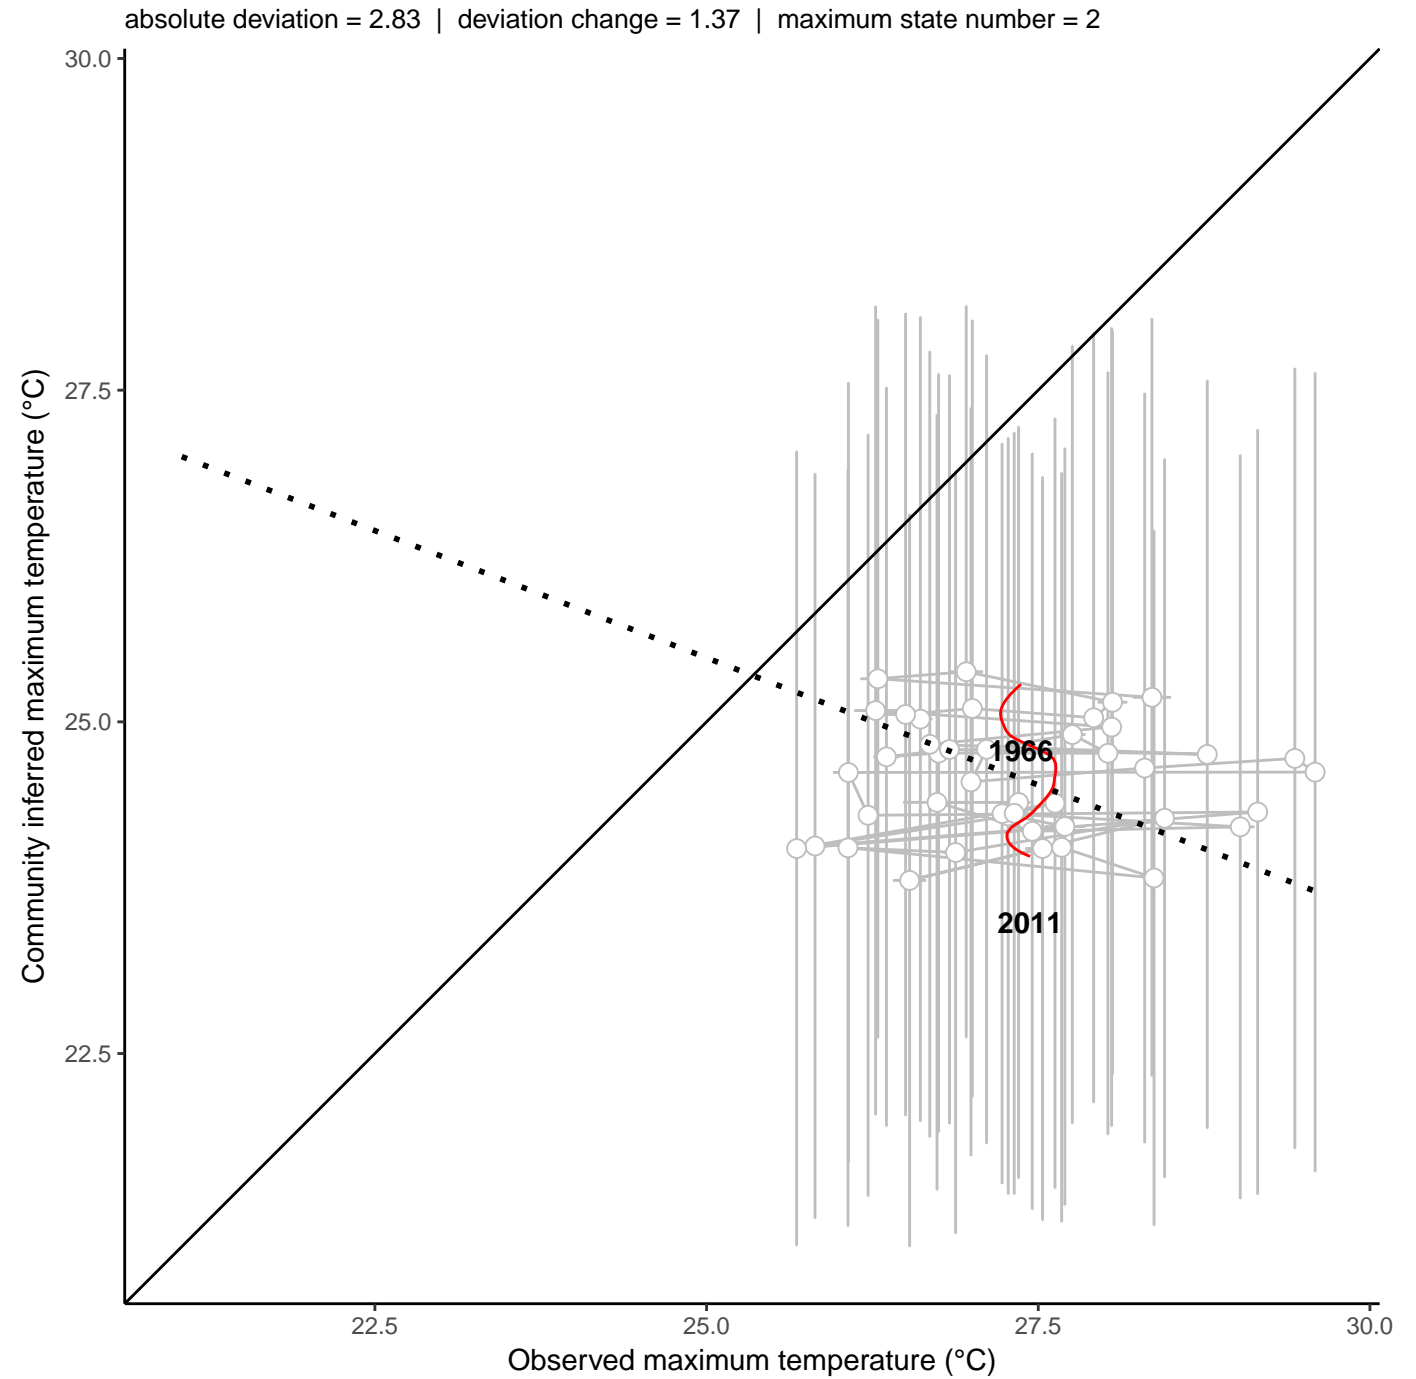

site : 840\_42\_11

absolute deviation = 5.1 | deviation change = 0.66 | maximum state number = 2

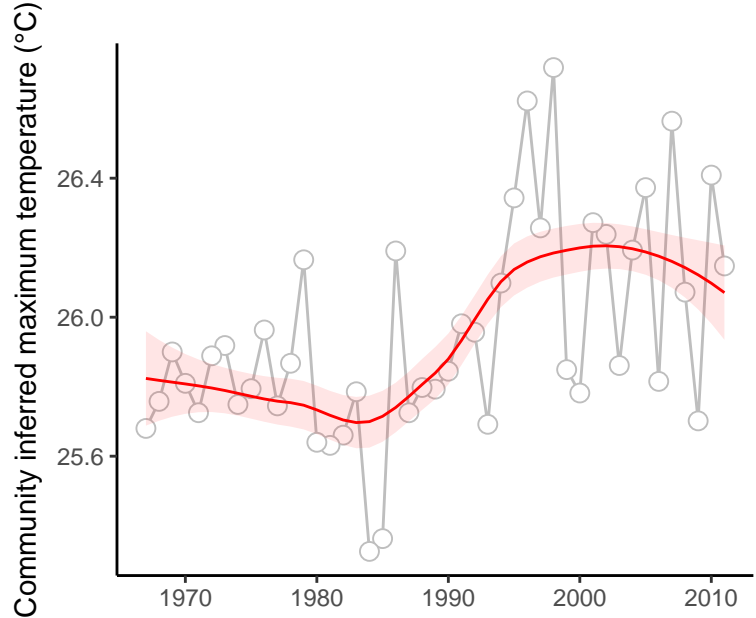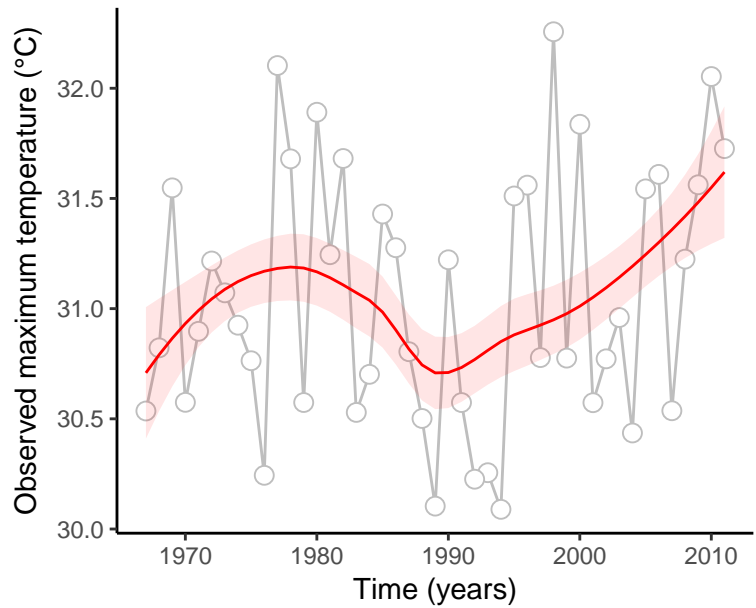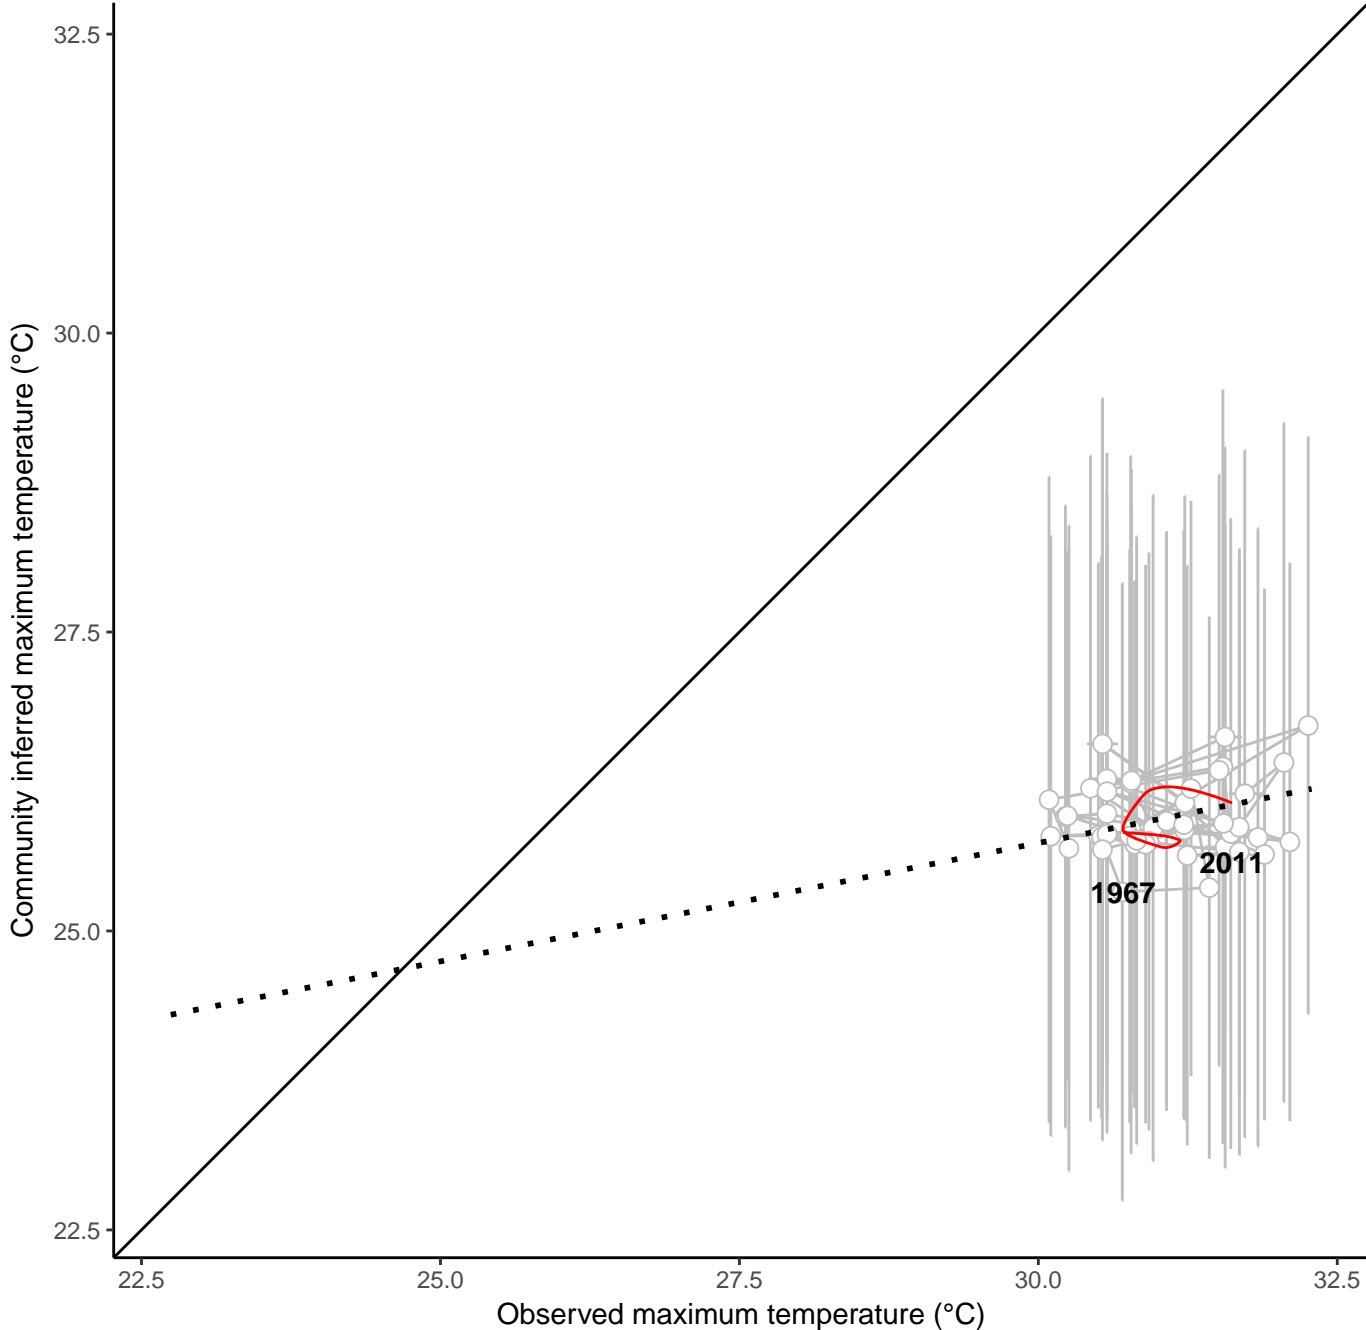

site : 840\_46\_6

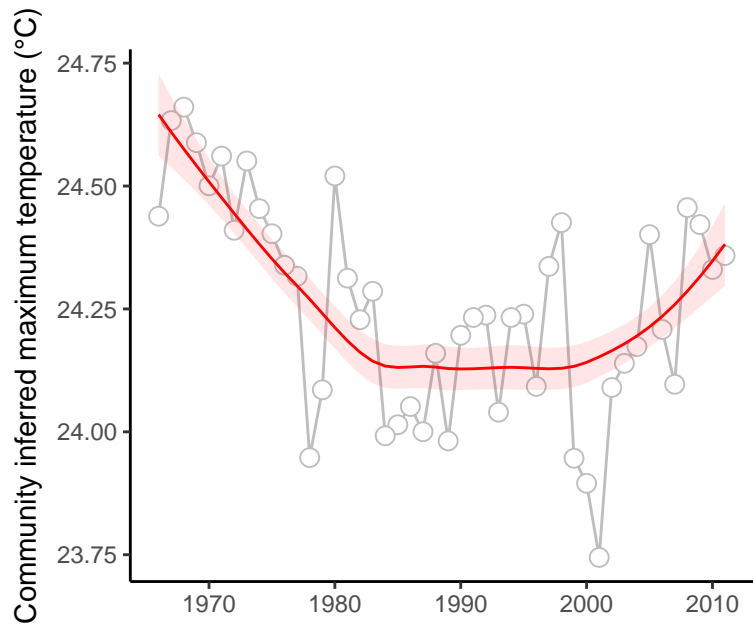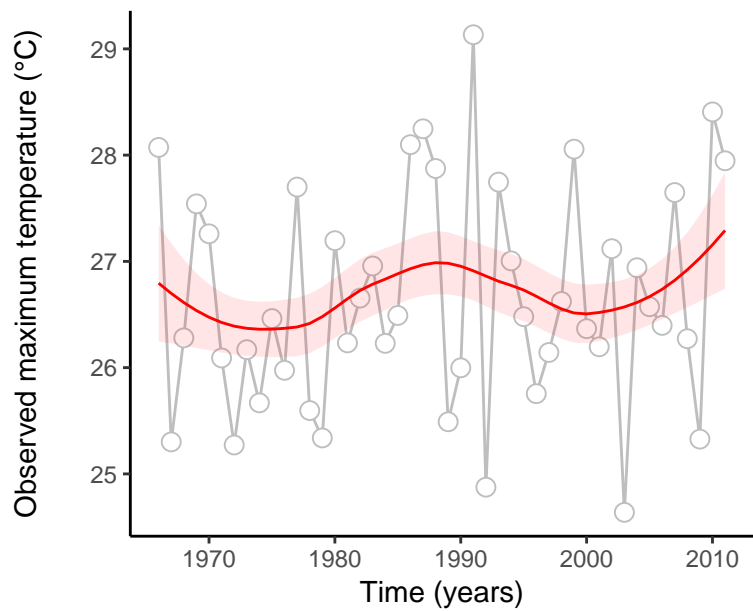

absolute deviation = 2.43 | deviation change = 0.76 | maximum state number = 1

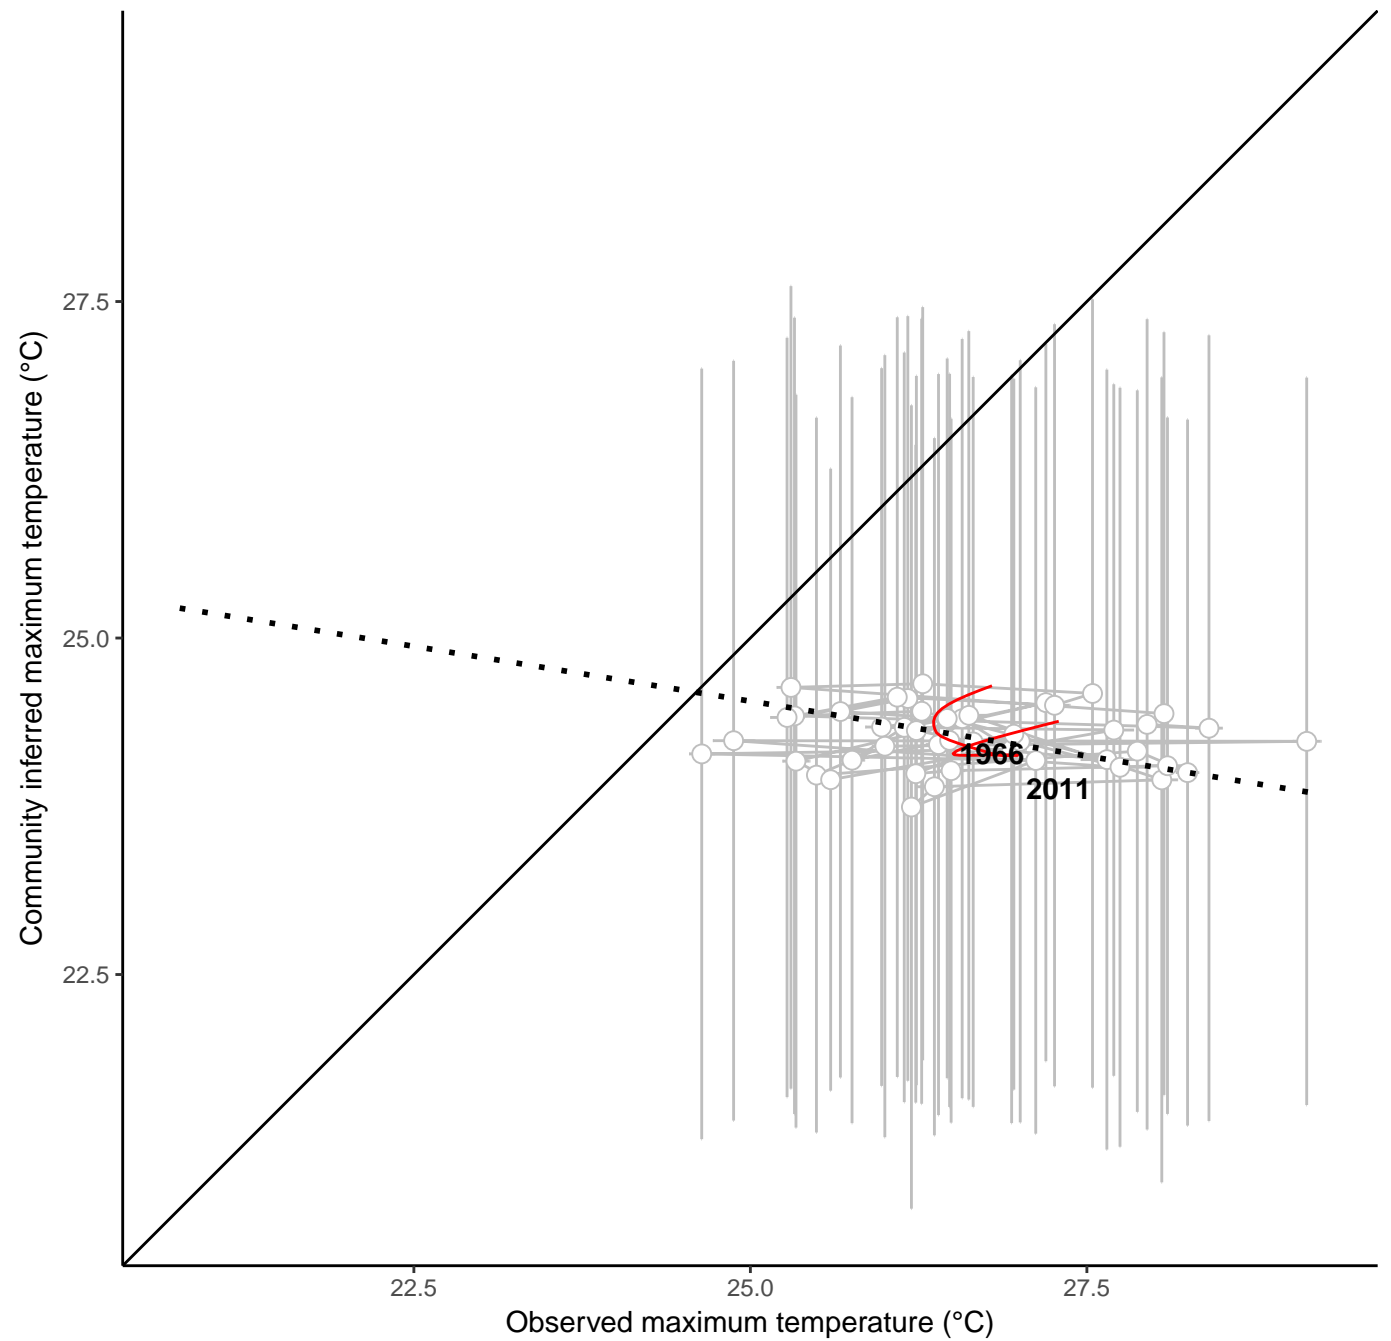

site : 840\_61\_16

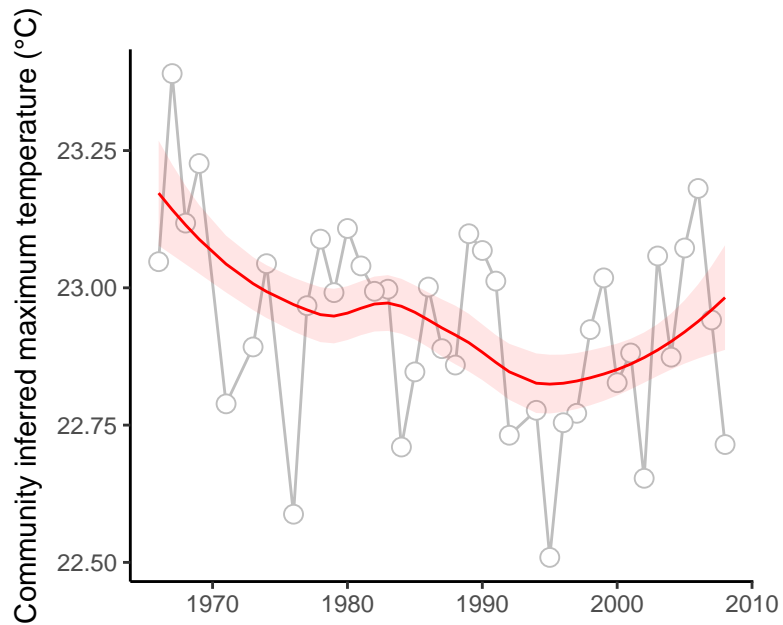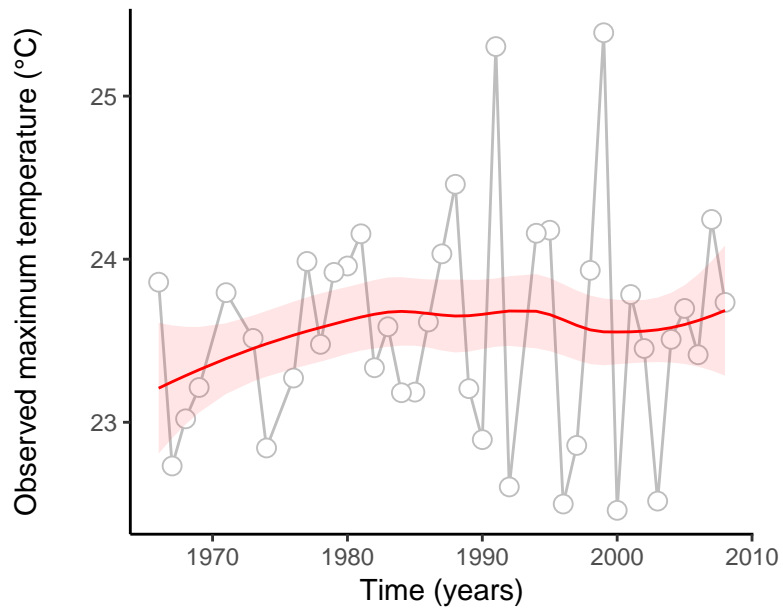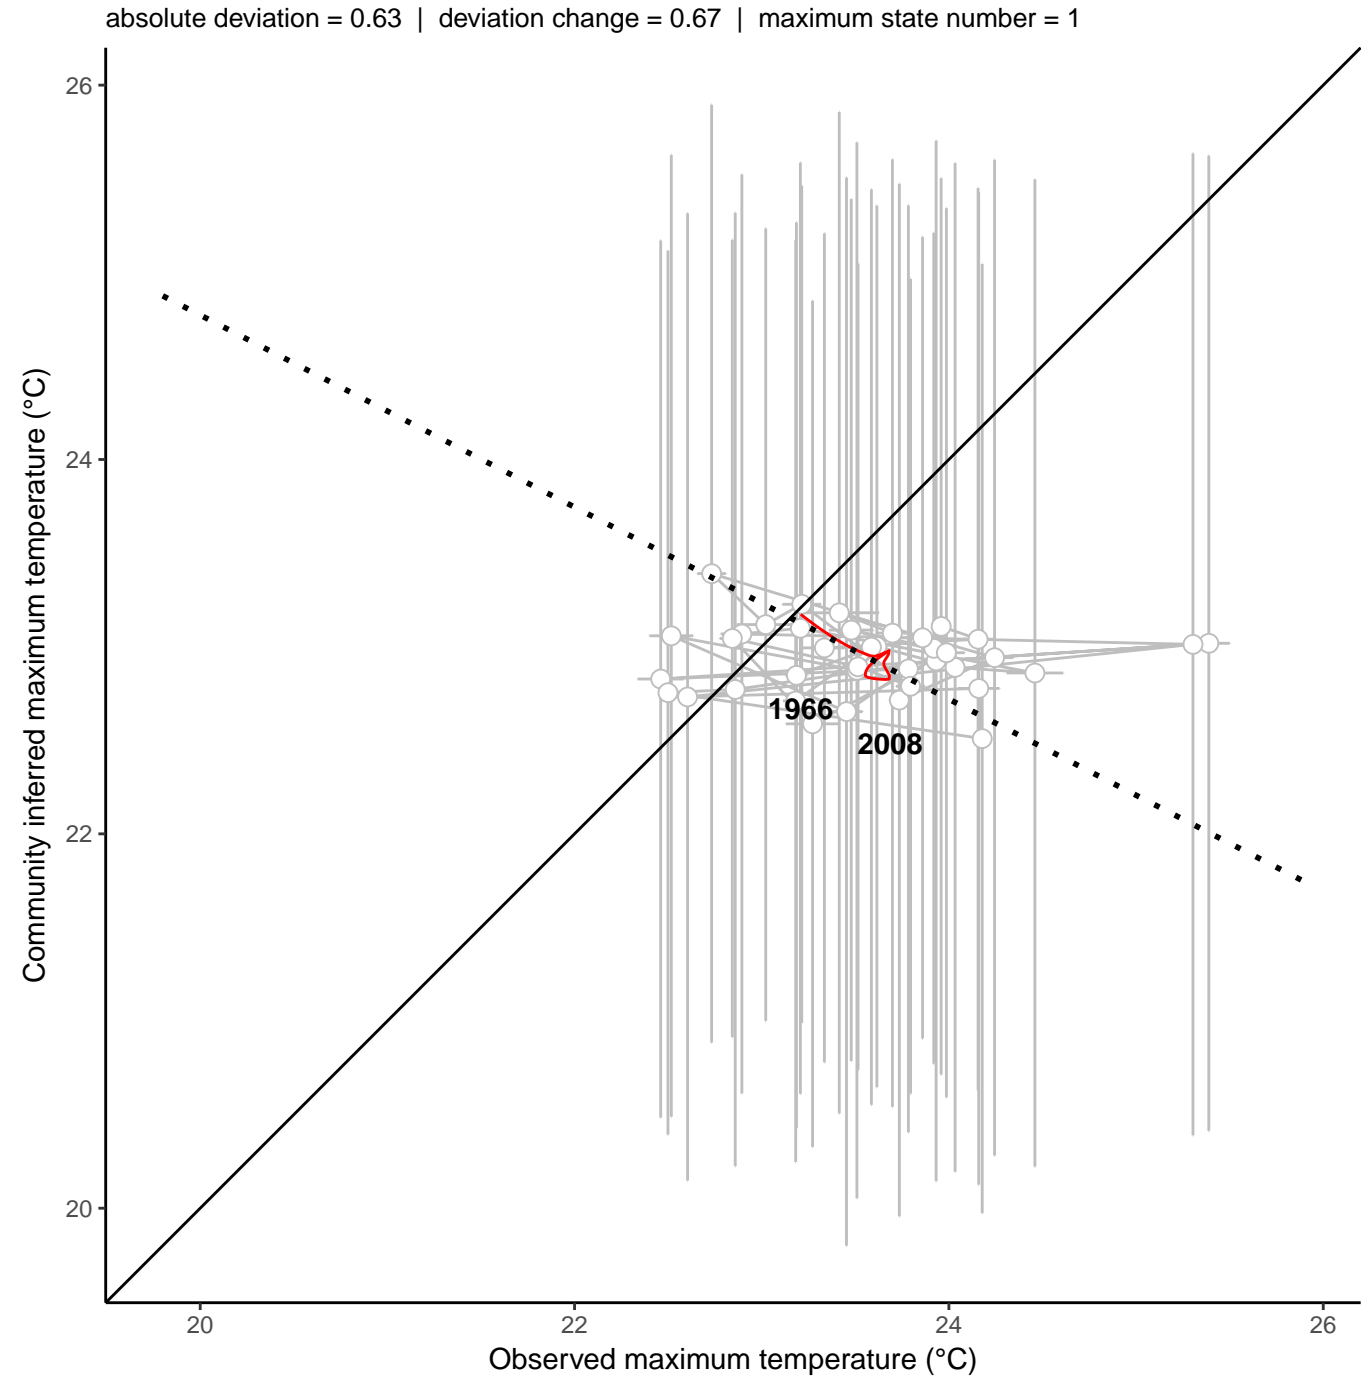

site : 840\_67\_20

absolute deviation = 4.69 | deviation change = -1.18 | maximum state number = 1

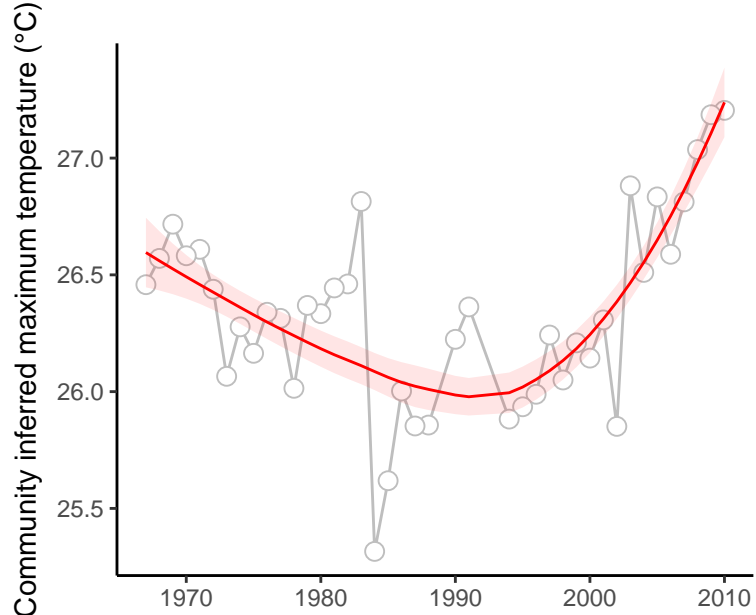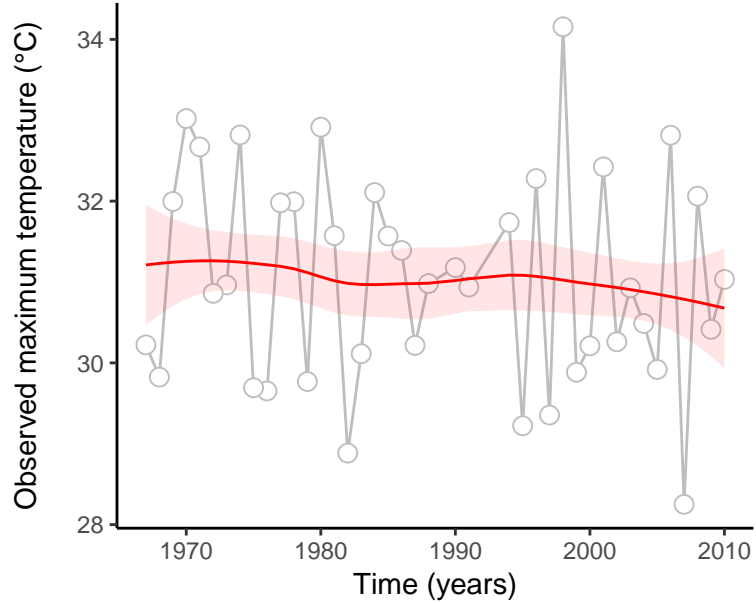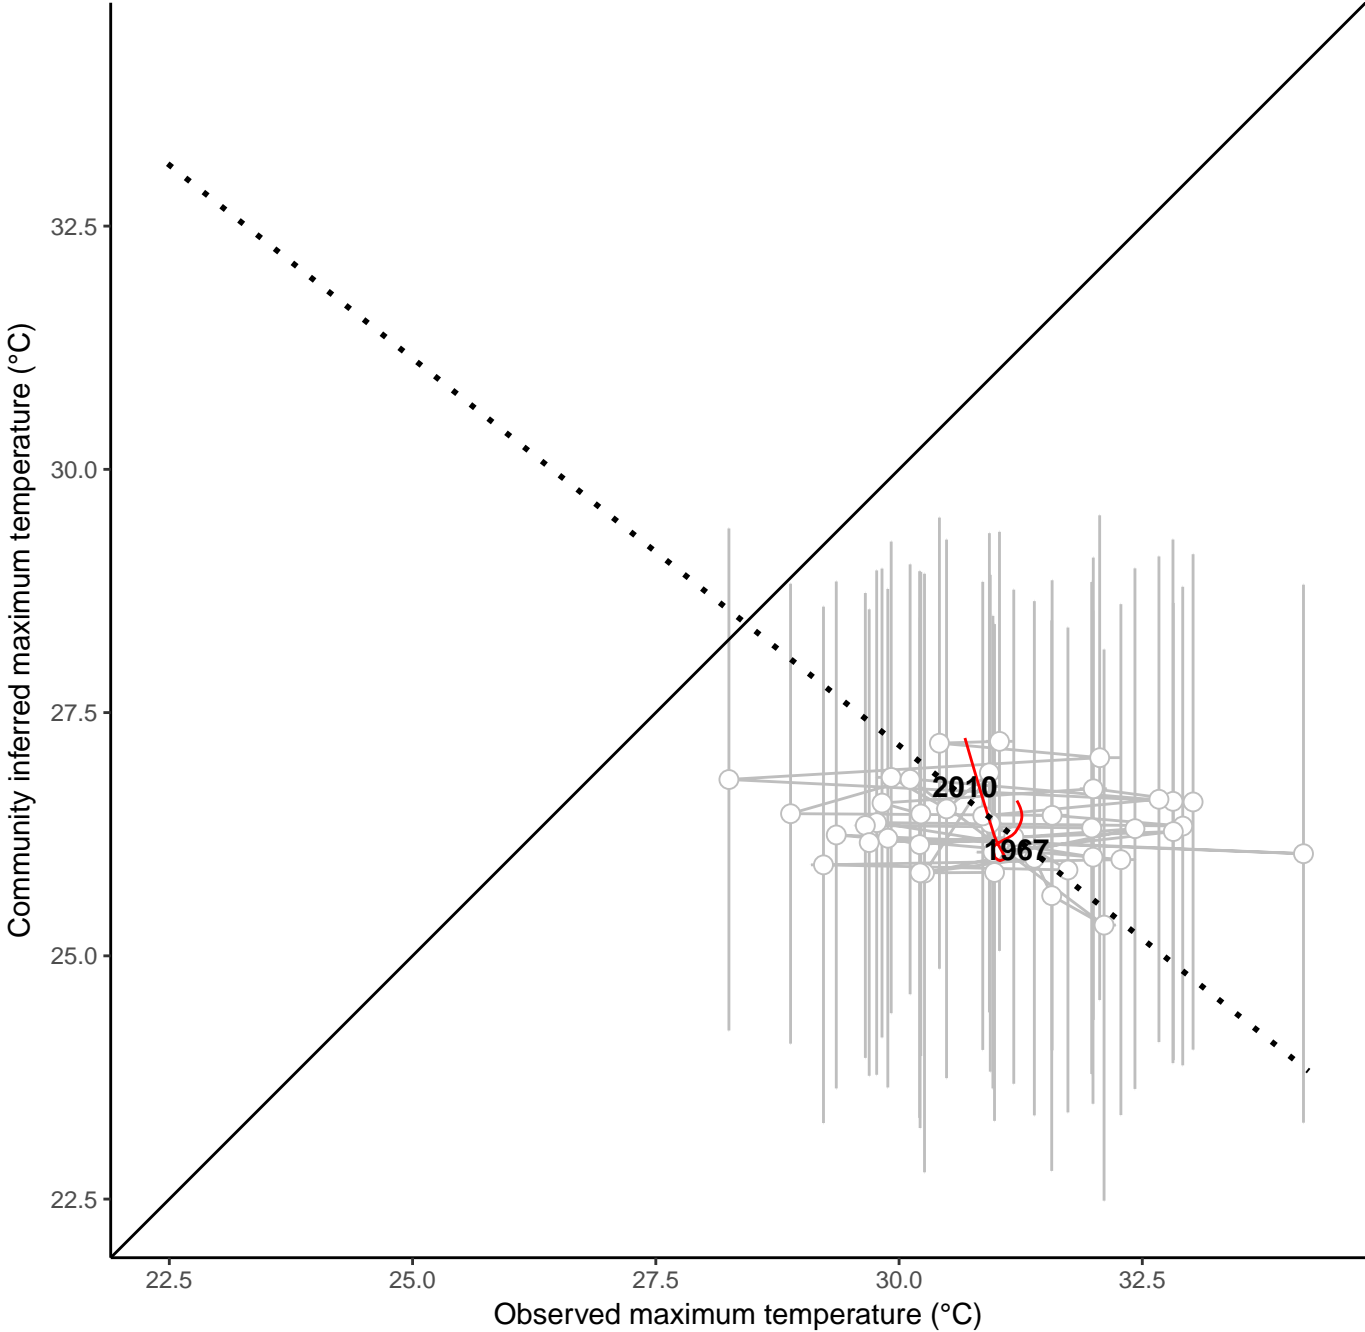



site : 840\_72\_33

absolute deviation = 0.56 | deviation change = 0.95 | maximum state number = 1

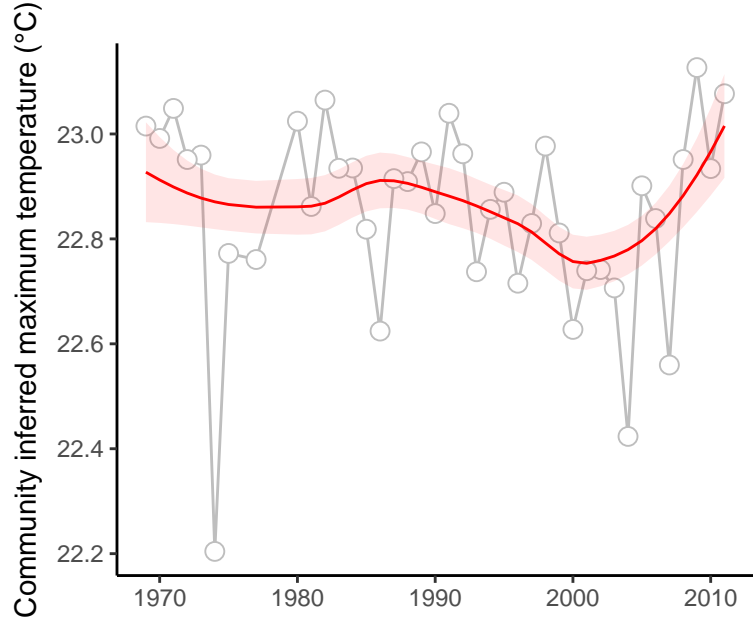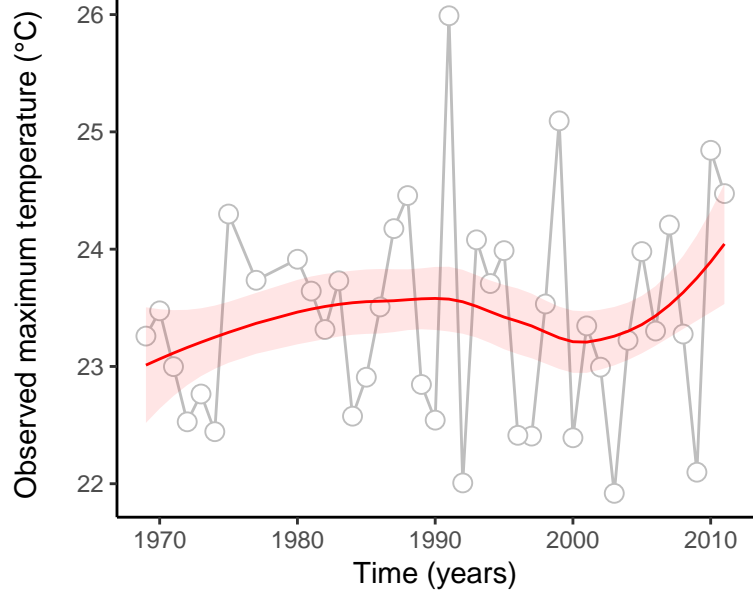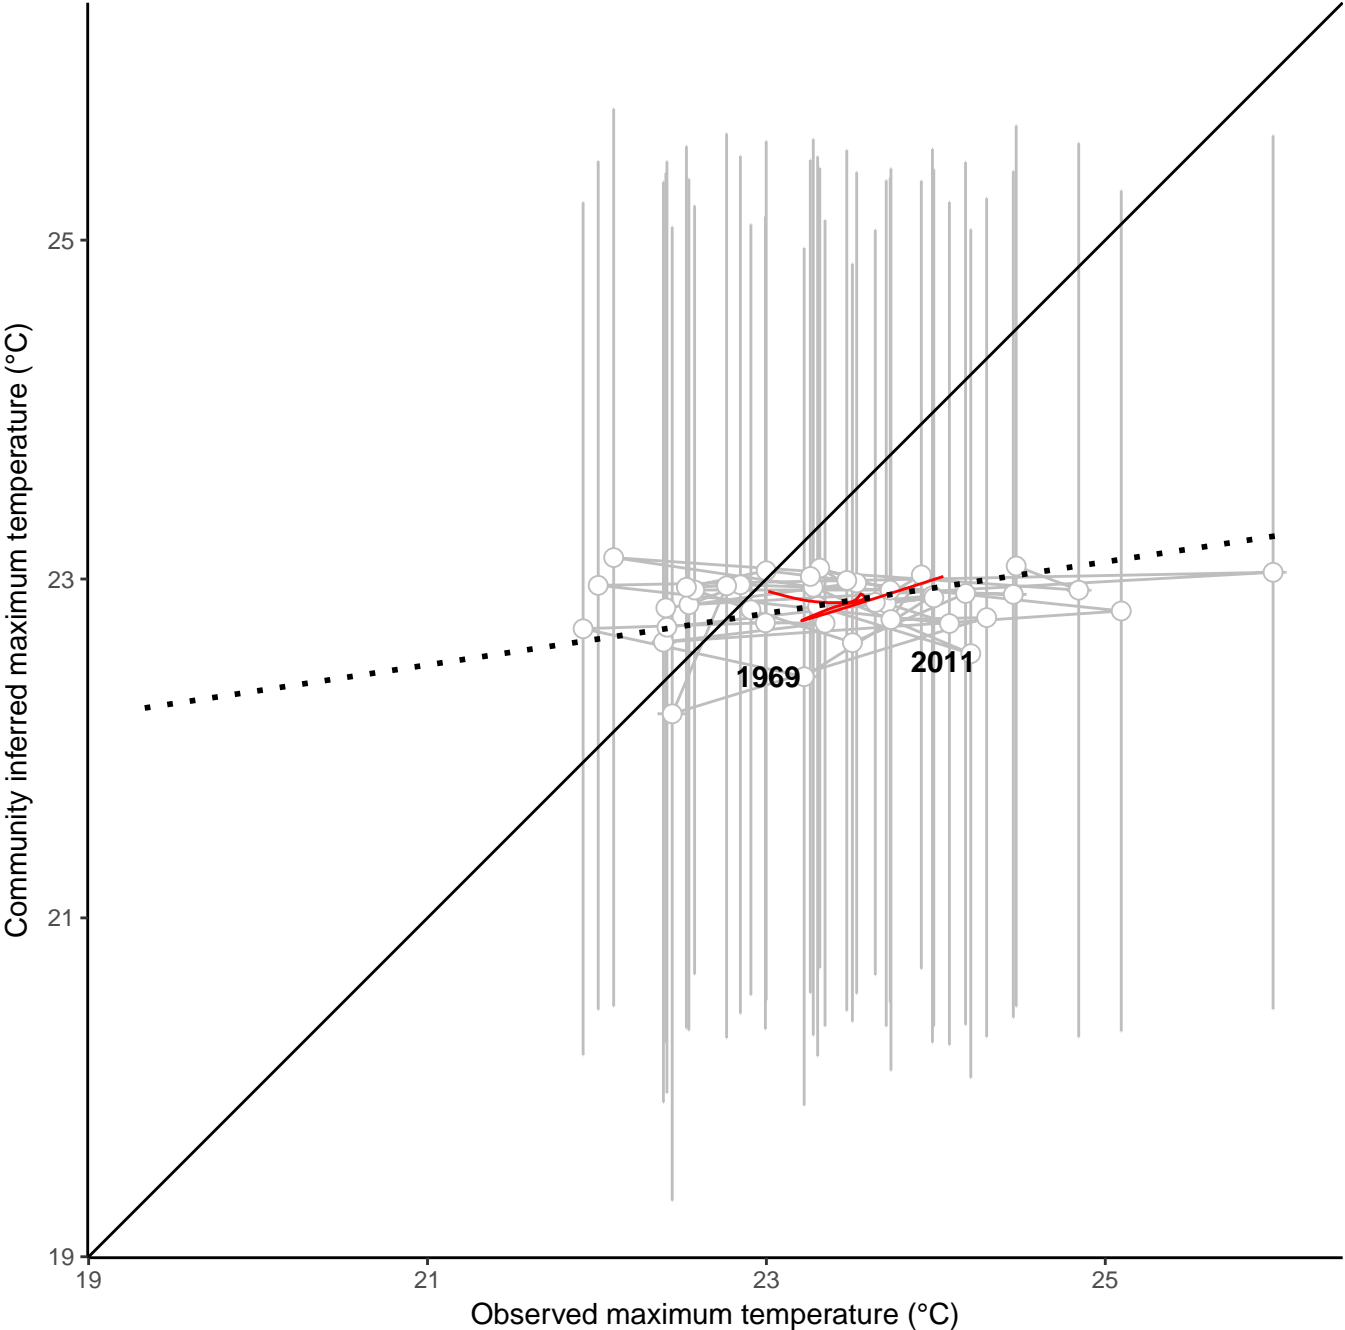

site : 840\_72\_79

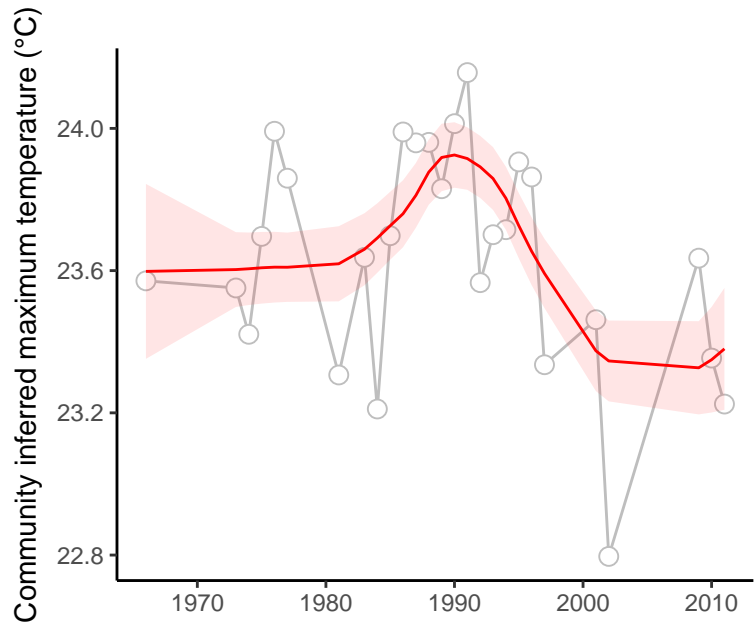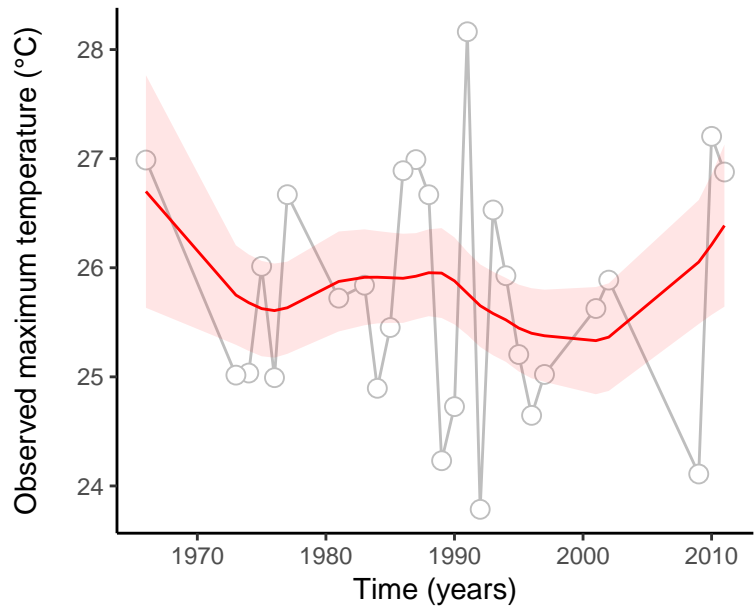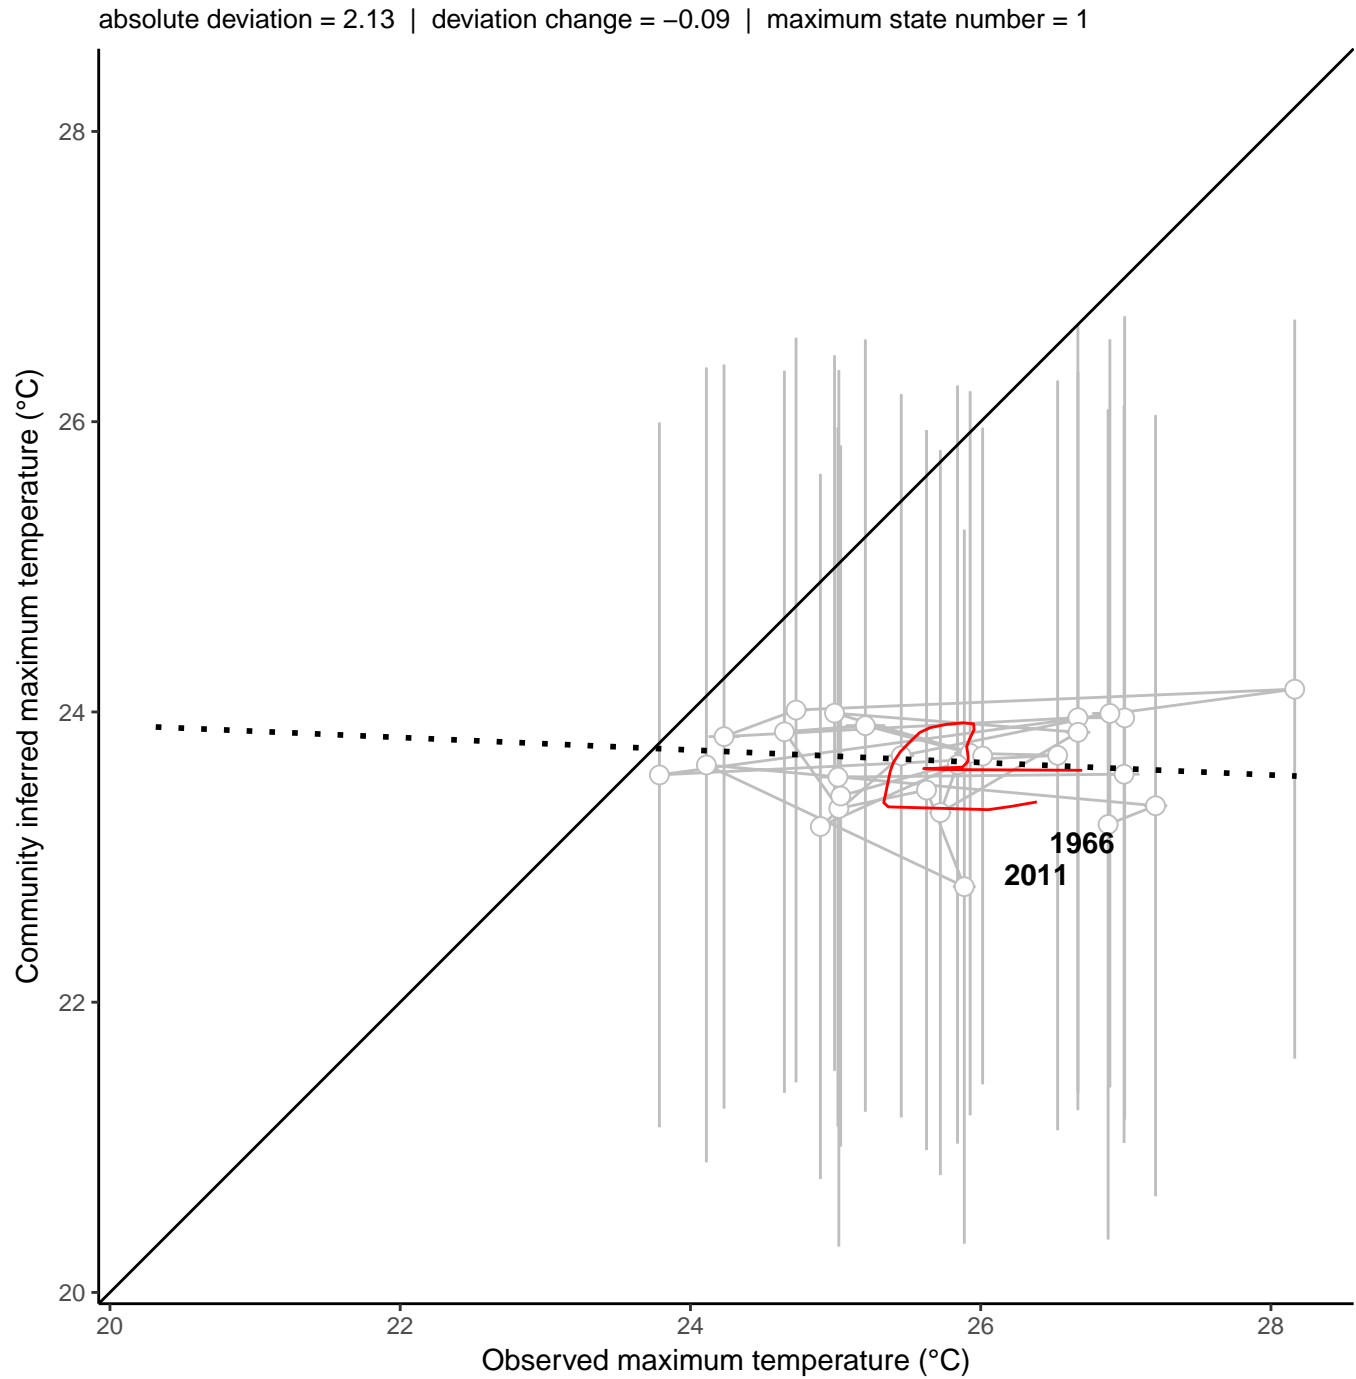

site : 840\_82\_23

absolute deviation = 3.05 | deviation change = 1.71 | maximum state number = 1

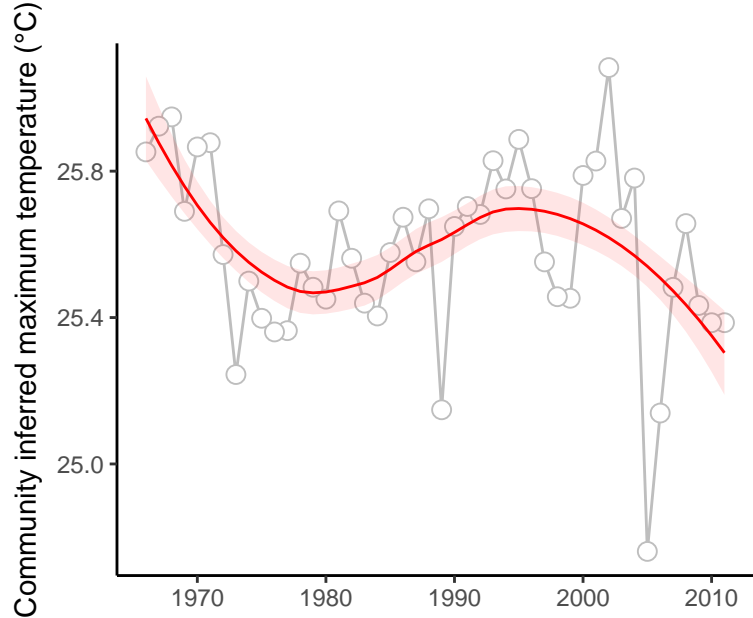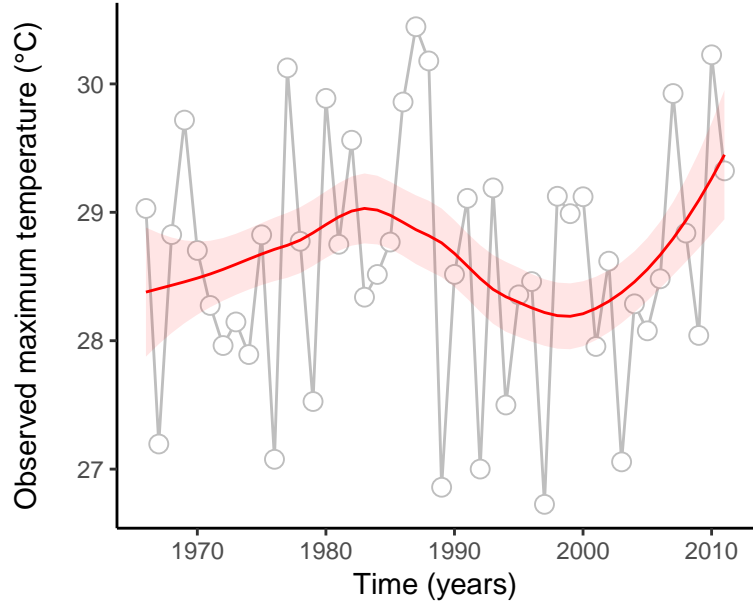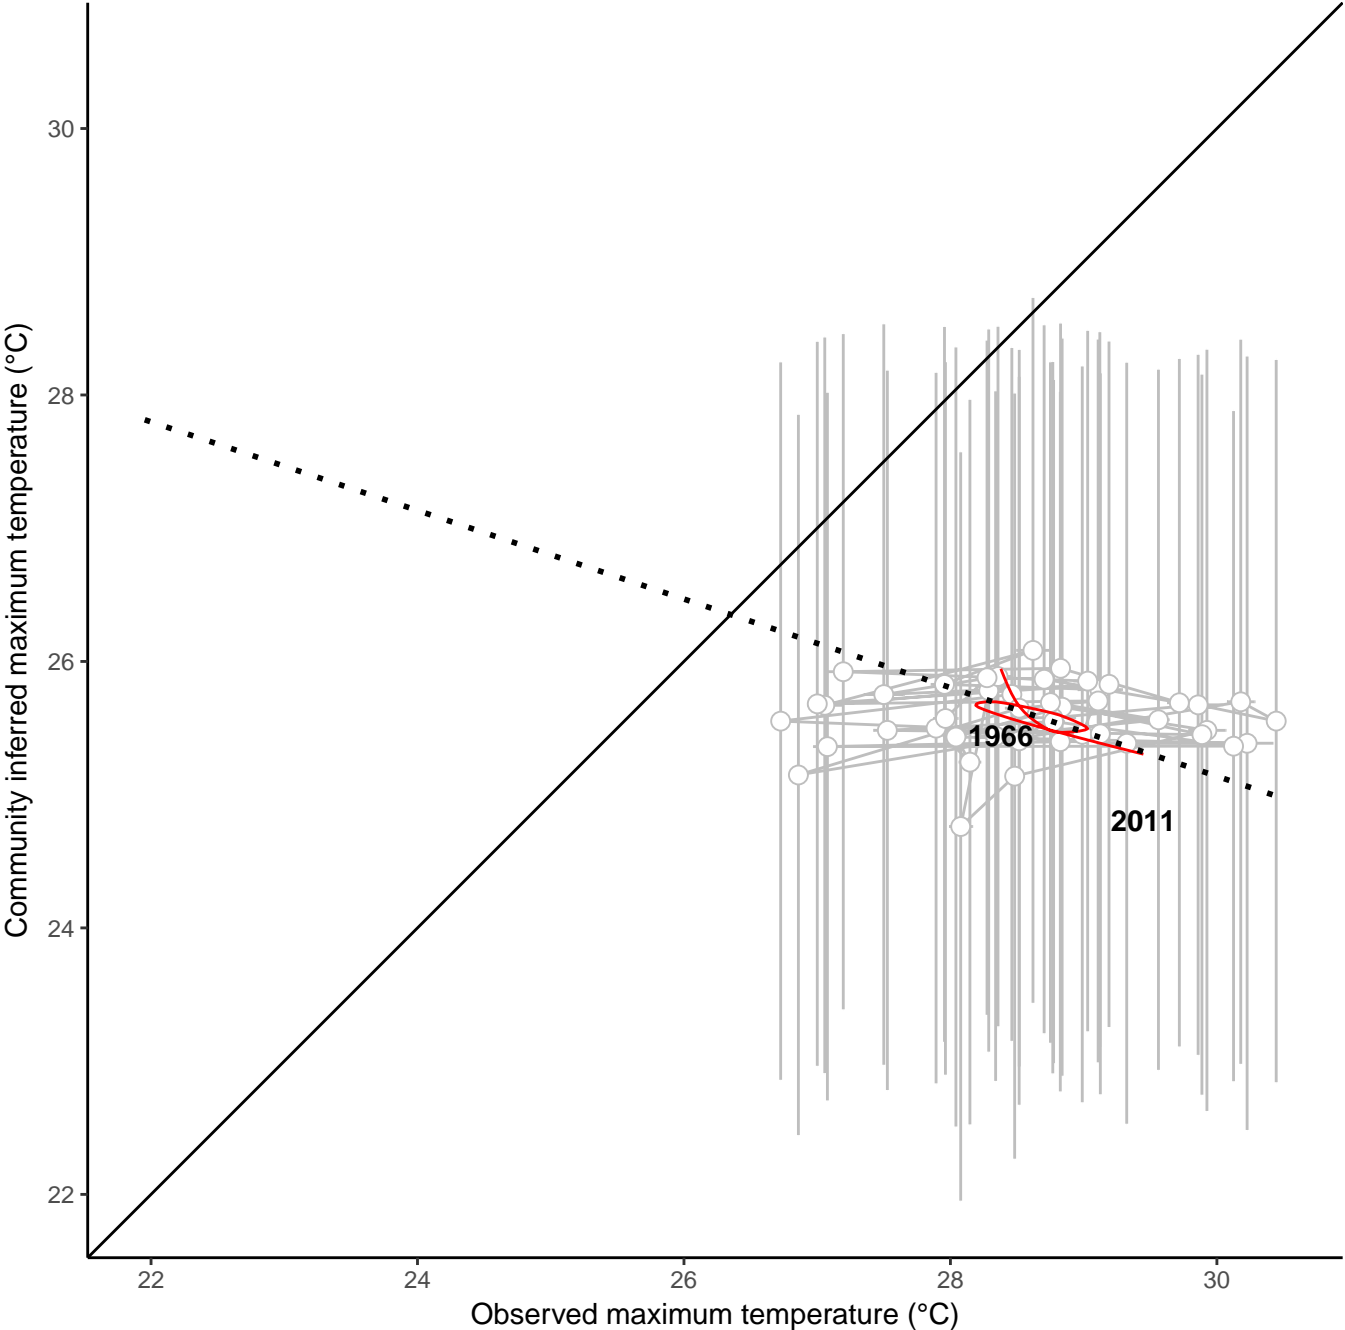

site : 840\_83\_45

absolute deviation = 5.09 | deviation change = 0.67 | maximum state number = 1

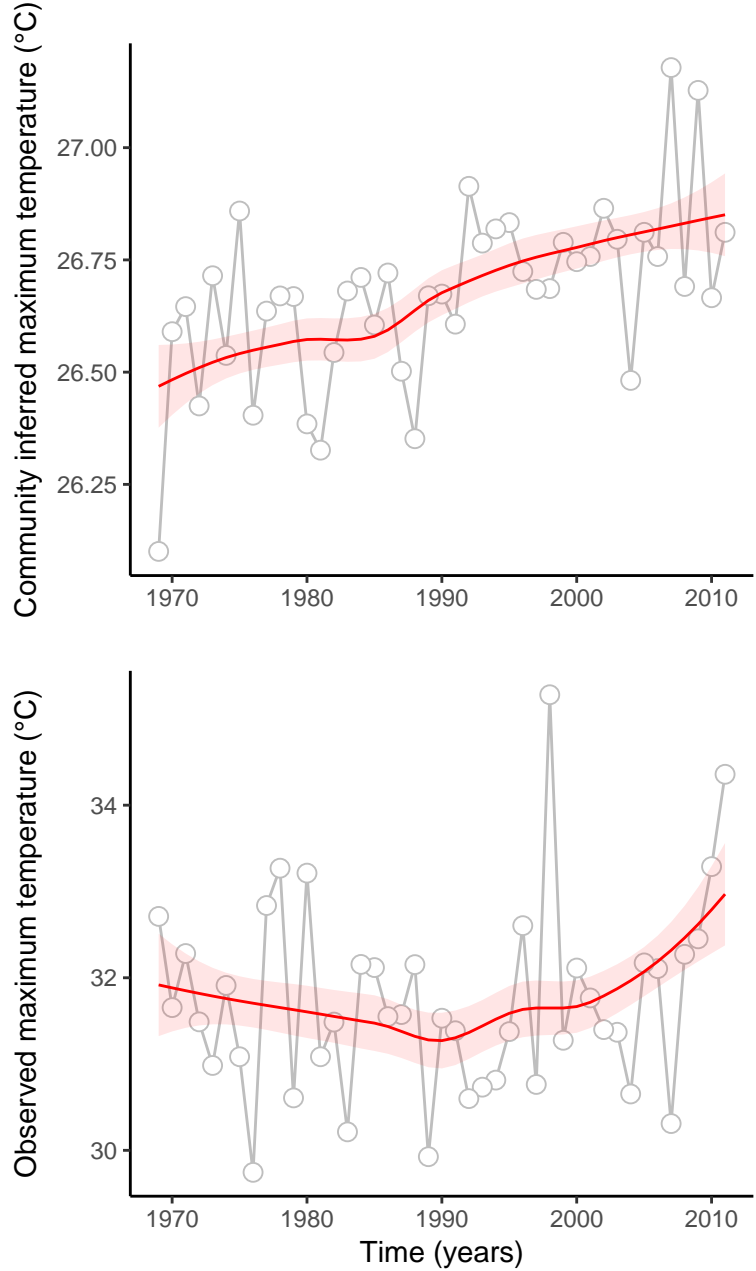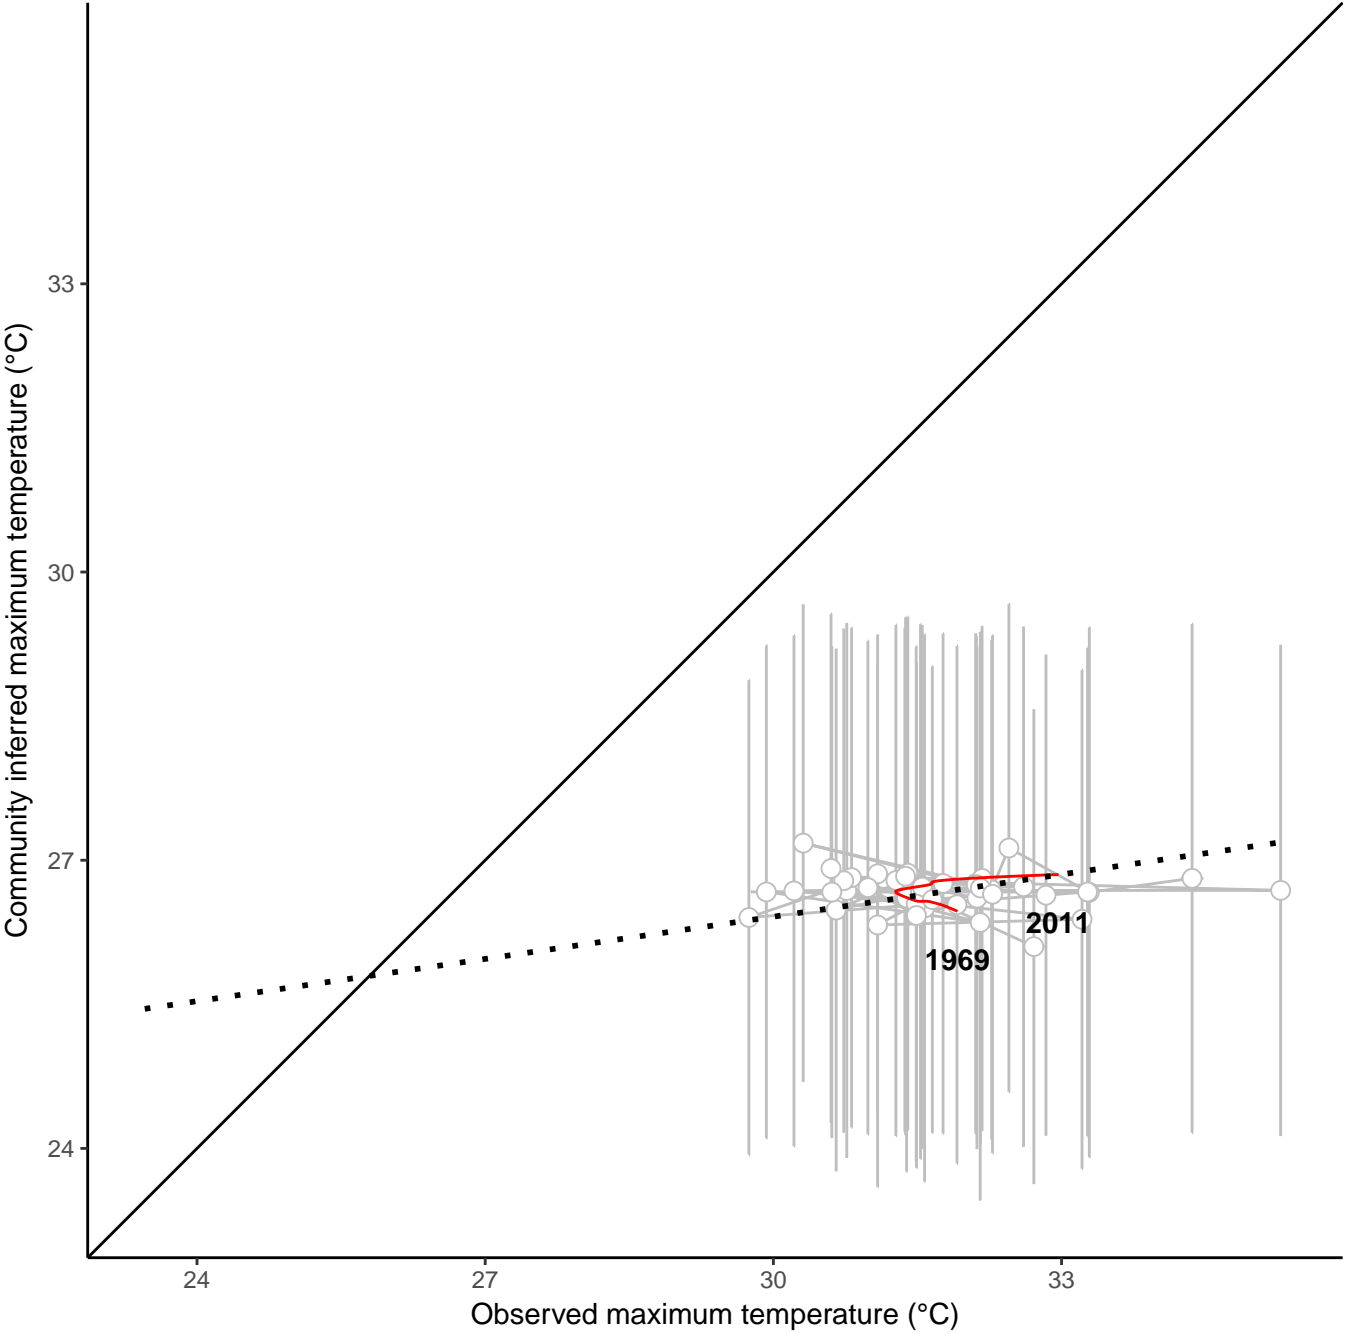

site : 840\_90\_23

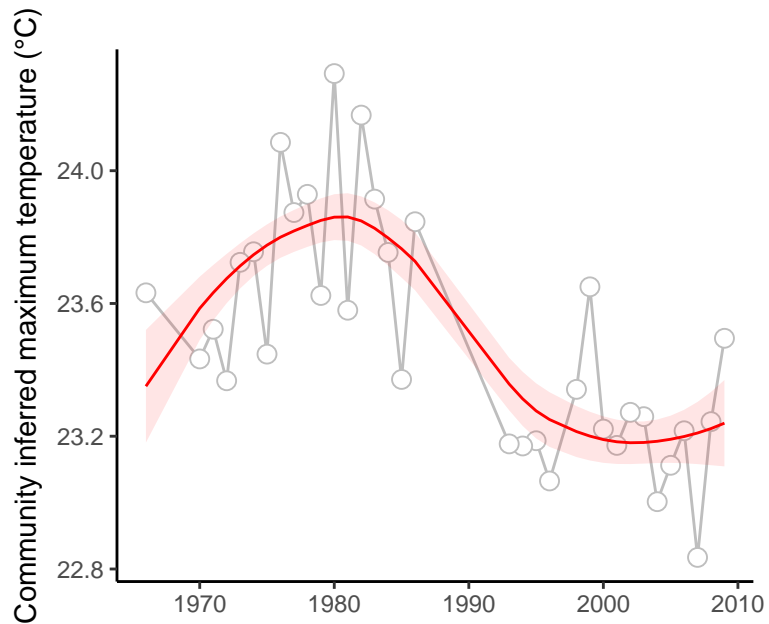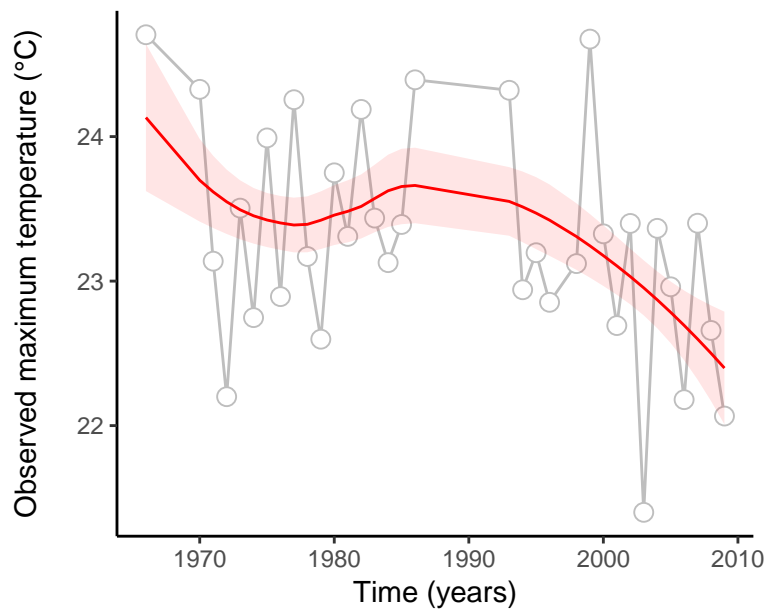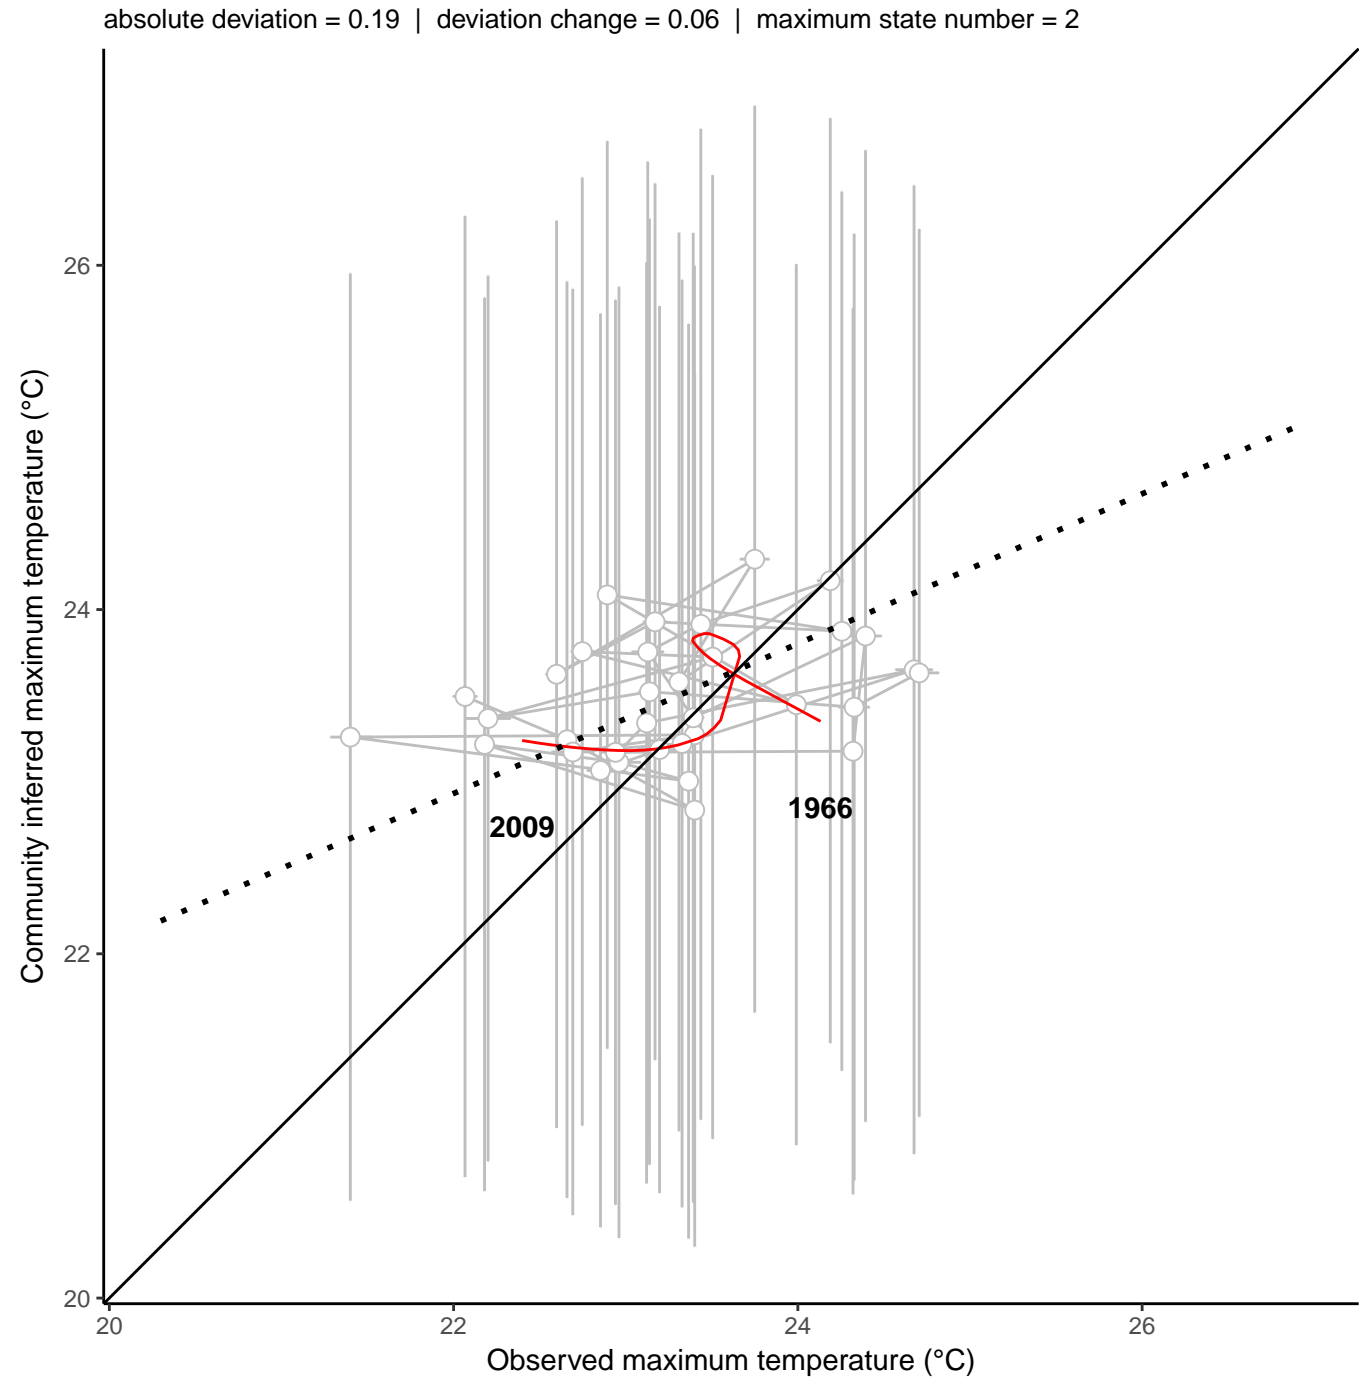

site : 840\_91\_27

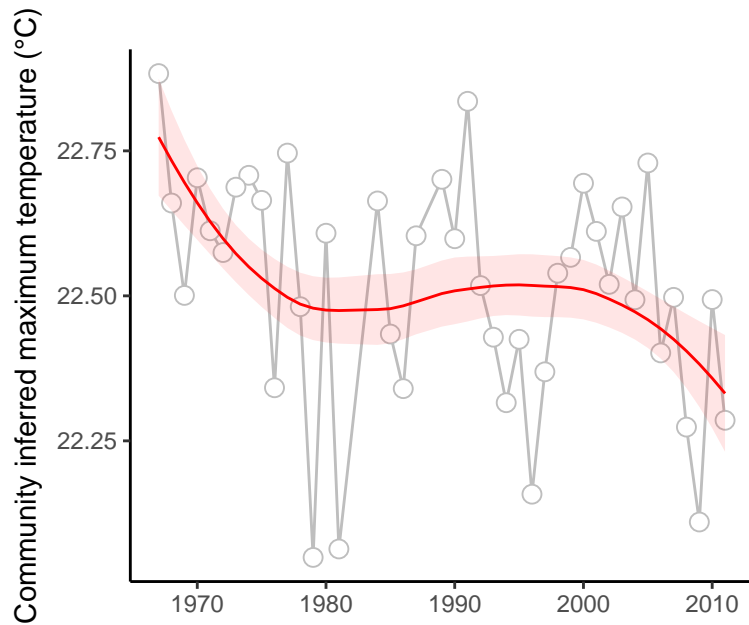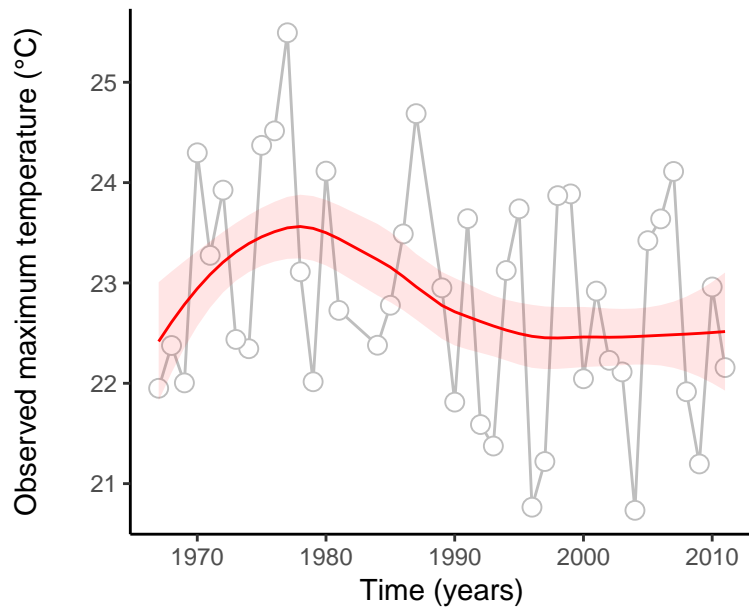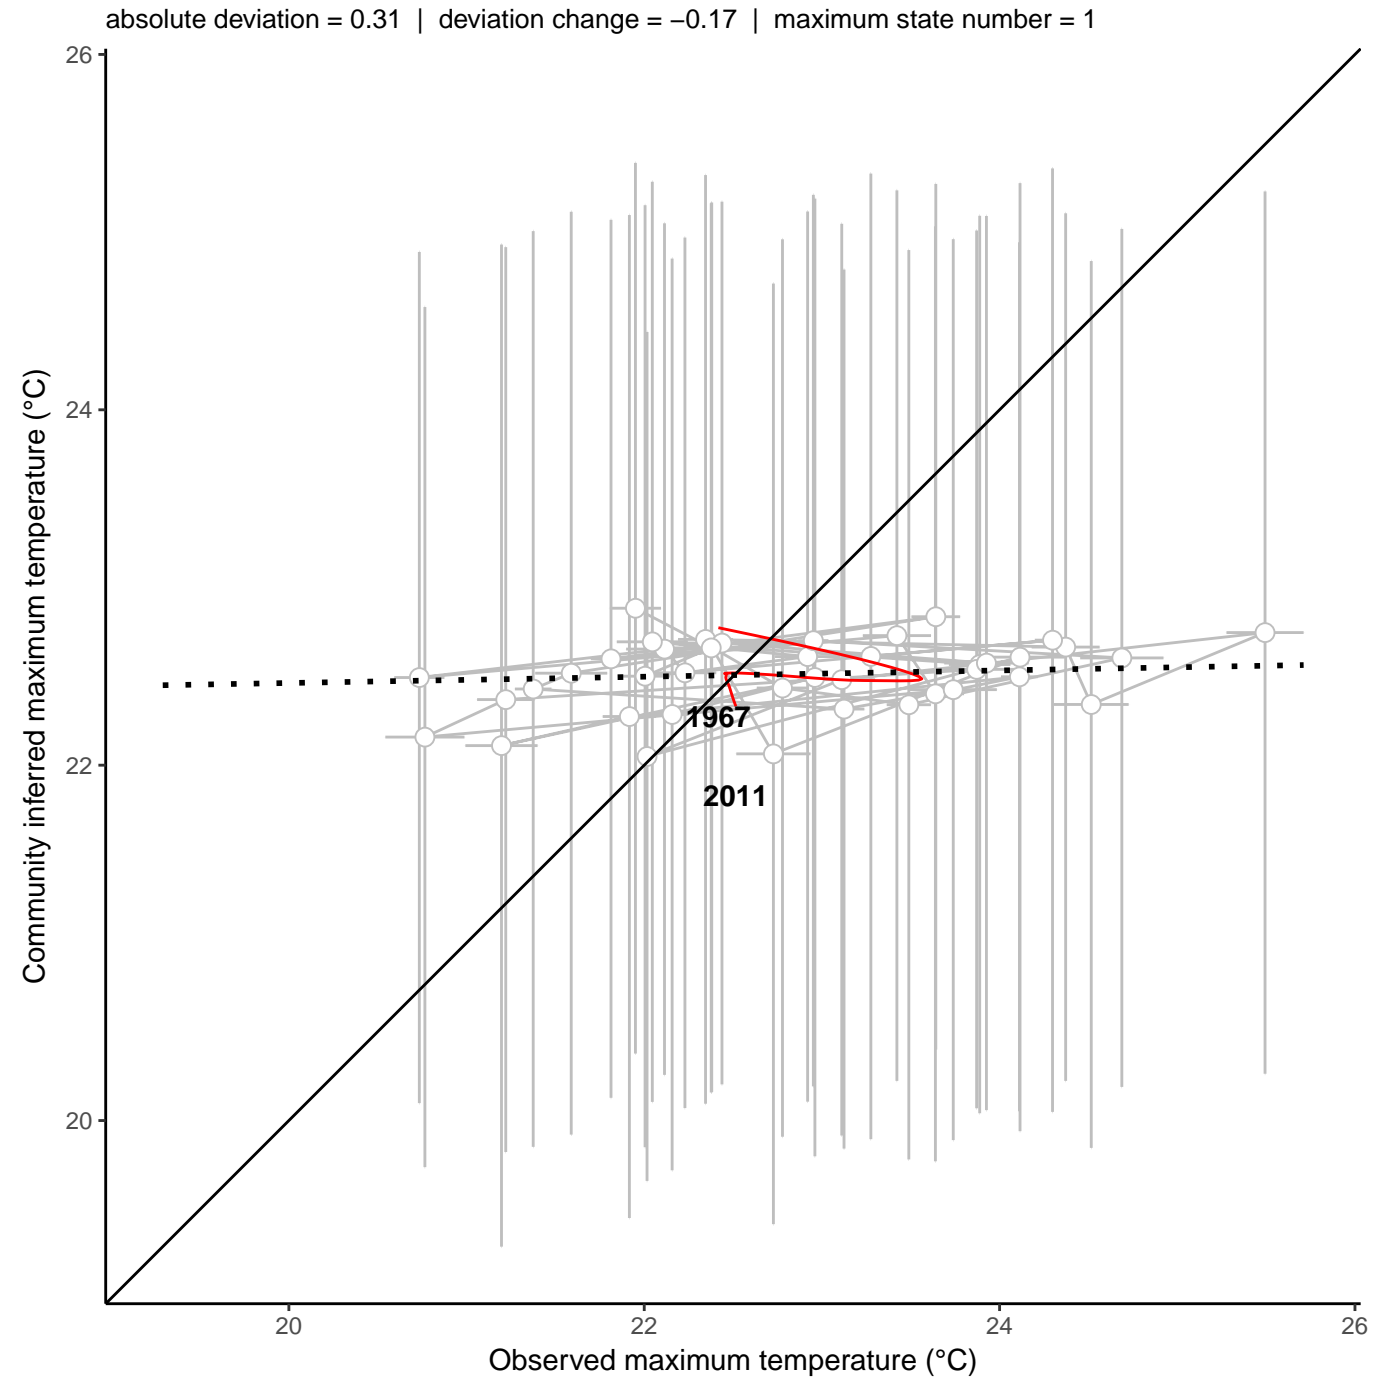

site : 840\_91\_40

absolute deviation = 1.66 | deviation change = 0.08 | maximum state number = 1

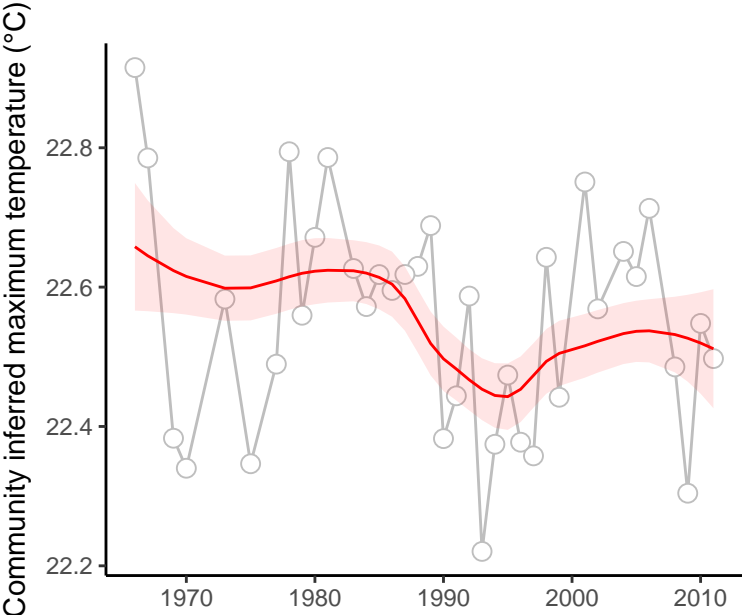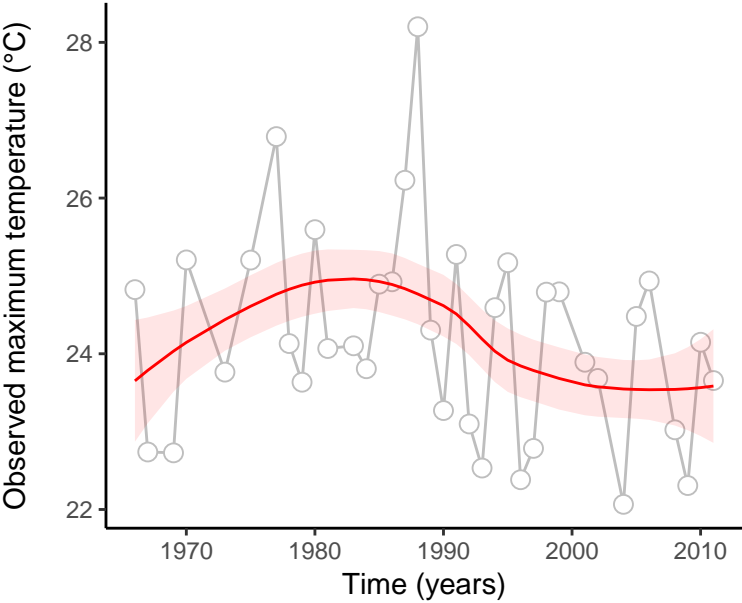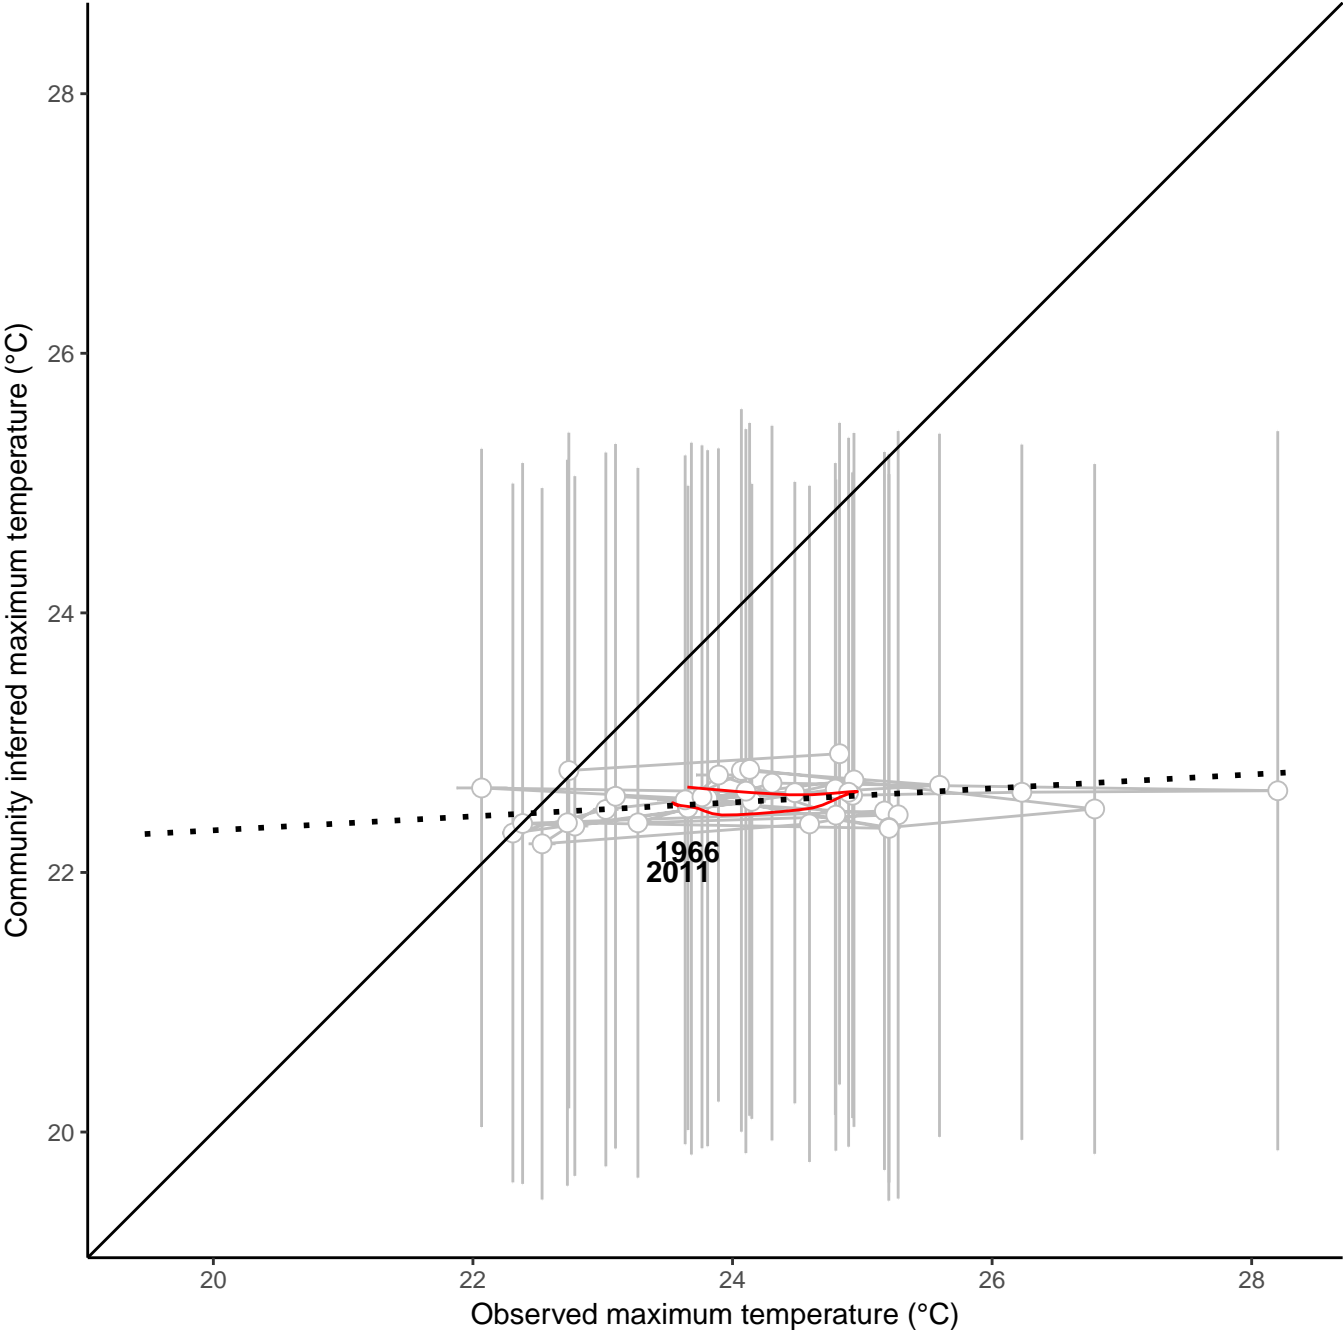

site : 840\_91\_9

absolute deviation = 1.46 | deviation change = 0.79 | maximum state number = 1

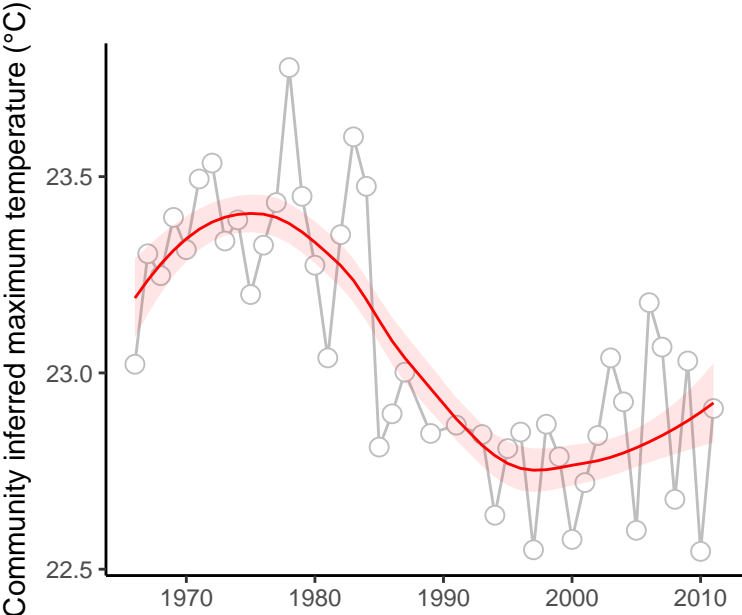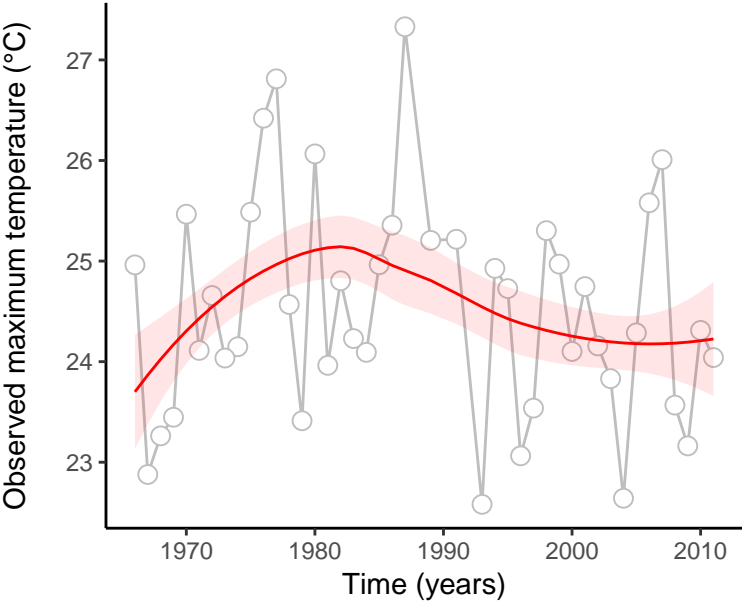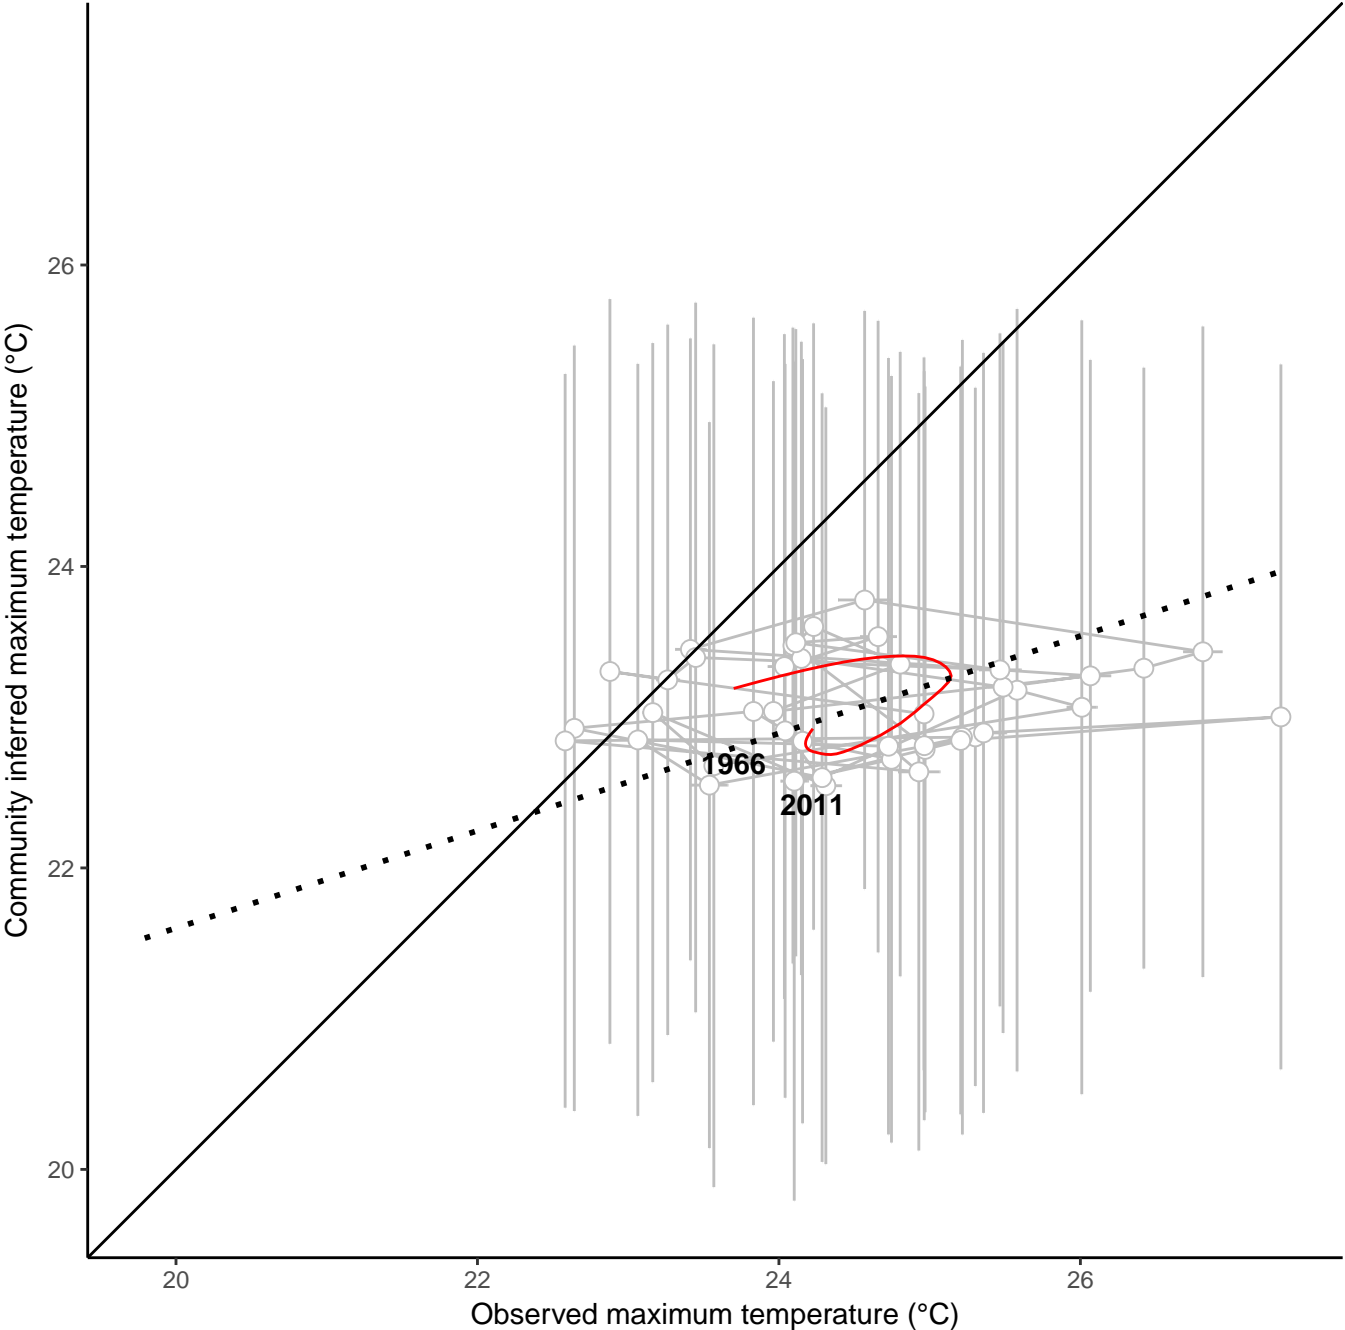



site : 840\_14\_194

absolute deviation = 1.91 | deviation change = -1.89 | maximum state number = 1

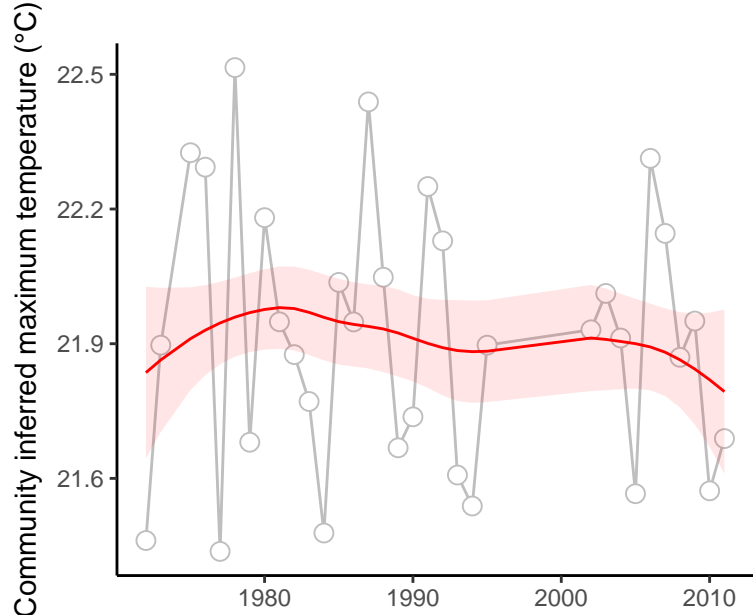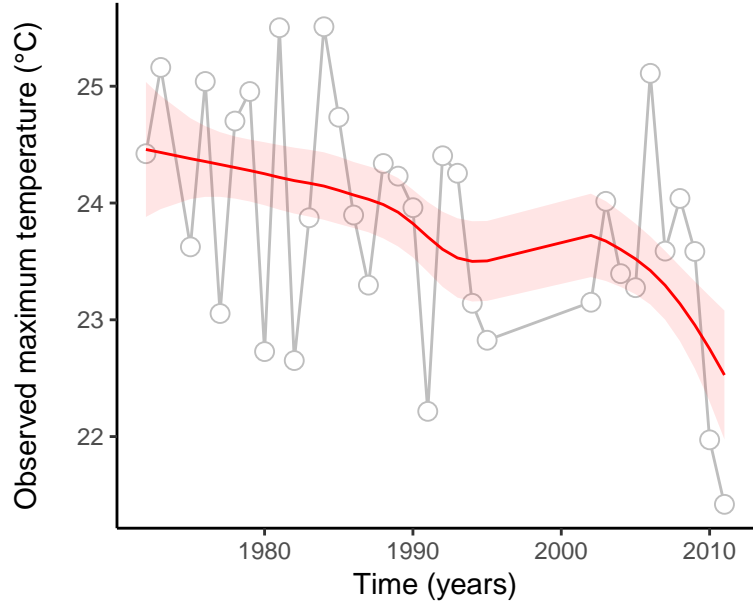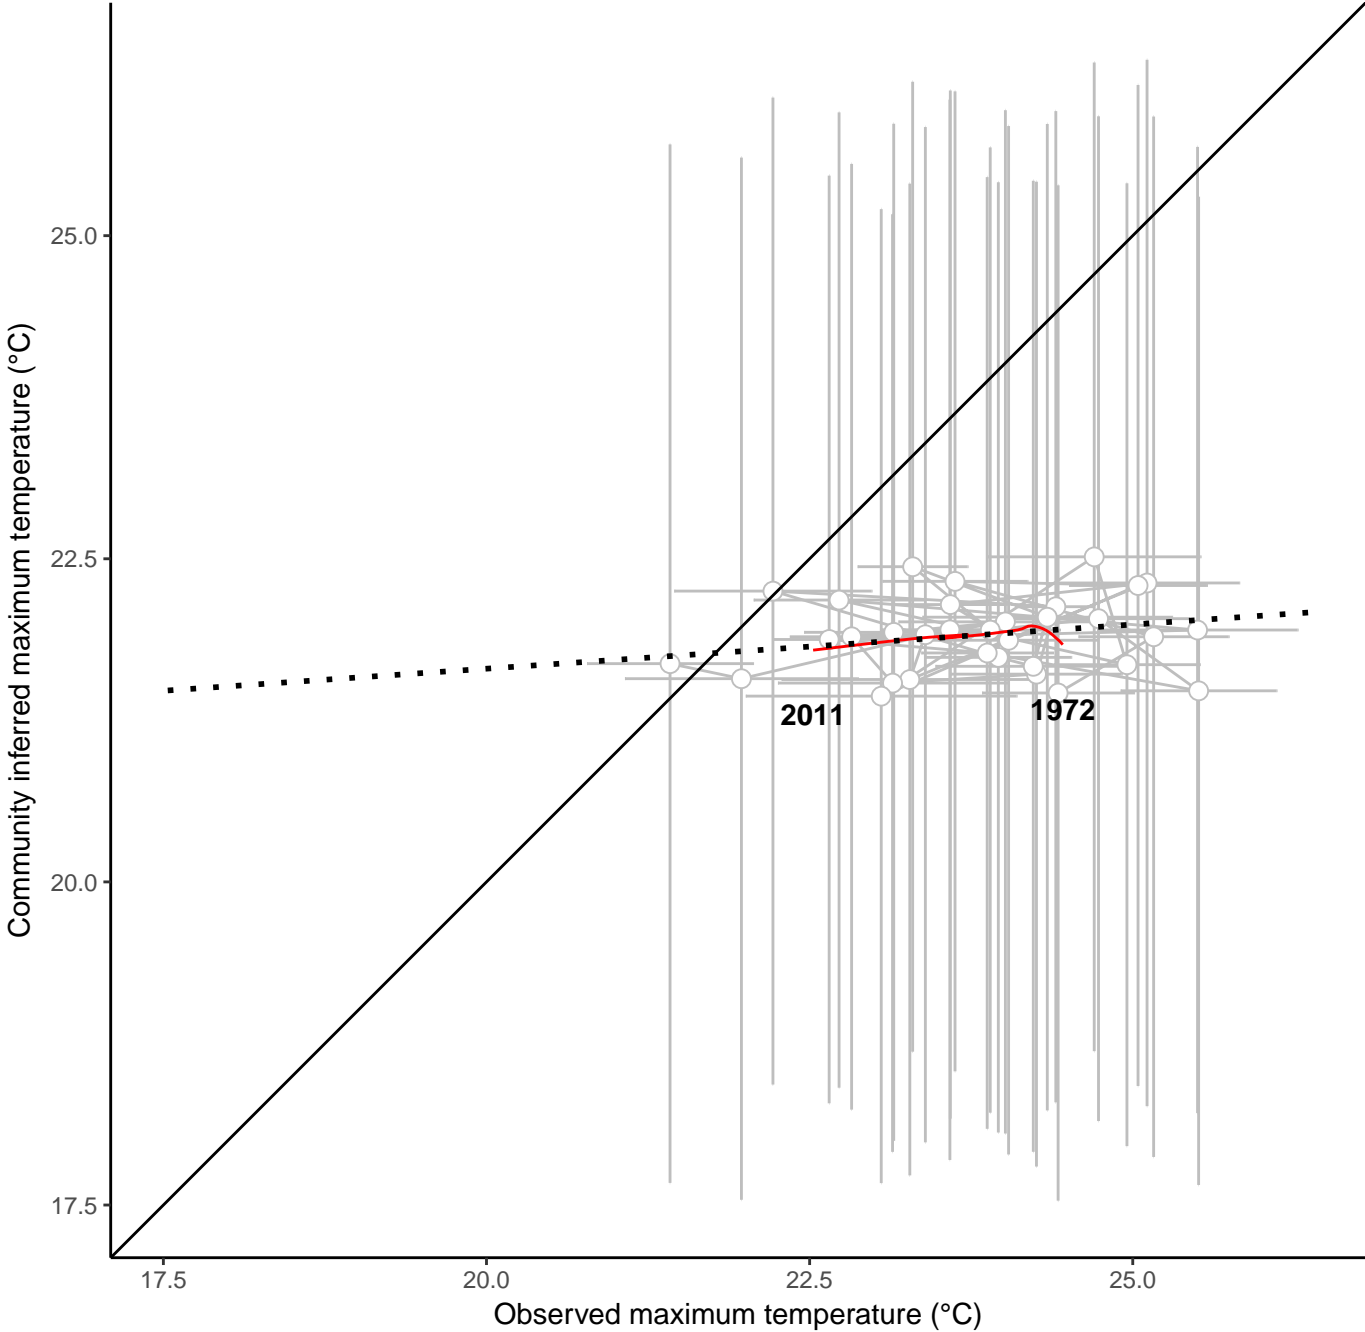

site : 840\_18\_8

absolute deviation = 1.39 | deviation change = 0.69 | maximum state number = 1

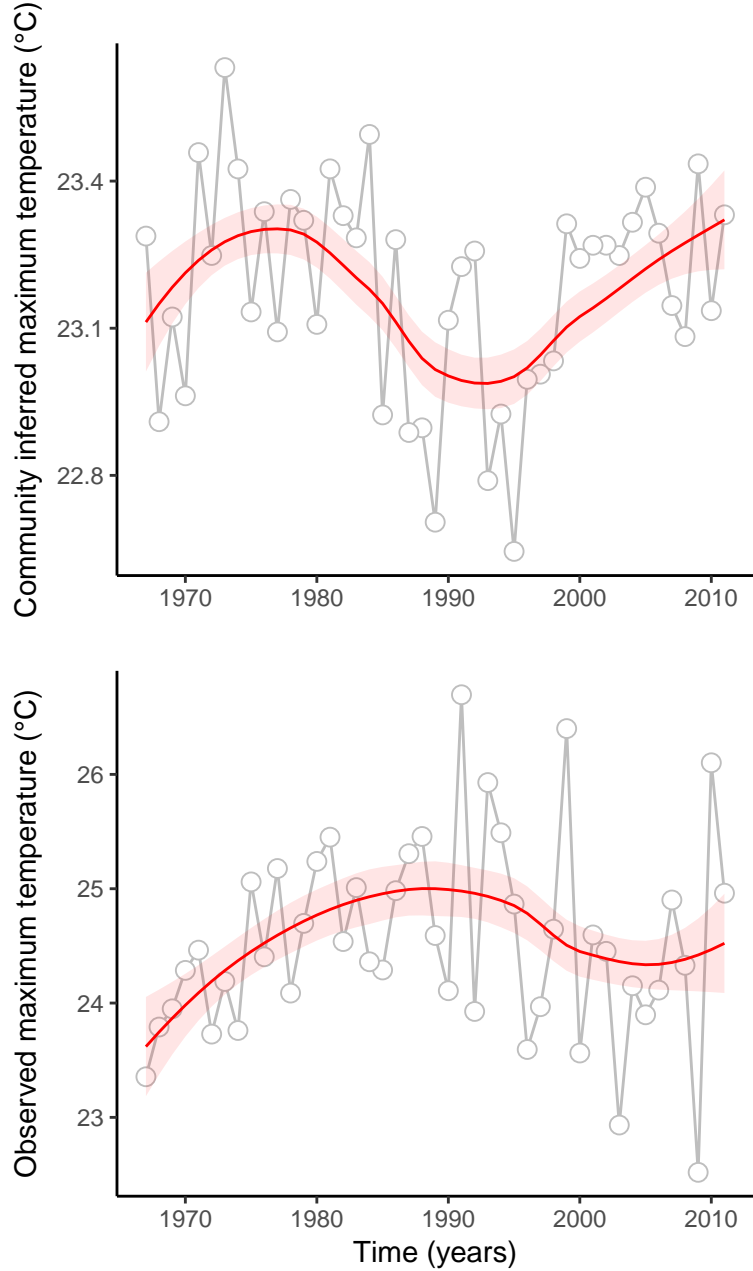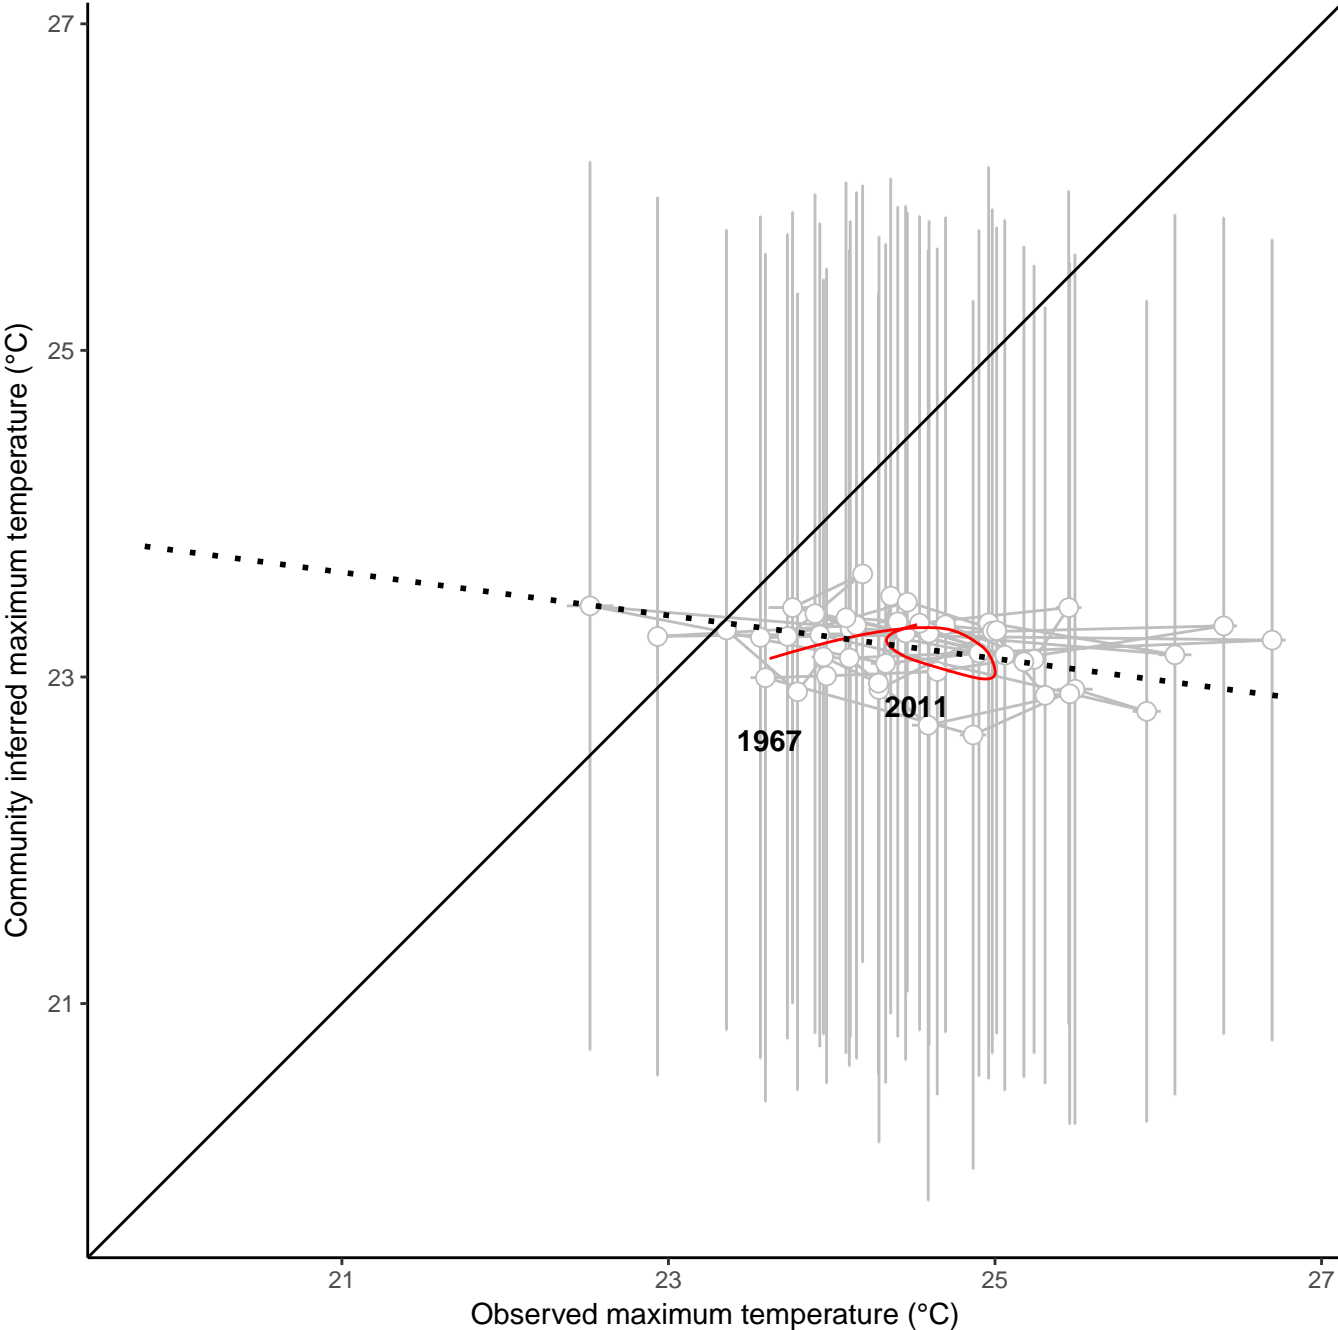

site : 840\_38\_6

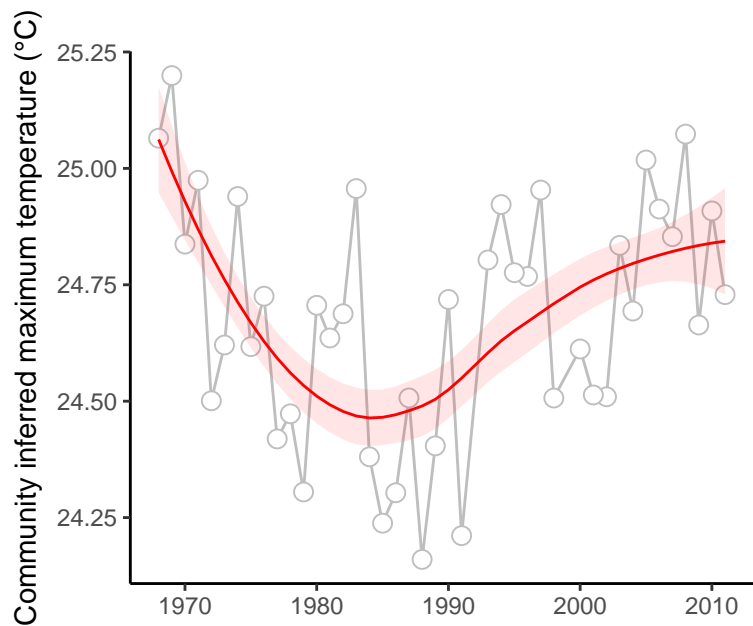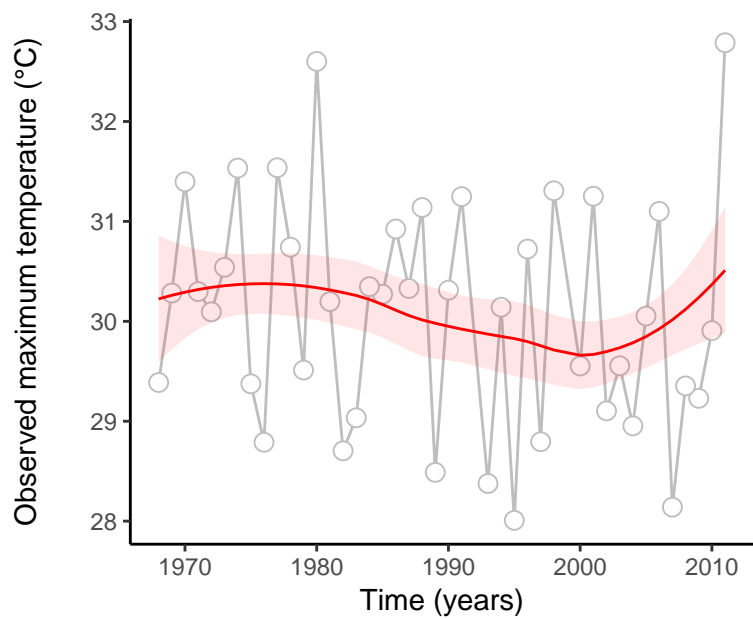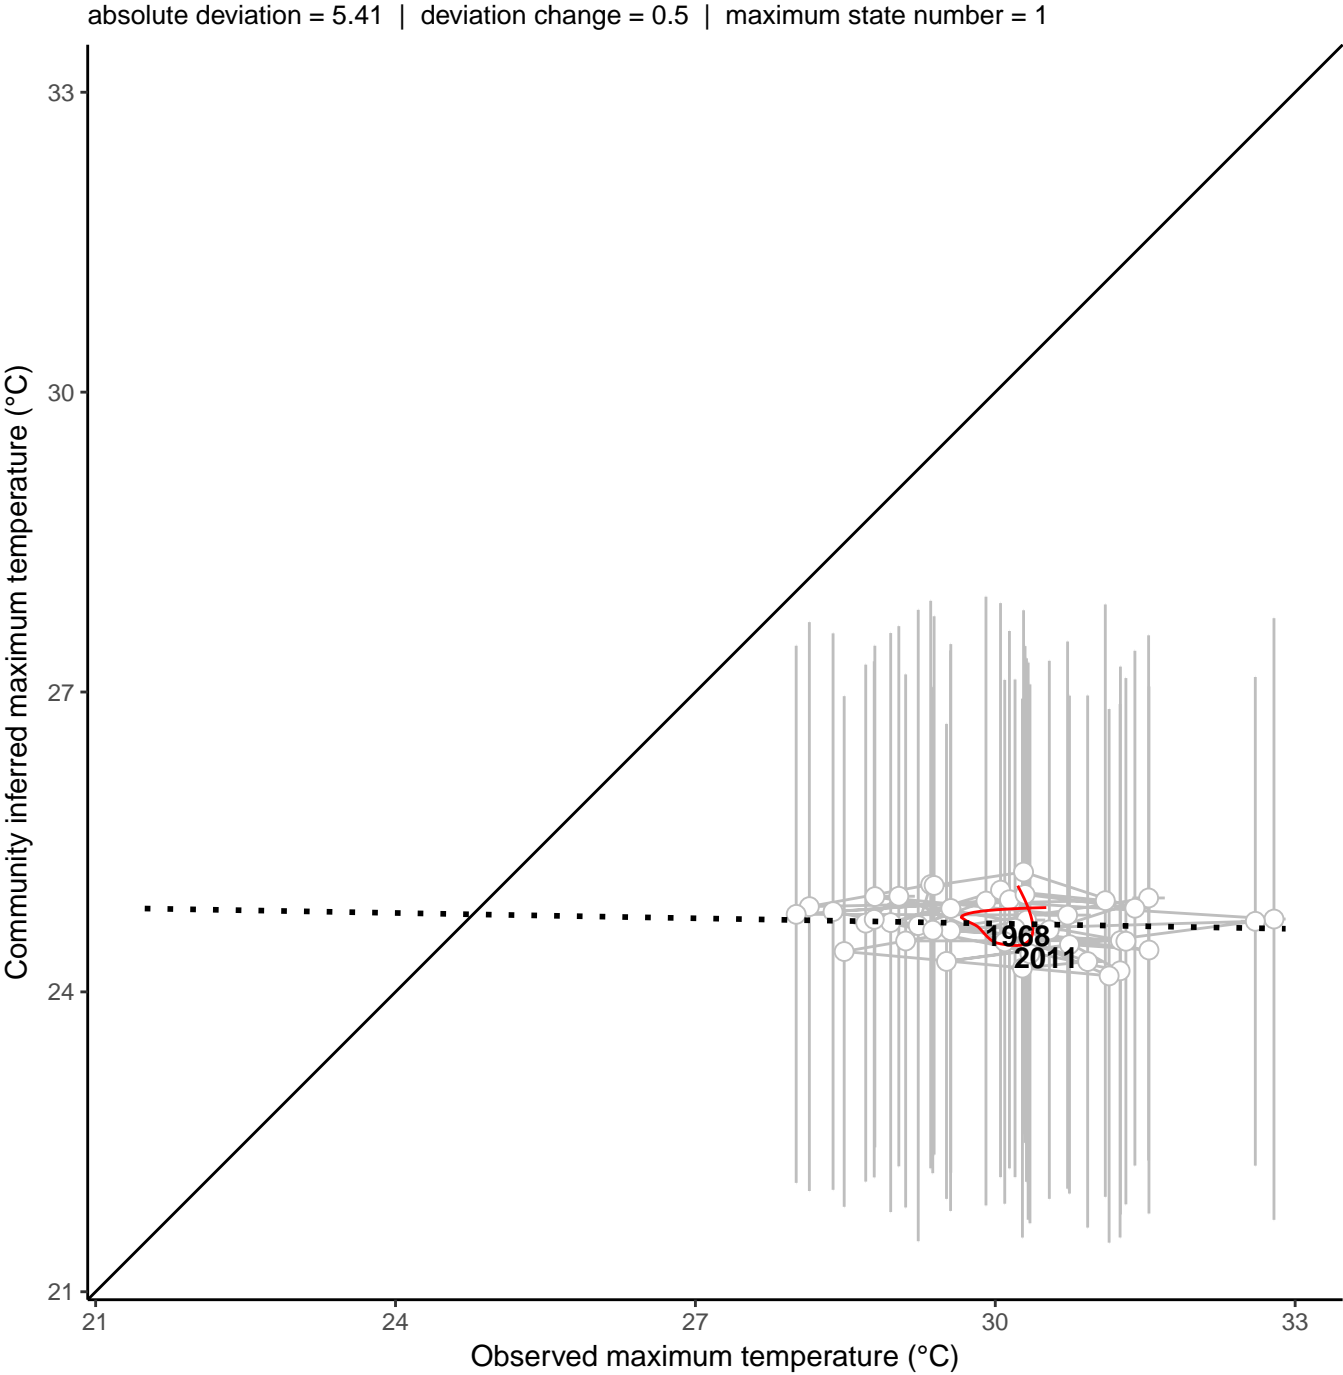

site : 840\_39\_40

absolute deviation = 2.9 | deviation change = 1.78 | maximum state number = 2

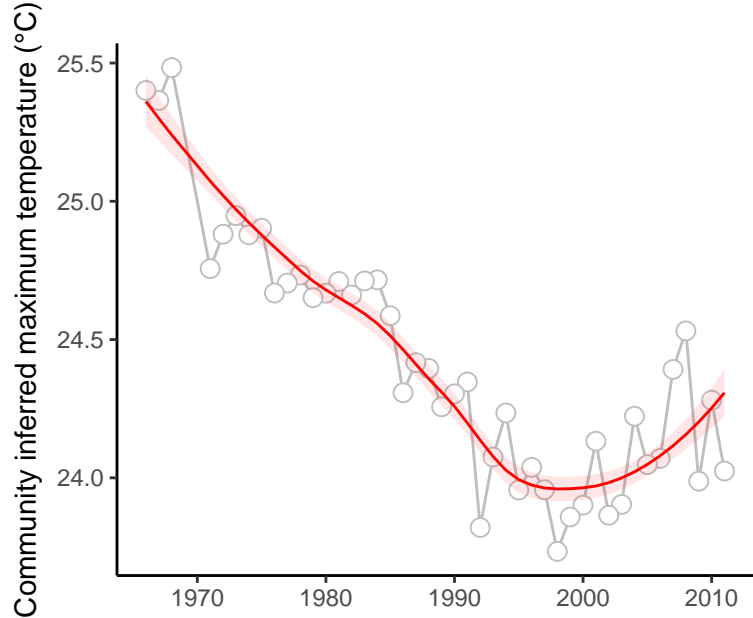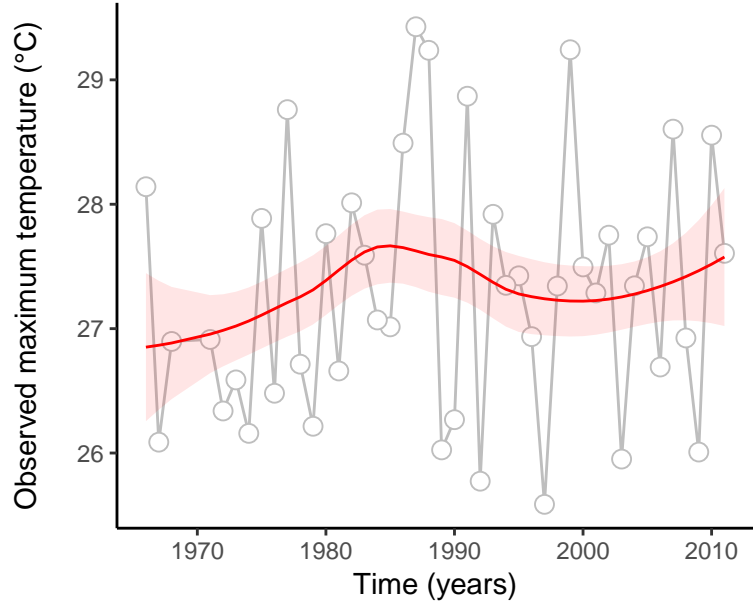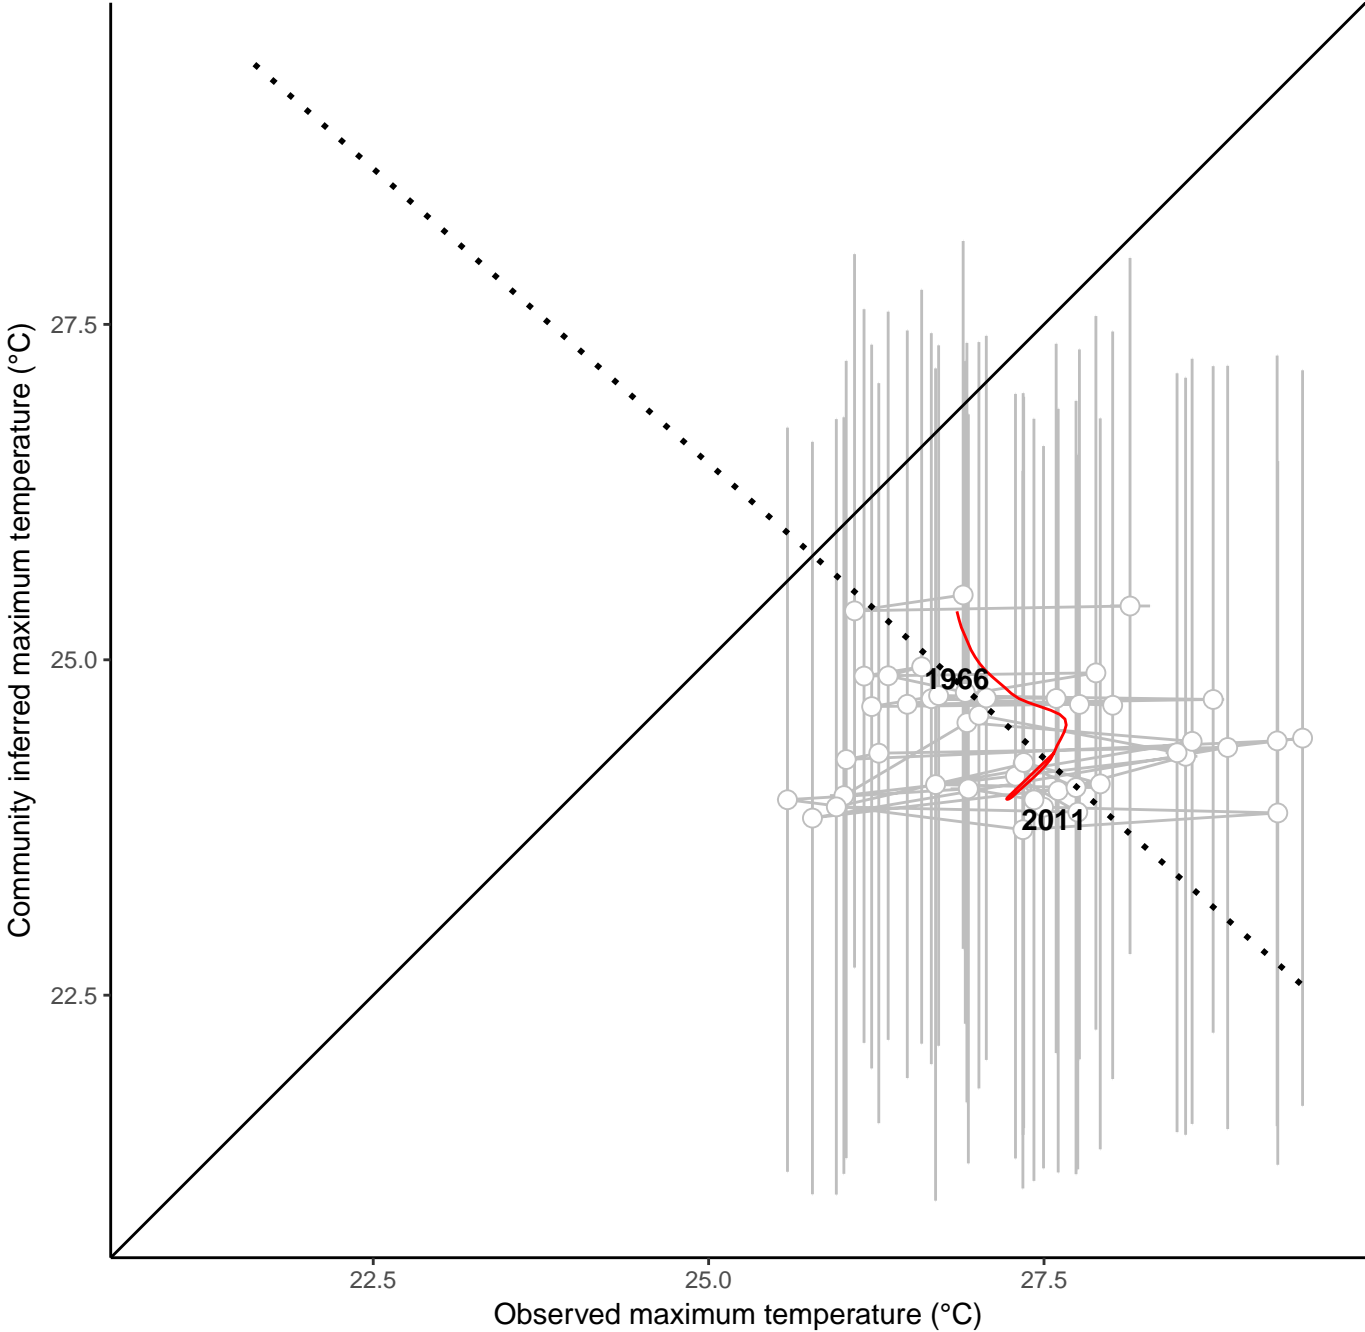

site : 840\_58\_21

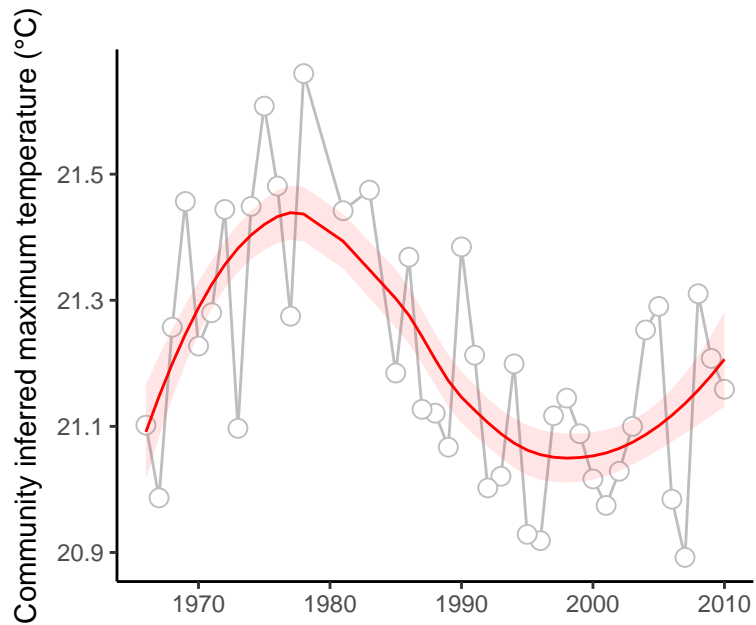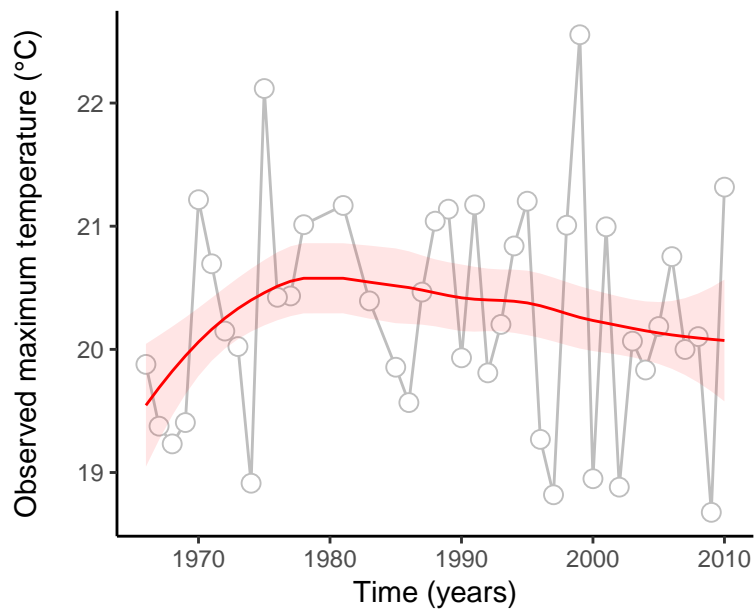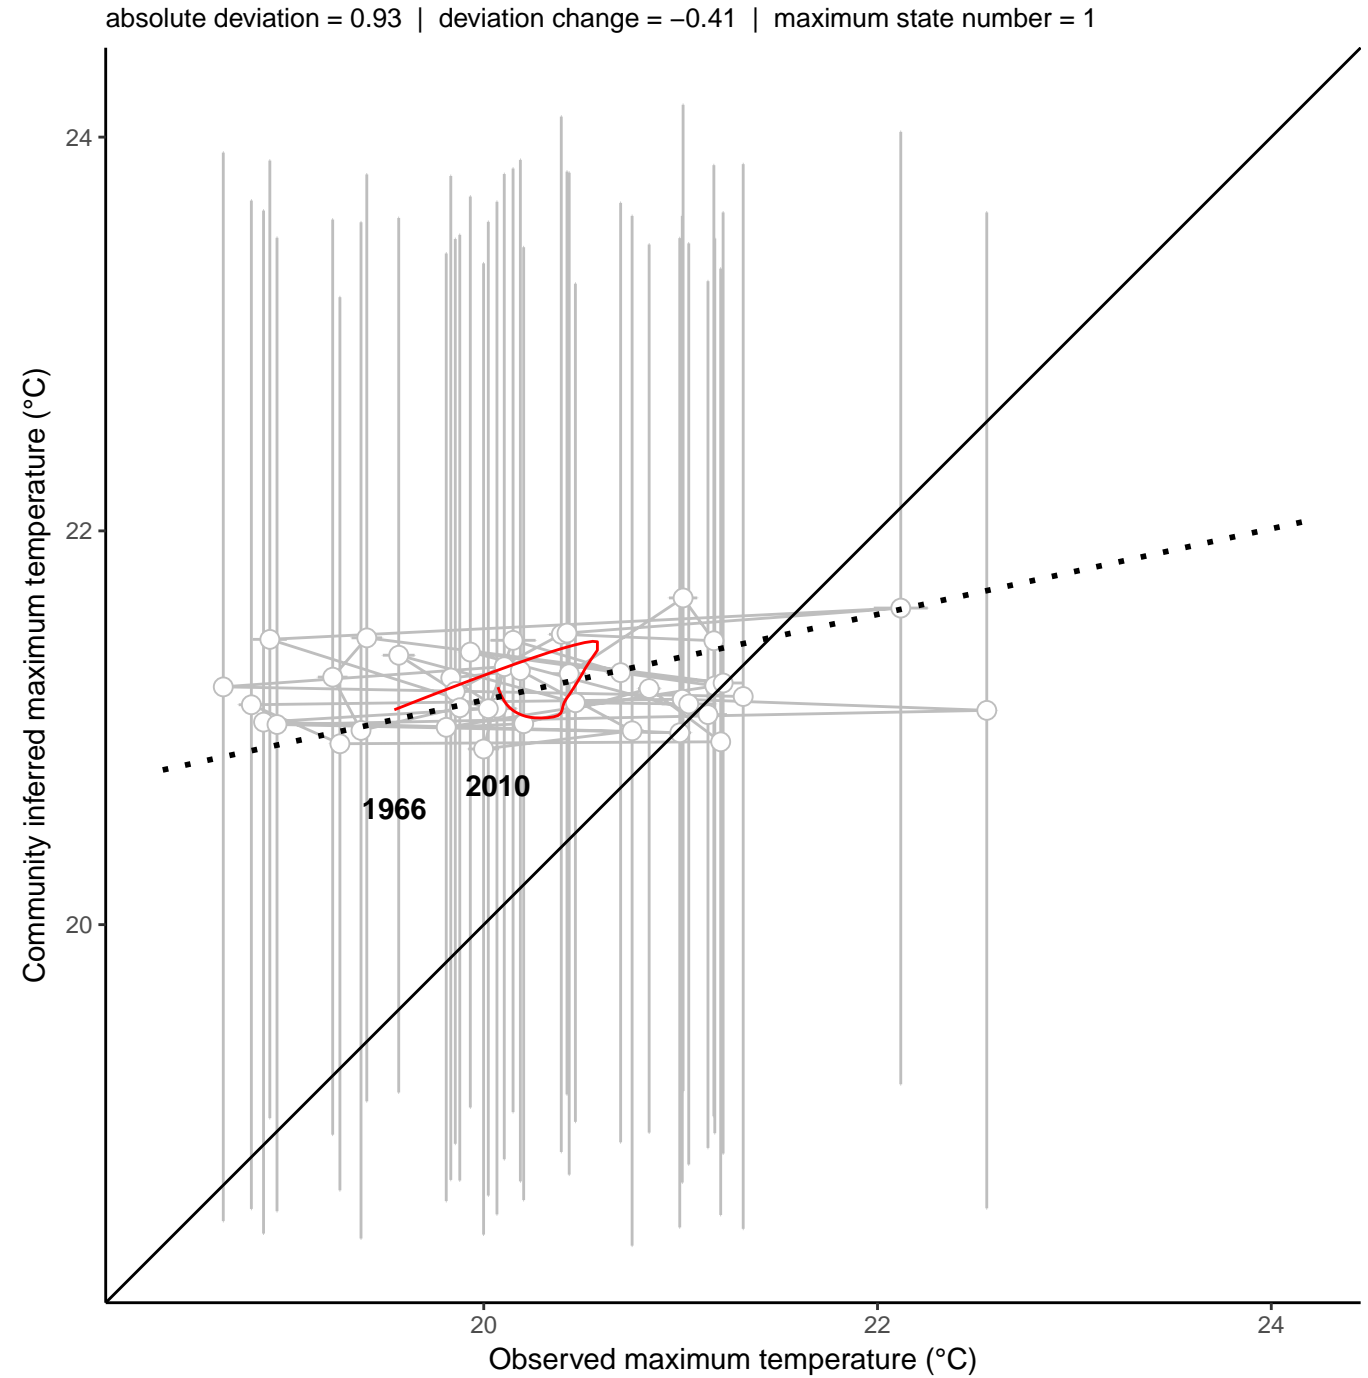

site : 840\_66\_83

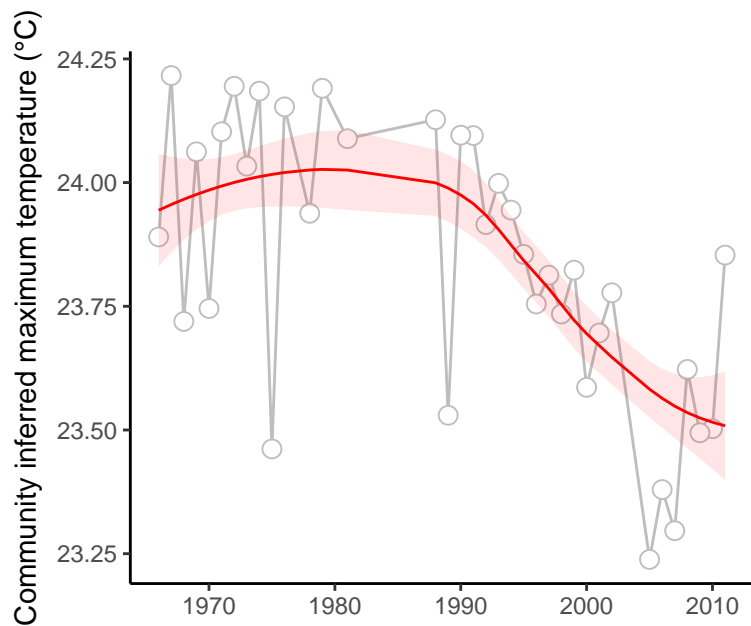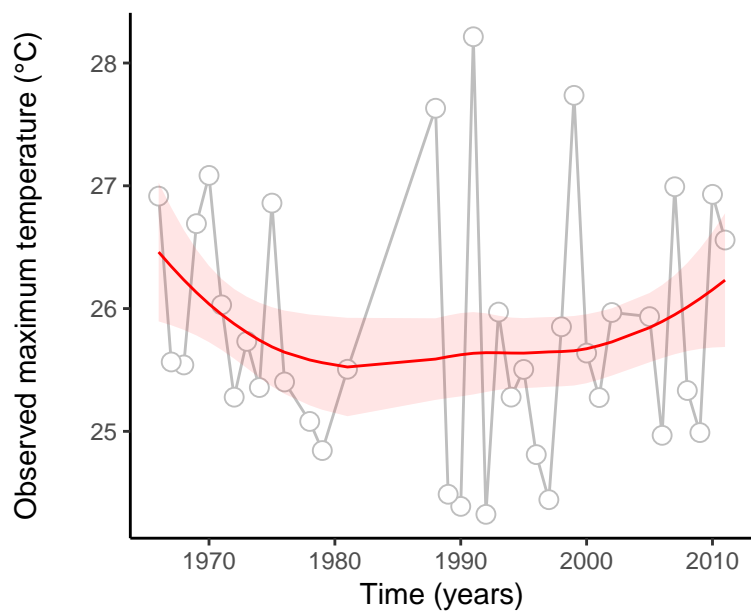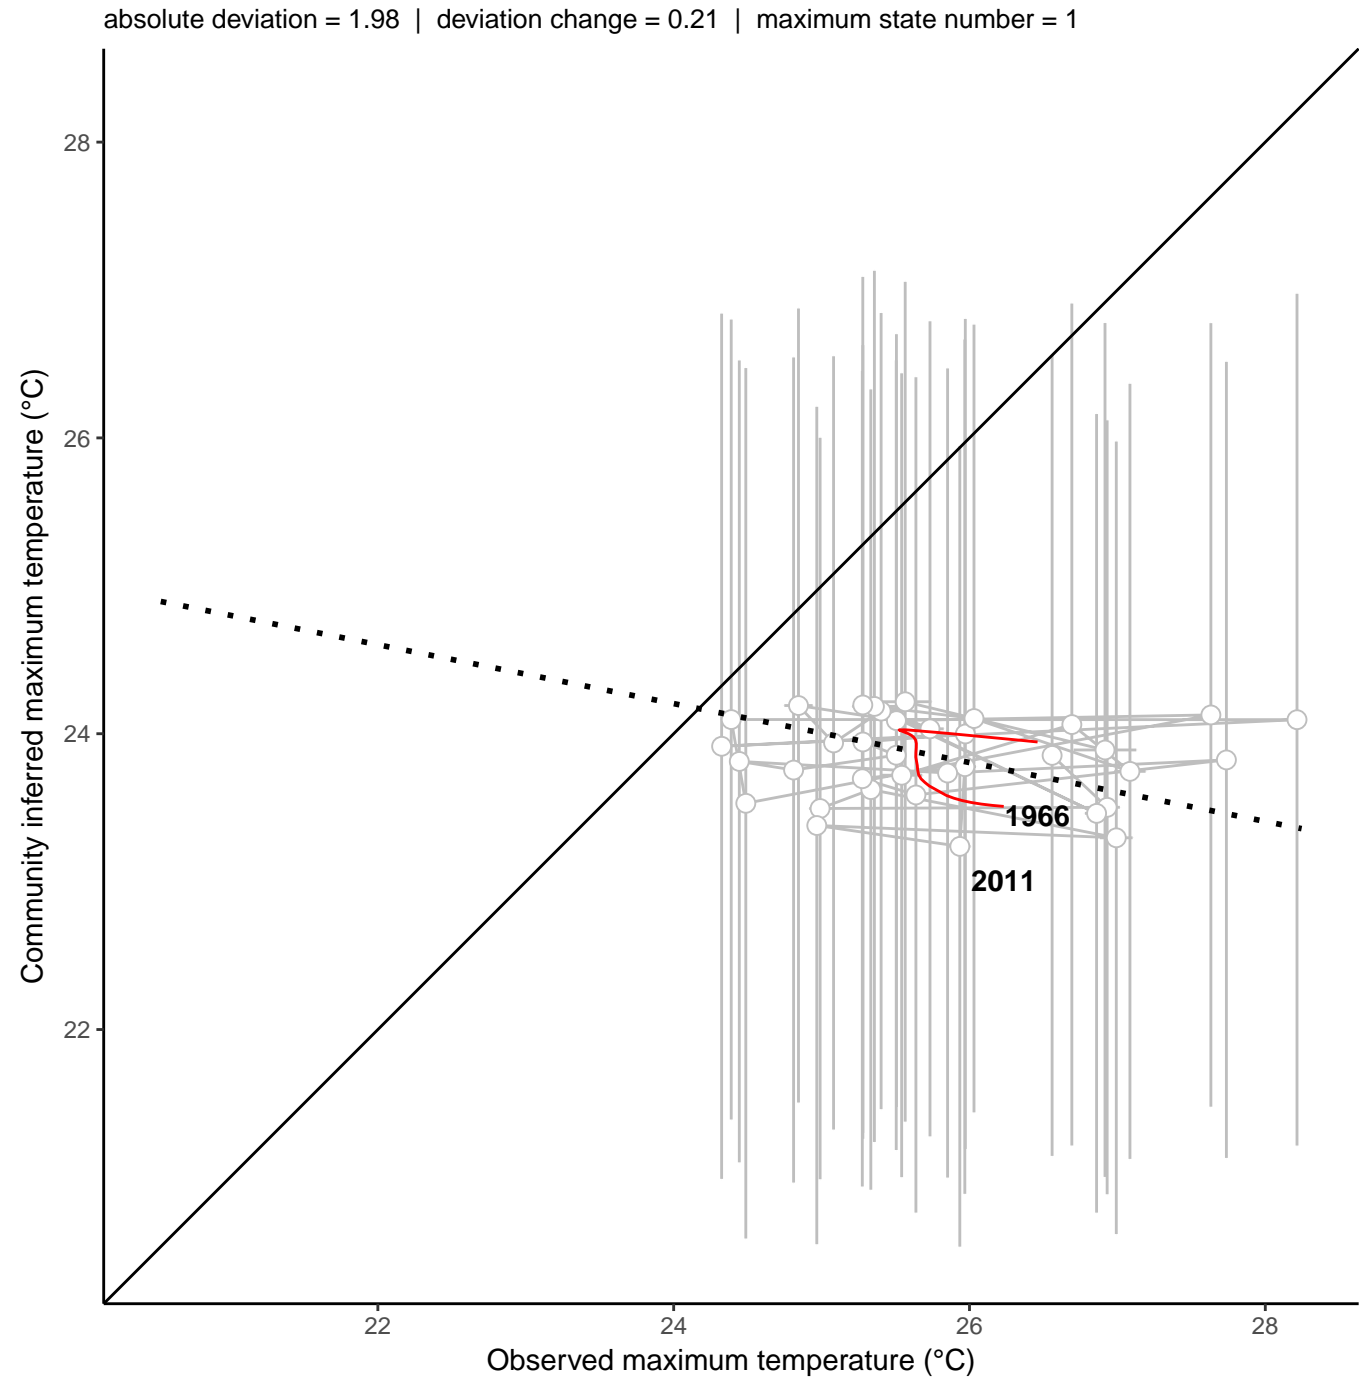

site : 840\_67\_24

absolute deviation = 3.81 | deviation change = 1.49 | maximum state number = 1

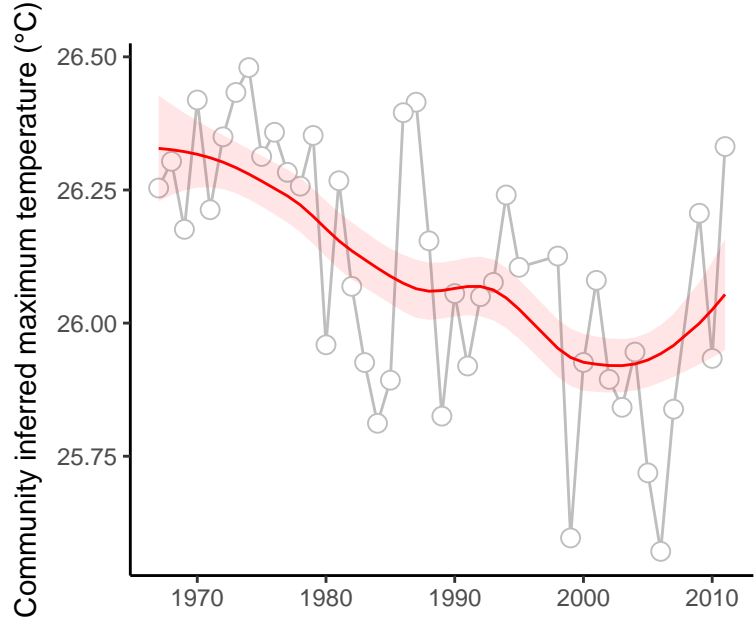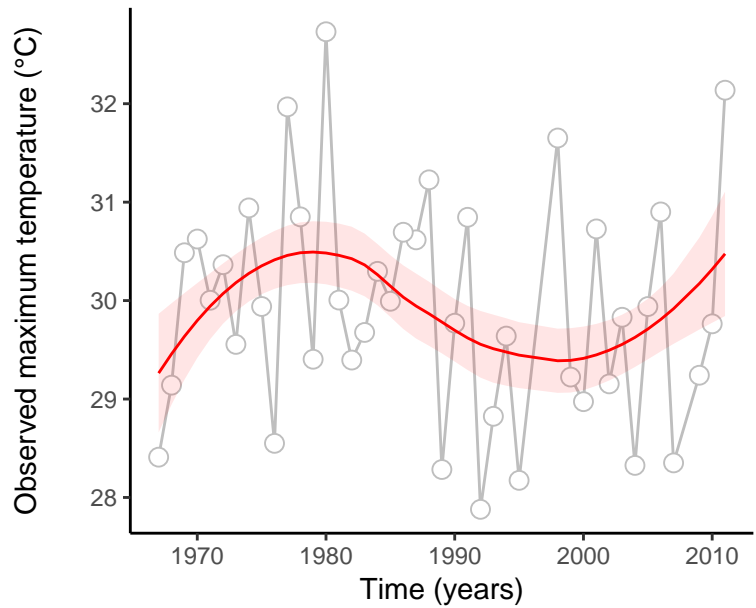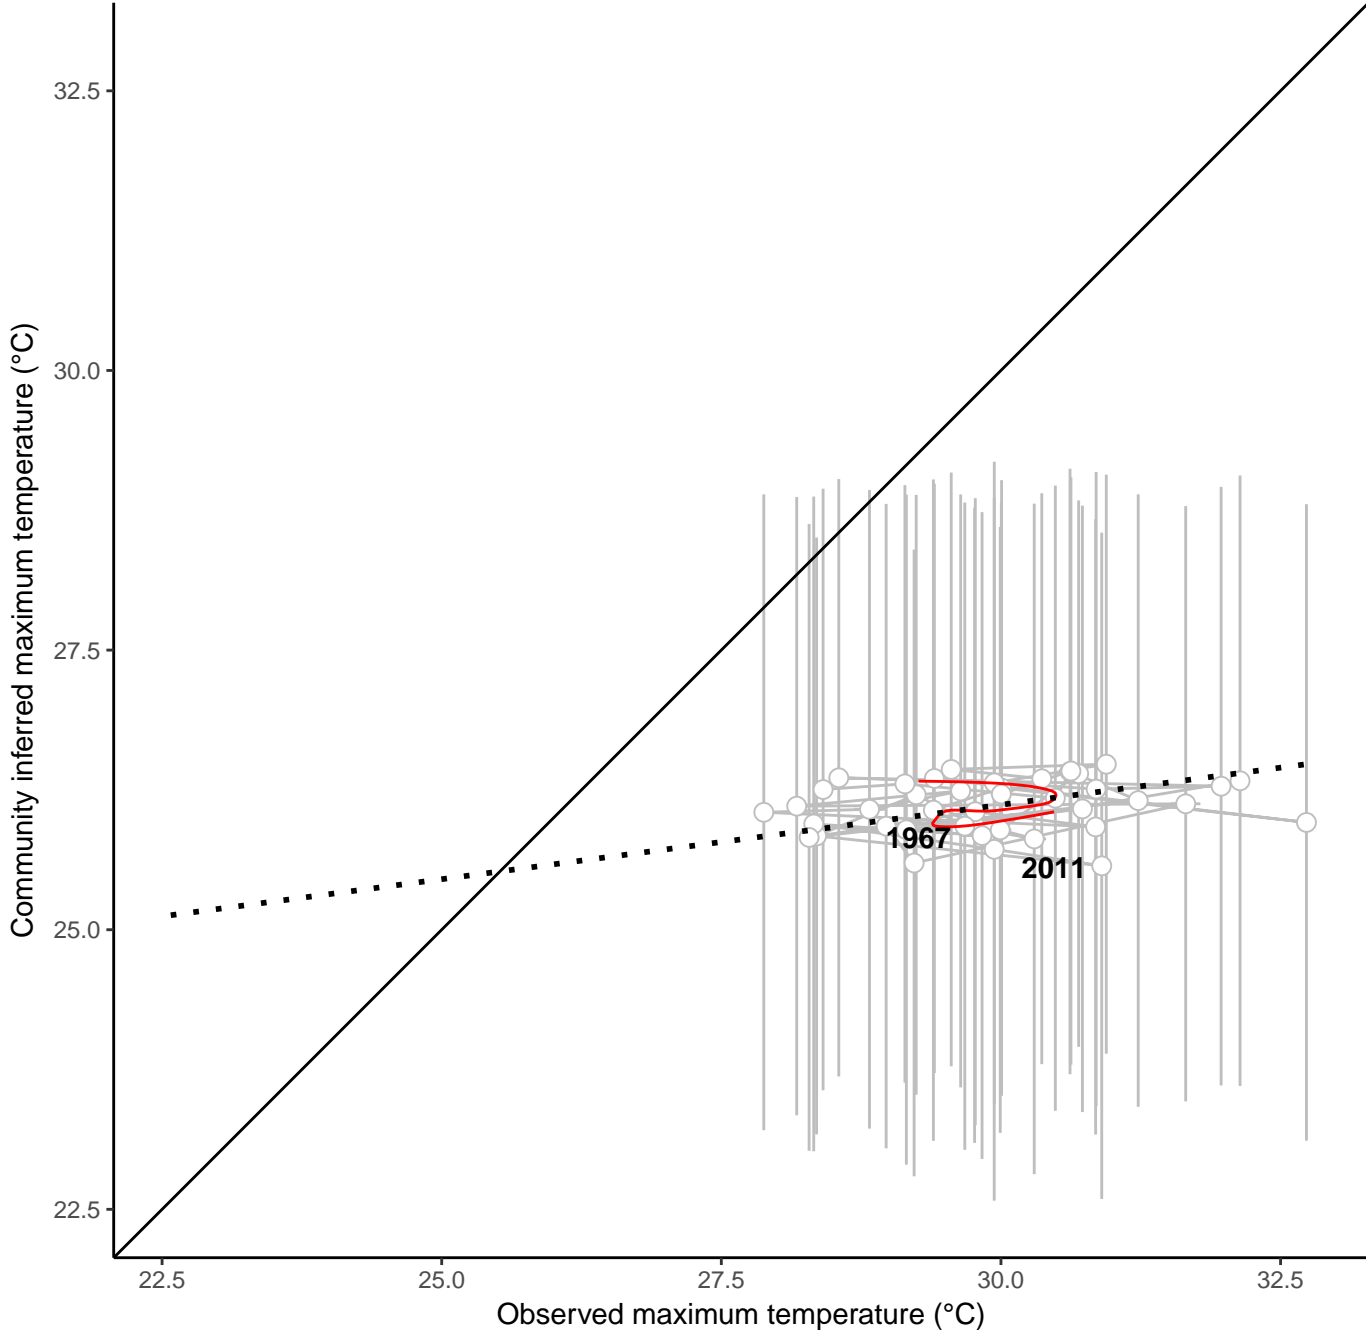

site : 840\_7\_19

absolute deviation = 4.76 | deviation change = -0.09 | maximum state number = 2

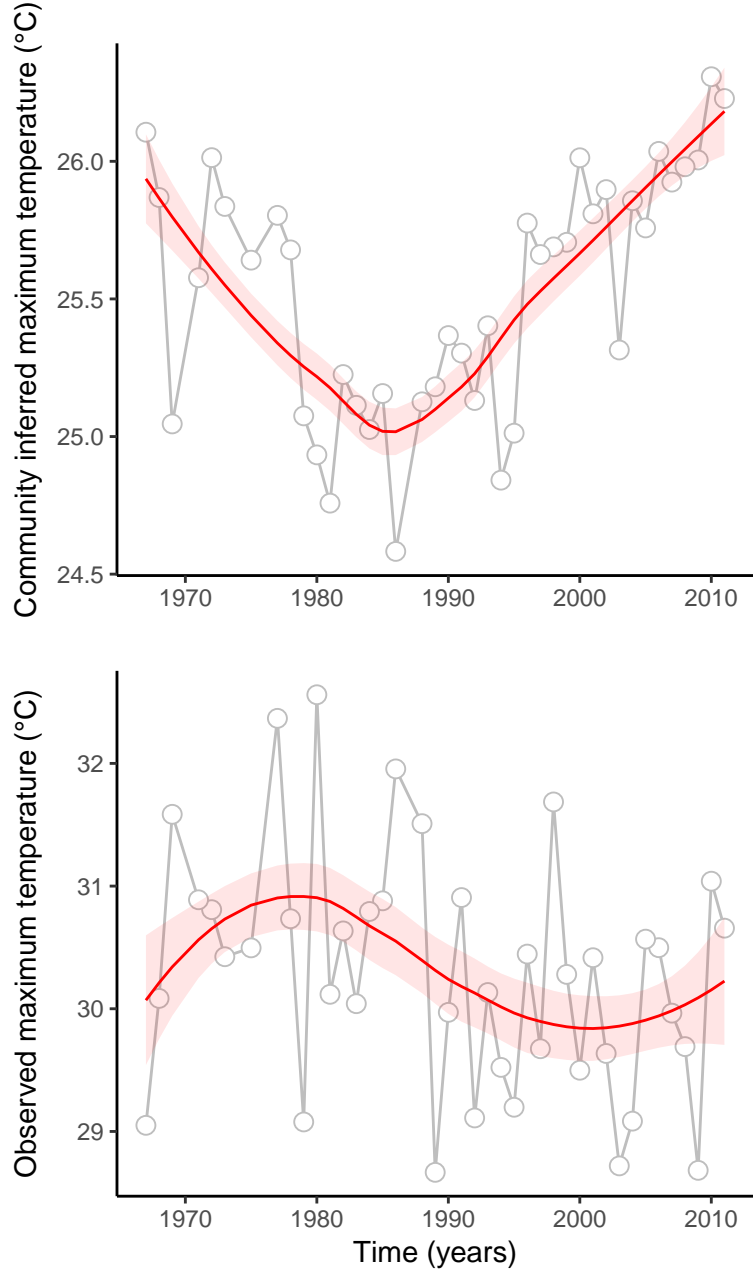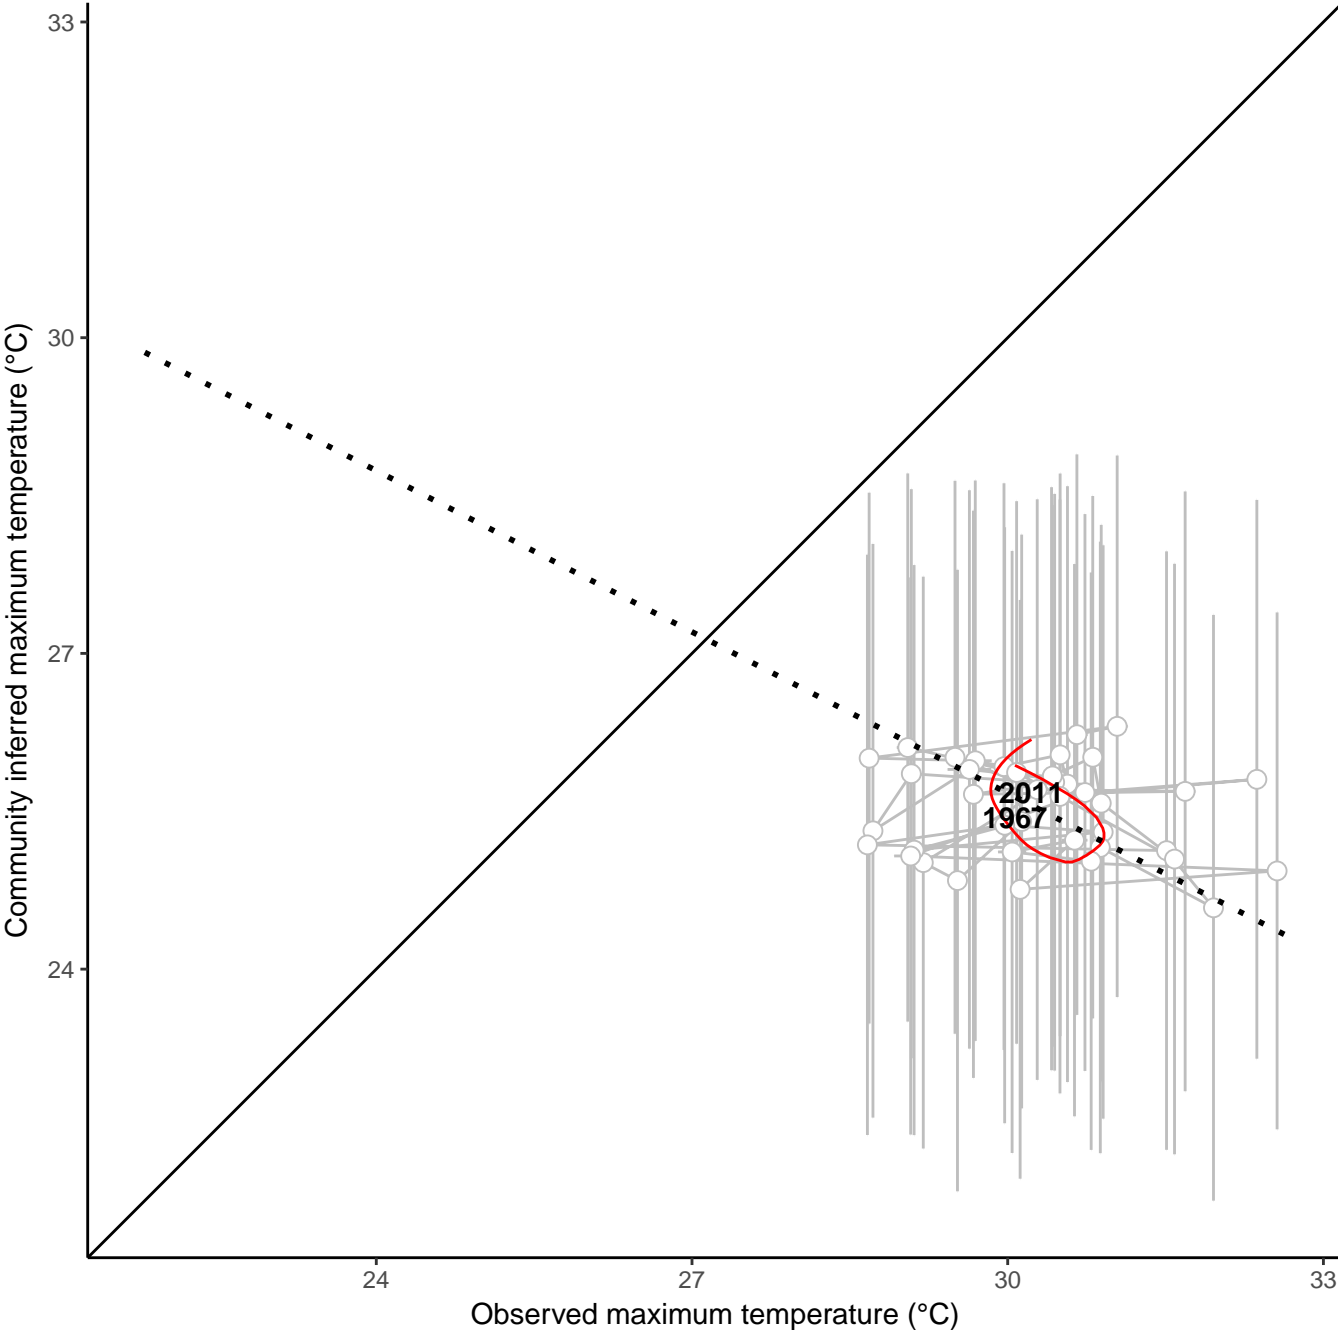



site : 840\_91\_39

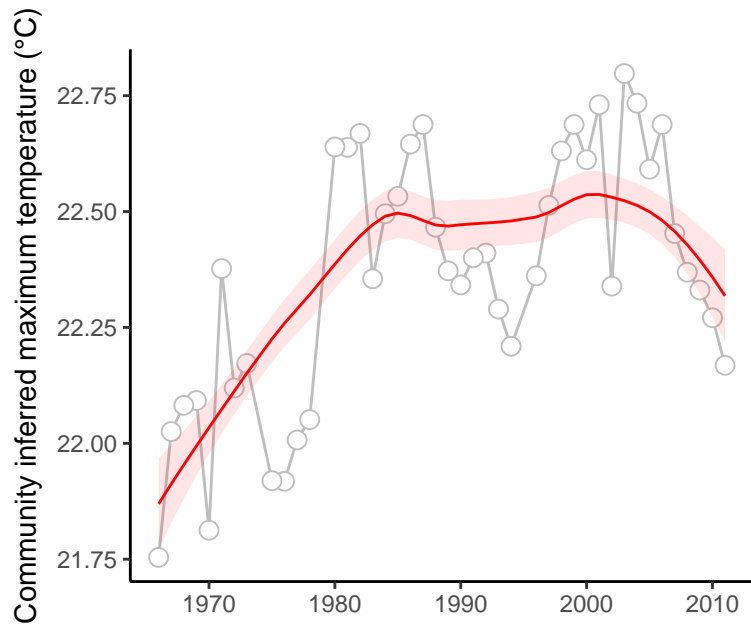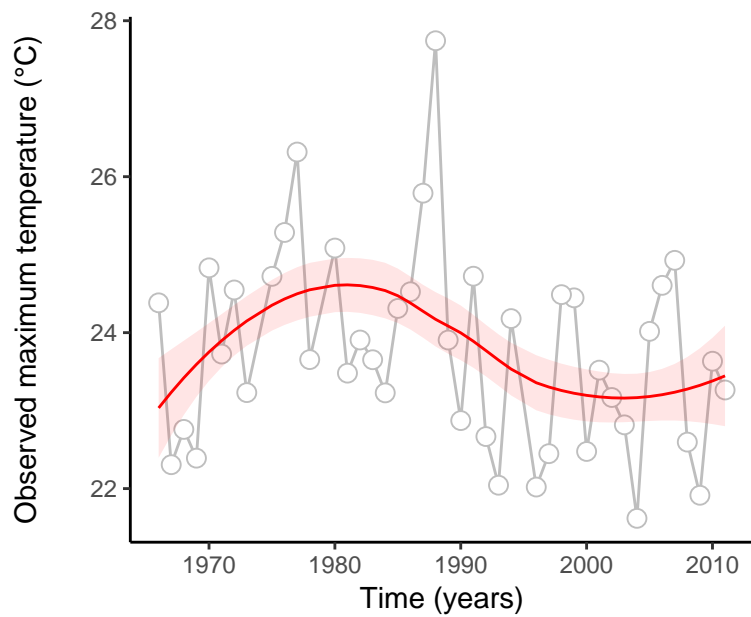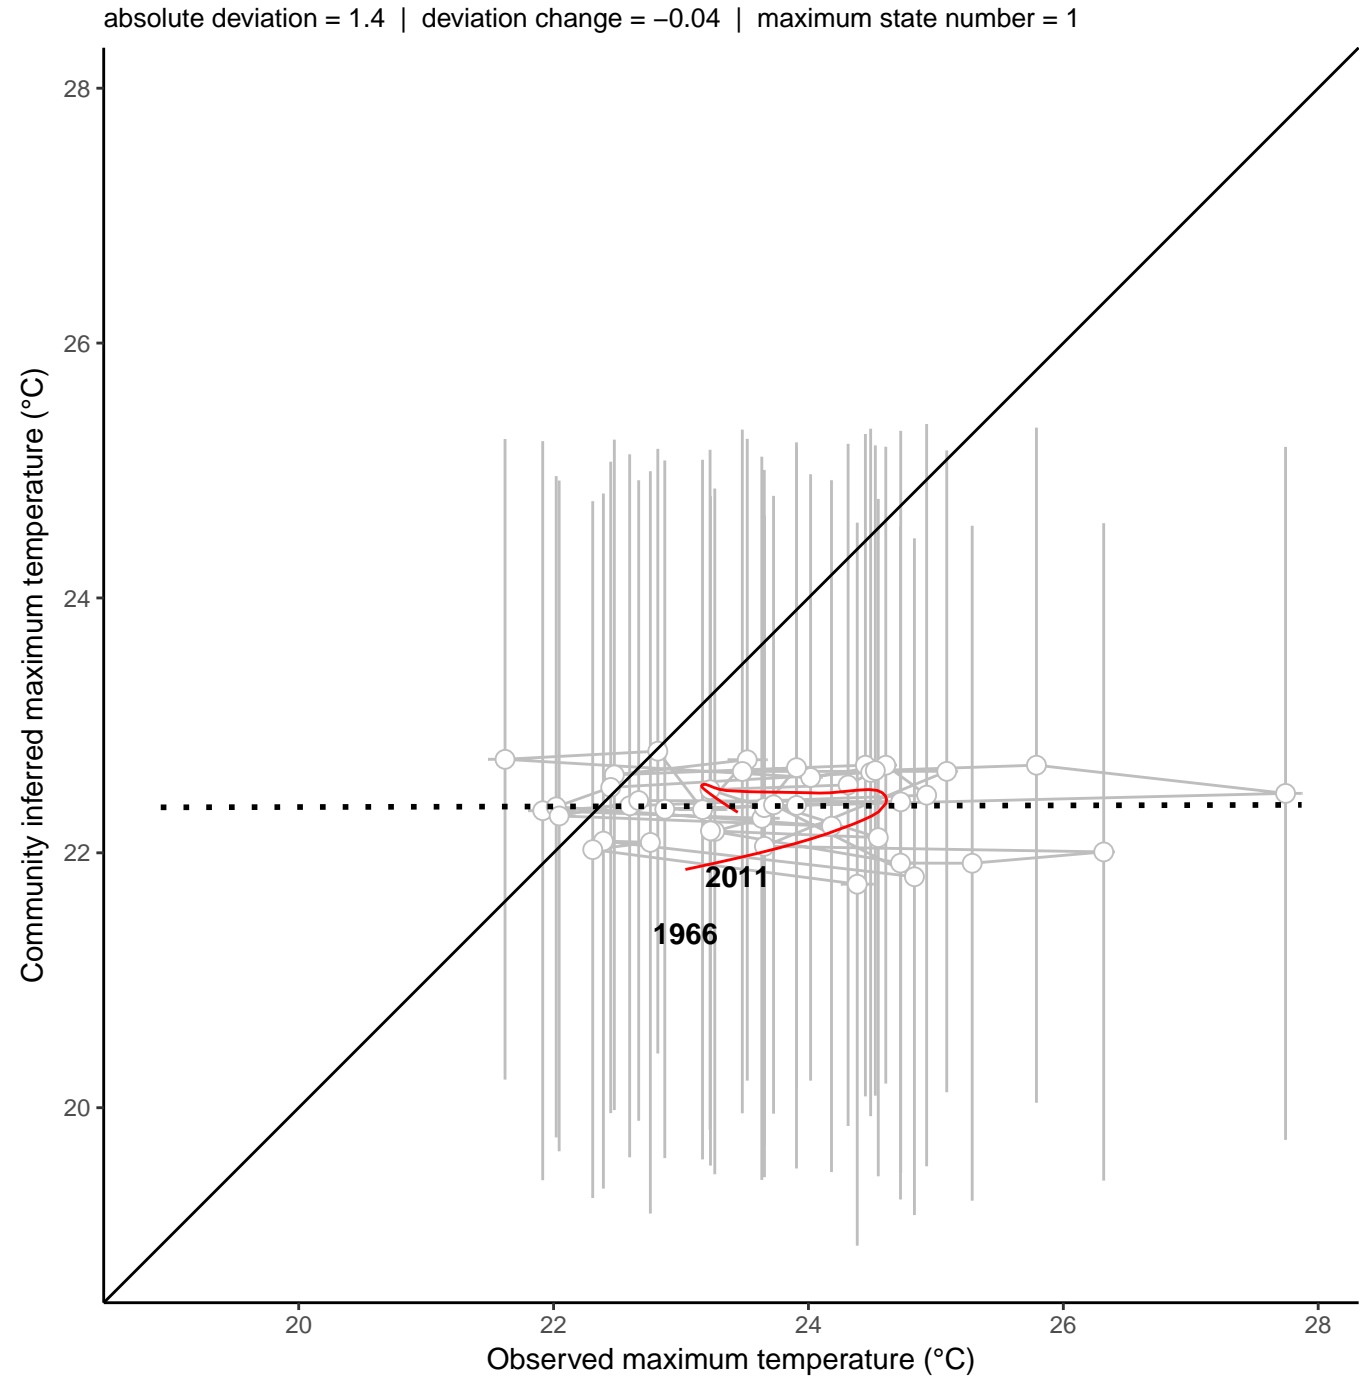

site : 840\_2\_22

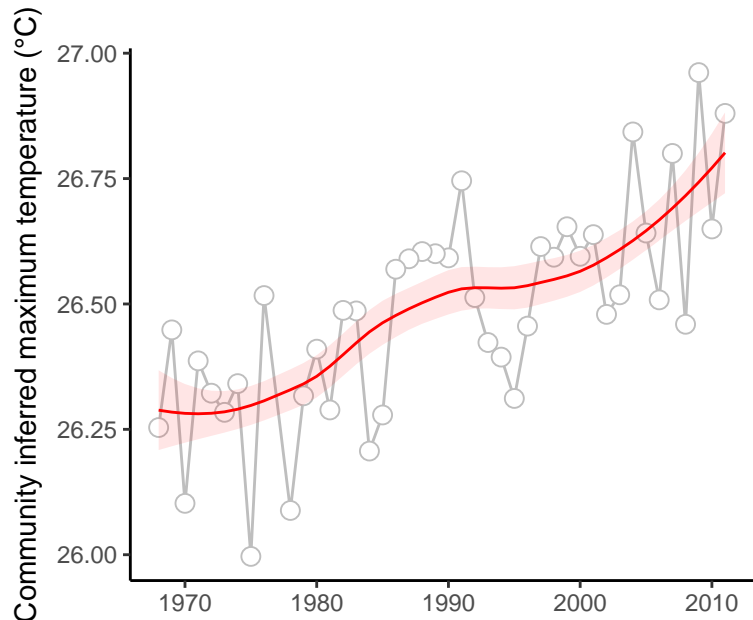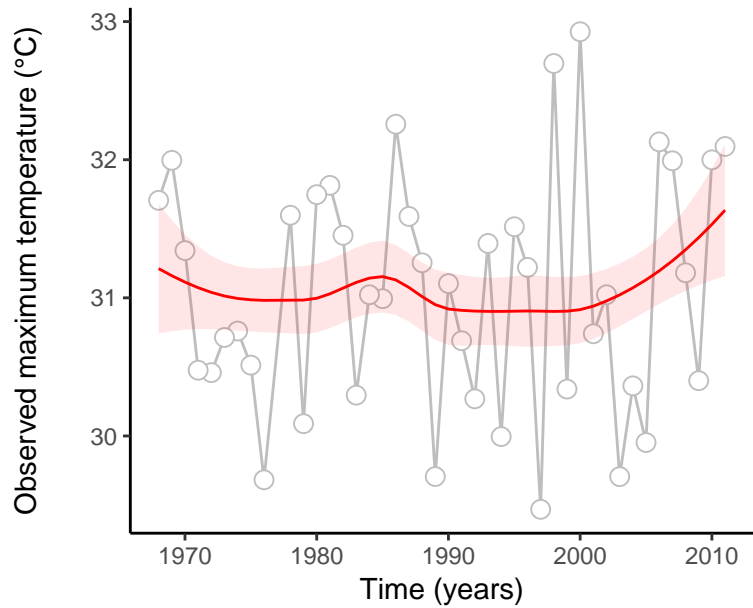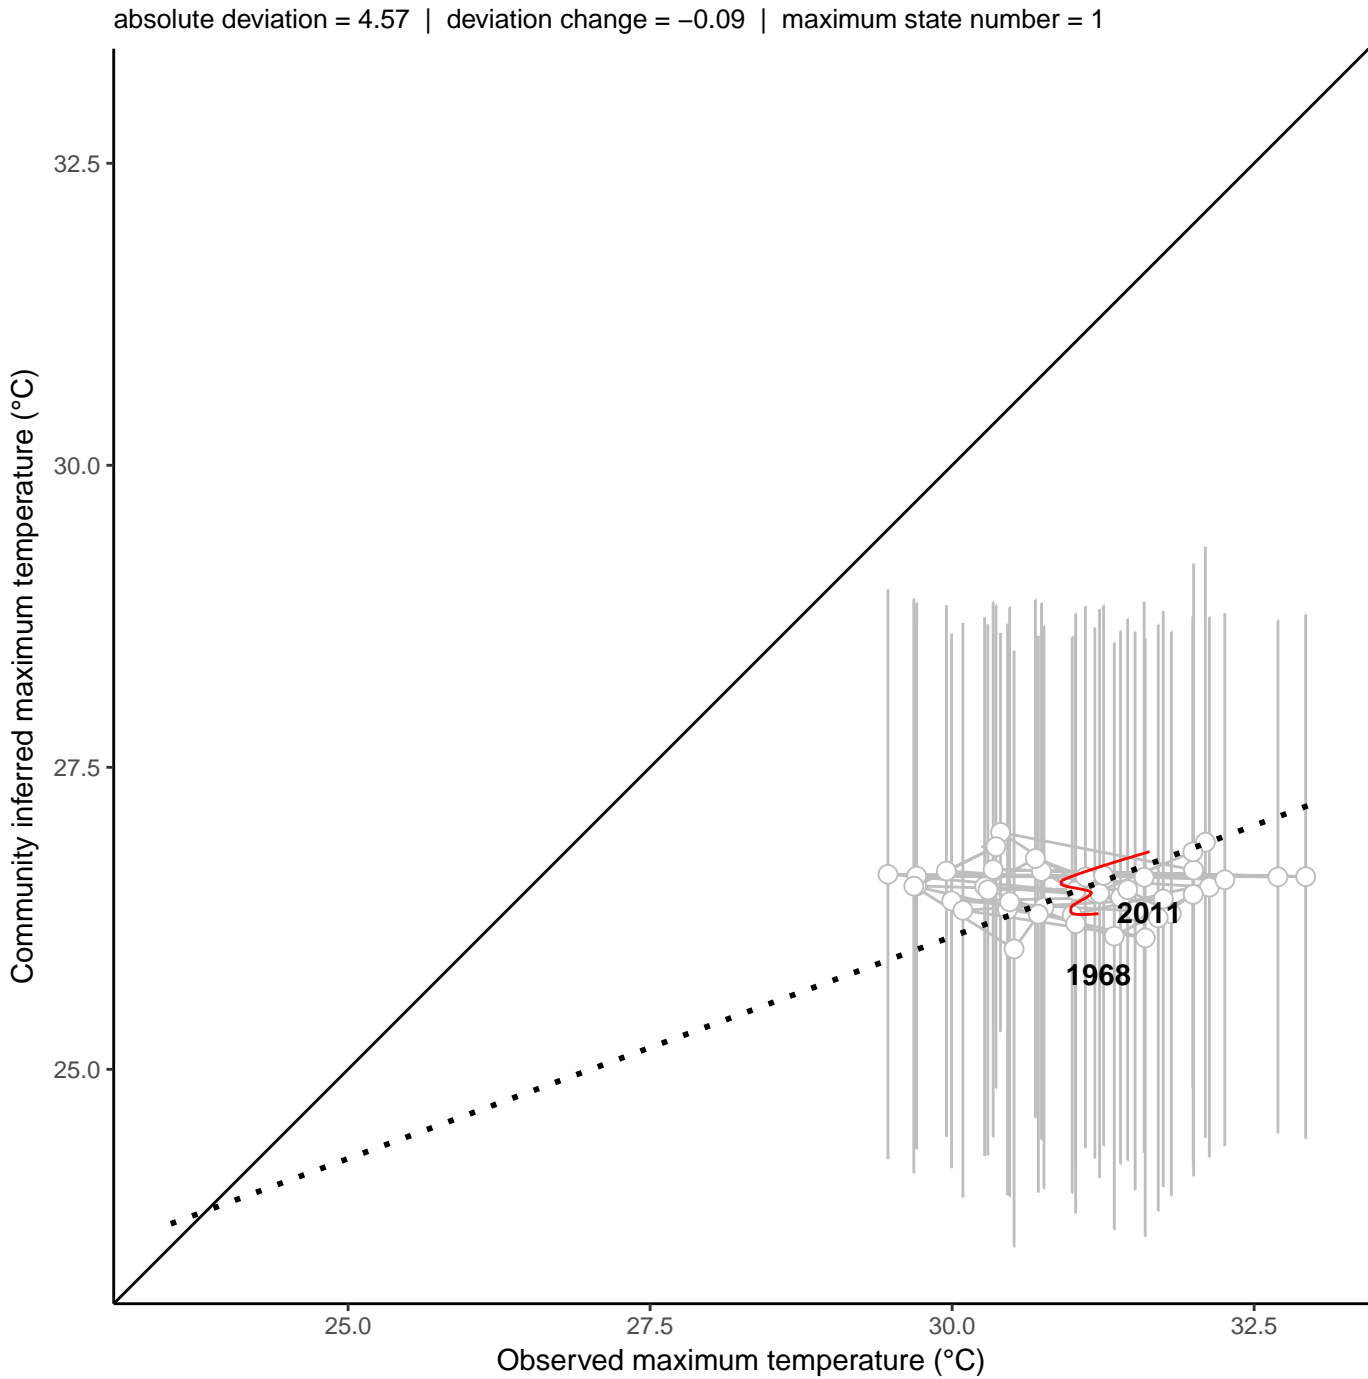

site : 840\_2\_23

absolute deviation = 4.28 | deviation change = 0.41 | maximum state number = 1

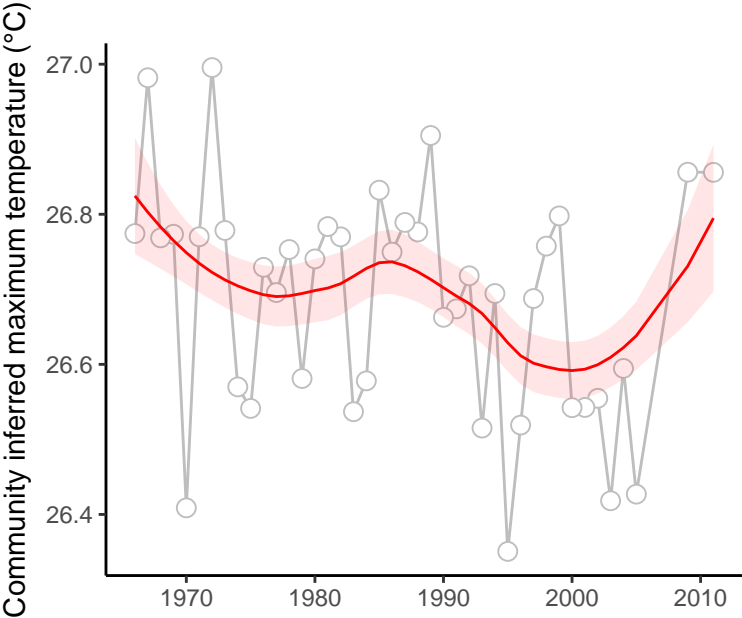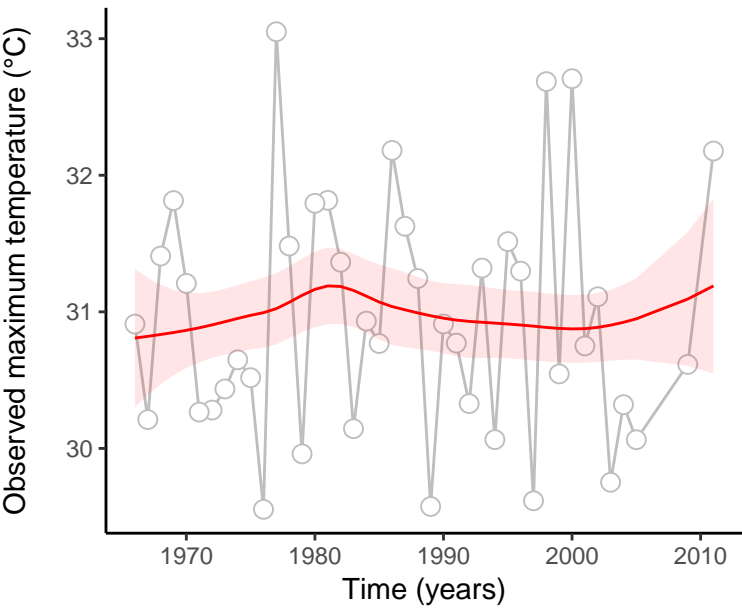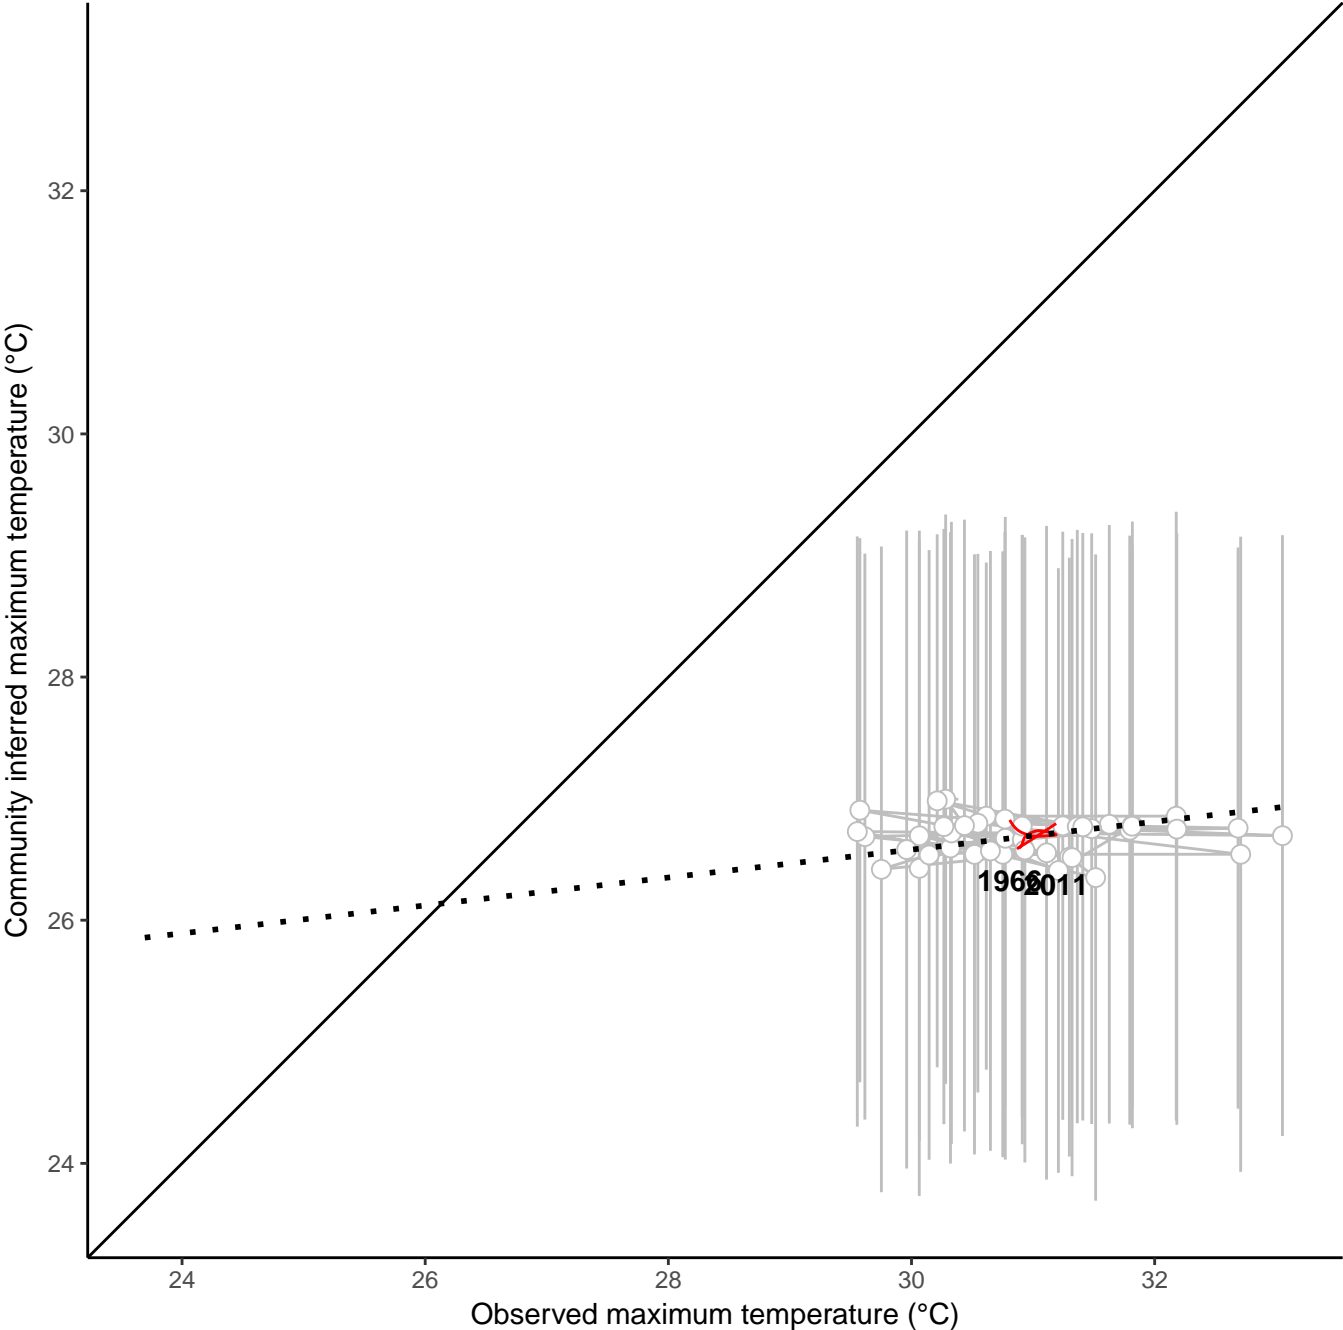

site : 840\_35\_29

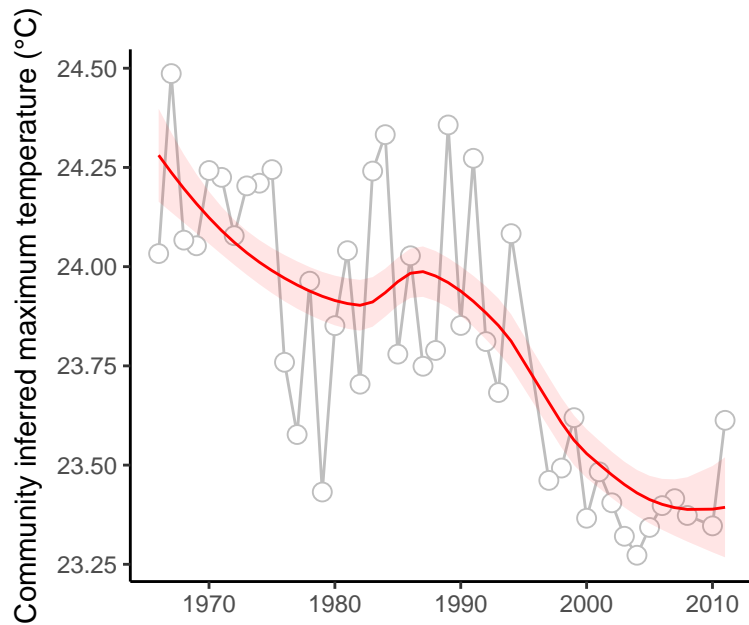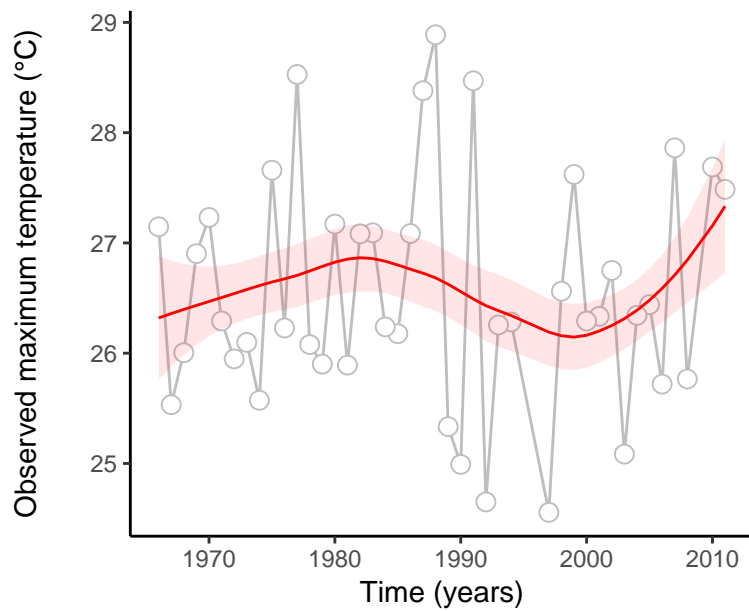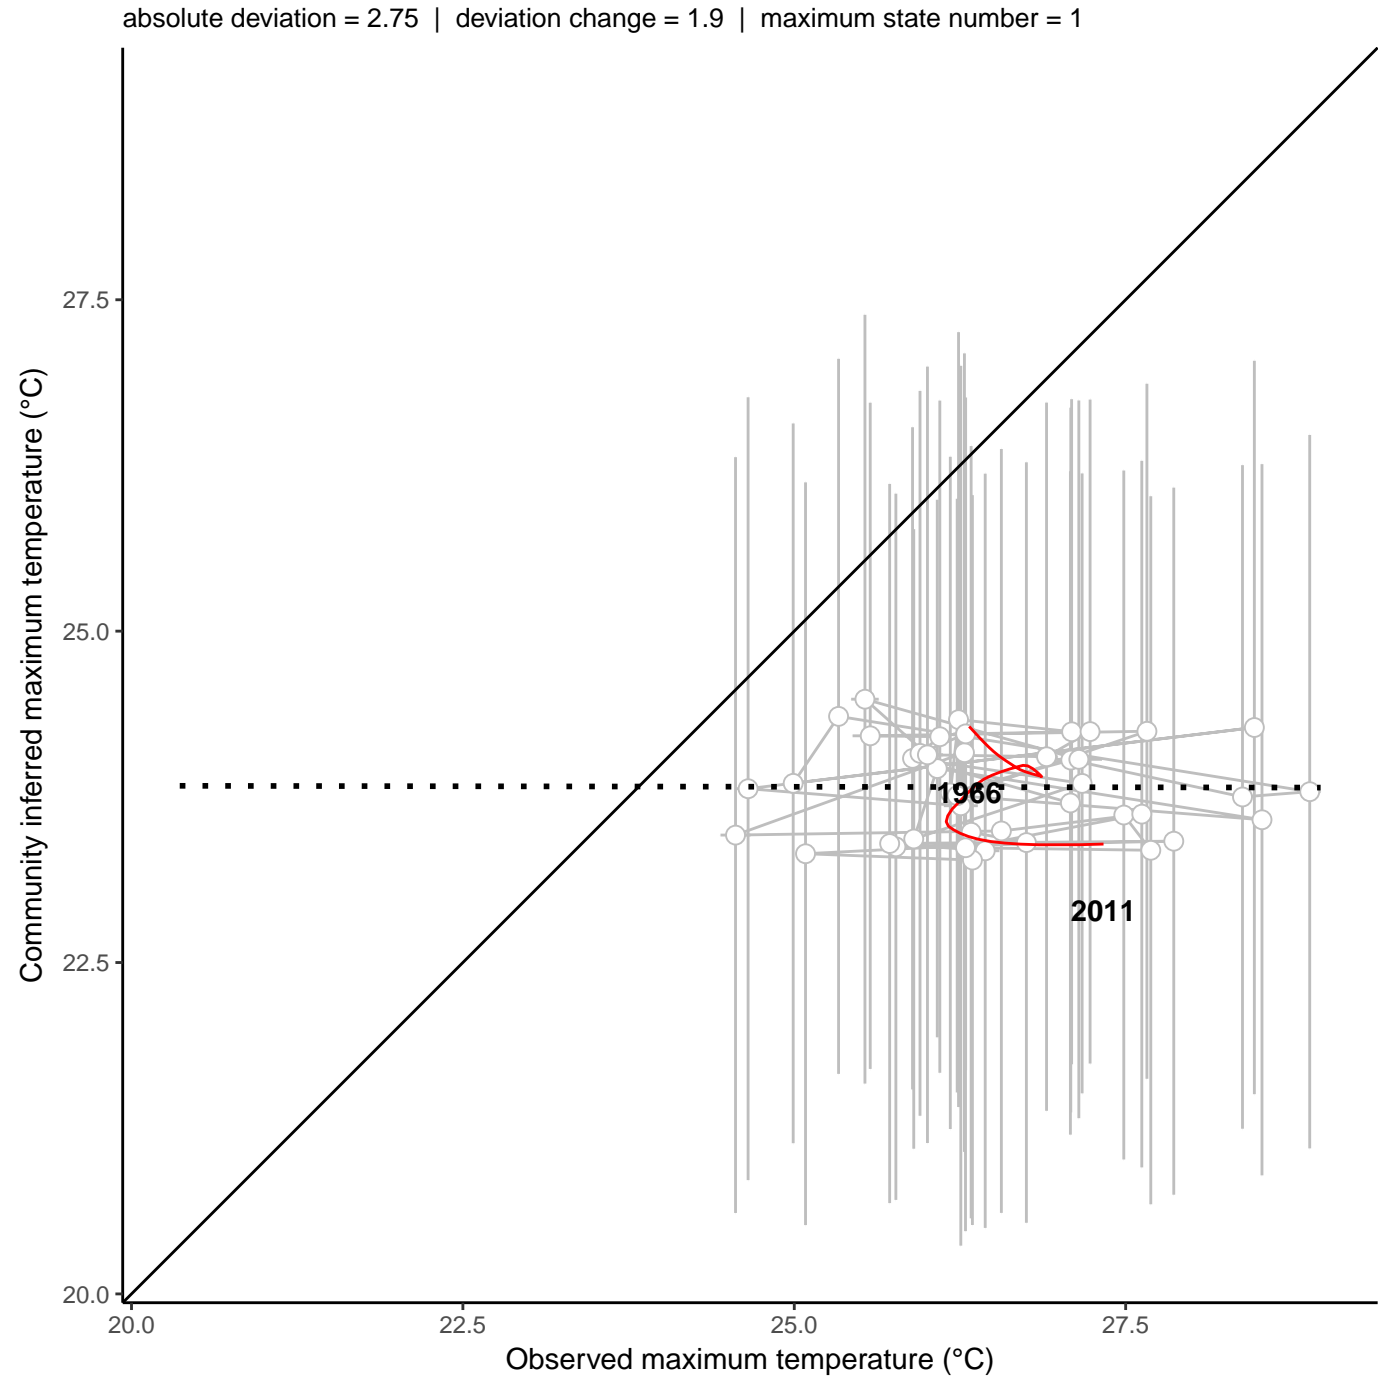

site : 840\_38\_36

absolute deviation = 5.47 | deviation change = 2.28 | maximum state number = 1

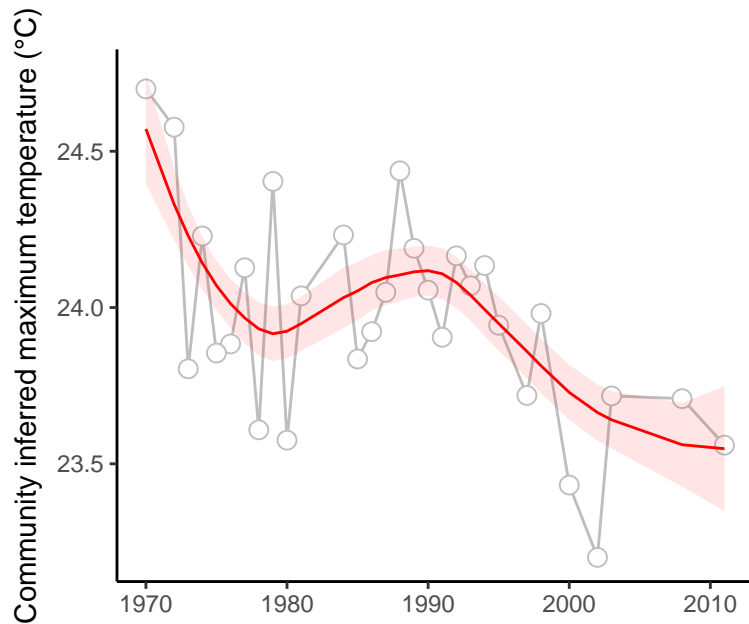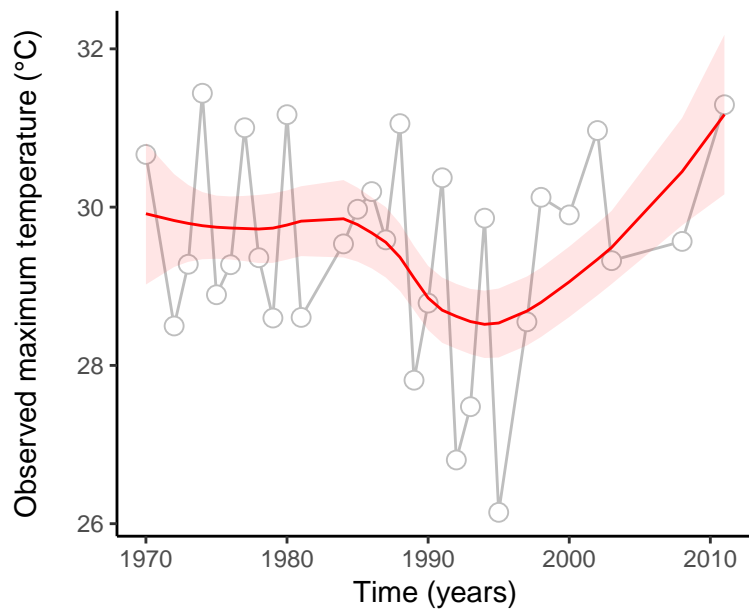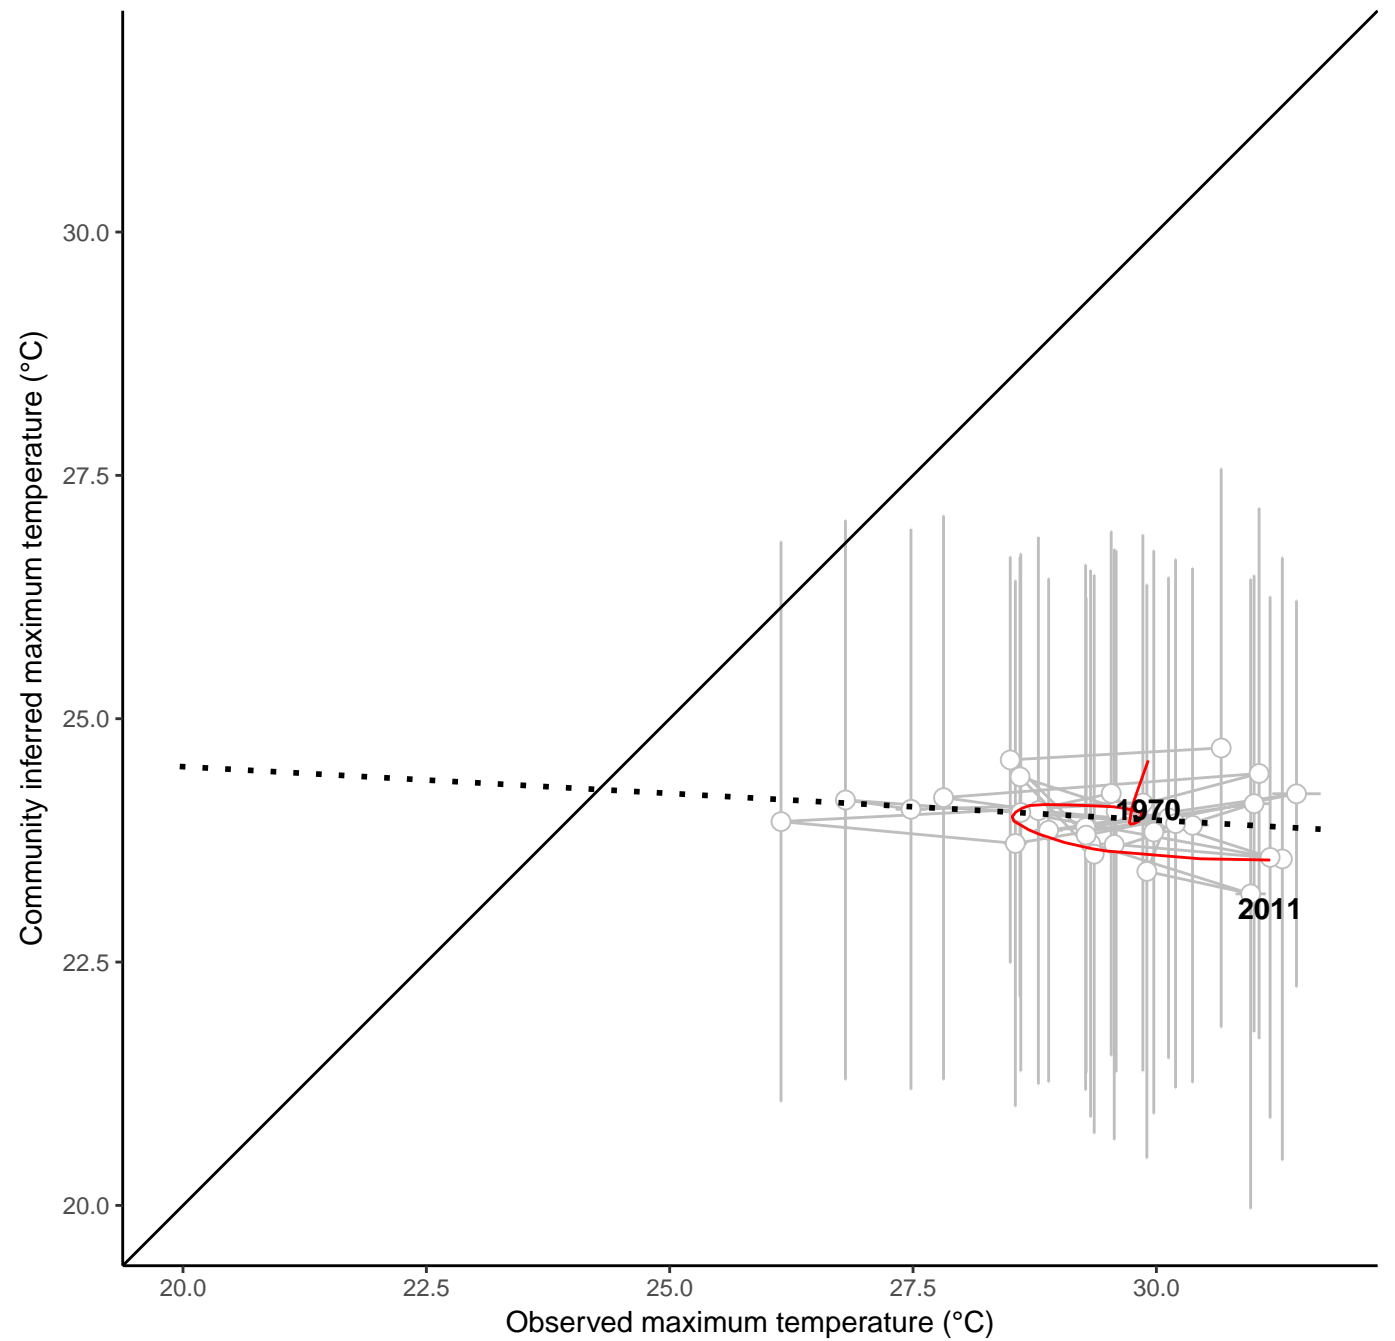

site : 840\_46\_34

absolute deviation = 3.01 | deviation change = 1.1 | maximum state number = 1

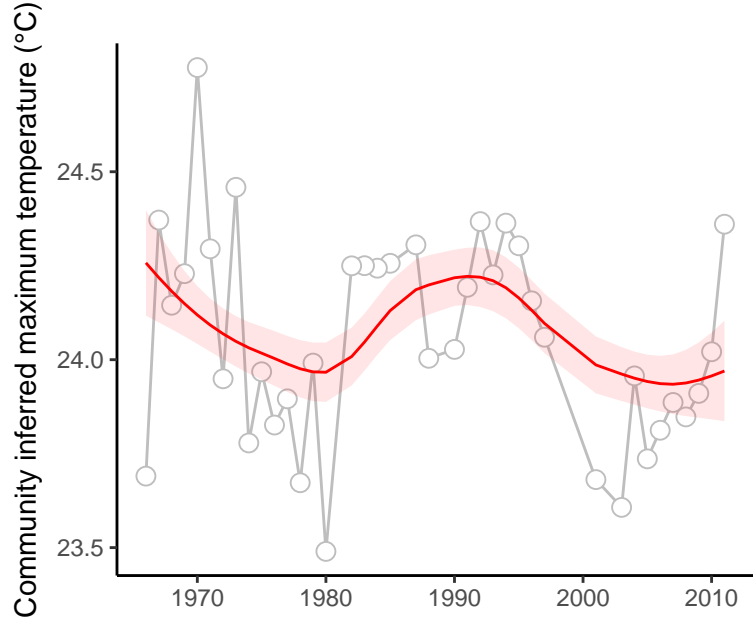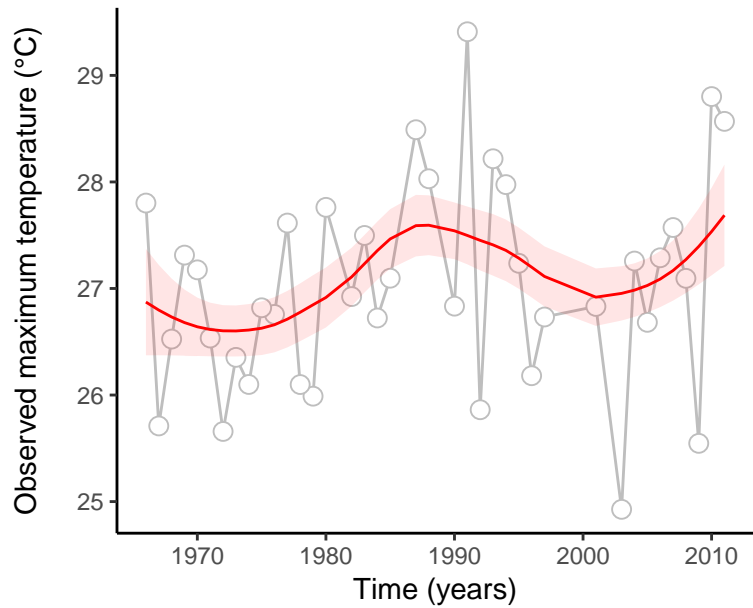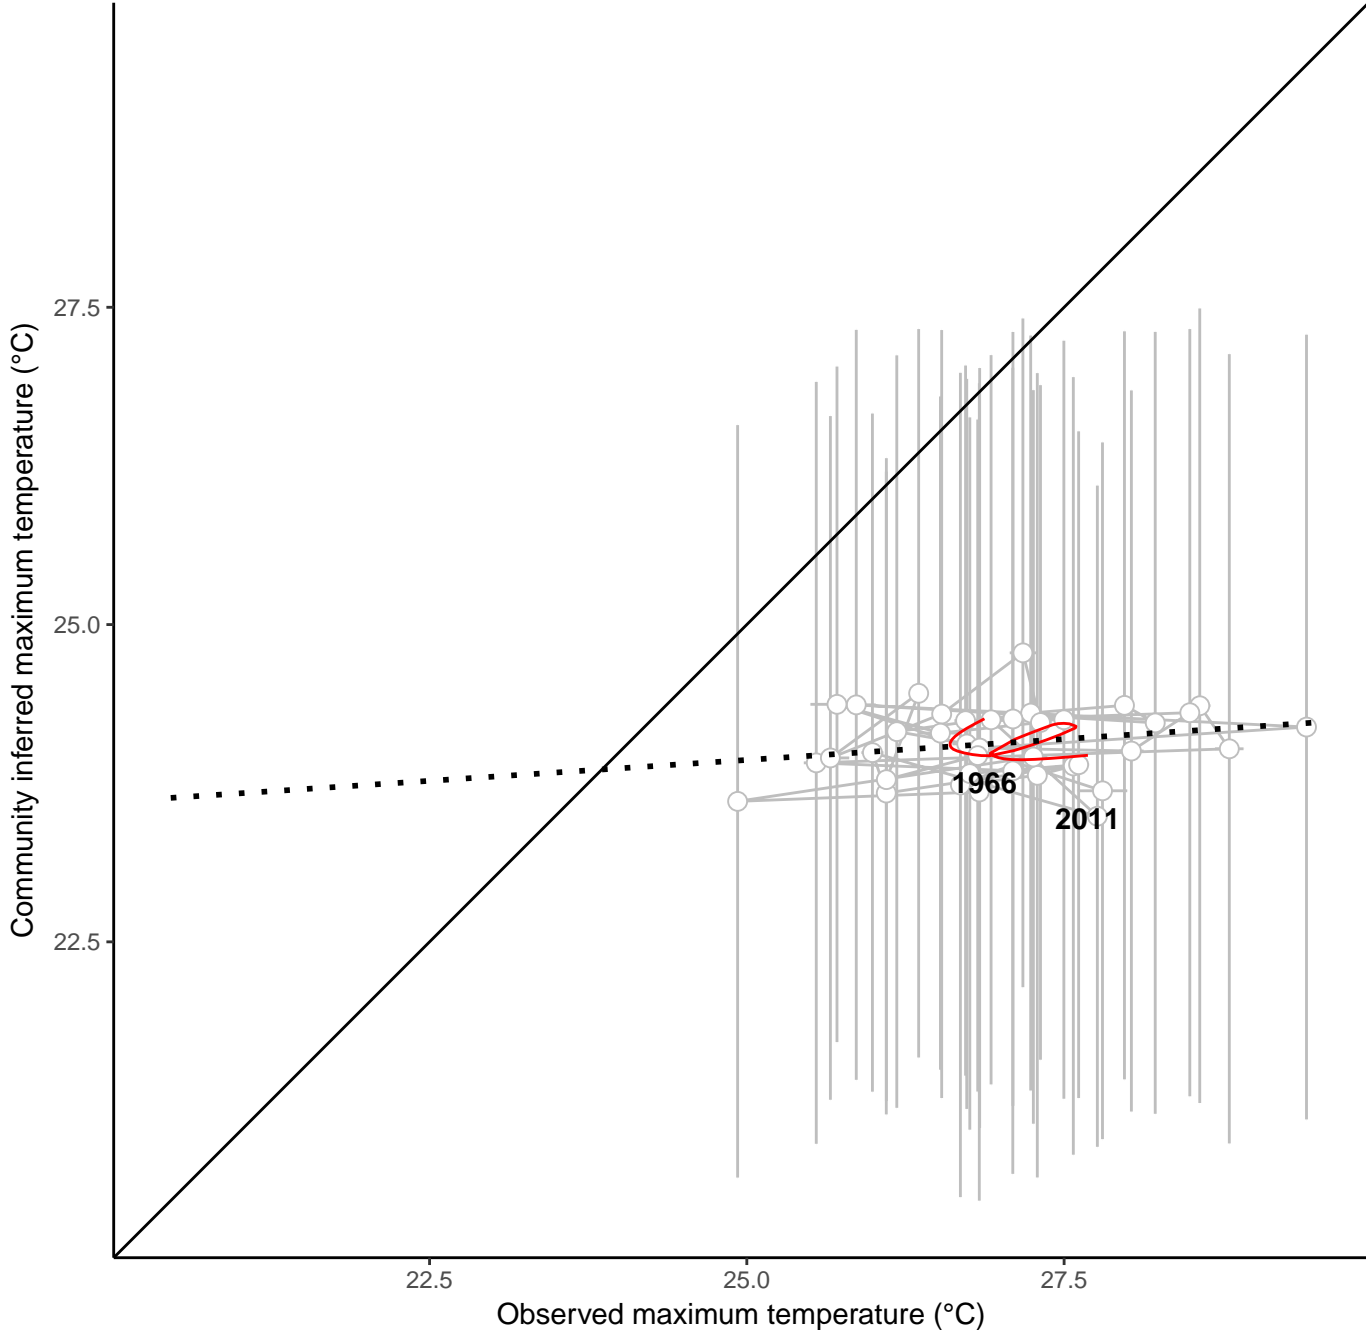

site : 840\_51\_28

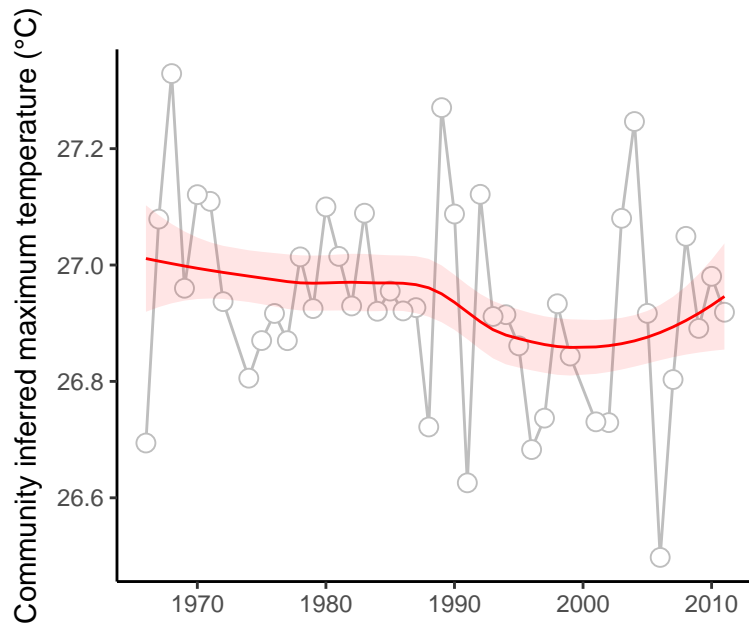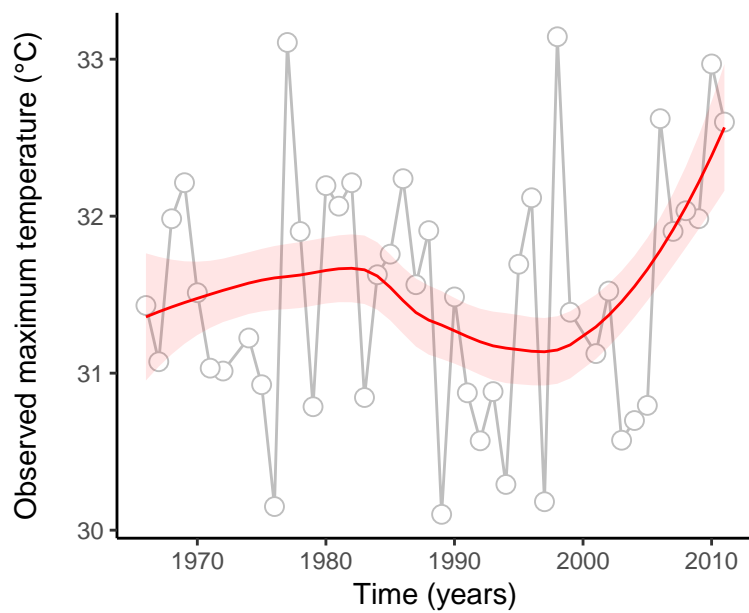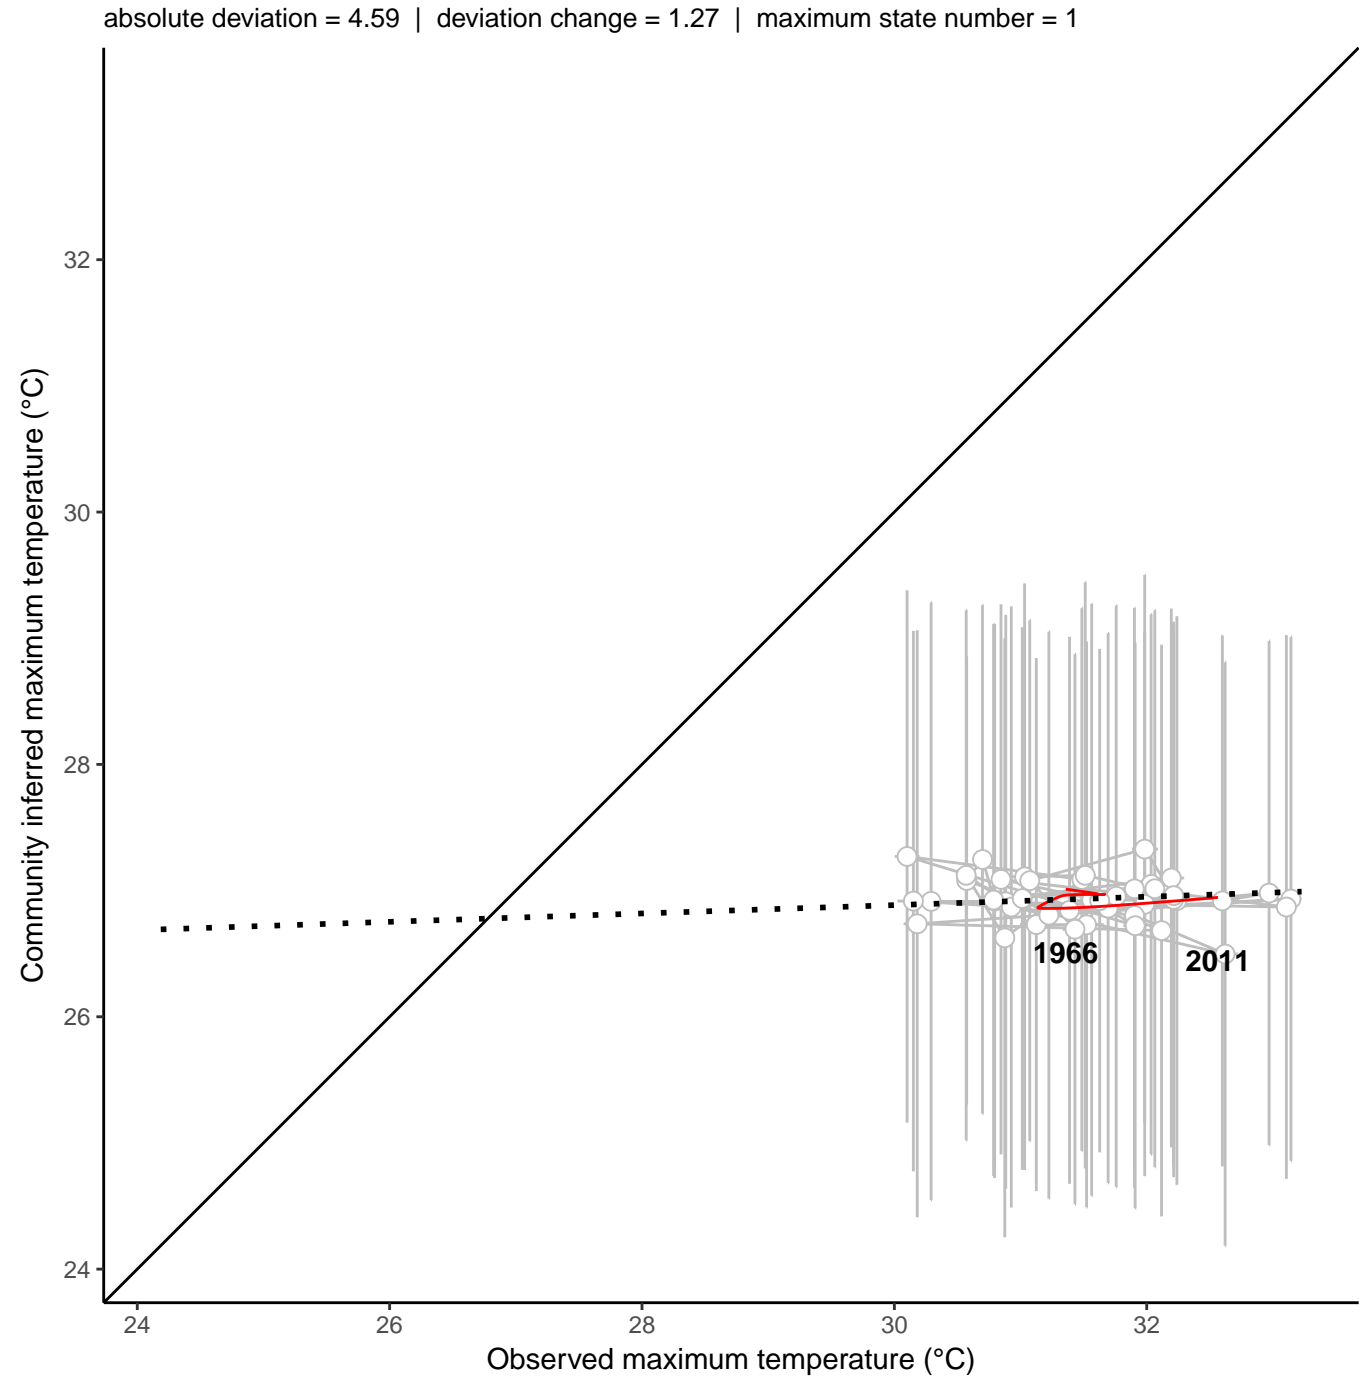

site : 840\_52\_10

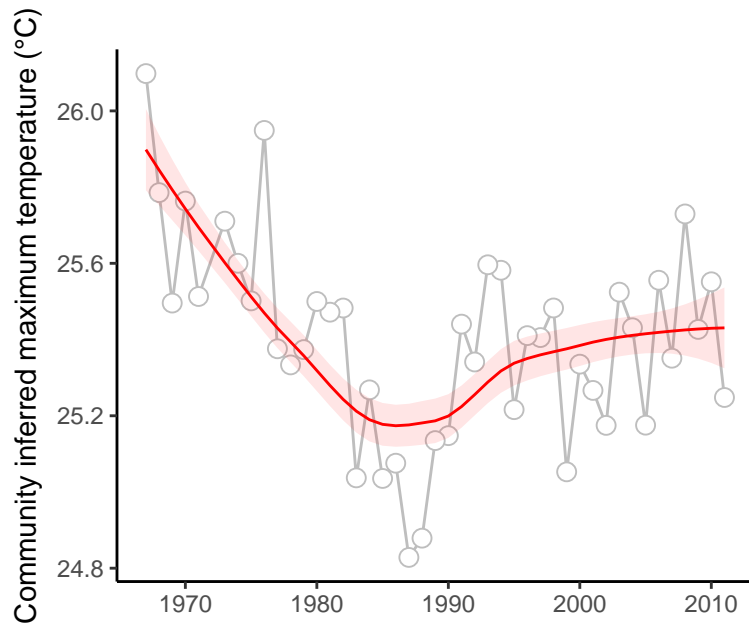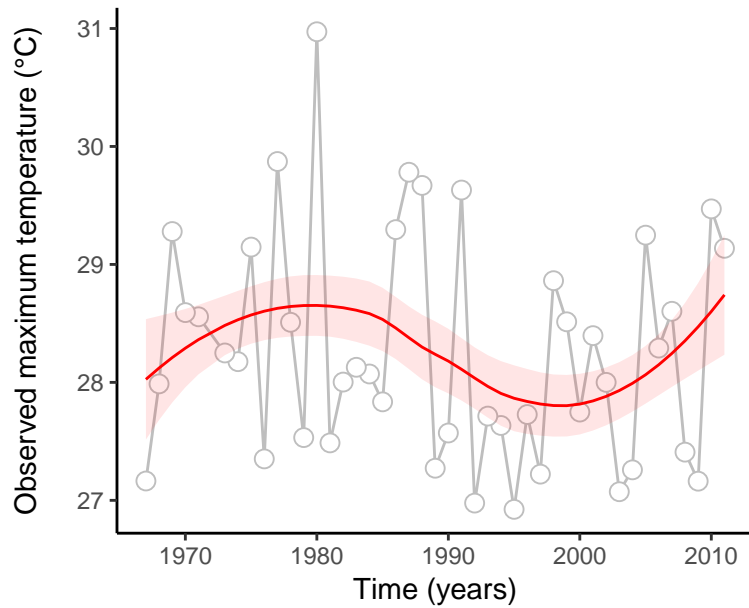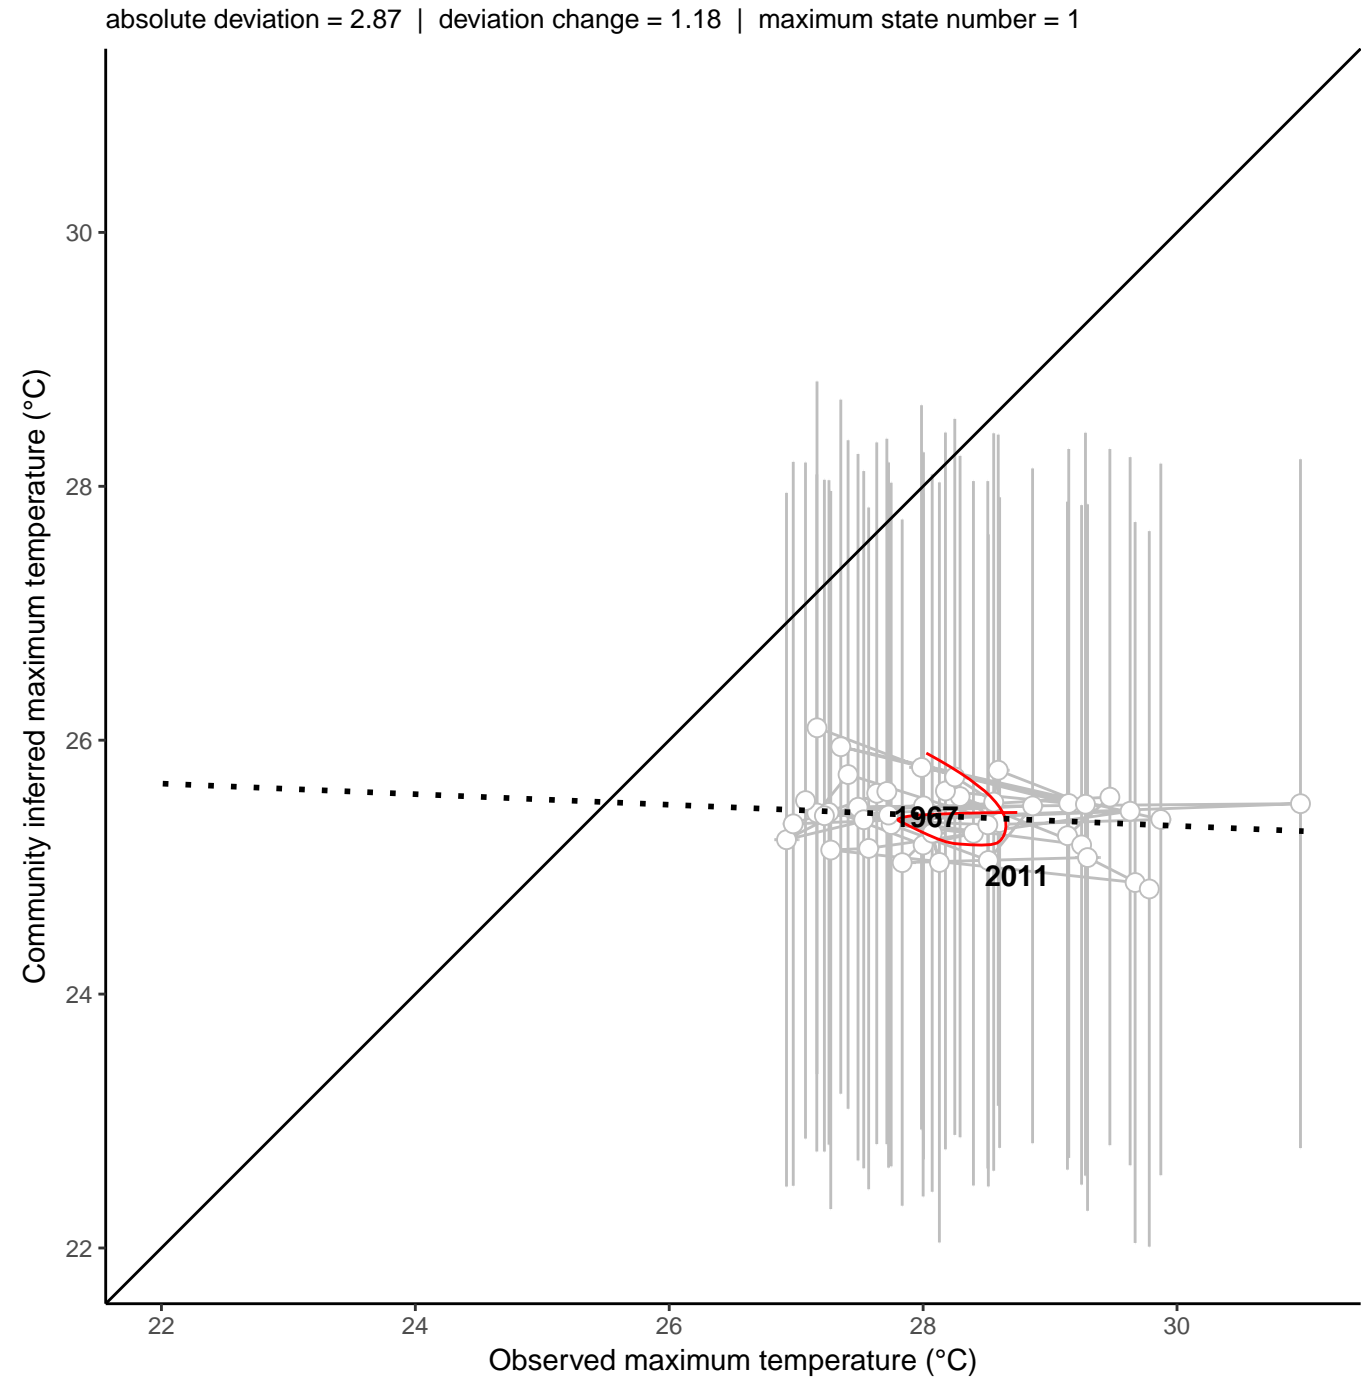



site : 840\_52\_7

absolute deviation = 4.39 | deviation change = 1.09 | maximum state number = 1

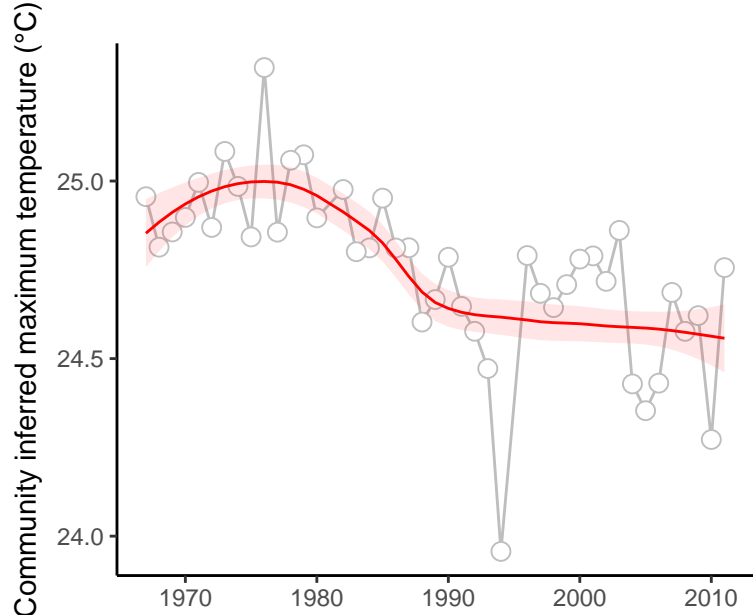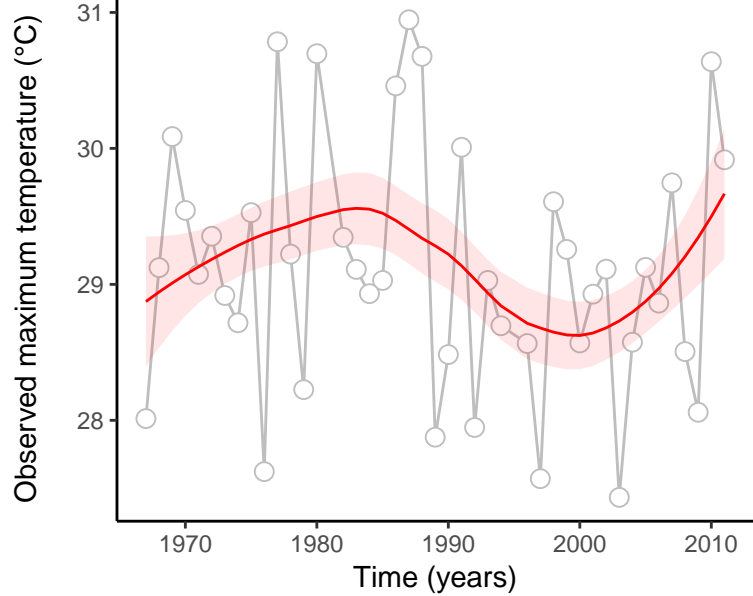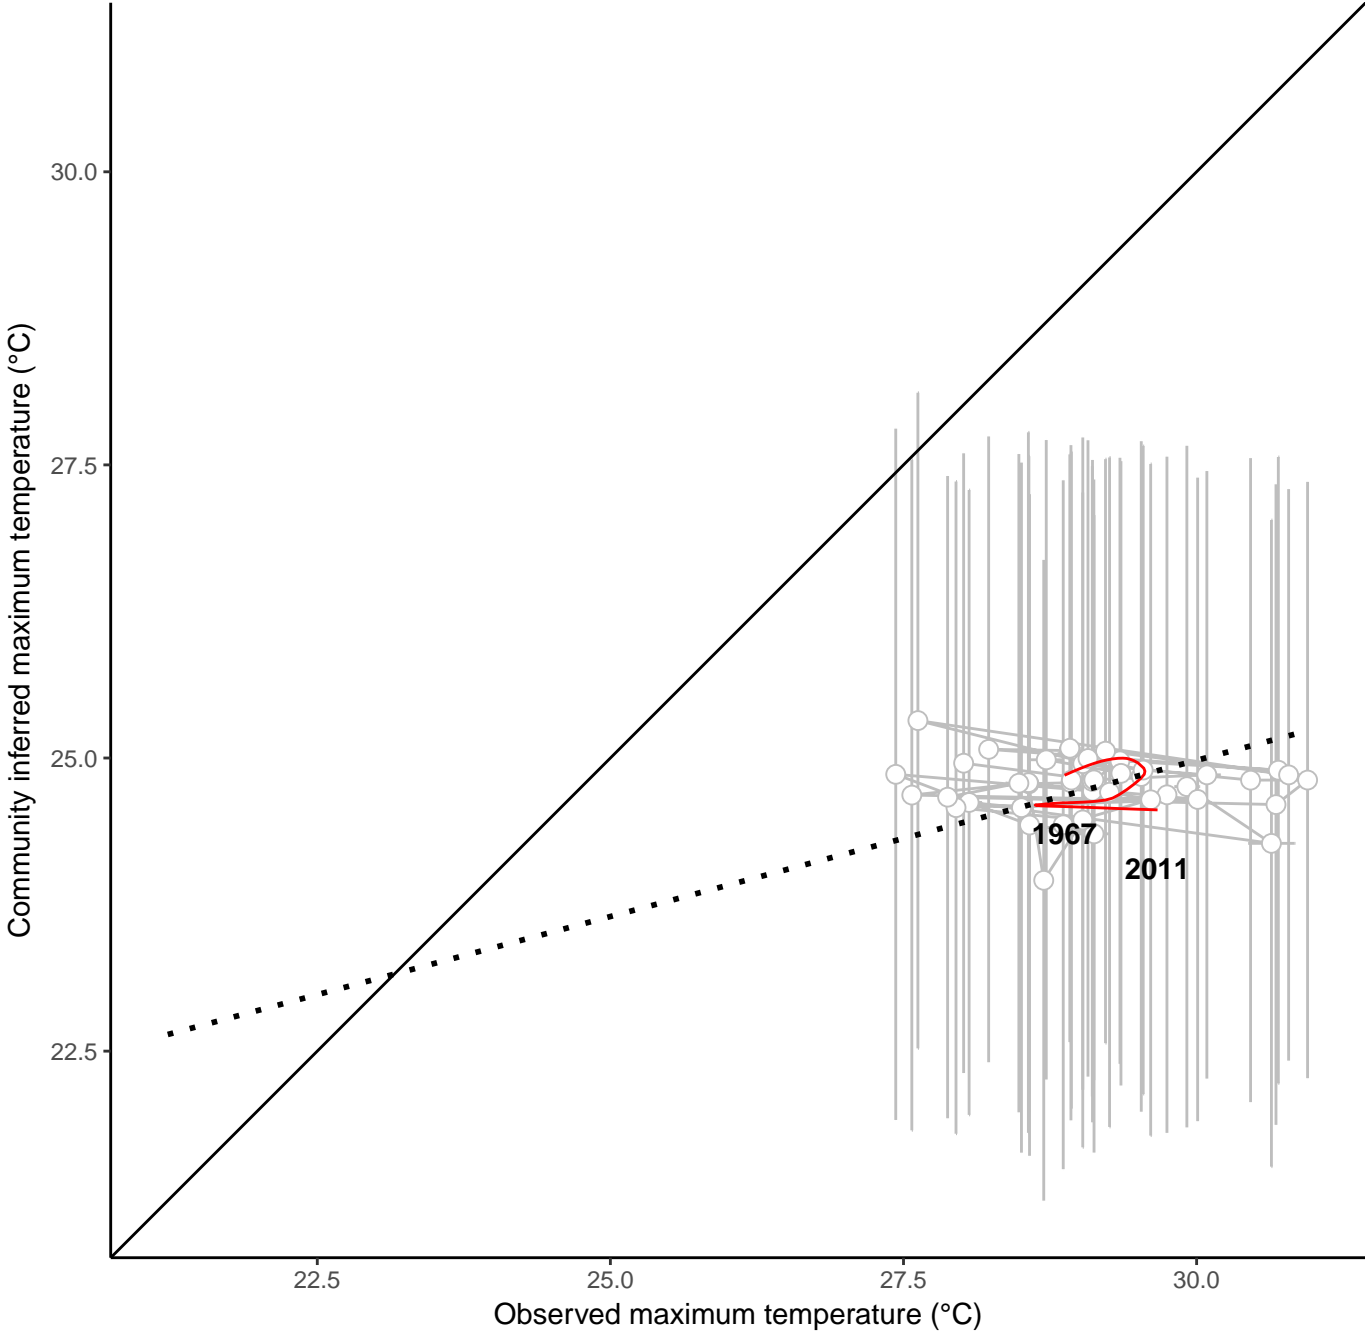

site : 840\_60\_9

absolute deviation = 1.38 | deviation change = 0.92 | maximum state number = 1

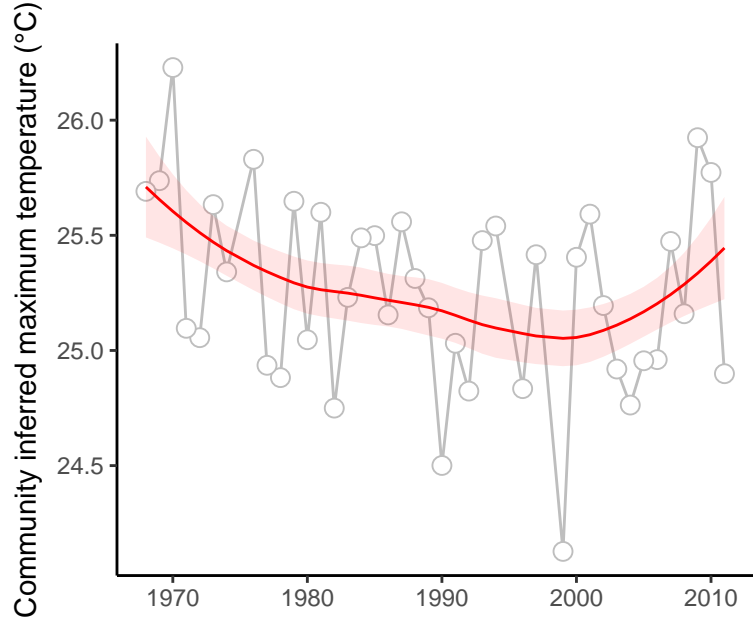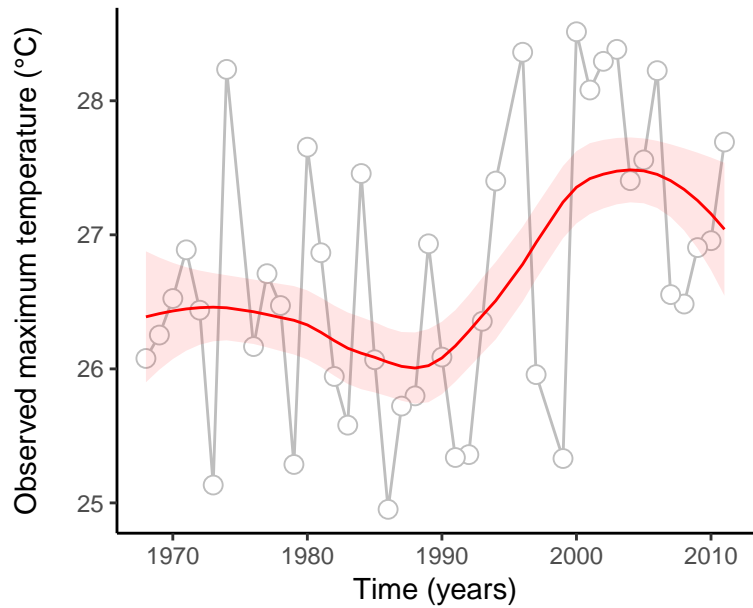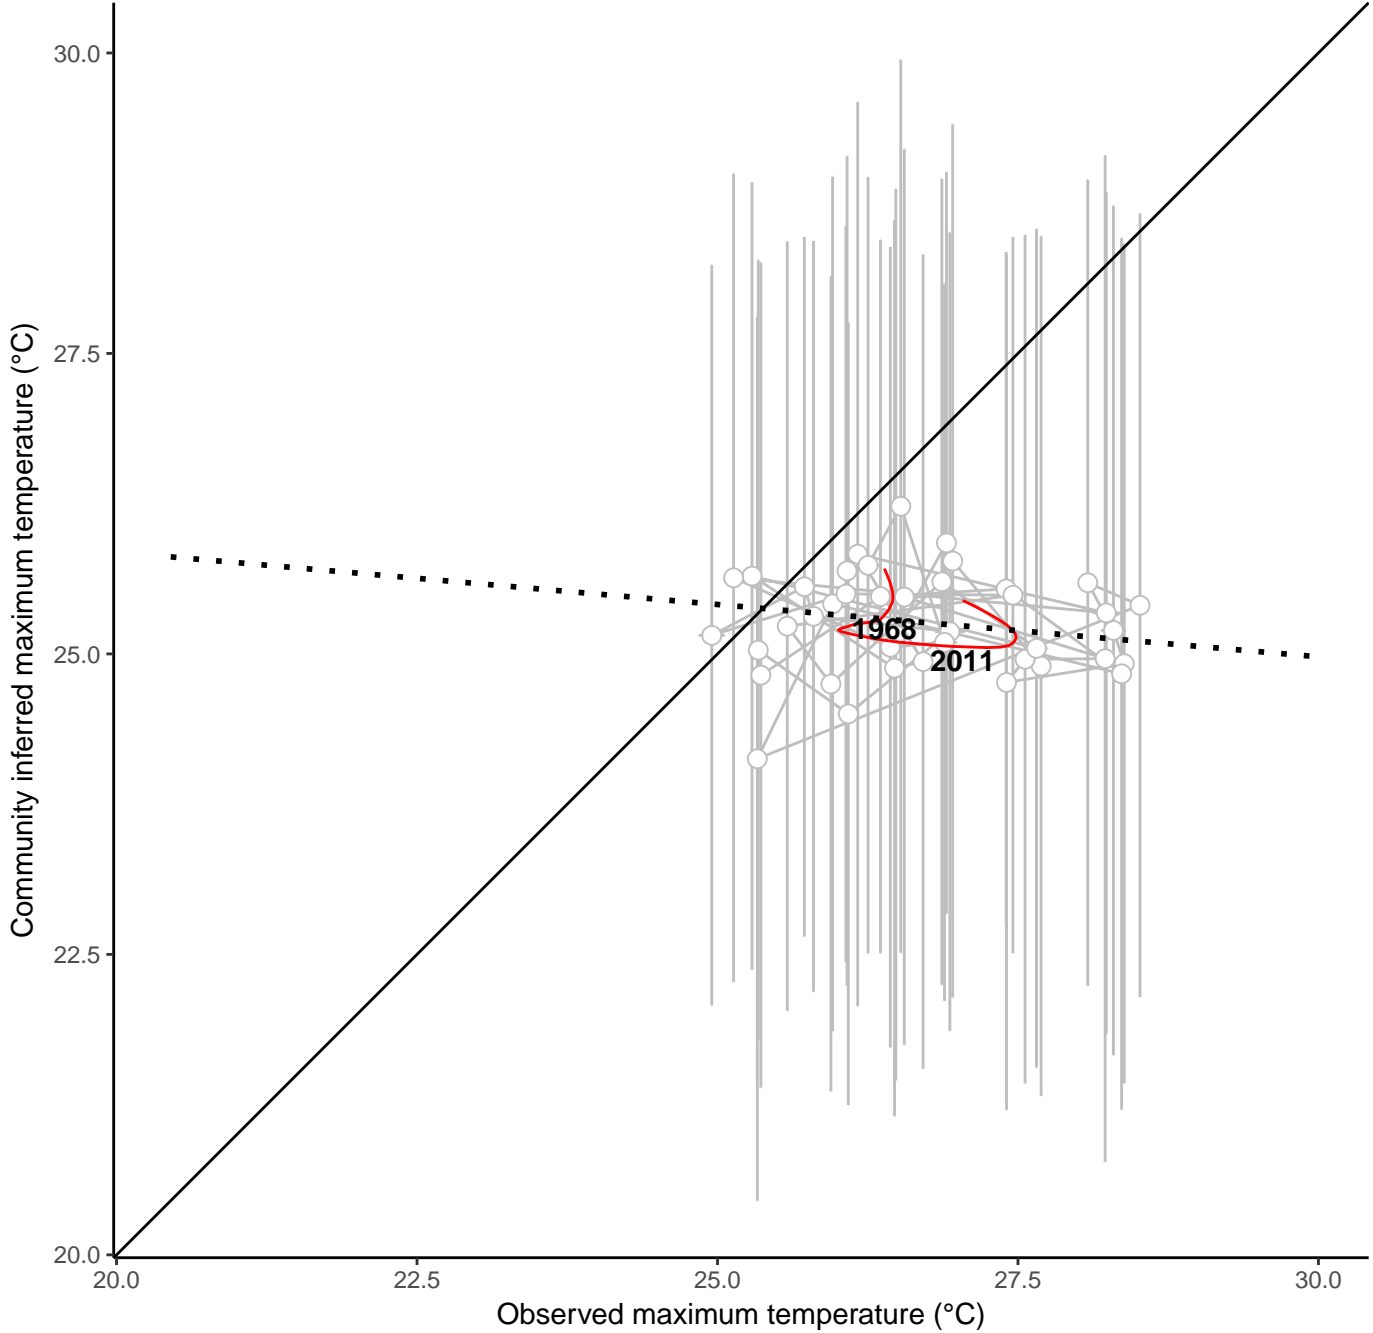

site : 840\_67\_5

absolute deviation = 3.96 | deviation change = 1.44 | maximum state number = 1

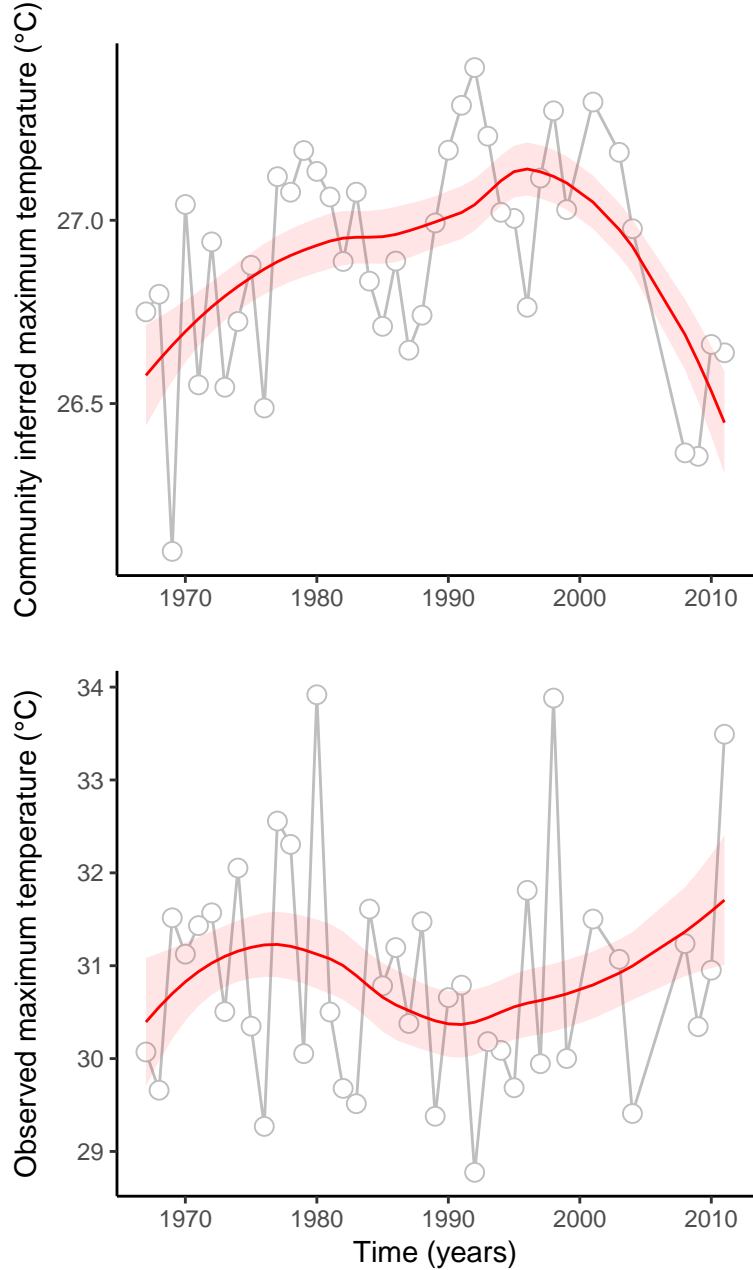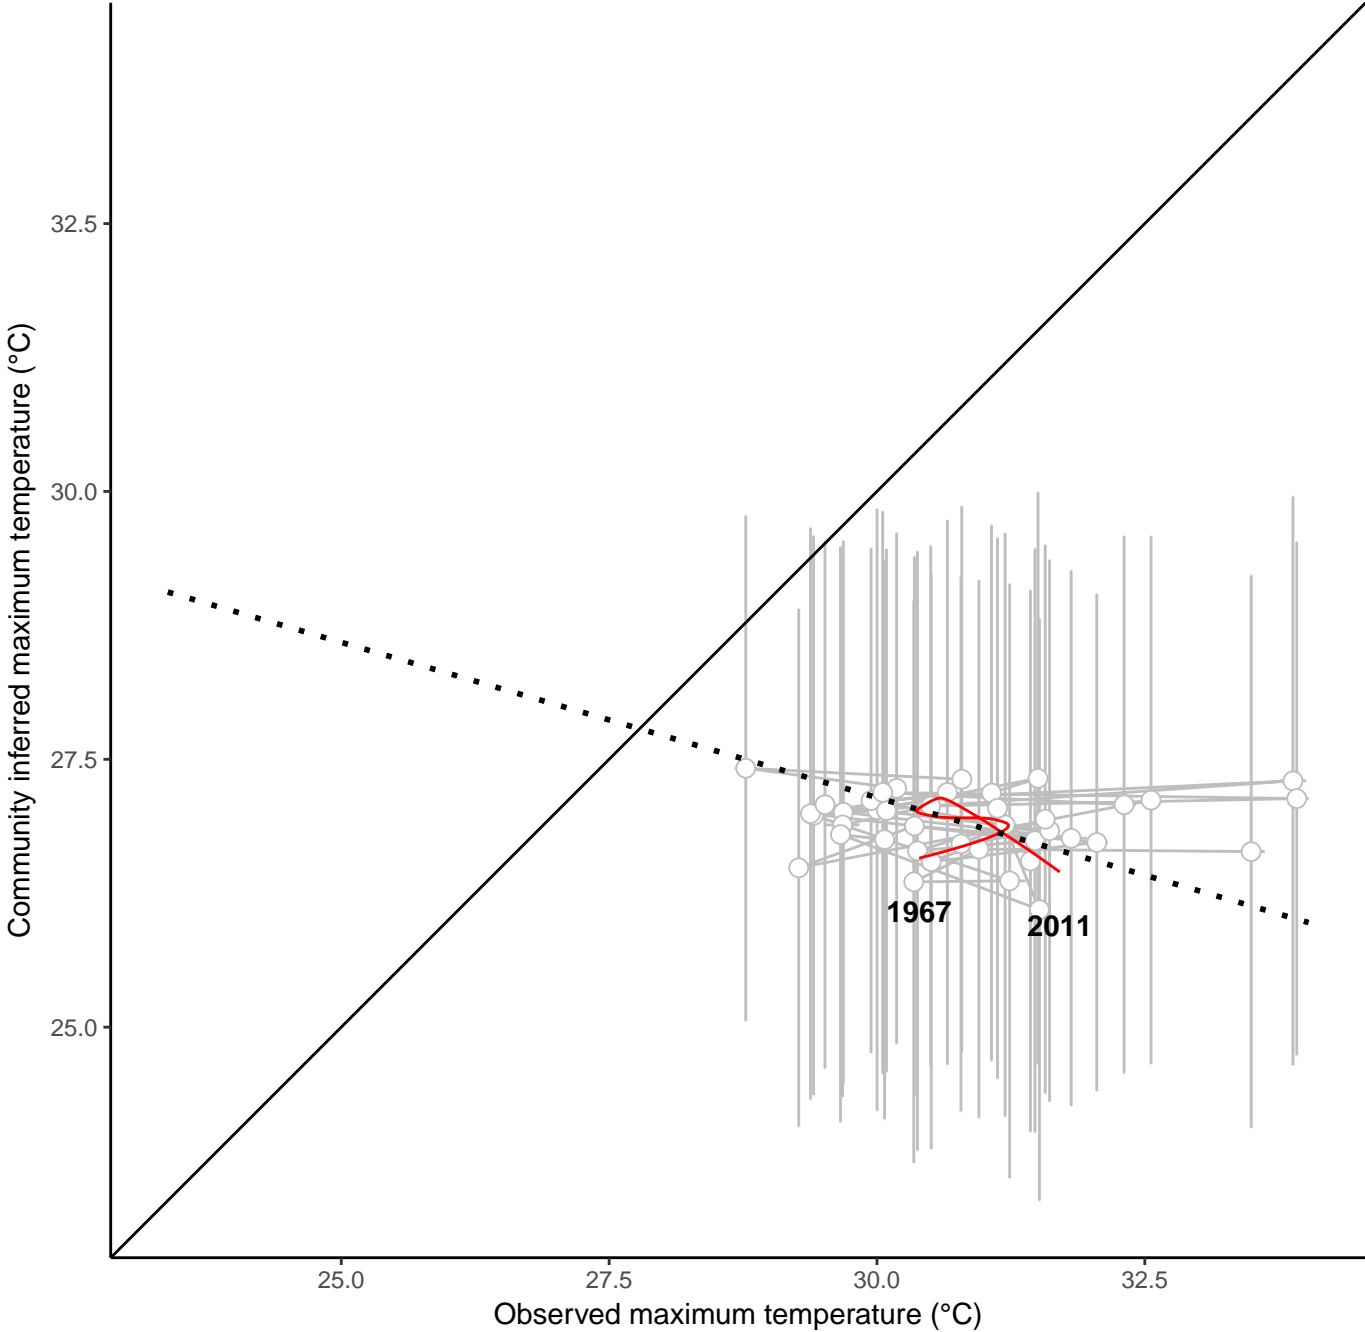

site : 840\_72\_64

absolute deviation = 1.07 | deviation change = 0.63 | maximum state number = 1

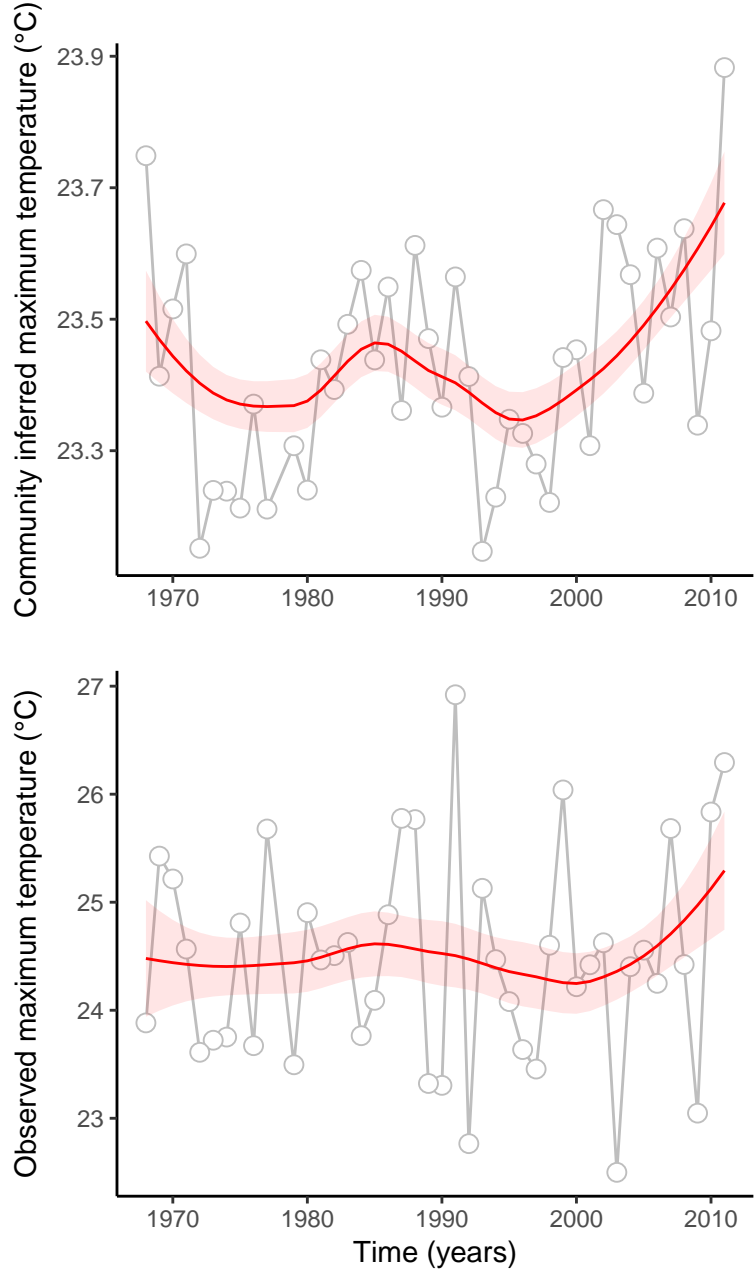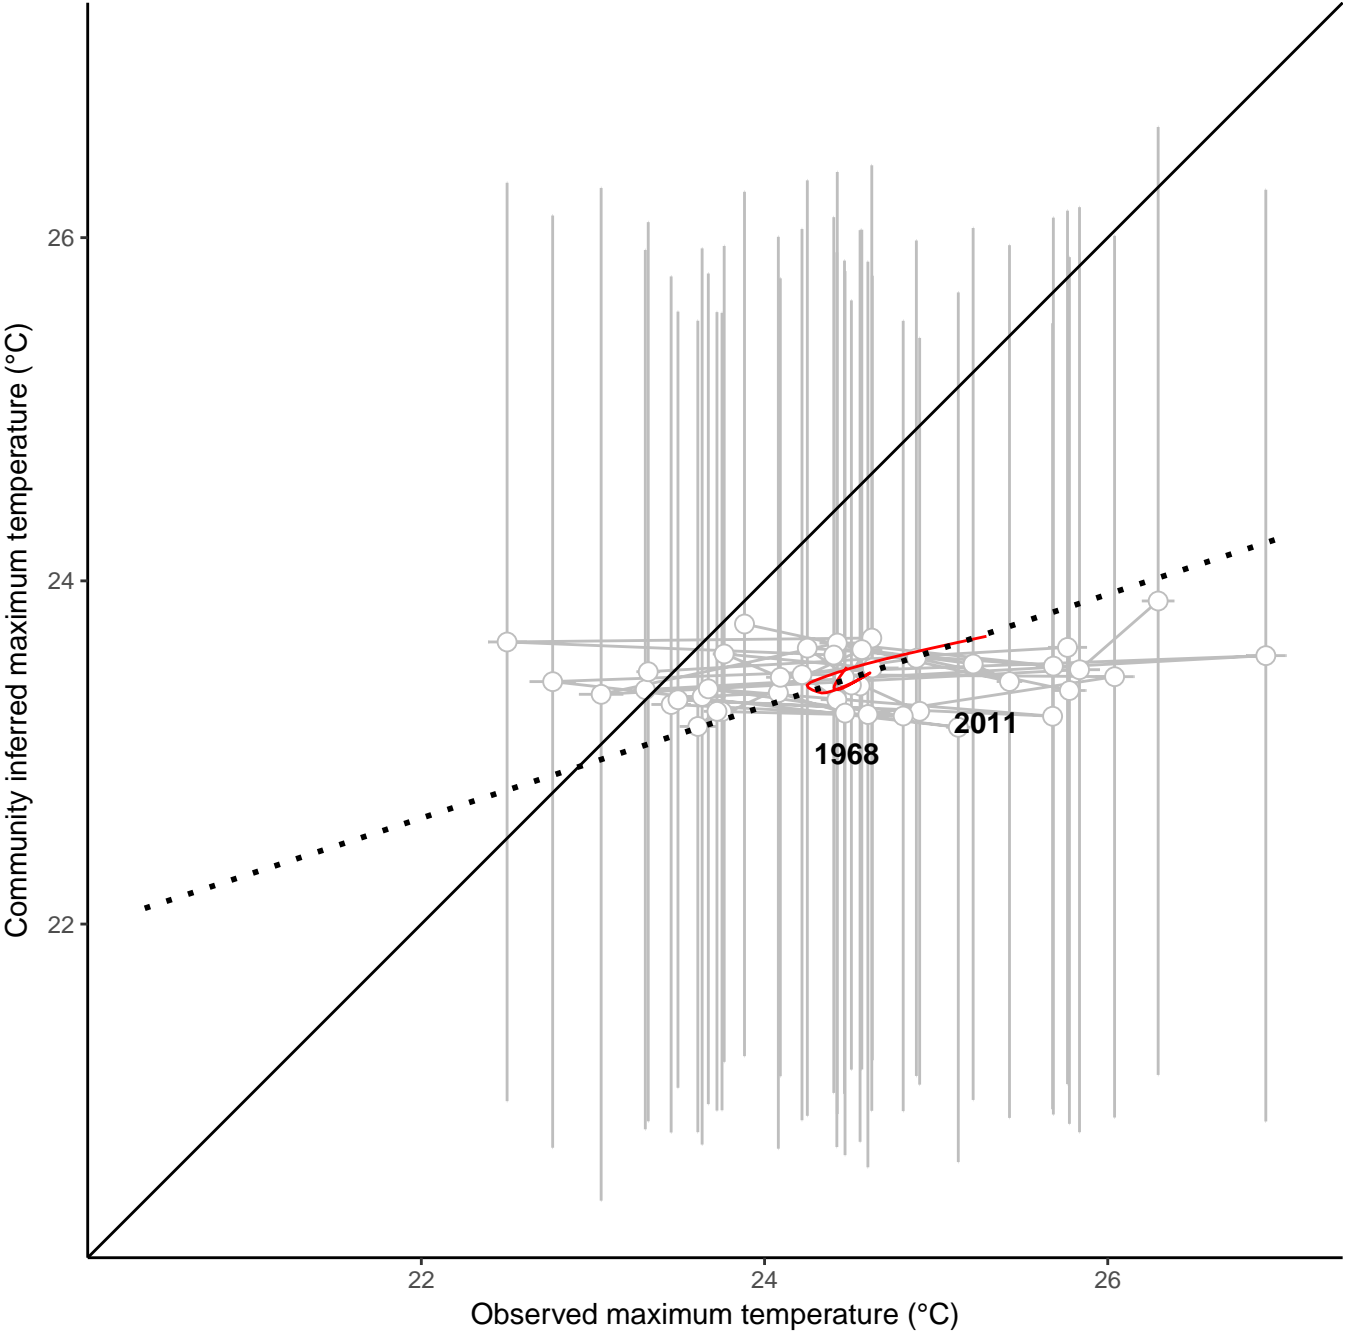

site : 840\_82\_29

absolute deviation = 3.23 | deviation change = 1.3 | maximum state number = 2

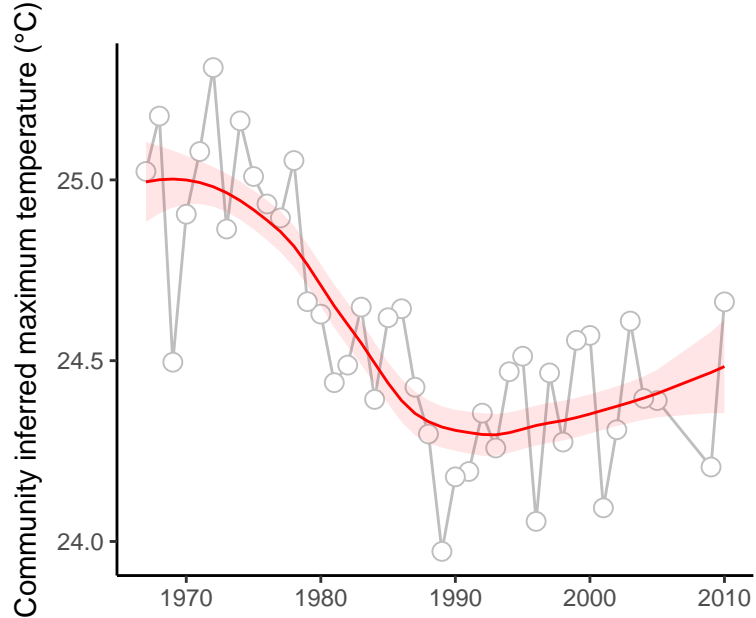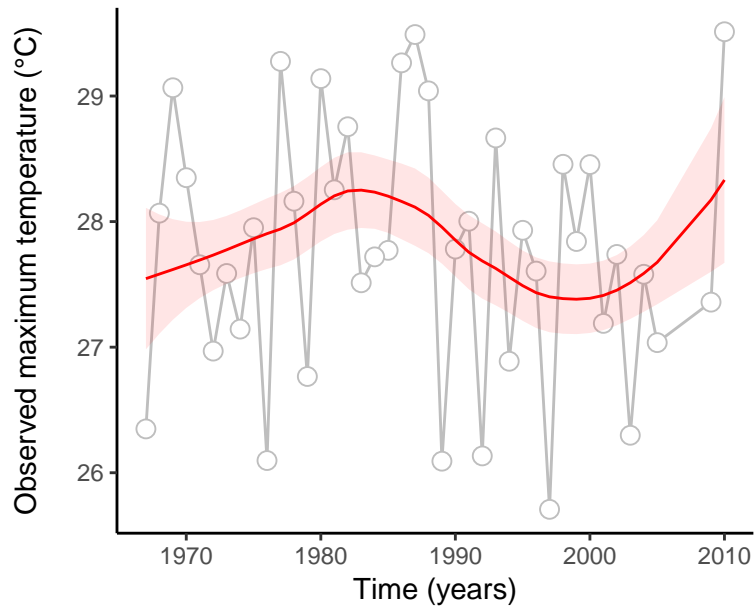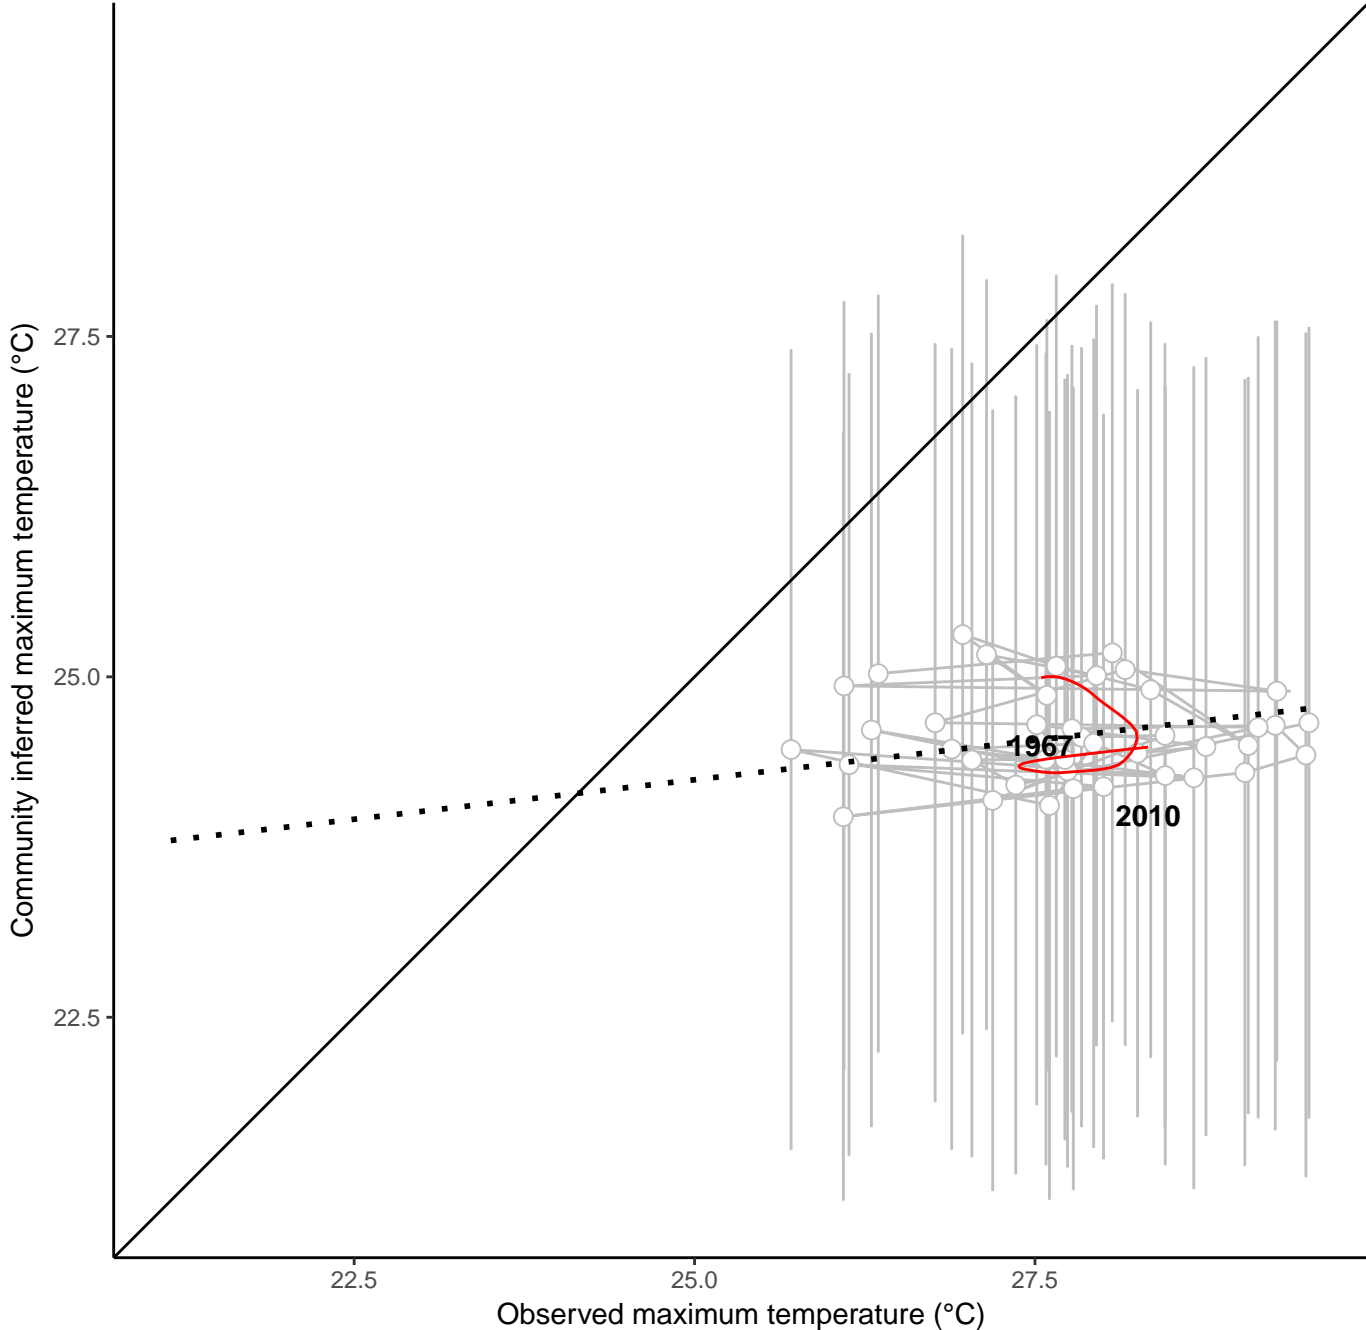

site : 840\_88\_21

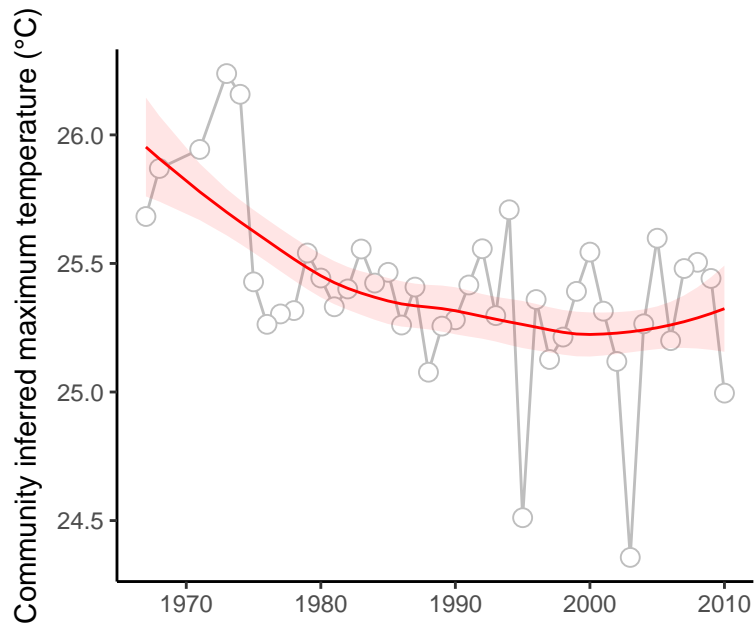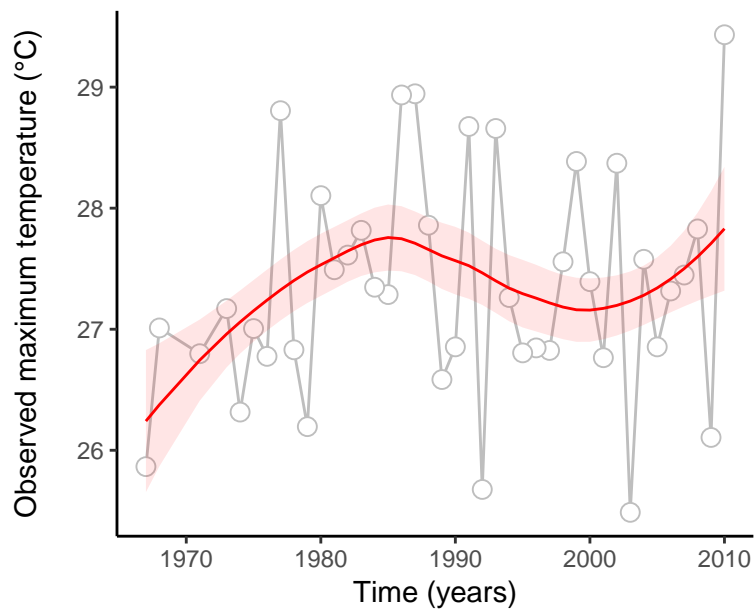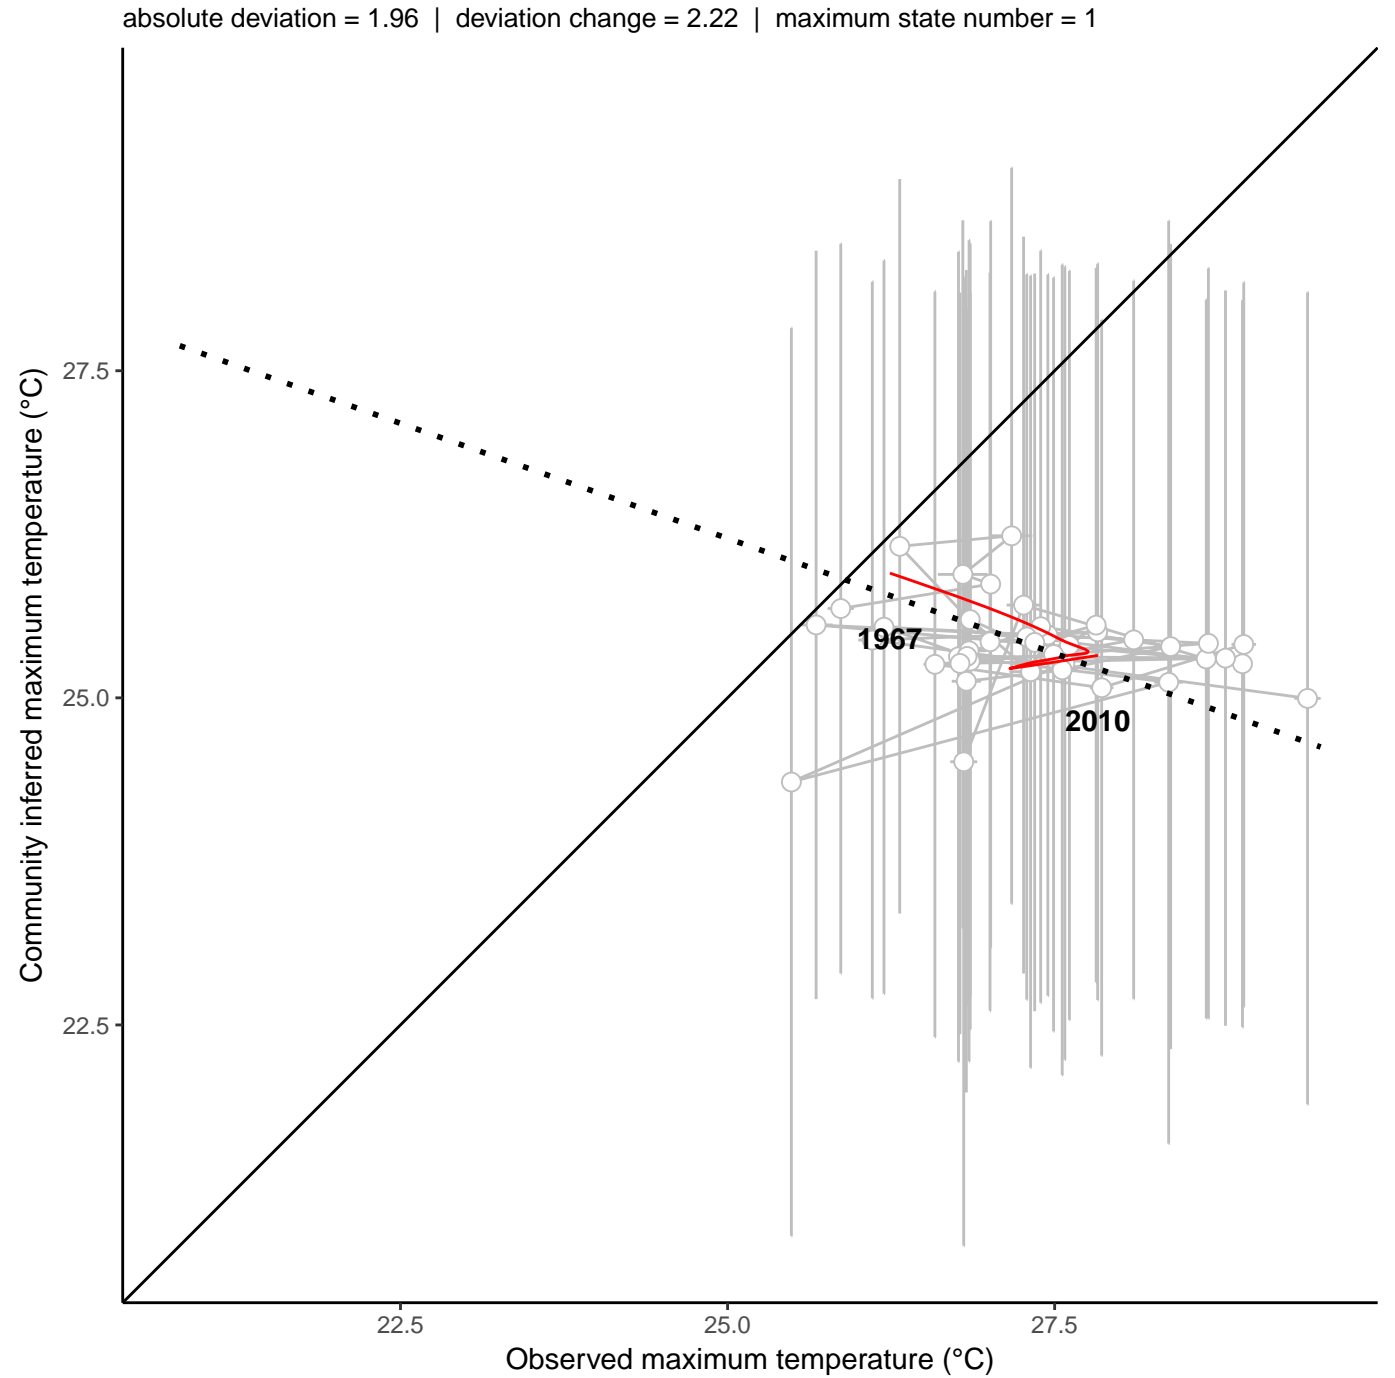

site : 840\_91\_11

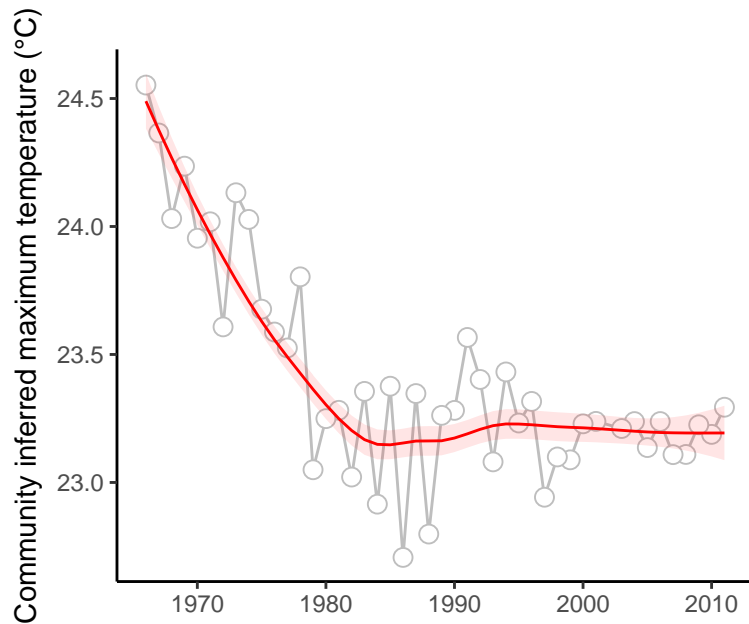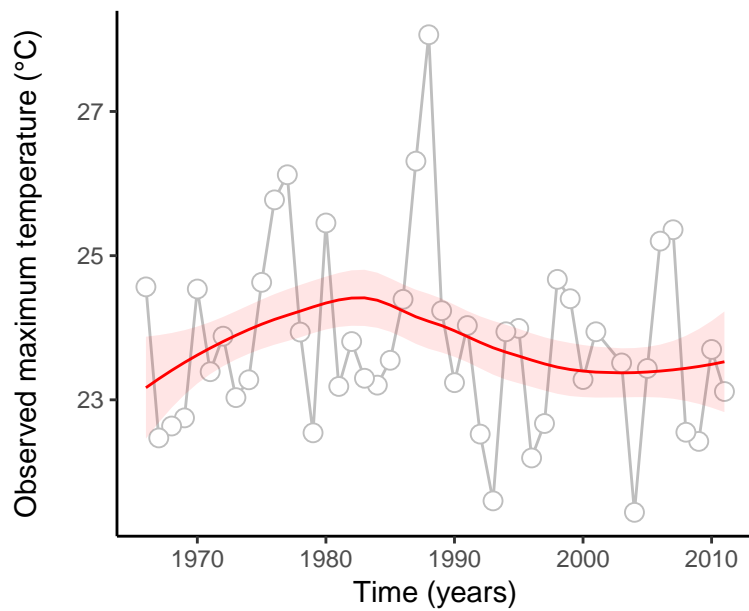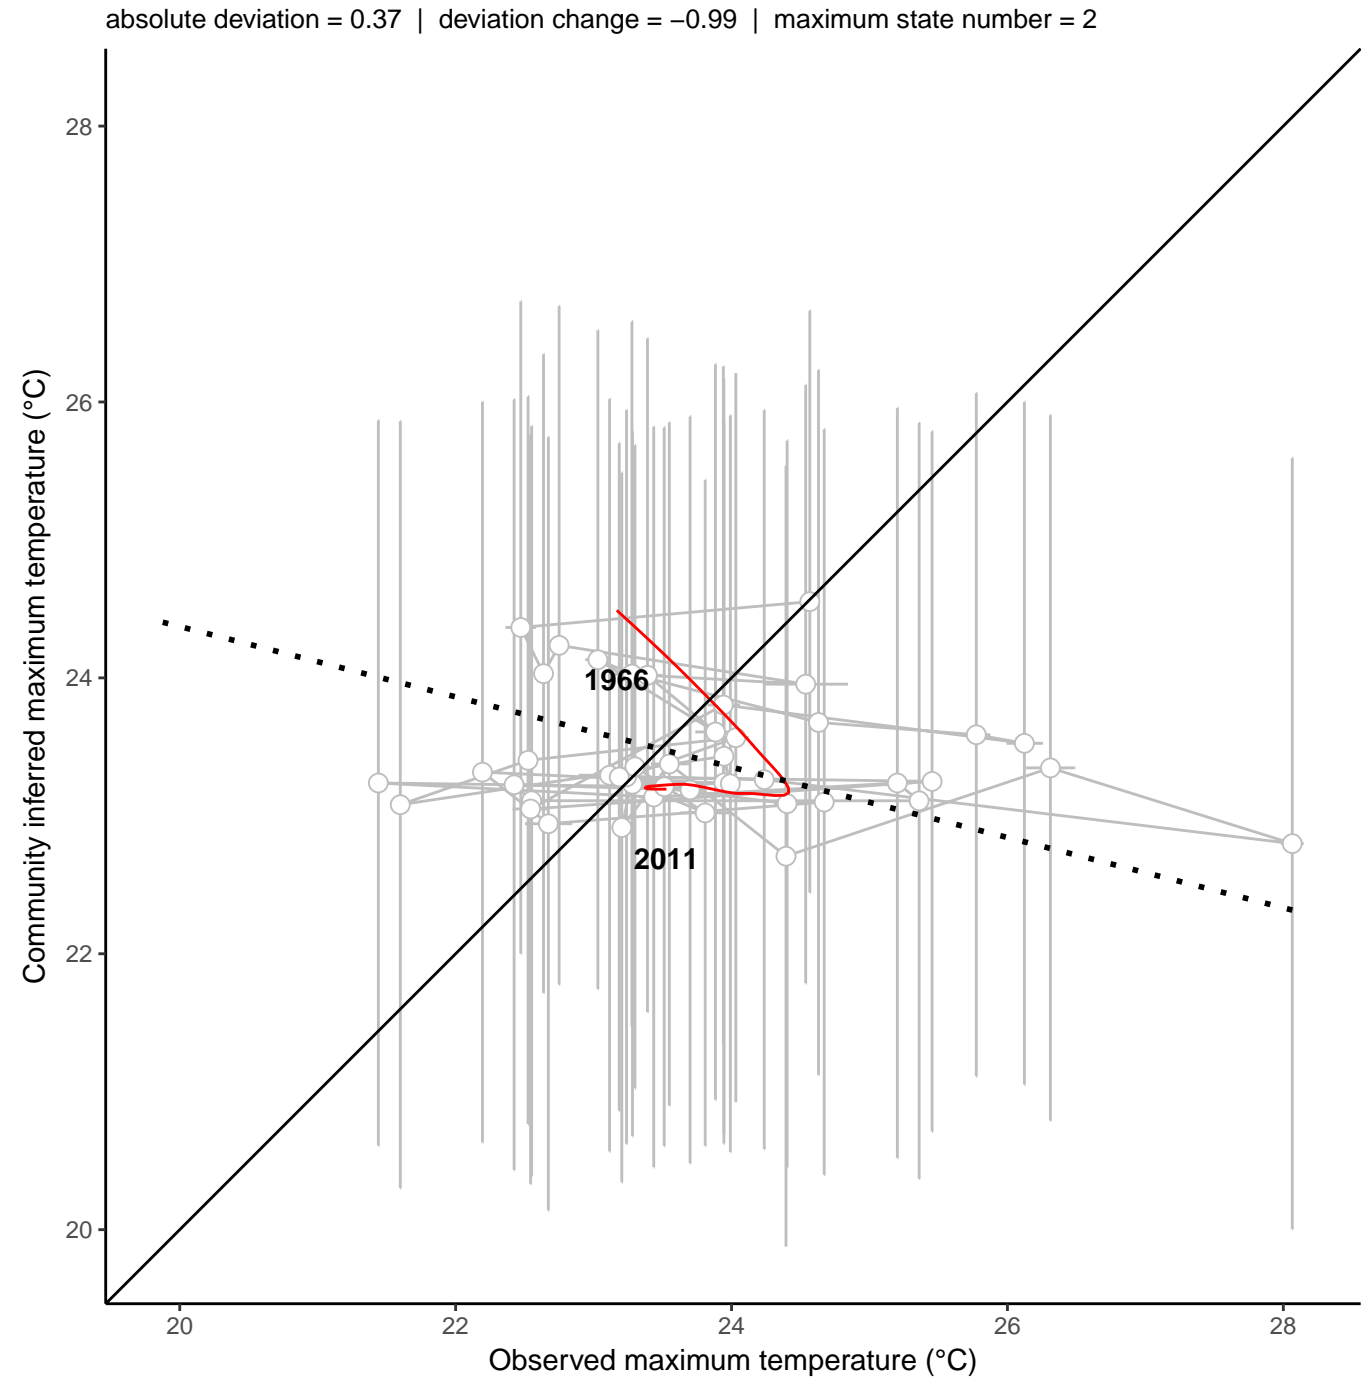

site : 840\_91\_30

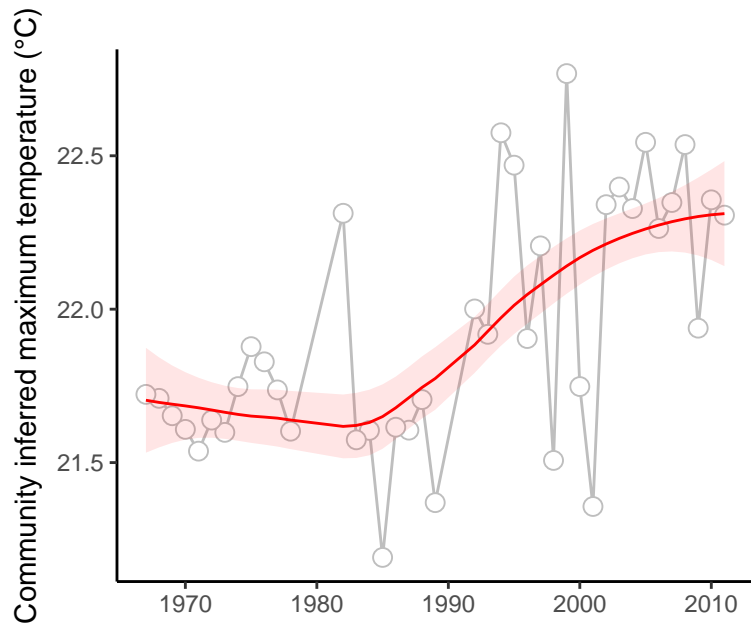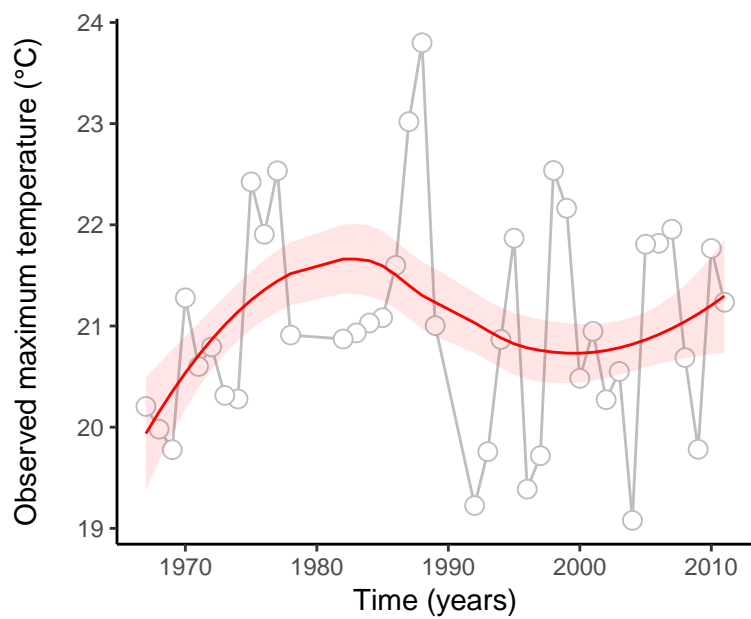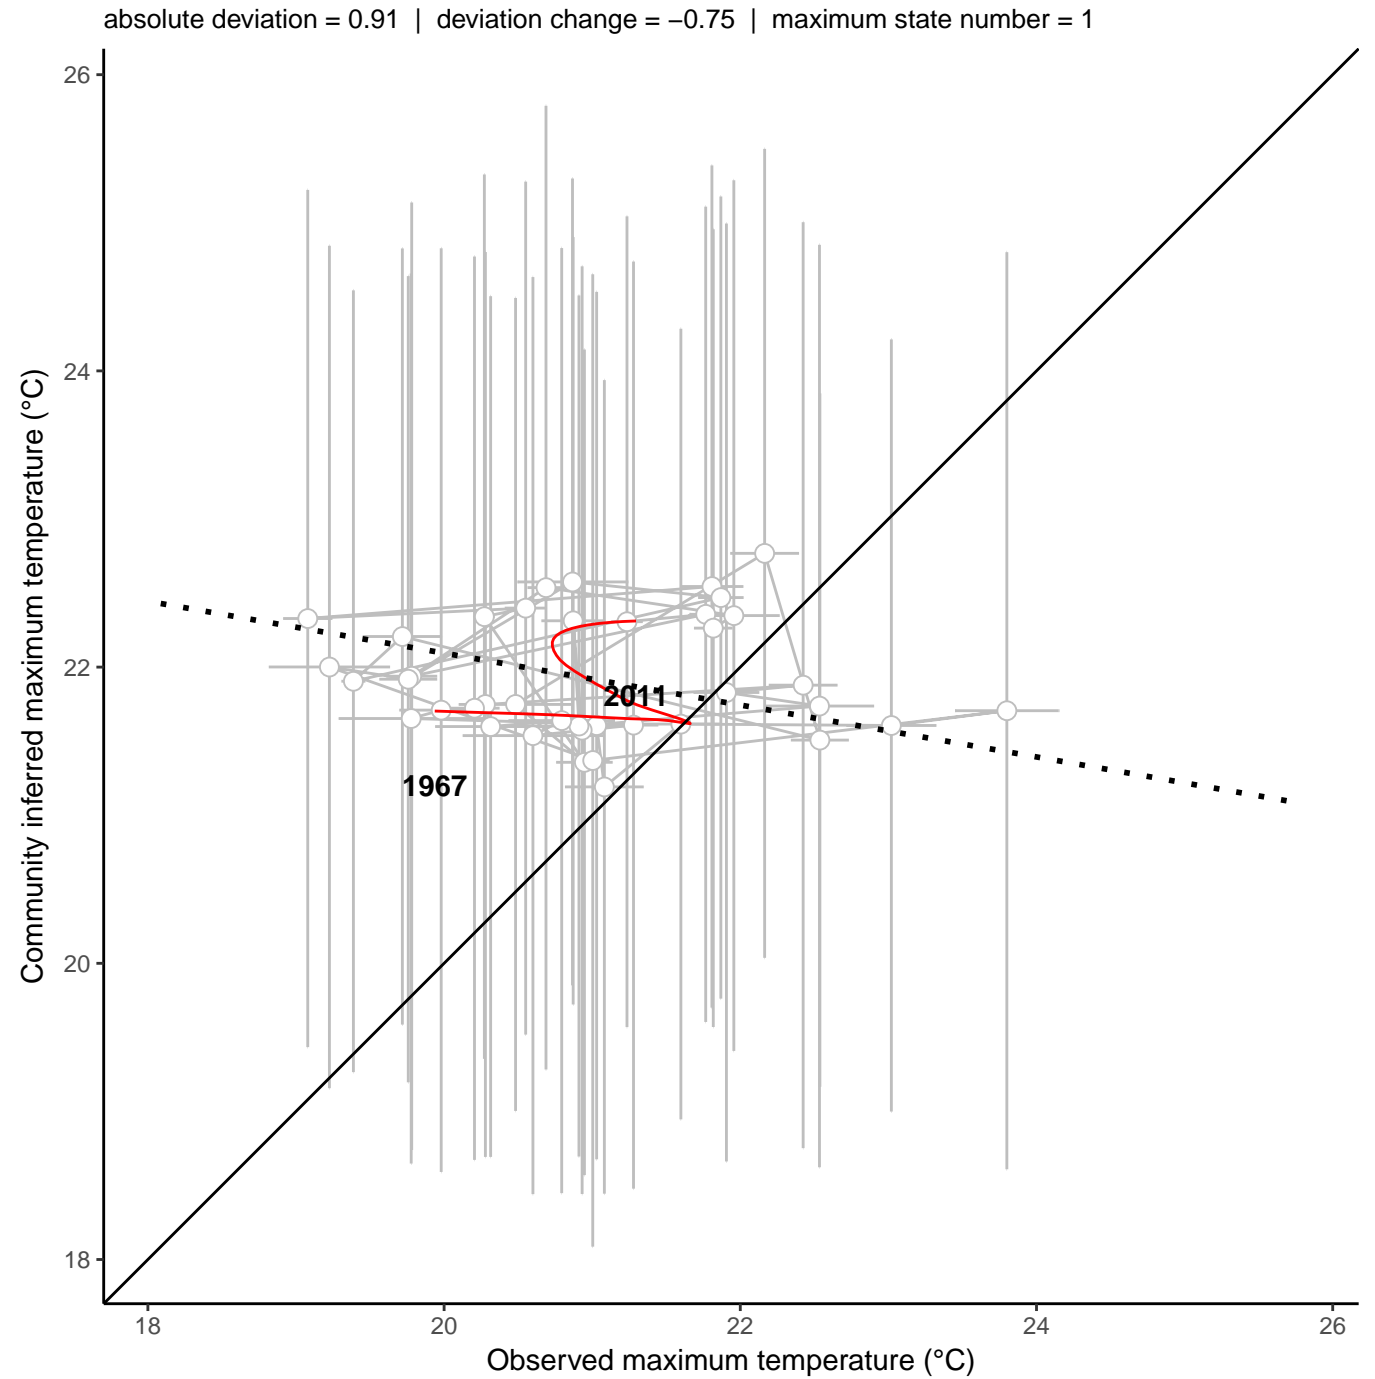



site : 840\_34\_48

absolute deviation = 3.74 | deviation change = 0.41 | maximum state number = 3

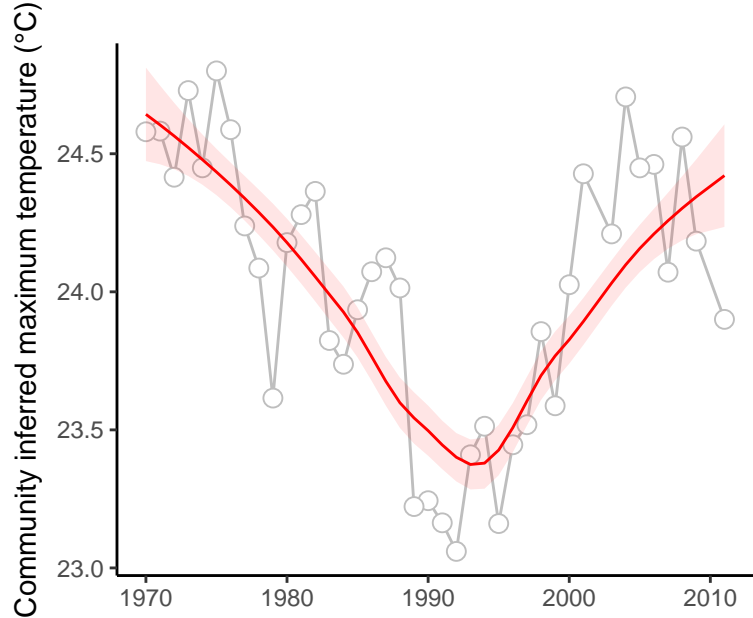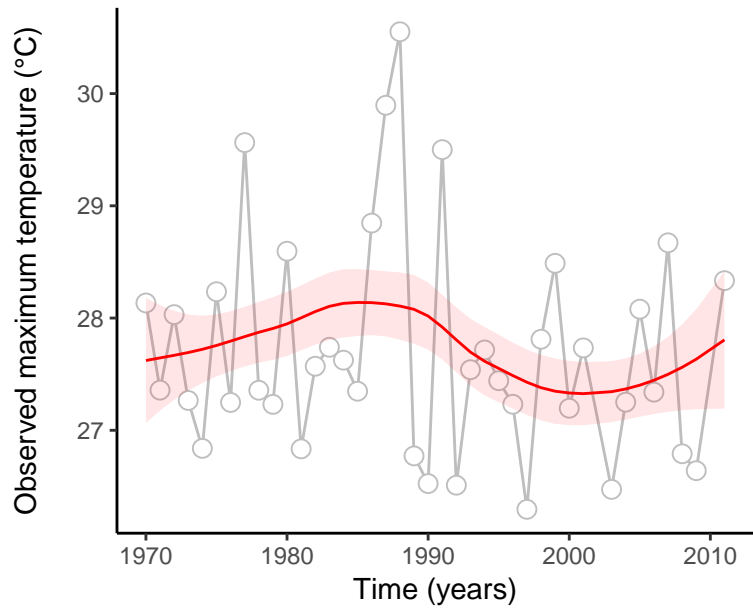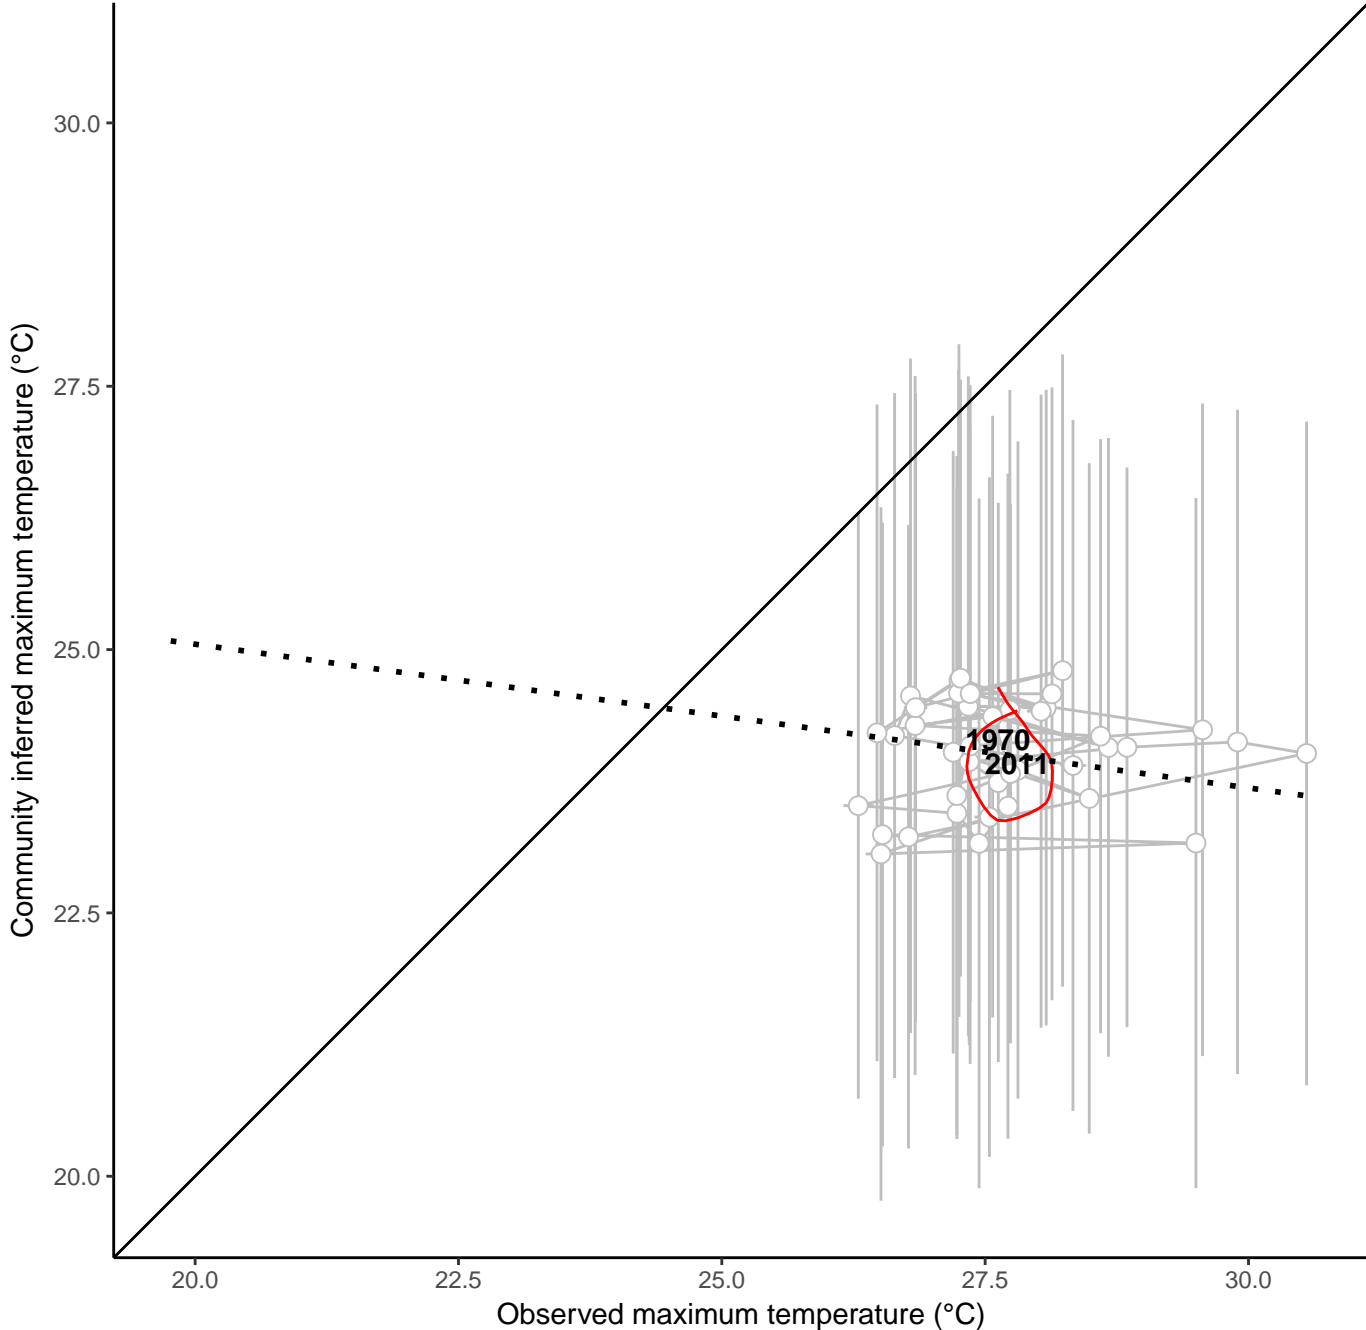

site : 840\_34\_51

absolute deviation = 3.76 | deviation change = 2.25 | maximum state number = 2

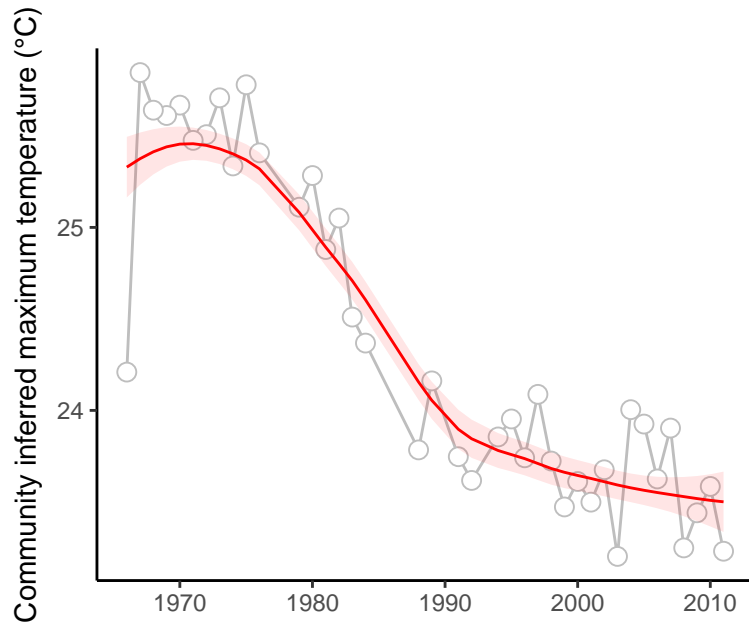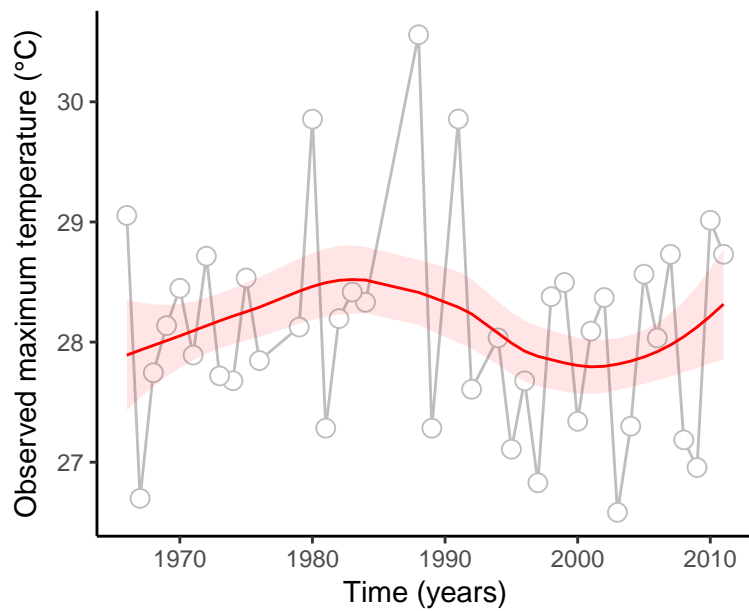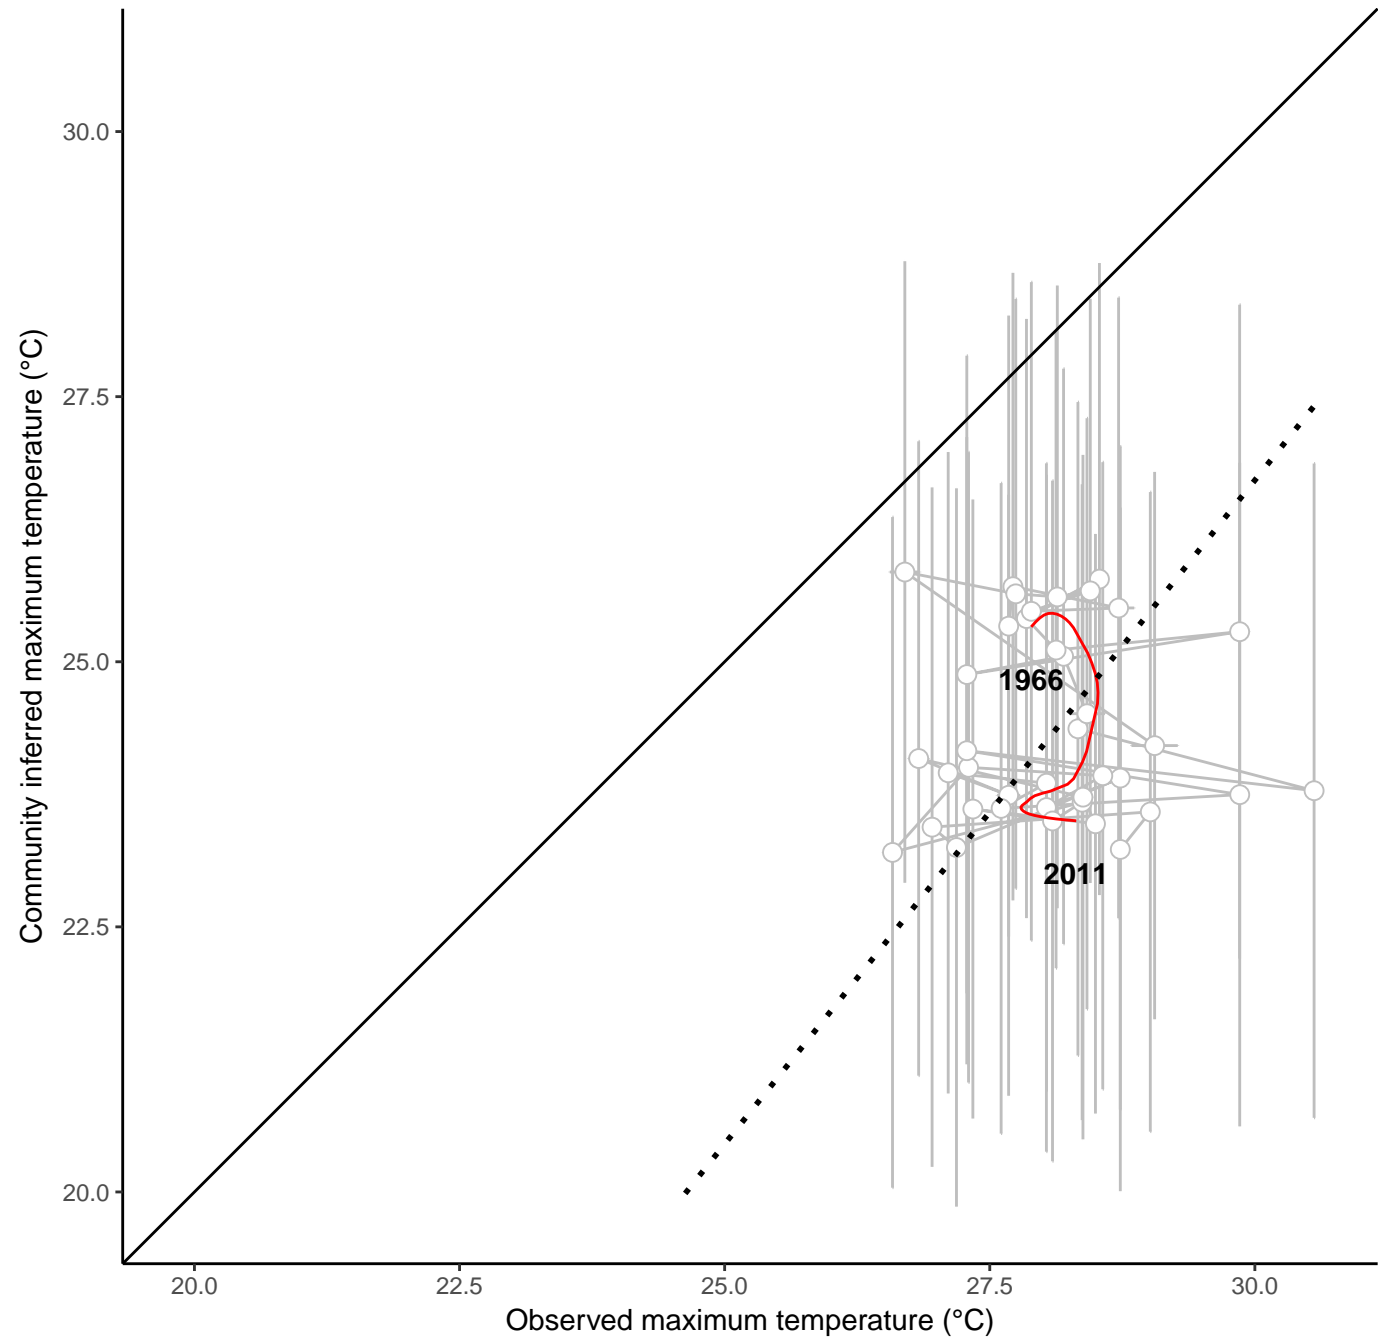

site : 840\_35\_10

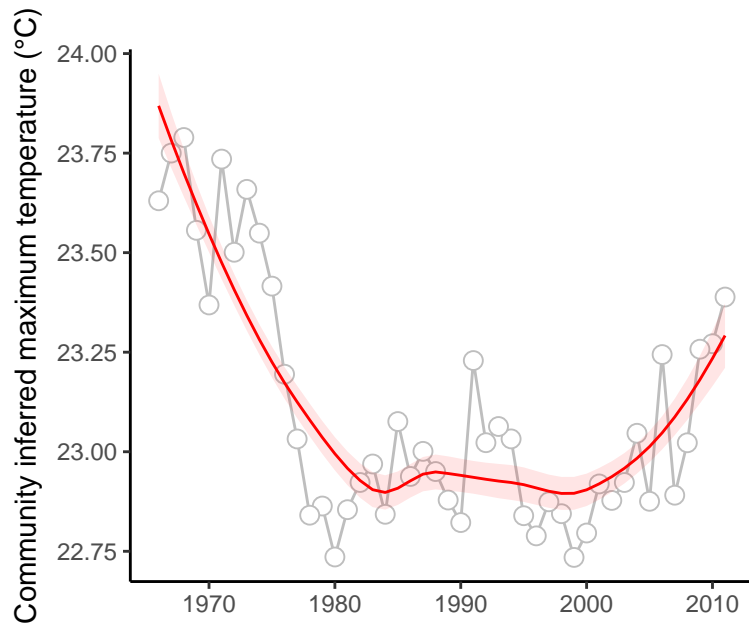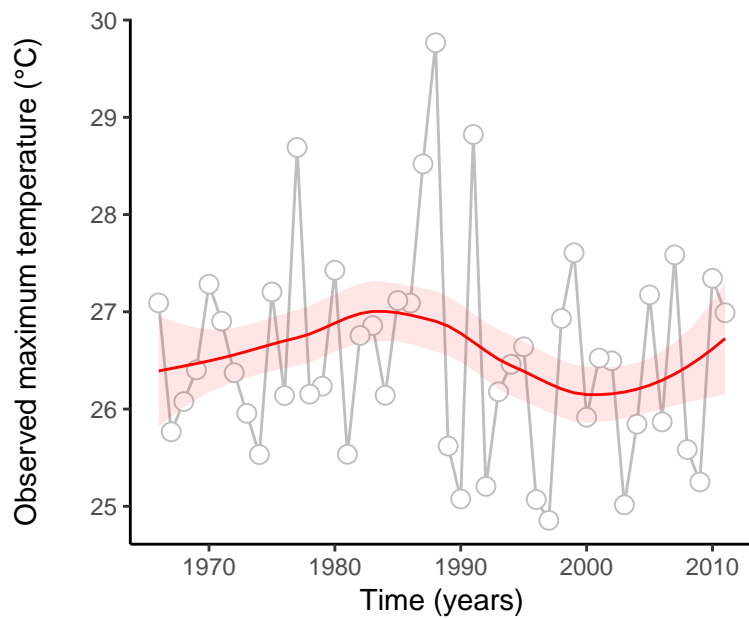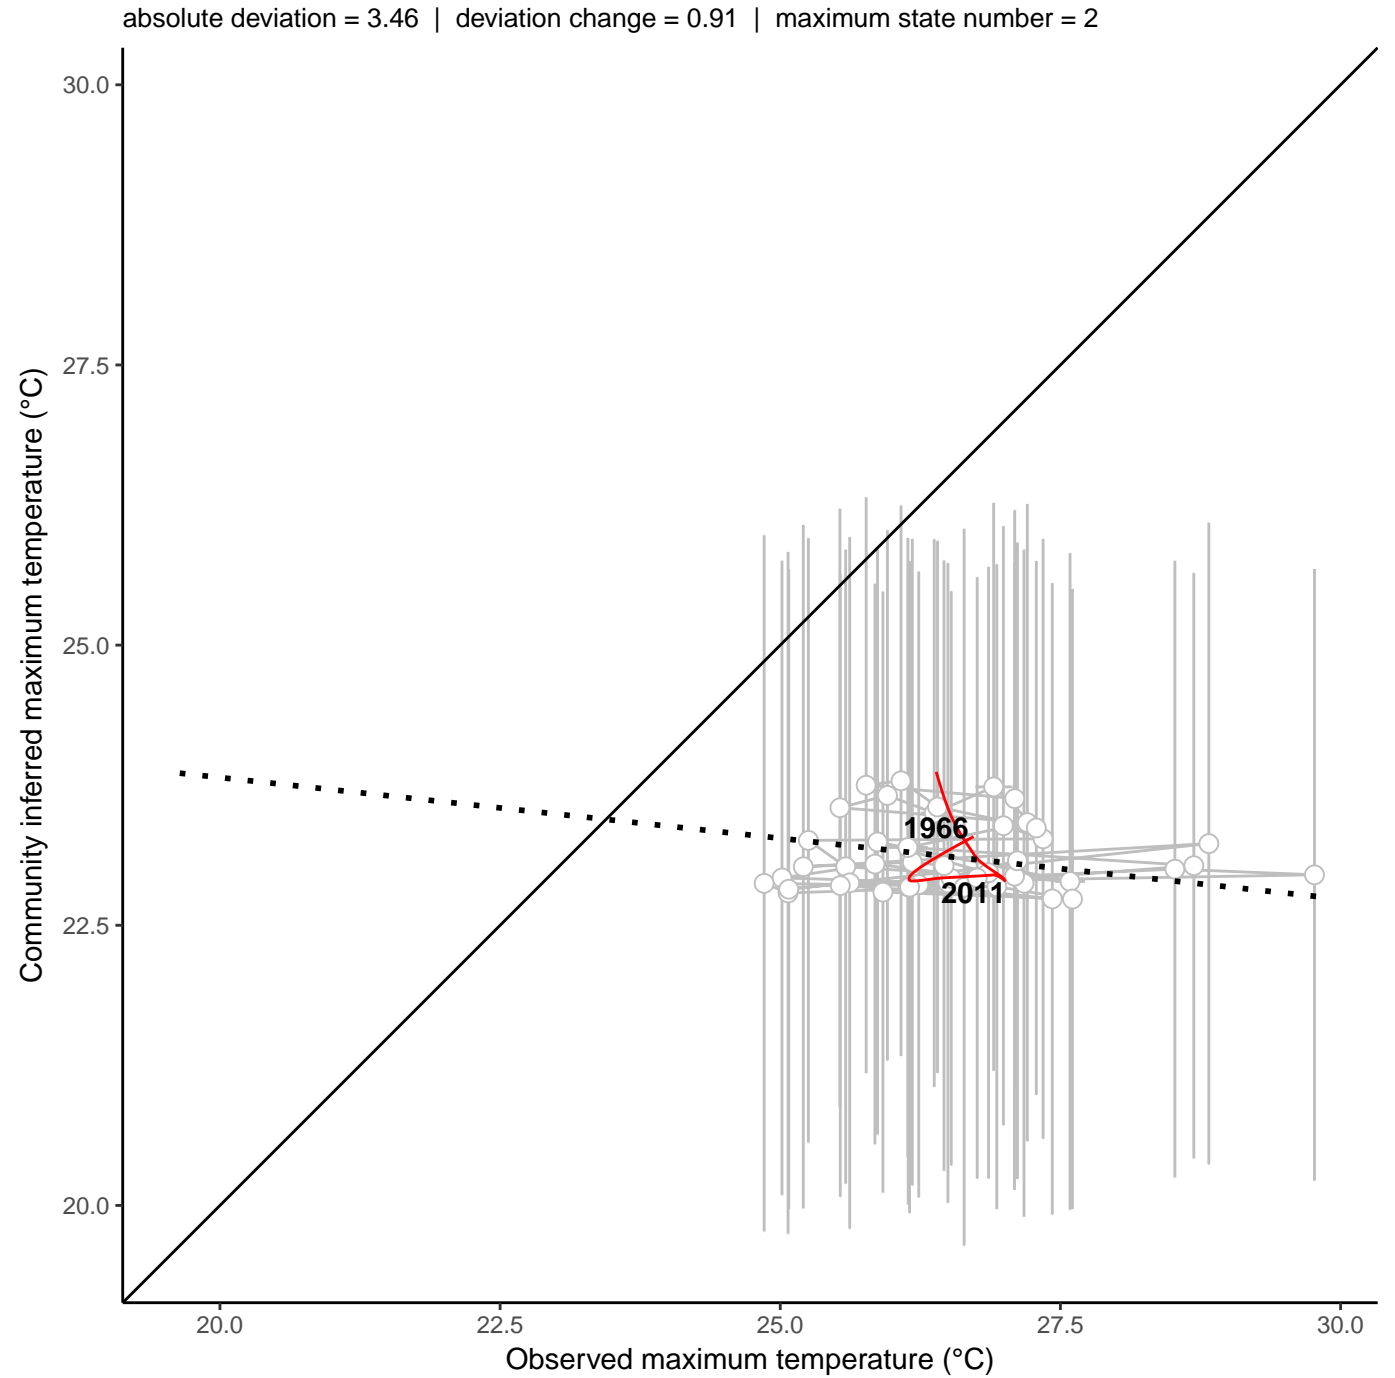

site : 840\_38\_1

absolute deviation = 3.24 | deviation change = 0.43 | maximum state number = 1

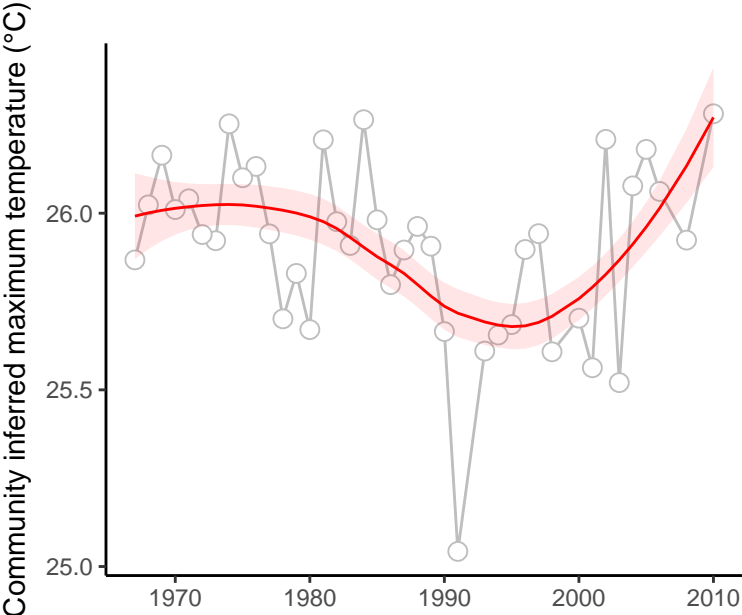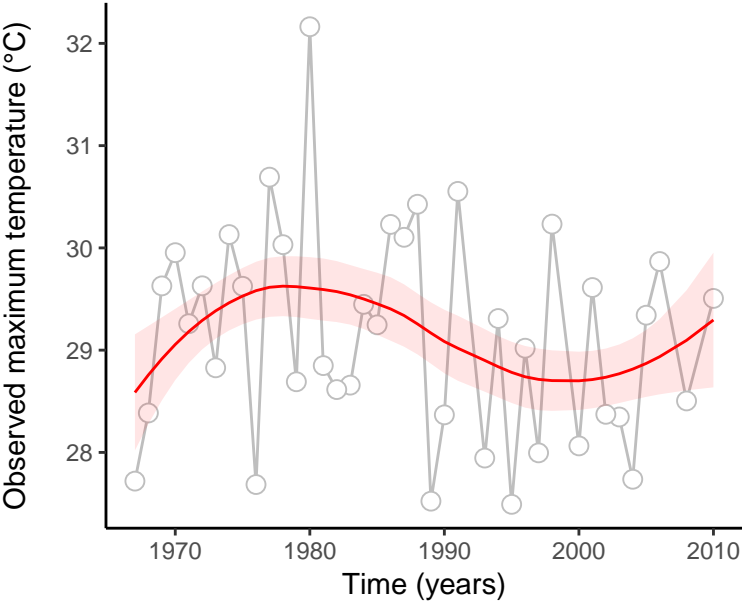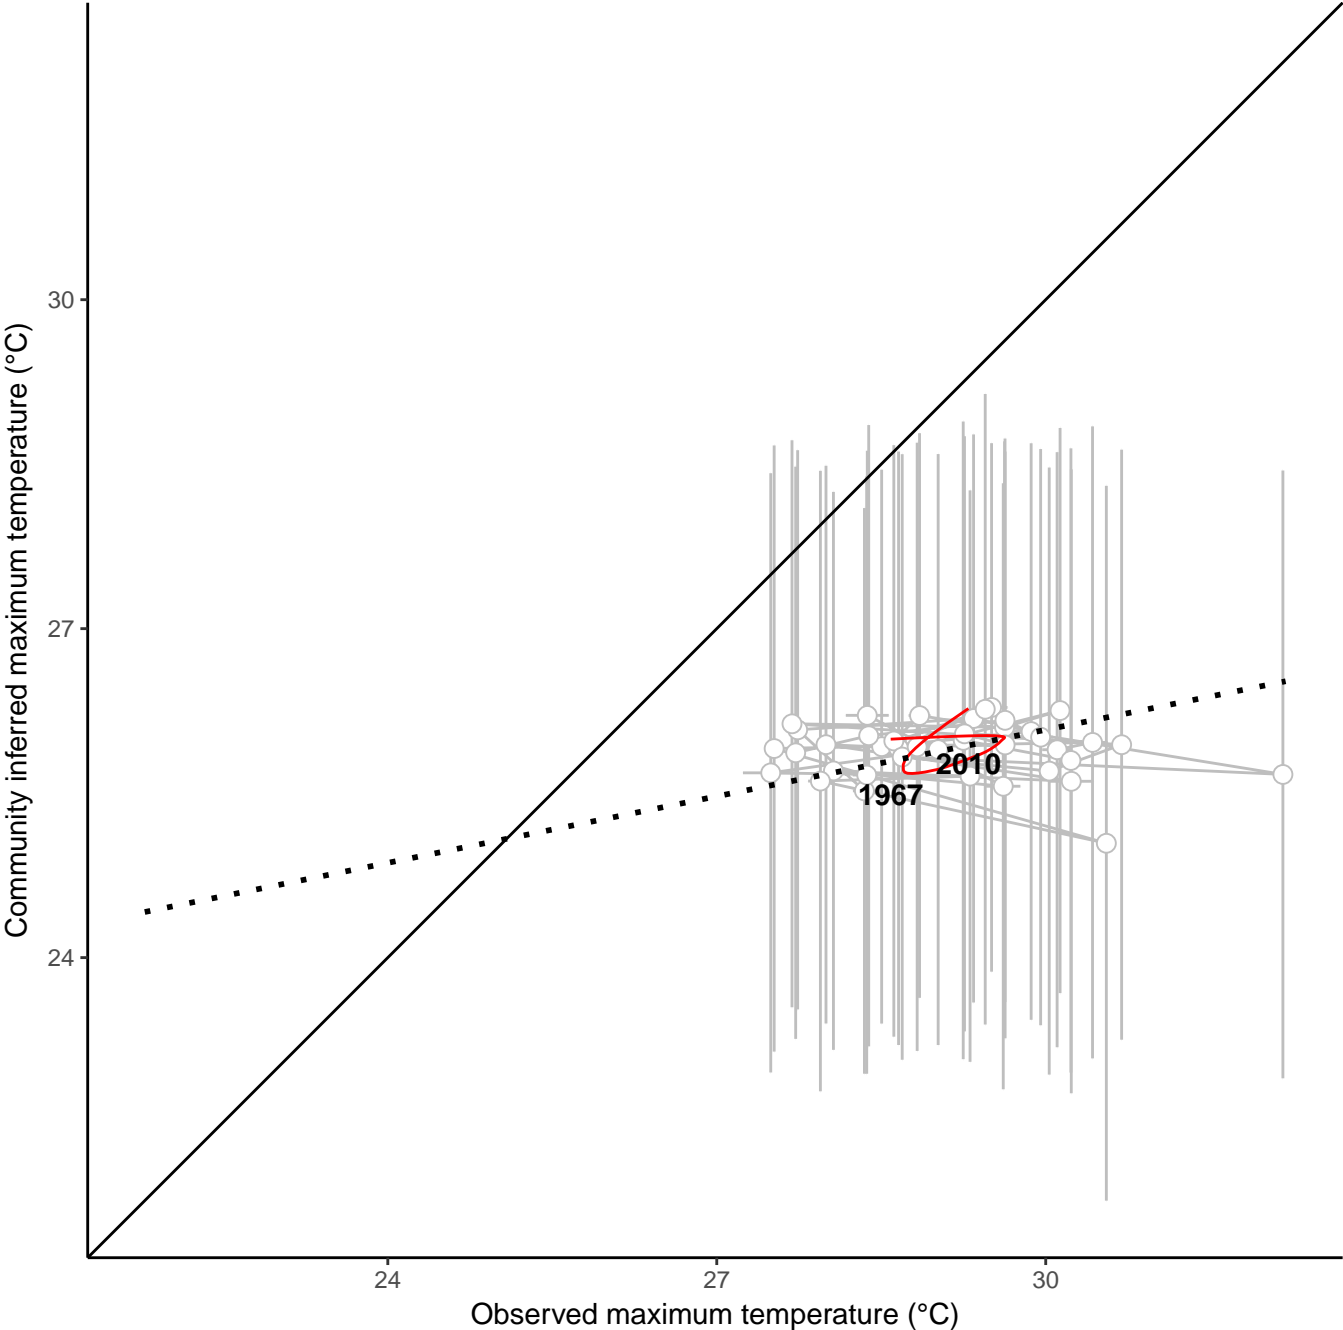

site : 840\_38\_13

absolute deviation = 3.13 | deviation change = 0.55 | maximum state number = 1

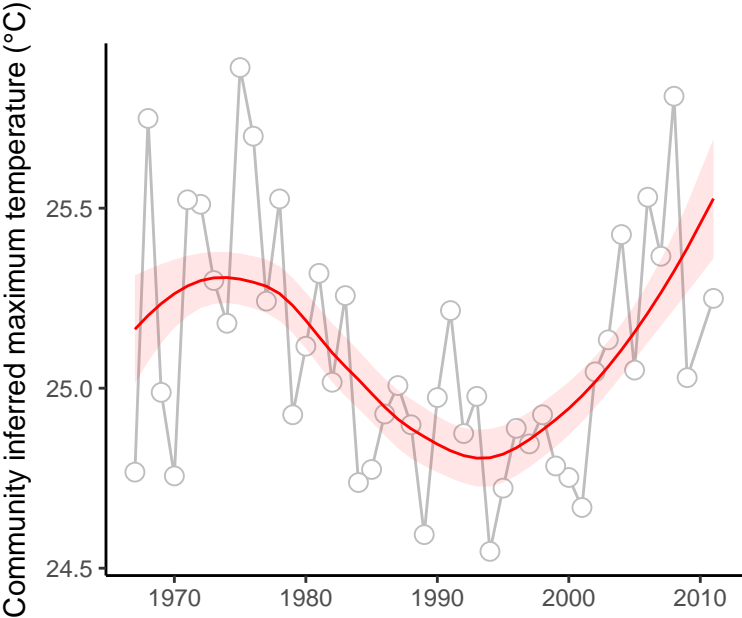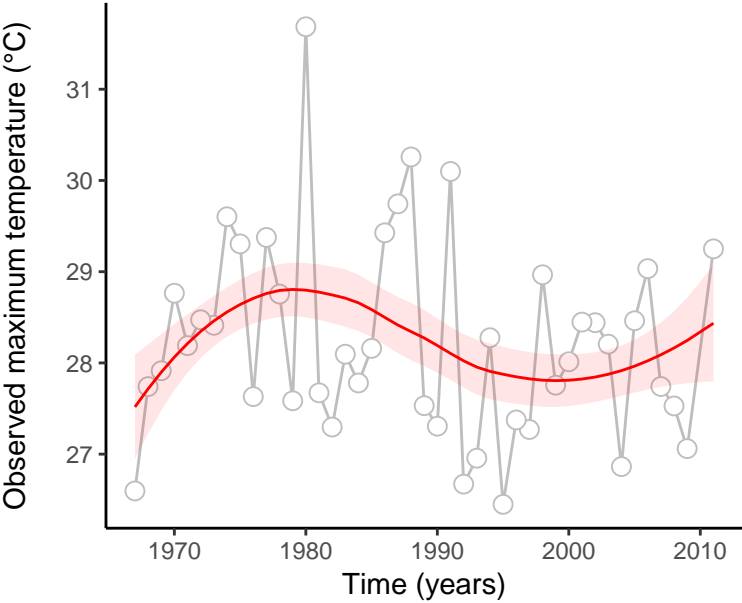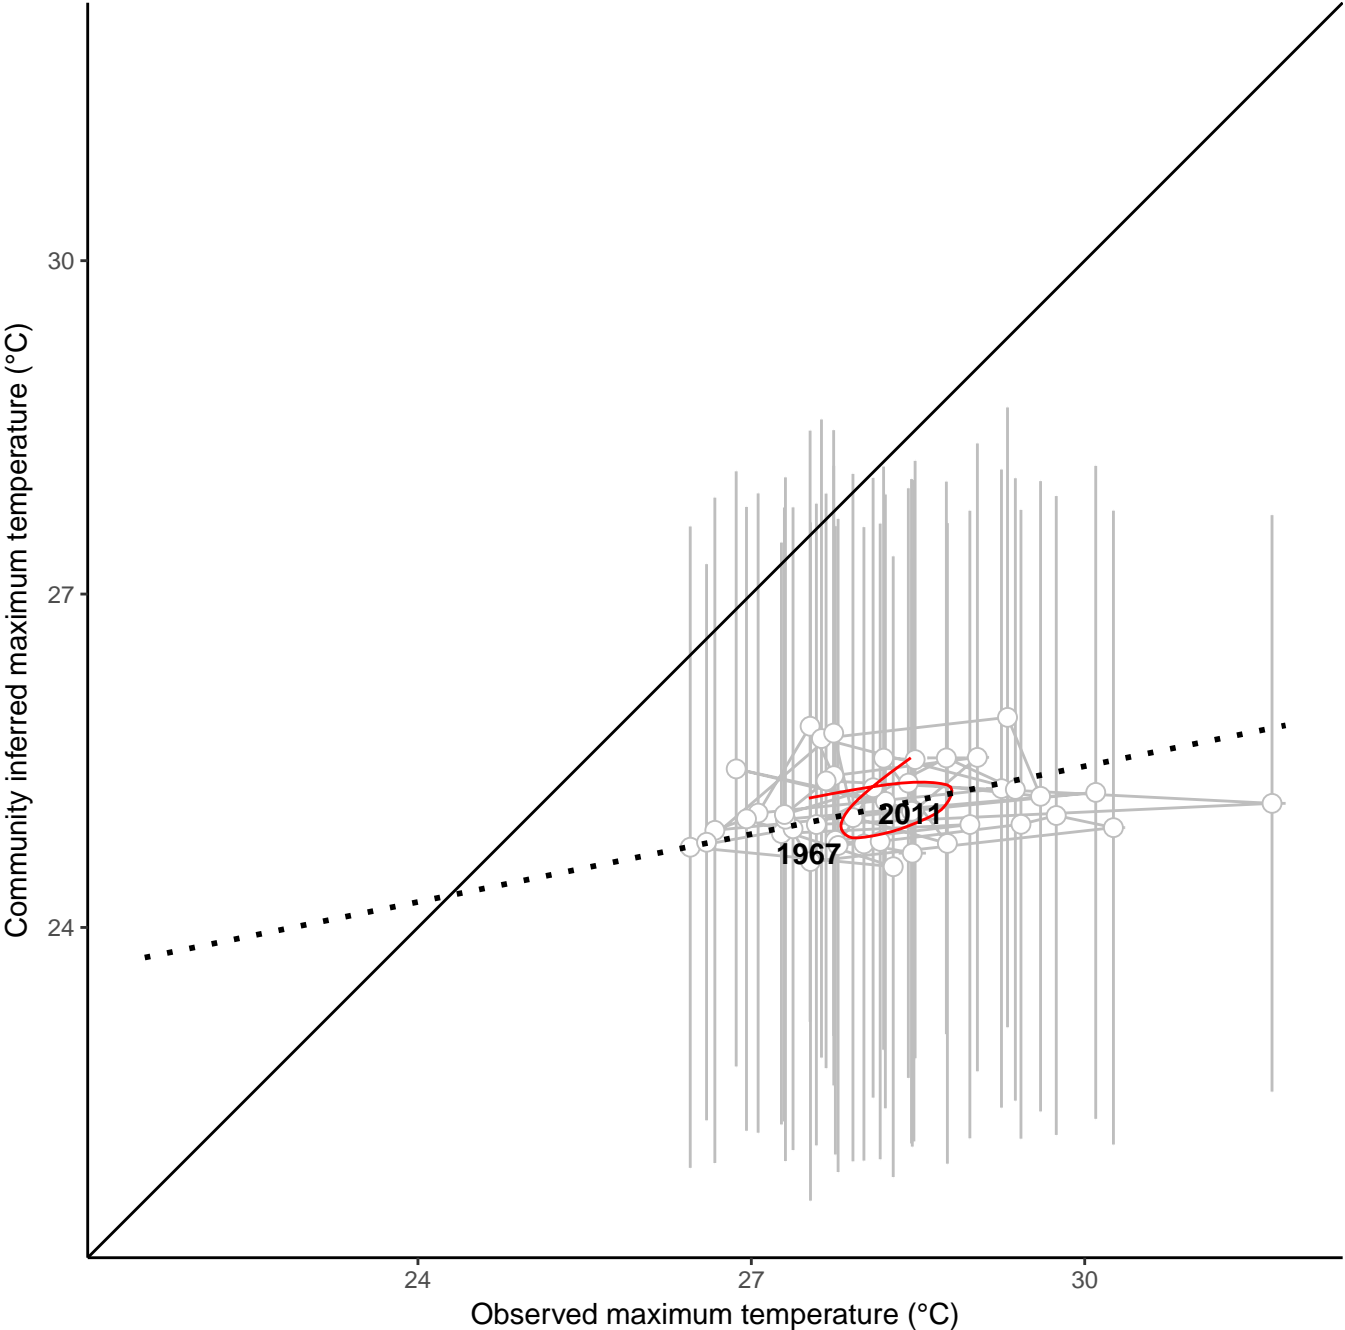

site : 840\_58\_19

absolute deviation = 0.92 | deviation change = -0.48 | maximum state number = 1

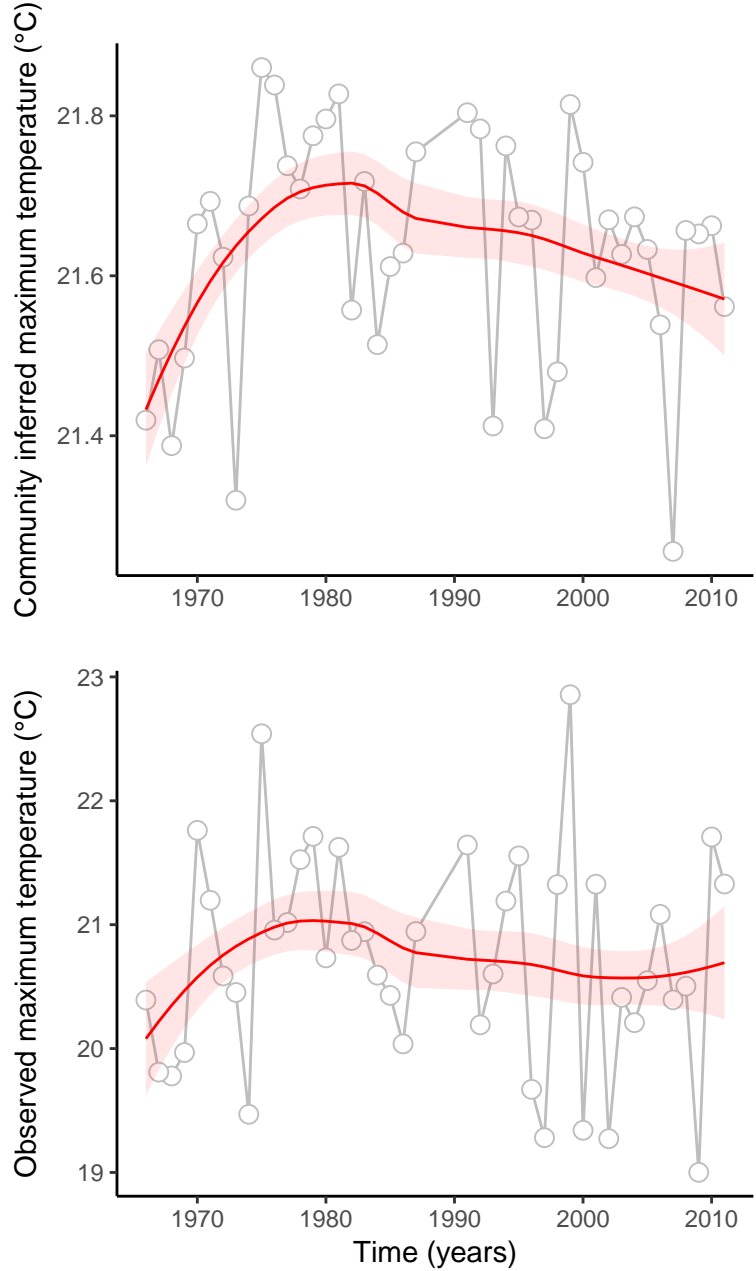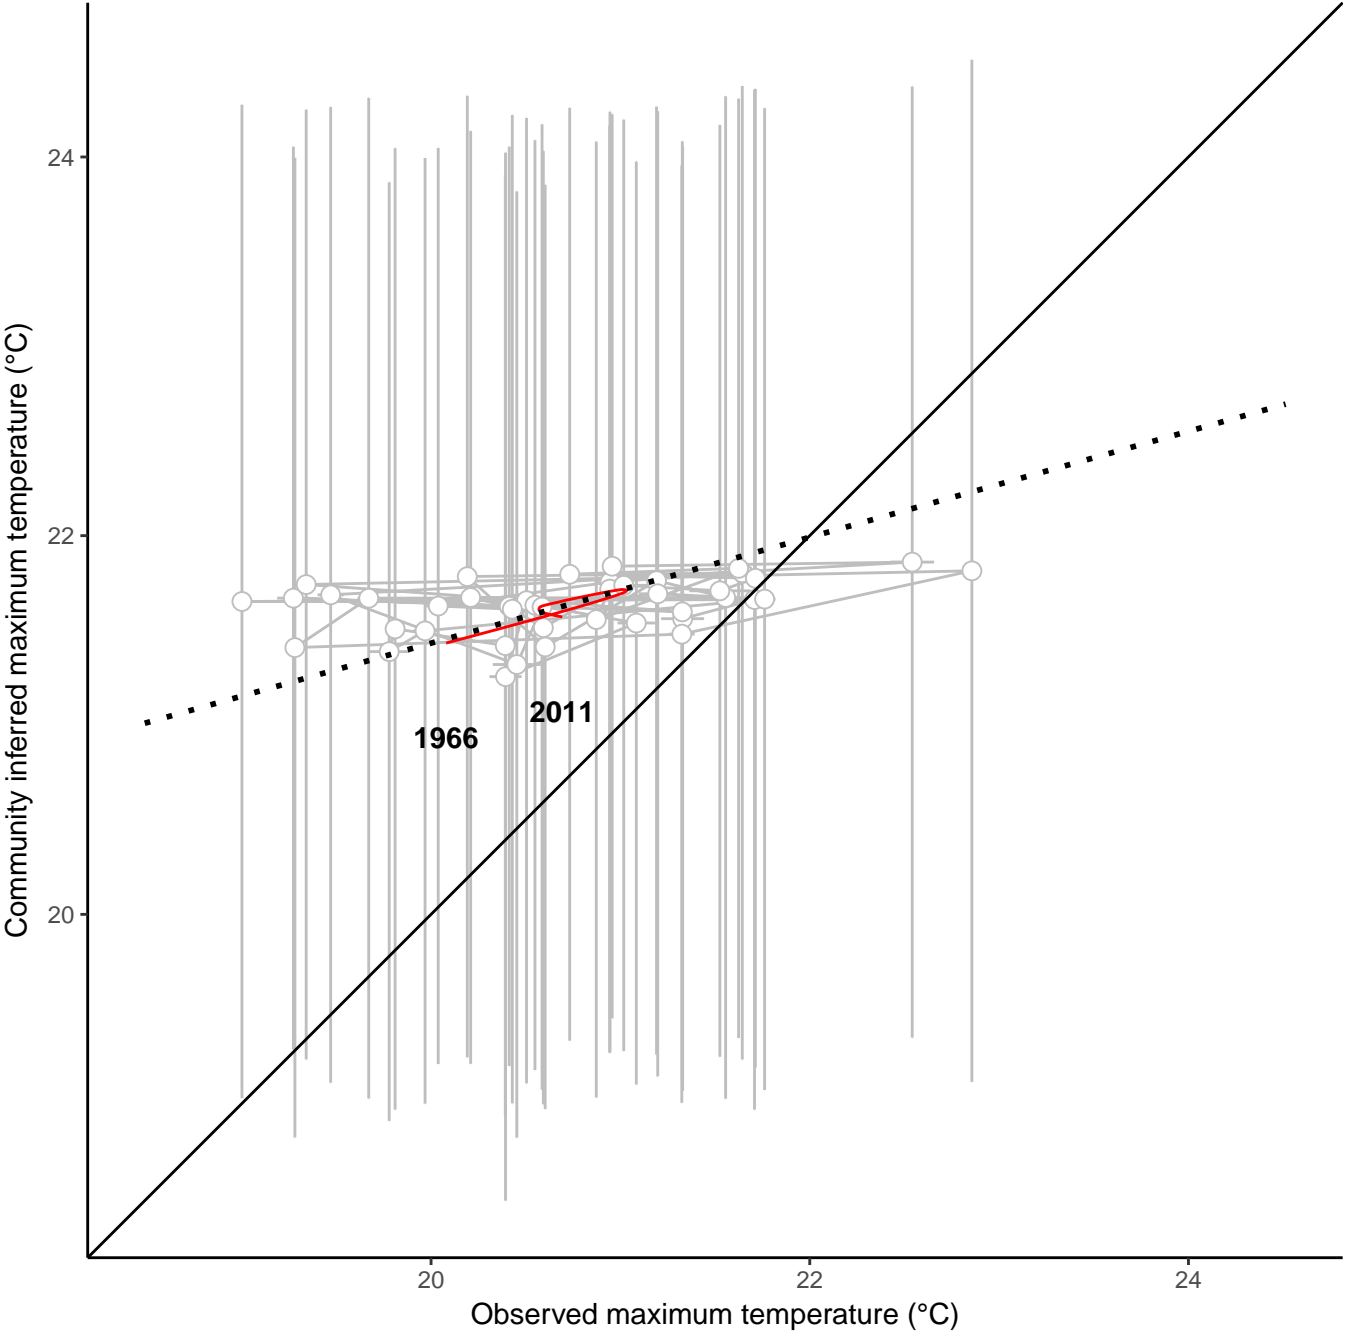

site : 840\_61\_50

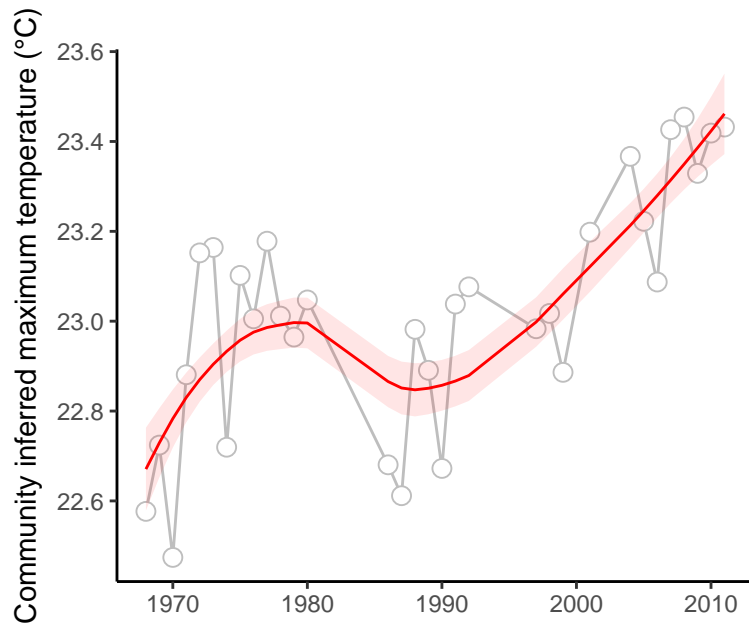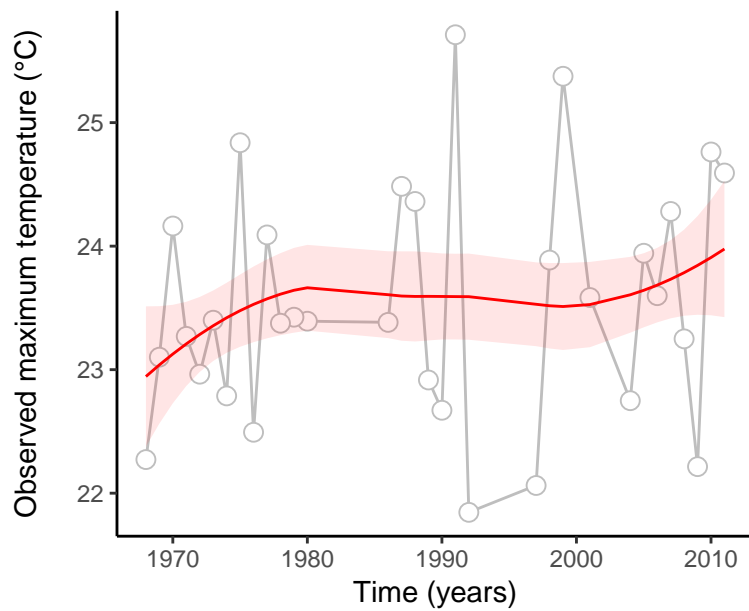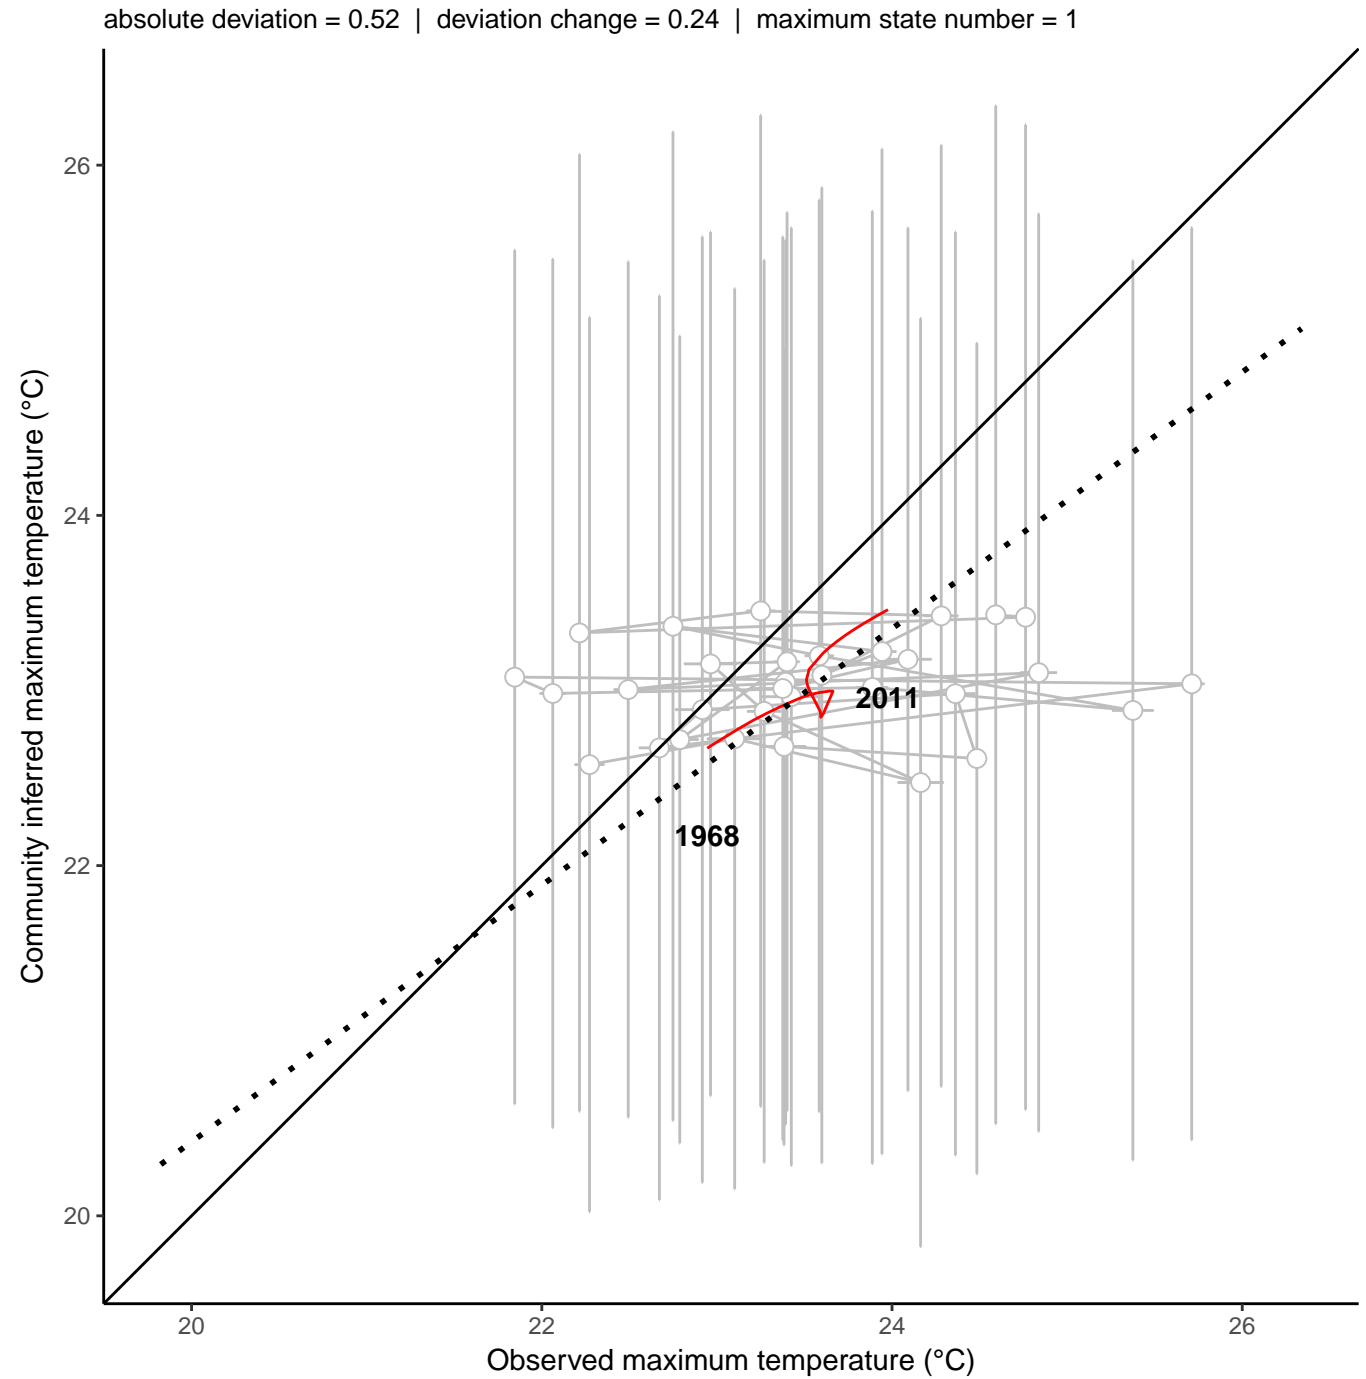

site : 840\_61\_84

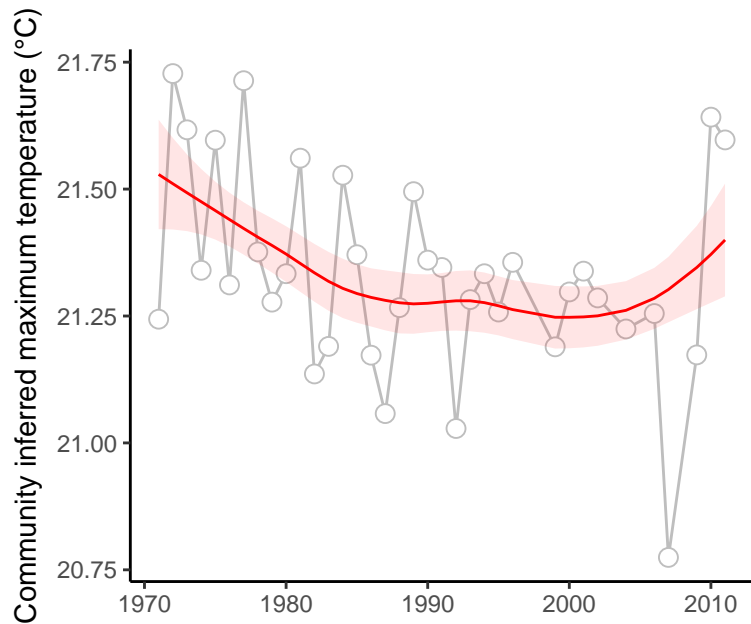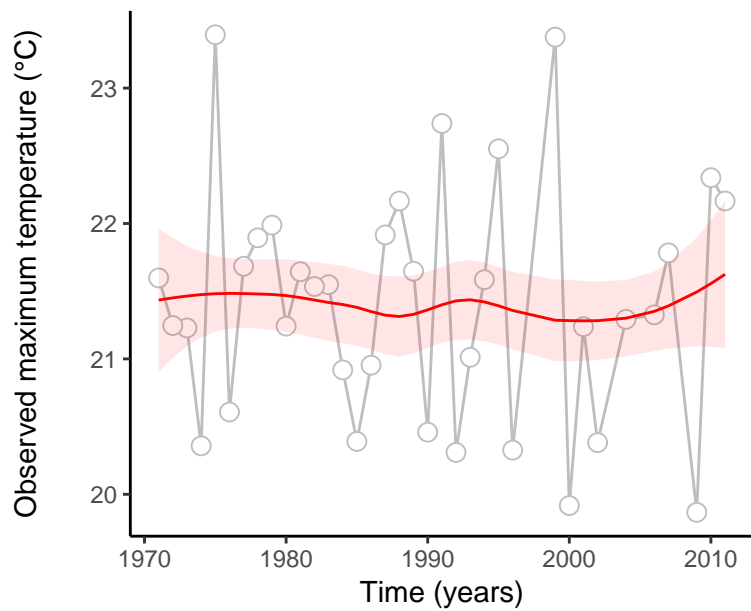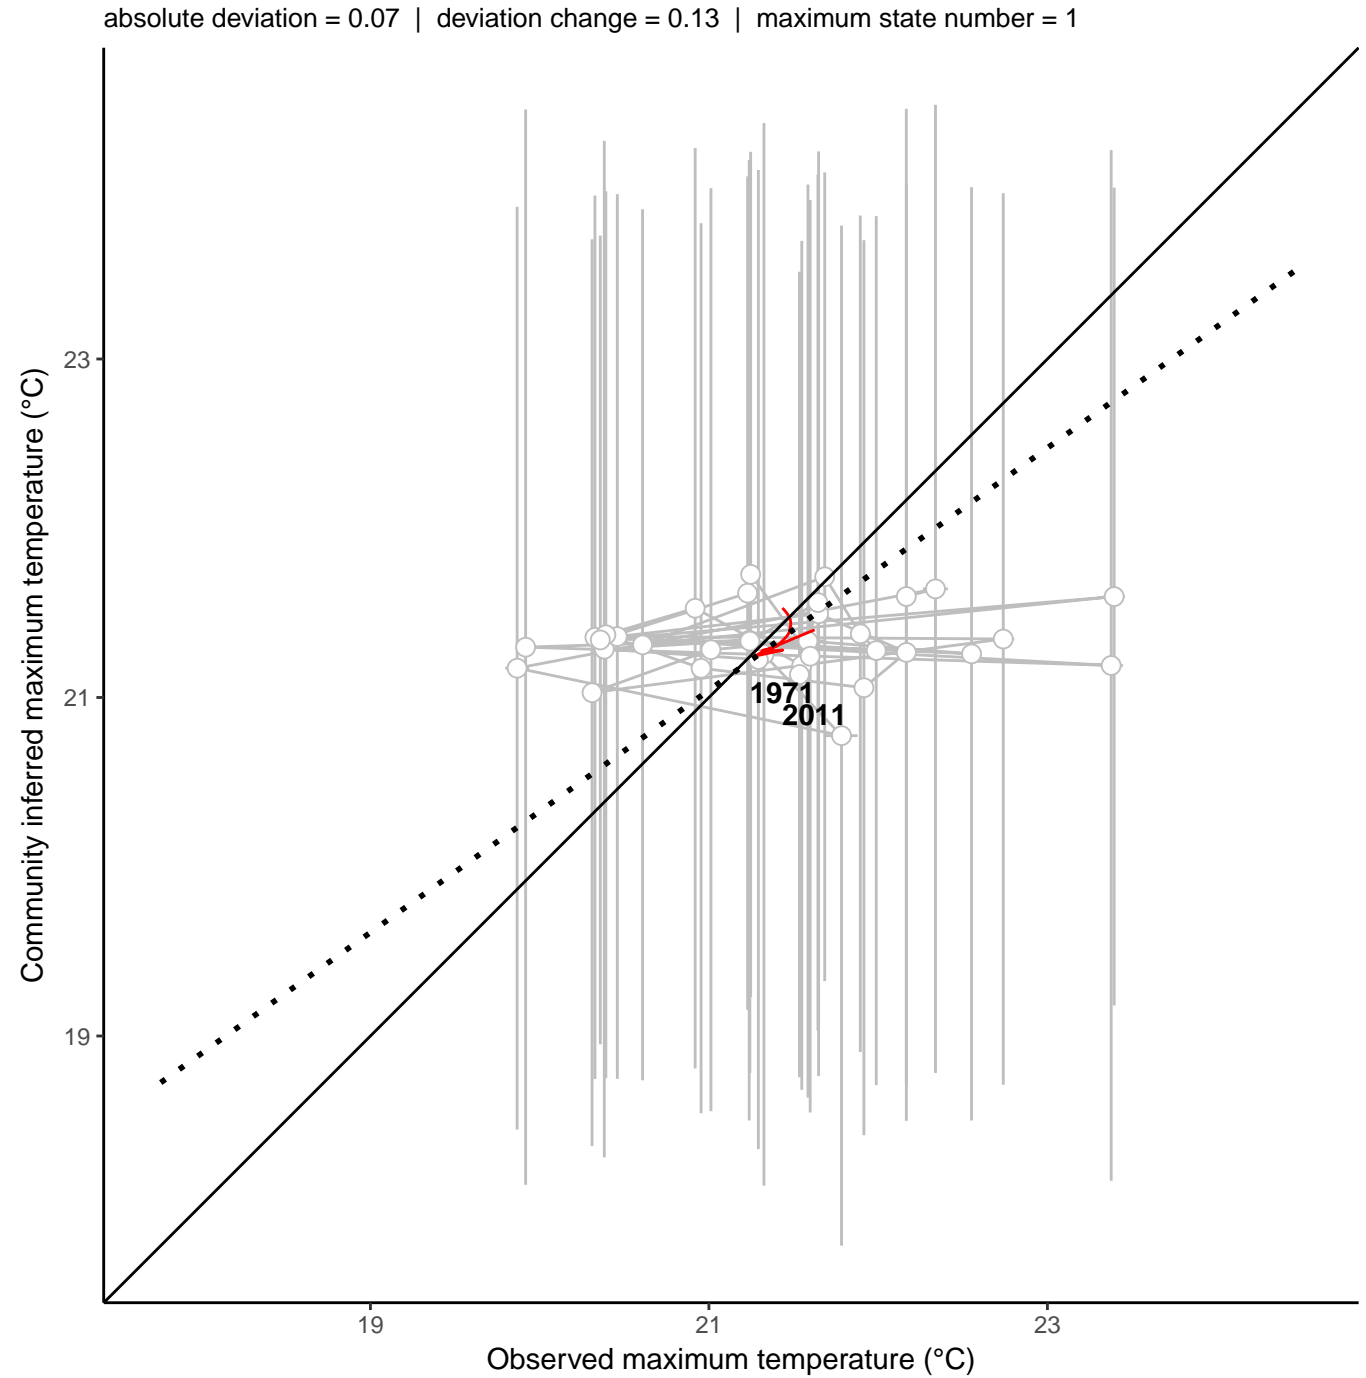



site : 840\_83\_50

absolute deviation = 4.75 | deviation change = 1.2 | maximum state number = 1

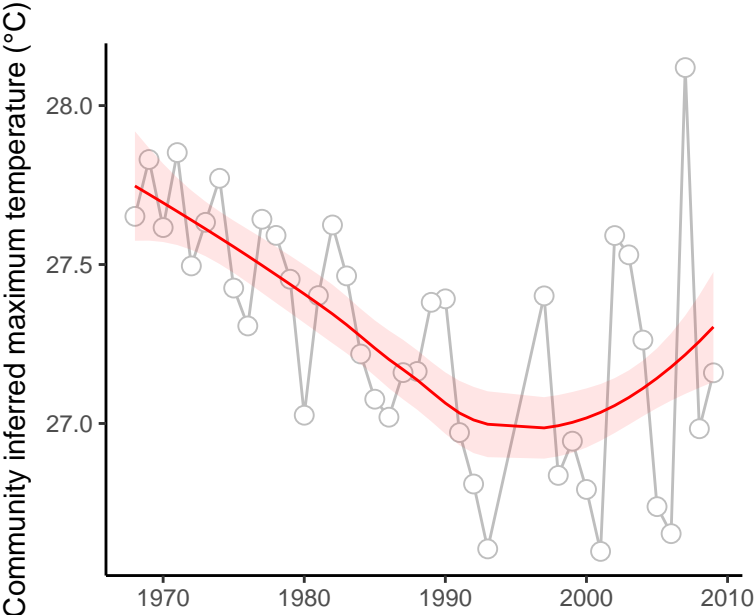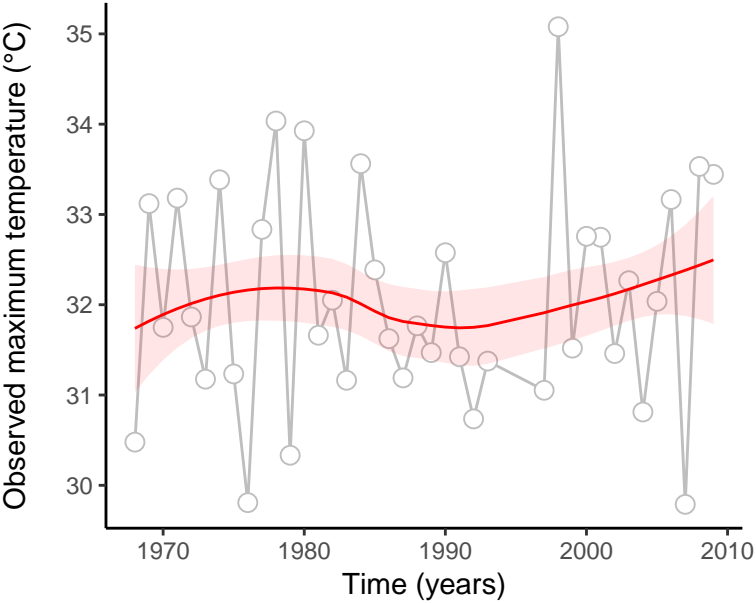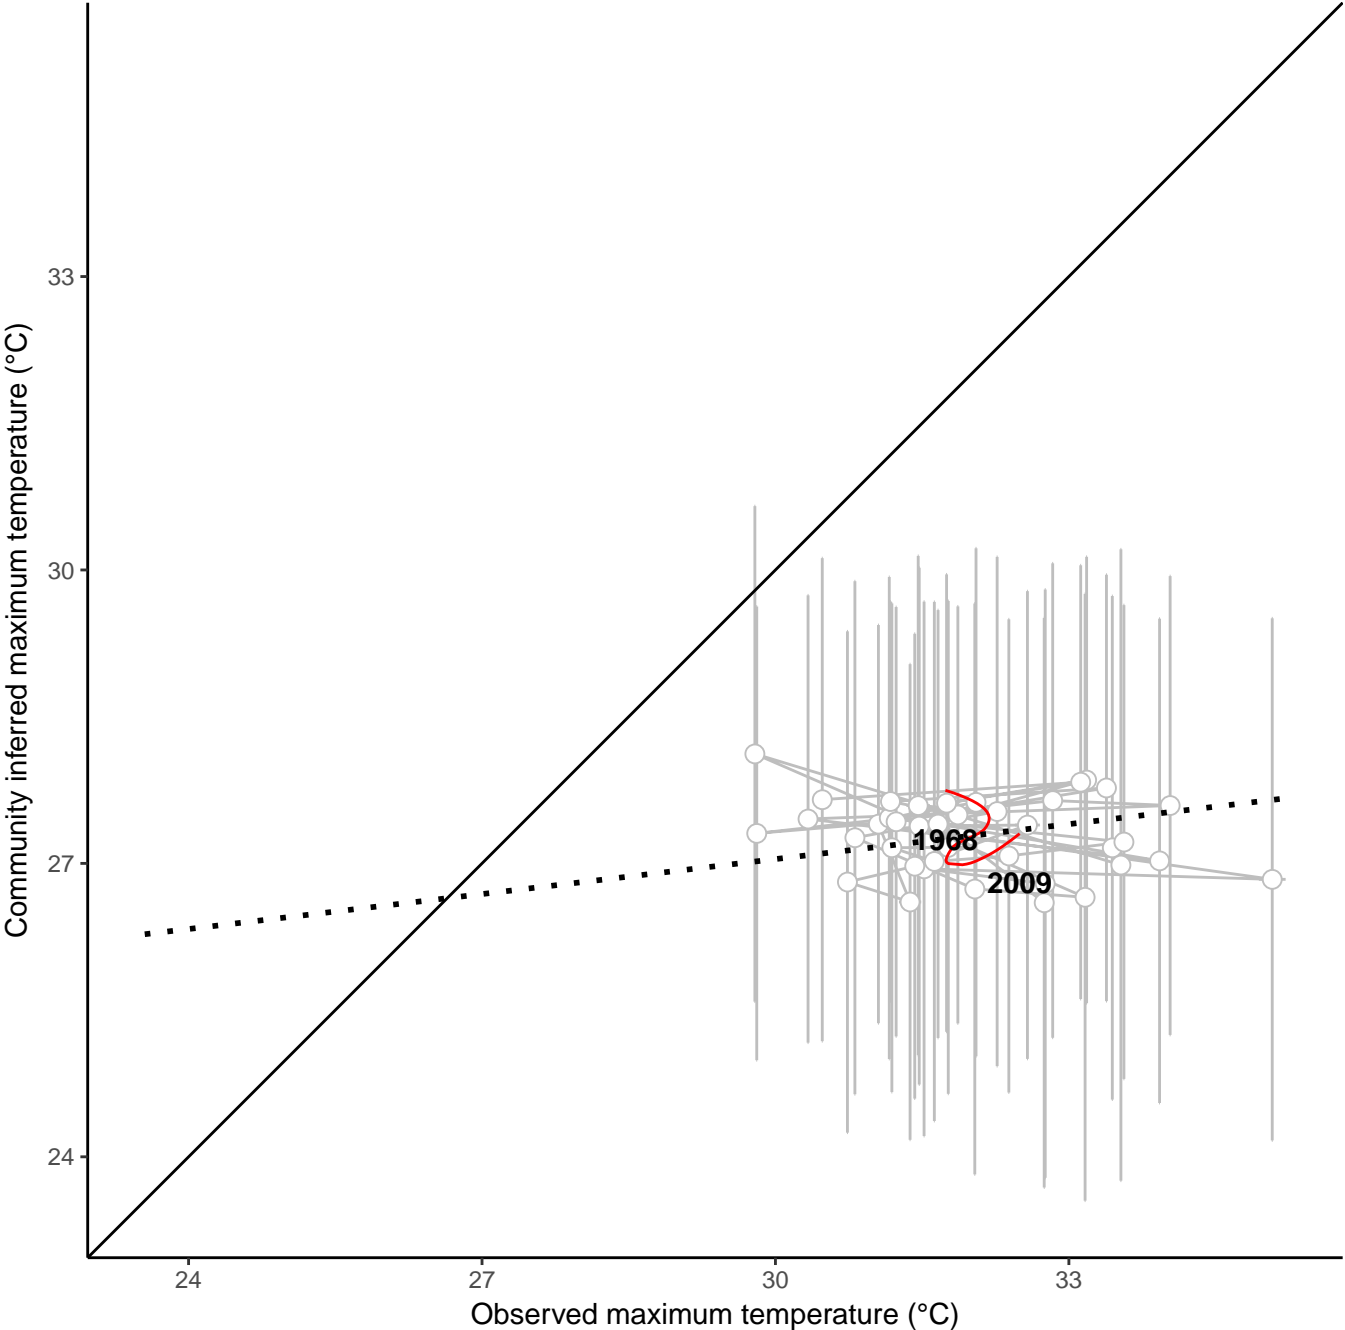

site : 840\_83\_78

absolute deviation = 6.29 | deviation change = 0.83 | maximum state number = 1

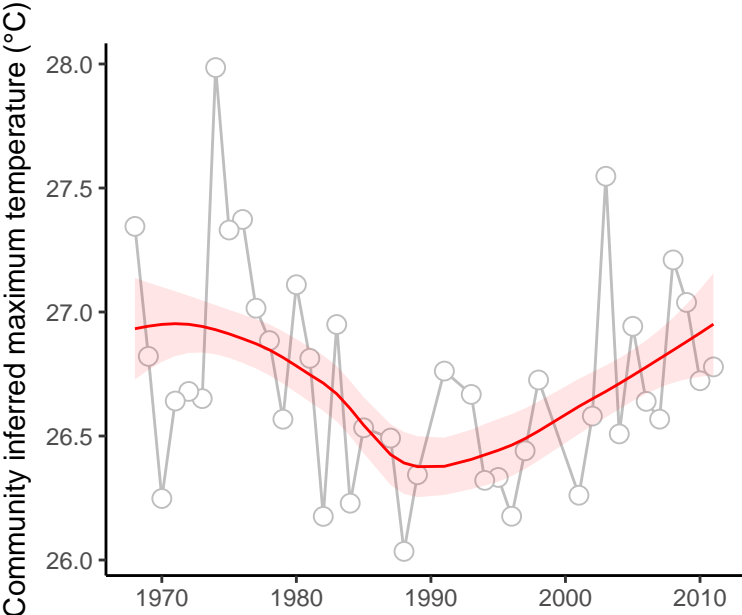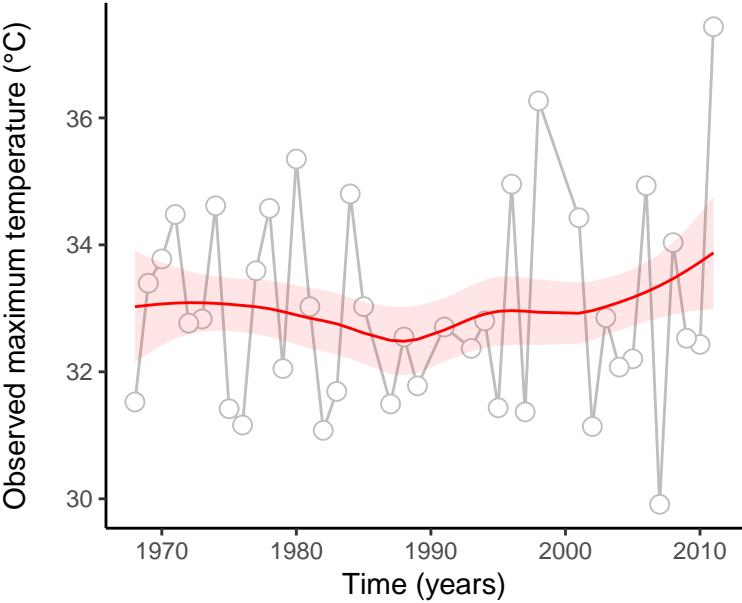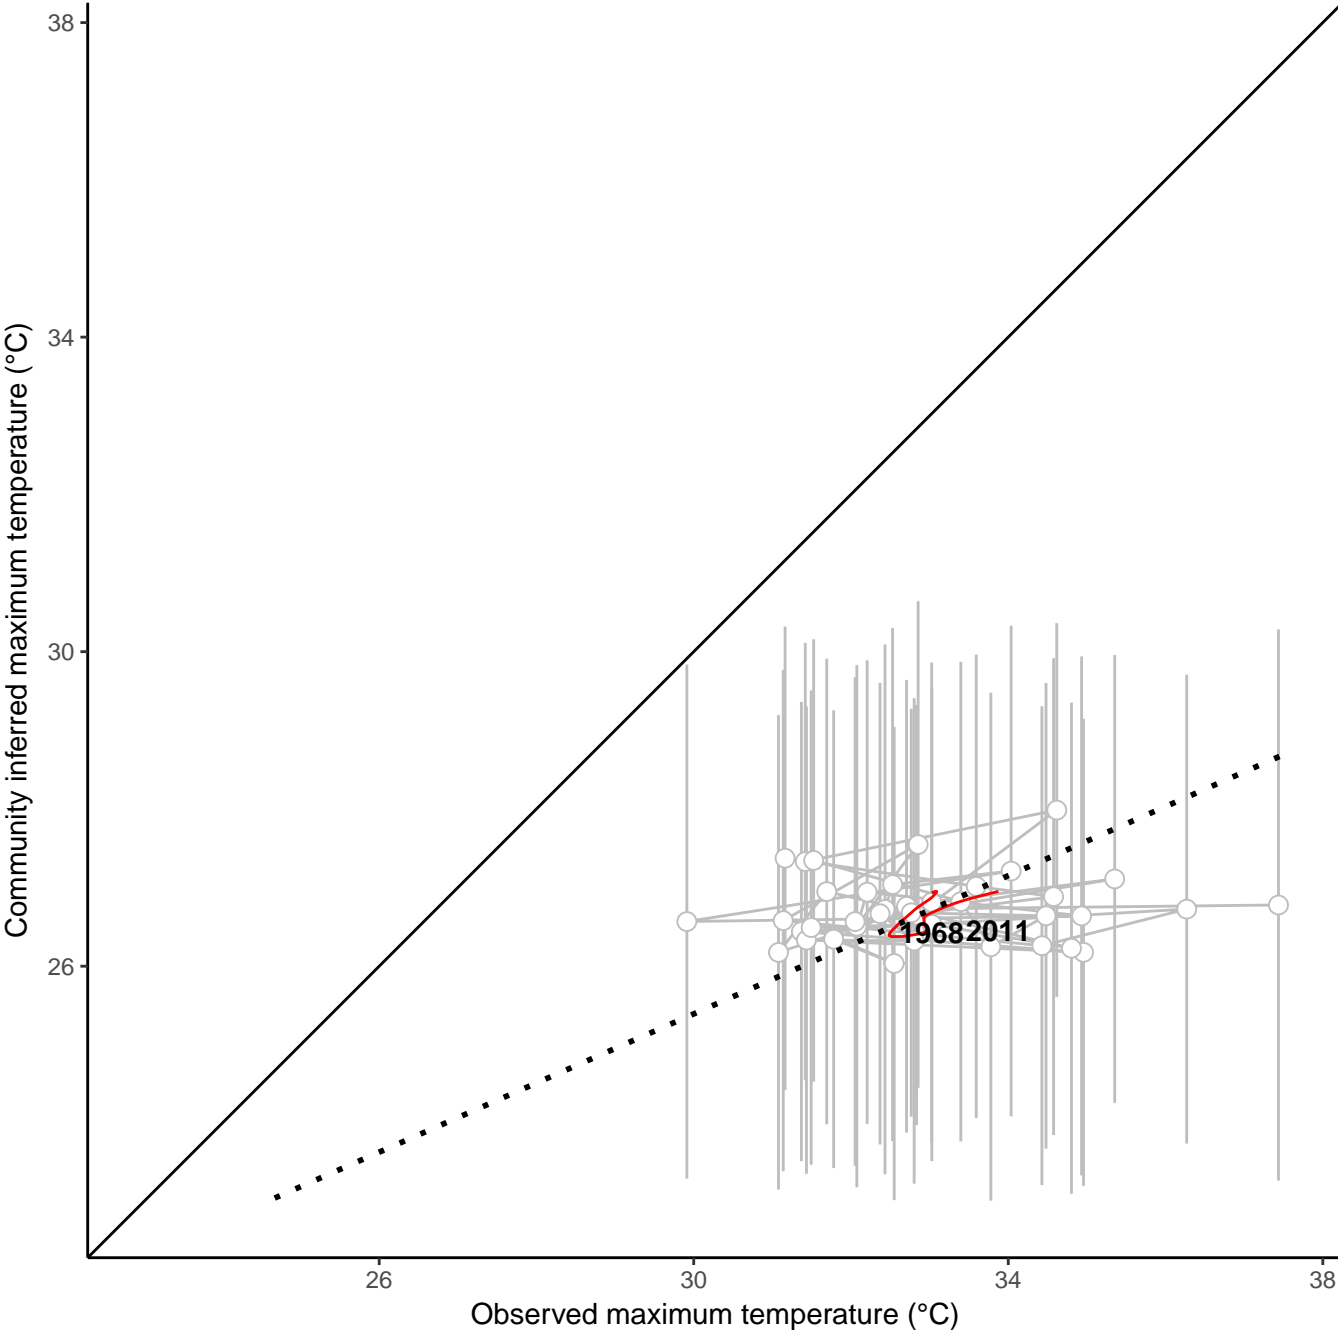

site : 840\_88\_8

absolute deviation = 1.91 | deviation change = 0.83 | maximum state number = 1

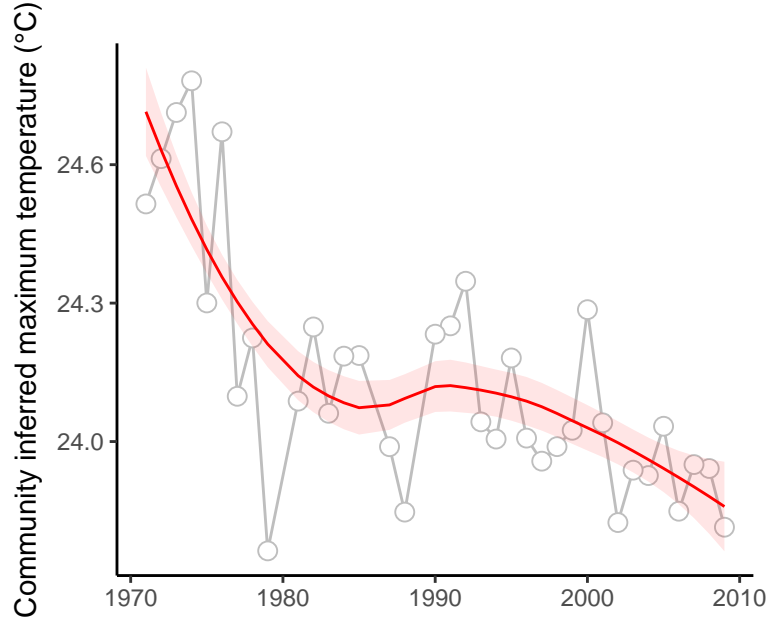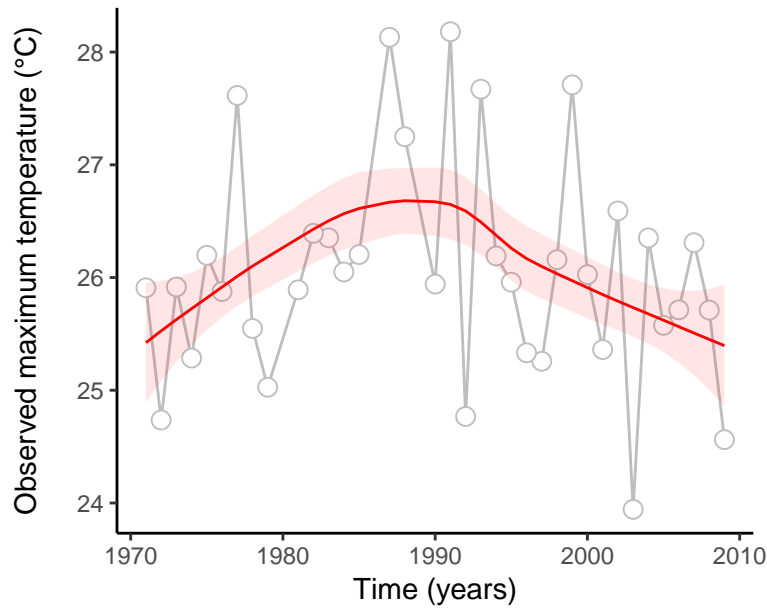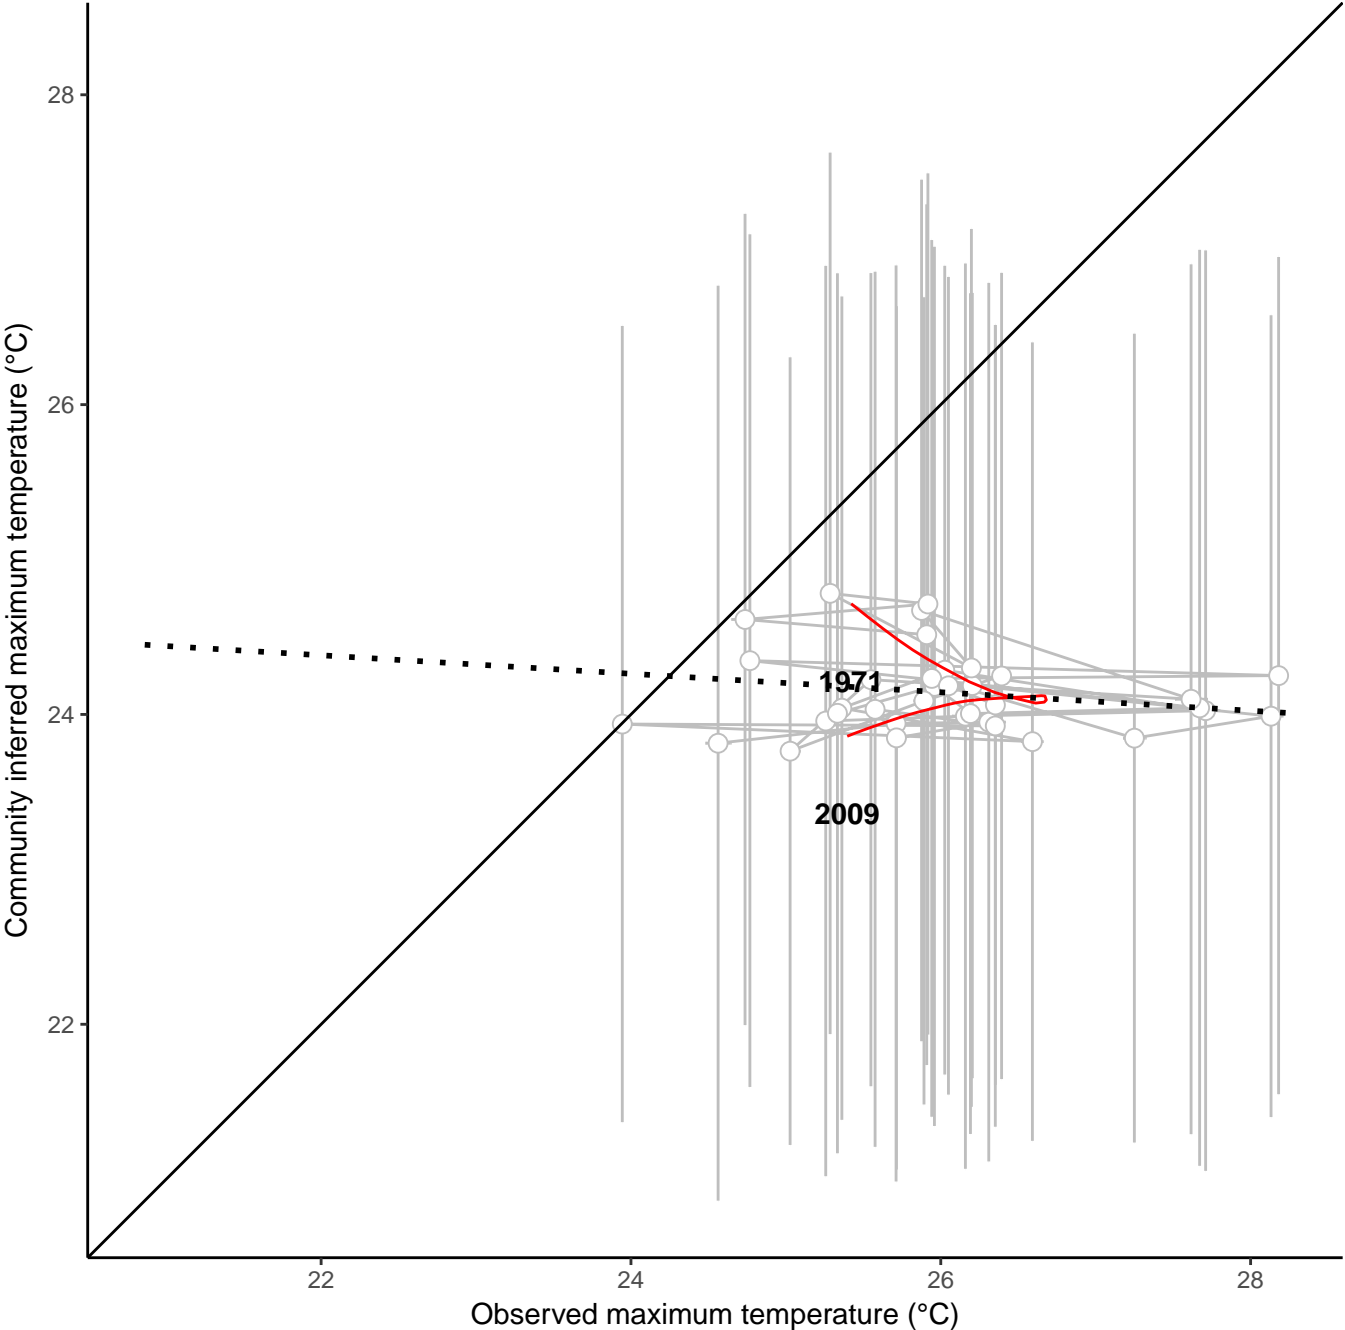

site : 840\_89\_3

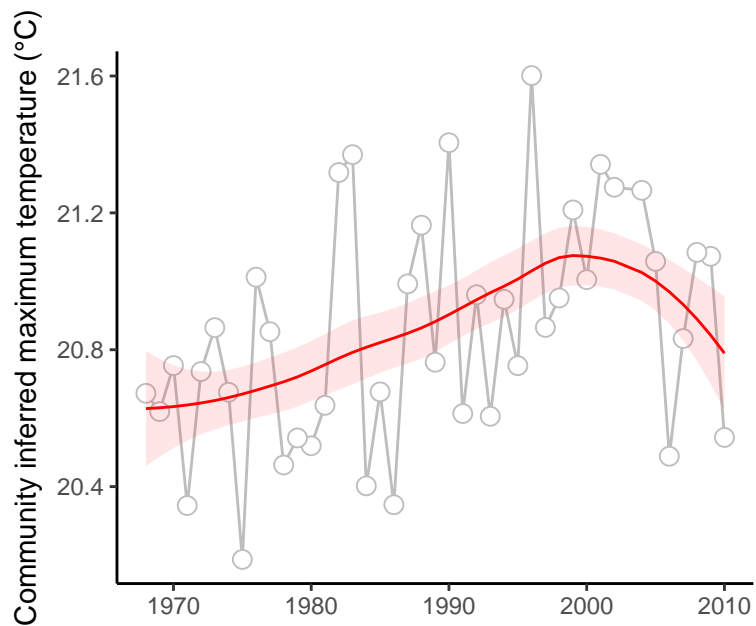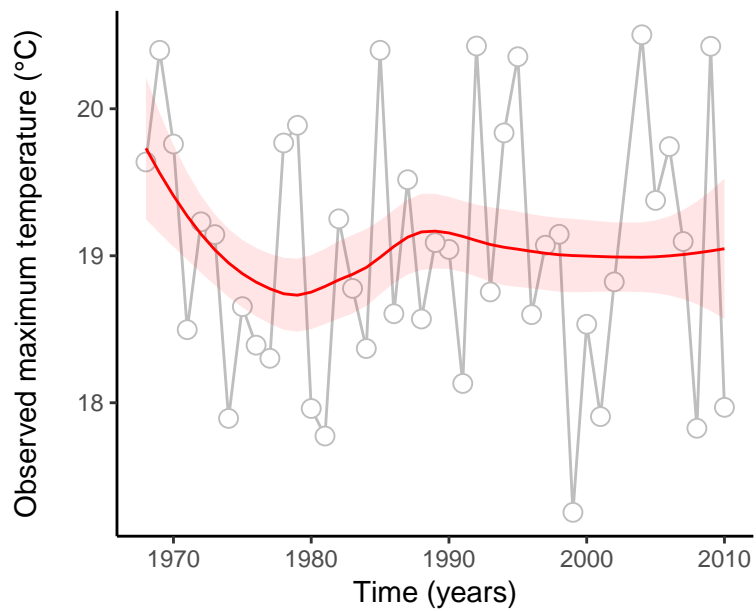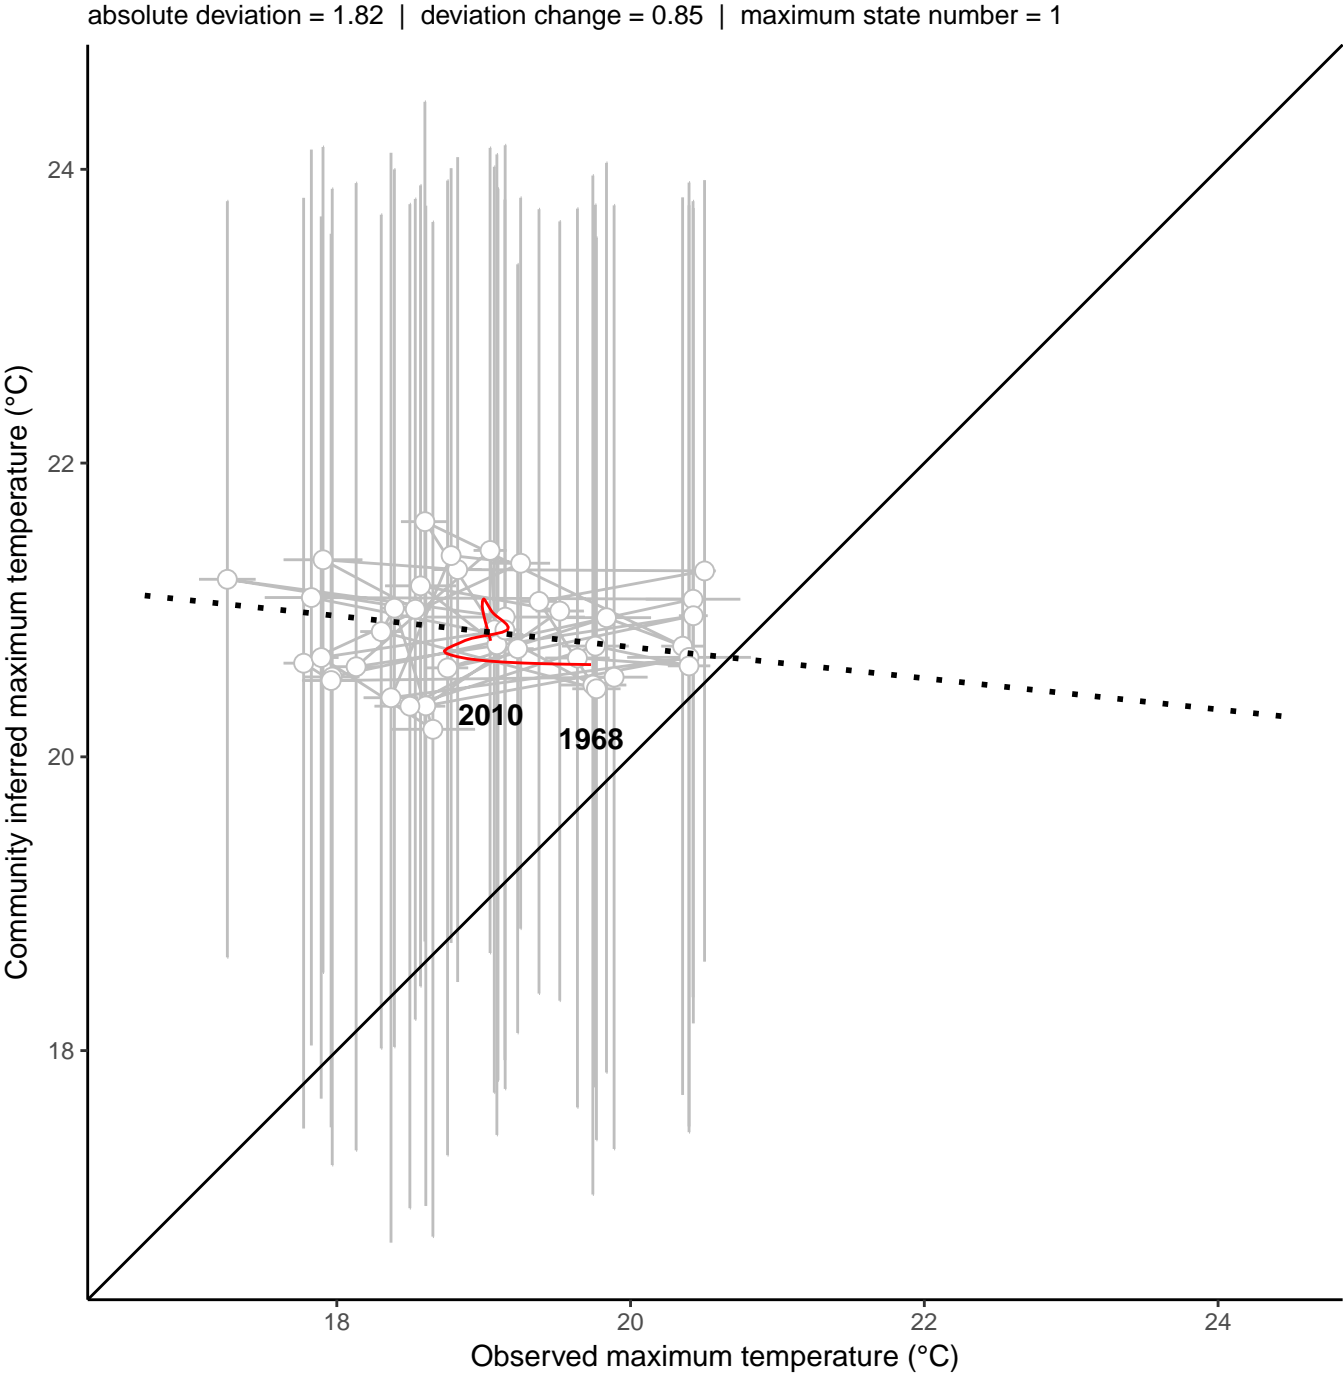

site : 840\_18\_15

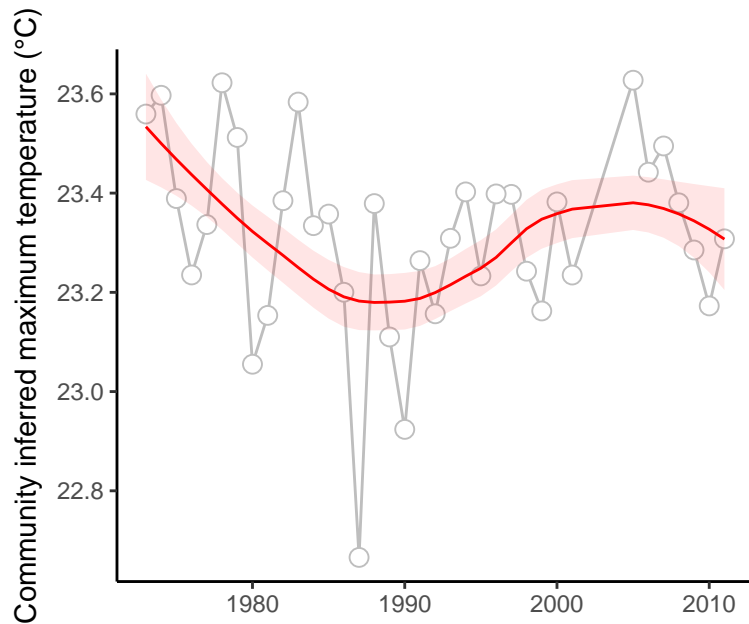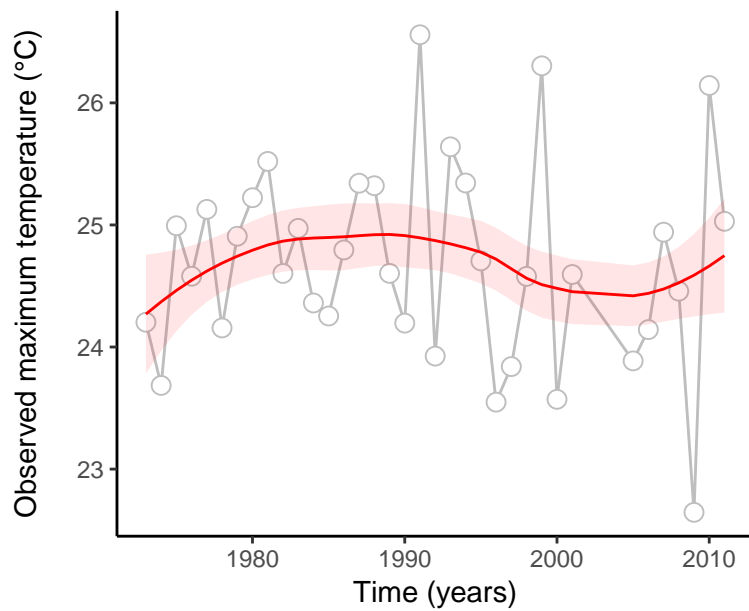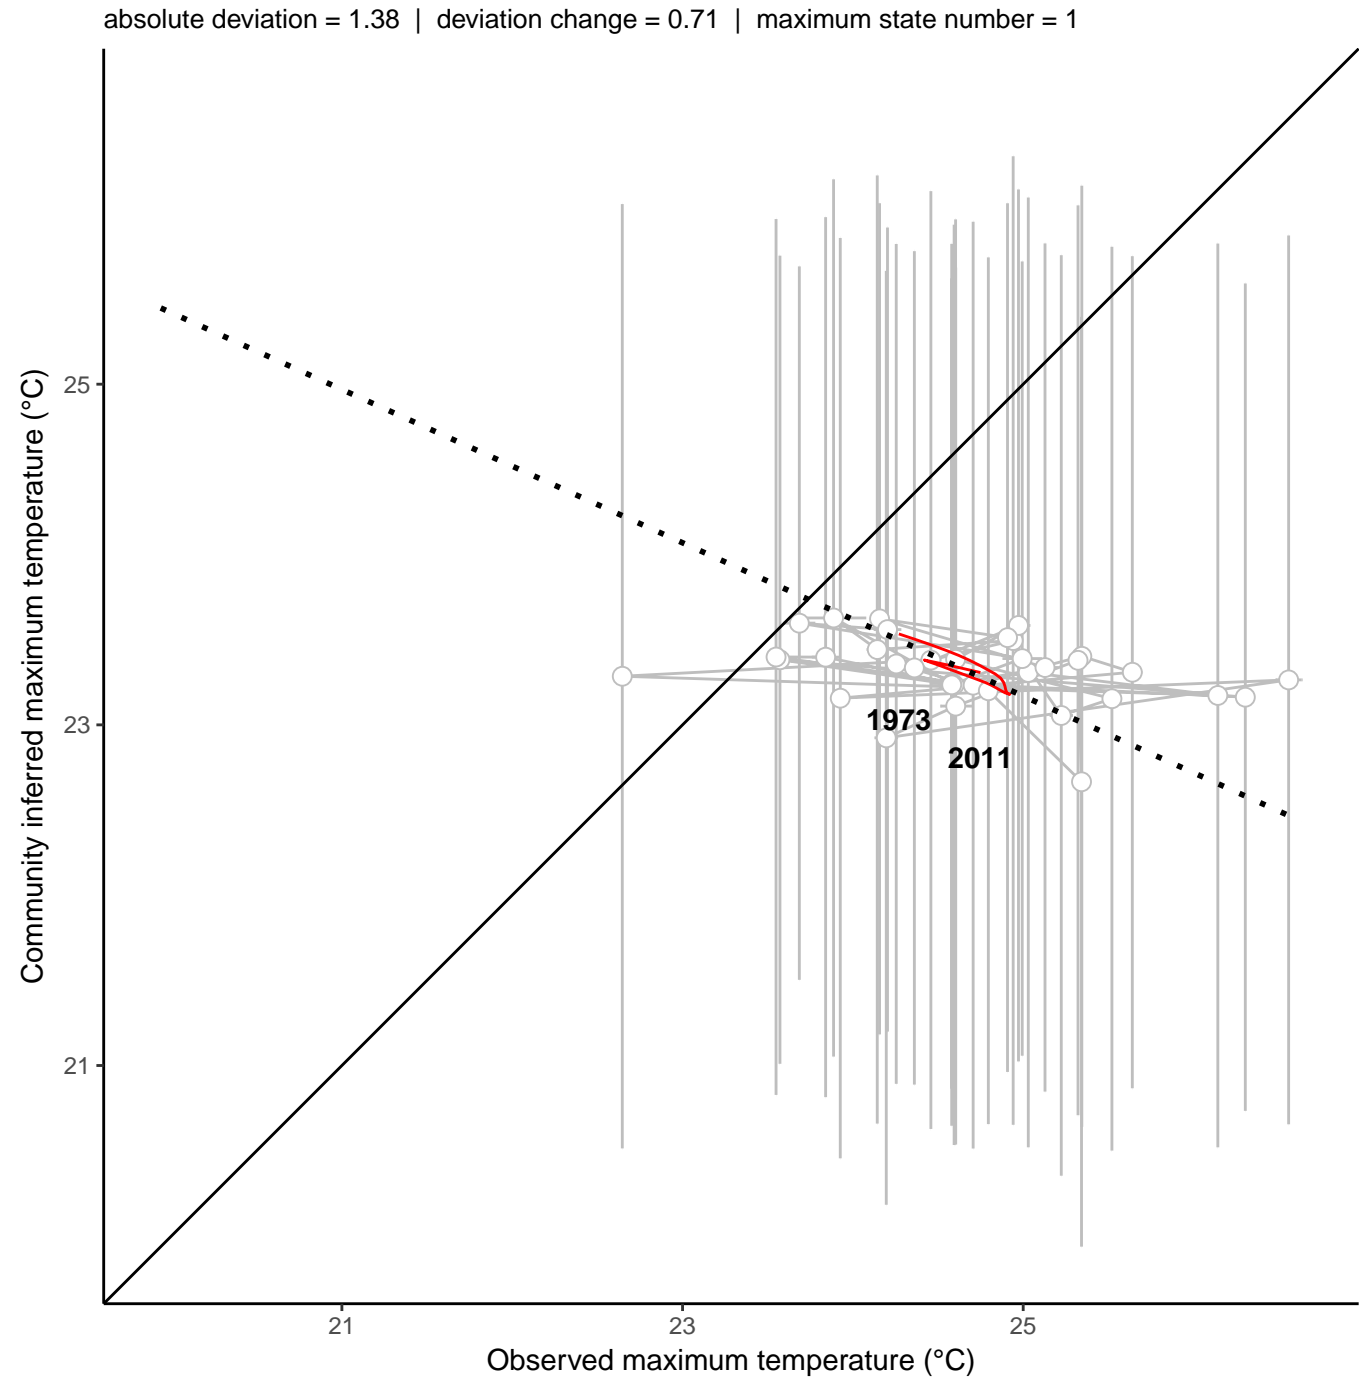

site : 840\_18\_7

absolute deviation = 0.66 | deviation change = 0.05 | maximum state number = 1

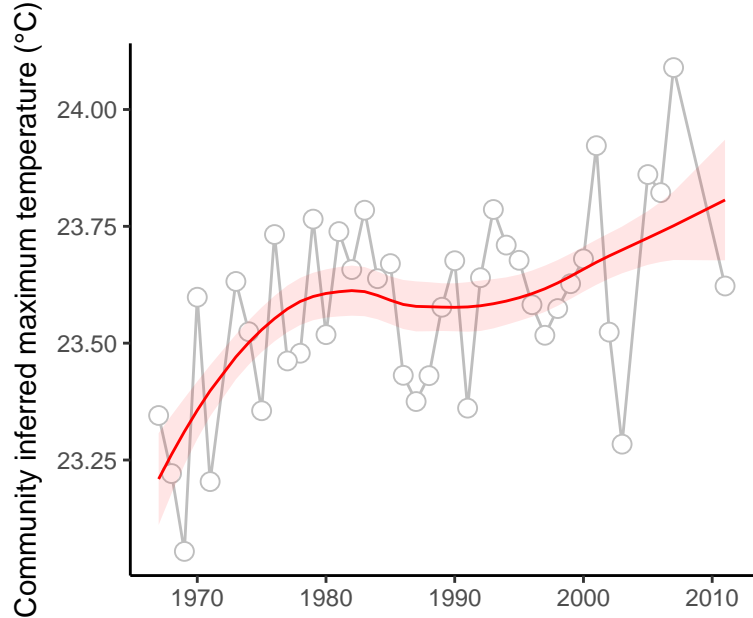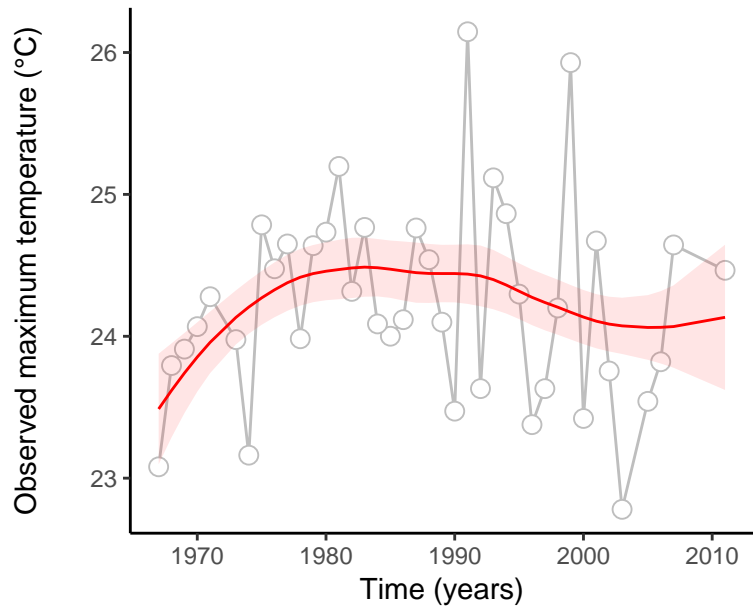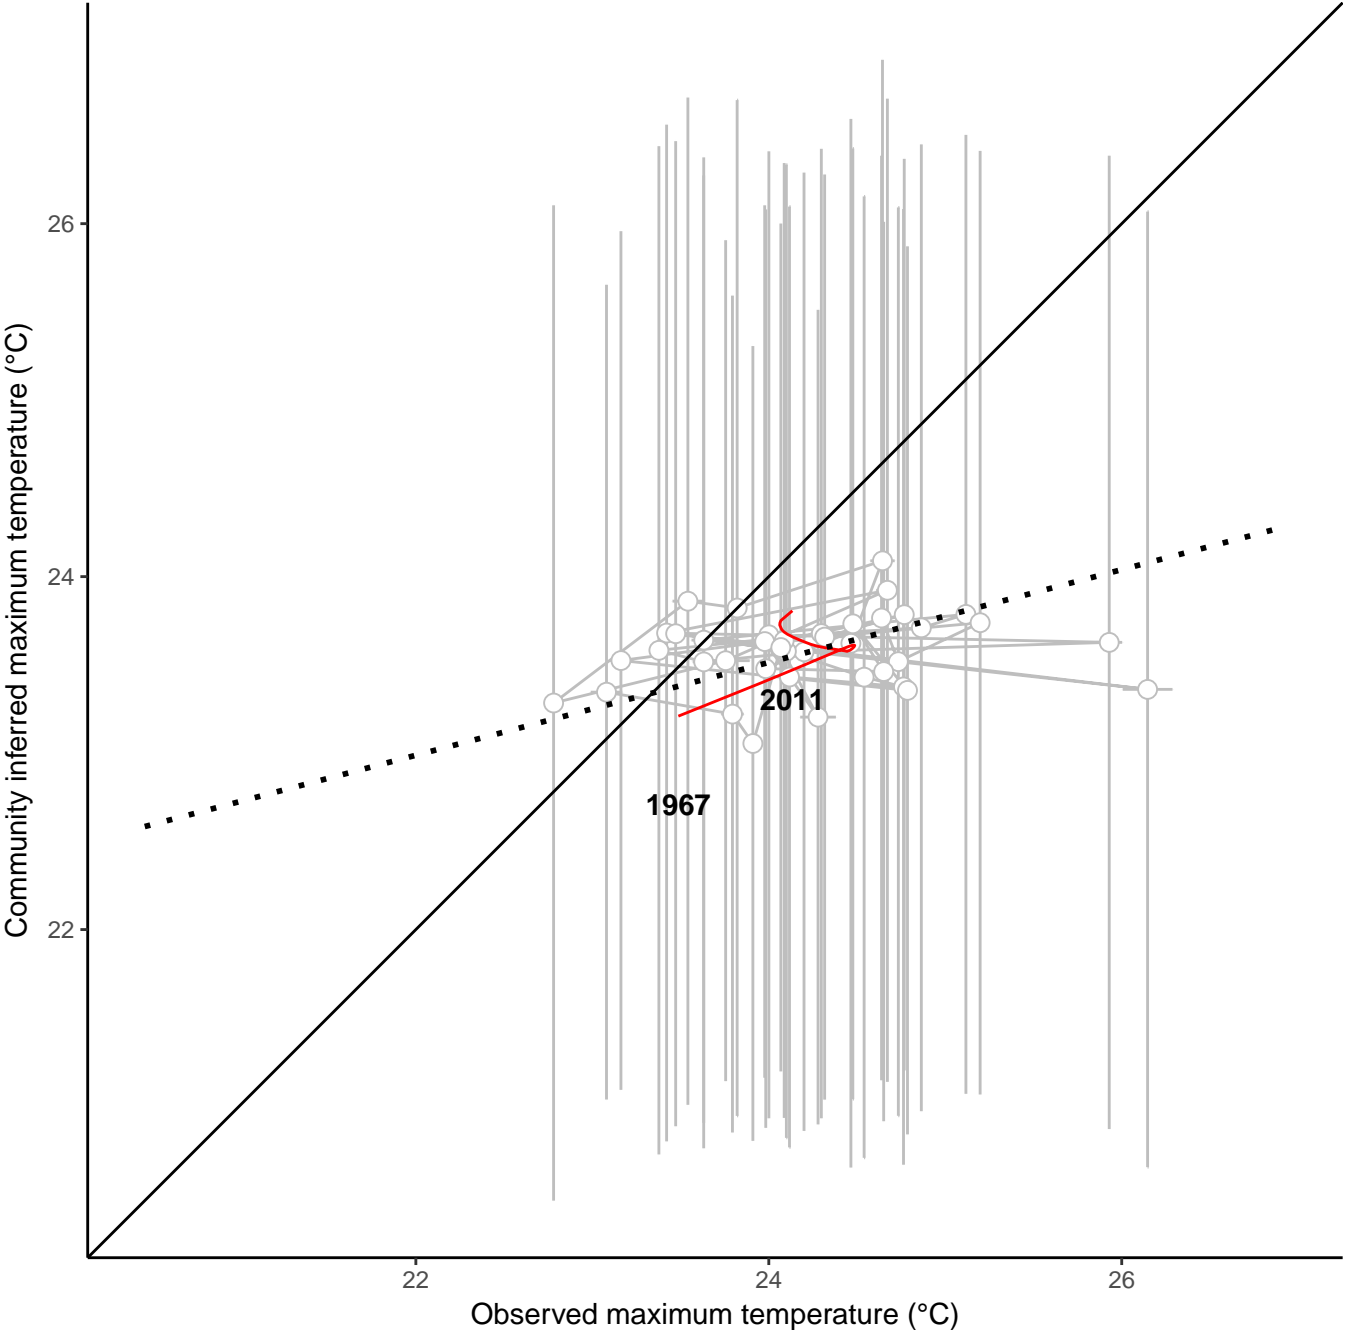

site : 840\_2\_38

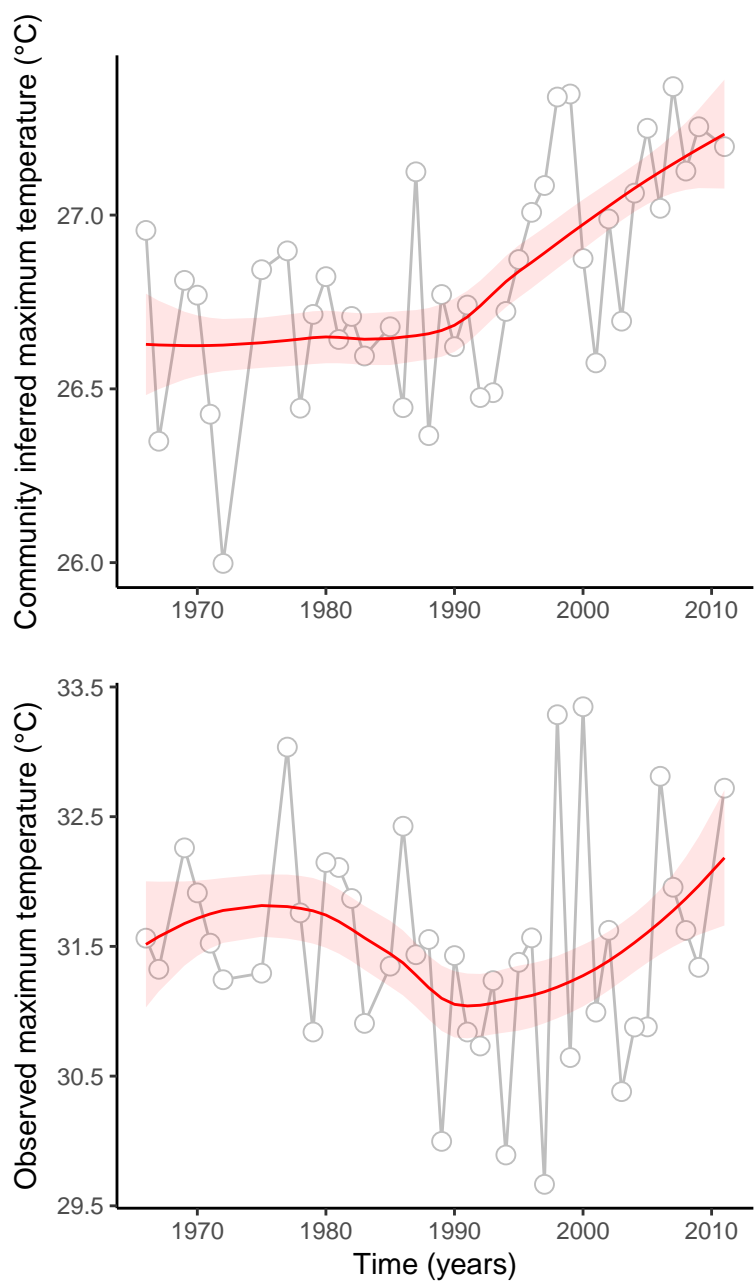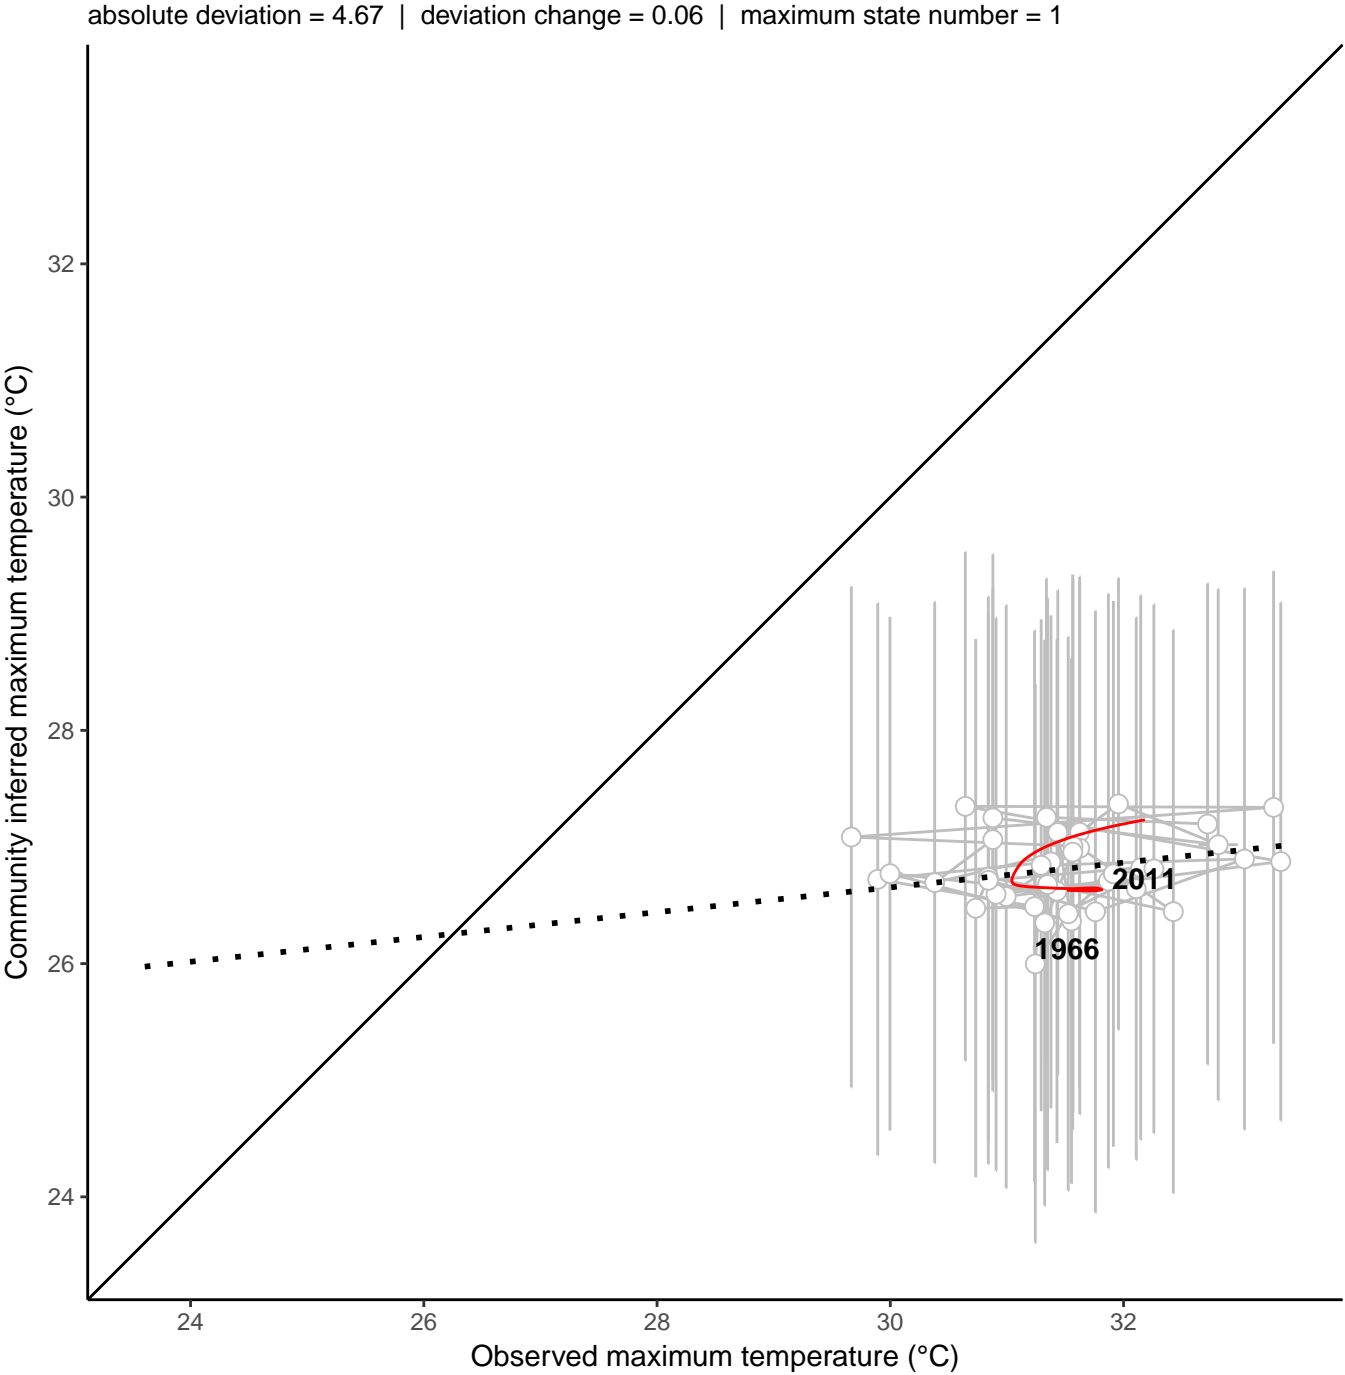

site : 840\_21\_10

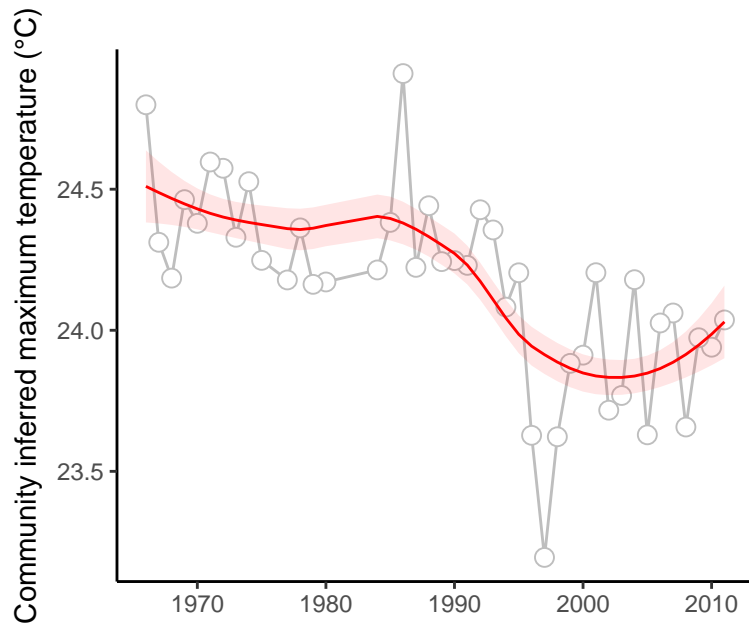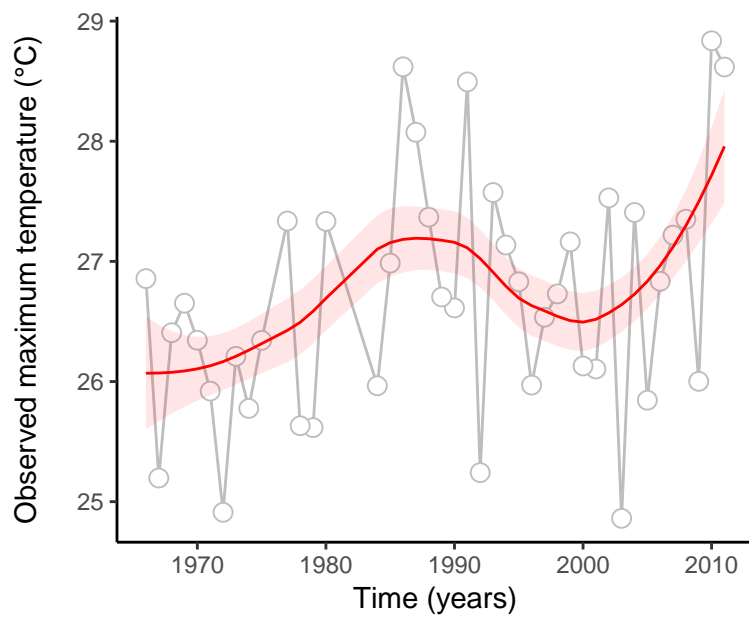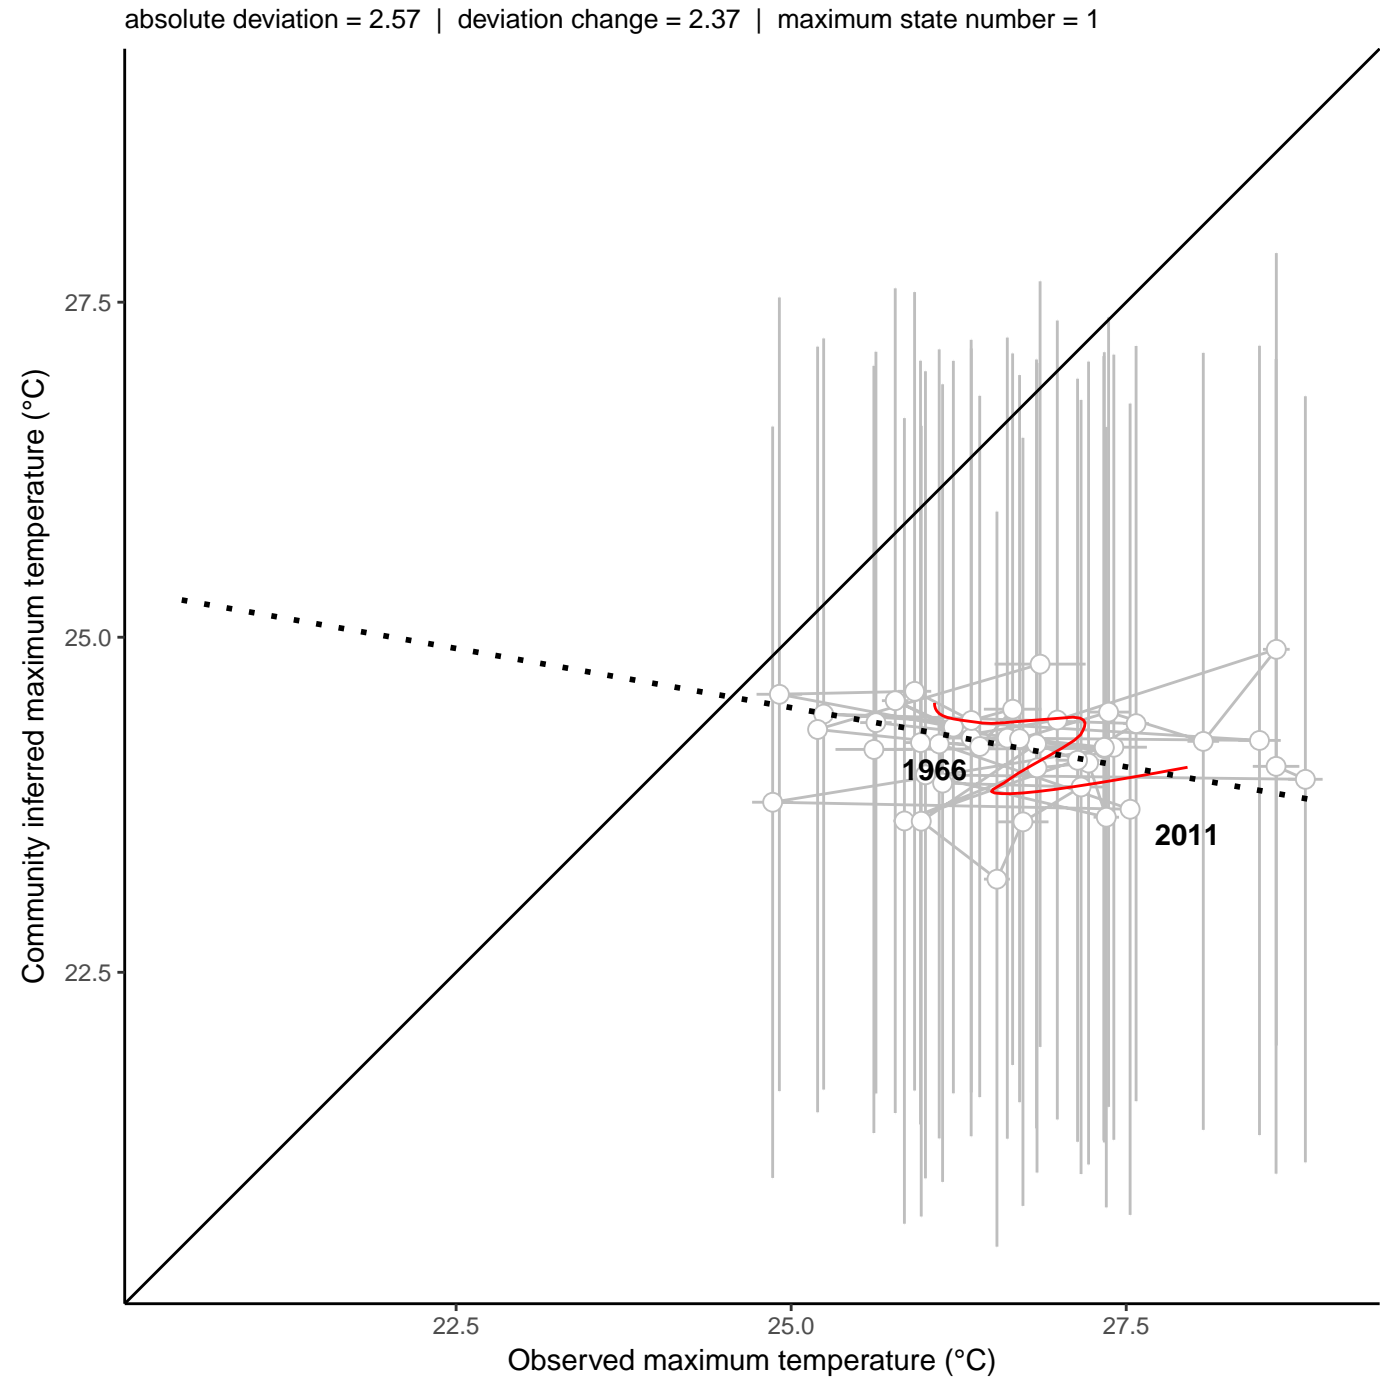



site : 840\_34\_34

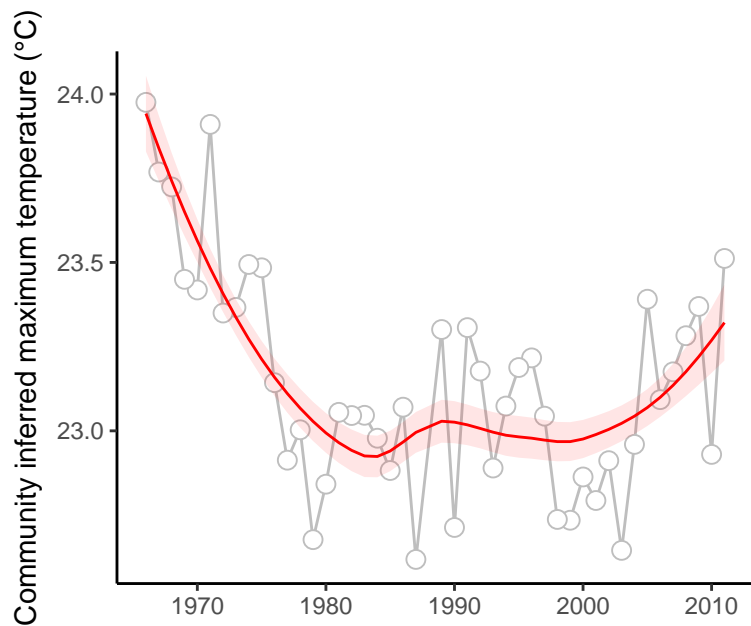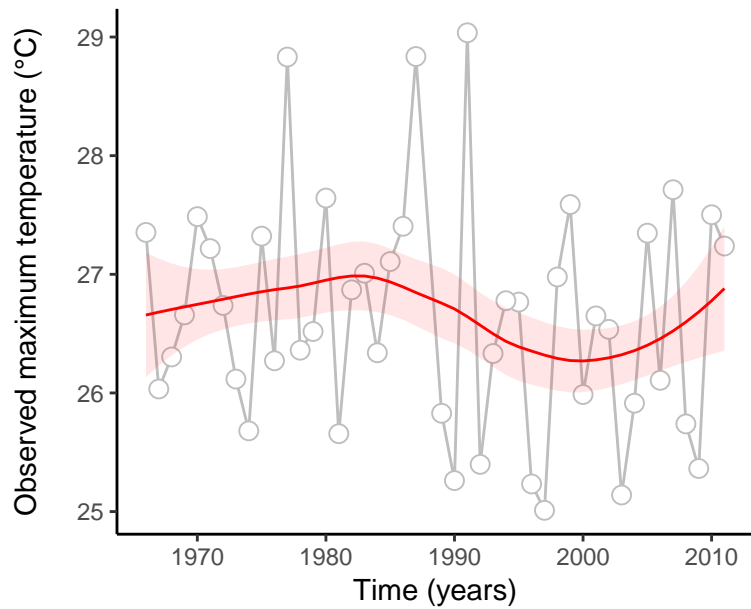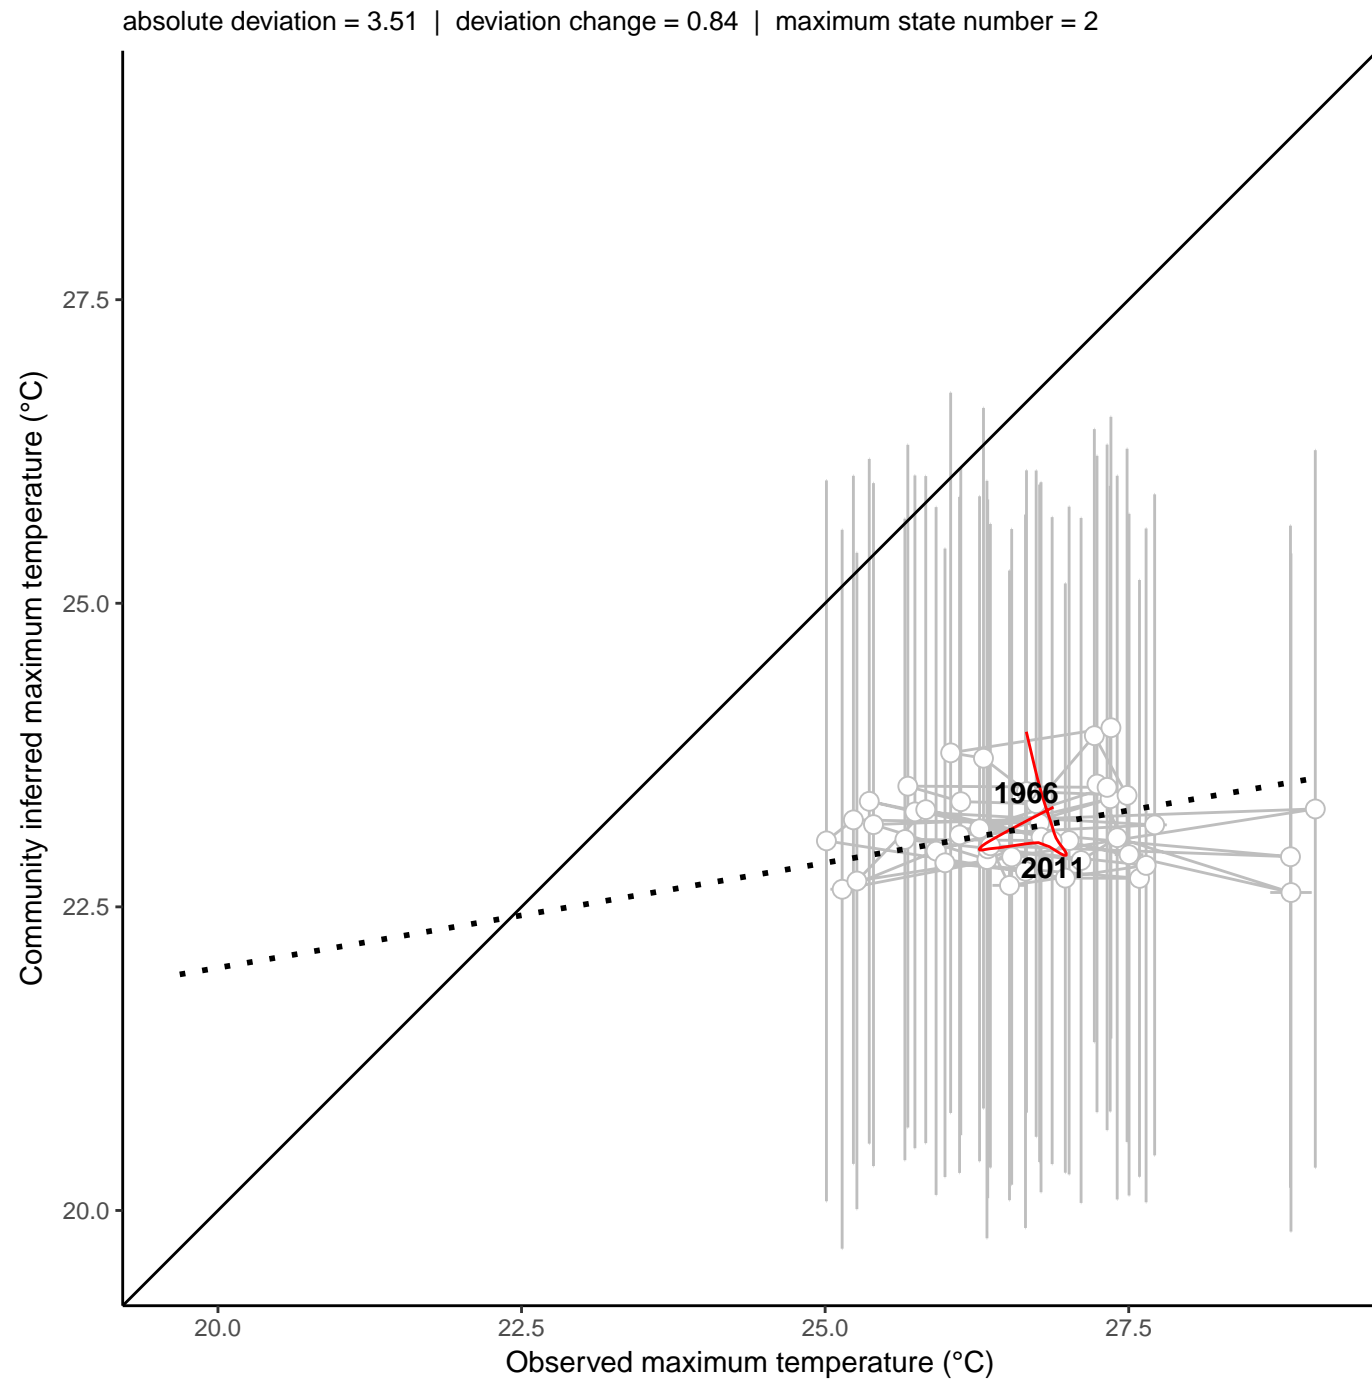

site : 840\_34\_45

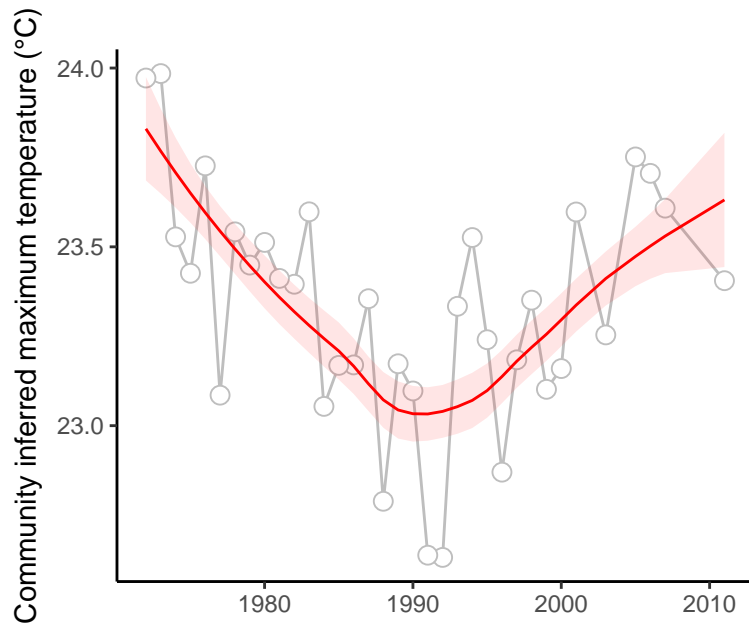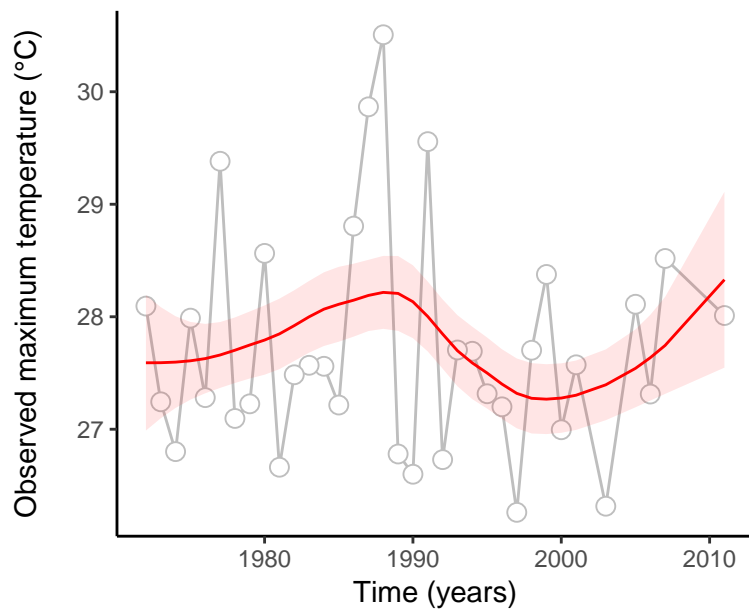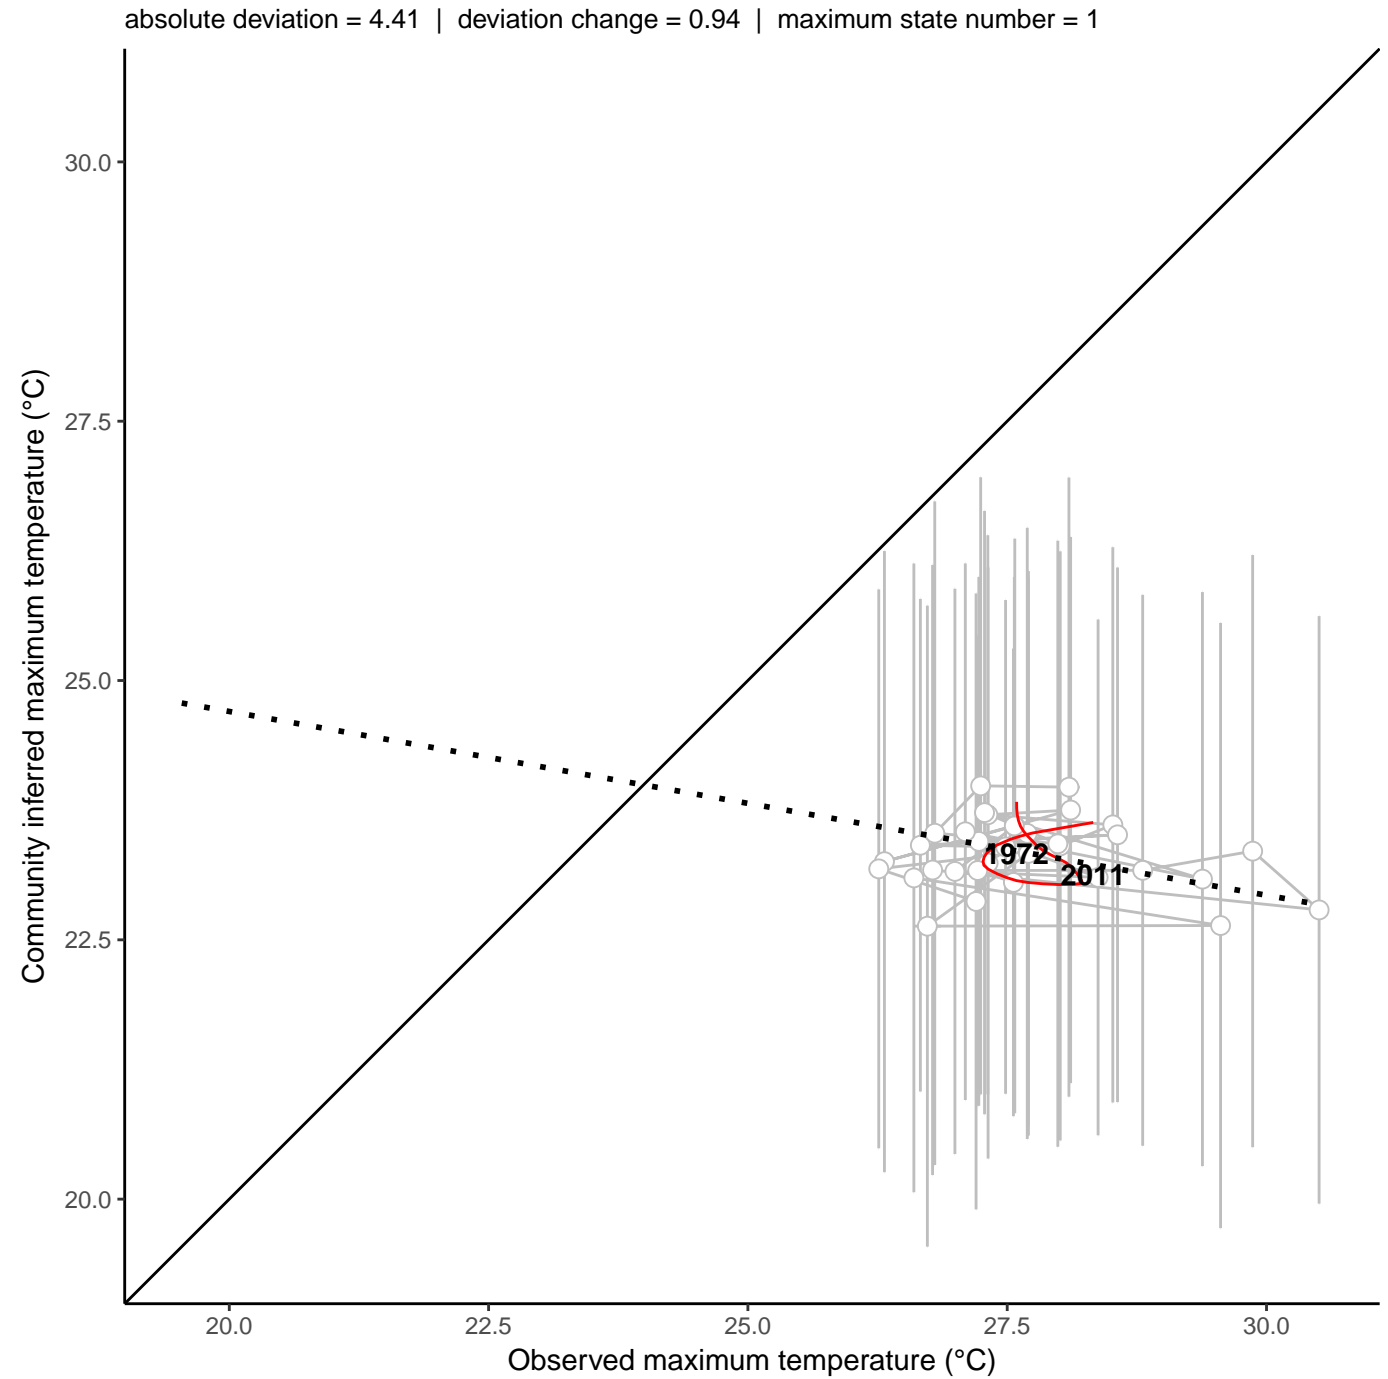

site : 840\_38\_28

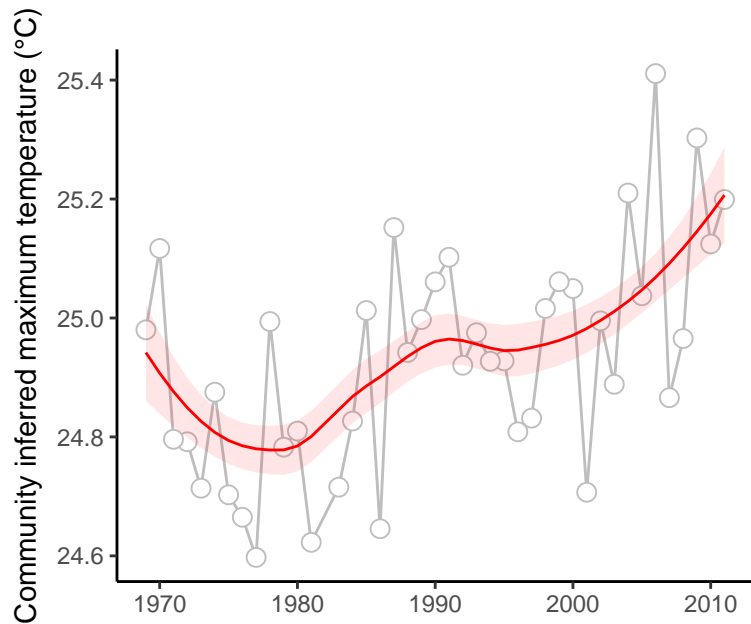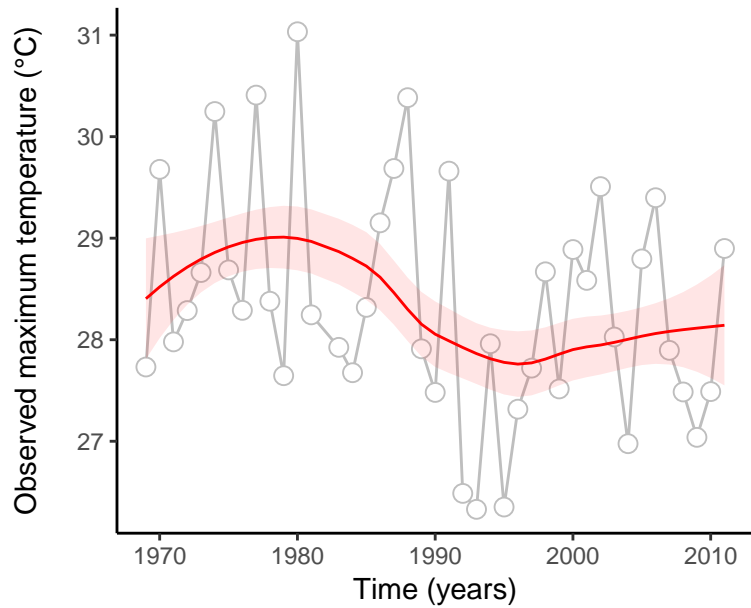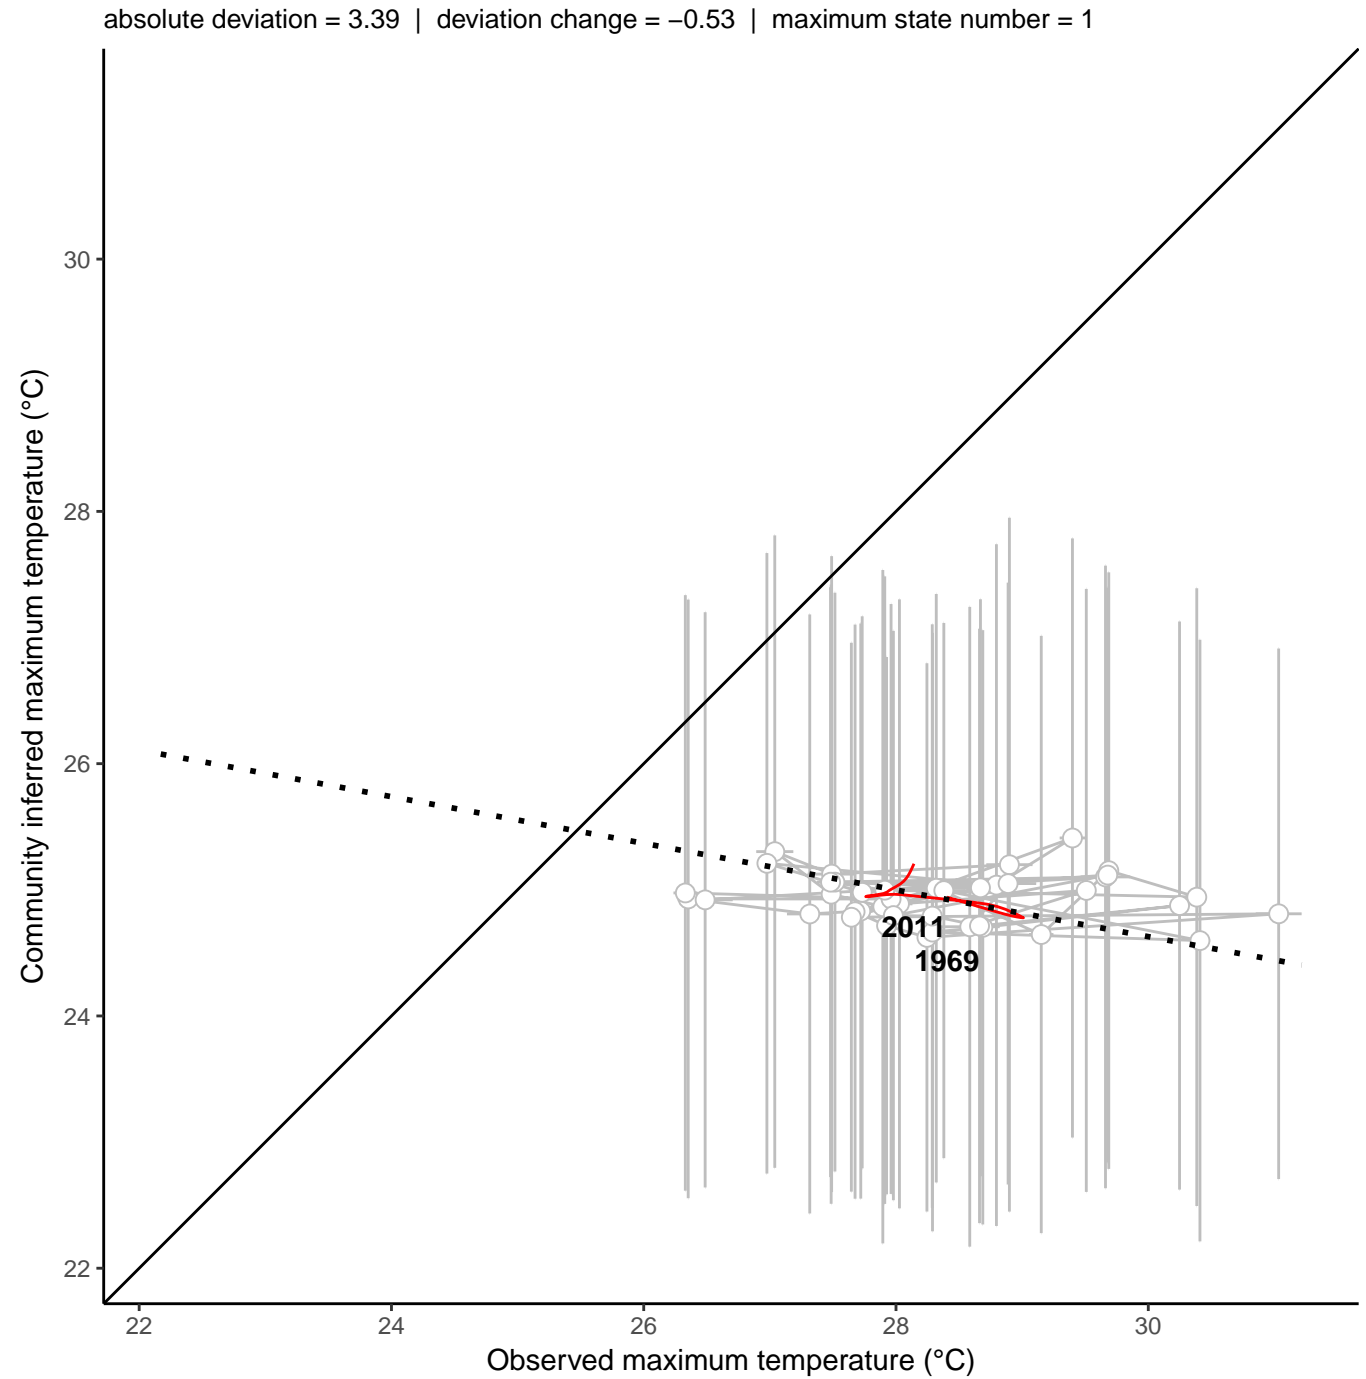

site : 840\_46\_17

absolute deviation = 2.8 | deviation change = 0.81 | maximum state number = 1

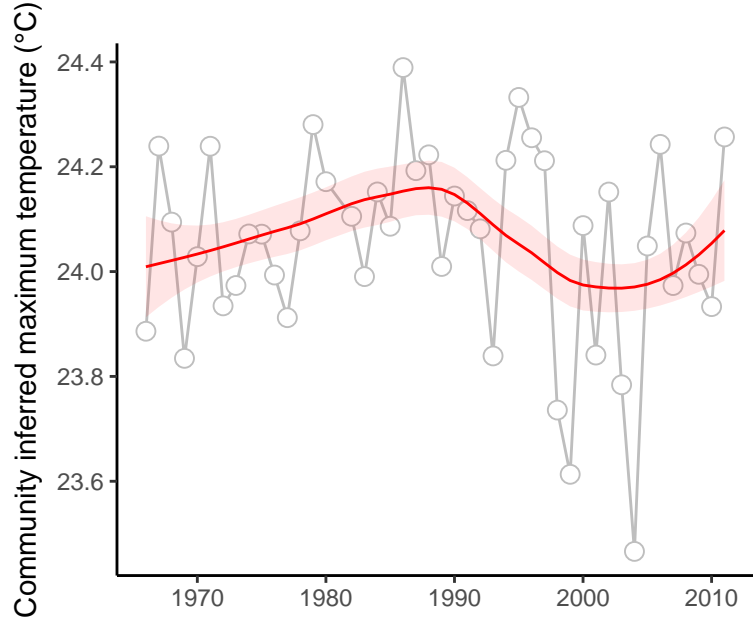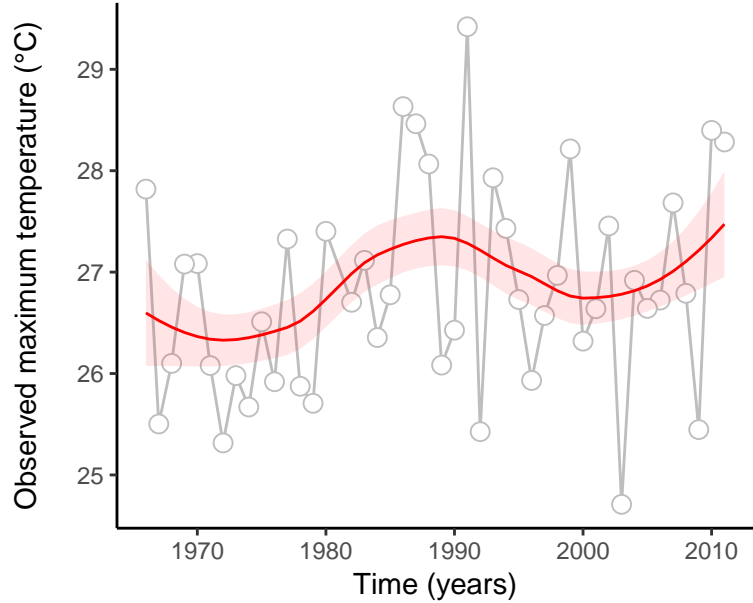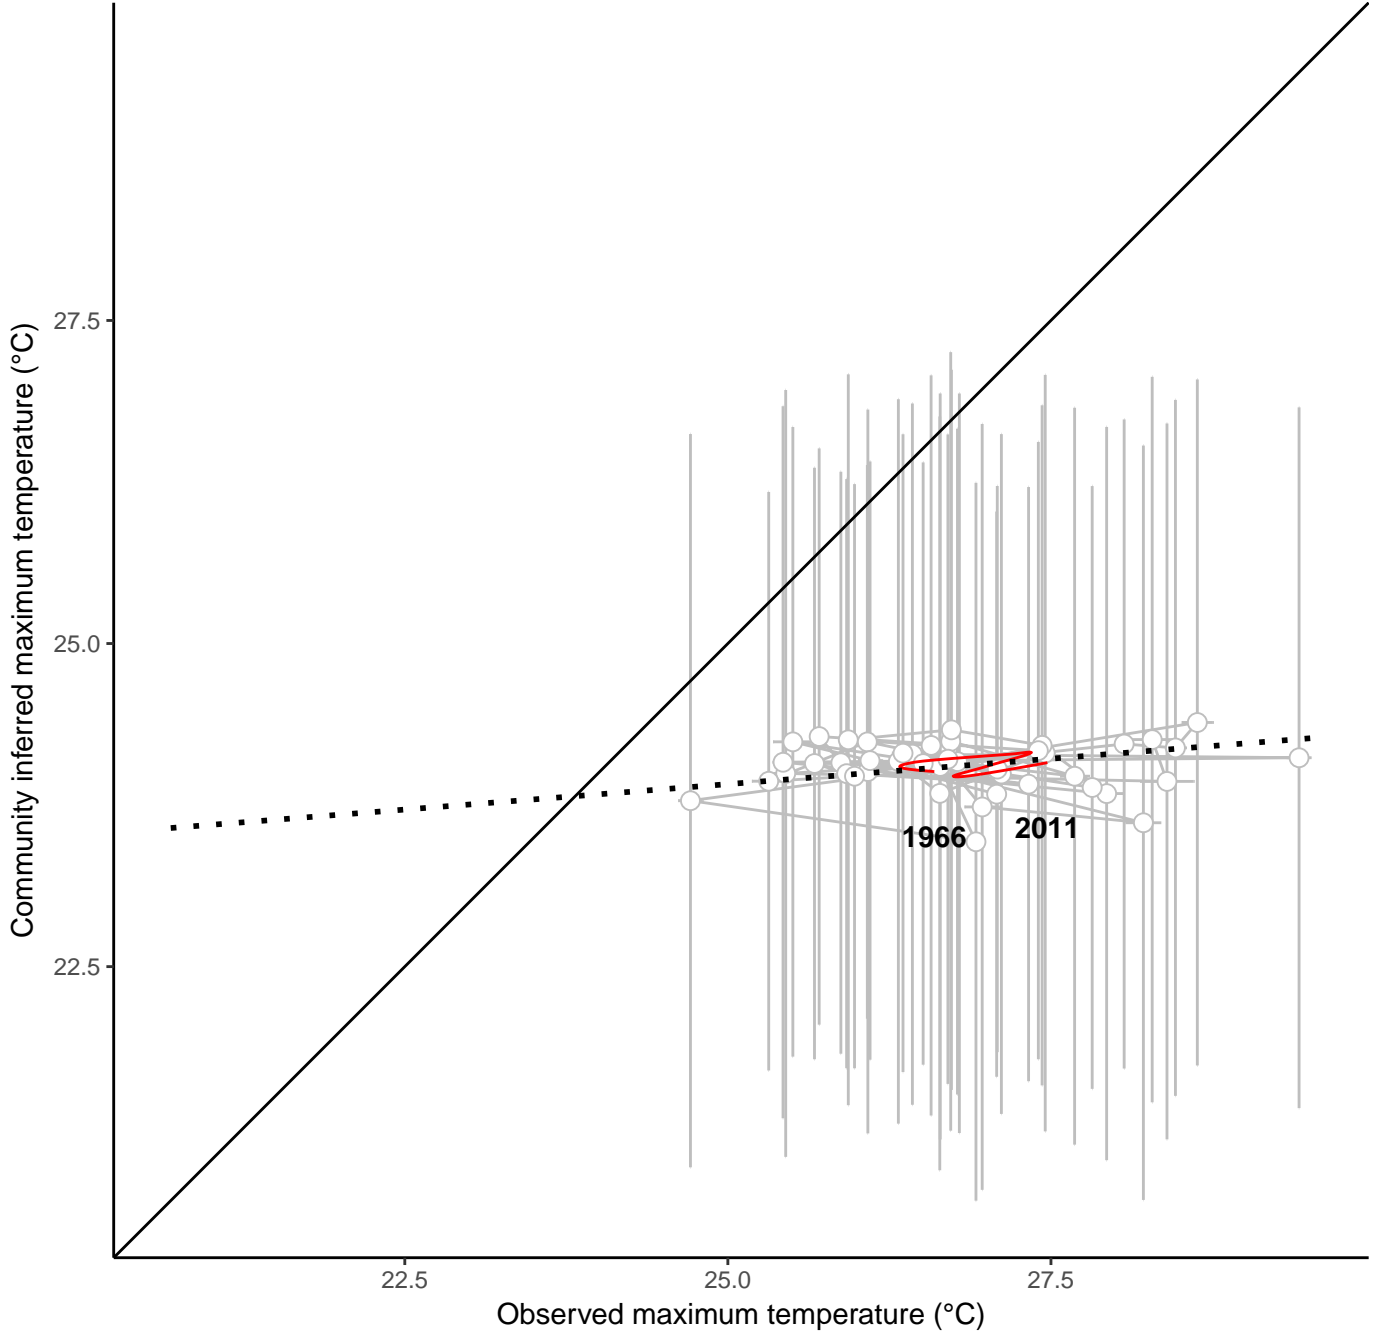

site : 840\_46\_41

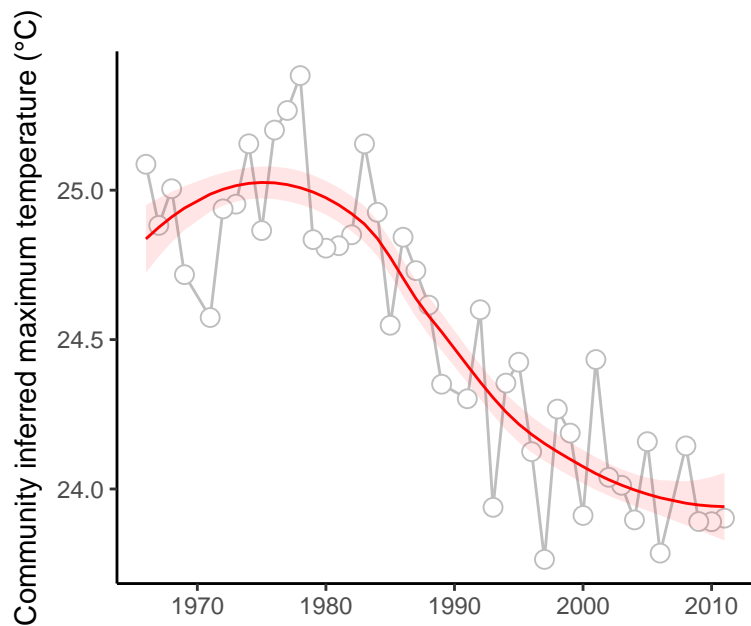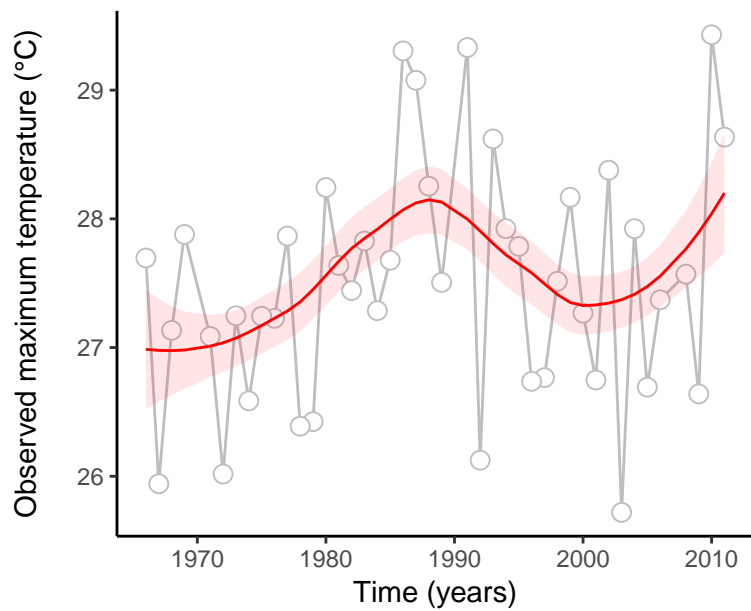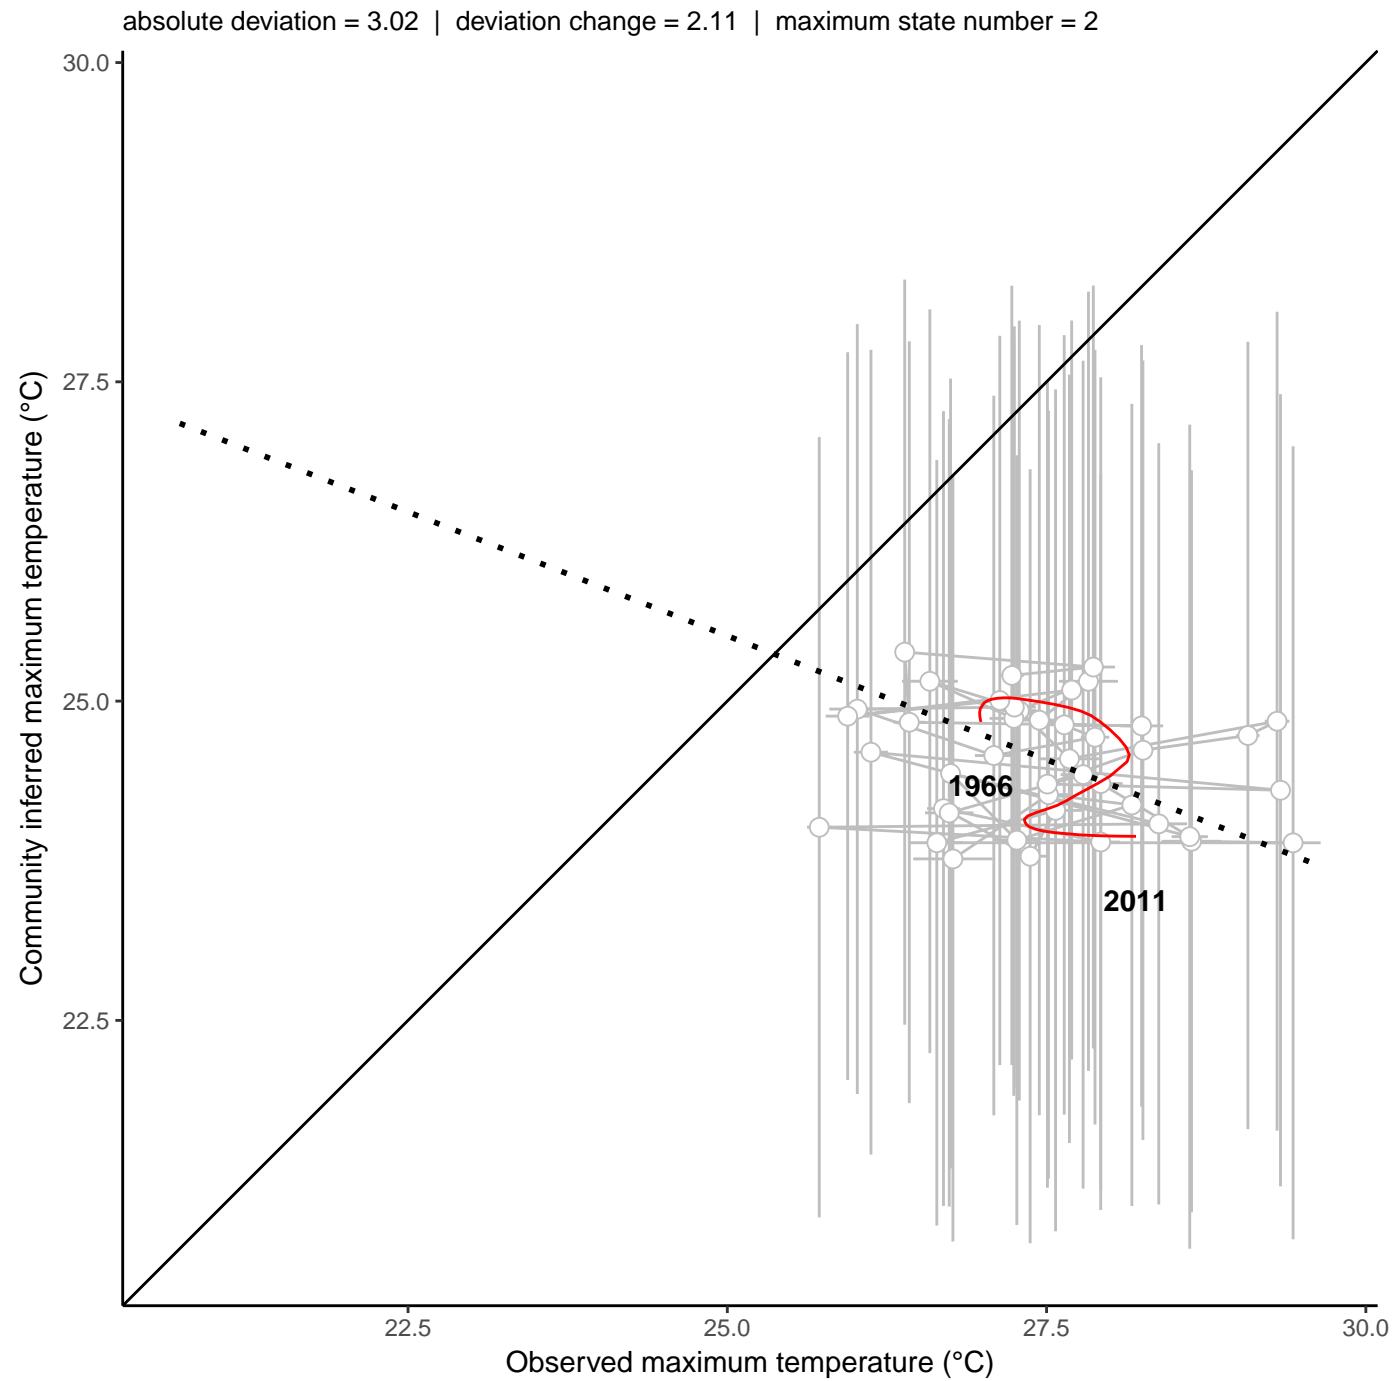

site : 840\_50\_3

absolute deviation = 1.94 | deviation change = 1.85 | maximum state number = 2

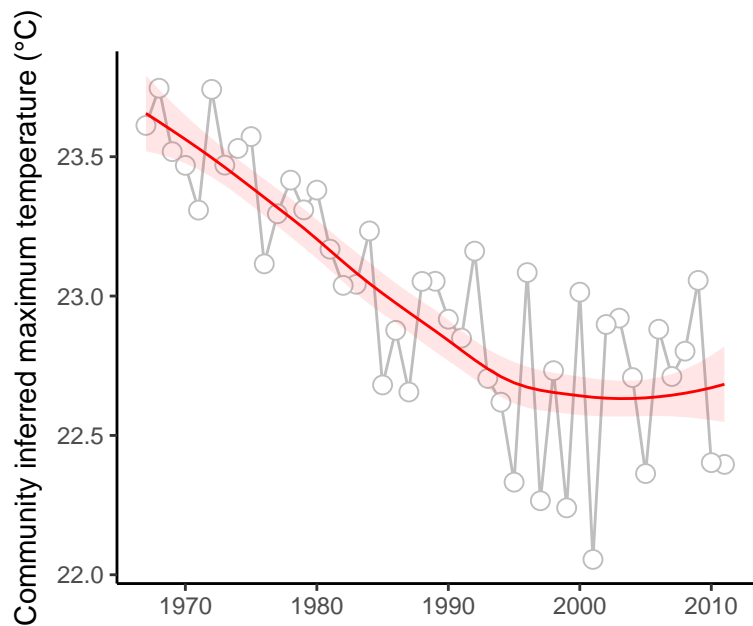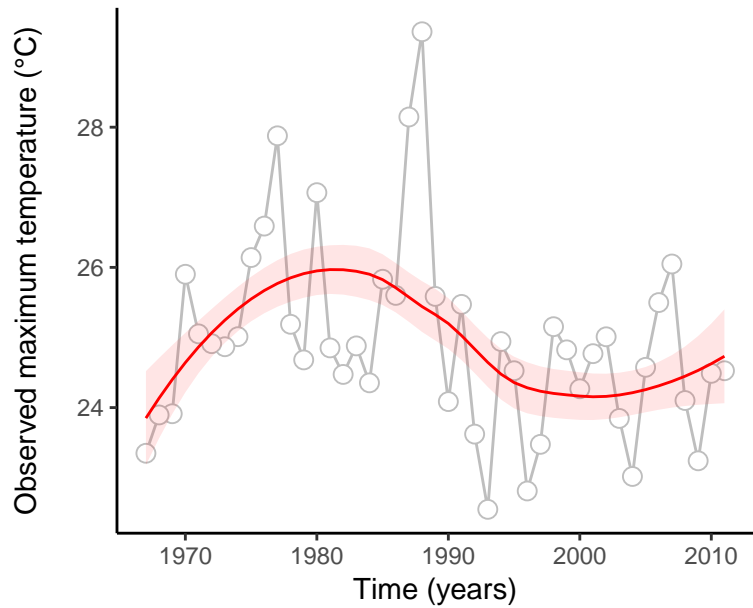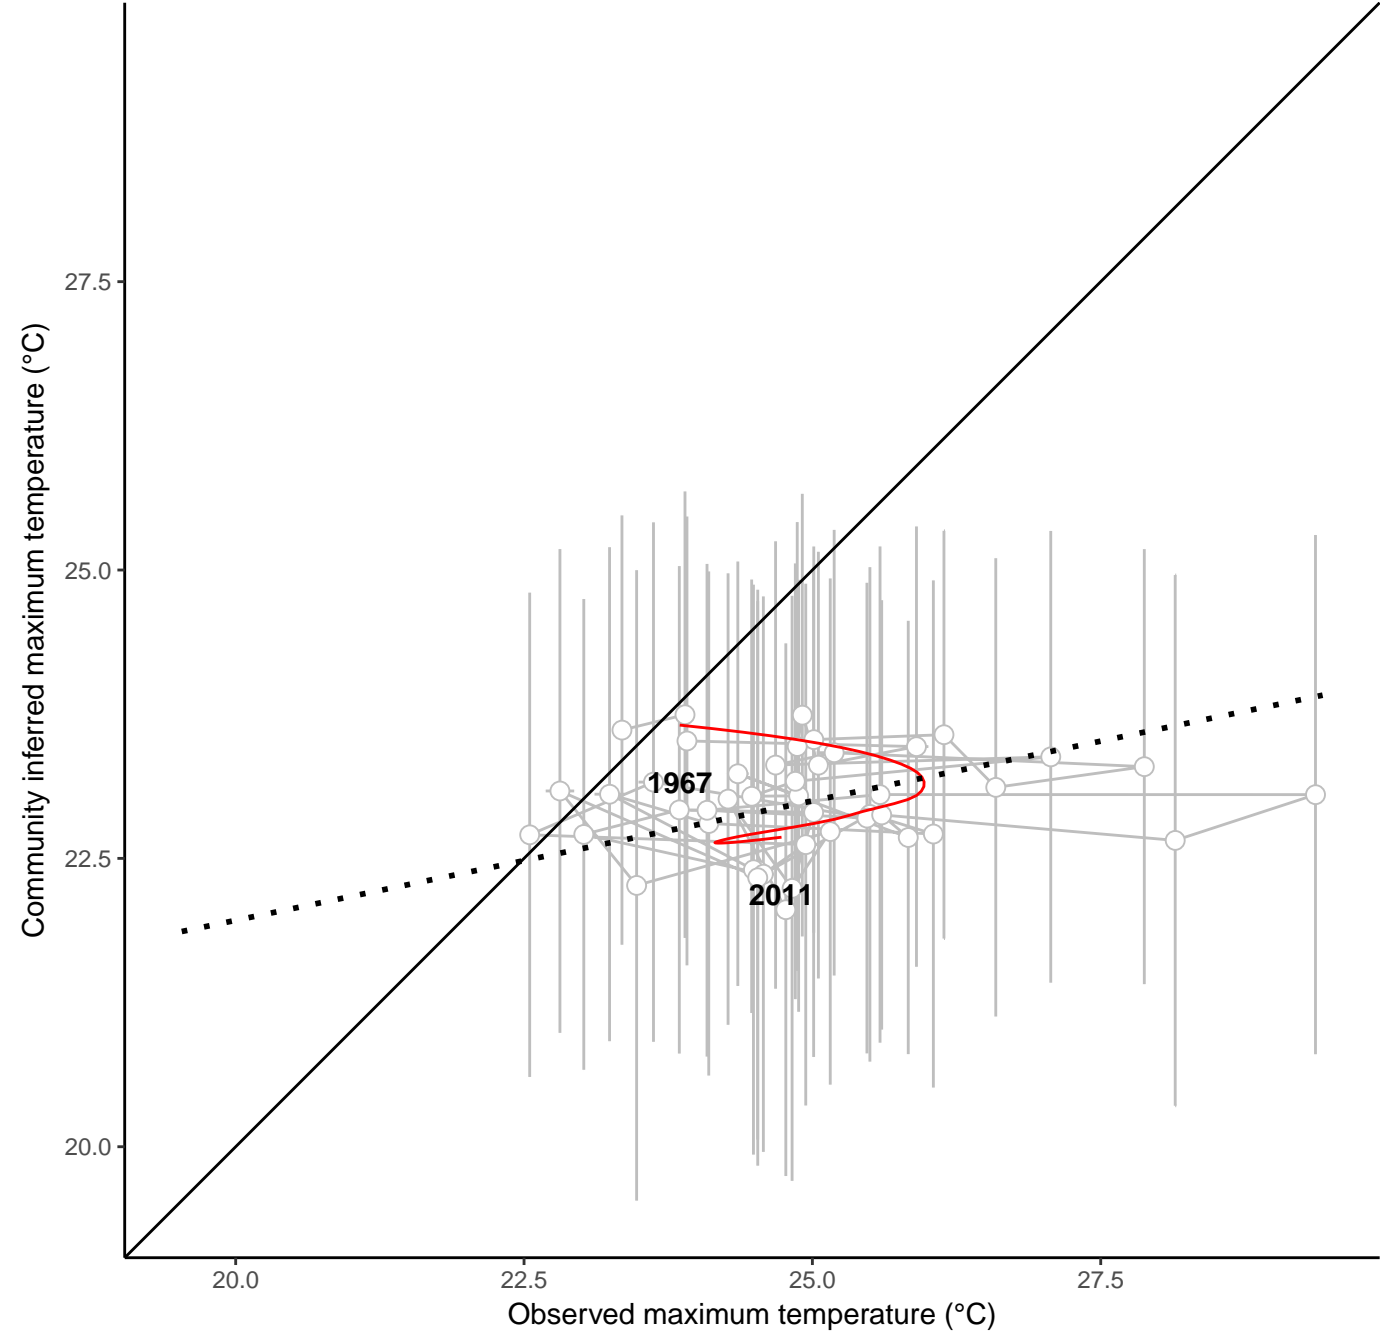

site : 840\_53\_14

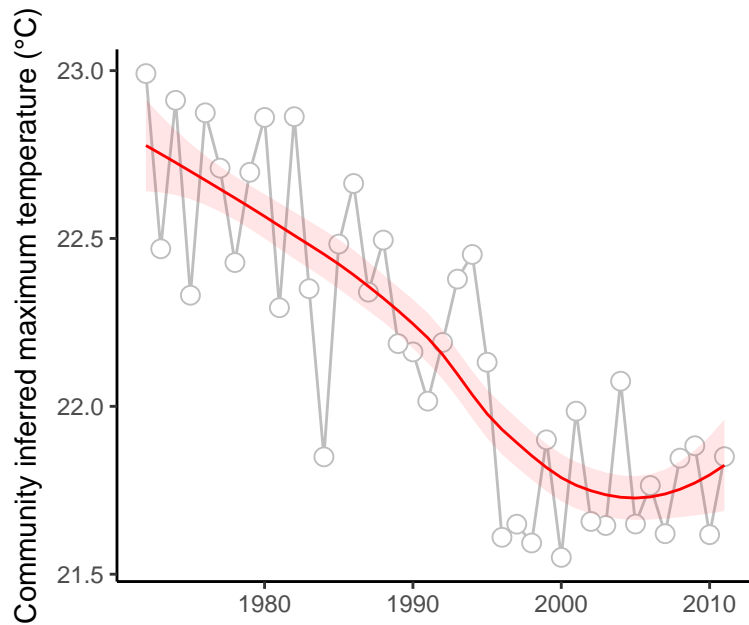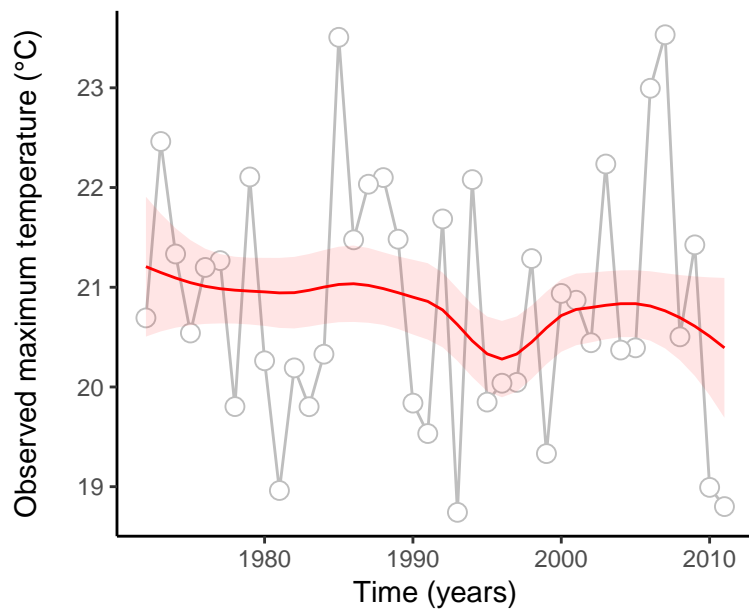

absolute deviation = 1.37 | deviation change = -0.14 | maximum state number = 1

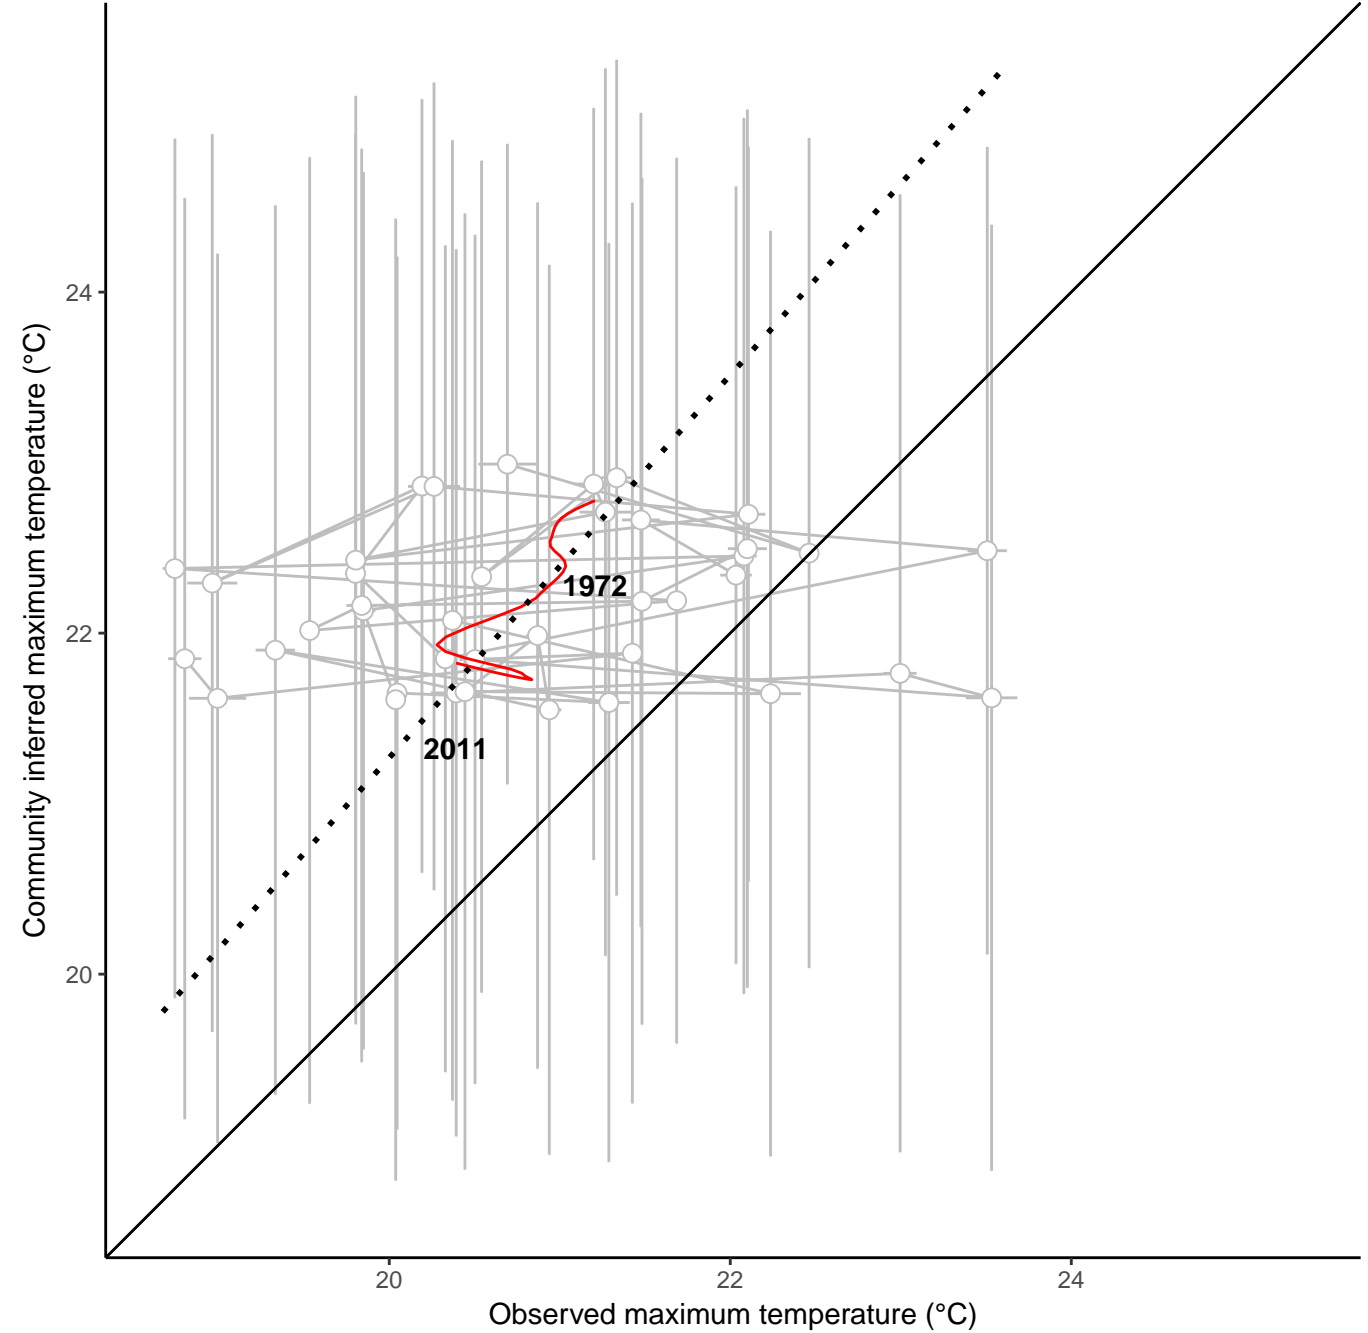

site : 840\_61\_38

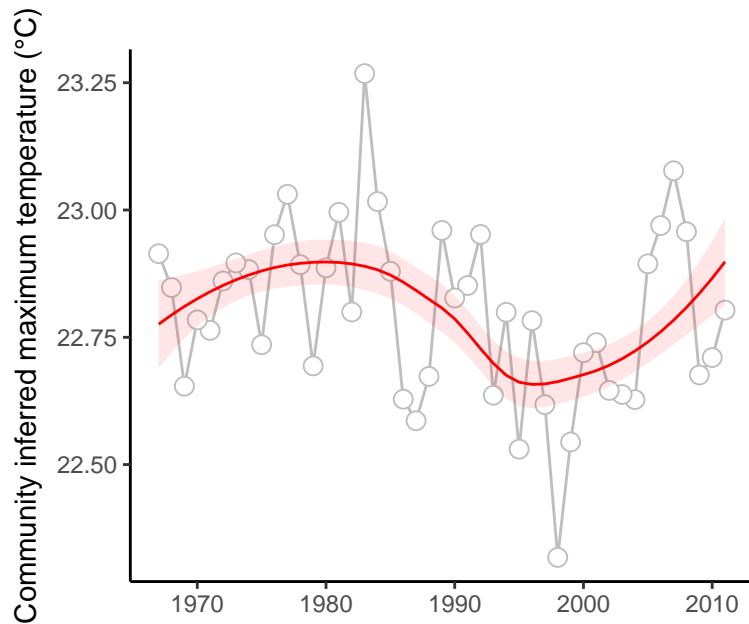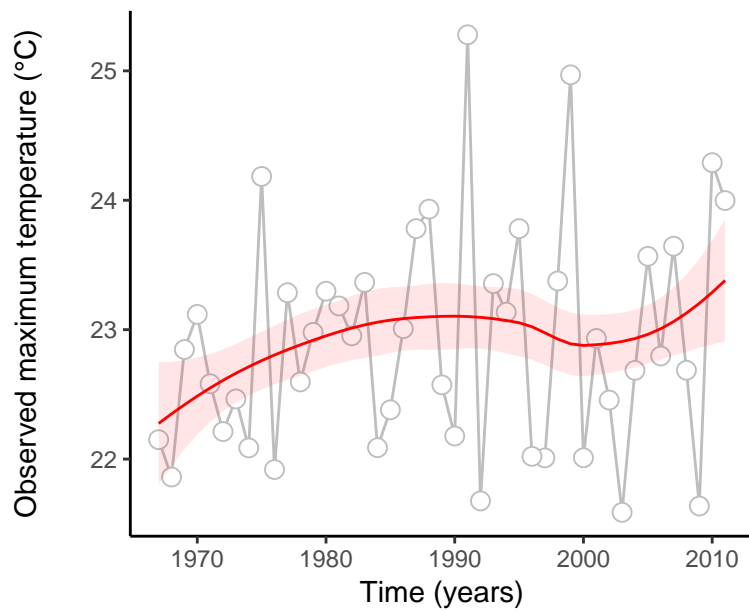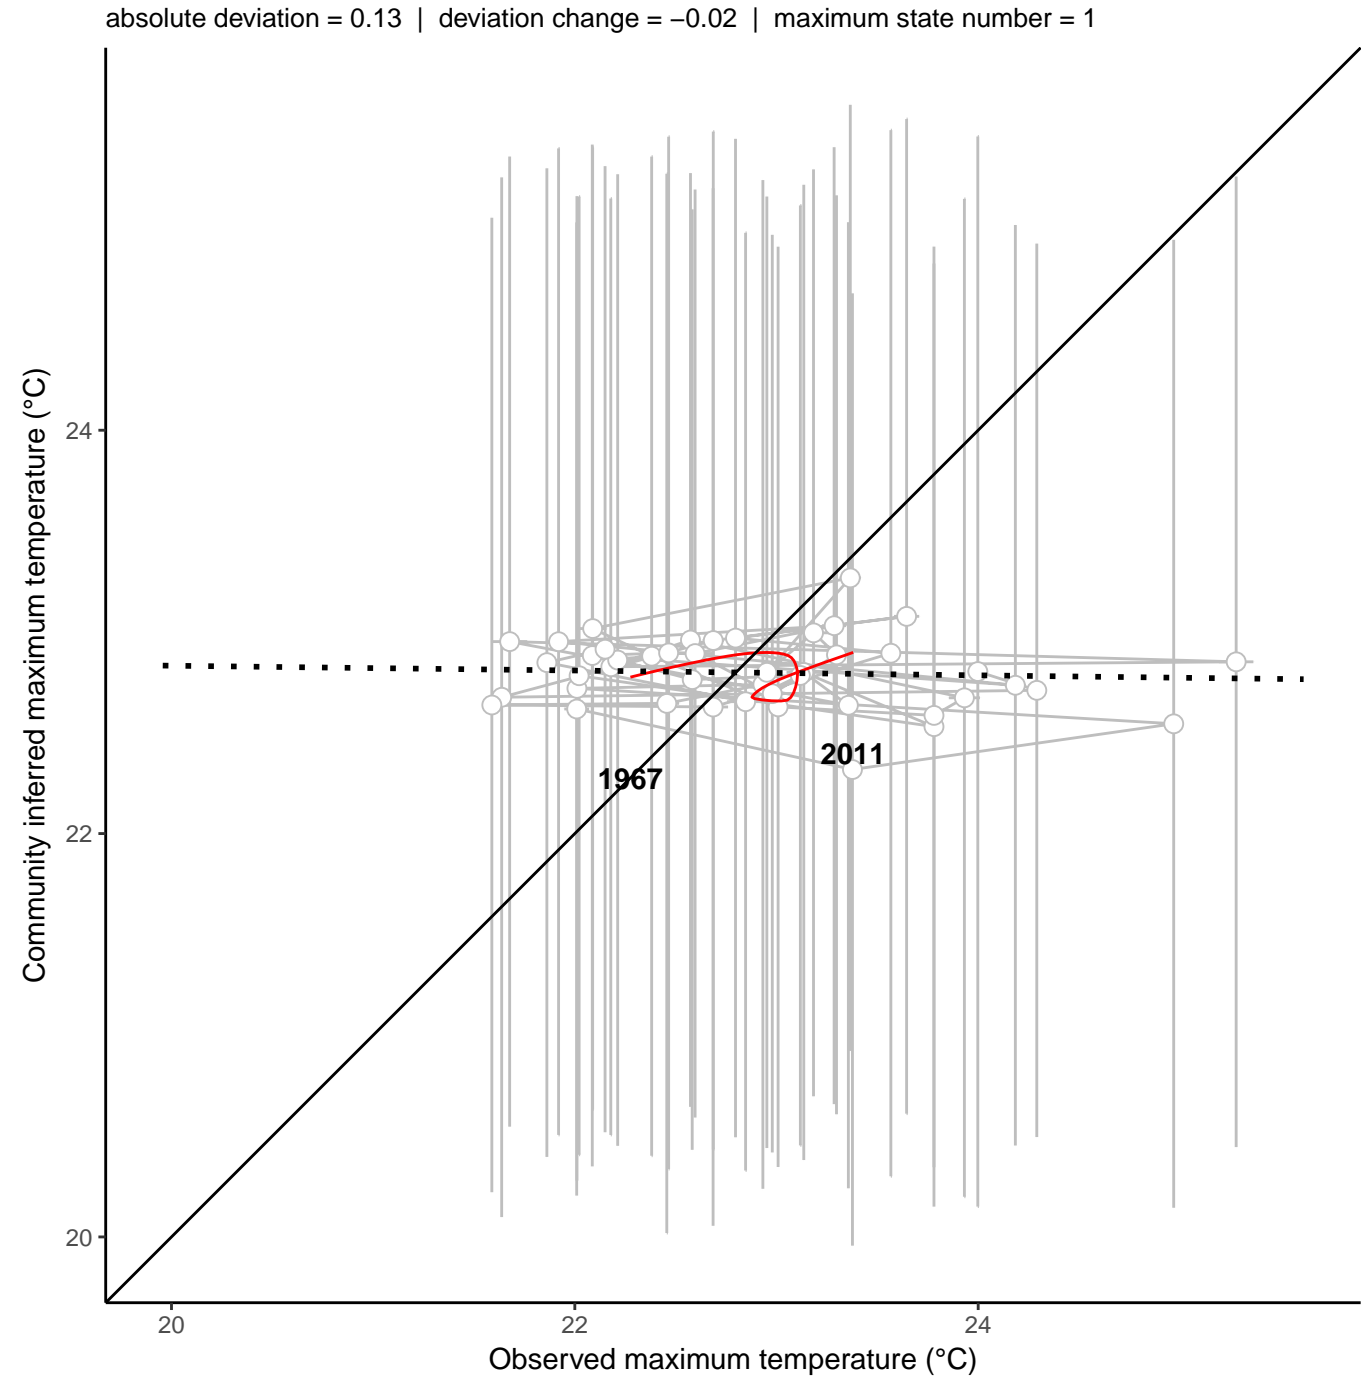



site : 840\_61\_65

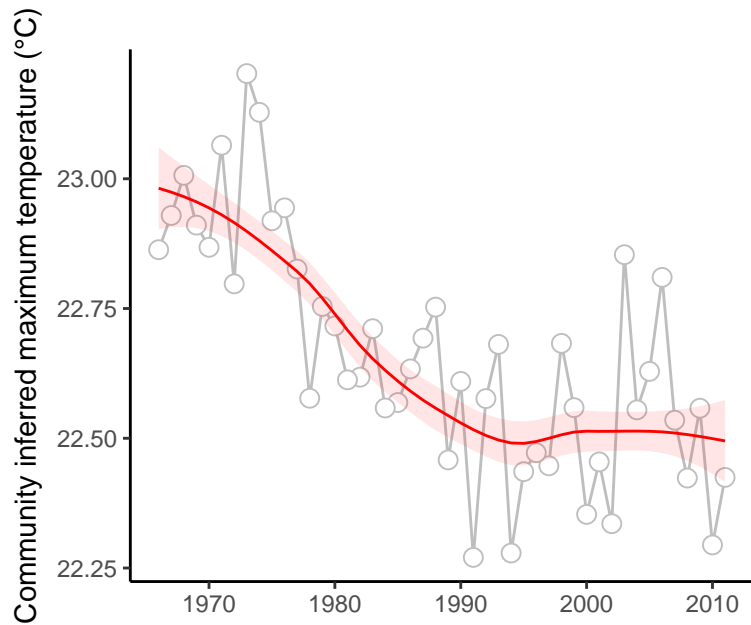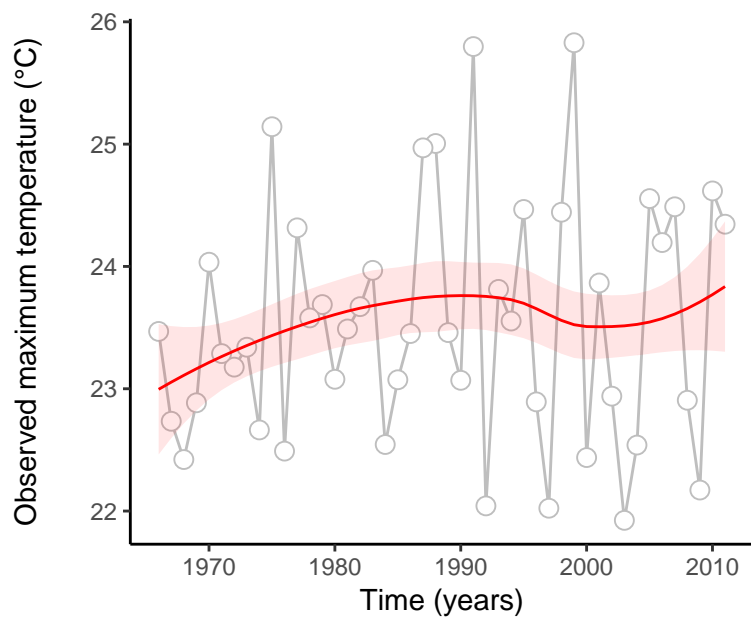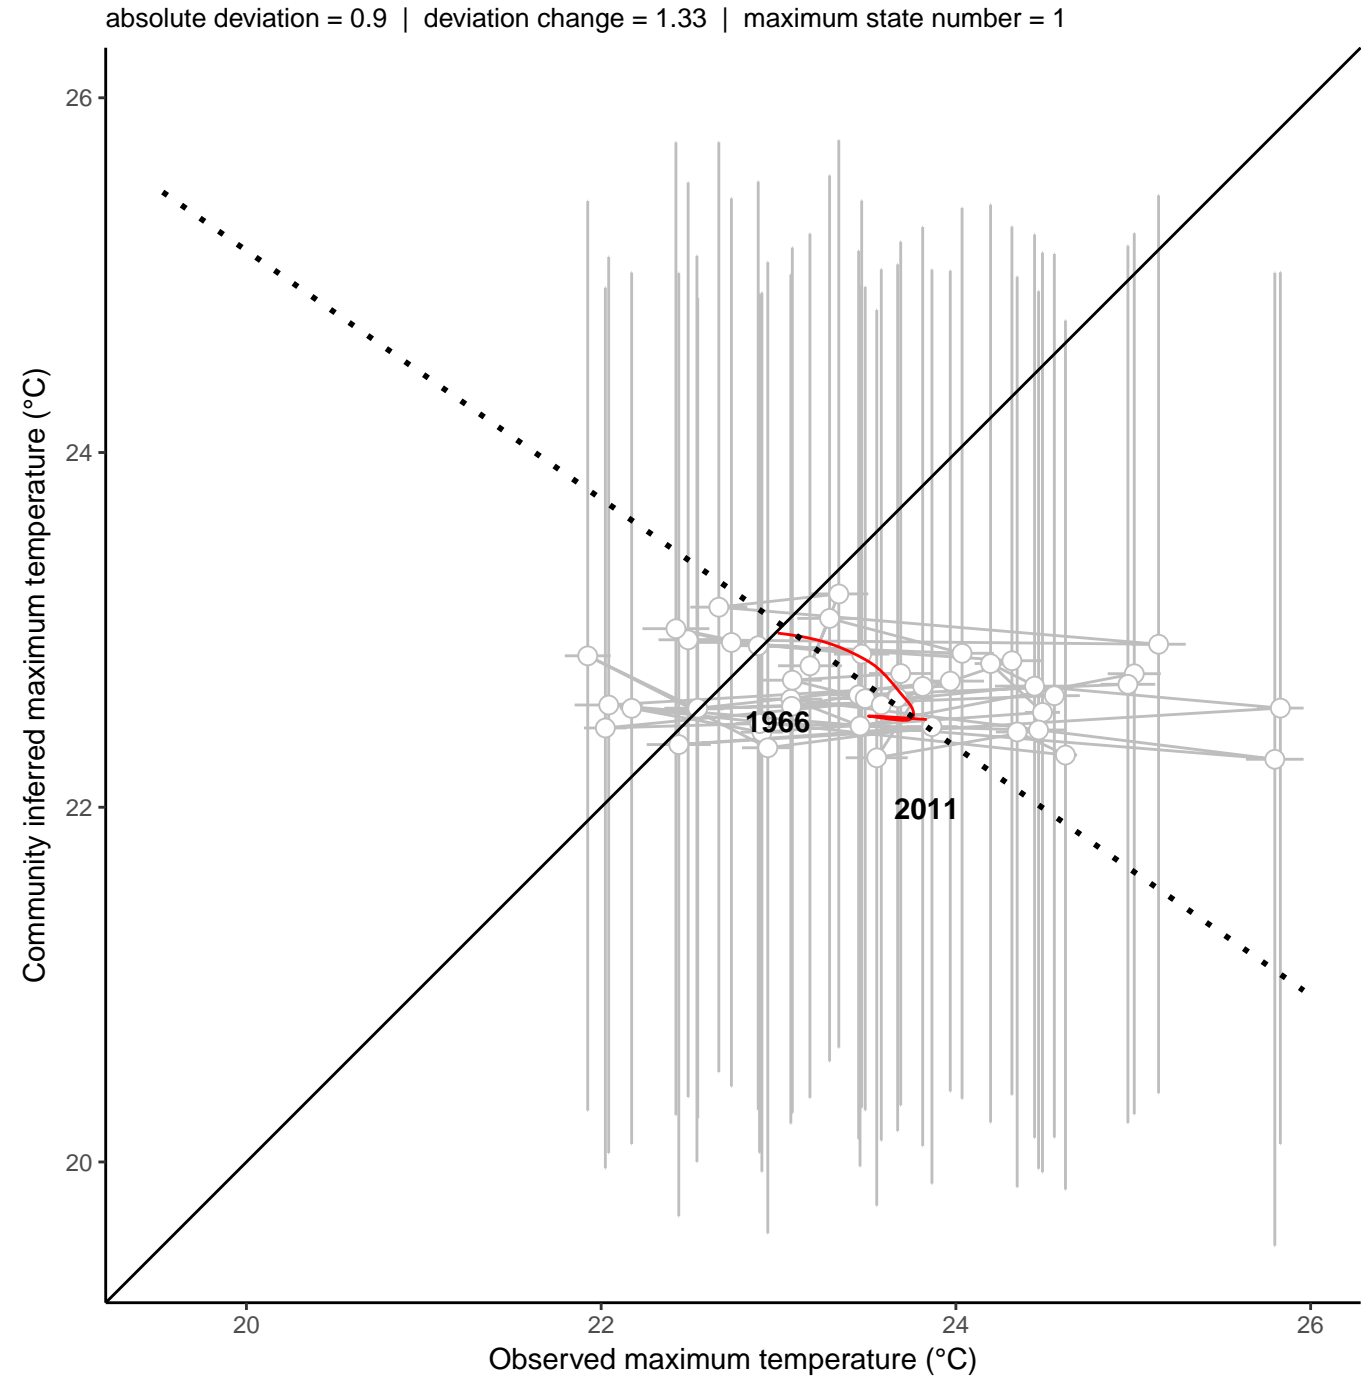

site : 840\_64\_27

absolute deviation = 2.19 | deviation change = 0.44 | maximum state number = 2

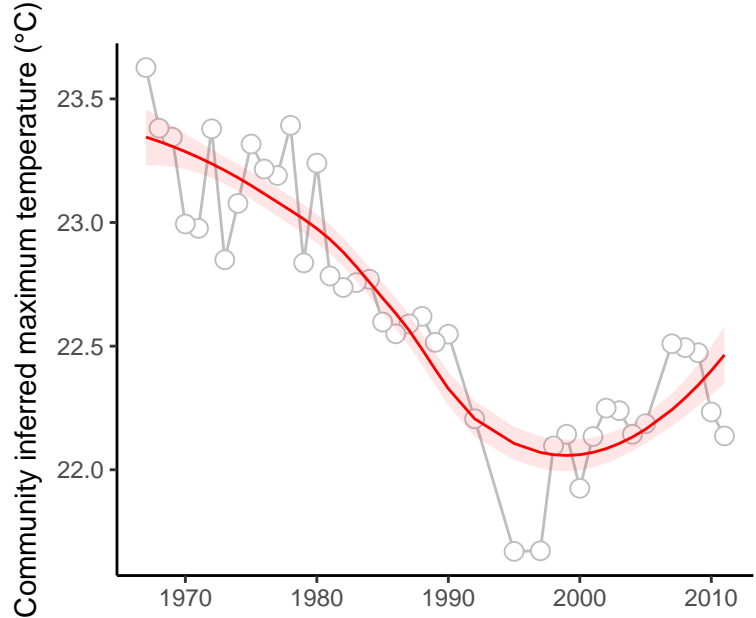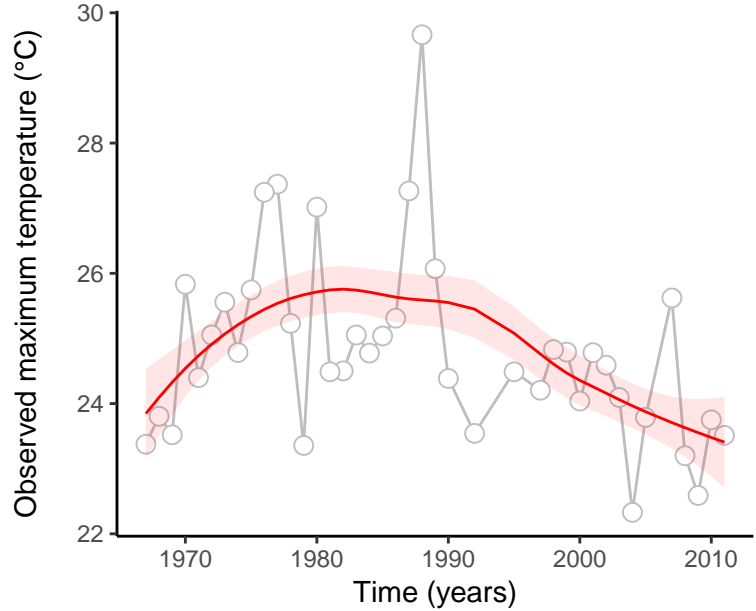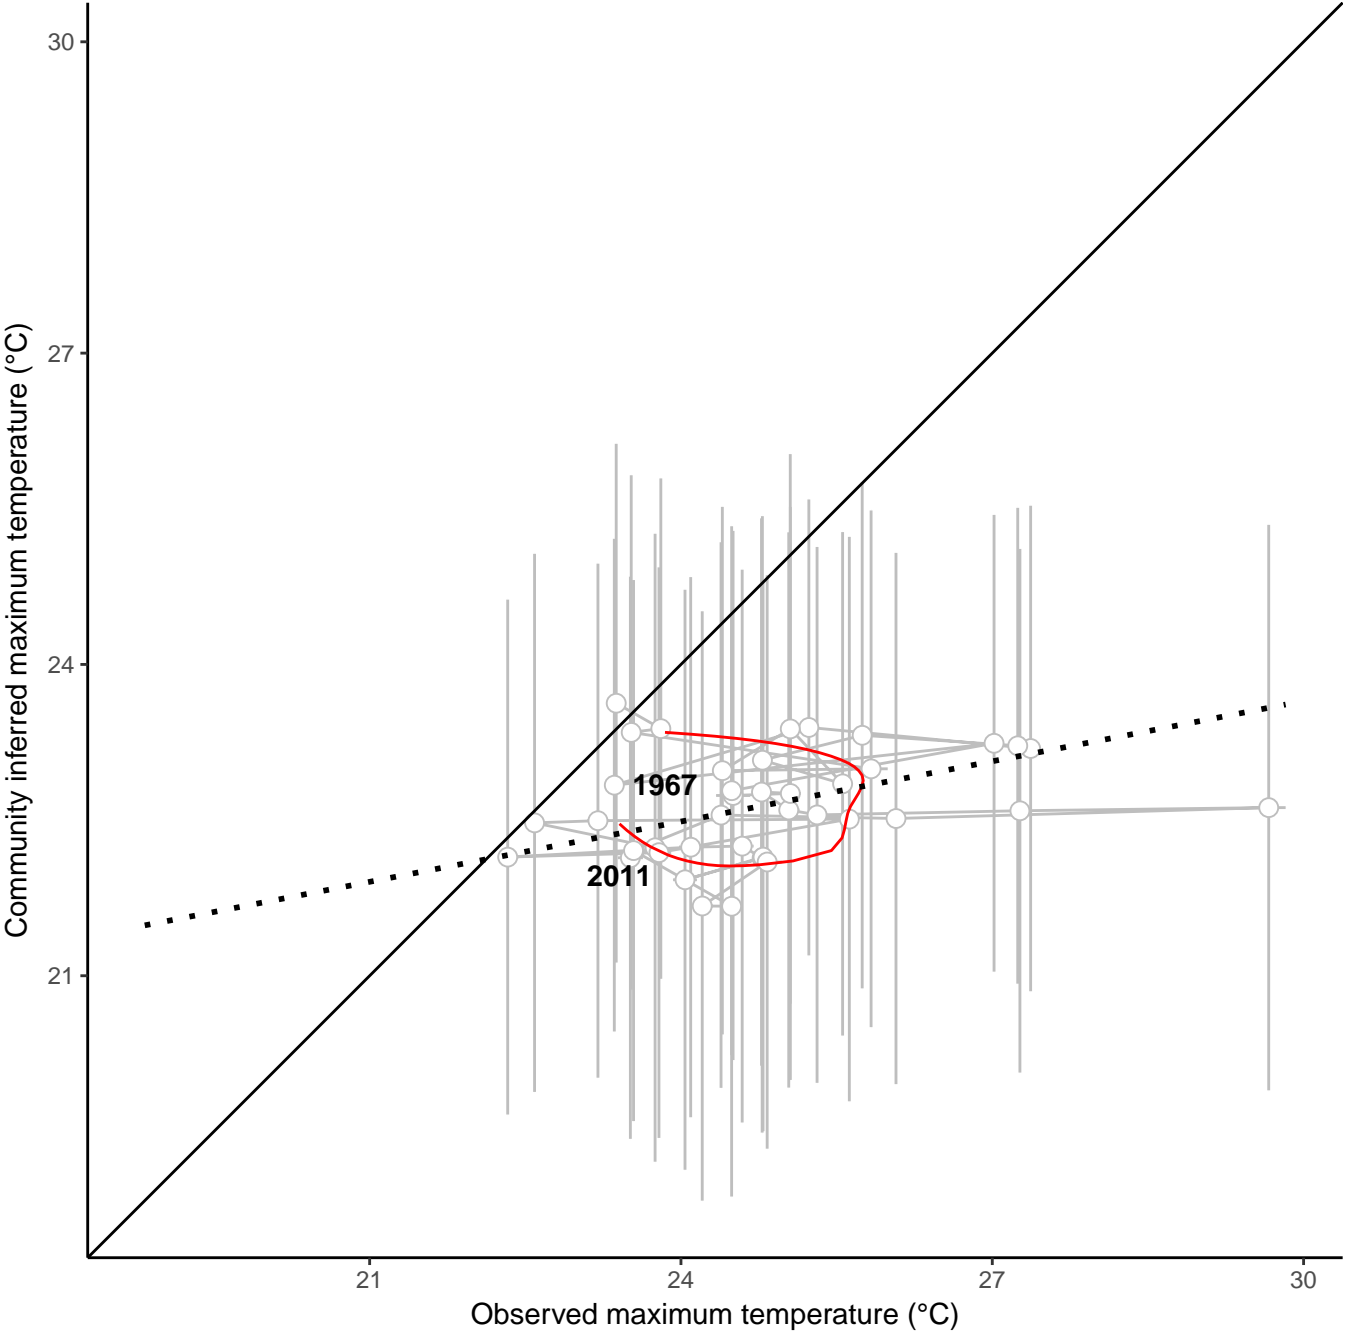

site : 840\_67\_12

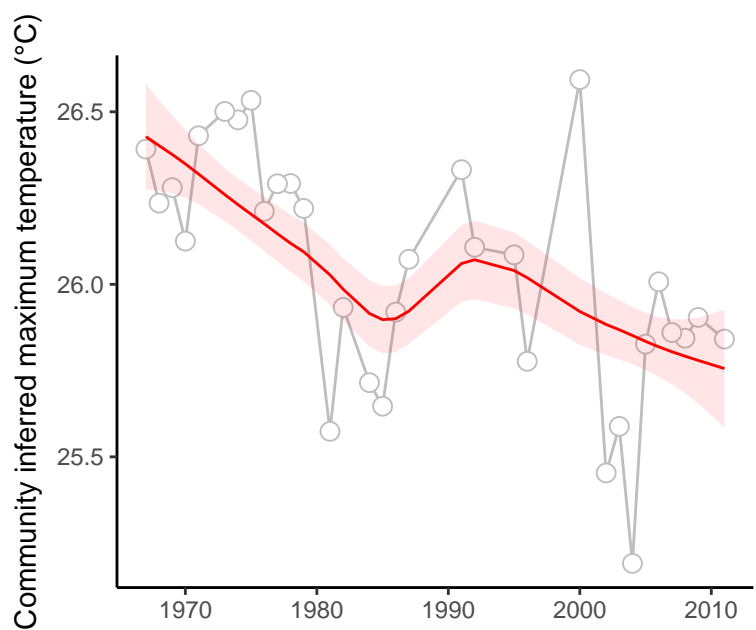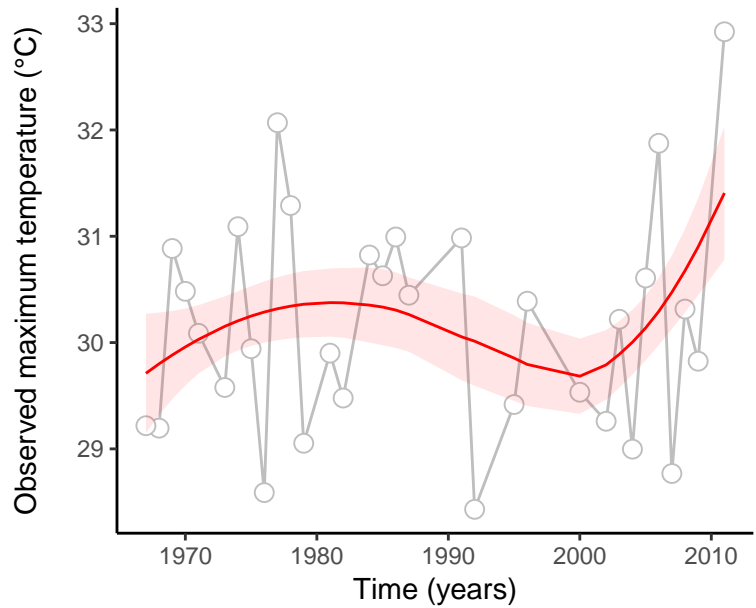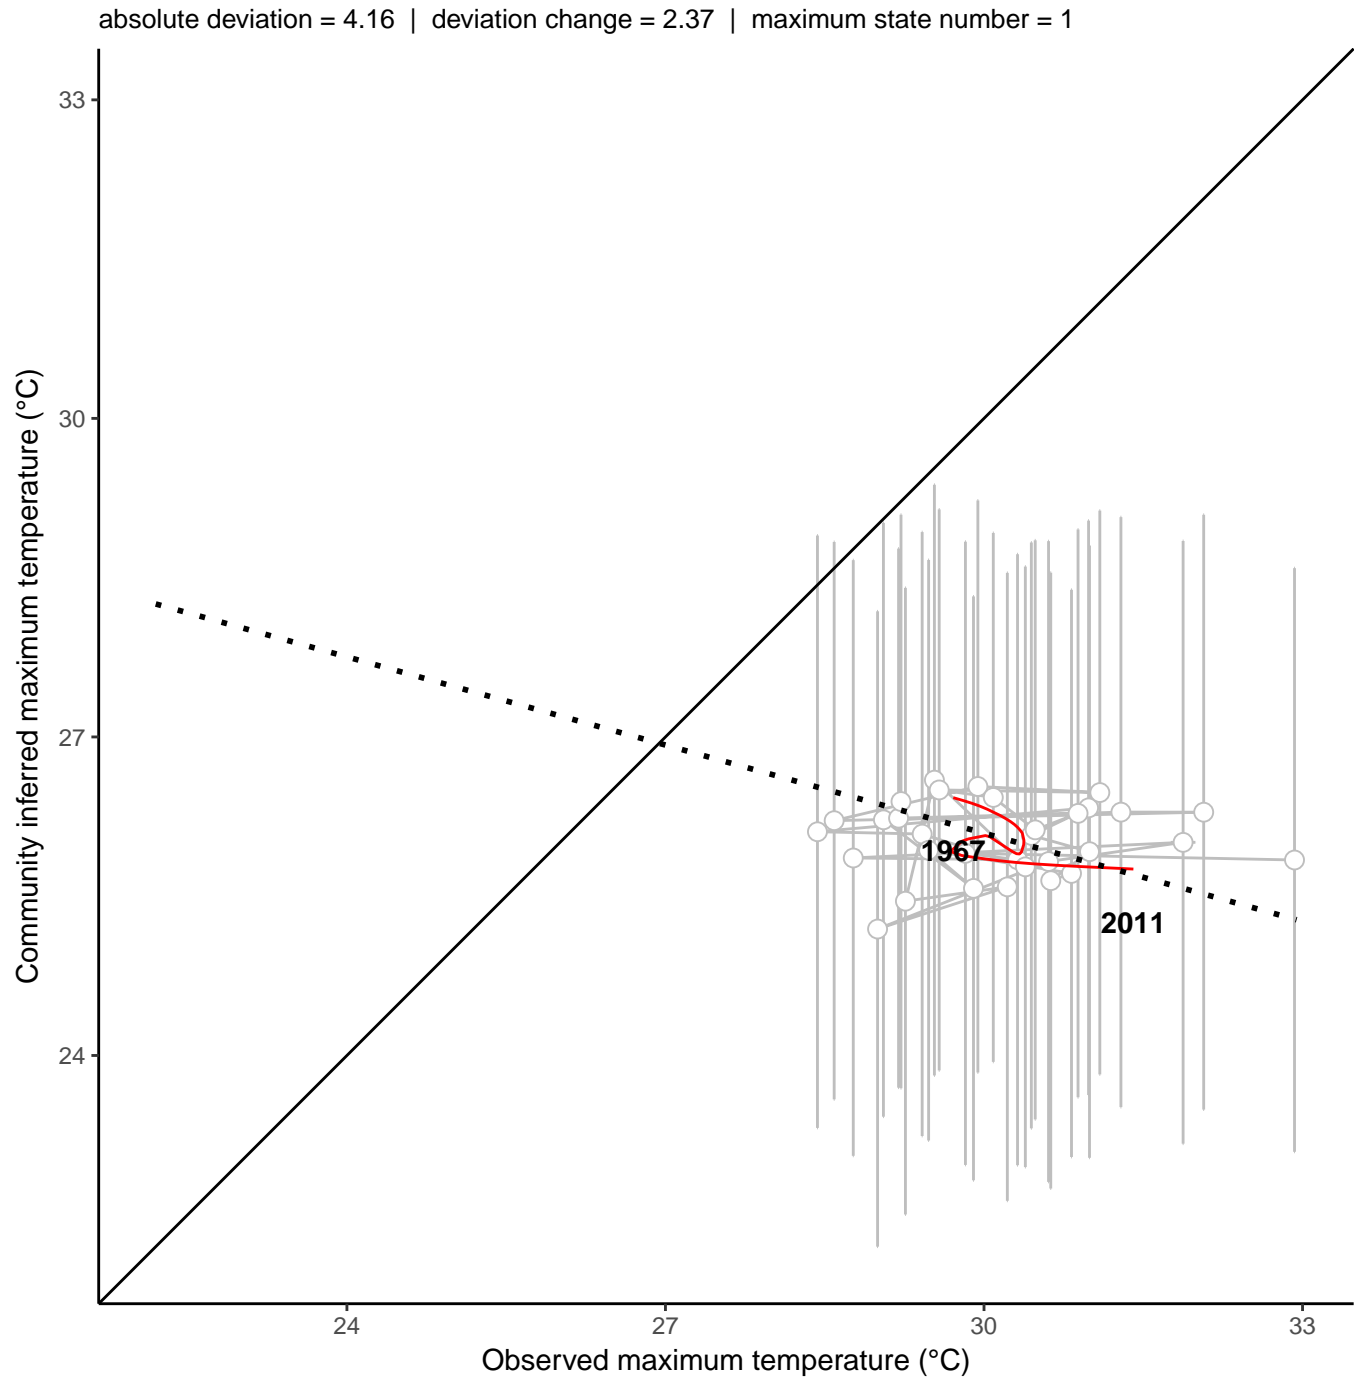

site : 840\_82\_40

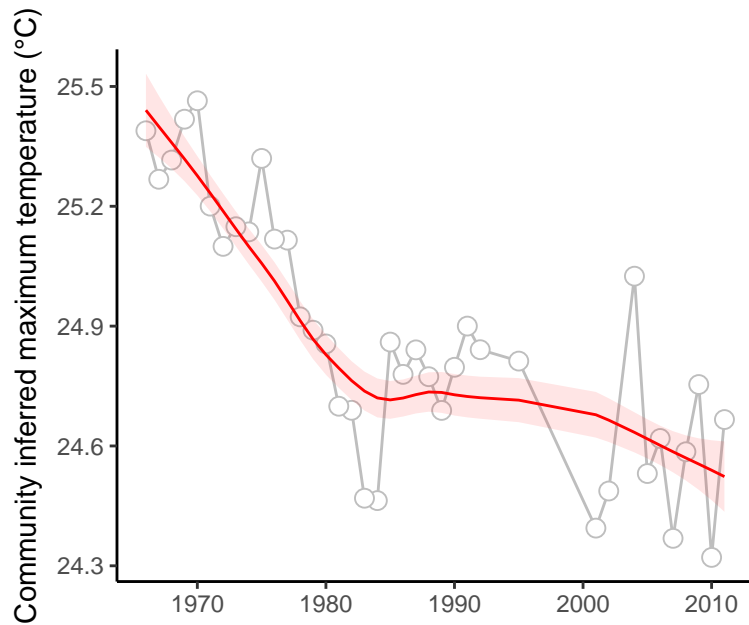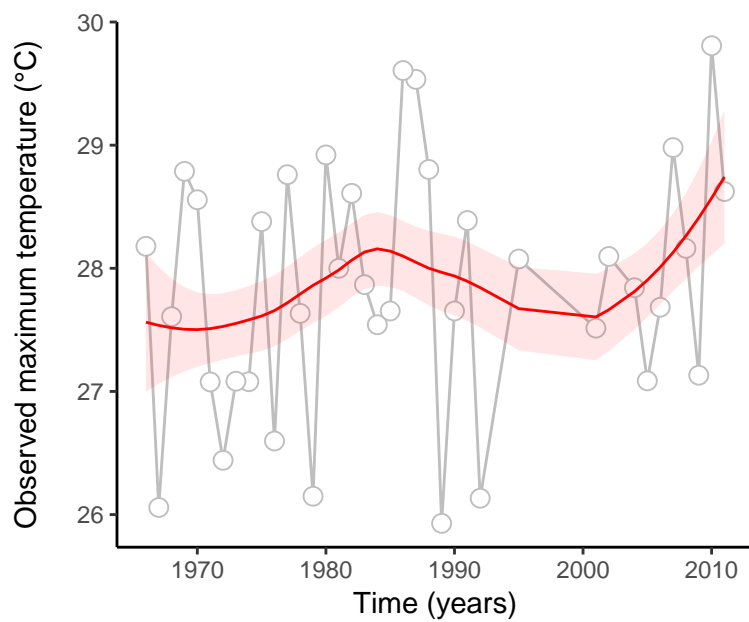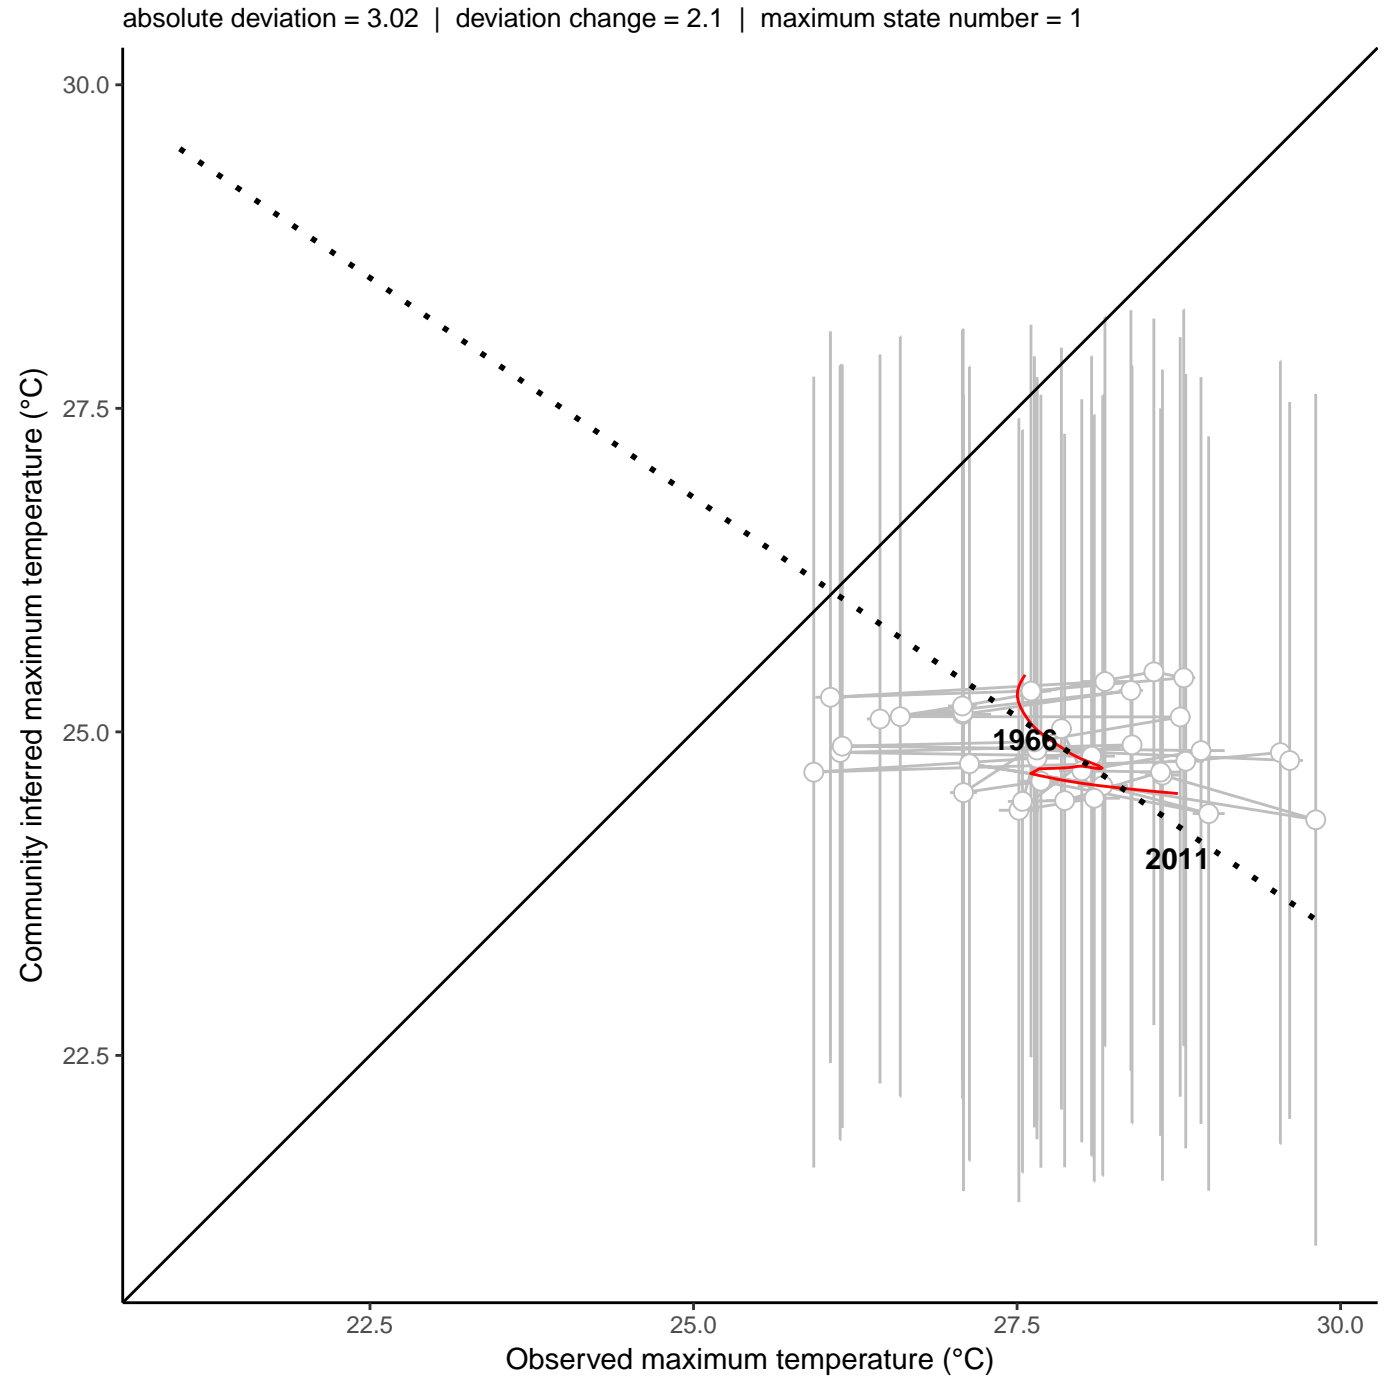

site : 840\_83\_75

absolute deviation = 5.36 | deviation change = 2.11 | maximum state number = 1

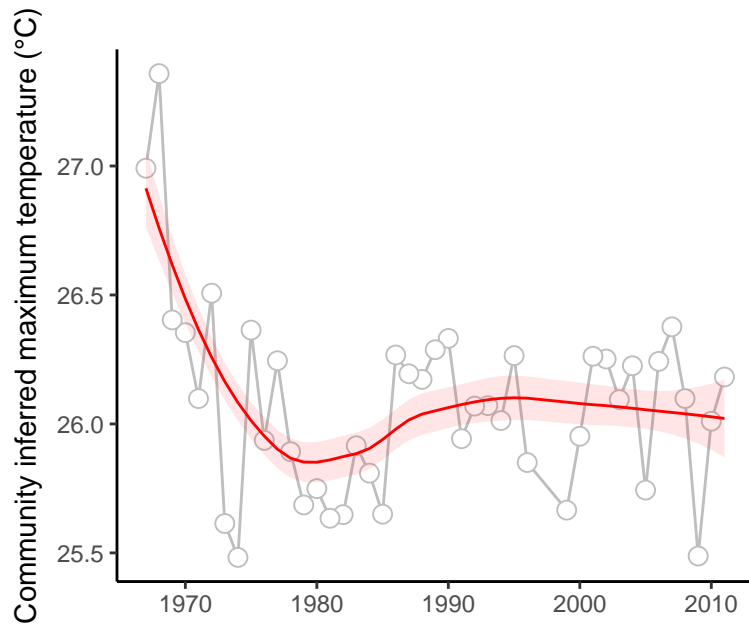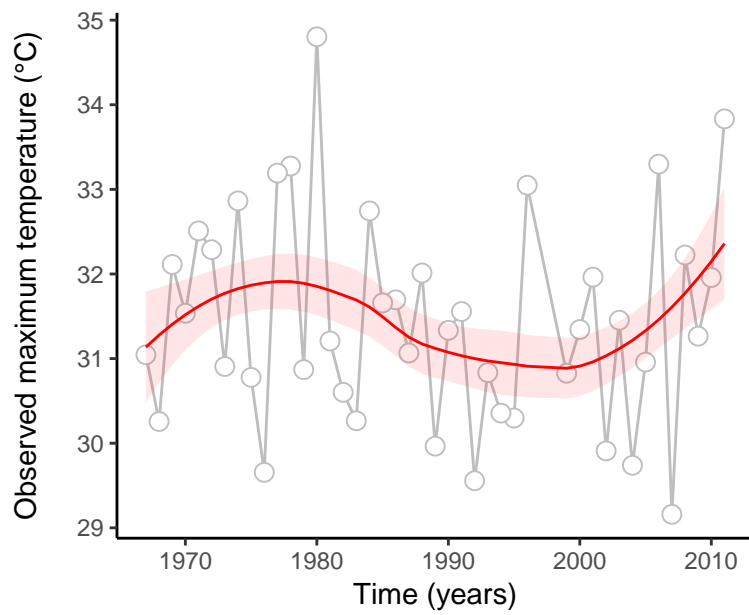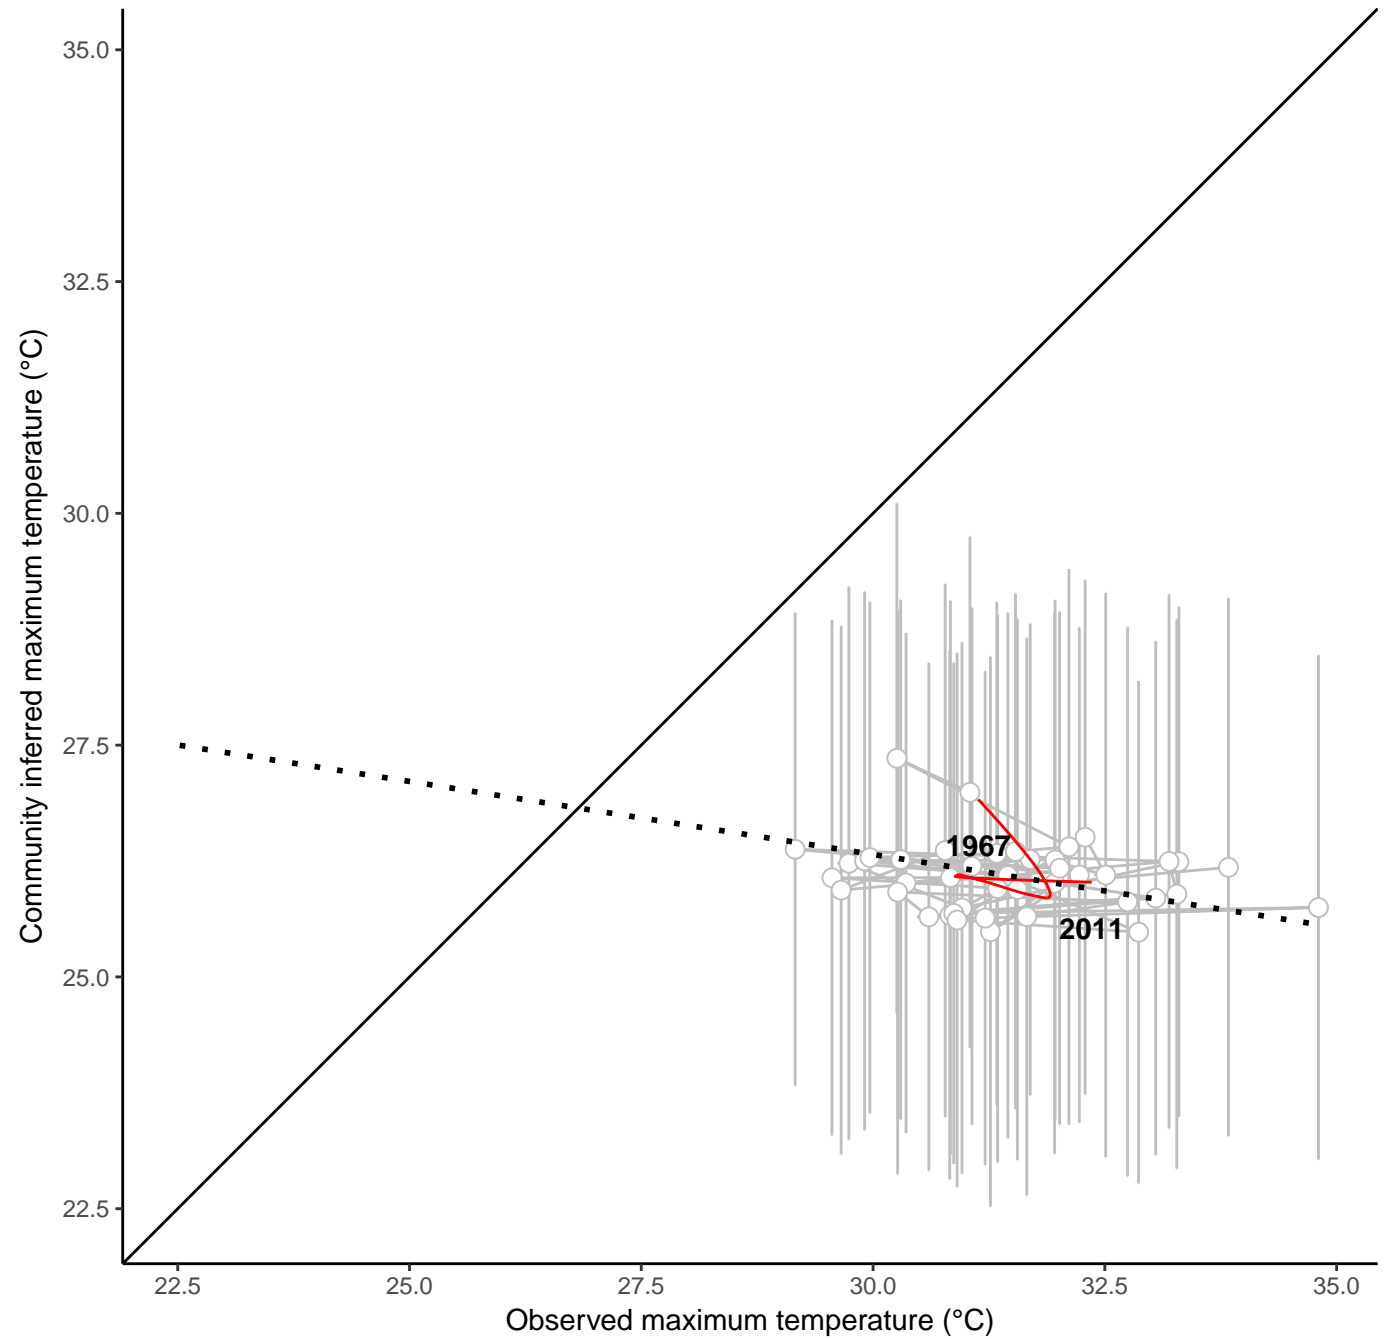

site : 840\_90\_24

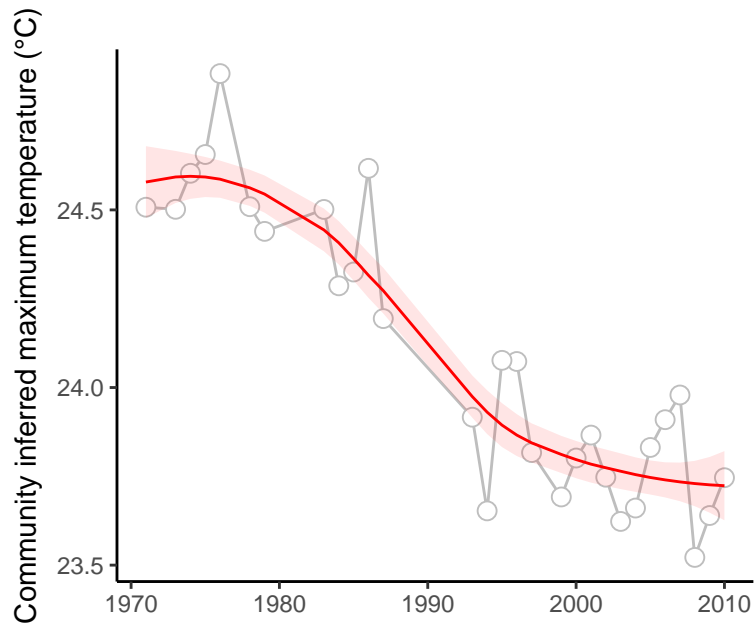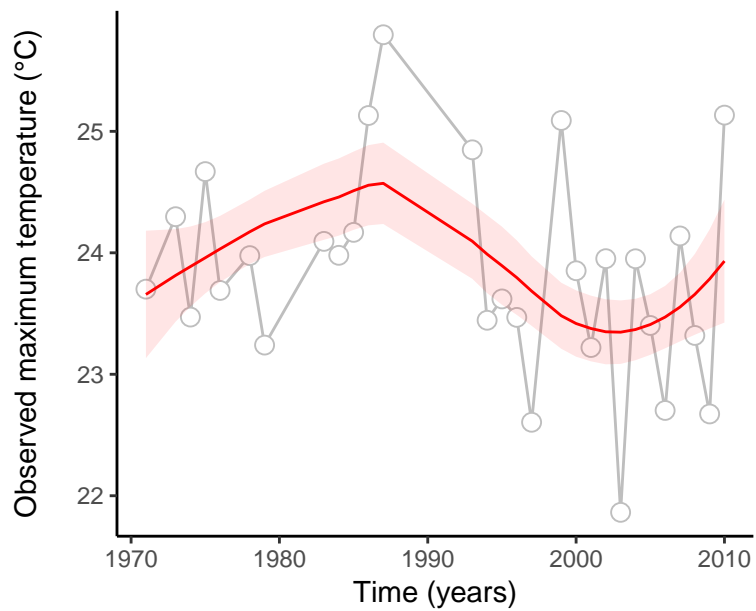

absolute deviation = 0.23 | deviation change = -0.71 | maximum state number = 2

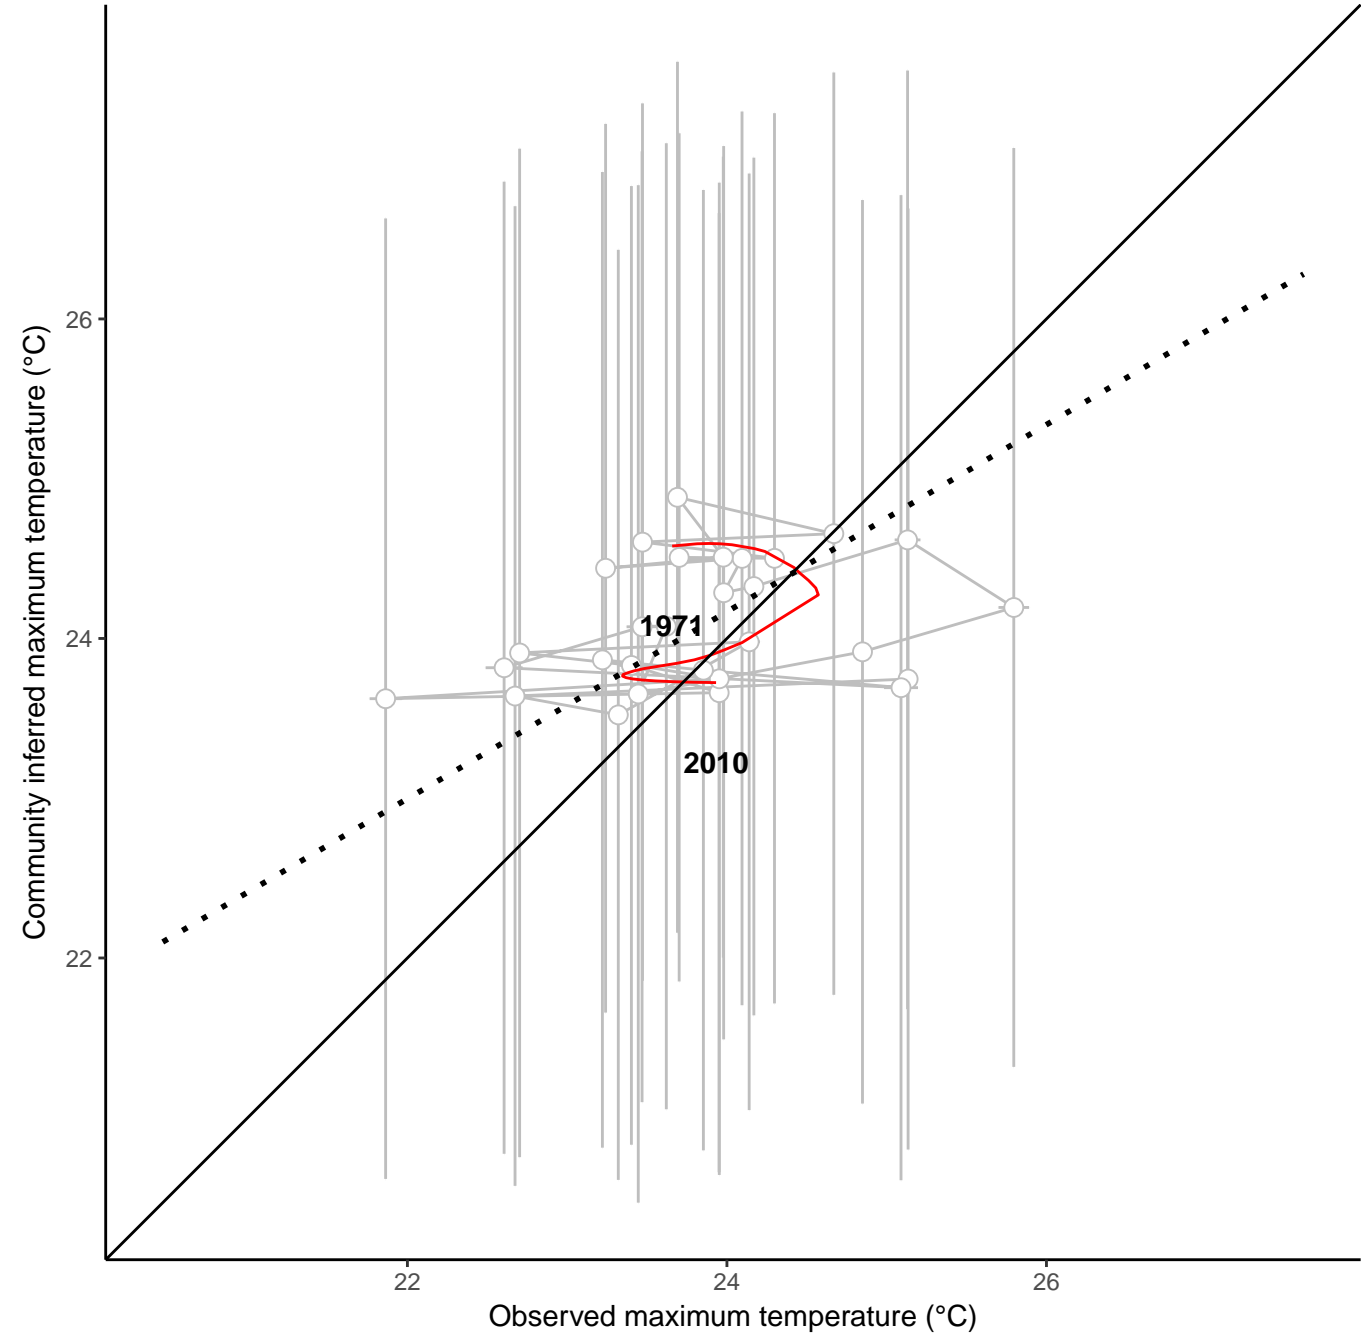

site : 840\_91\_53

absolute deviation = 1.23 | deviation change = 0.67 | maximum state number = 1

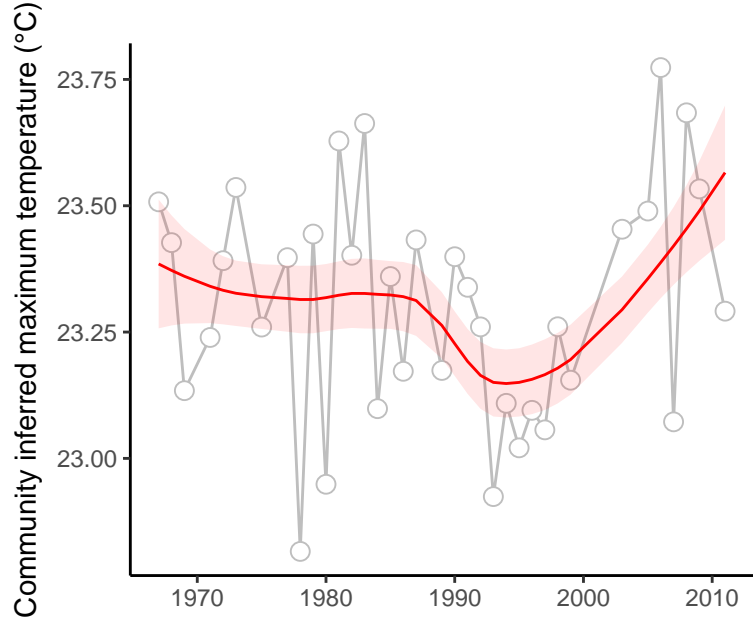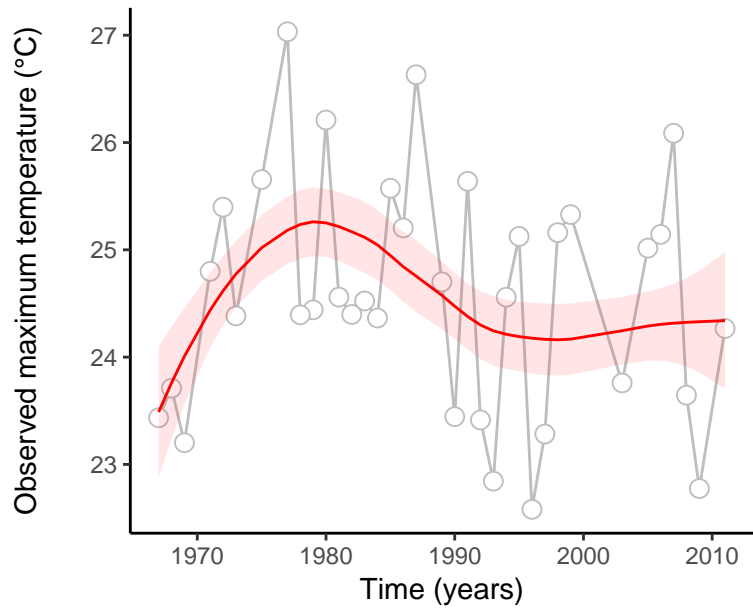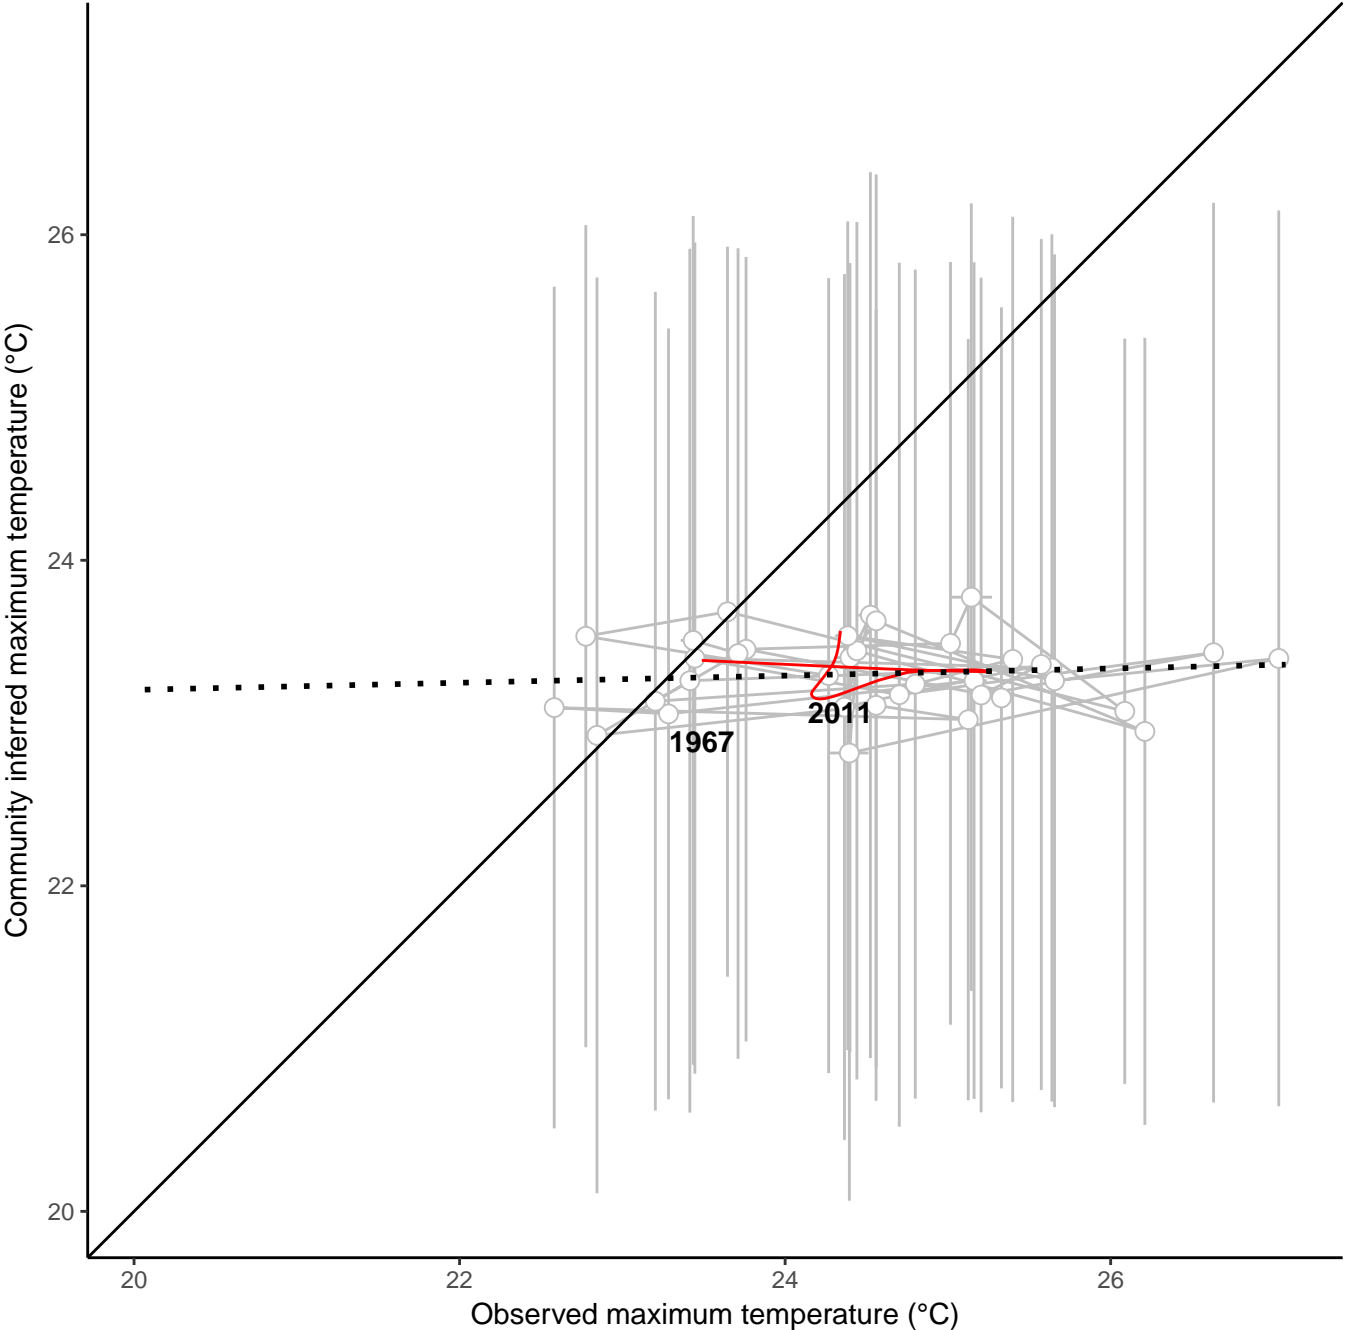

site : 840\_14\_52

absolute deviation = 3.8 | deviation change = -0.59 | maximum state number = 1

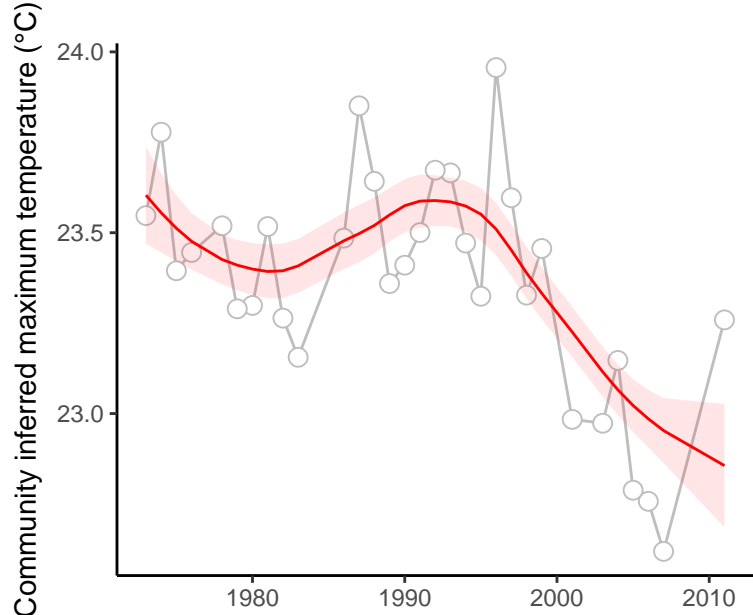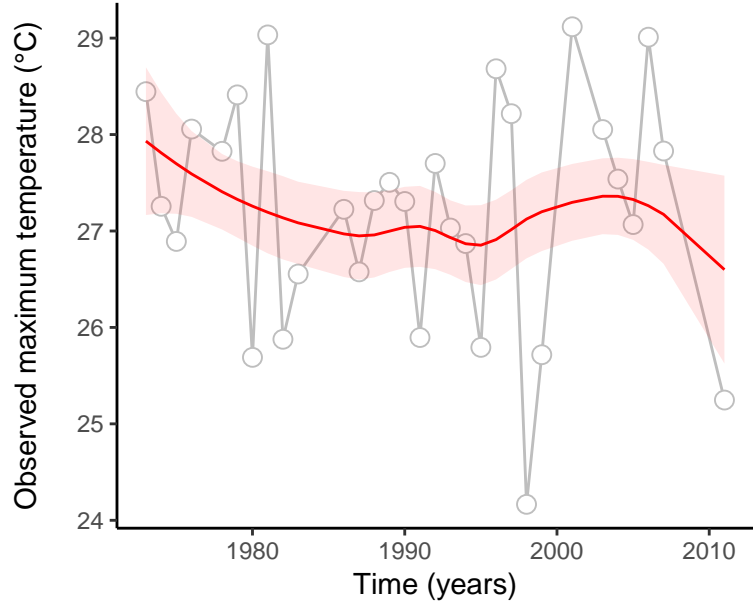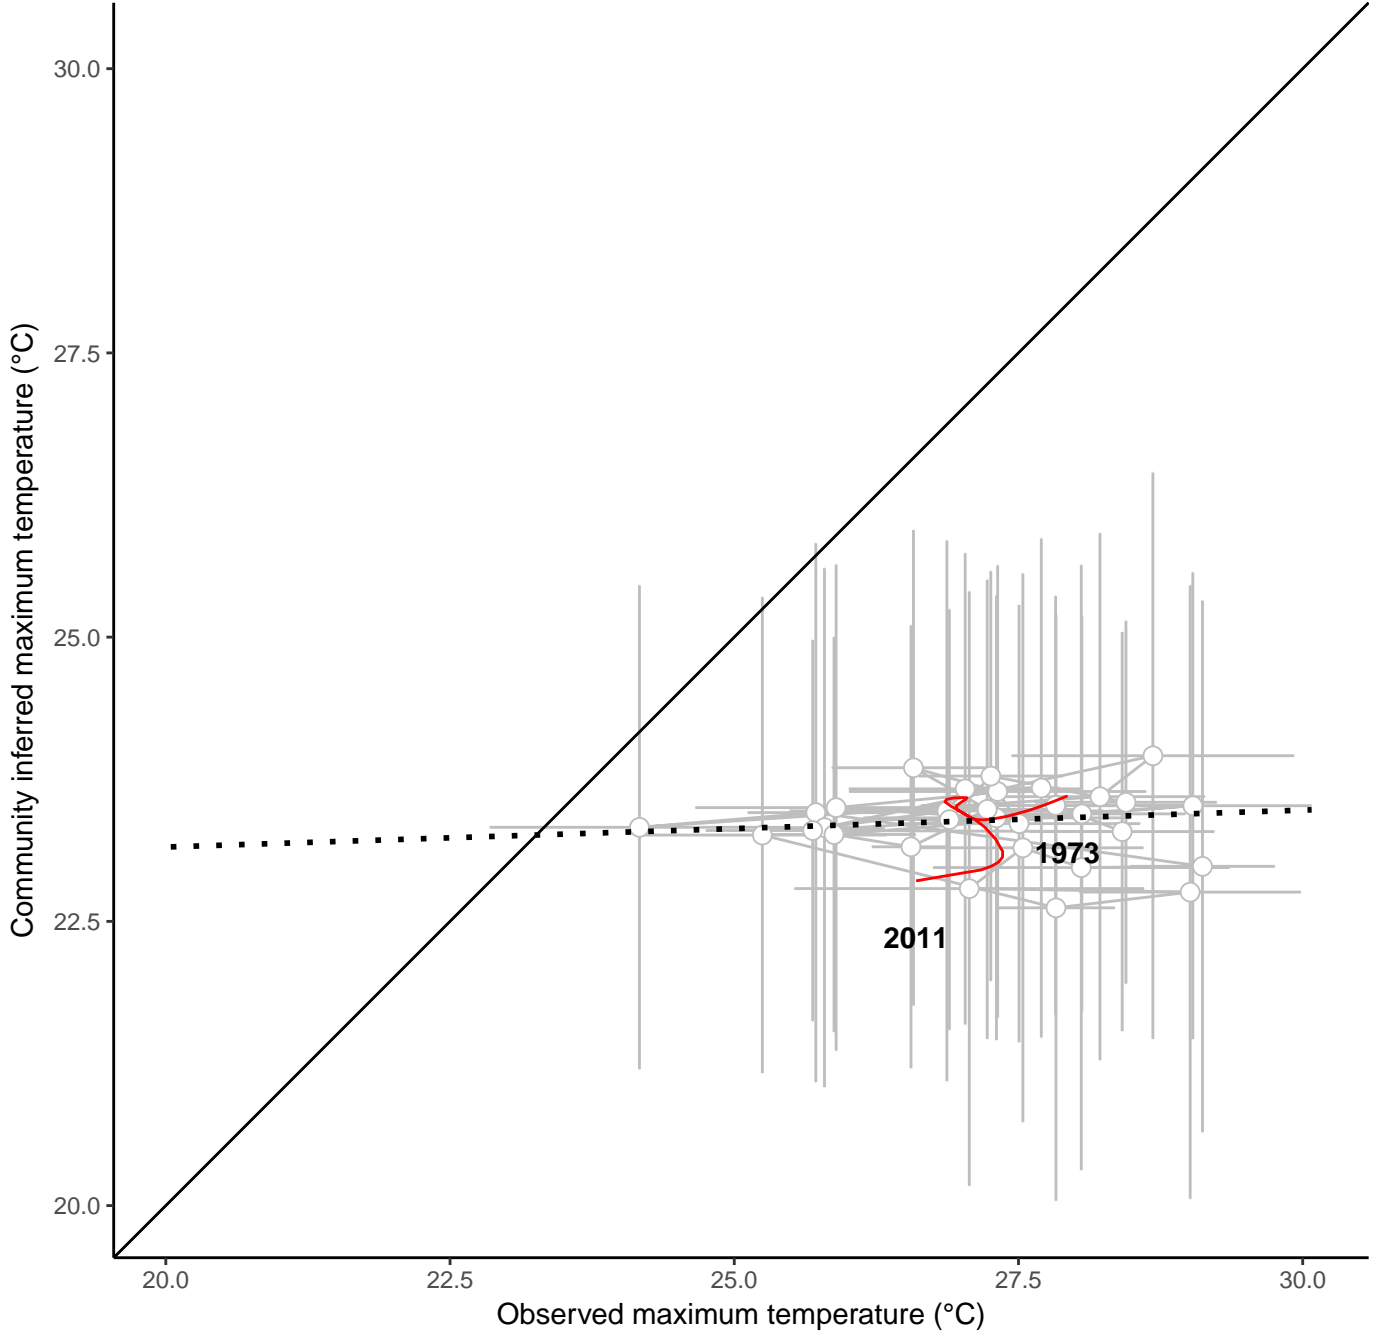



site : 840\_2\_27

absolute deviation = 4.57 | deviation change = 0.76 | maximum state number = 1

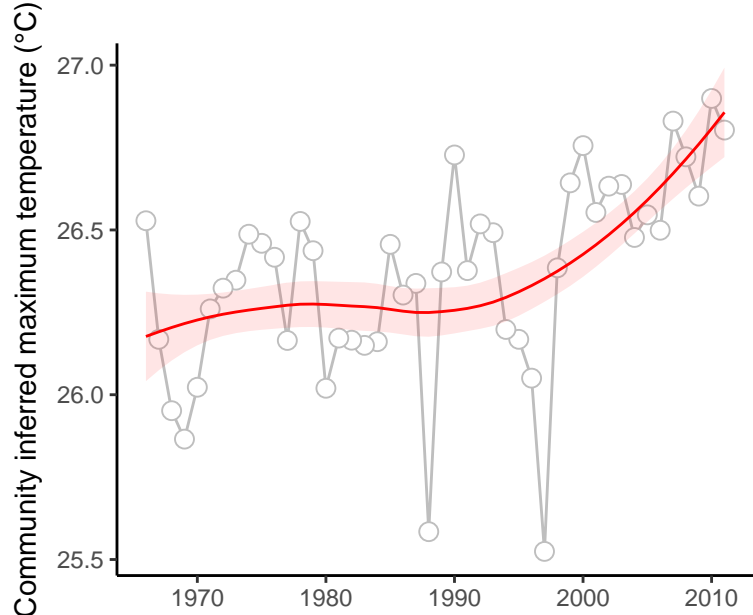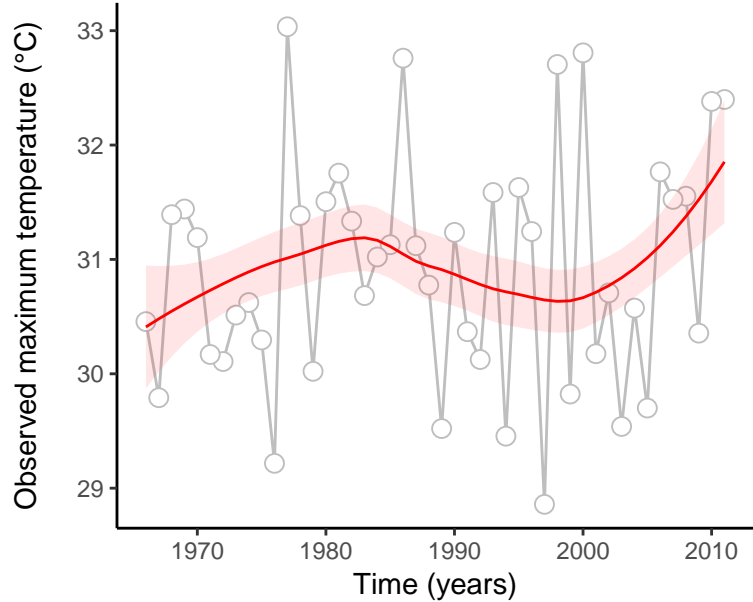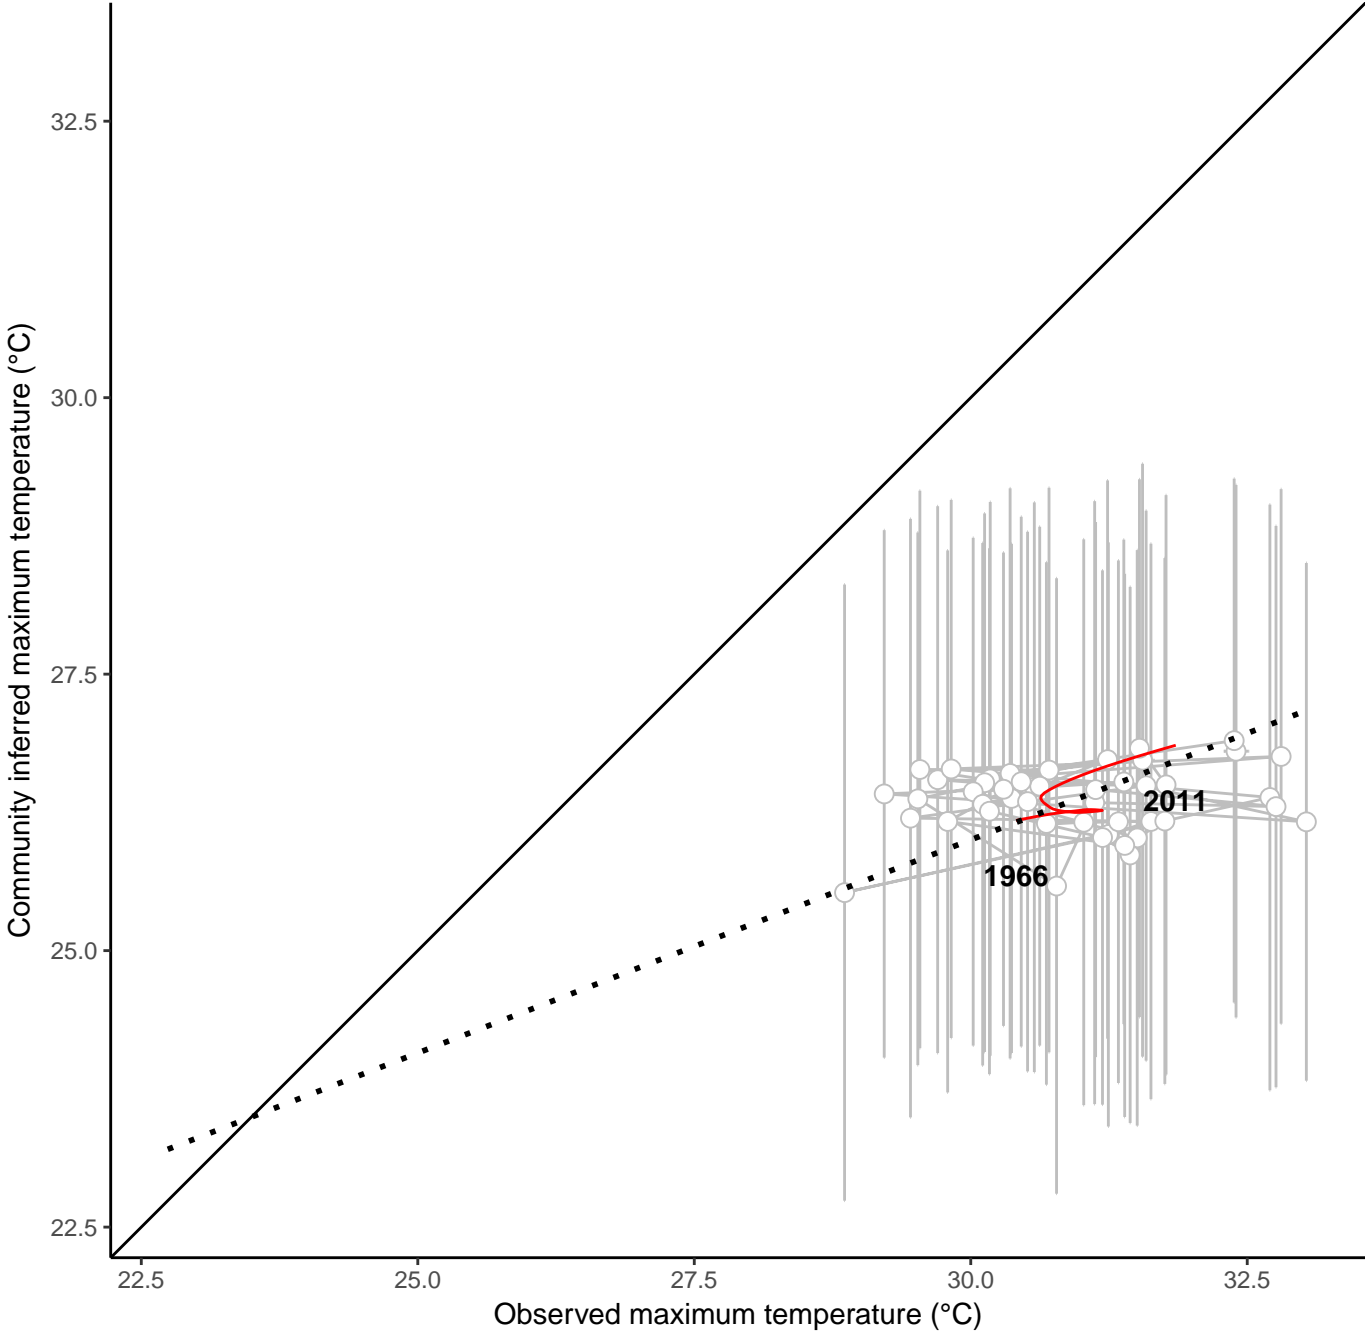

site : 840\_25\_18

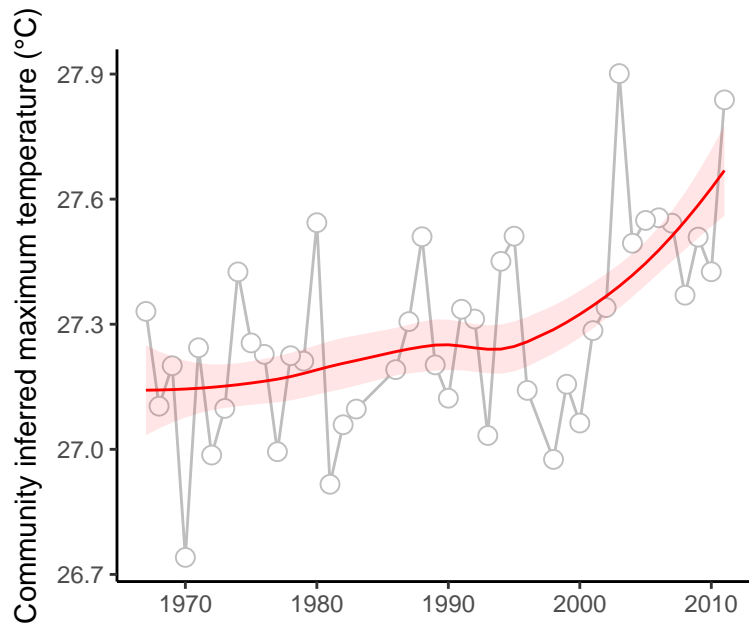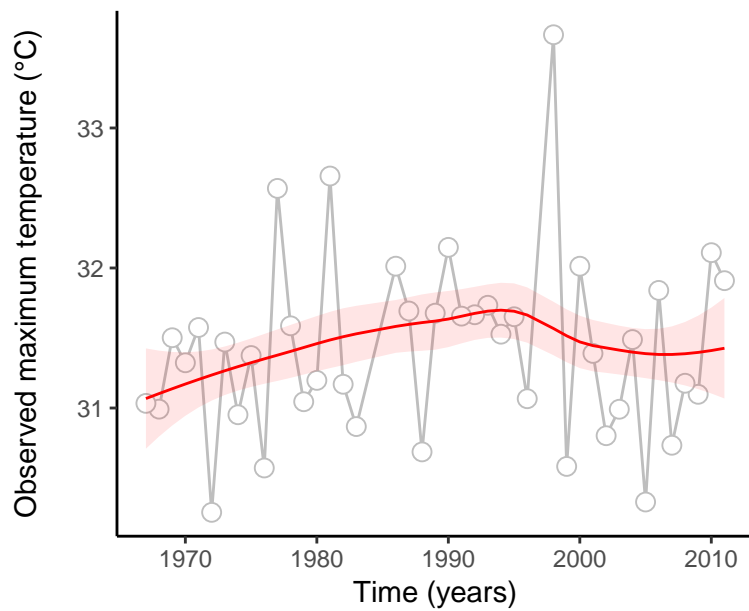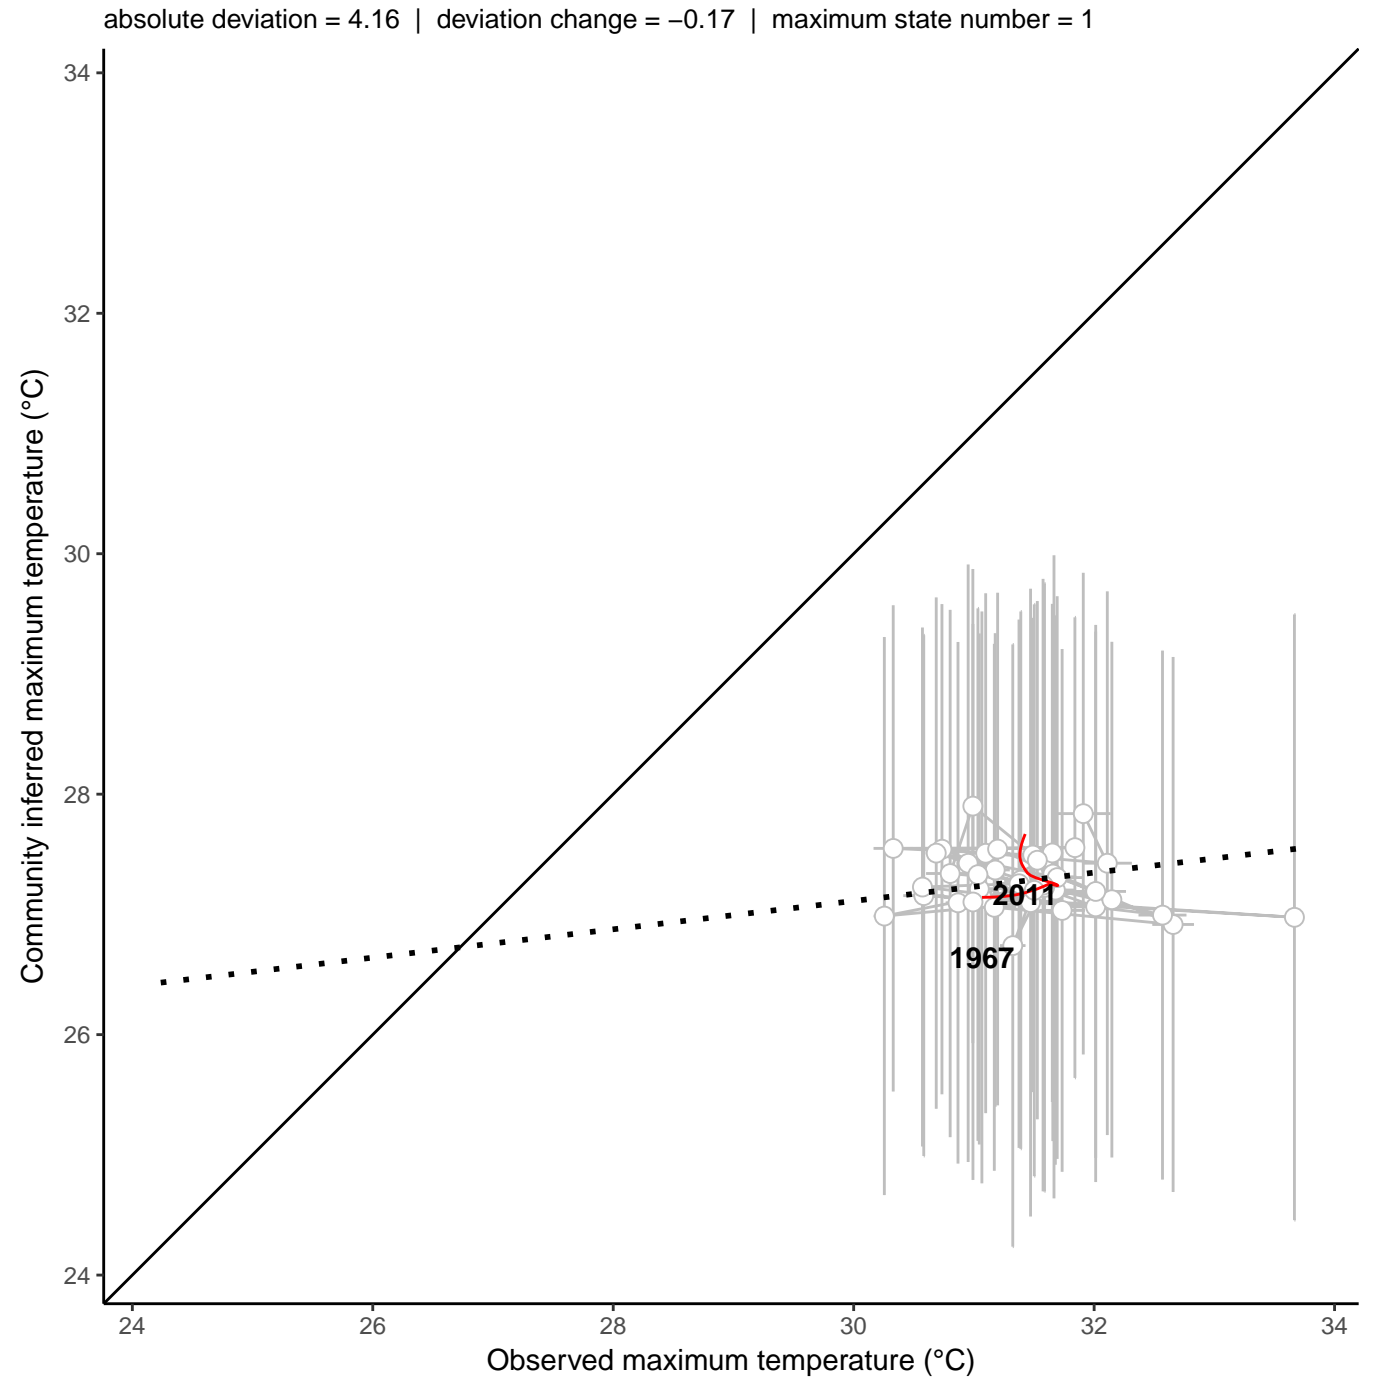

site : 840\_34\_29

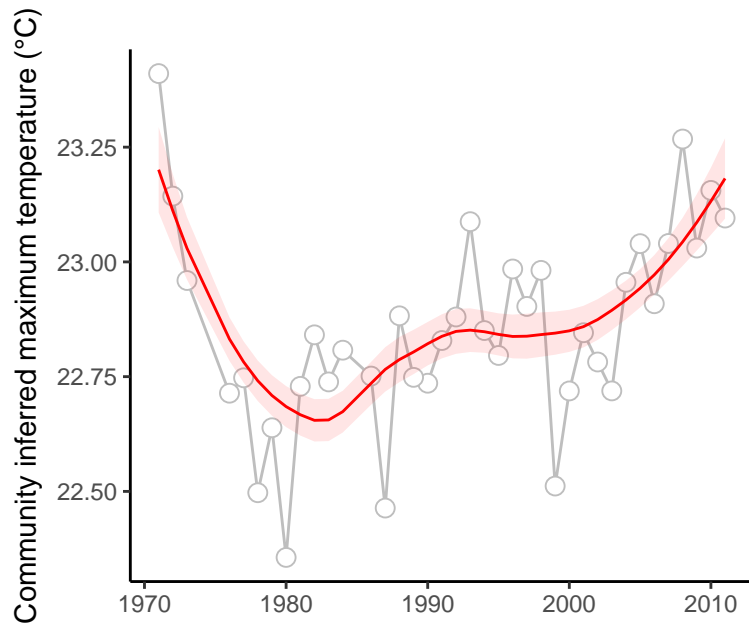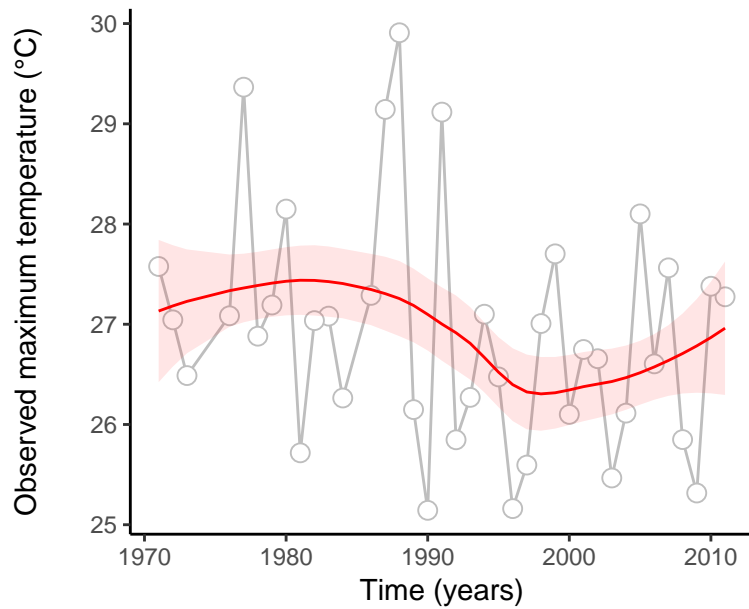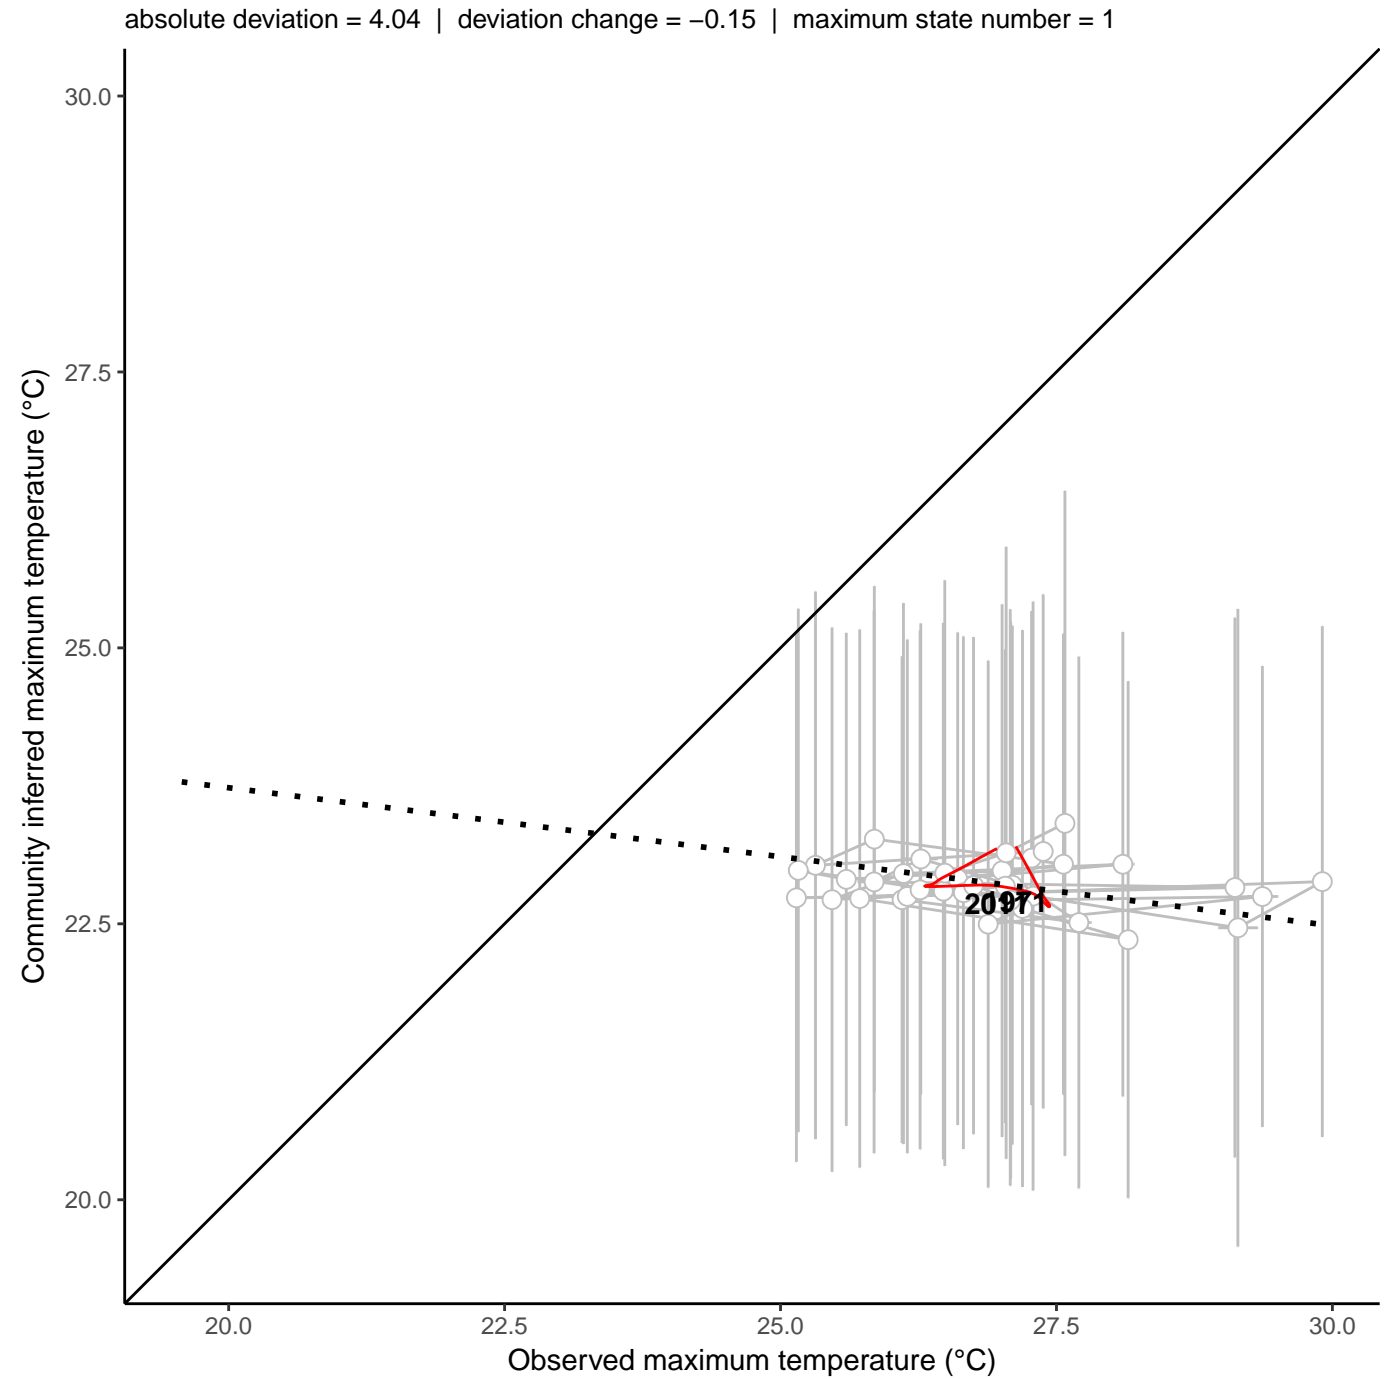

site : 840\_47\_6

absolute deviation = 0.55 | deviation change = -0.22 | maximum state number = 1

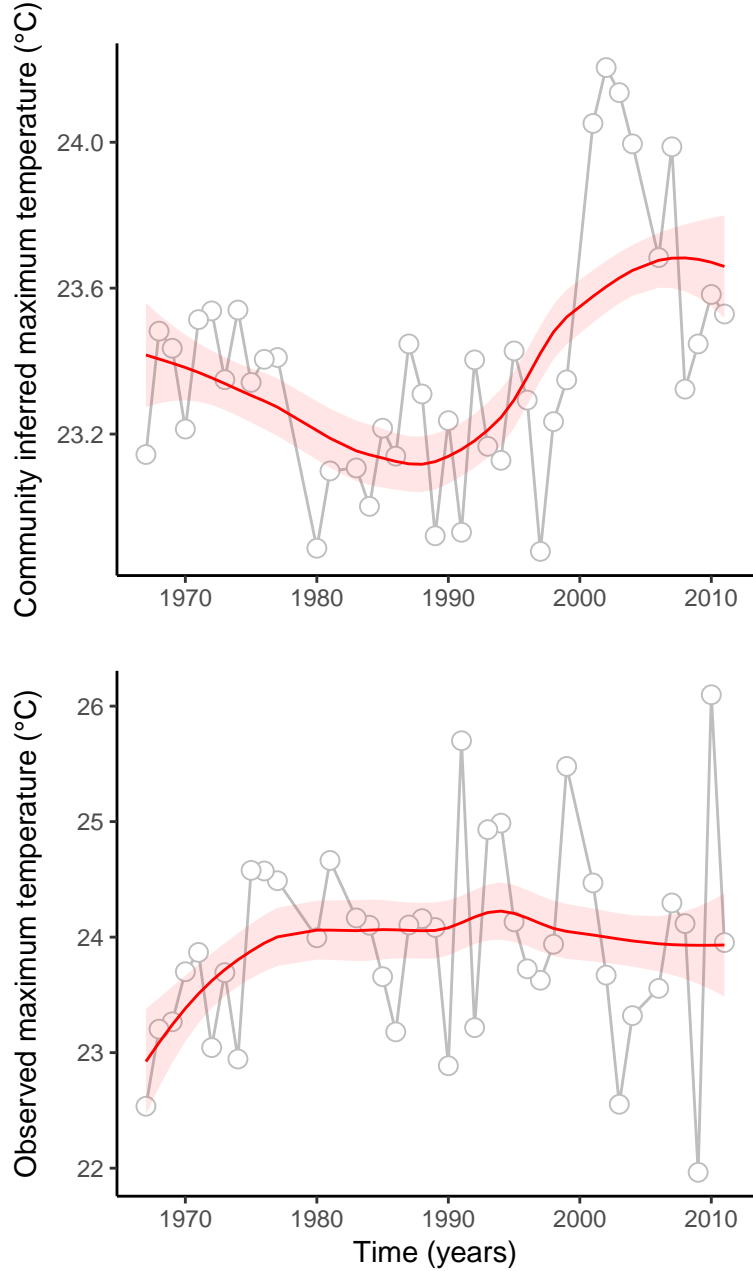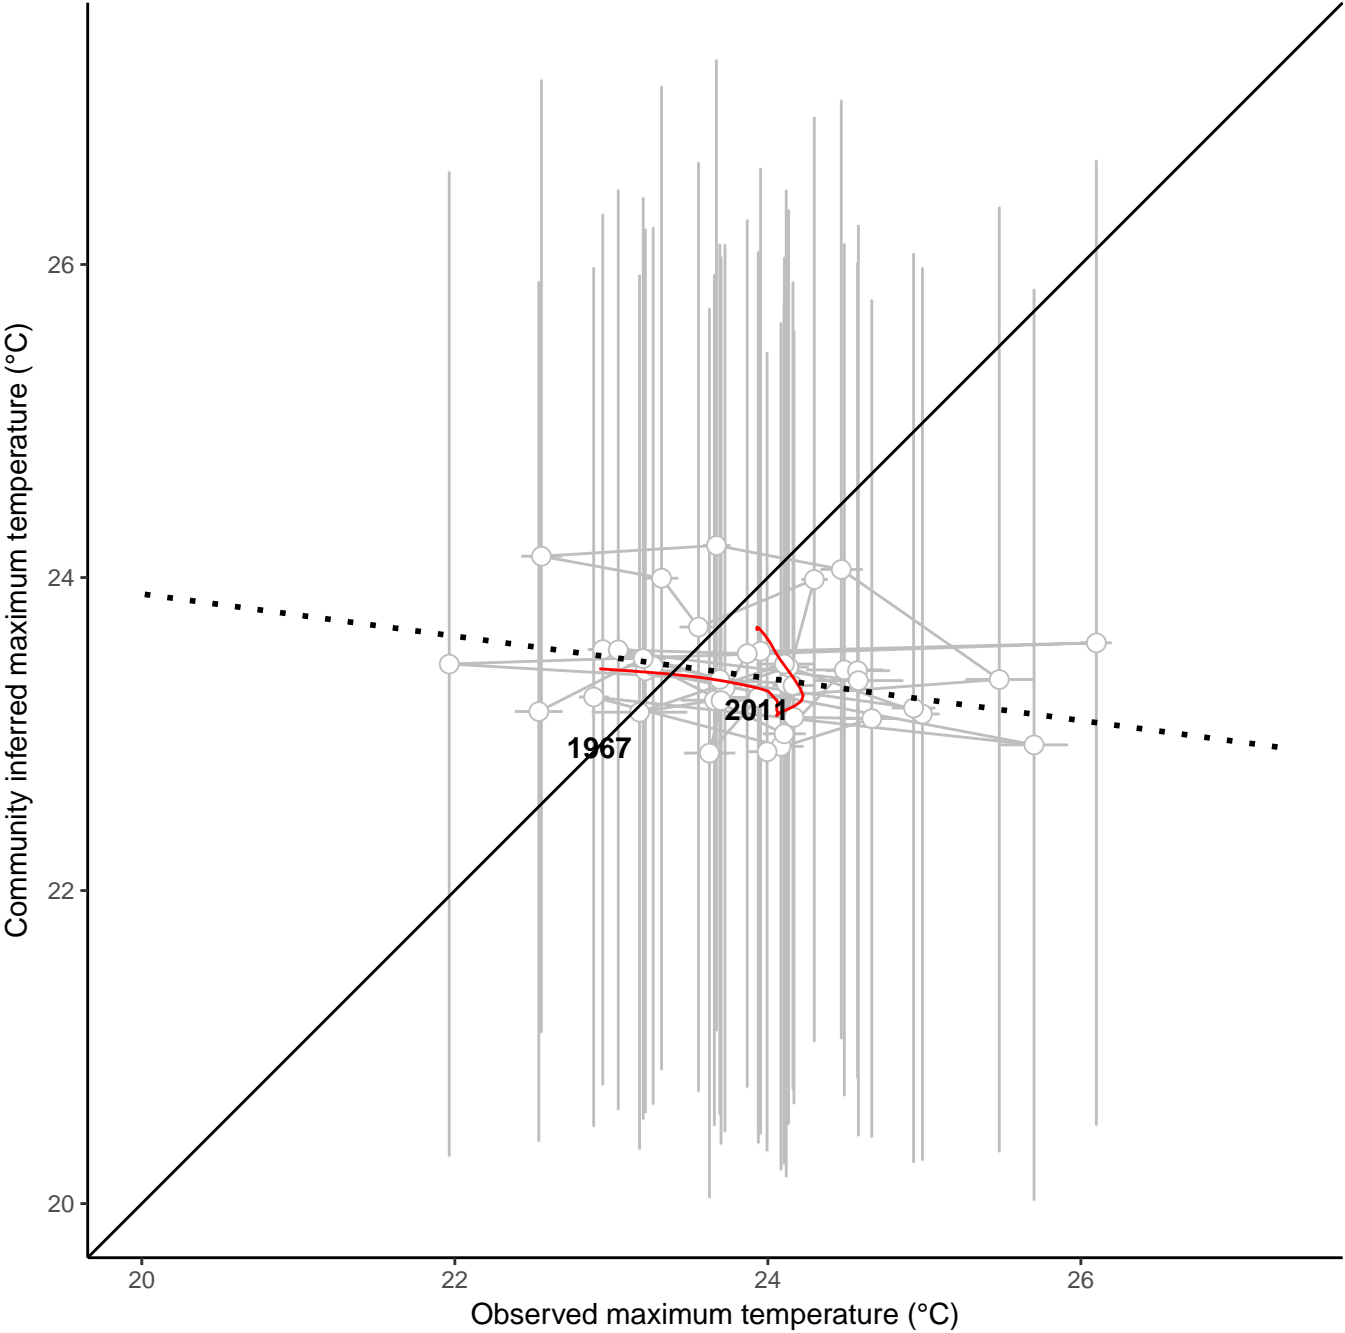

site : 840\_54\_13

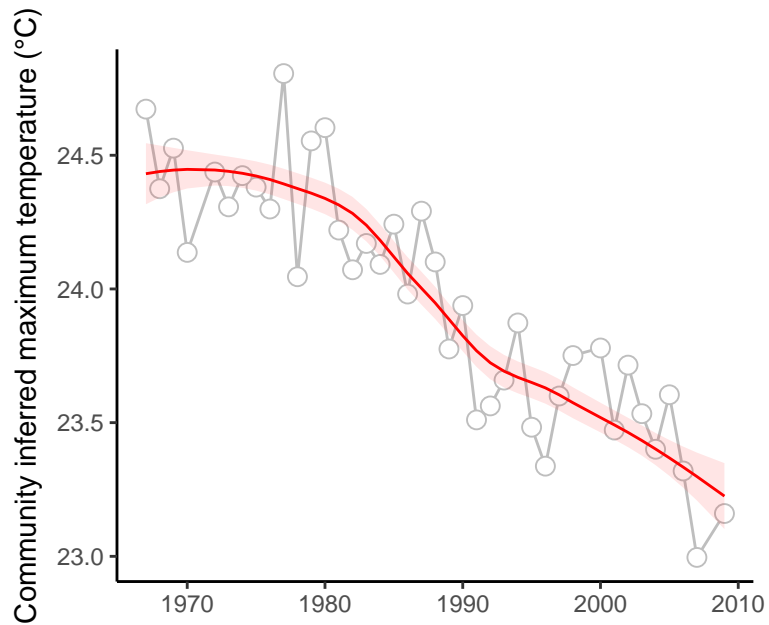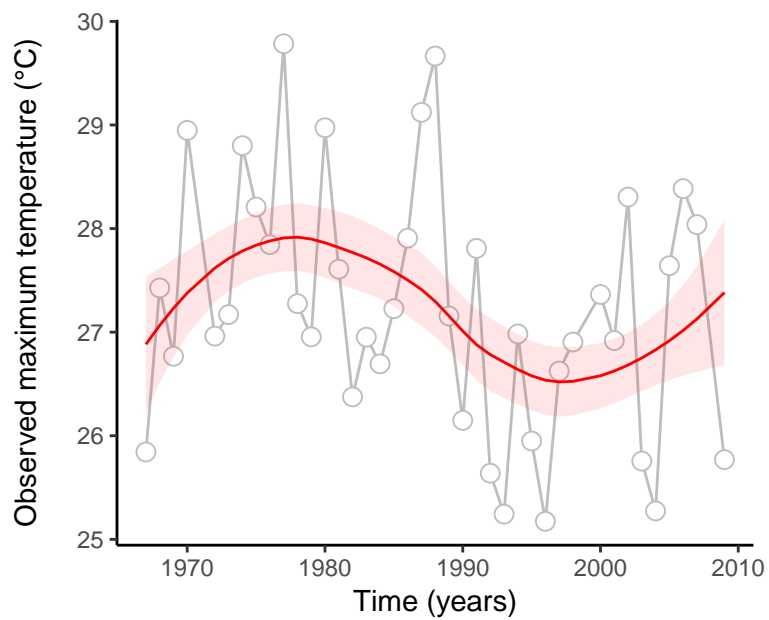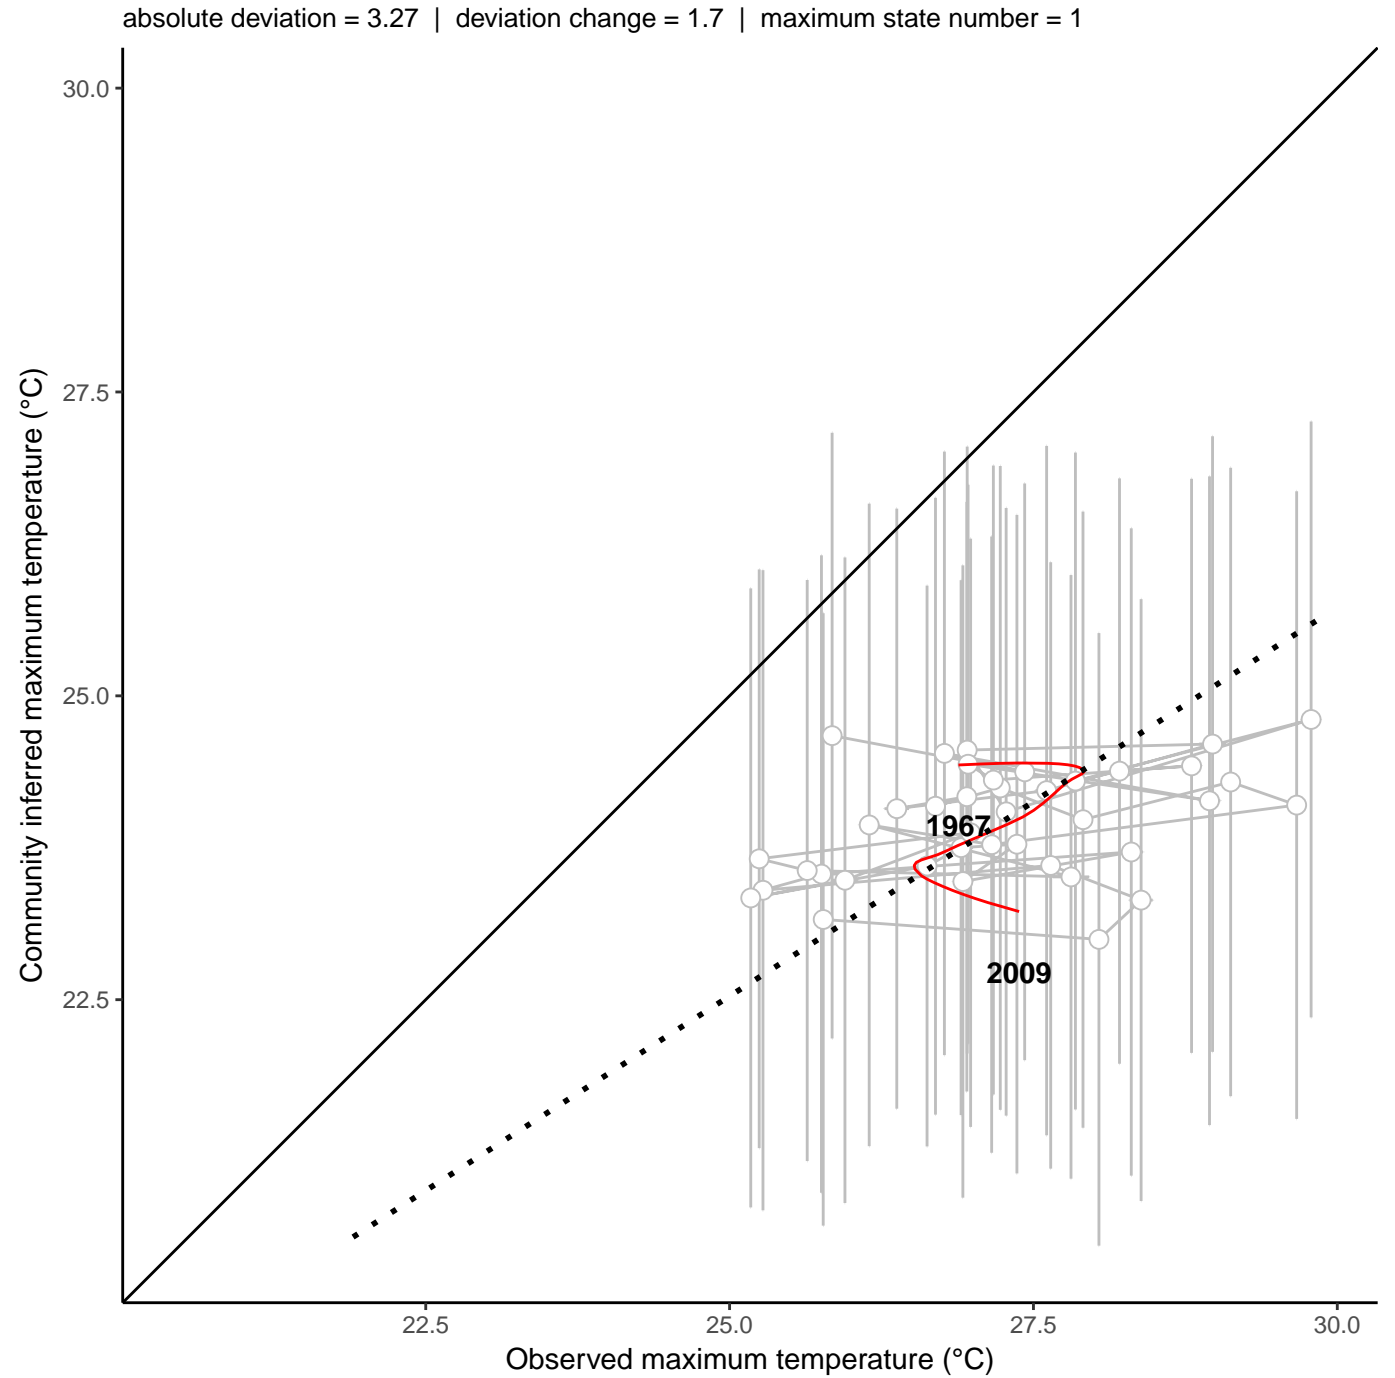

site : 840\_54\_7

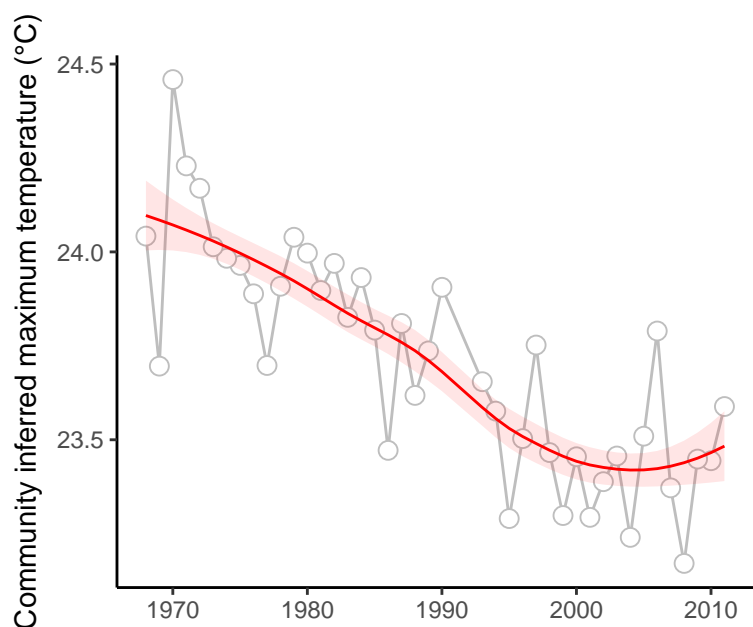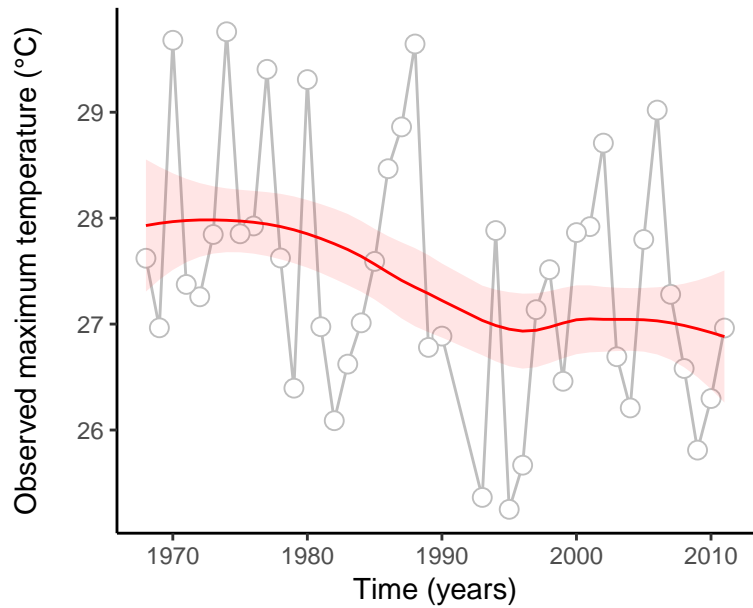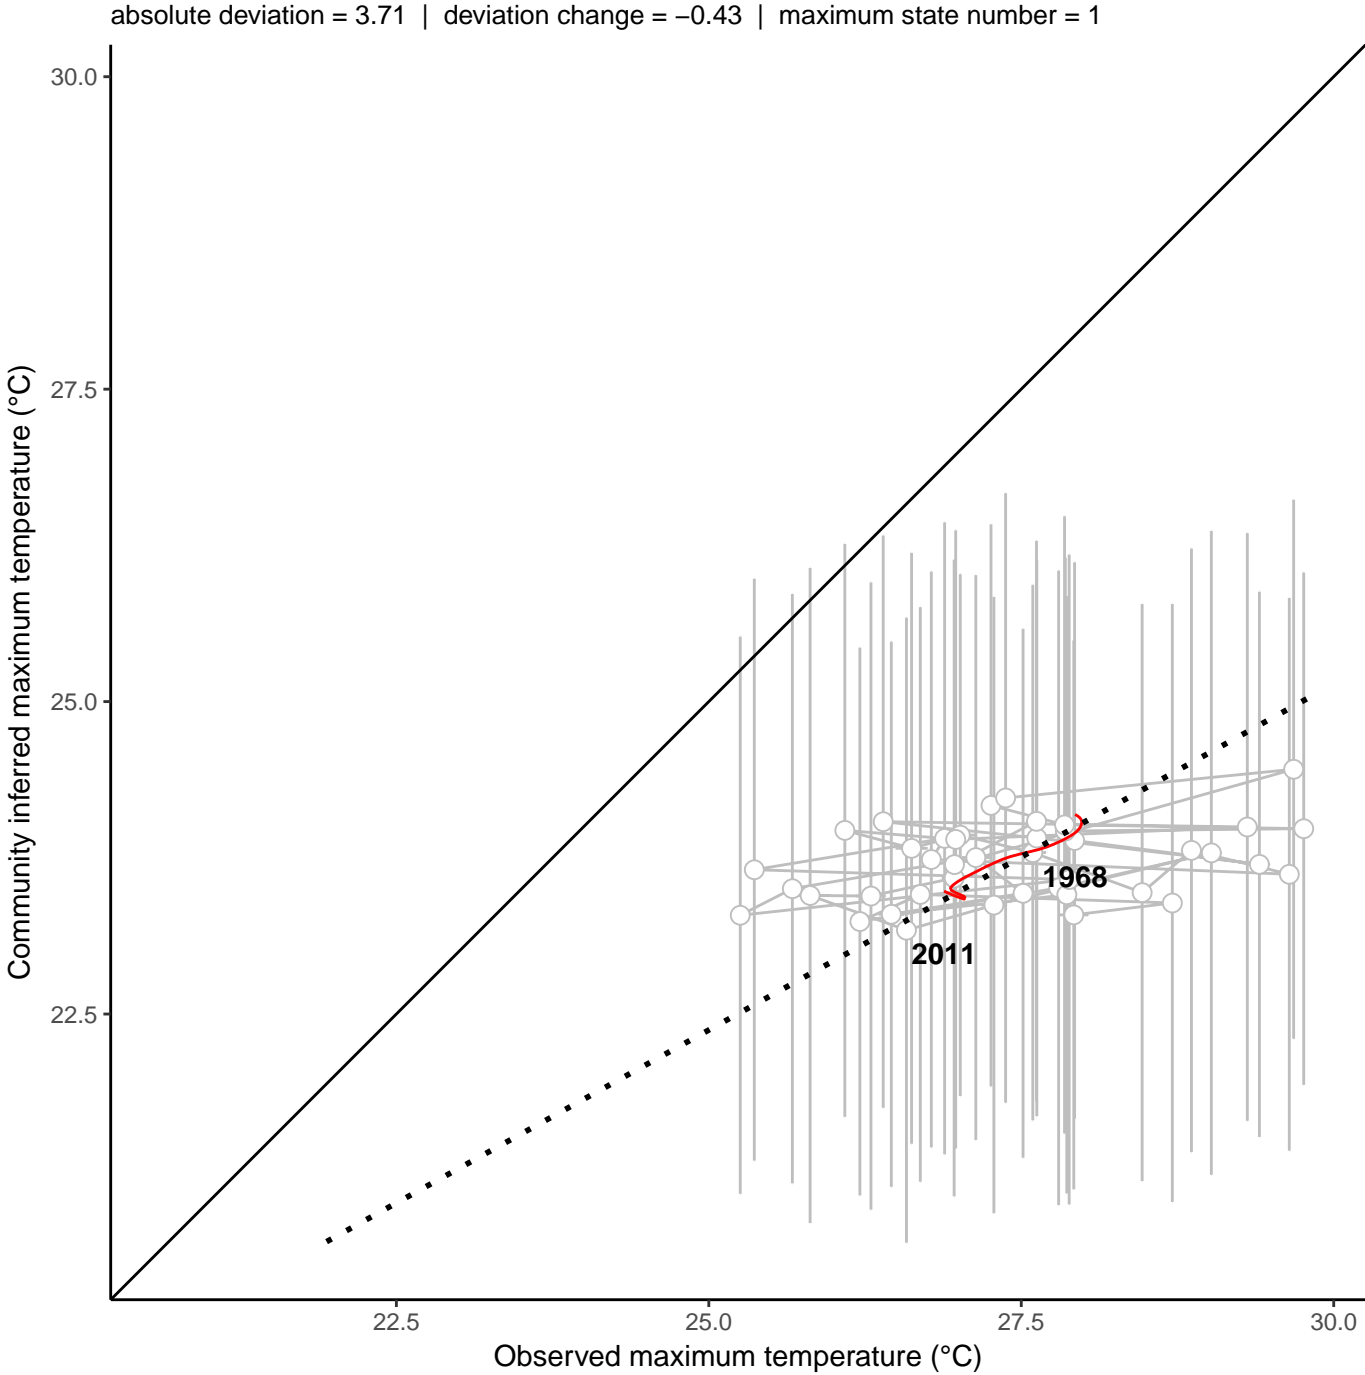

site : 840\_58\_7

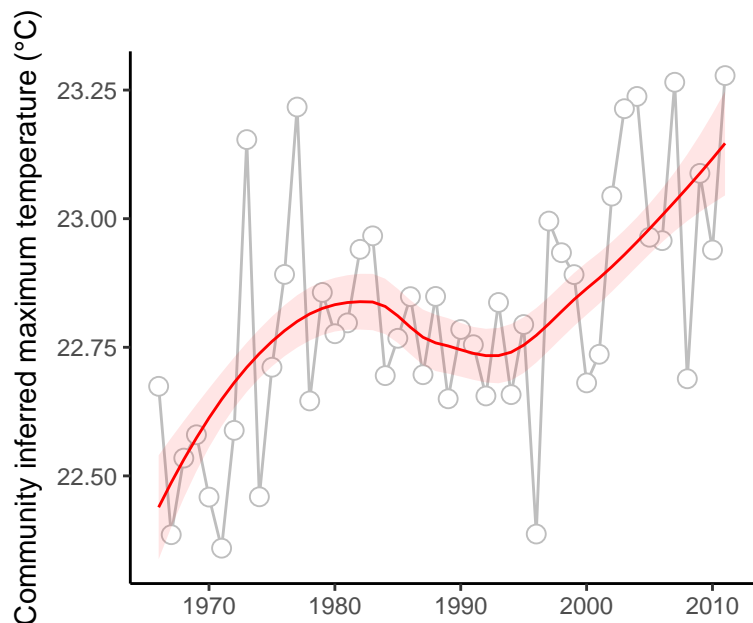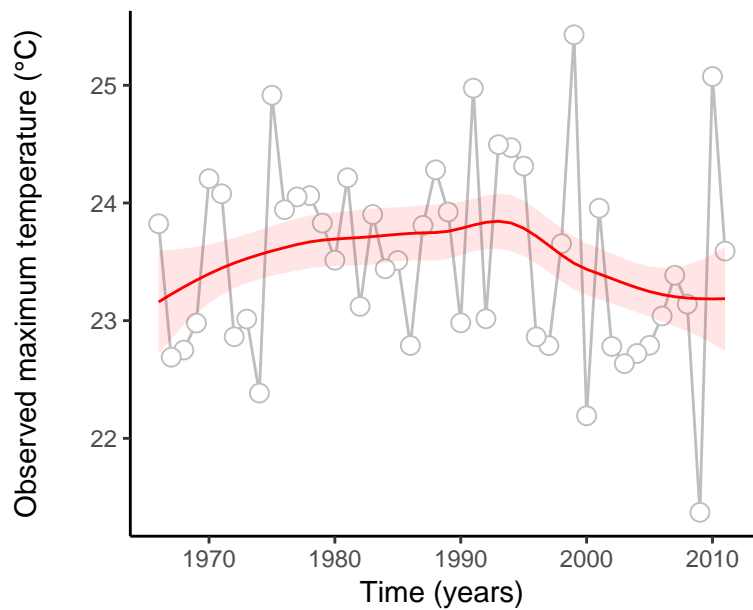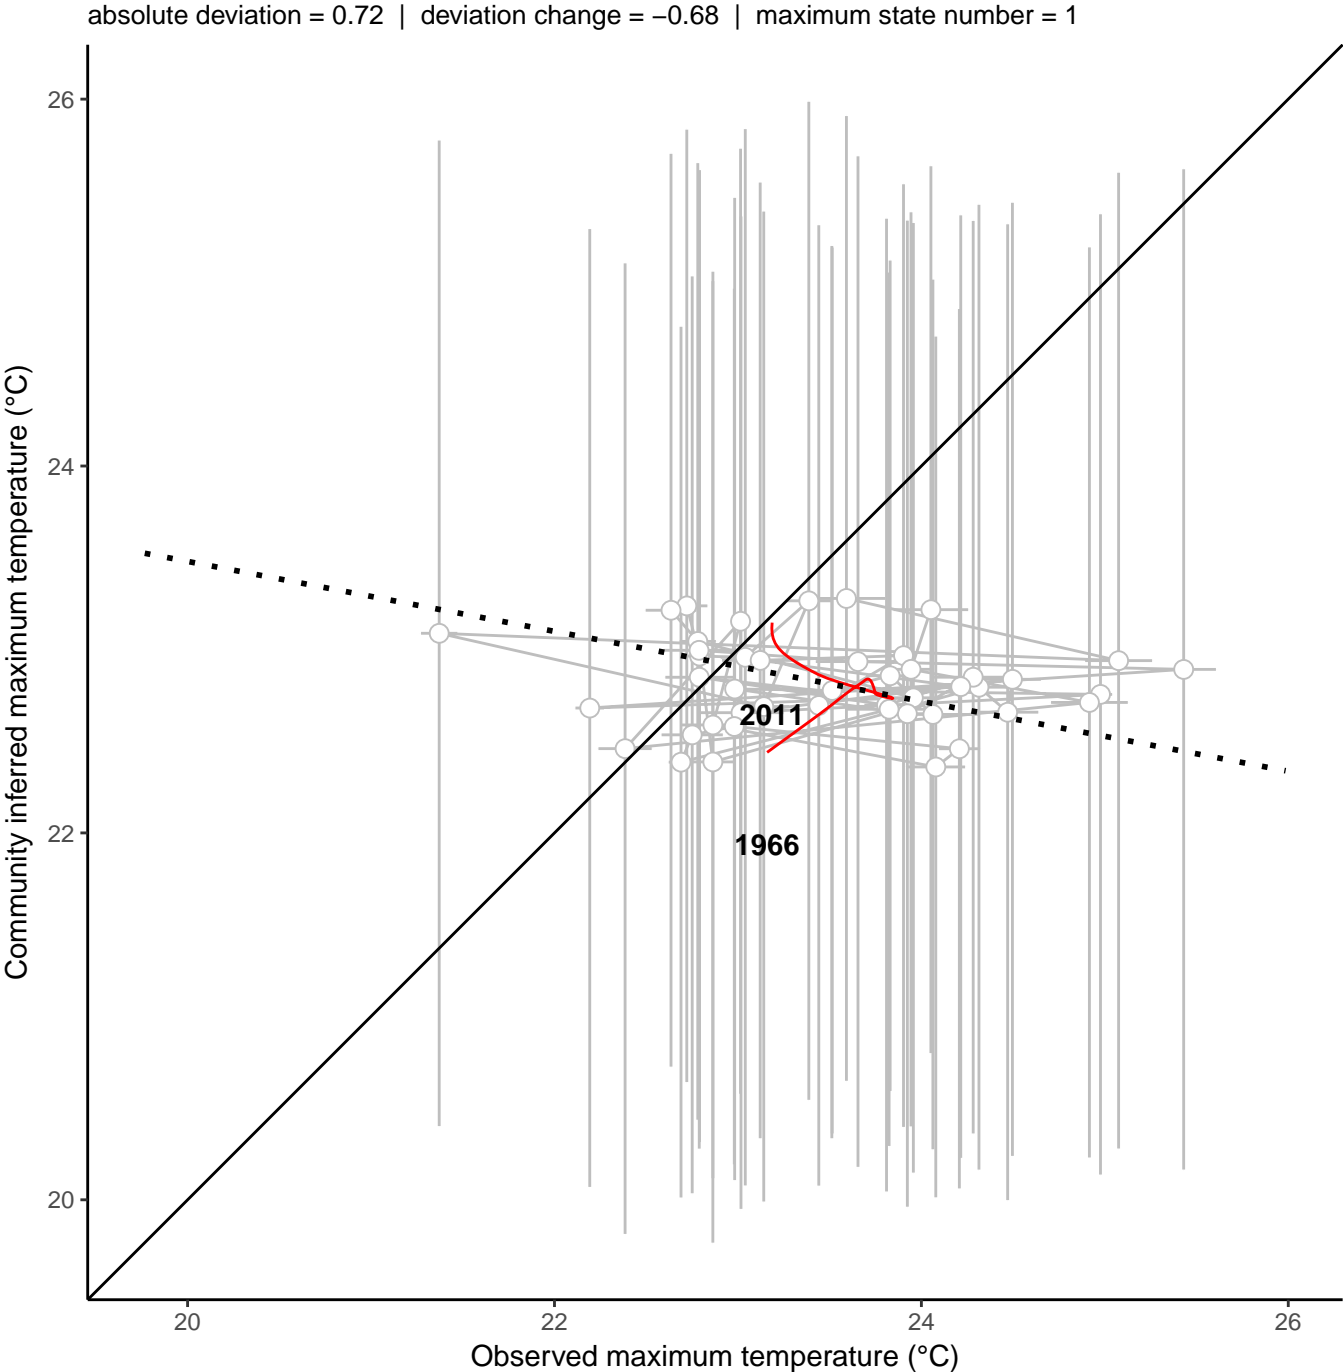

site : 840\_61\_14

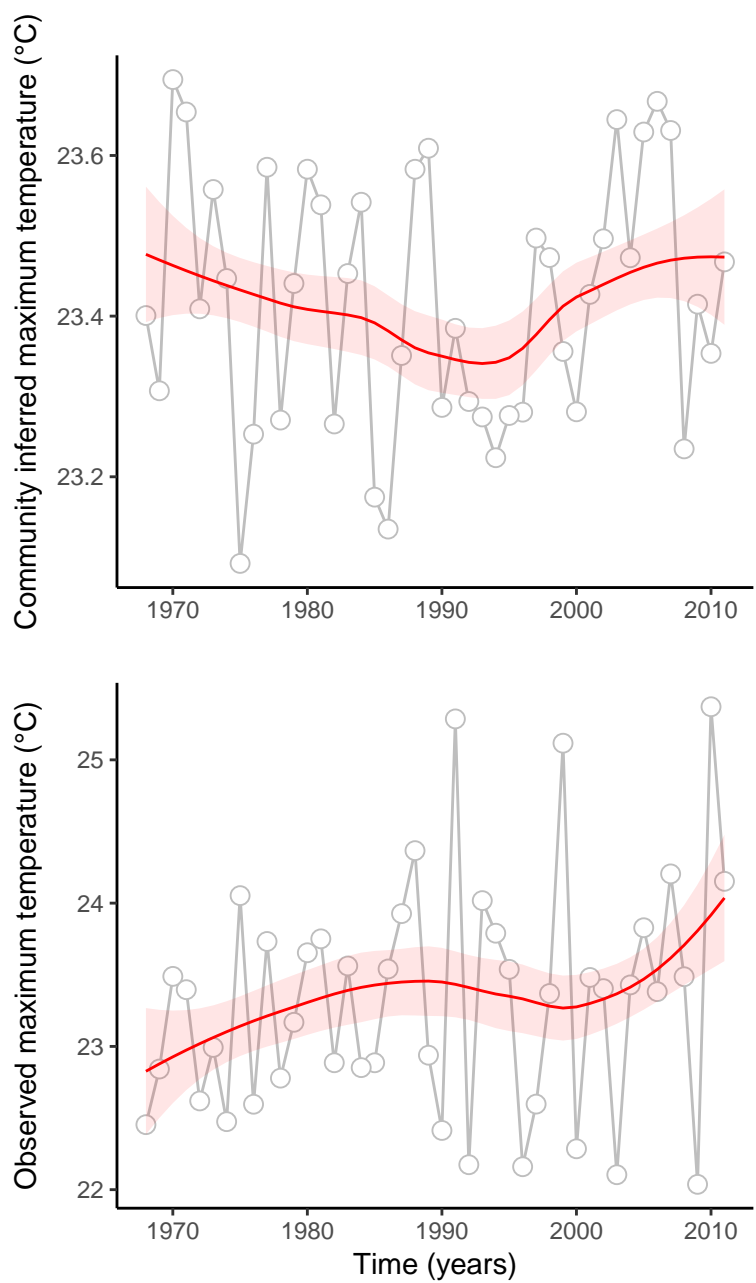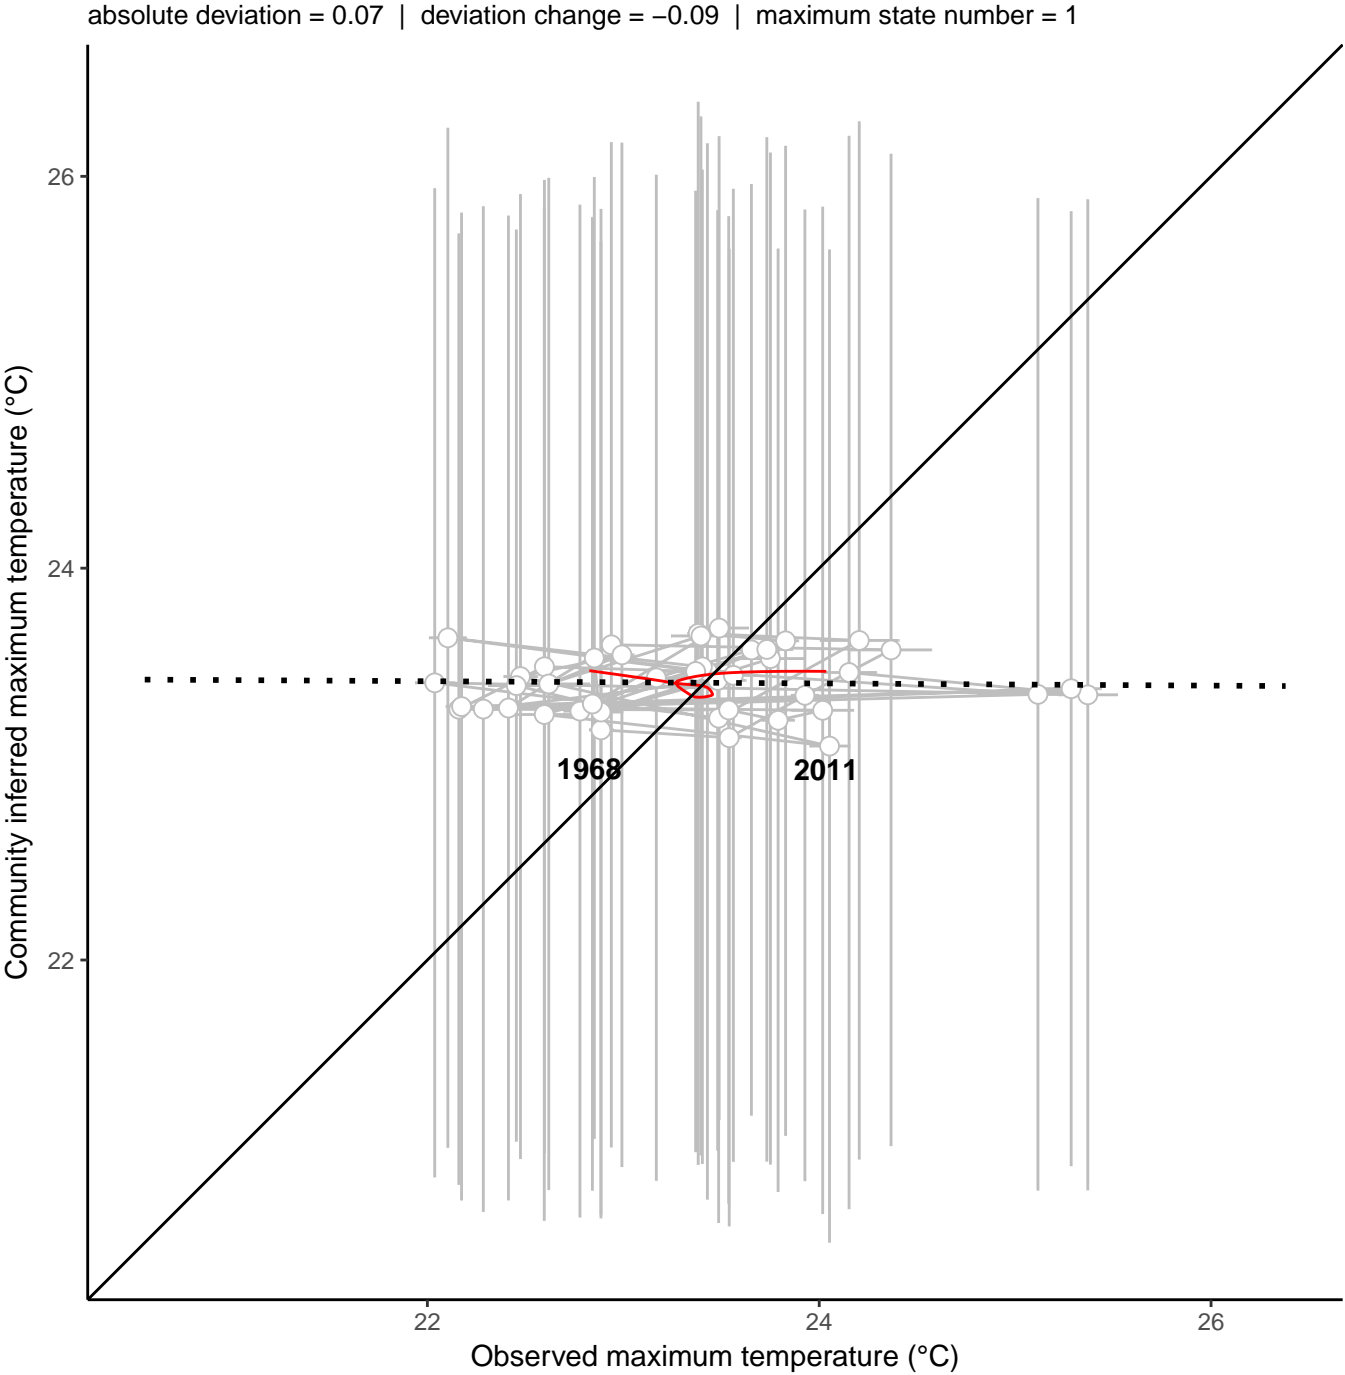



site : 840\_61\_67

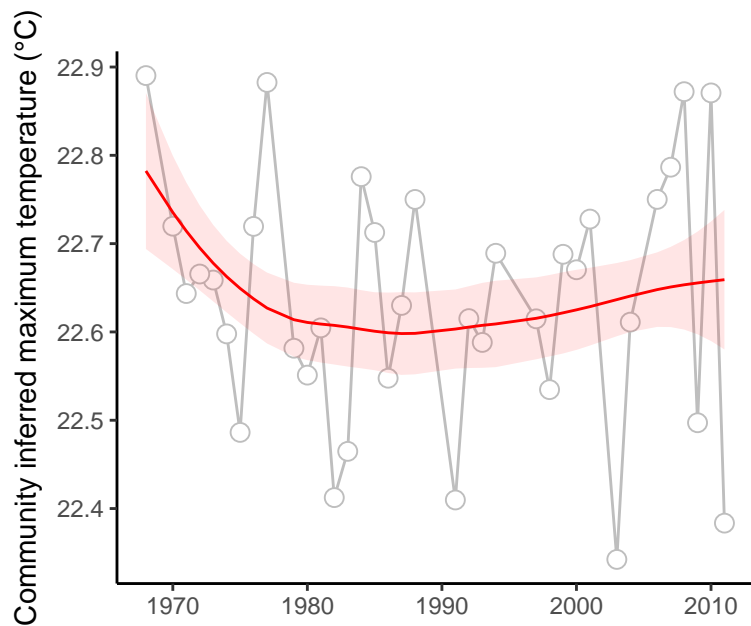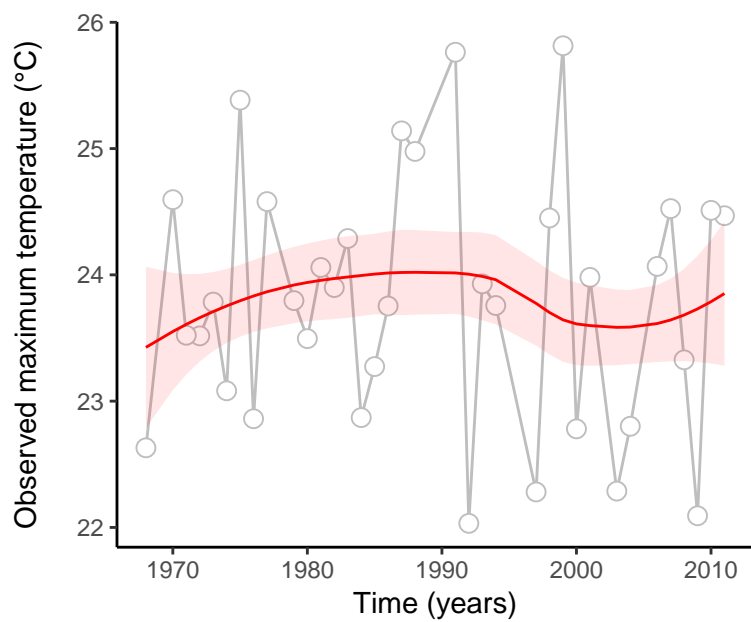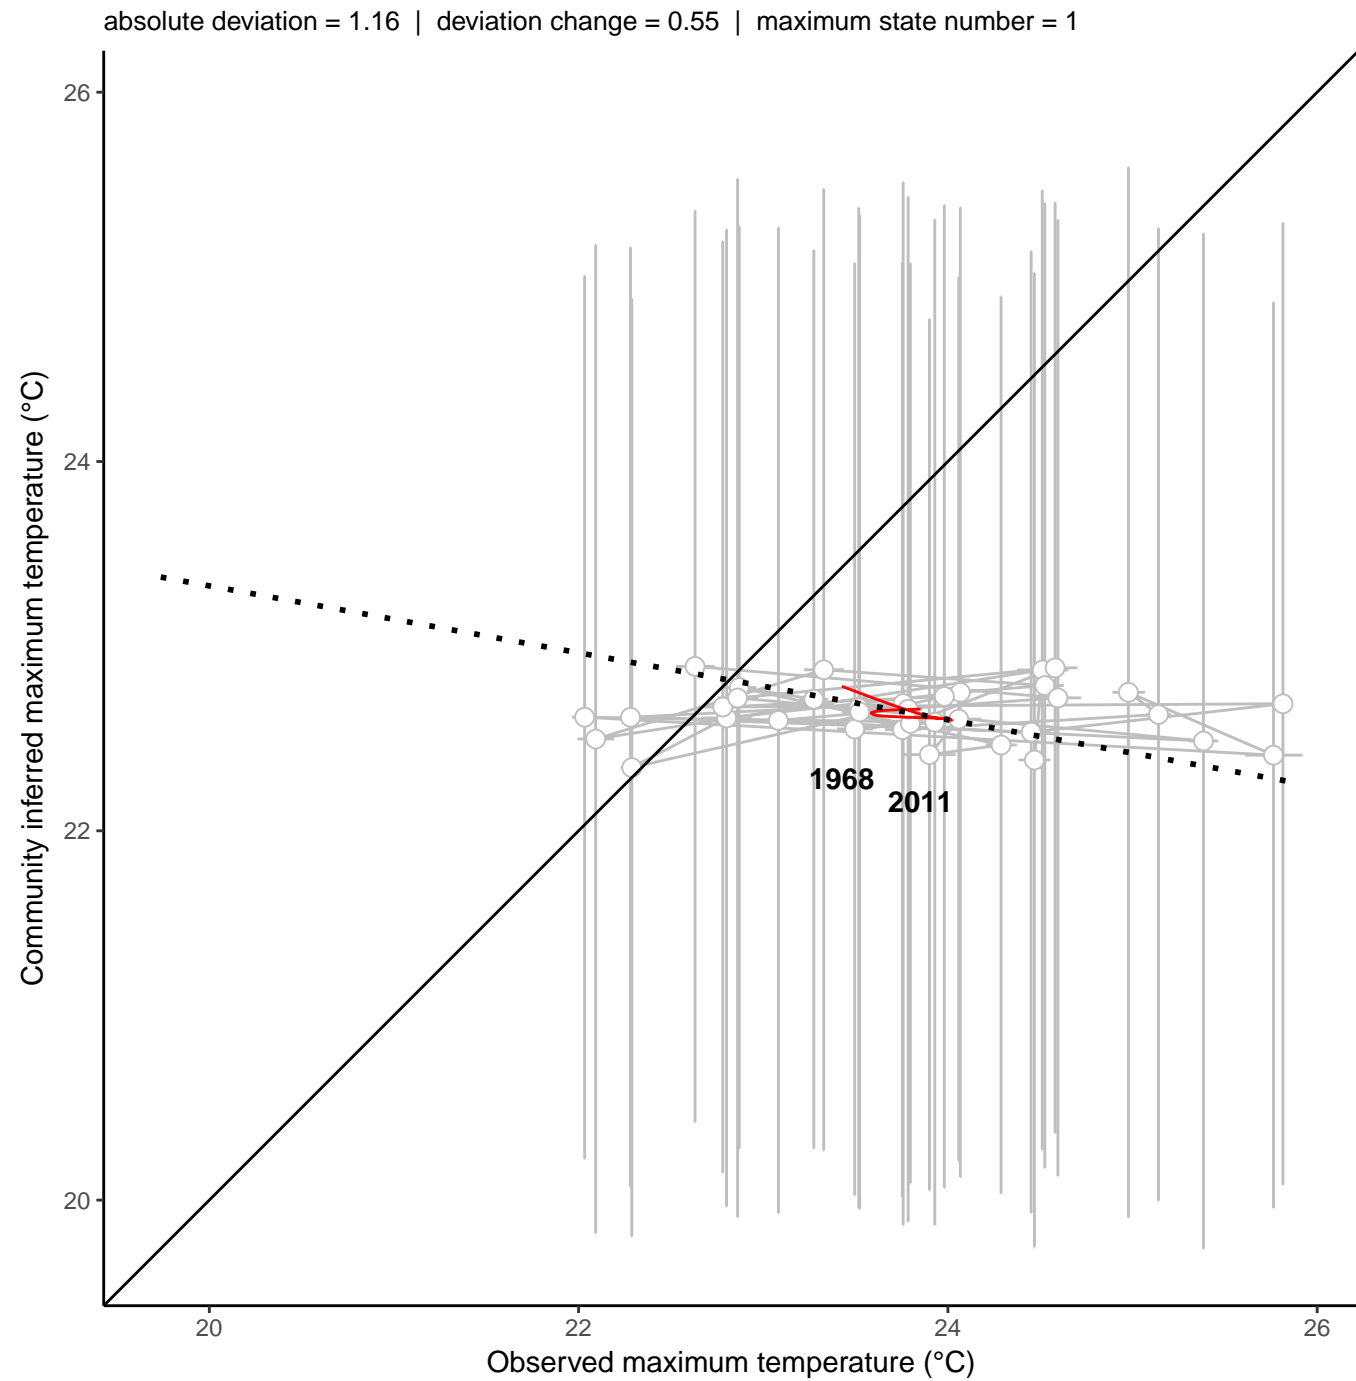

site : 840\_67\_21

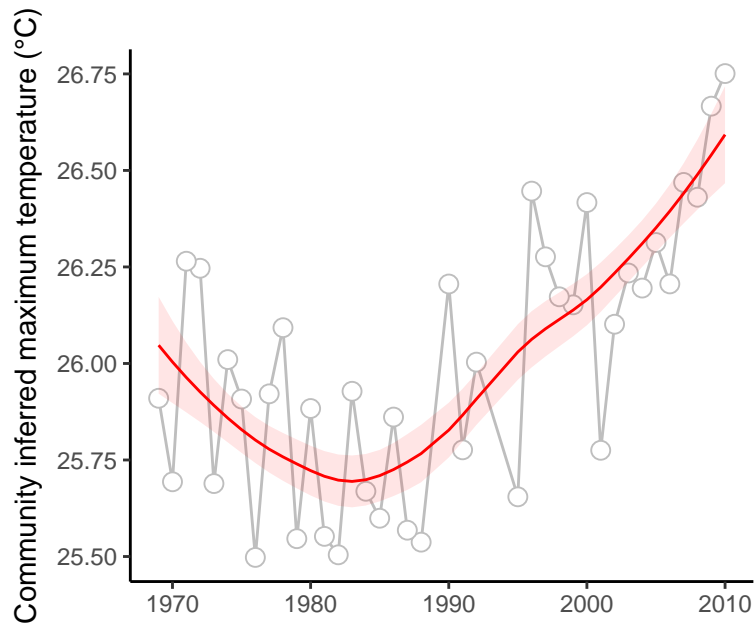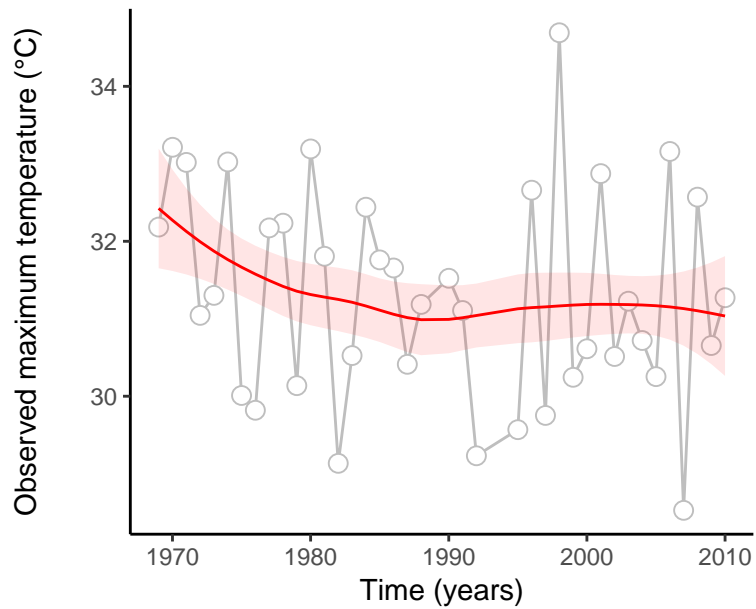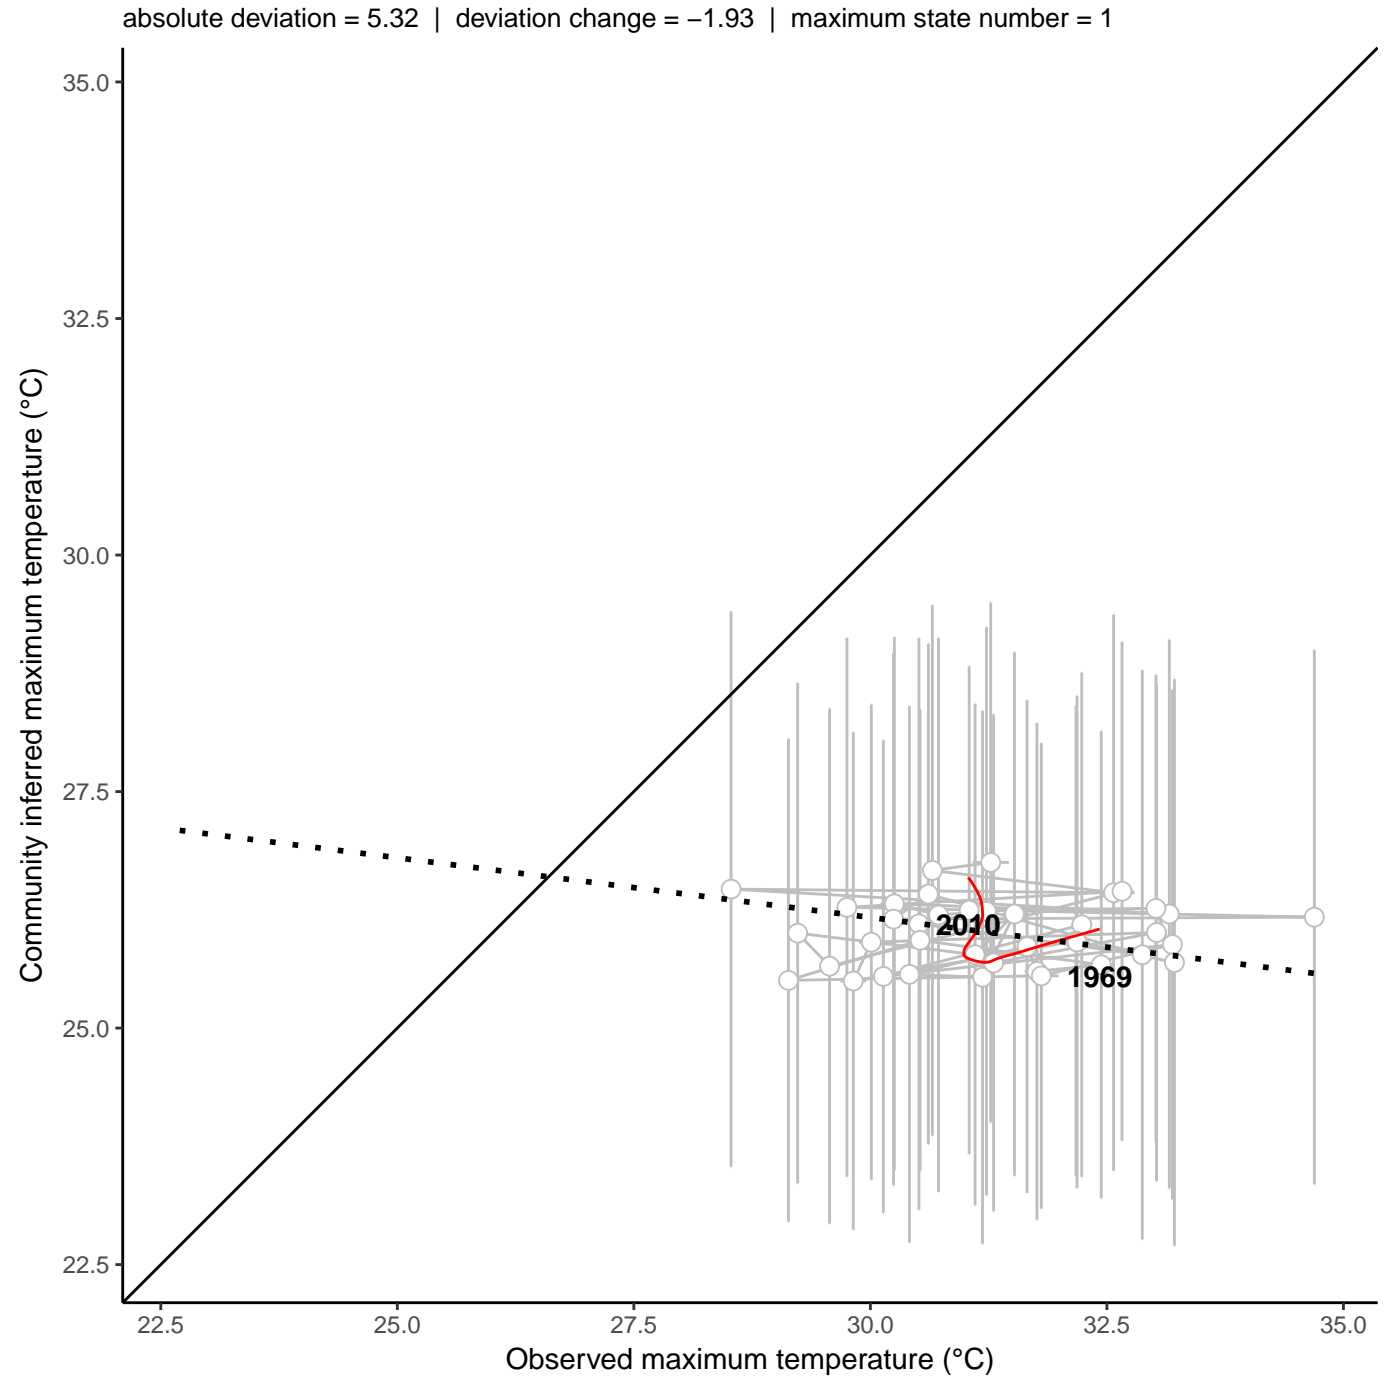

site : 840\_91\_61

absolute deviation = 1.92 | deviation change = -0.49 | maximum state number = 1

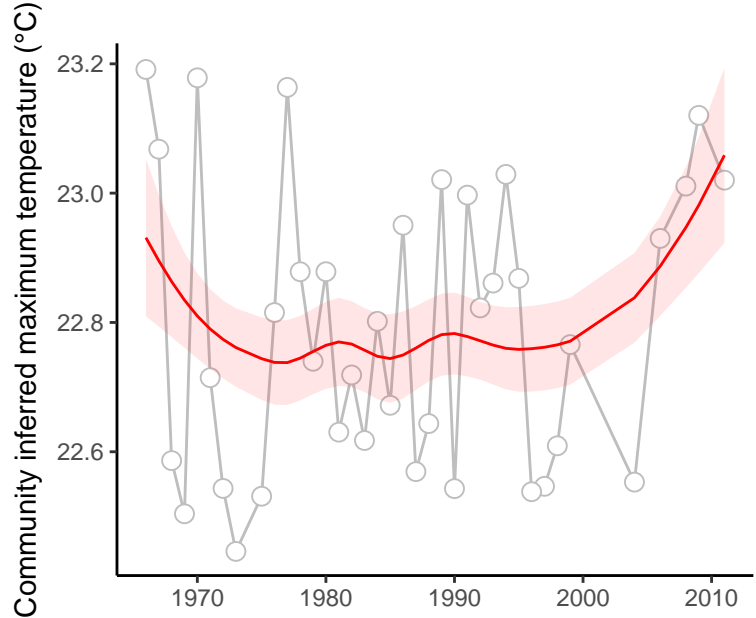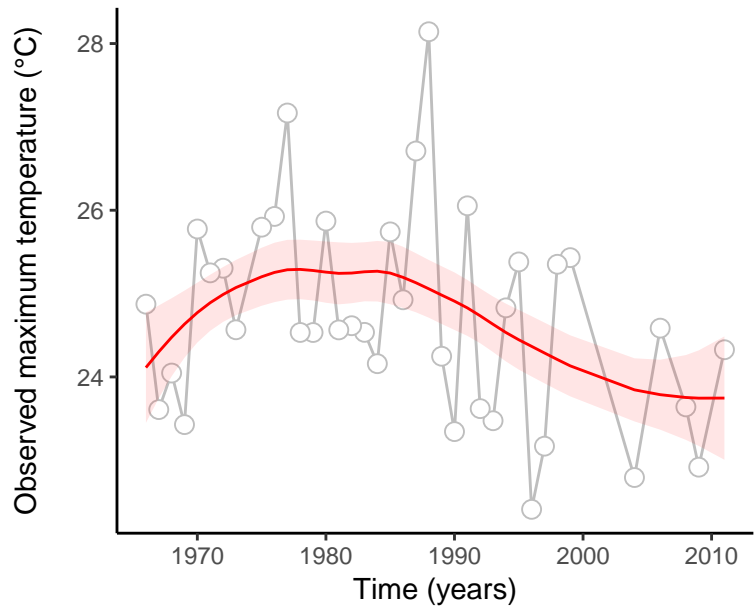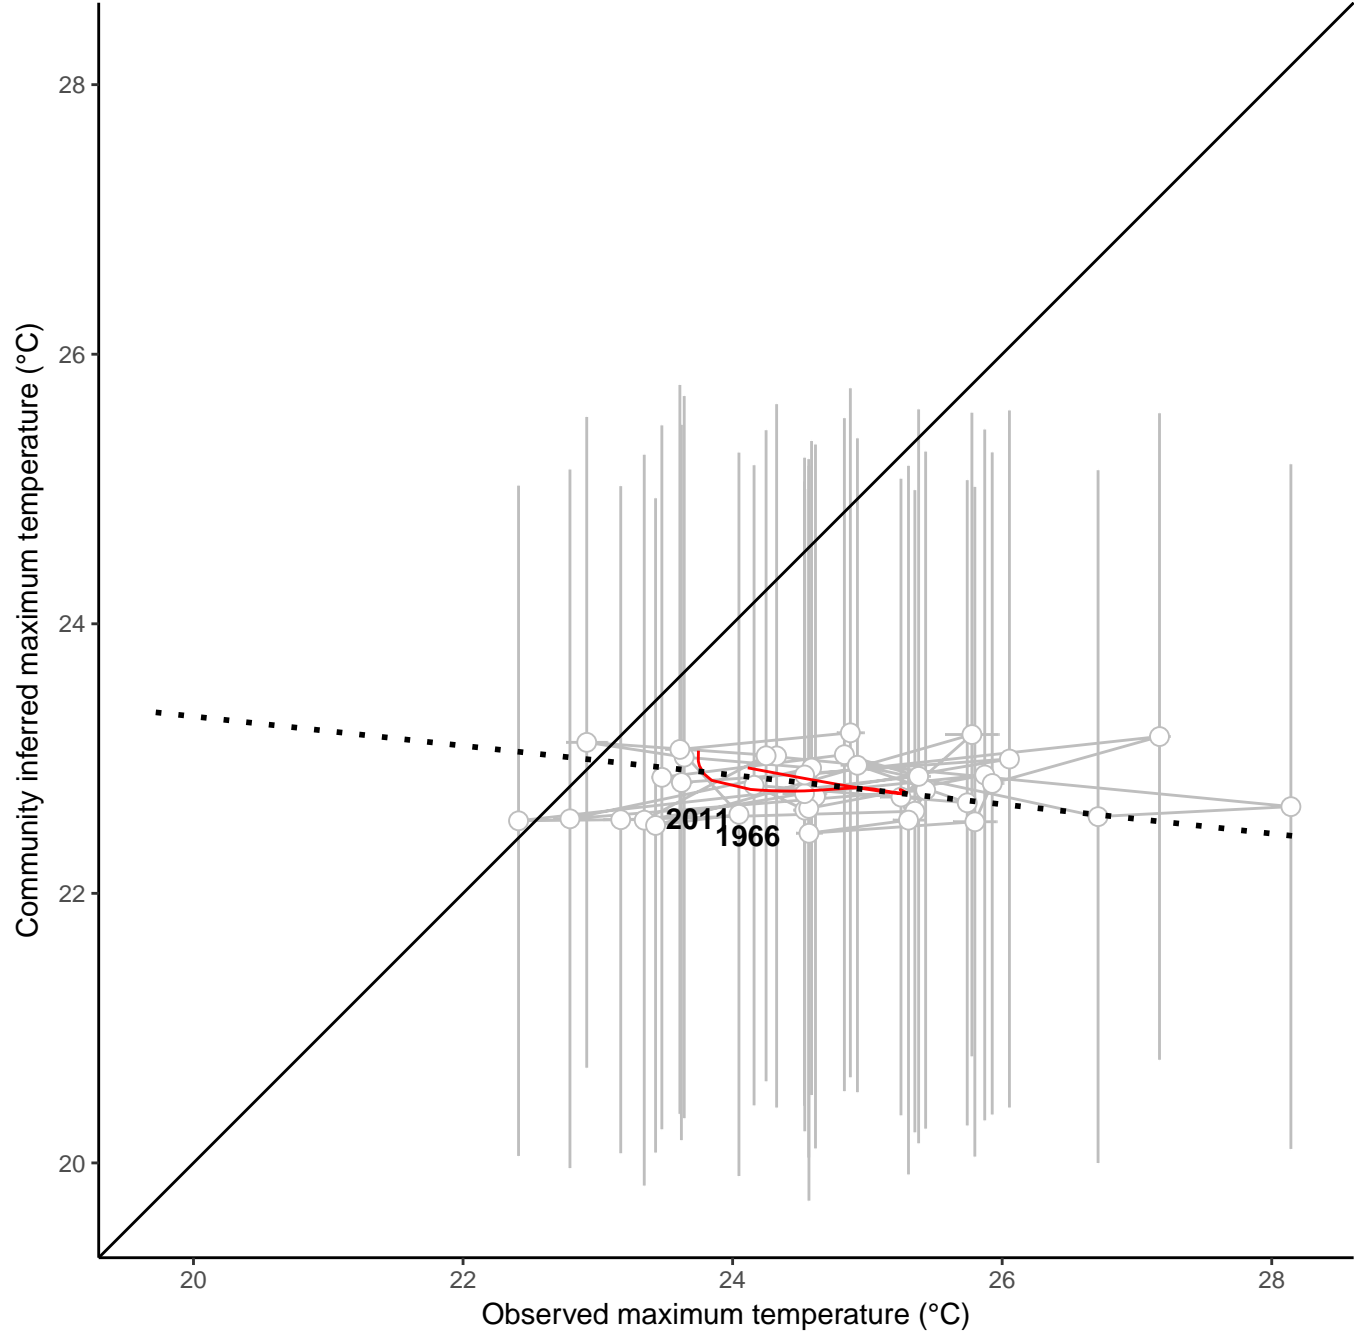

site : 840\_14\_198

absolute deviation = 0.39 | deviation change = -1.32 | maximum state number = 1

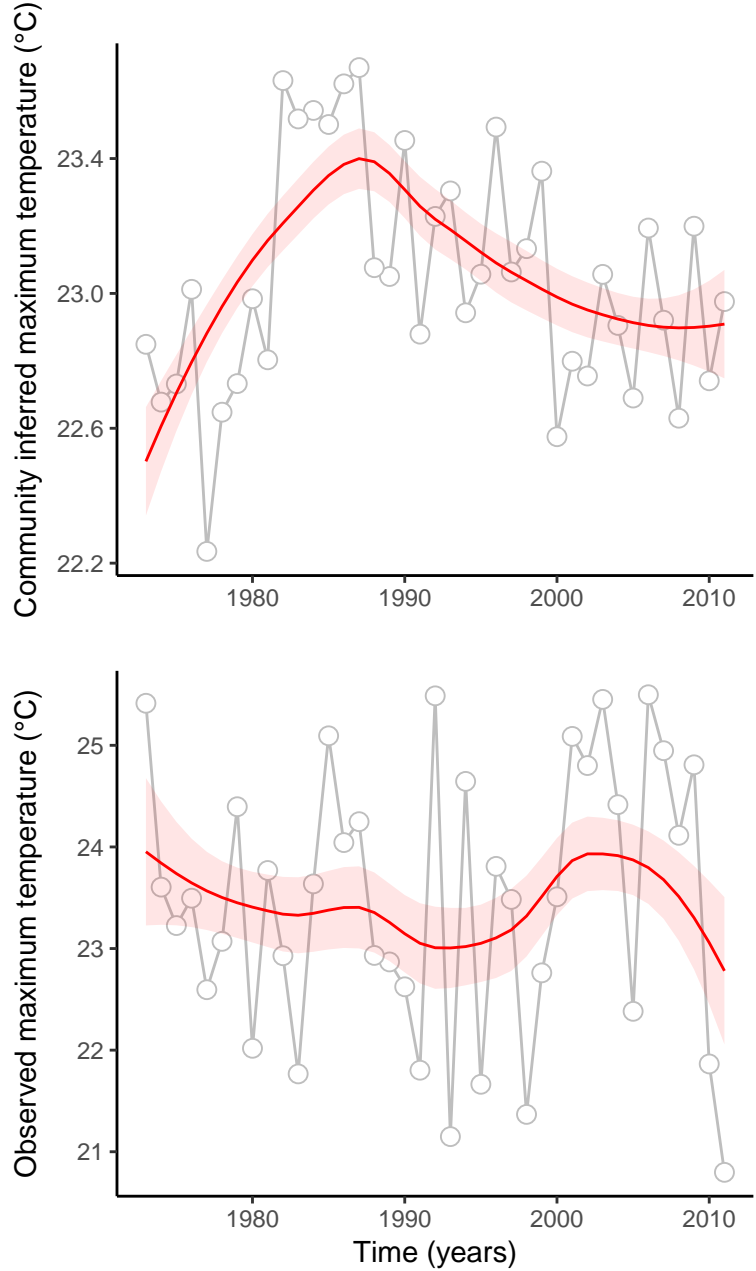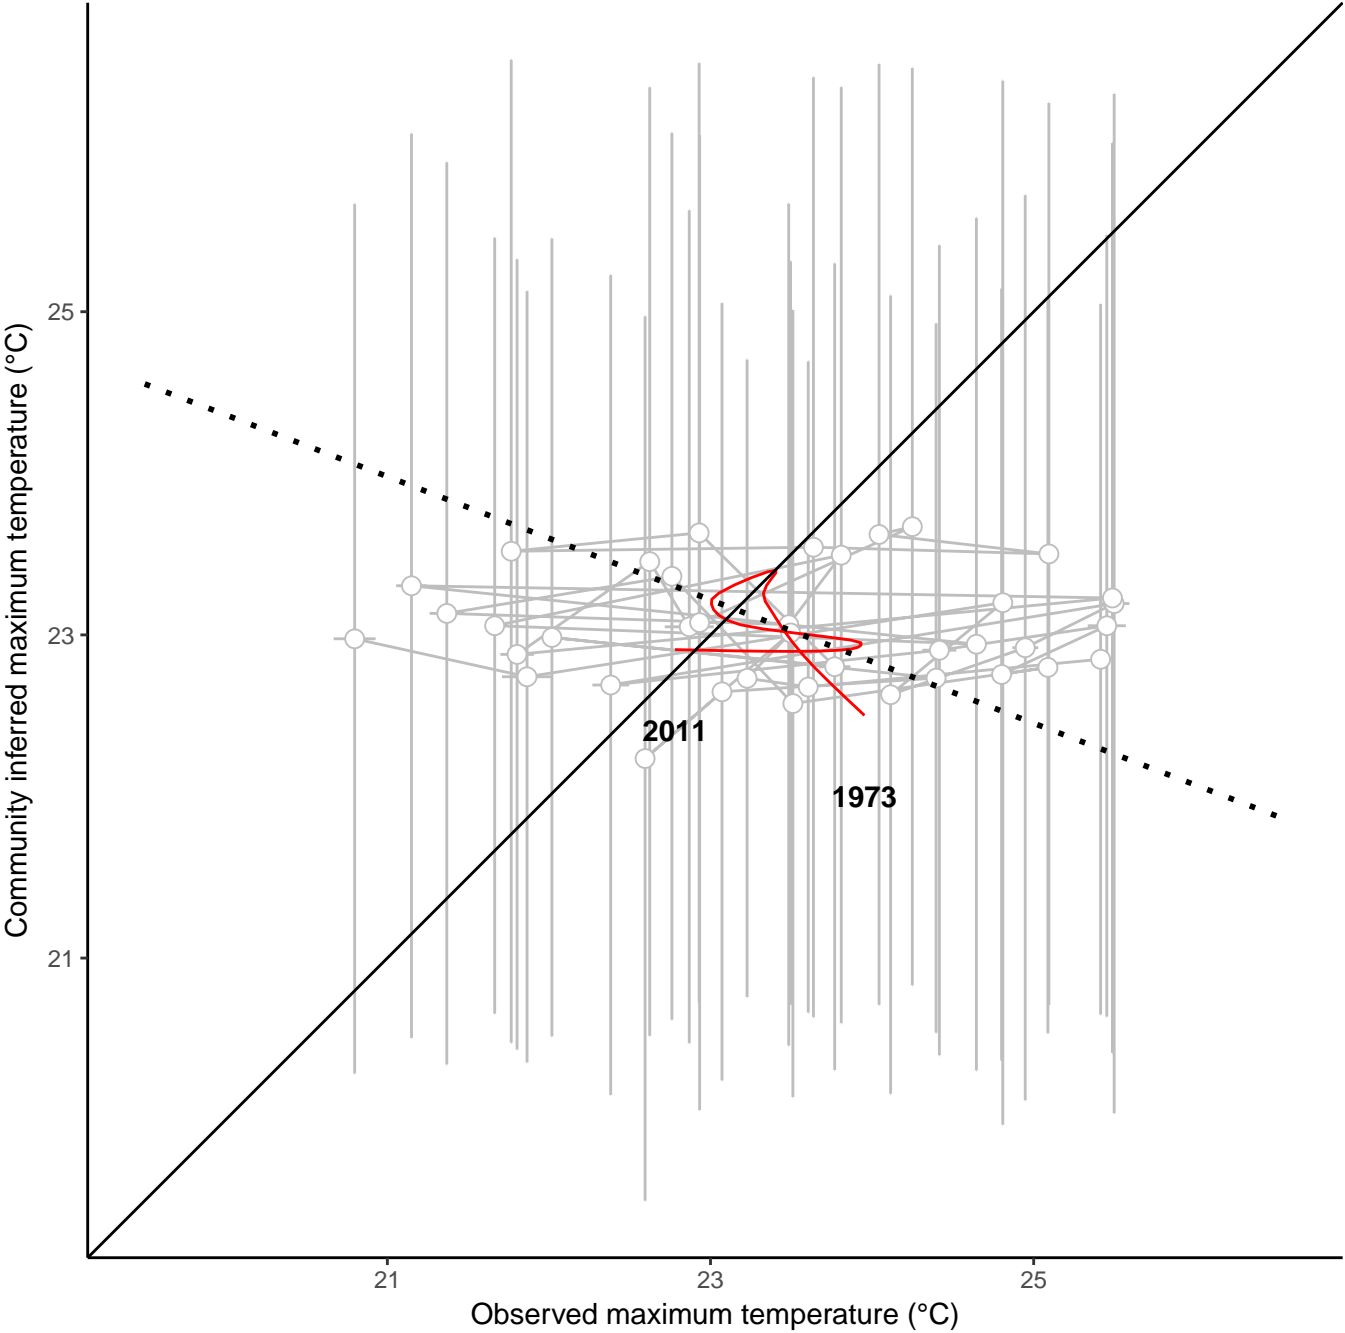

site : 840\_34\_50

absolute deviation = 4.1 | deviation change = 1.57 | maximum state number = 1

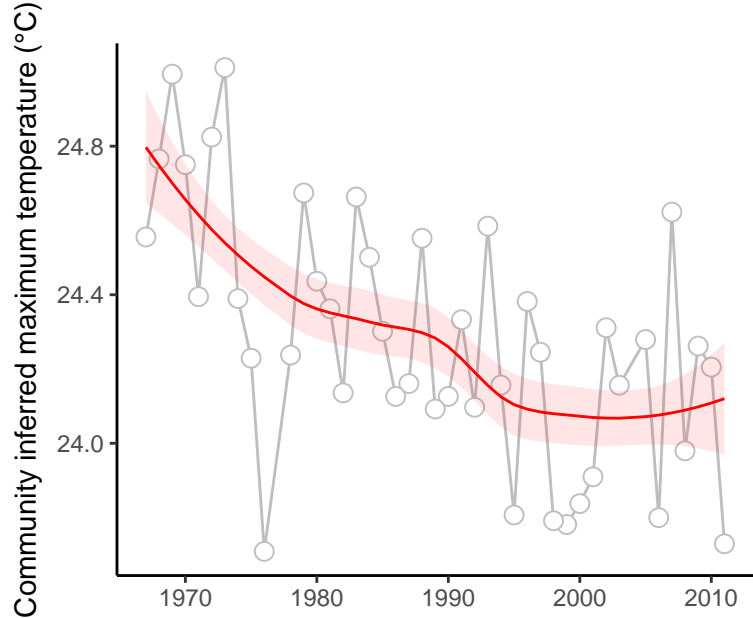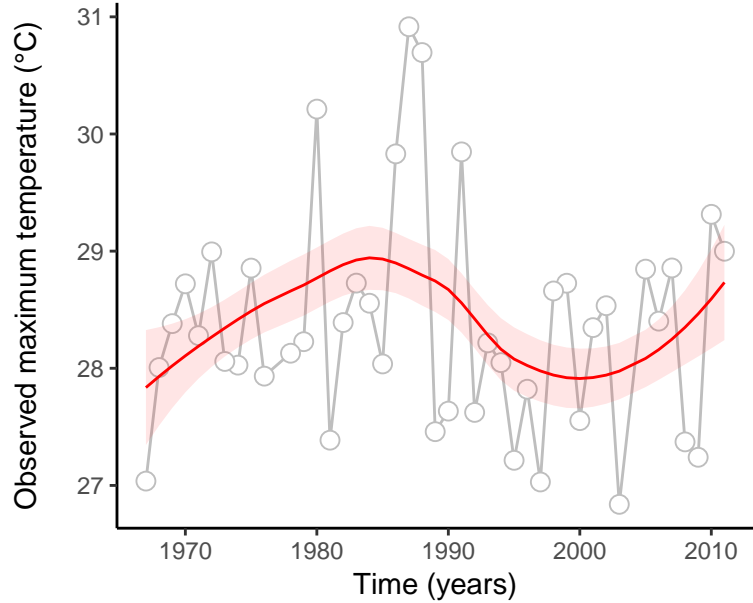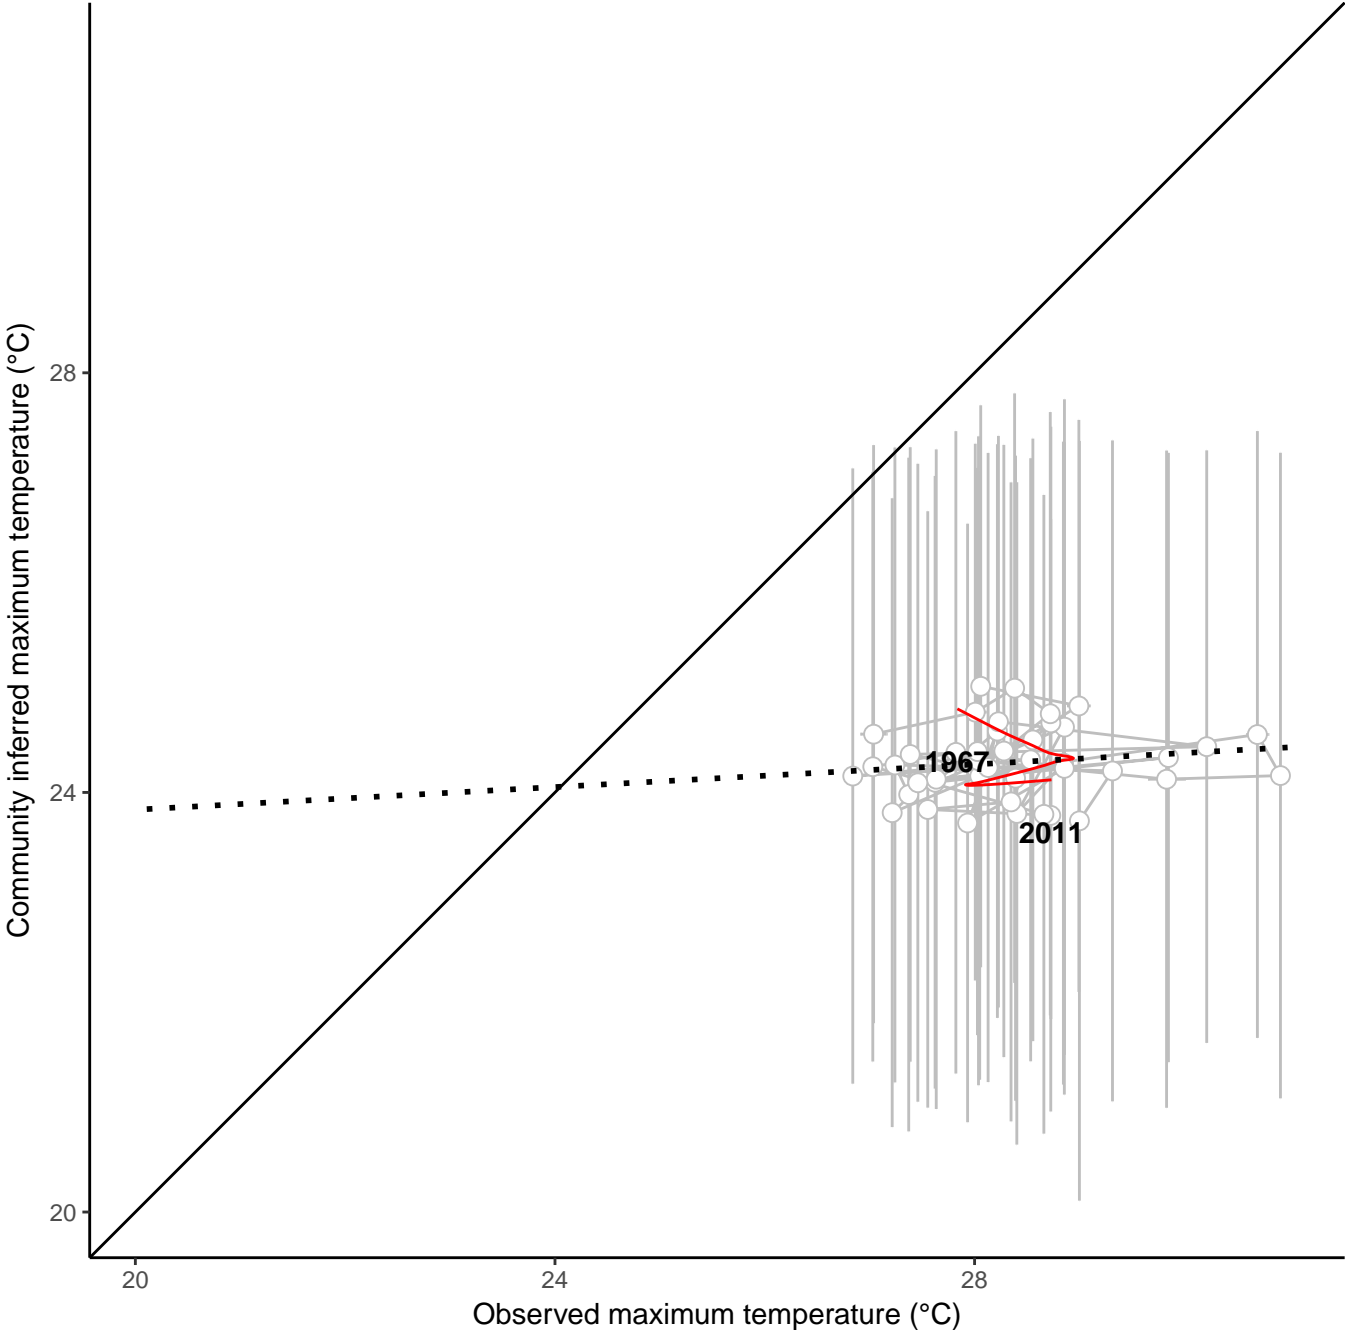

site : 840\_34\_59

absolute deviation = 4 | deviation change = 1.26 | maximum state number = 1

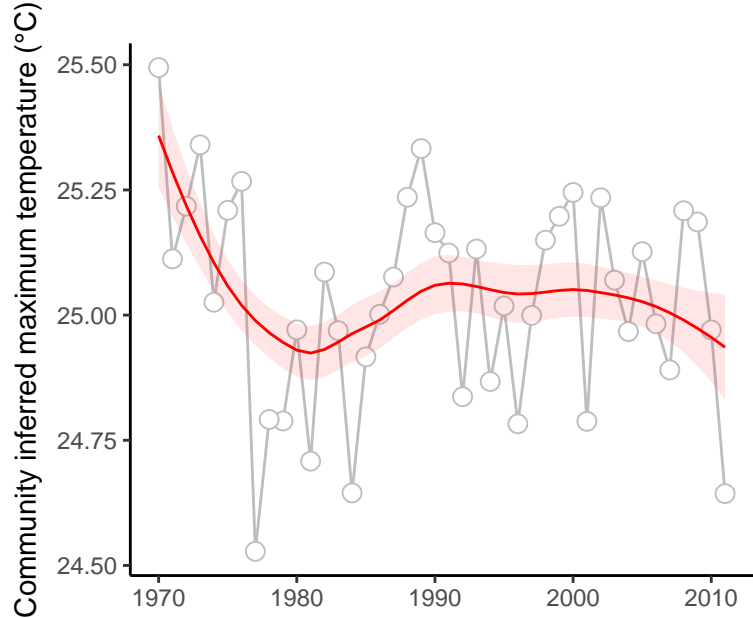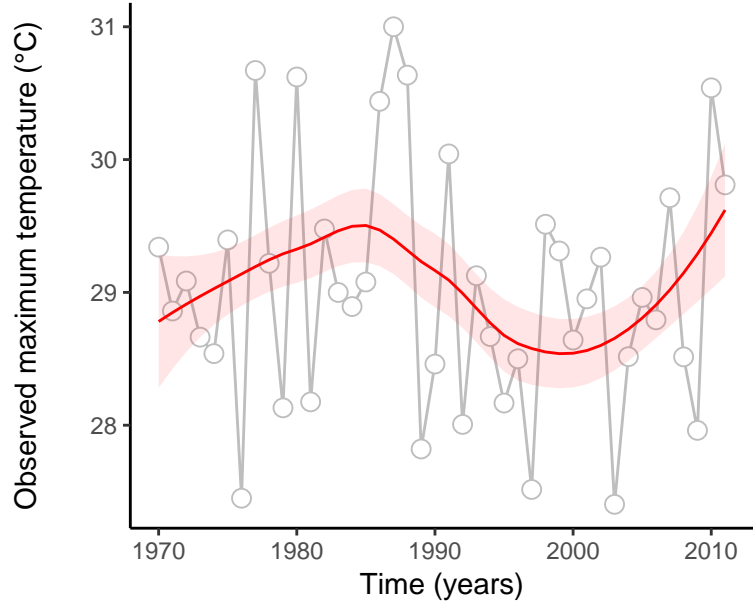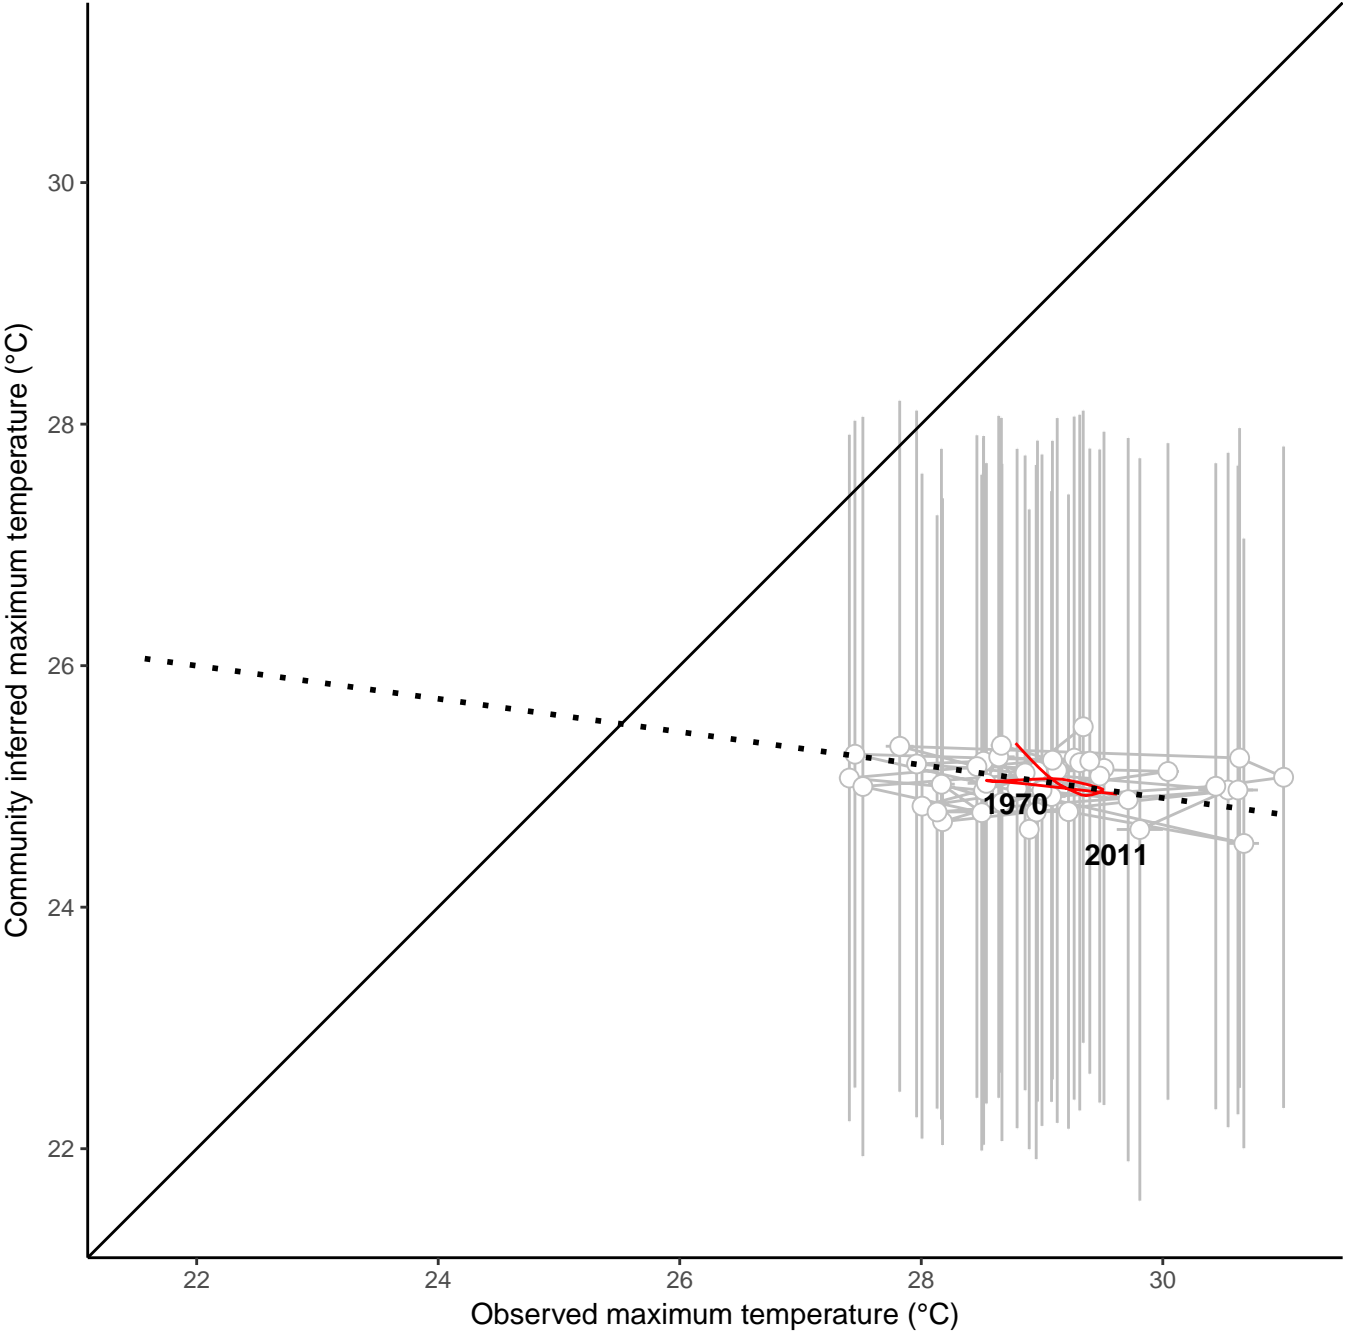

site : 840\_36\_28

absolute deviation = 3.55 | deviation change = 0.99 | maximum state number = 1

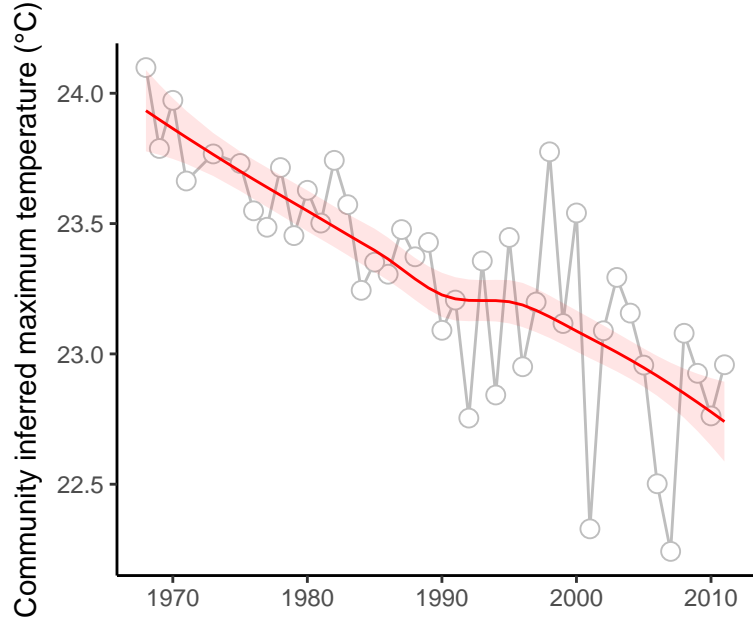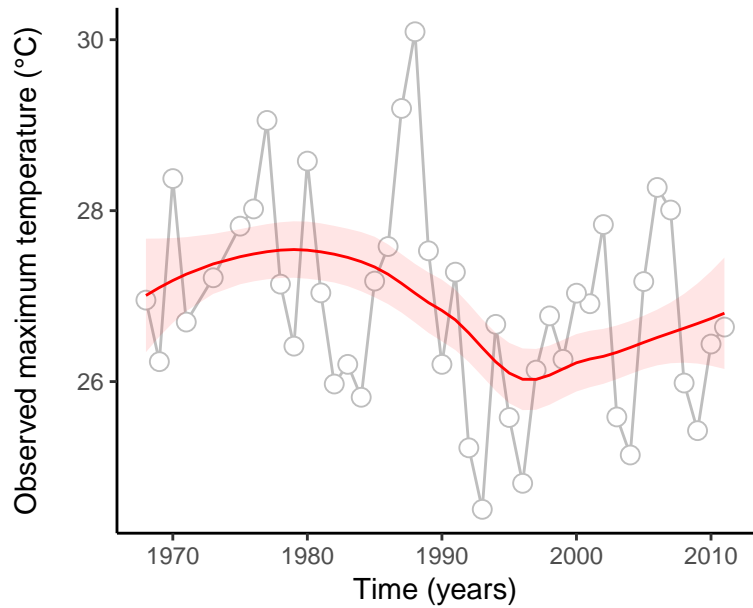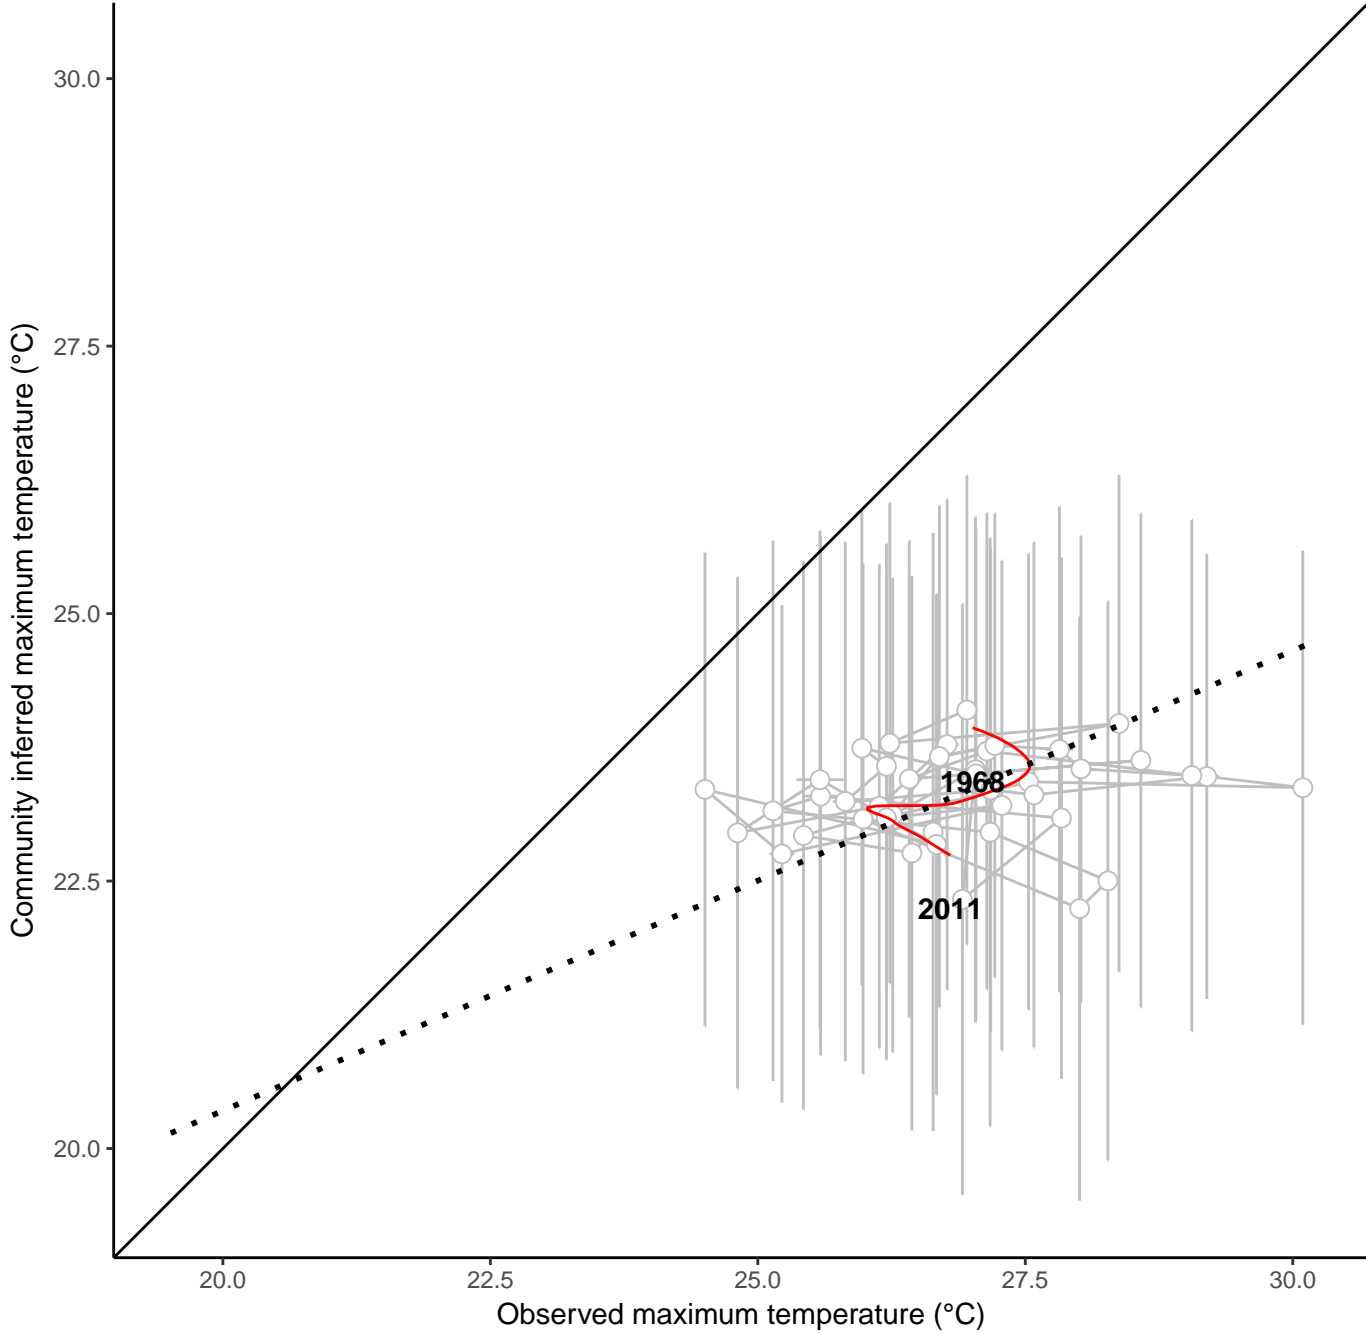

site : 840\_38\_14

absolute deviation = 2.63 | deviation change = 1.32 | maximum state number = 1

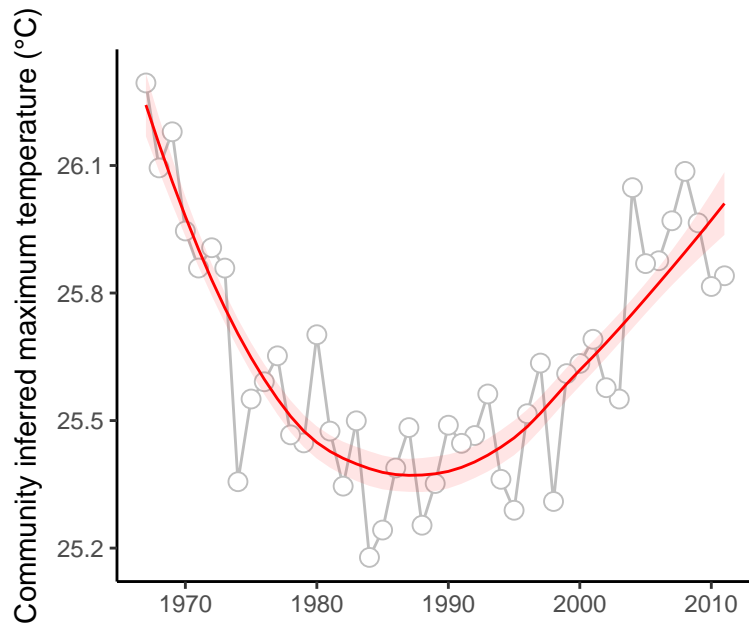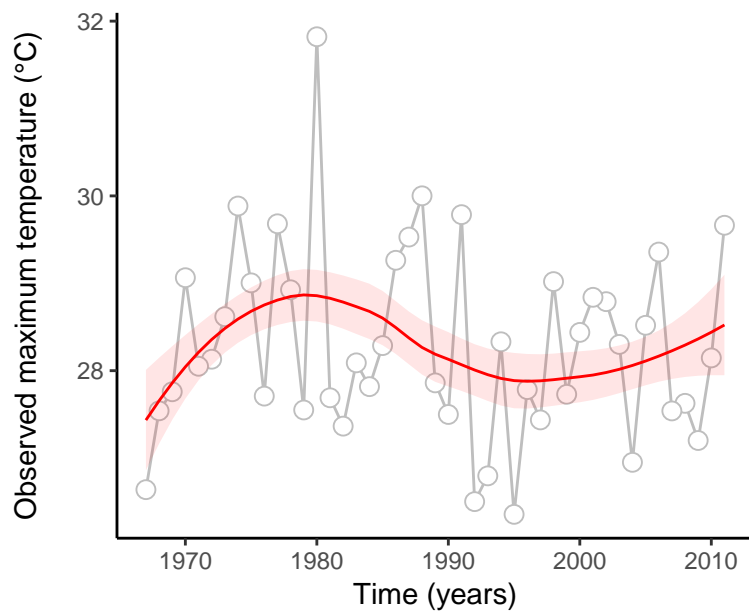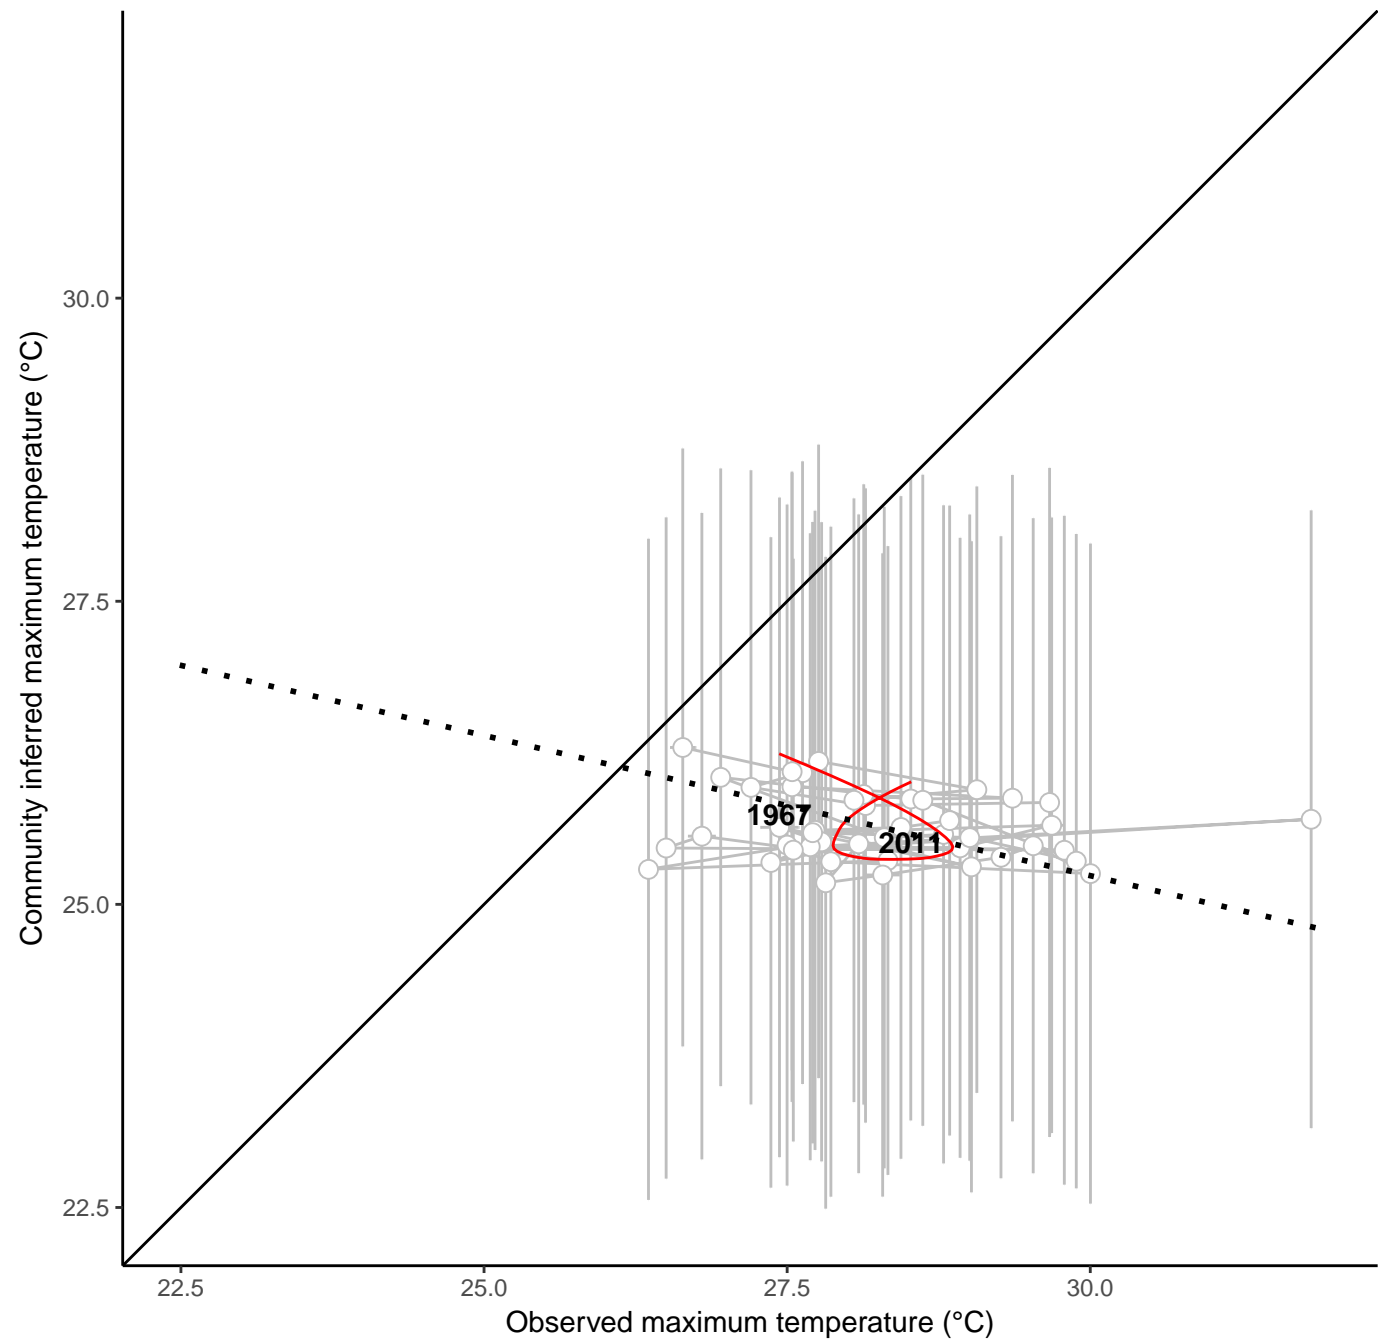



site : 840\_38\_15

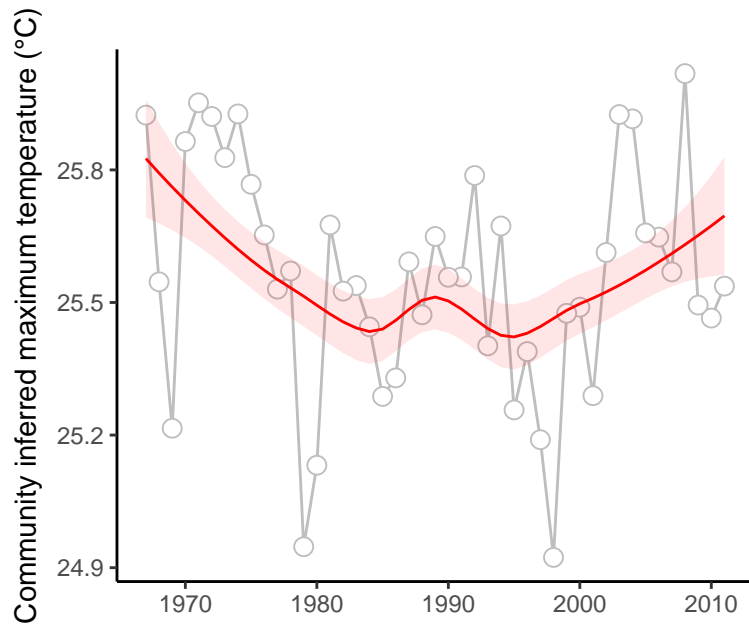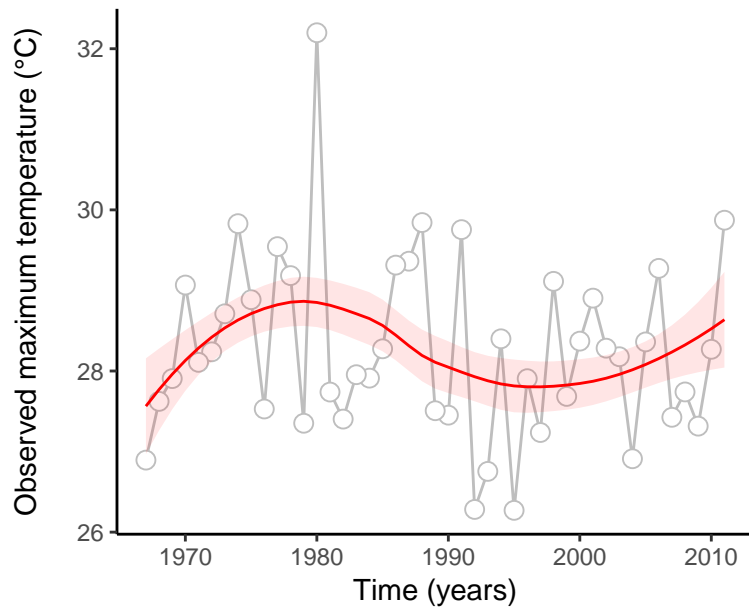

absolute deviation = 2.7 | deviation change = 1.2 | maximum state number = 1

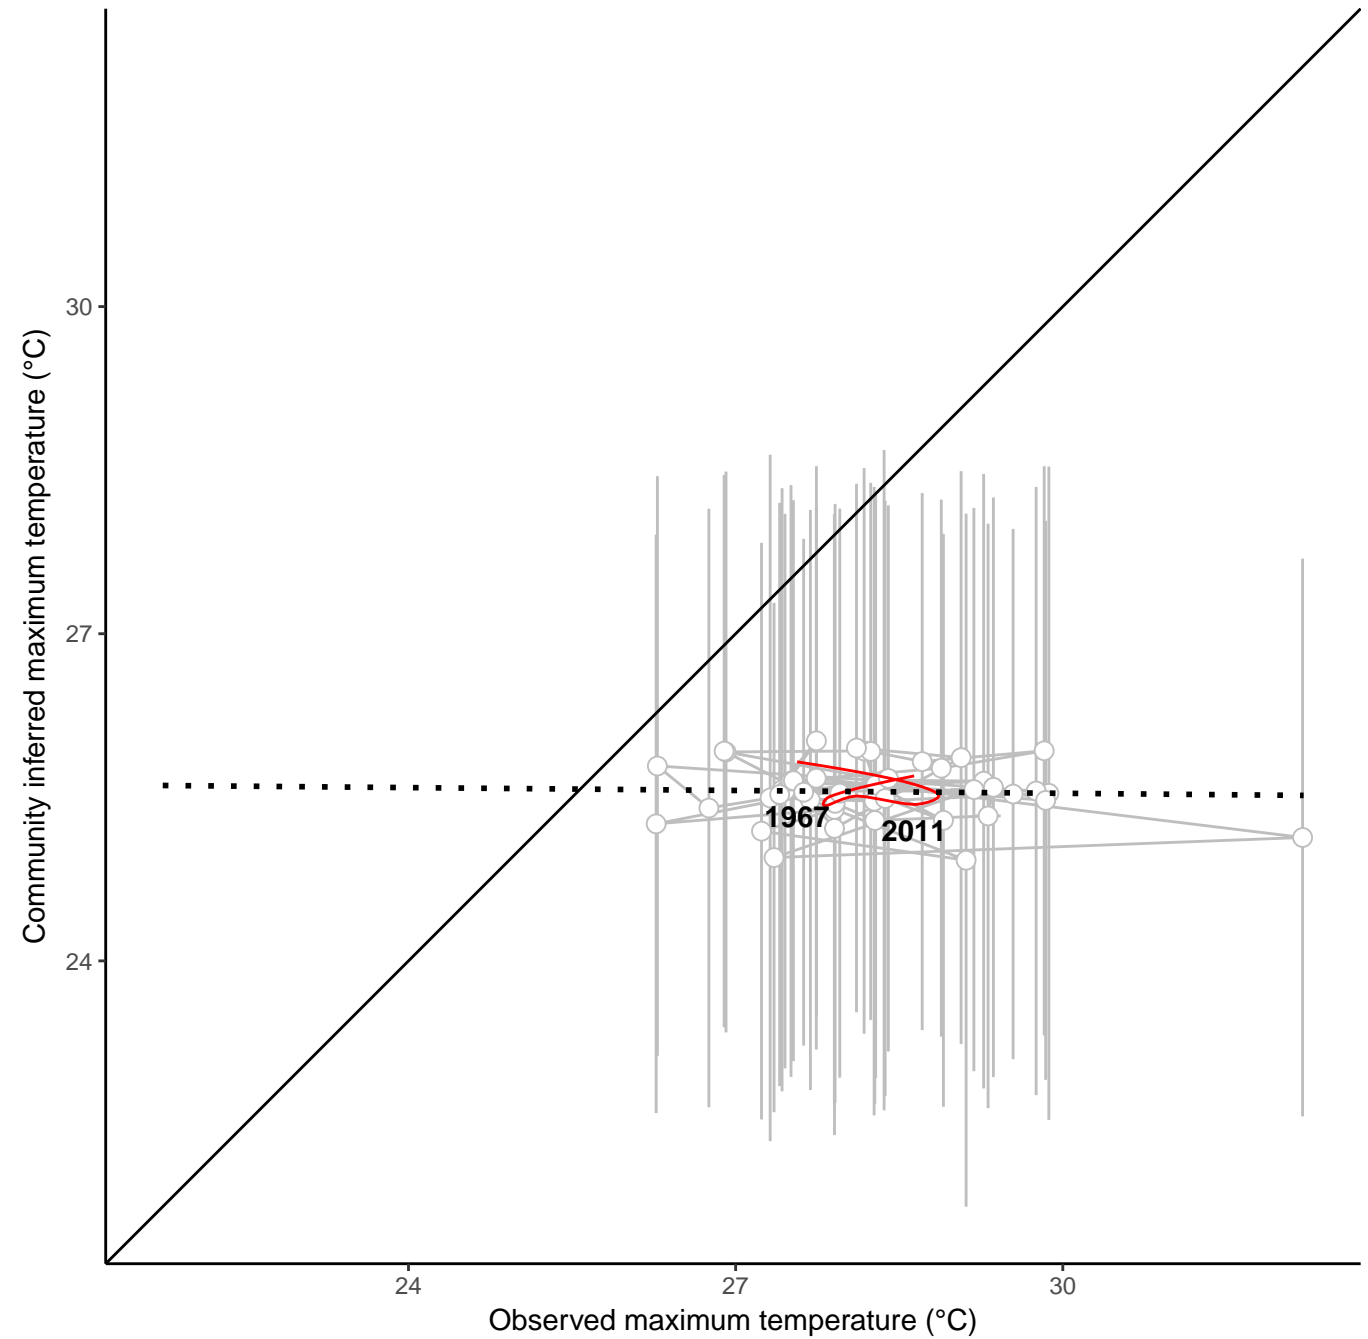

site : 840\_60\_6

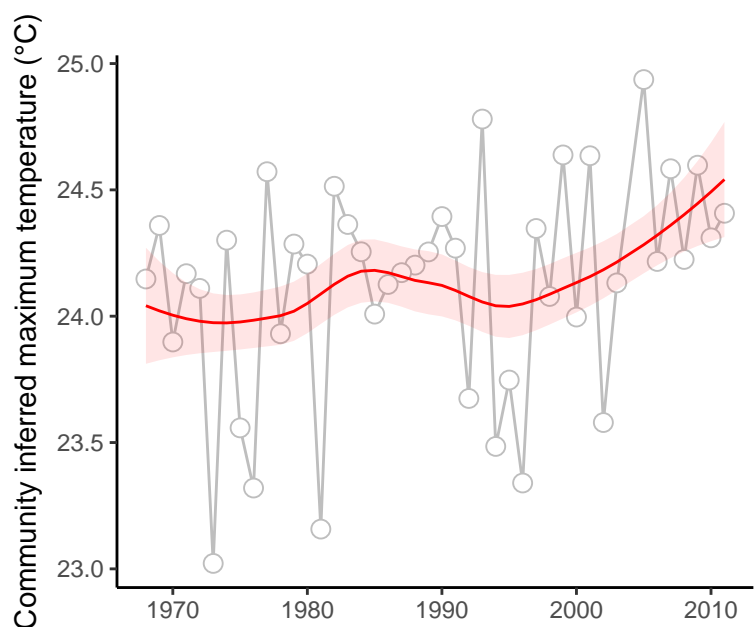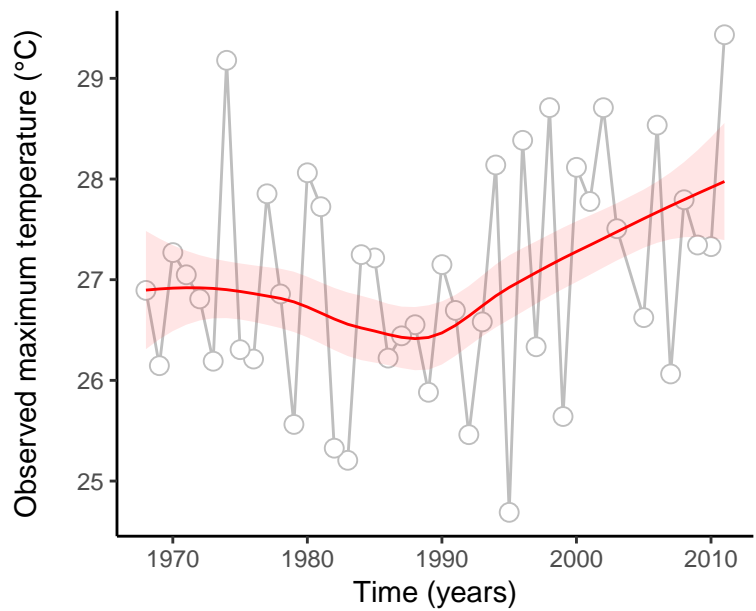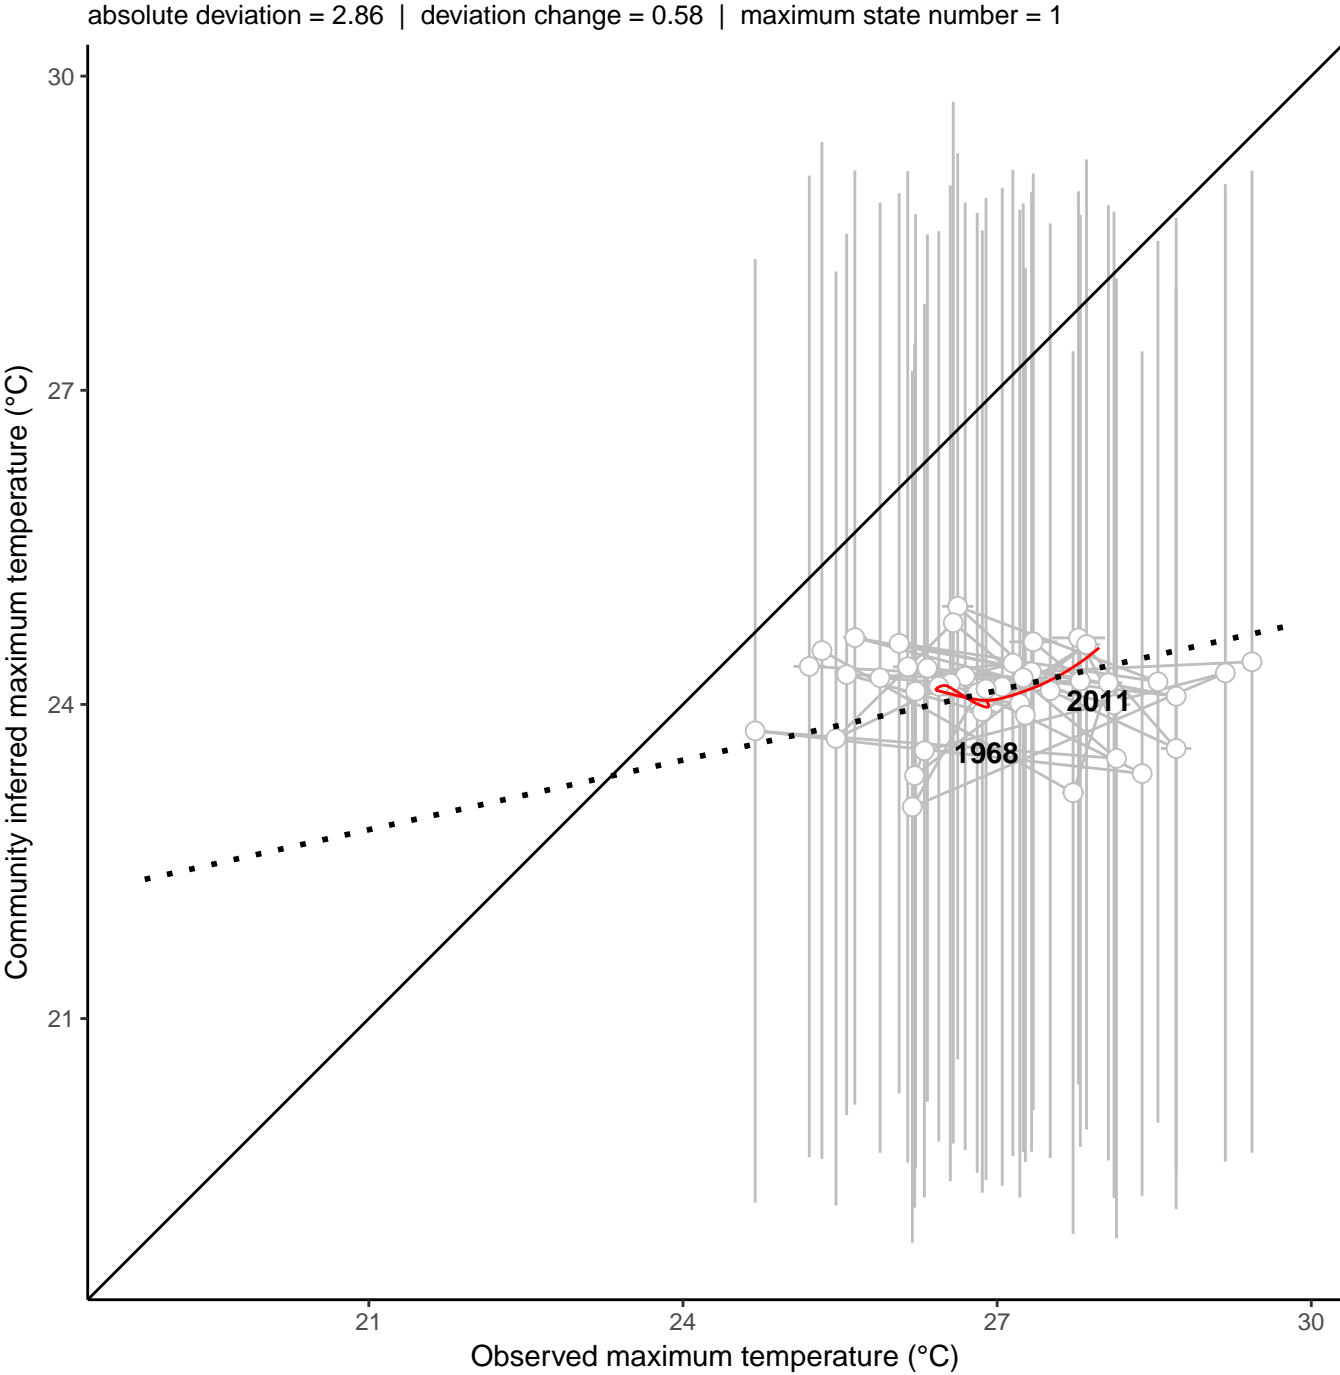

site : 840\_61\_32

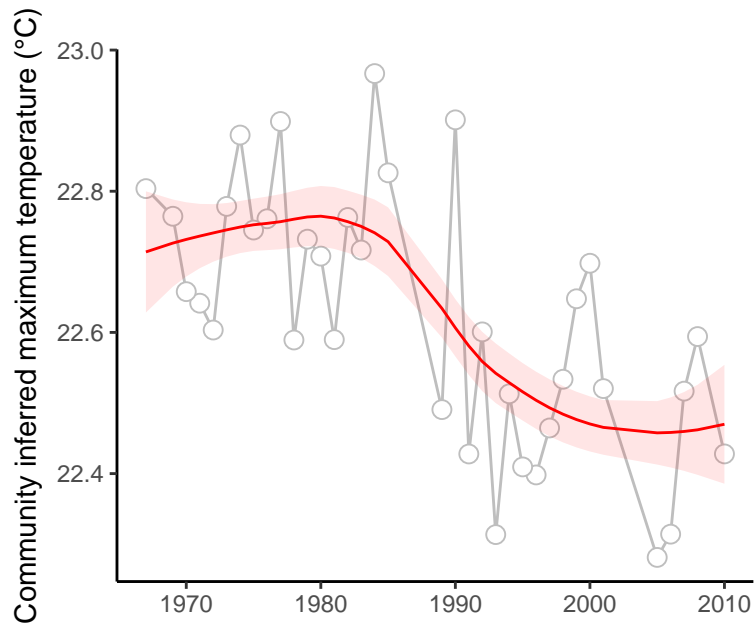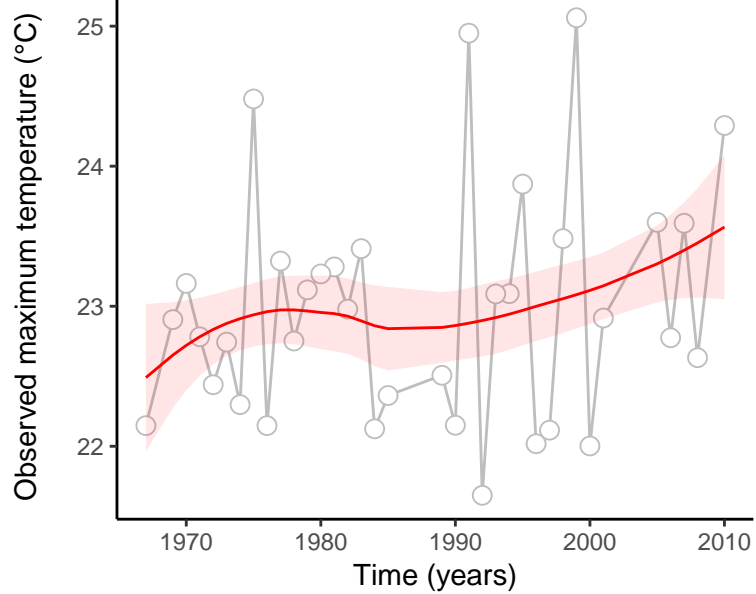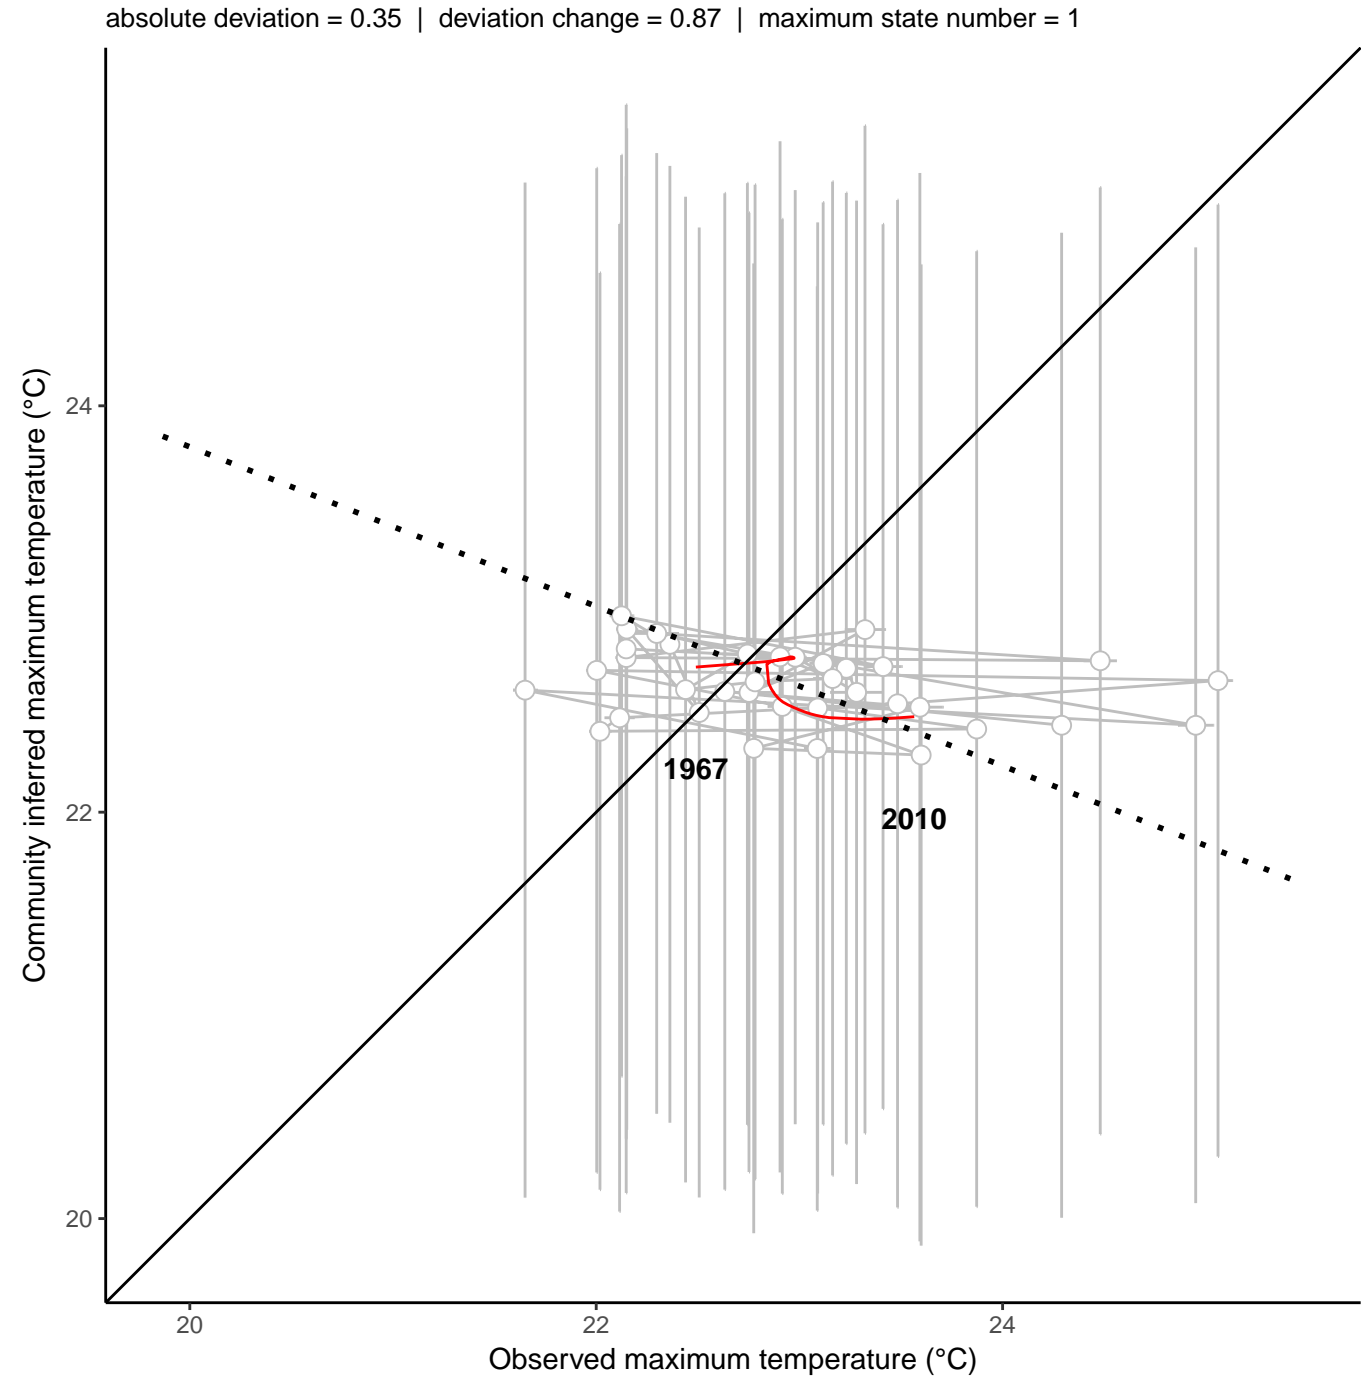

site : 840\_61\_47

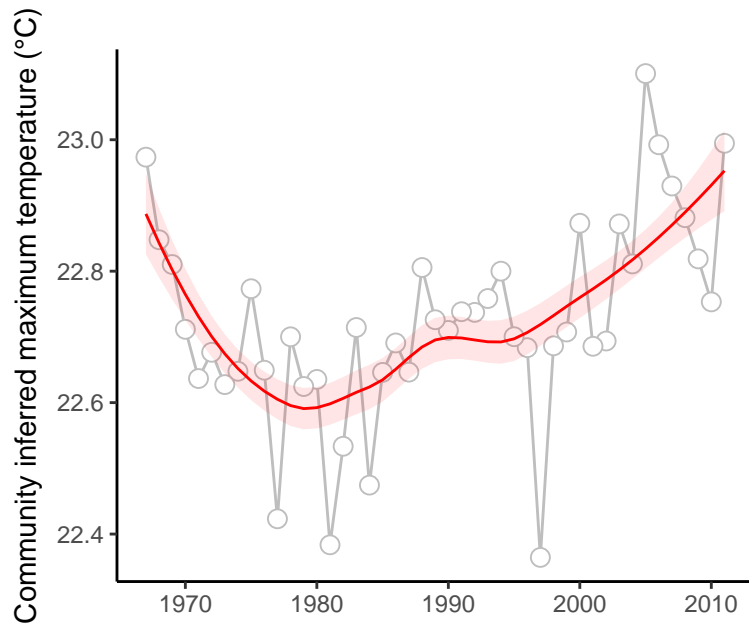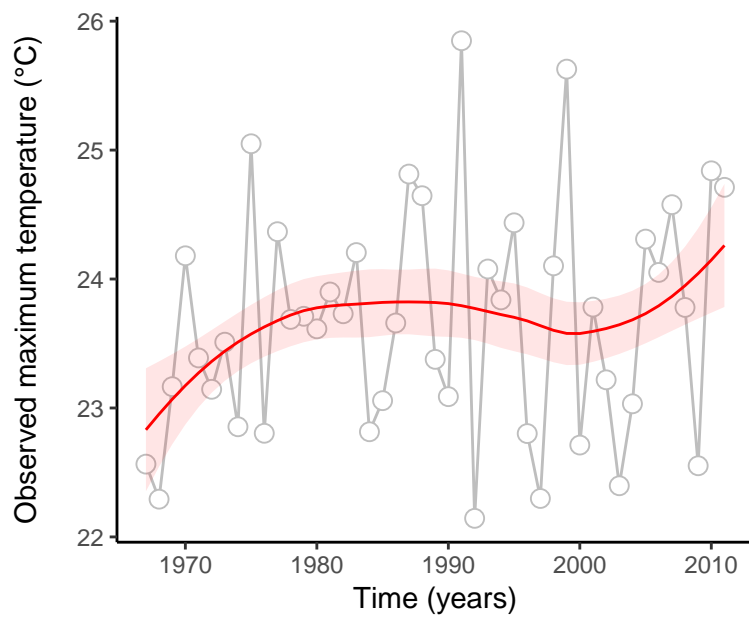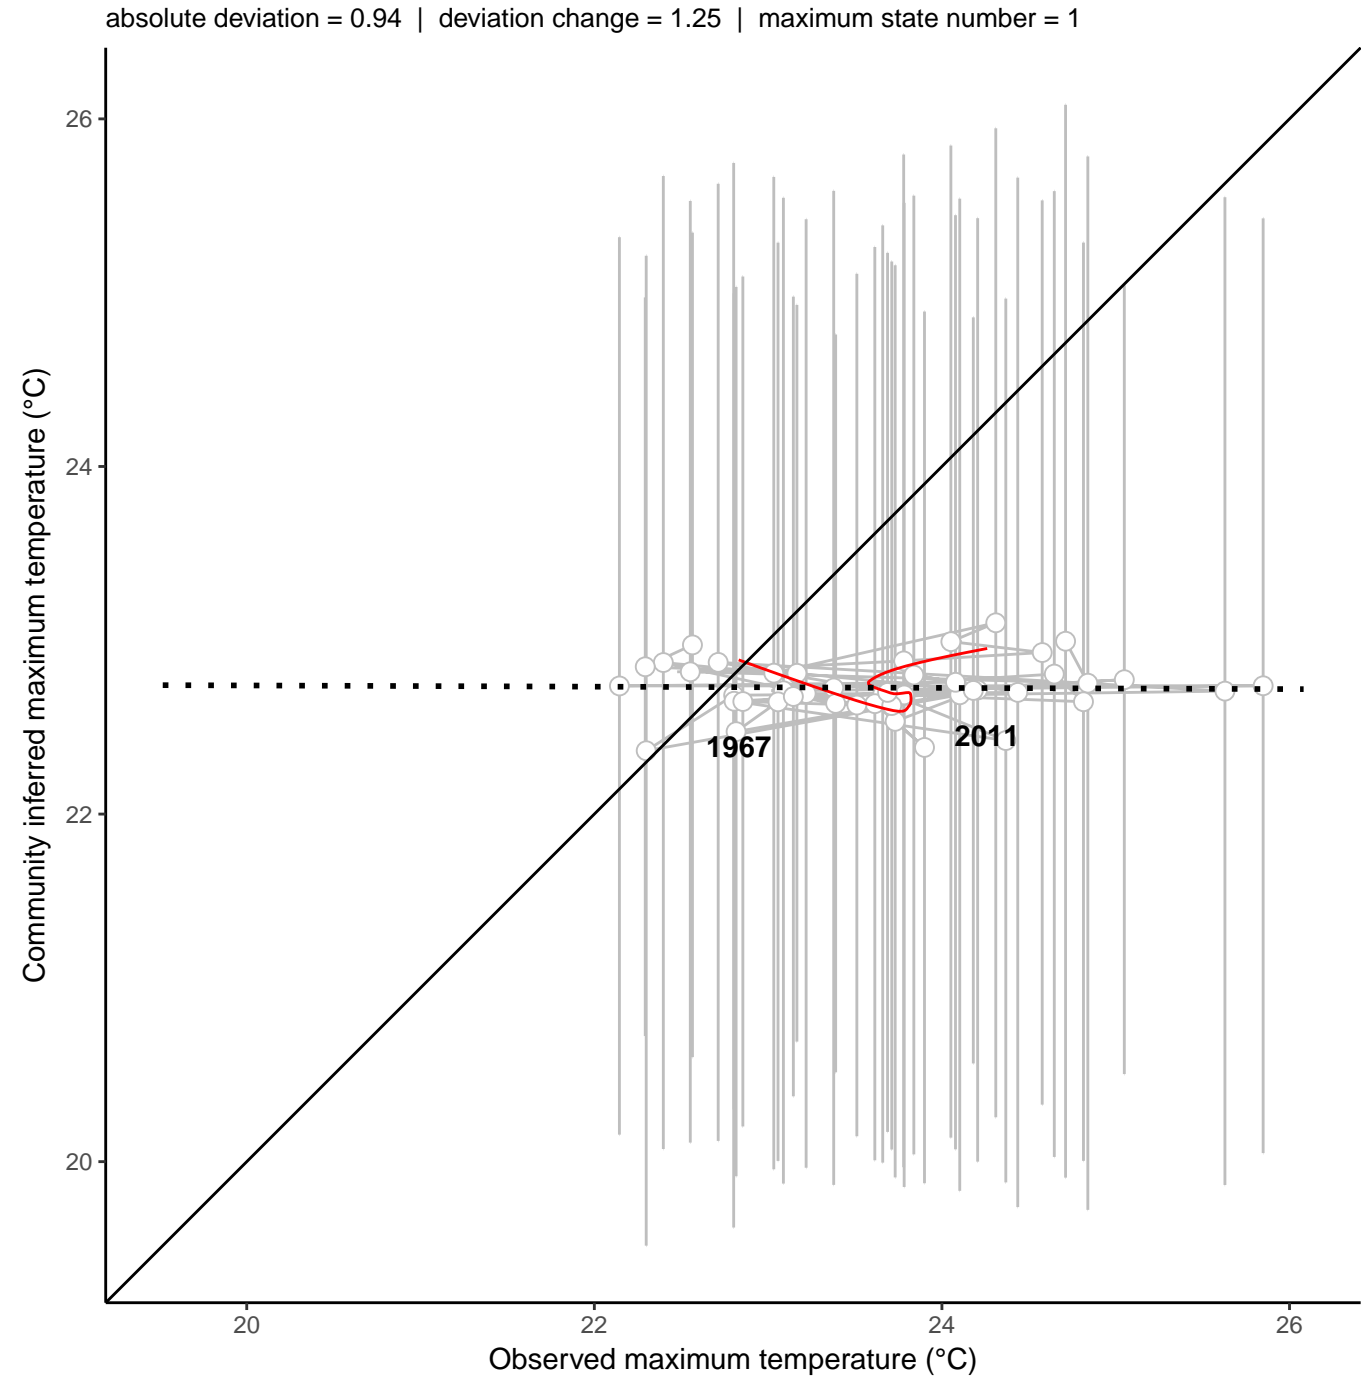

site : 840\_82\_1

absolute deviation = 4.57 | deviation change = 0.24 | maximum state number = 1

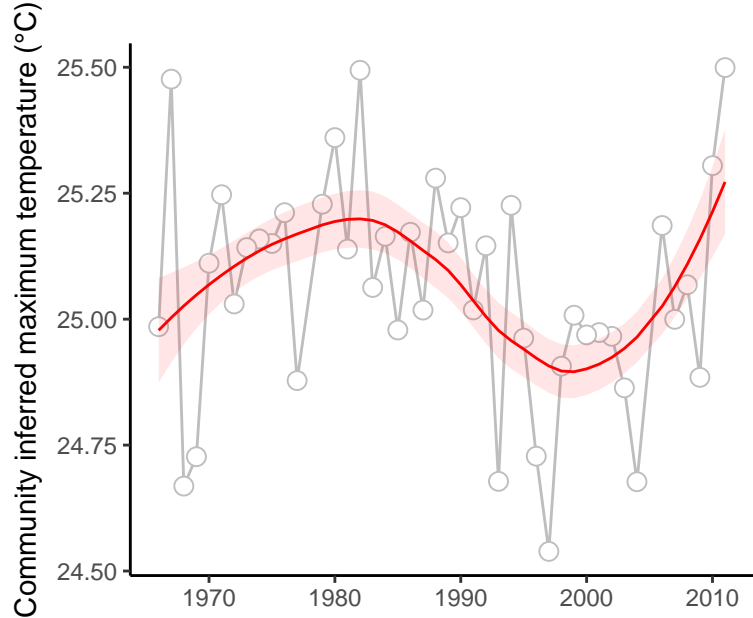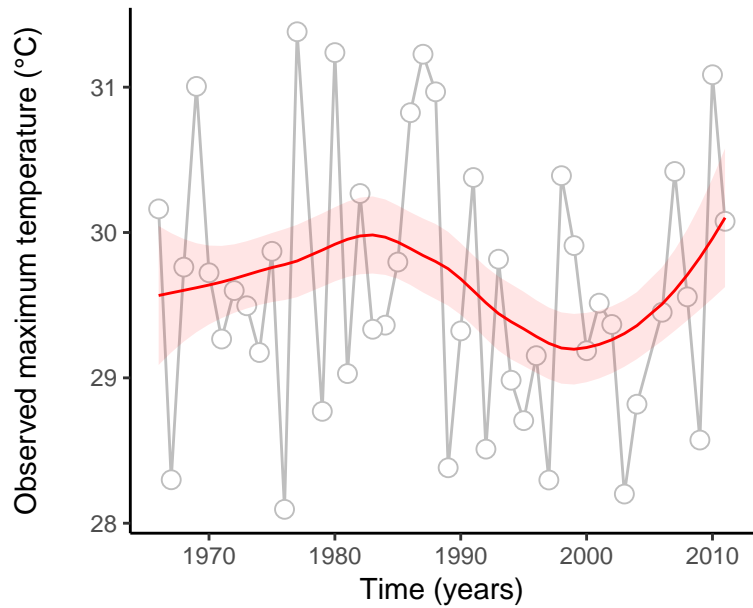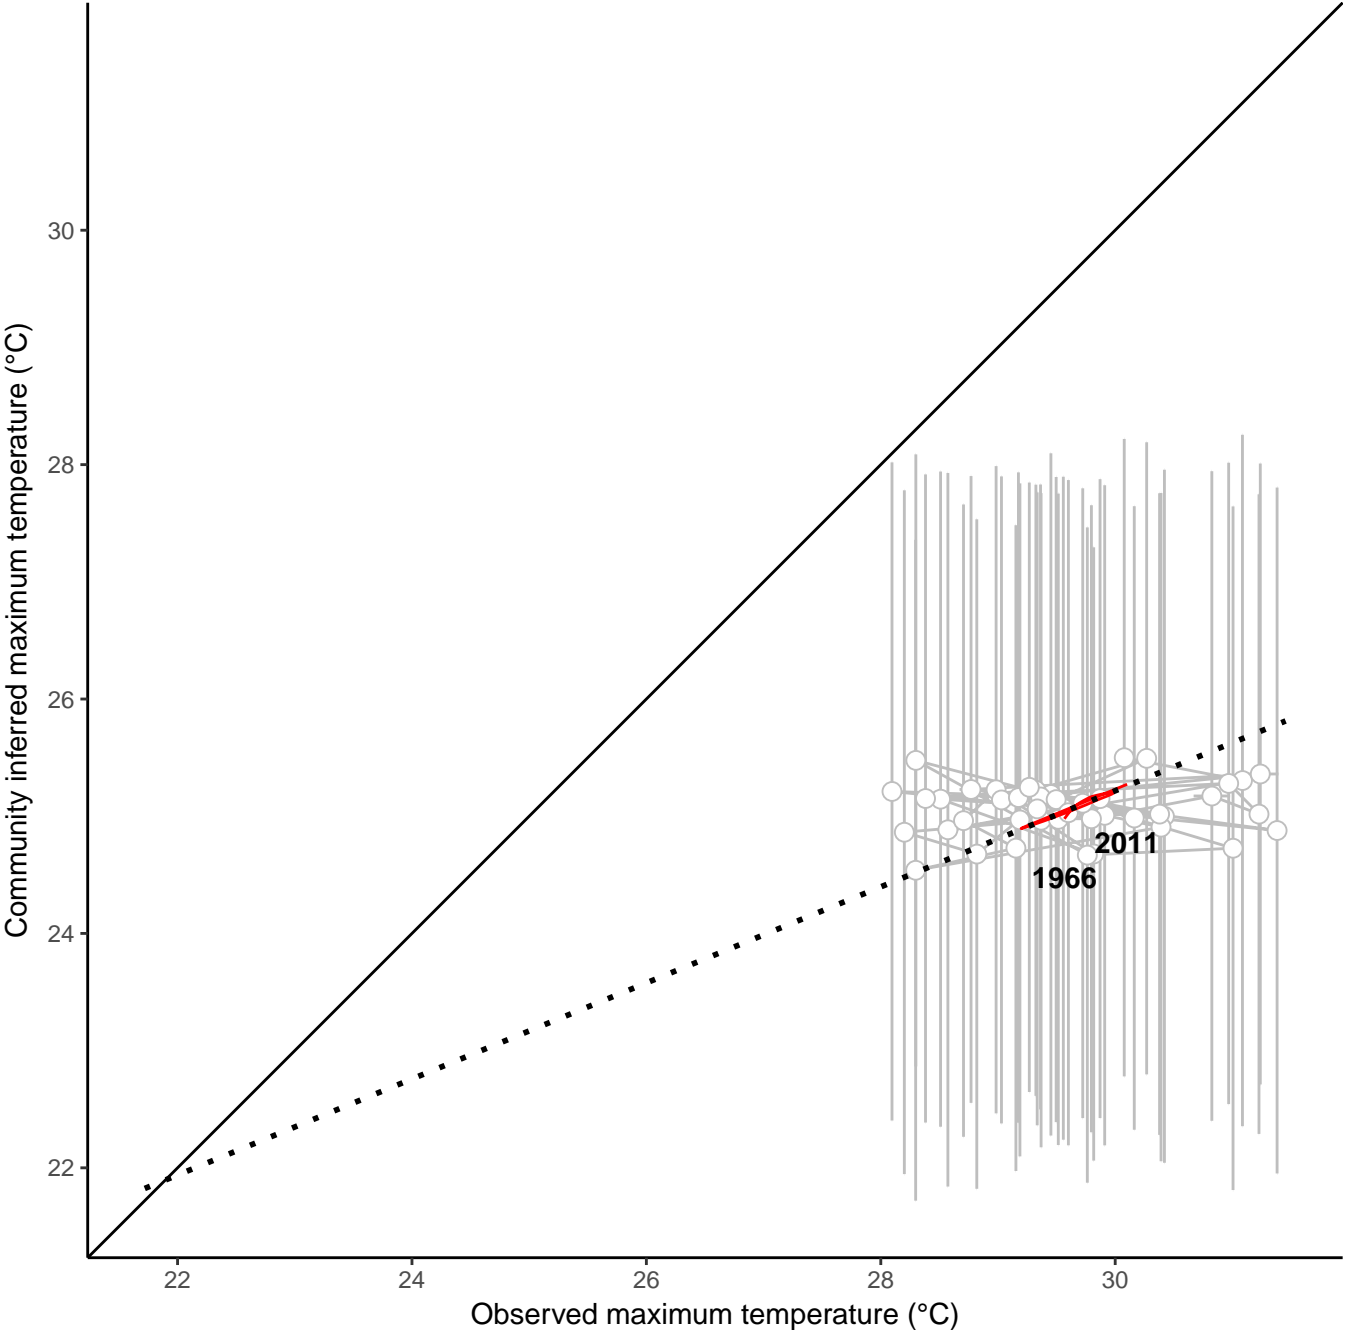

site : 840\_88\_28

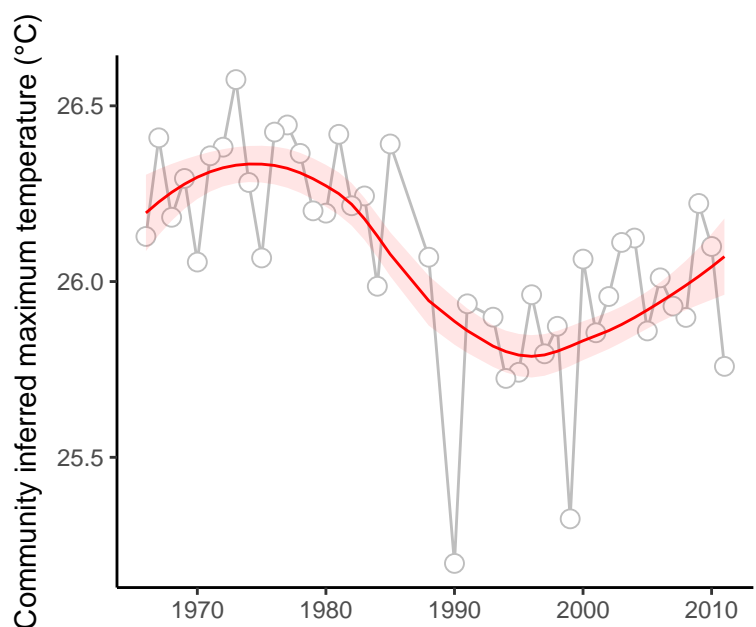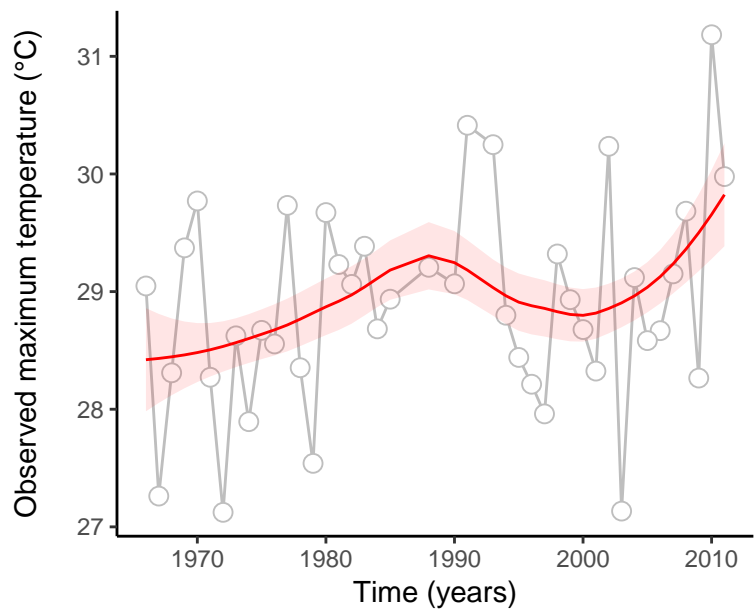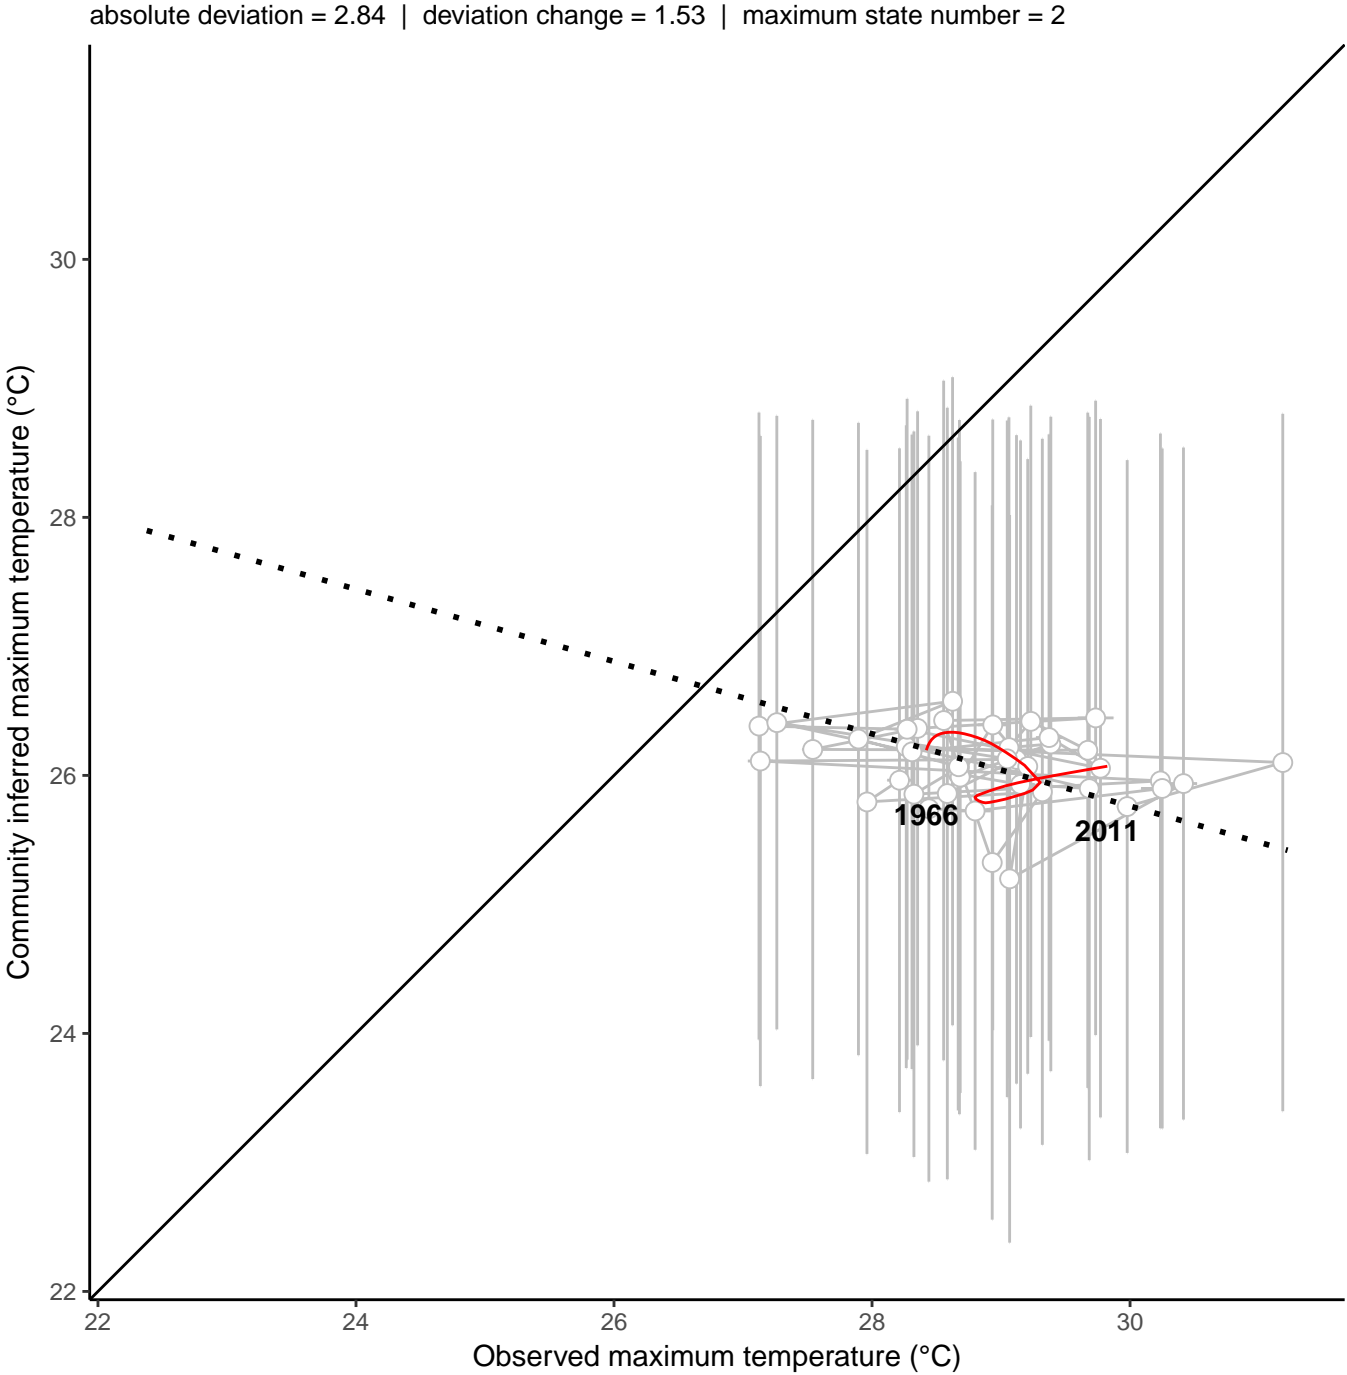

site : 840\_88\_43

absolute deviation = 3.78 | deviation change = 1.83 | maximum state number = 1

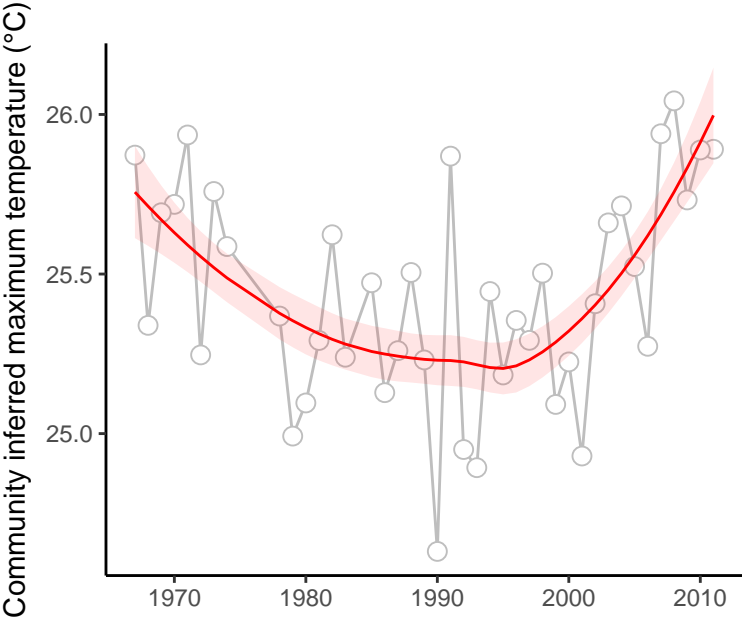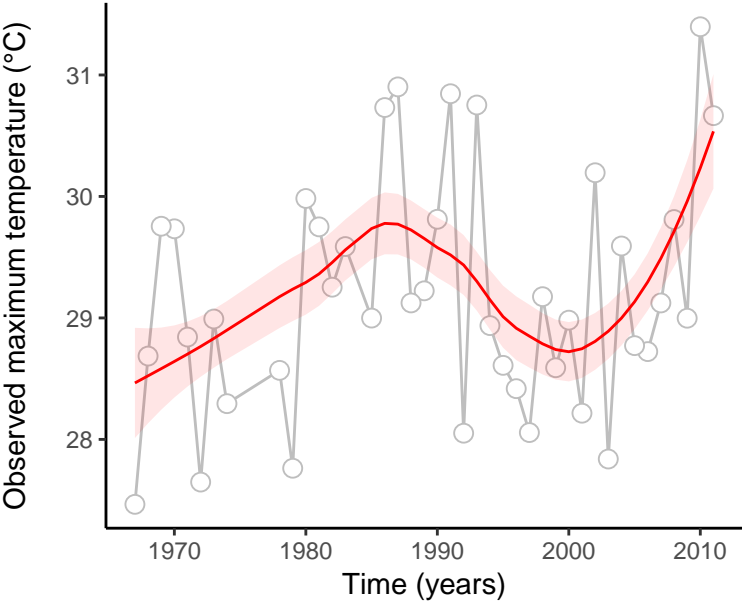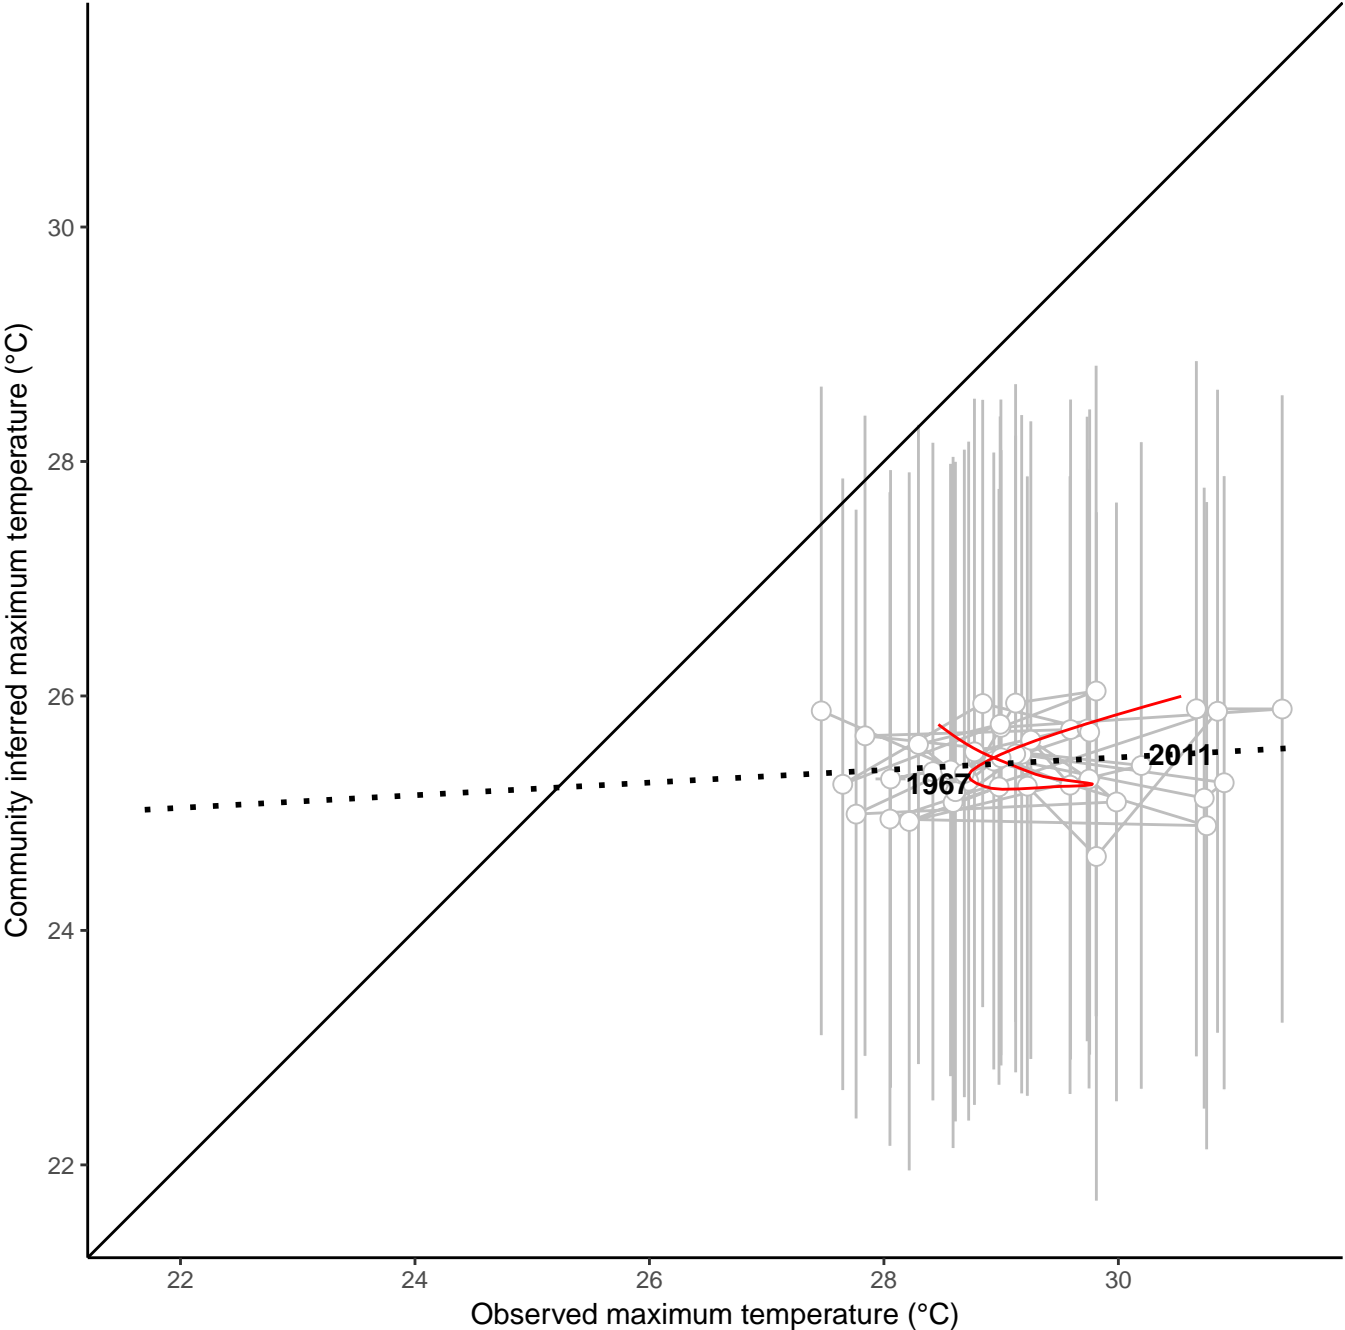

site : 840\_27\_36

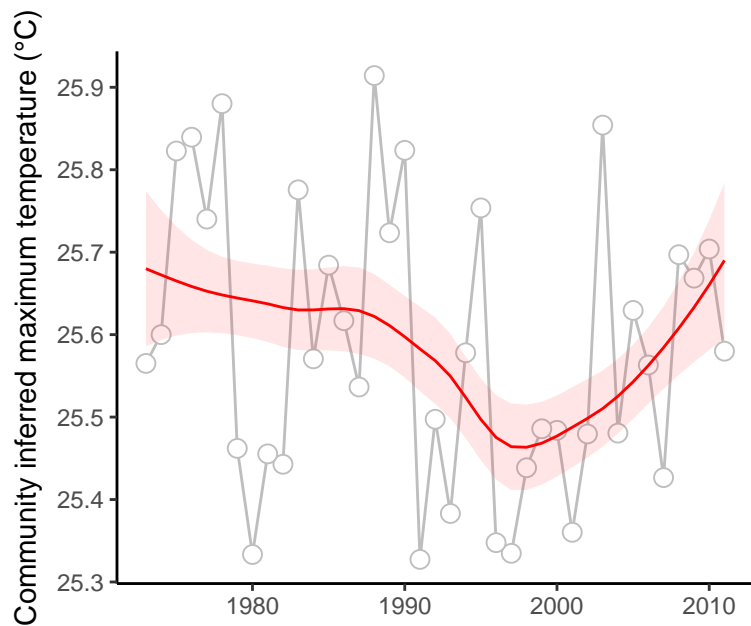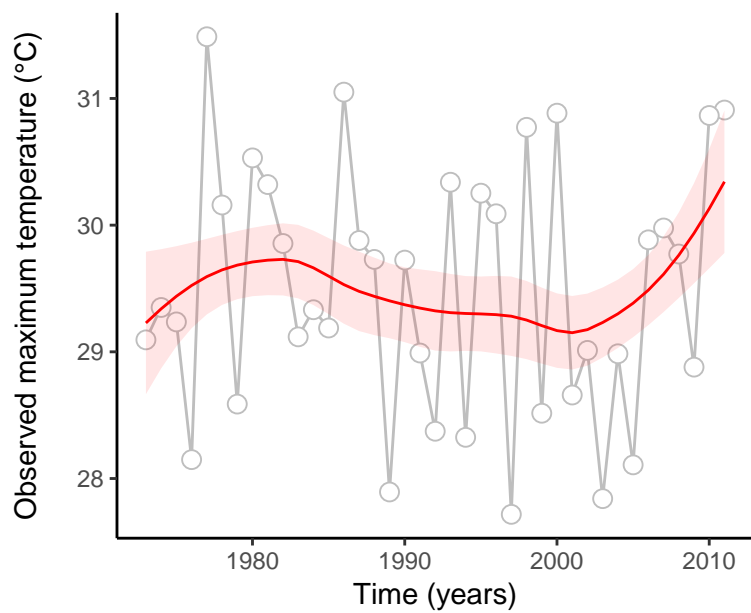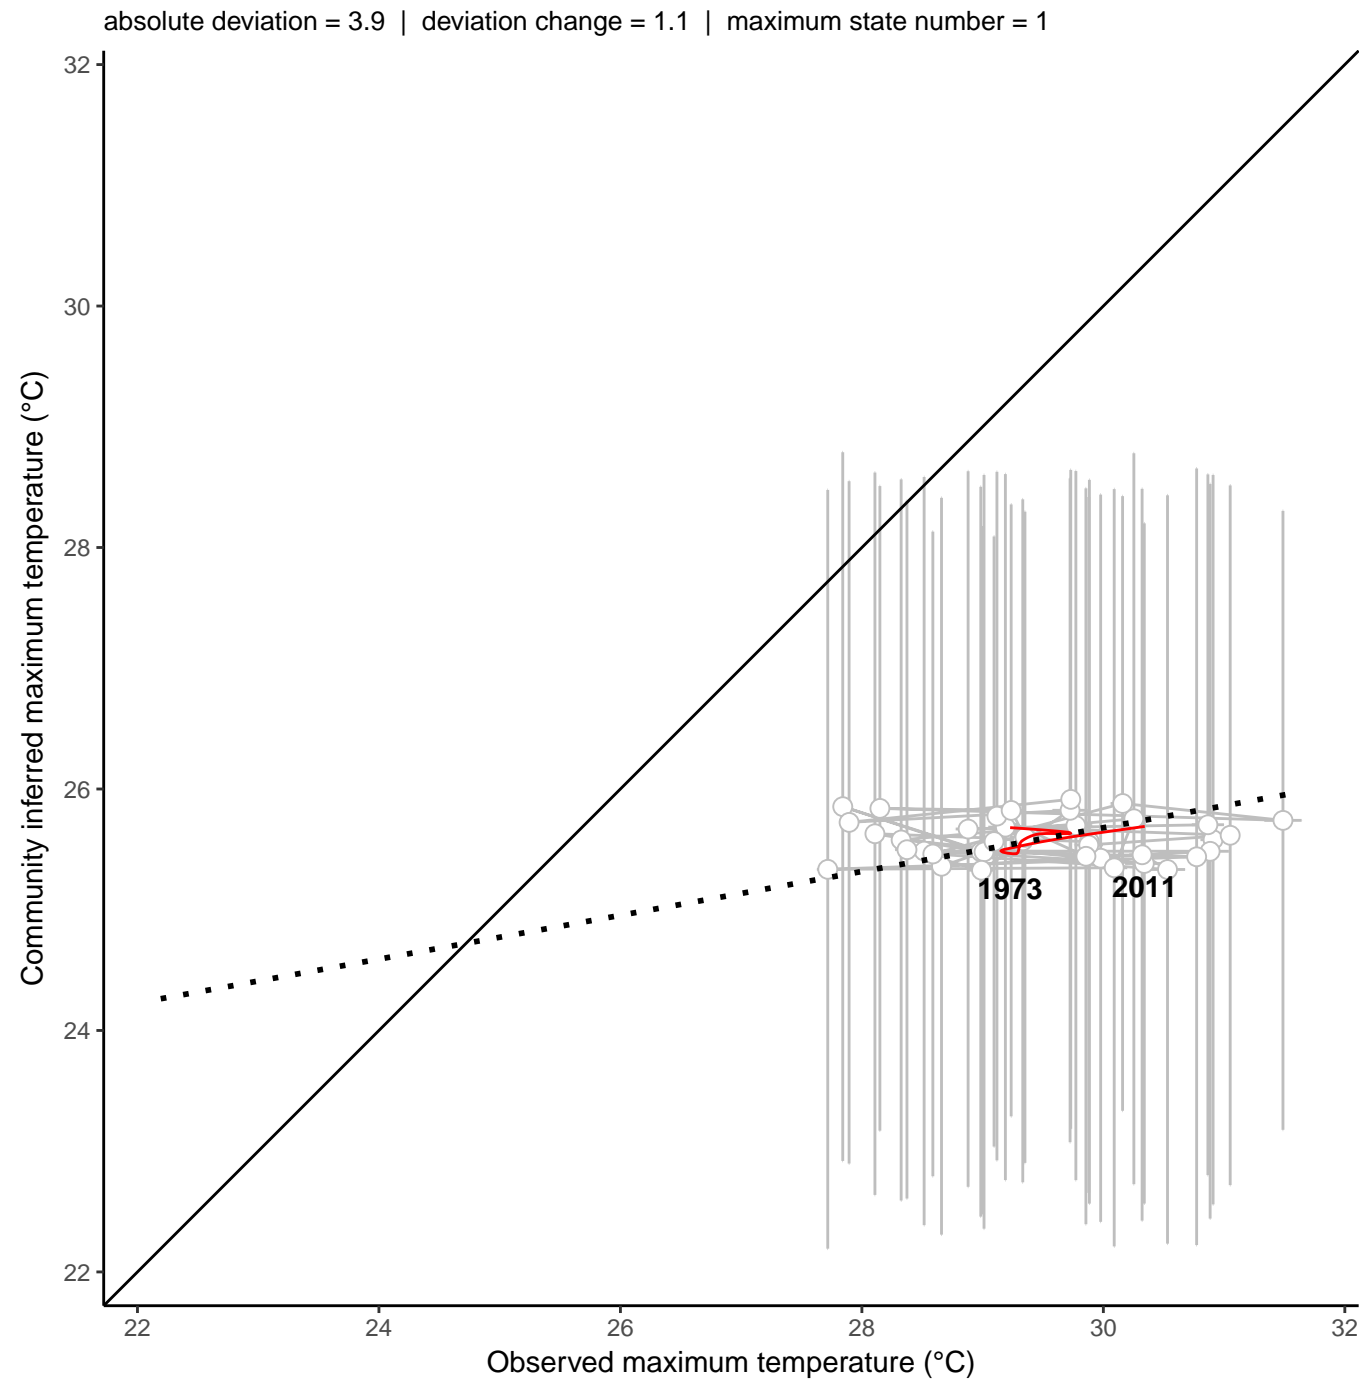



site : 840\_36\_1

absolute deviation = 2.91 | deviation change = 1.64 | maximum state number = 1

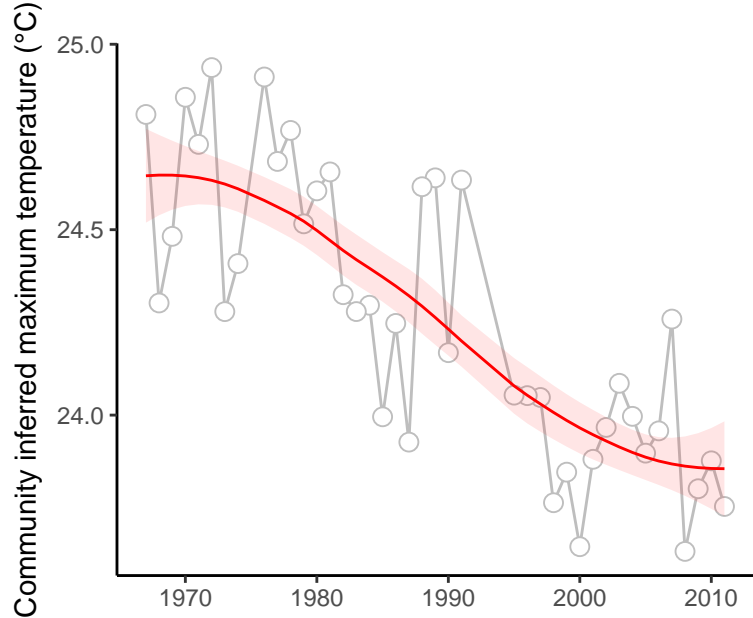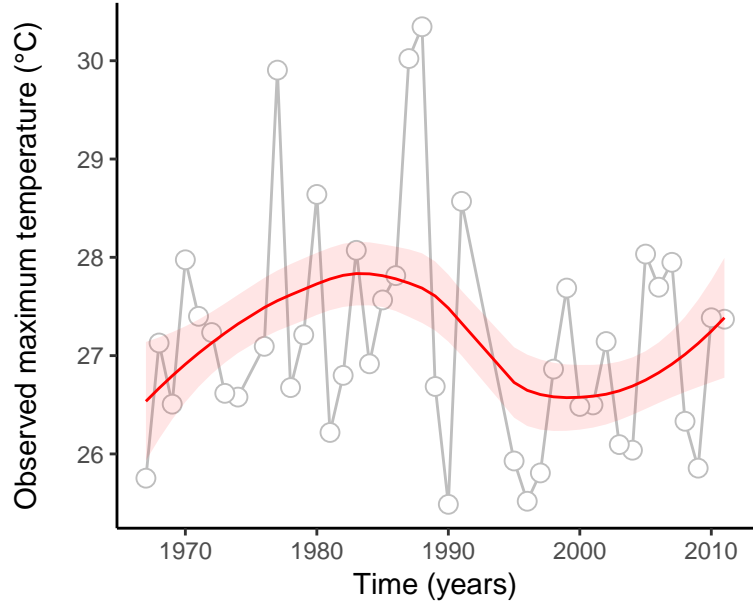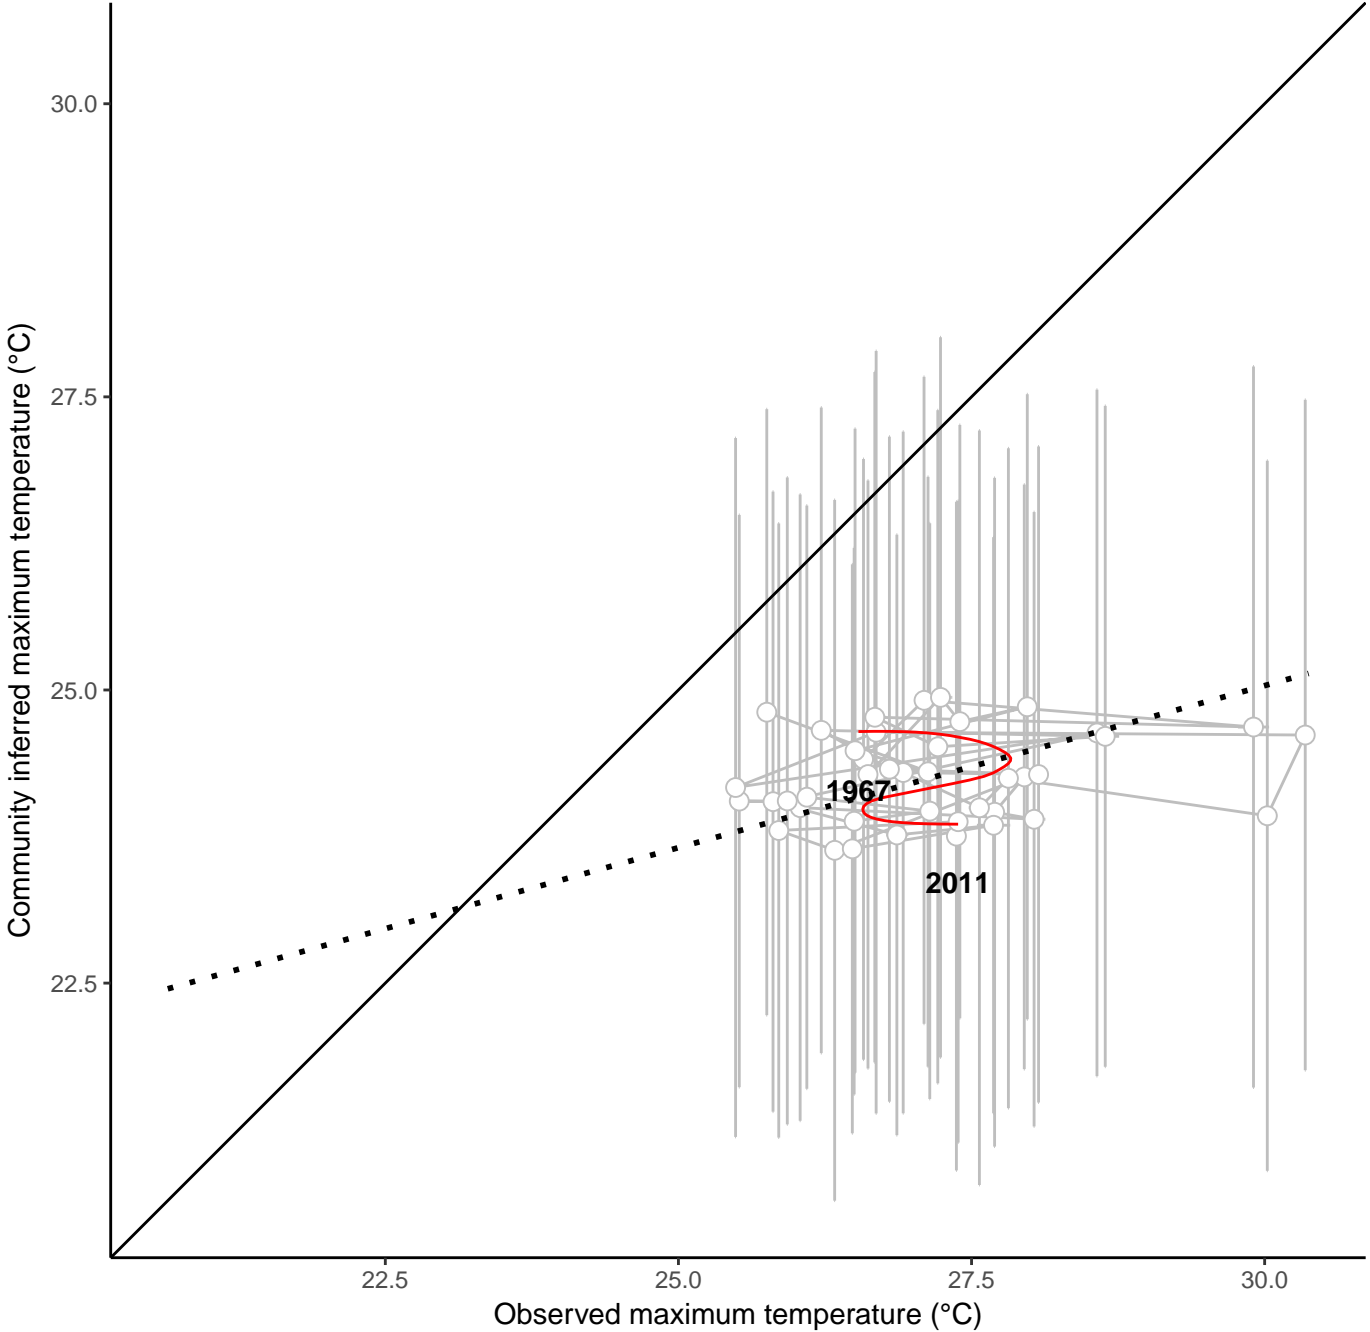

site : 840\_42\_23

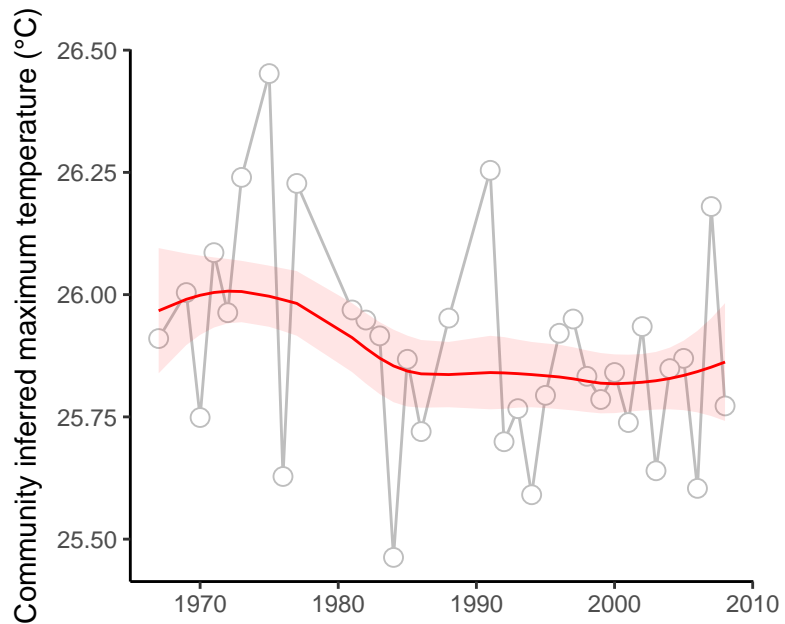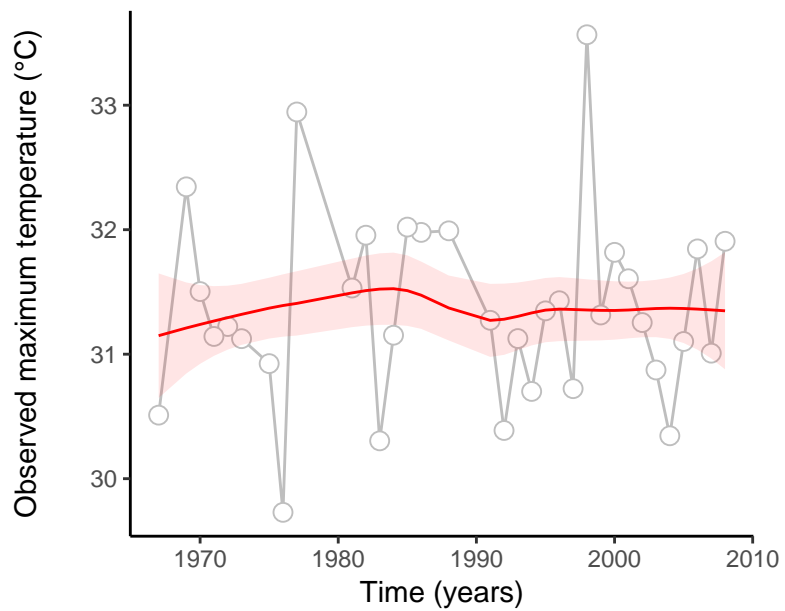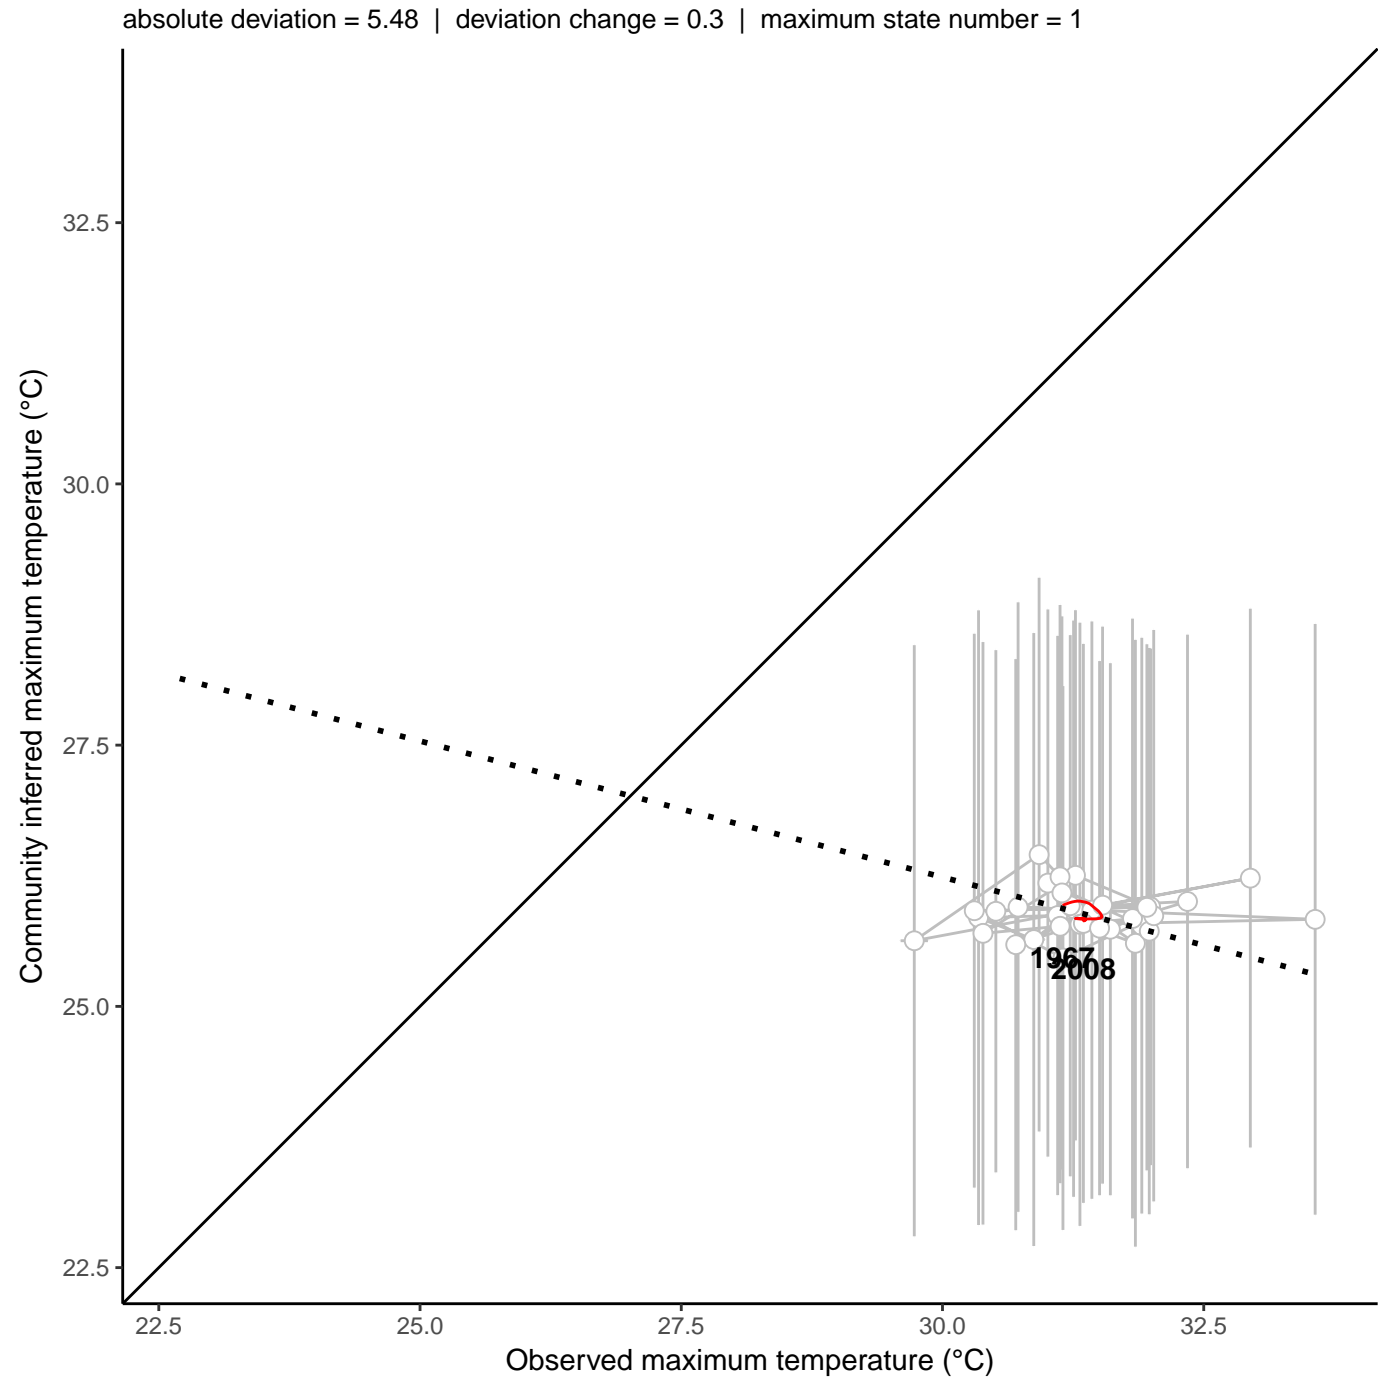

site : 840\_46\_35

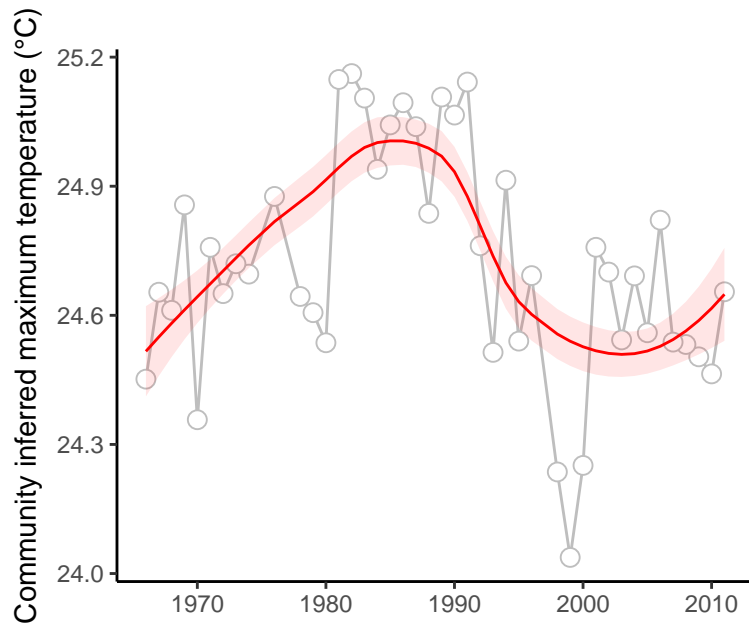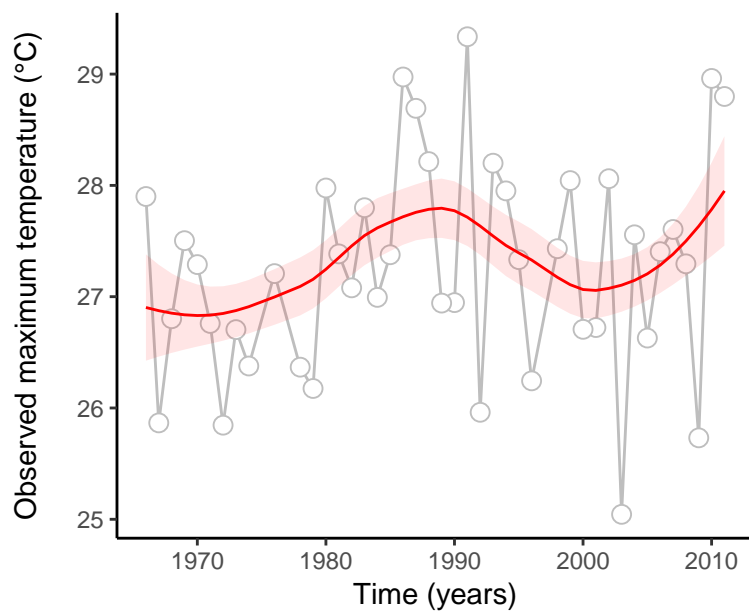

absolute deviation = 2.59 | deviation change = 0.92 | maximum state number = 1

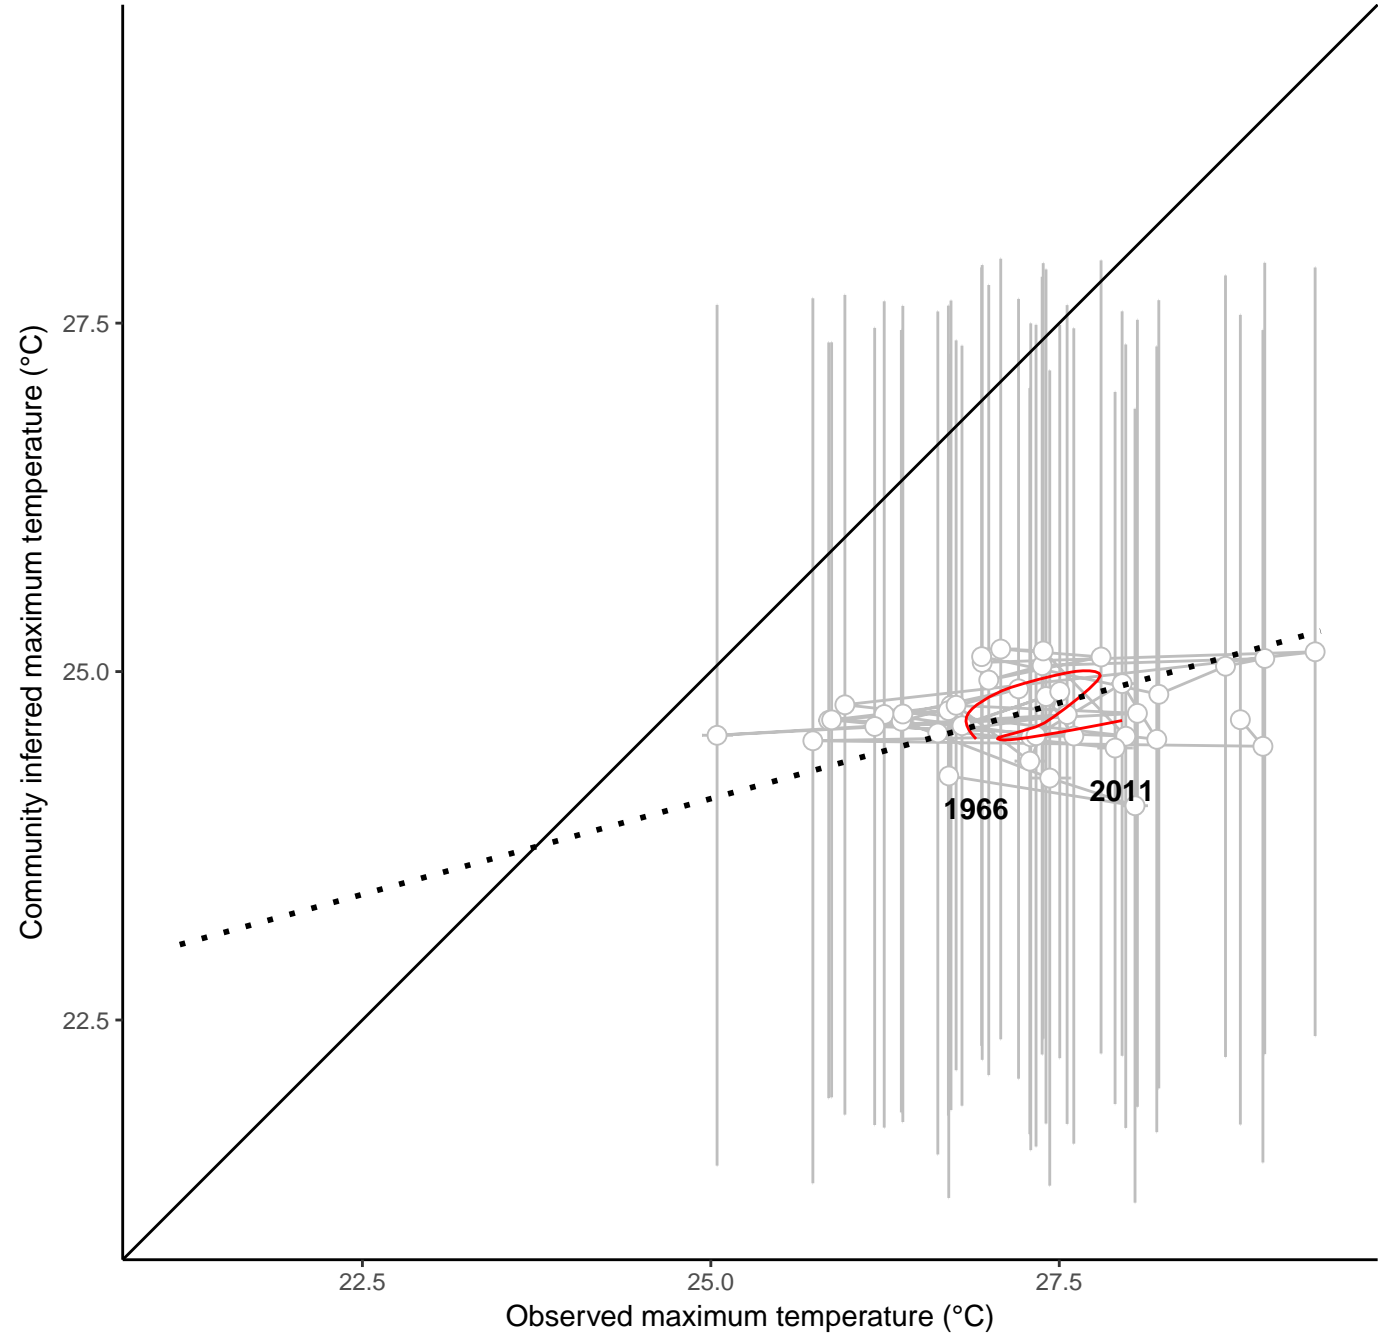

site : 840\_47\_7

absolute deviation = 1.08 | deviation change = -0.47 | maximum state number = 2

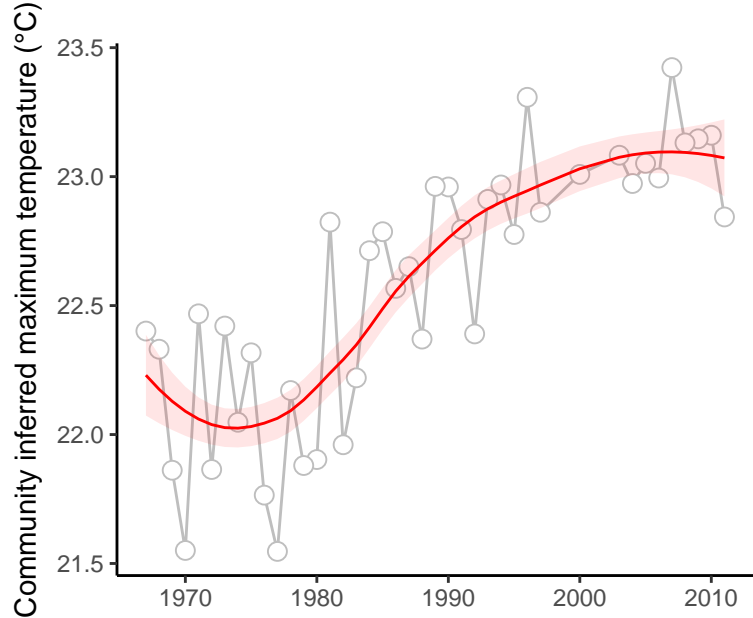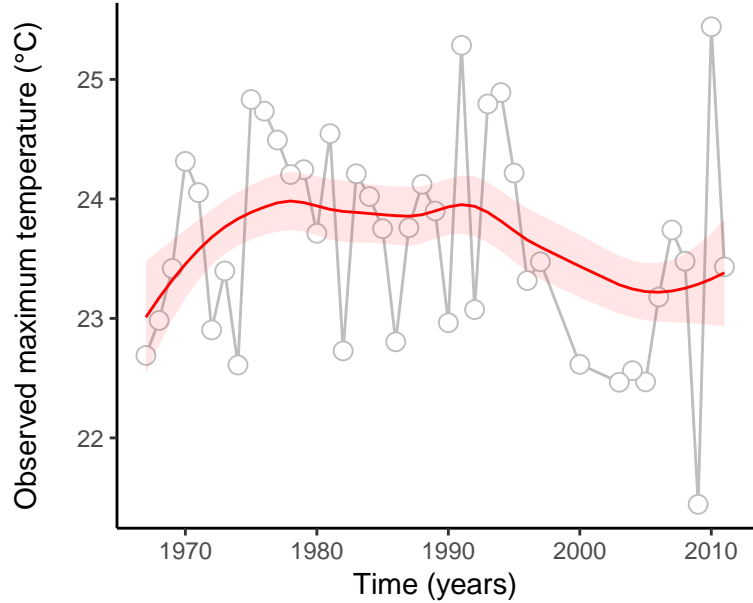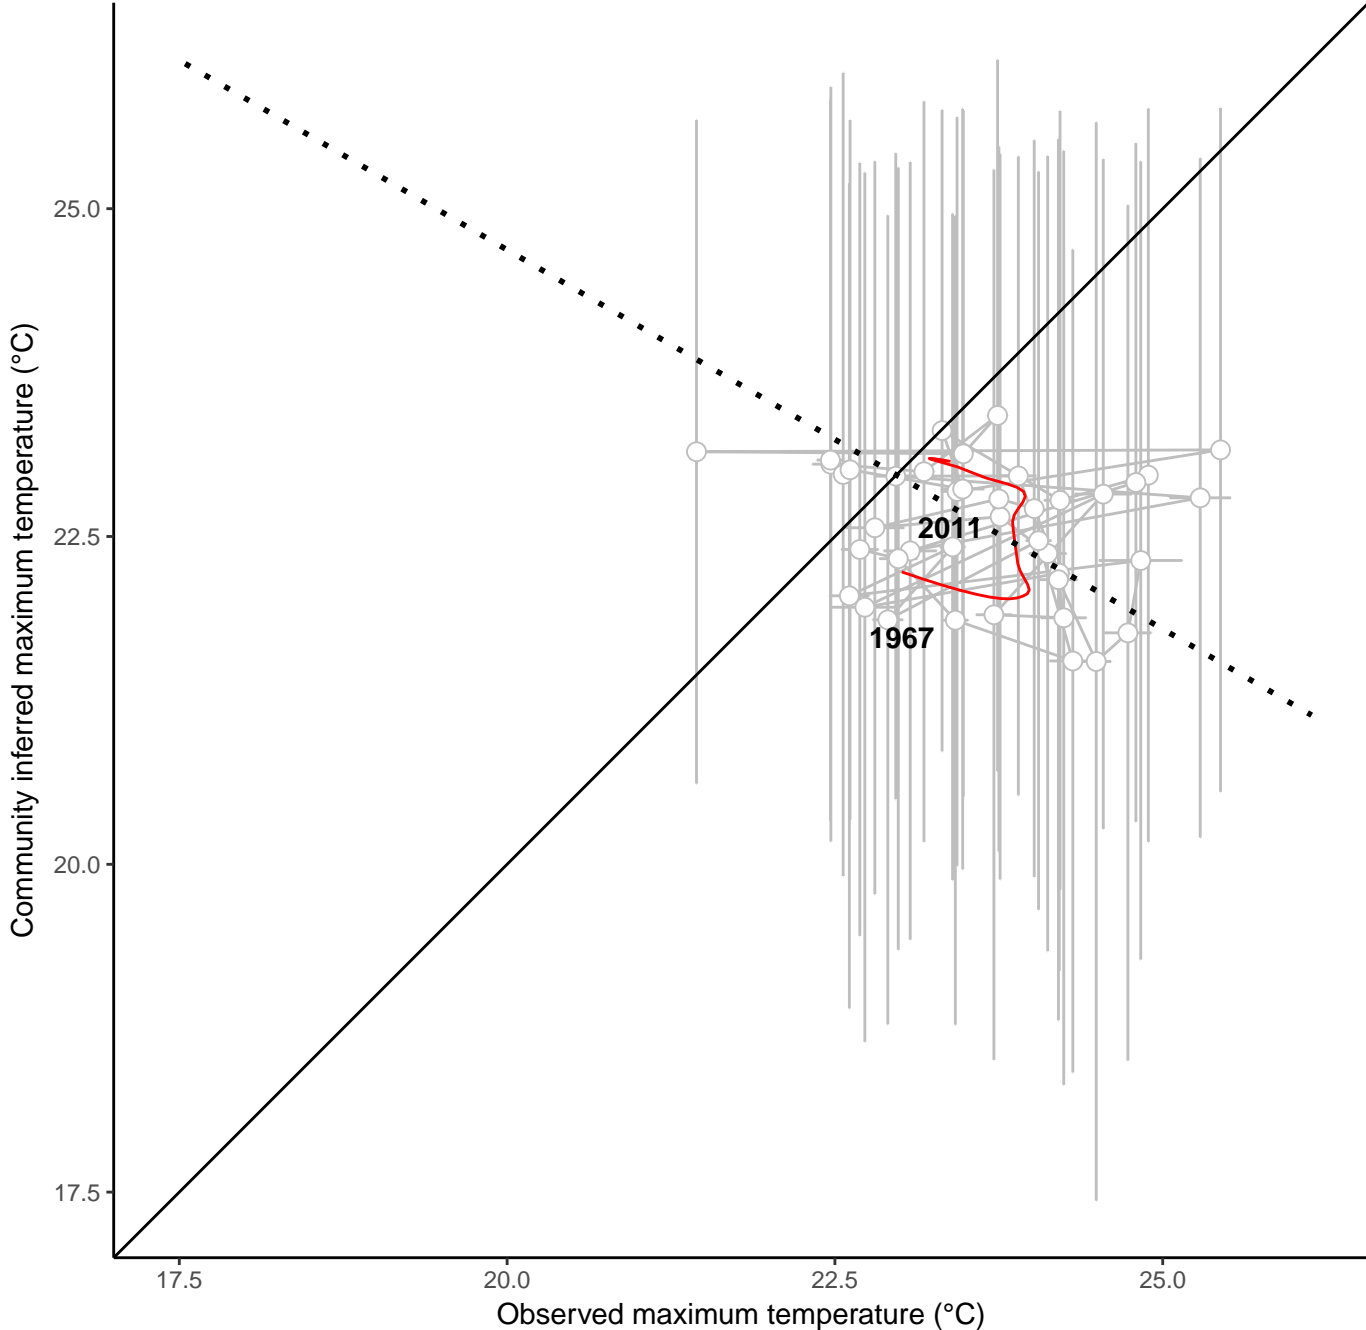

site : 840\_54\_12

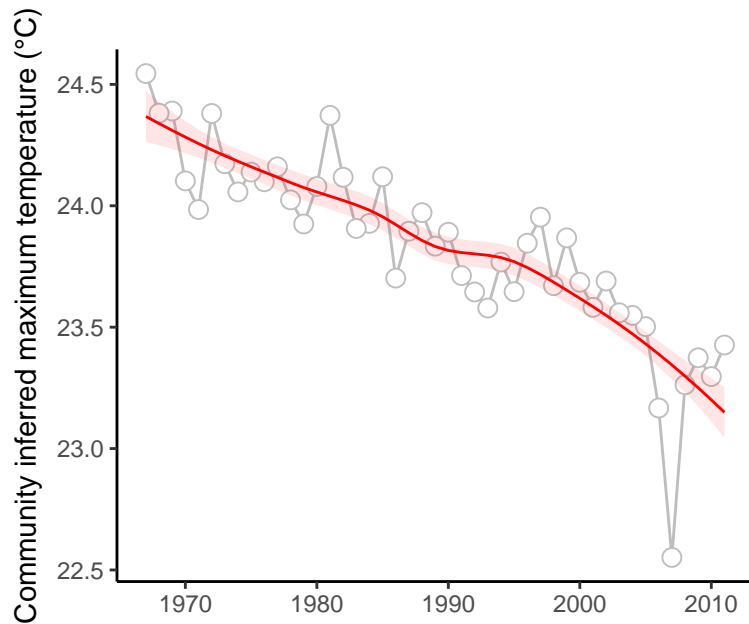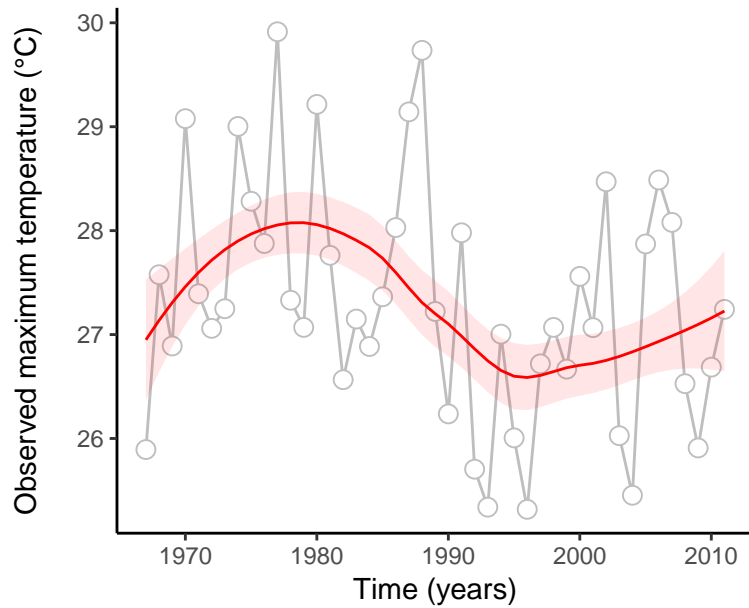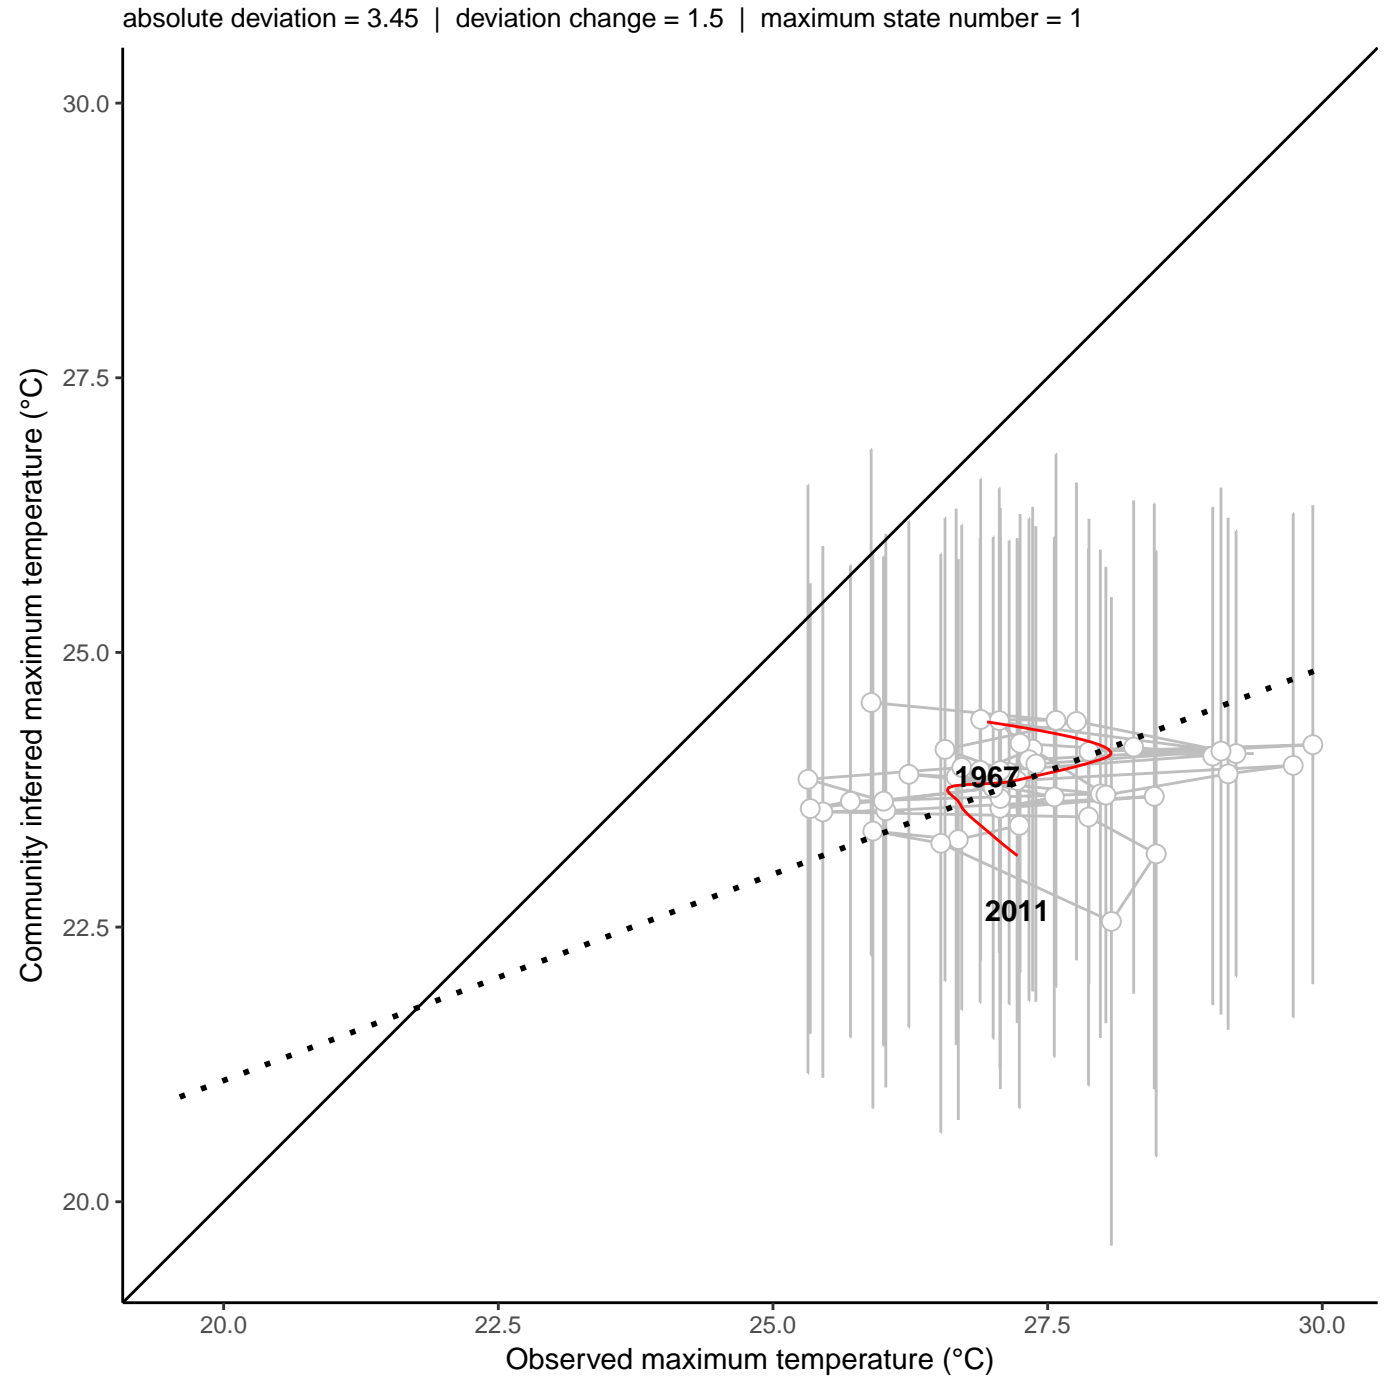

site : 840\_58\_9

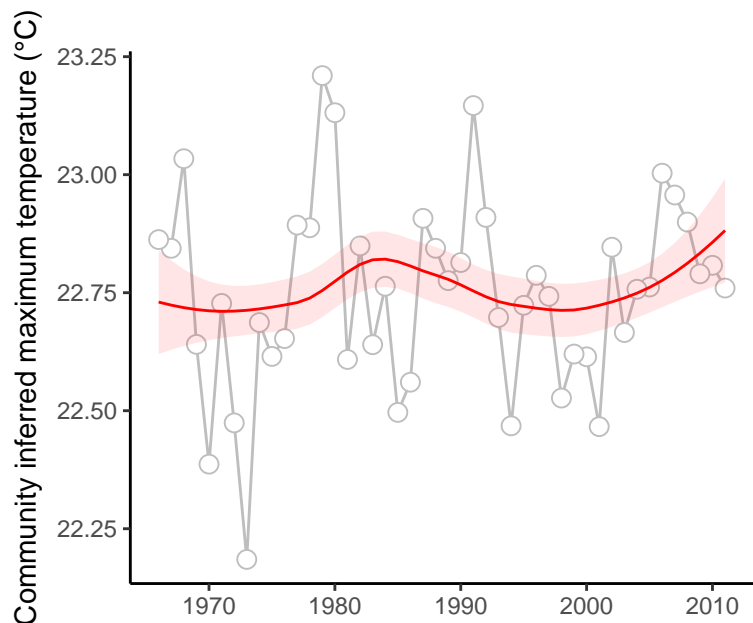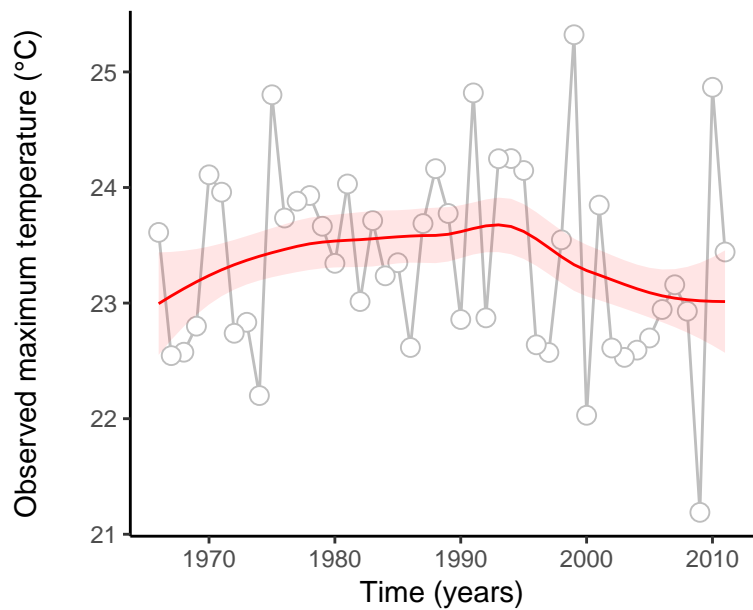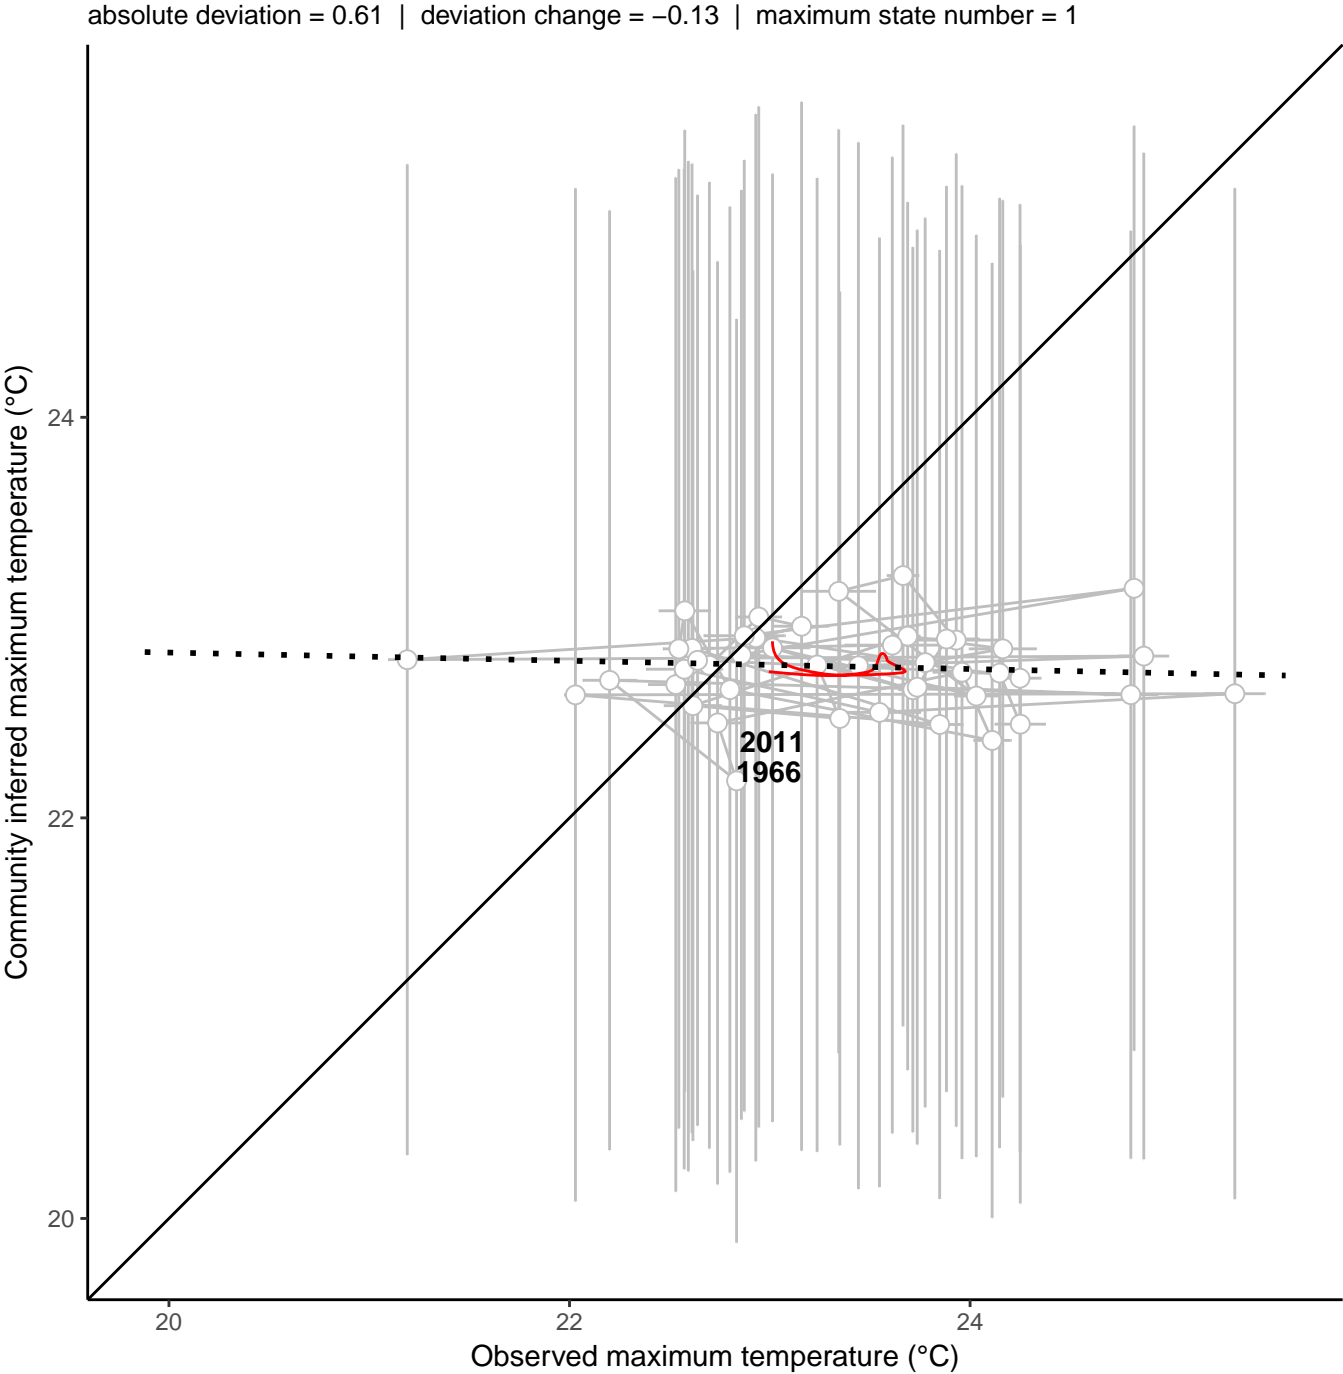

site : 840\_64\_17

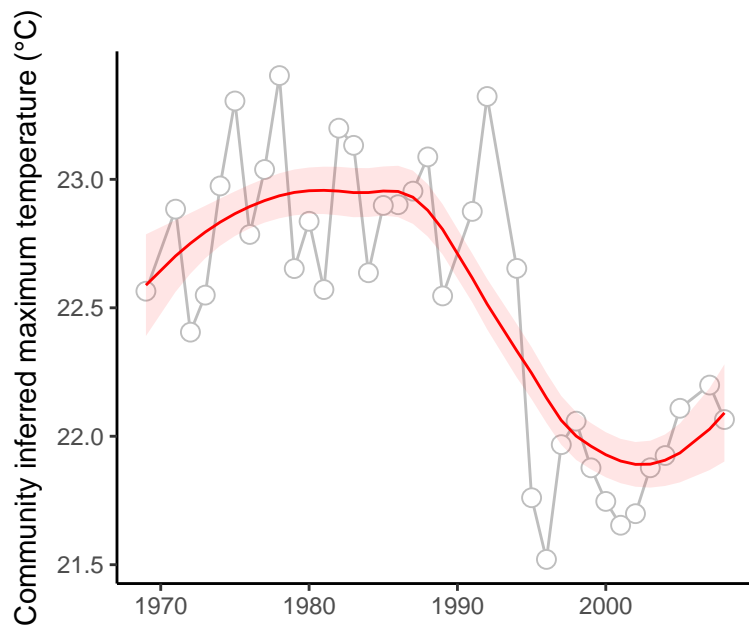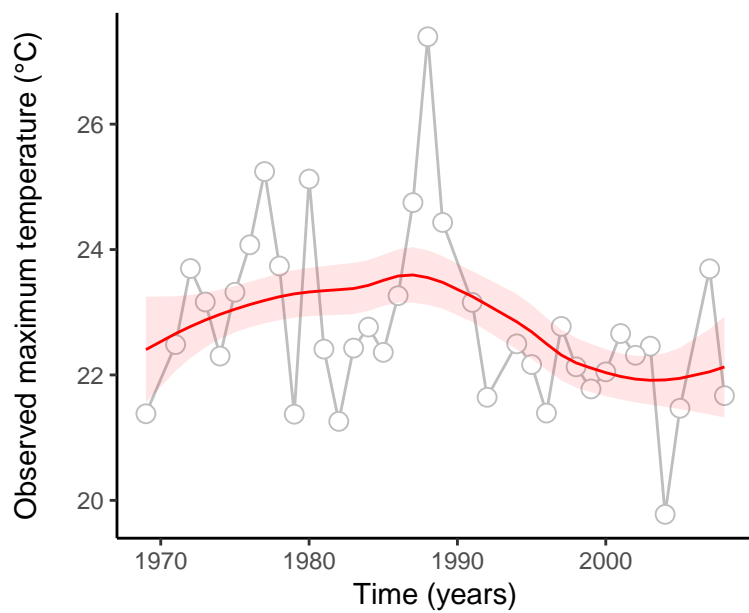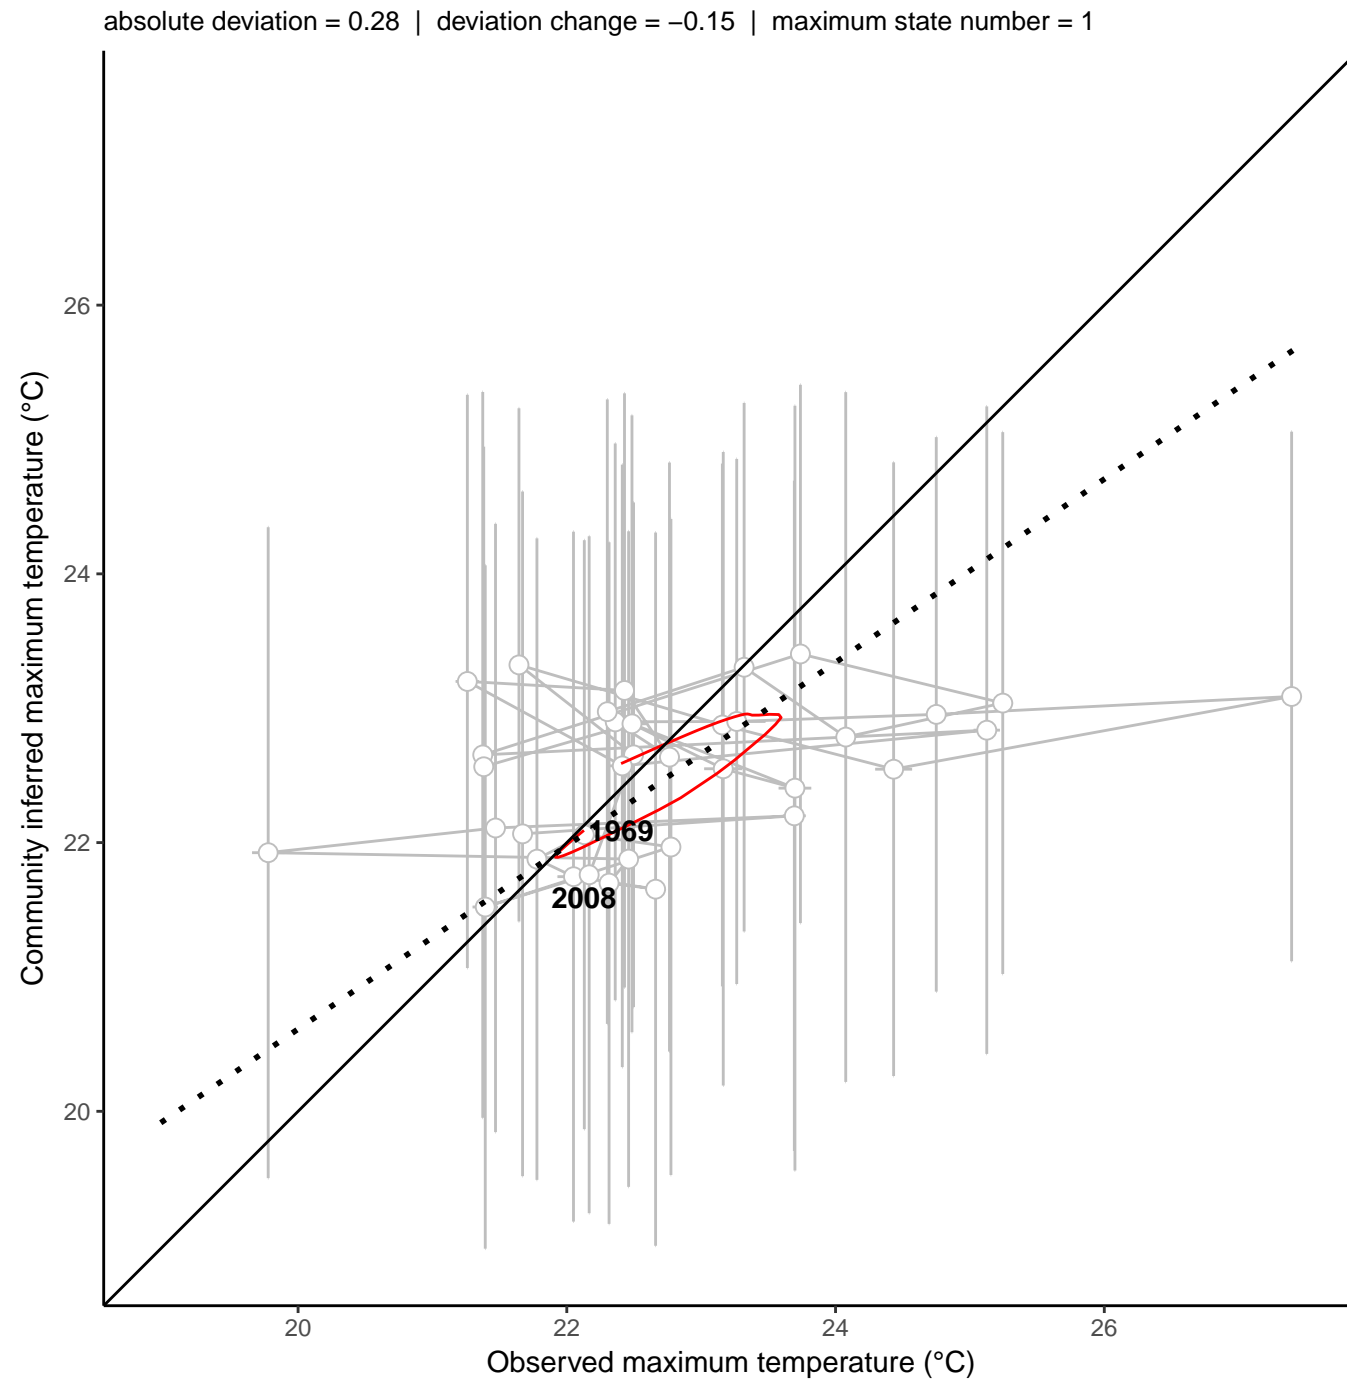

site : 840\_7\_2

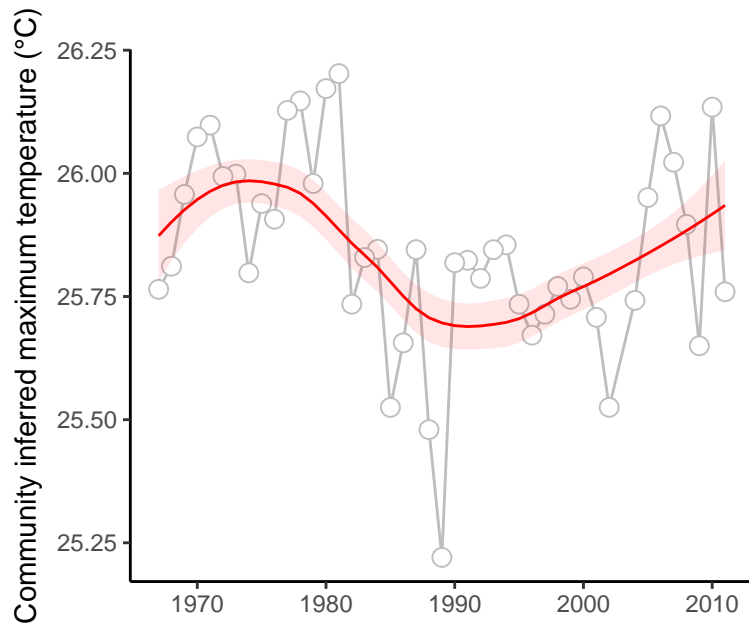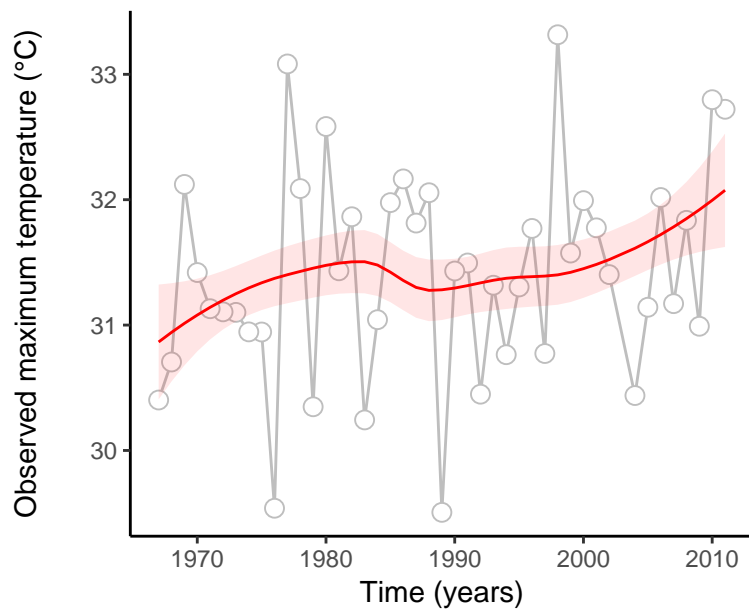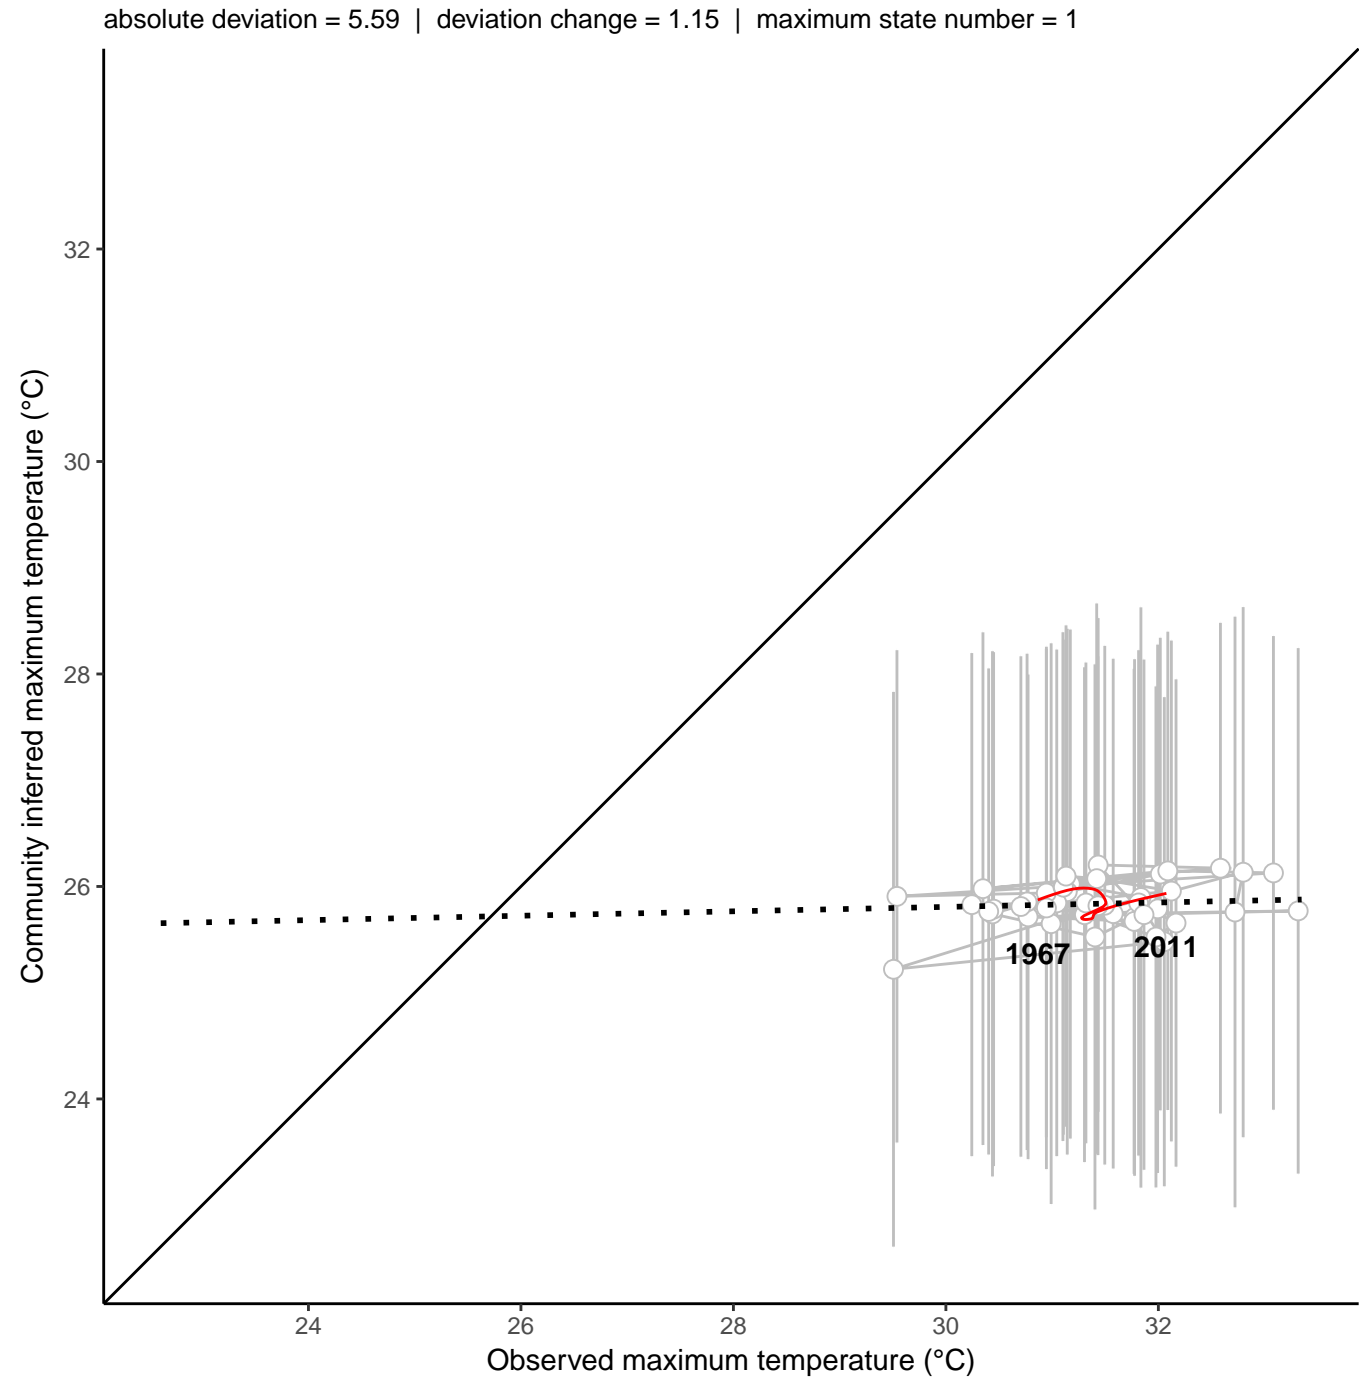



site : 840\_72\_70

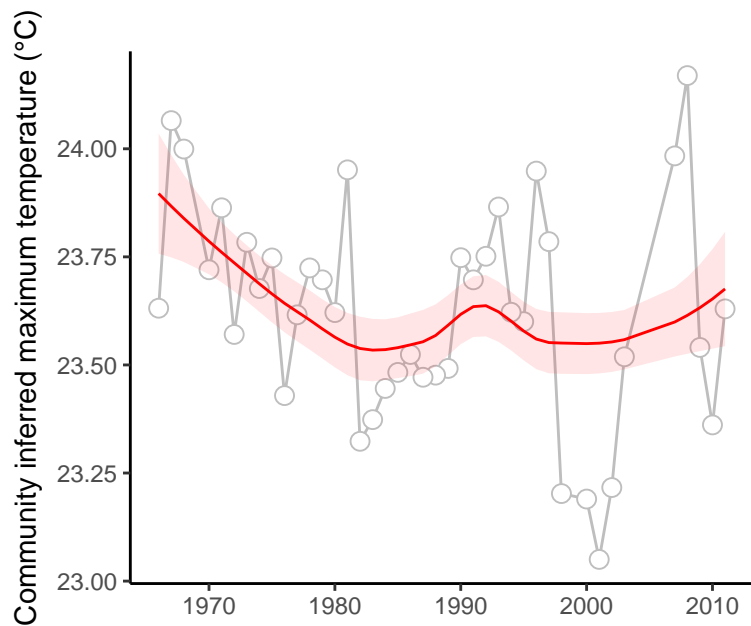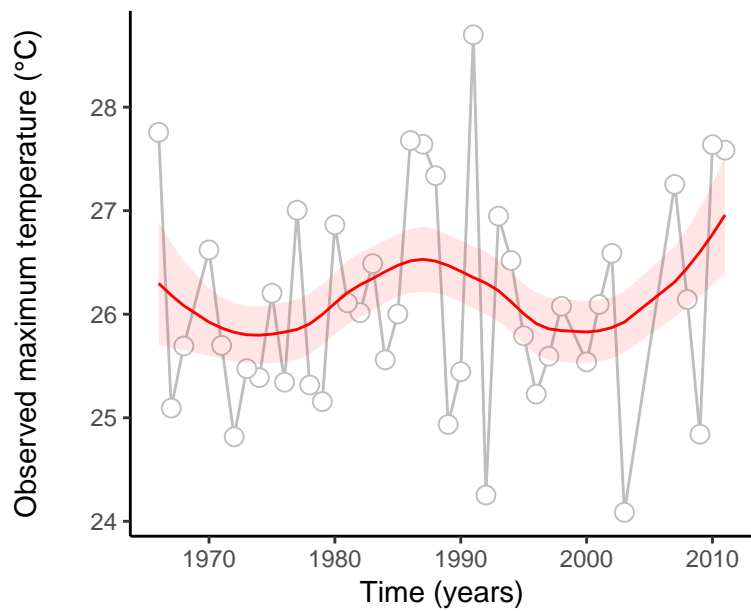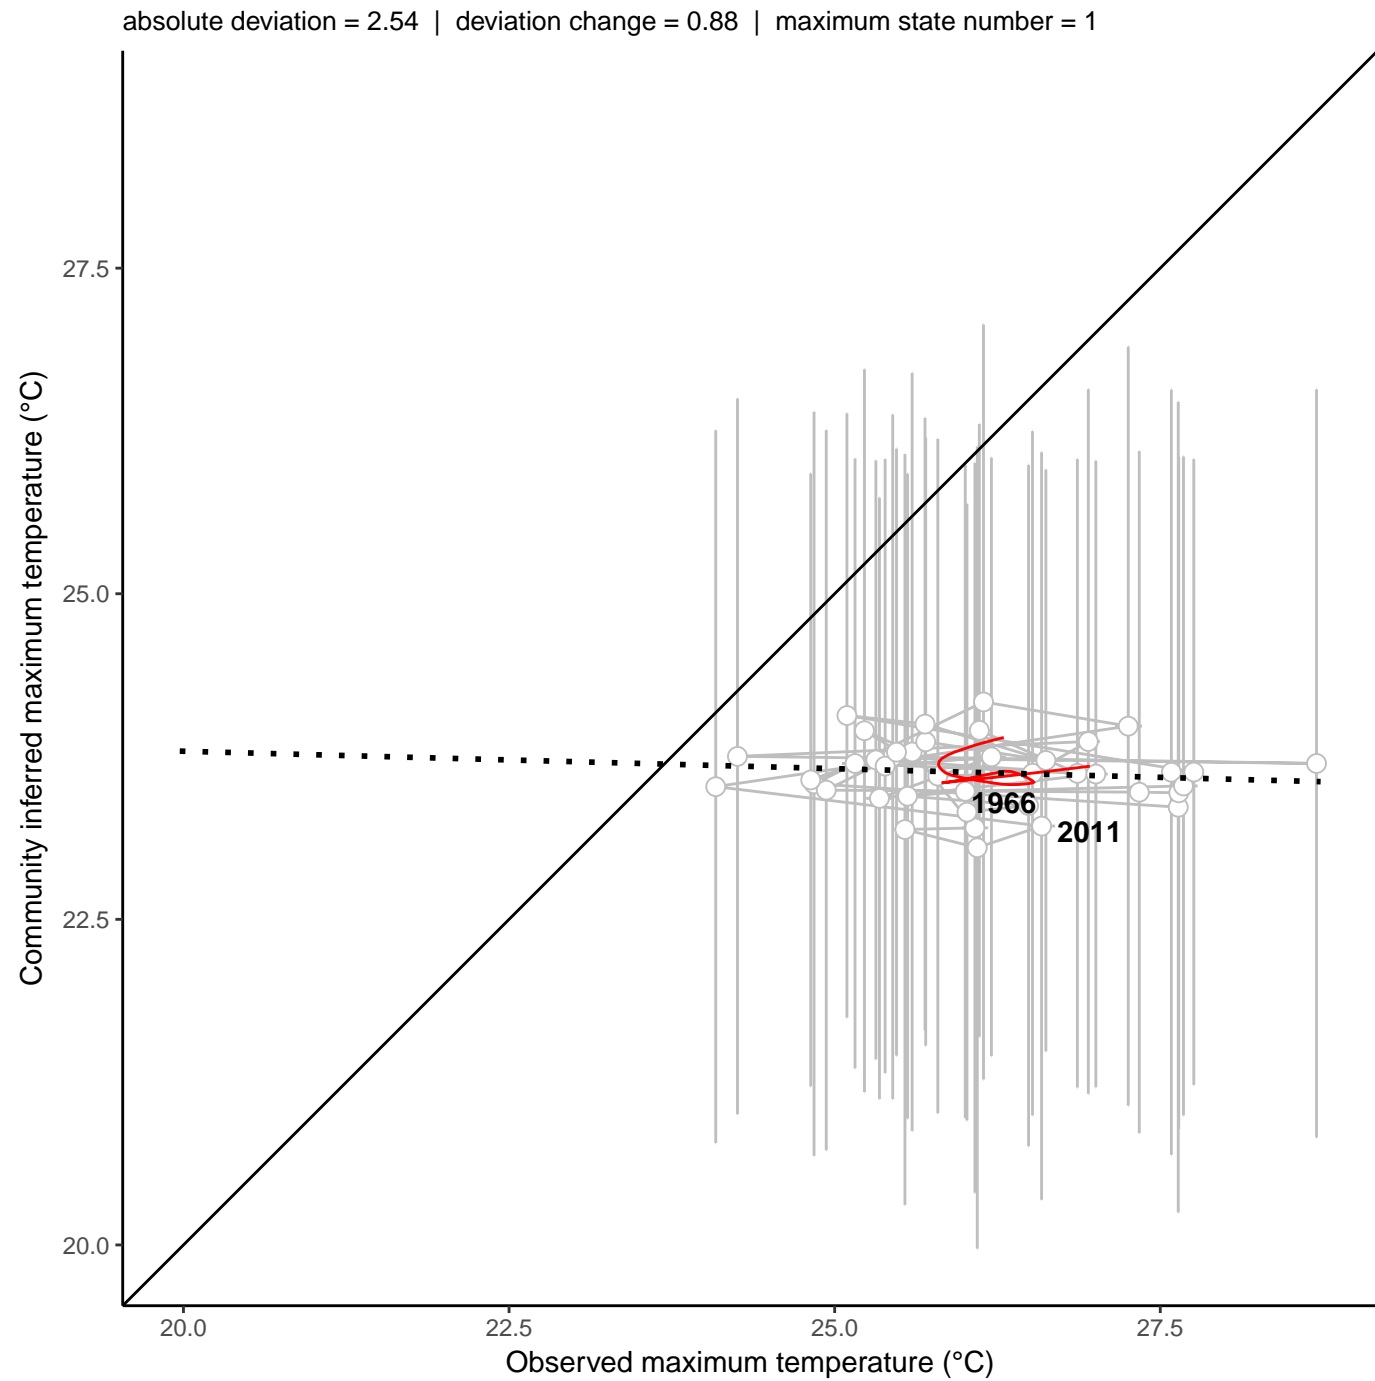

site : 840\_82\_21

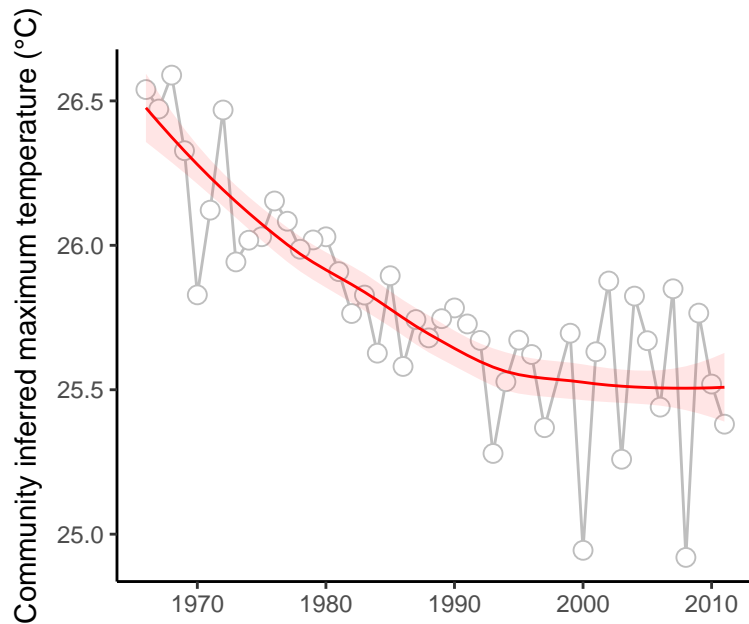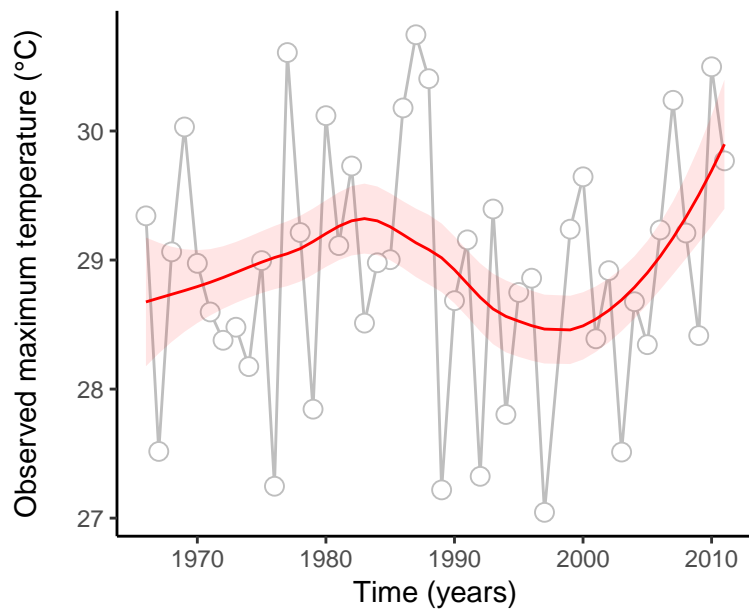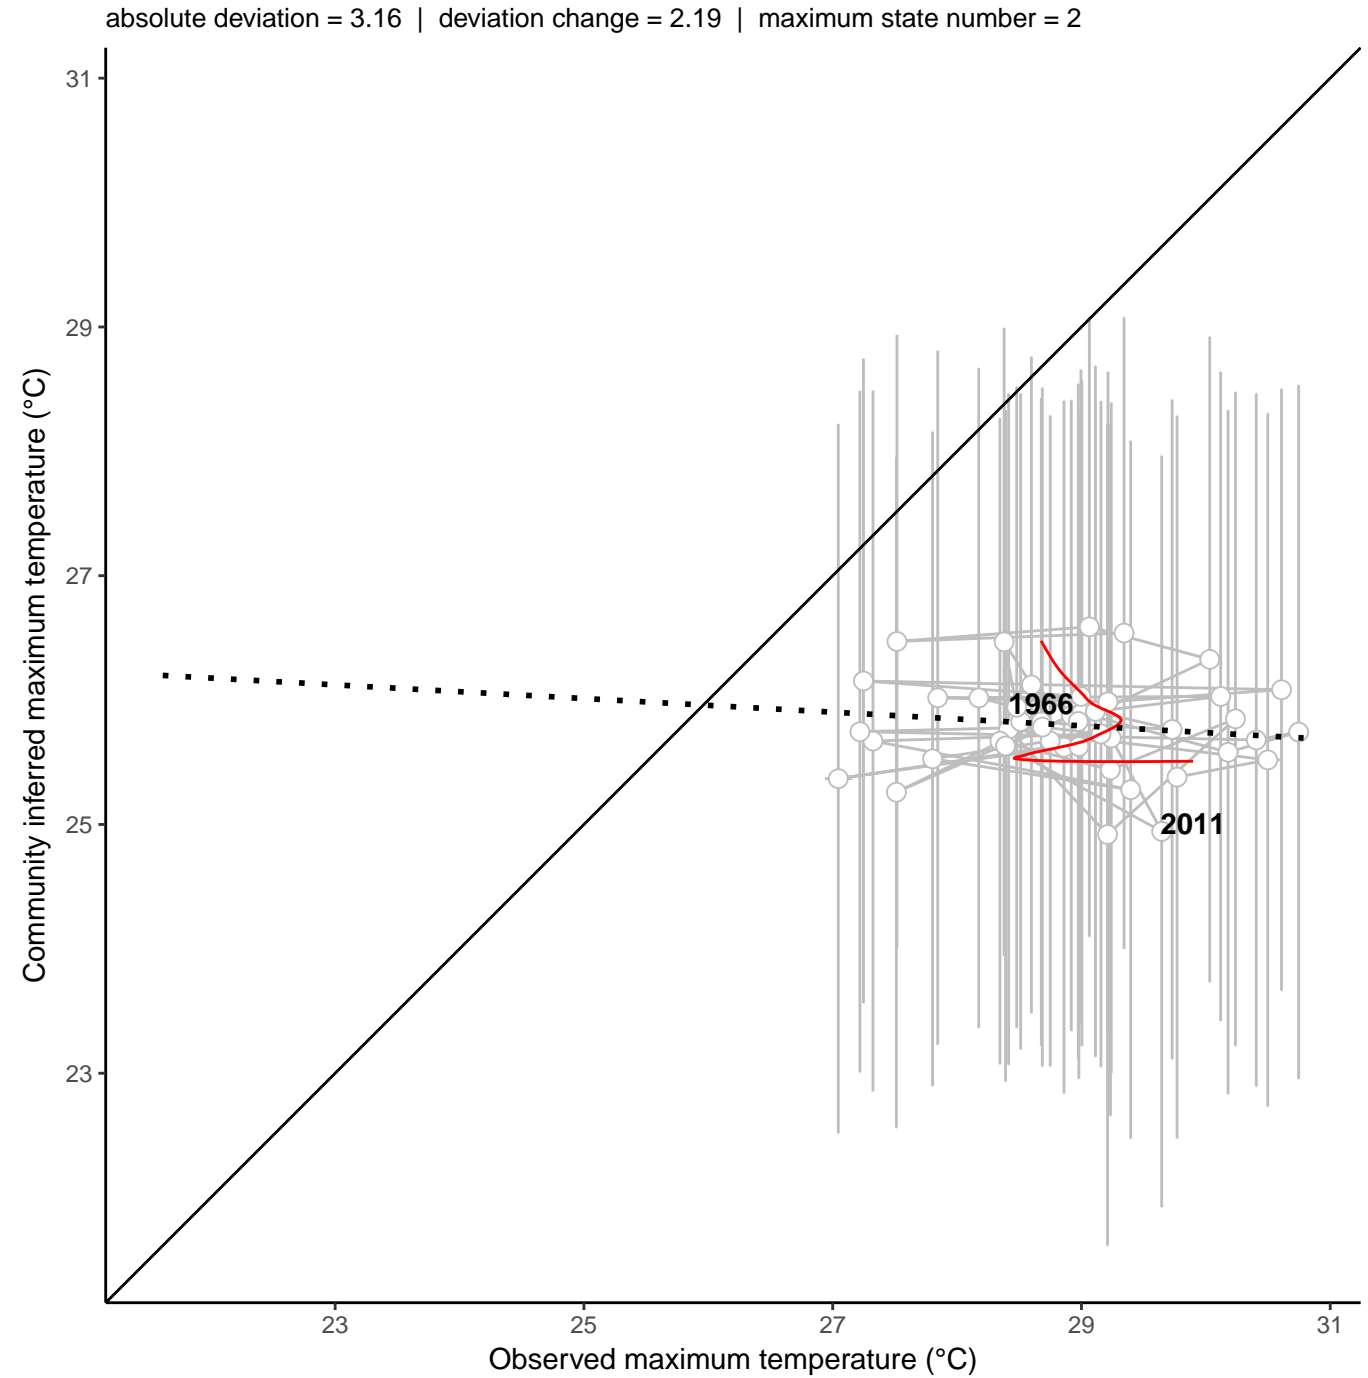

site : 840\_82\_6

absolute deviation = 3.6 | deviation change = 1.07 | maximum state number = 1

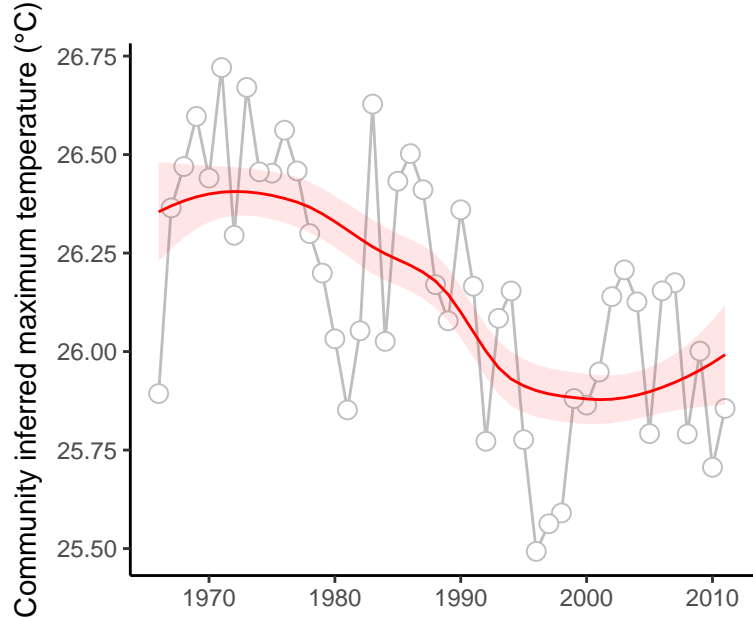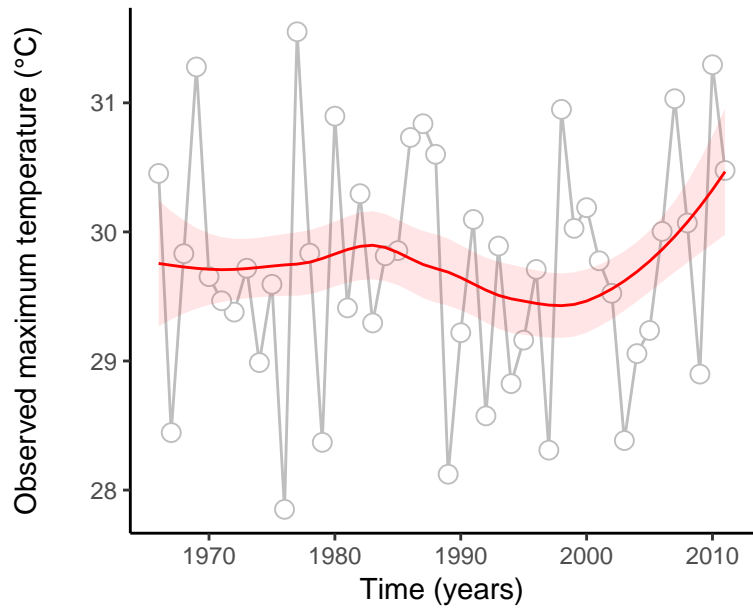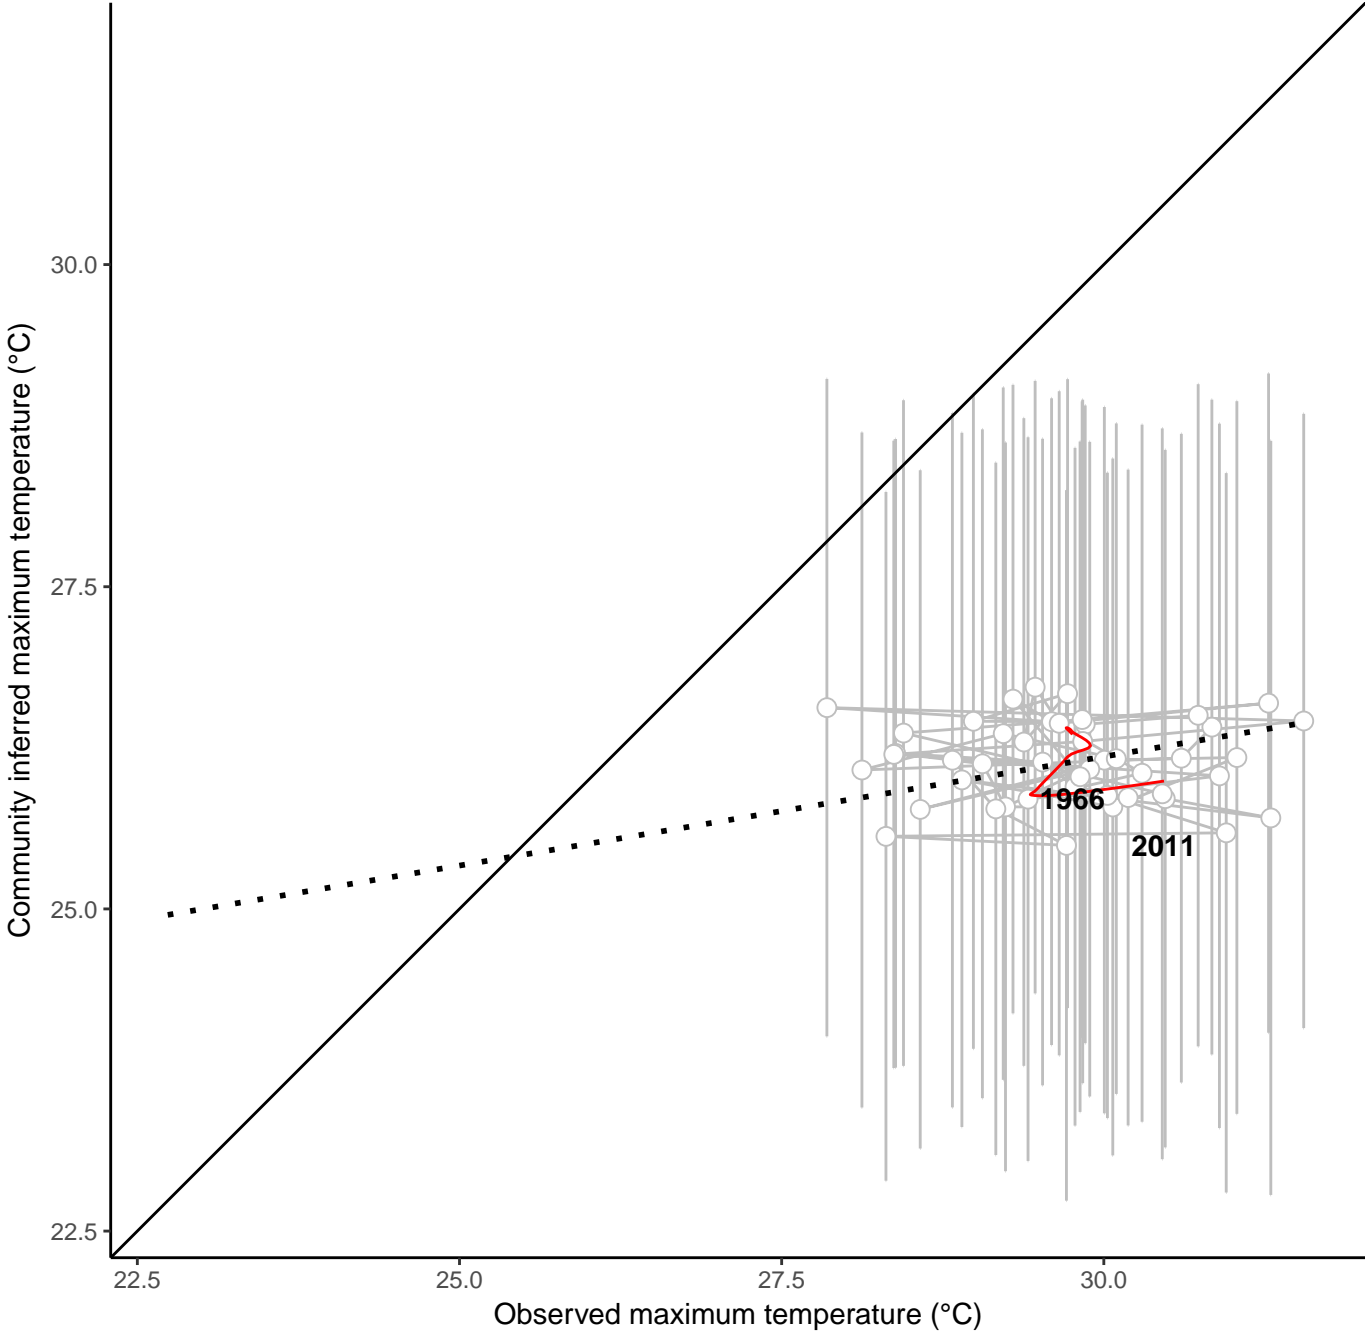

site : 840\_90\_31

absolute deviation = 0.08 | deviation change = 0.33 | maximum state number = 1

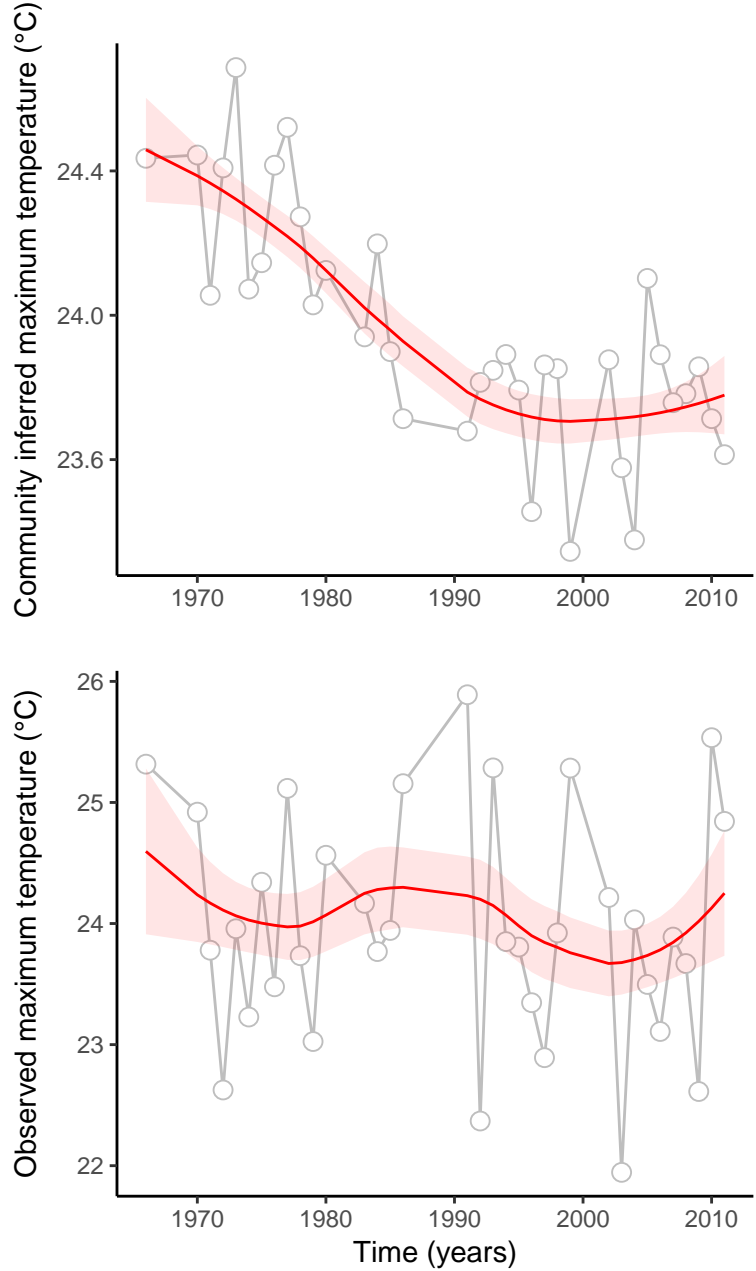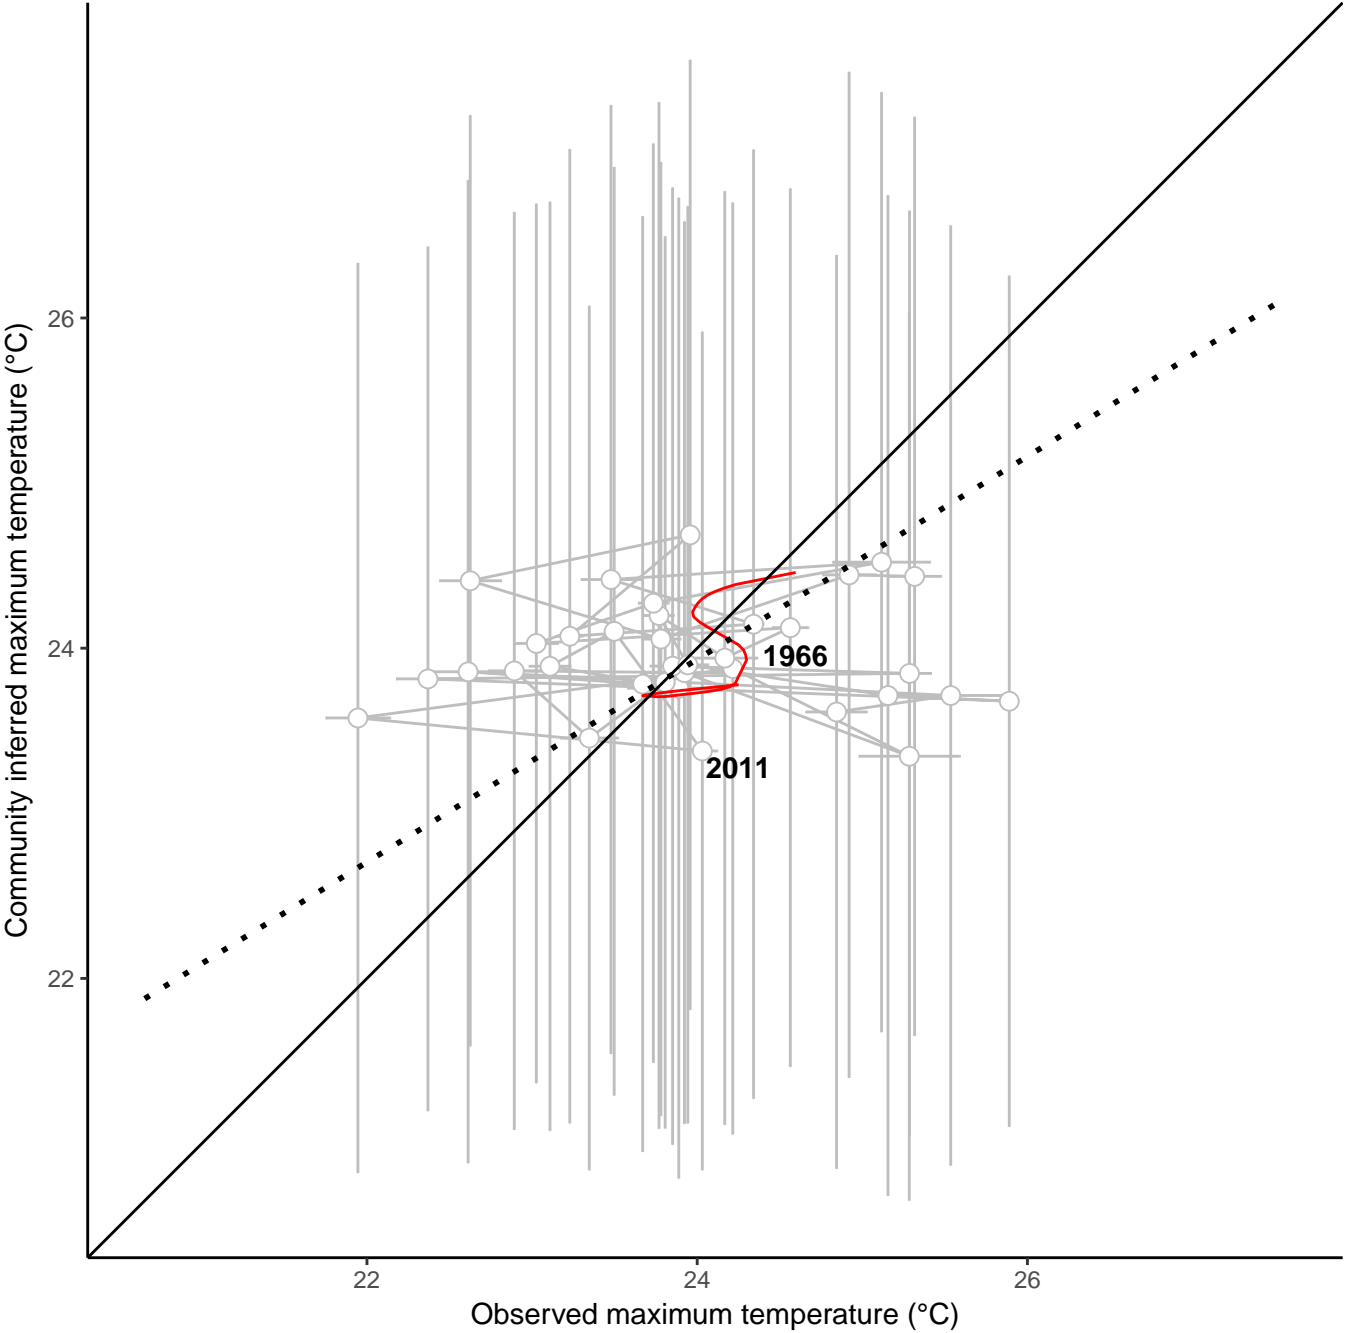

site : 840\_91\_33

absolute deviation = 1.65 | deviation change = 1.3 | maximum state number = 2

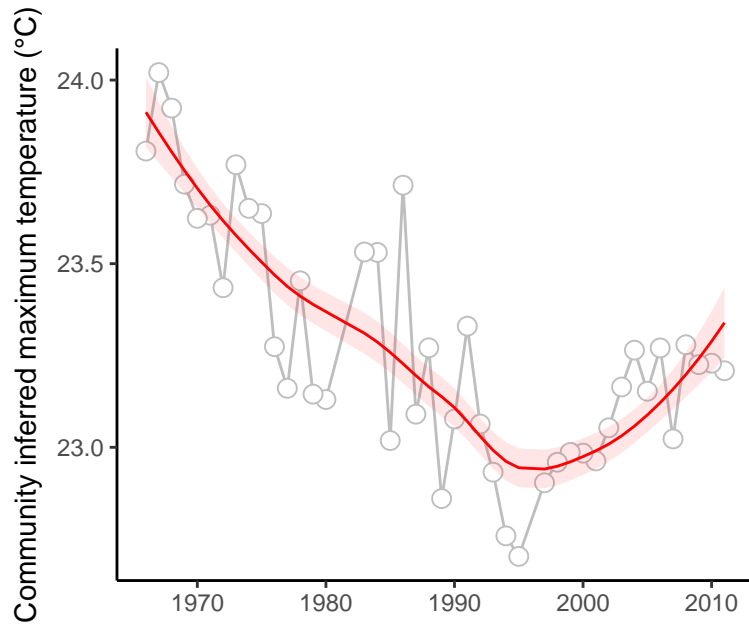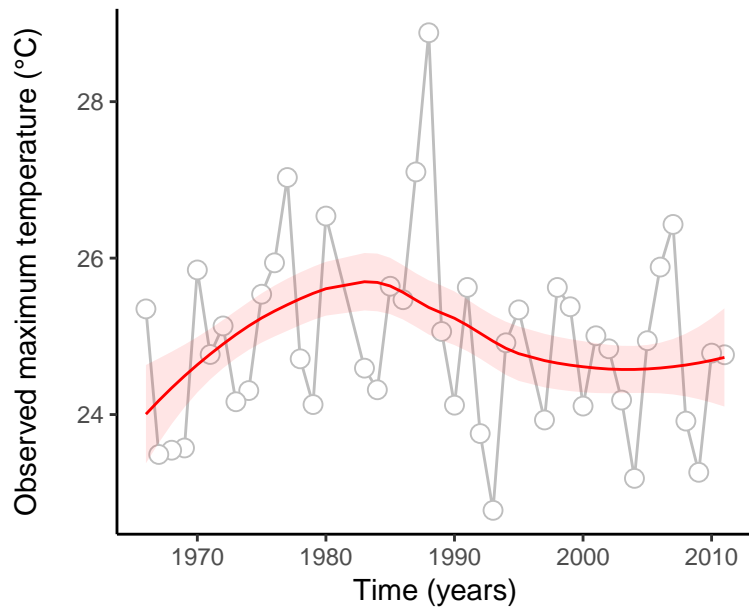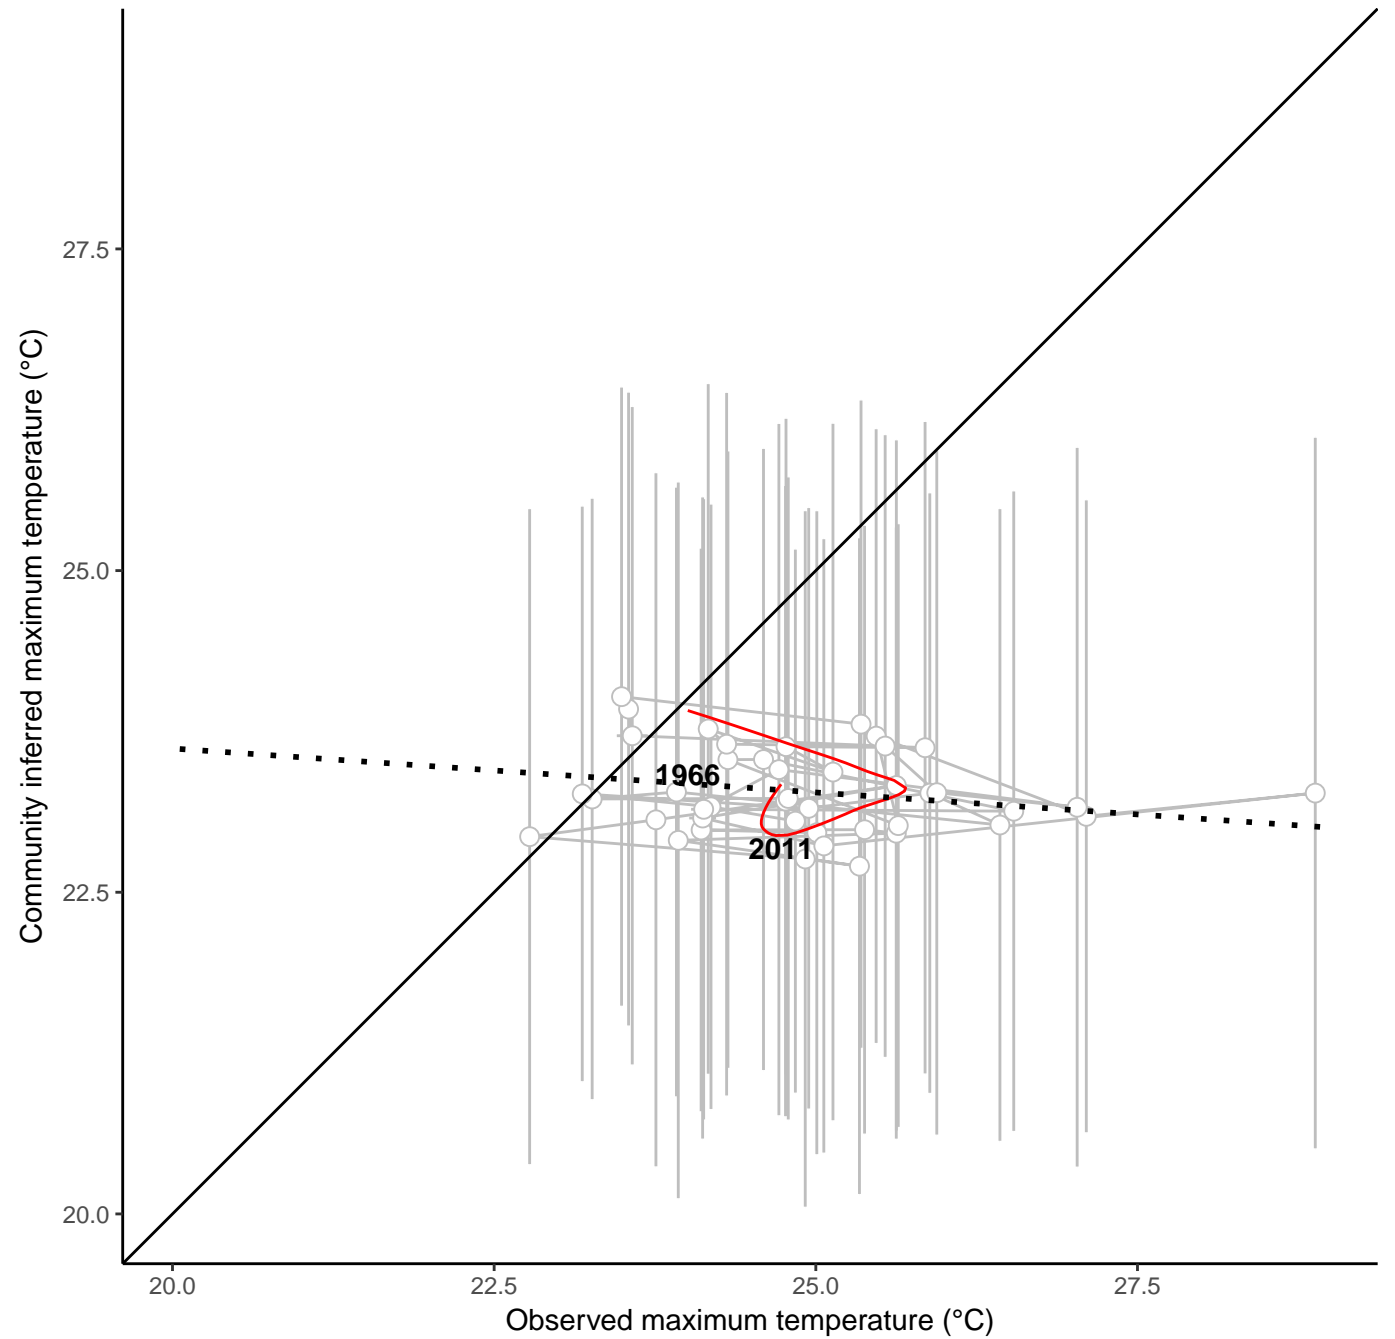

site : 840\_18\_10

absolute deviation = 1.59 | deviation change = 0.98 | maximum state number = 1

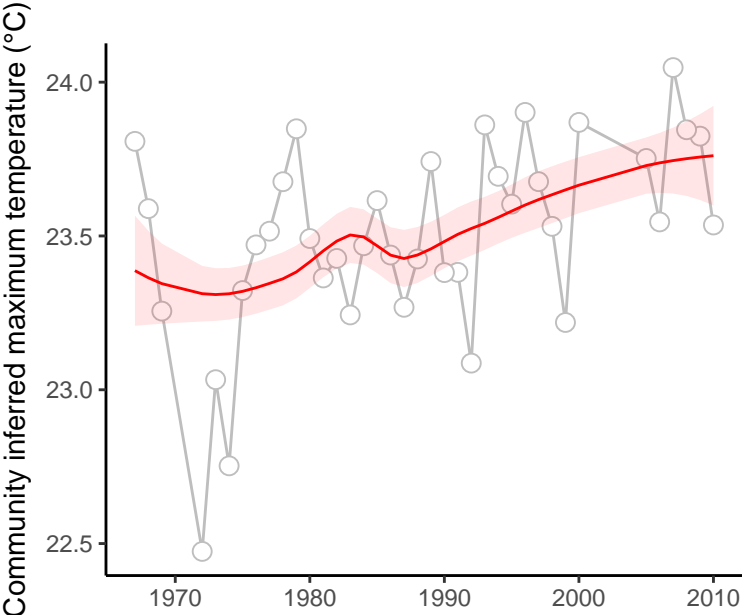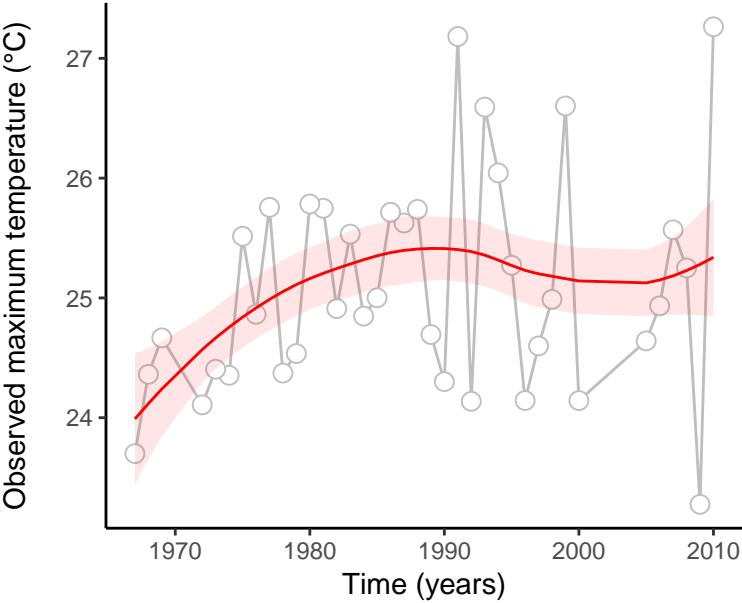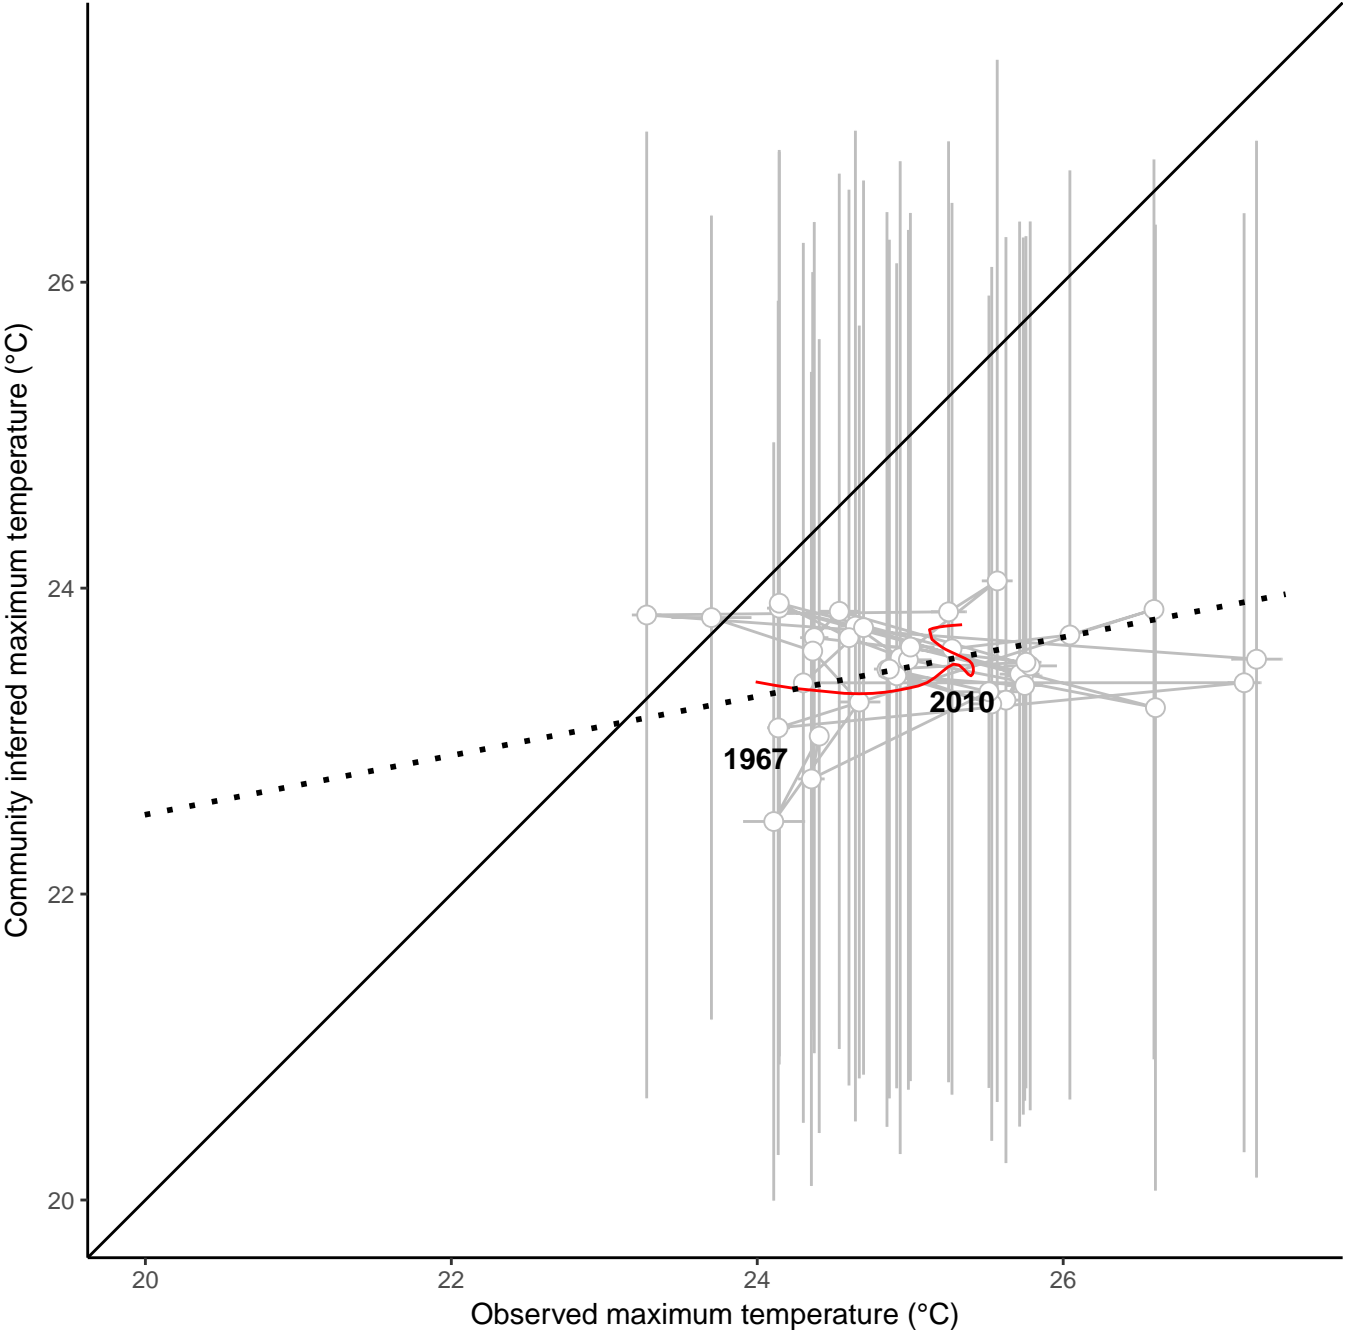

site : 840\_2\_24

absolute deviation = 4.79 | deviation change = 0.81 | maximum state number = 1

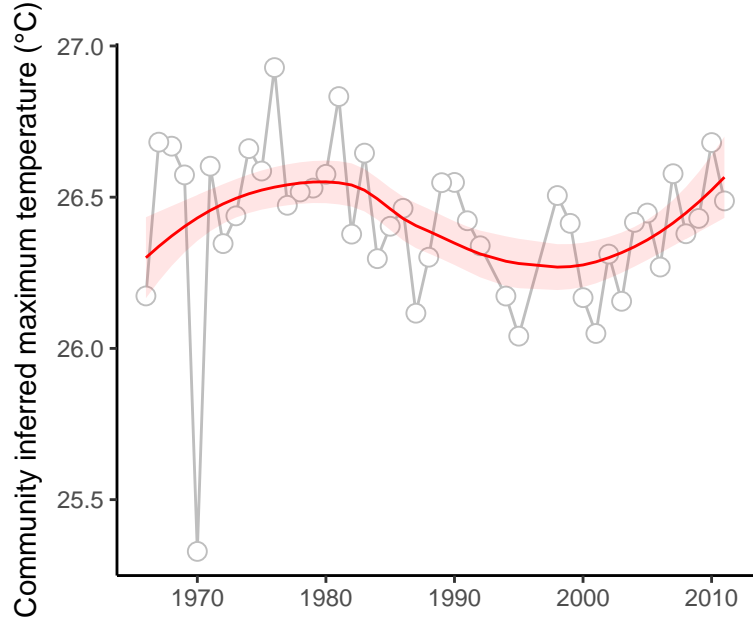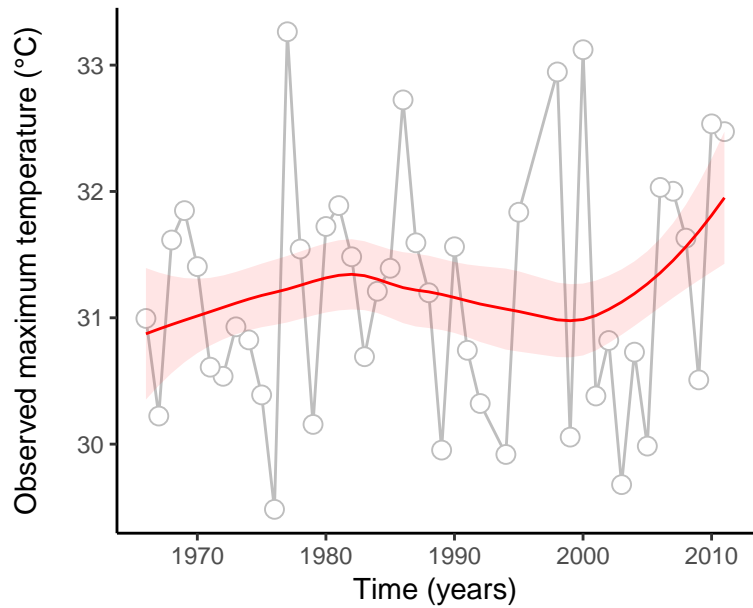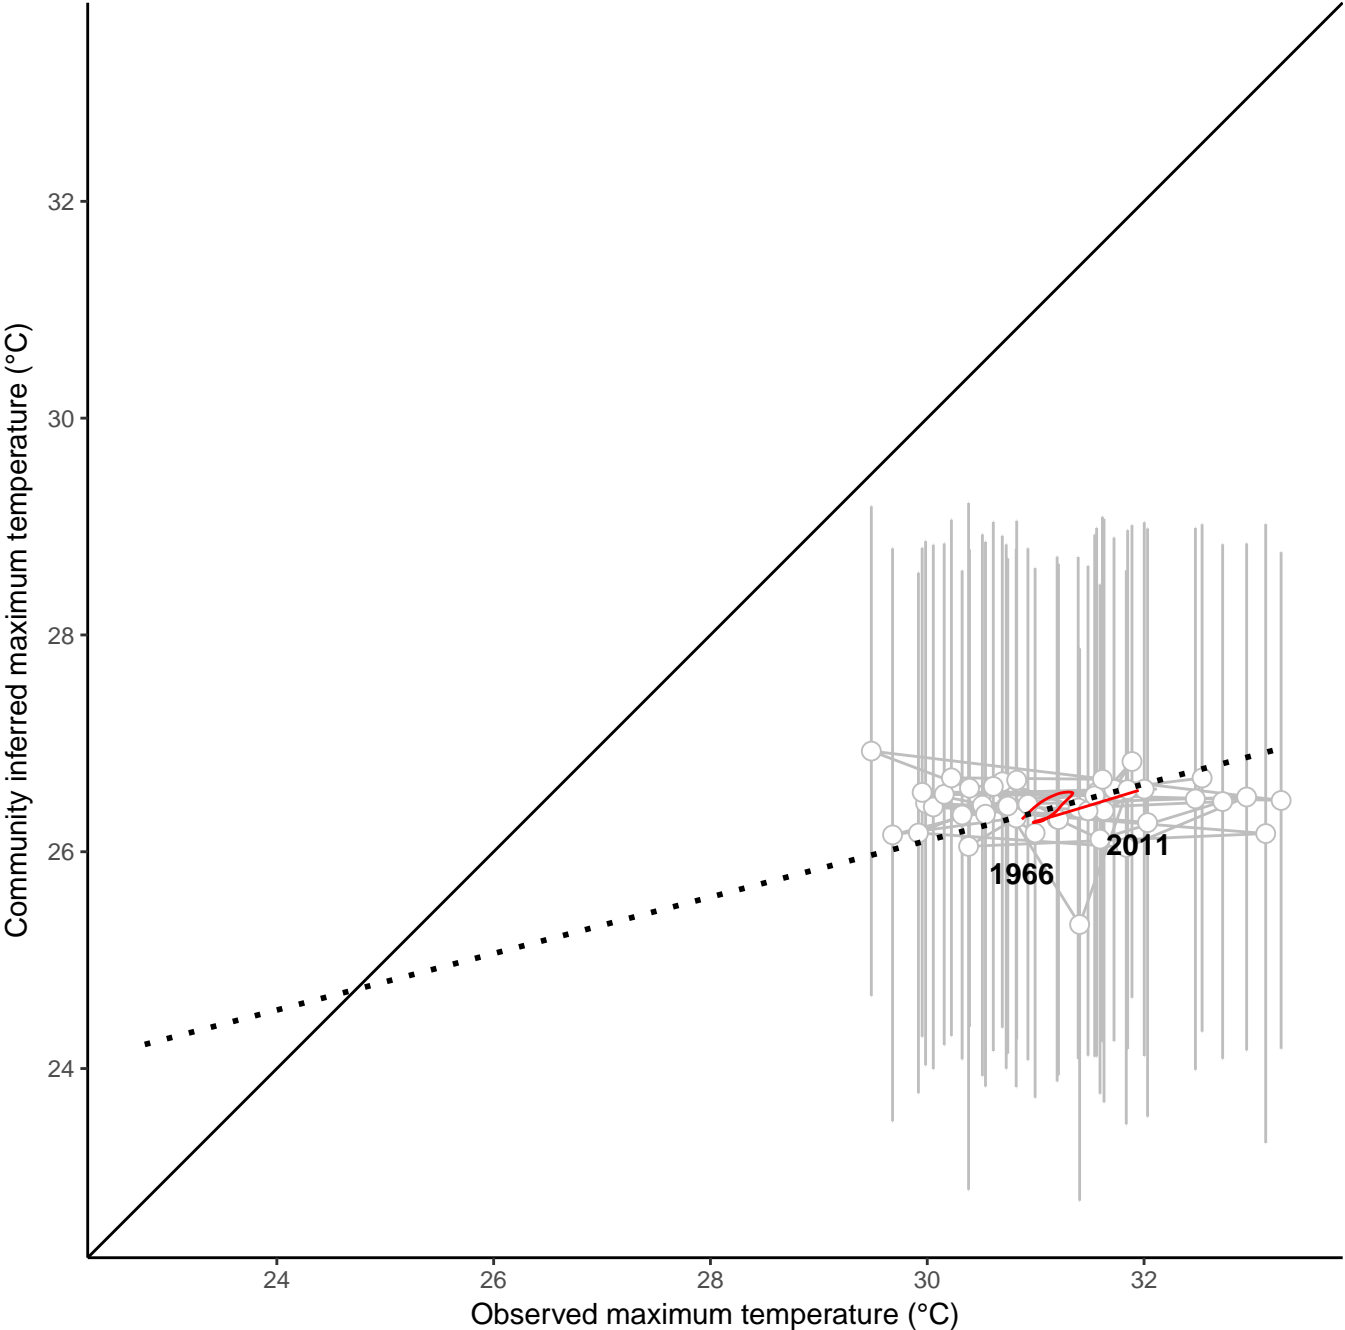

site : 840\_34\_19

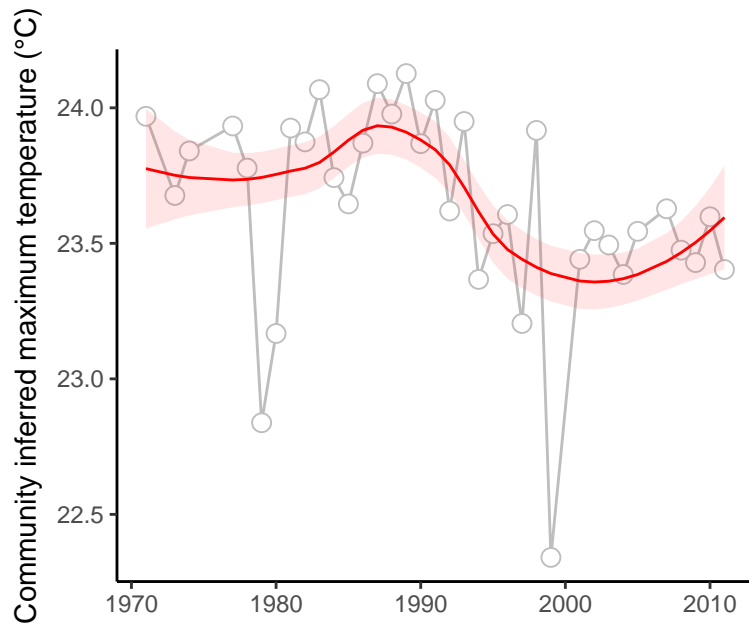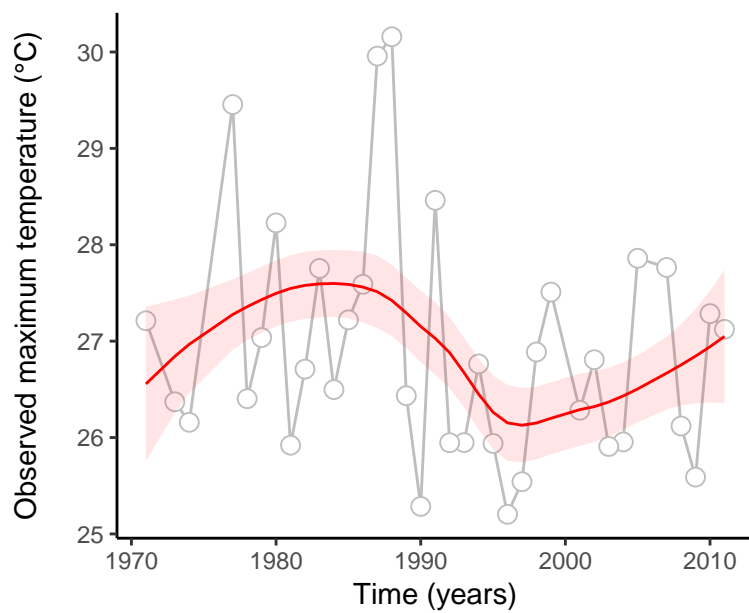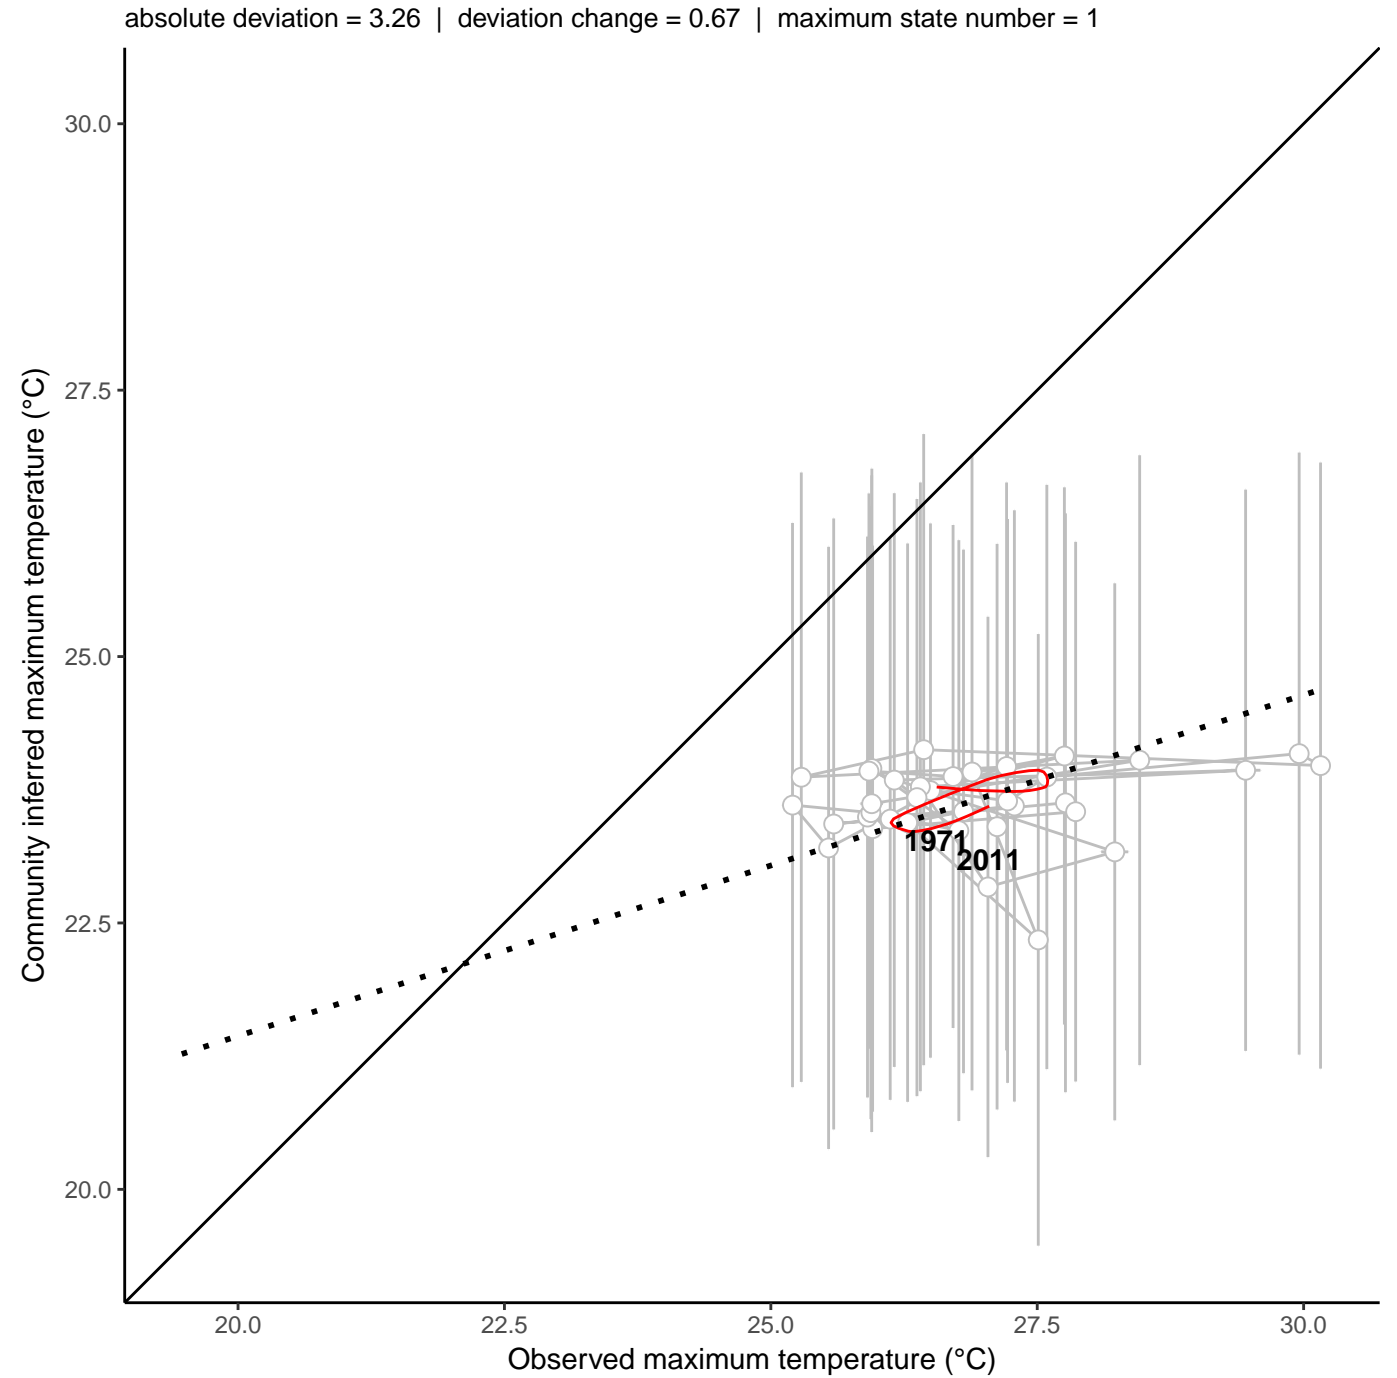



site : 840\_34\_26

absolute deviation = 3.08 | deviation change = 1.03 | maximum state number = 1

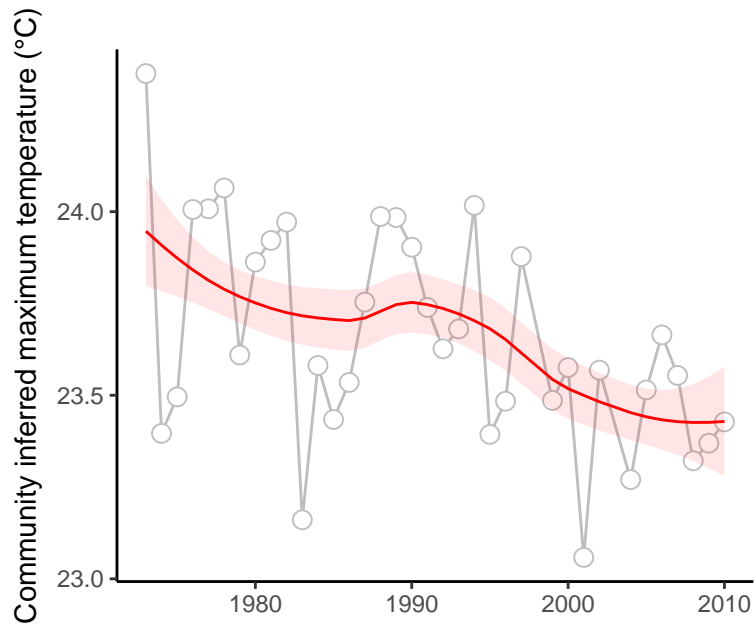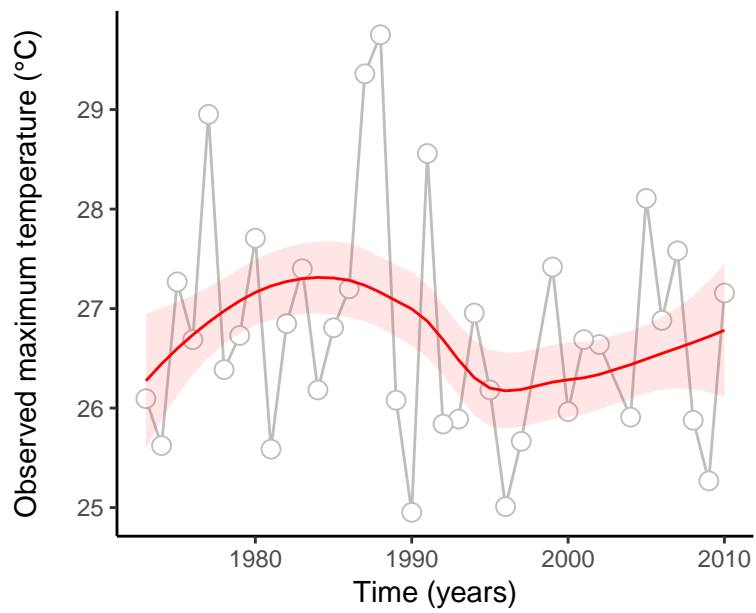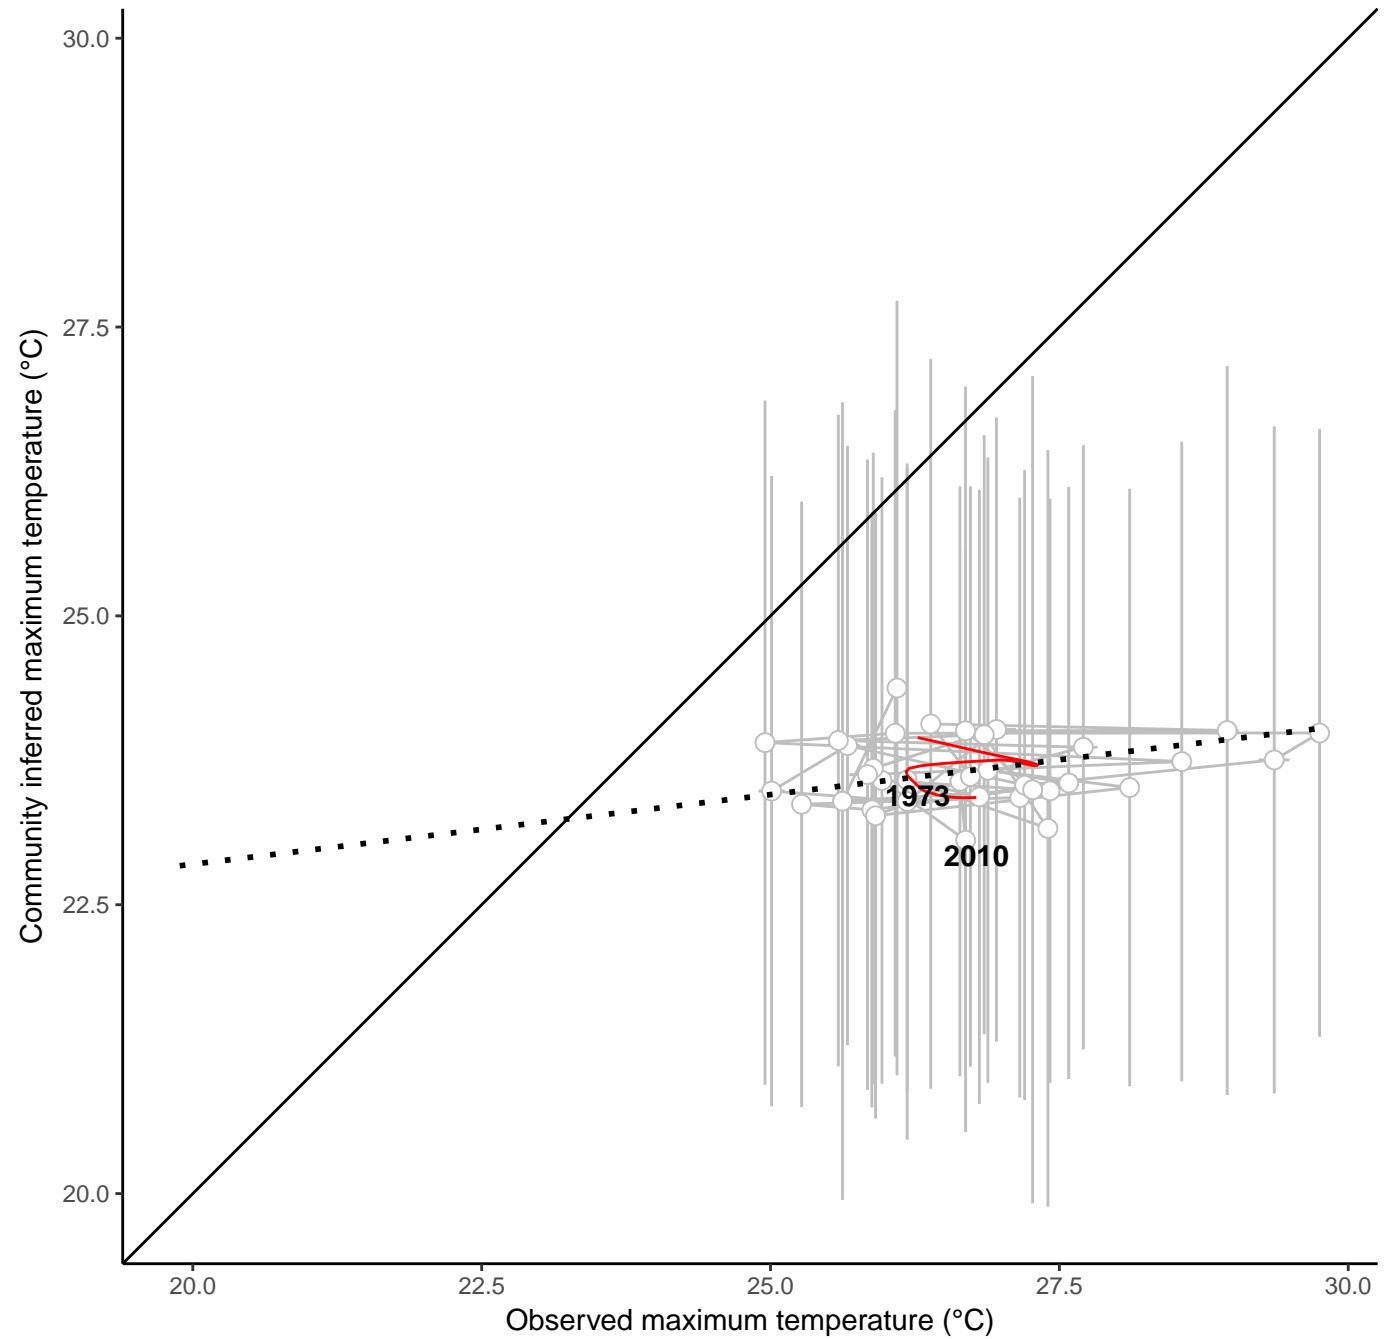

site : 840\_34\_43

absolute deviation = 4.2 | deviation change = 1.07 | maximum state number = 1

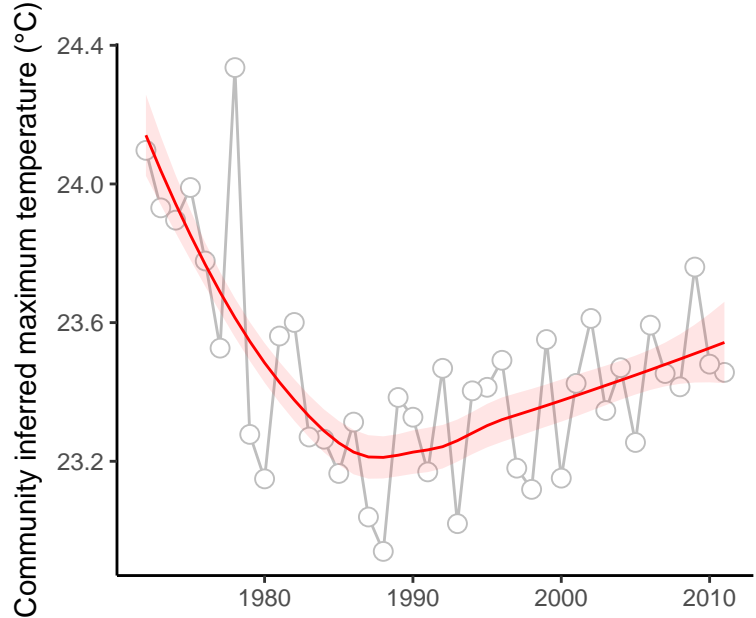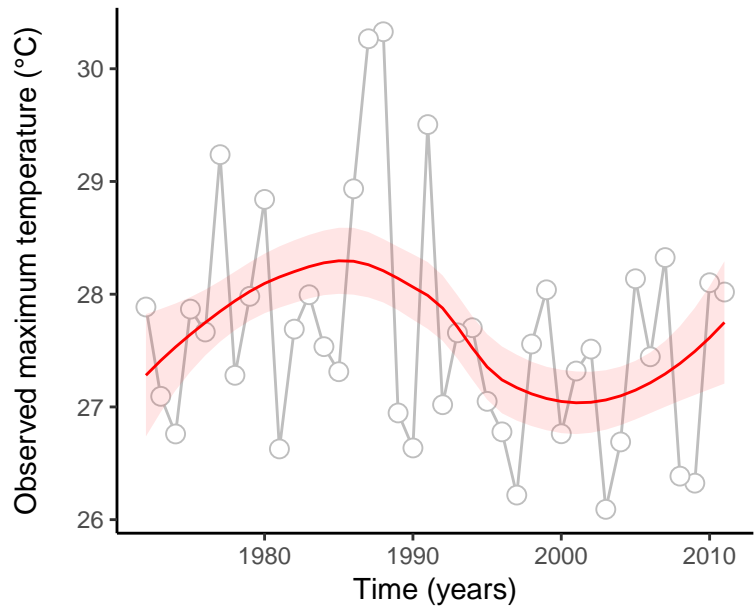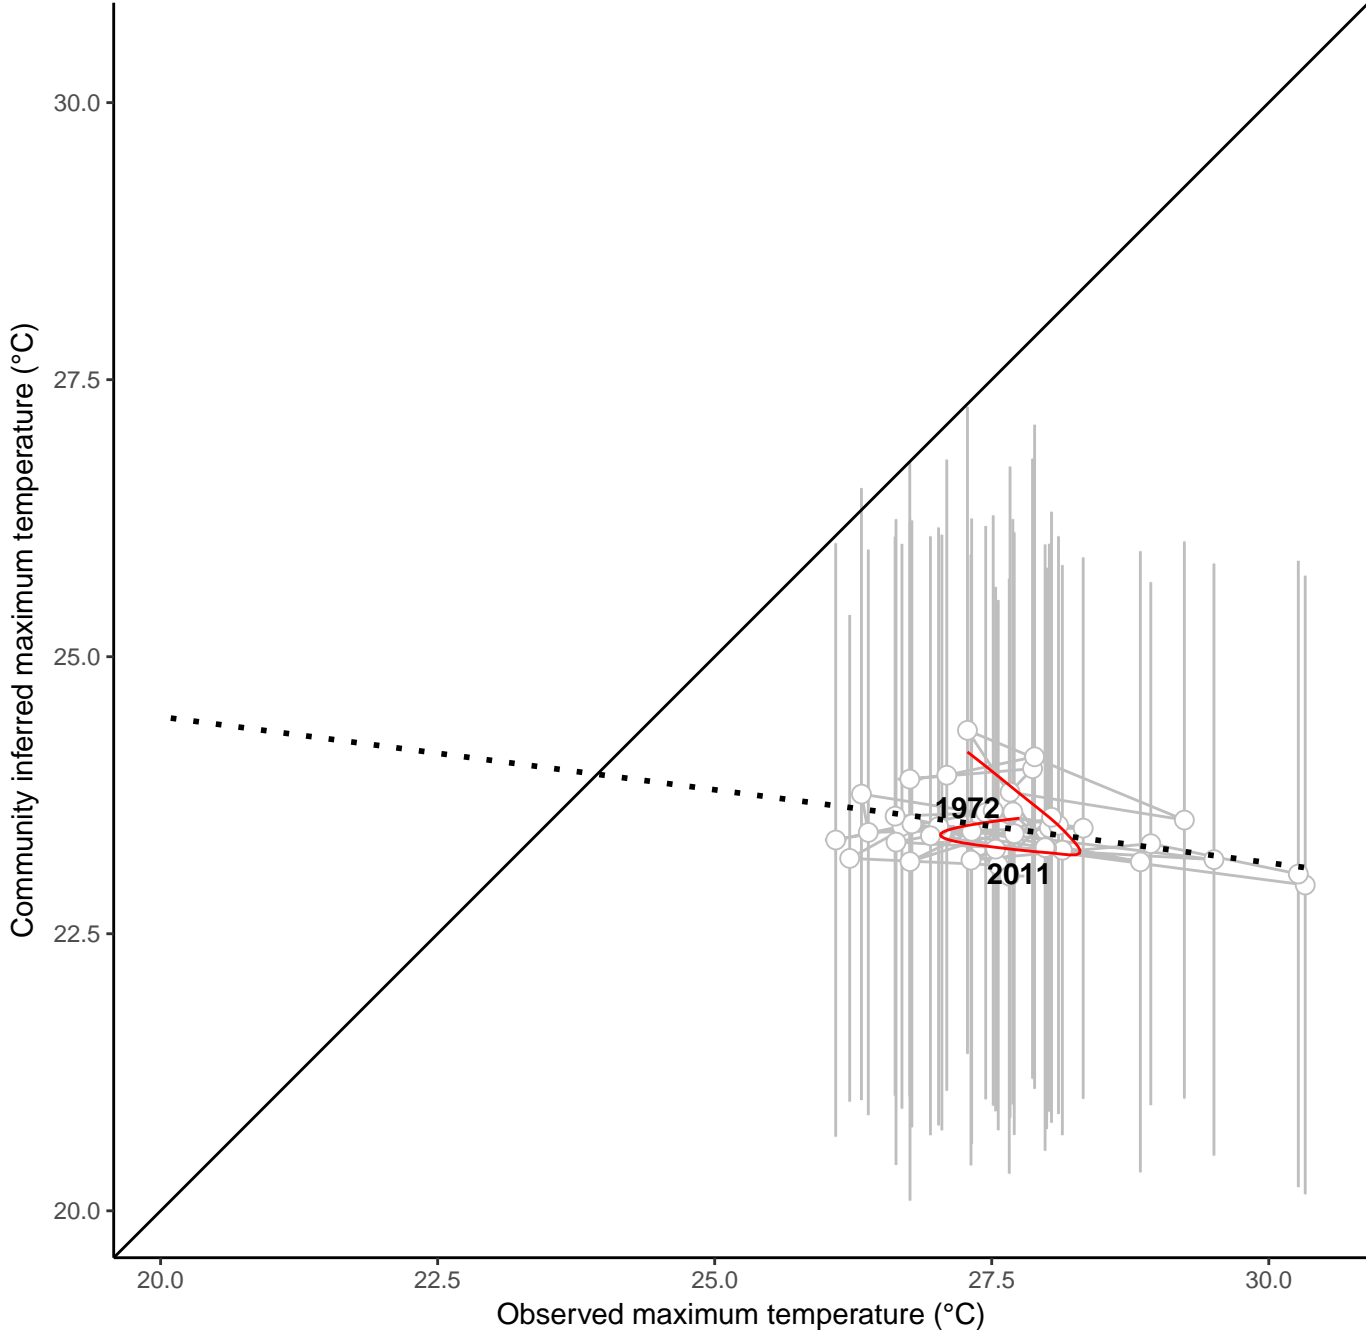

site : 840\_34\_47

absolute deviation = 4.25 | deviation change = 0.59 | maximum state number = 2

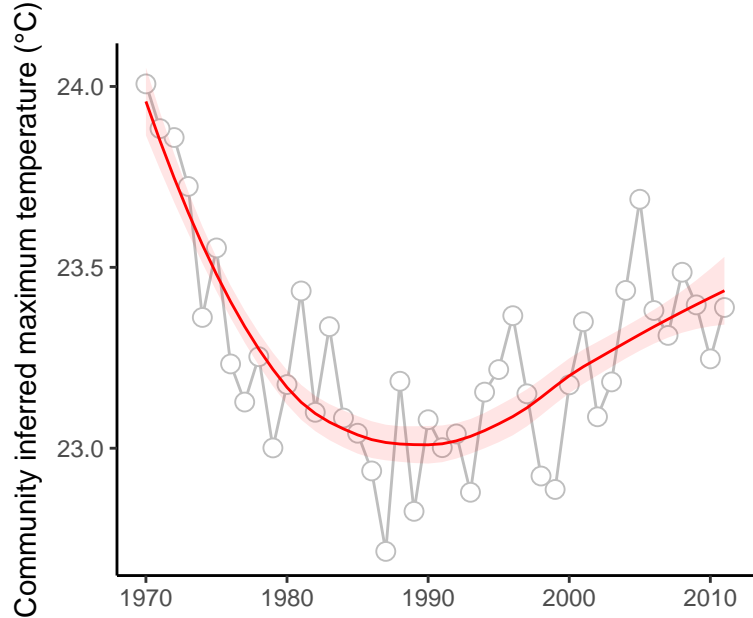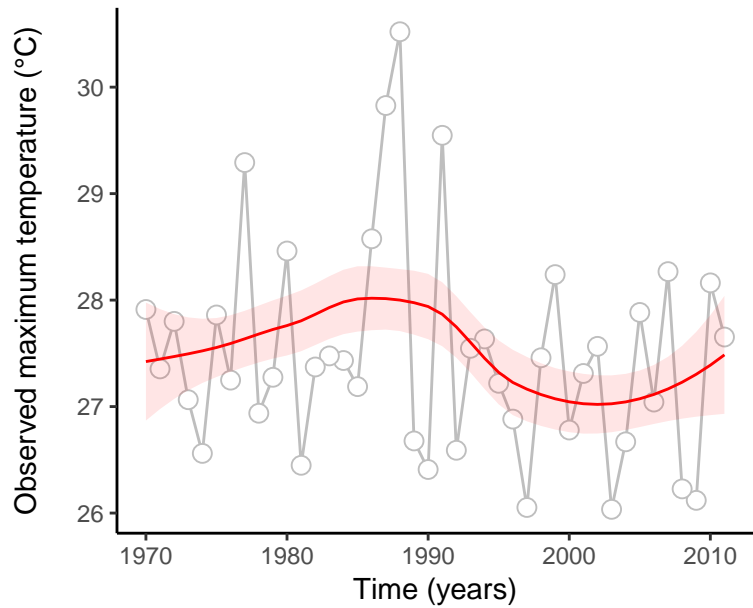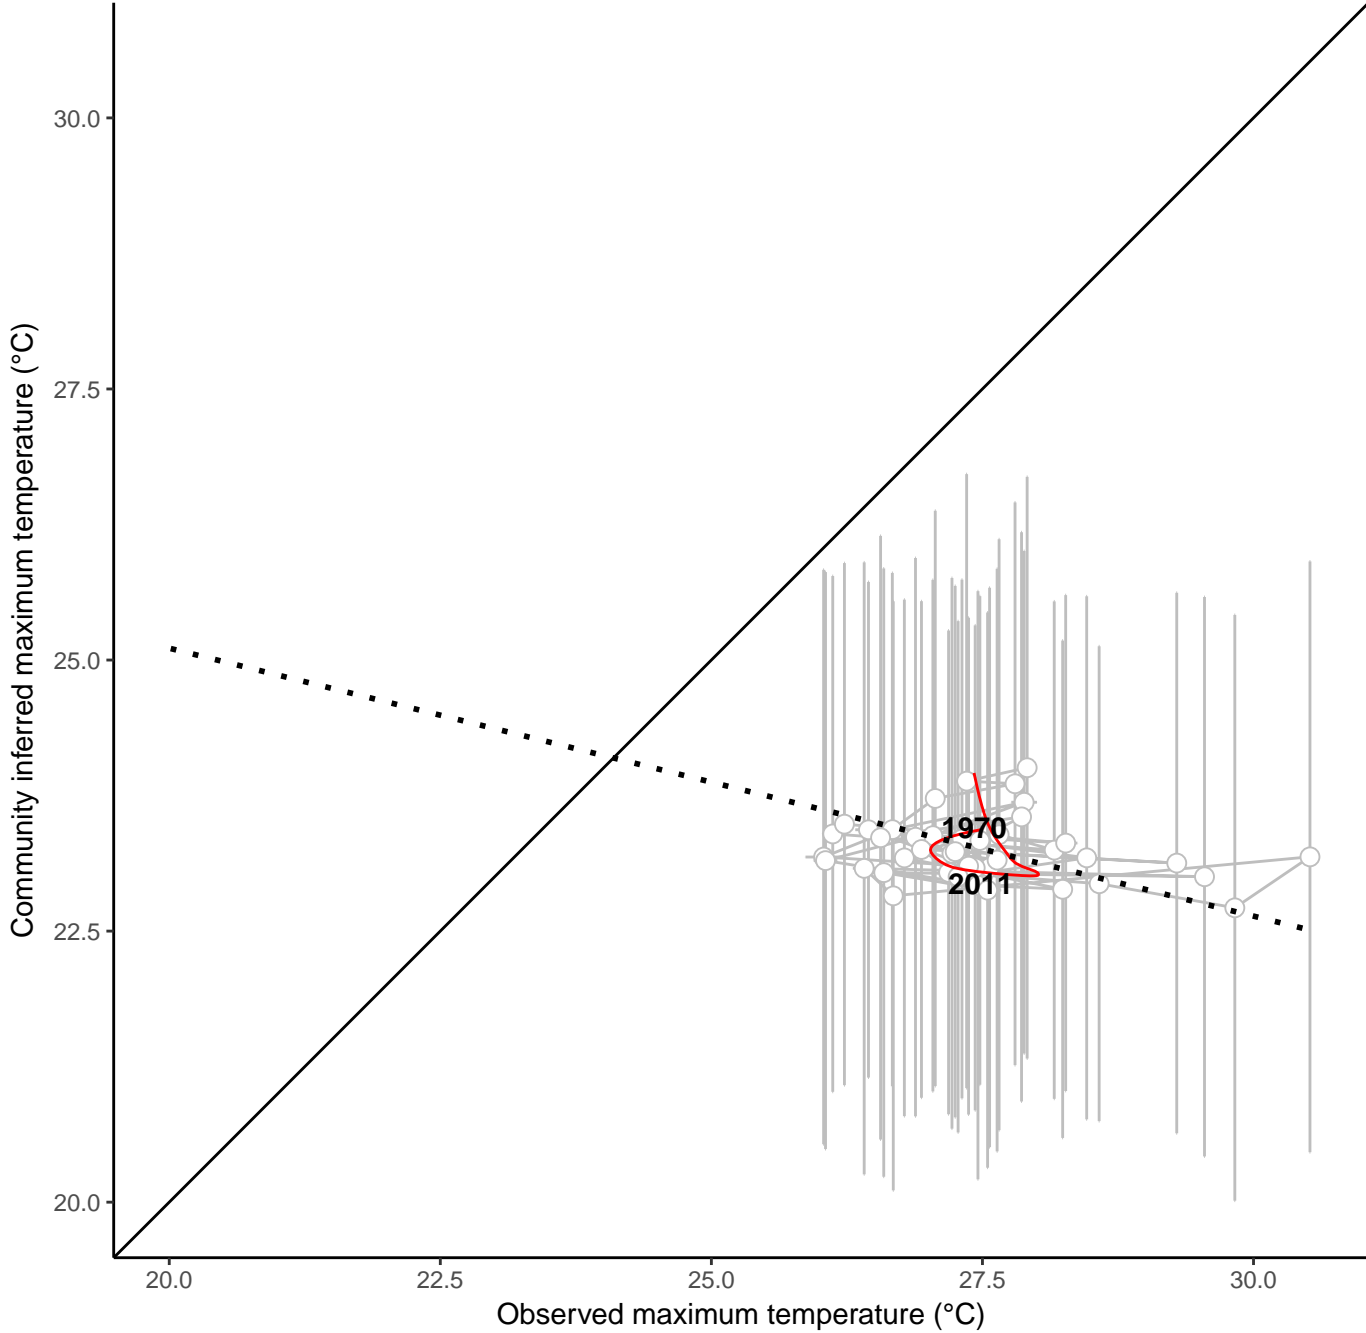

site : 840\_34\_53

absolute deviation = 4.44 | deviation change = 1.56 | maximum state number = 2

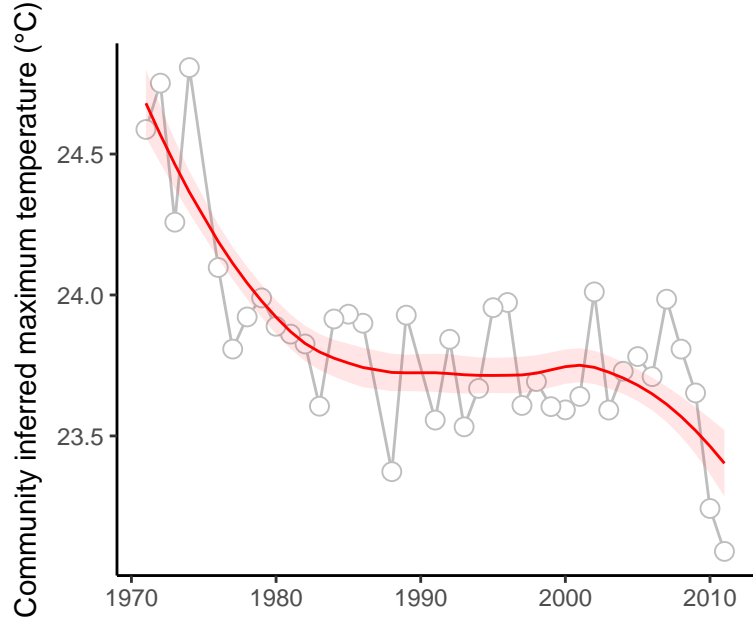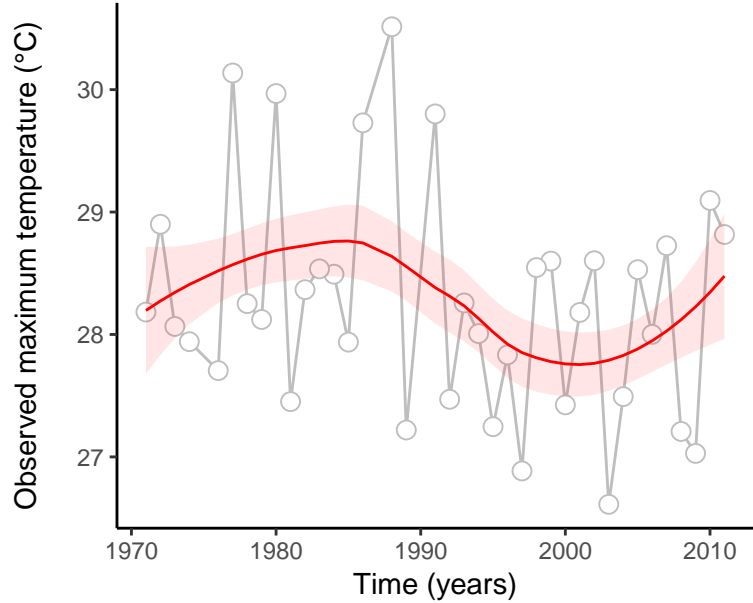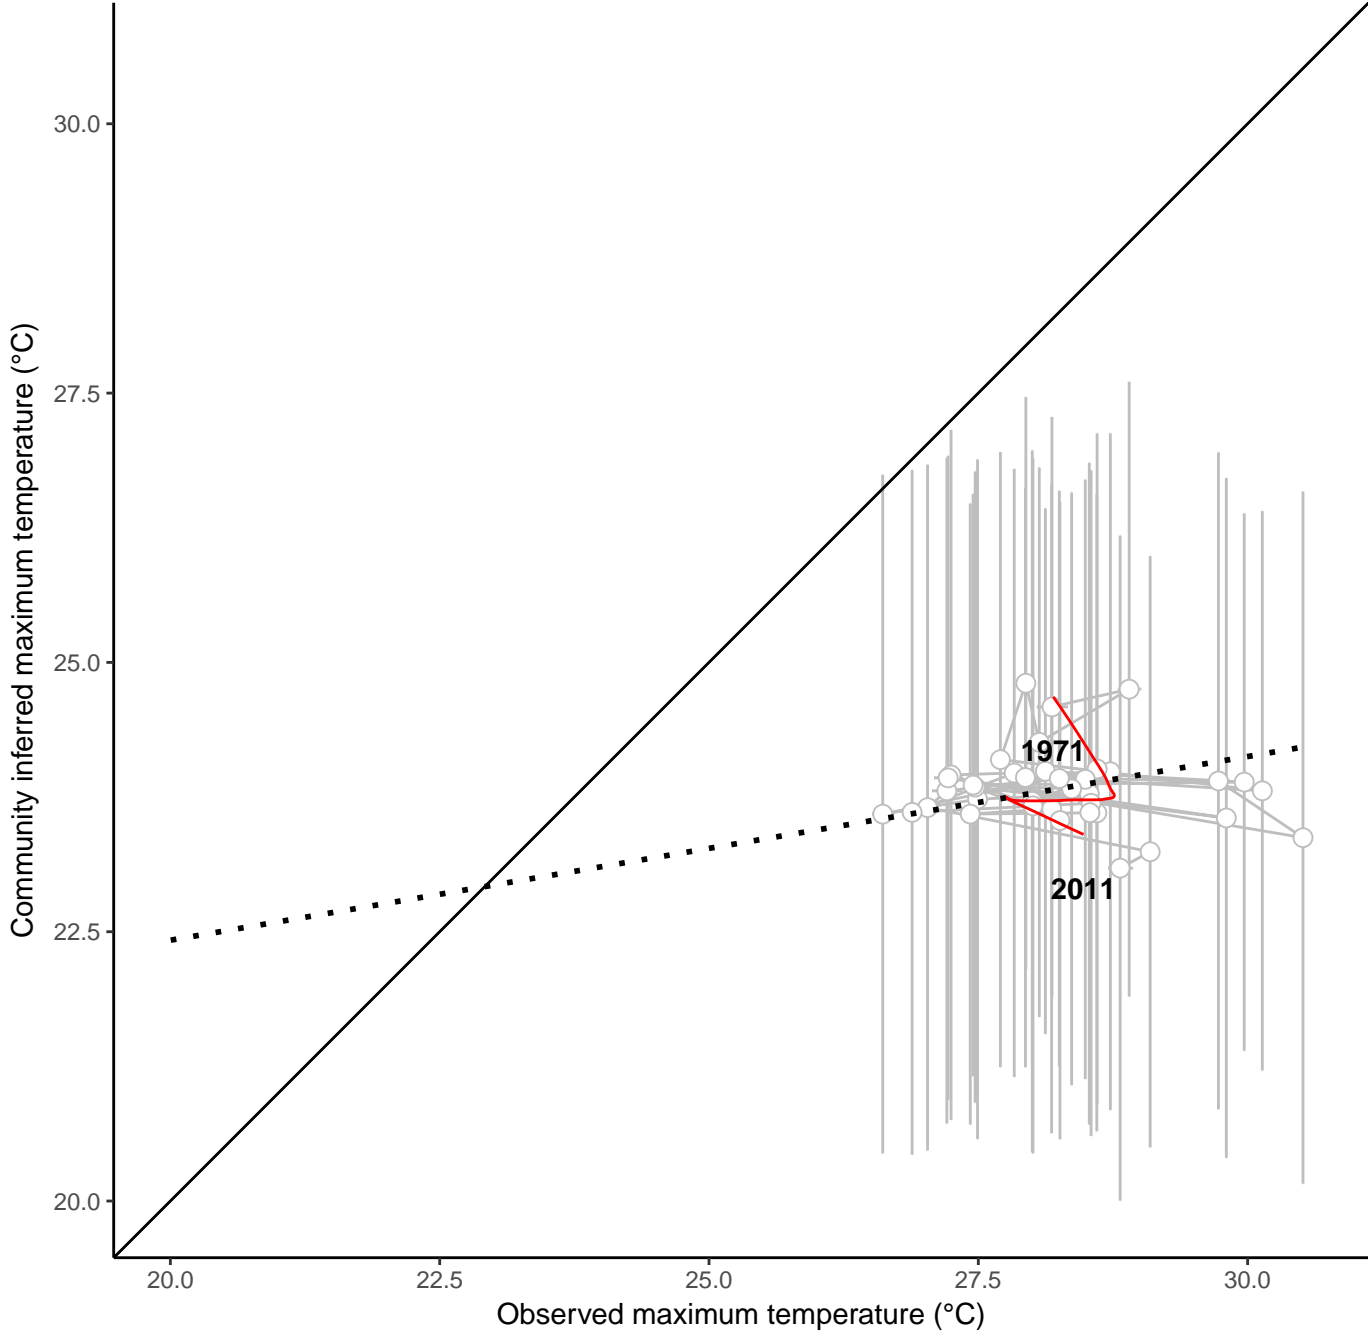

site : 840\_46\_40

absolute deviation = 3.24 | deviation change = 2.15 | maximum state number = 2

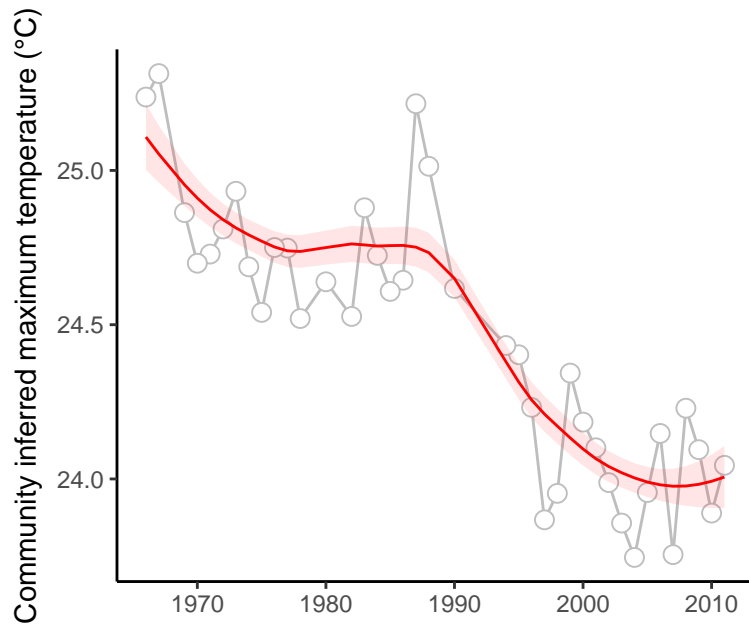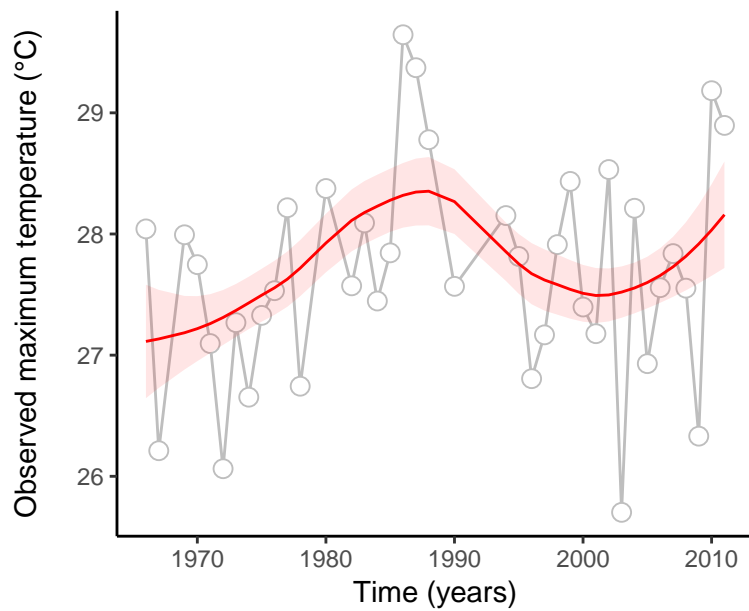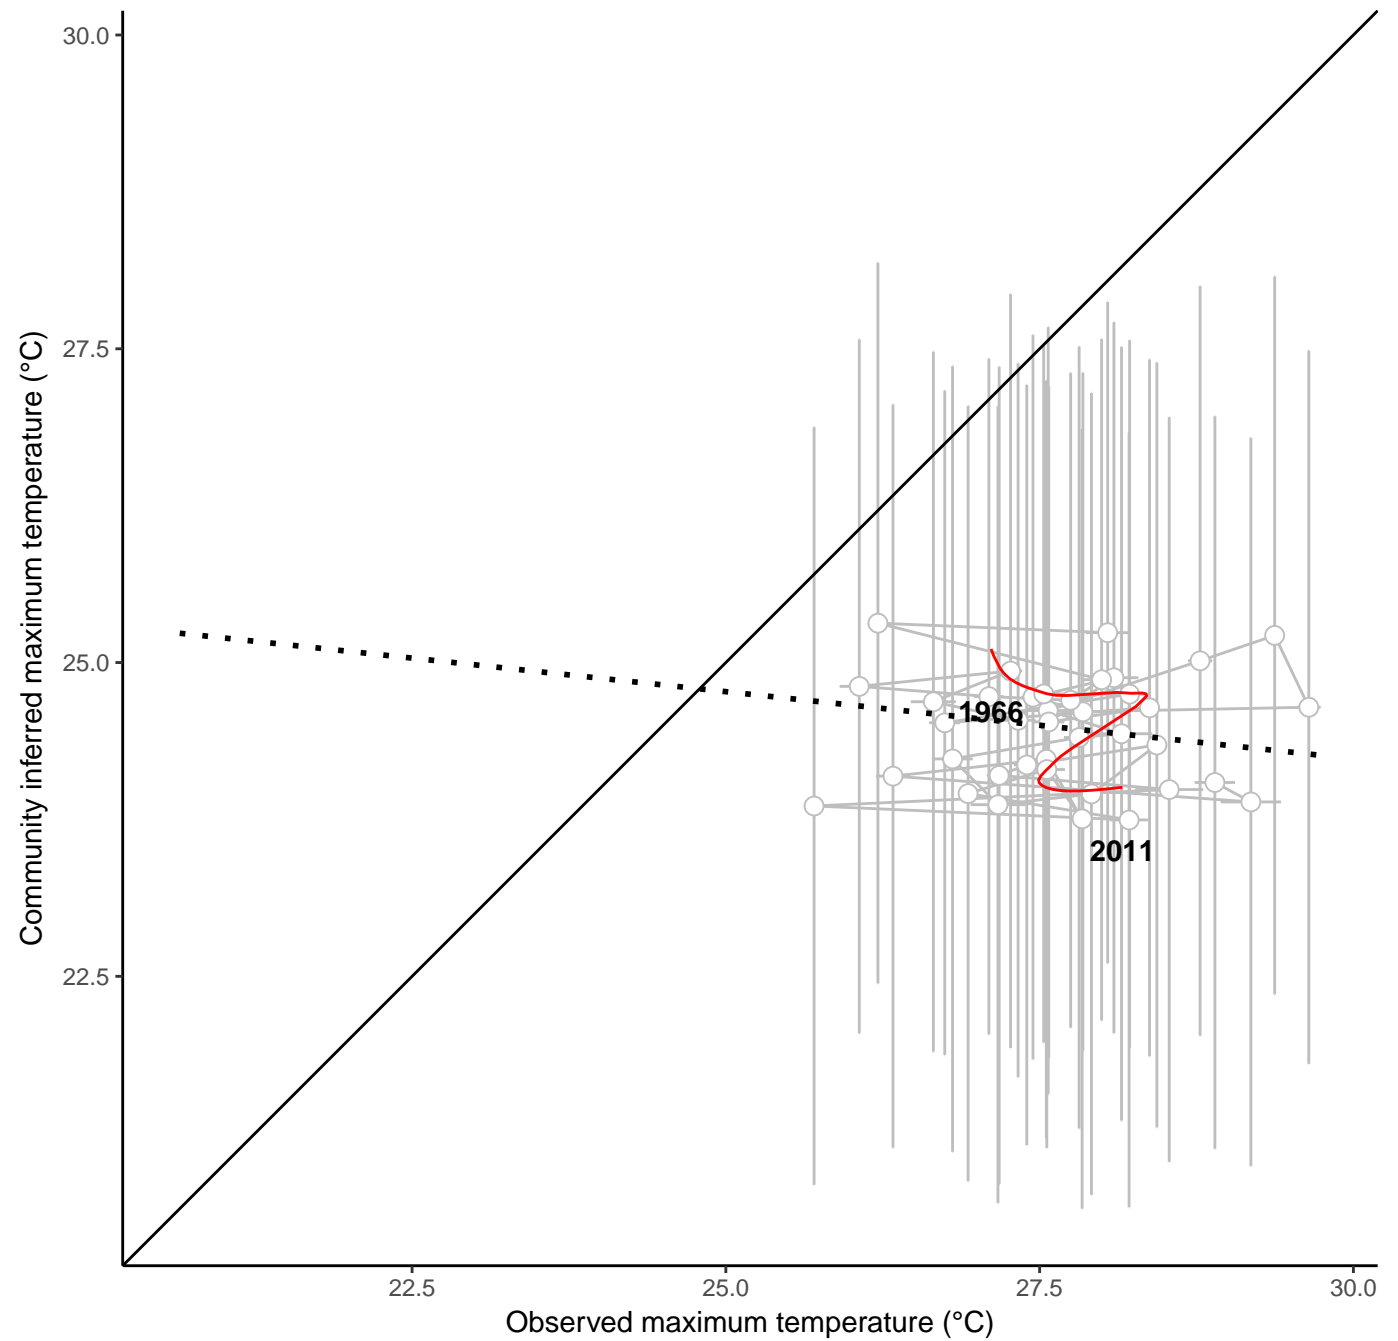

site : 840\_46\_9

absolute deviation = 2.55 | deviation change = 0.31 | maximum state number = 1

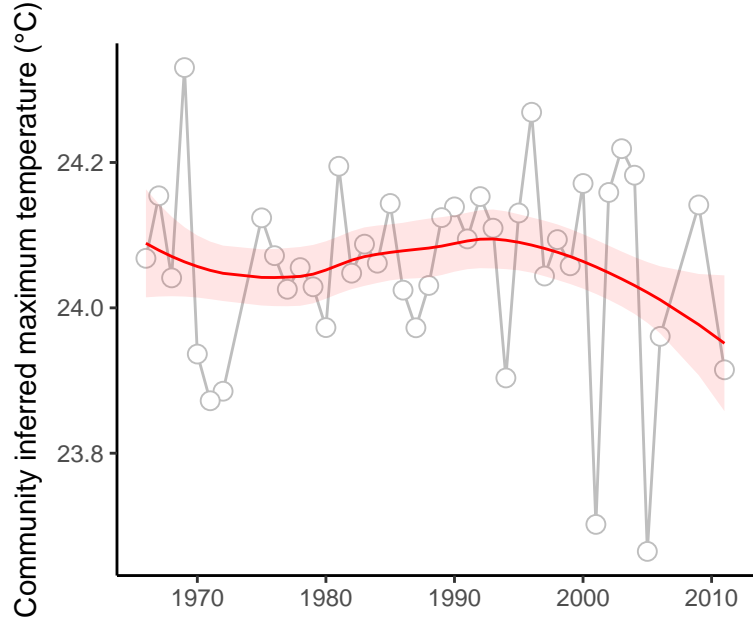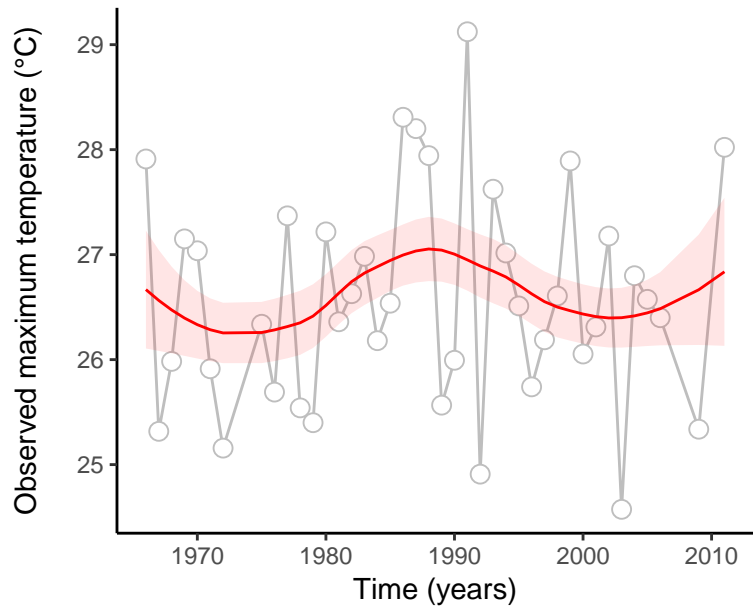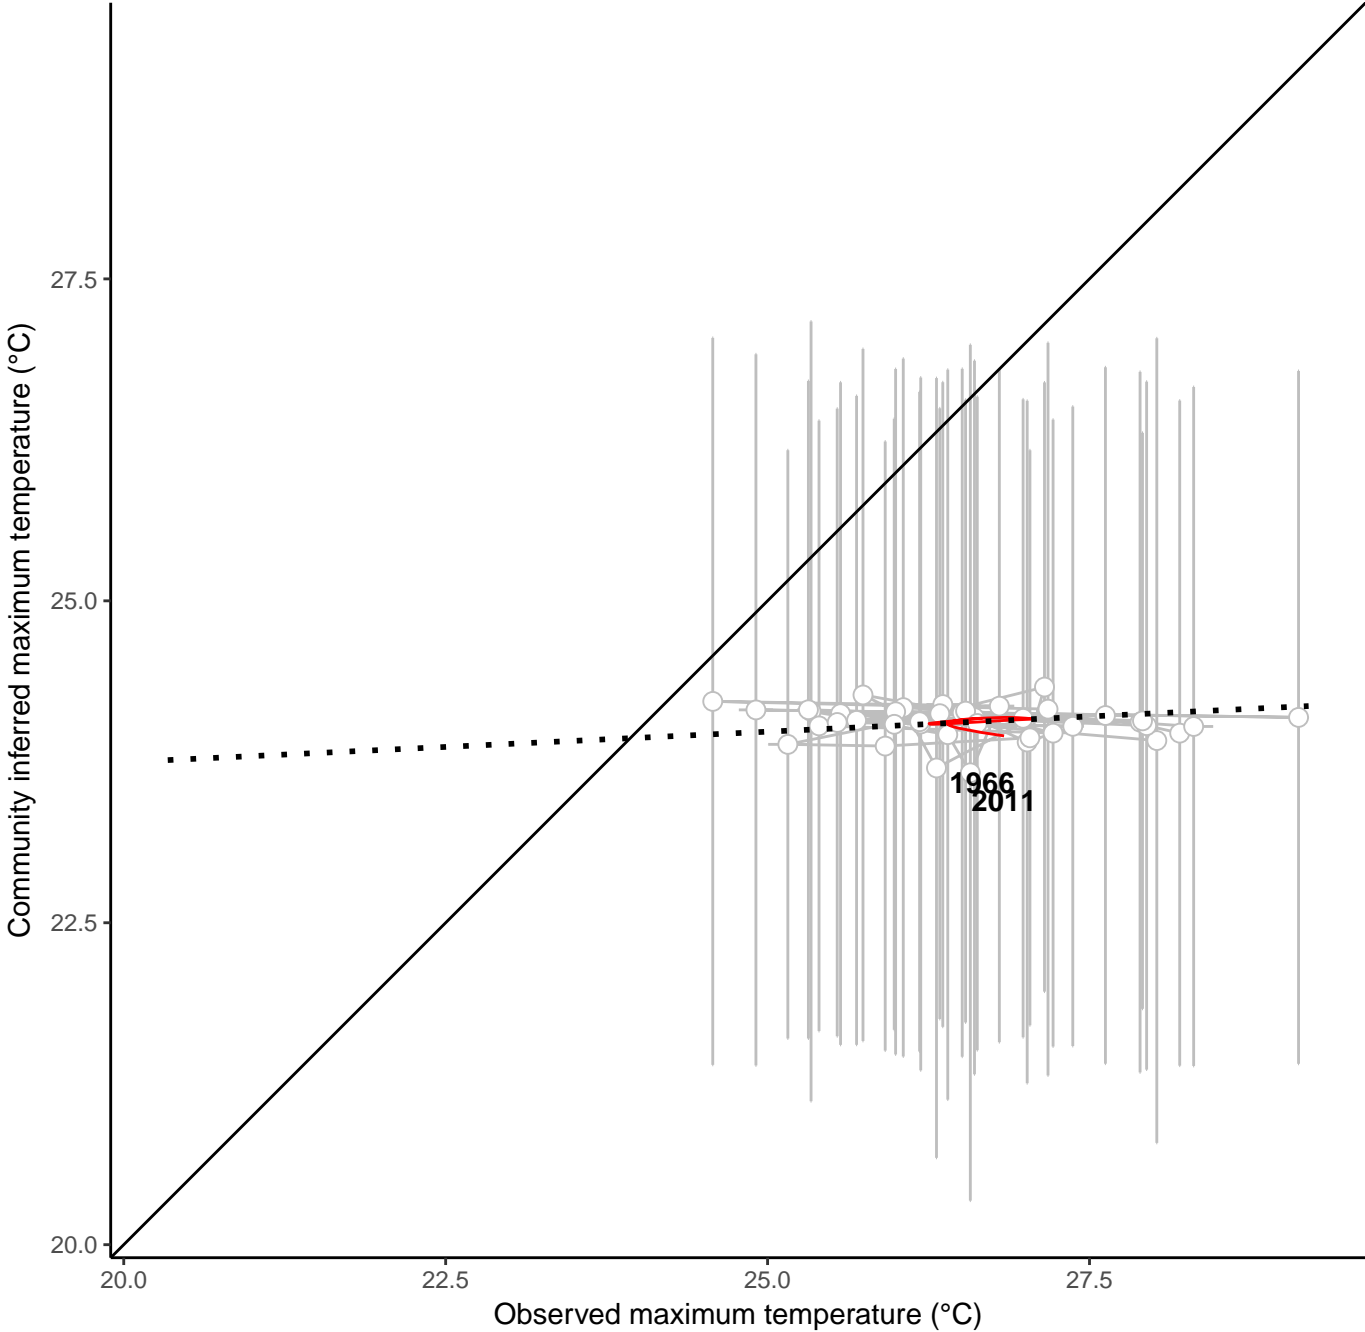

site : 840\_47\_1

absolute deviation = 1.97 | deviation change = -0.01 | maximum state number = 1

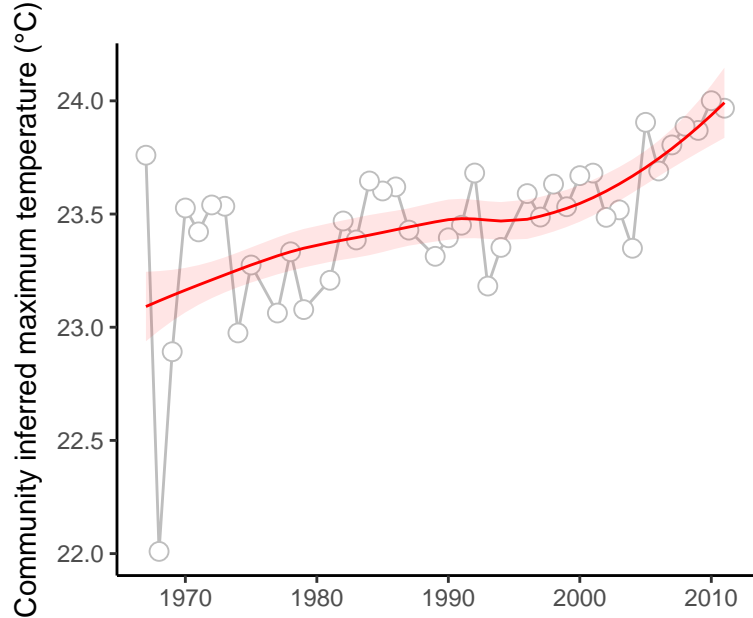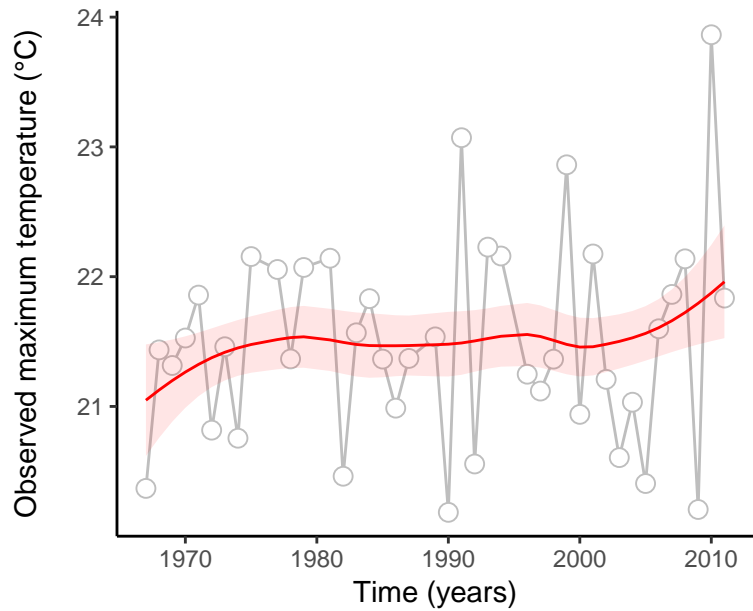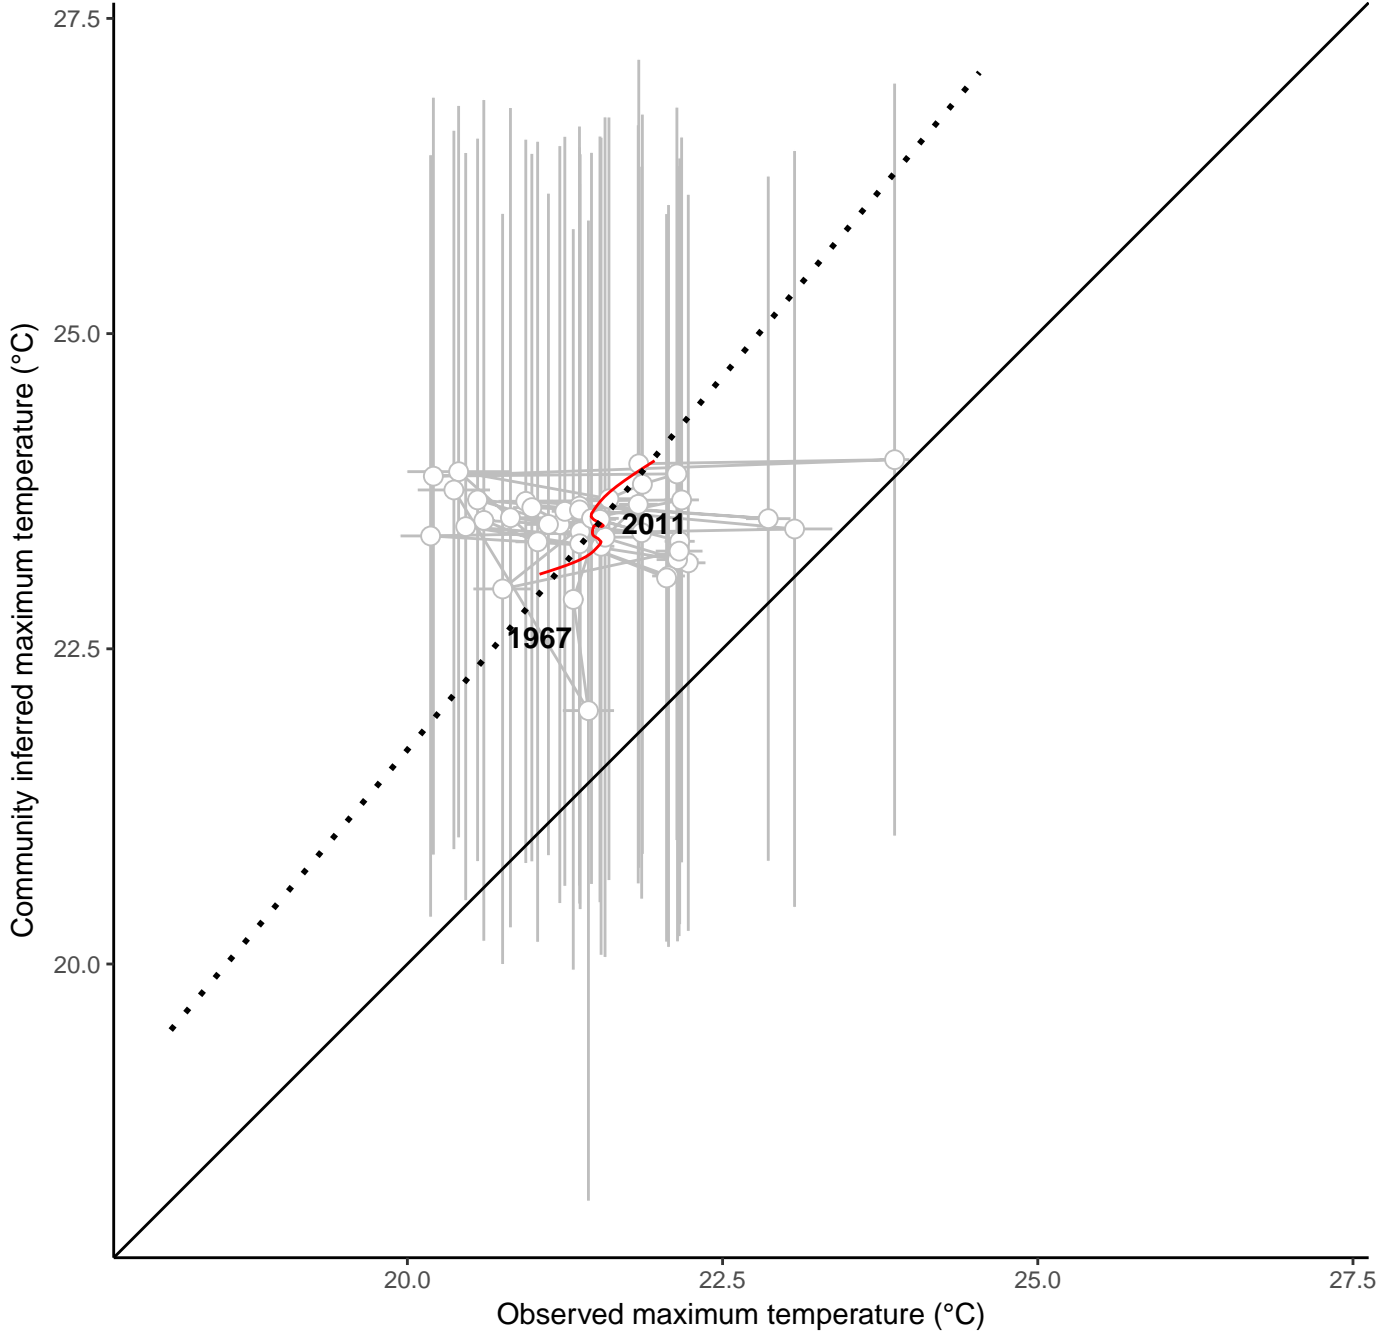

site : 840\_83\_48

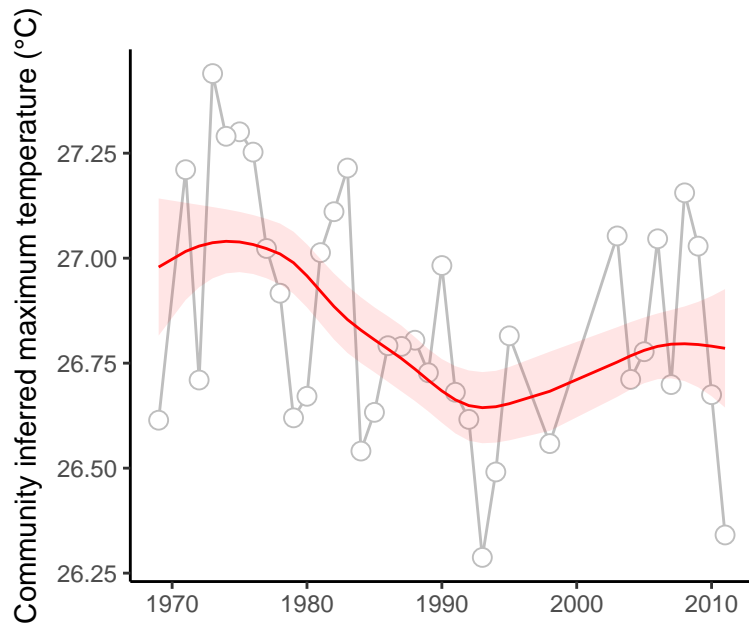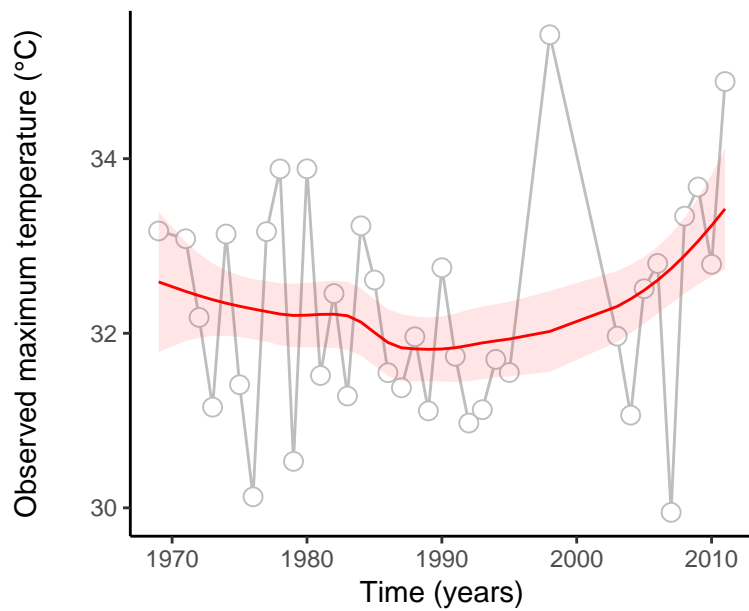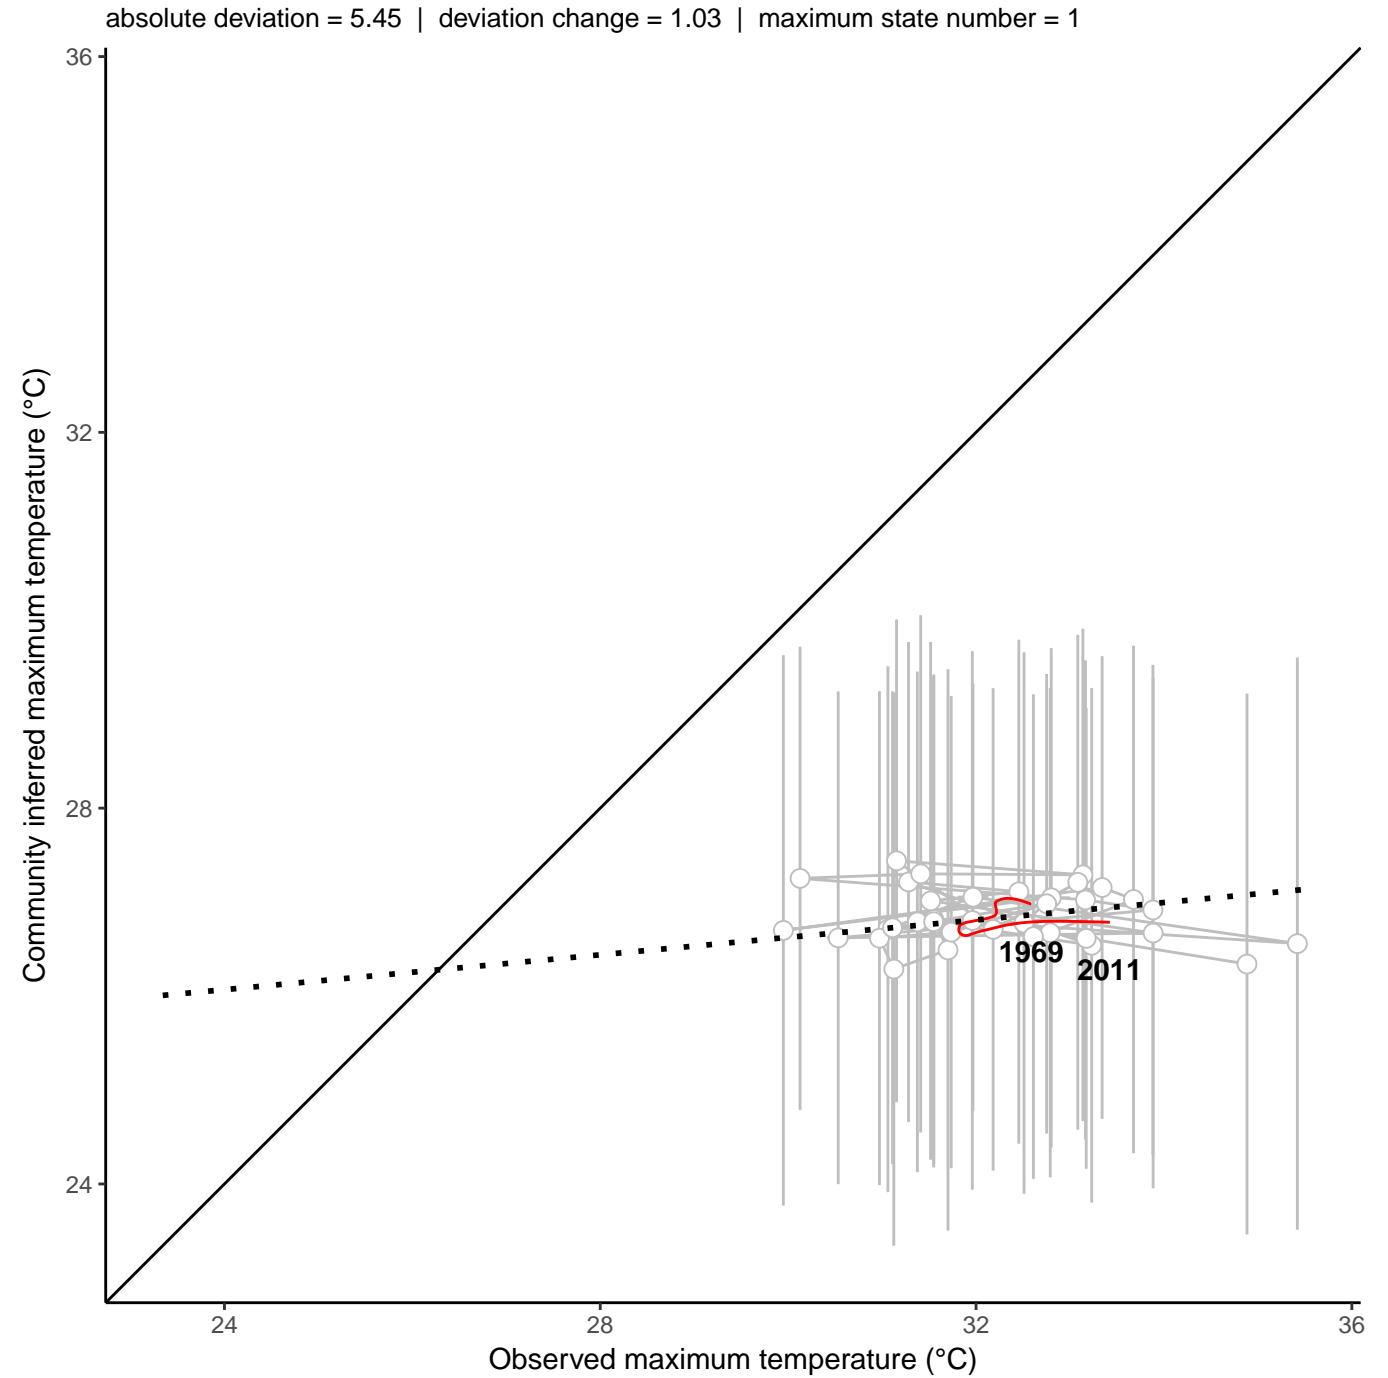



site : 840\_83\_51

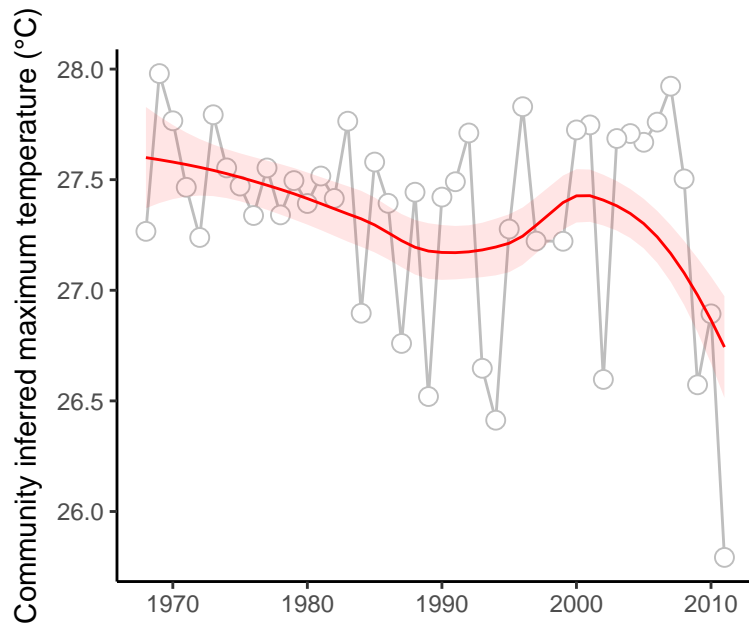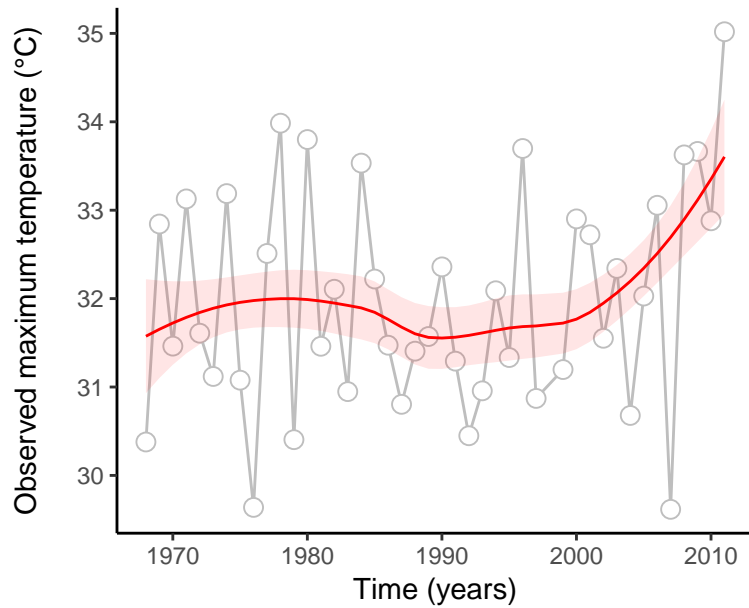

absolute deviation = 4.67 | deviation change = 2.89 | maximum state number = 1

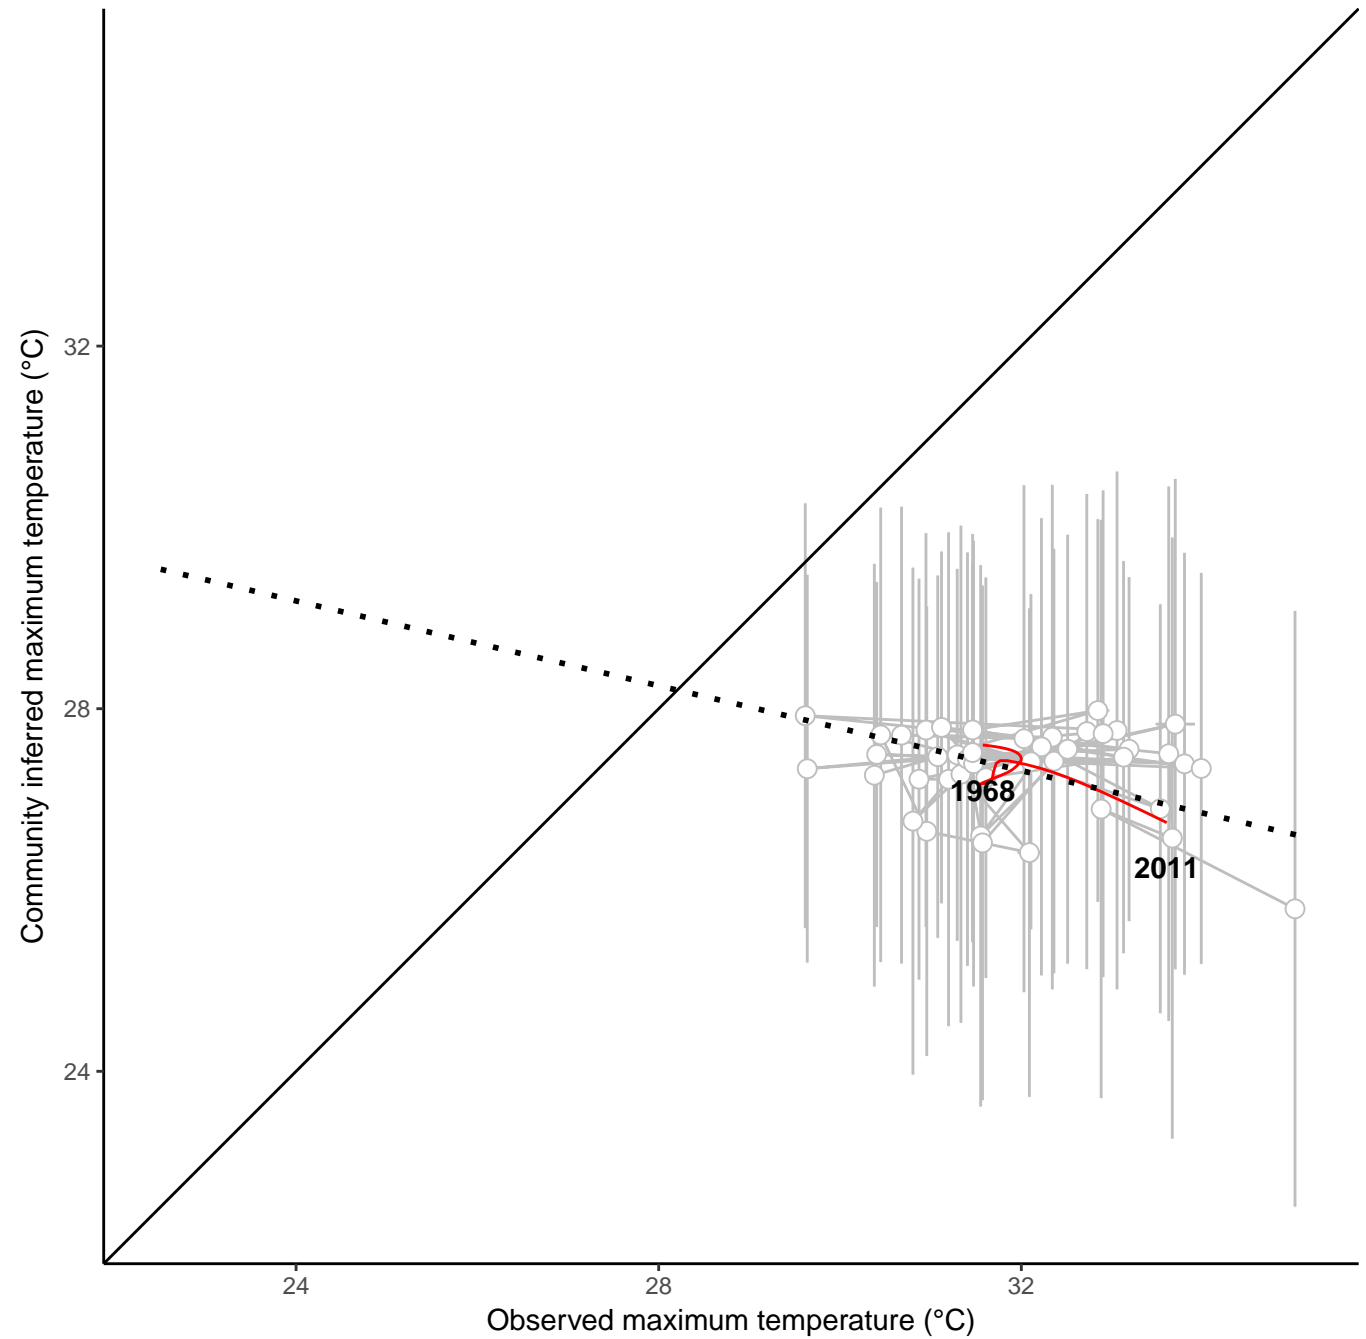

site : 840\_17\_12

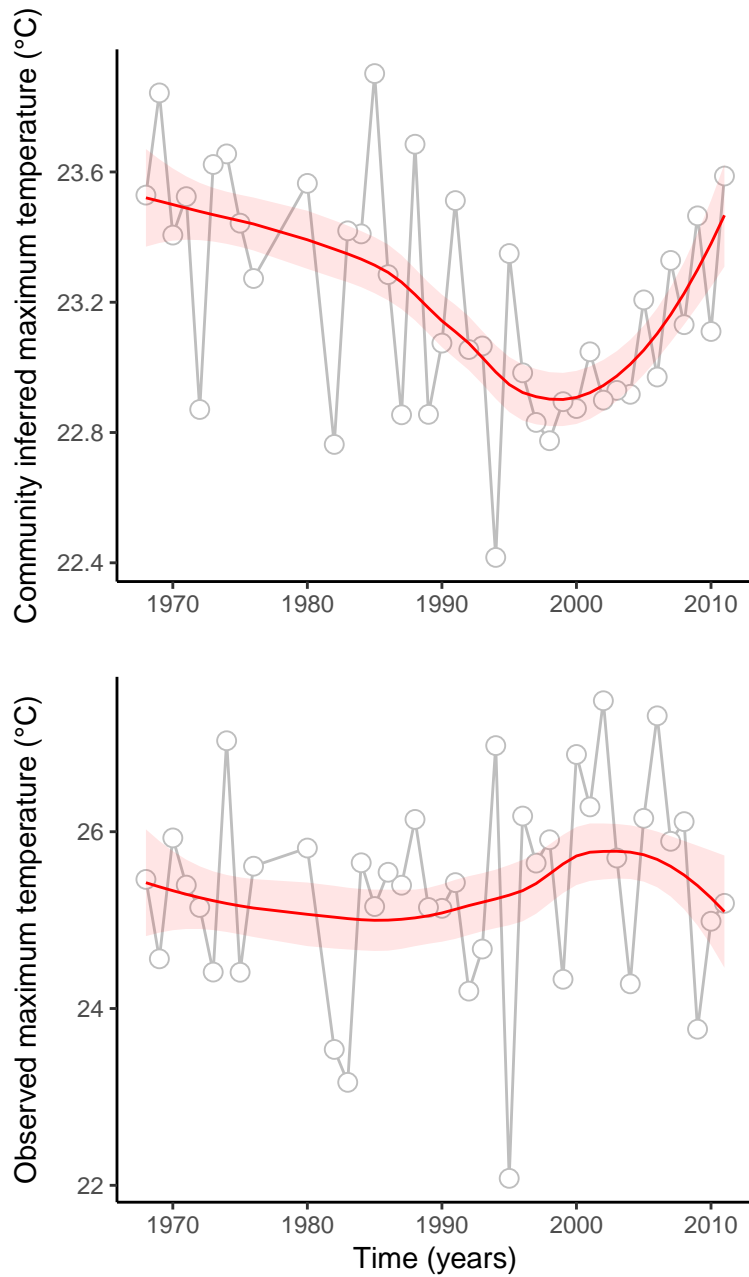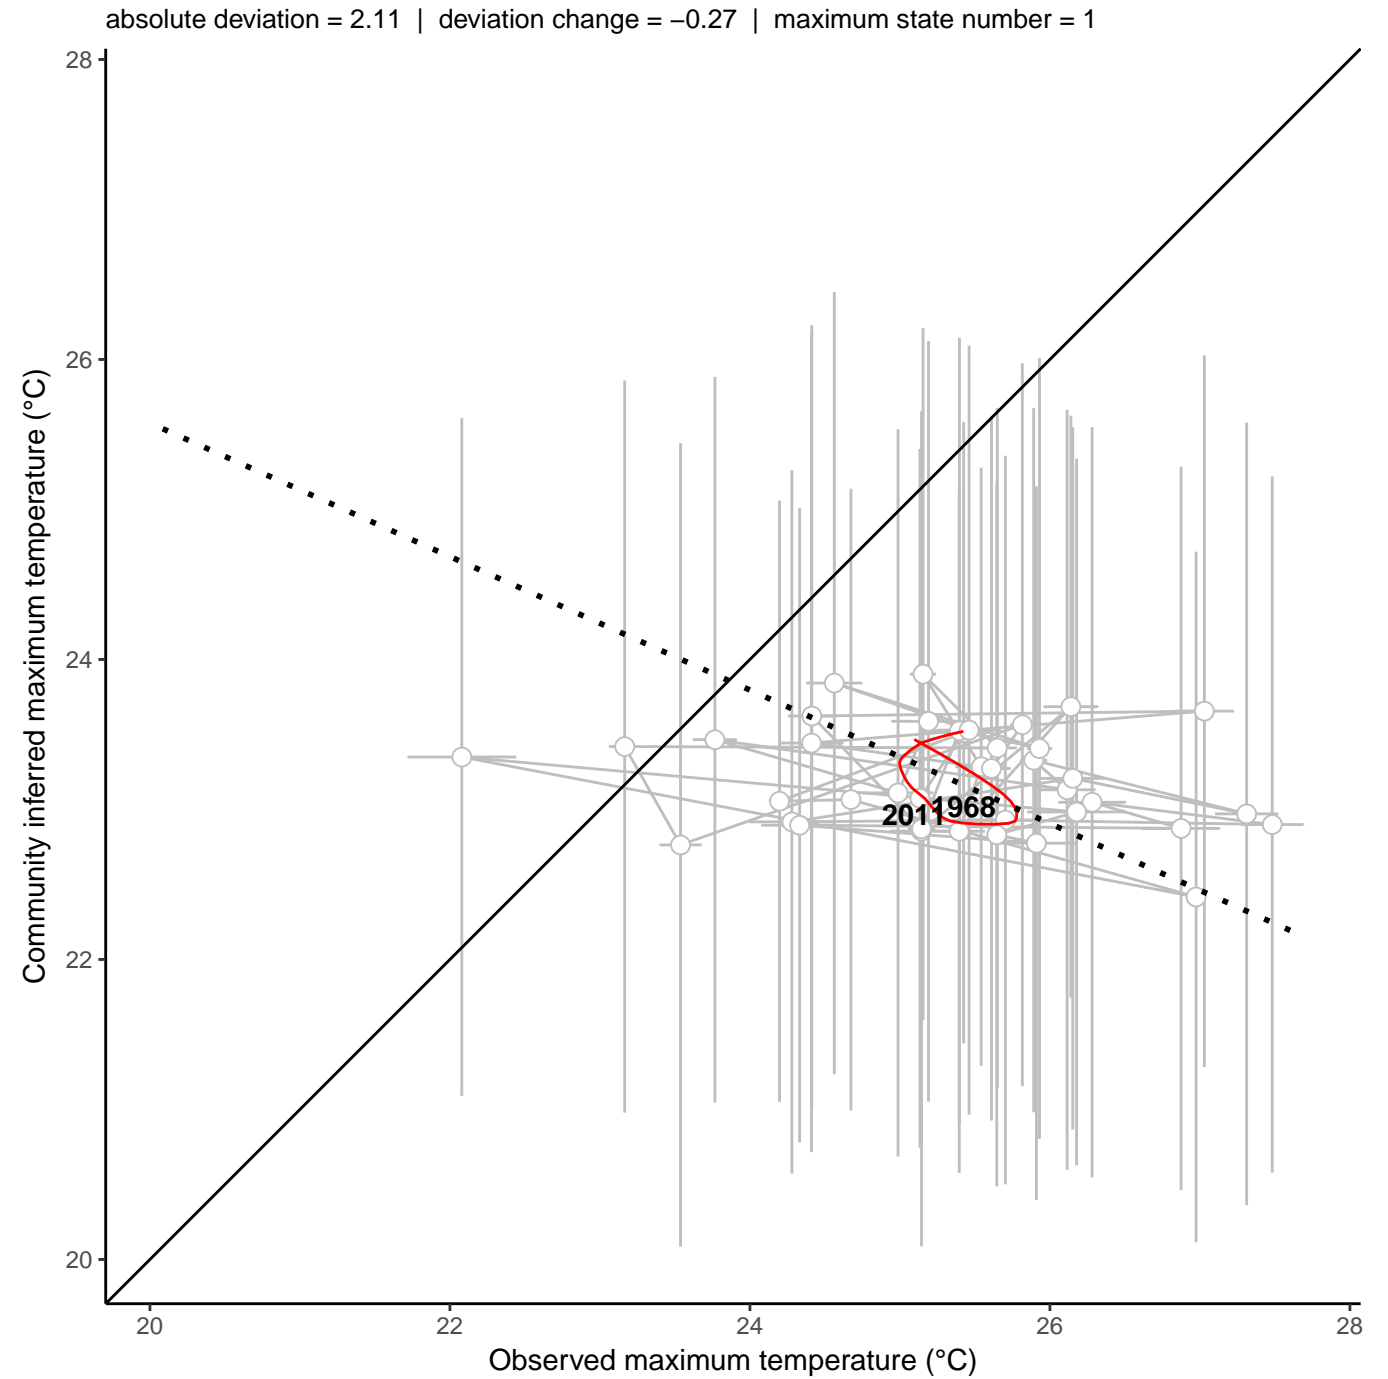

site : 840\_36\_24

absolute deviation = 2.9 | deviation change = 0.73 | maximum state number = 1

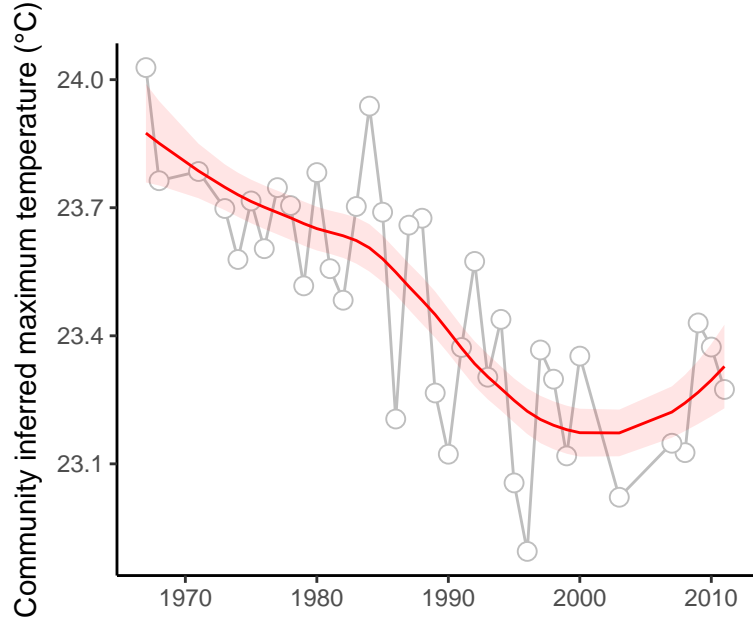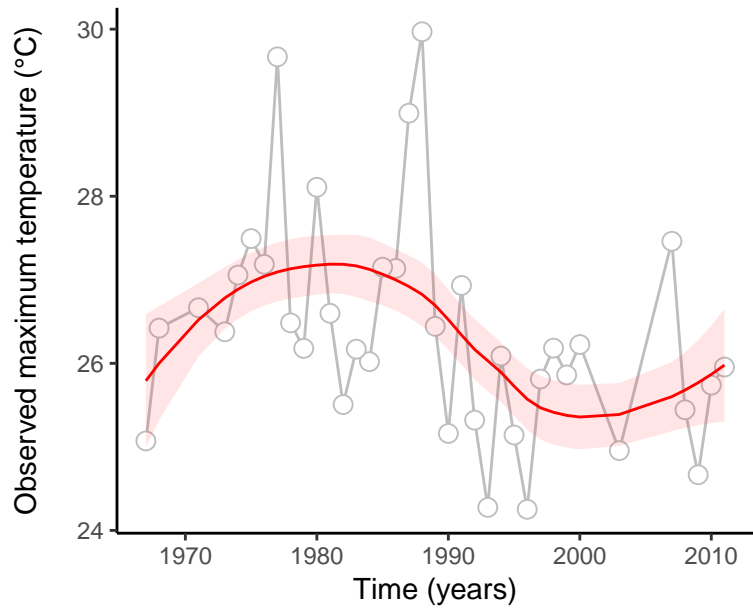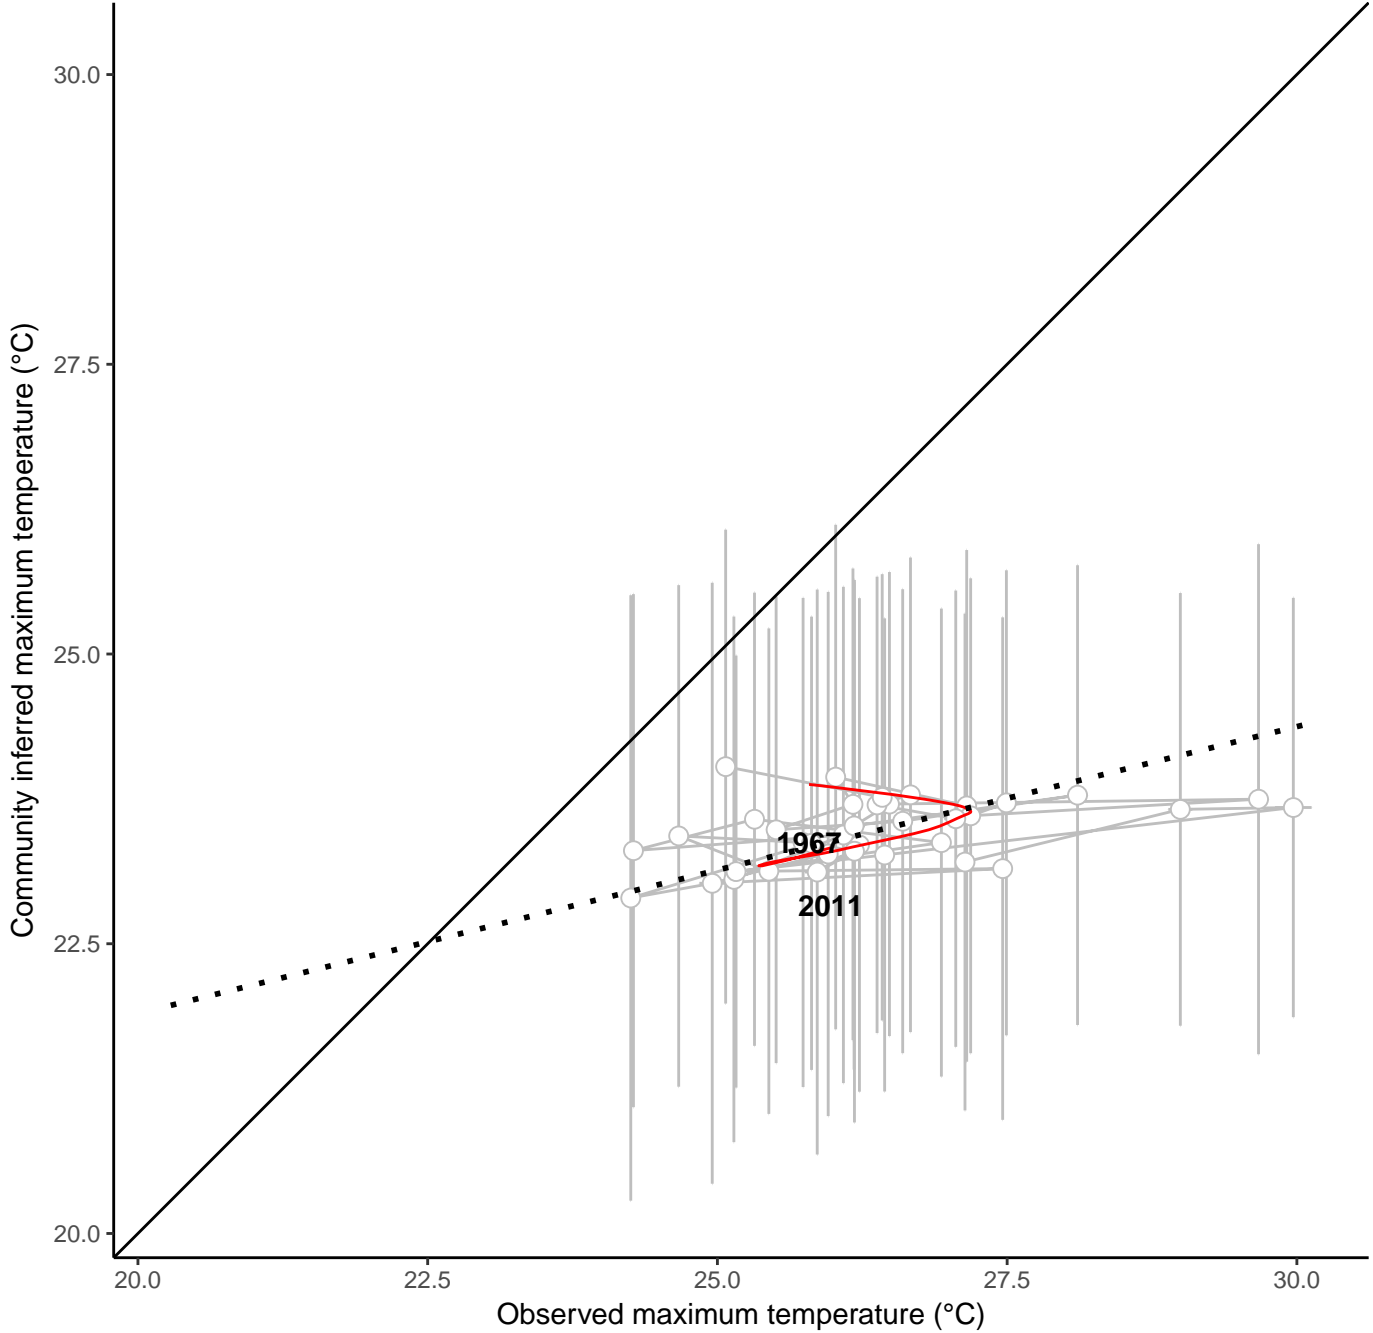

site : 840\_38\_2

absolute deviation = 3.2 | deviation change = 0.65 | maximum state number = 1

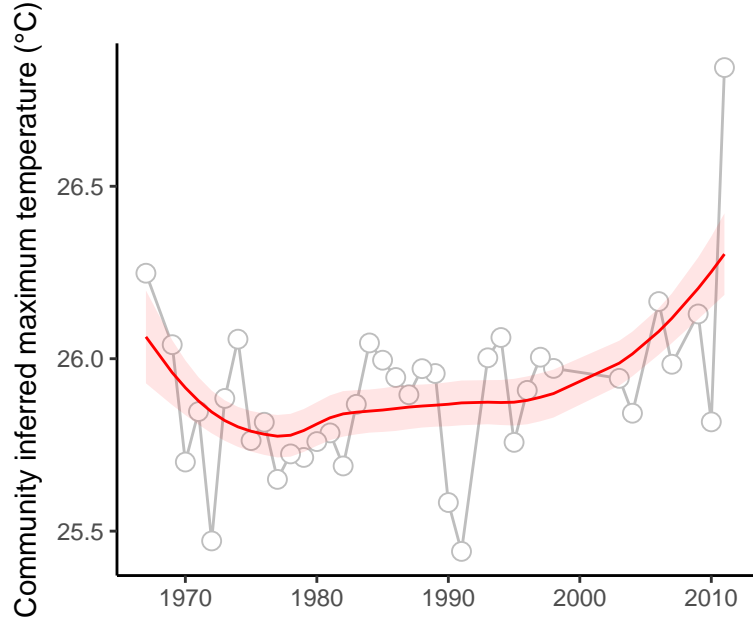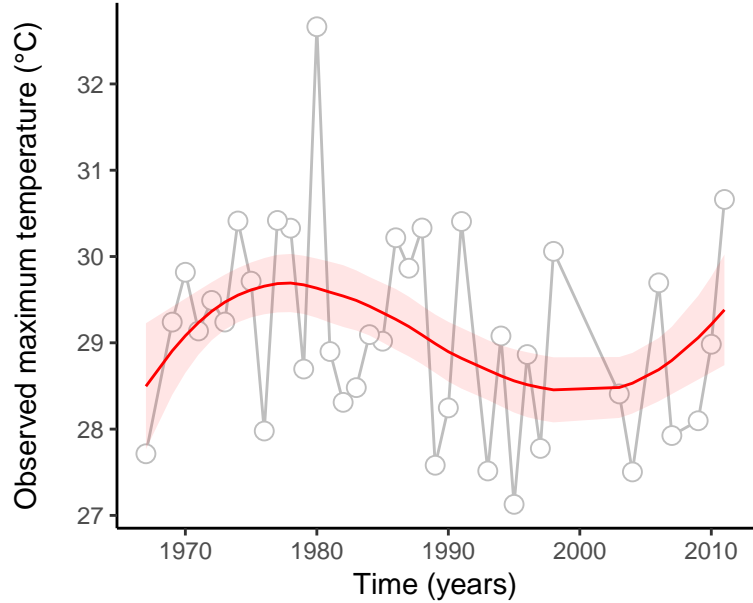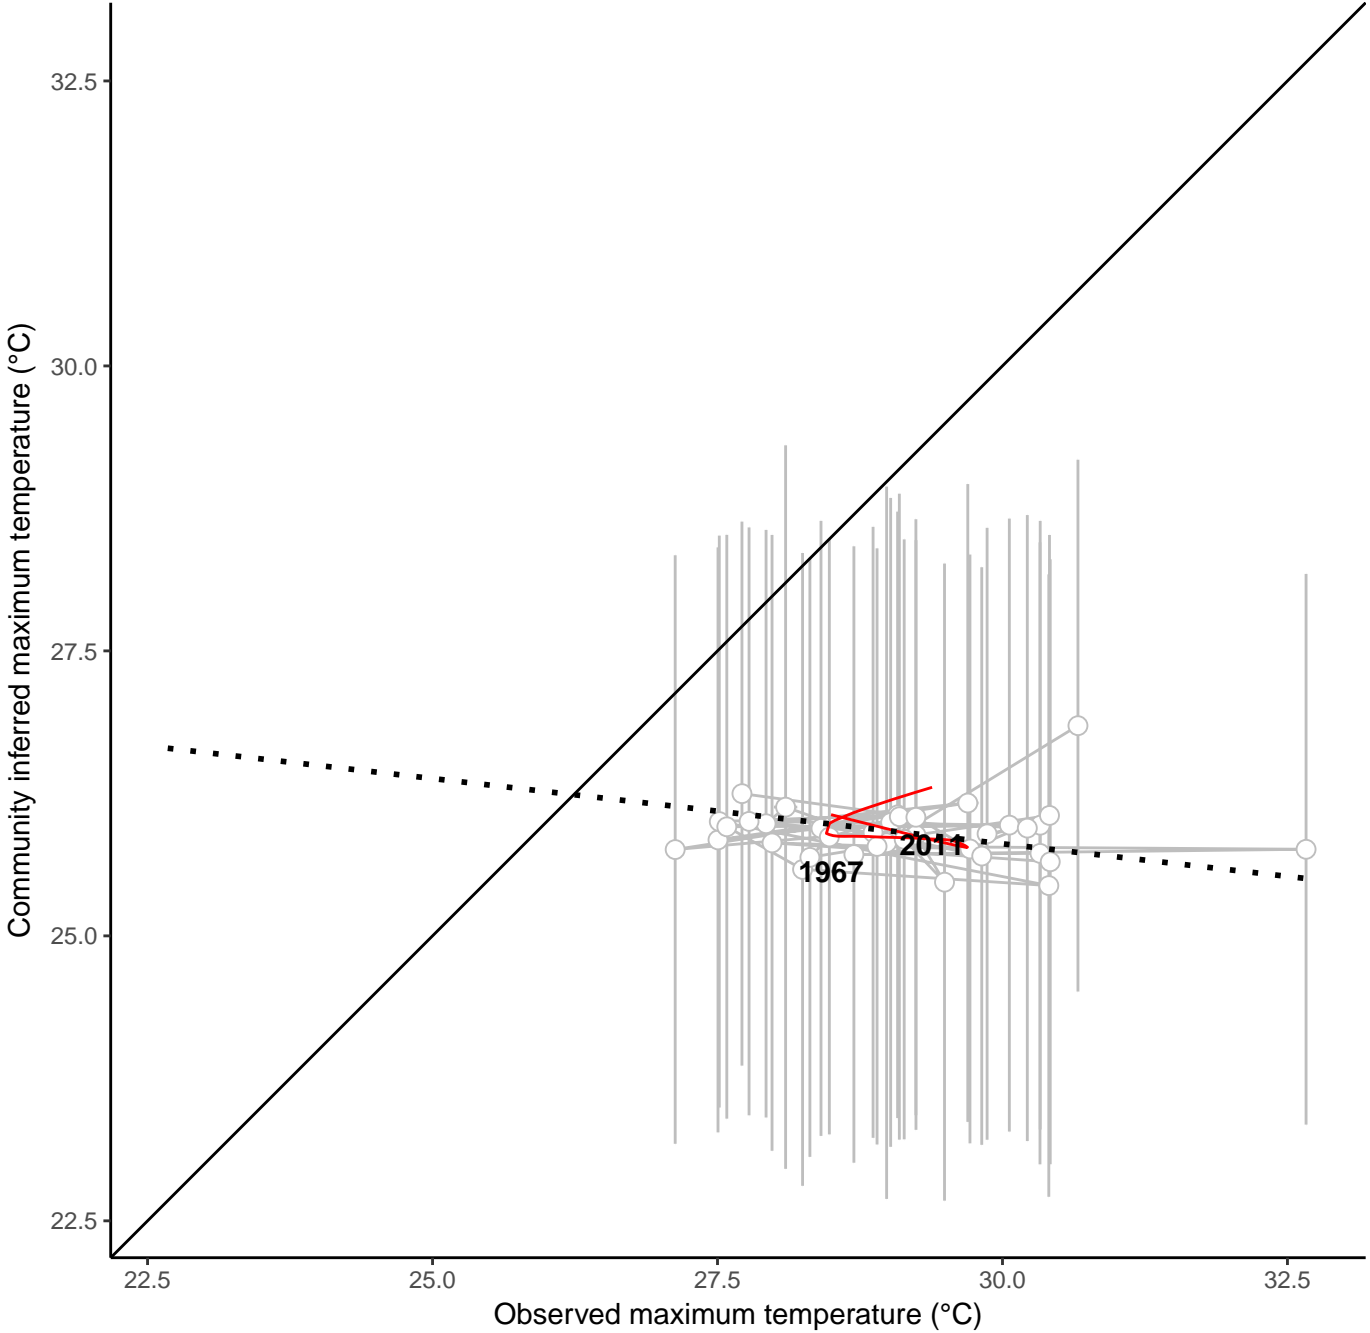

site : 840\_46\_1

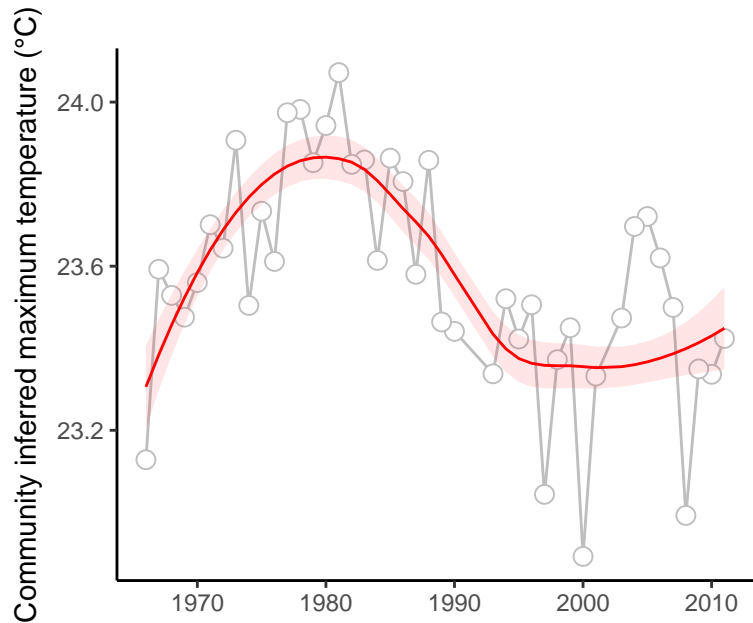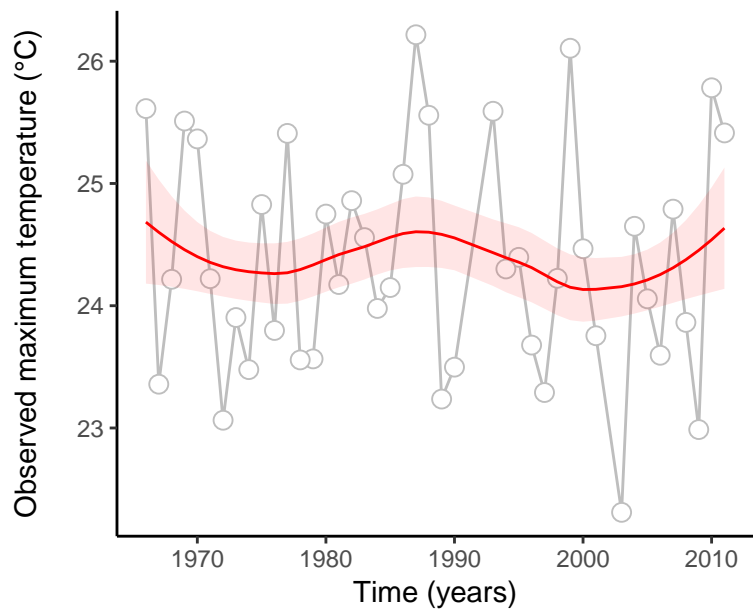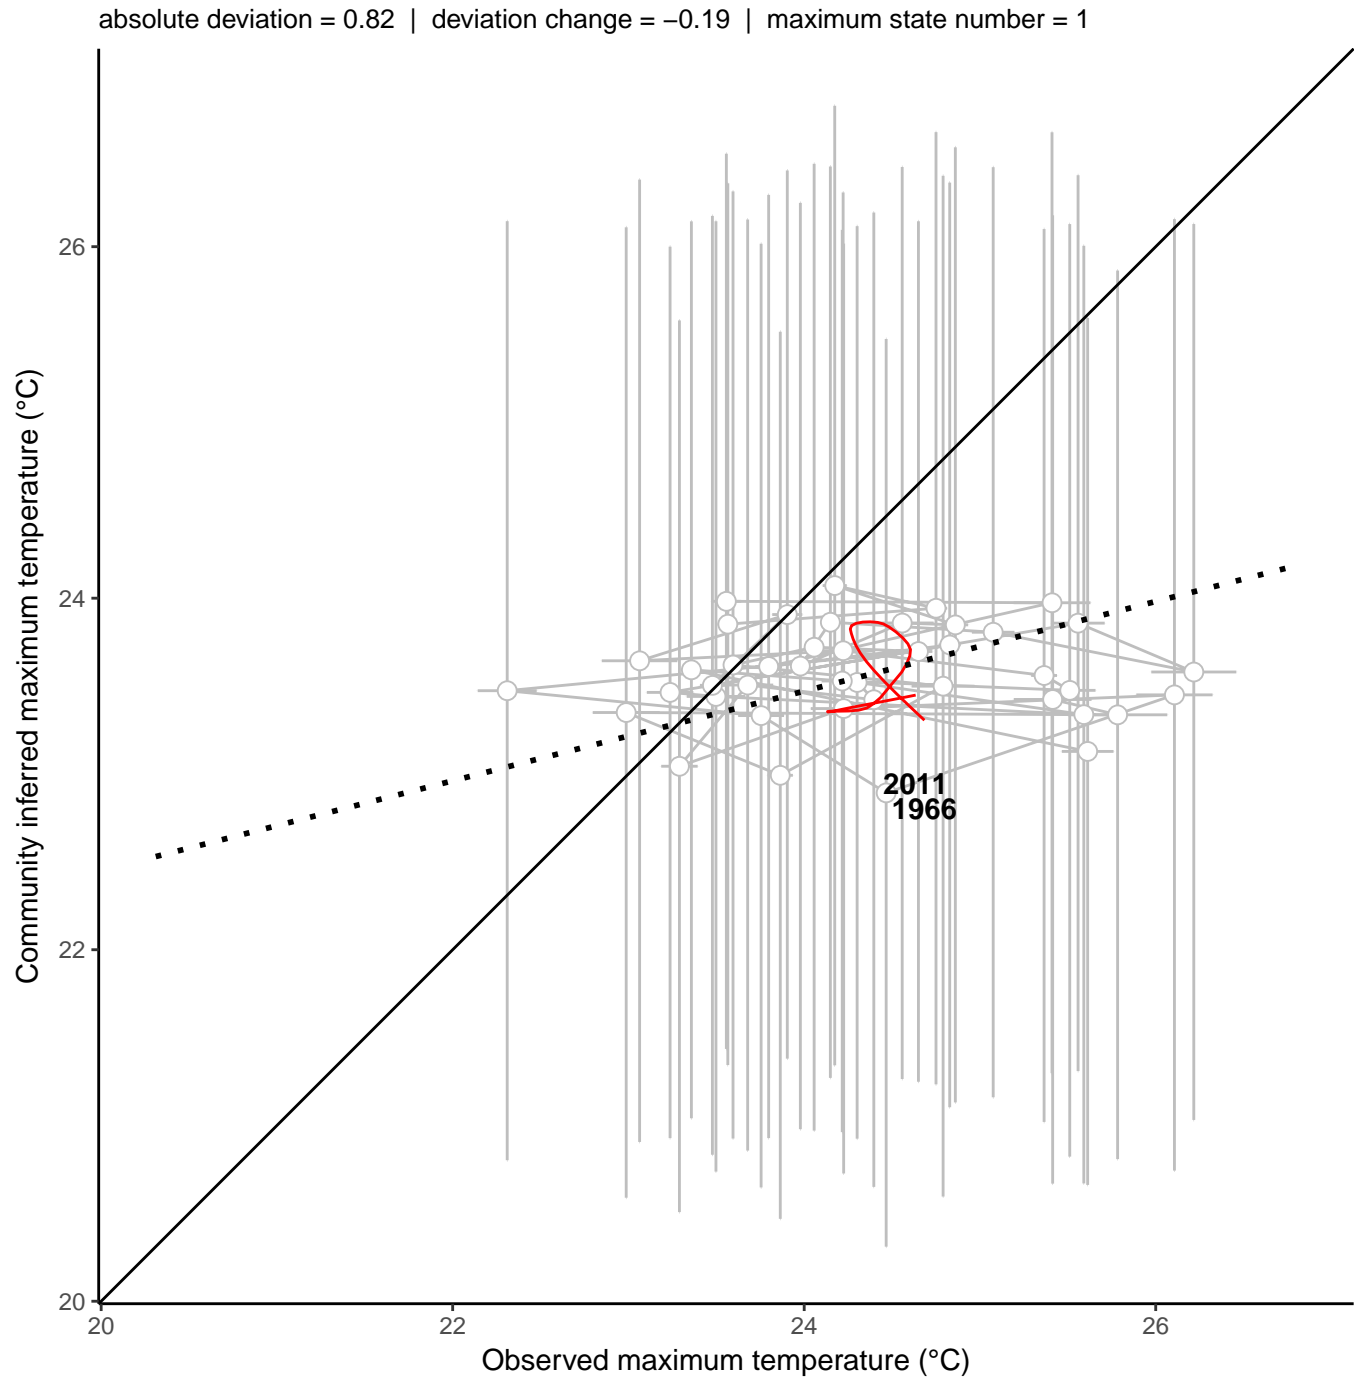

site : 840\_46\_46

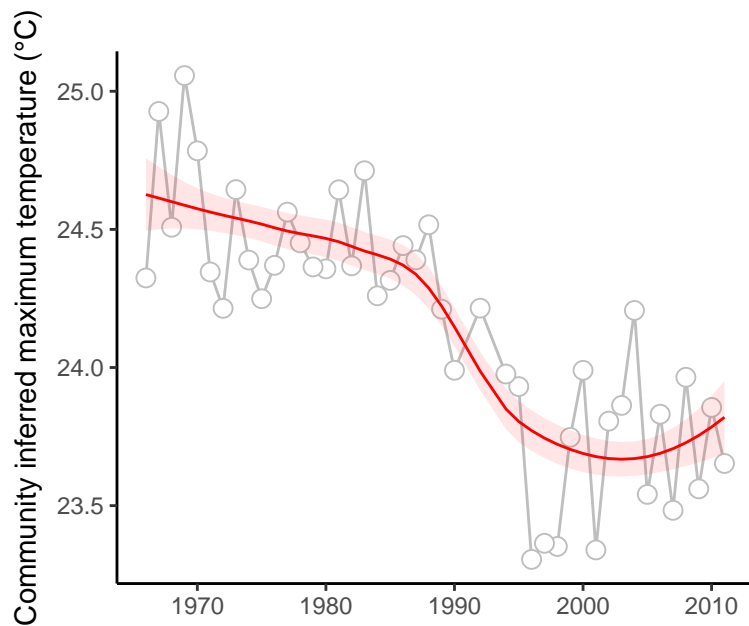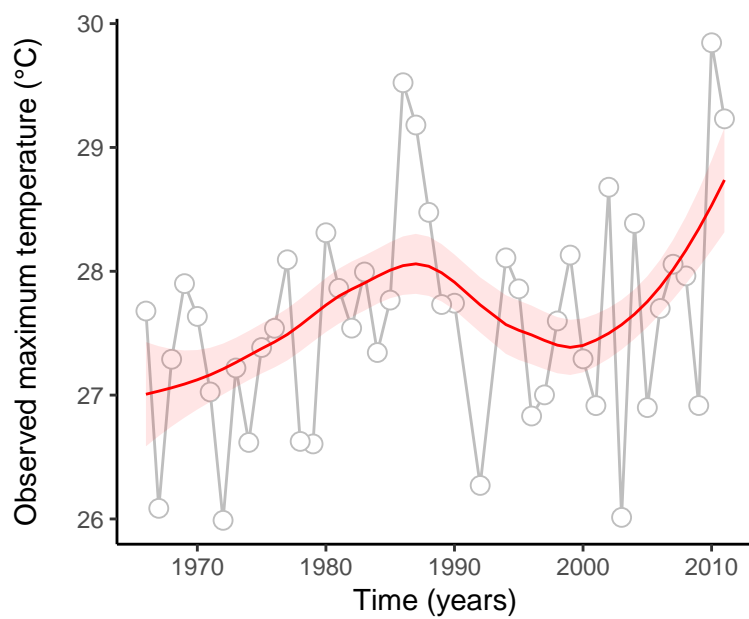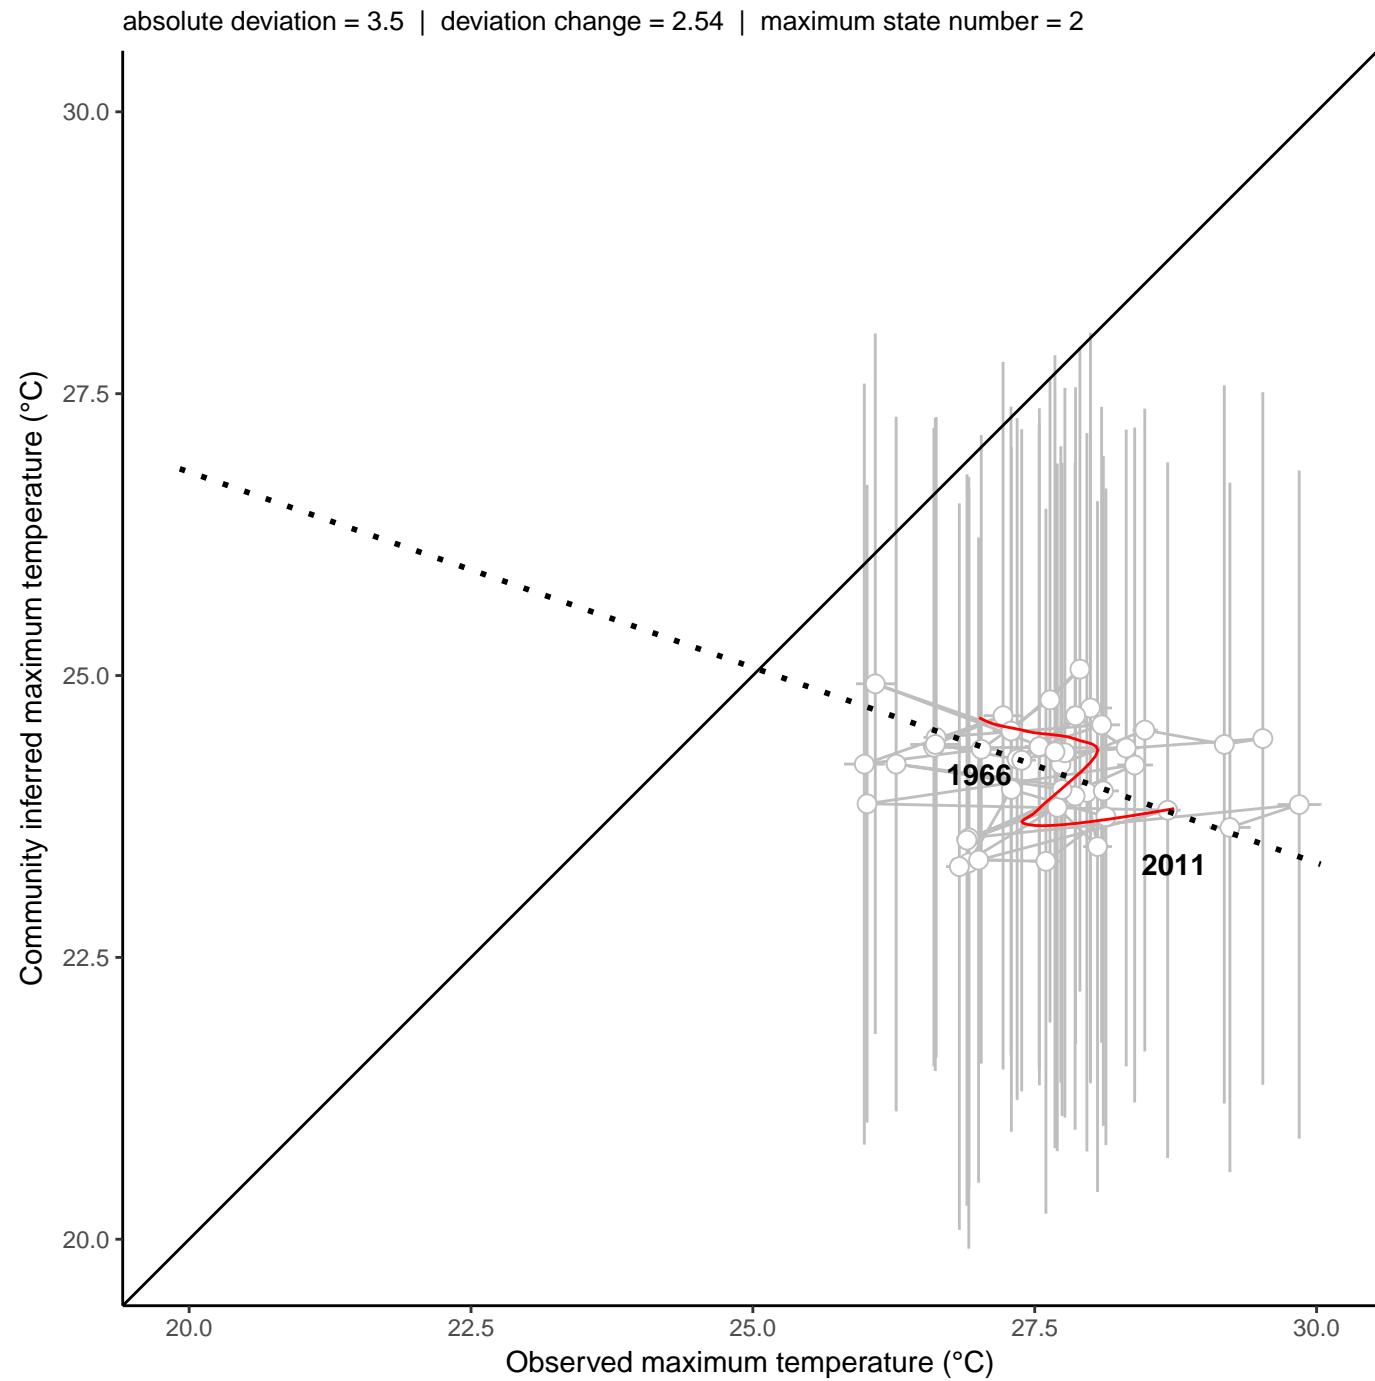

site : 840\_47\_14

absolute deviation = 0.66 | deviation change = 0.44 | maximum state number = 1

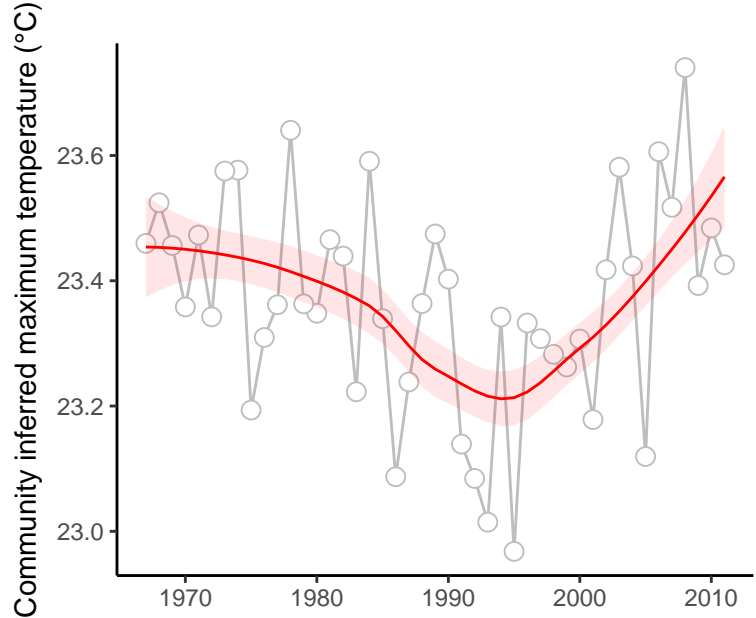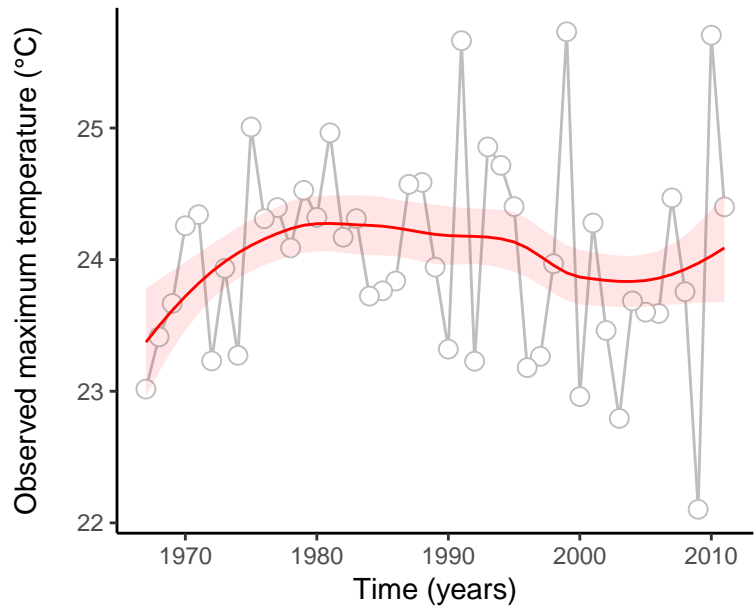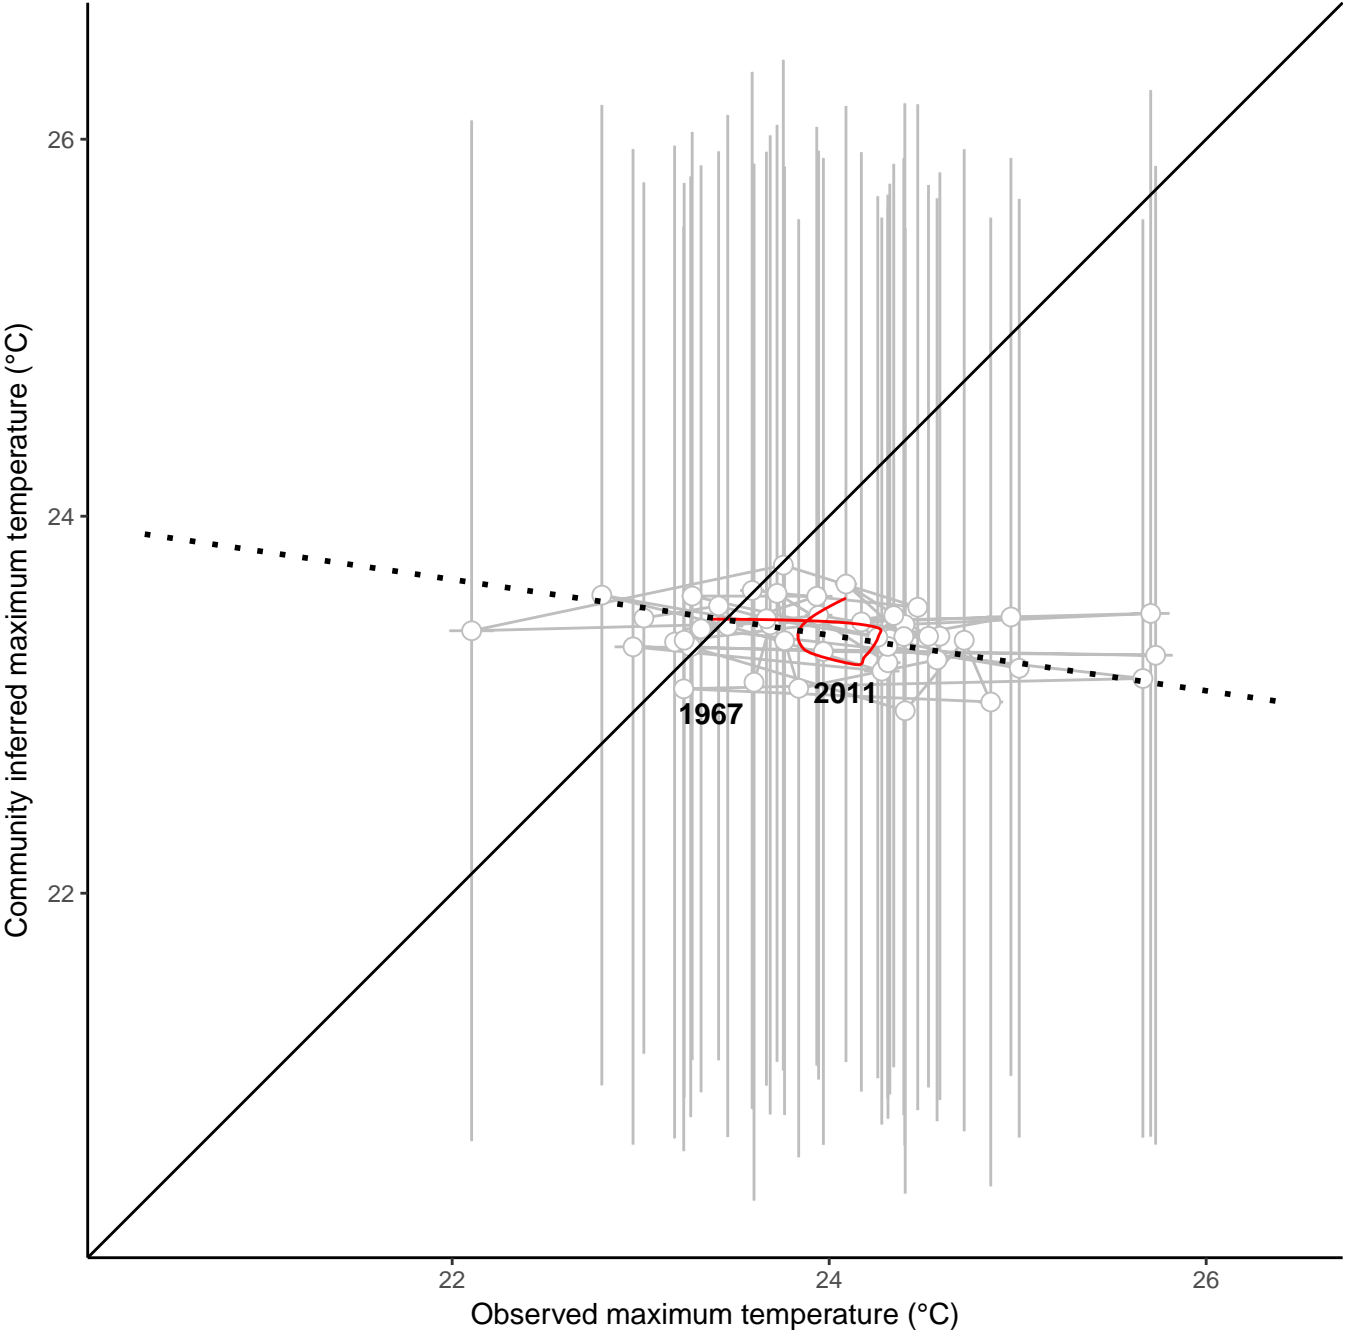

site : 840\_69\_3

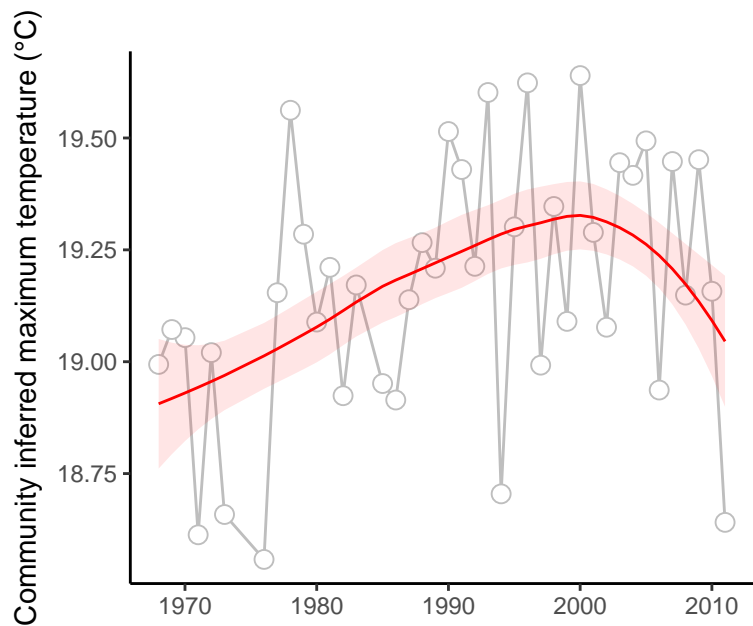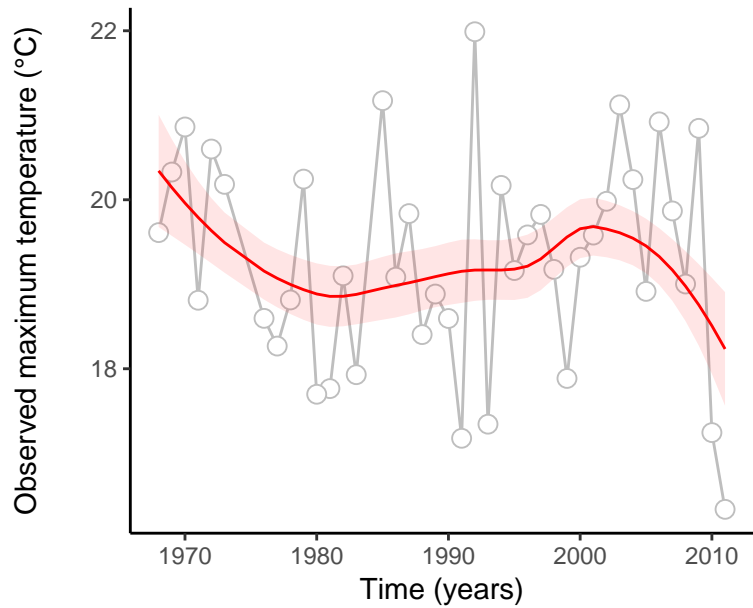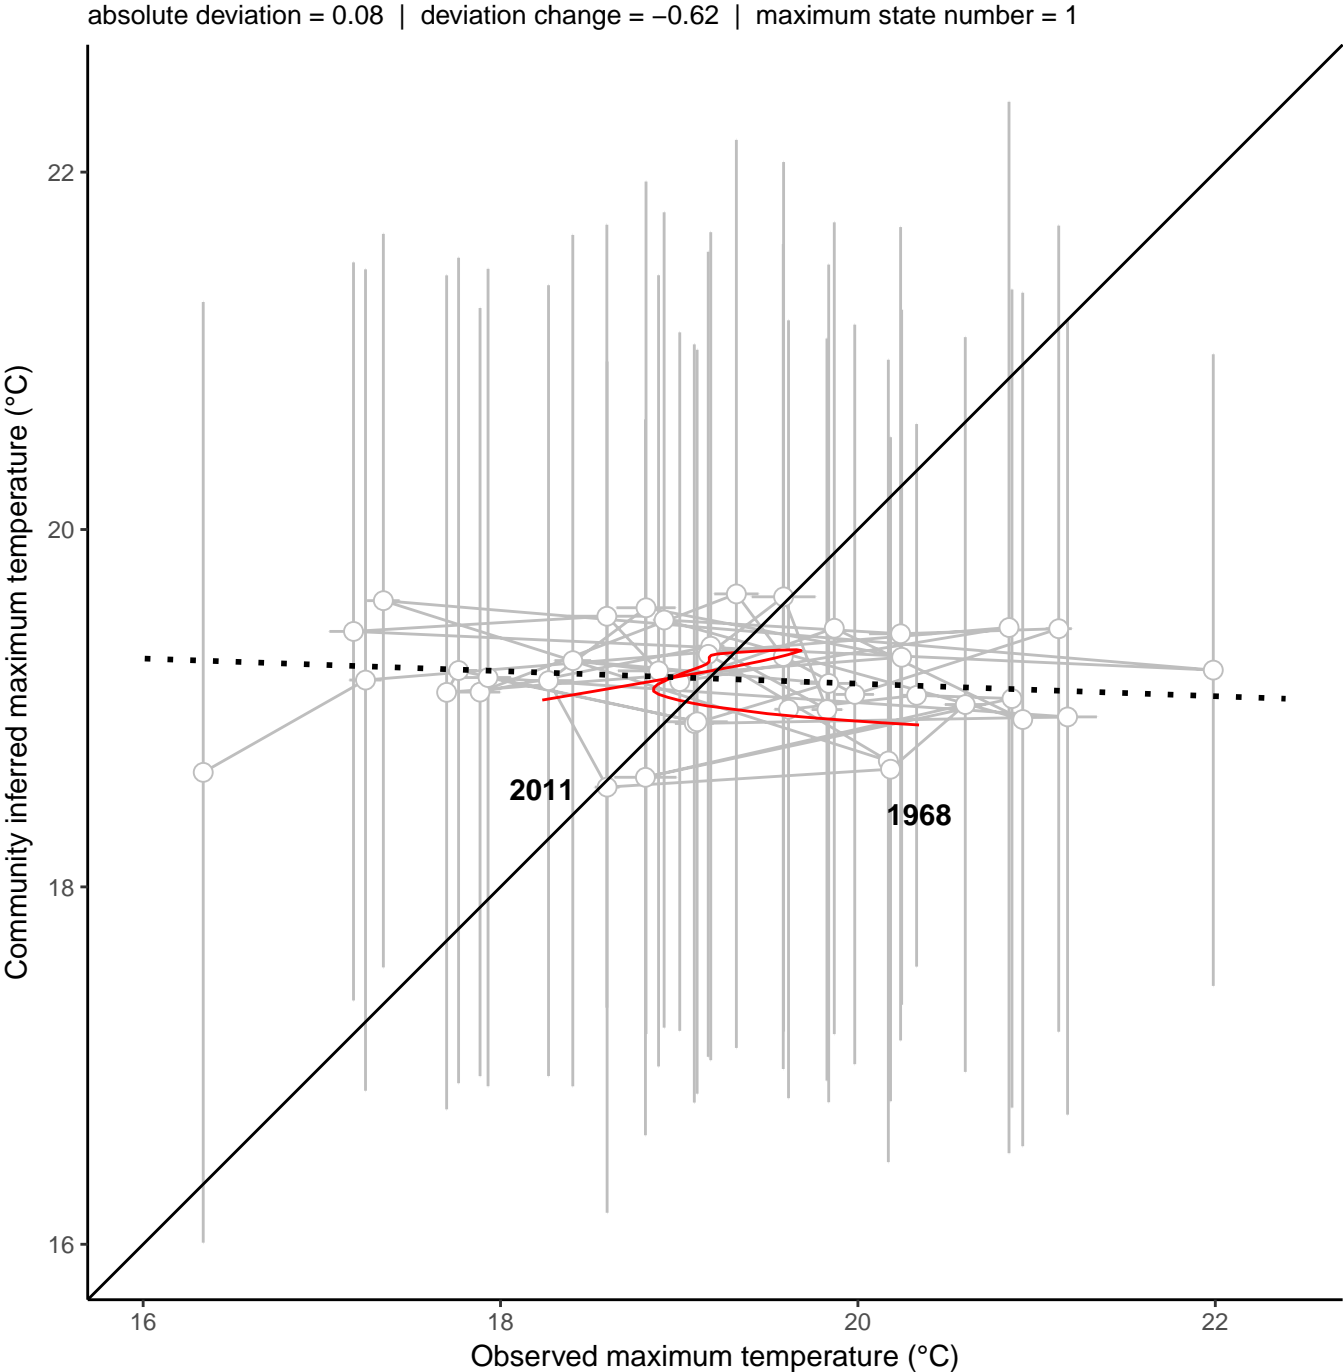



site : 840\_83\_52

absolute deviation = 4.89 | deviation change = 0.71 | maximum state number = 1

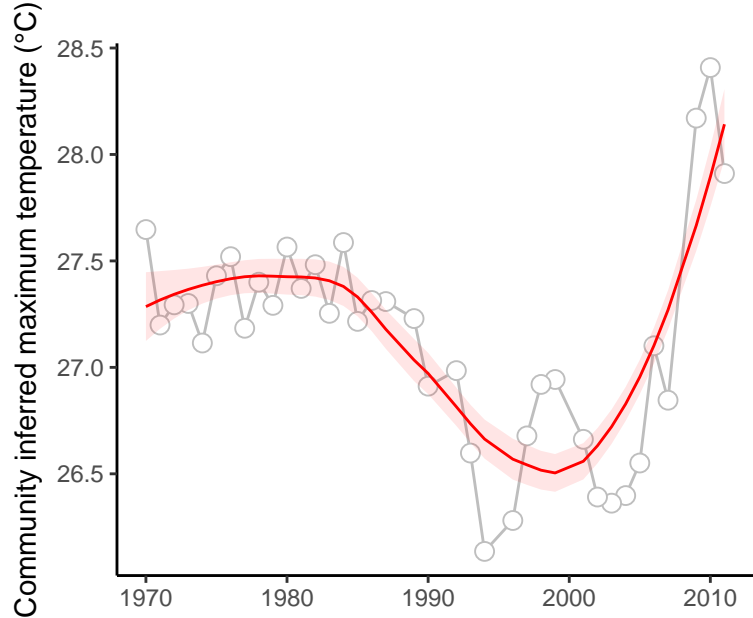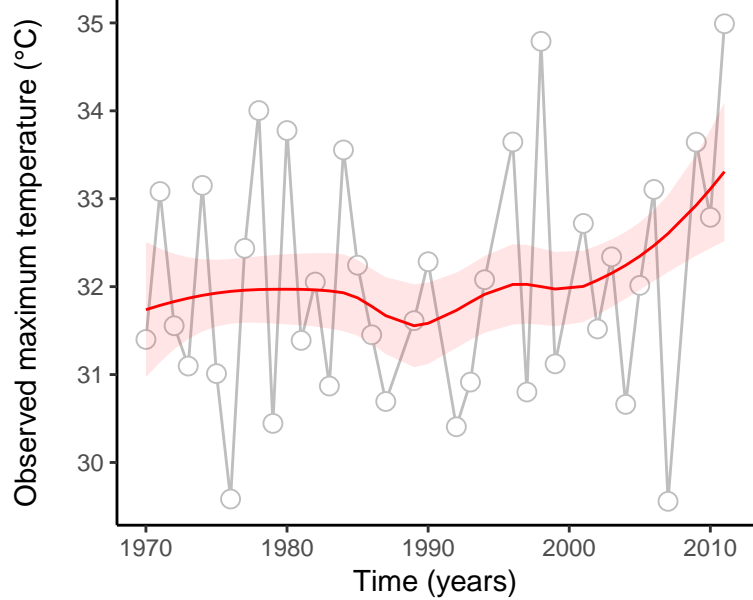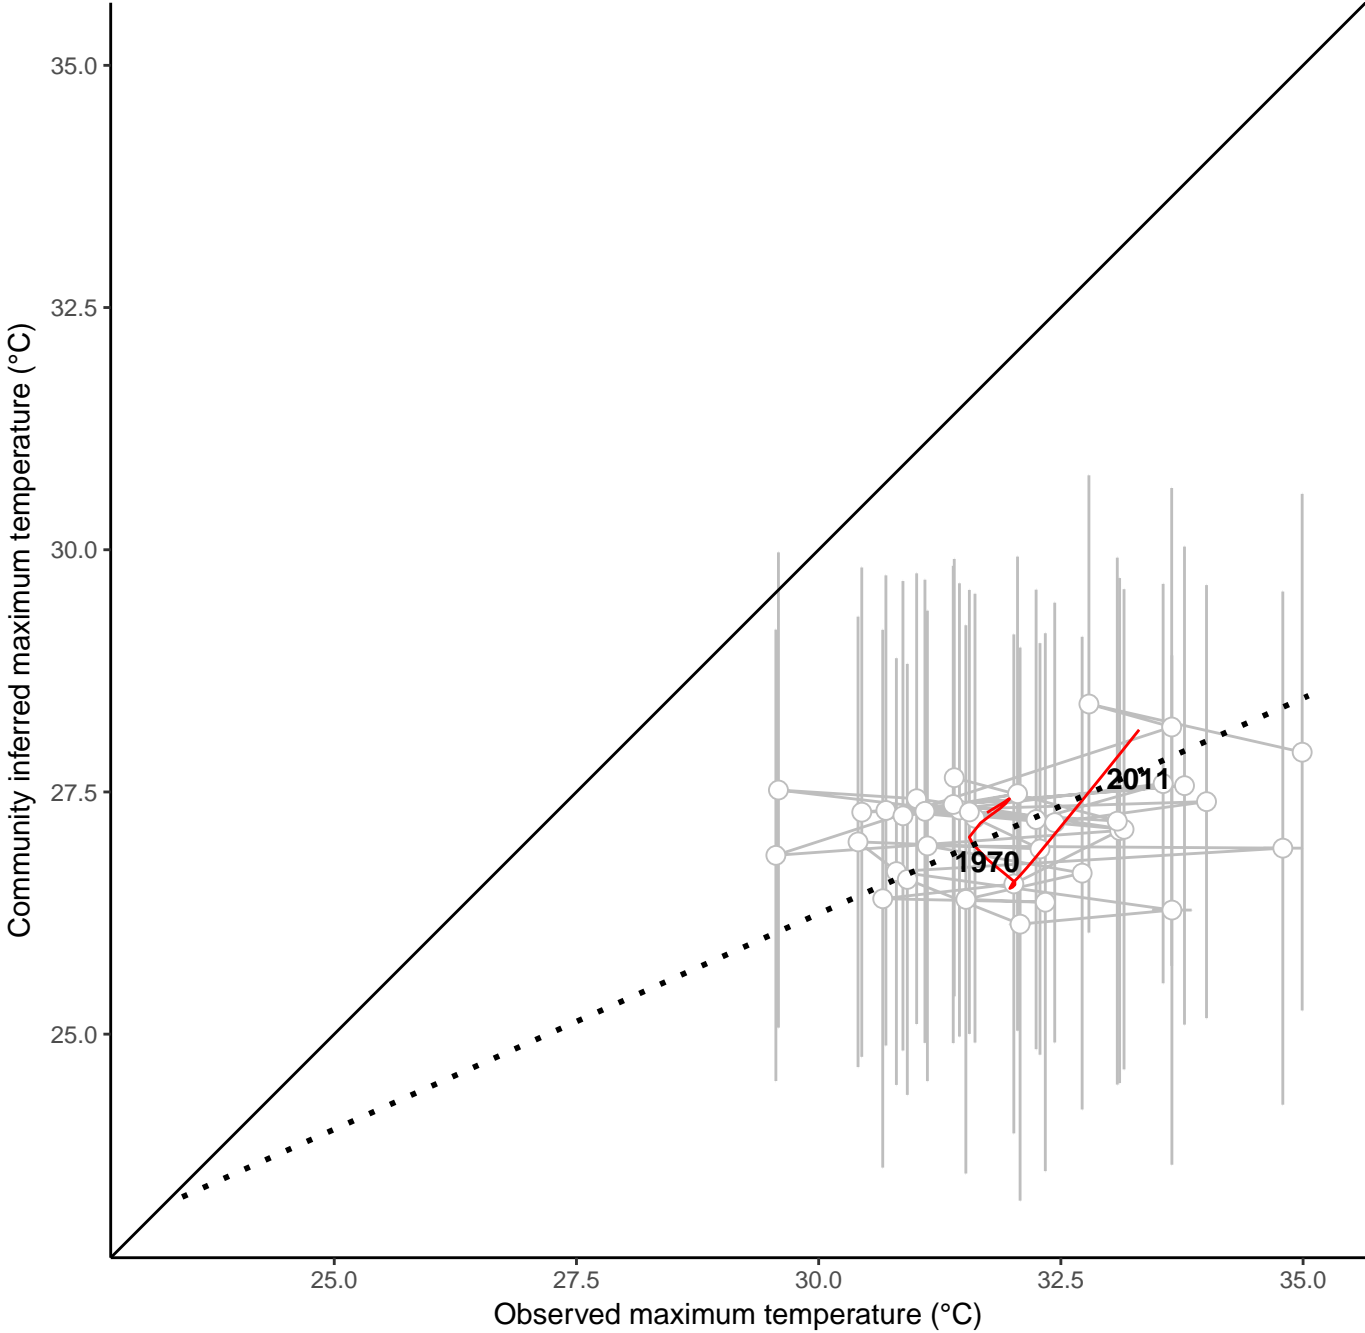

site : 840\_83\_63

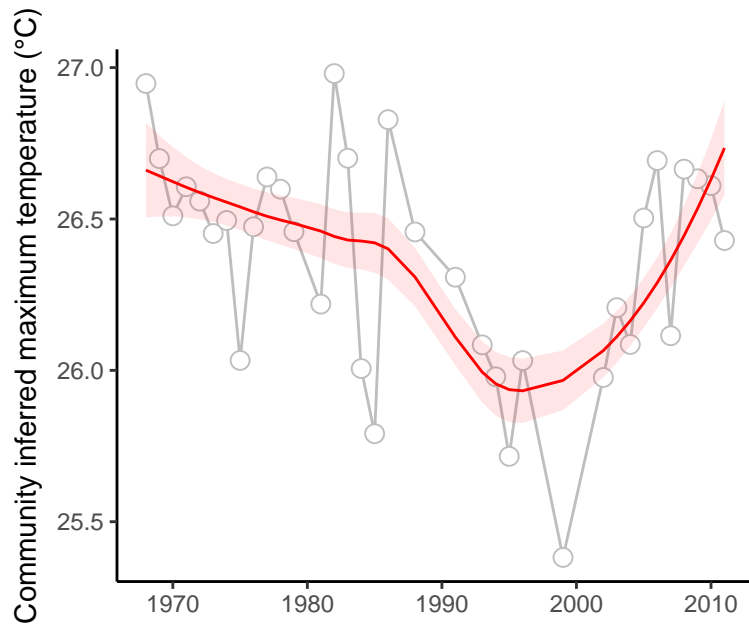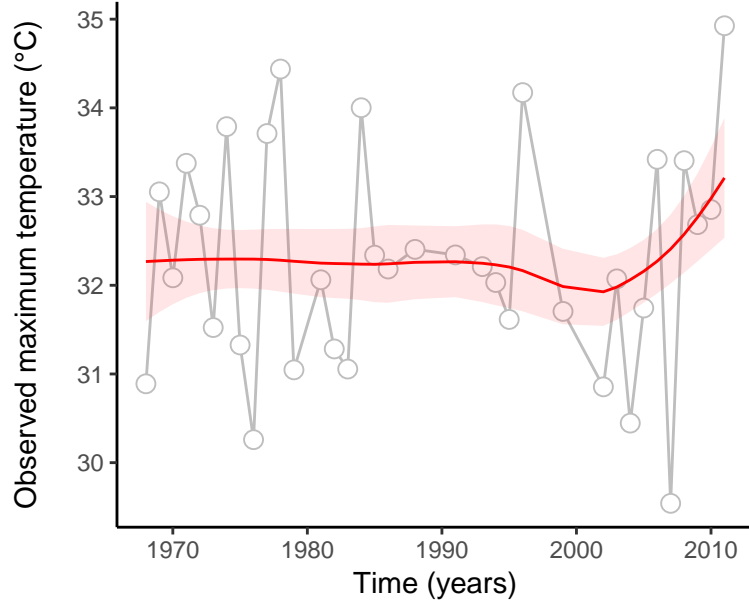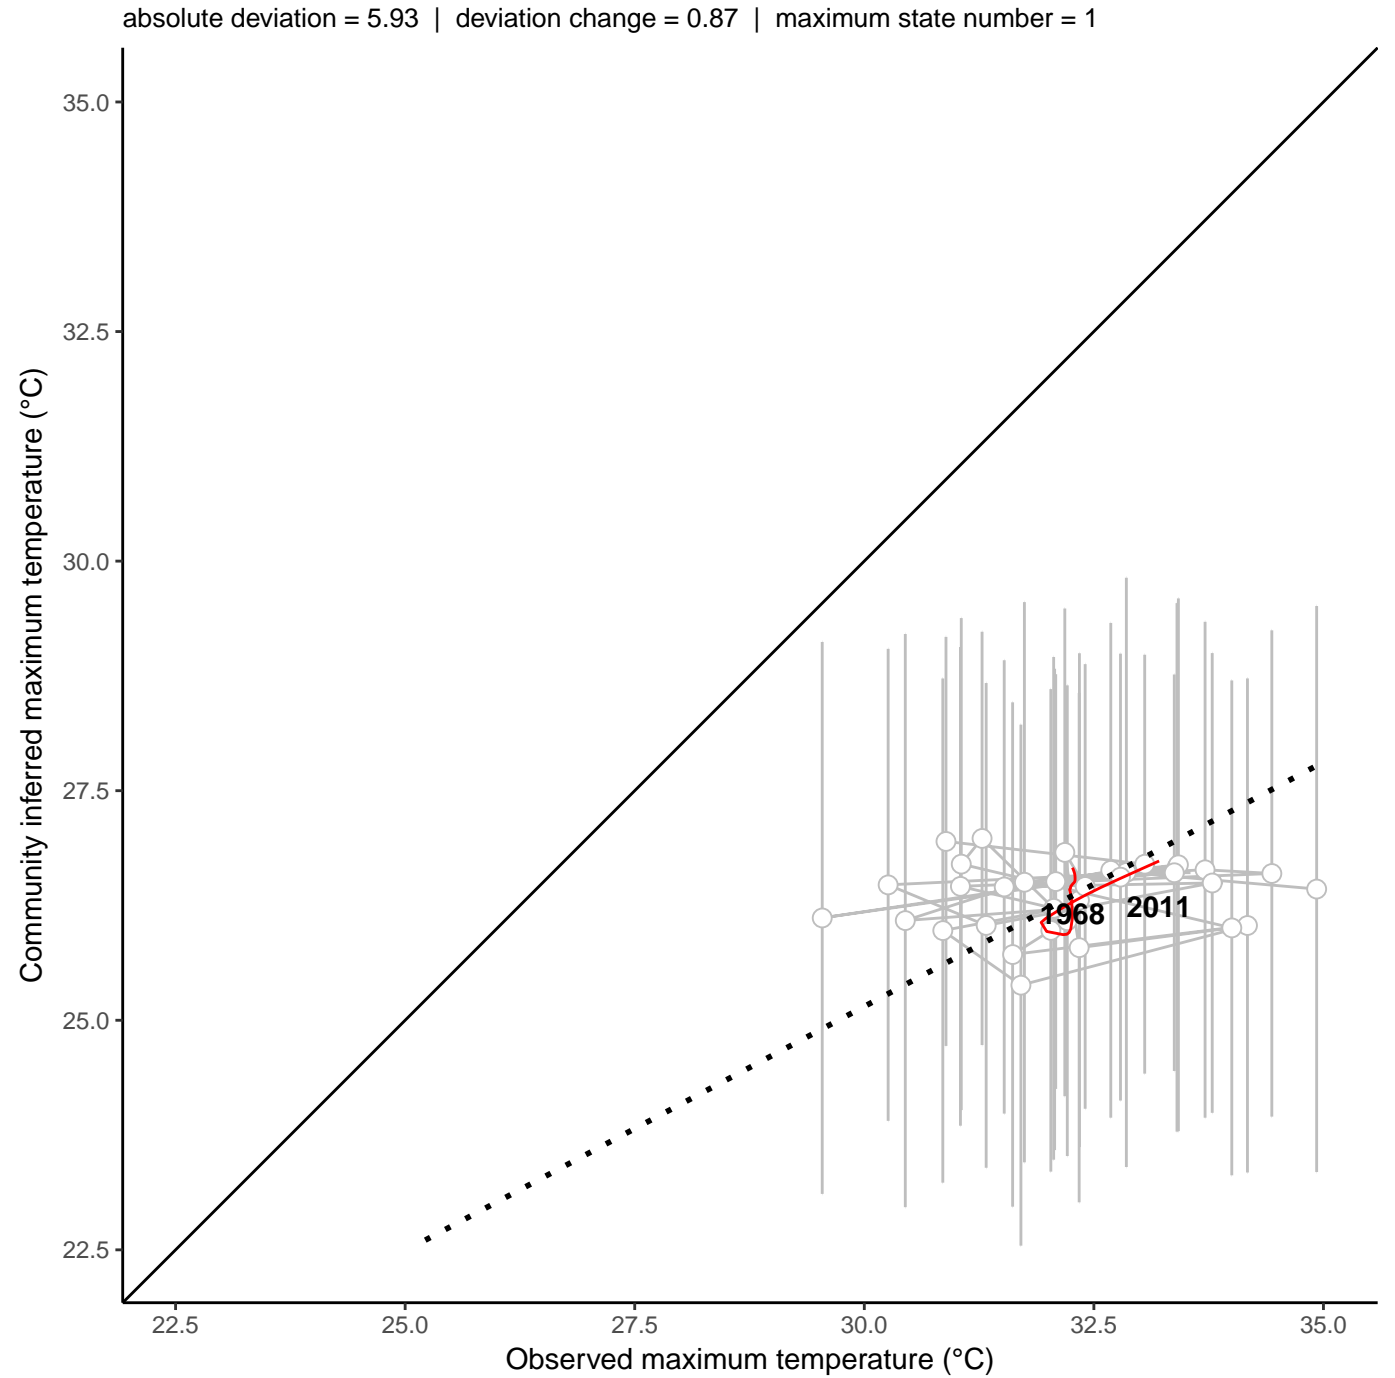

site : 840\_83\_71

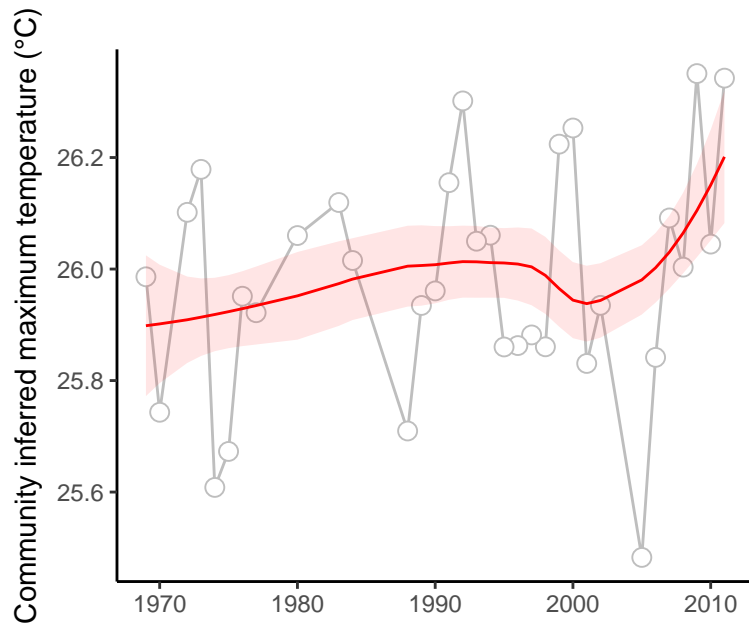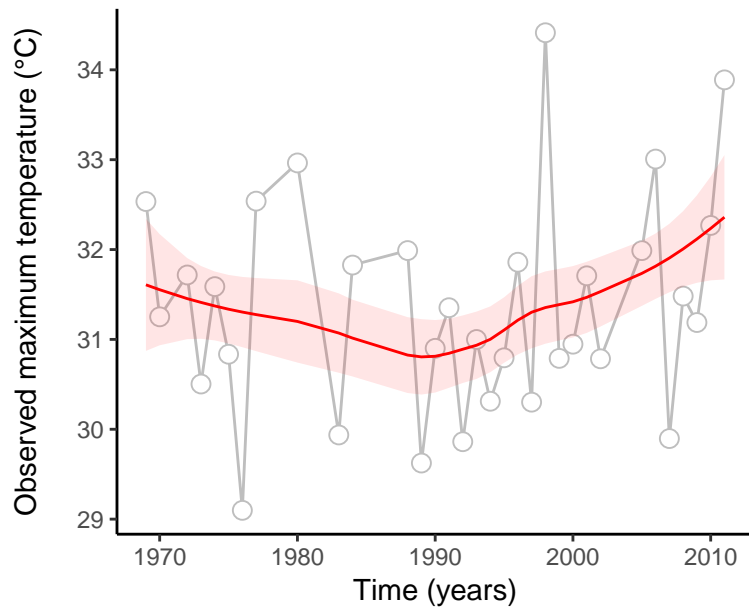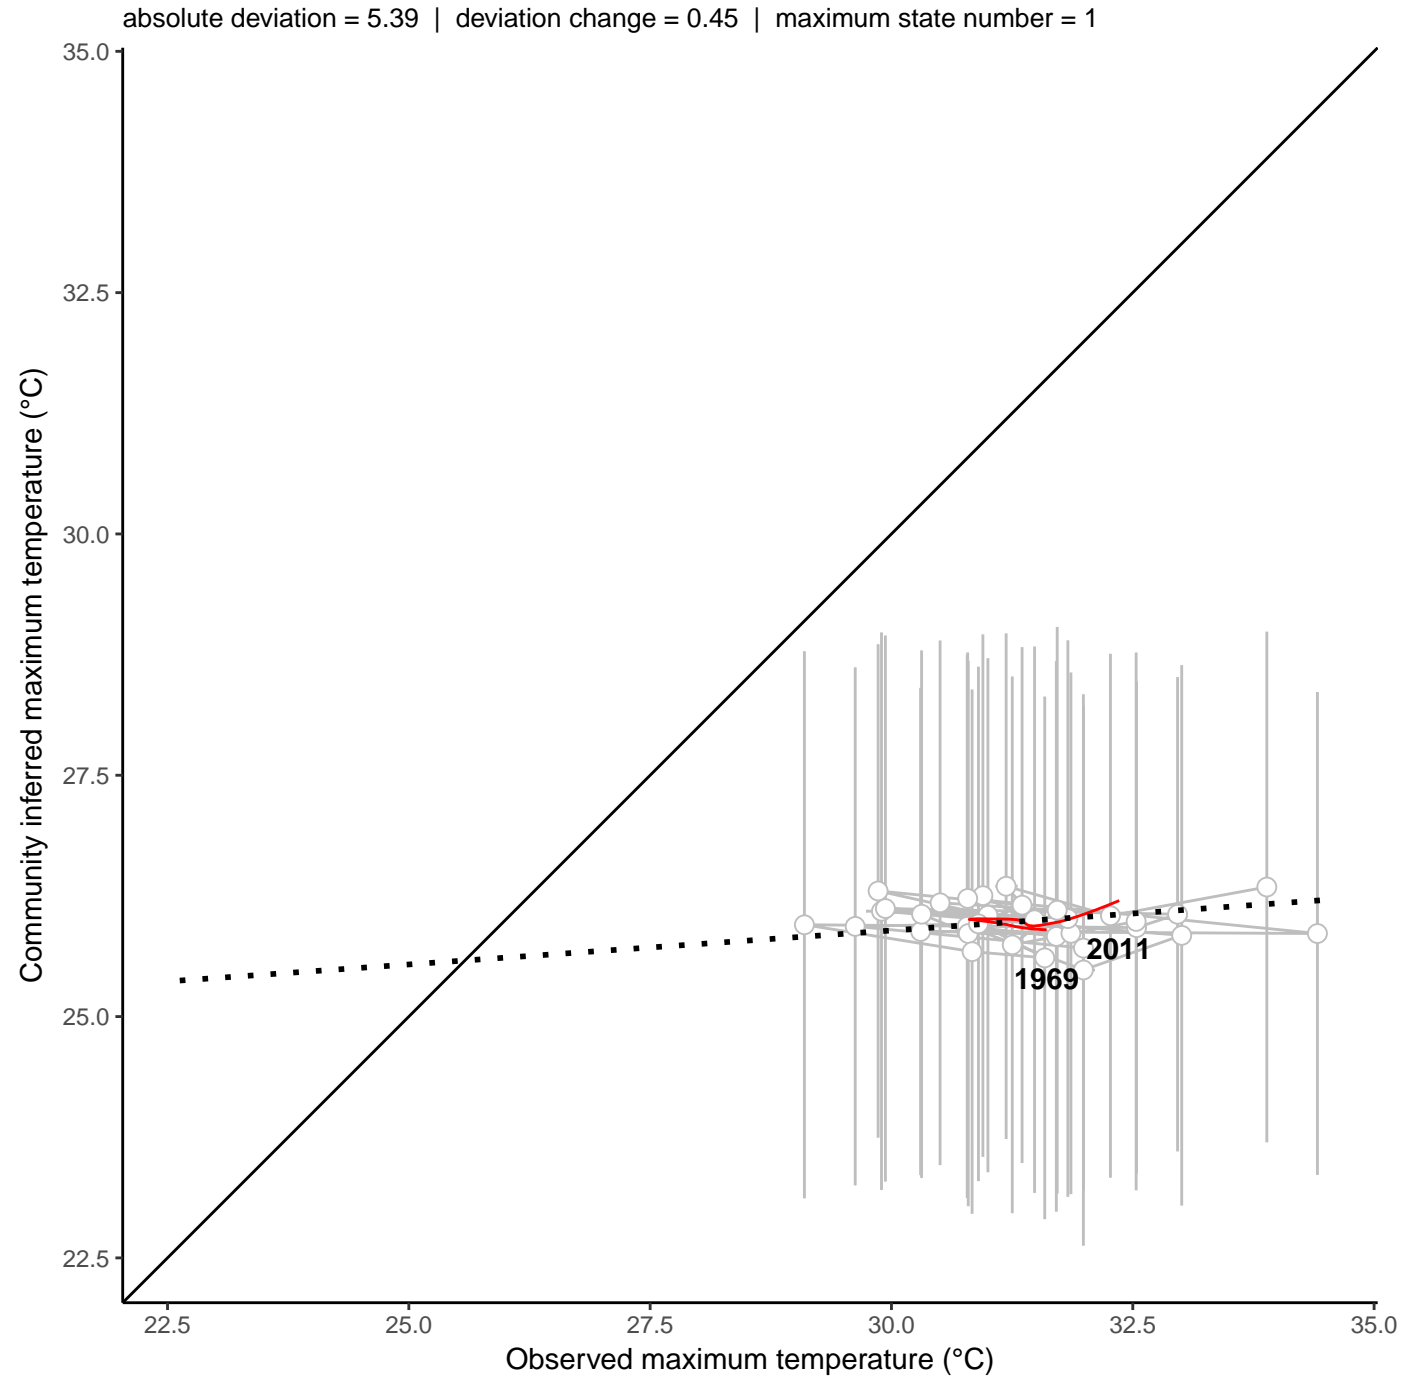

site : 840\_88\_13

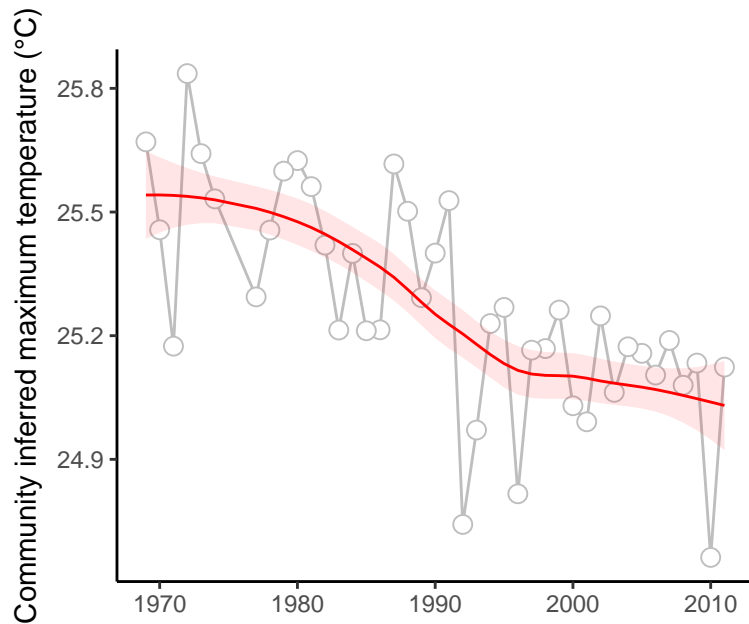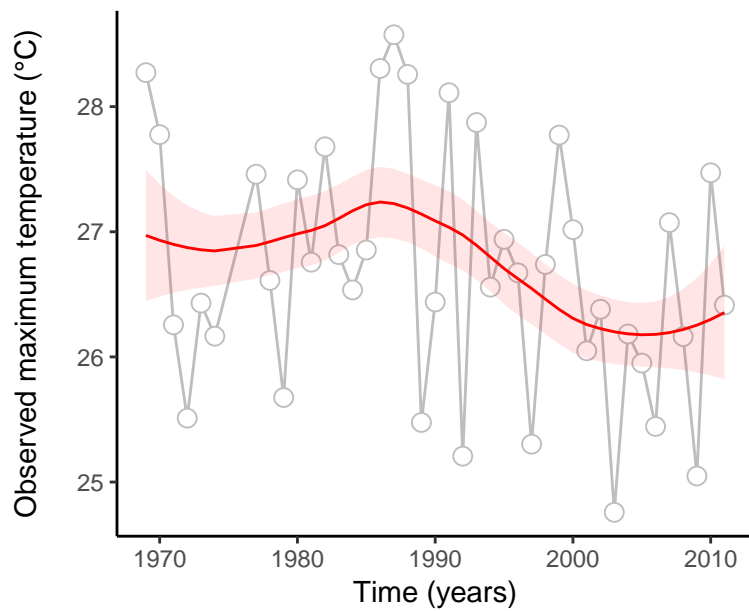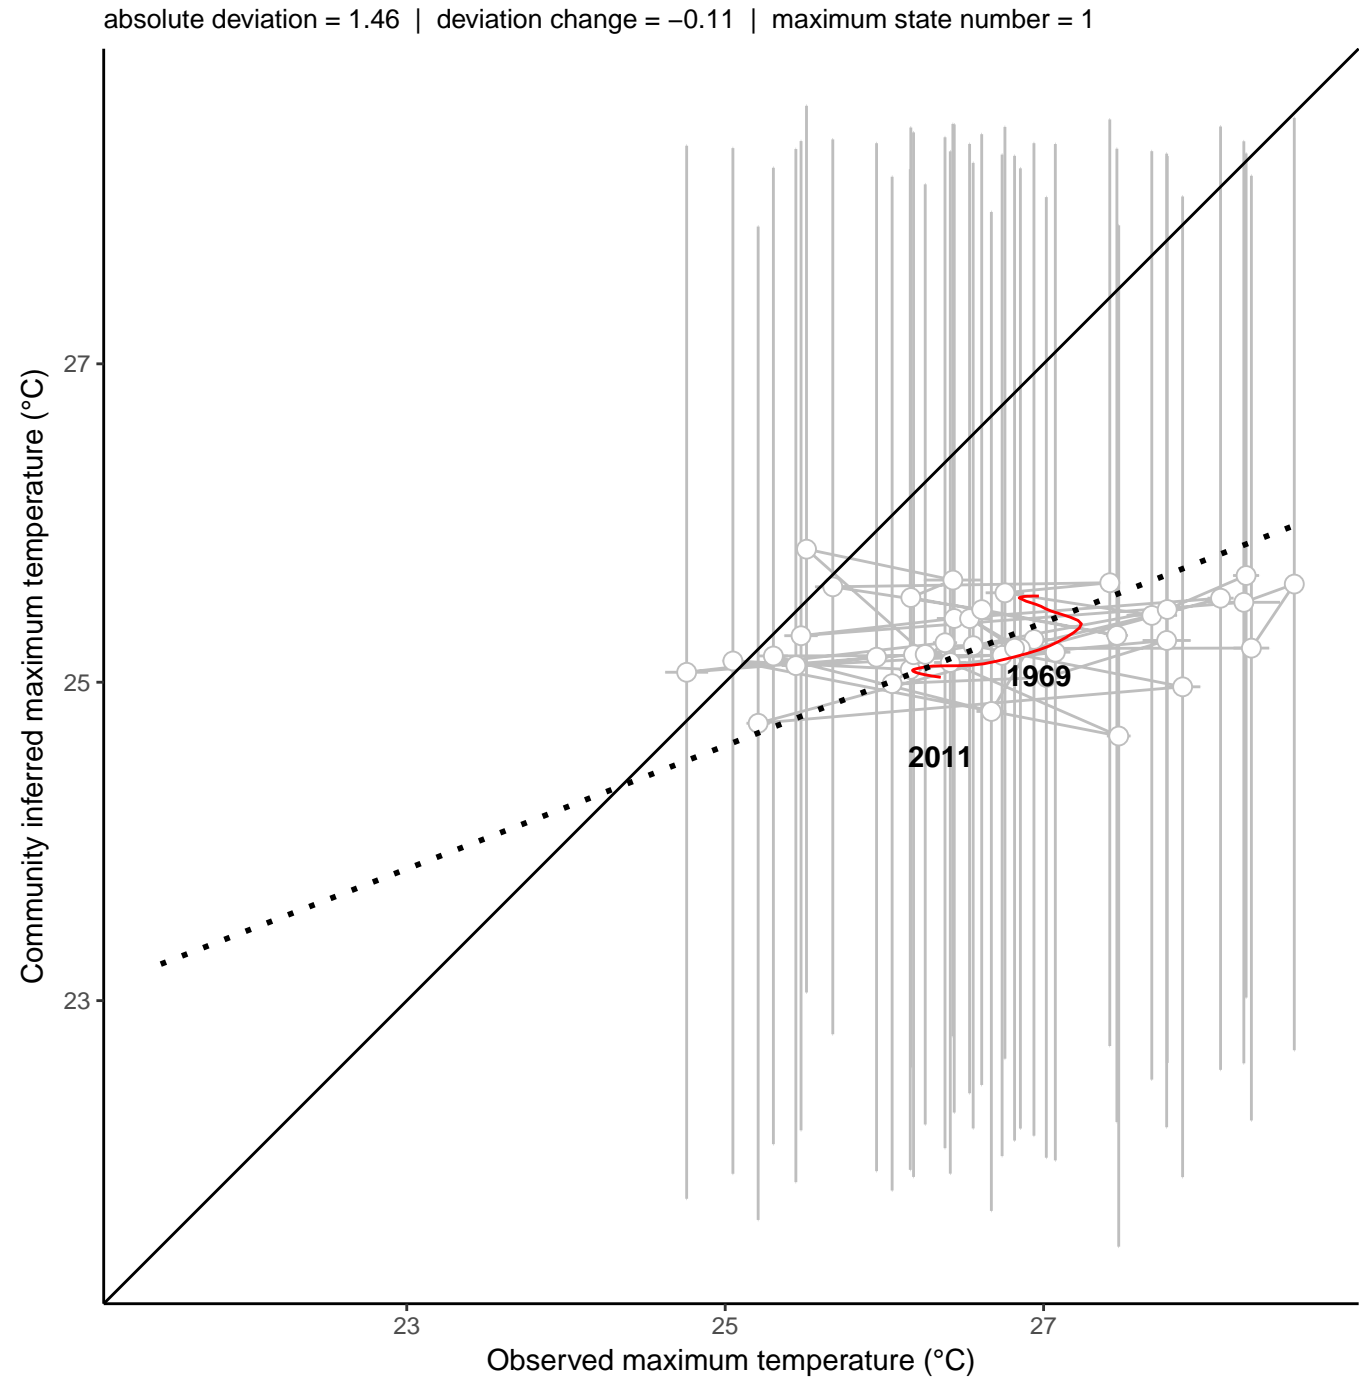

site : 840\_2\_20

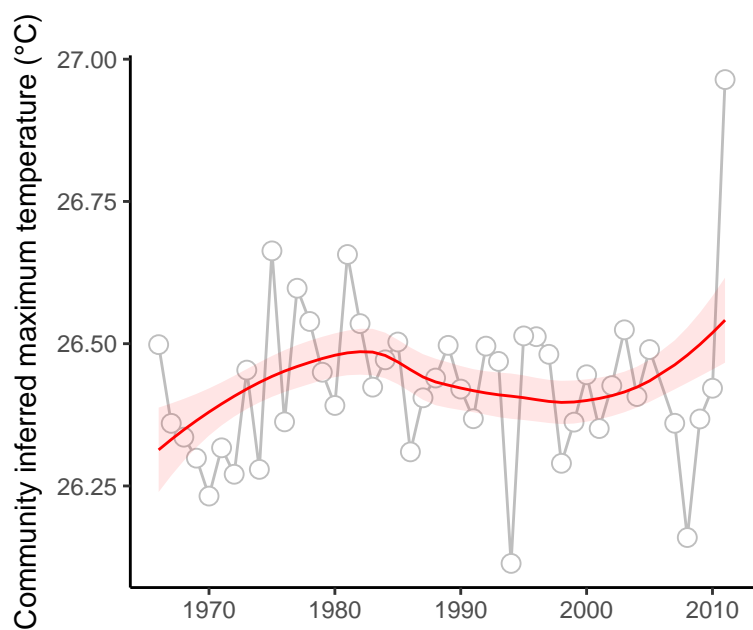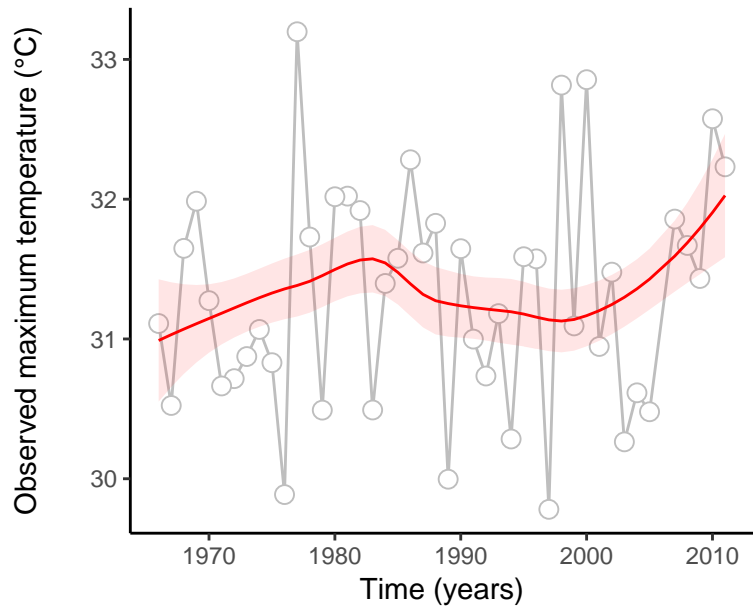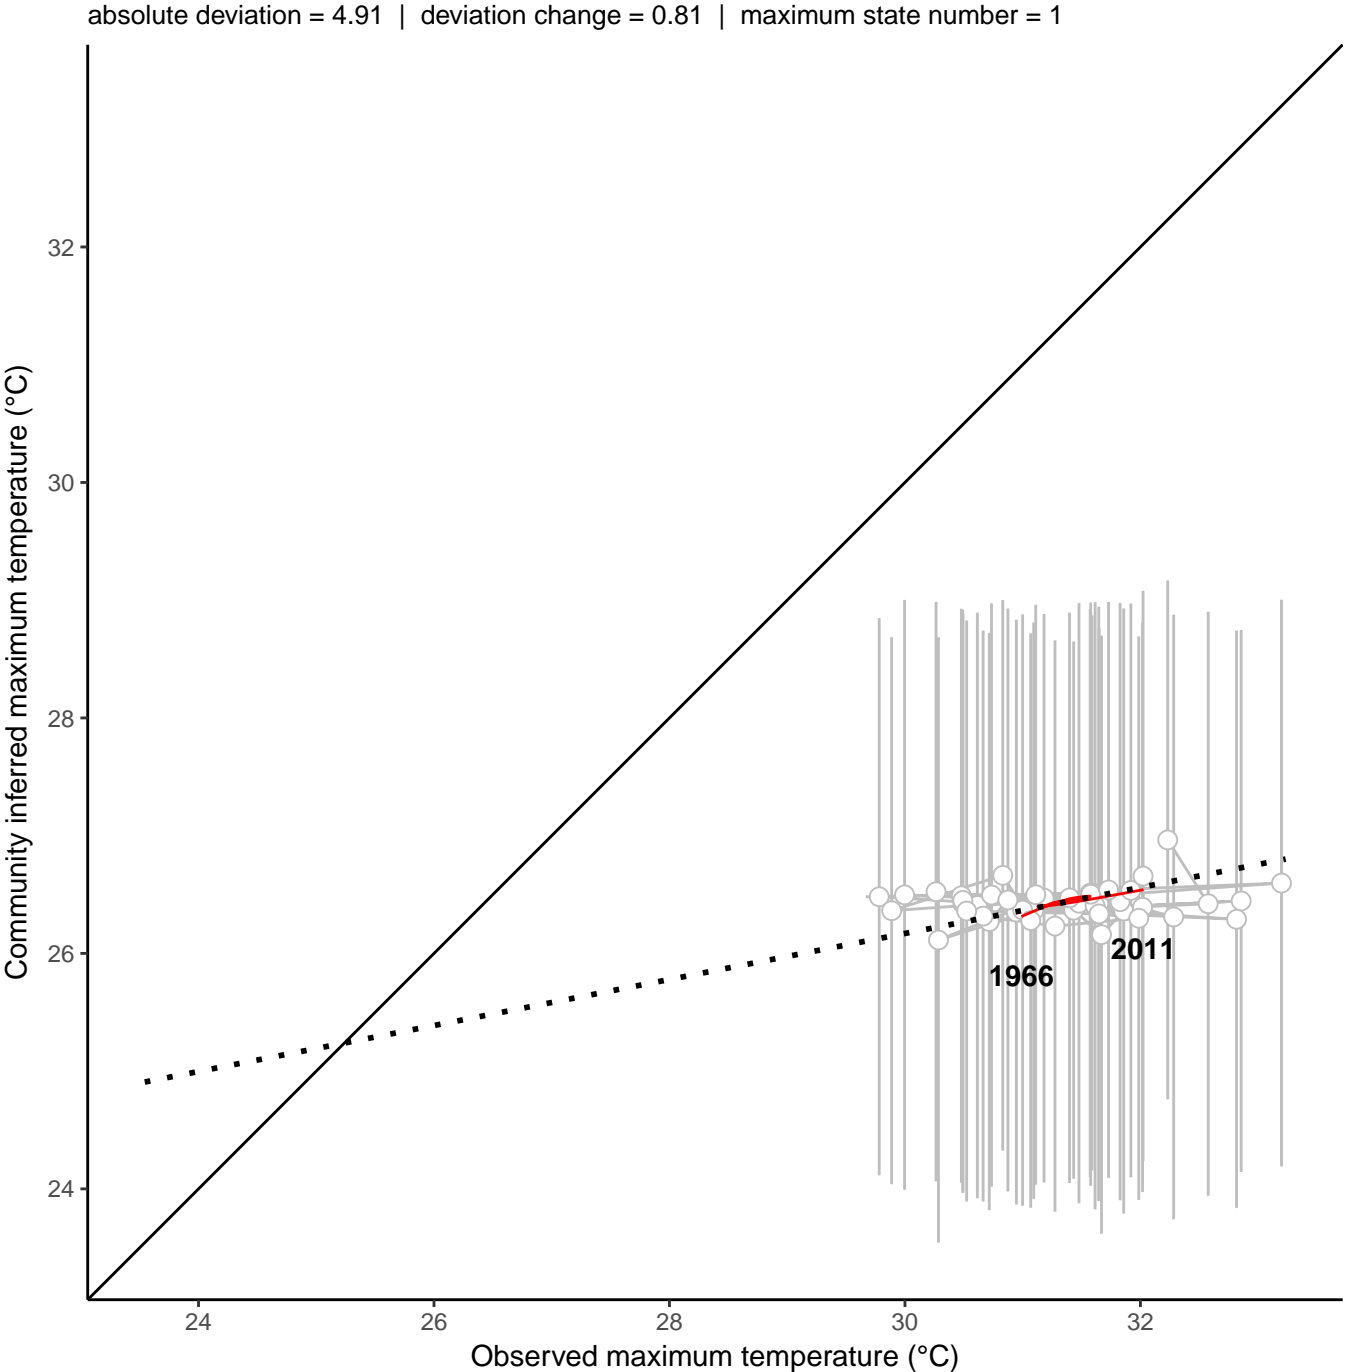

site : 840\_34\_17

absolute deviation = 3.41 | deviation change = 0.47 | maximum state number = 1

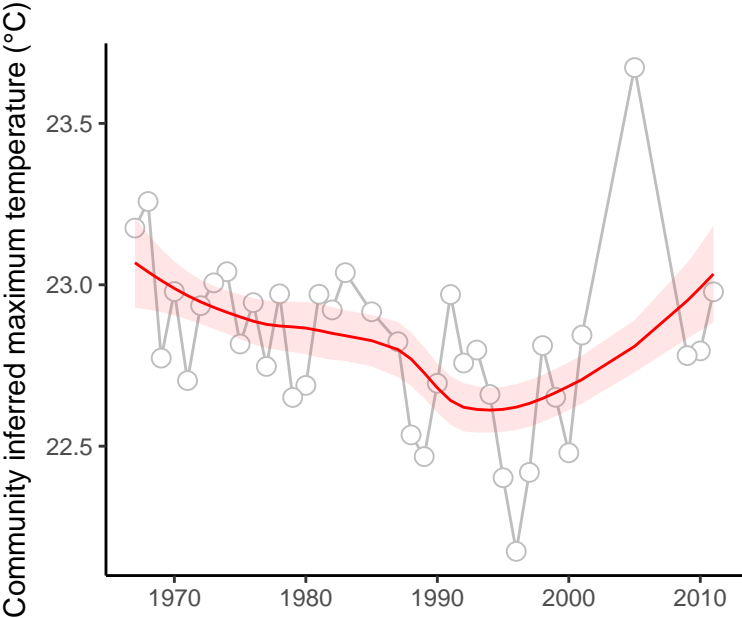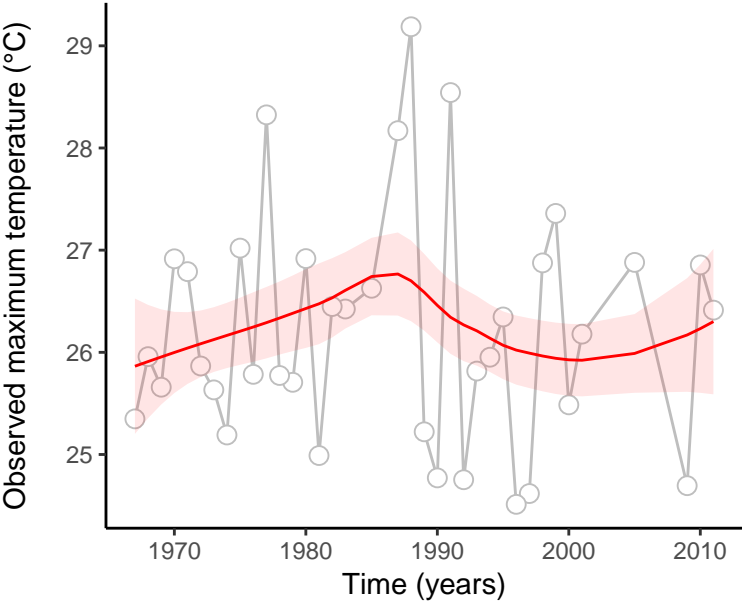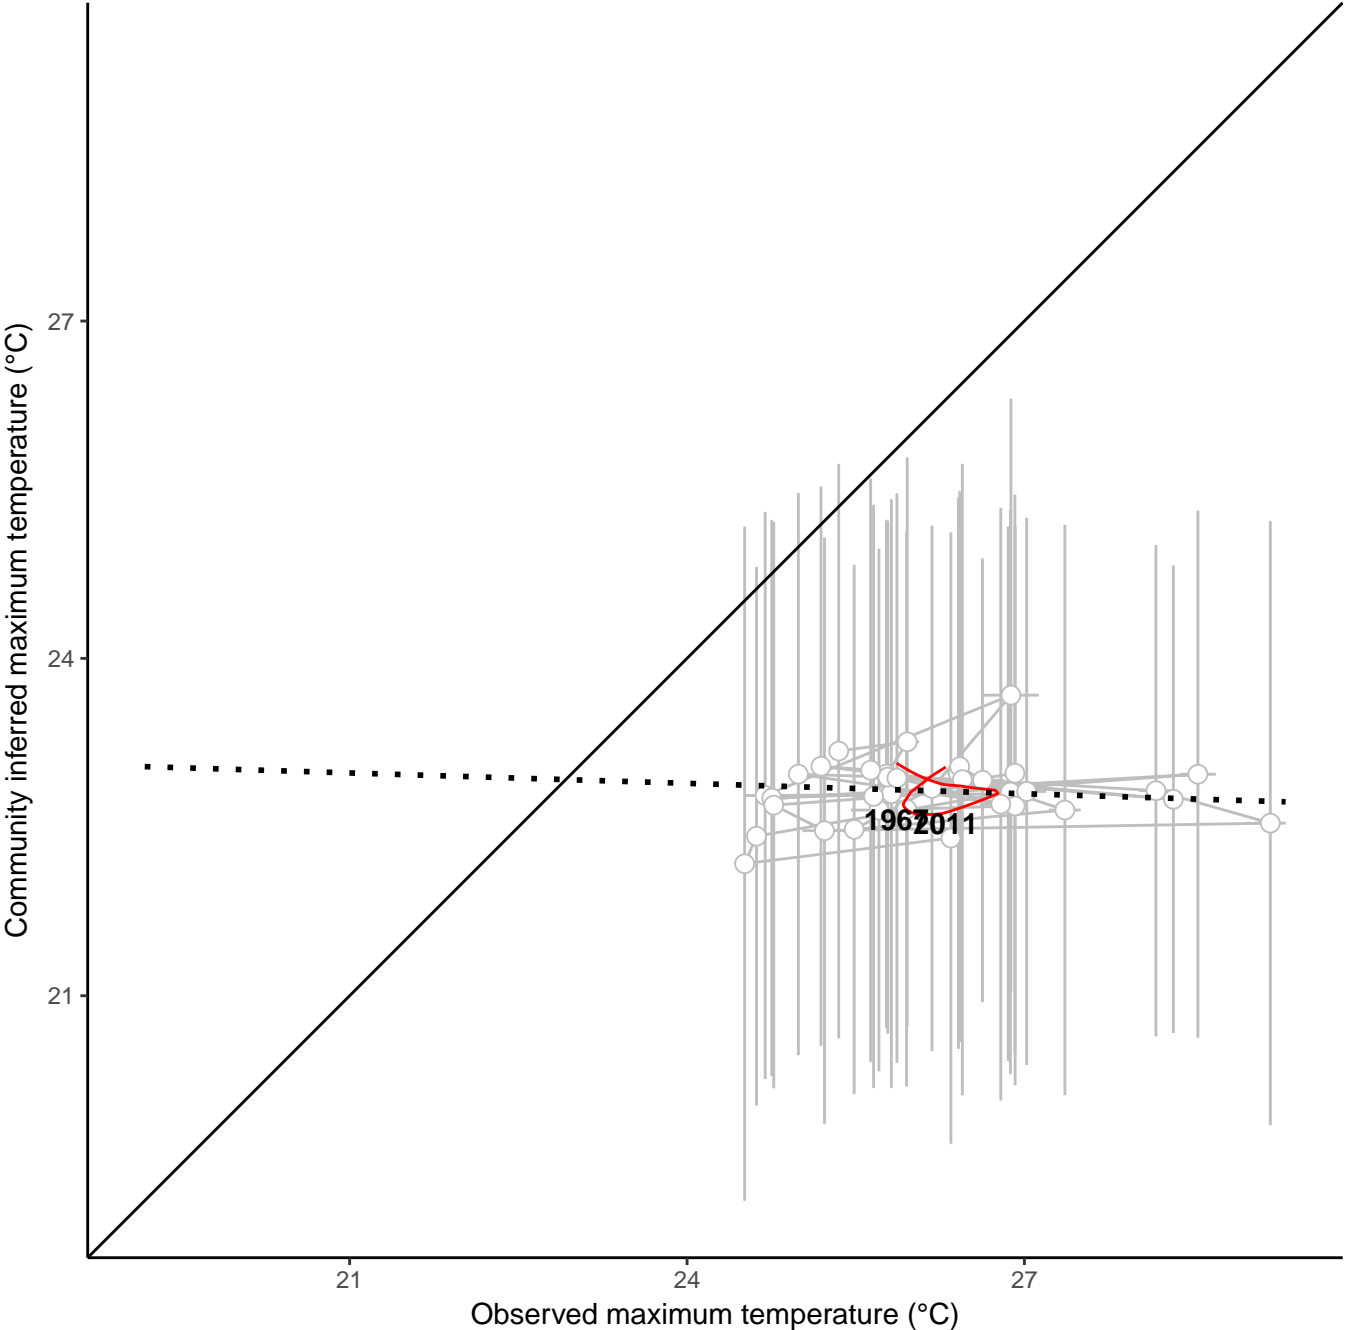

site : 840\_58\_13

absolute deviation = 0.57 | deviation change = -0.04 | maximum state number = 1

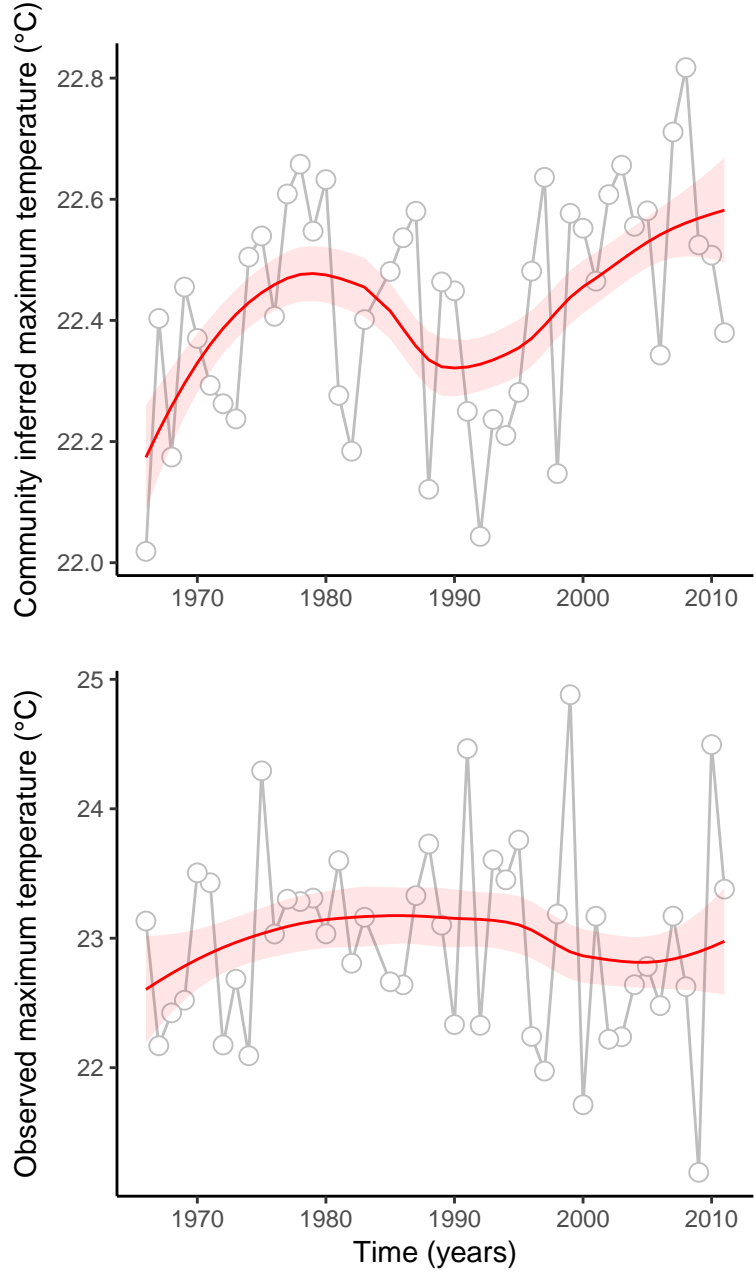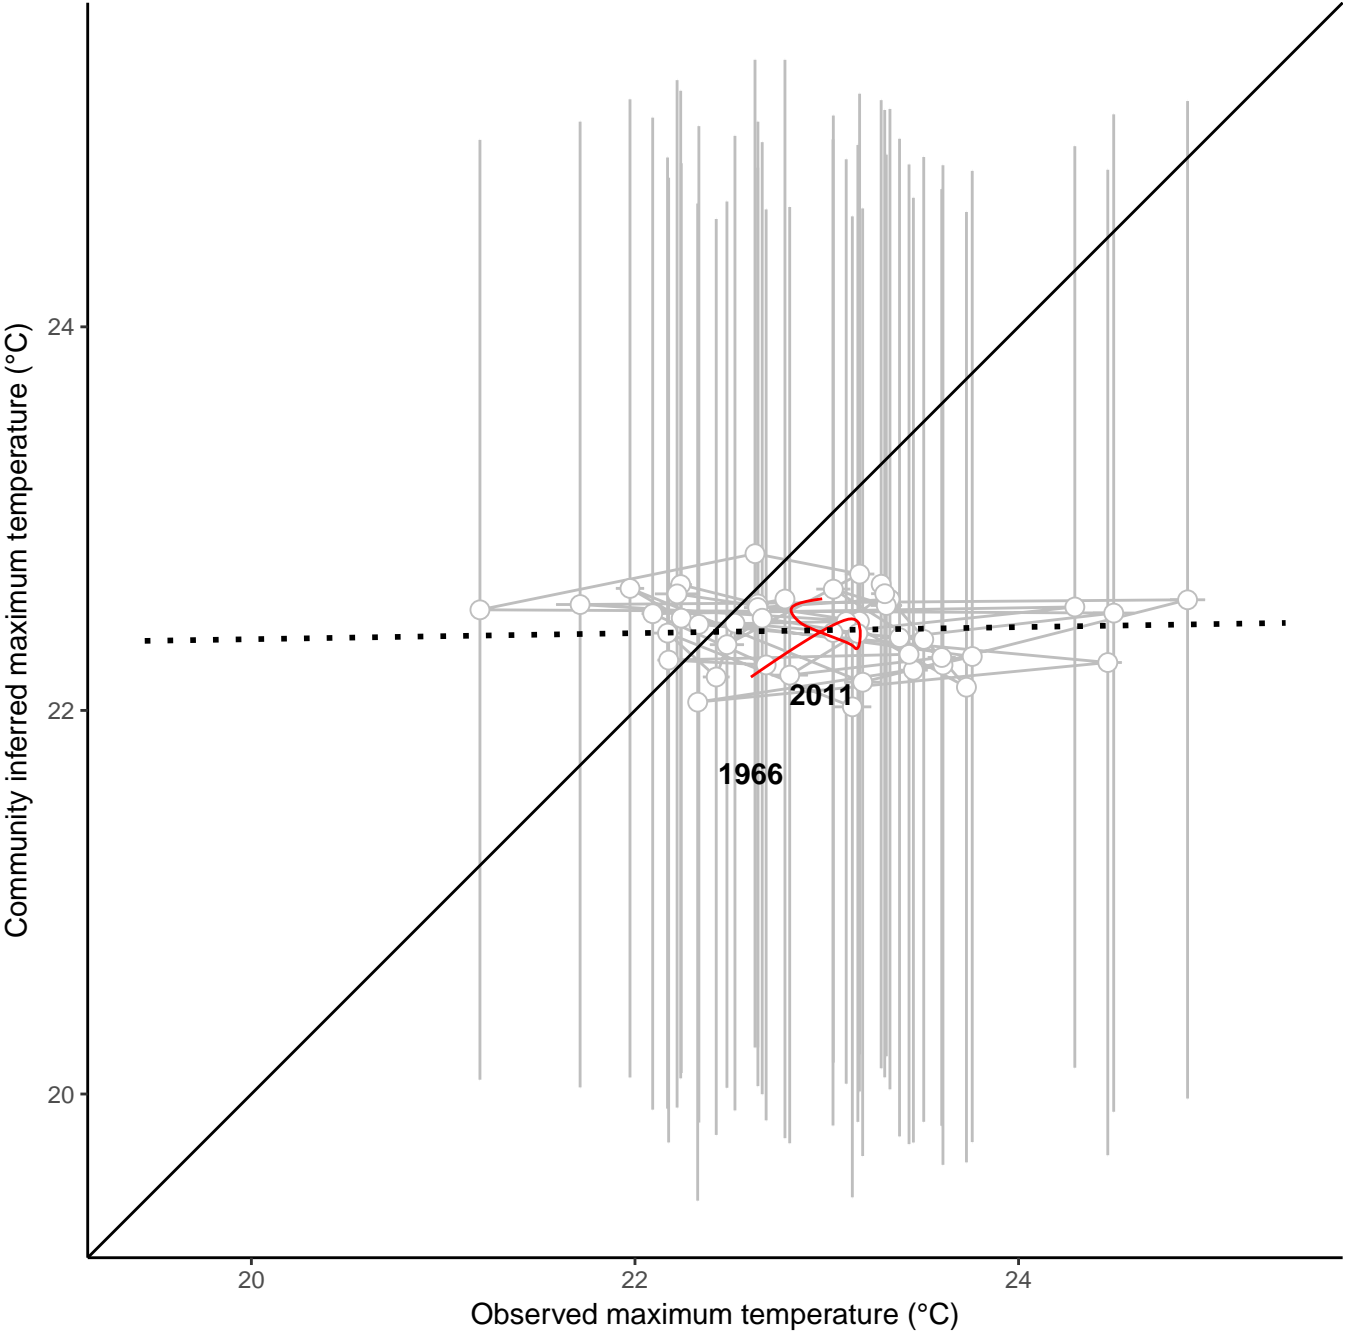

site : 840\_87\_18

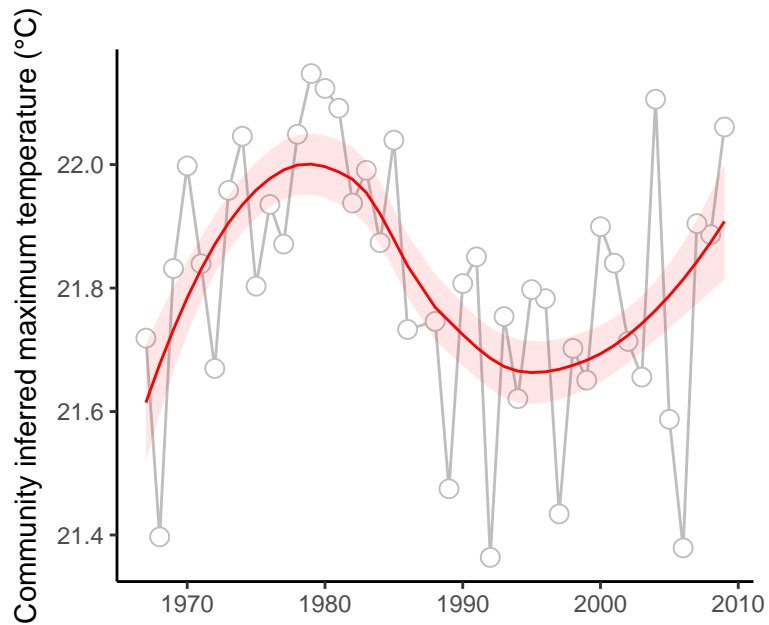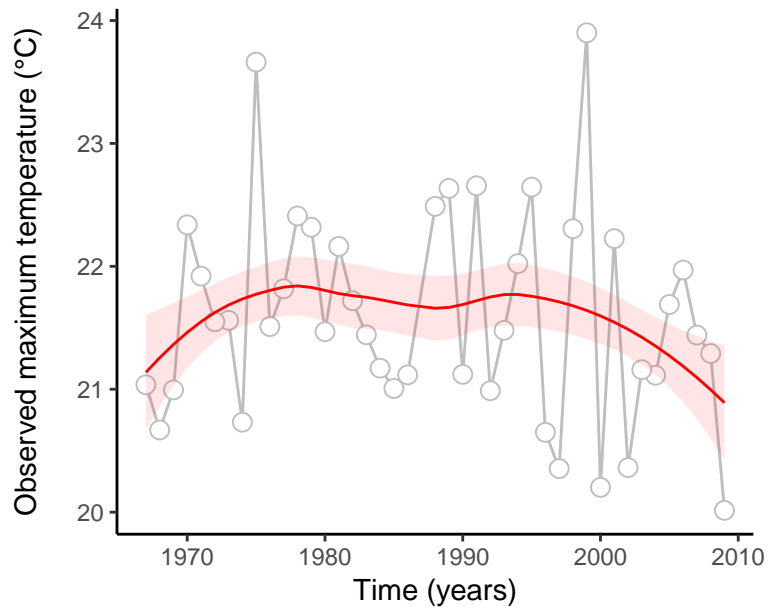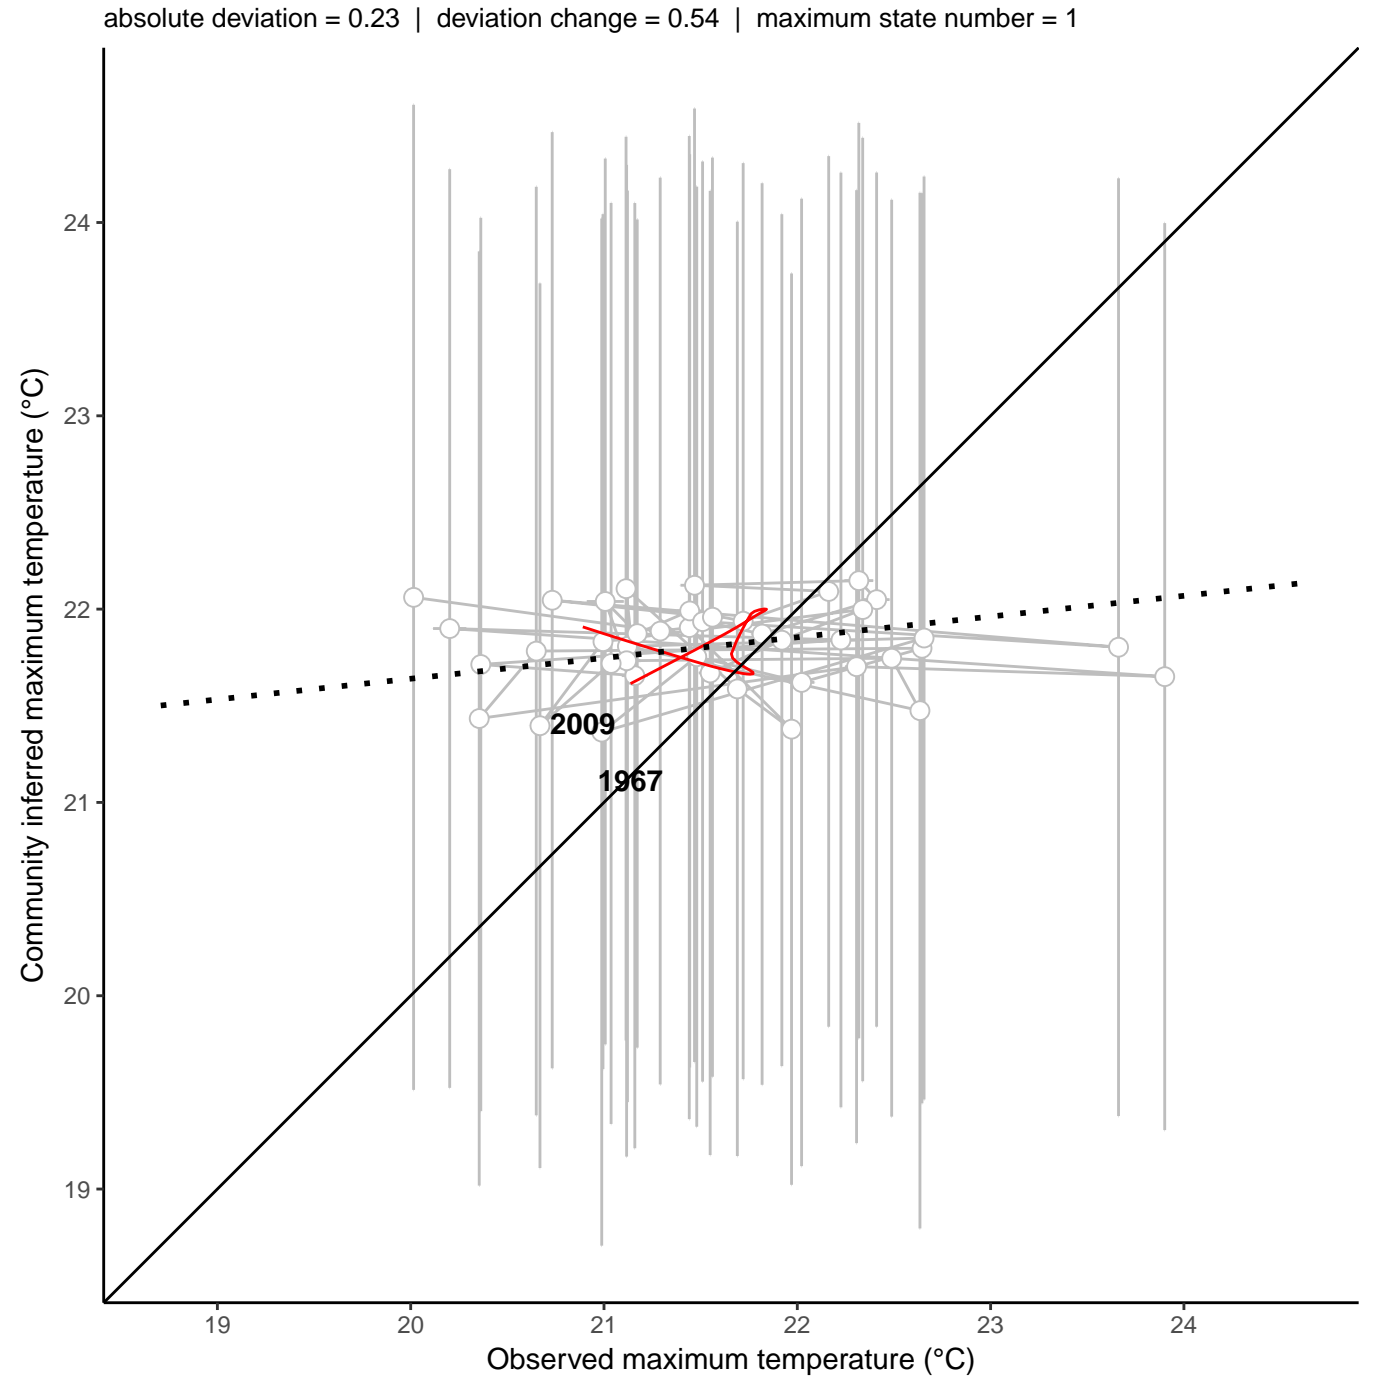



site : 840\_69\_28

absolute deviation = 0.15 | deviation change = 0.08 | maximum state number = 1

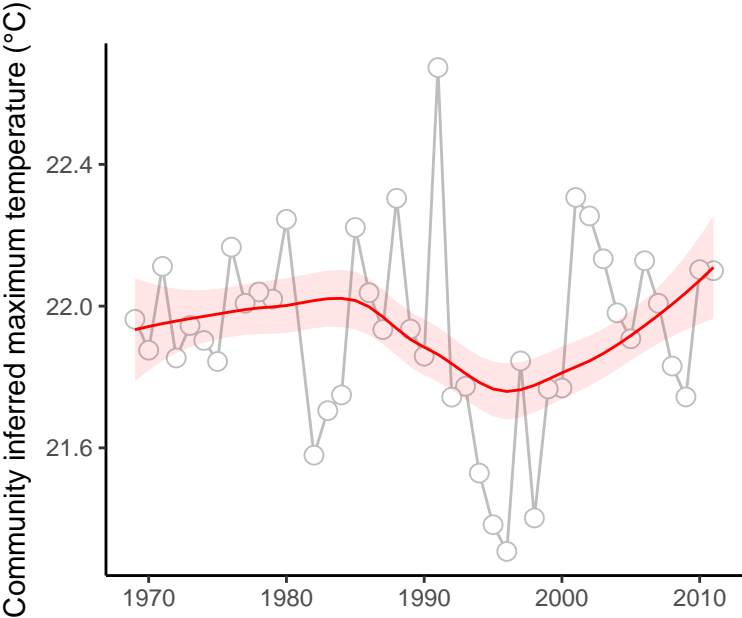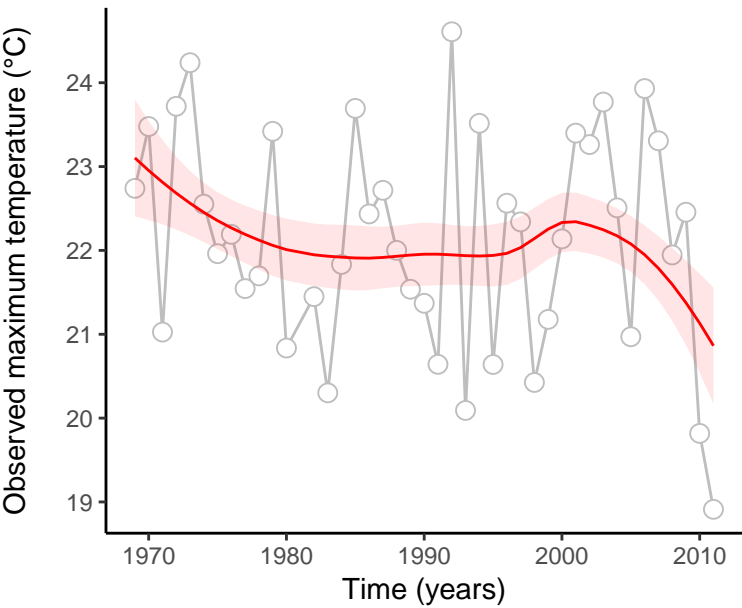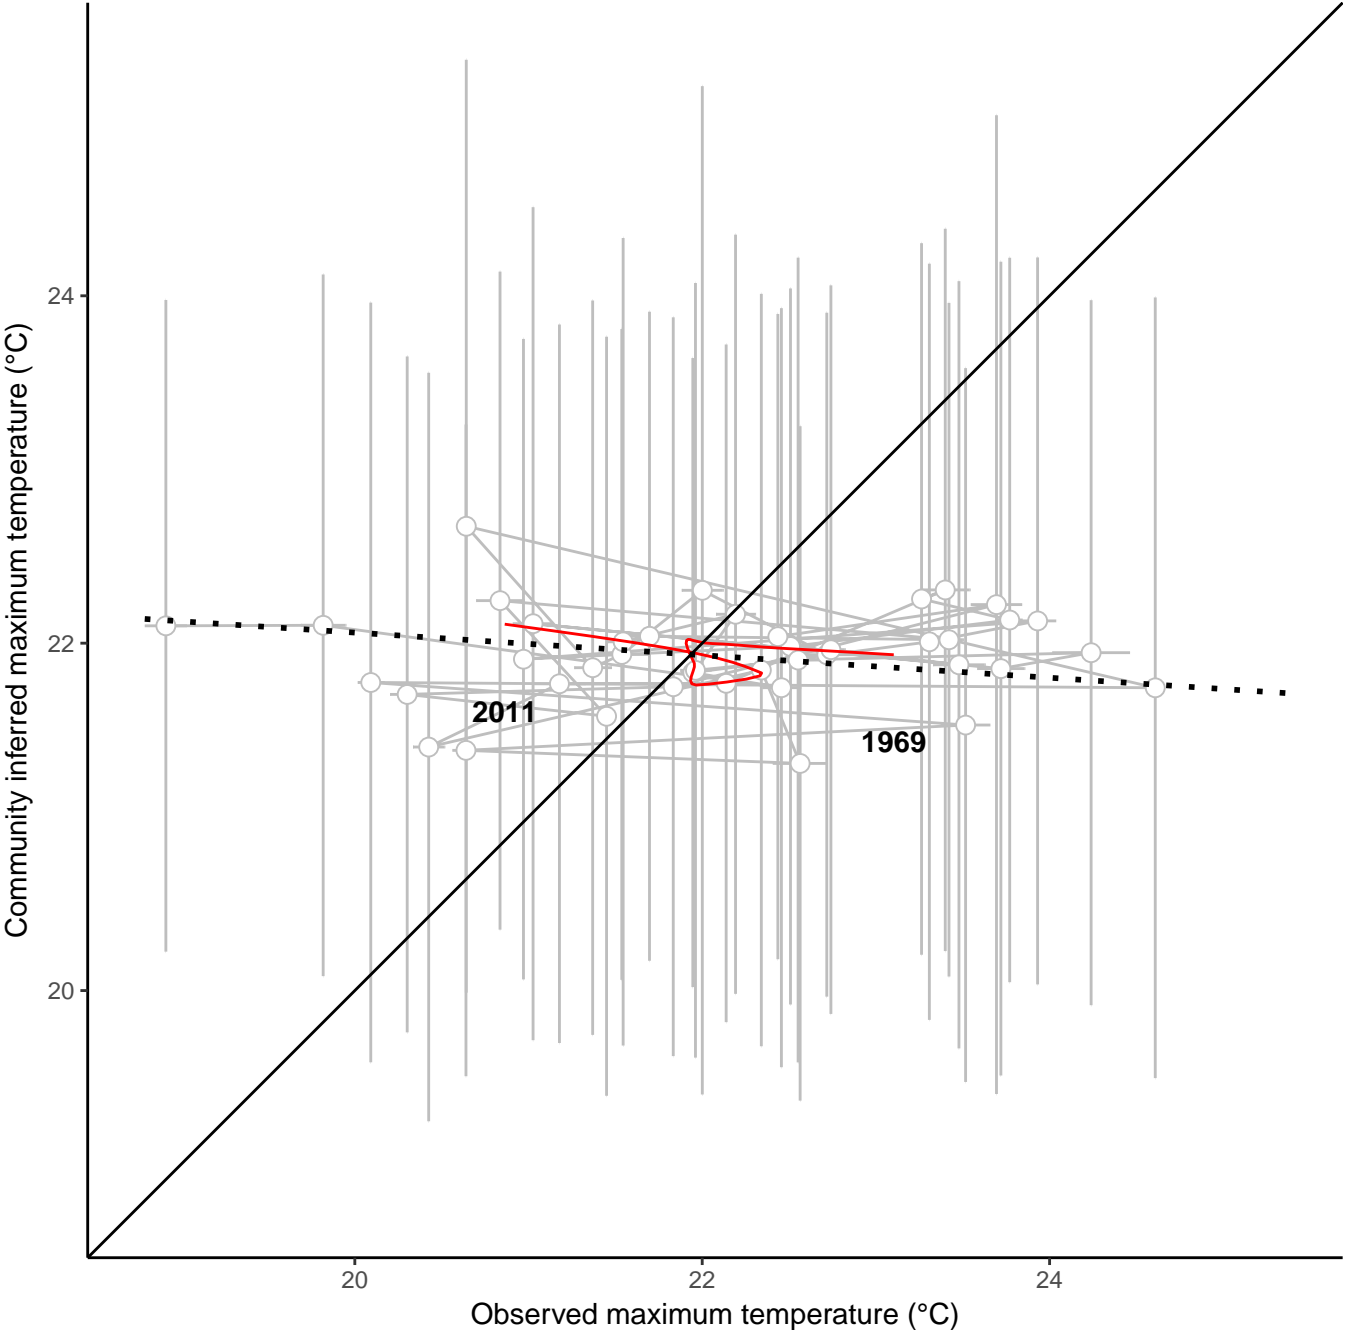

site : 840\_69\_23

absolute deviation = 0.53 | deviation change = 0.4 | maximum state number = 1

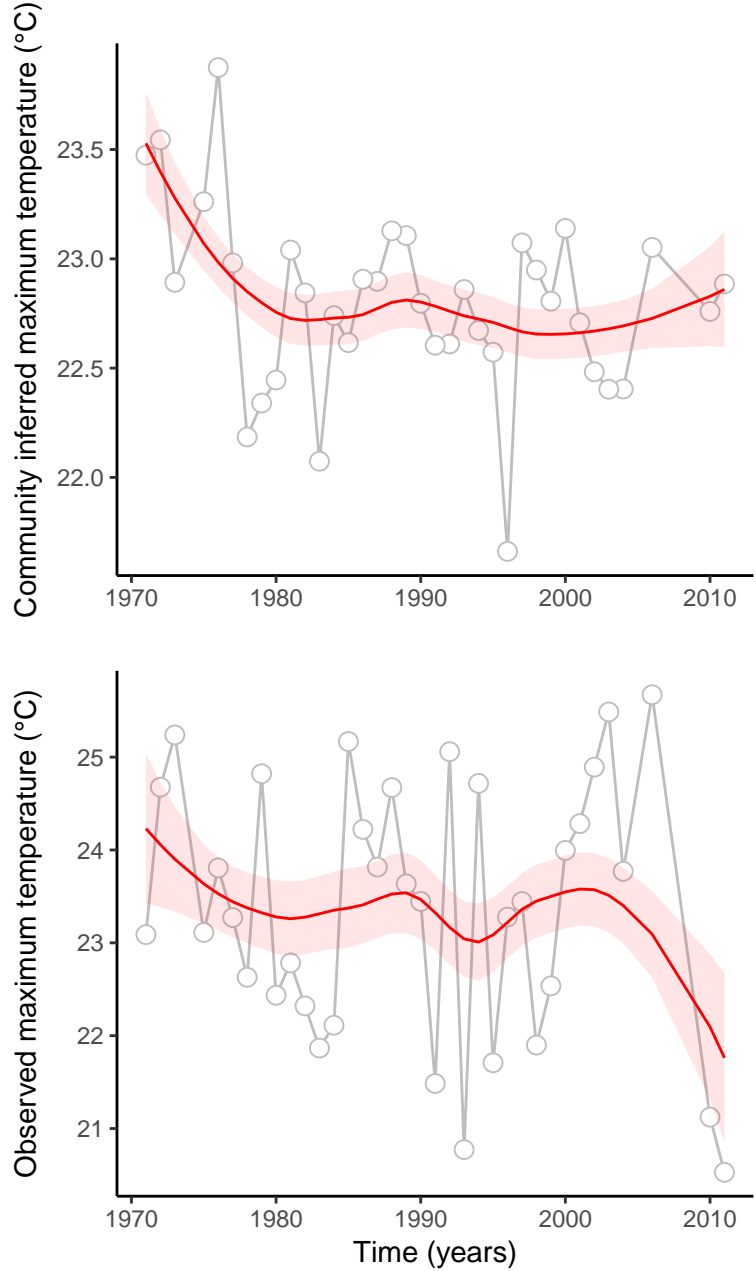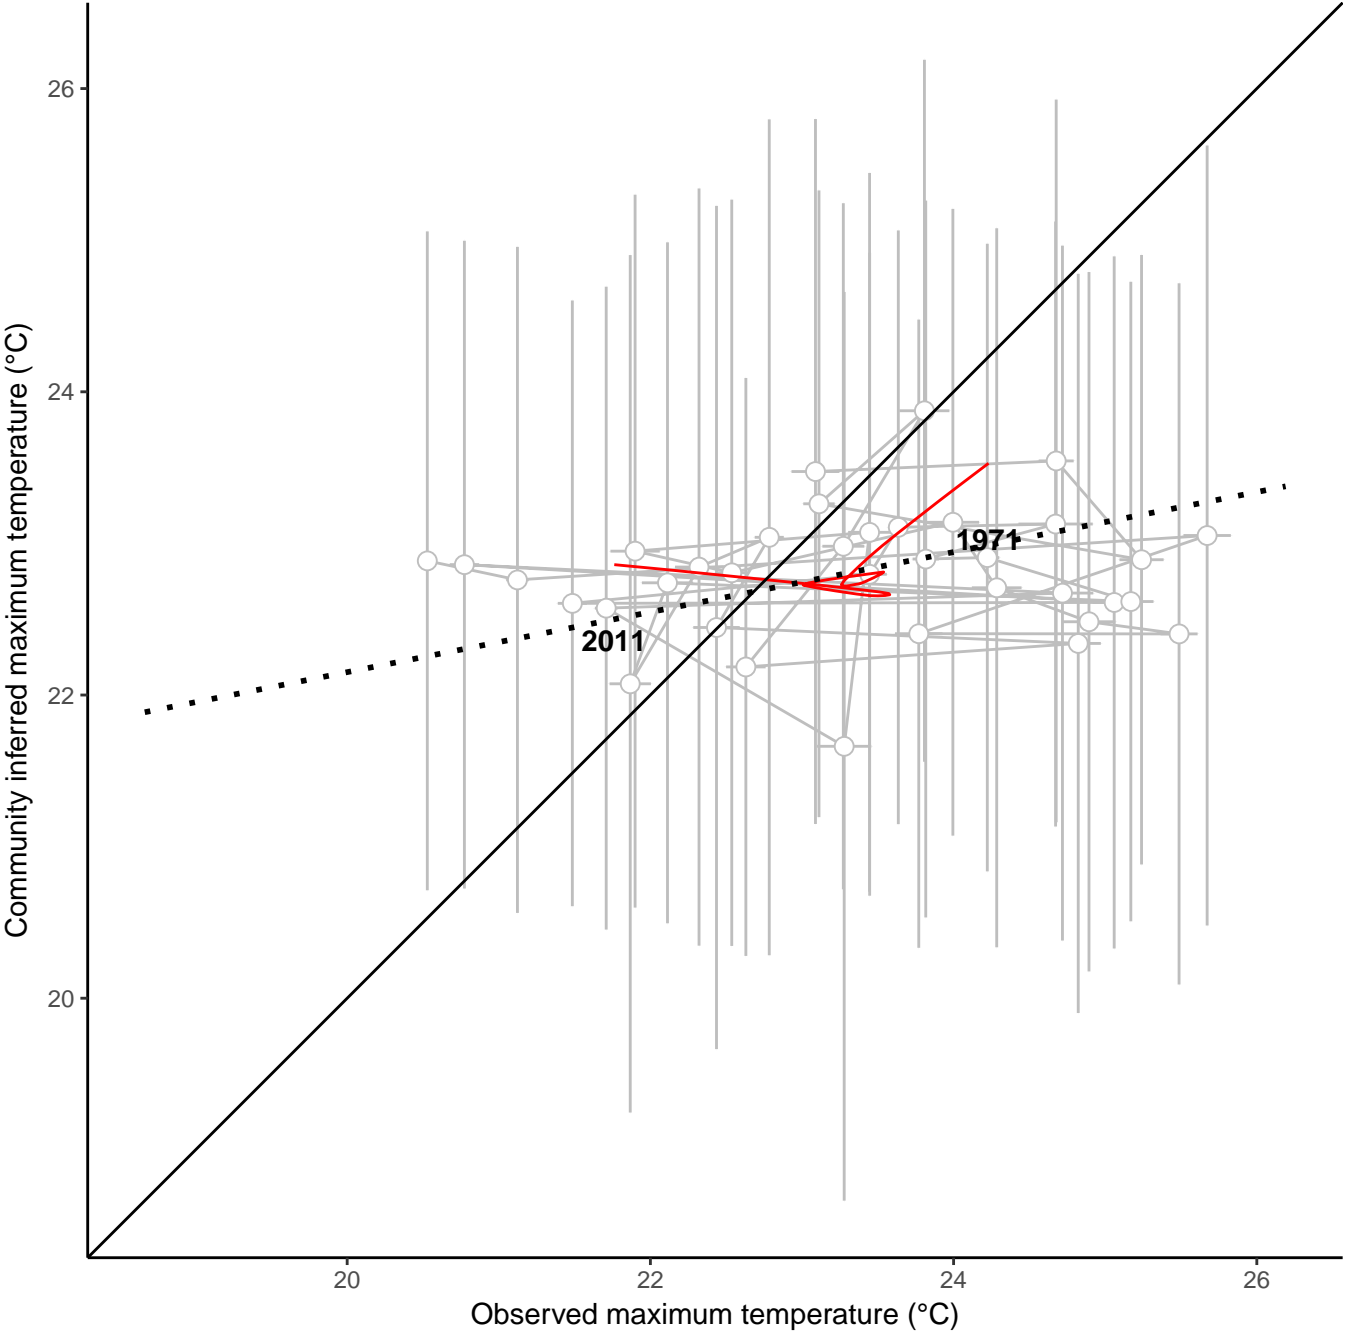

site : 840\_53\_25

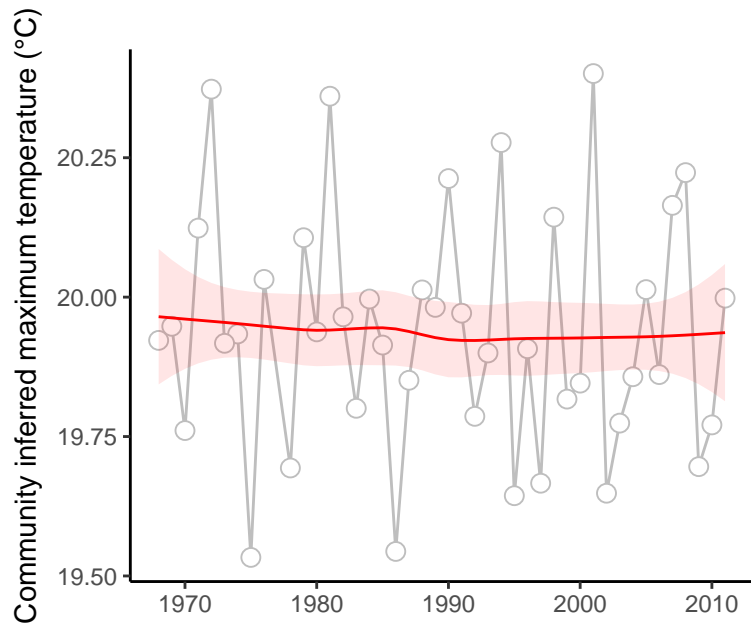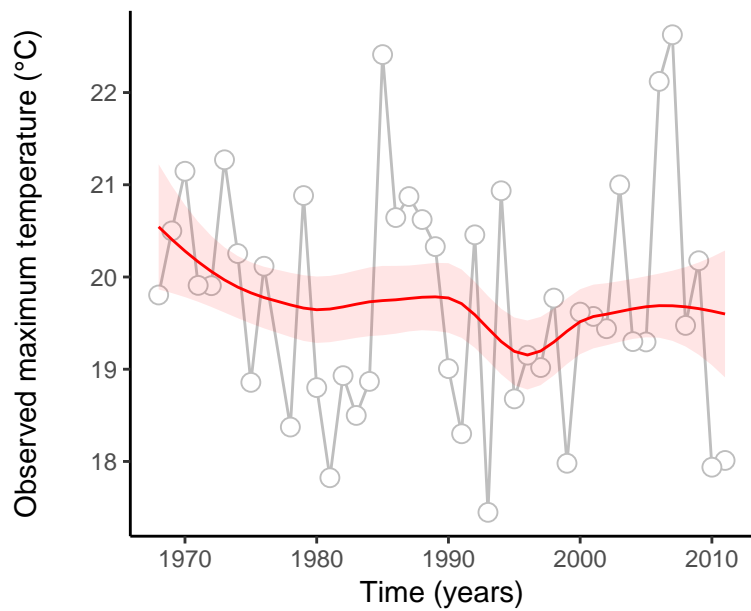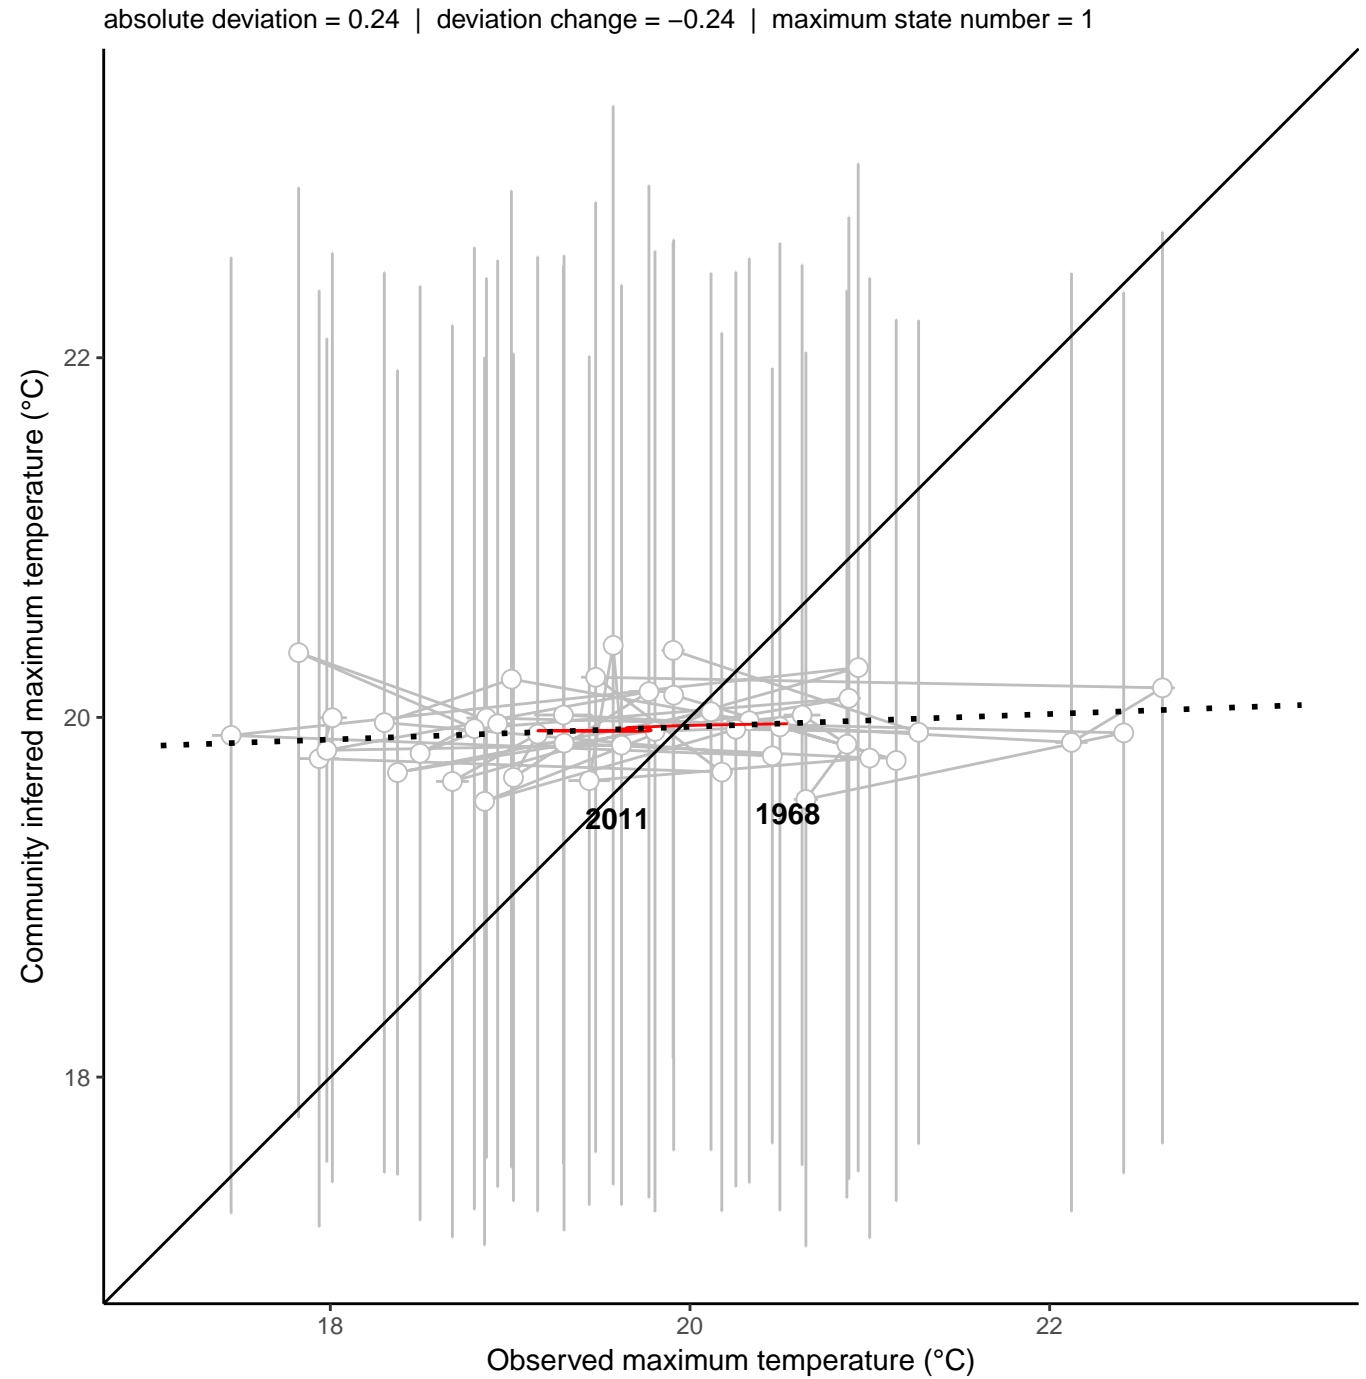

site : 840\_69\_52

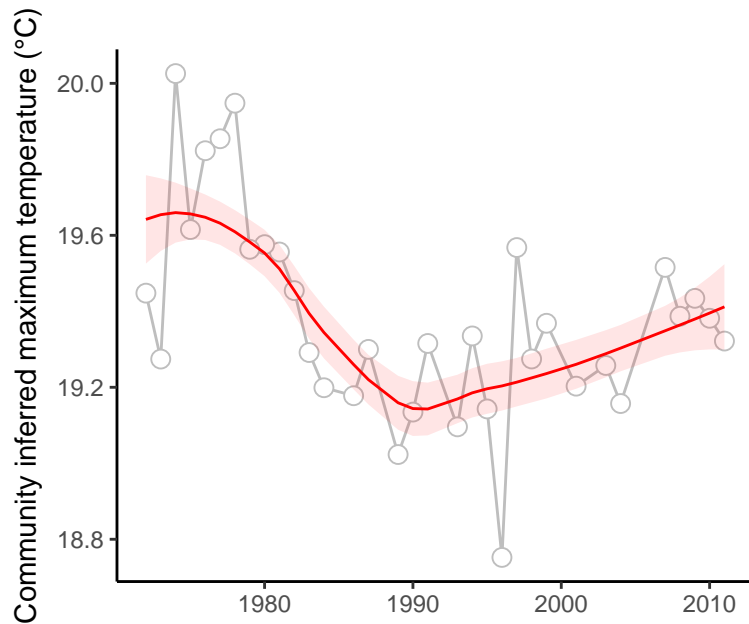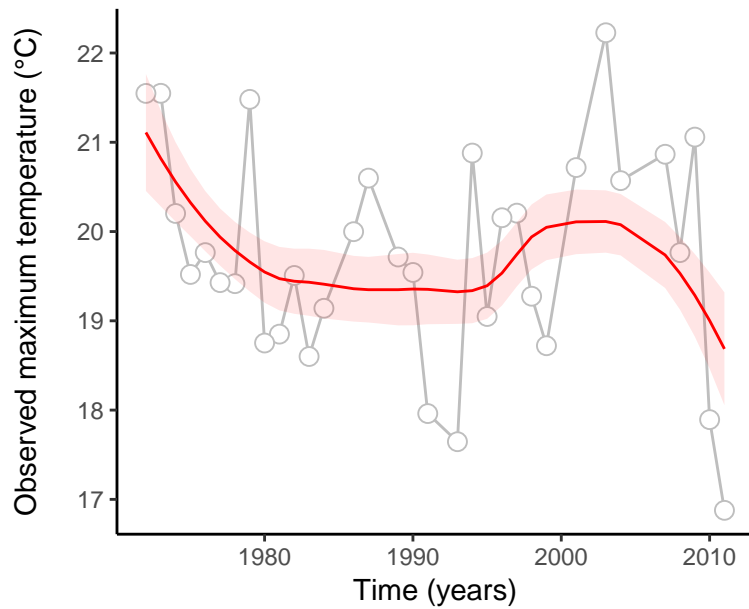

absolute deviation = 0.33 | deviation change = -0.74 | maximum state number = 1

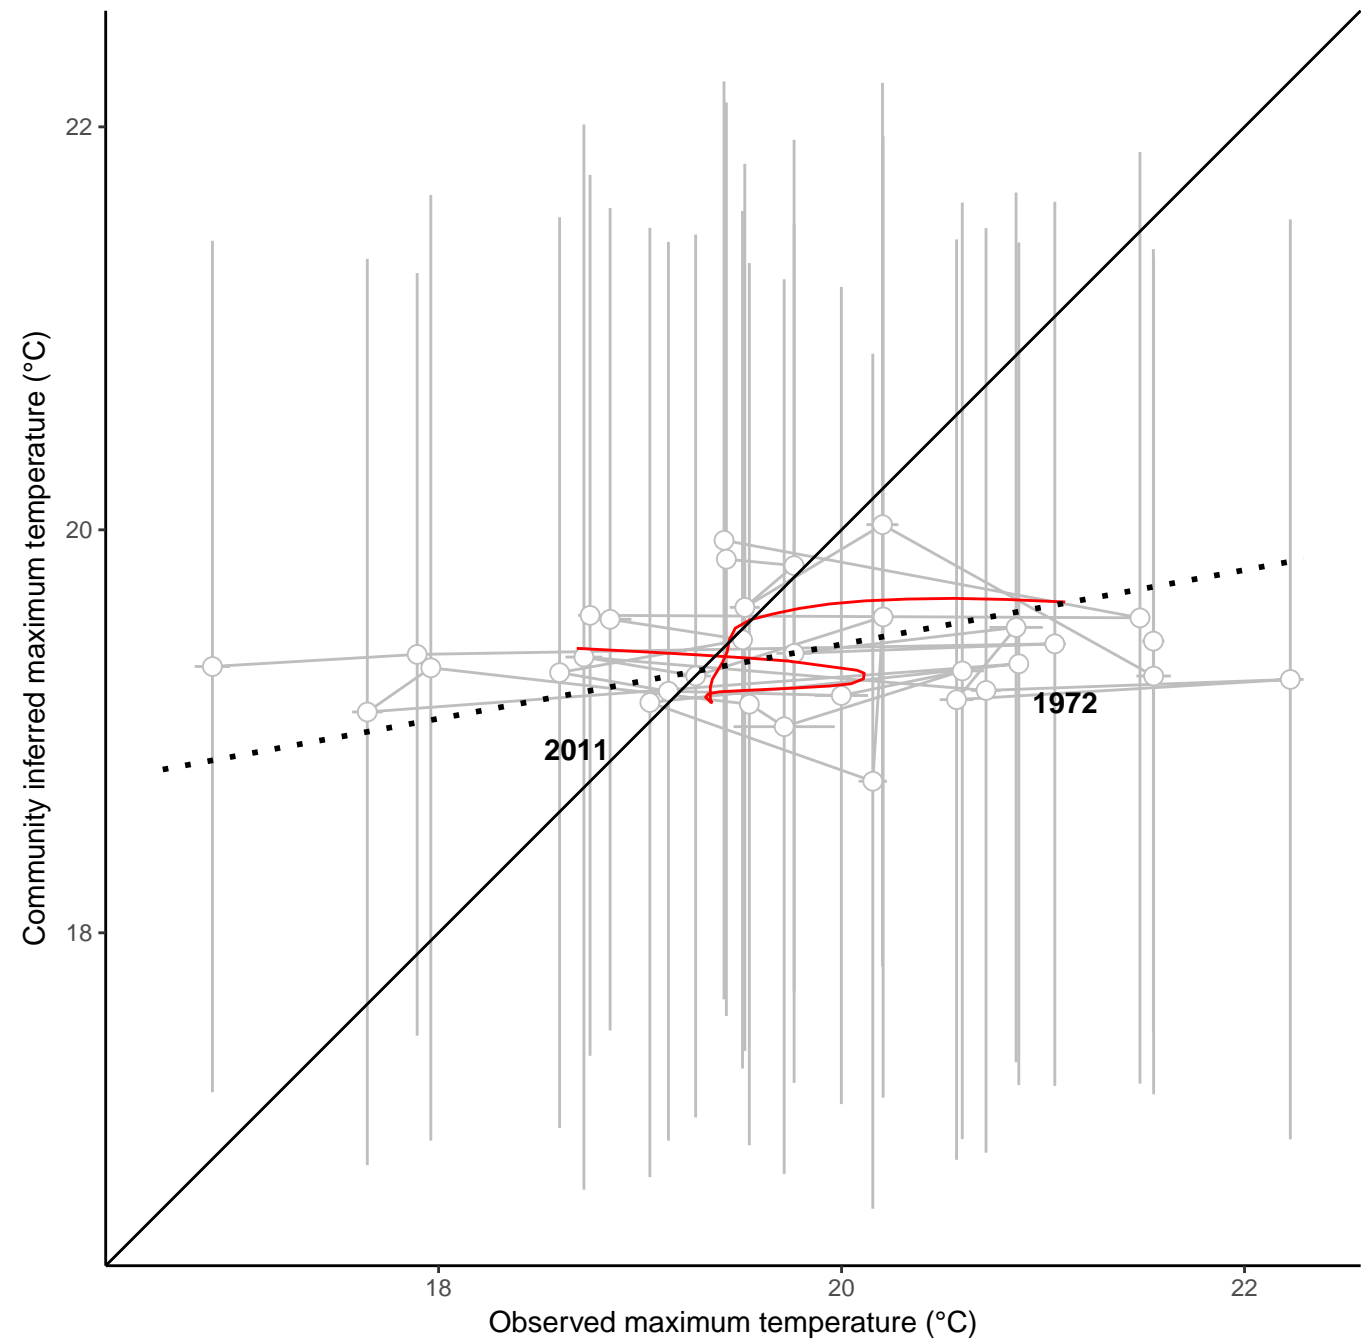

site : 840\_91\_25

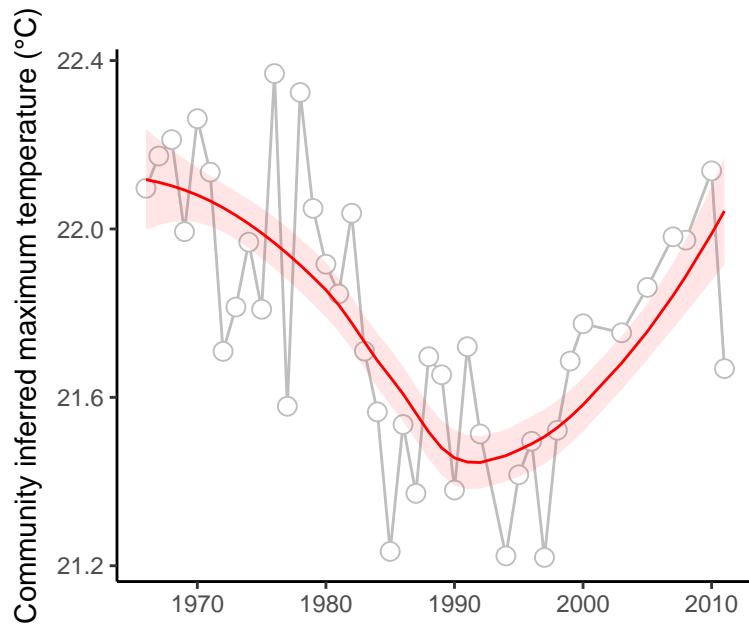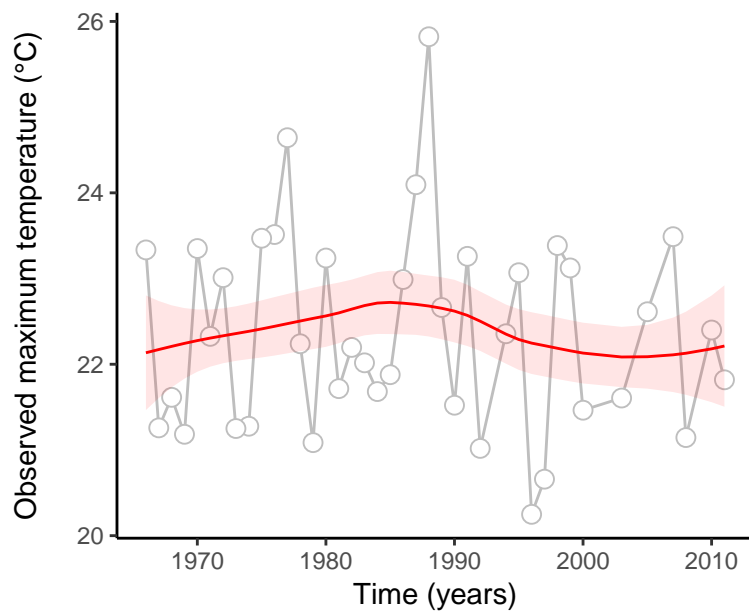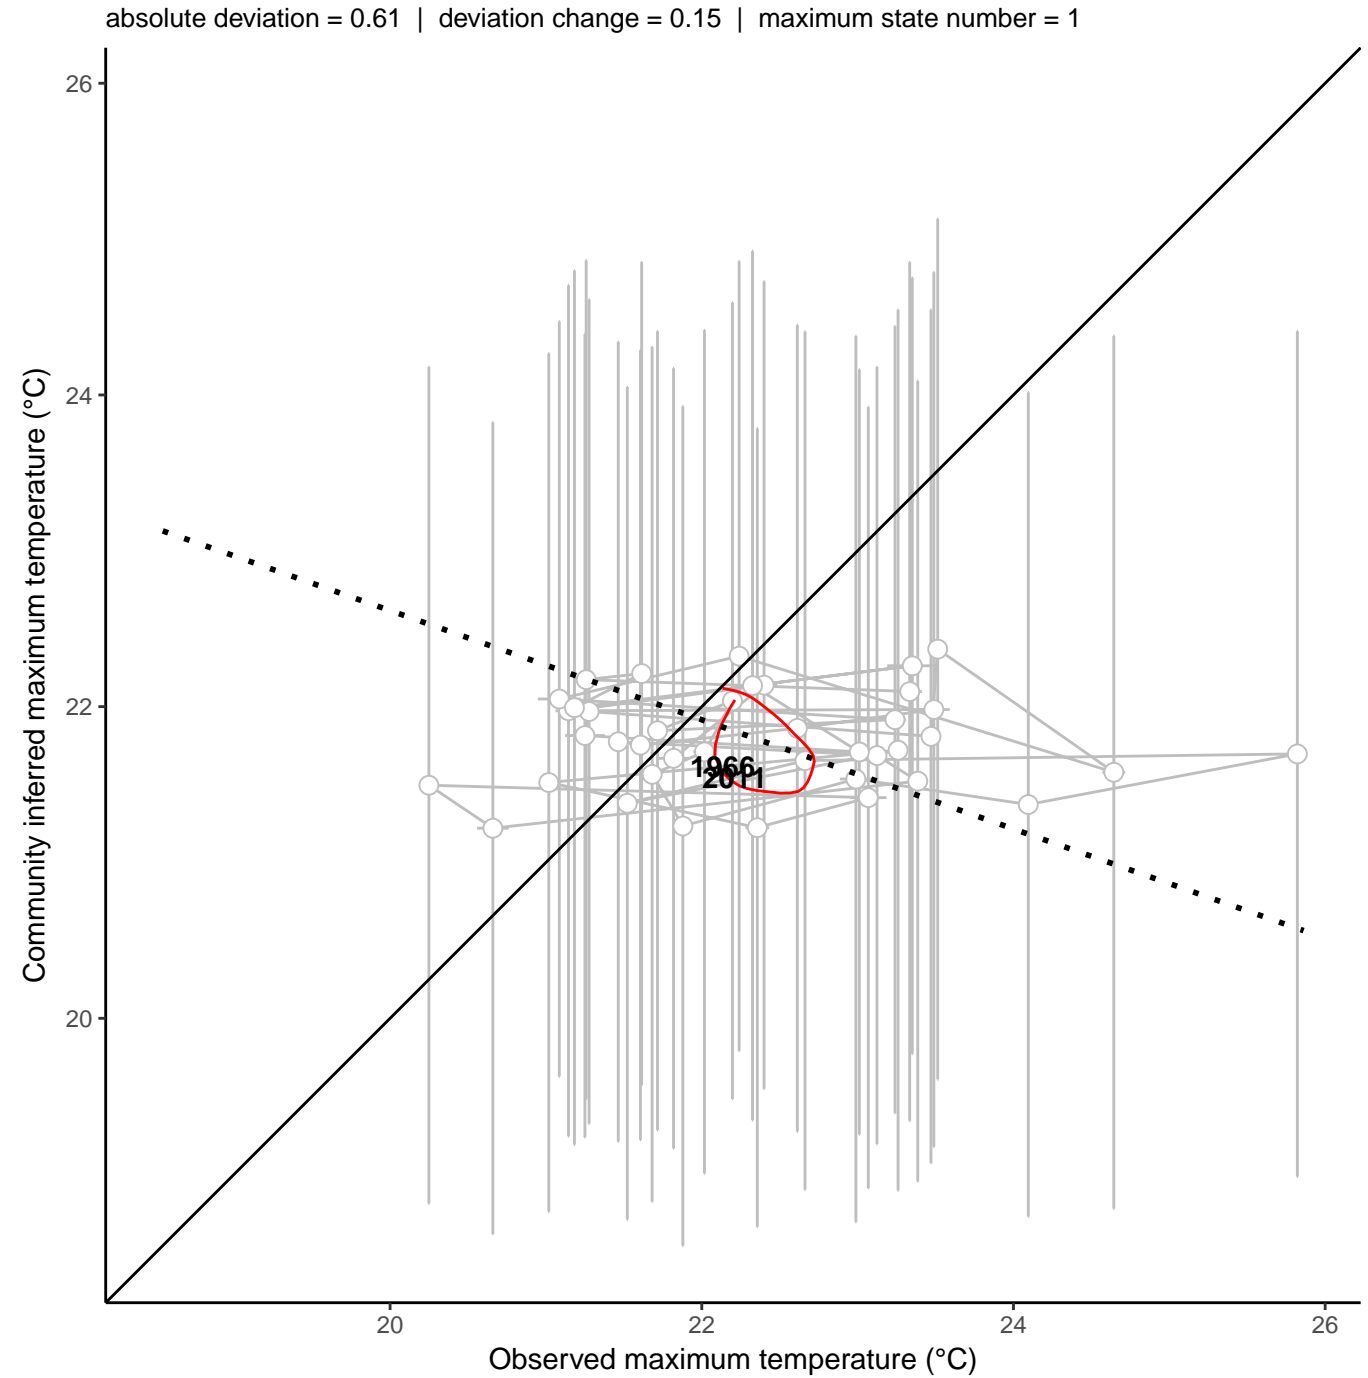

site : 840\_87\_15

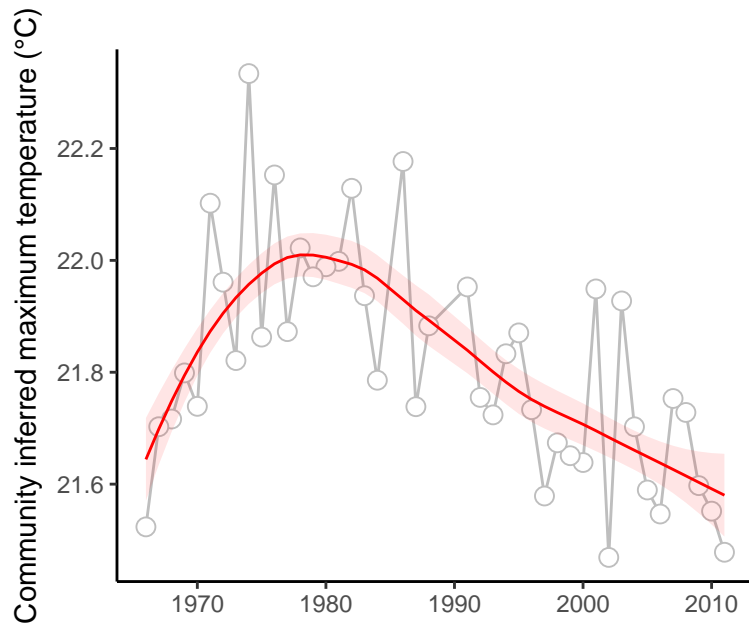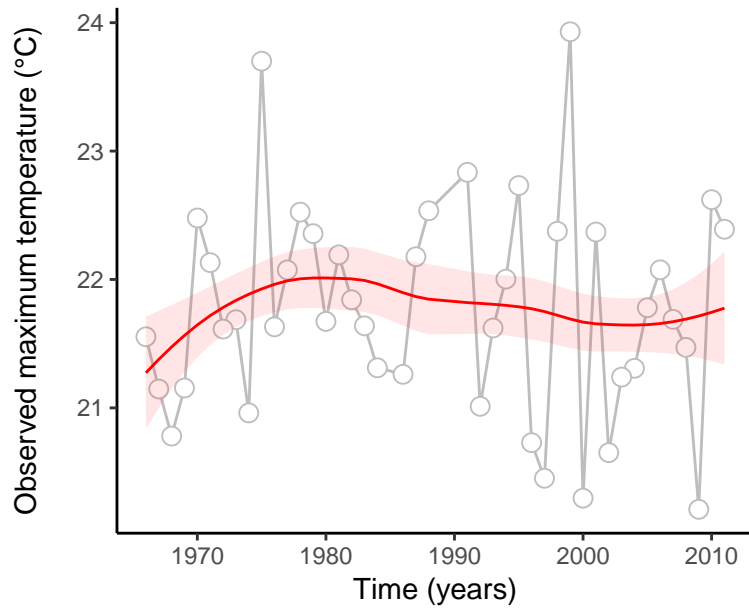

absolute deviation = 0.04 | deviation change = -0.18 | maximum state number = 1

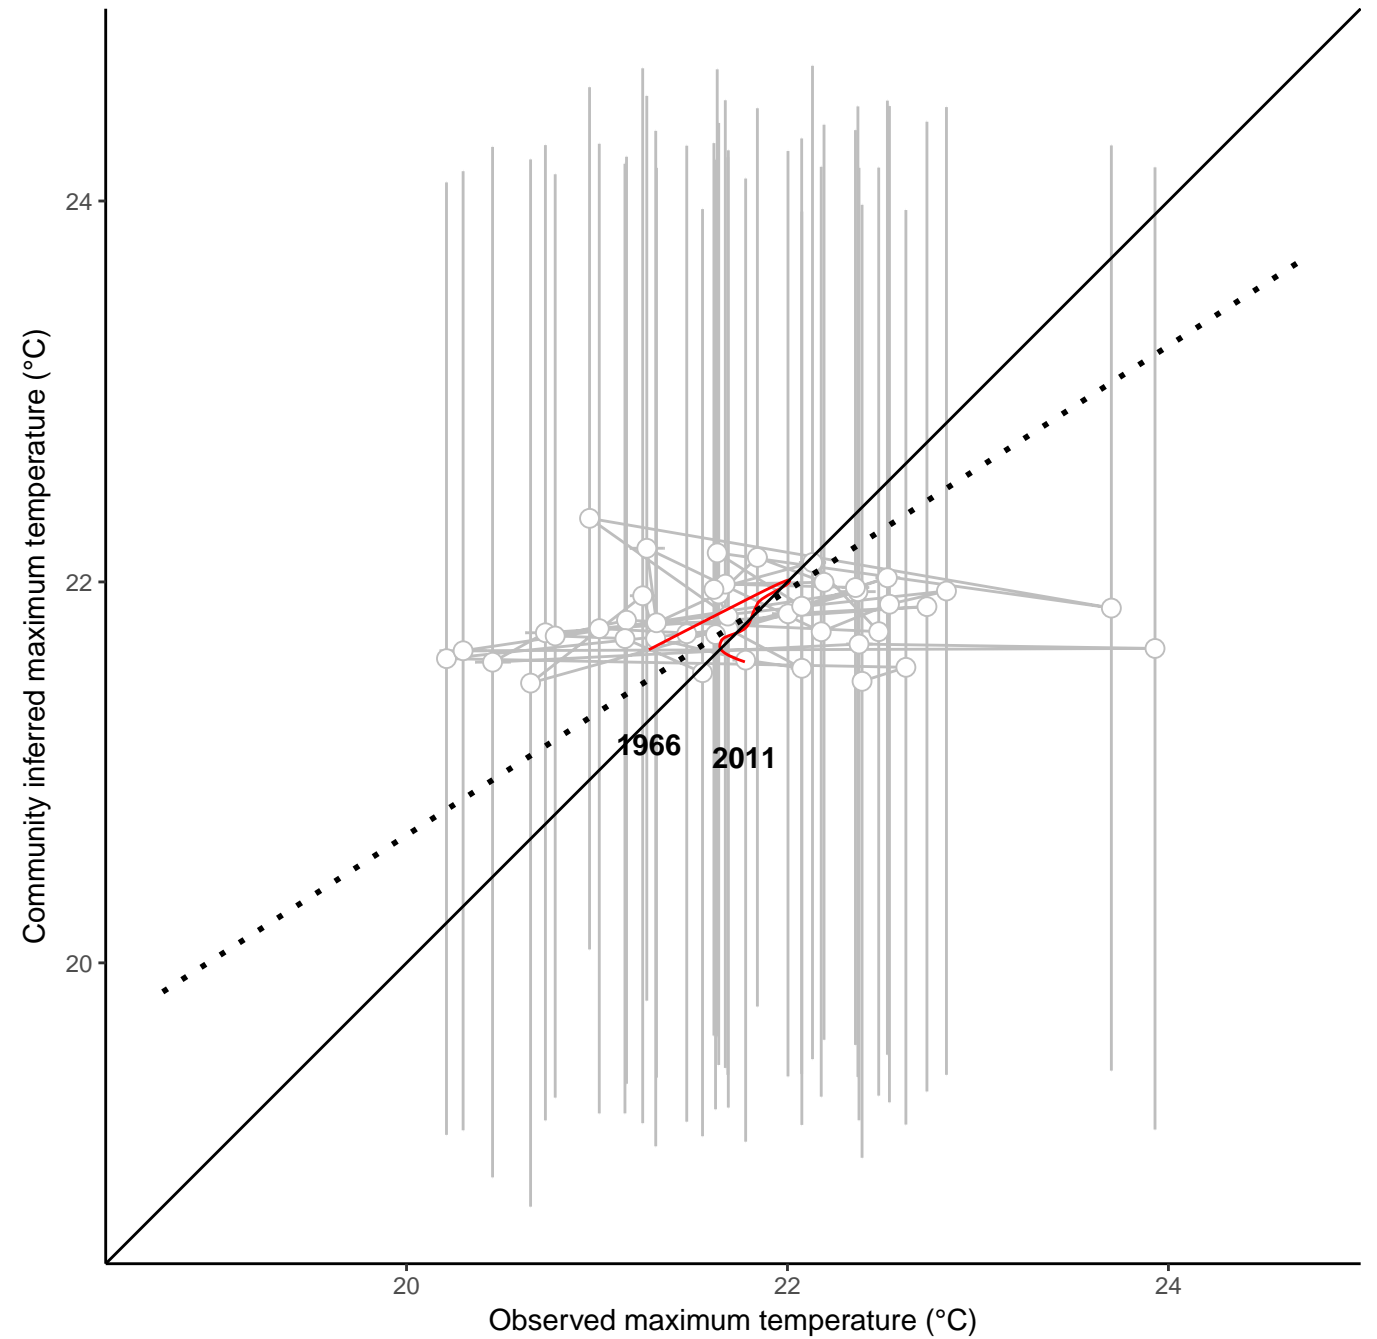

site : 840\_91\_6

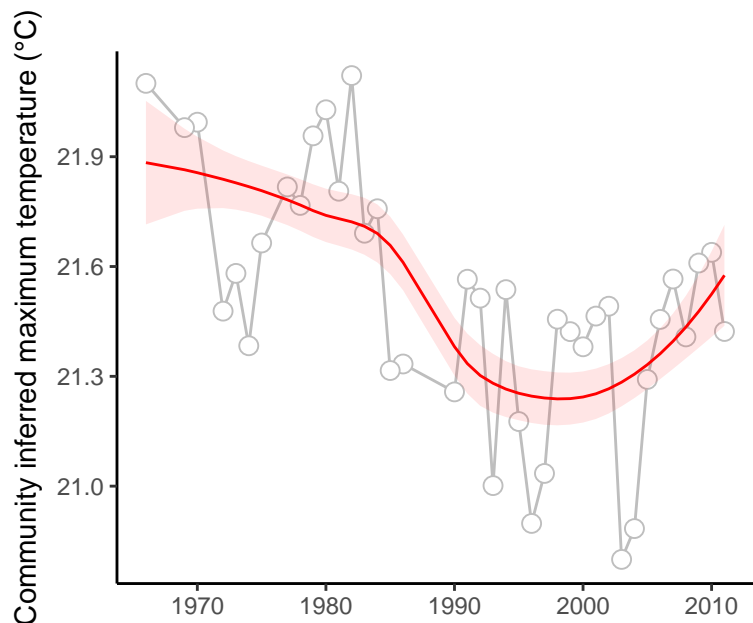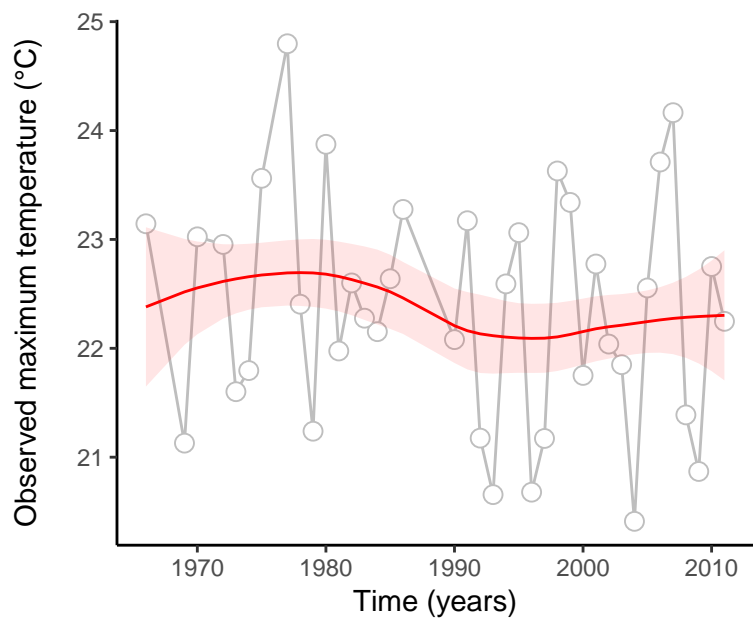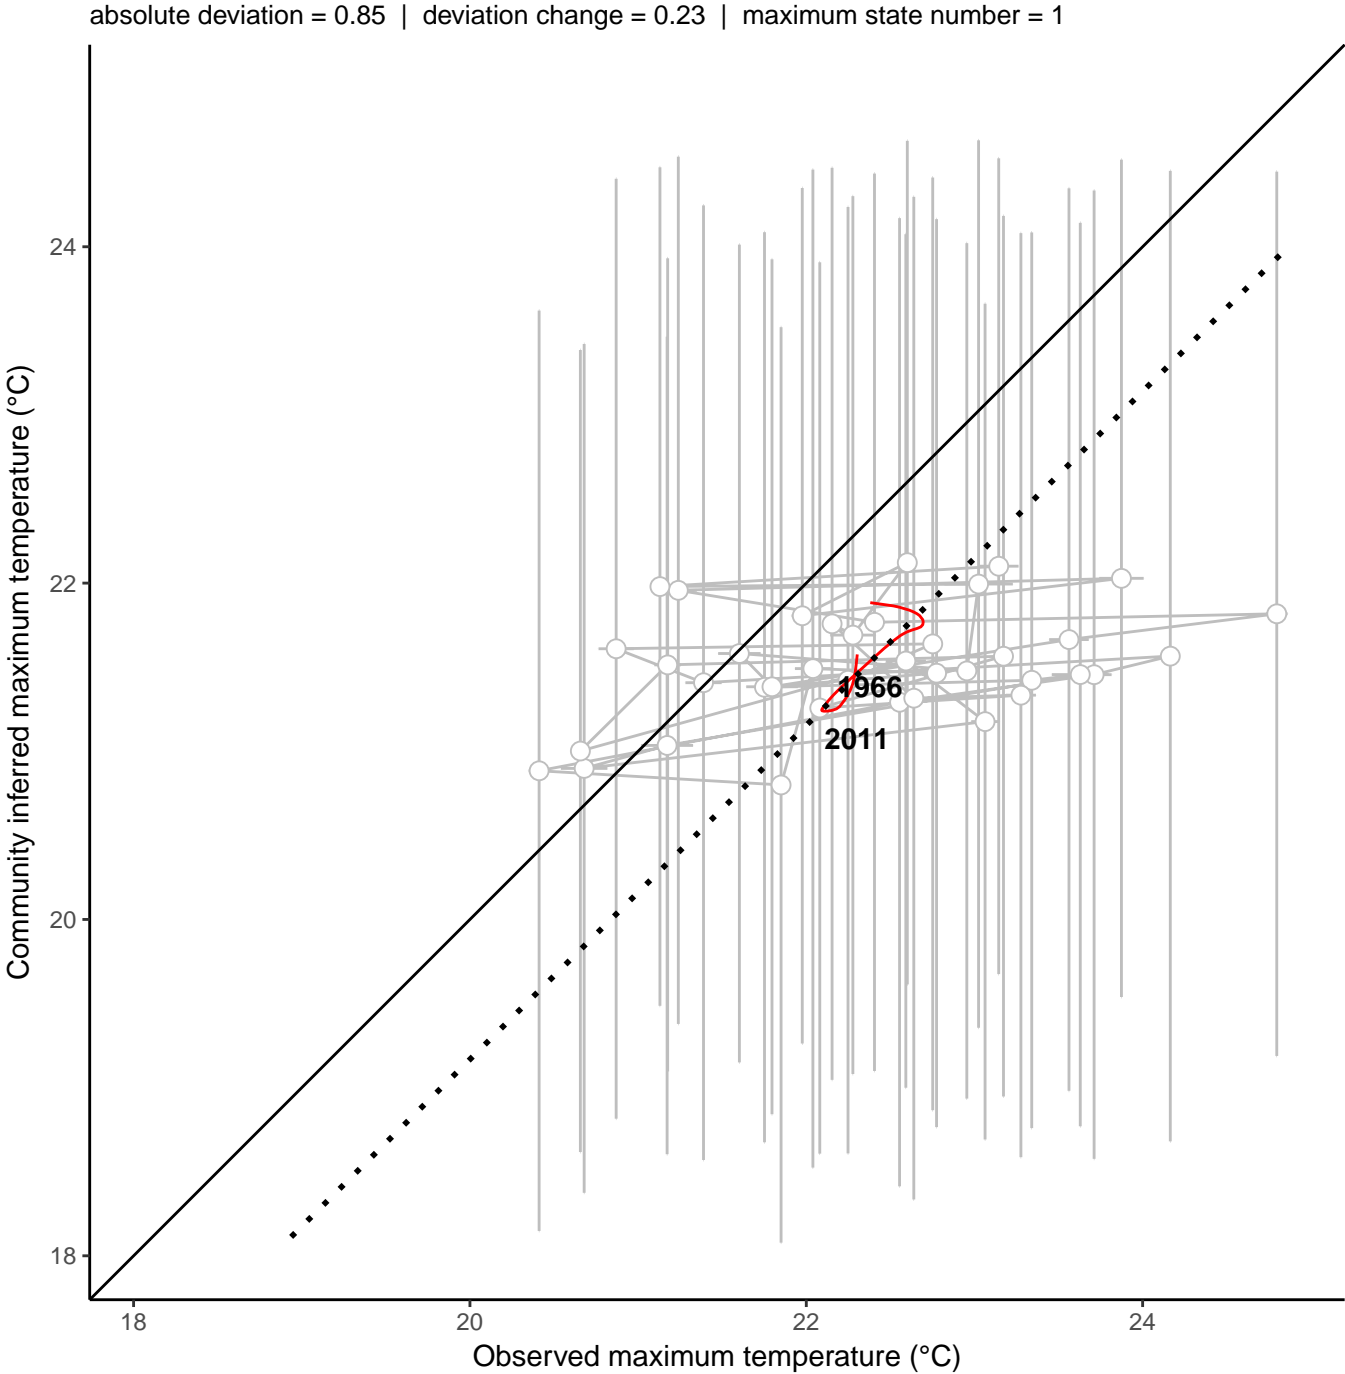

site : 840\_14\_82

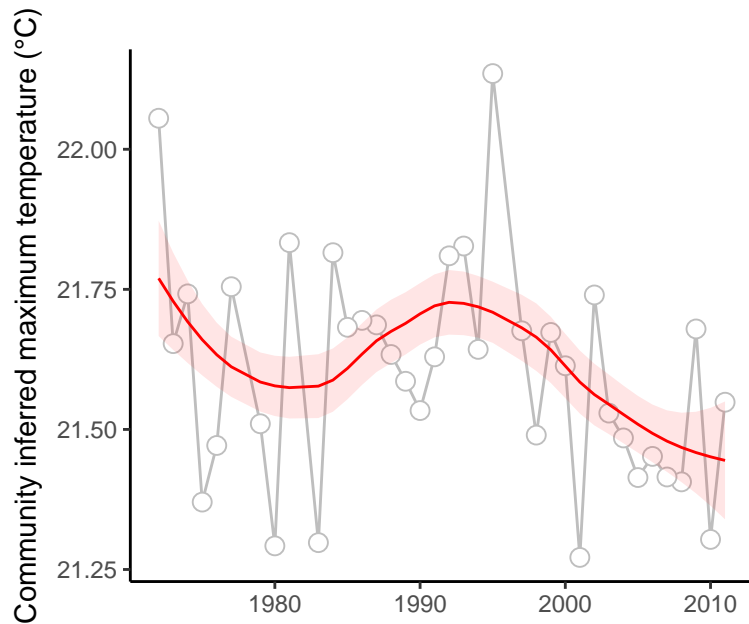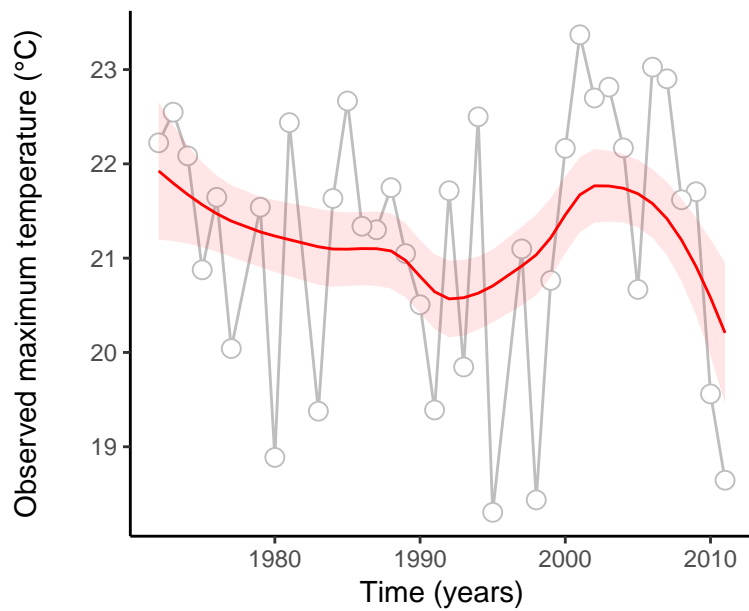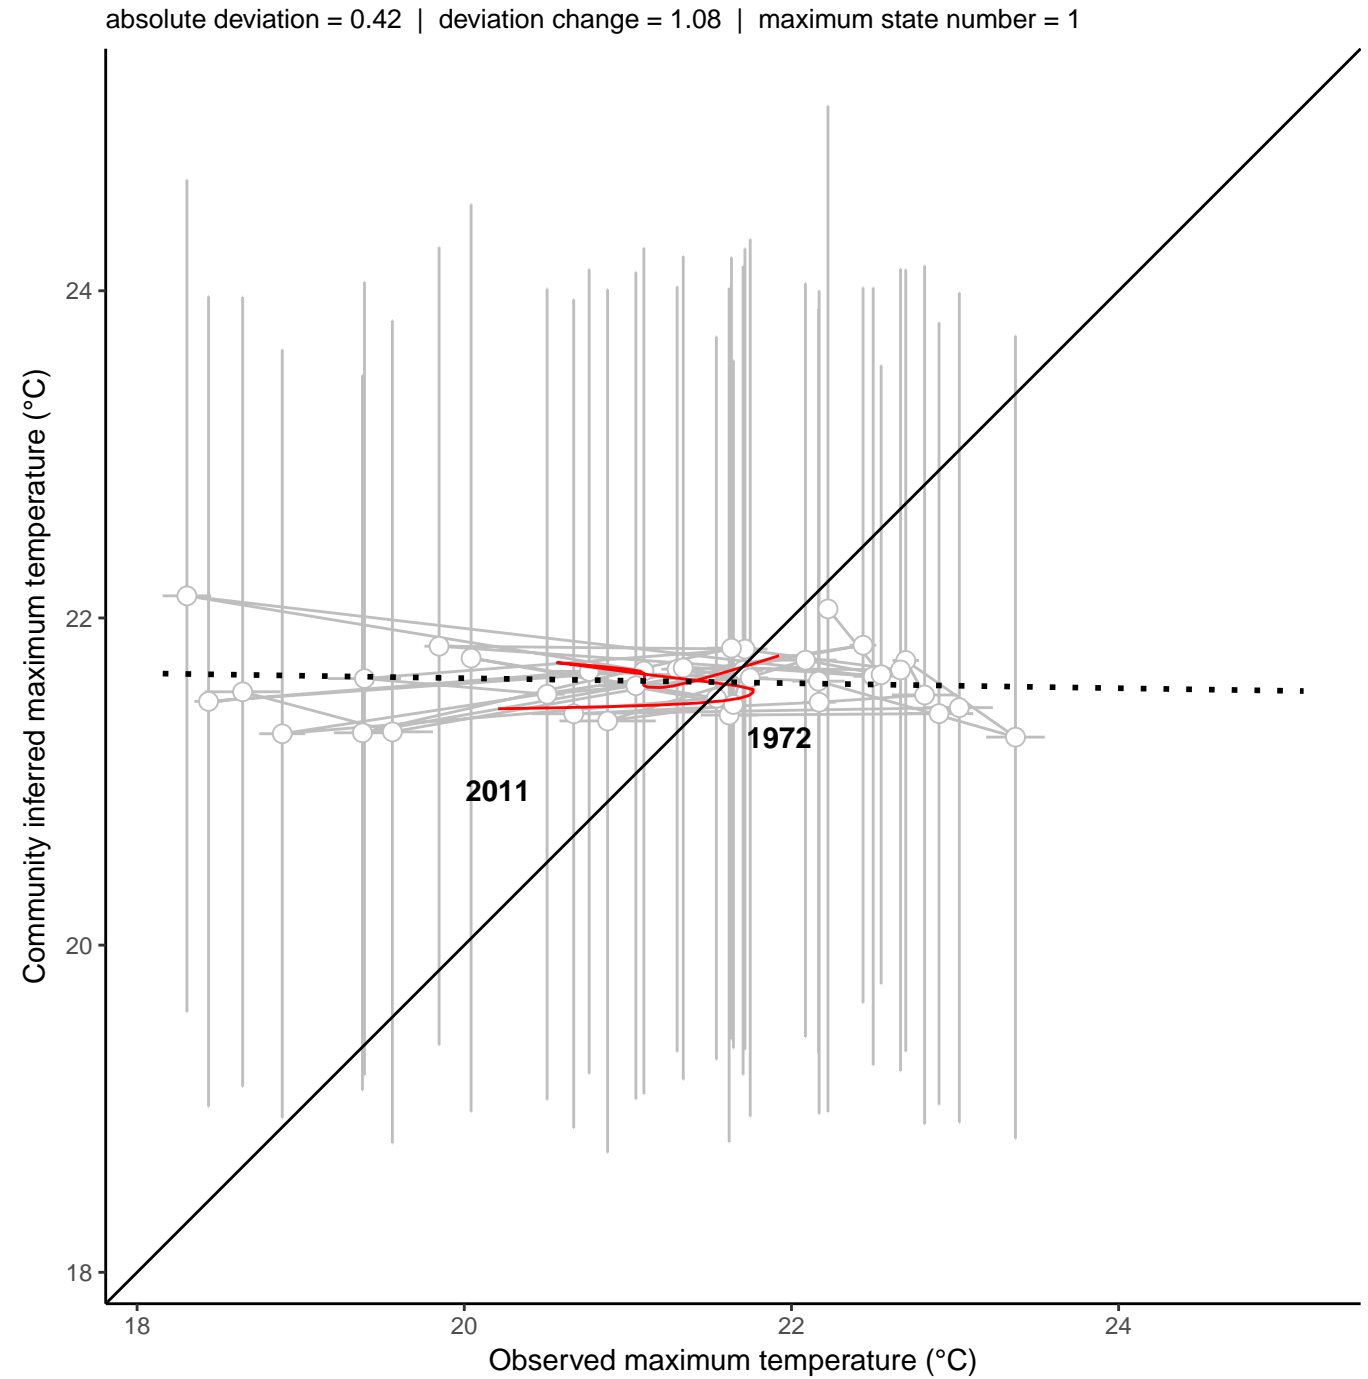



site : 840\_50\_31

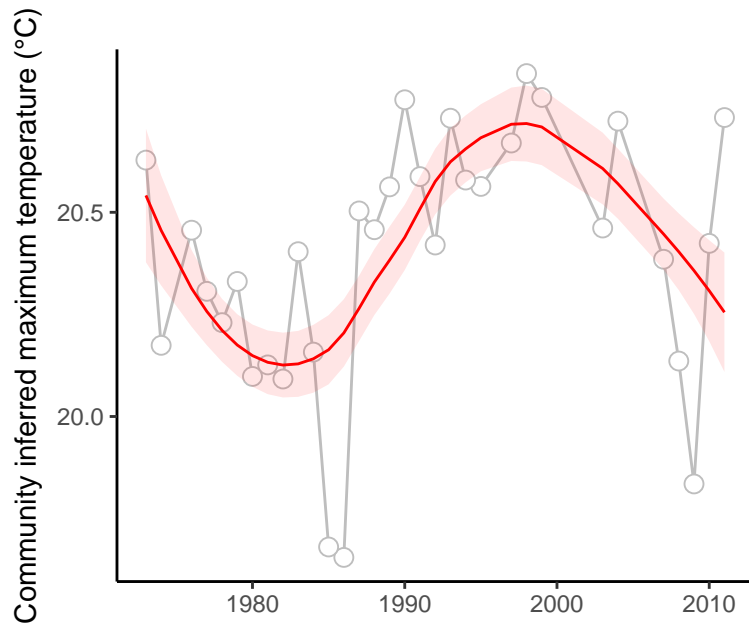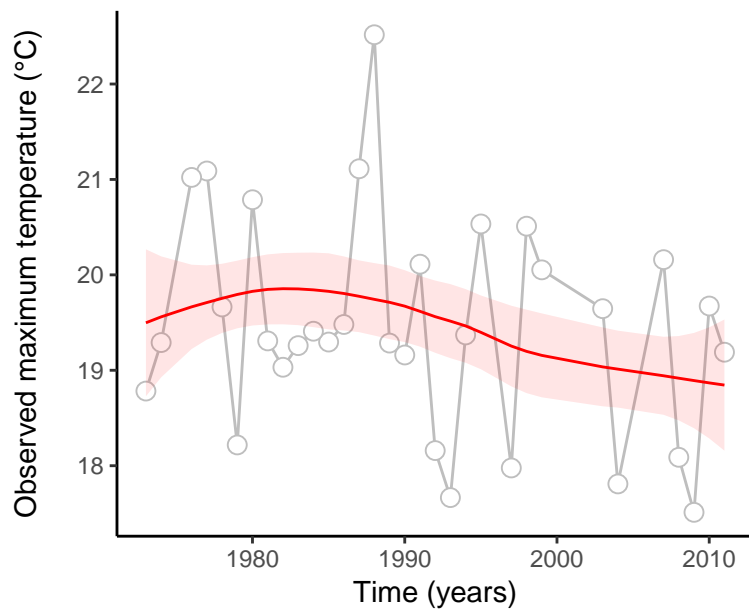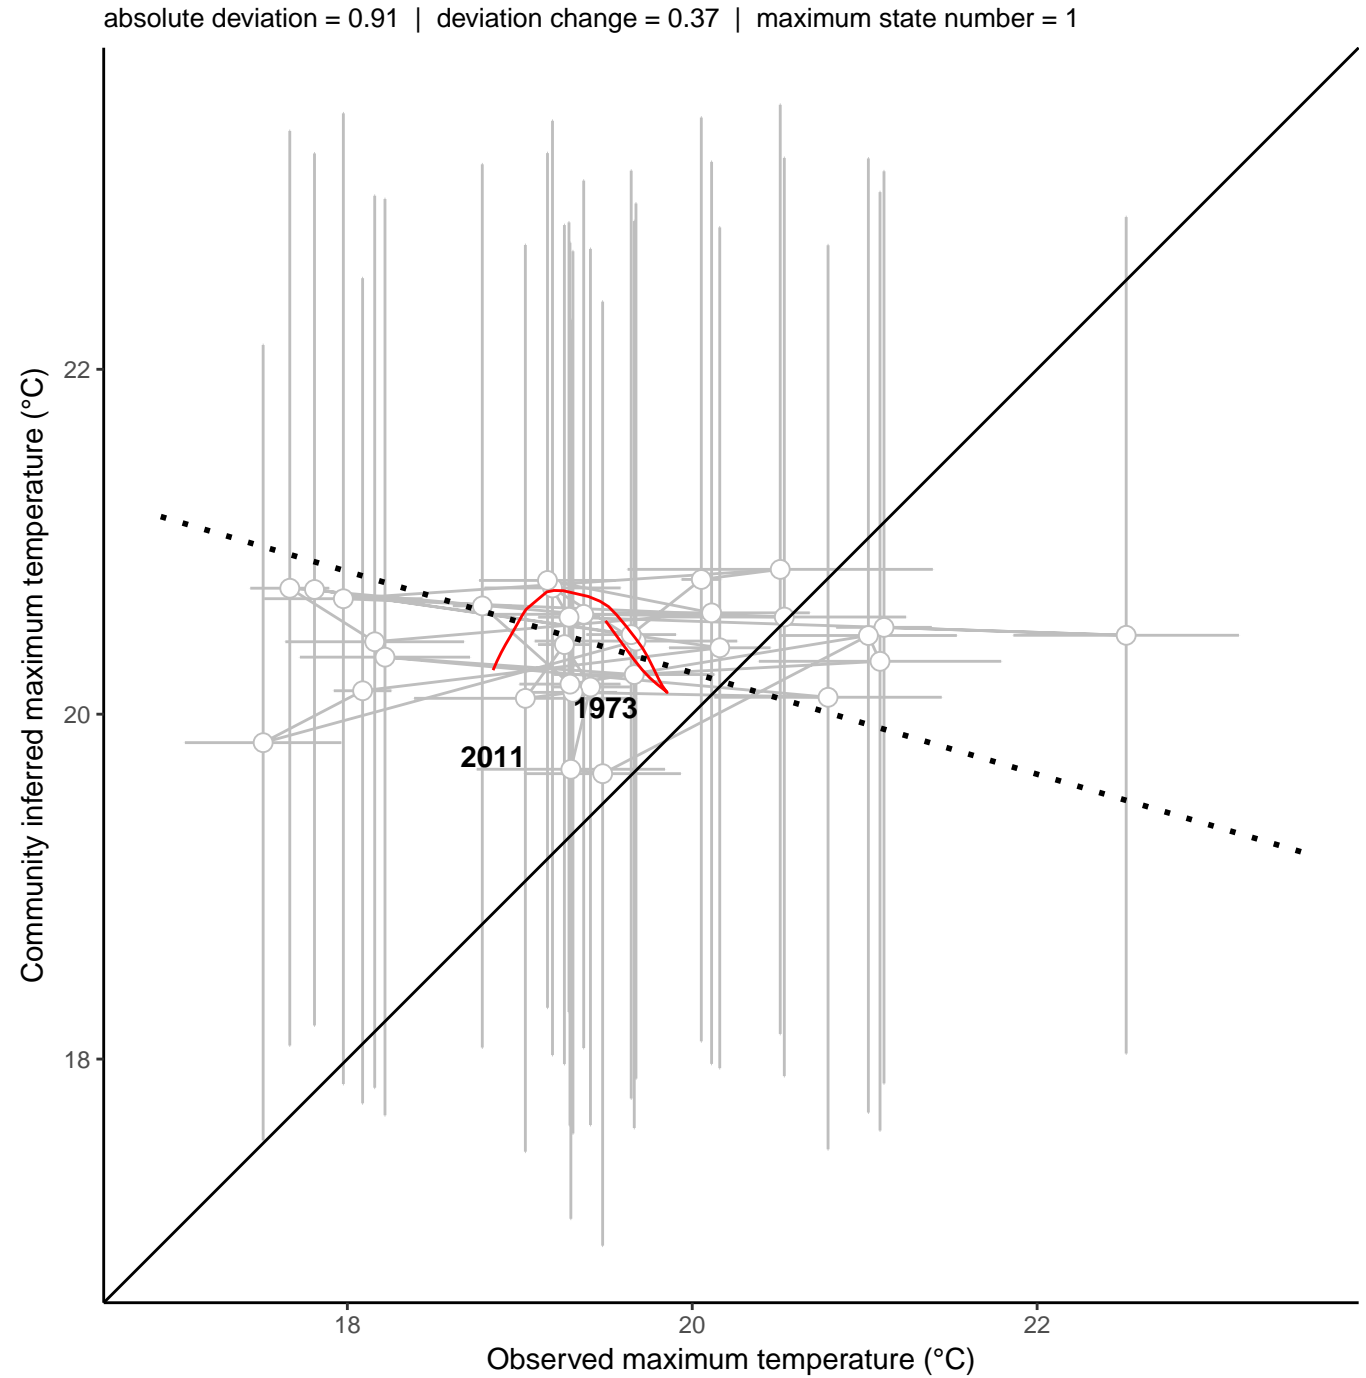

site : 840\_14\_205

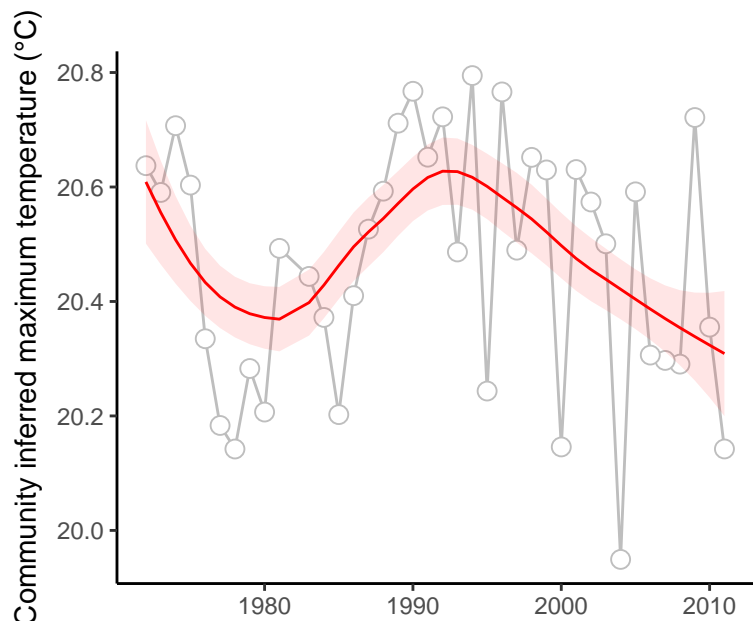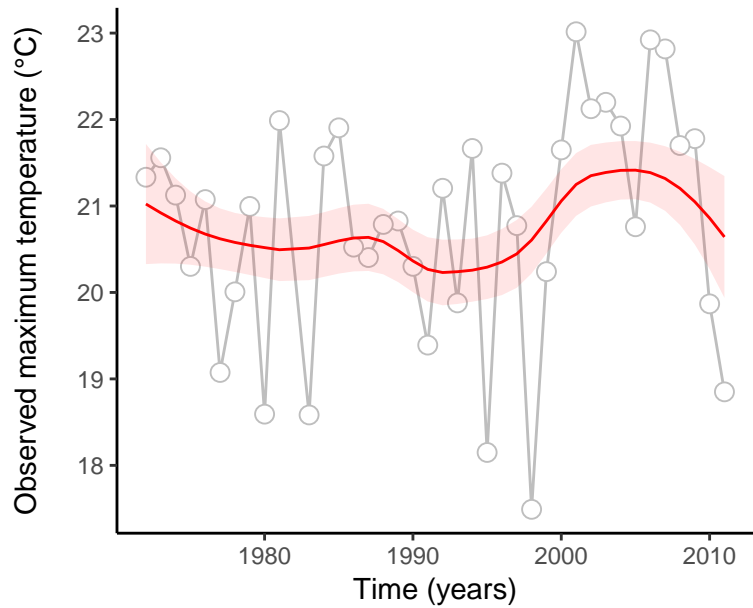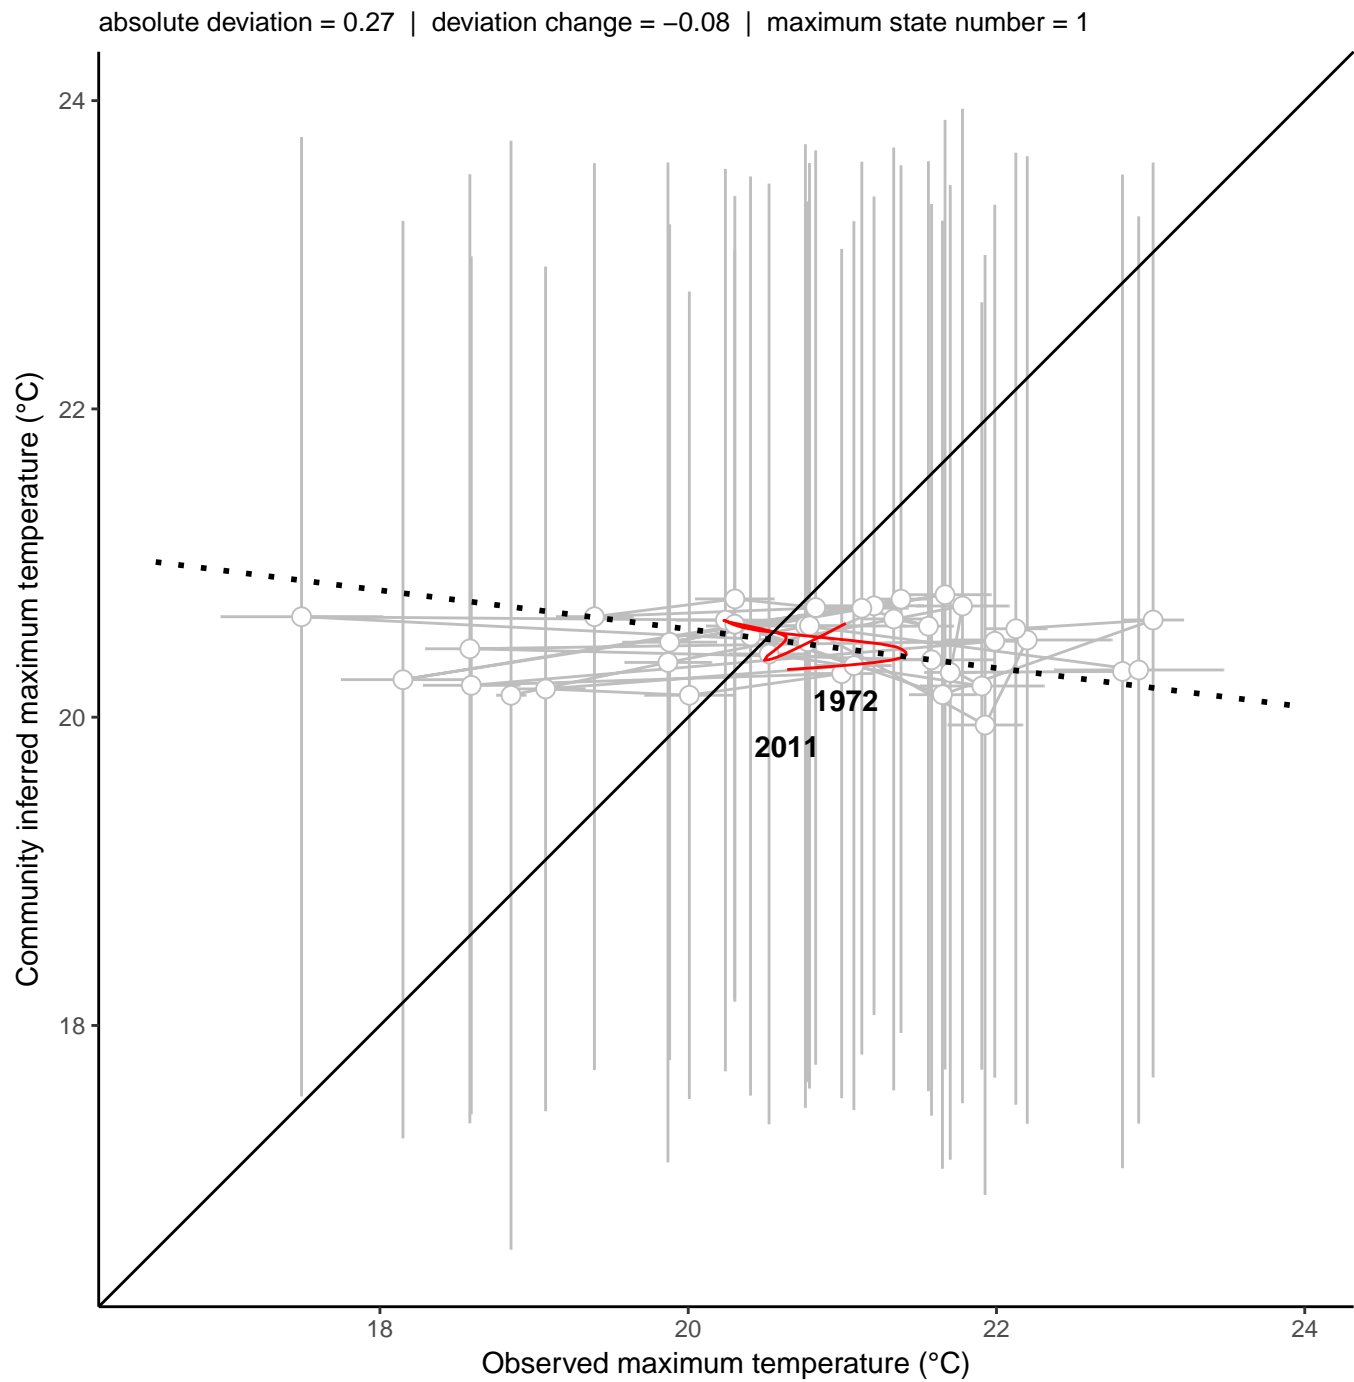

site : 840\_61\_72

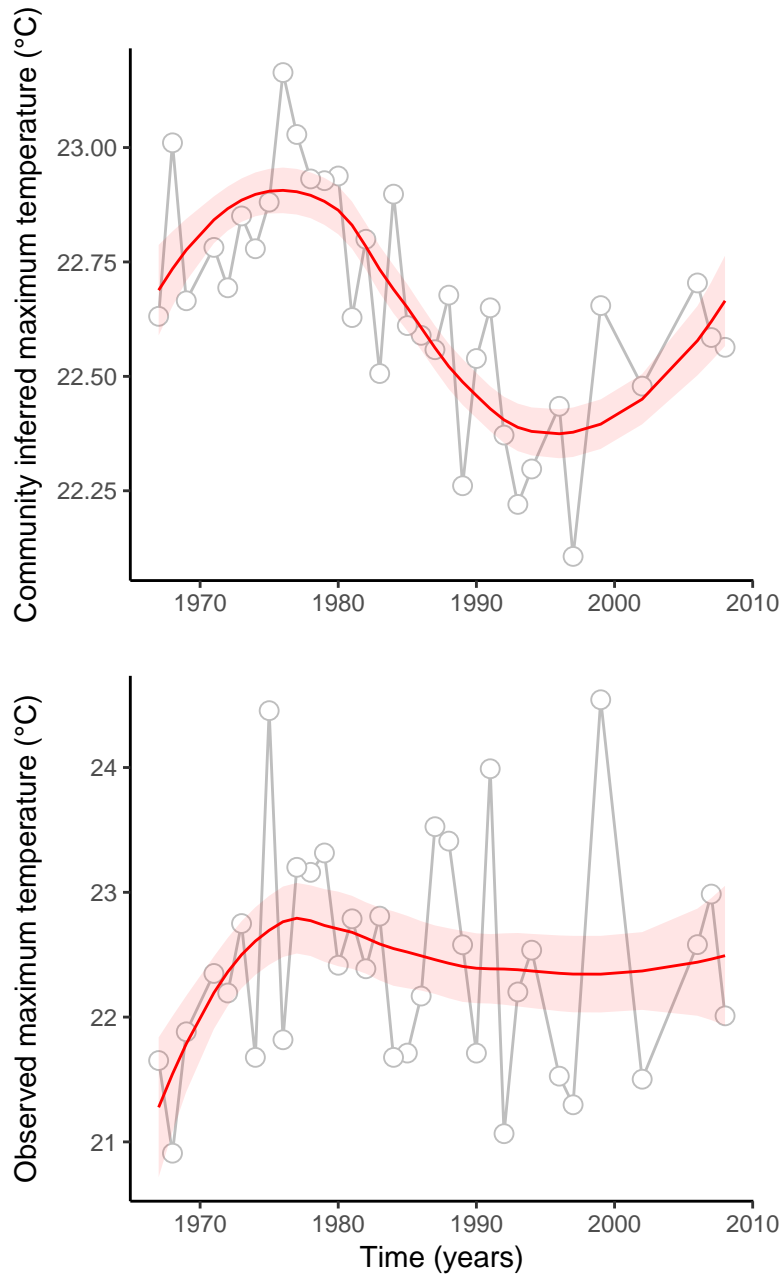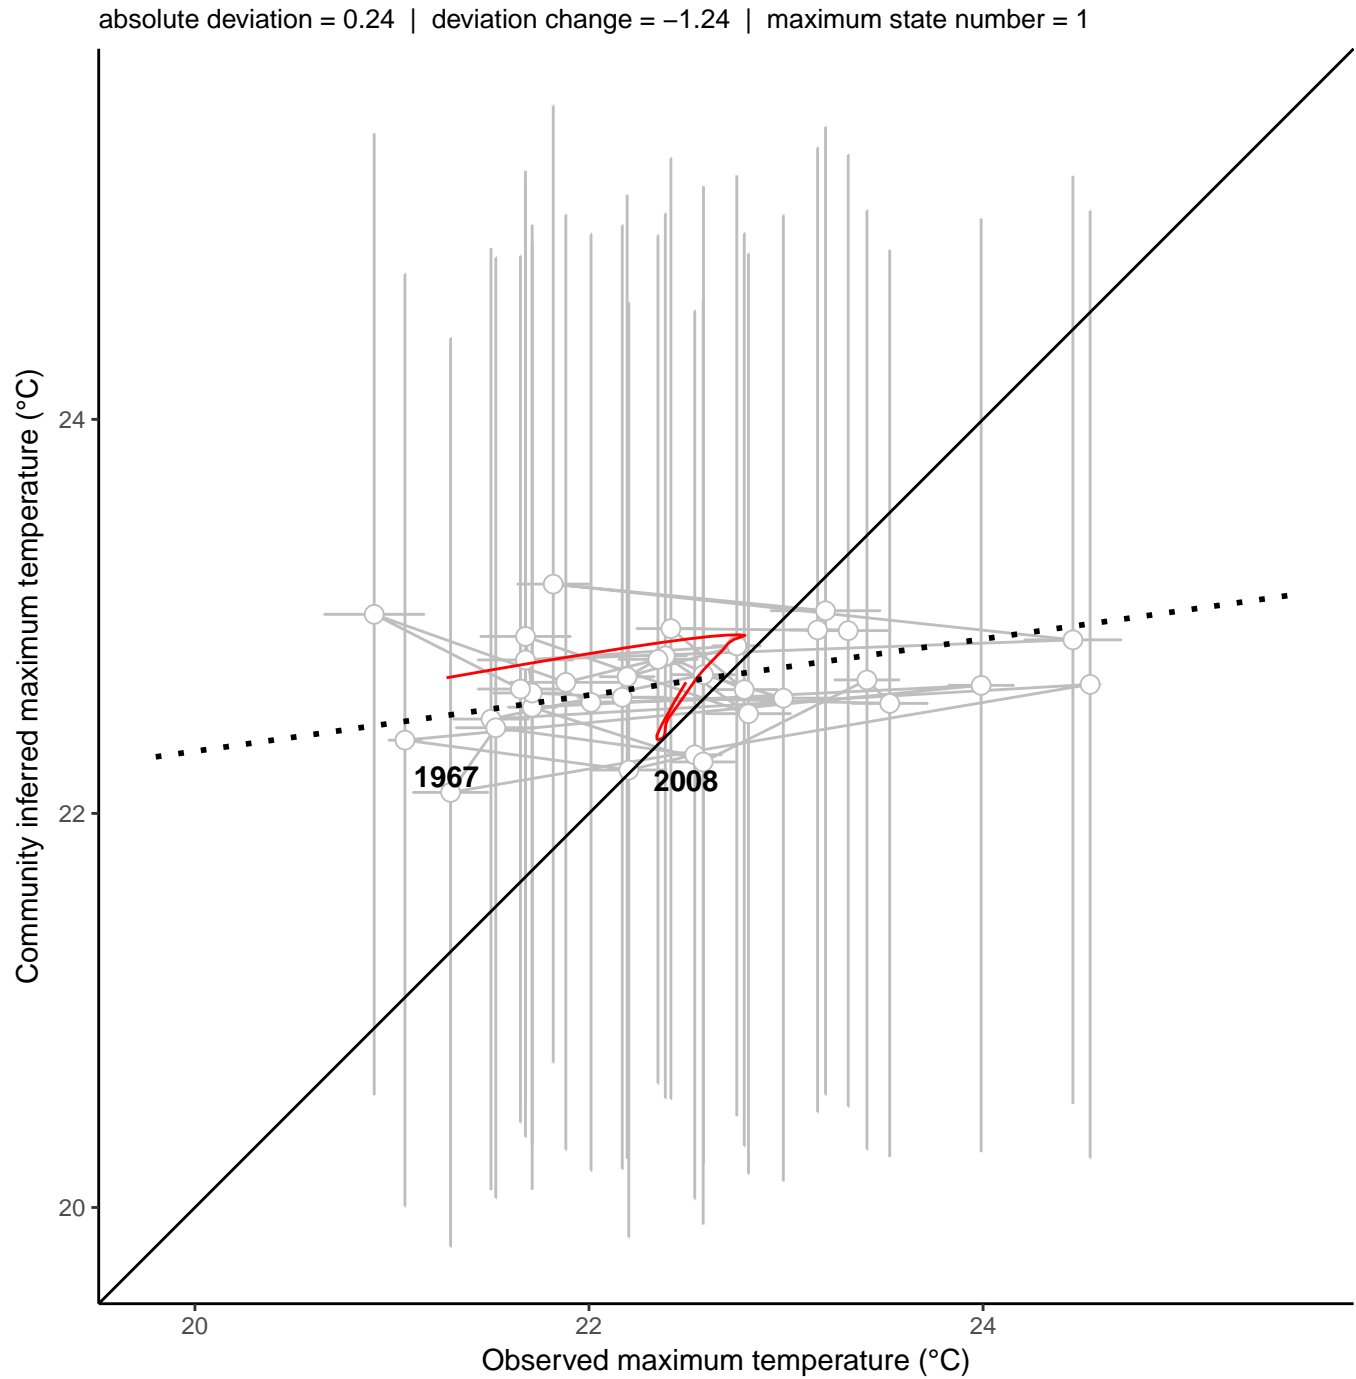

site : 840\_58\_22

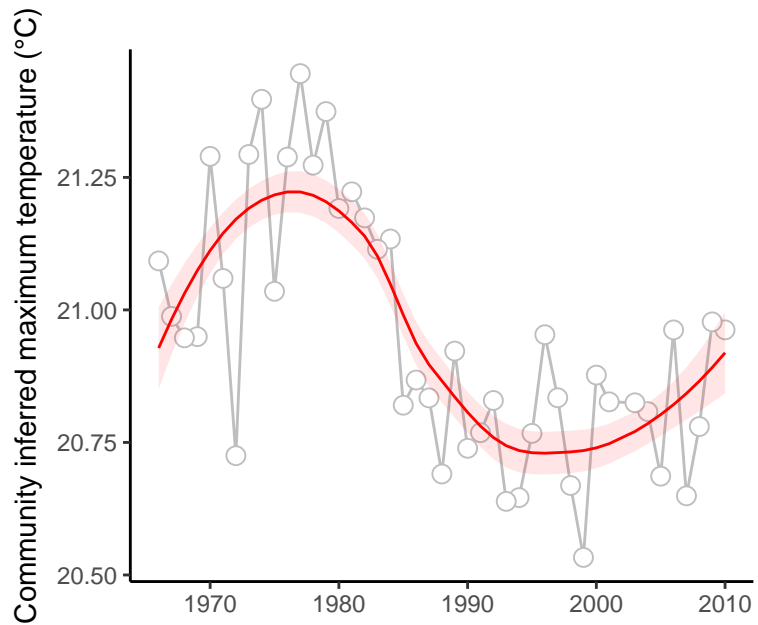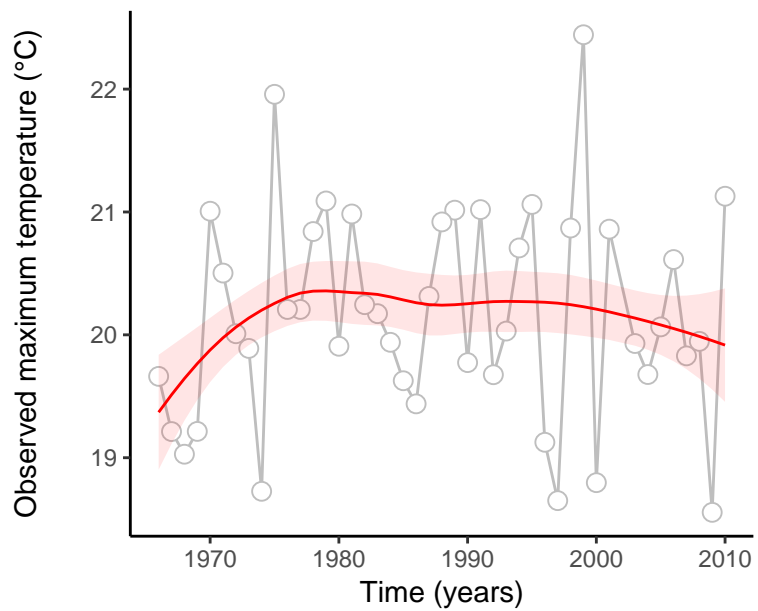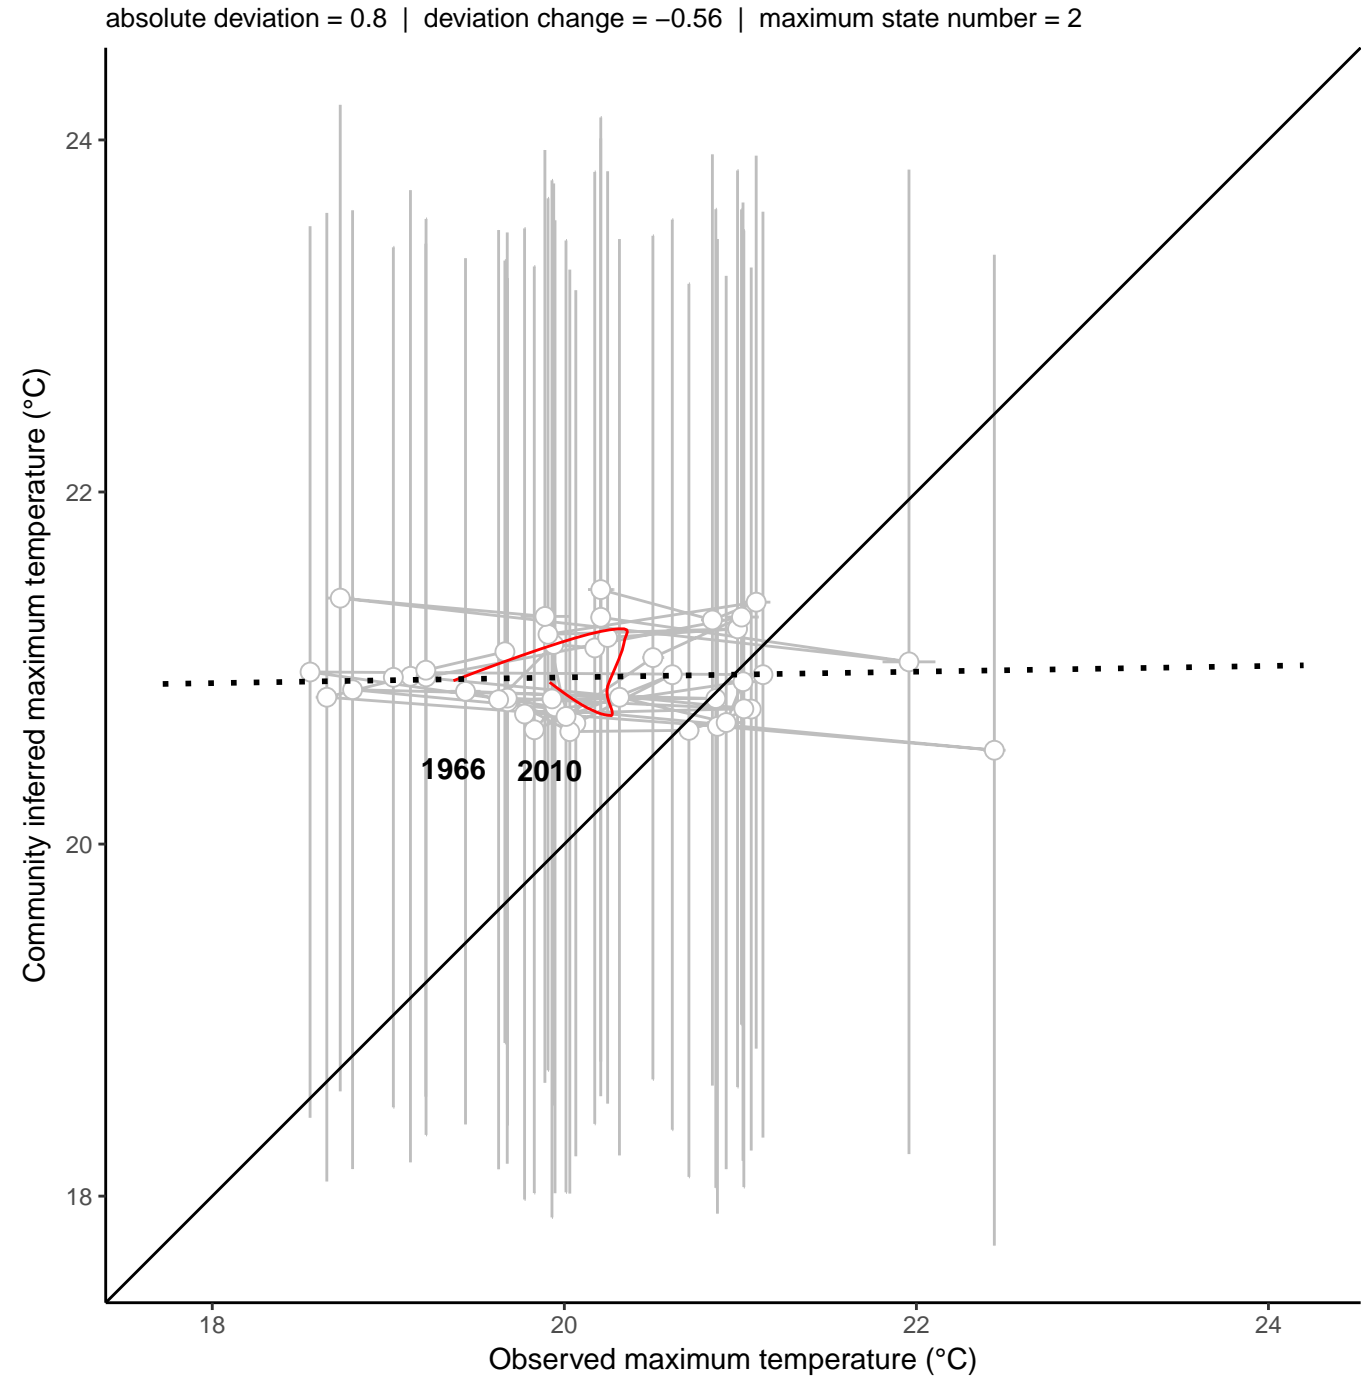

site : 840\_72\_14

absolute deviation = 0.13 | deviation change = 0.09 | maximum state number = 2

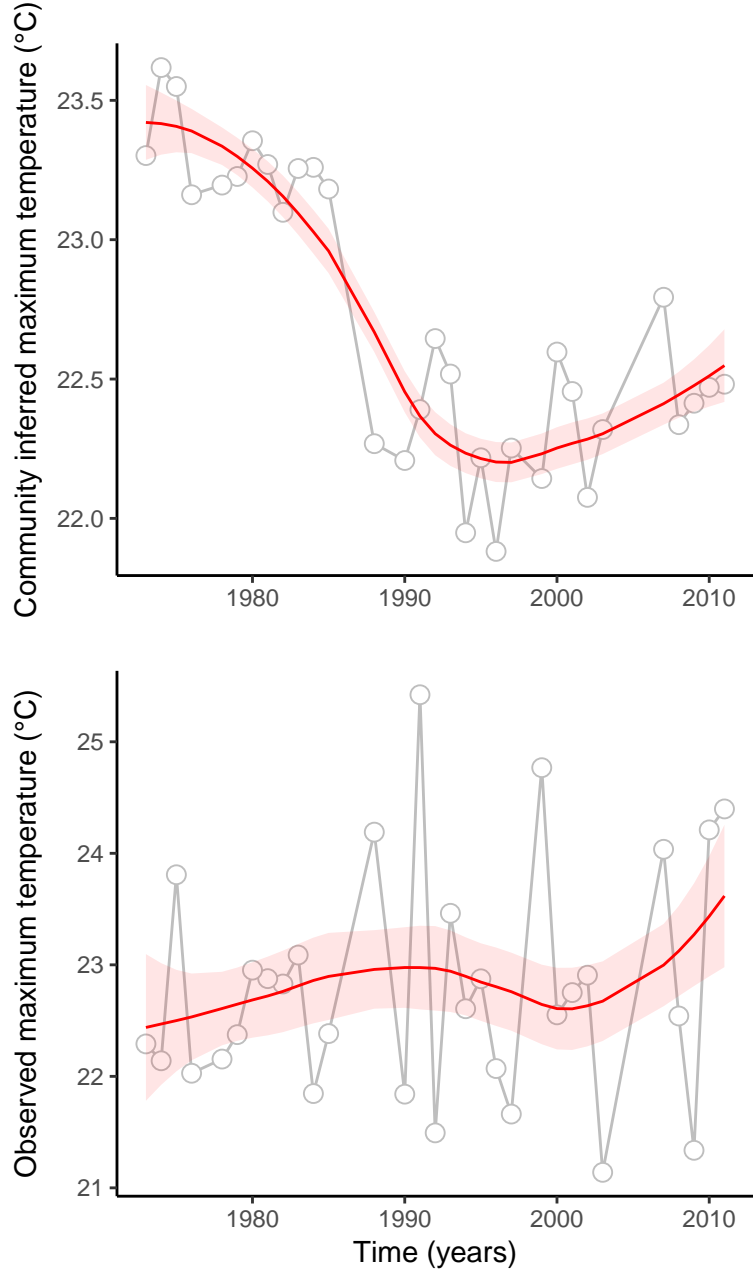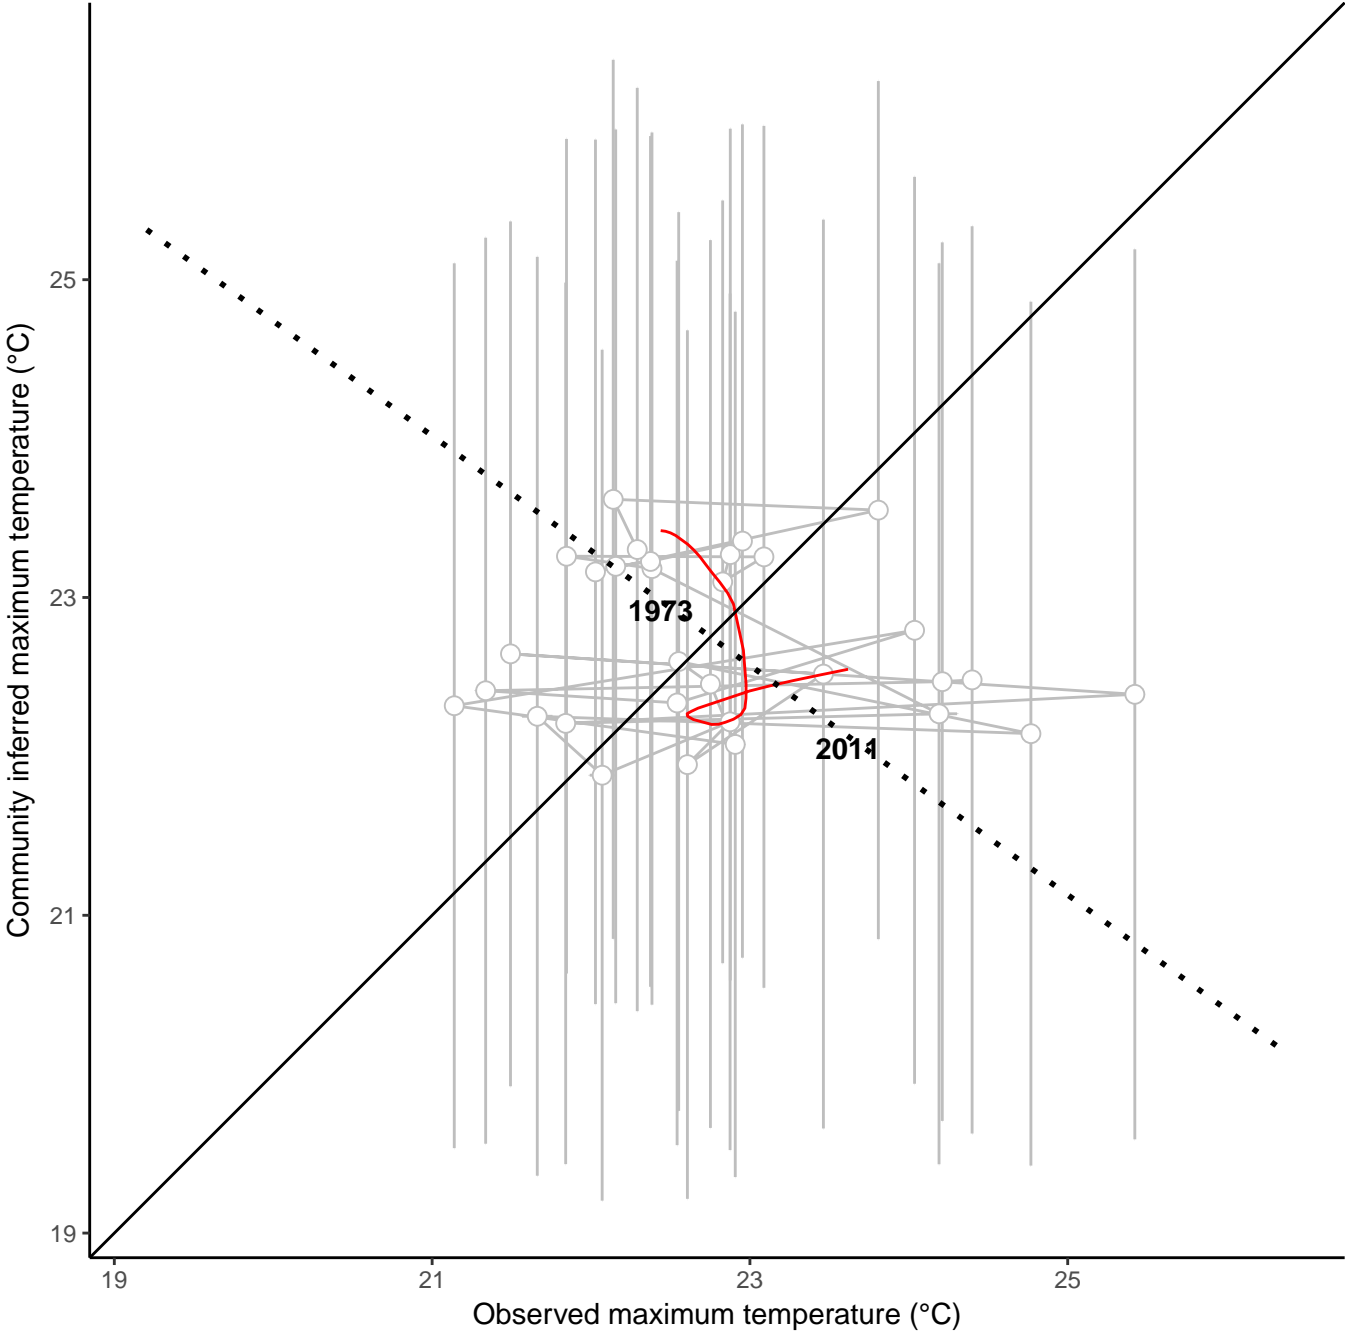

site : 840\_49\_17

absolute deviation = 0.58 | deviation change = -0.01 | maximum state number = 1

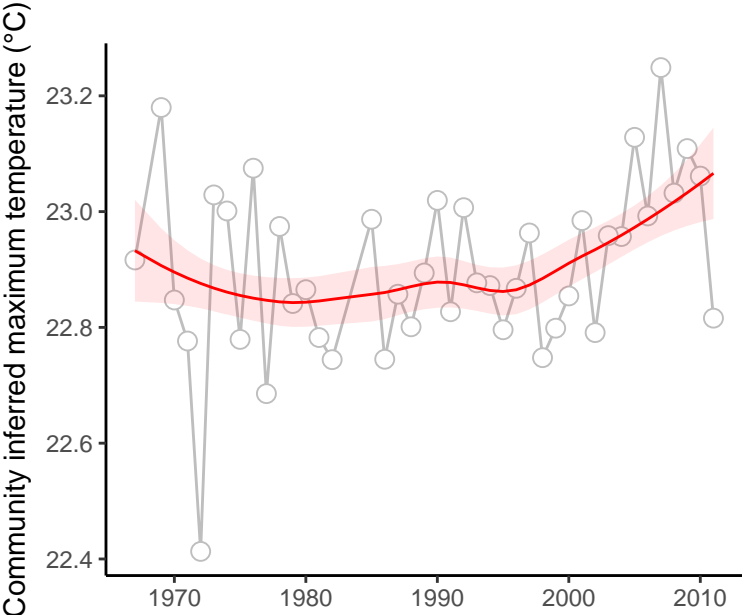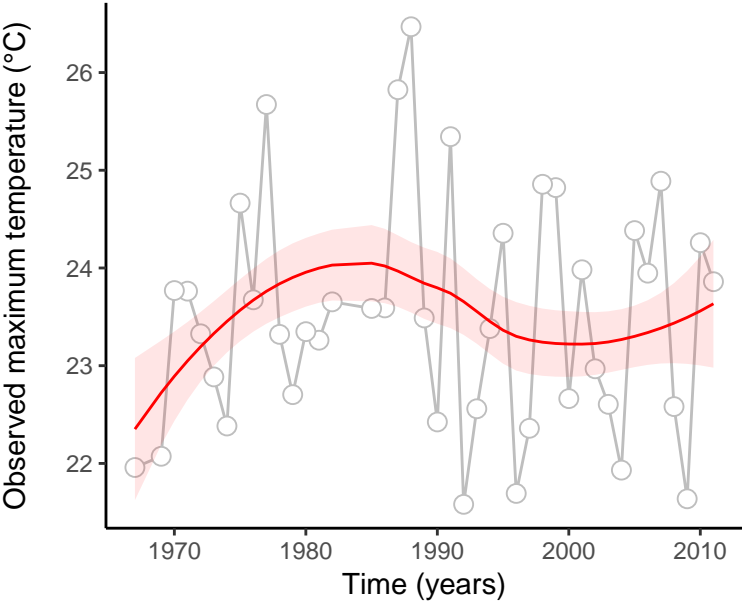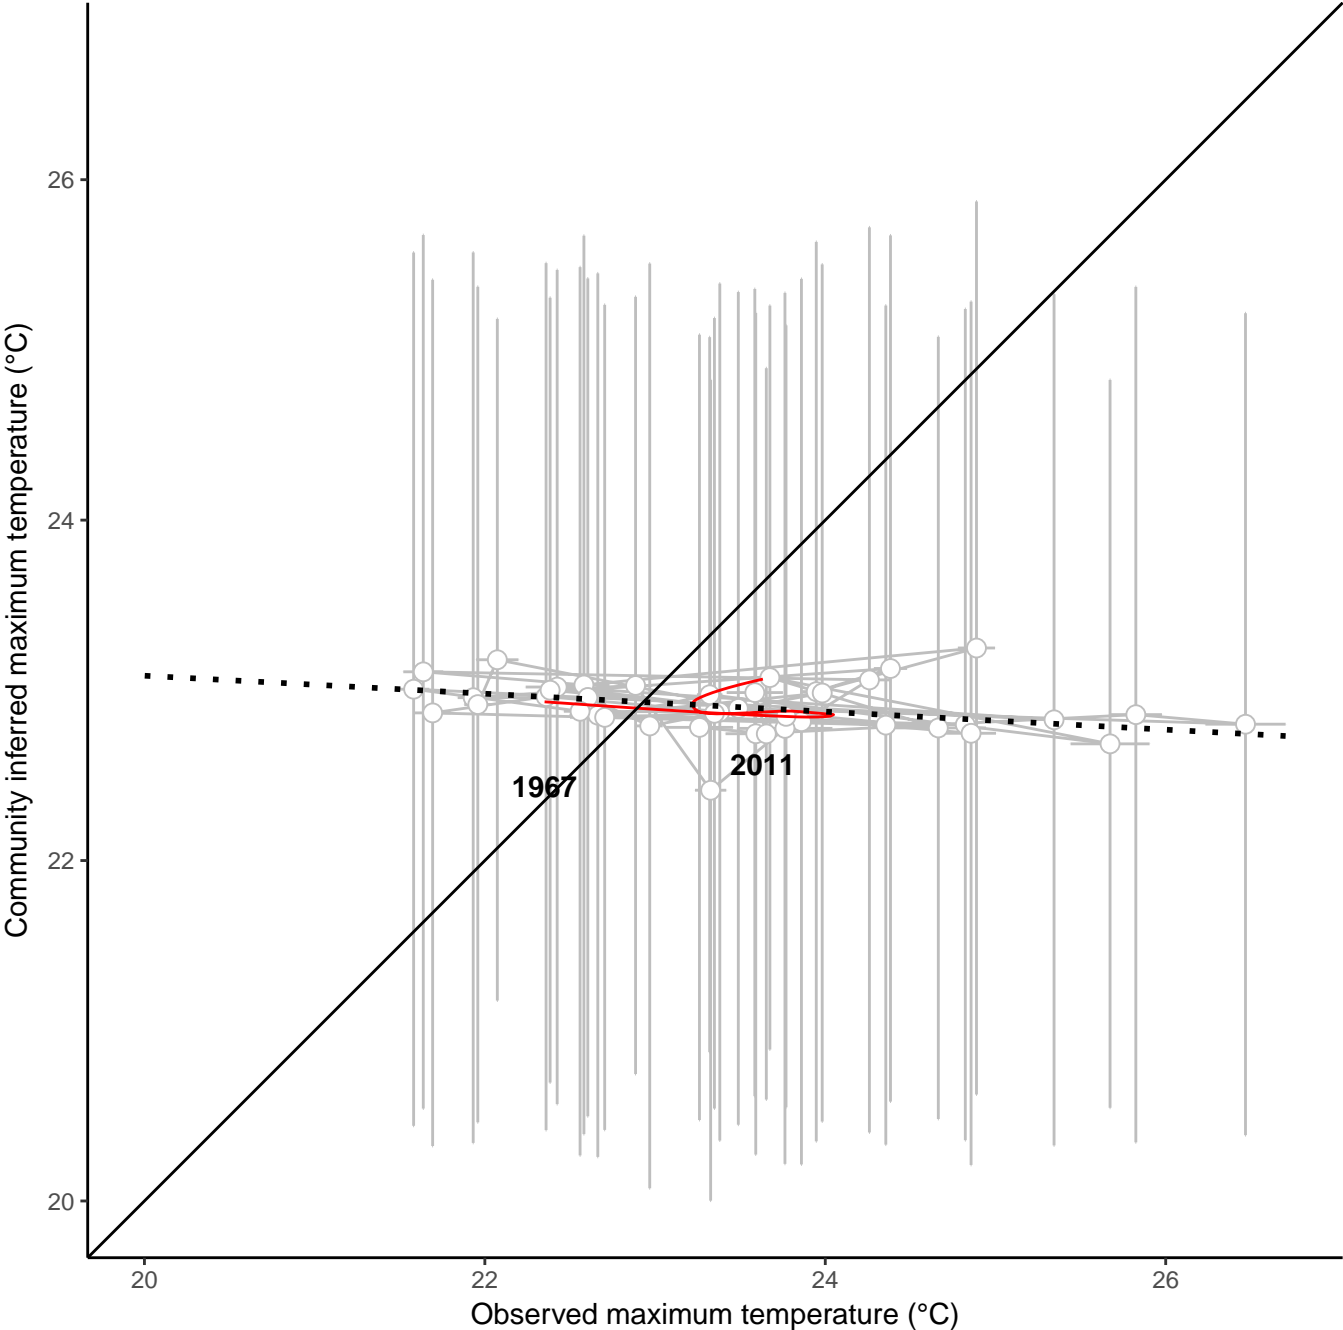

site : 840\_91\_21

absolute deviation = 0.75 | deviation change = -0.57 | maximum state number = 1

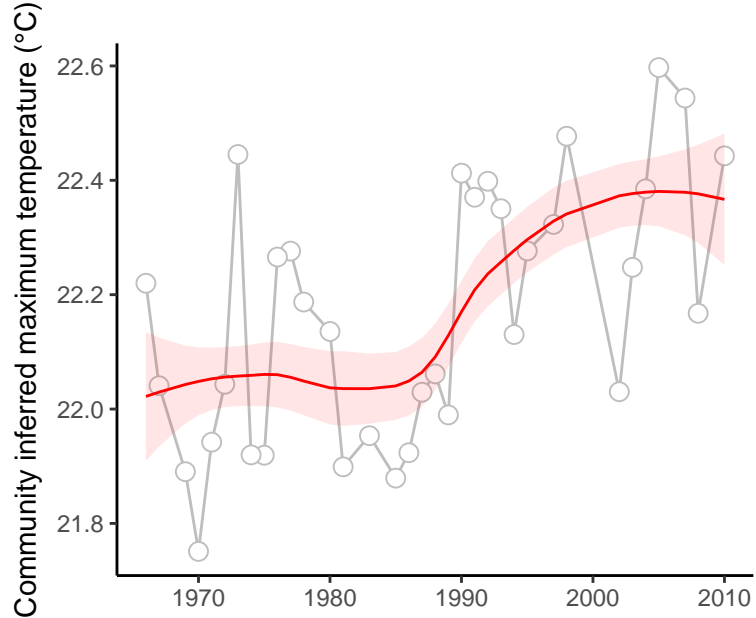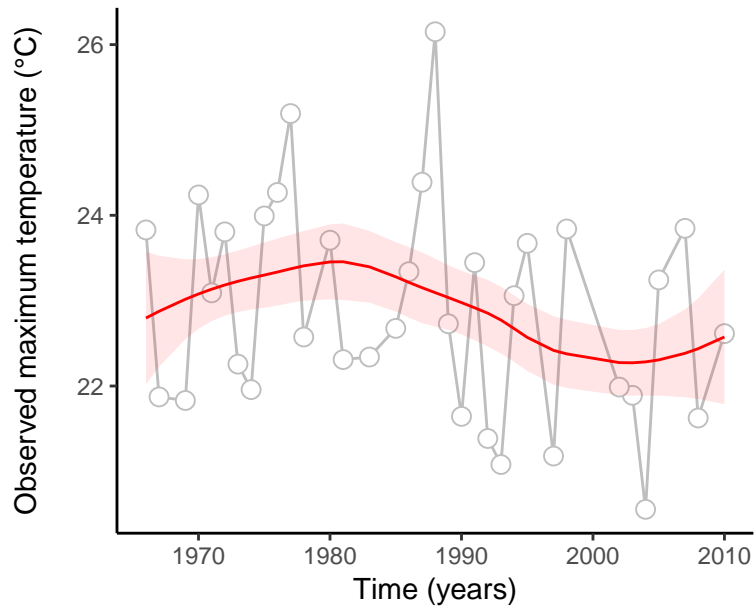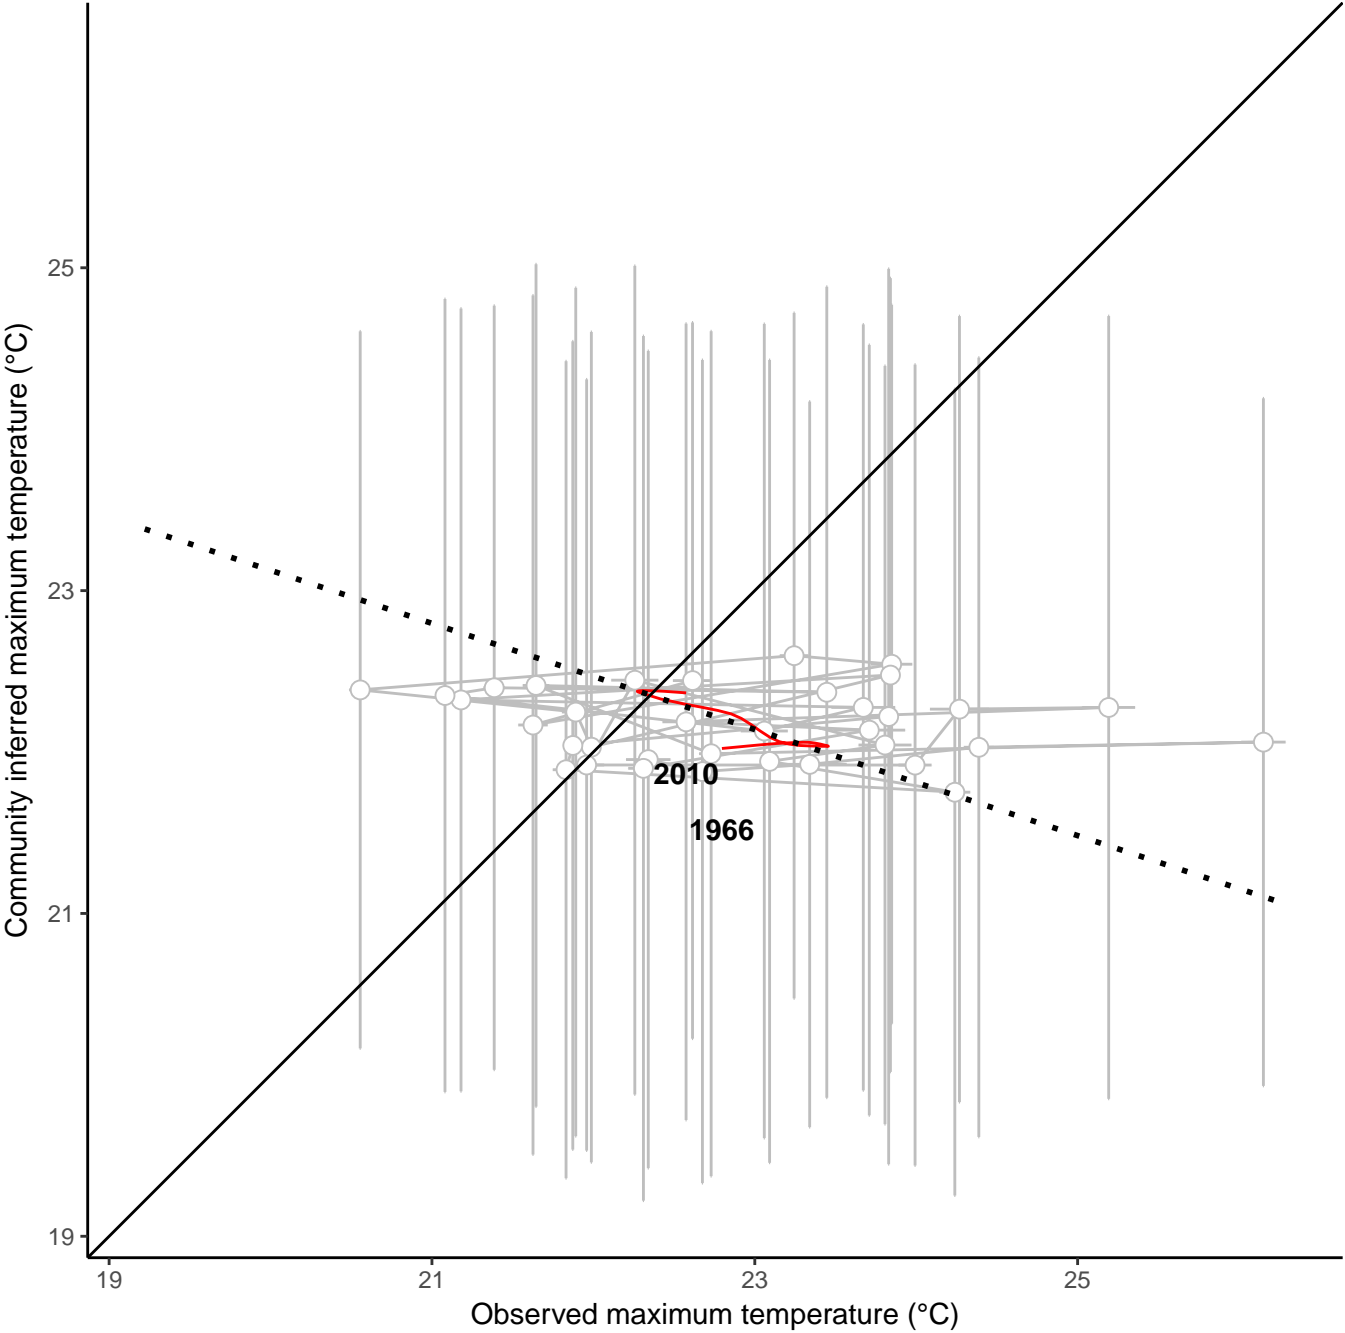

site : 840\_61\_88

absolute deviation = 0.15 | deviation change = -0.91 | maximum state number = 2

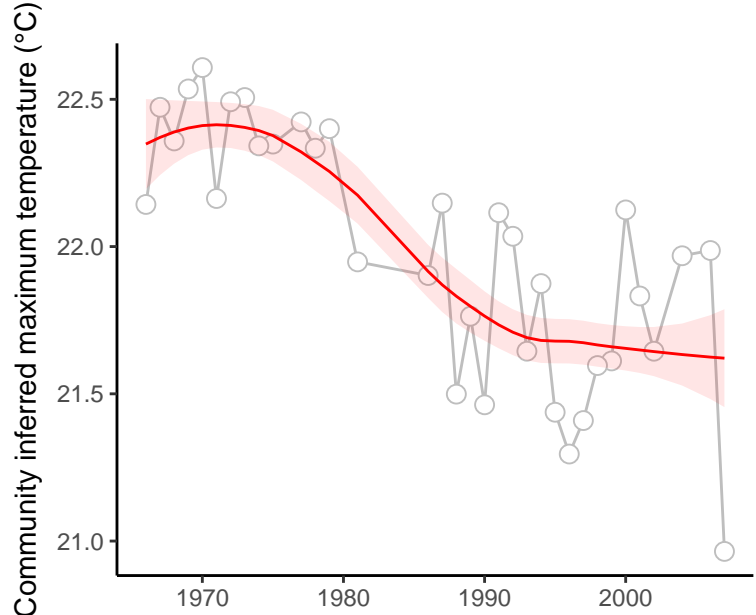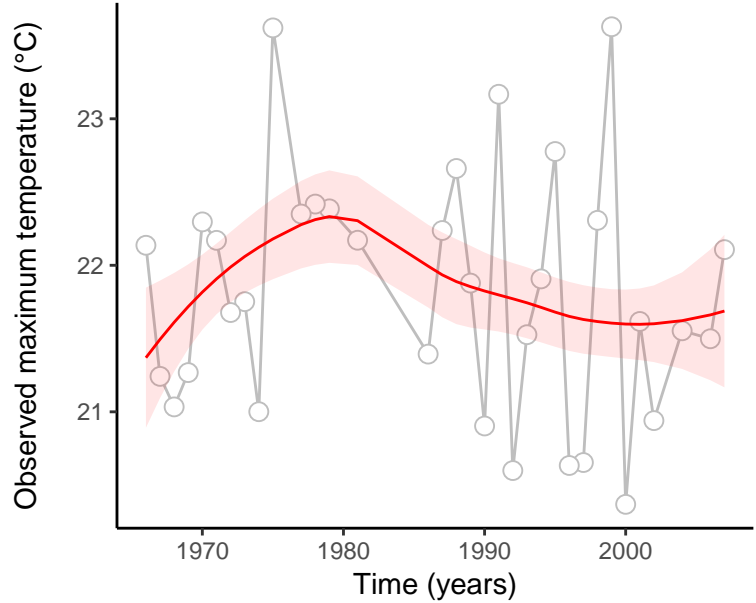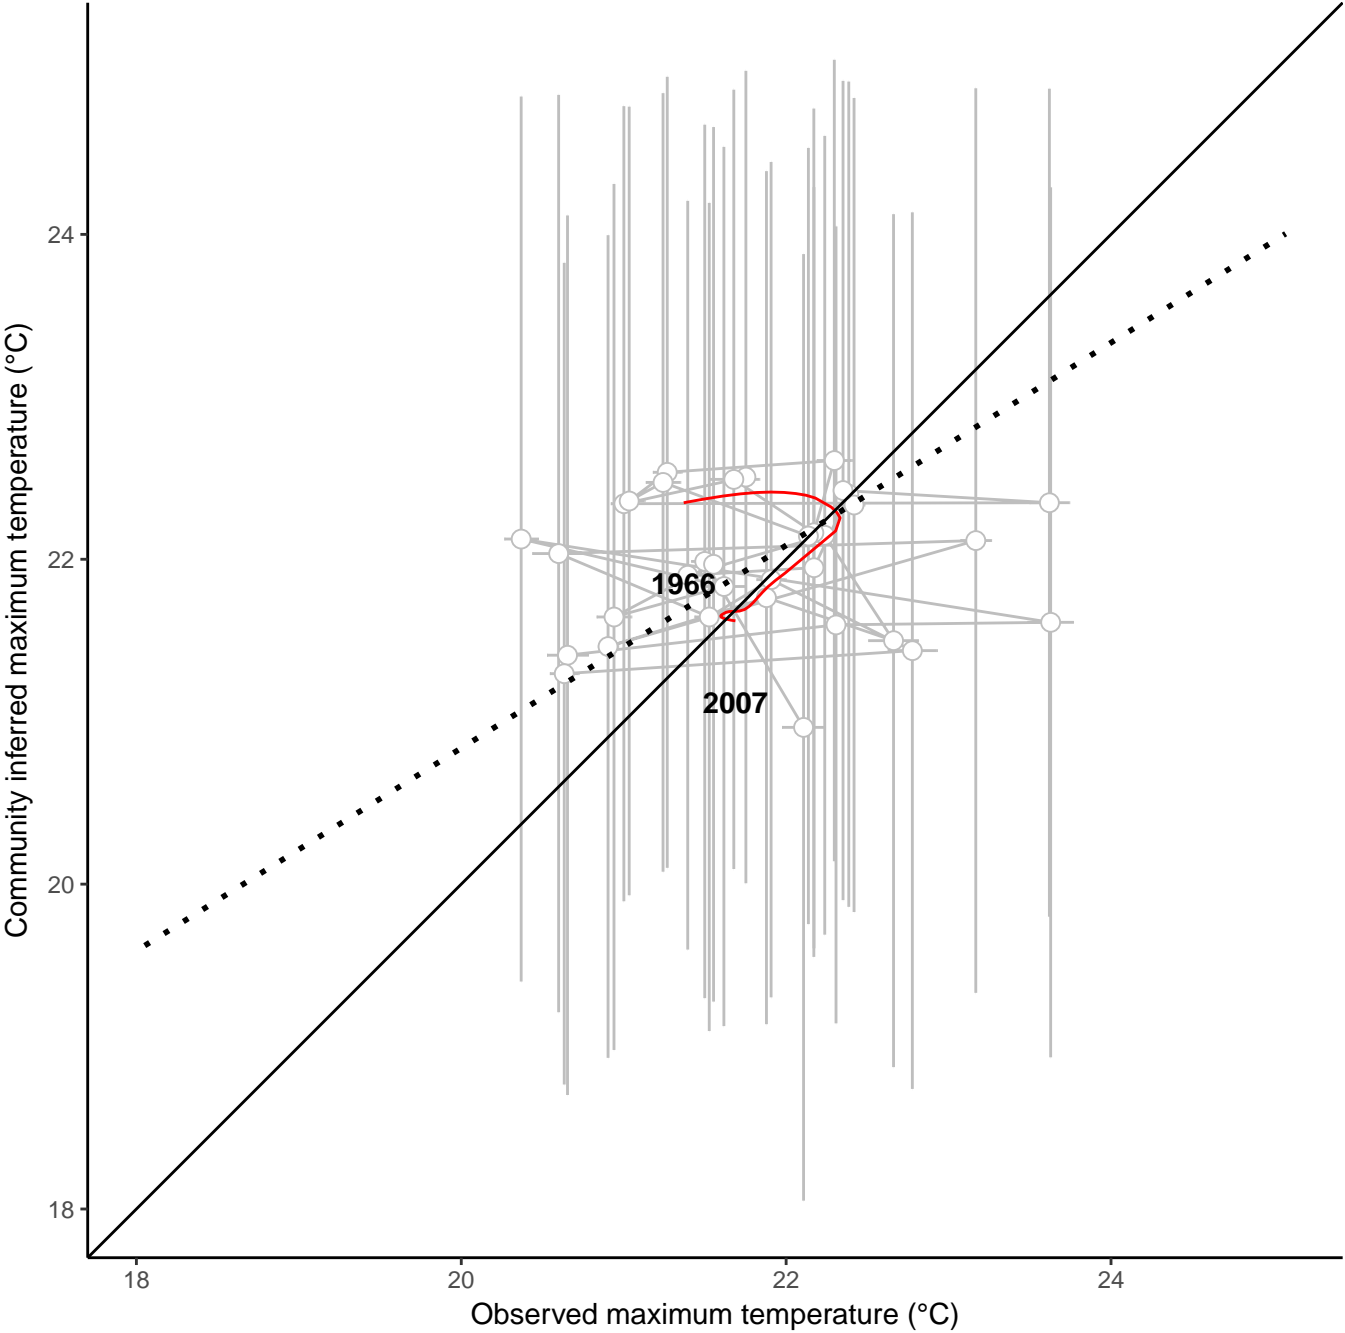



site : 840\_44\_14

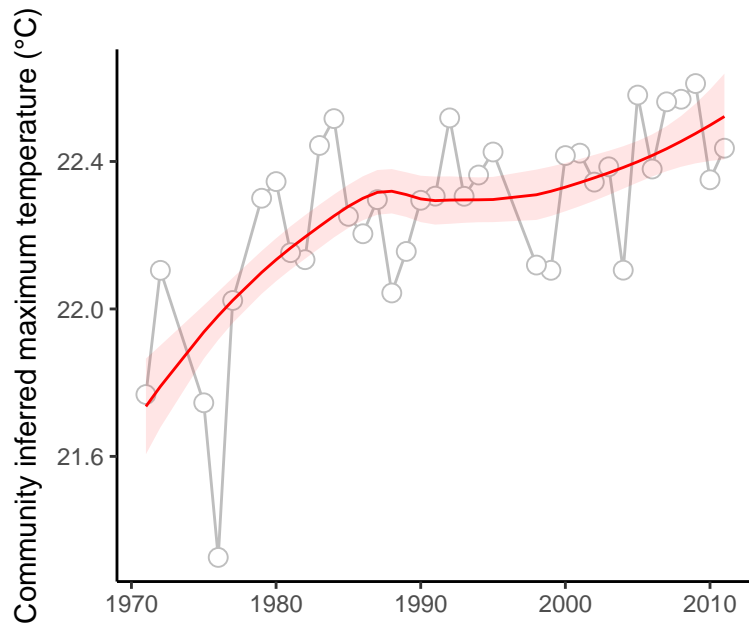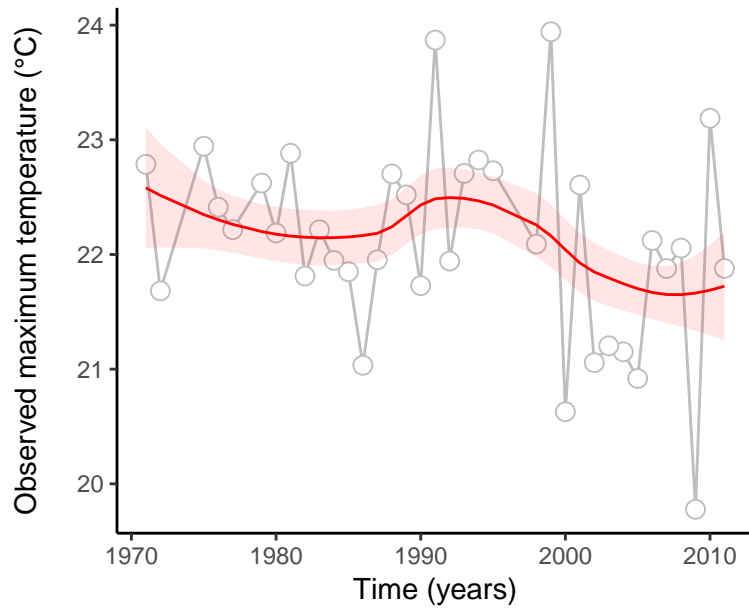

absolute deviation = 0.14 | deviation change = -0.05 | maximum state number = 1

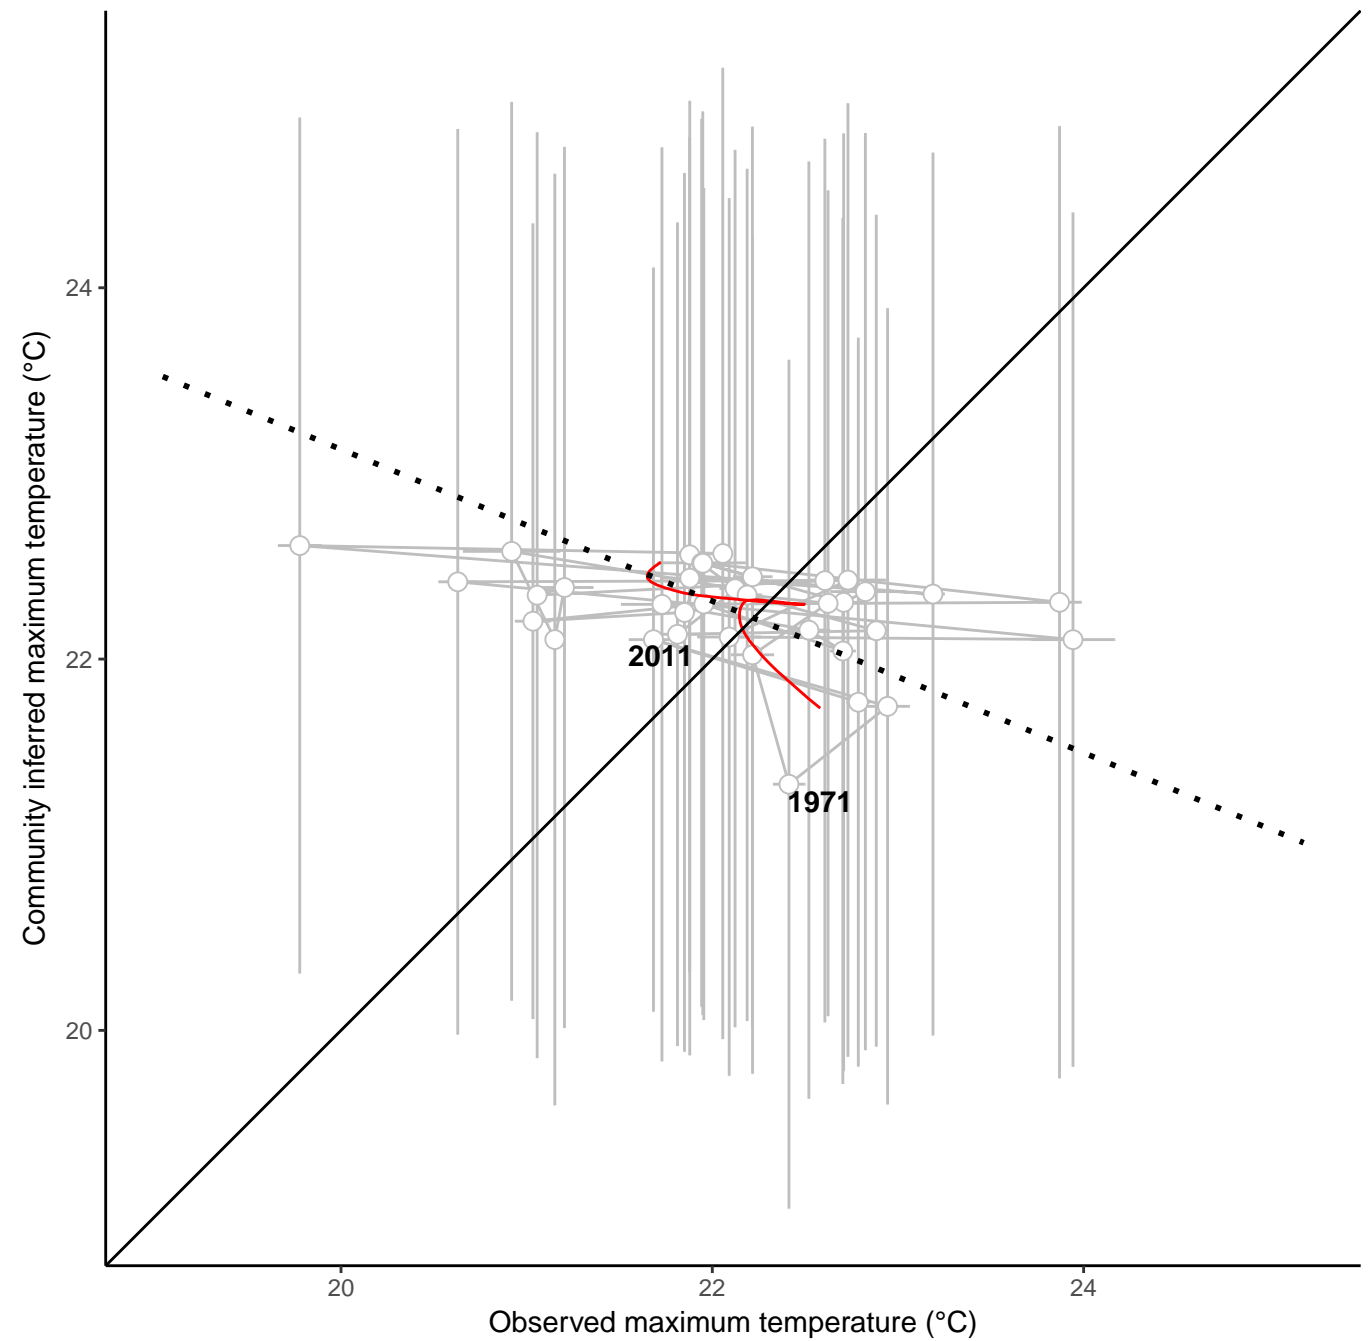

site : 840\_58\_8

absolute deviation = 0.62 | deviation change = -0.41 | maximum state number = 2

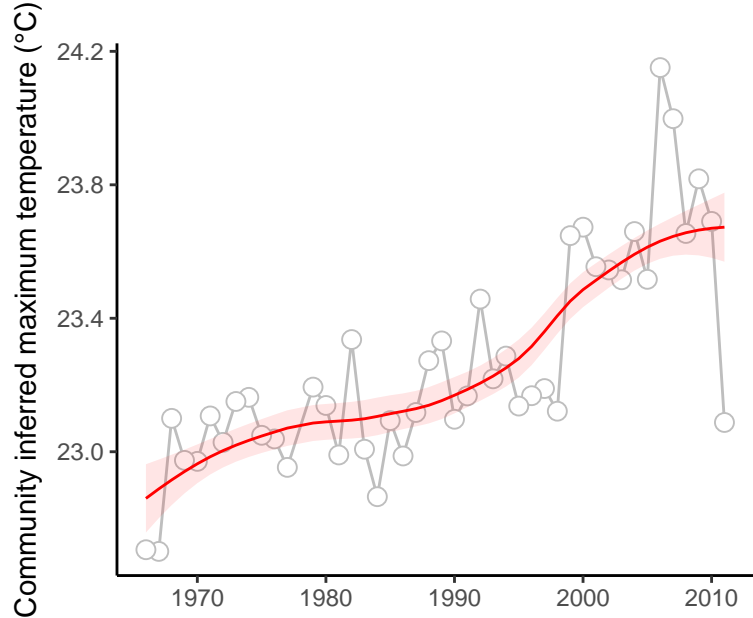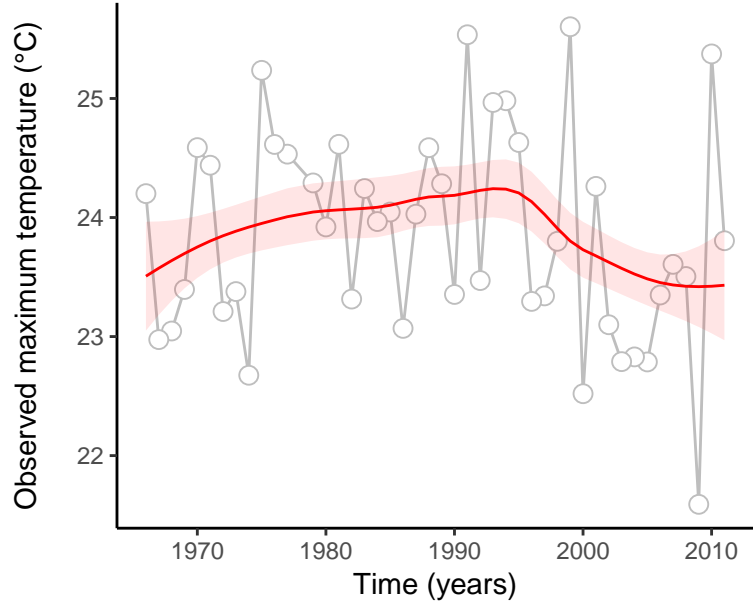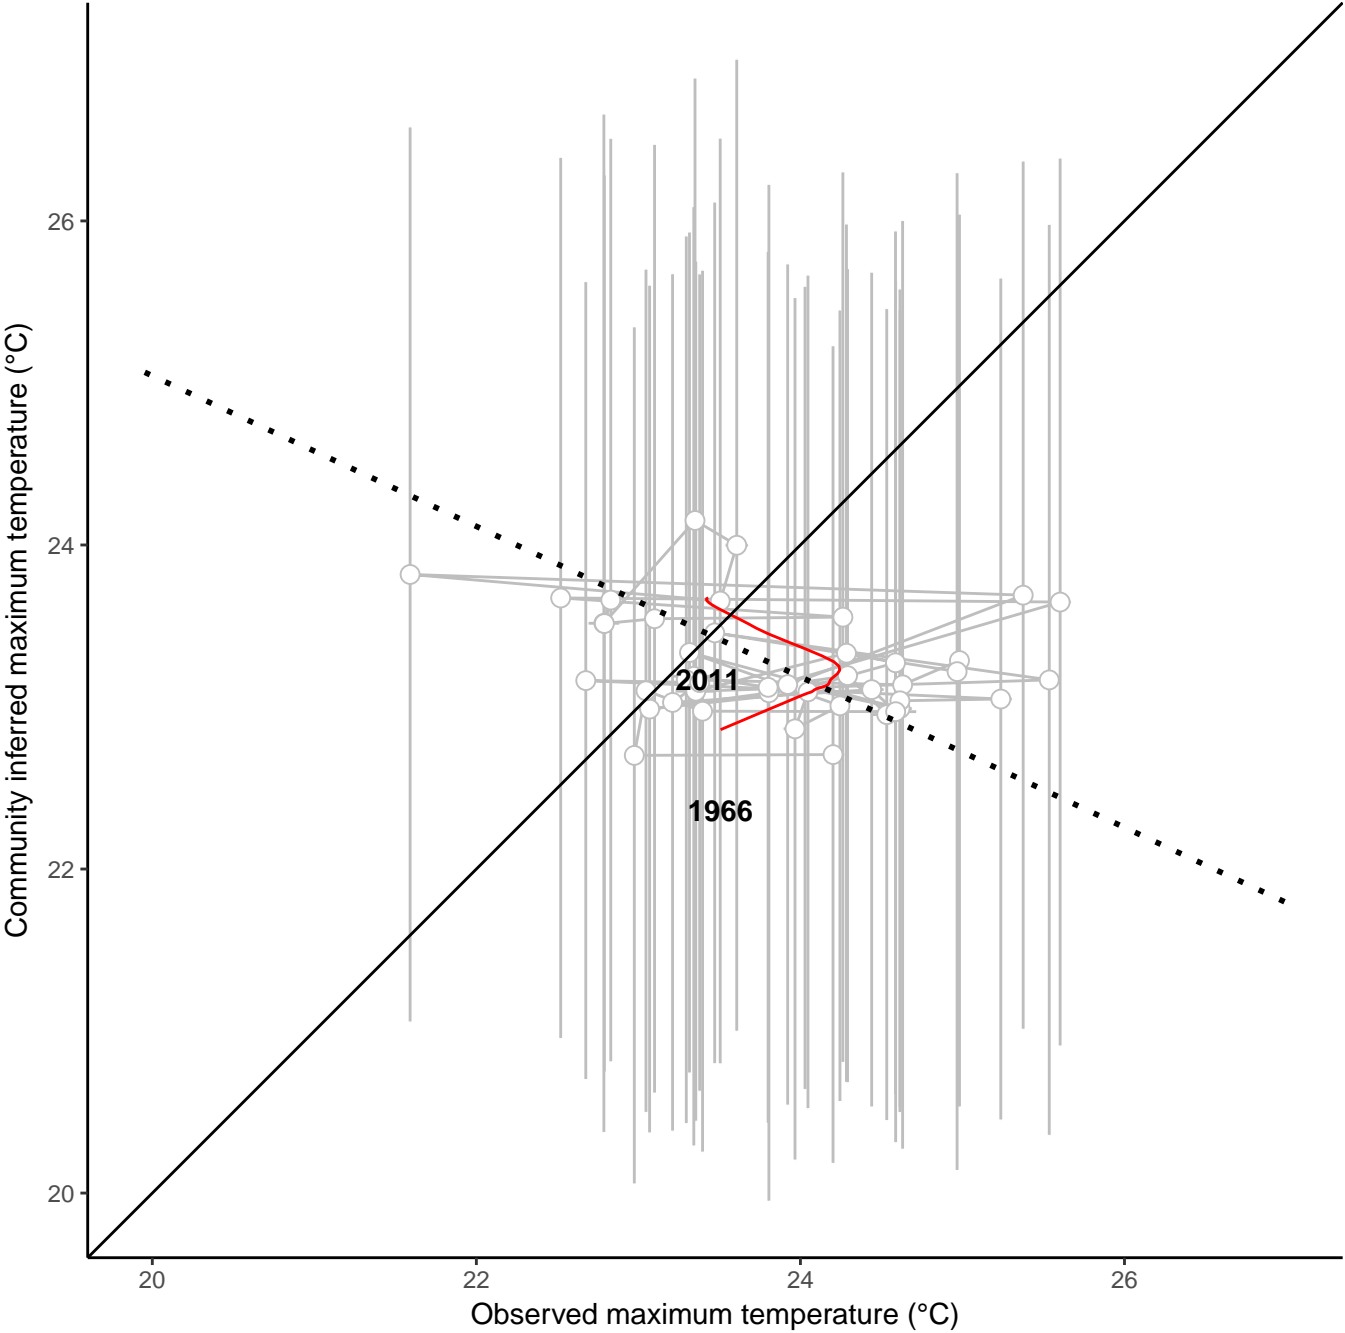

site : 840\_50\_37

absolute deviation = 0.92 | deviation change = -1.48 | maximum state number = 1

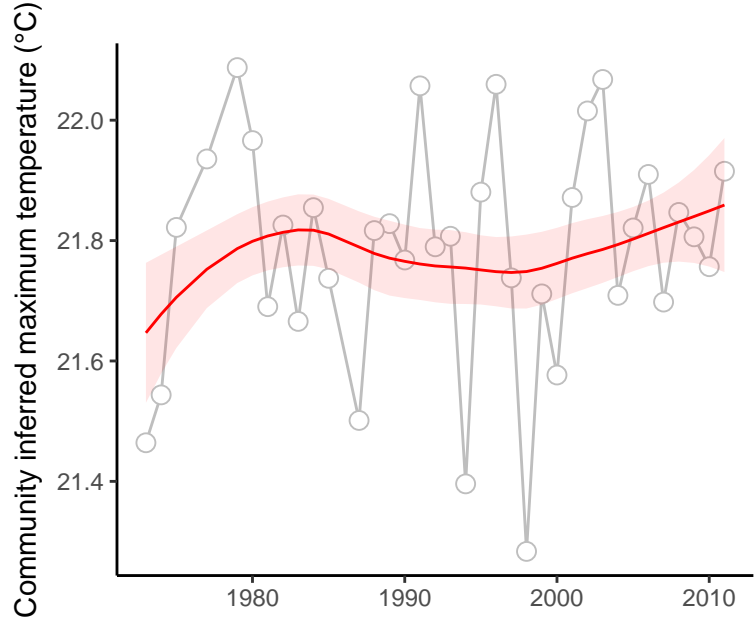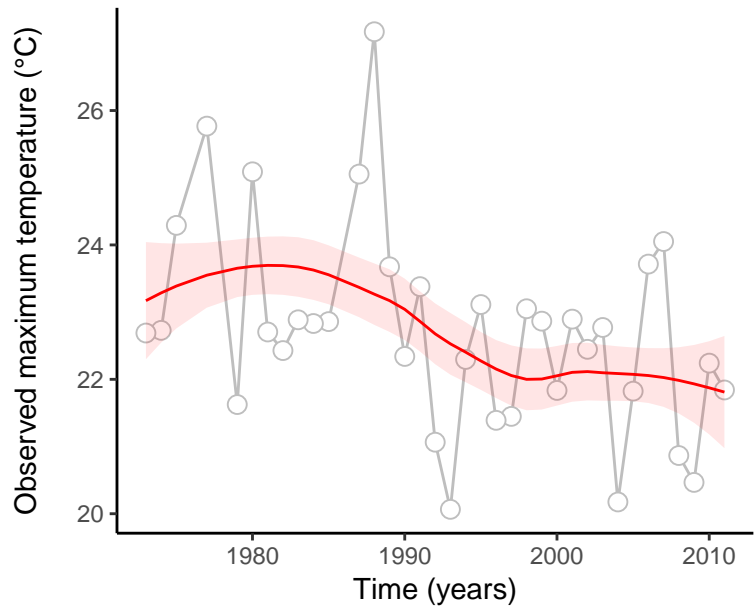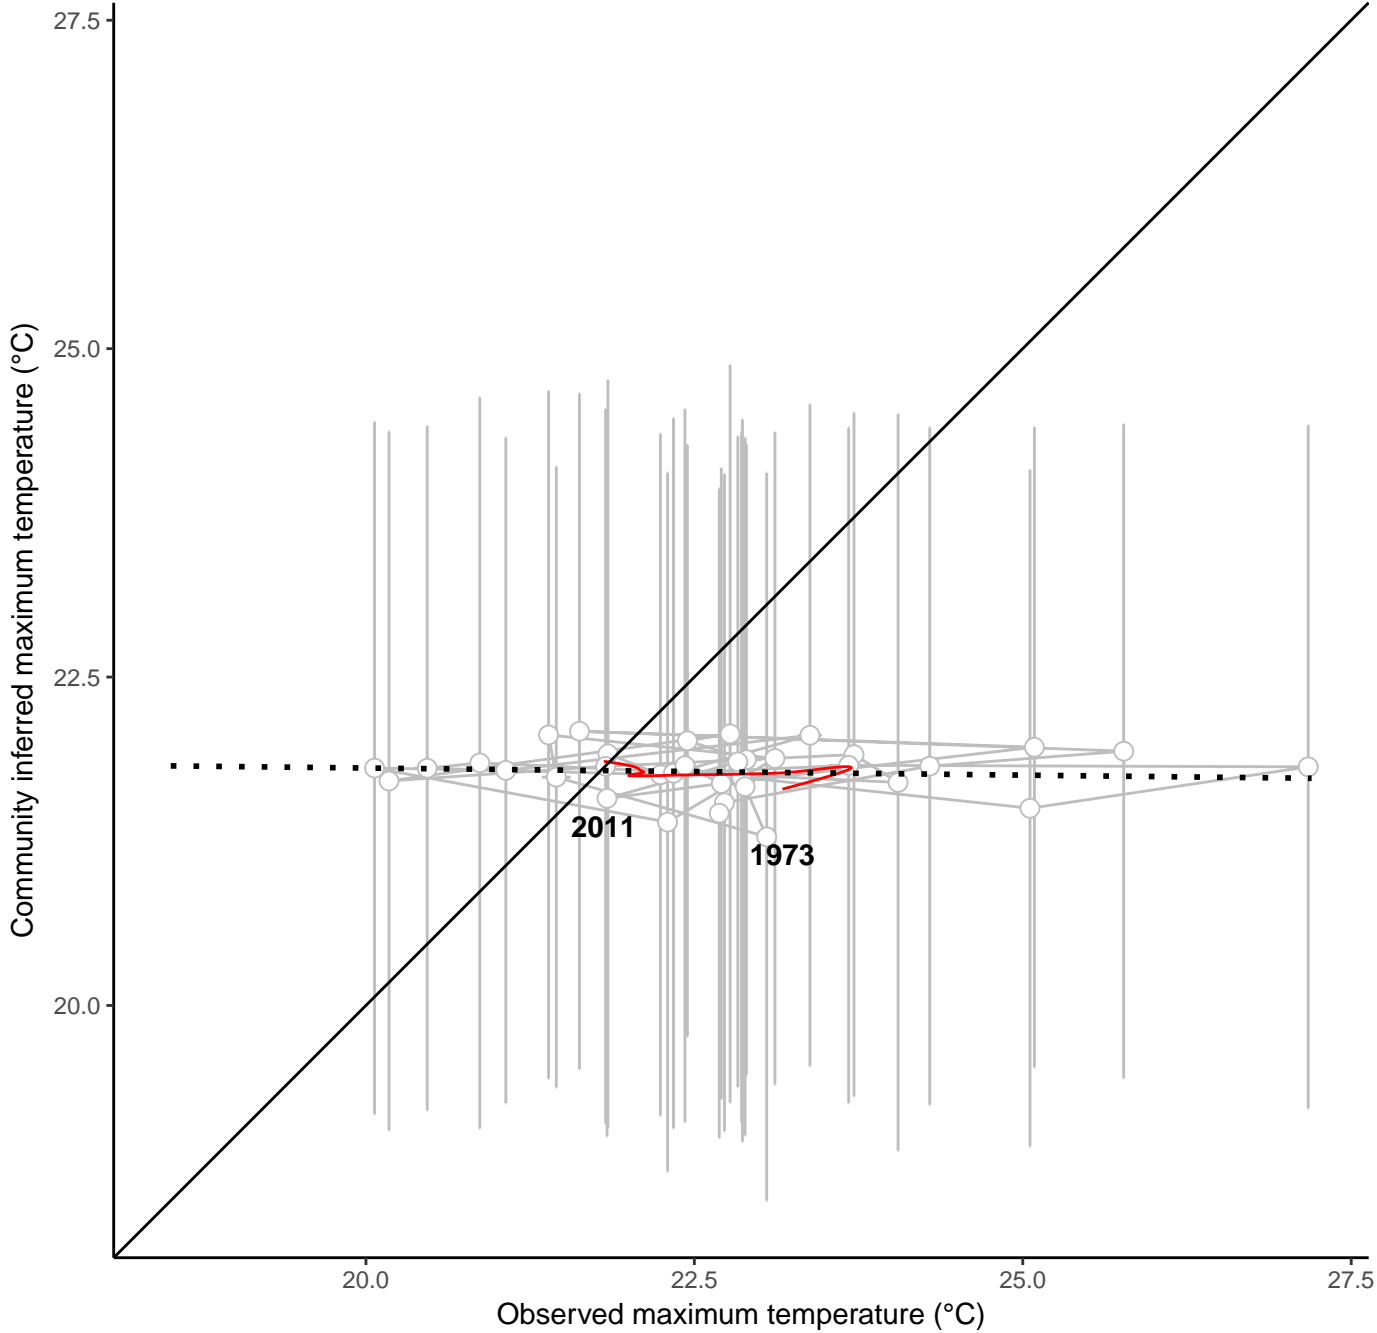

site : 840\_47\_19

absolute deviation = 1.14 | deviation change = 0.68 | maximum state number = 1

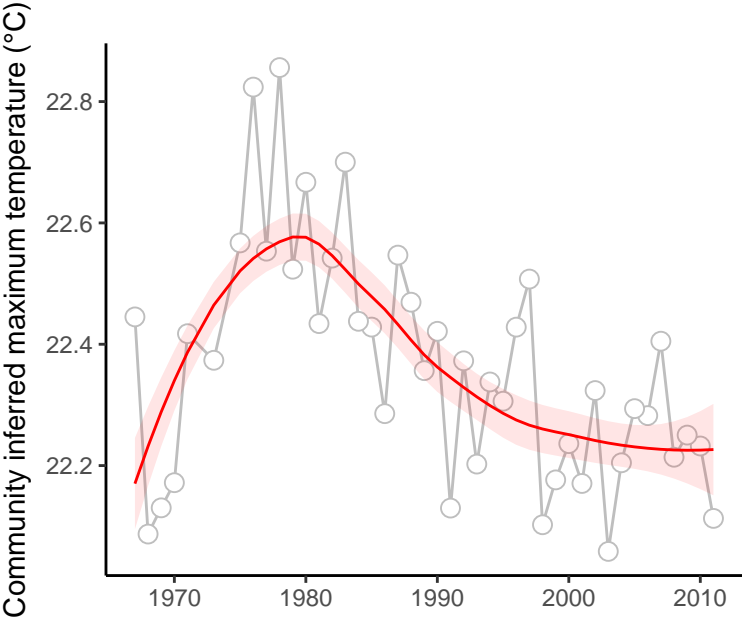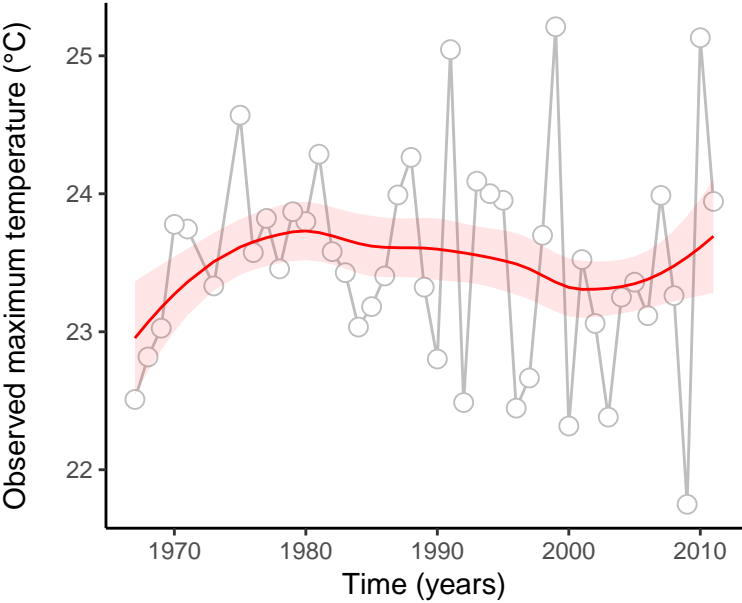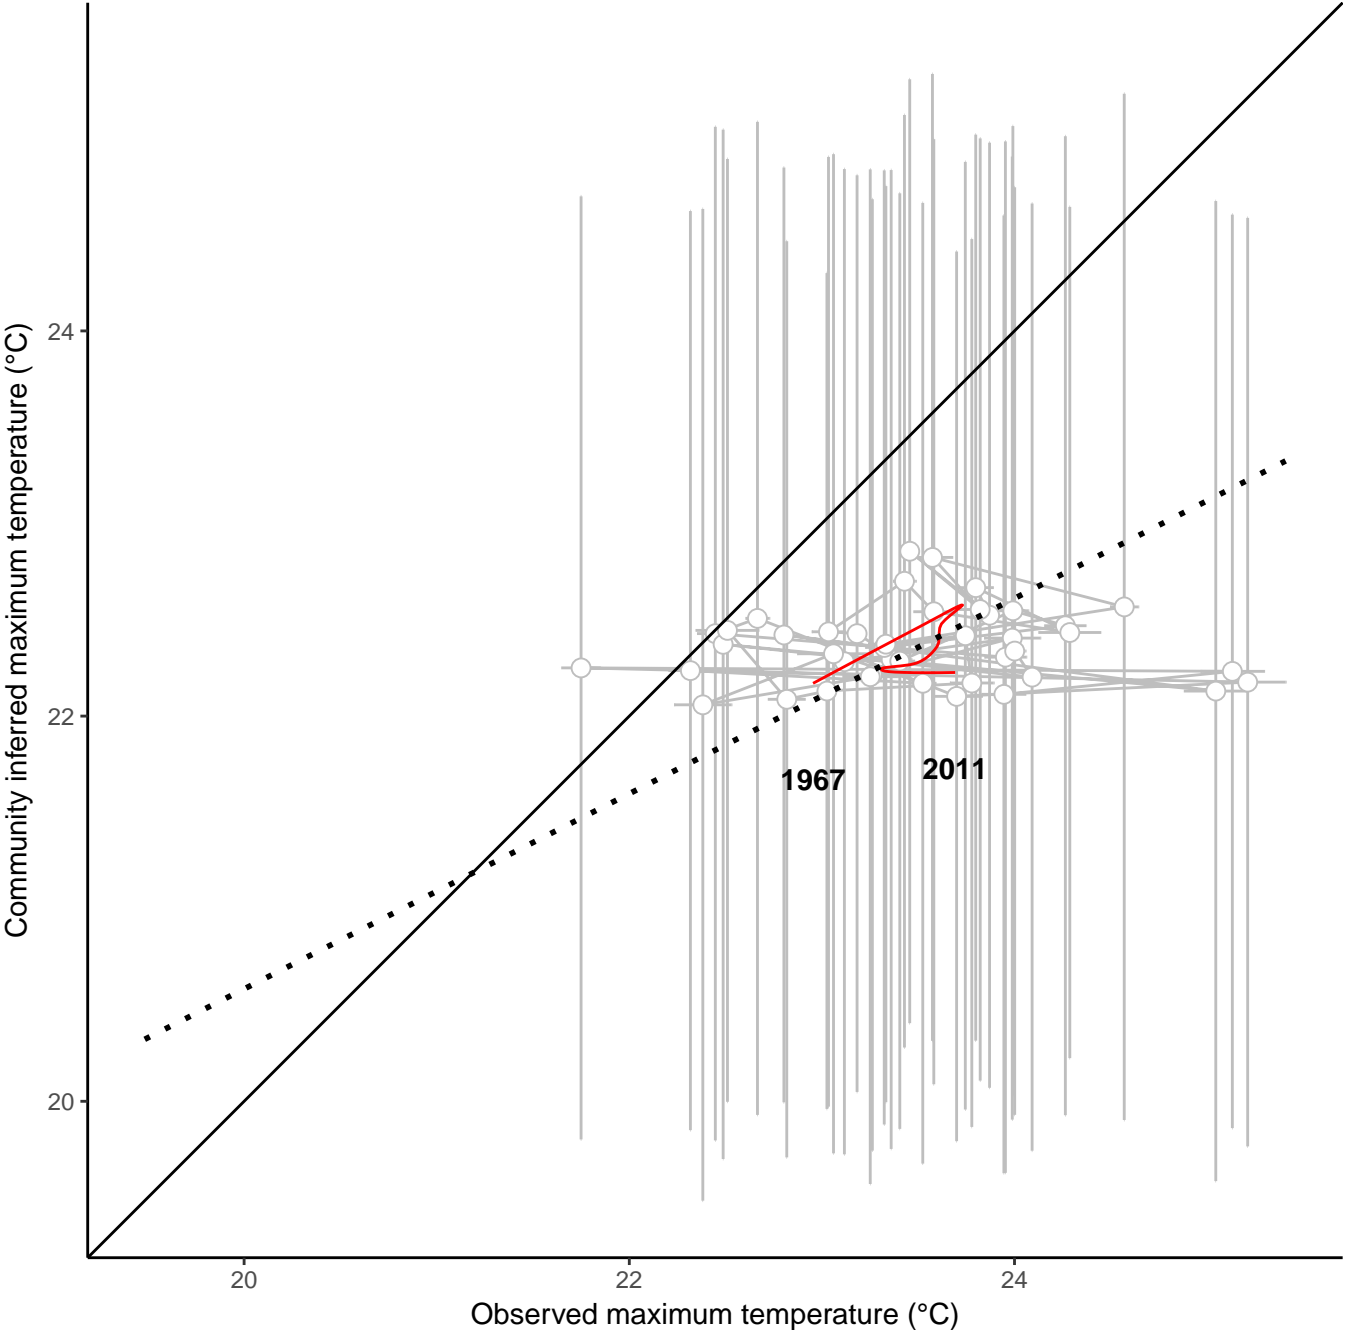

site : 840\_50\_34

absolute deviation = 0.03 | deviation change = -1.12 | maximum state number = 1

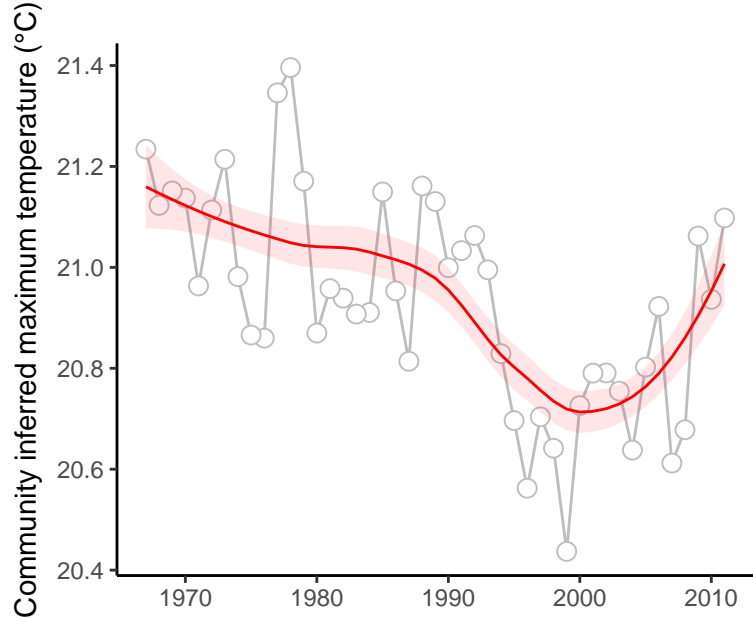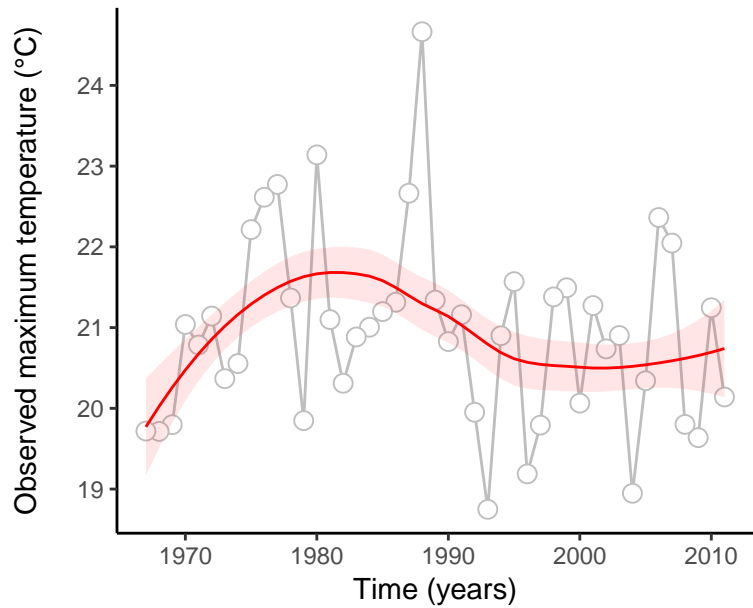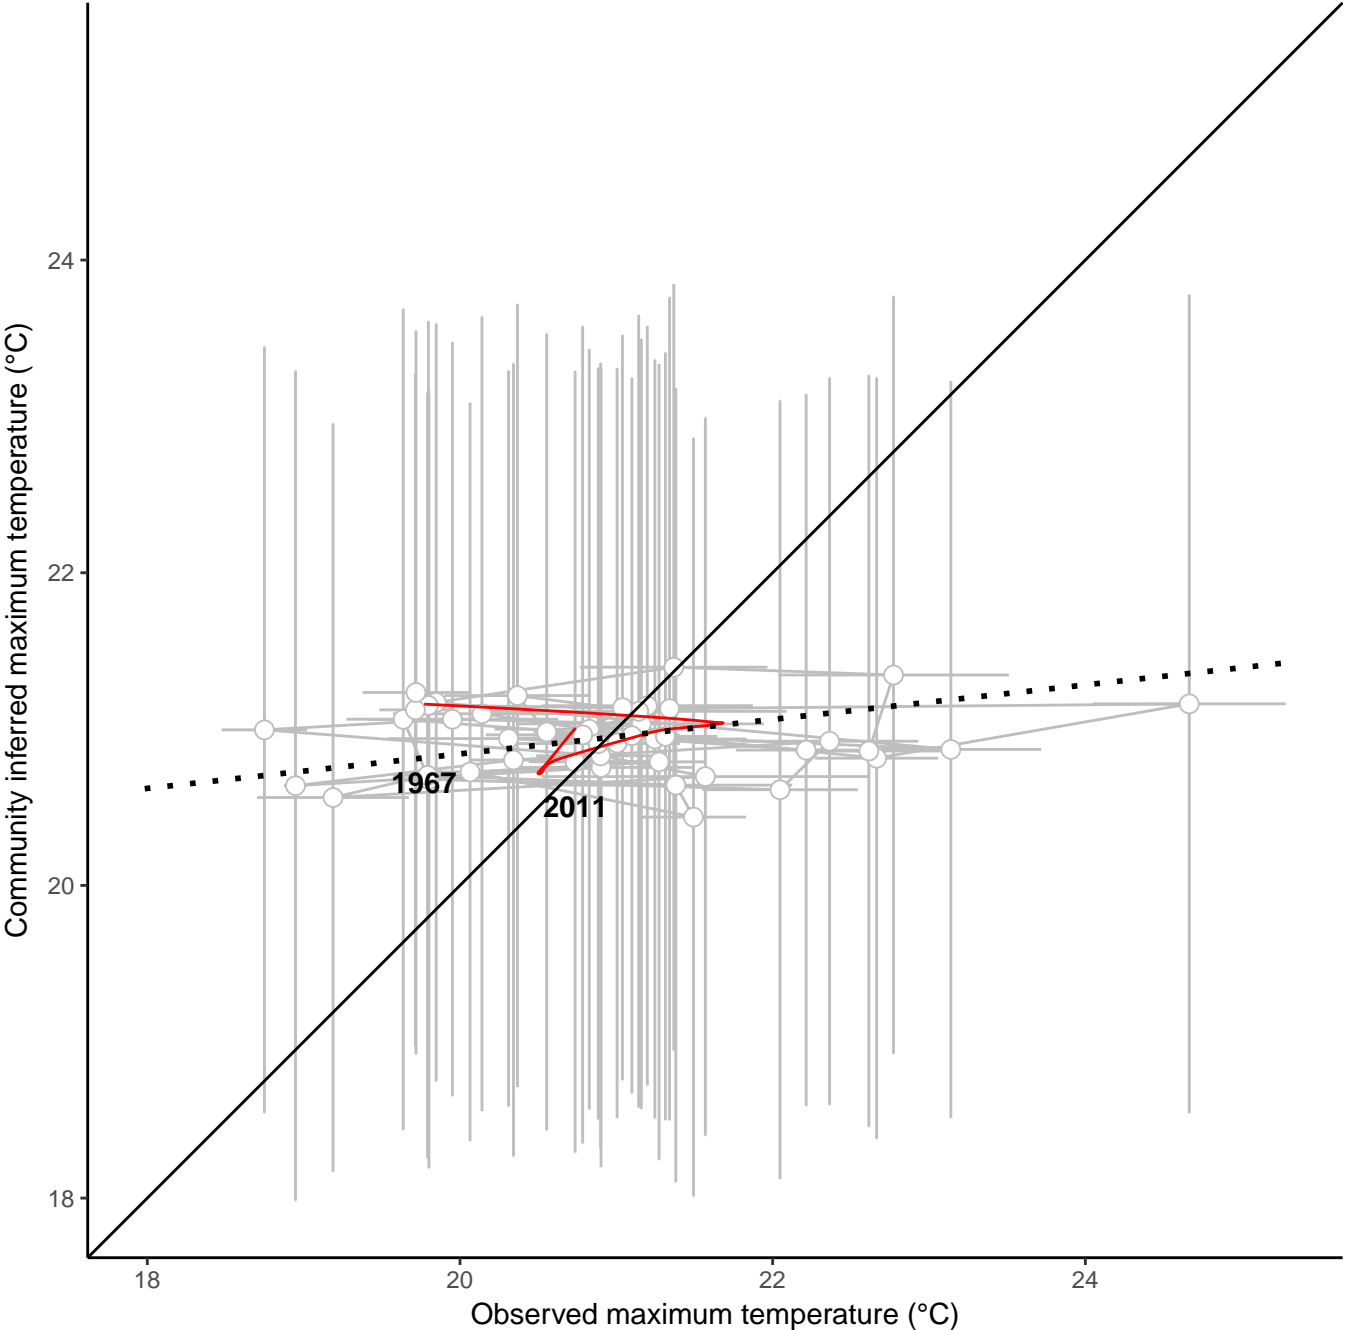

site : 840\_58\_1

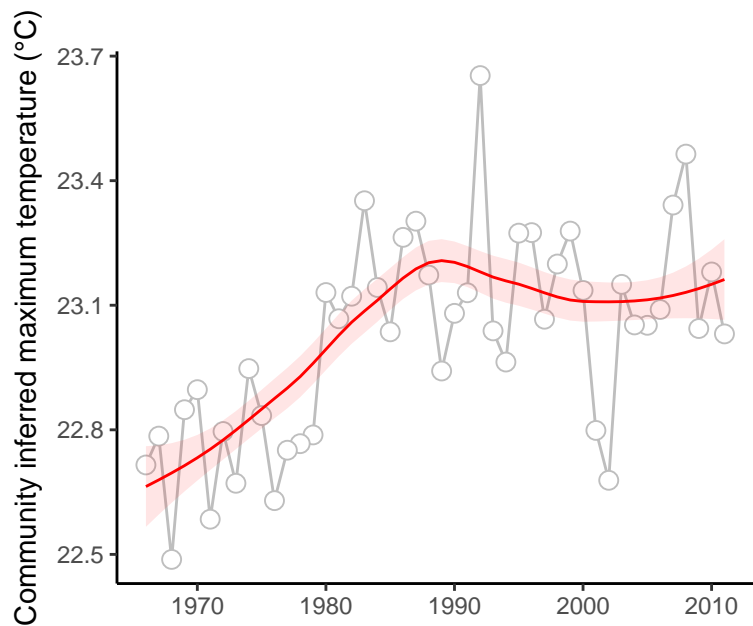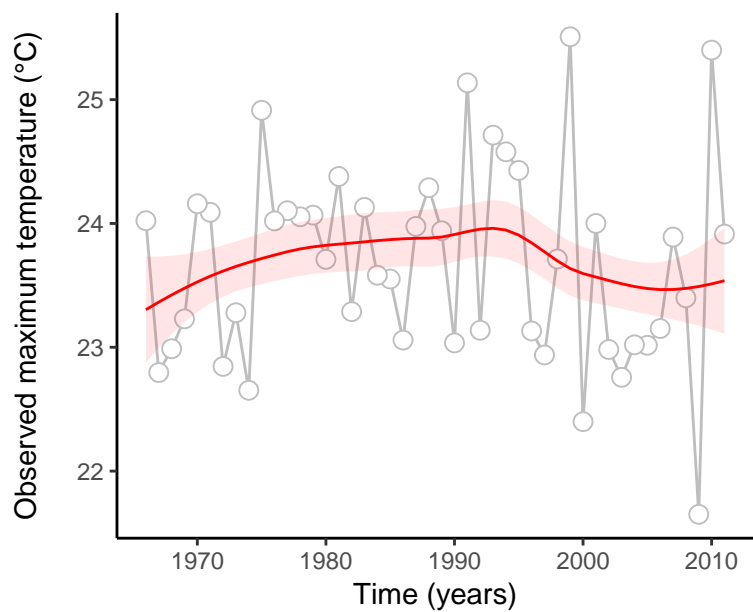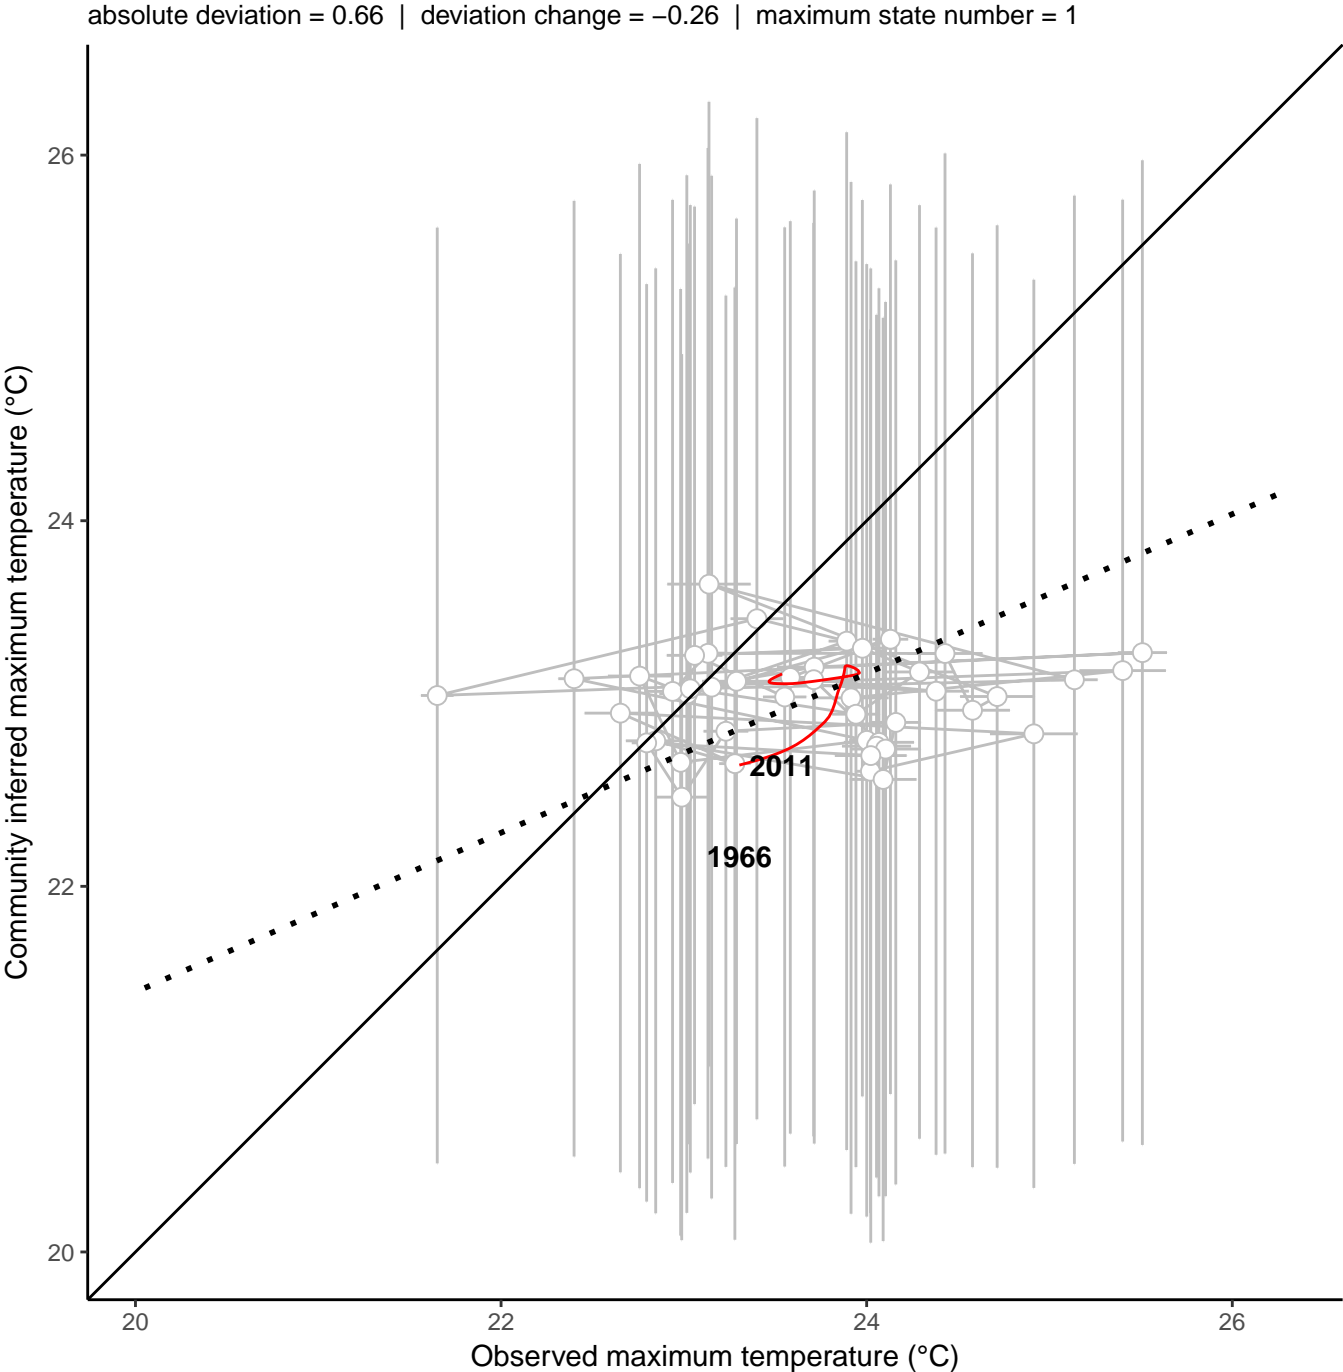

site : 840\_83\_32

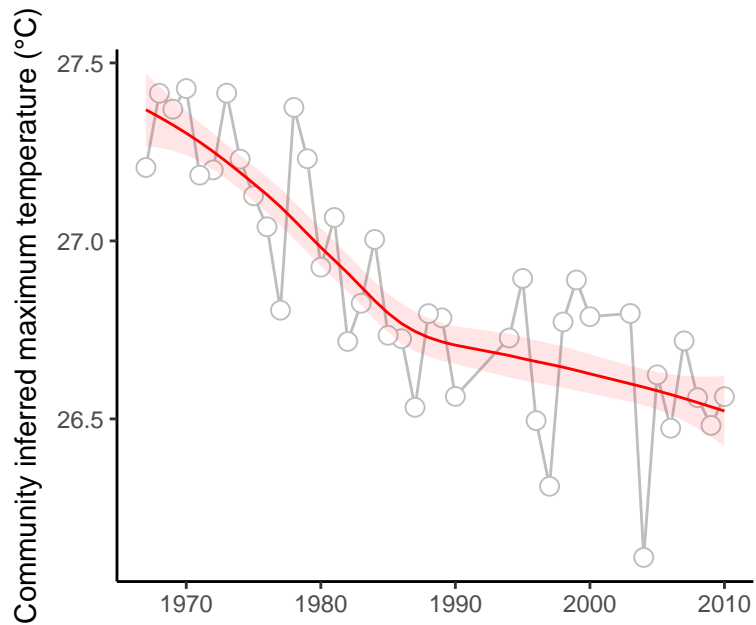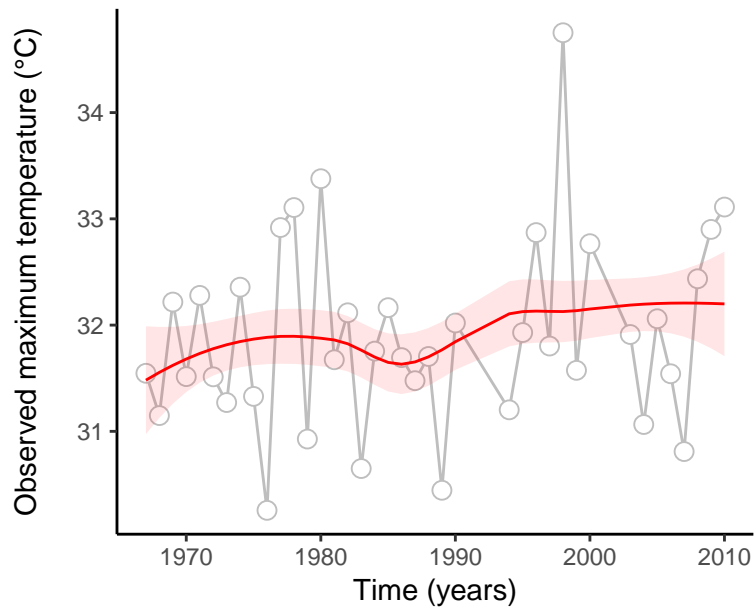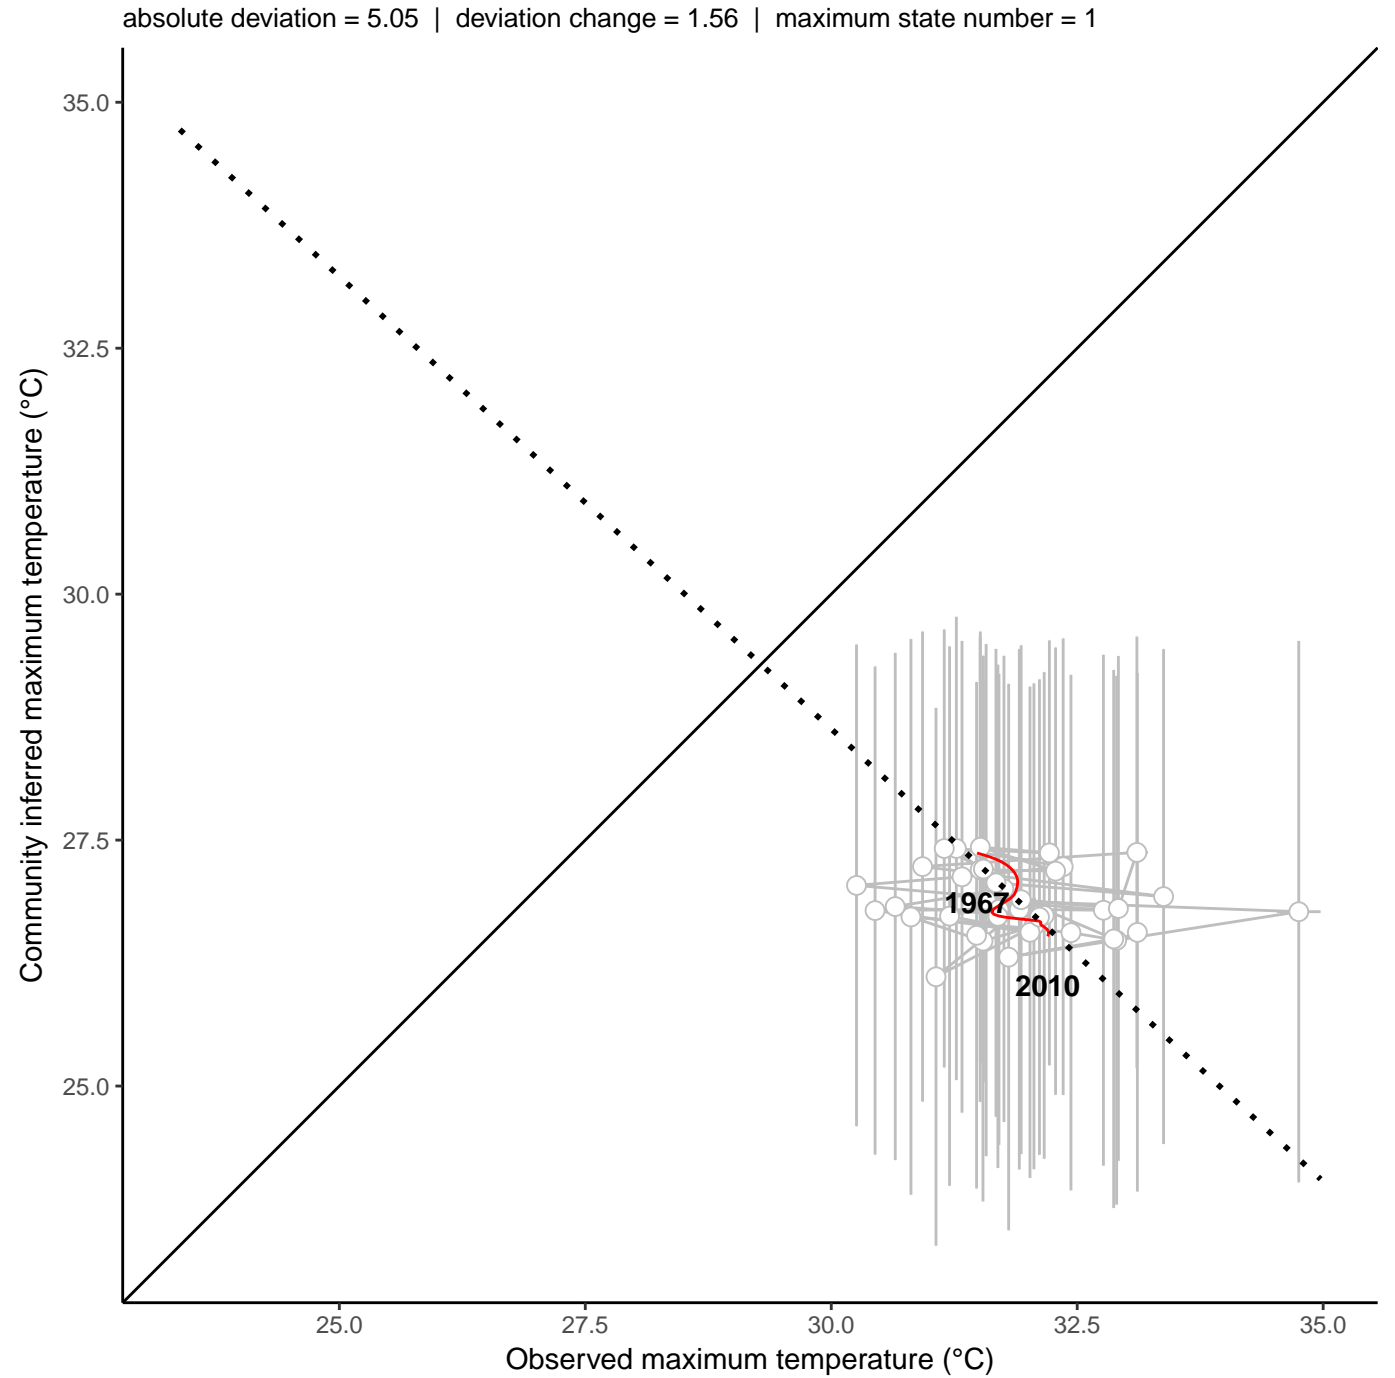

site : 840\_69\_9

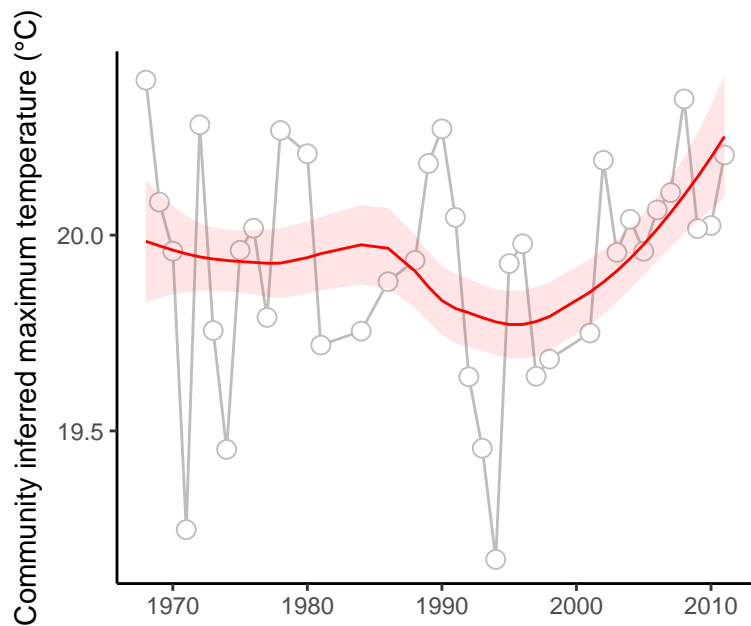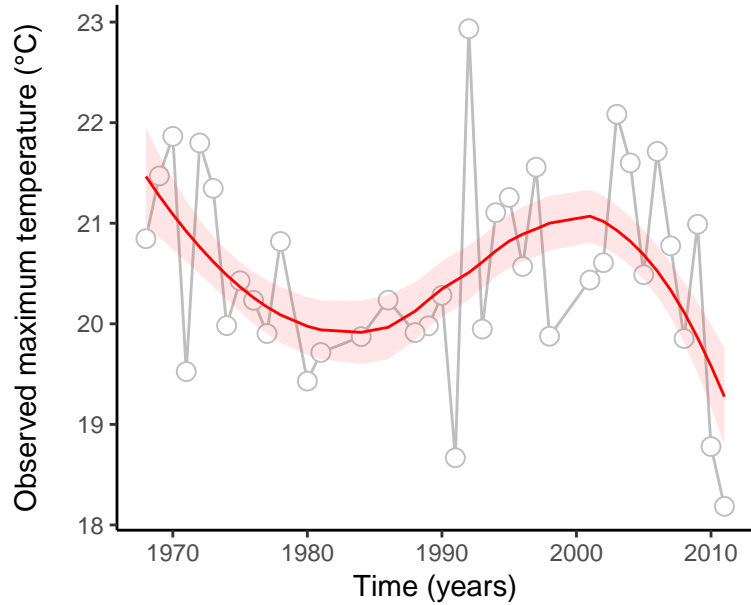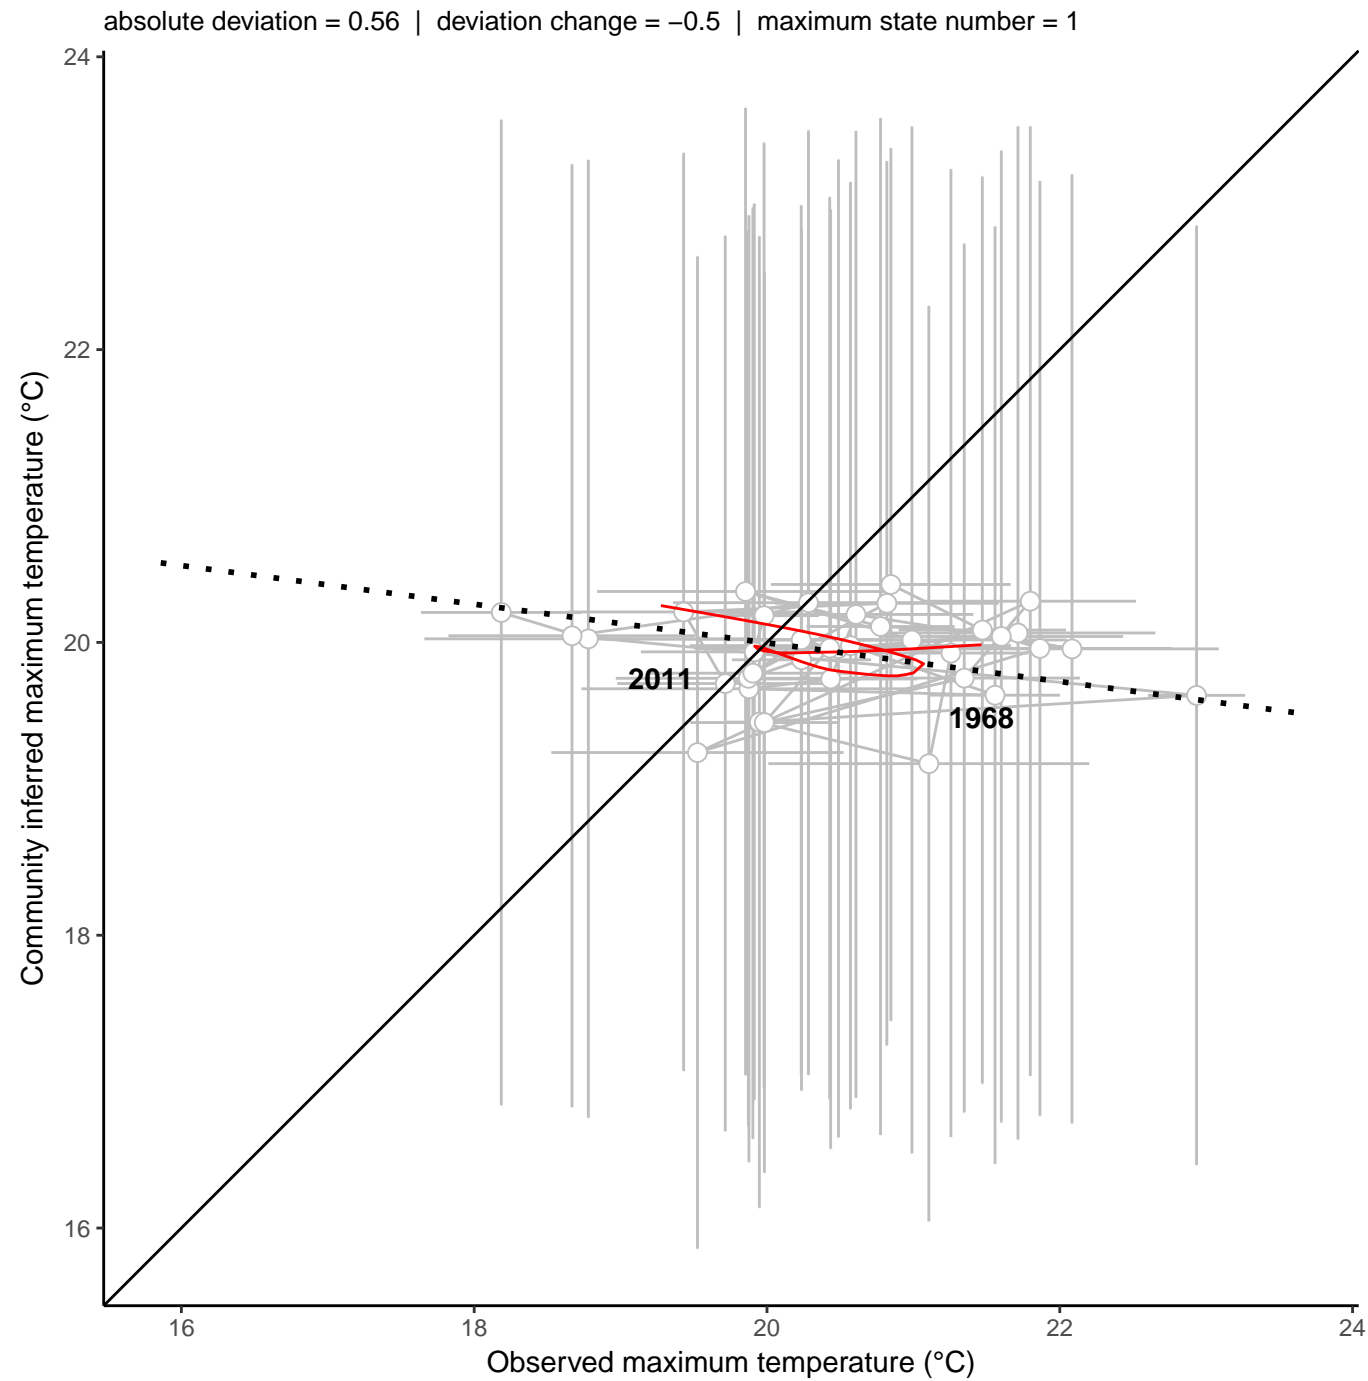



site : 840\_2\_4

absolute deviation = 4.37 | deviation change = 1.07 | maximum state number = 1

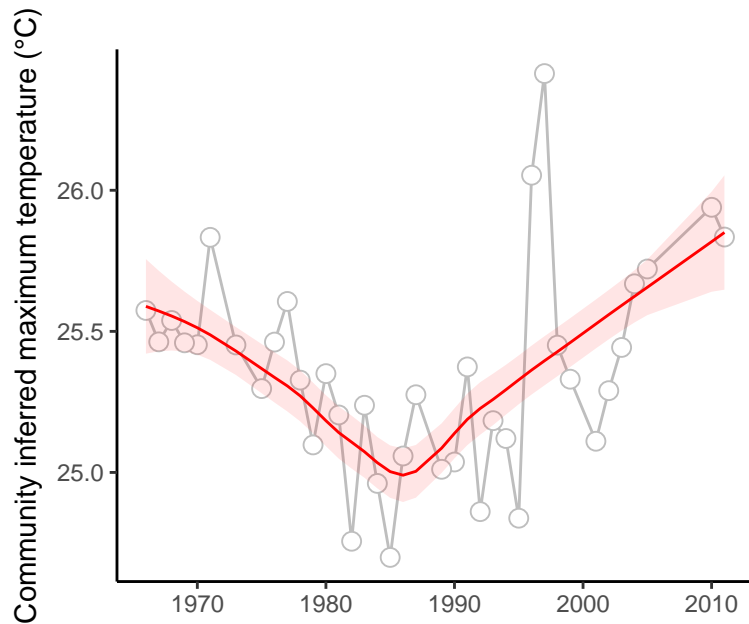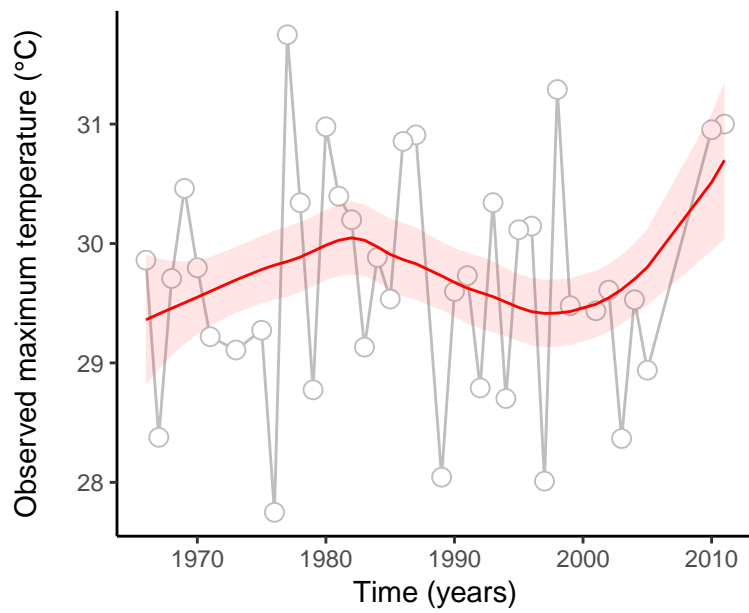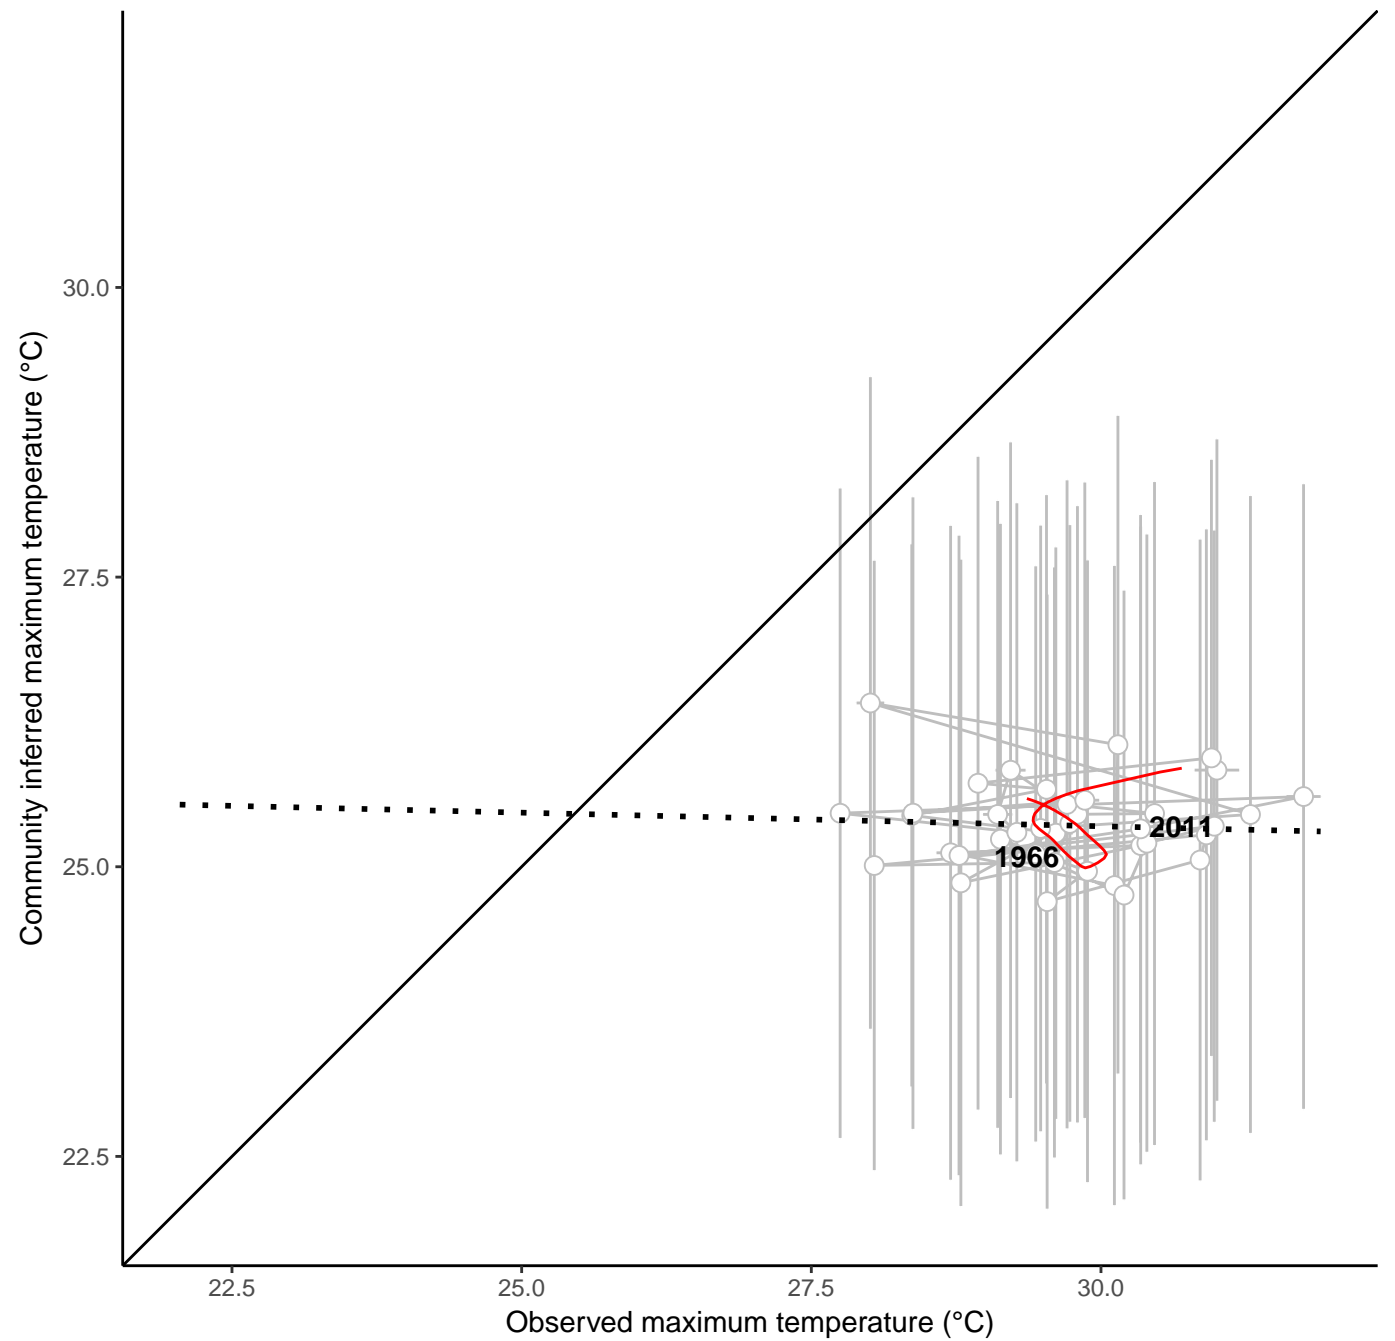

site : 840\_53\_44

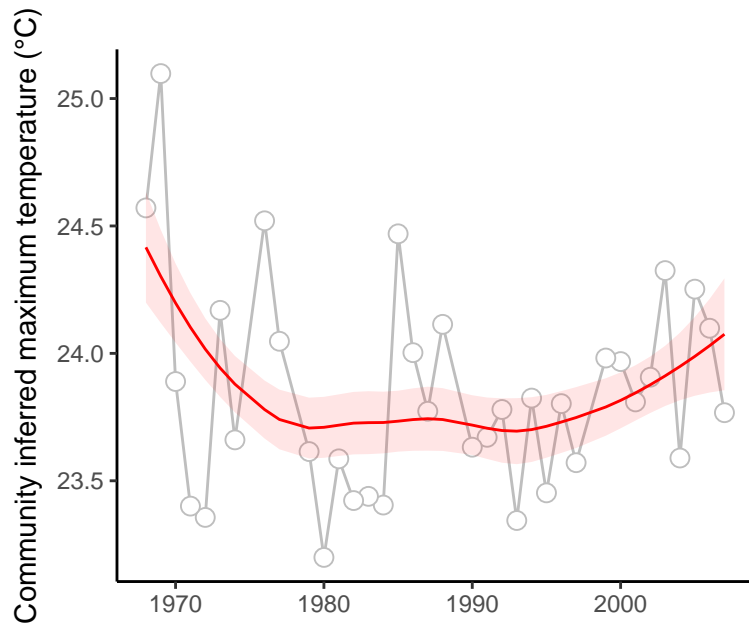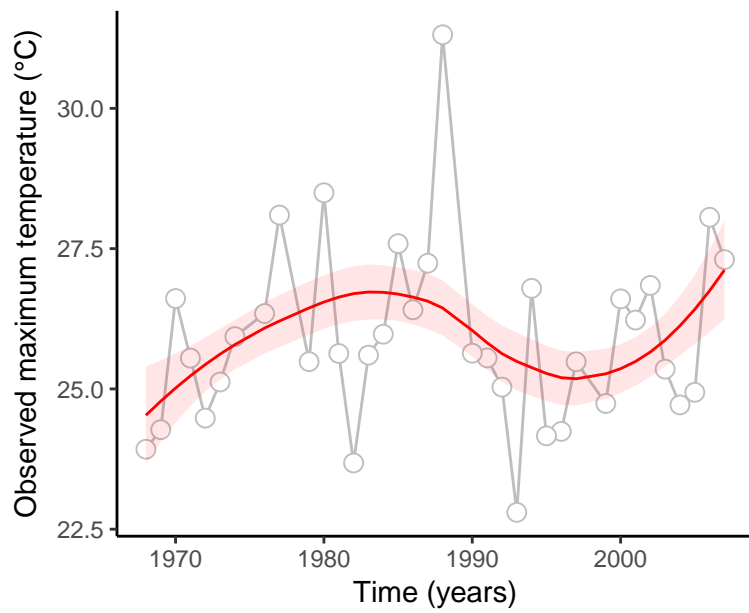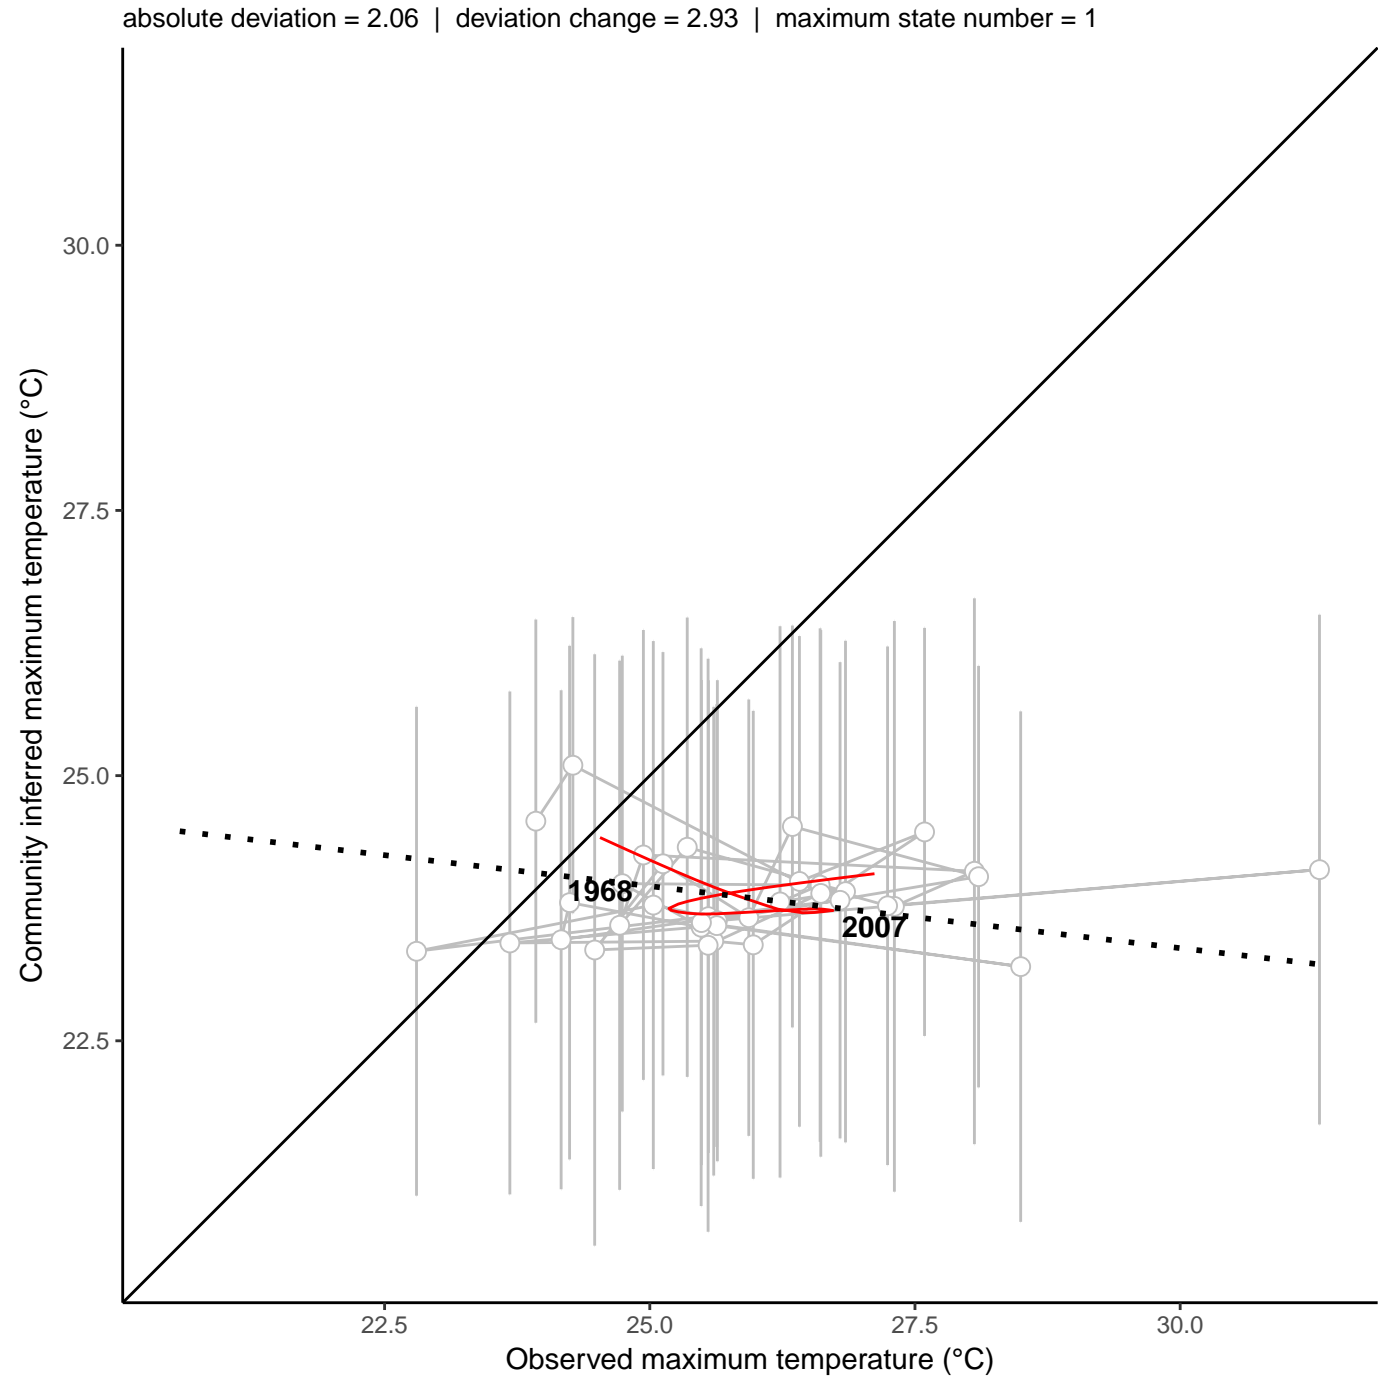

site : 840\_63\_2

absolute deviation = 2.51 | deviation change = 0.48 | maximum state number = 1

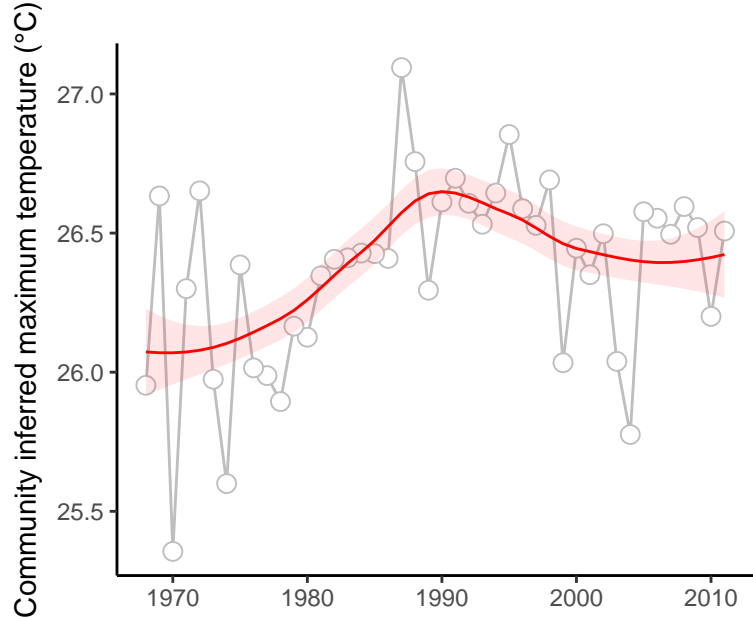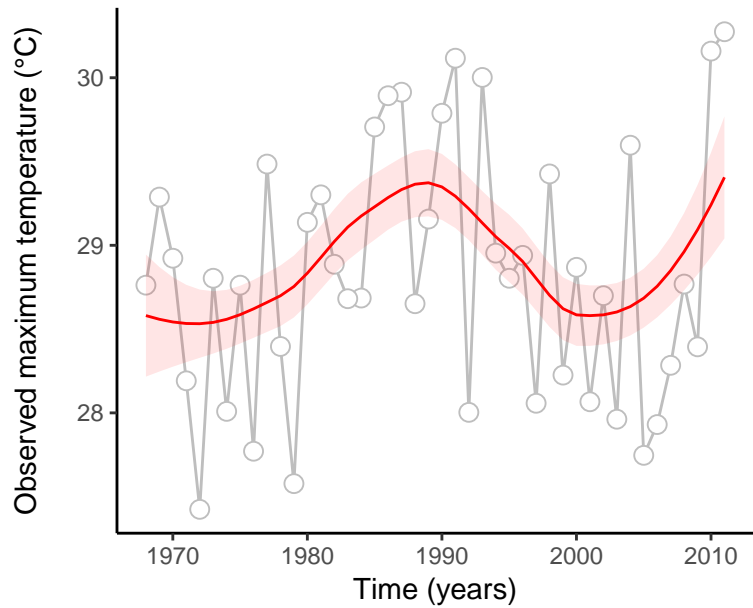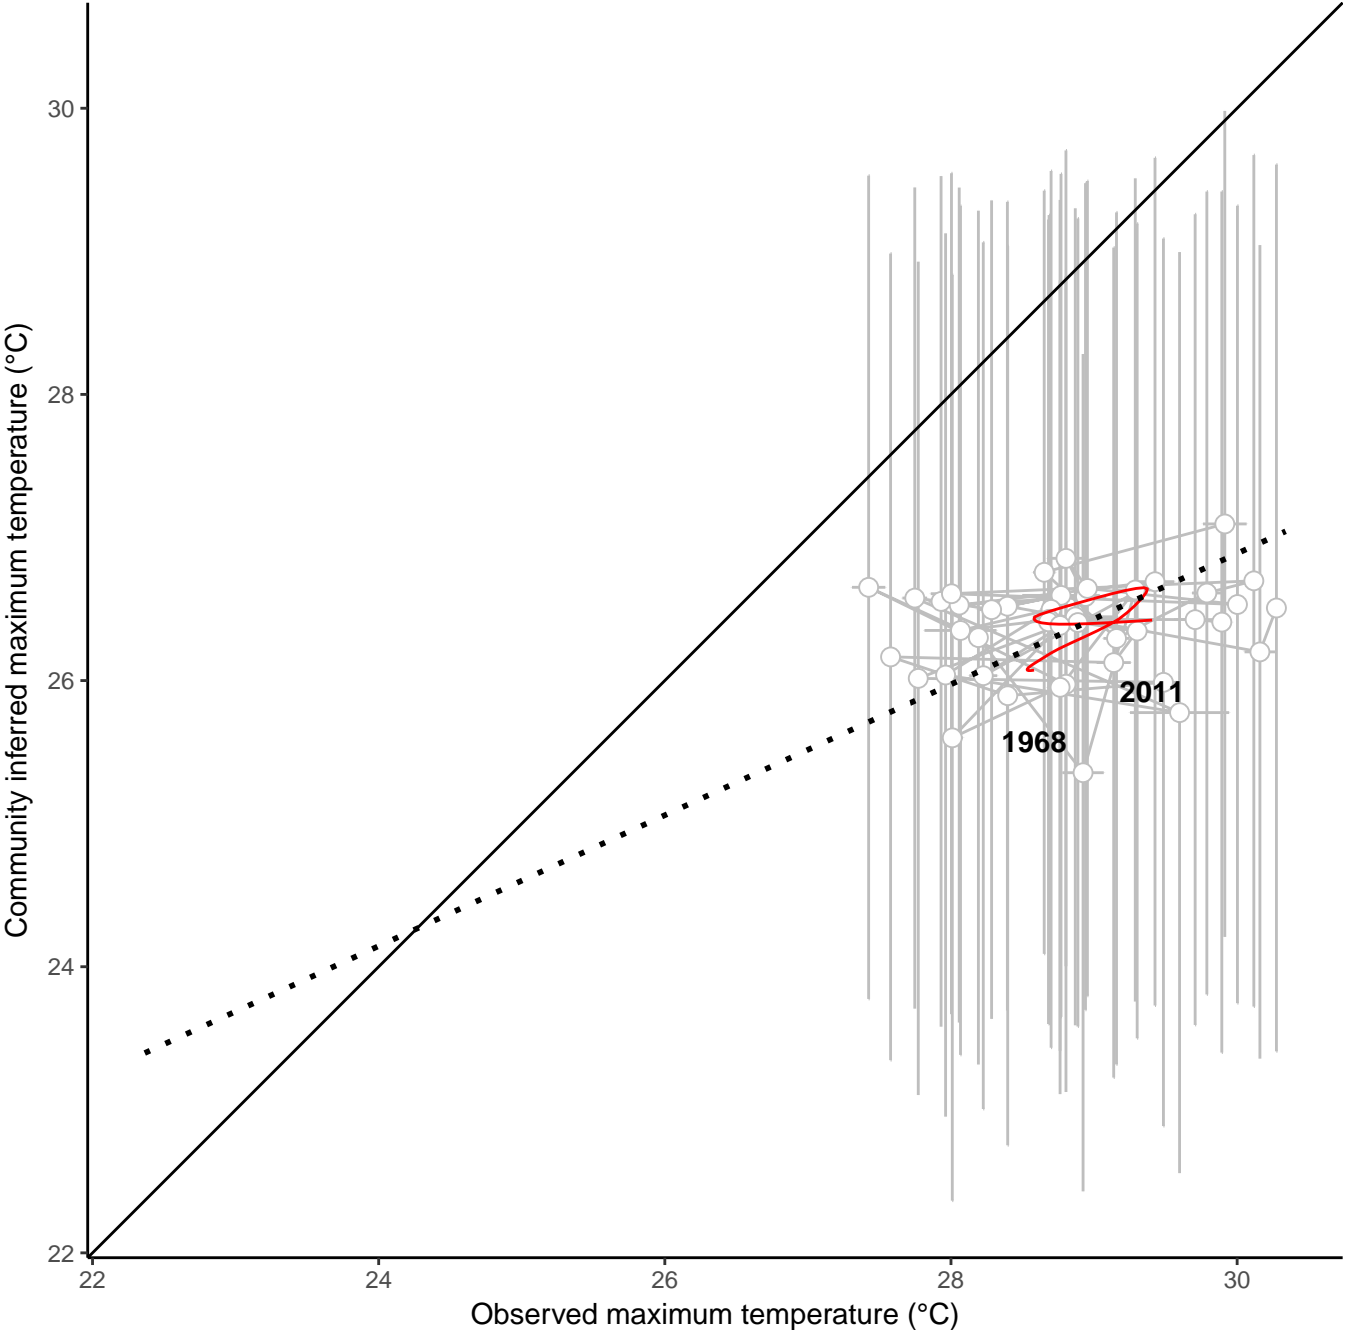

site : 840\_88\_25

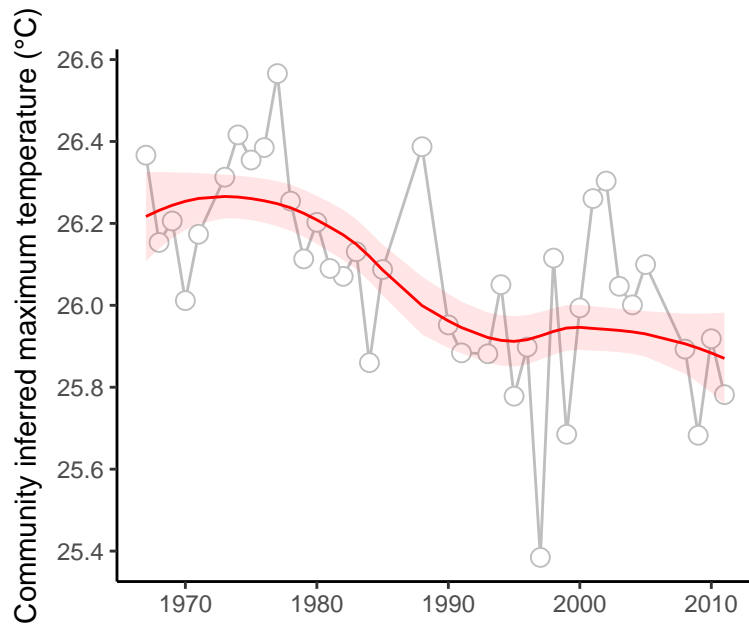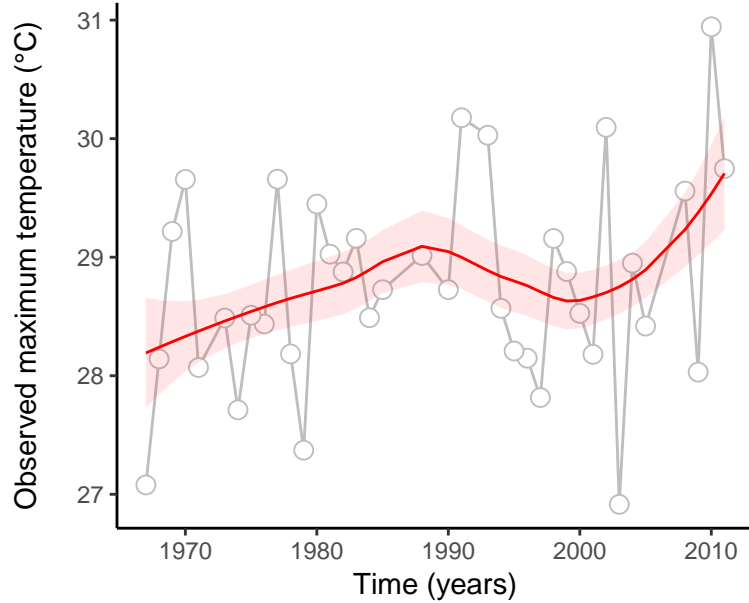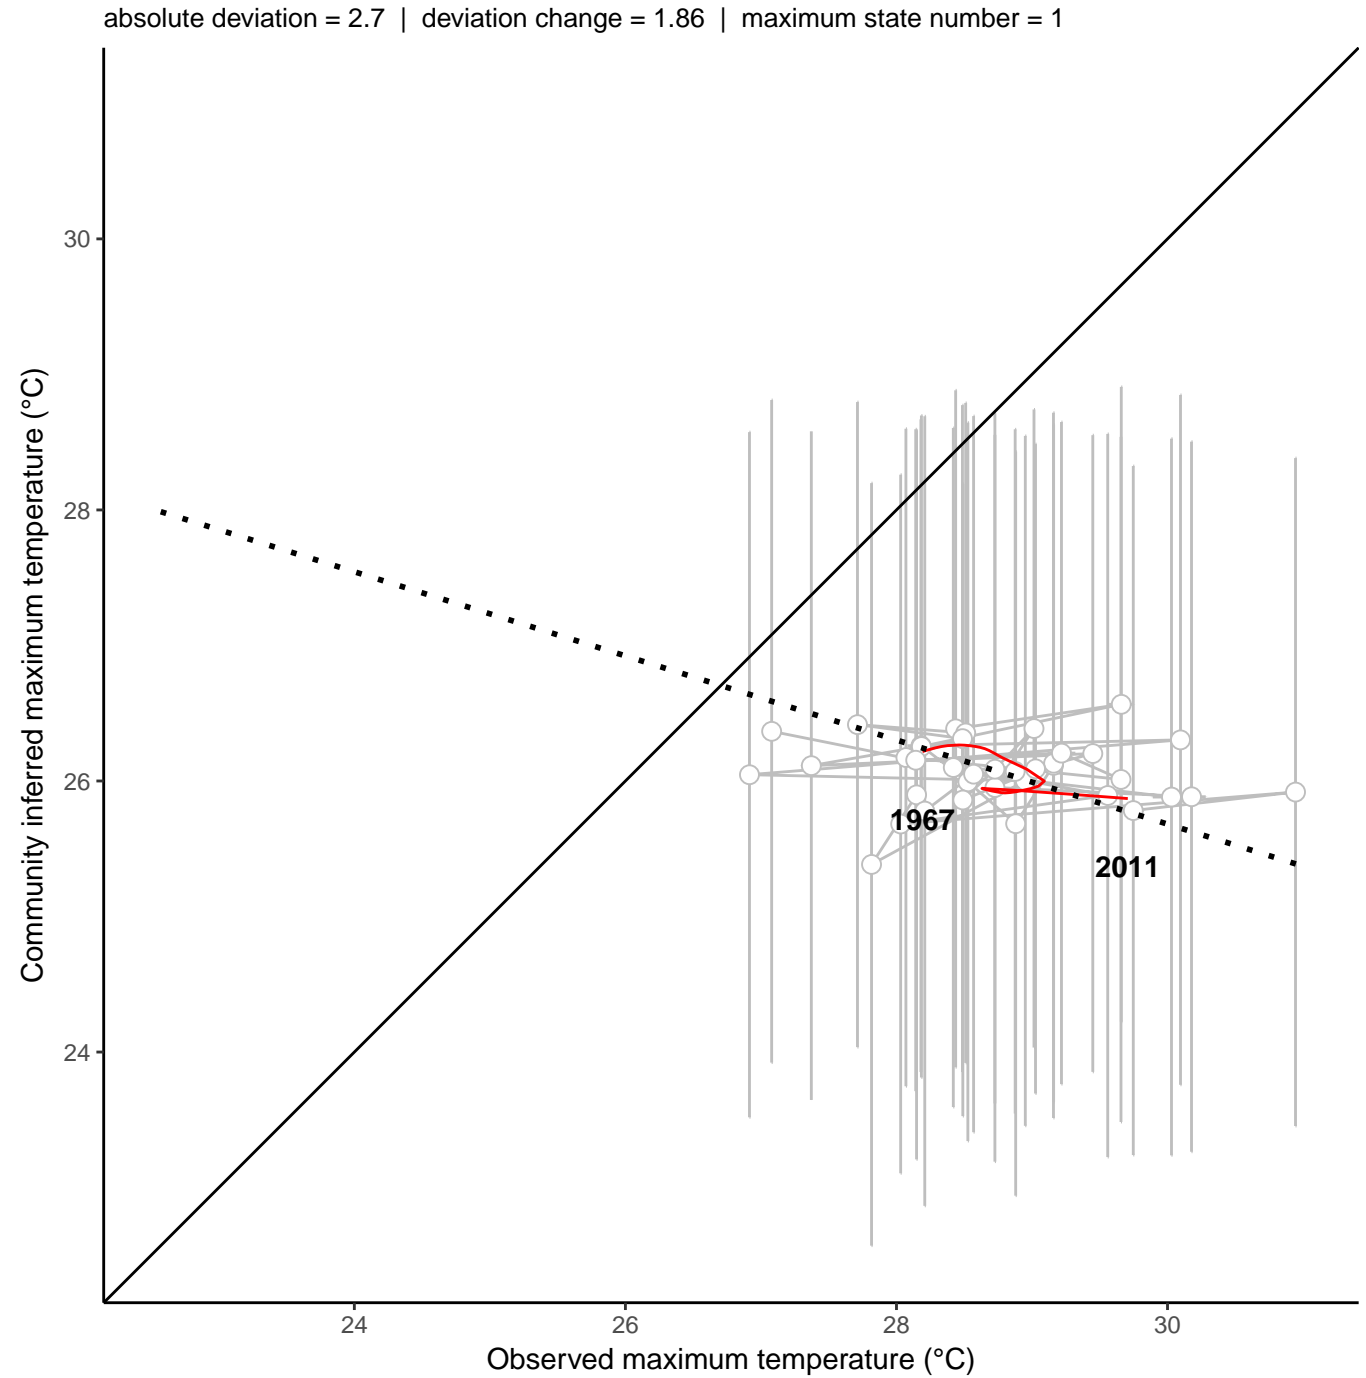

site : 840\_88\_30

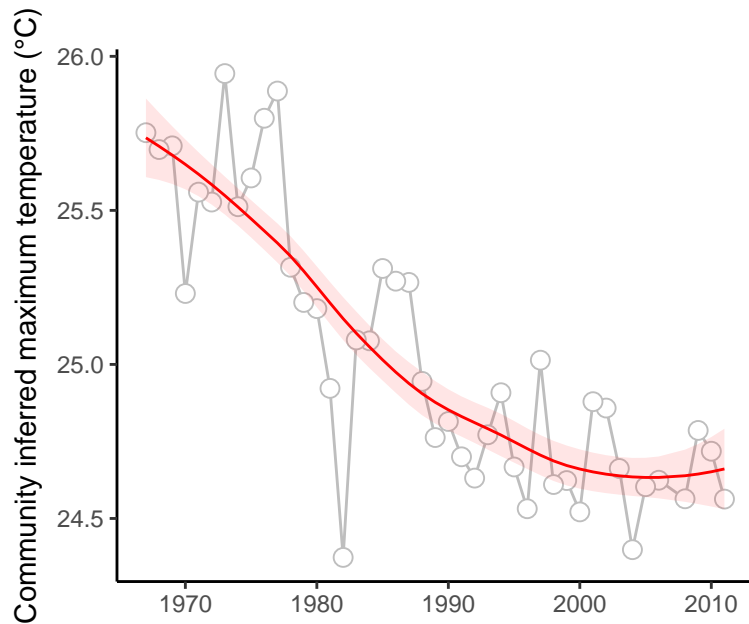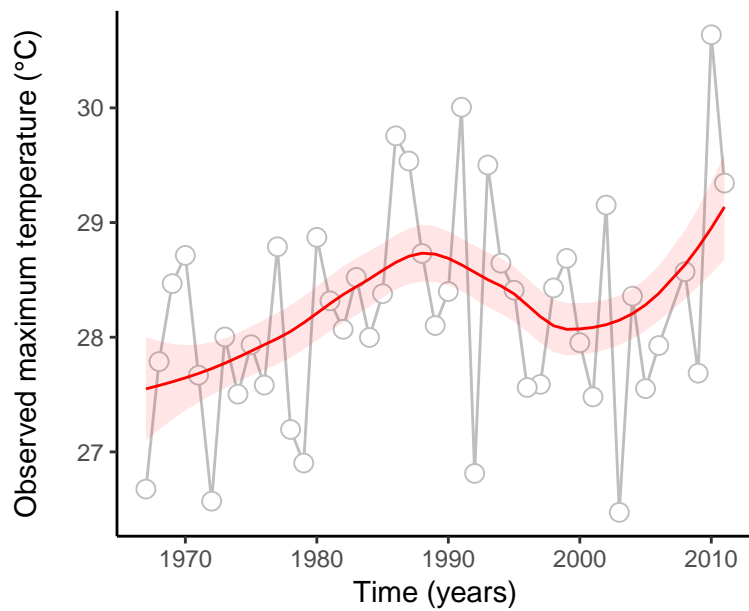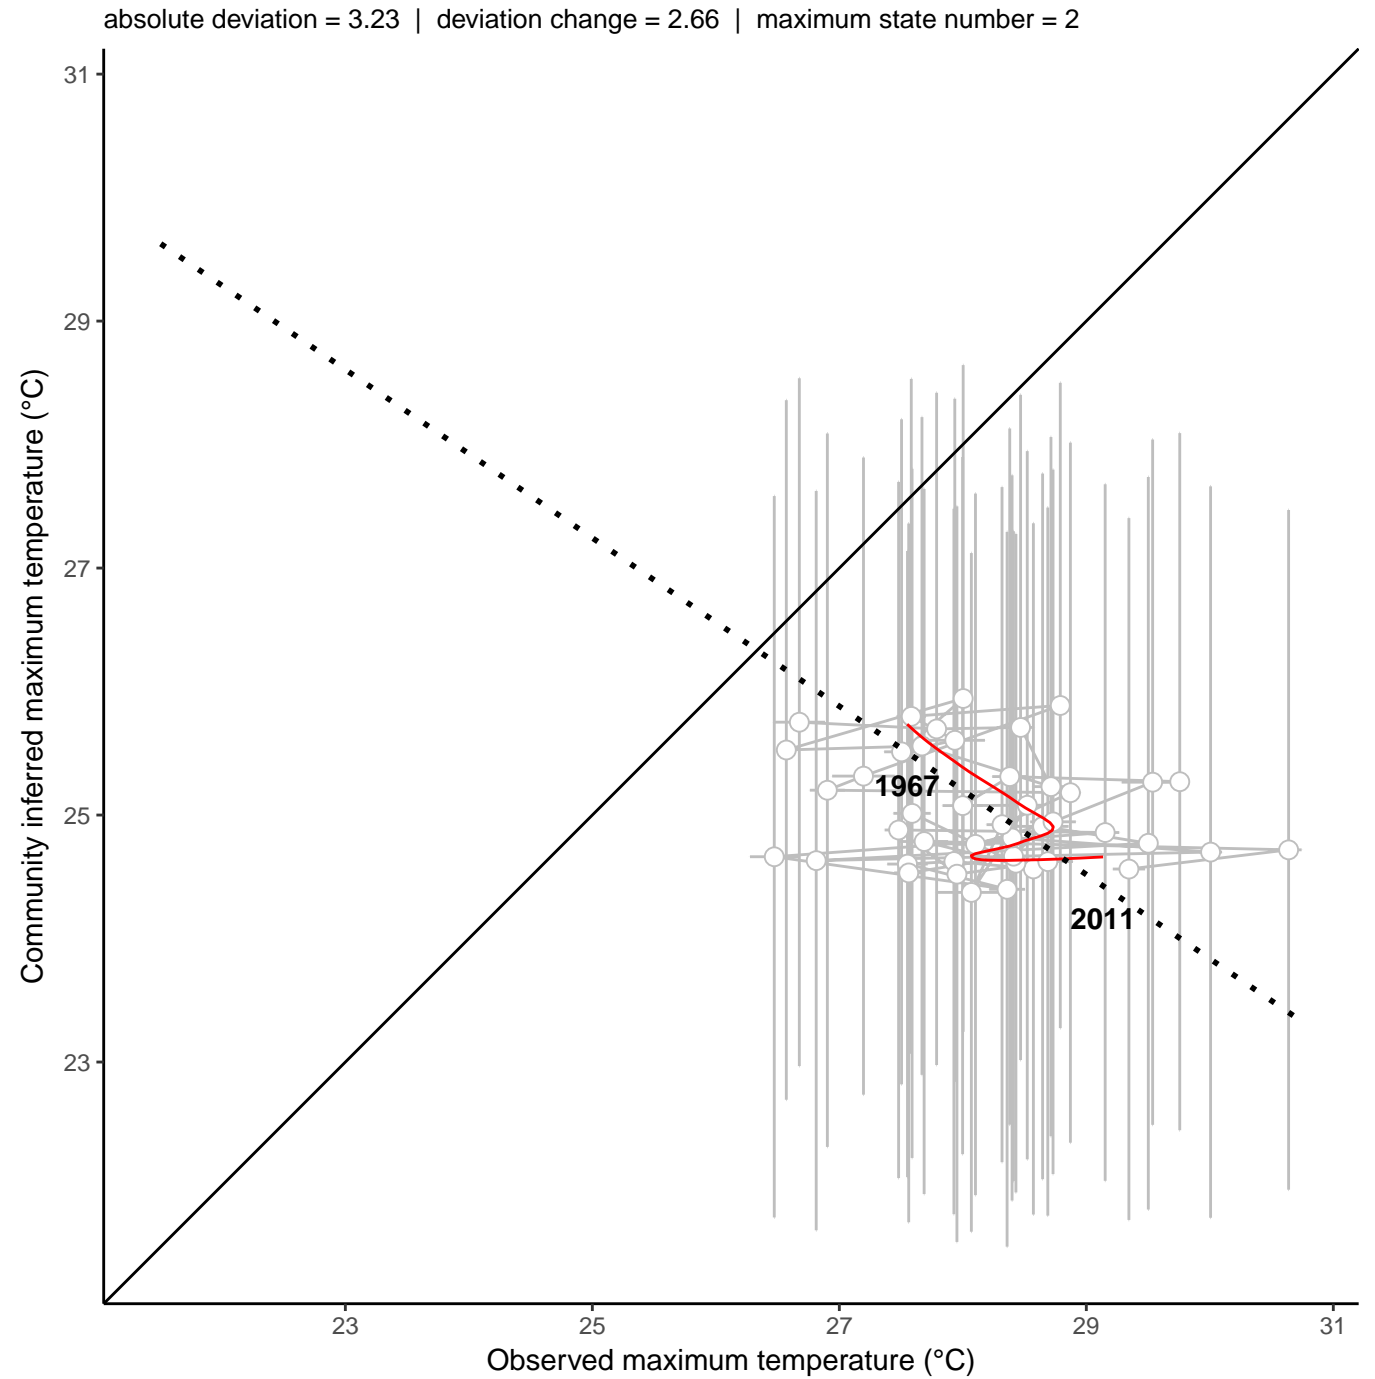

site : 840\_50\_38

absolute deviation = 1.18 | deviation change = -0.12 | maximum state number = 1

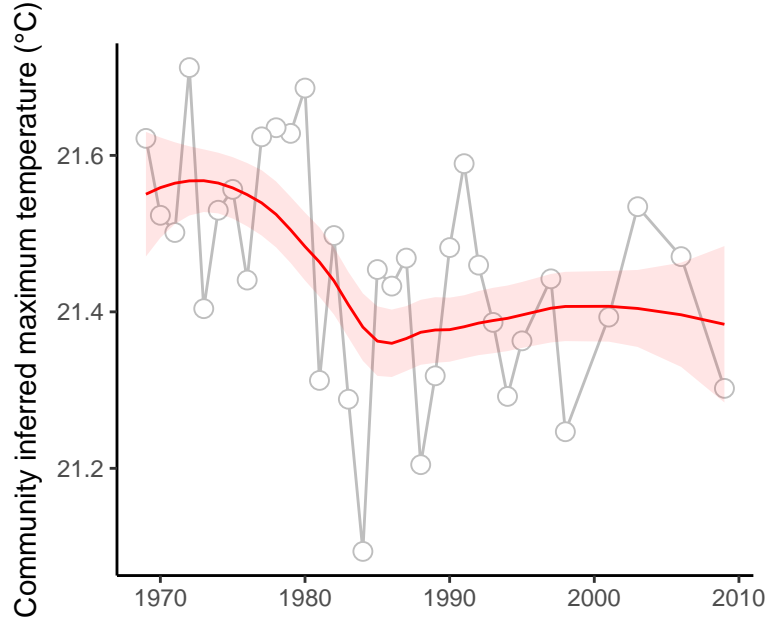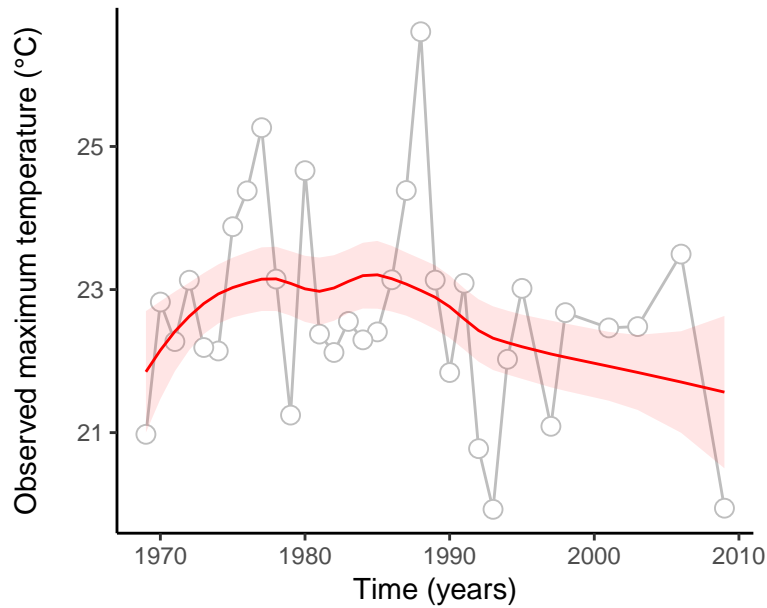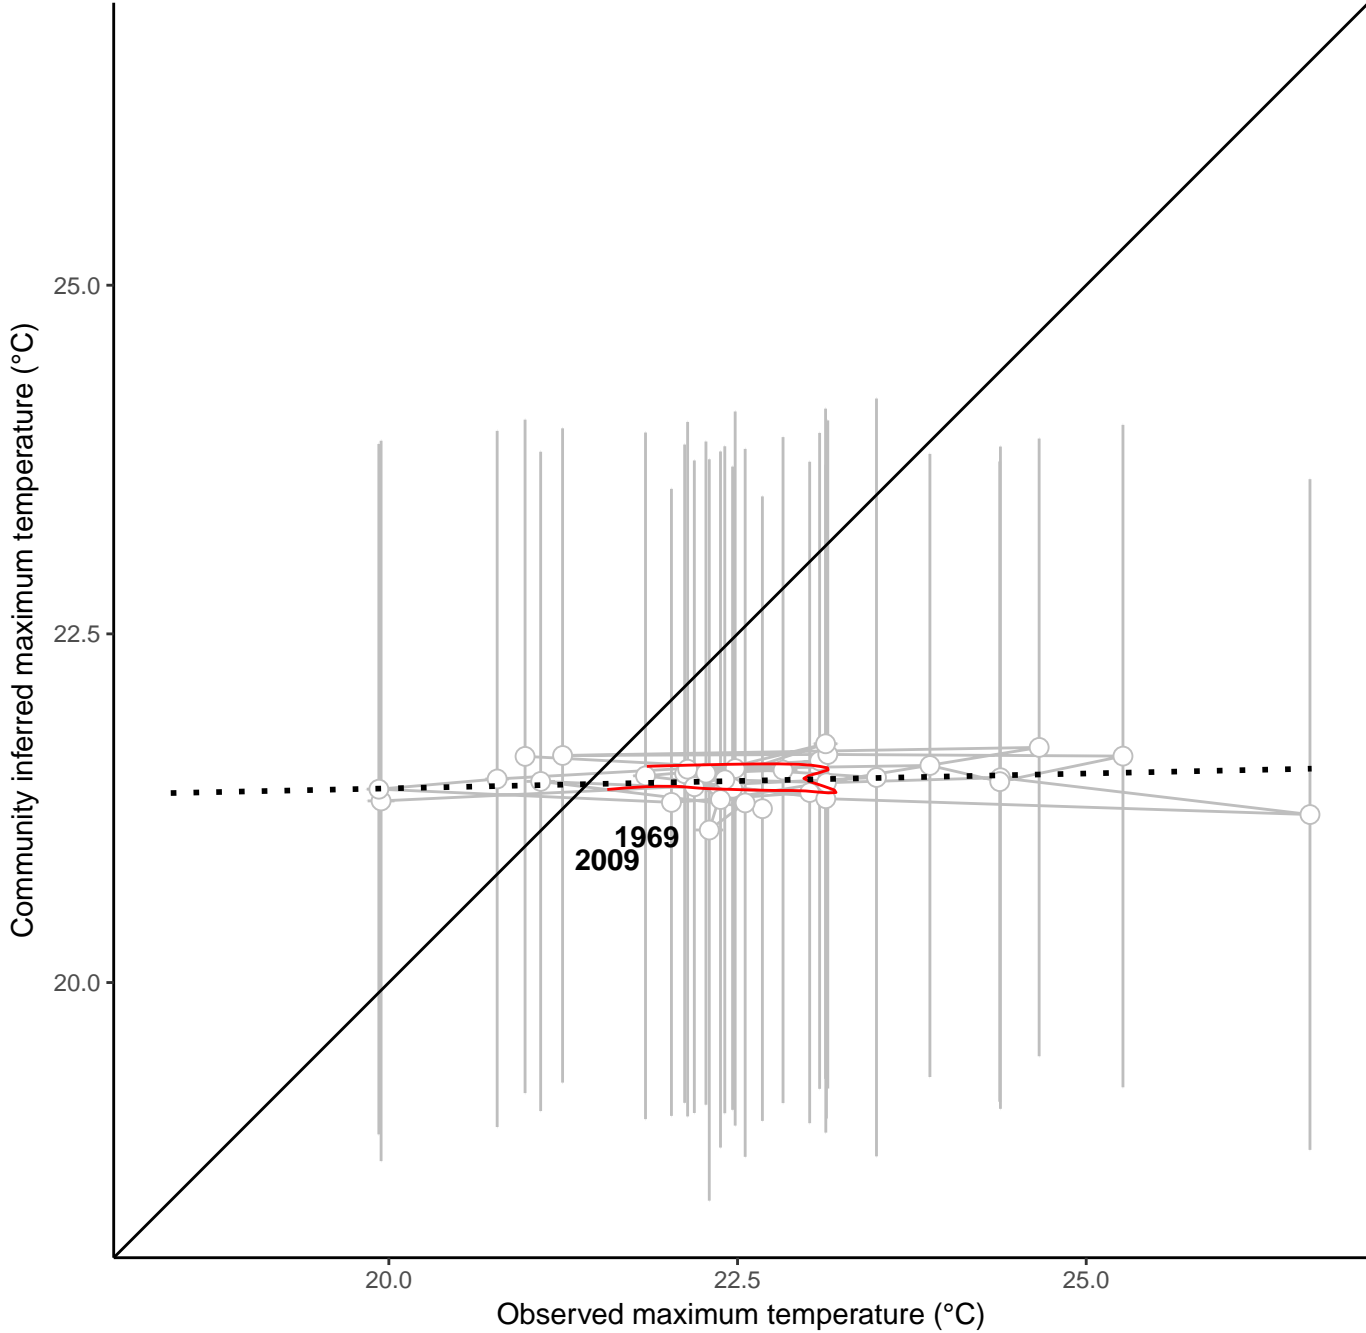

site : 840\_87\_5

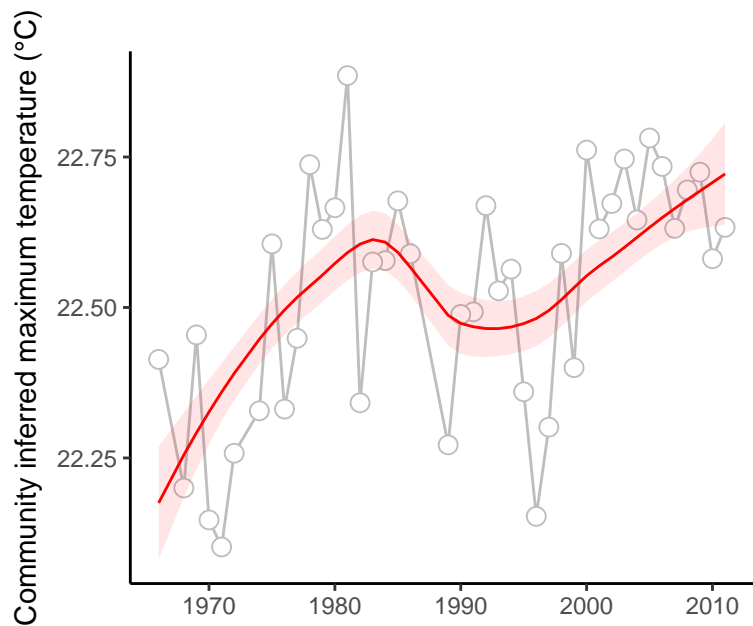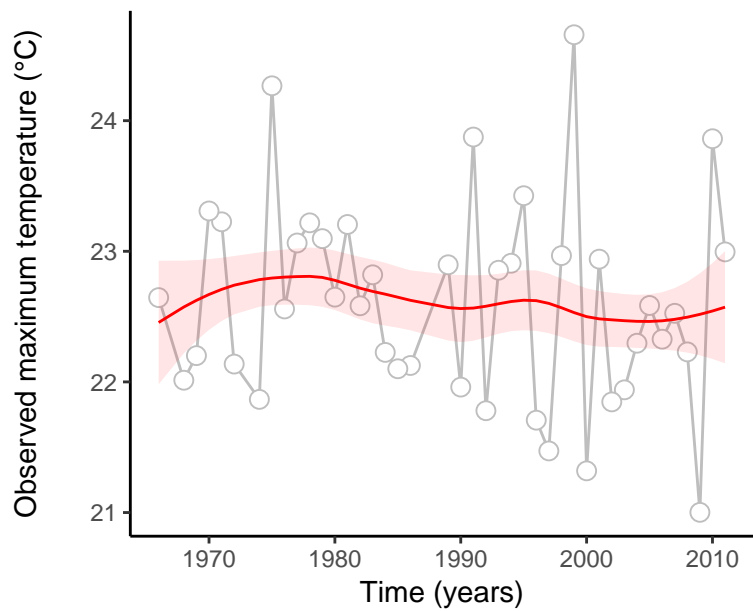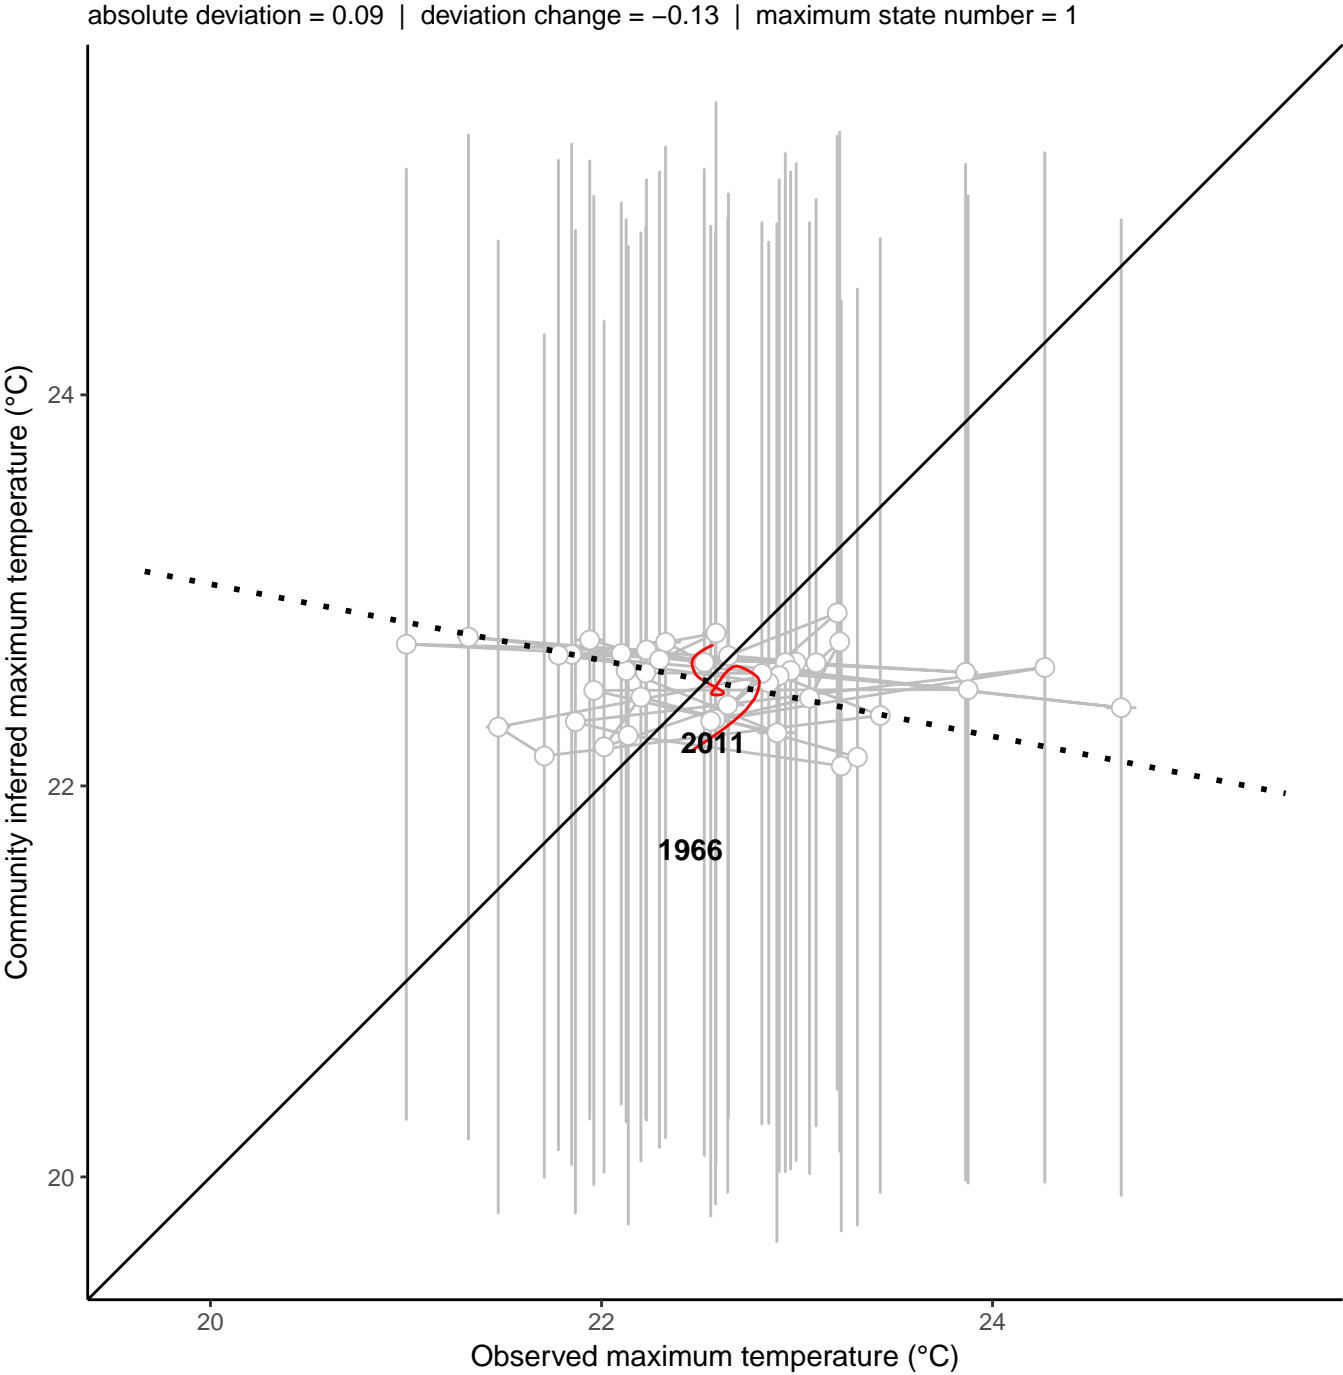

site : 840\_72\_31

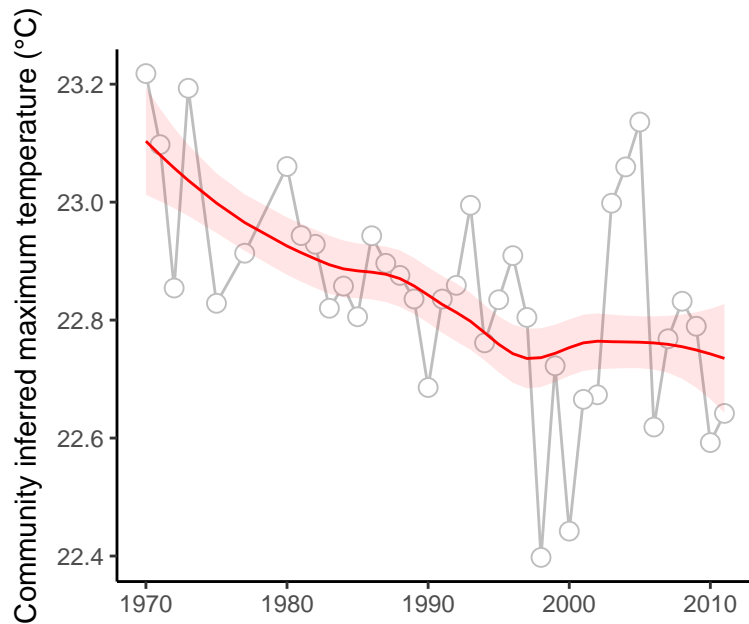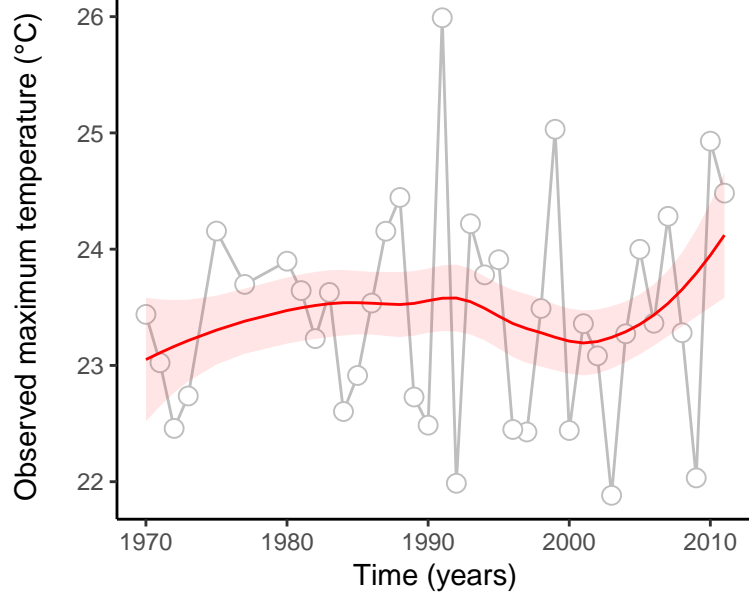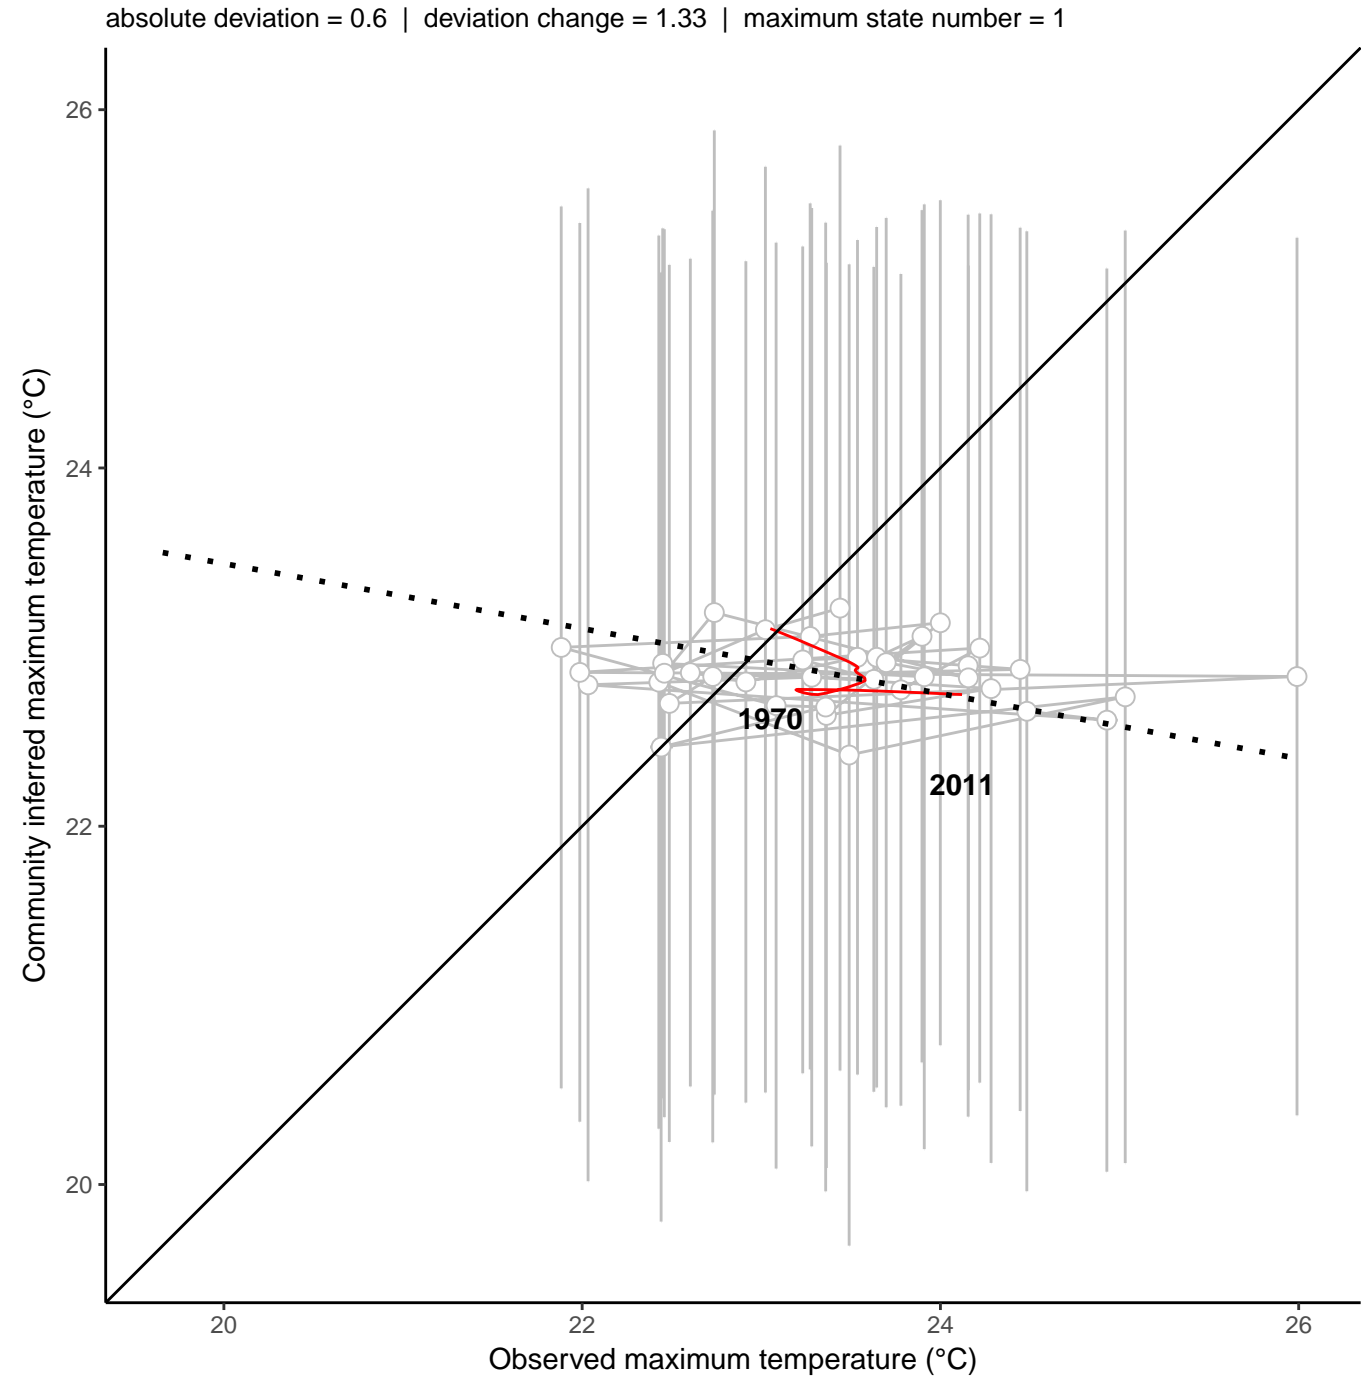



site : 840\_44\_12

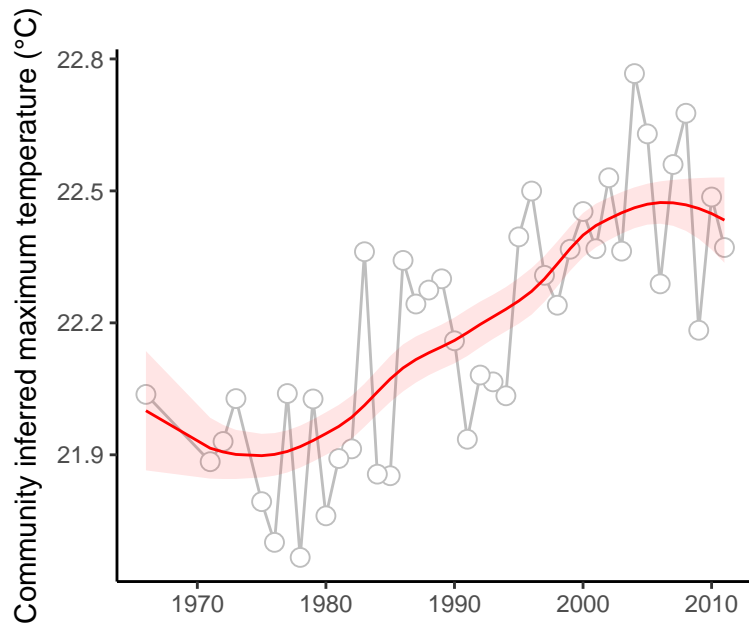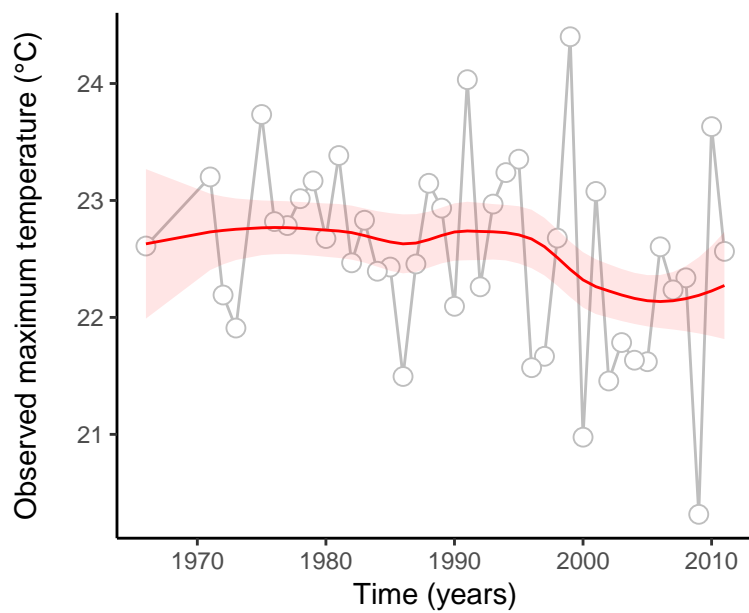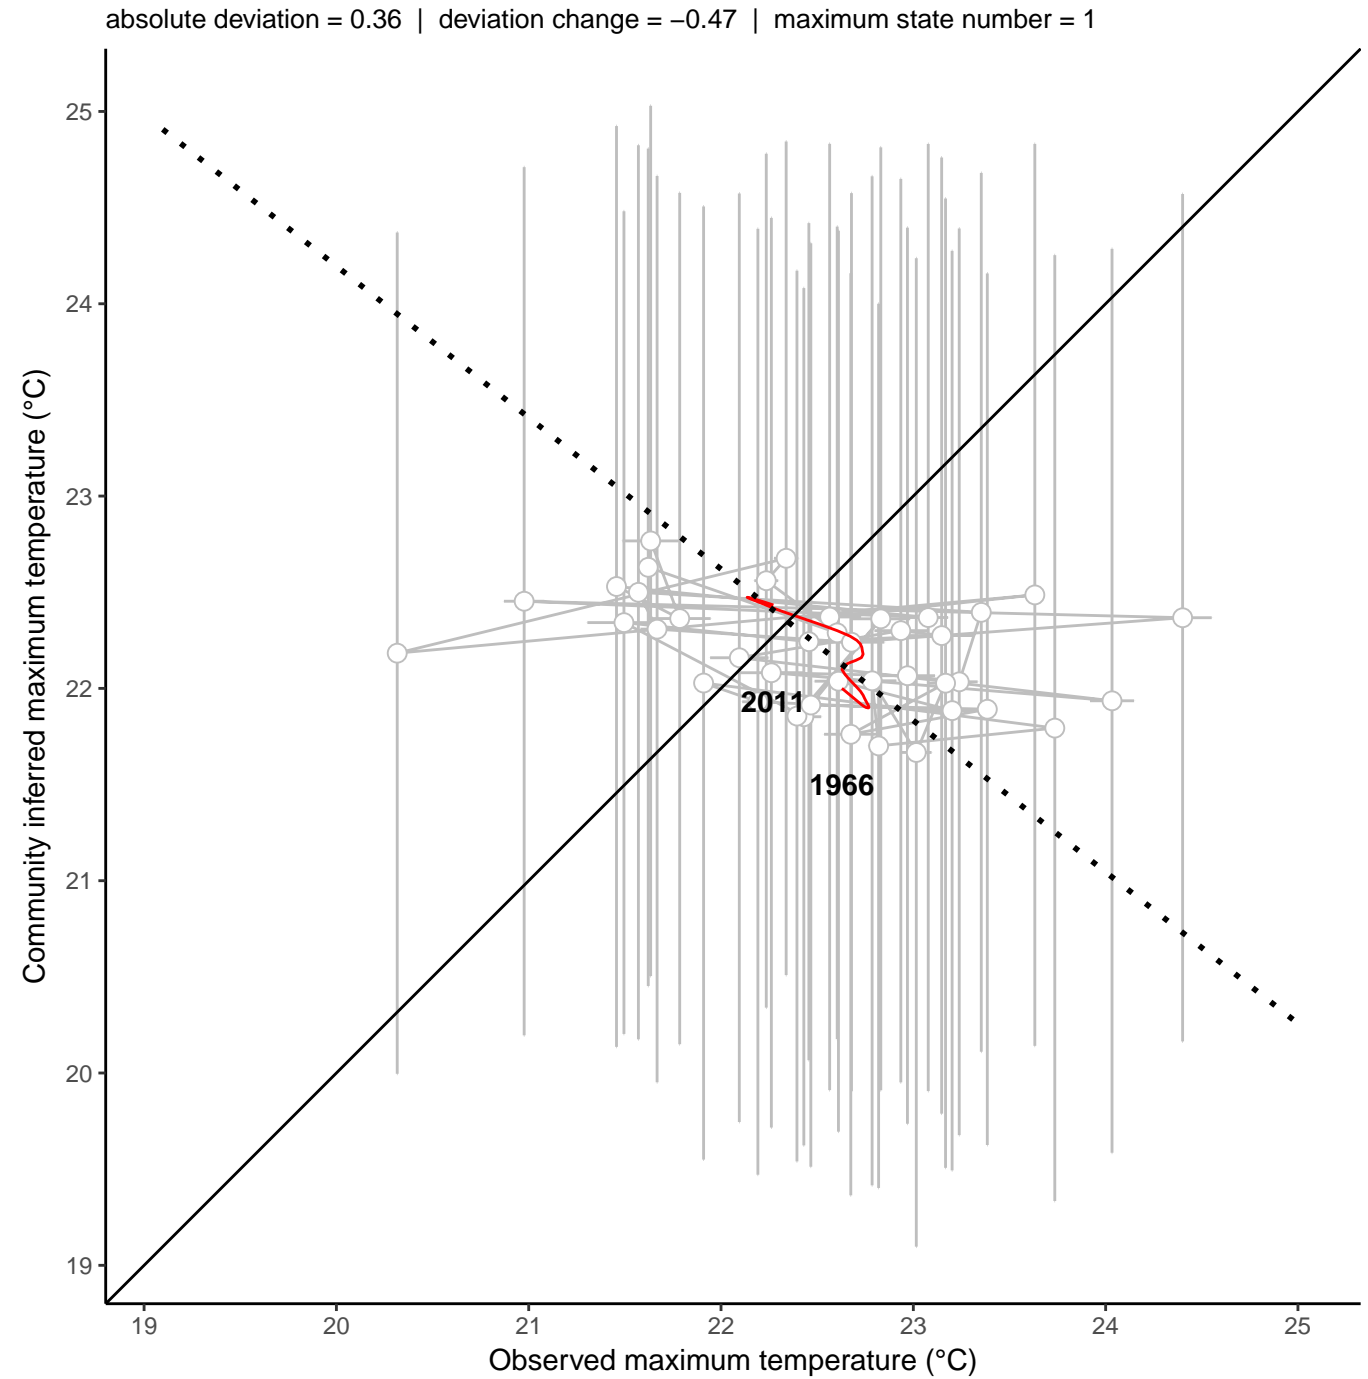

site : 840\_81\_32

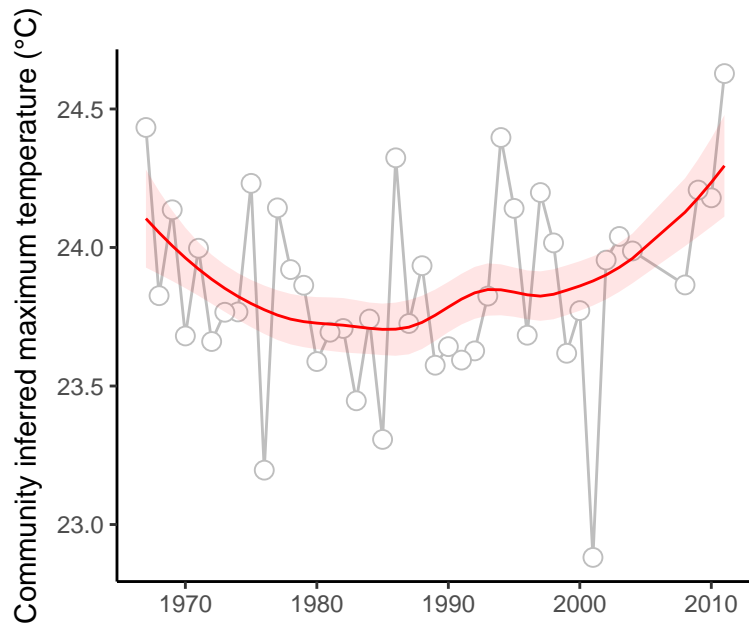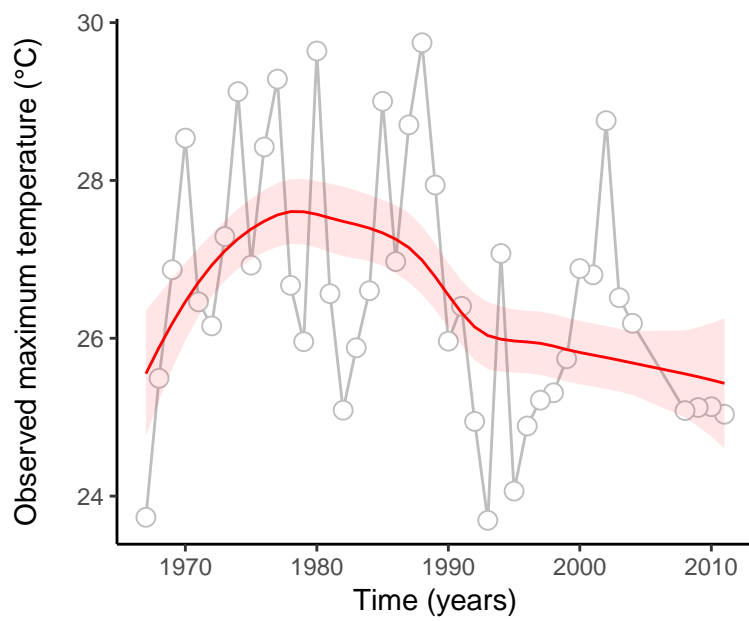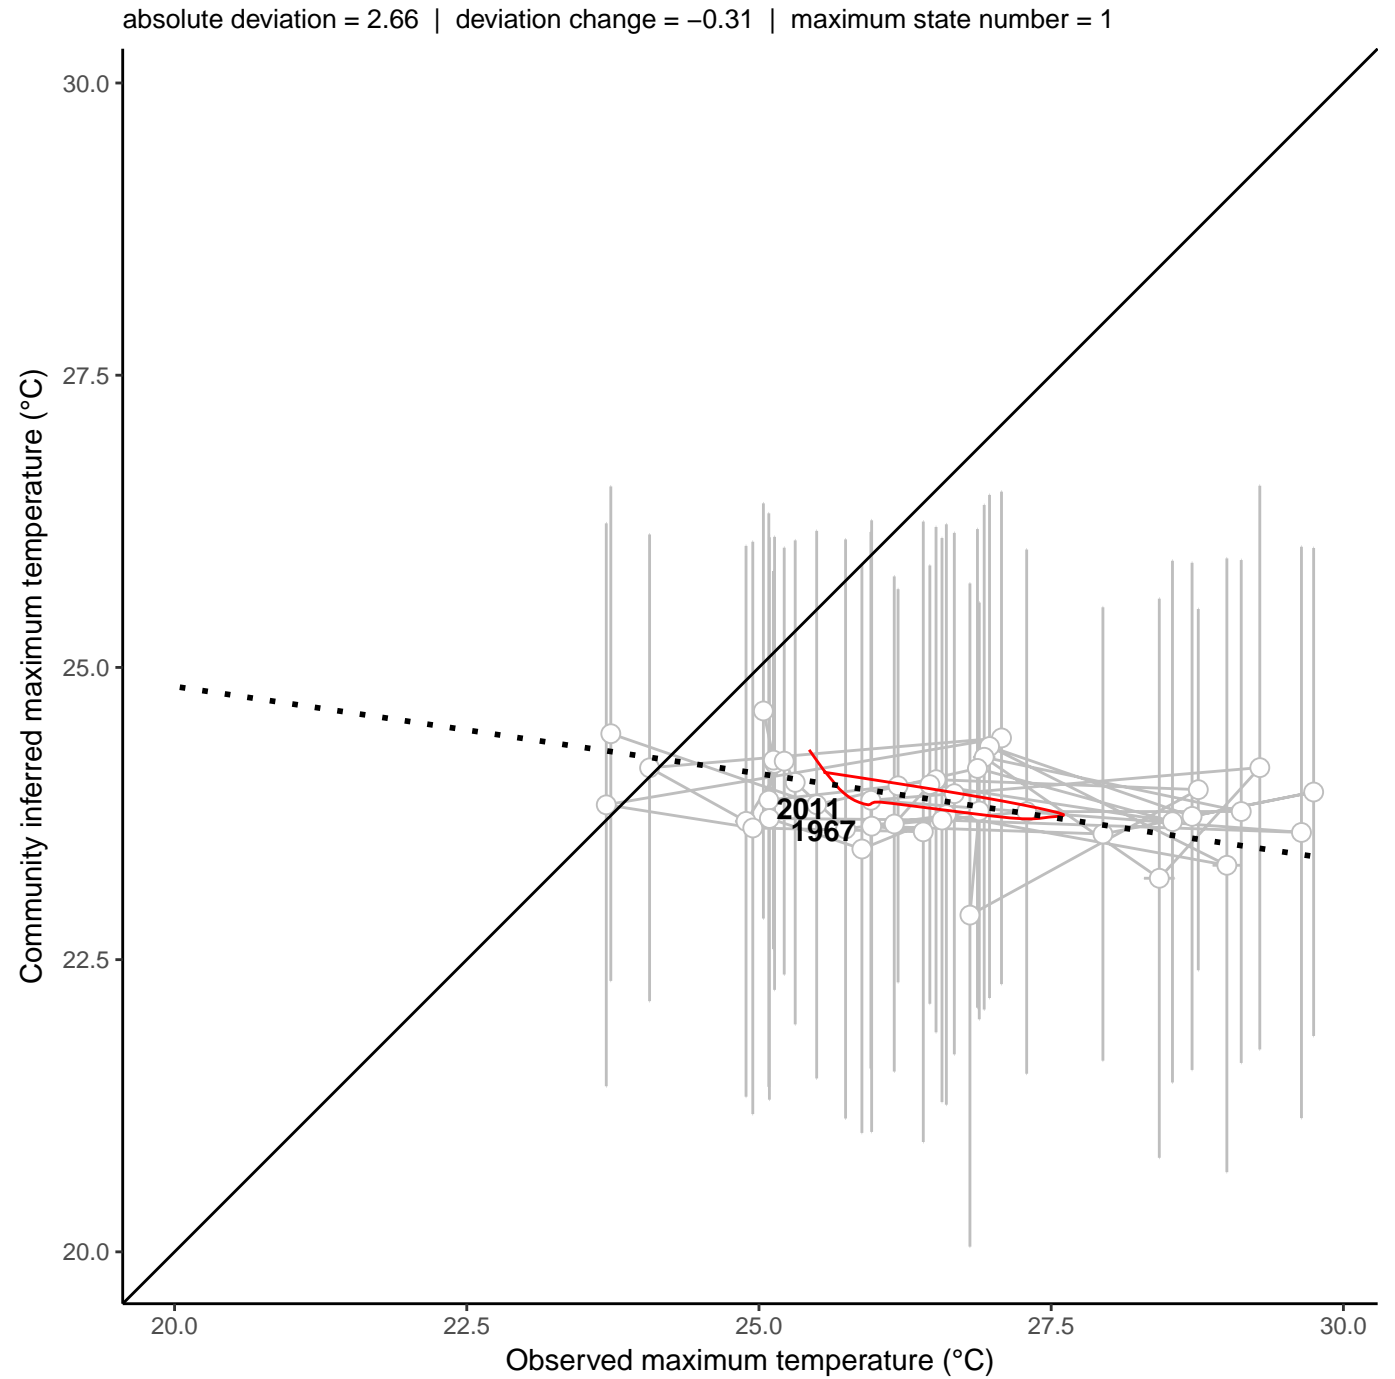

site : 840\_2\_16

absolute deviation = 4.04 | deviation change = 1.4 | maximum state number = 1

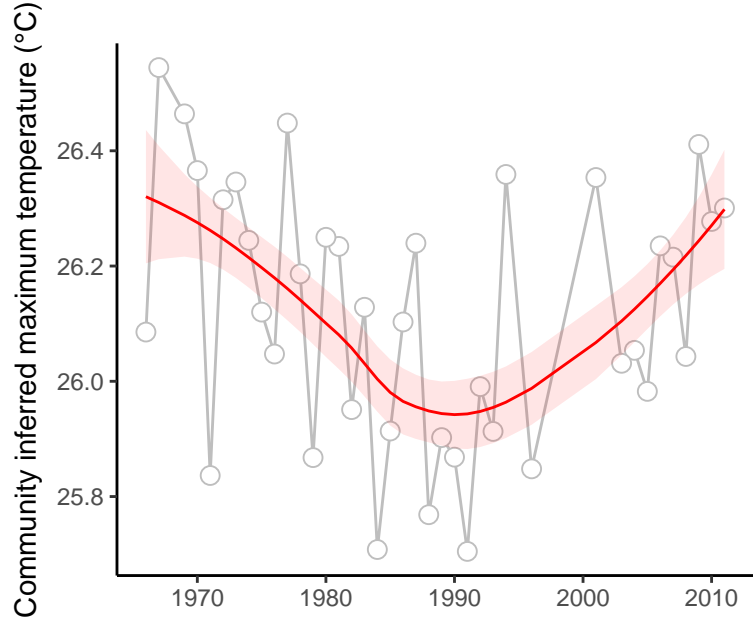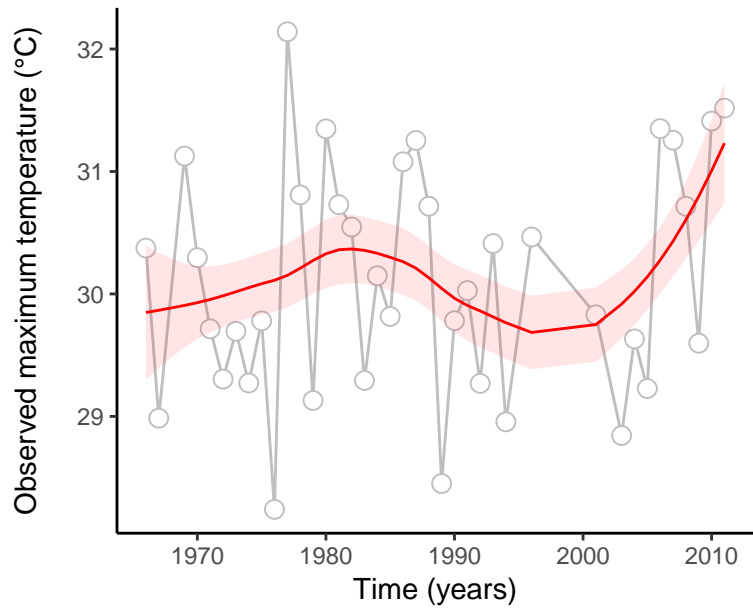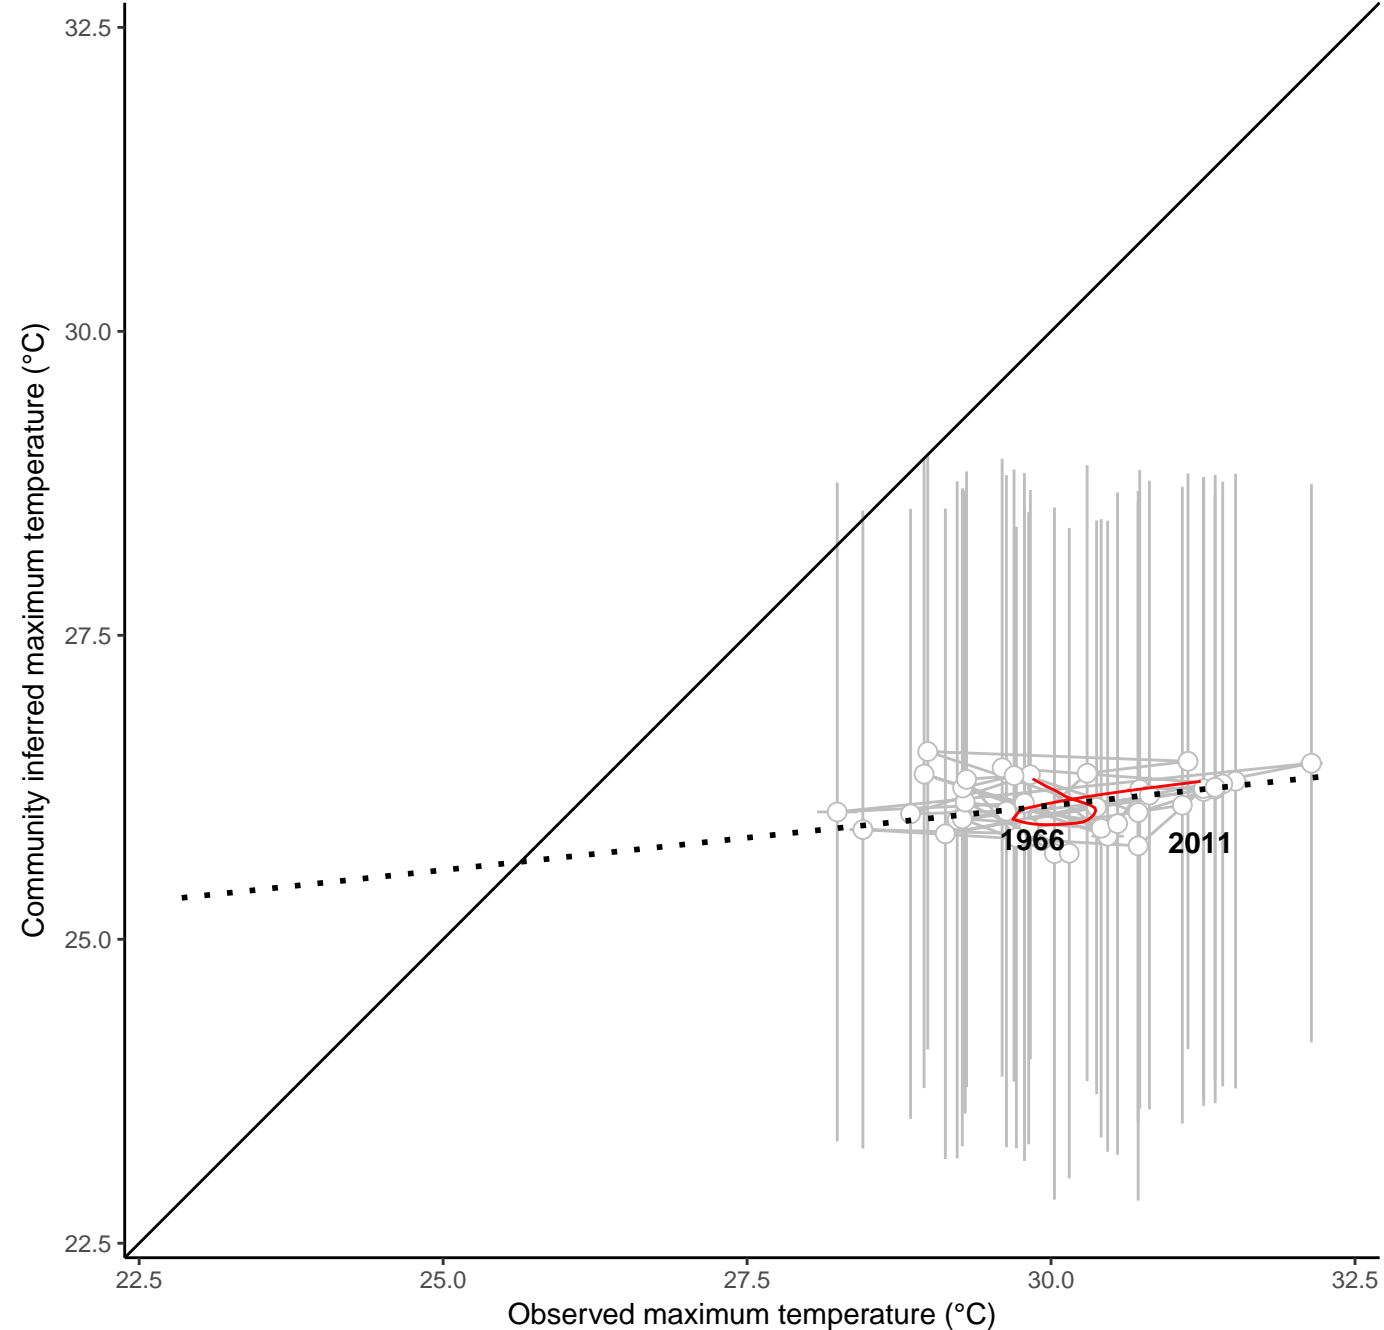

site : 840\_88\_23

absolute deviation = 2.32 | deviation change = 0.2 | maximum state number = 1

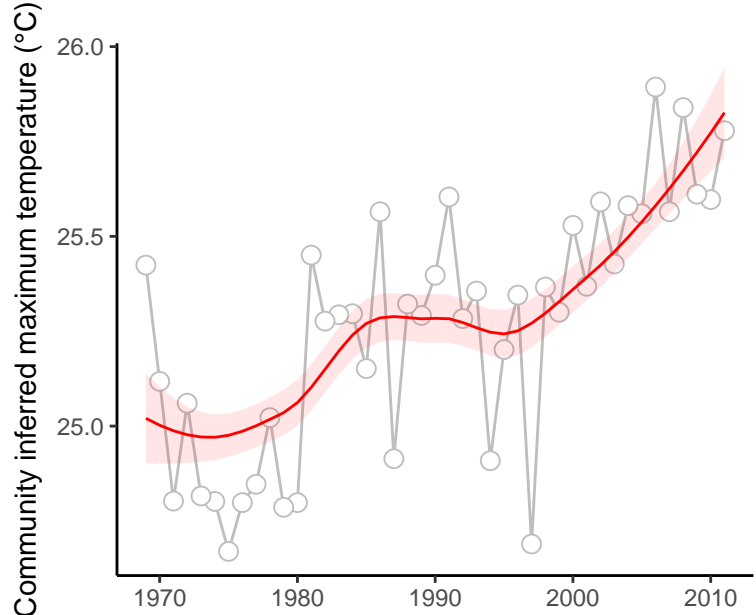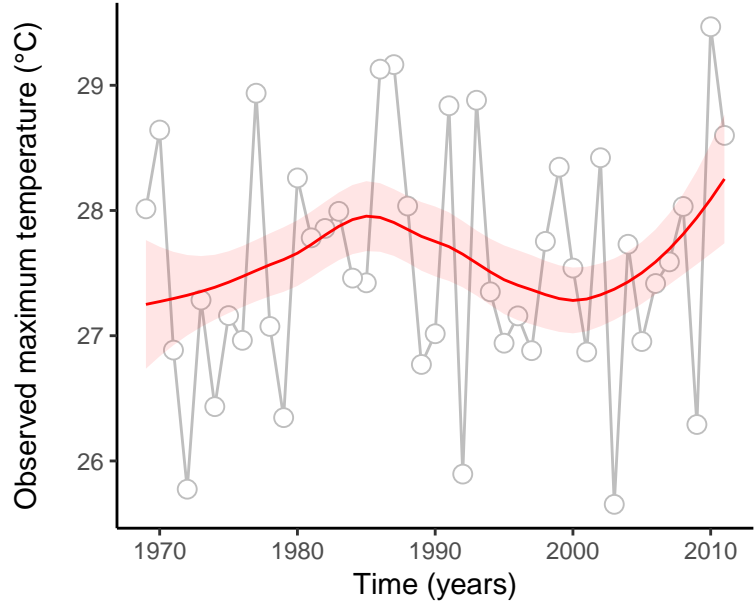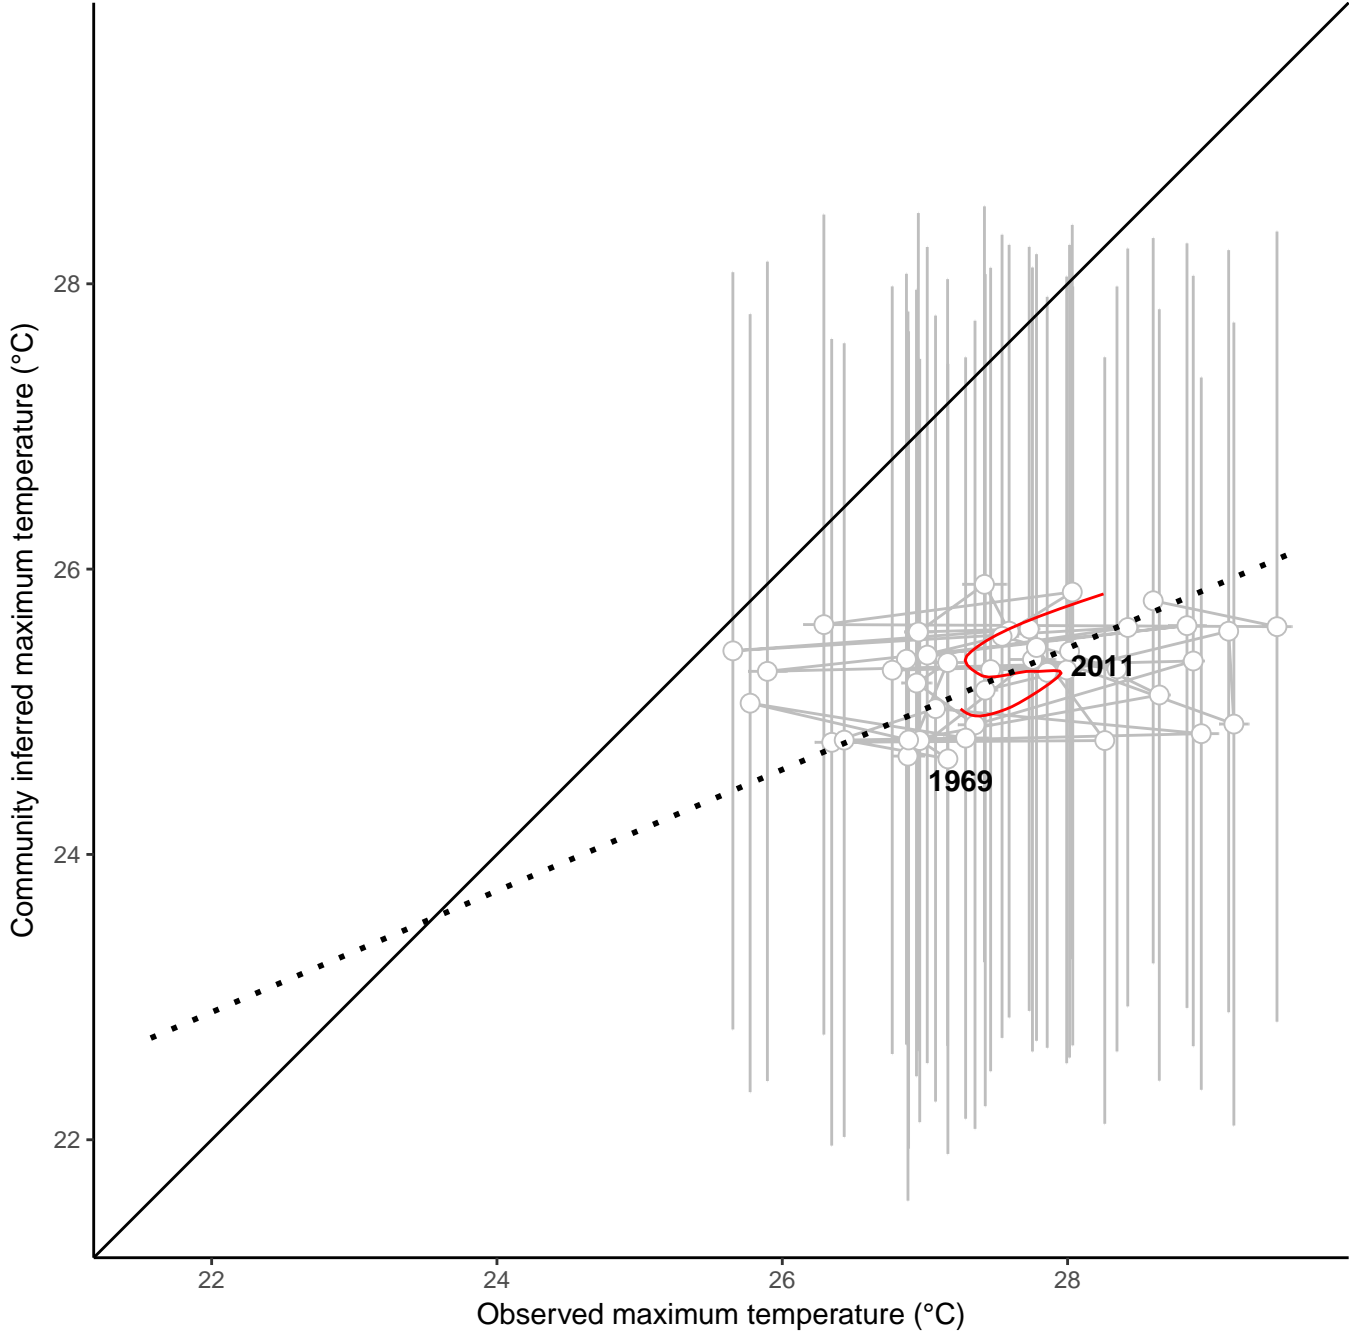

site : 840\_64\_30

absolute deviation = 0.92 | deviation change = -0.54 | maximum state number = 1

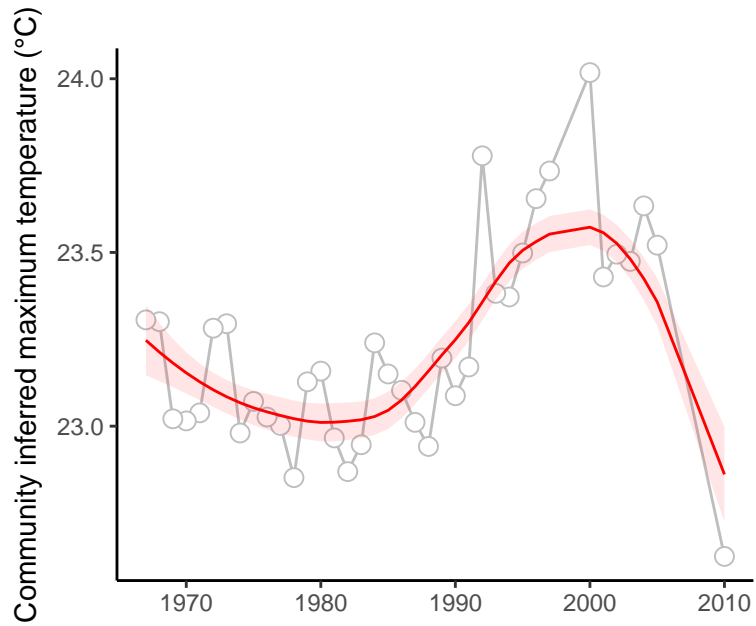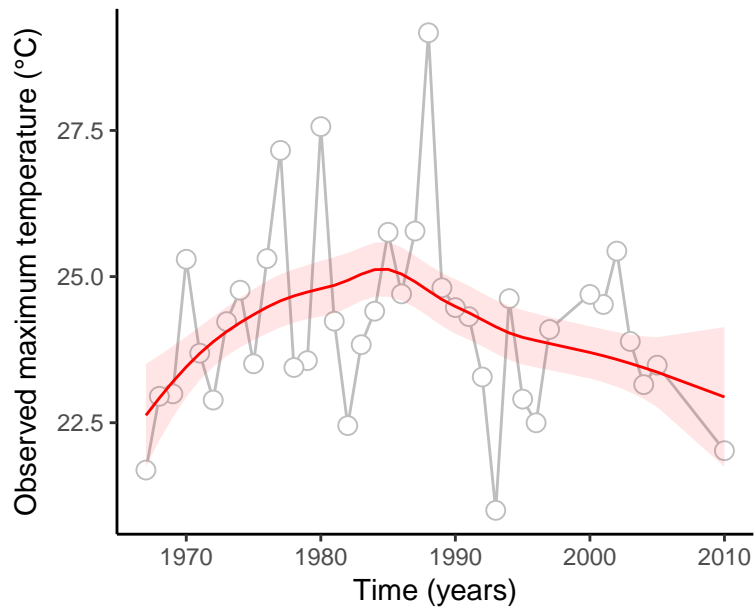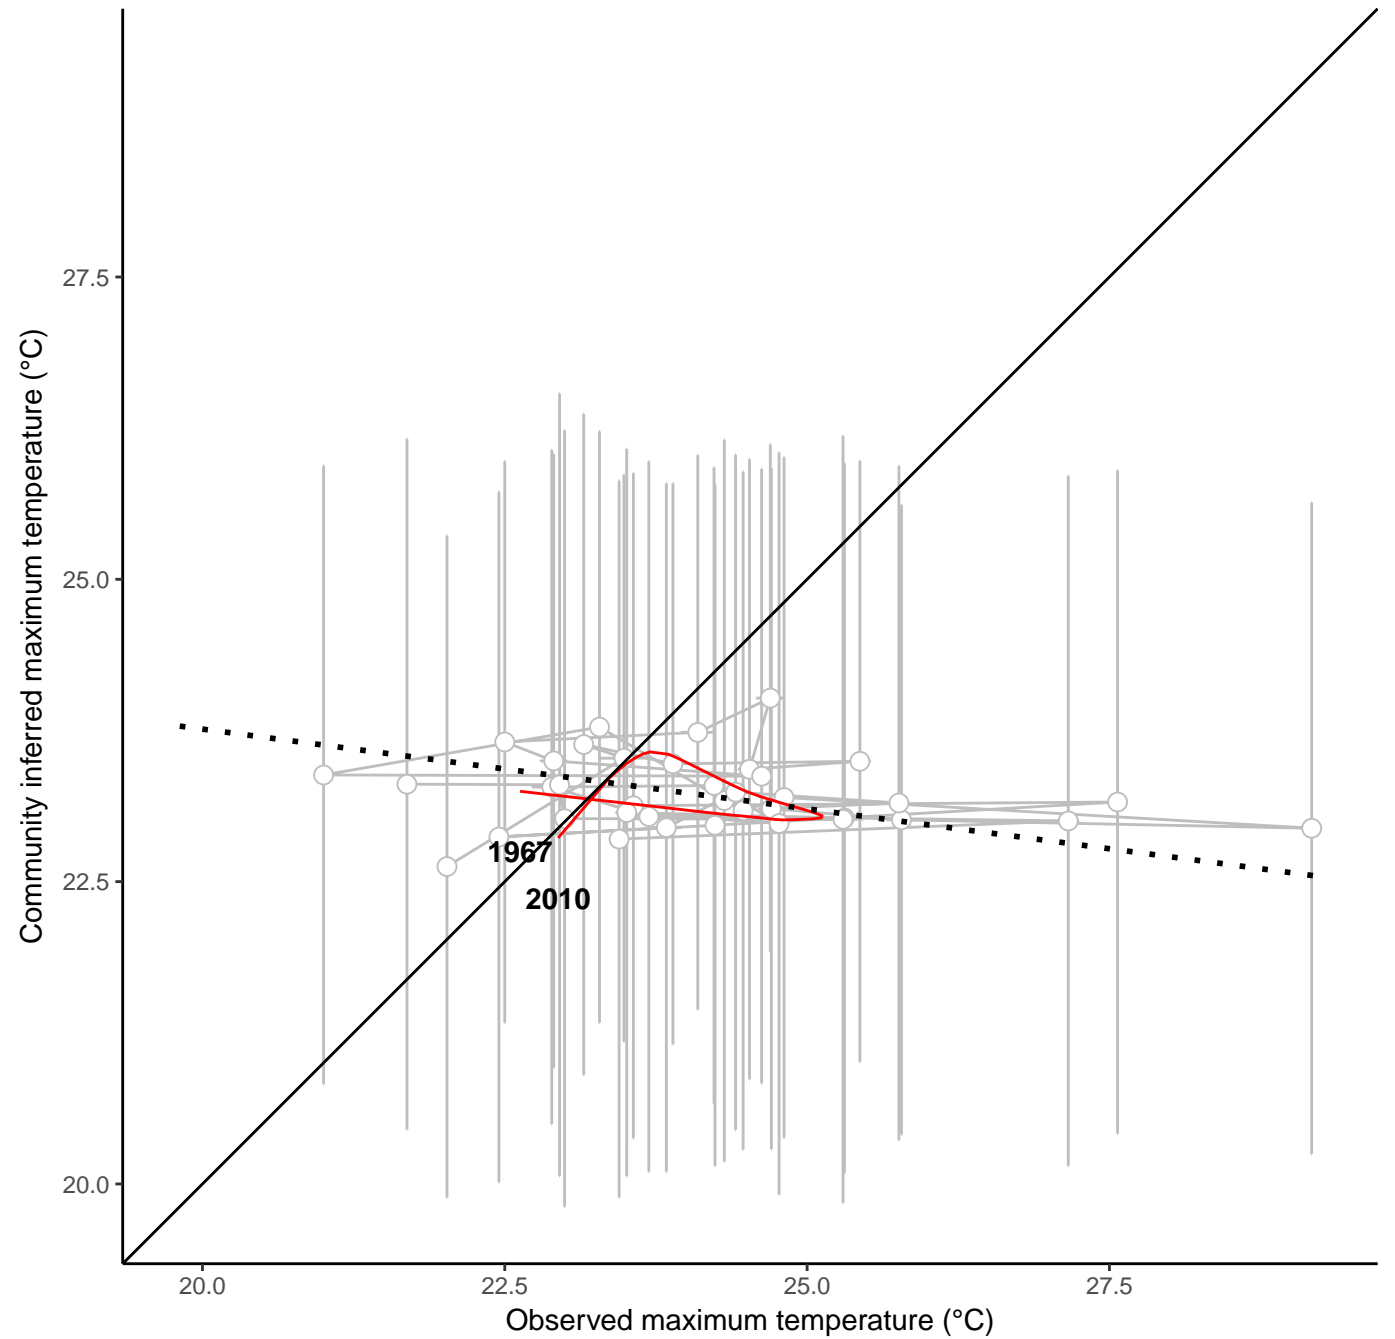

site : 840\_38\_35

absolute deviation = 4.42 | deviation change = 0.28 | maximum state number = 1

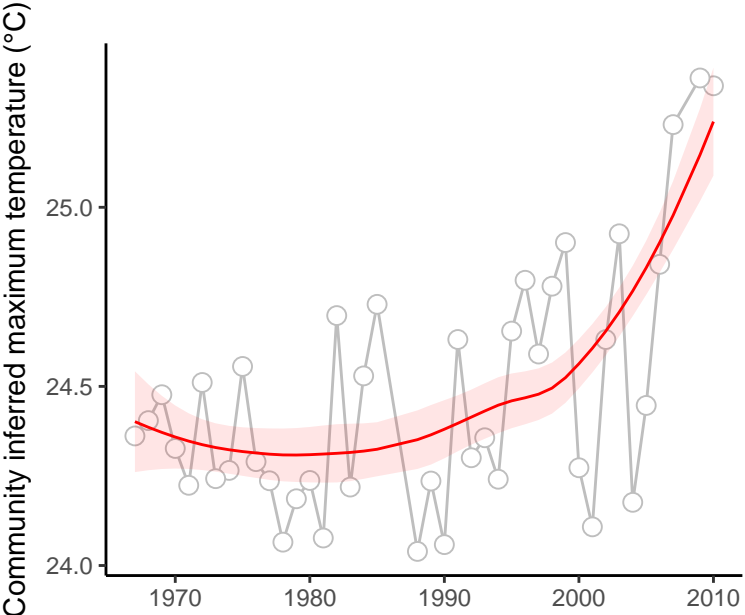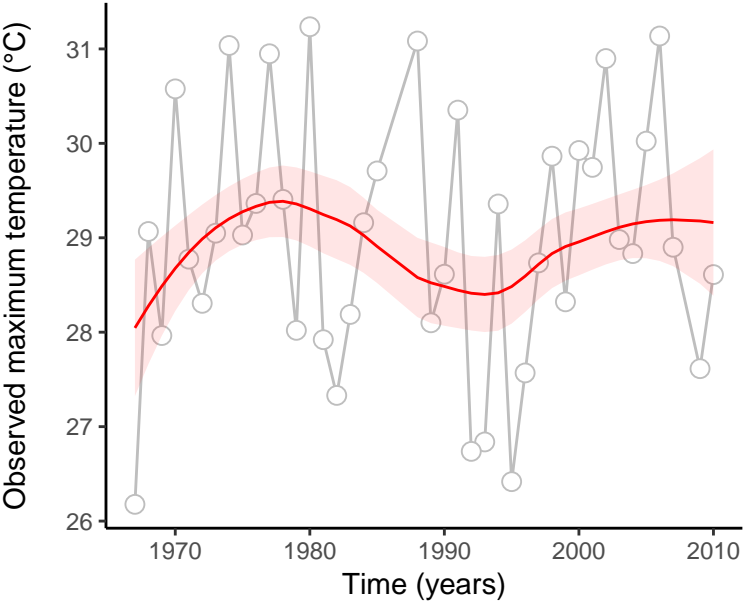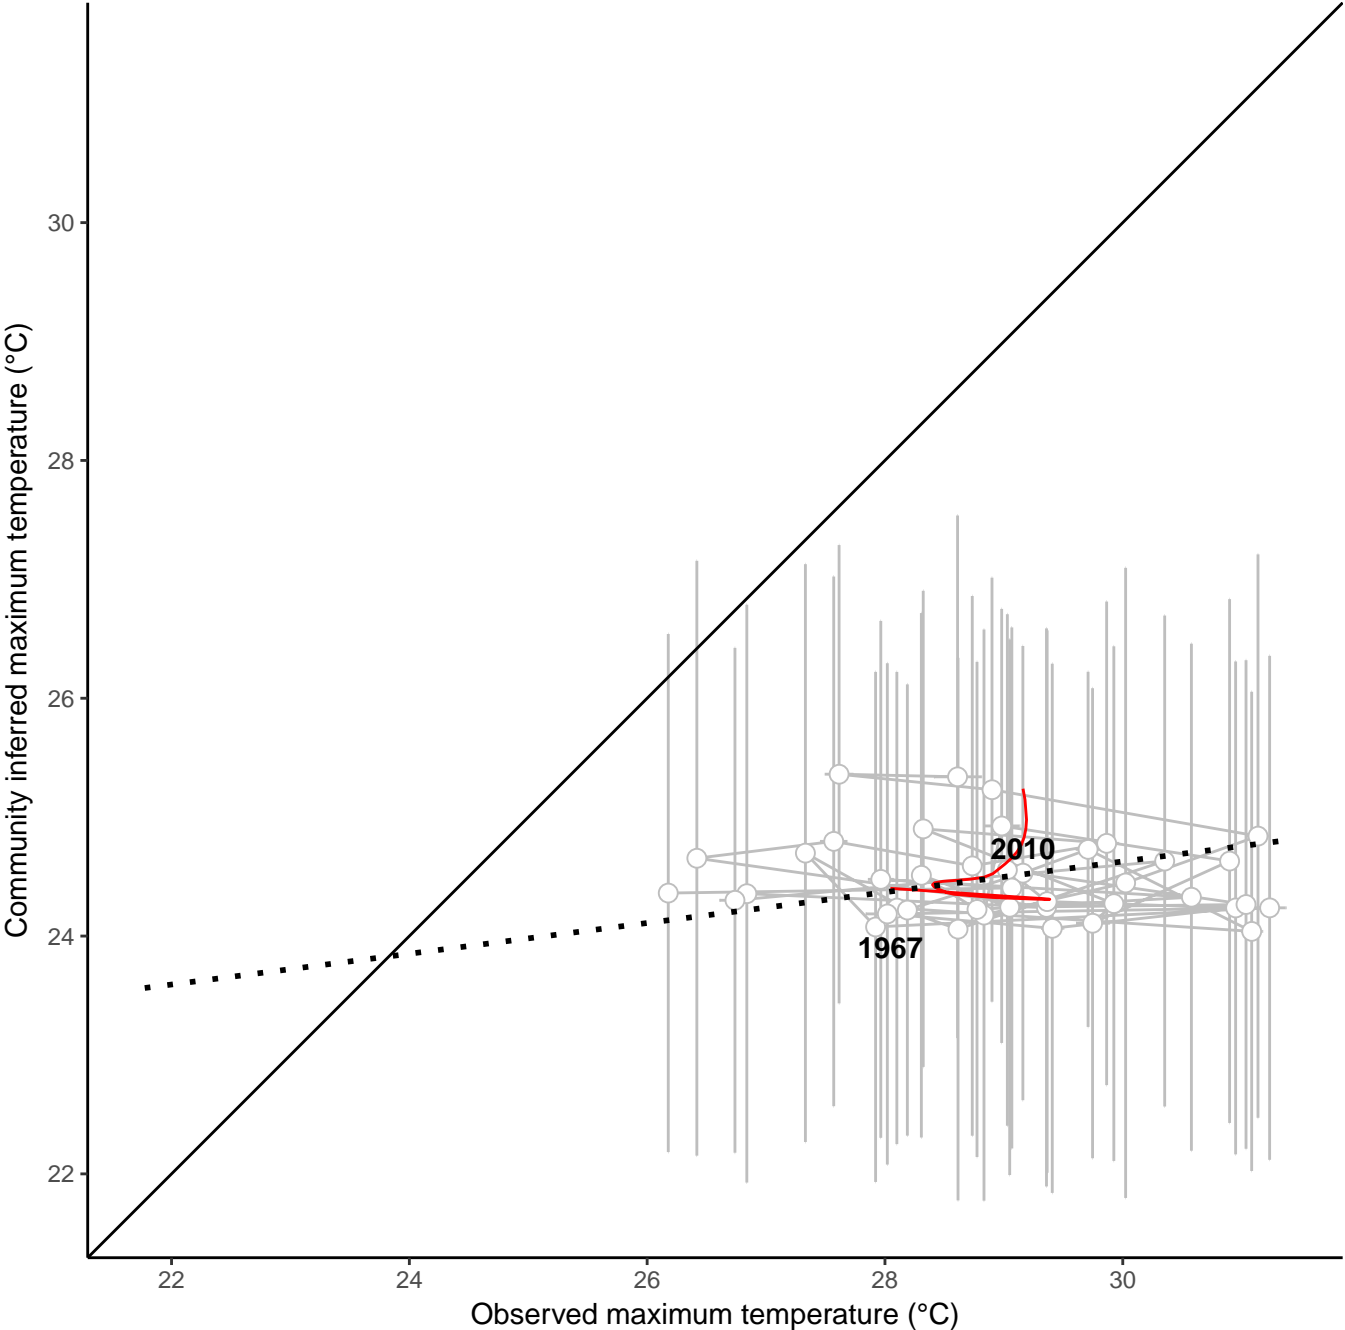

site : 840\_89\_1

absolute deviation = 0.85 | deviation change = 1.24 | maximum state number = 2

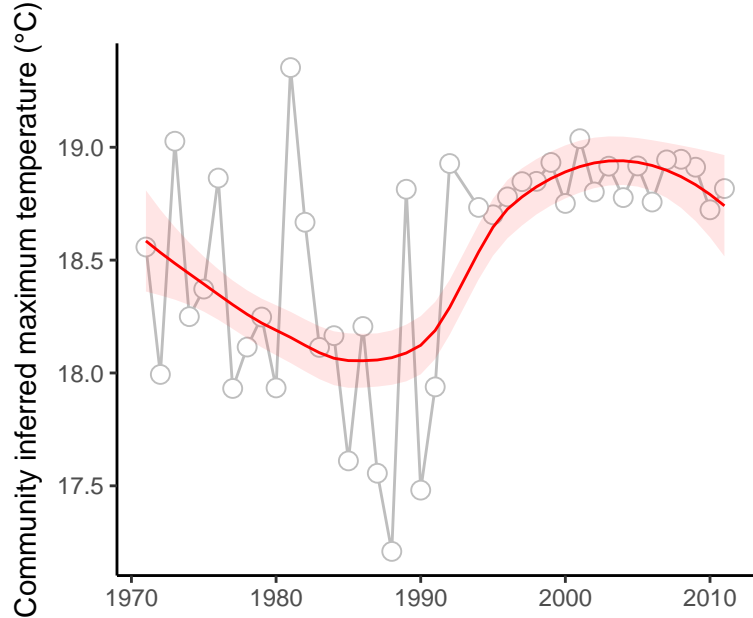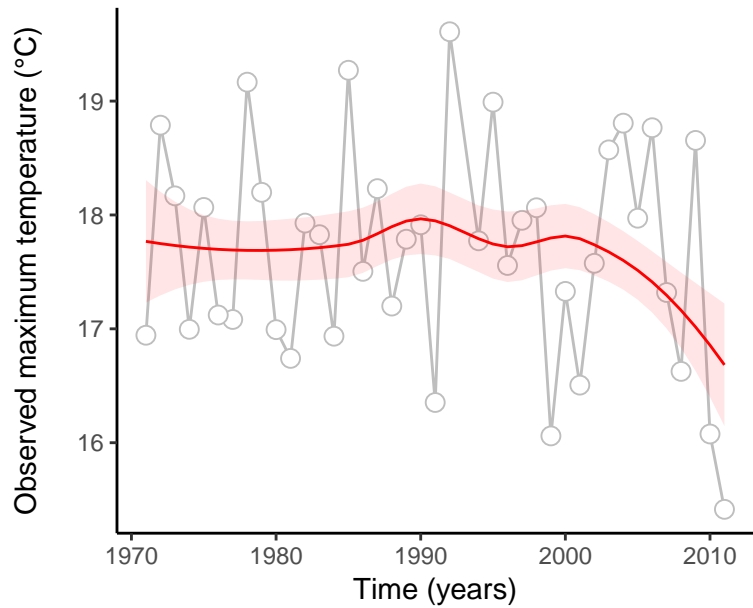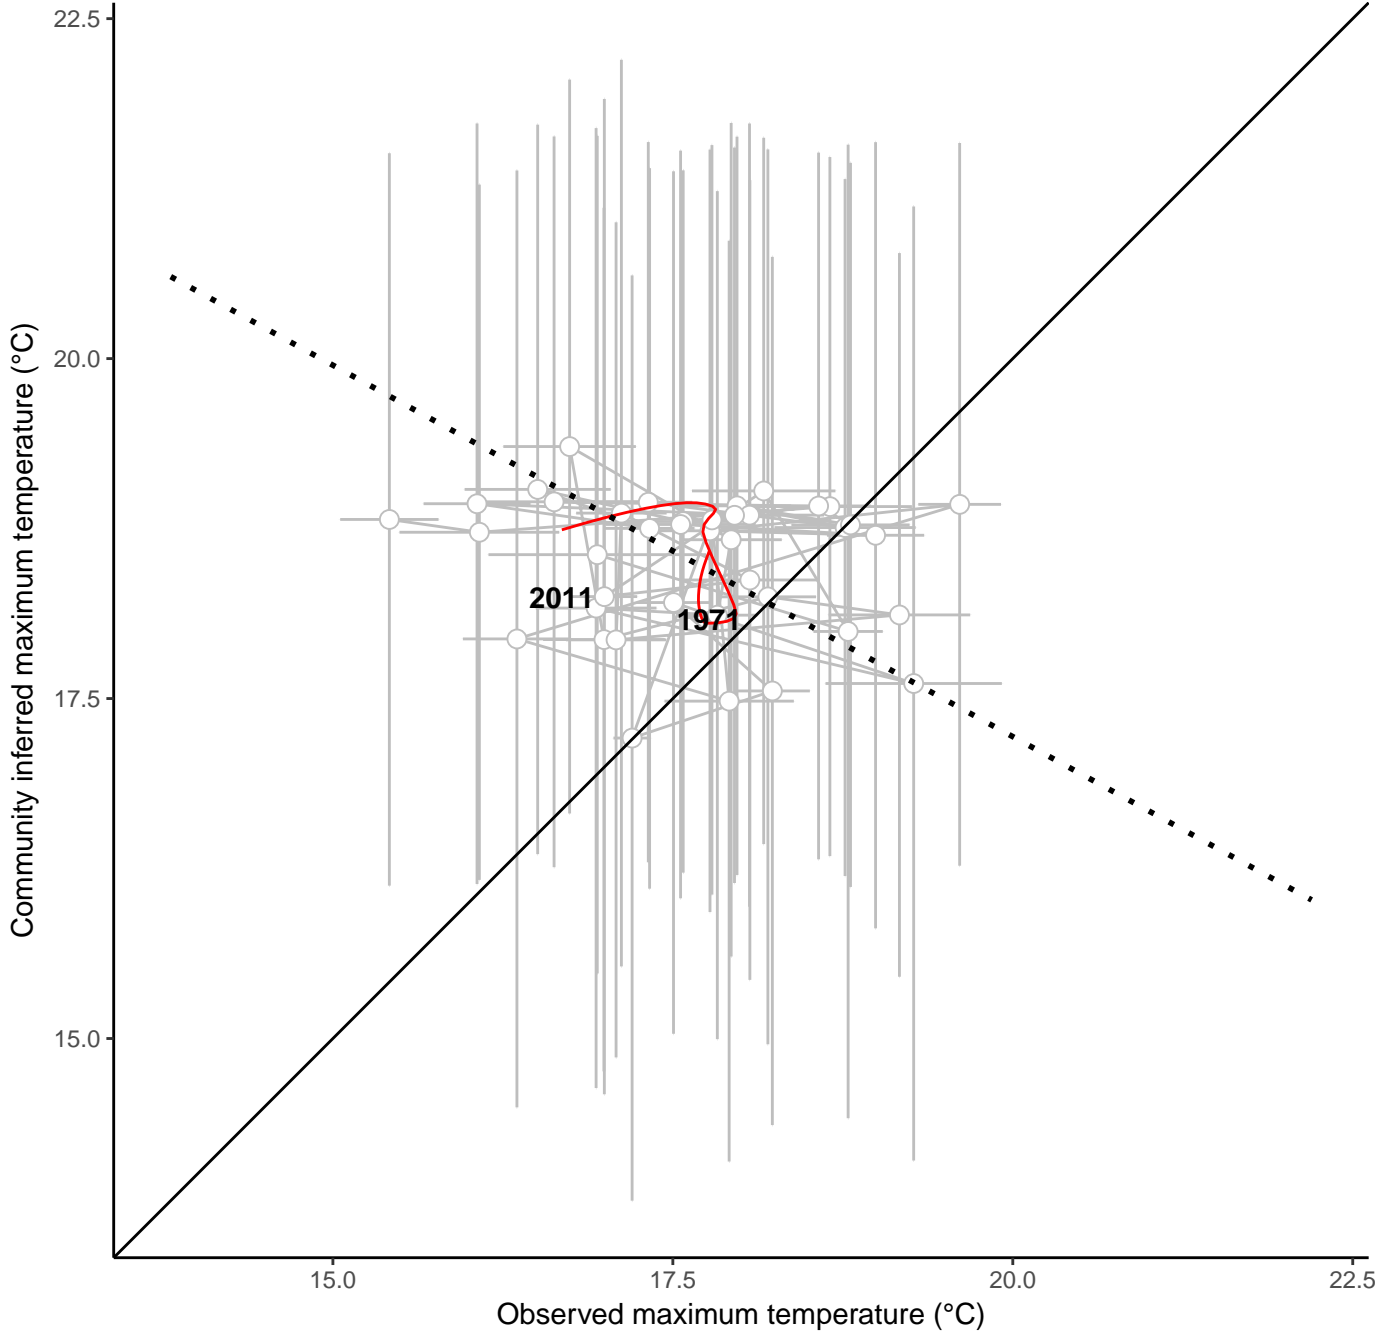

site : 840\_91\_3

absolute deviation = 1 | deviation change = 0.49 | maximum state number = 1

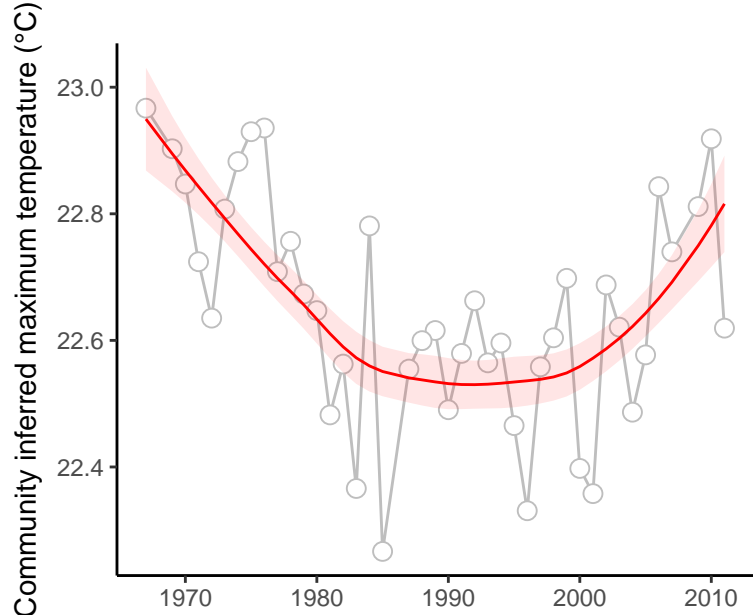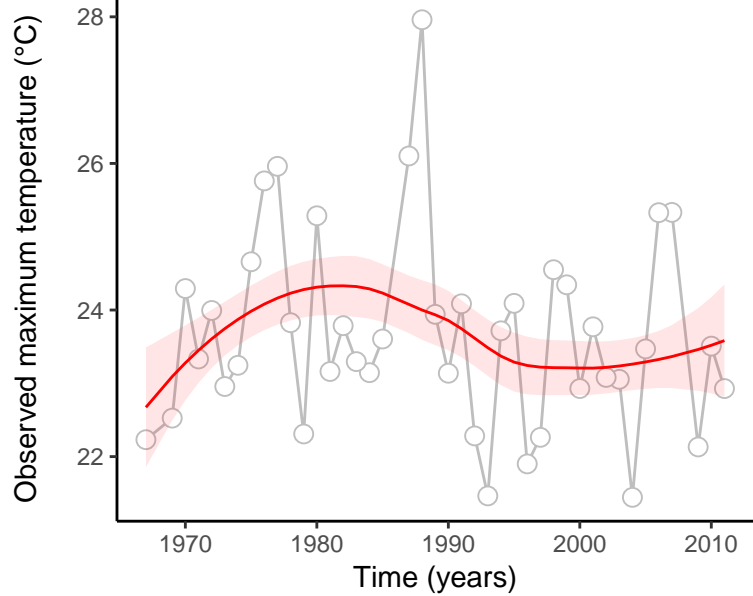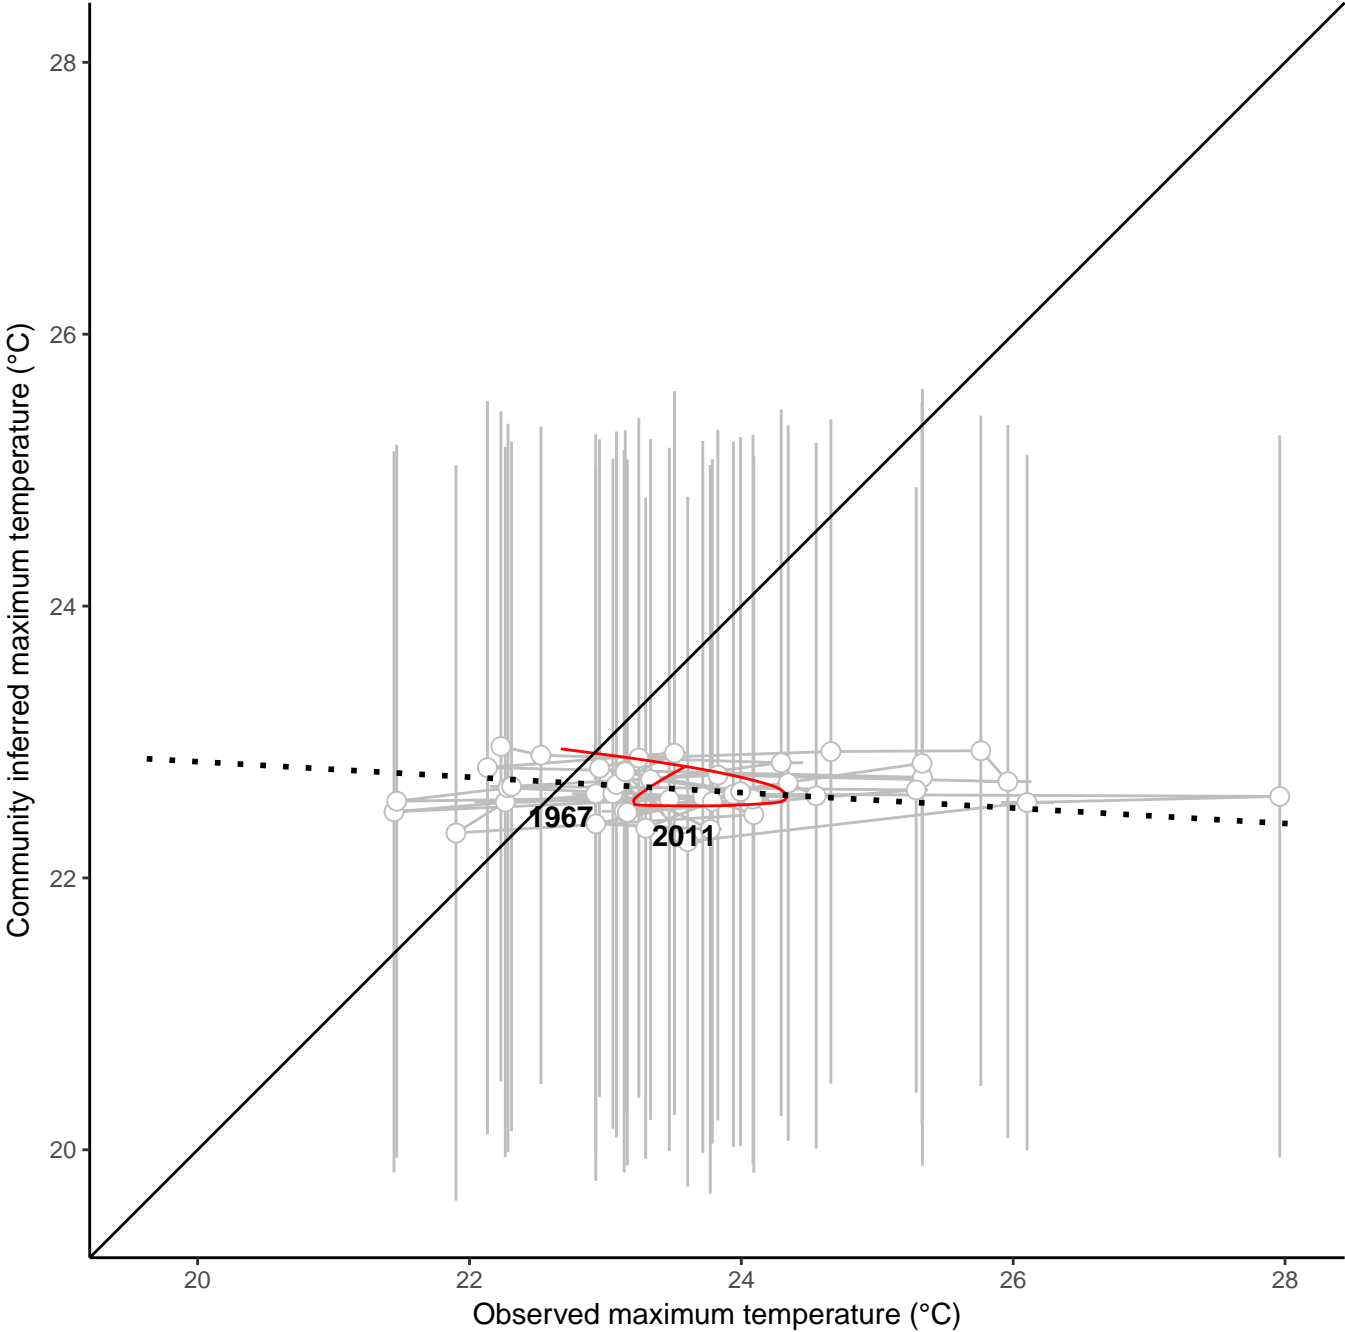



site : 840\_38\_8

absolute deviation = 5.7 | deviation change = 1.19 | maximum state number = 1

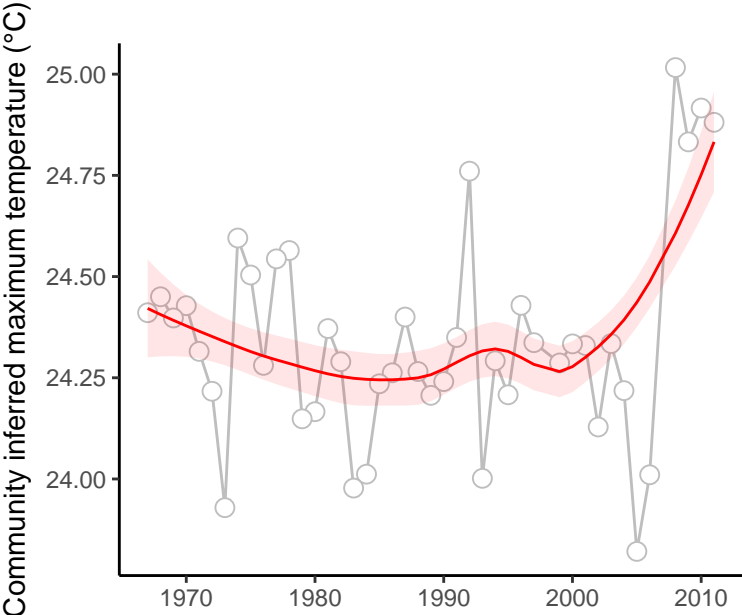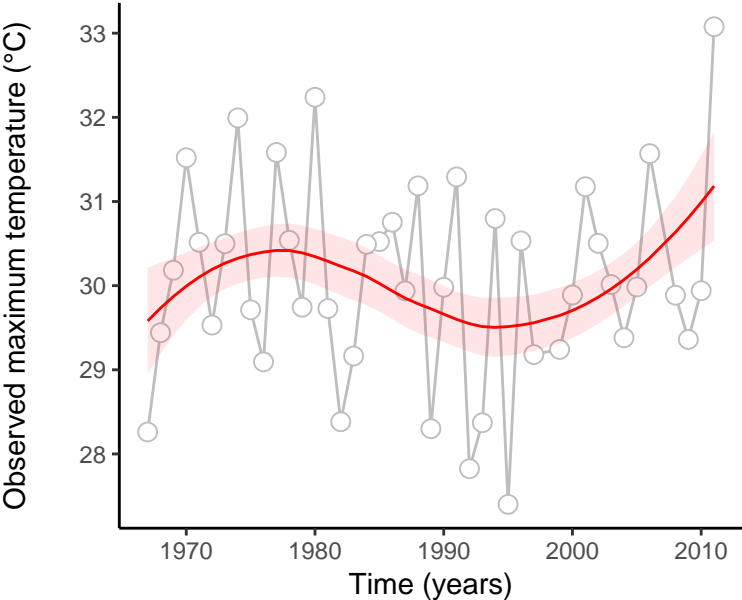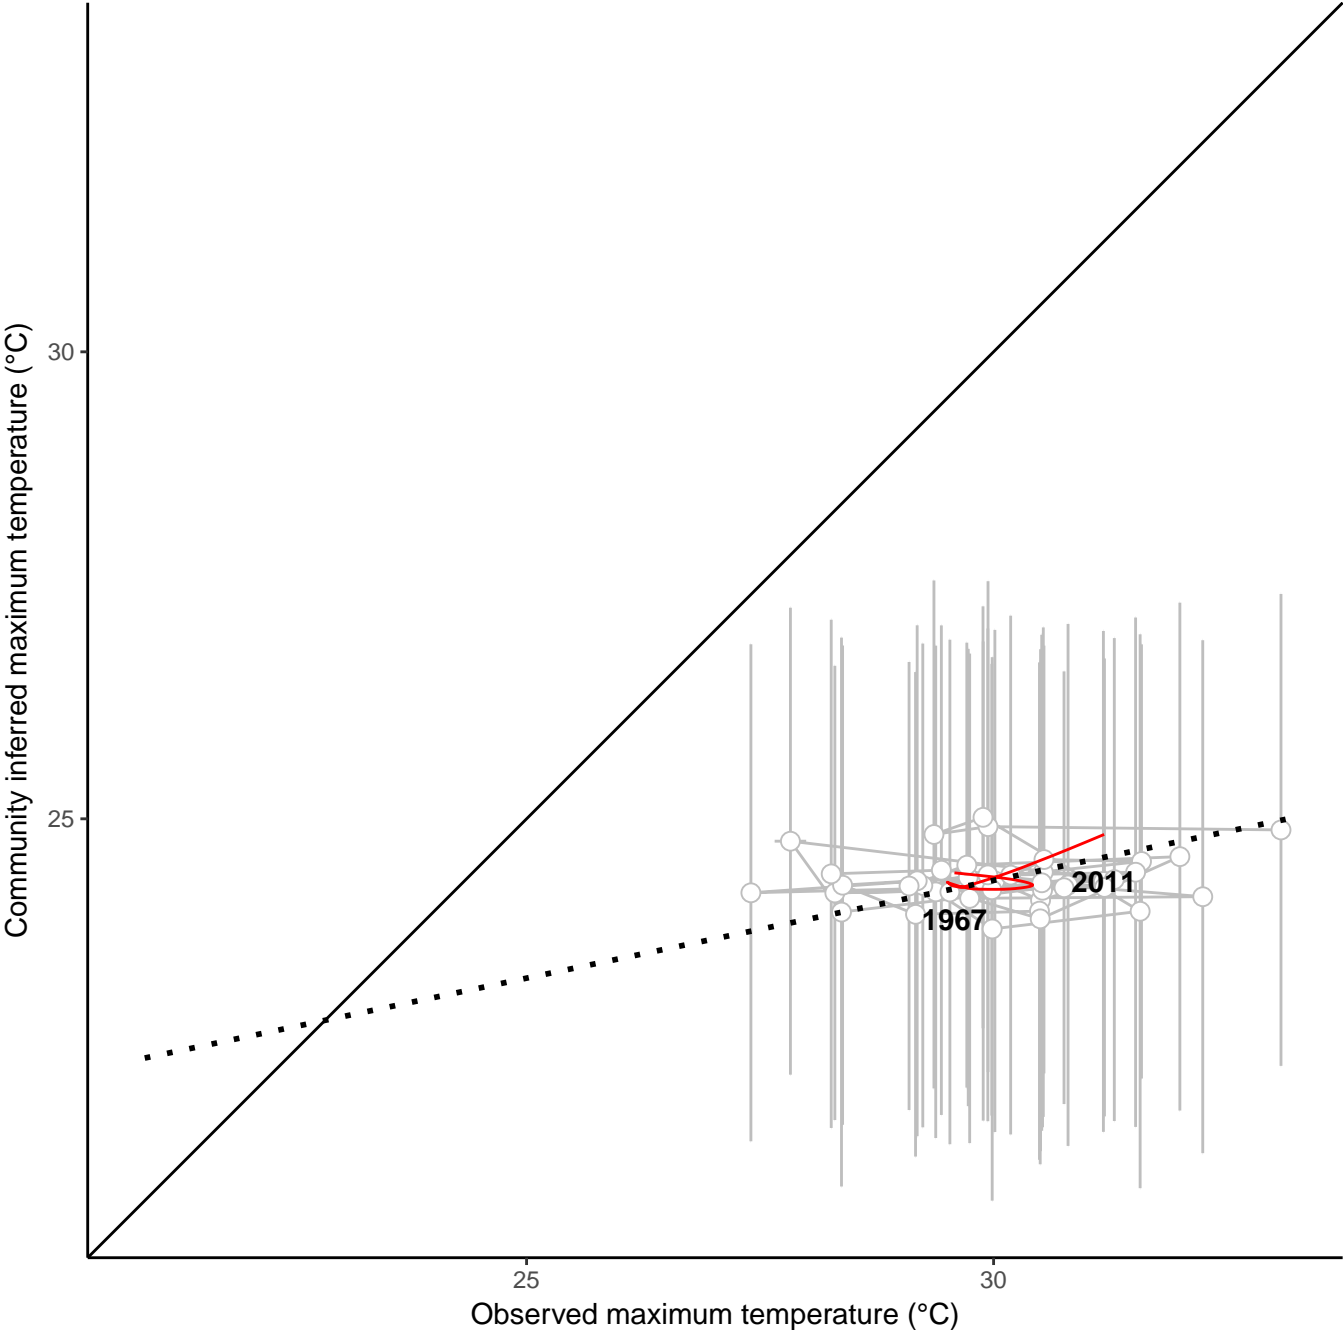

site : 840\_91\_2

absolute deviation = 0.68 | deviation change = -0.03 | maximum state number = 1

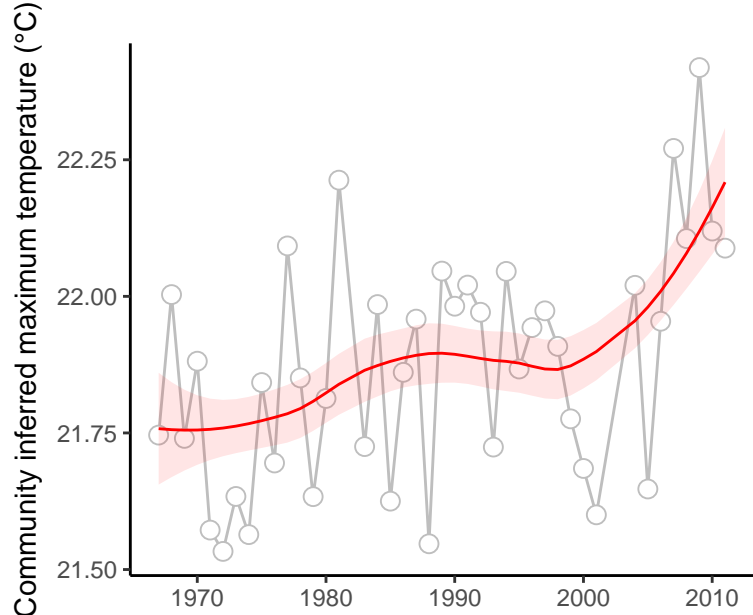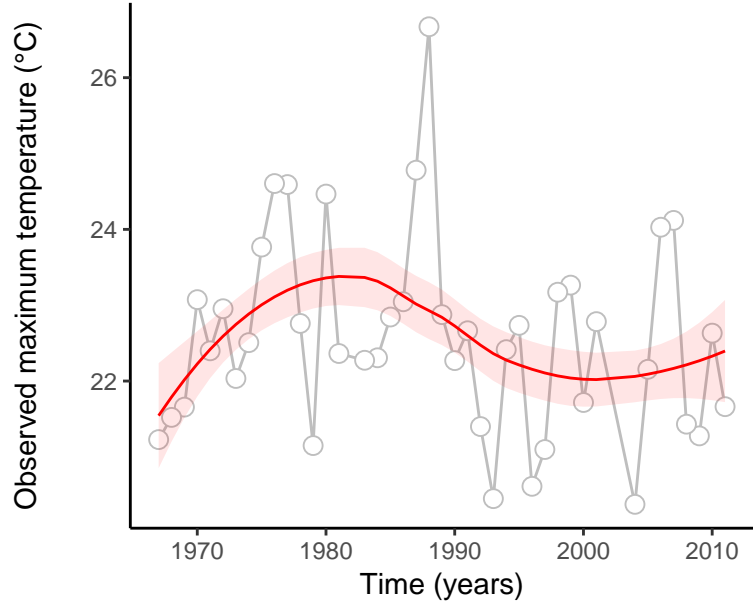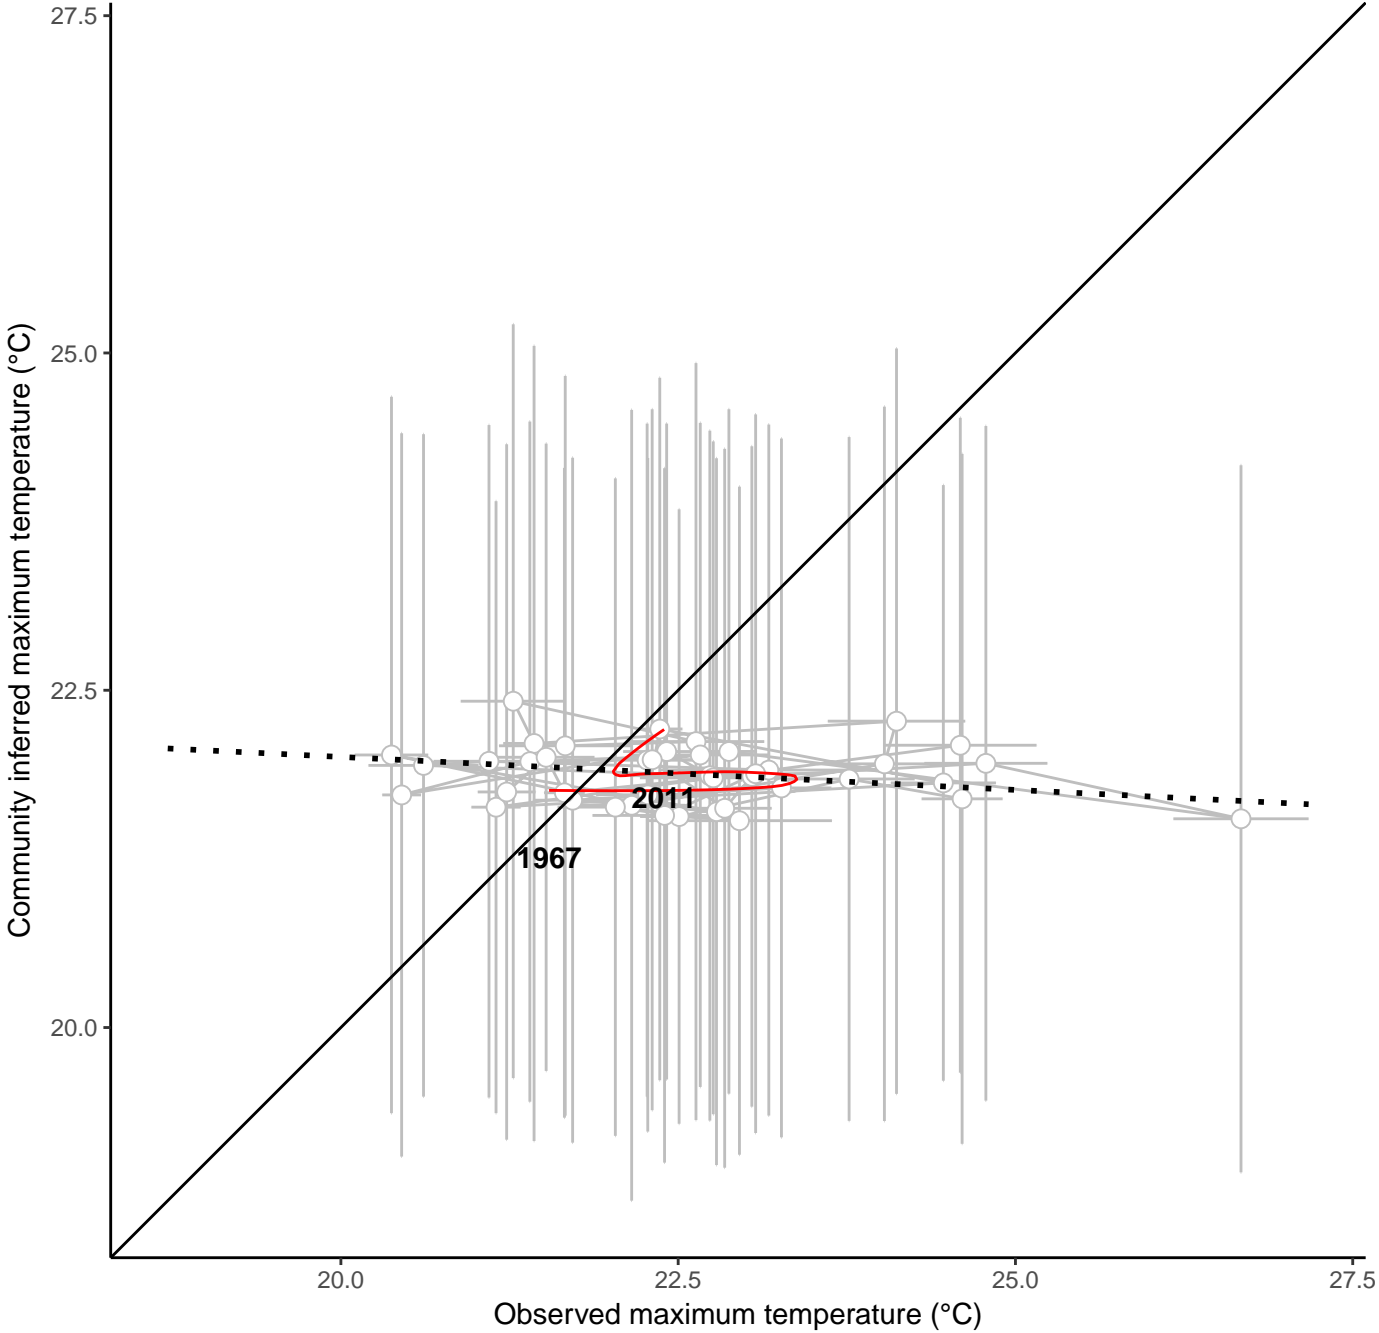

site : 840\_58\_6

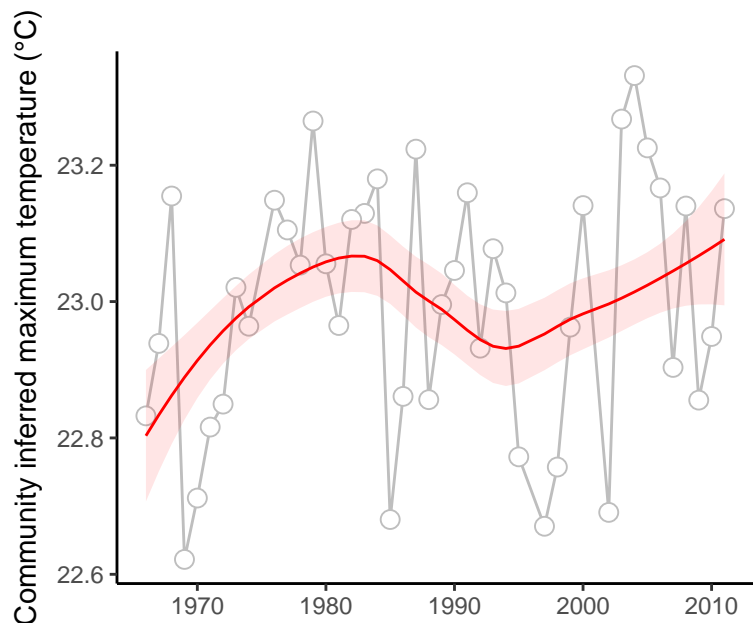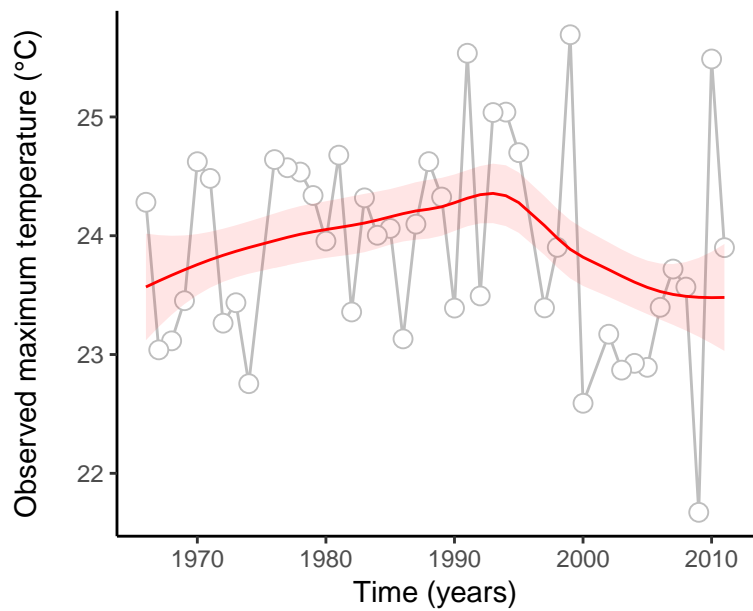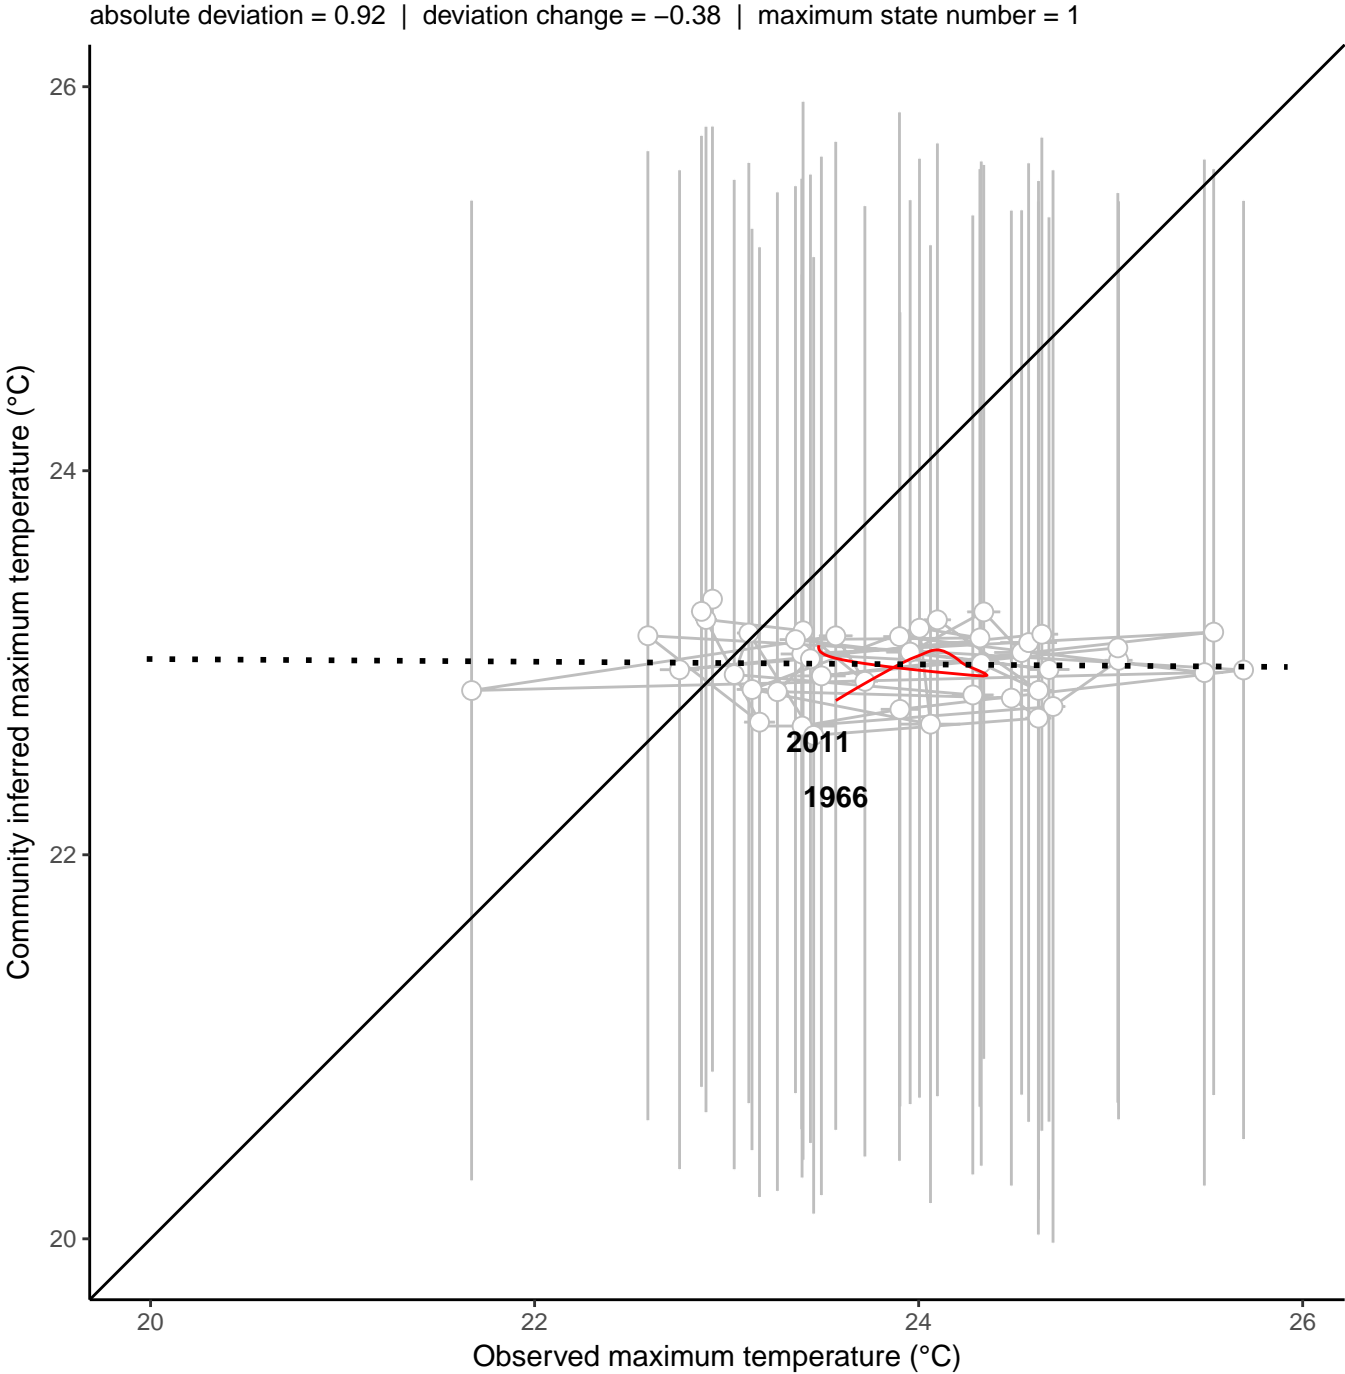

site : 840\_44\_24

absolute deviation = 0.57 | deviation change = 1.36 | maximum state number = 2

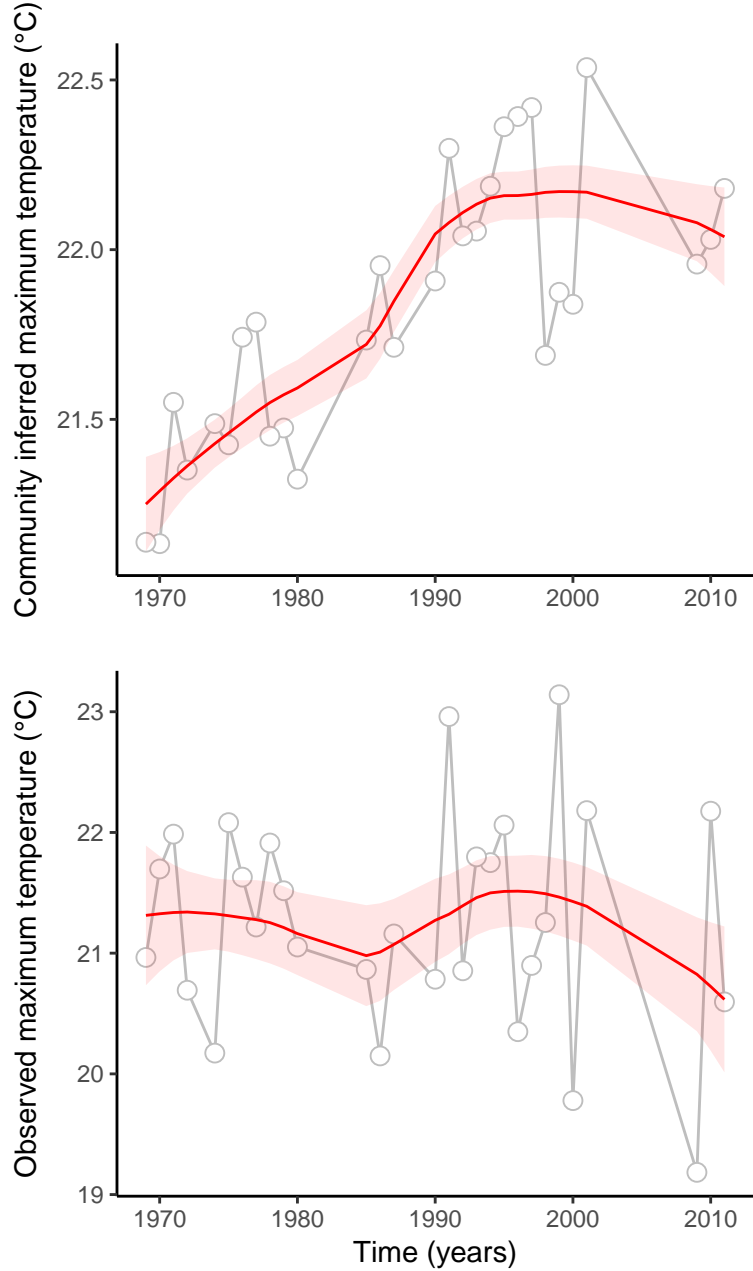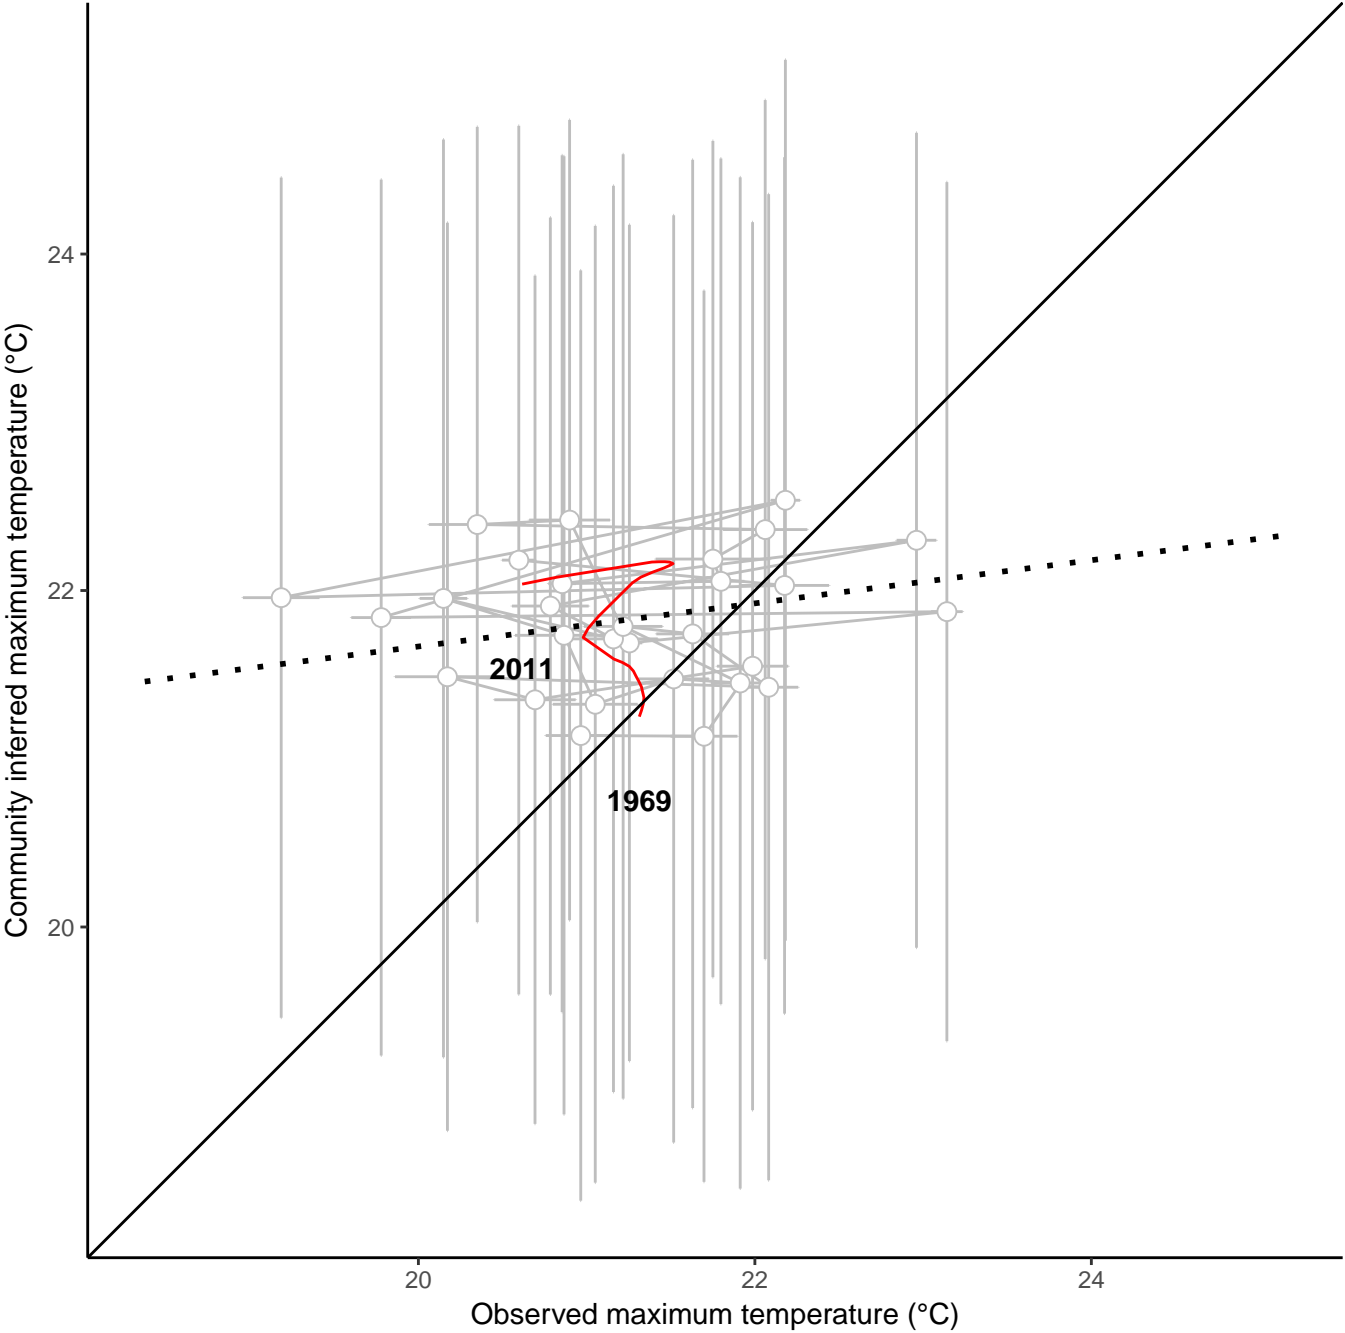

site : 840\_49\_41

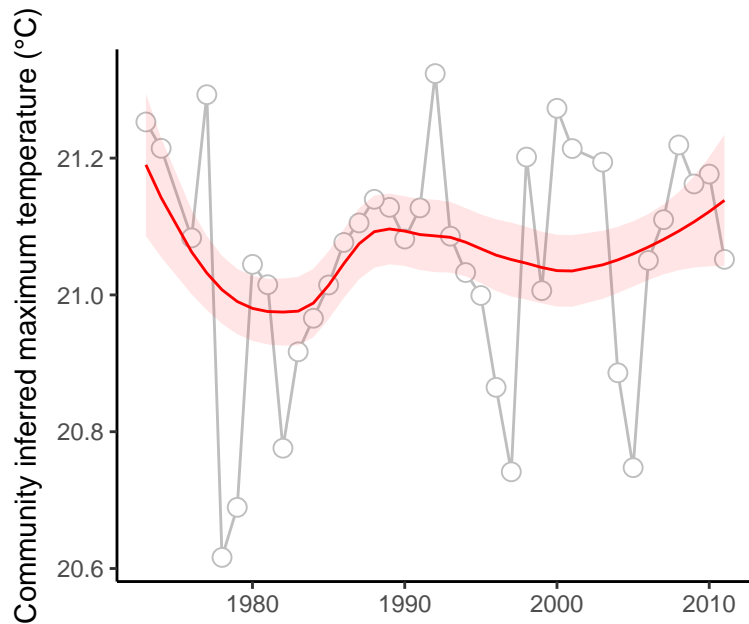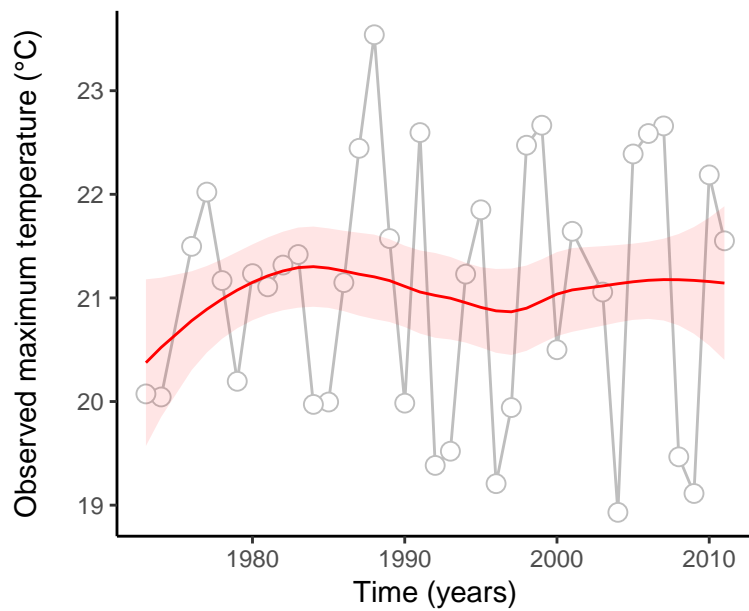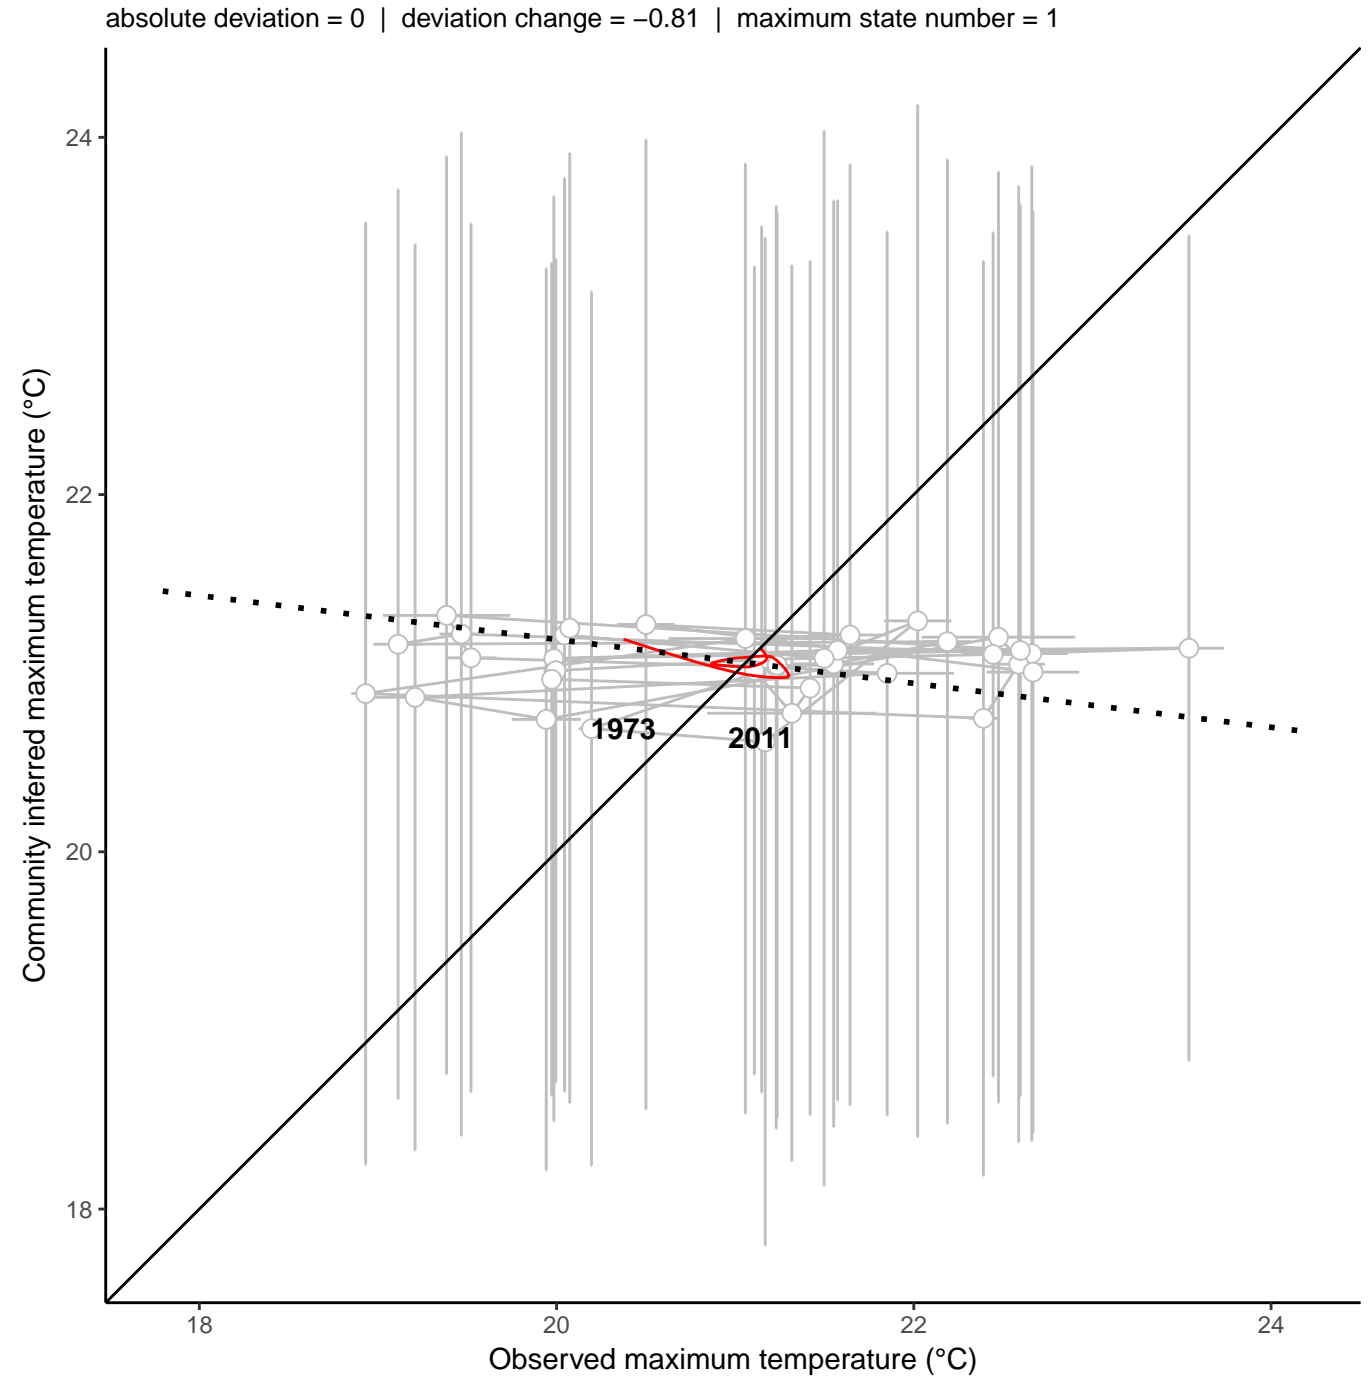

site : 840\_50\_32

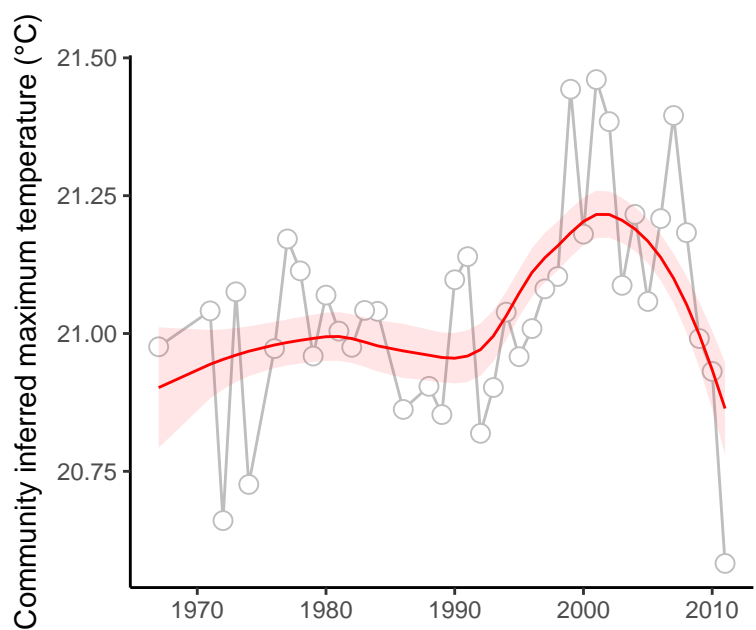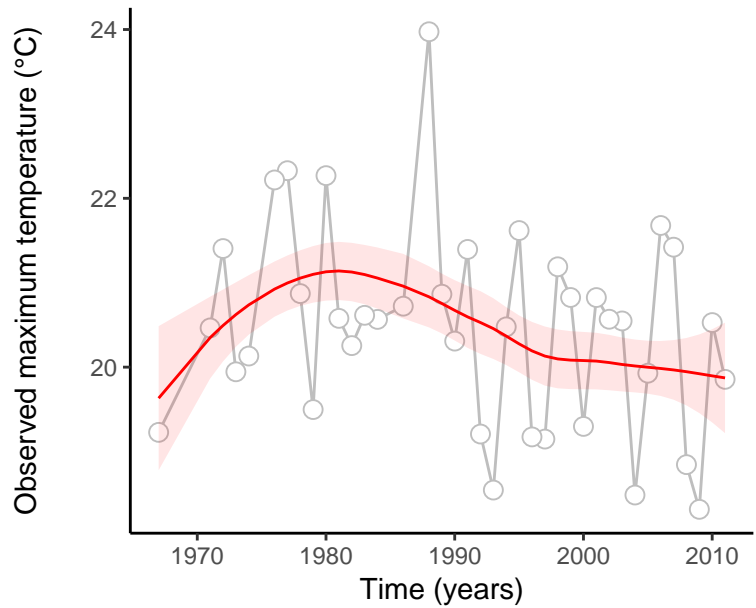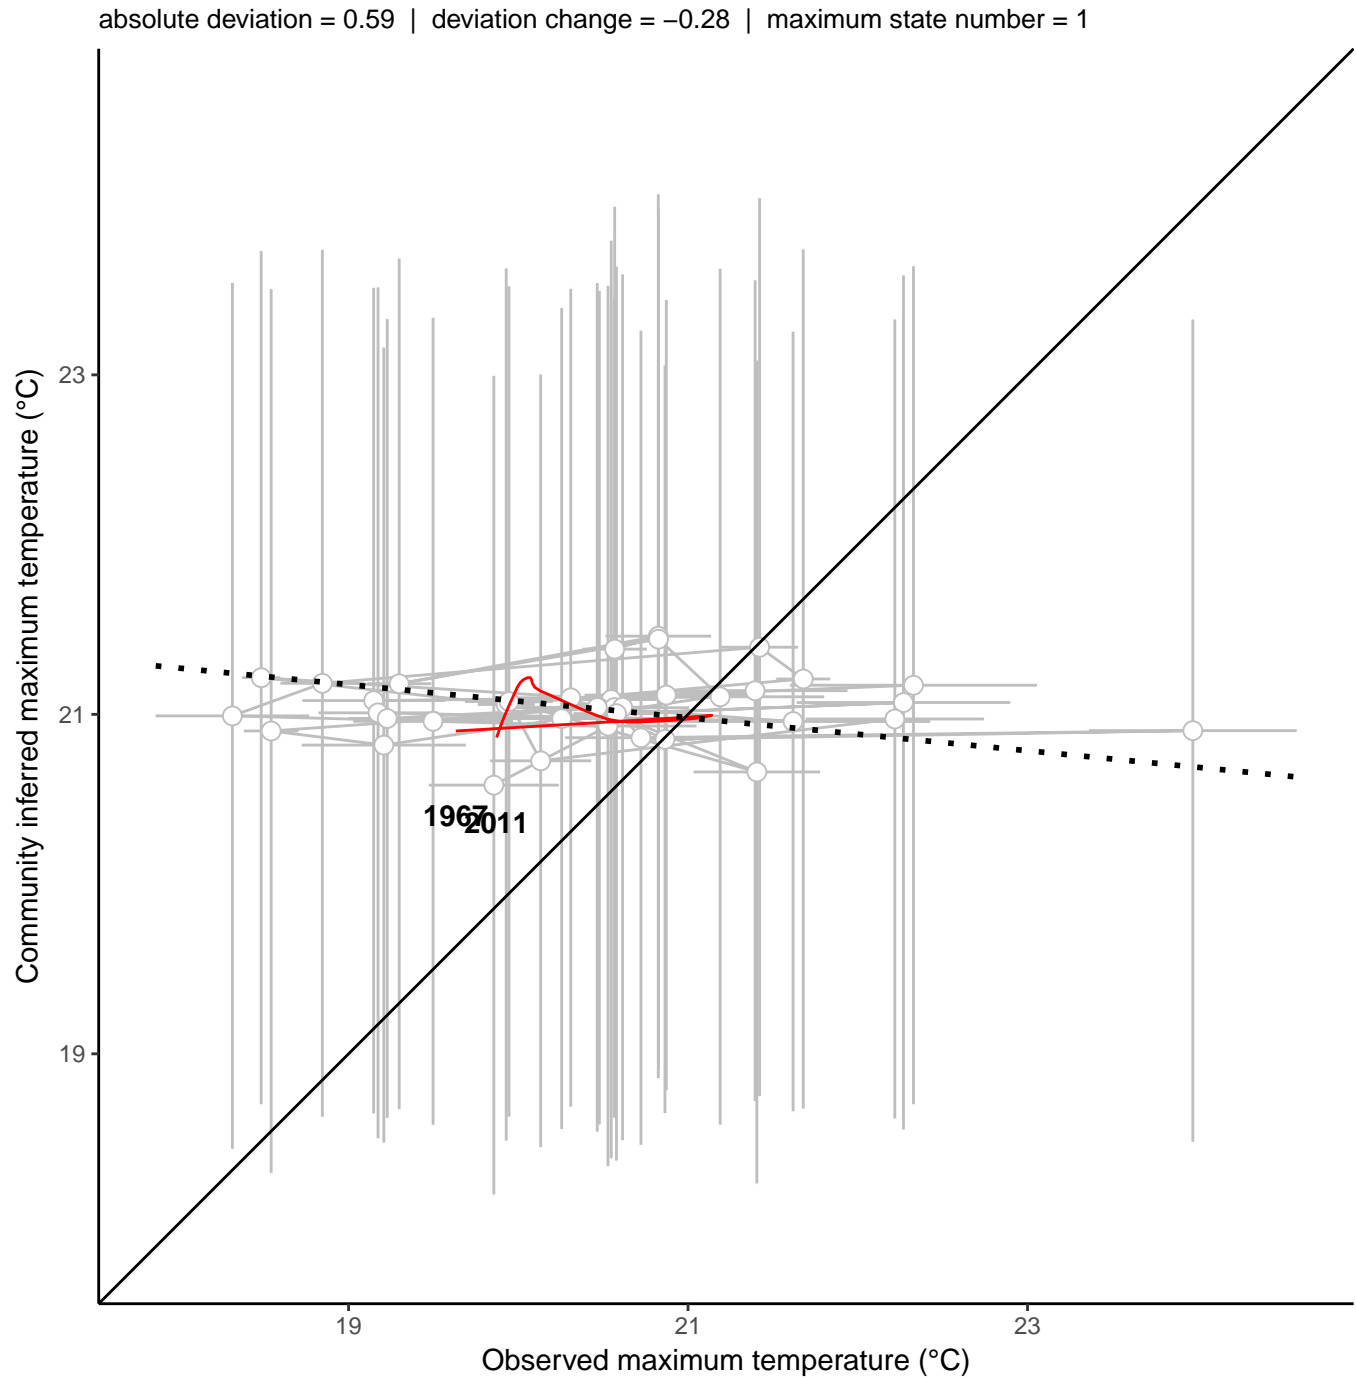

site : 840\_44\_3

absolute deviation = 0.49 | deviation change = 0.55 | maximum state number = 1

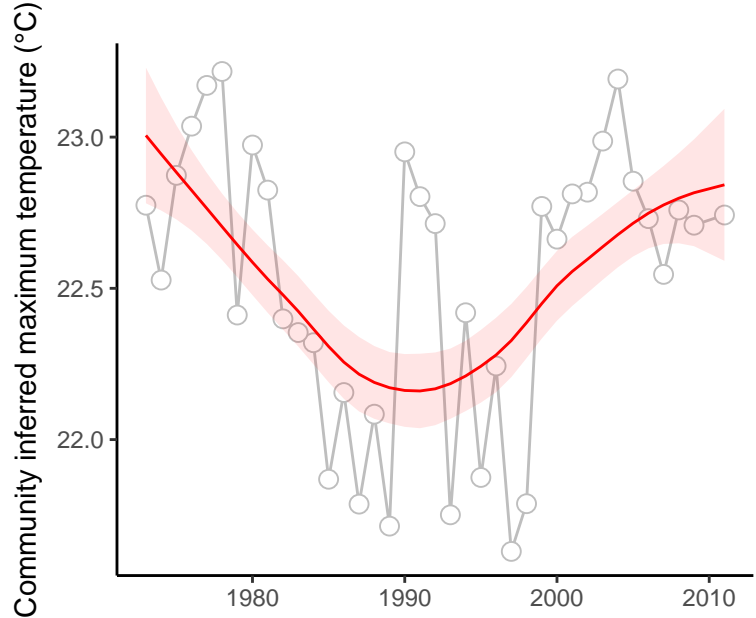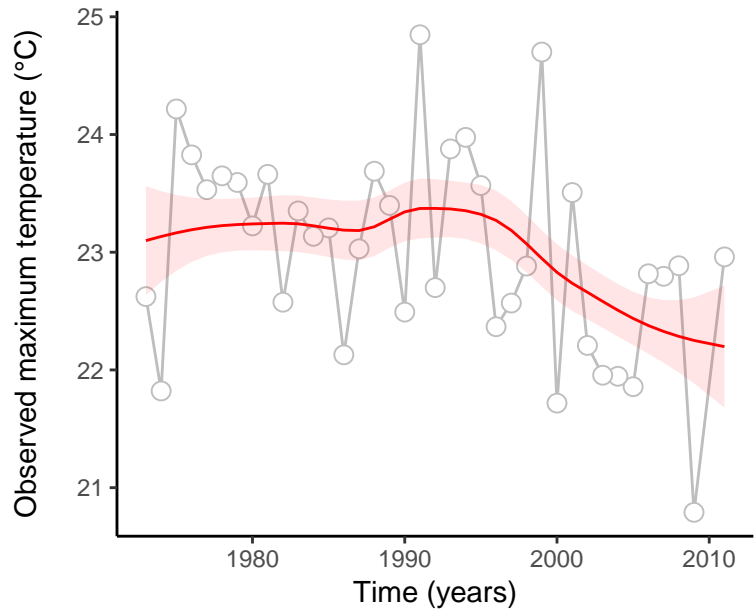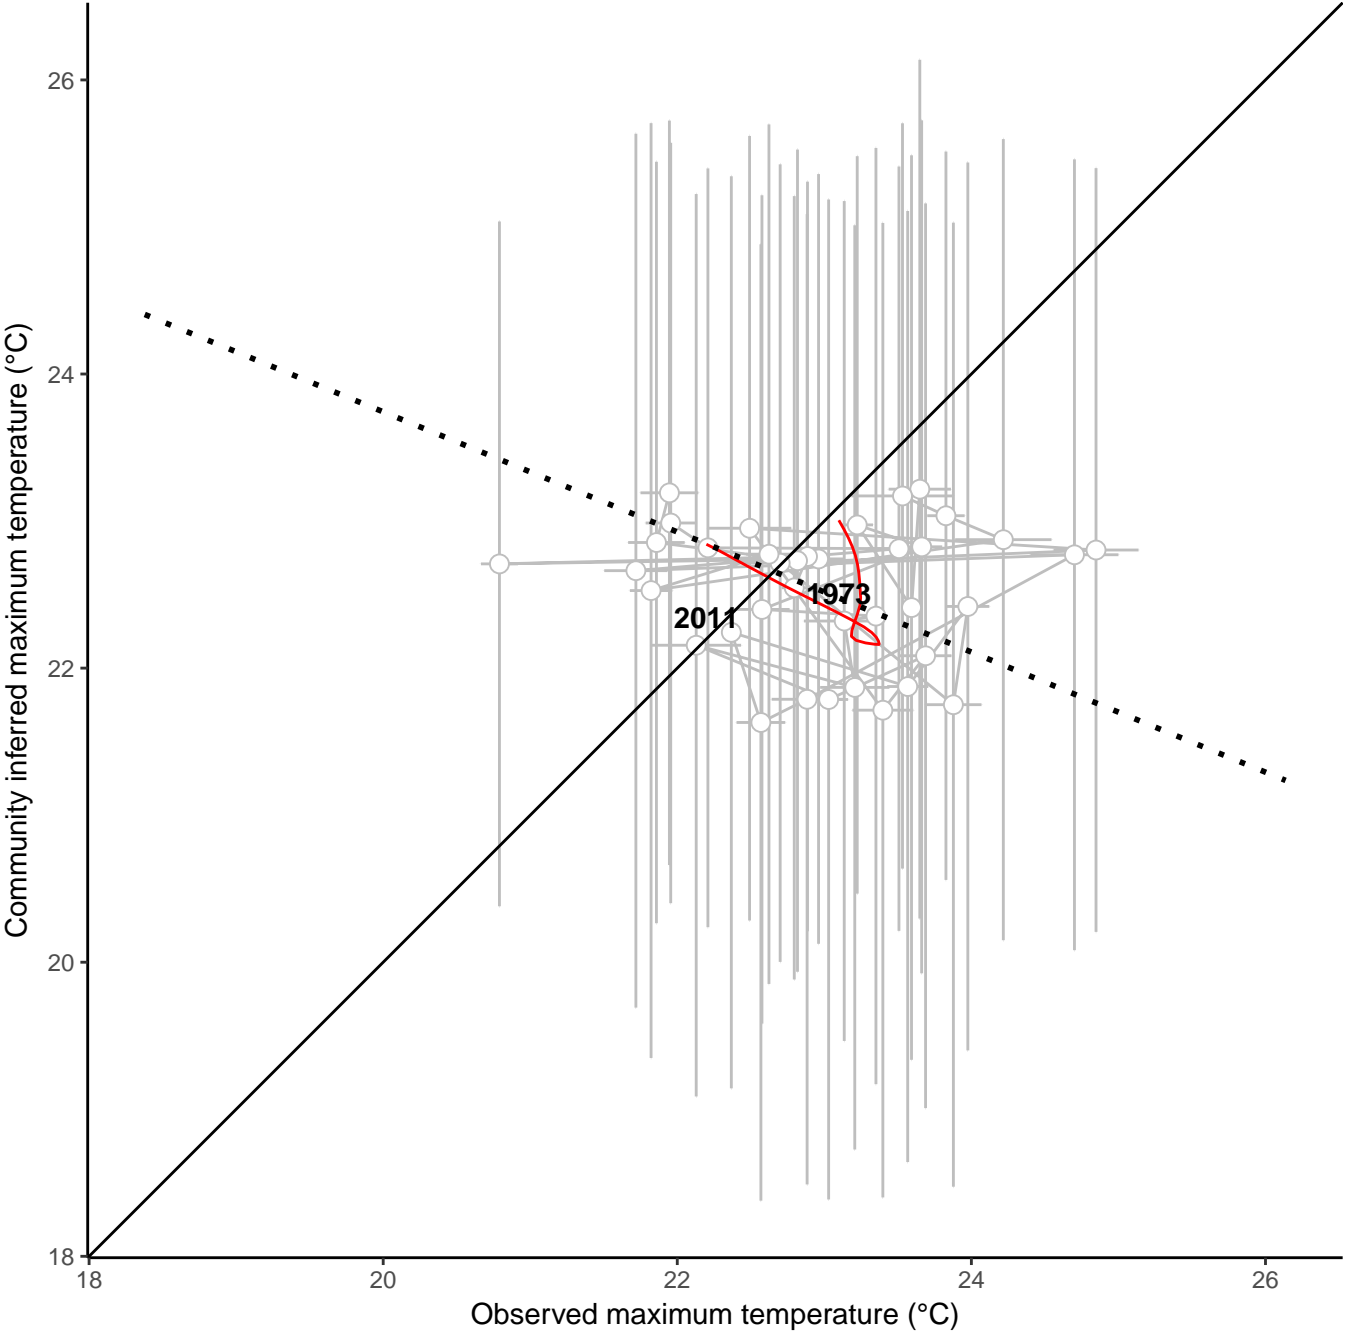

site : 840\_58\_18

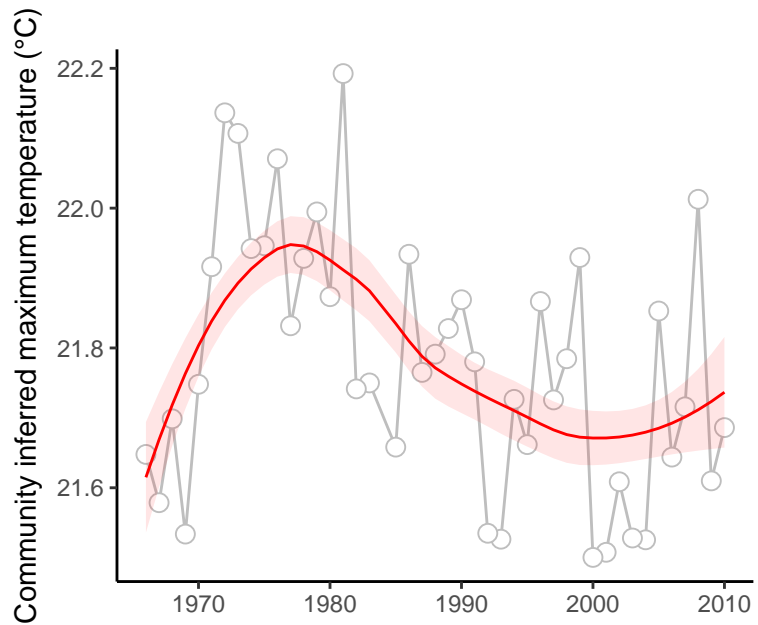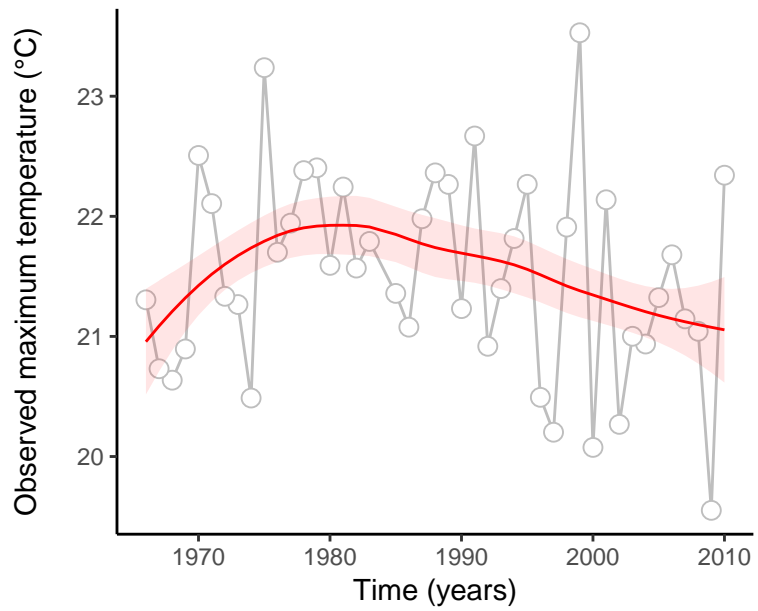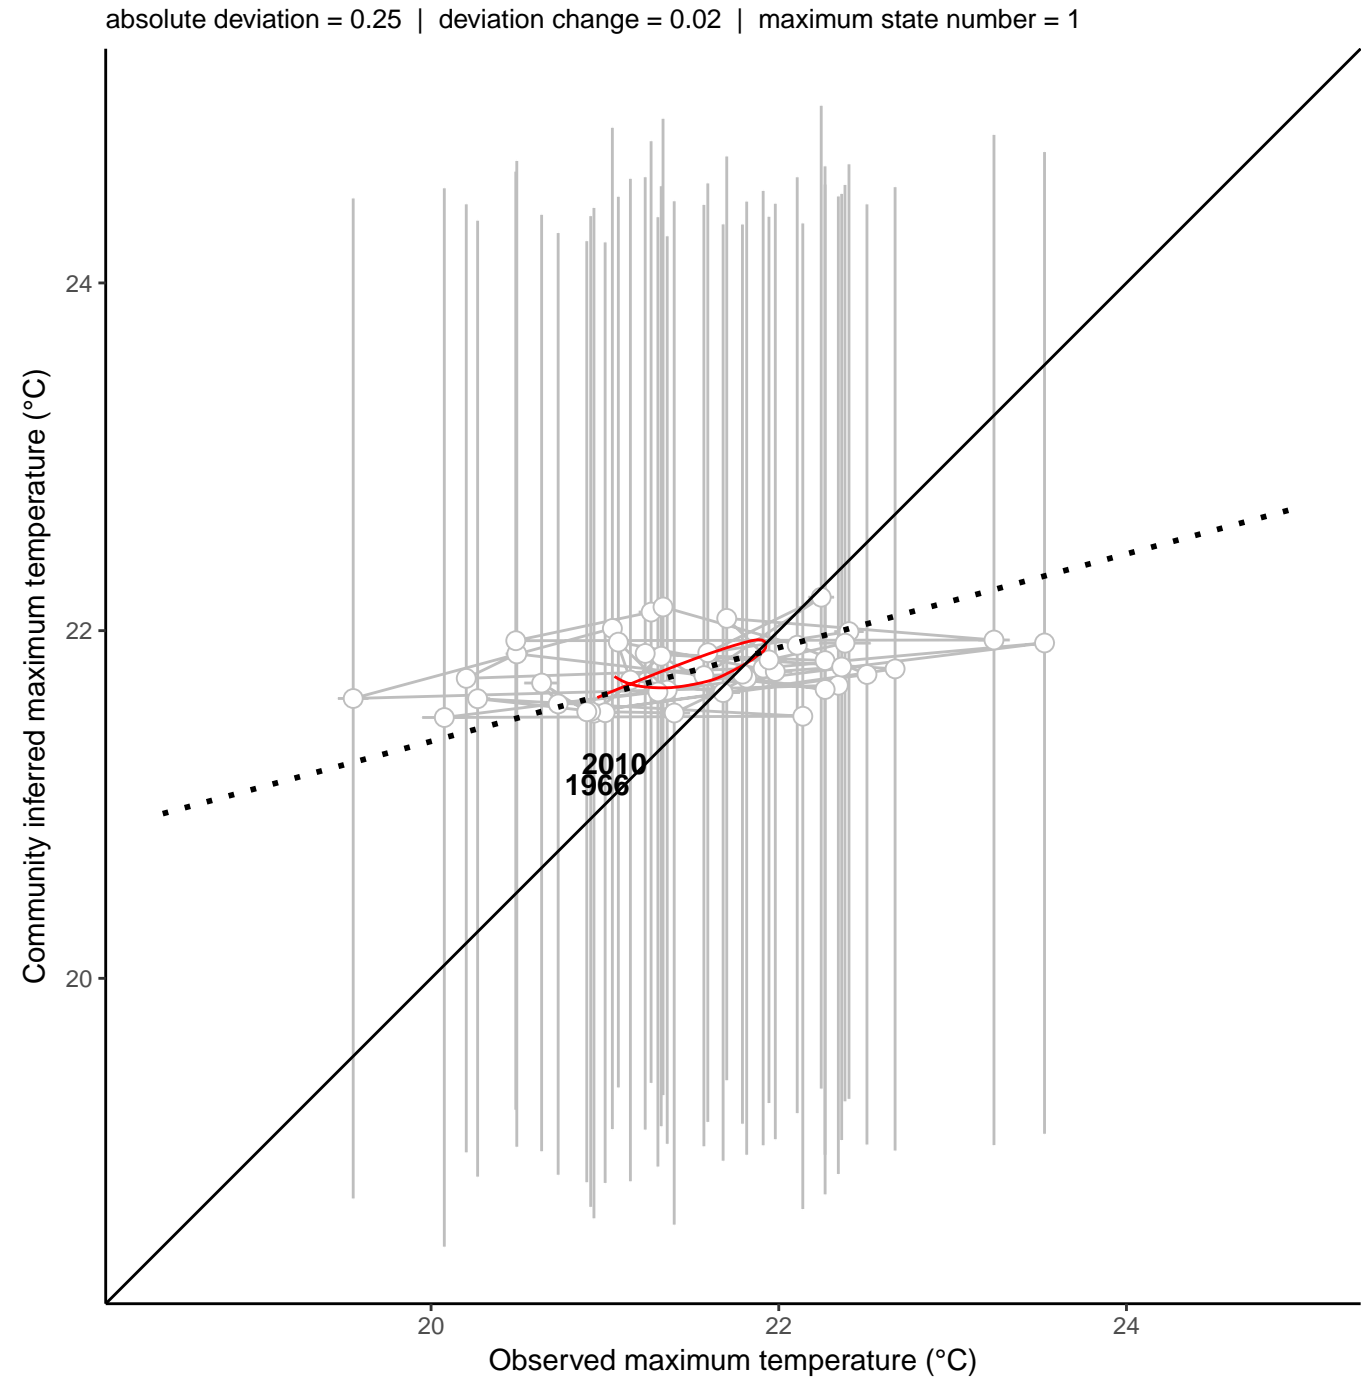



site : 840\_72\_36

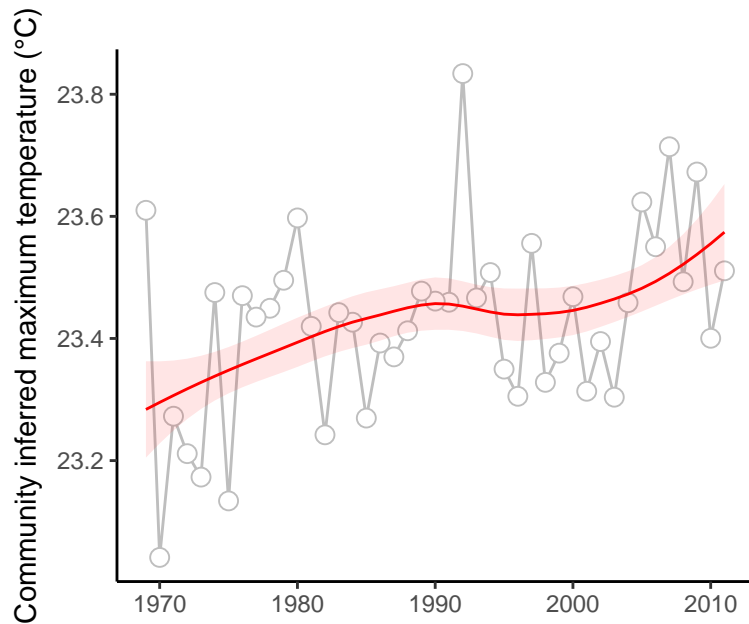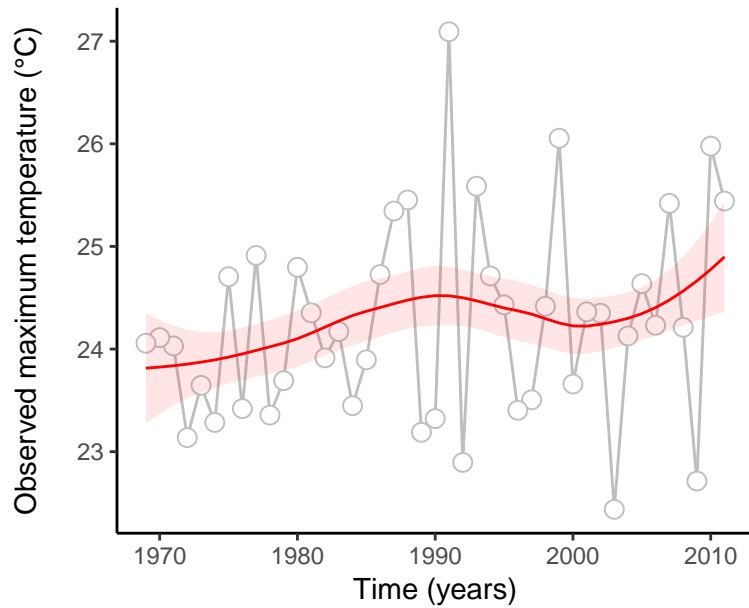

absolute deviation = 0.85 | deviation change = 0.79 | maximum state number = 1

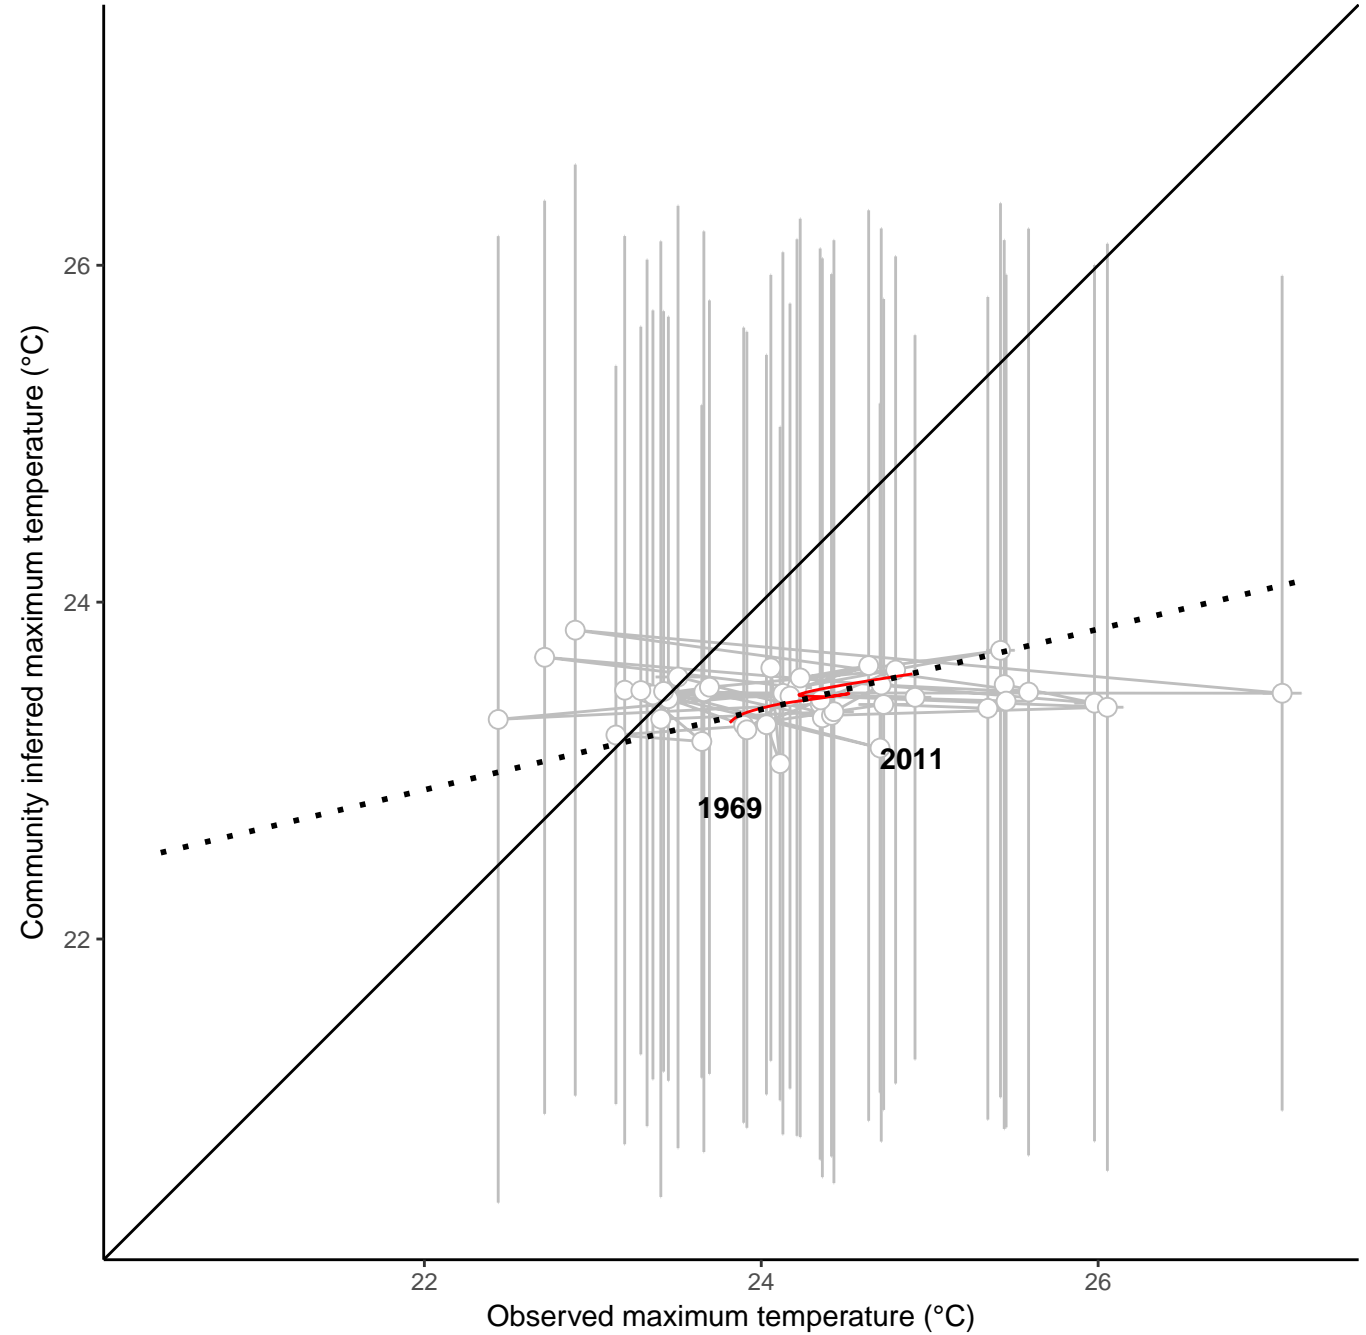

site : 840\_44\_19

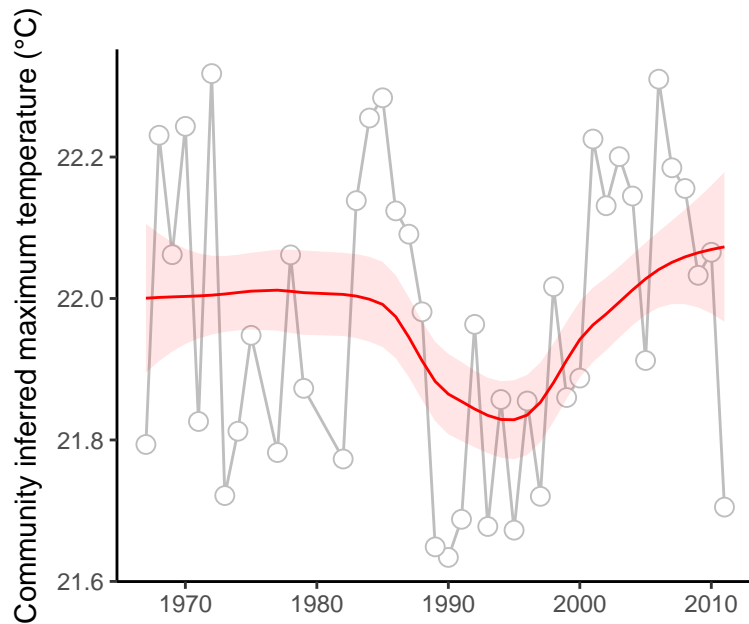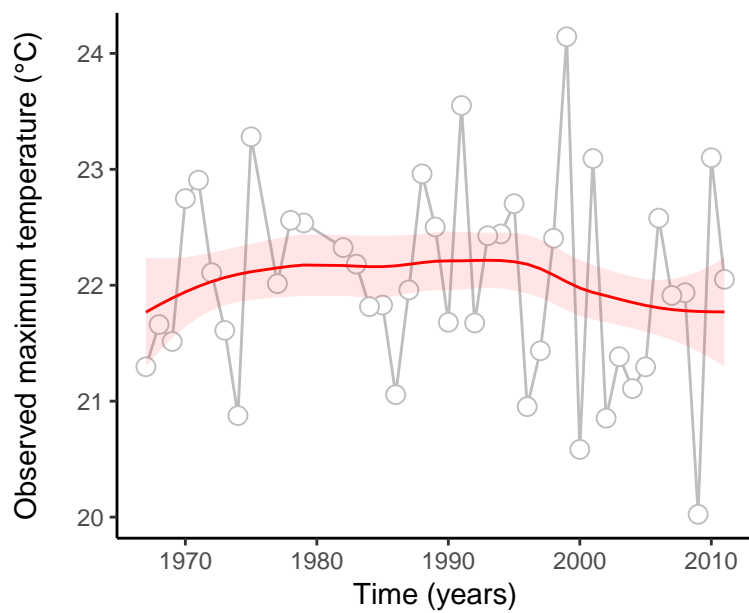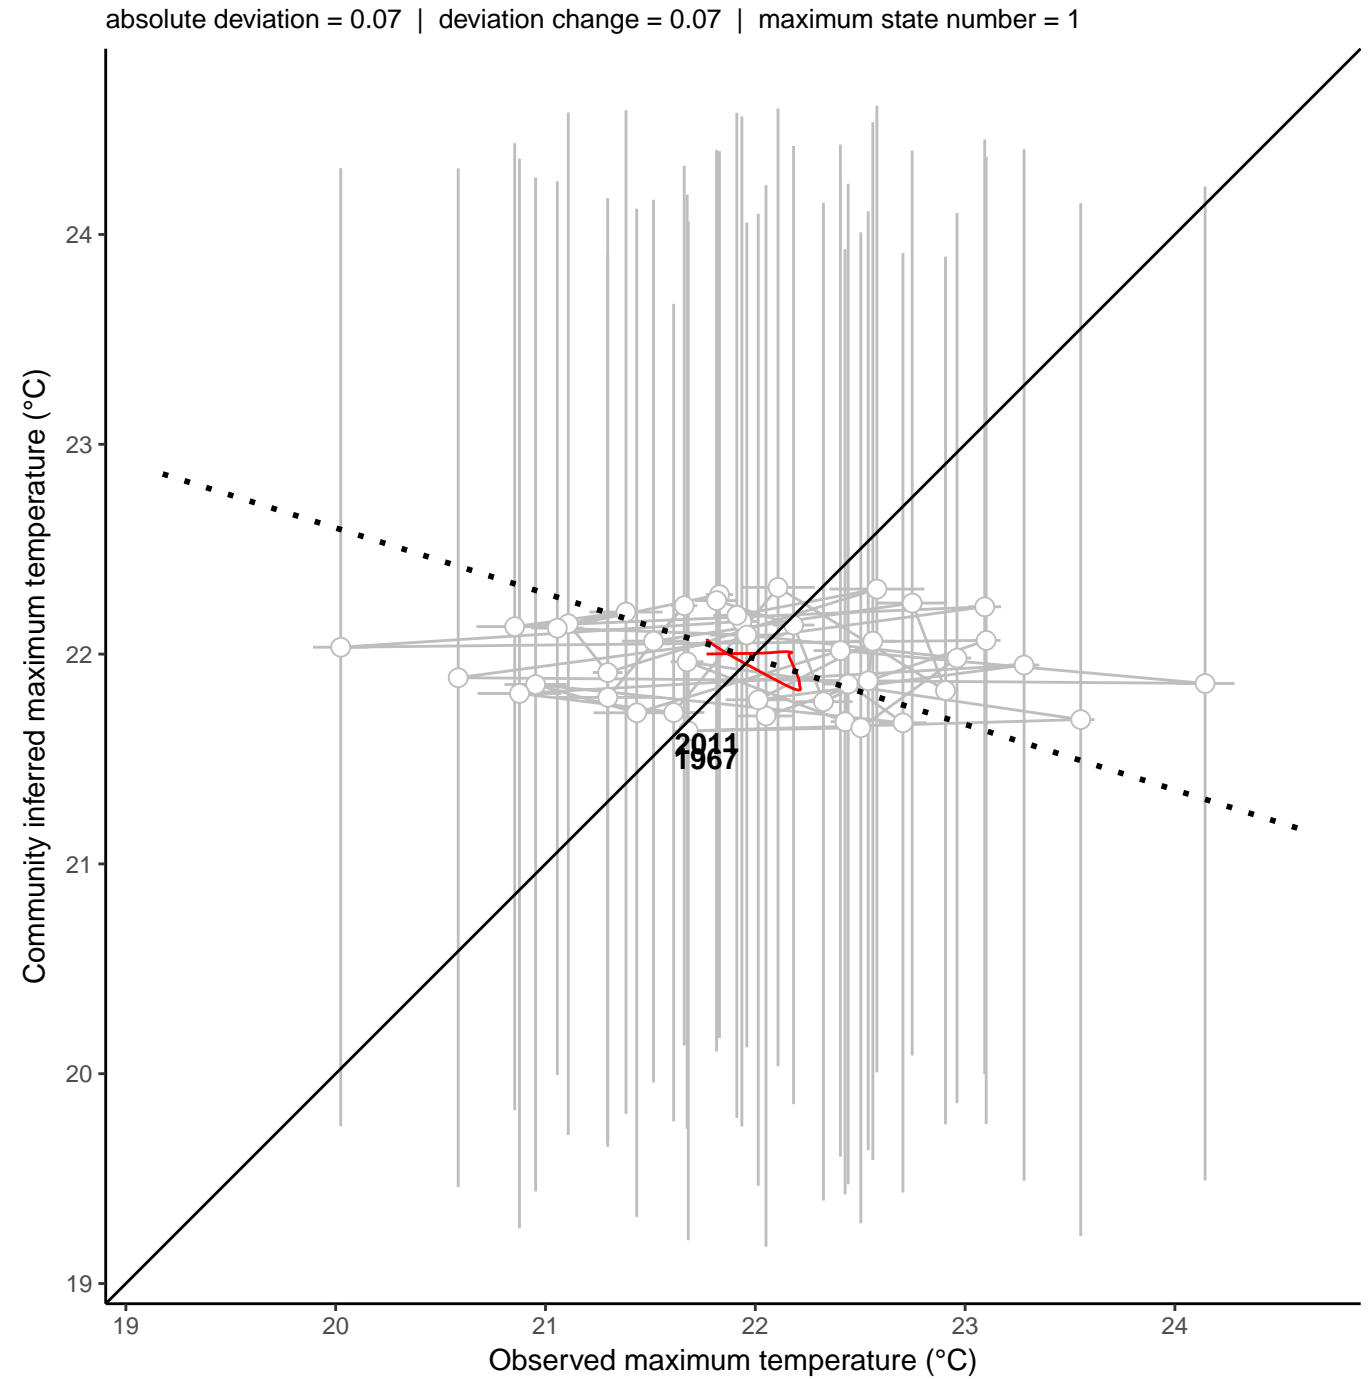

site : 840\_2\_34

absolute deviation = 4.79 | deviation change = 0.74 | maximum state number = 1

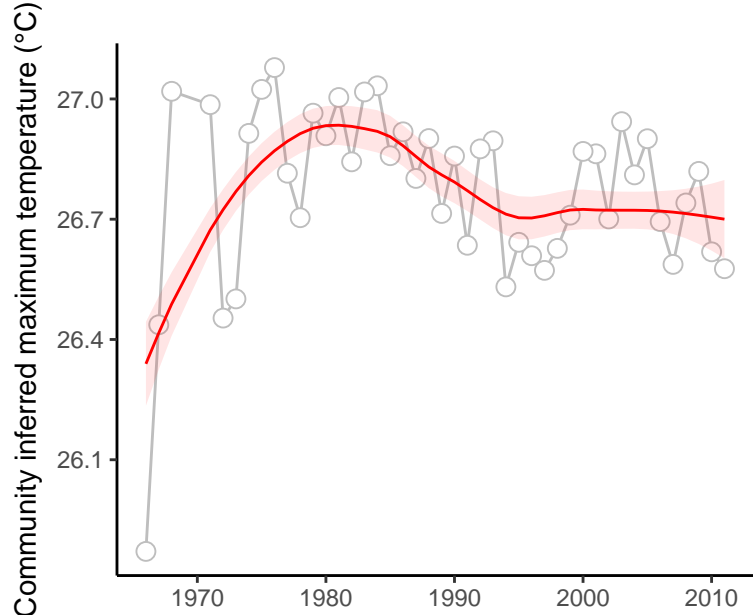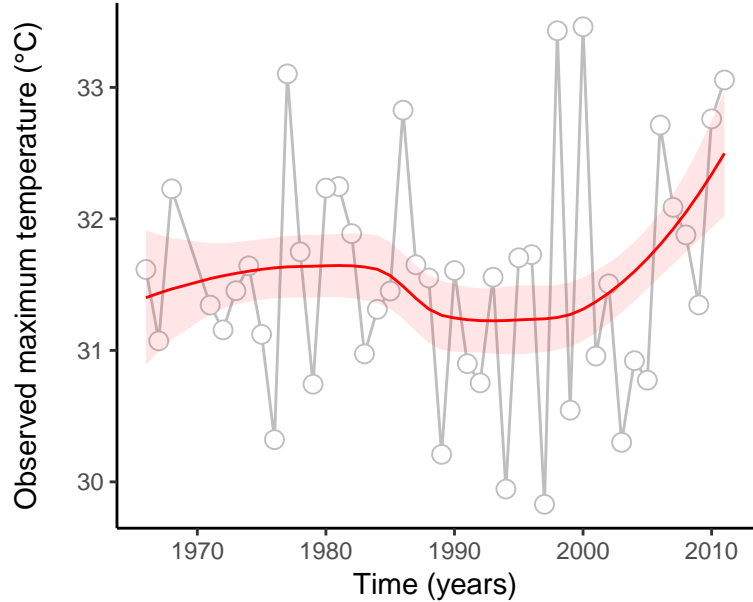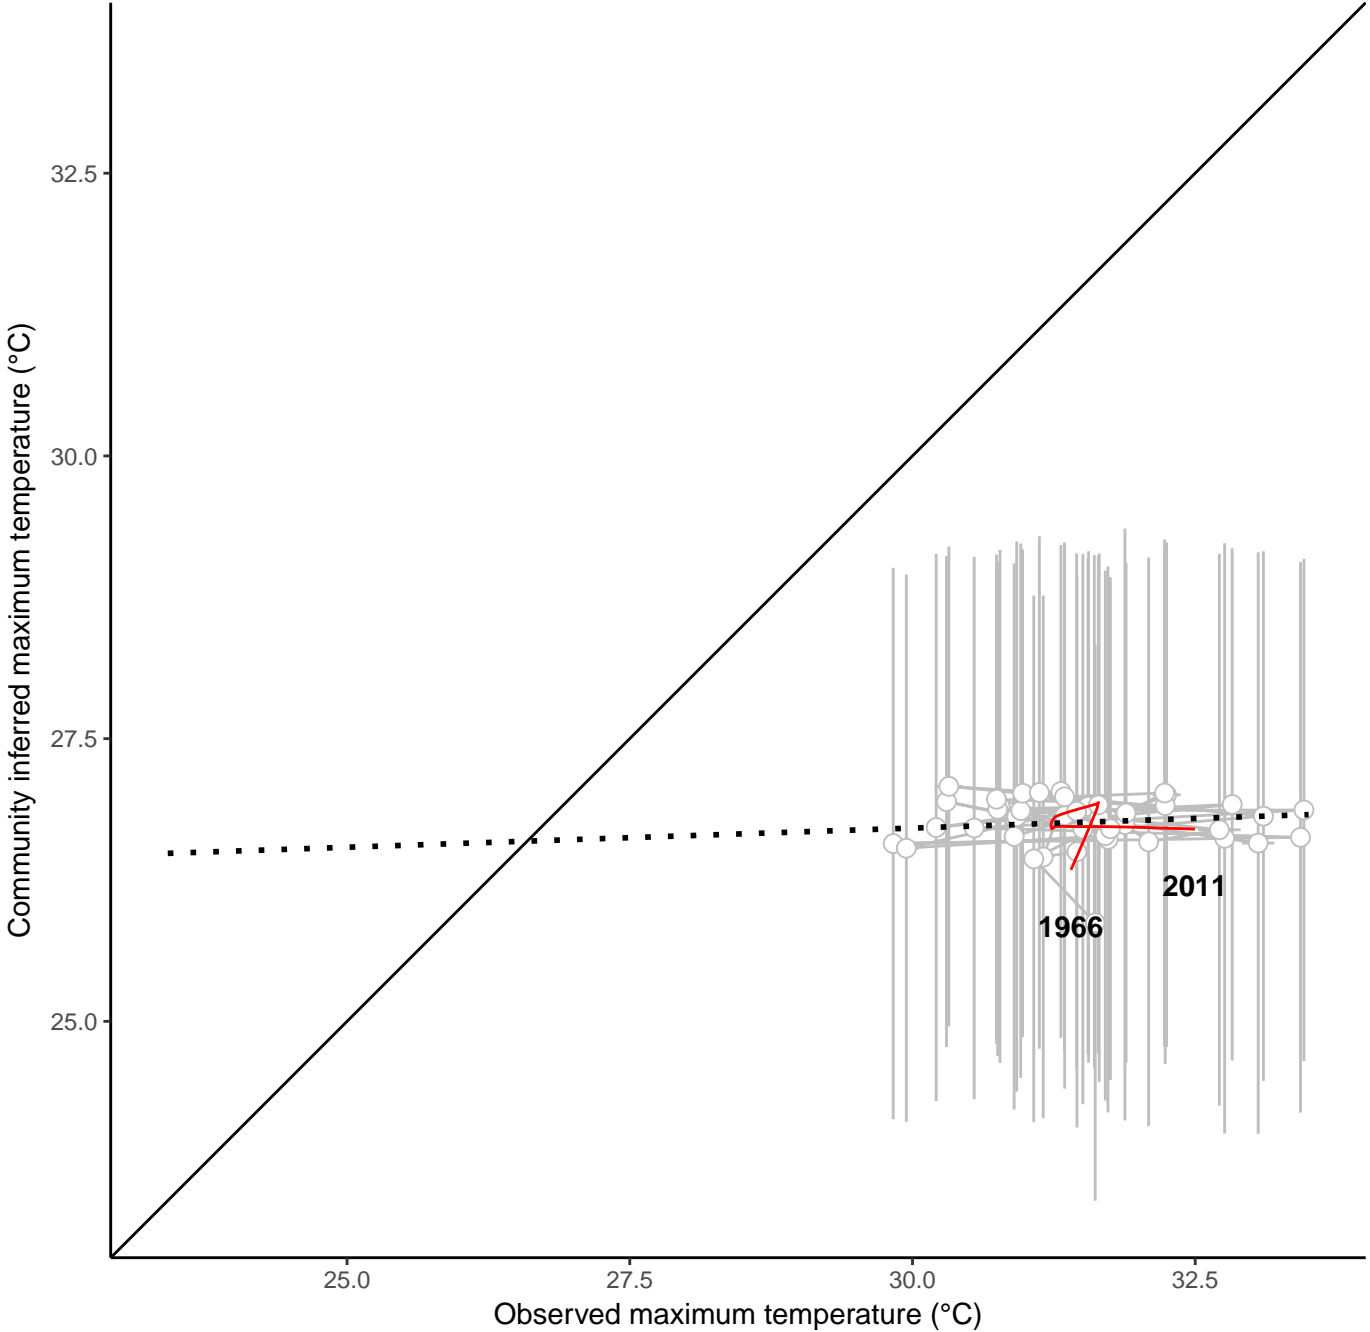

site : 840\_72\_66

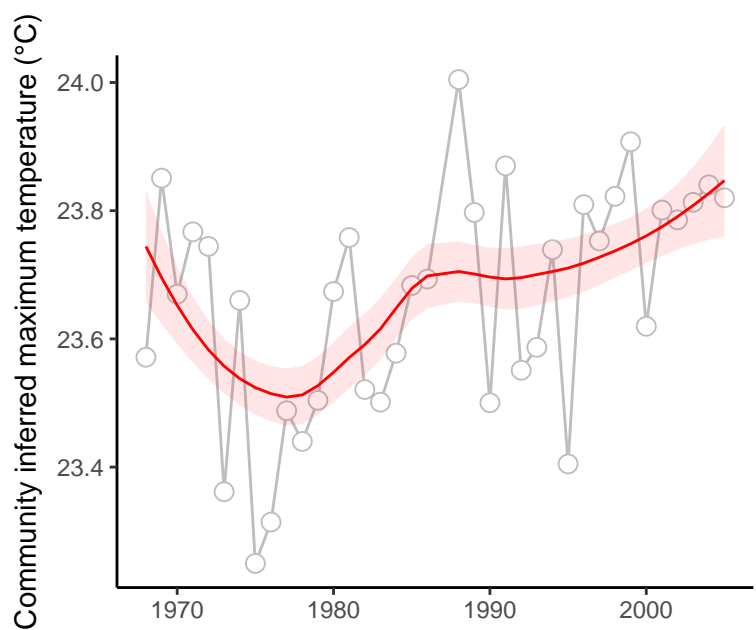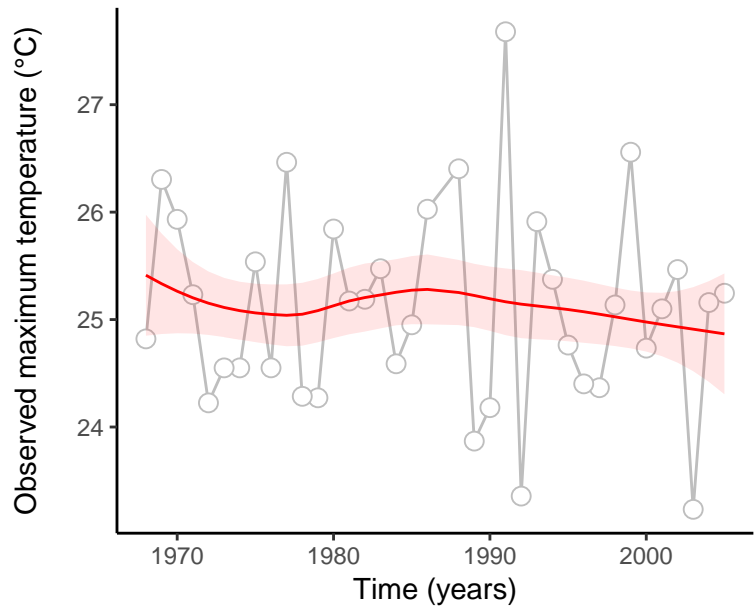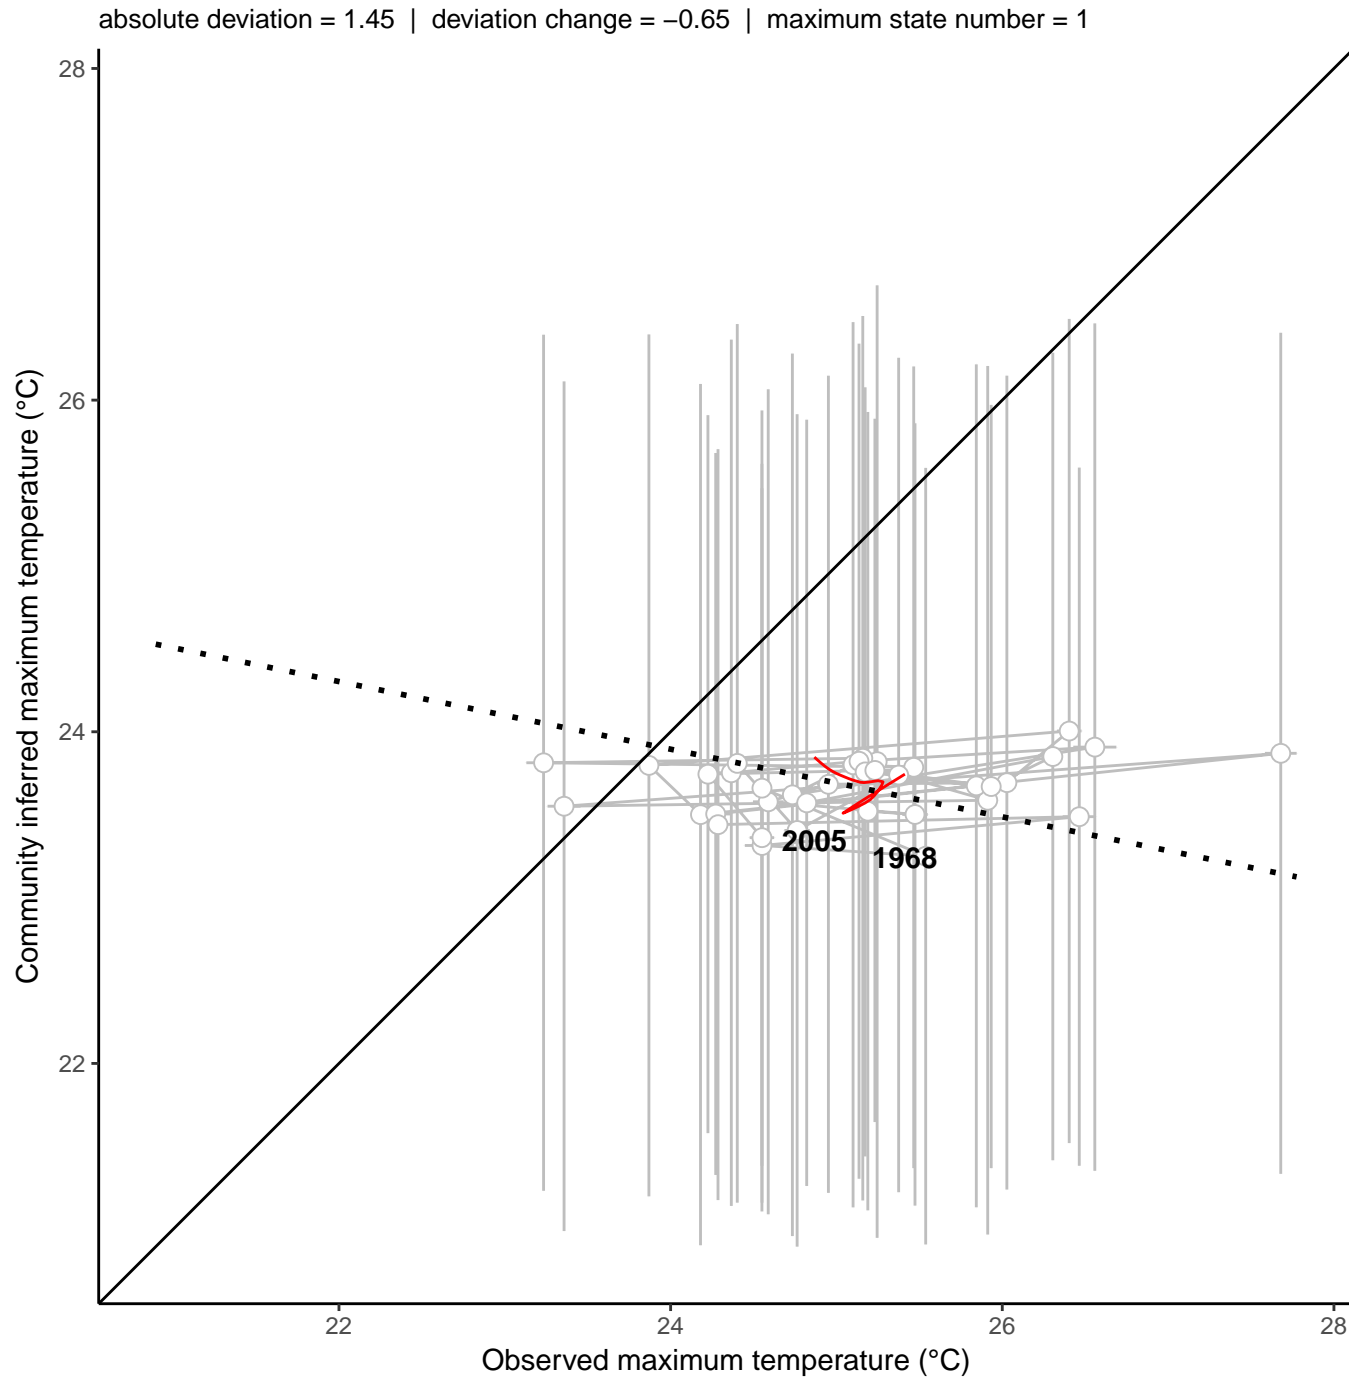

site : 840\_61\_64

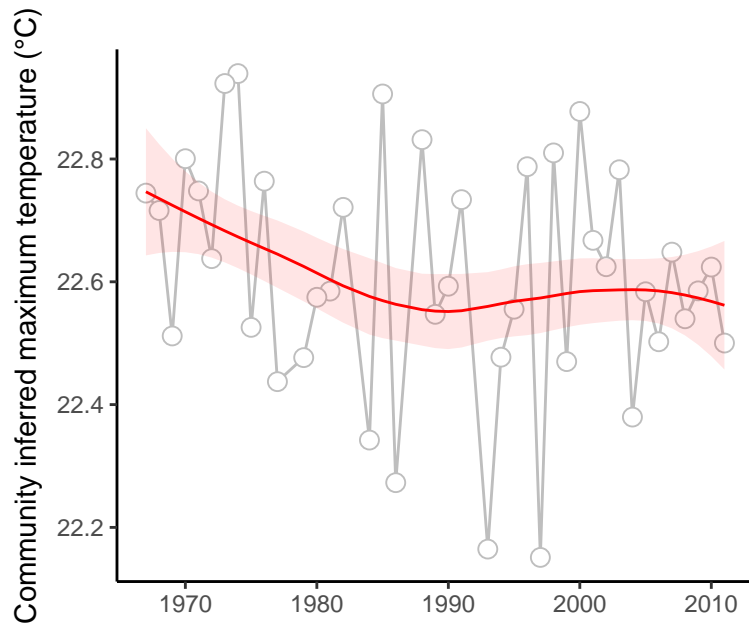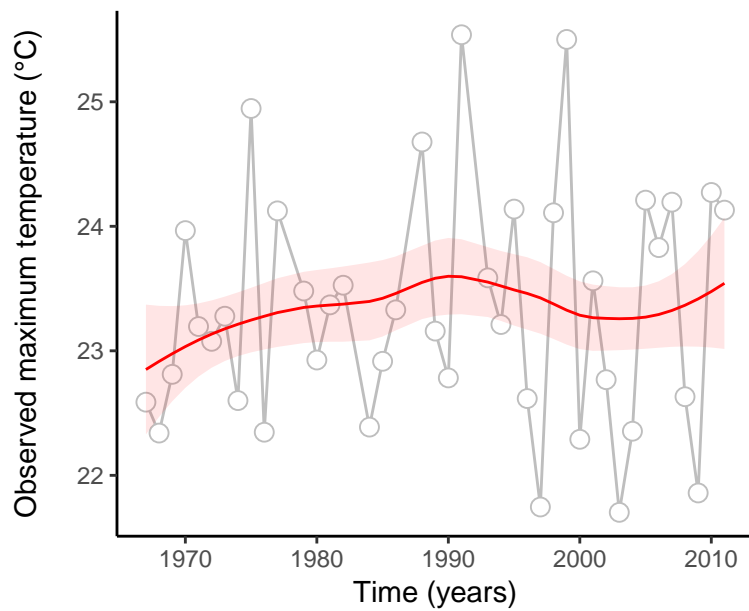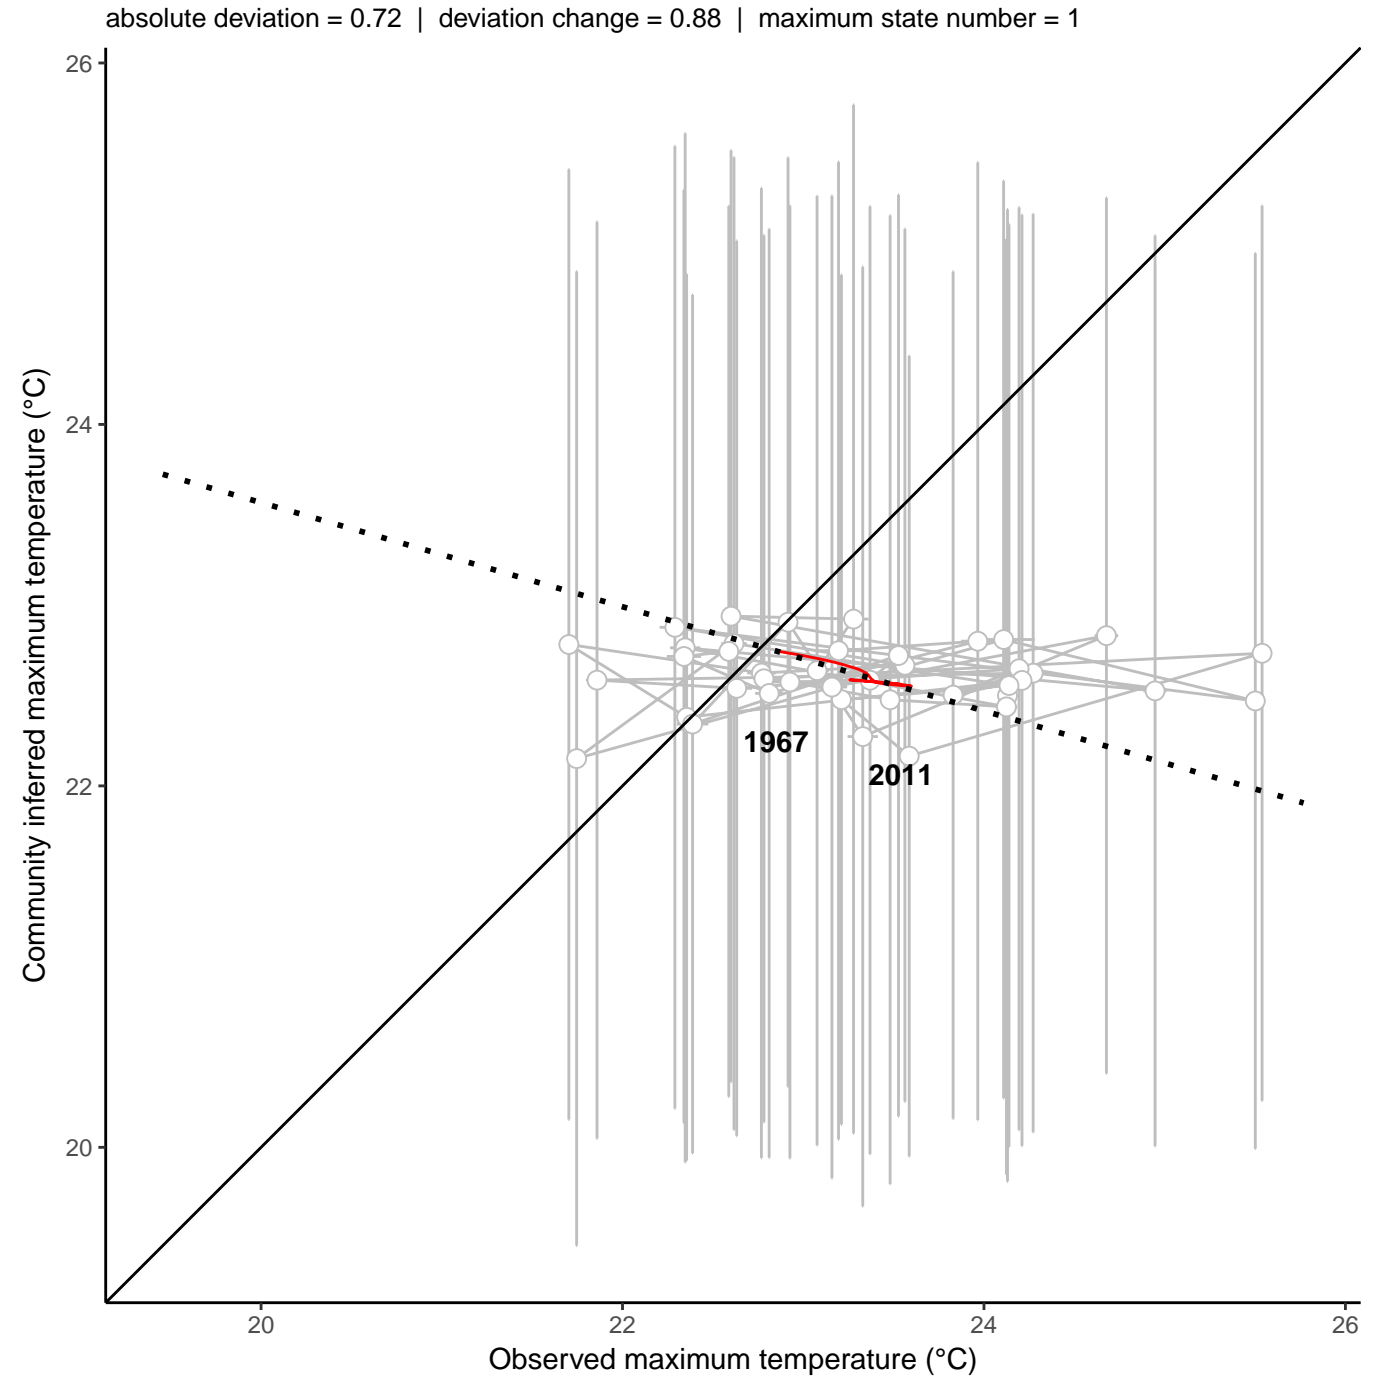

site : 840\_47\_15

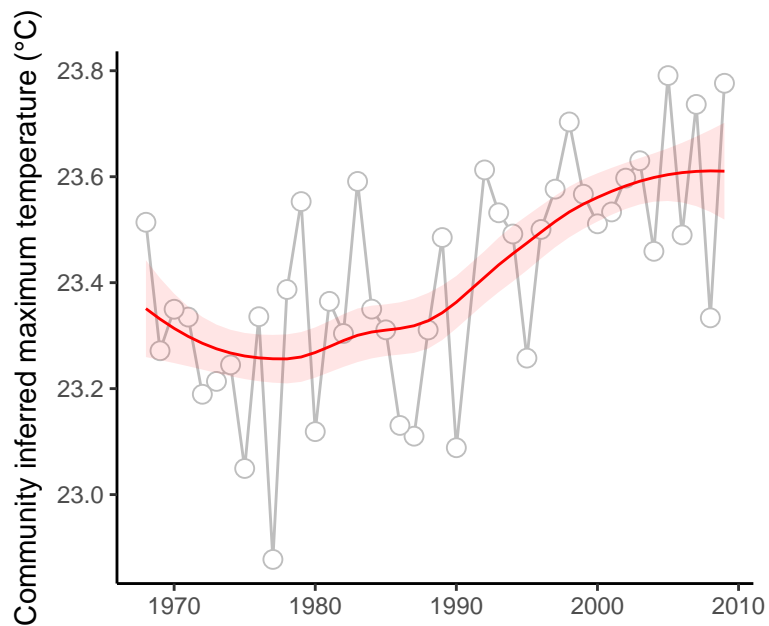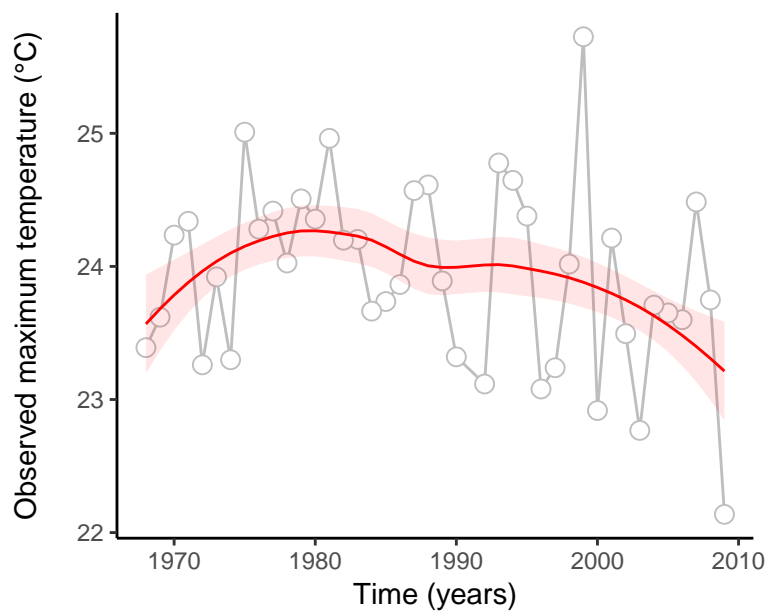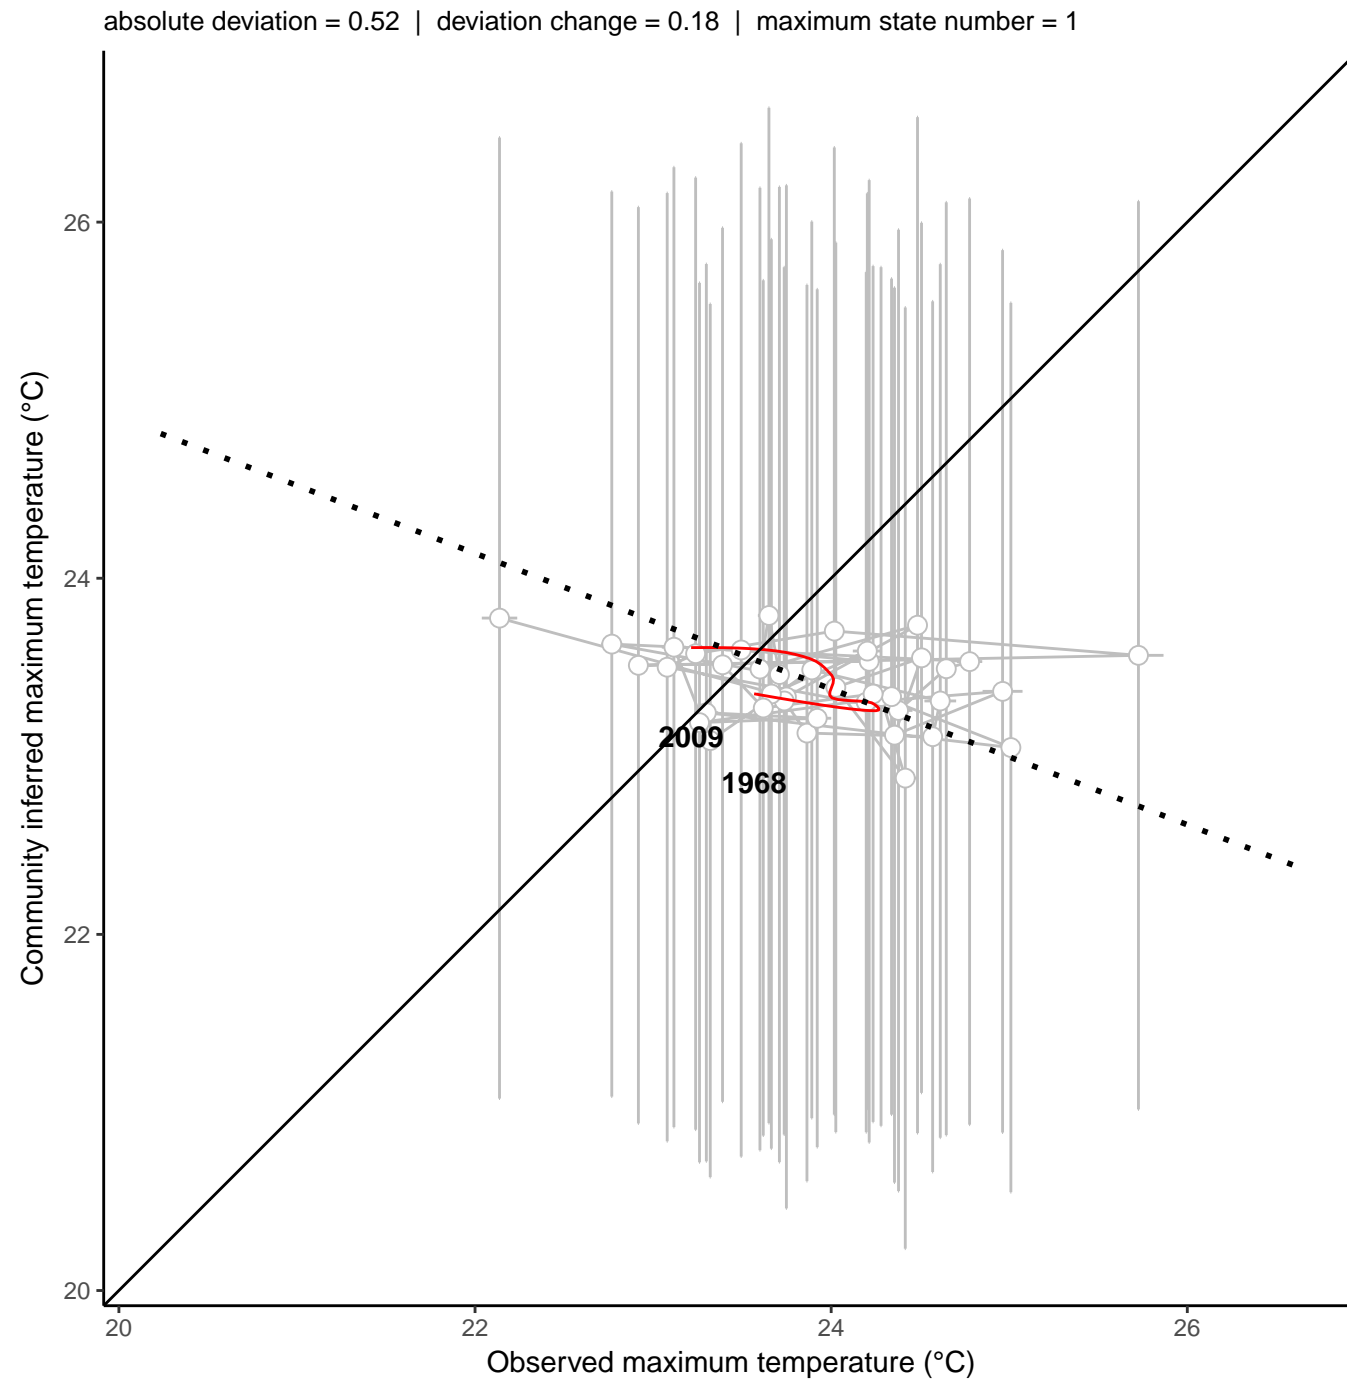

site : 840\_47\_22

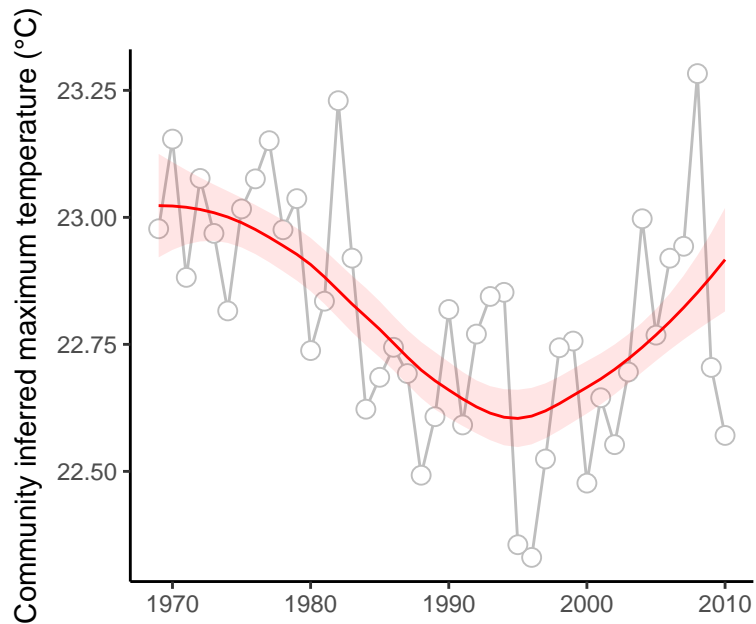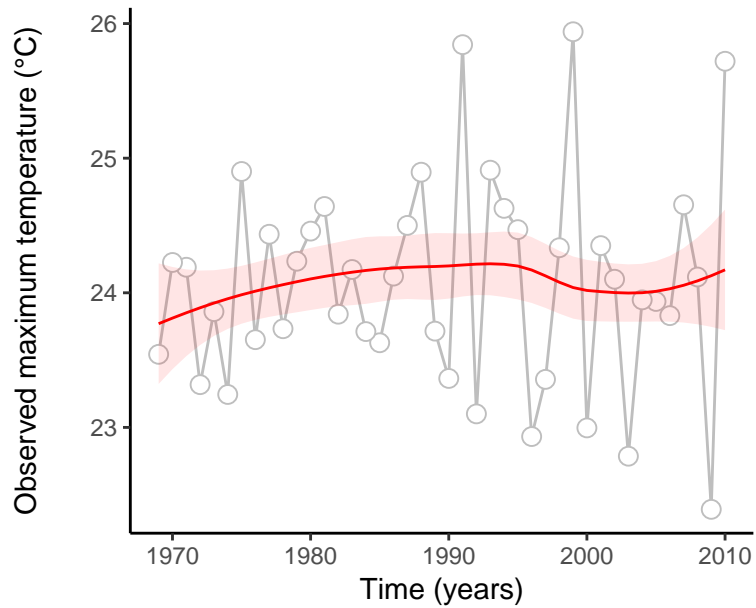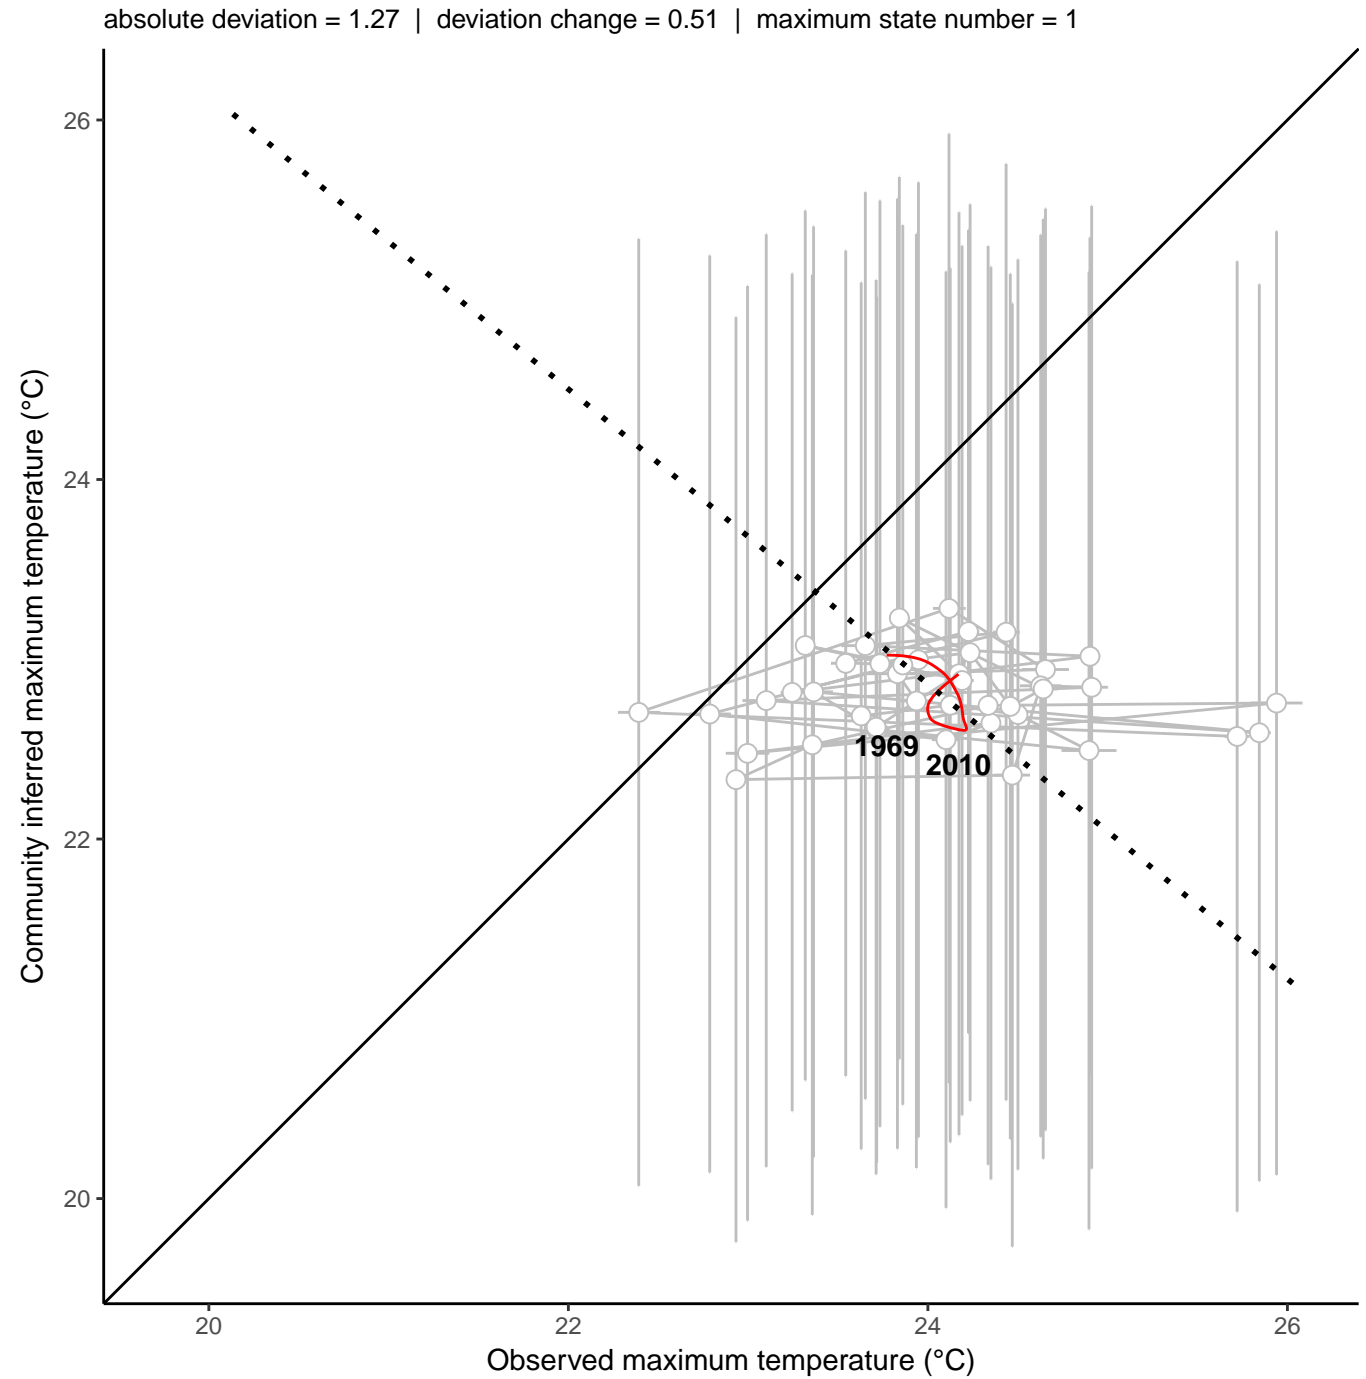

site : 840\_61\_44

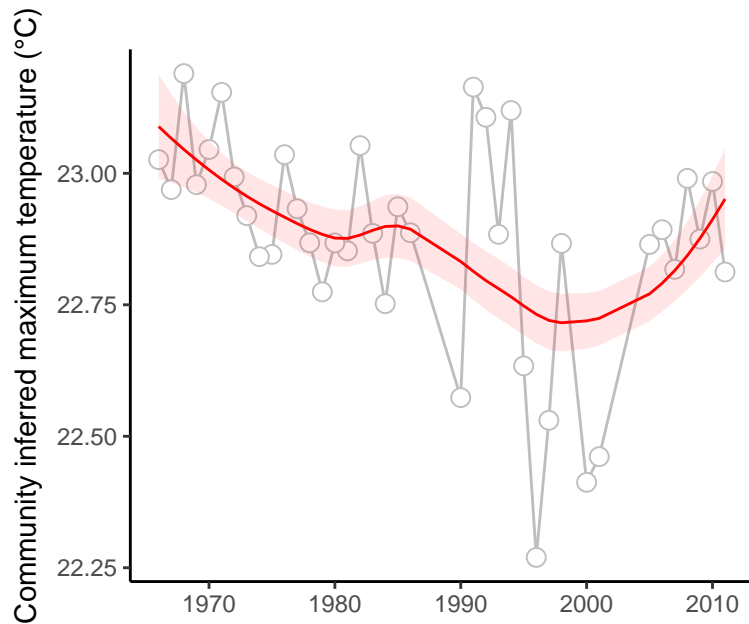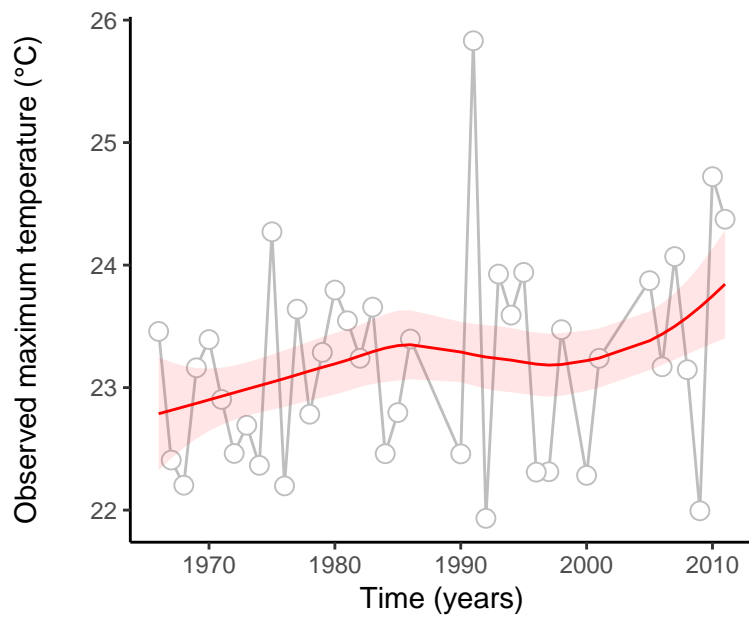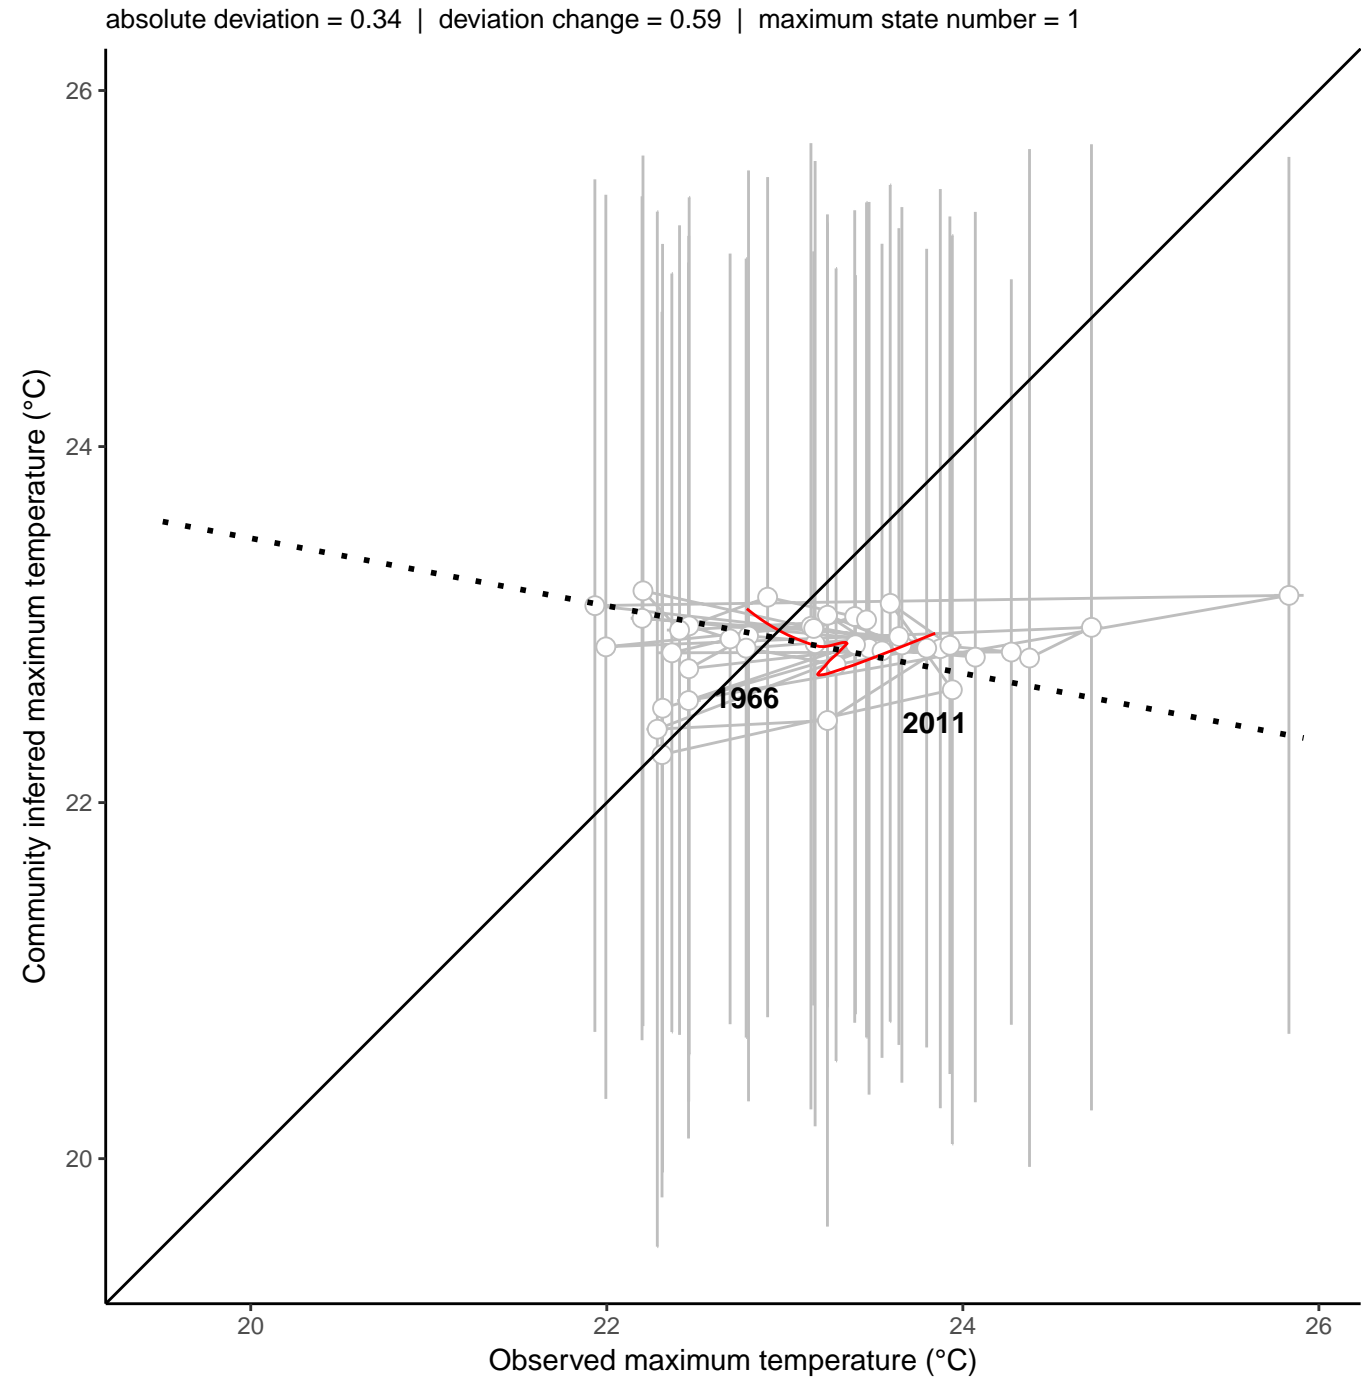



site : 840\_18\_3

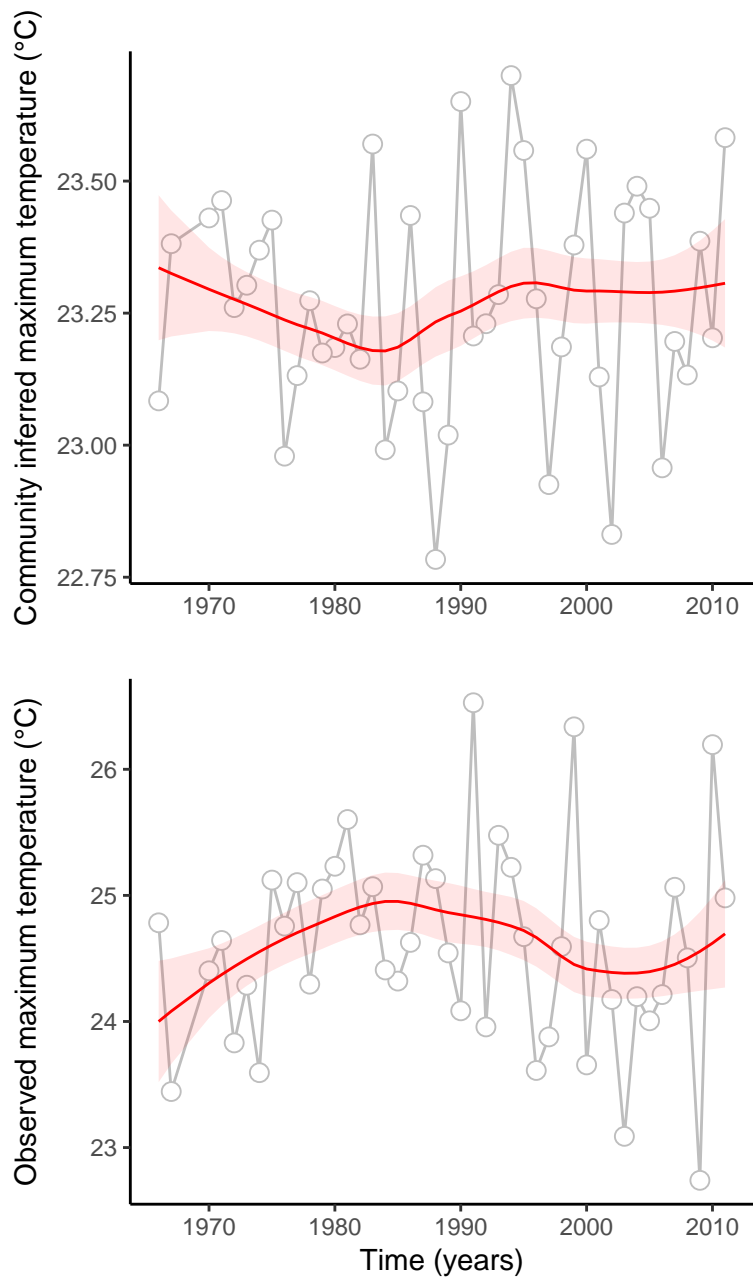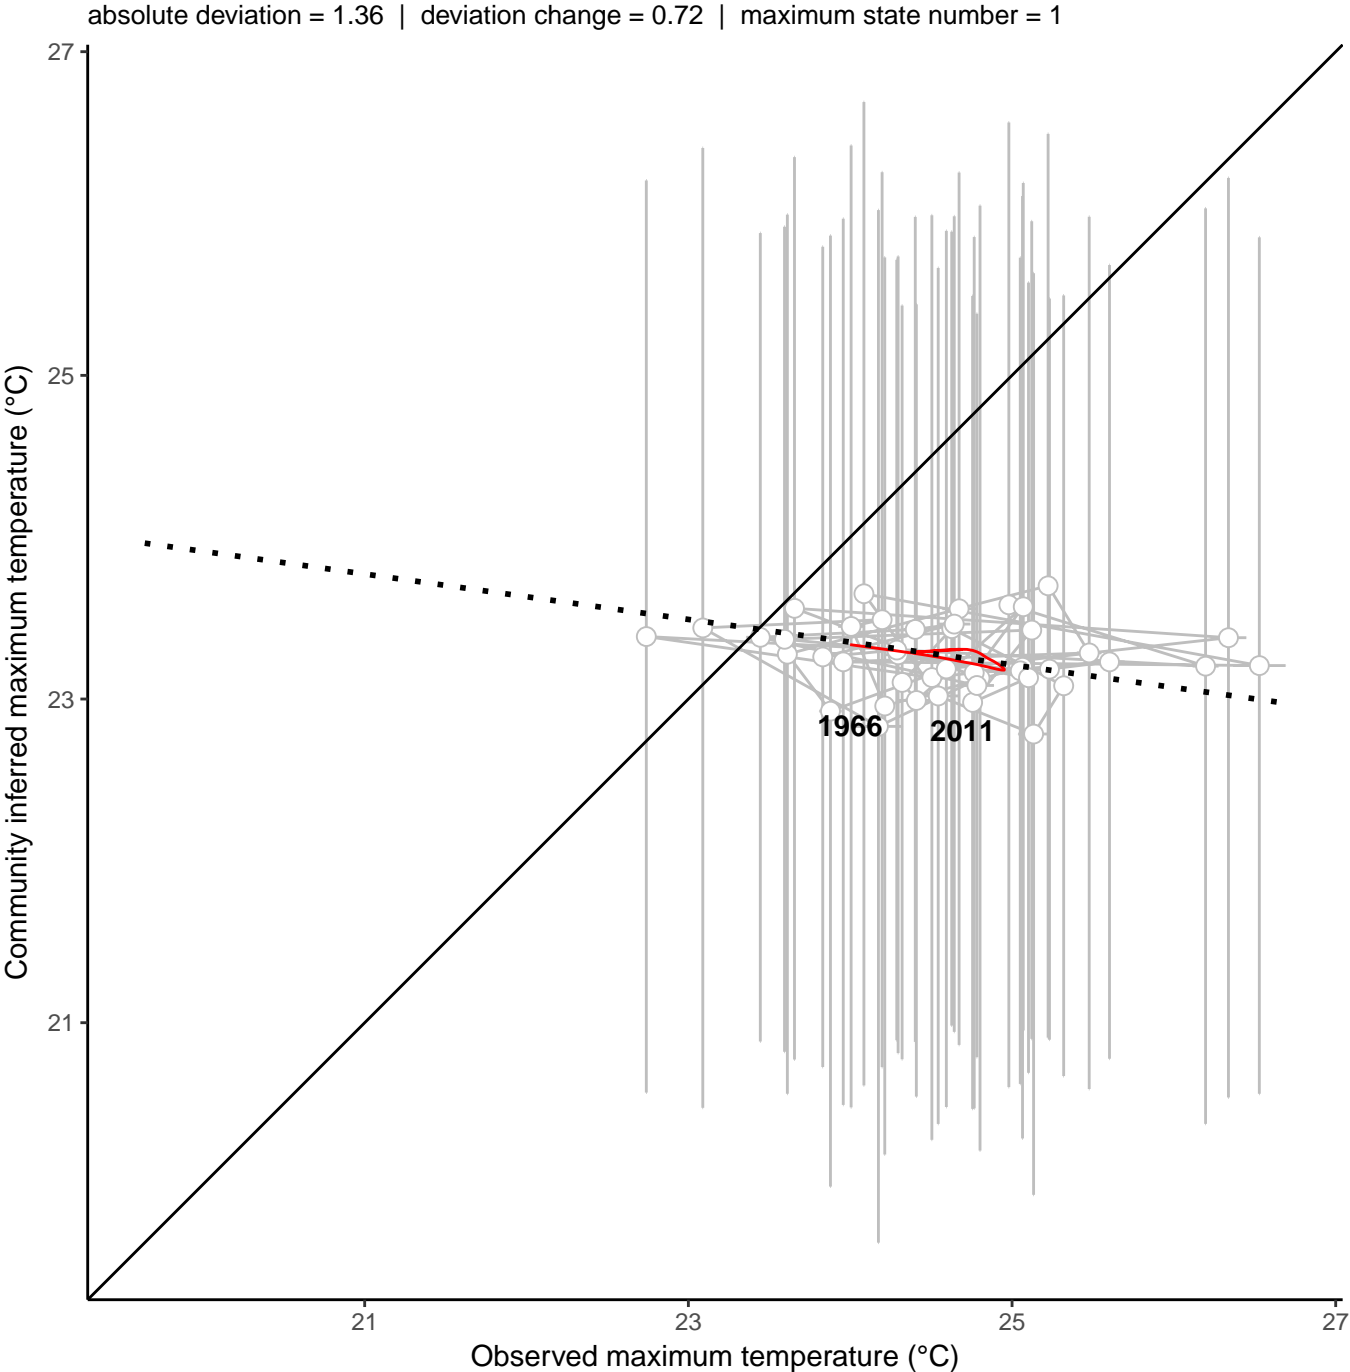

site : 840\_38\_33

absolute deviation = 3.89 | deviation change = 1.16 | maximum state number = 1

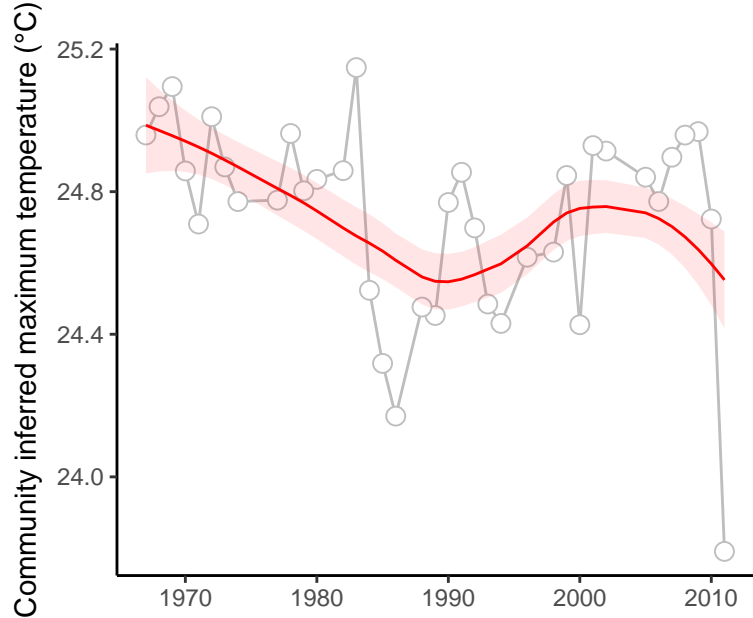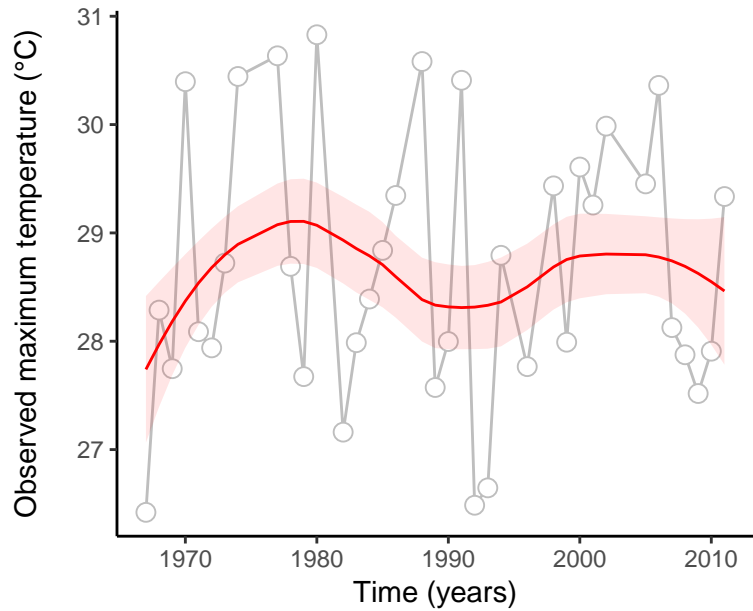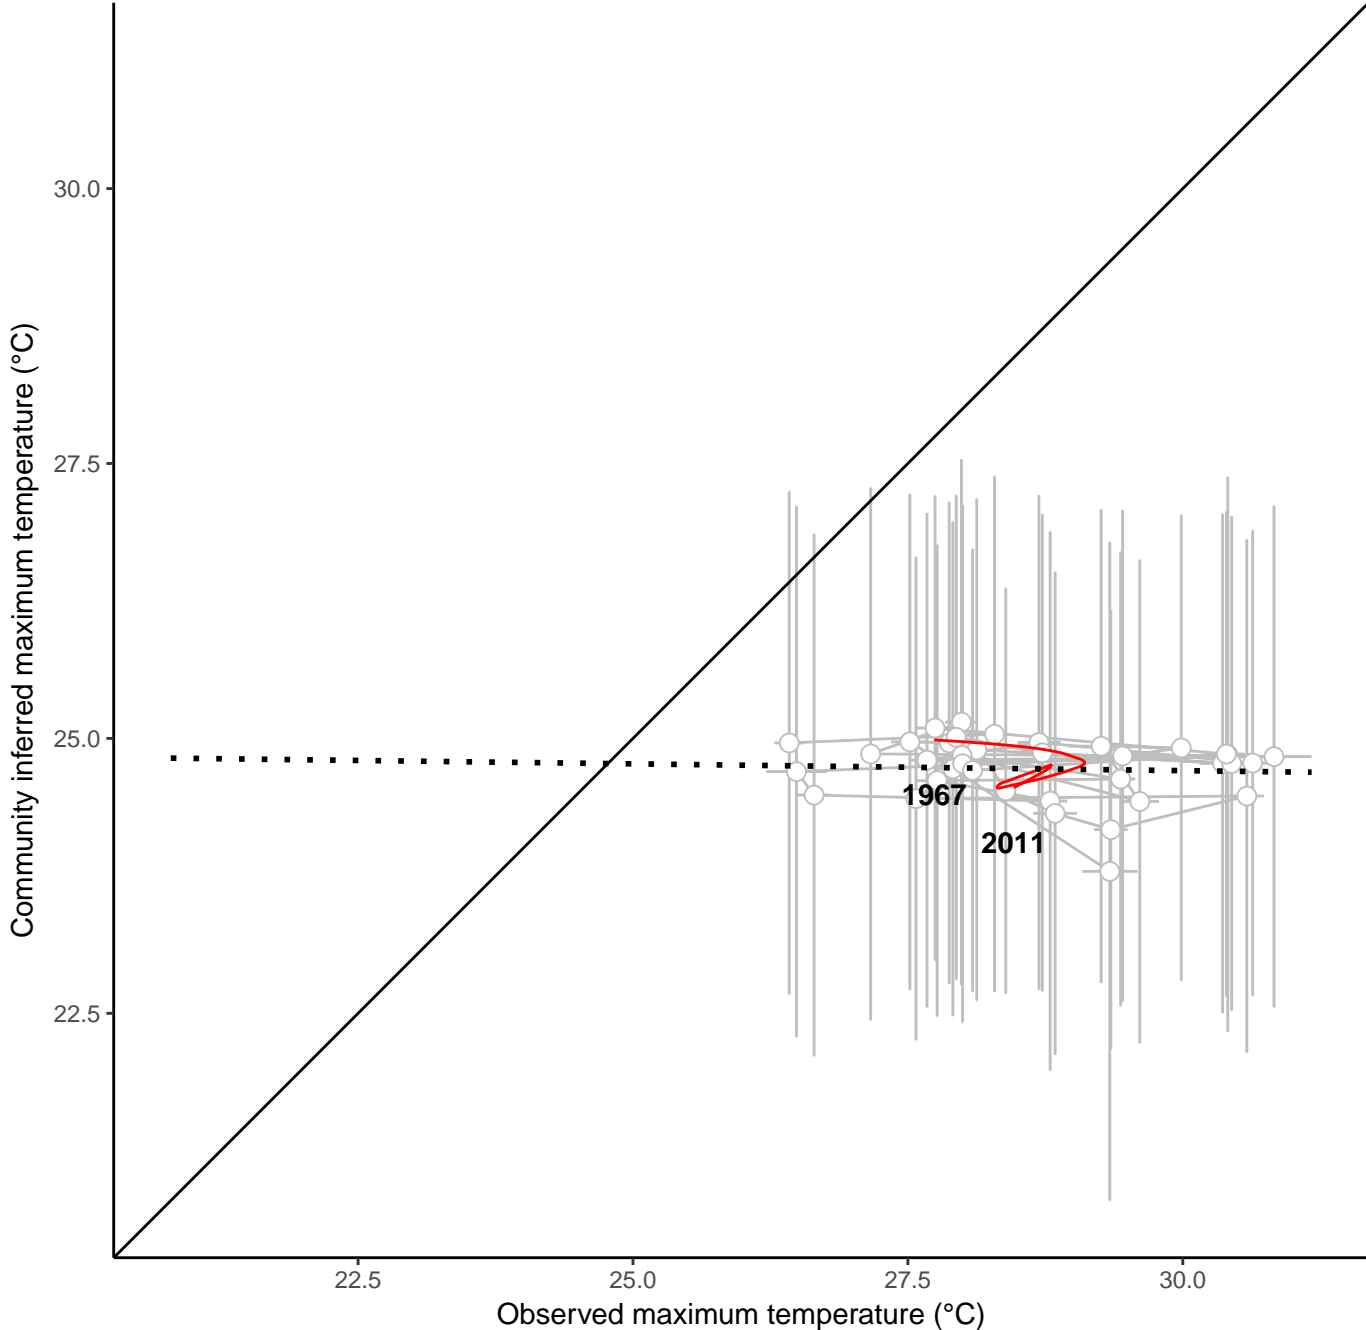

site : 840\_50\_28

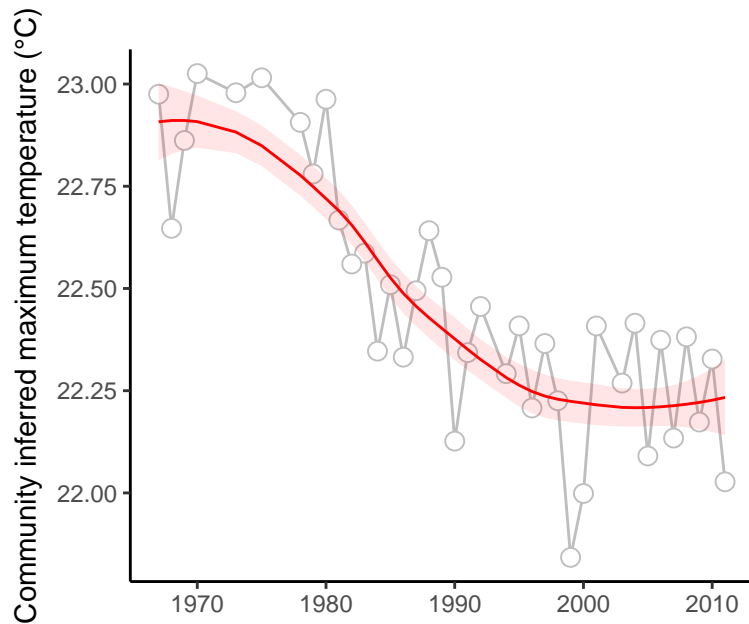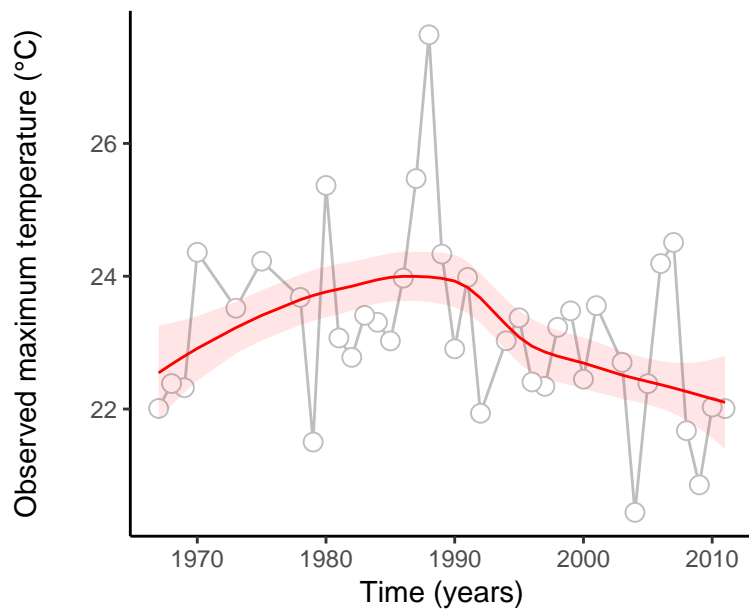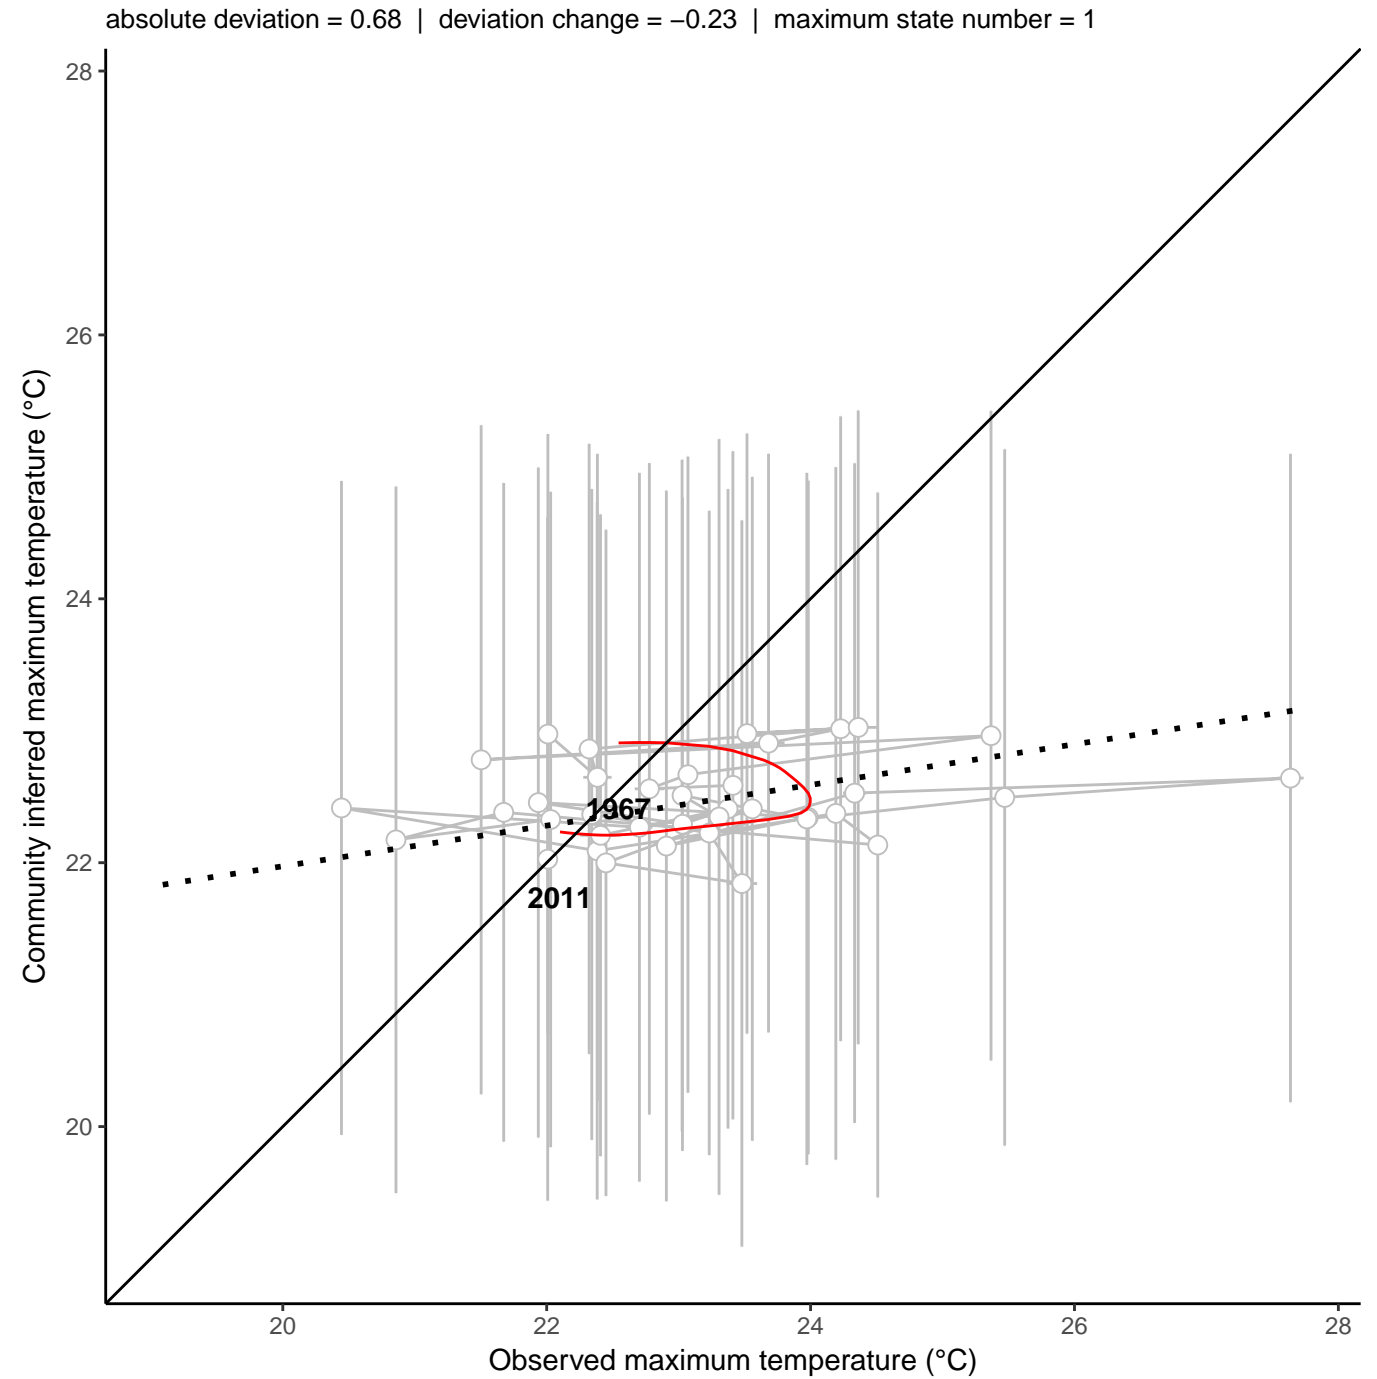

site : 840\_61\_69

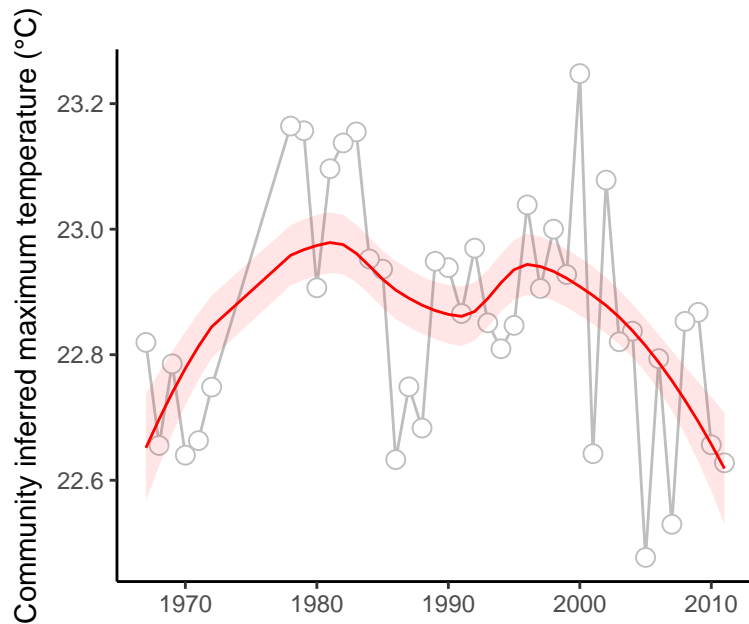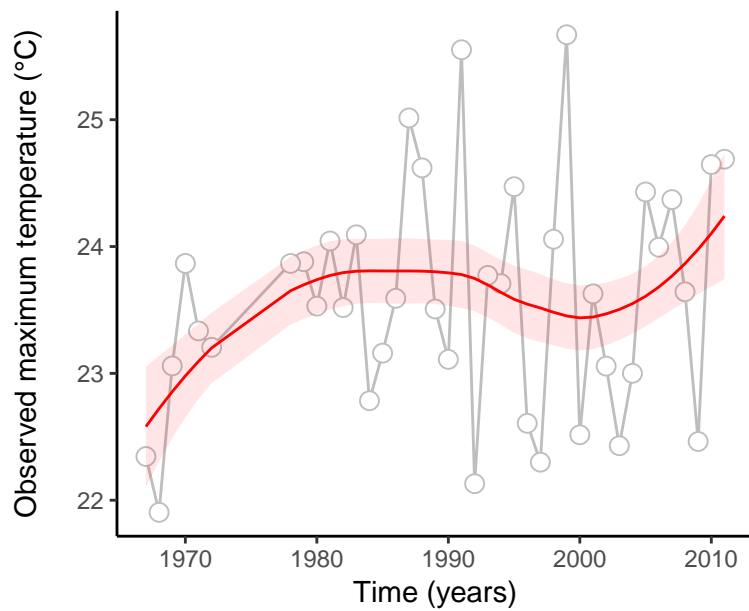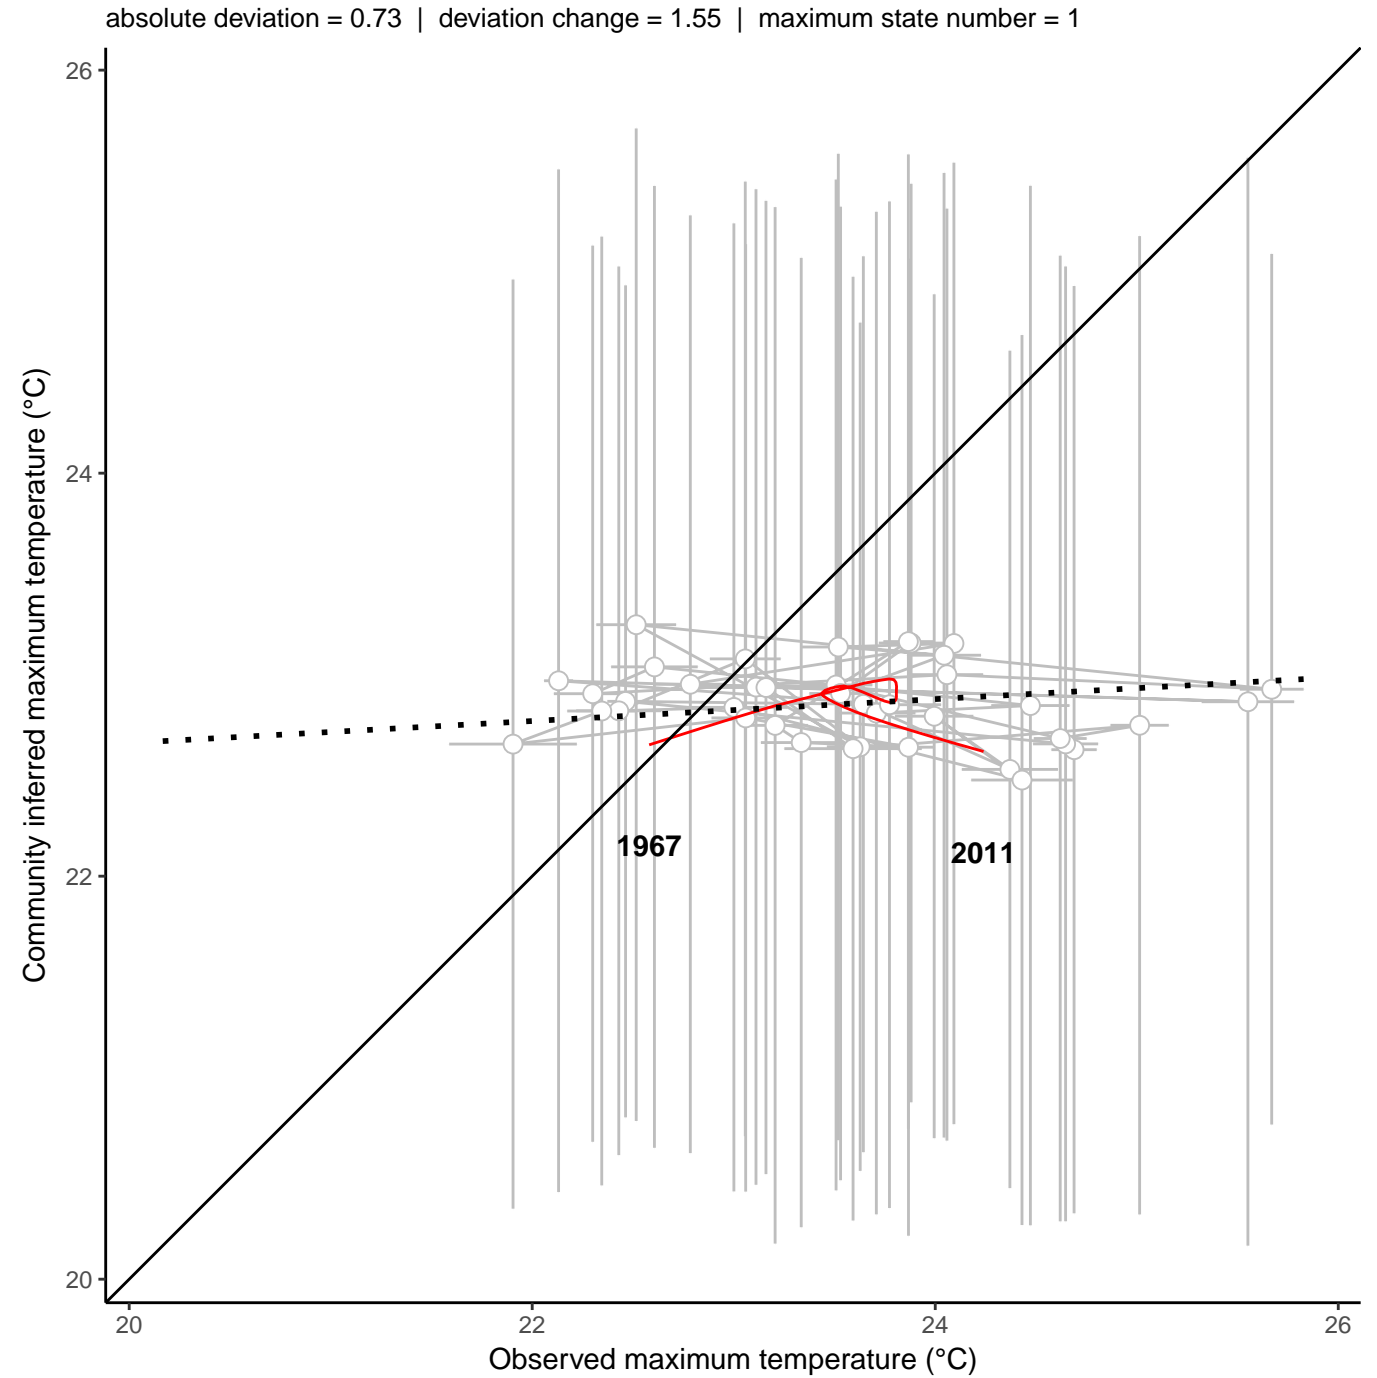

site : 840\_14\_83

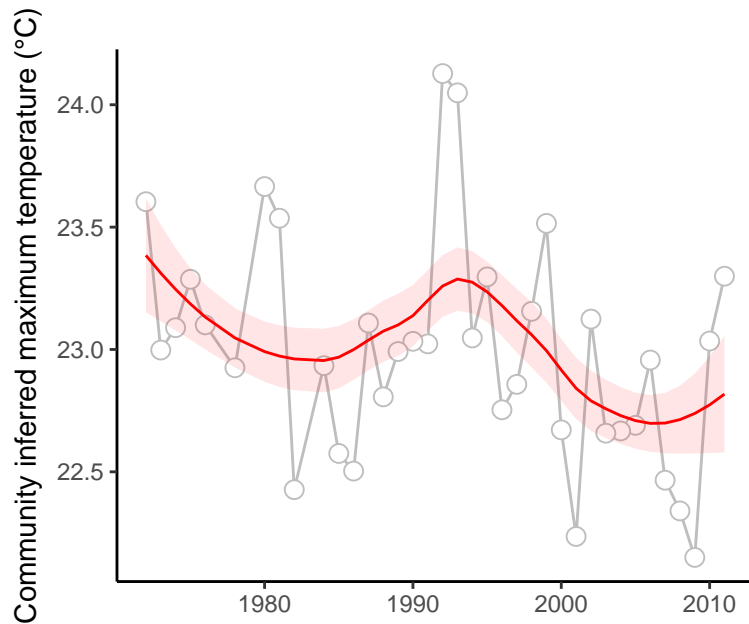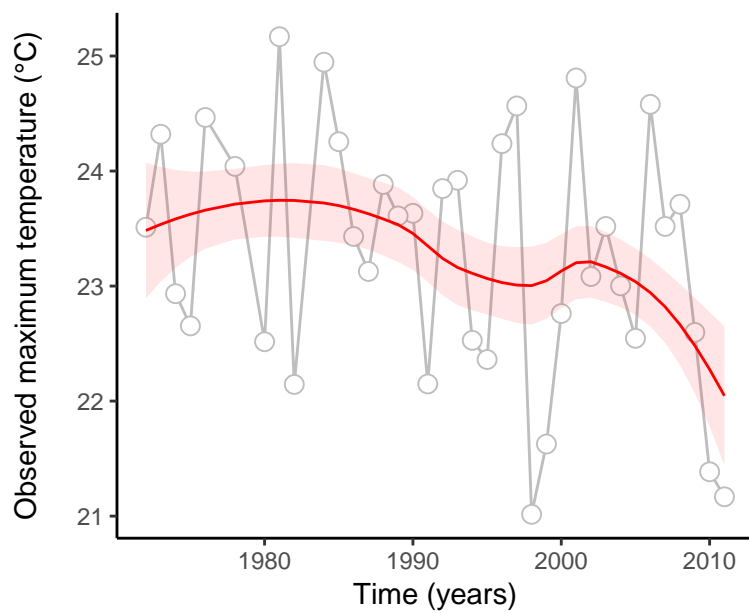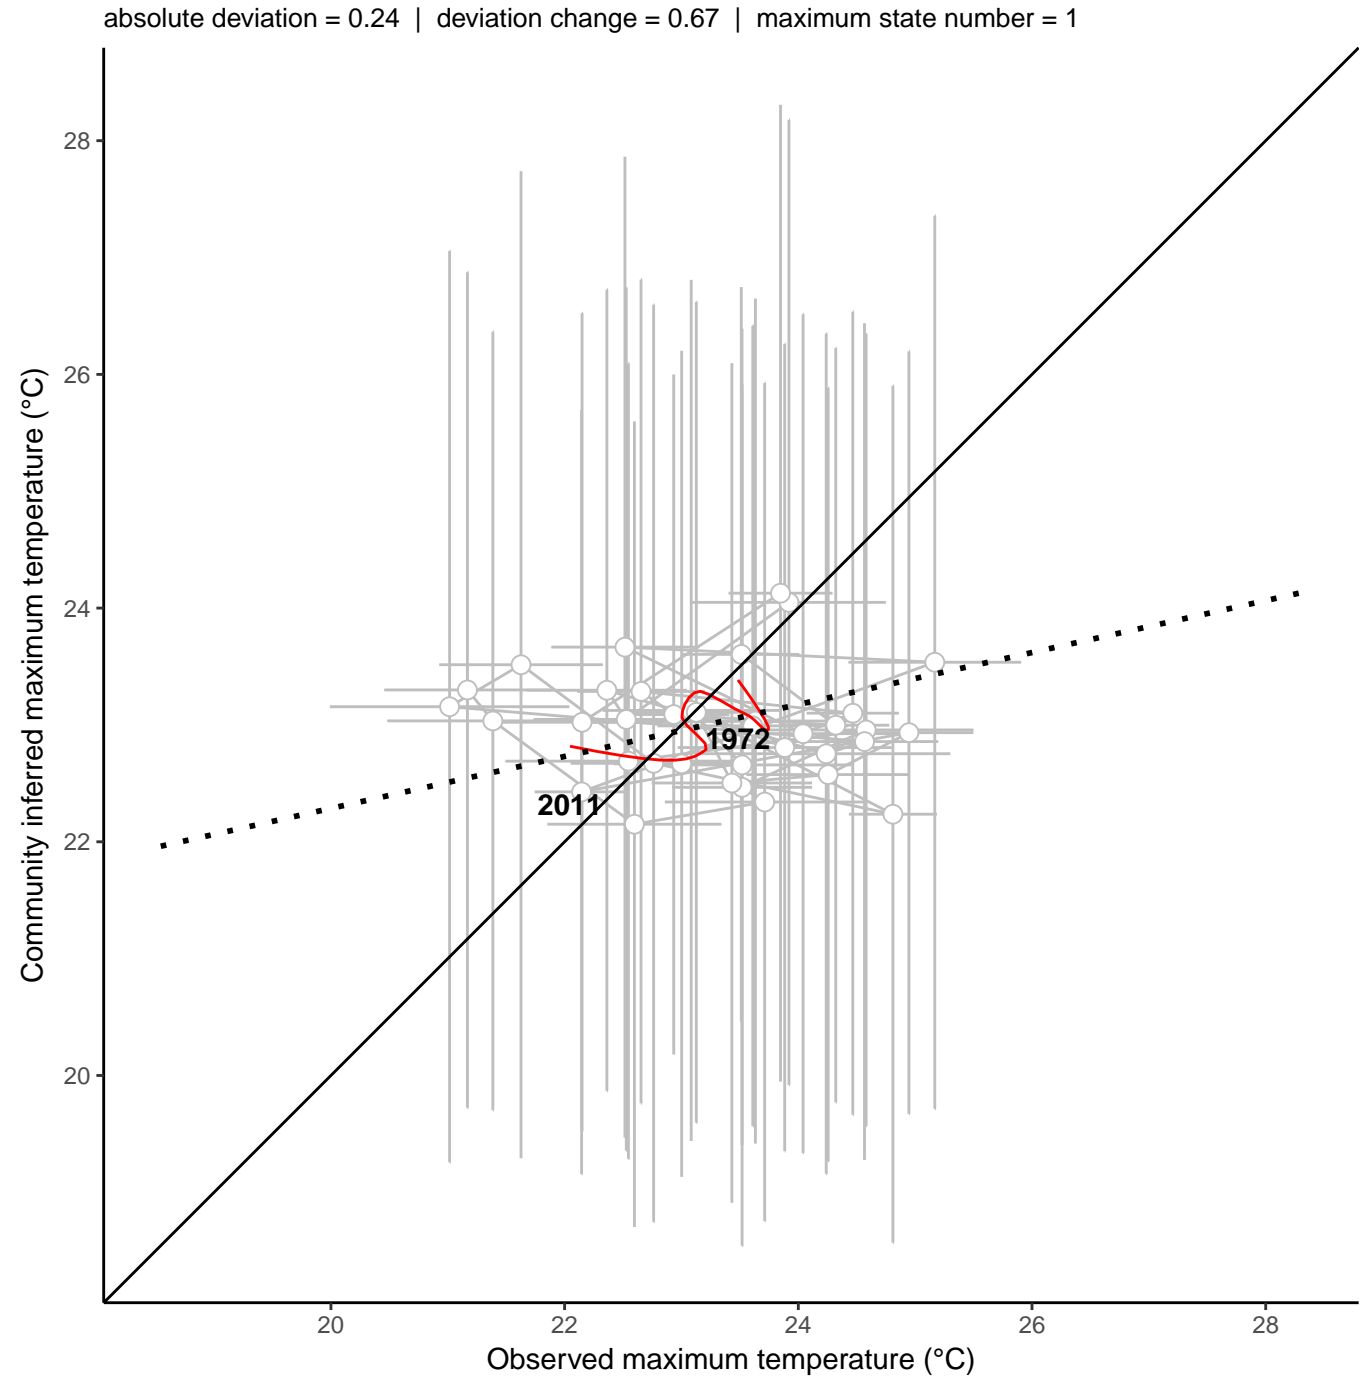

site : 840\_88\_19

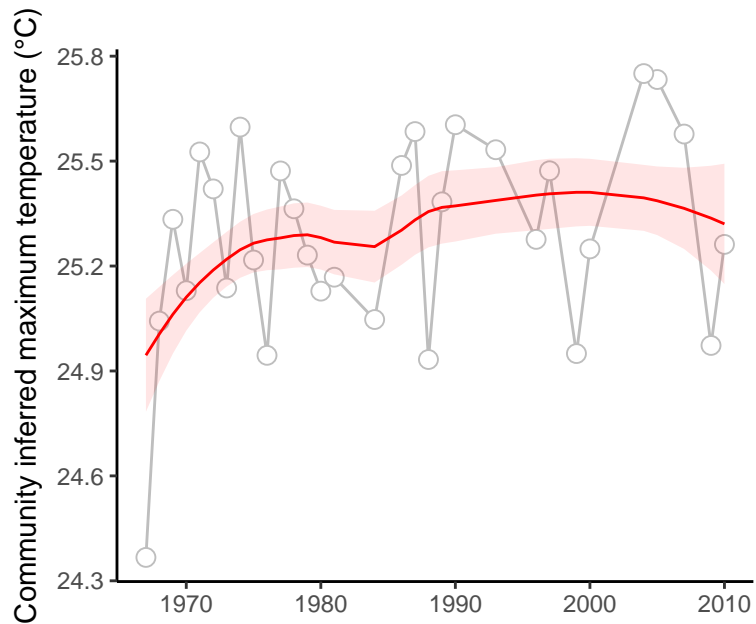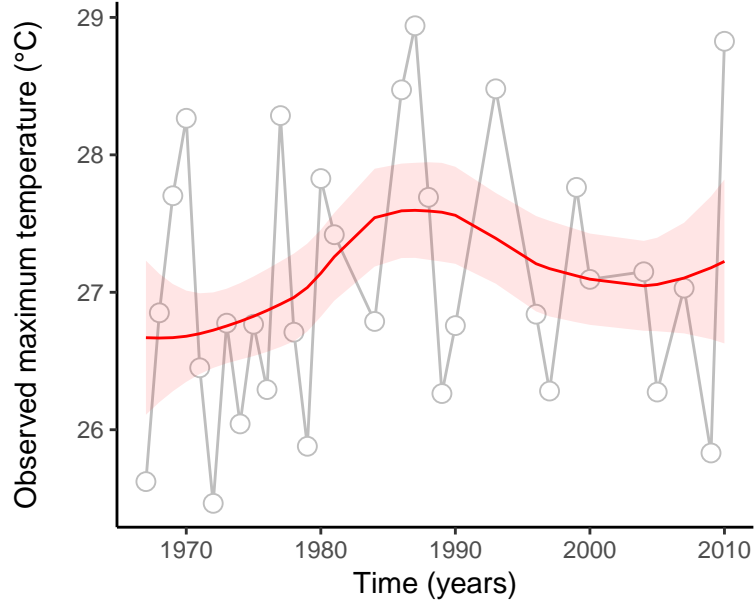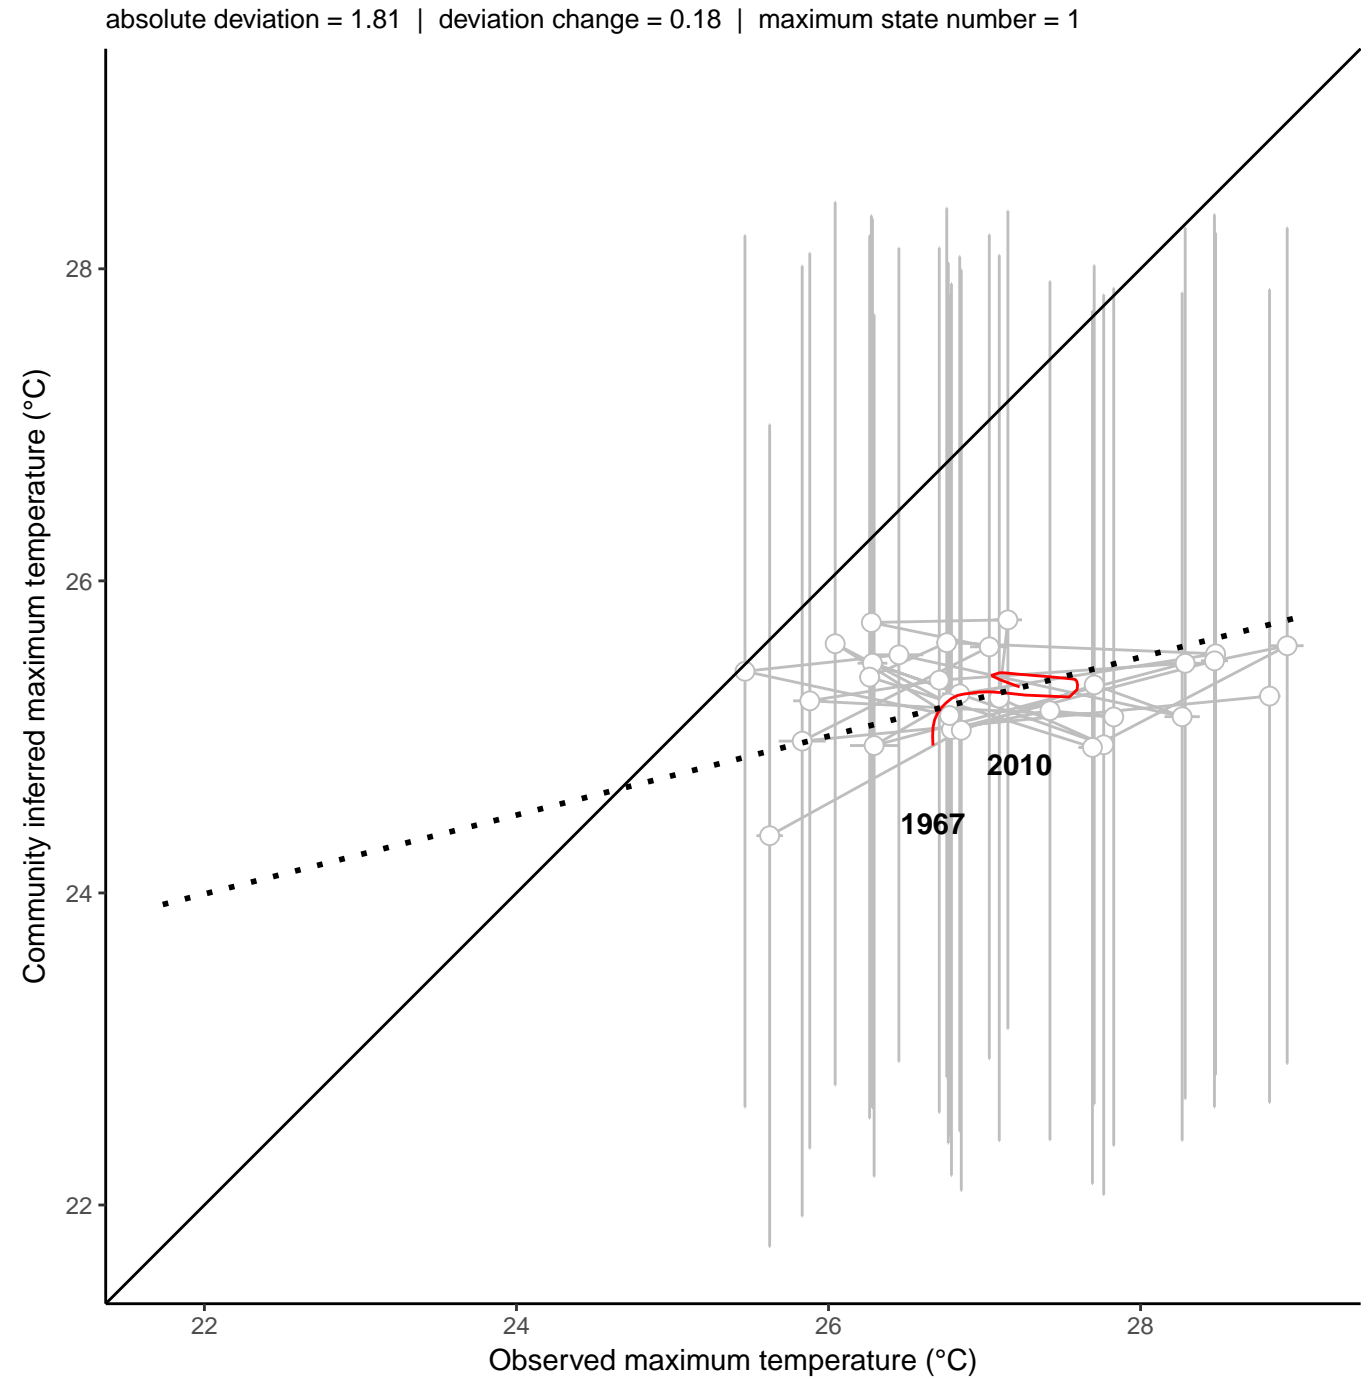

site : 840\_58\_14

absolute deviation = 0.64 | deviation change = -0.15 | maximum state number = 1

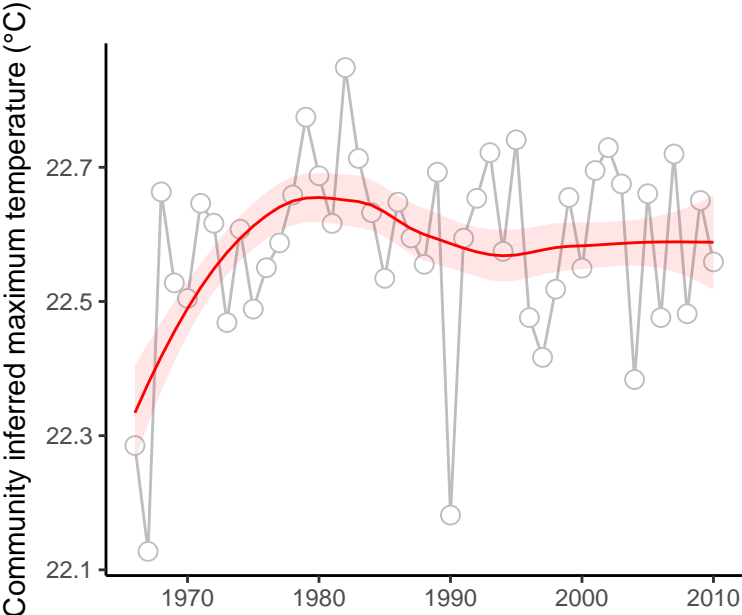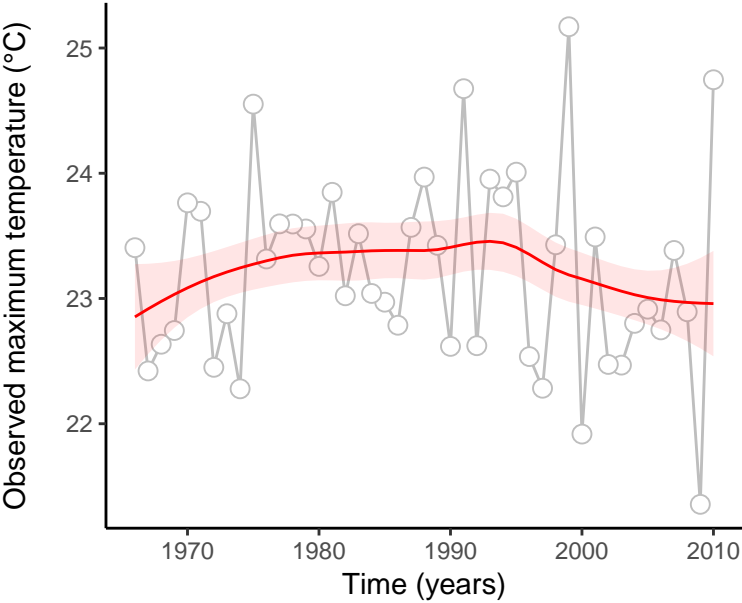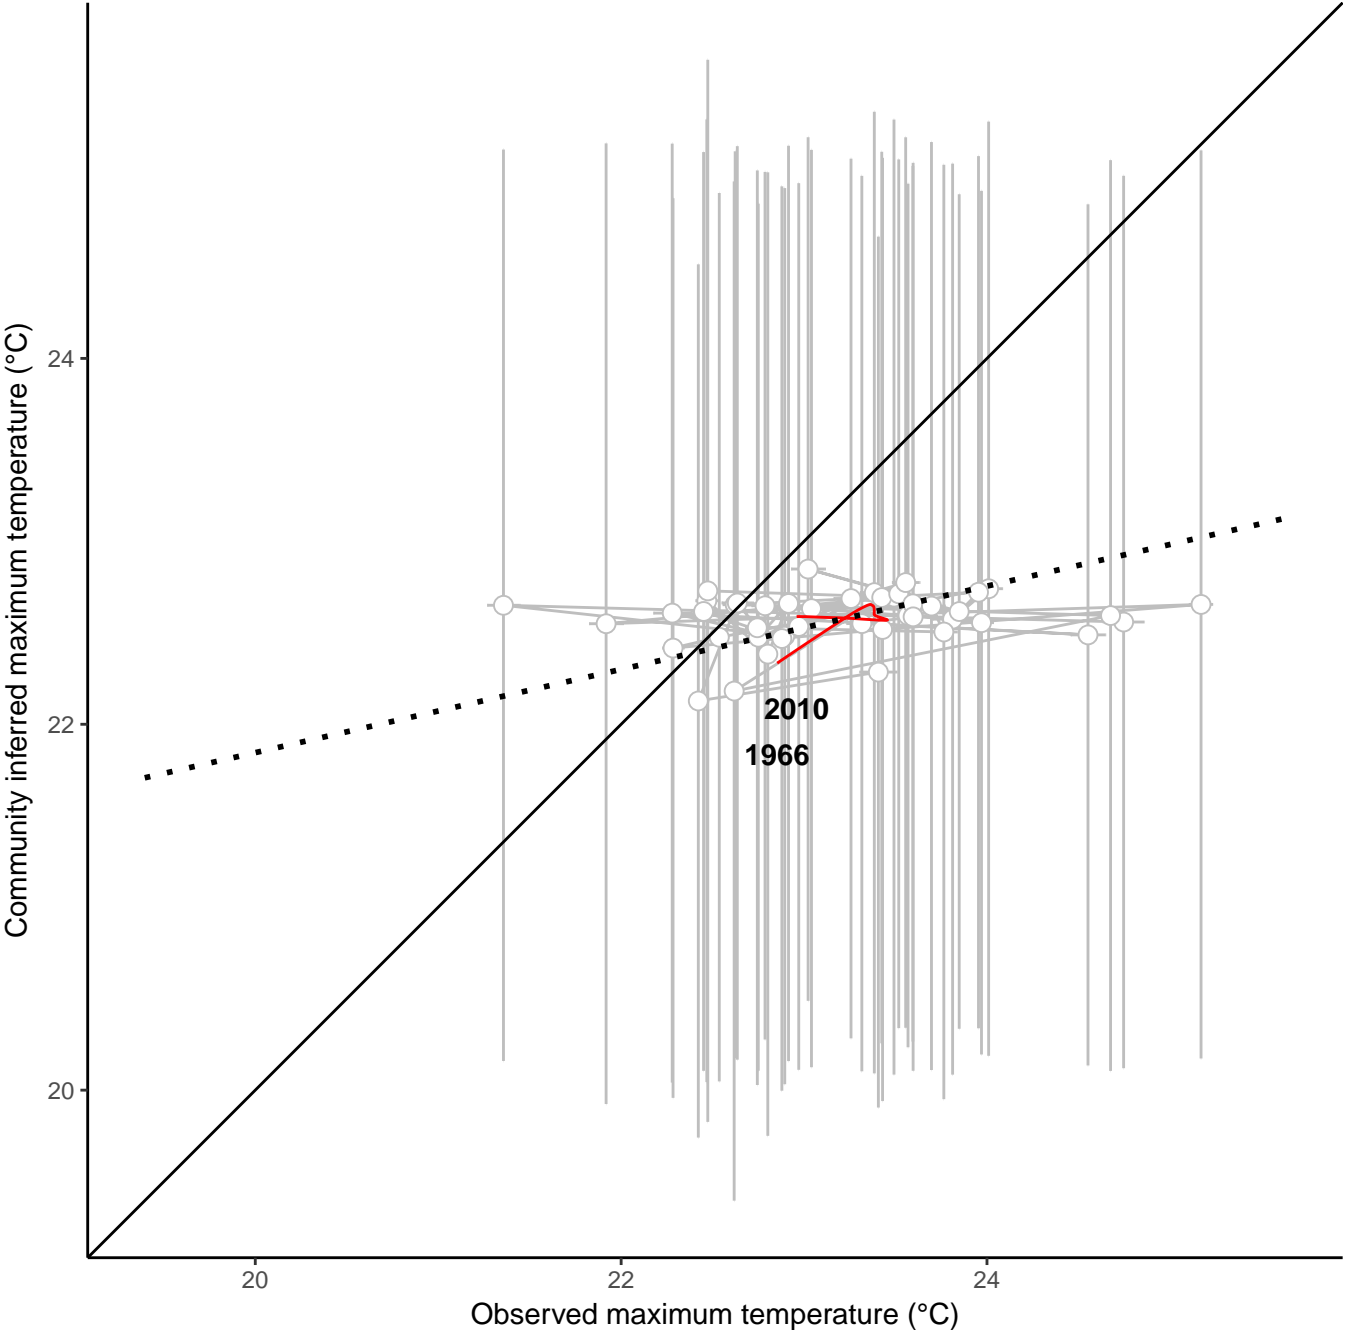

site : 840\_88\_24

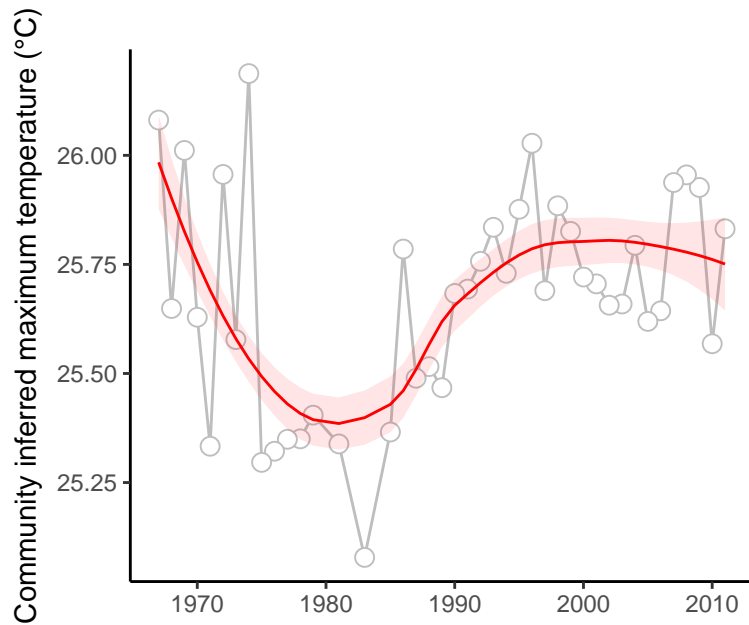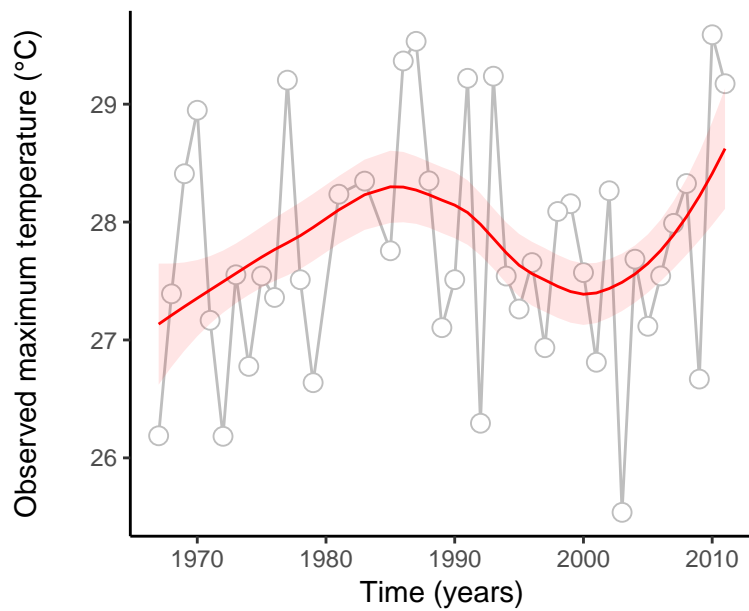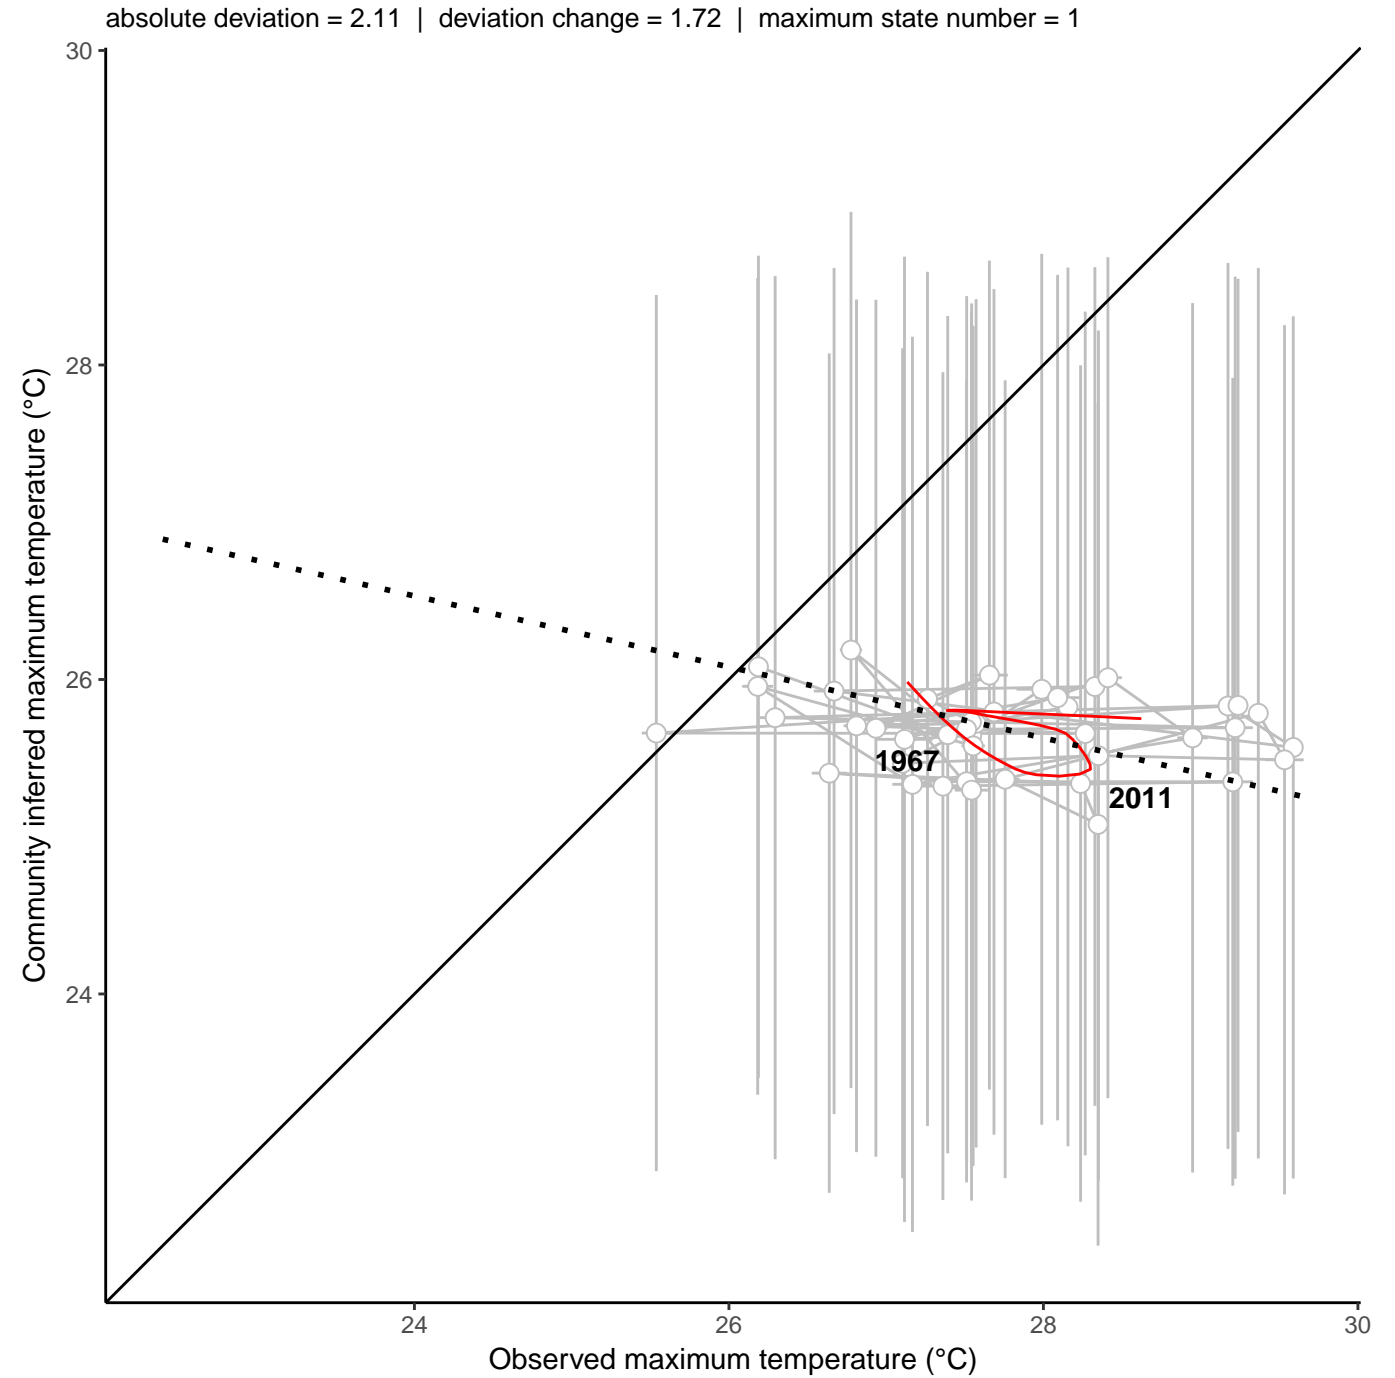



site : 840\_47\_3

absolute deviation = 0.43 | deviation change = -0.05 | maximum state number = 1

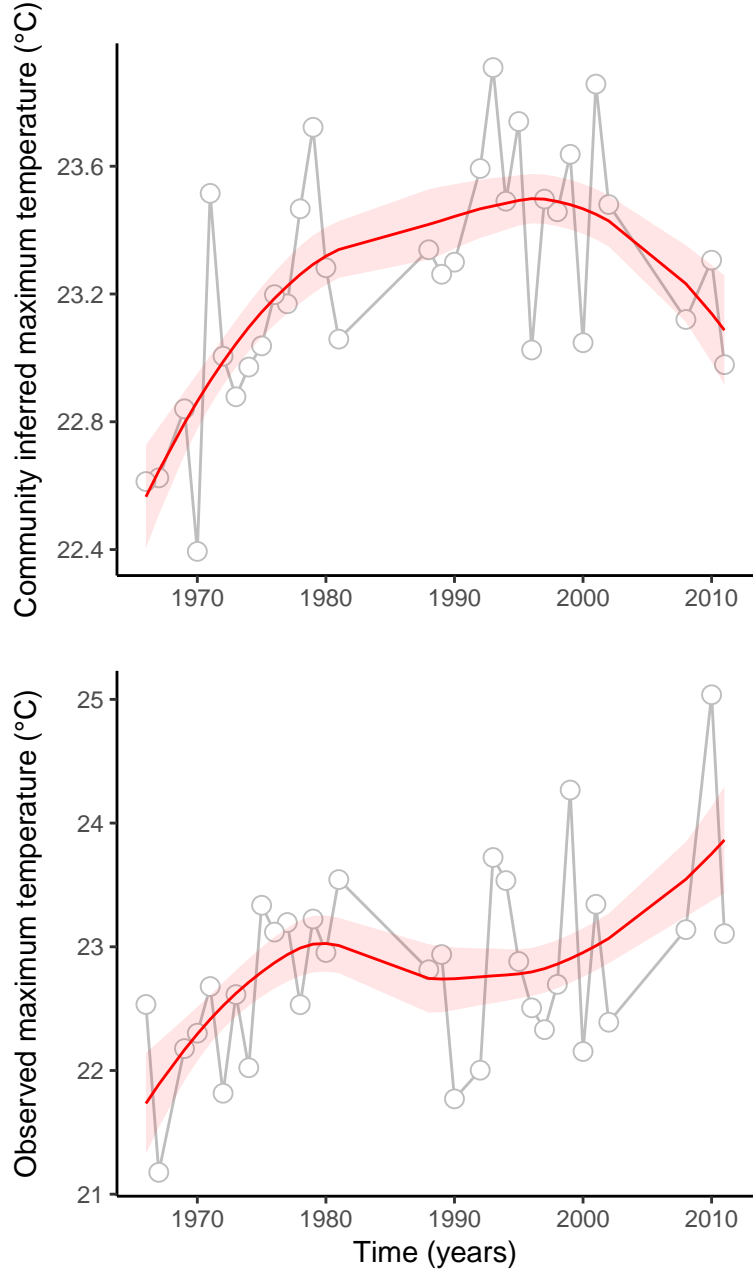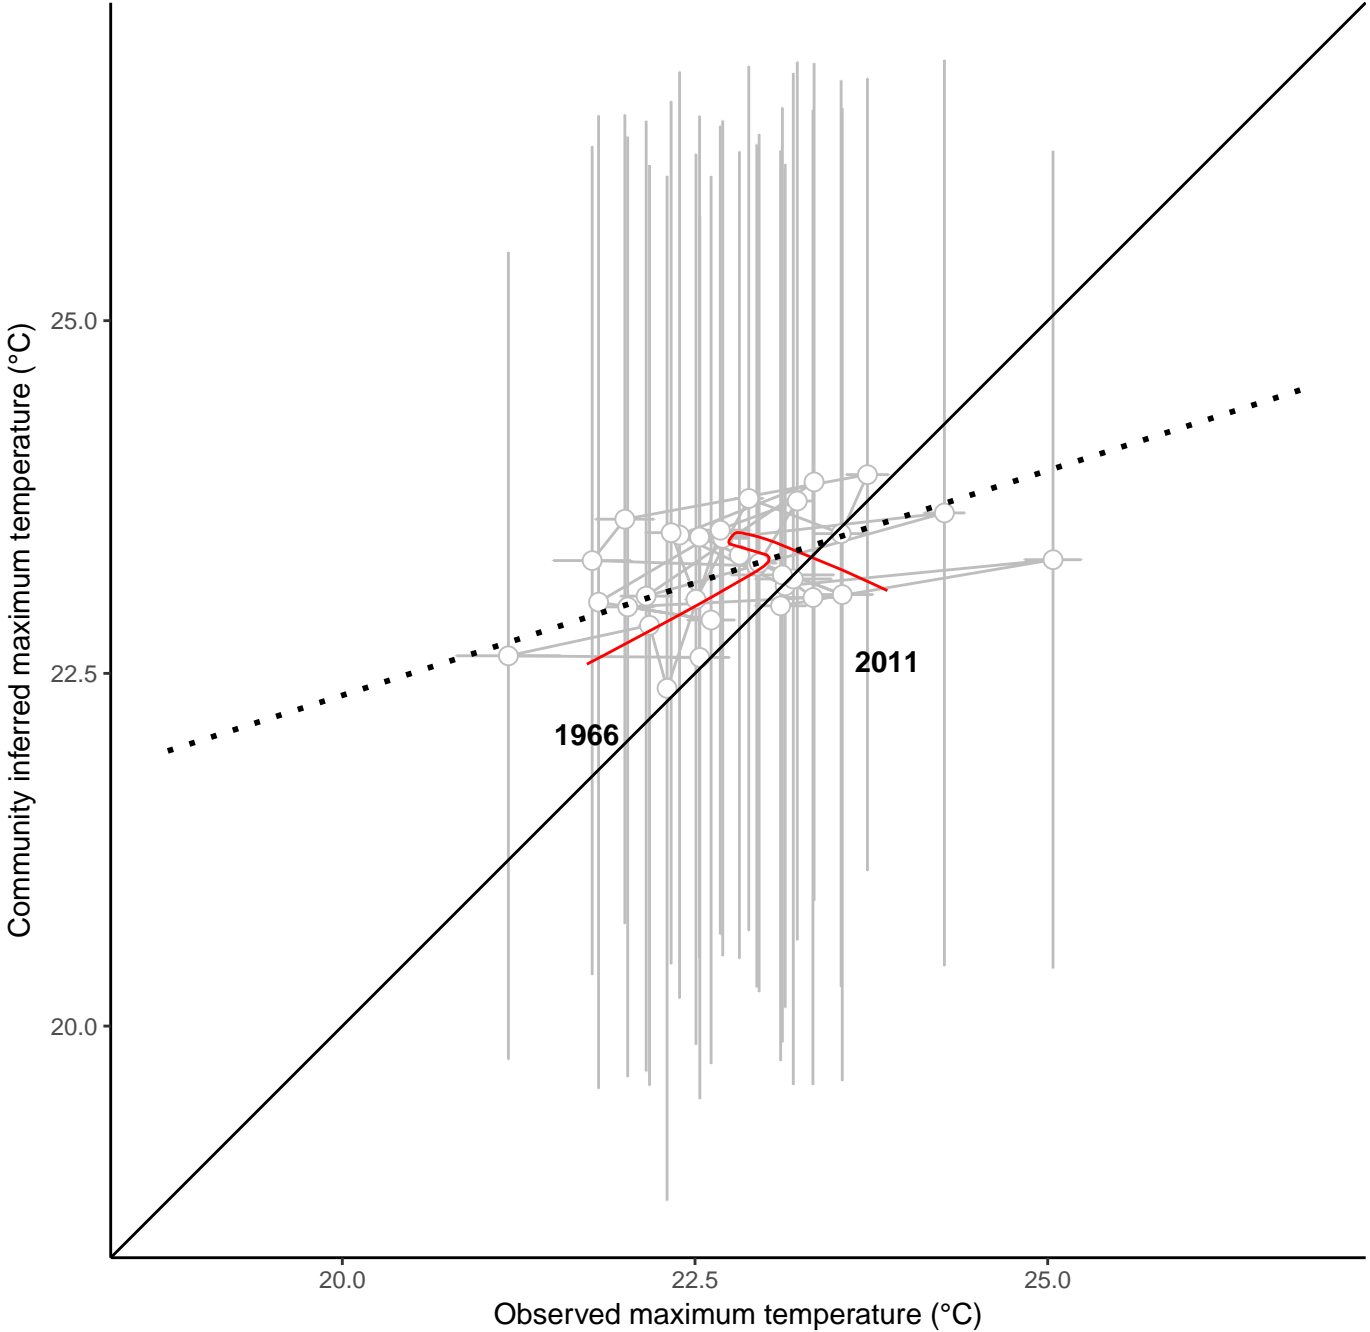

site : 840\_90\_51

absolute deviation = 2.59 | deviation change = -0.25 | maximum state number = 1

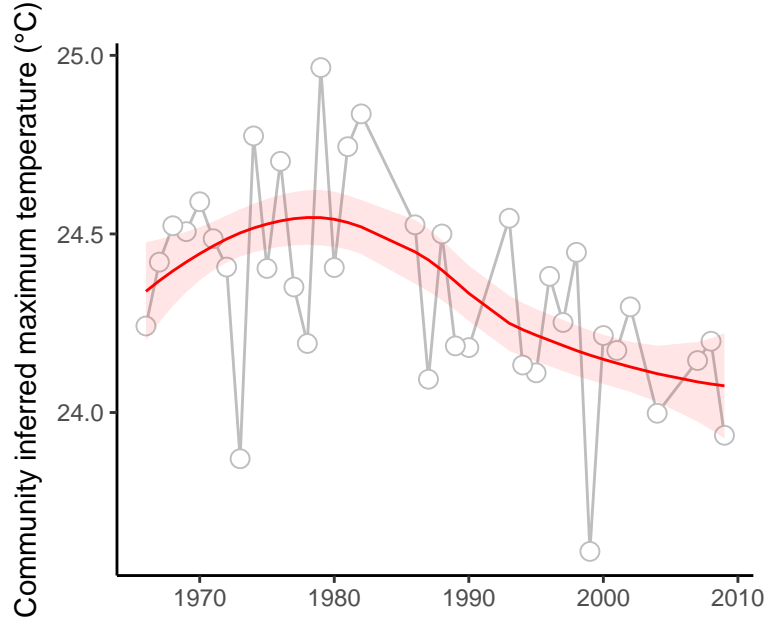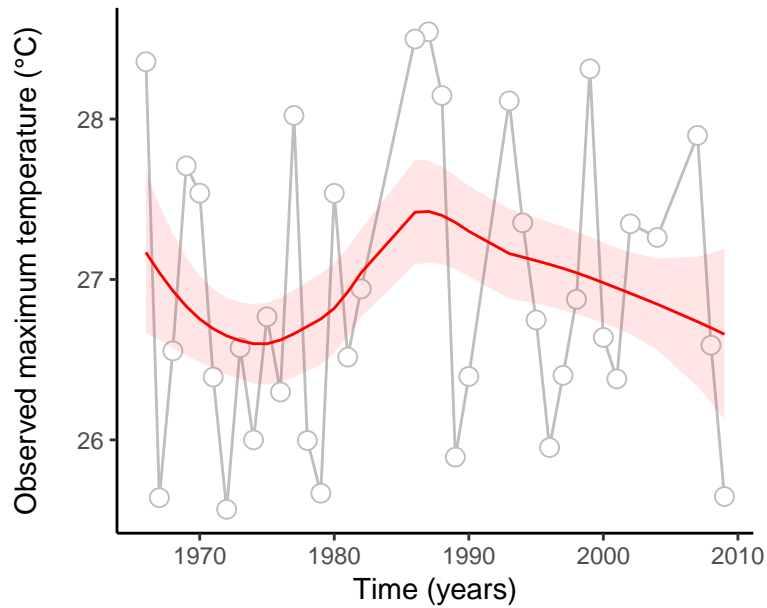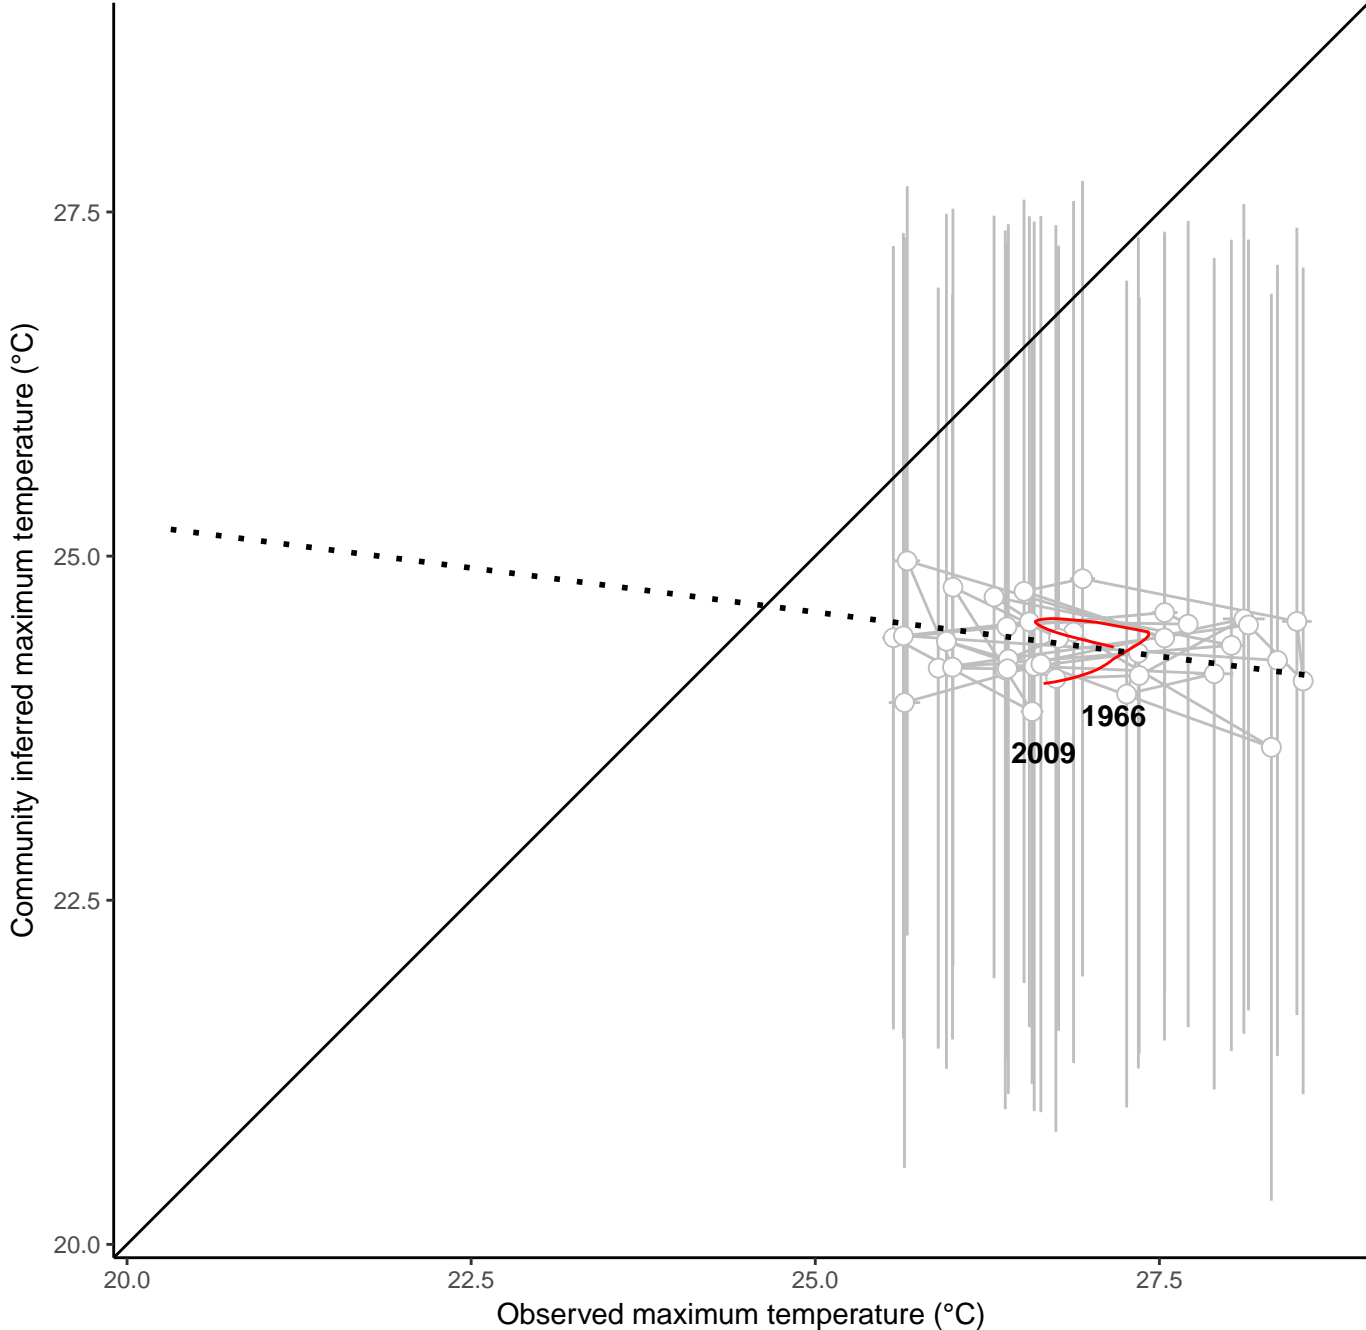

site : 840\_38\_9

absolute deviation = 5.3 | deviation change = -0.41 | maximum state number = 1

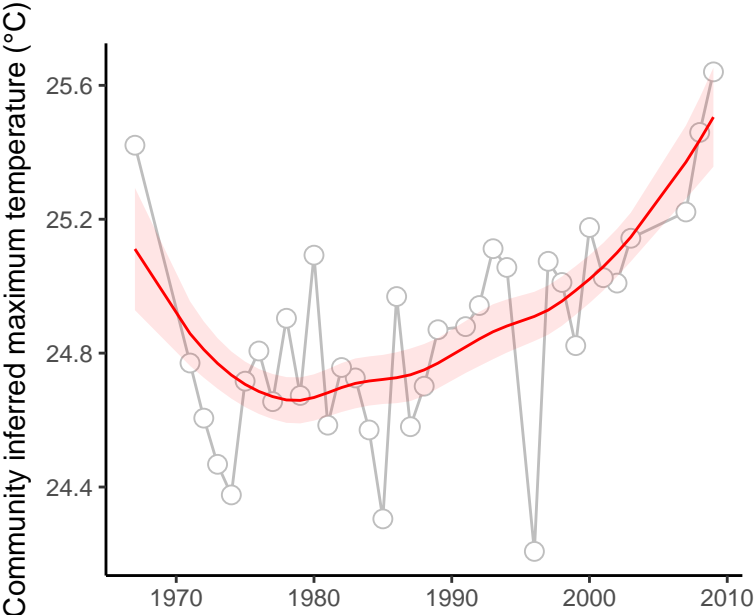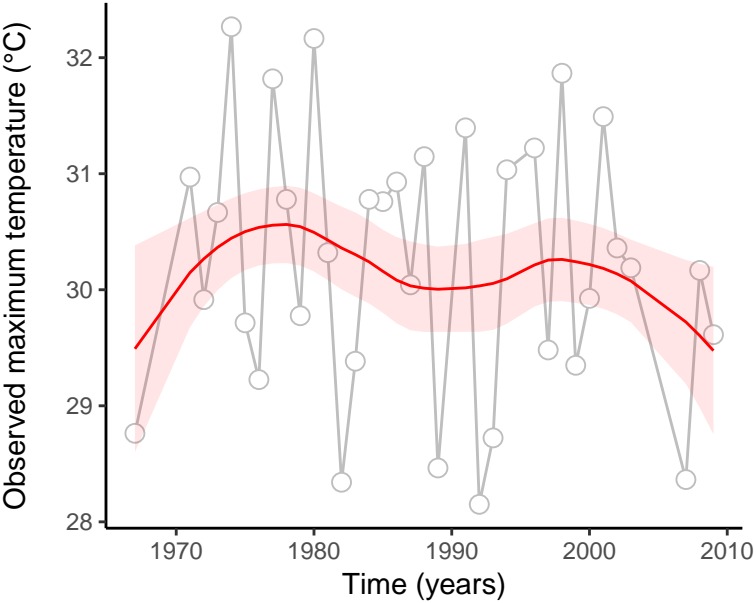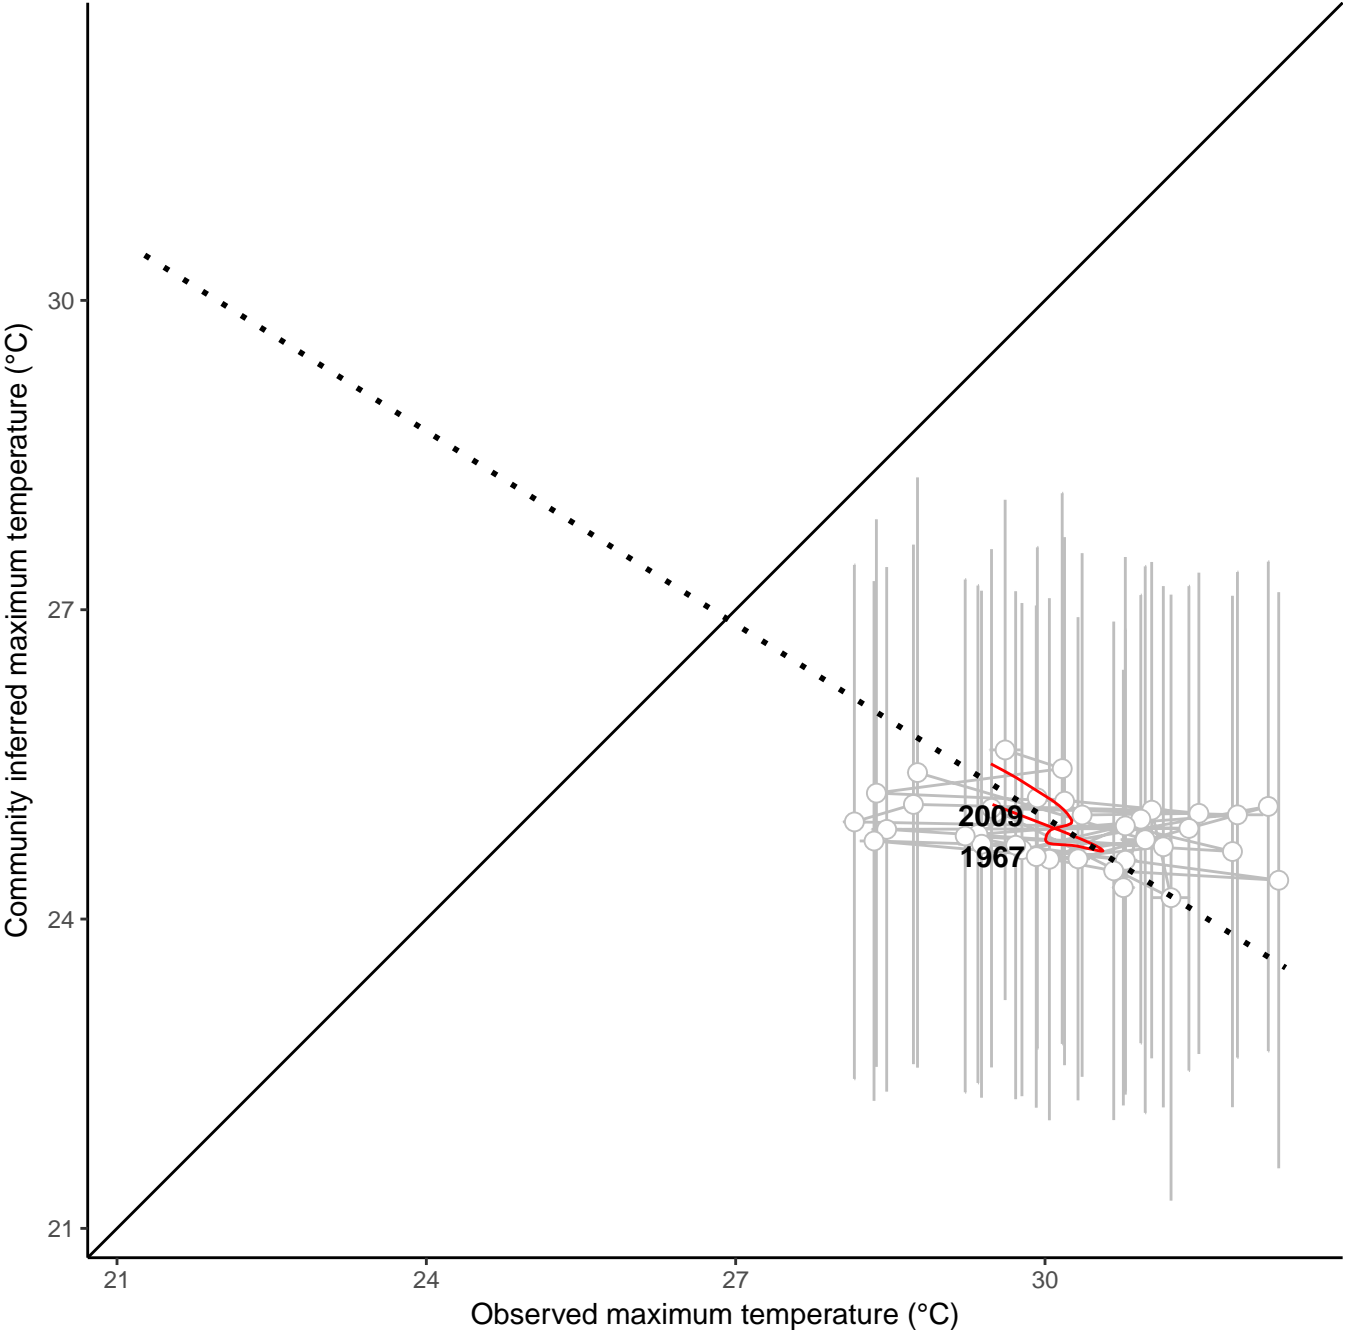

site : 840\_91\_4

absolute deviation = 0.33 | deviation change = -0.06 | maximum state number = 1

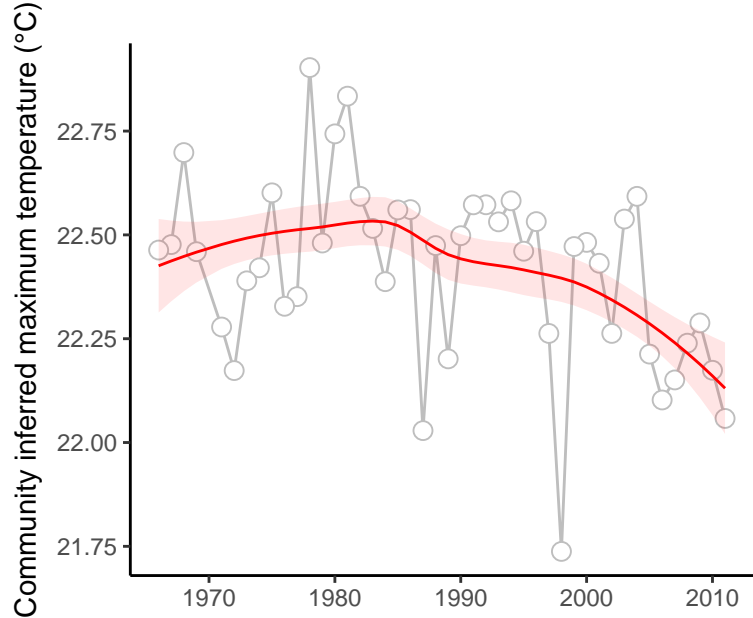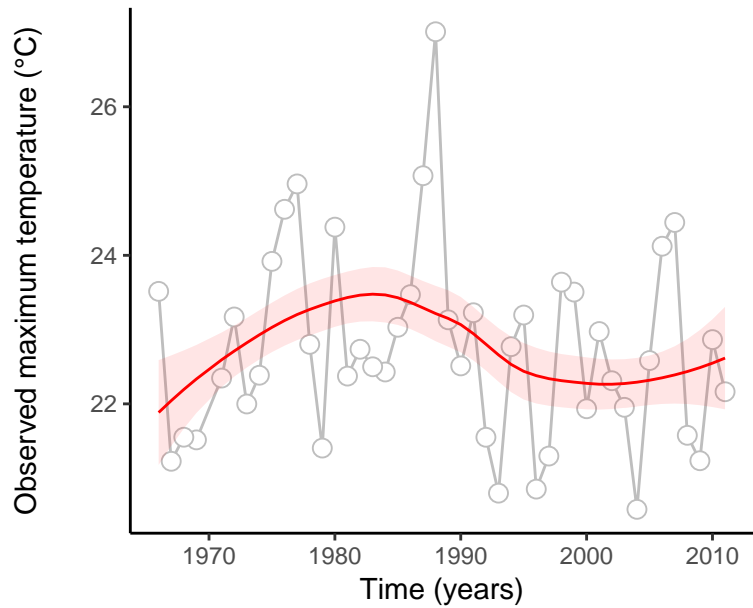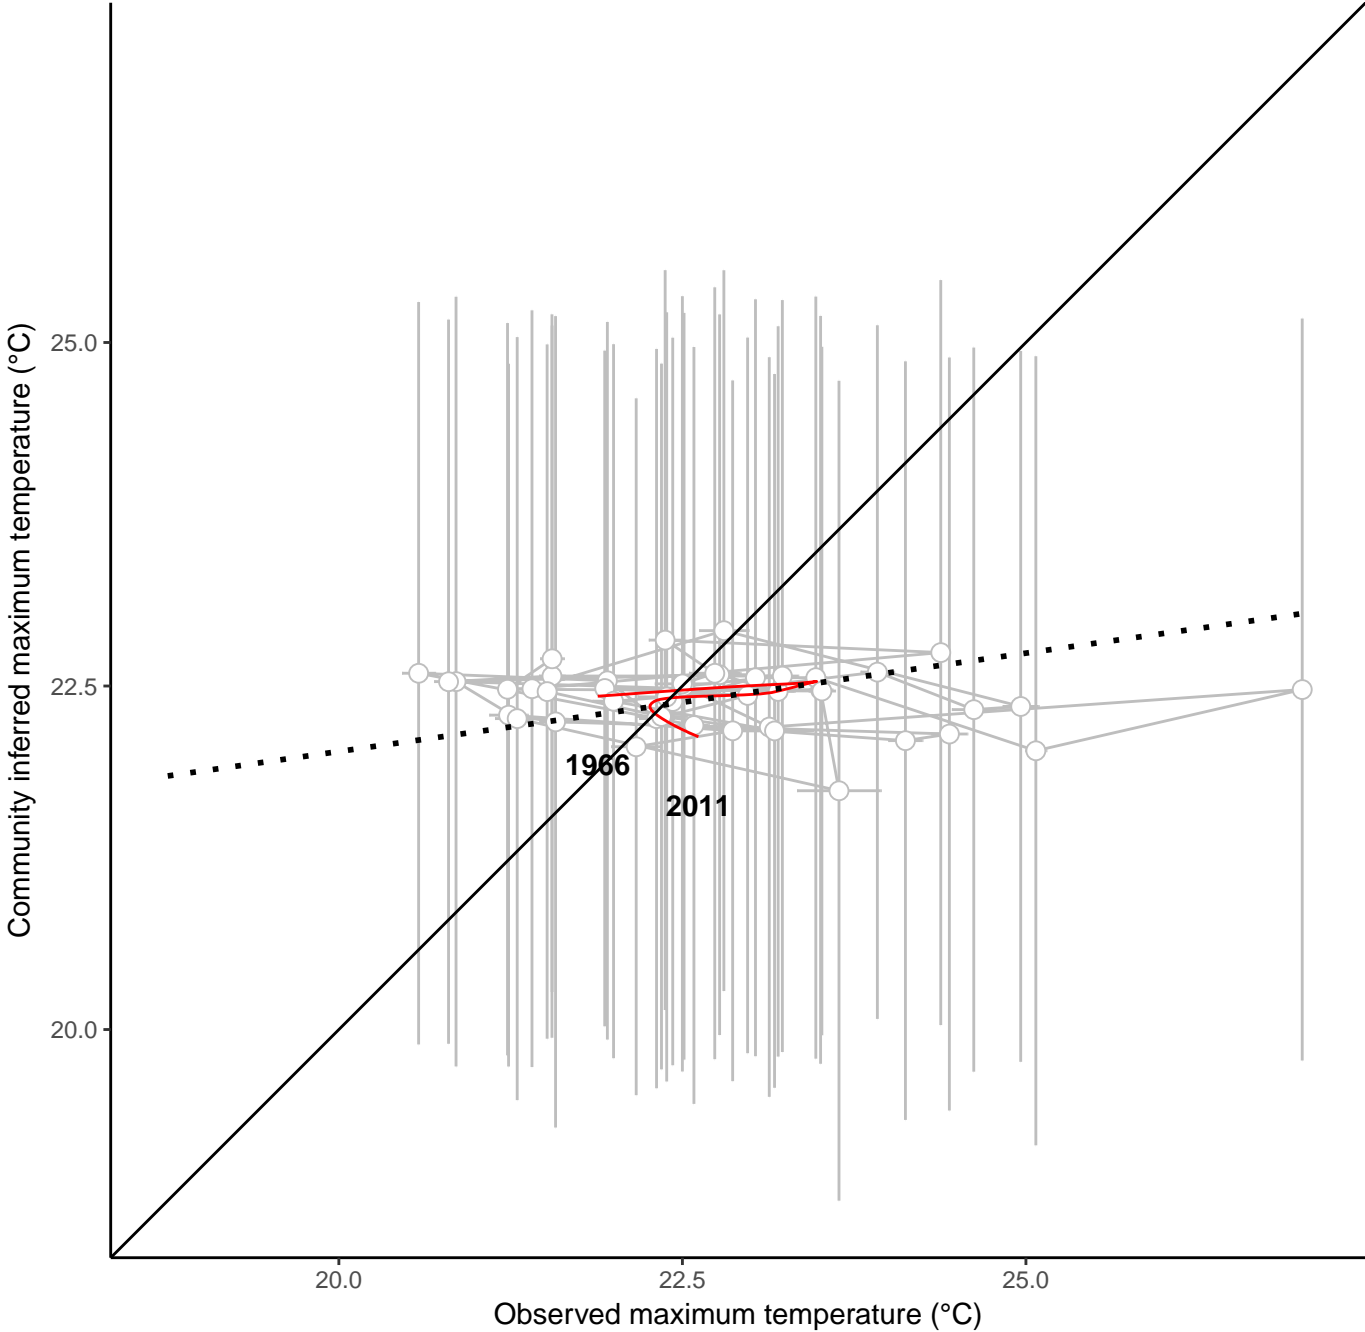

site : 840\_34\_61

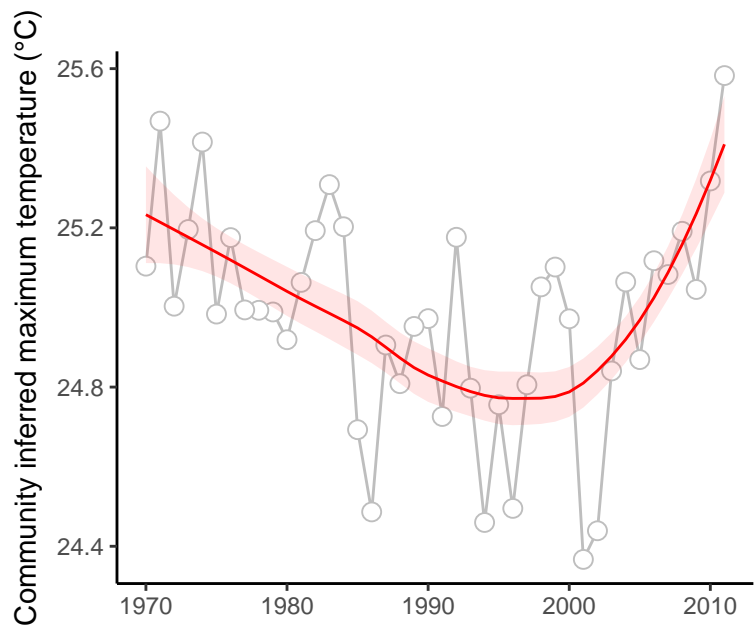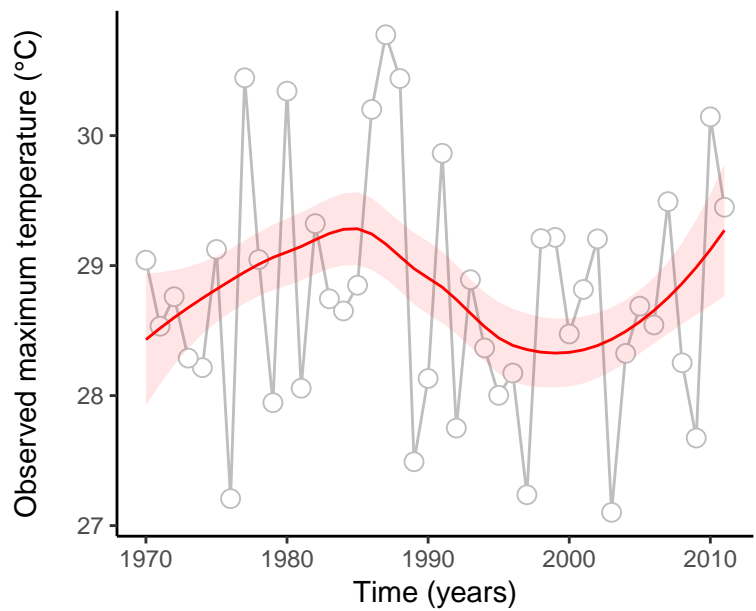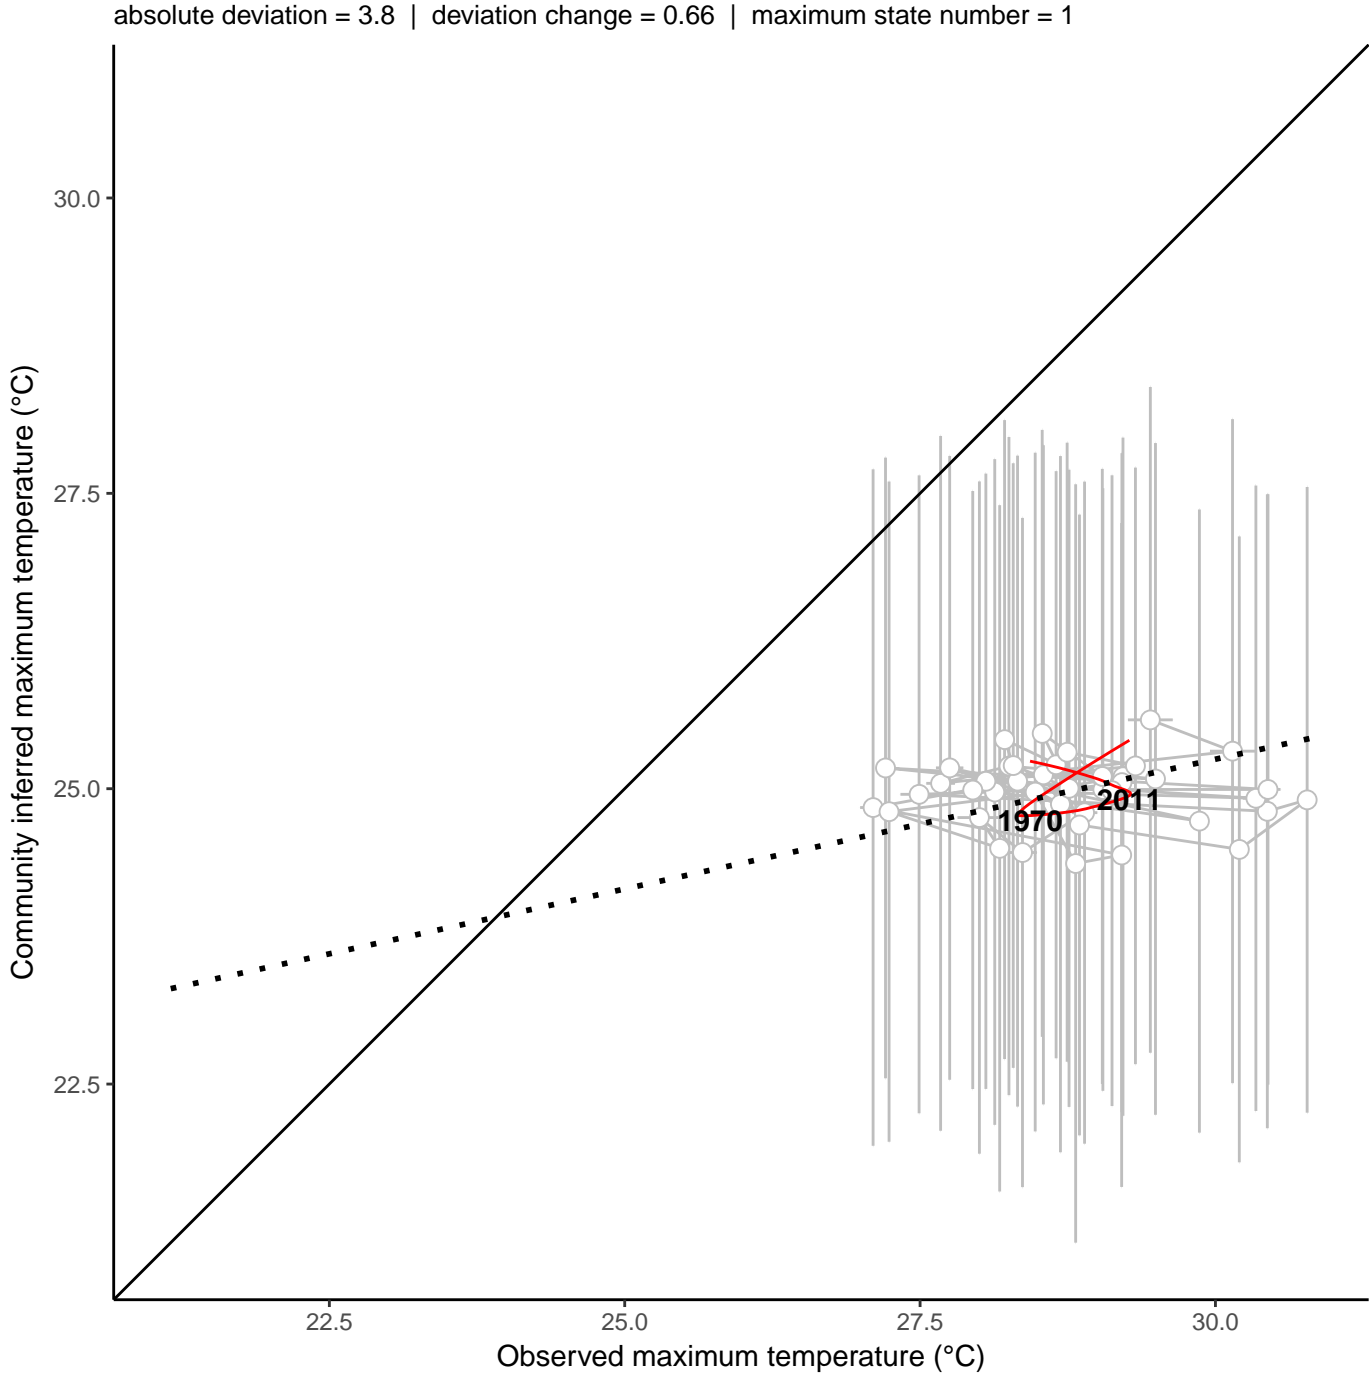

site : 840\_58\_11

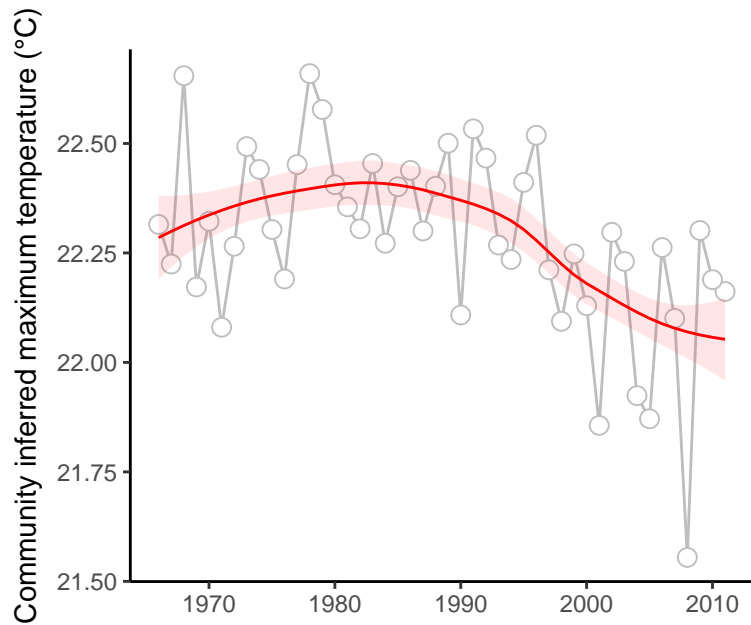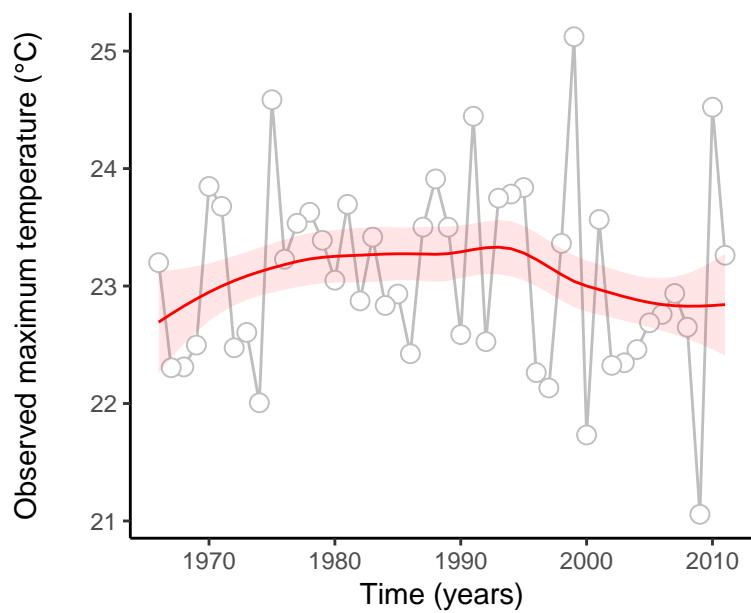

absolute deviation = 0.8 | deviation change = 0.38 | maximum state number = 1

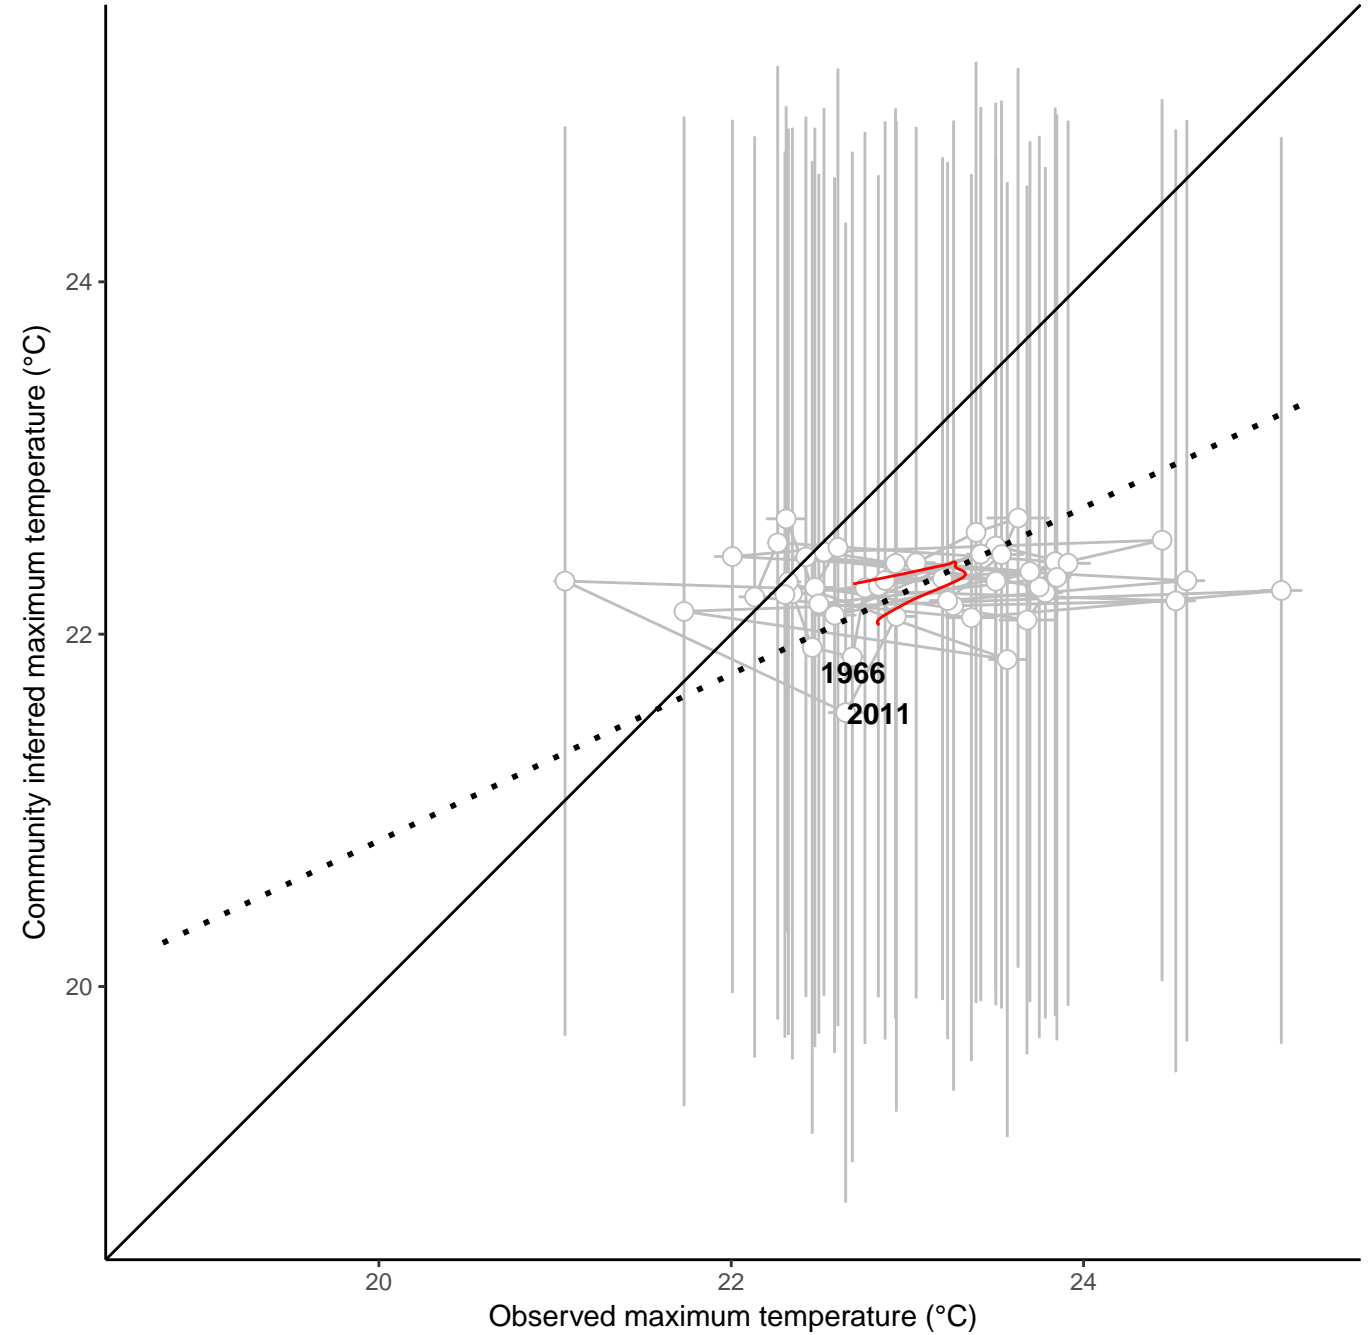

site : 840\_38\_29

absolute deviation = 3.21 | deviation change = -0.12 | maximum state number = 1

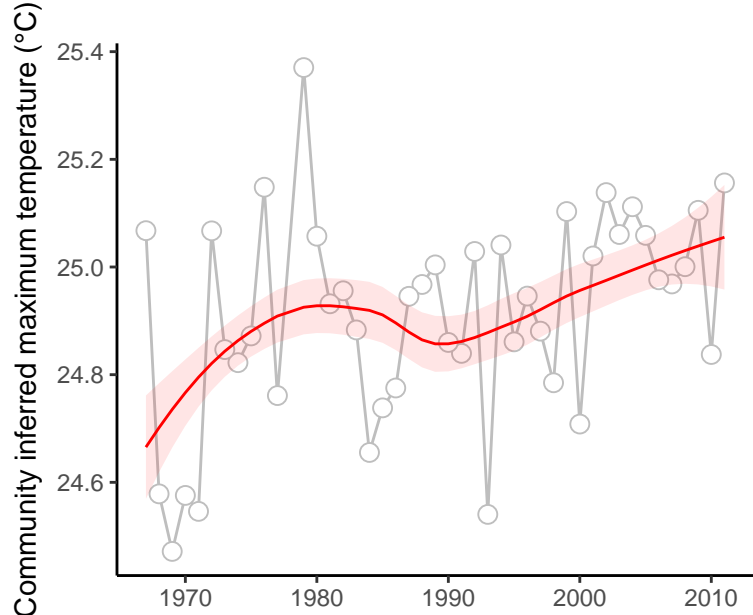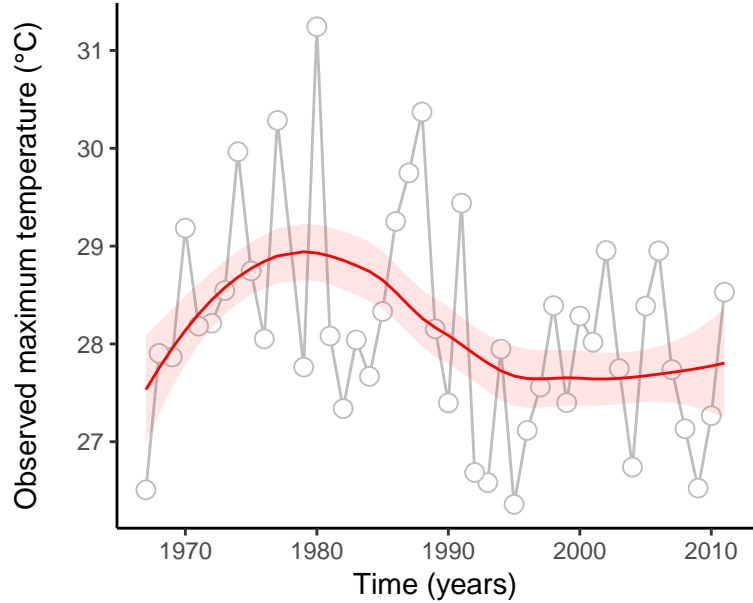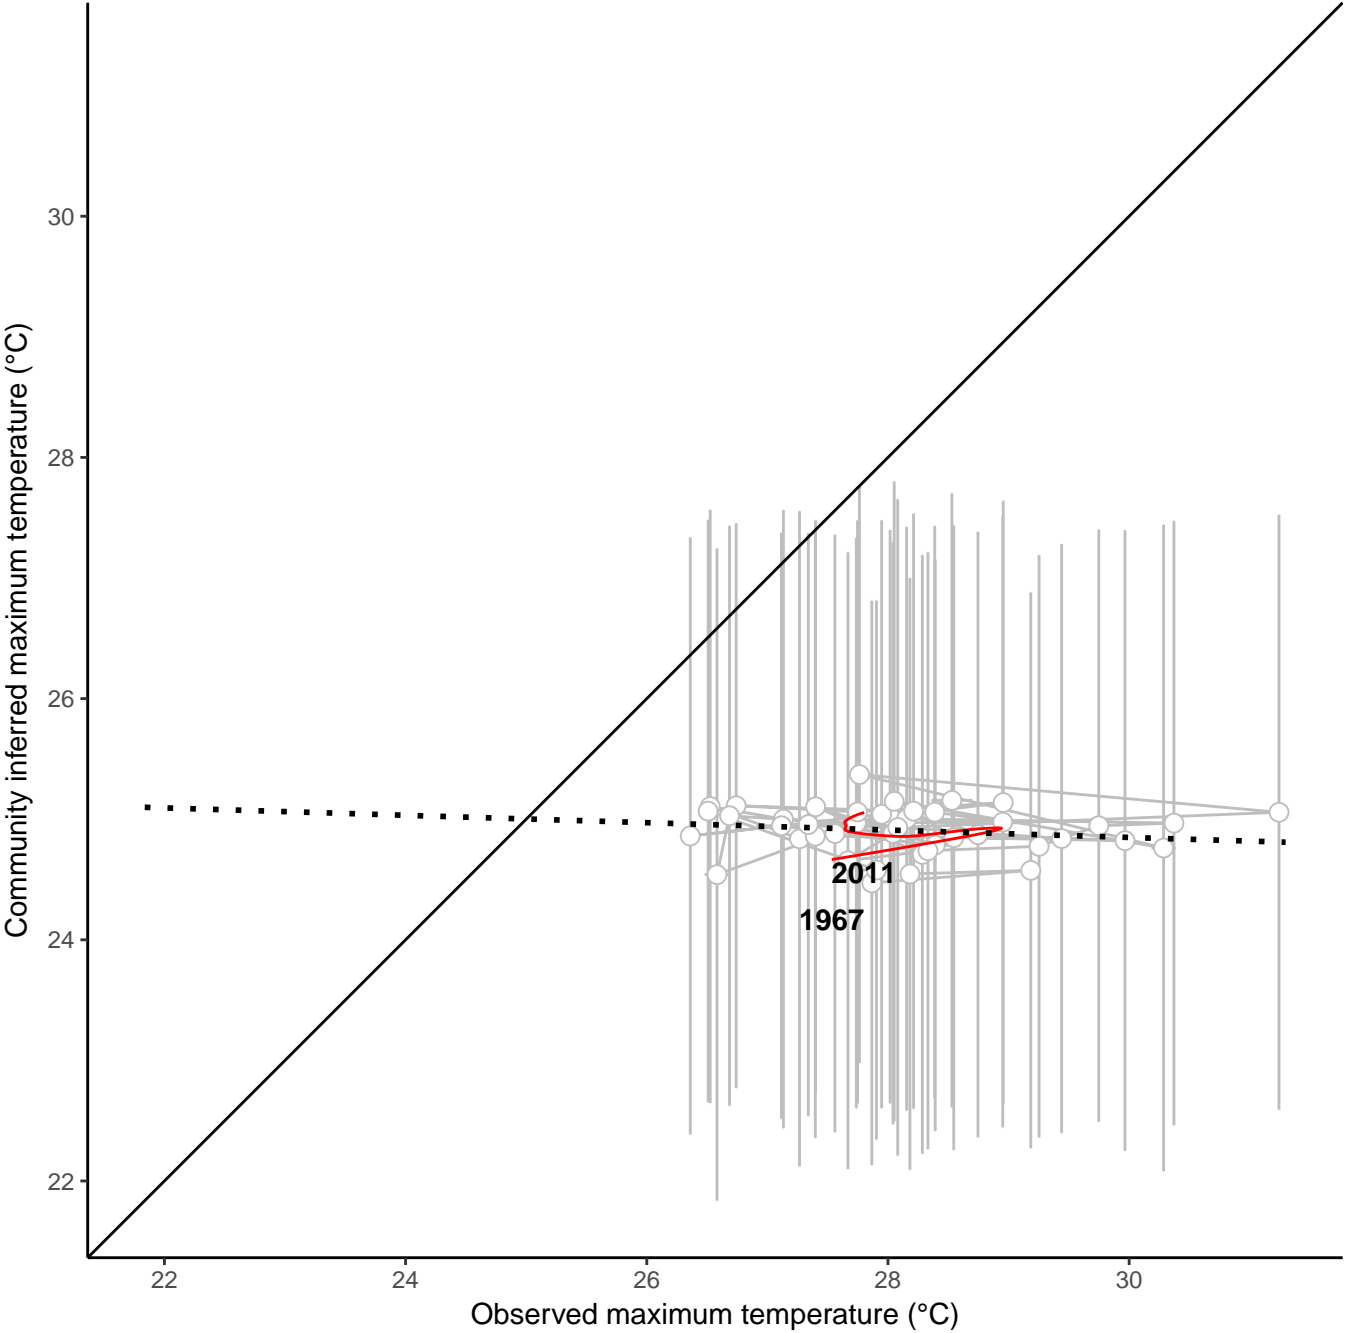

site : 840\_38\_11

absolute deviation = 5.81 | deviation change = -0.11 | maximum state number = 1

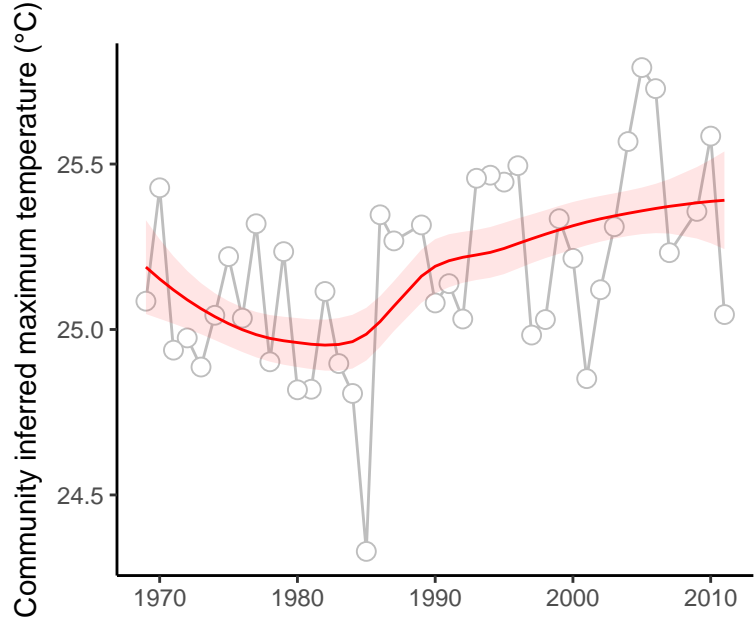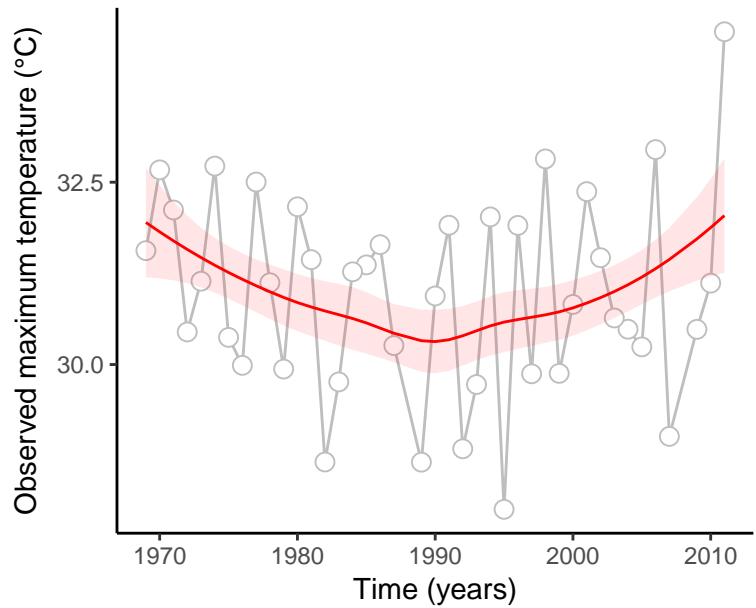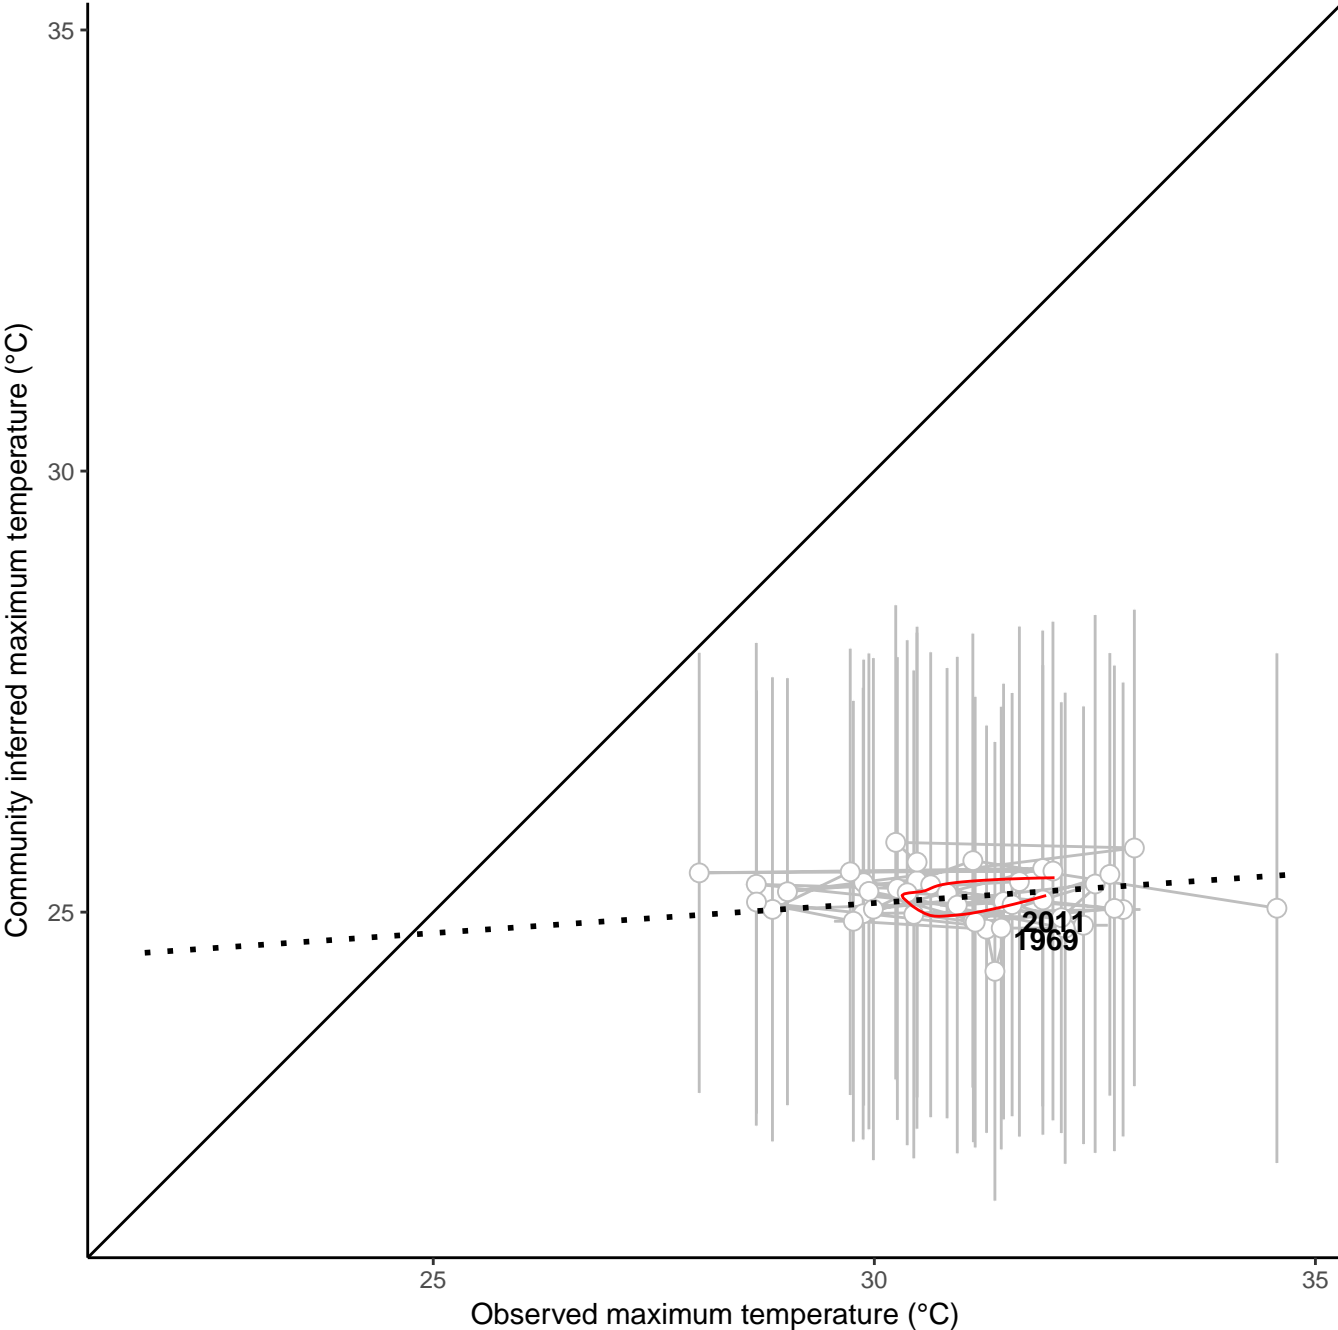



site : 840\_67\_23

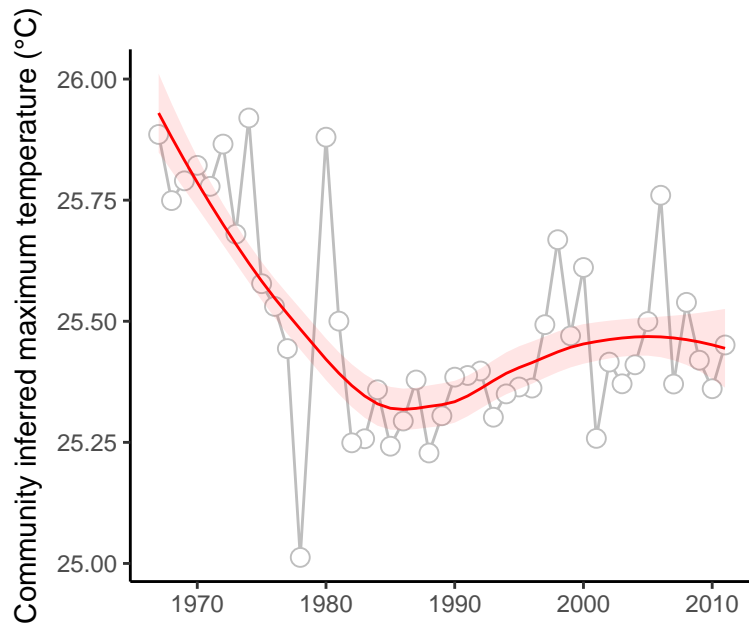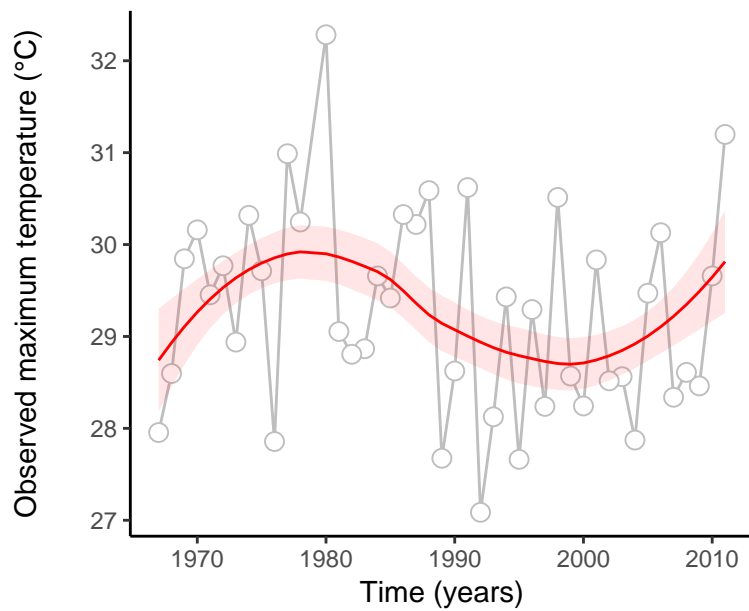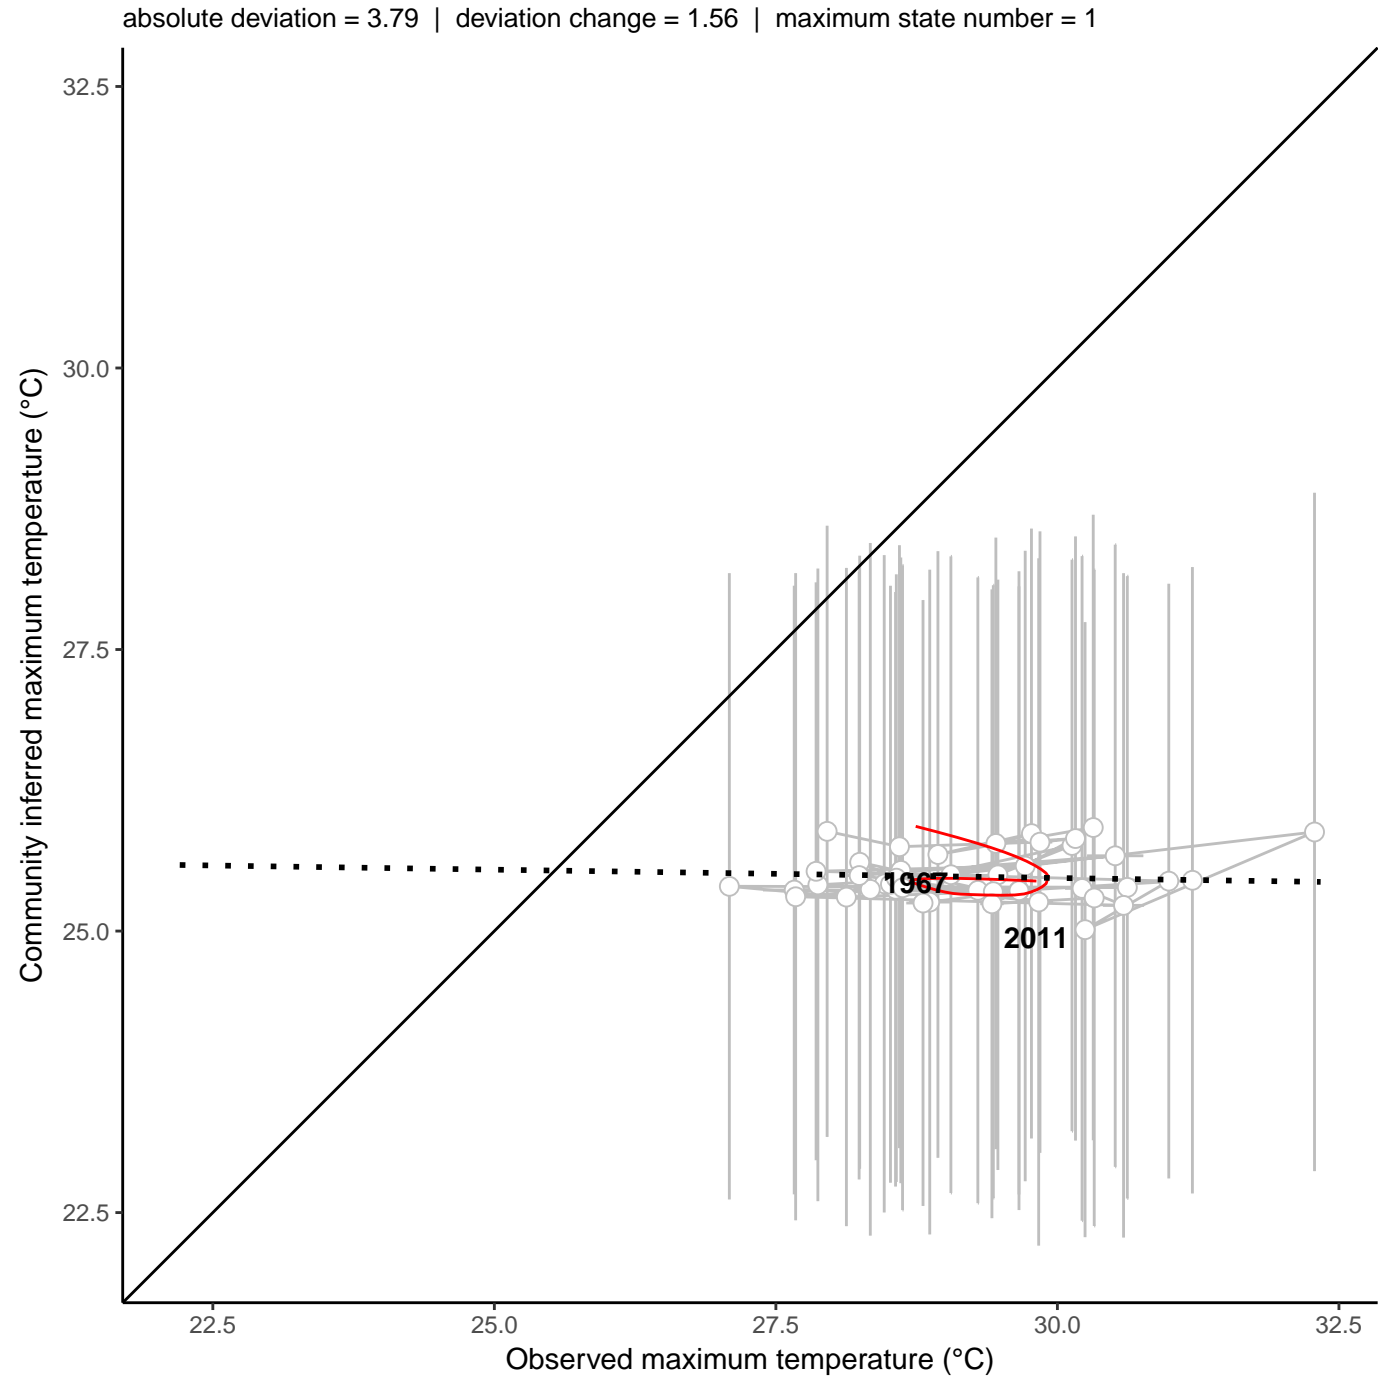

site : 840\_38\_26

absolute deviation = 3.02 | deviation change = 1.02 | maximum state number = 1

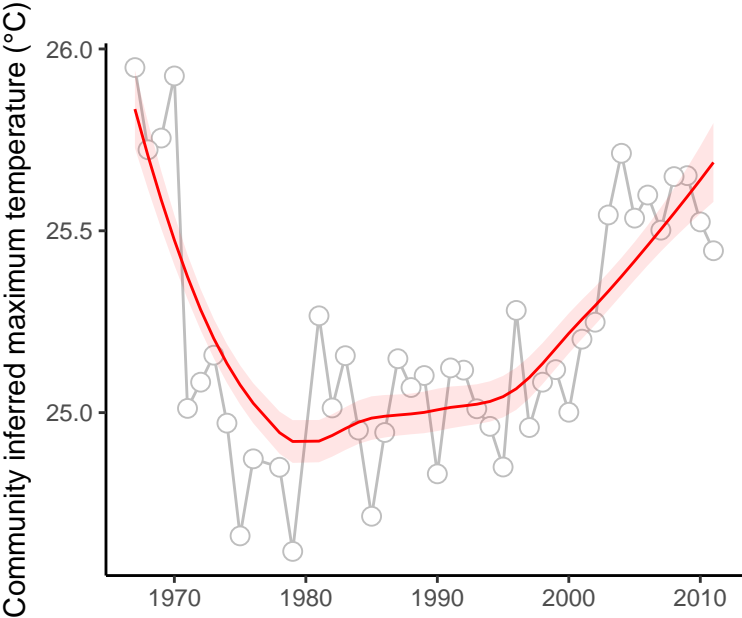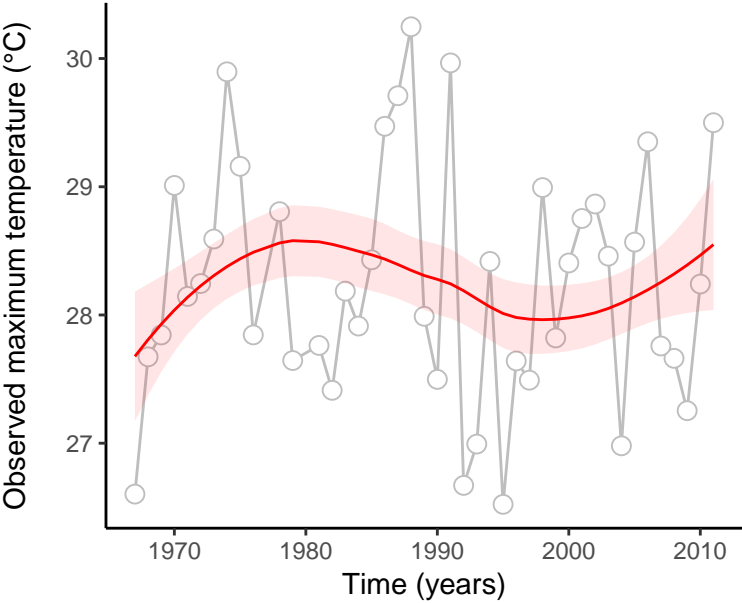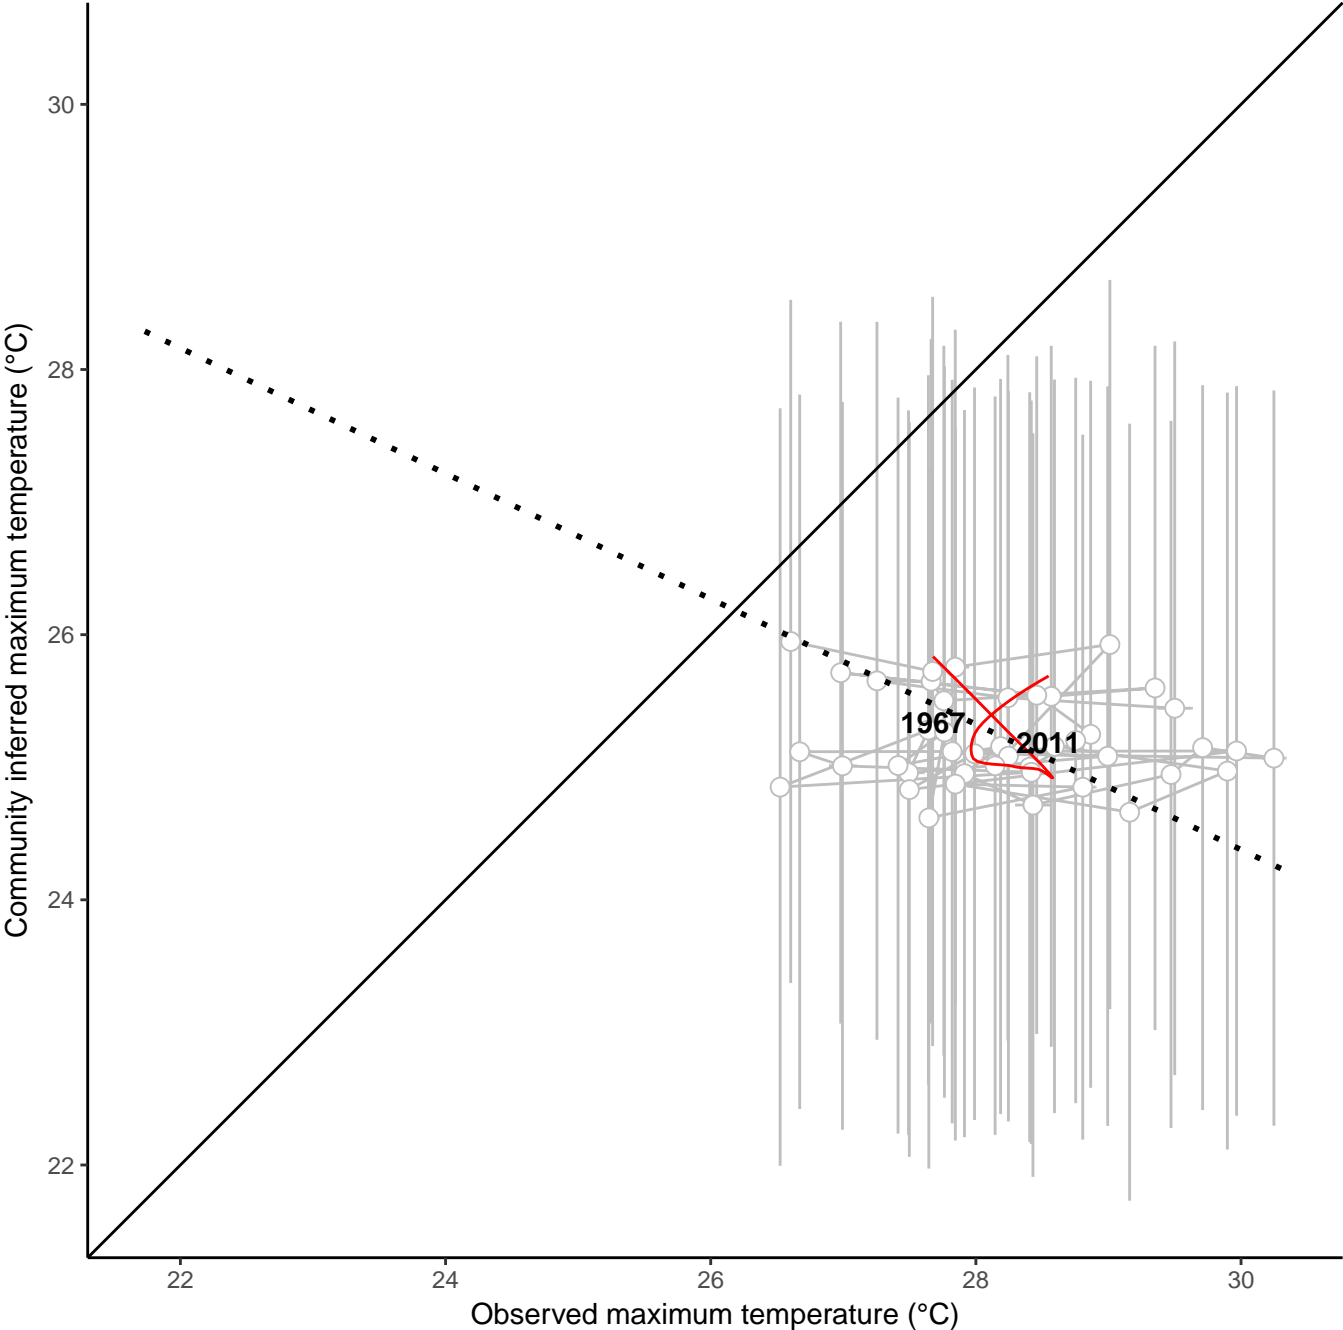

site : 840\_58\_5

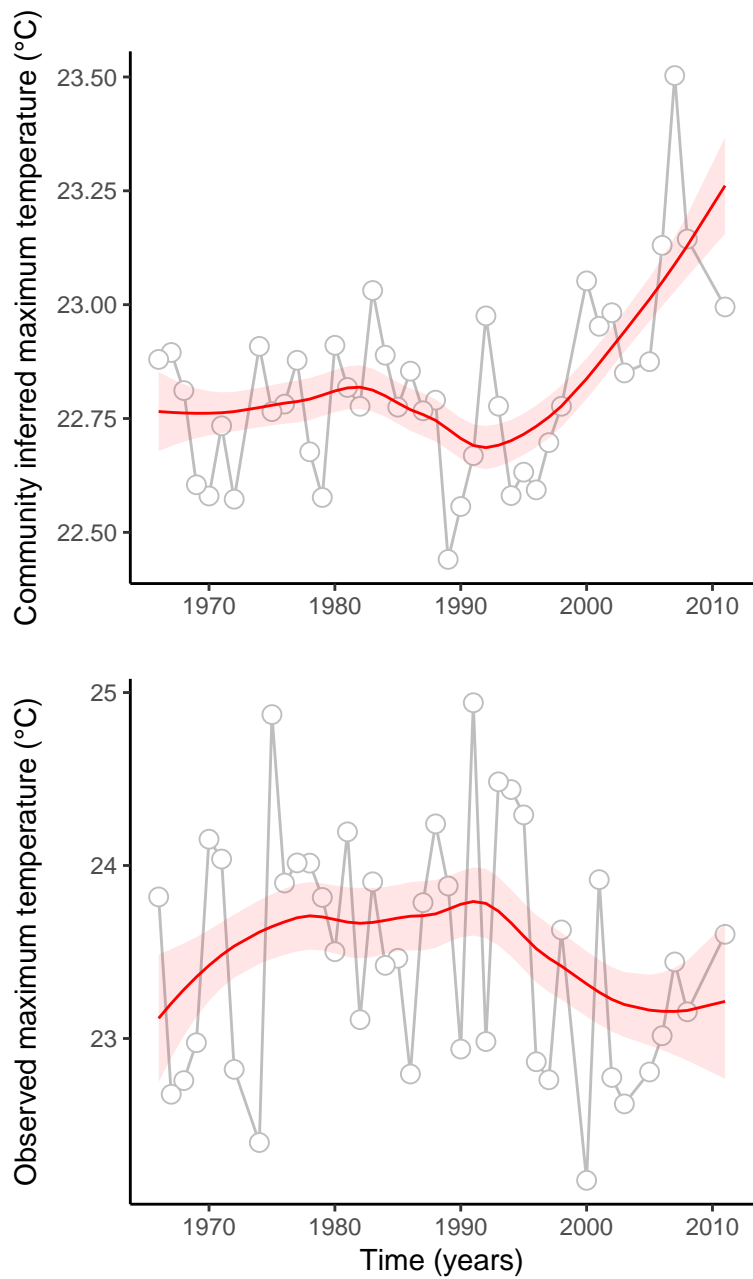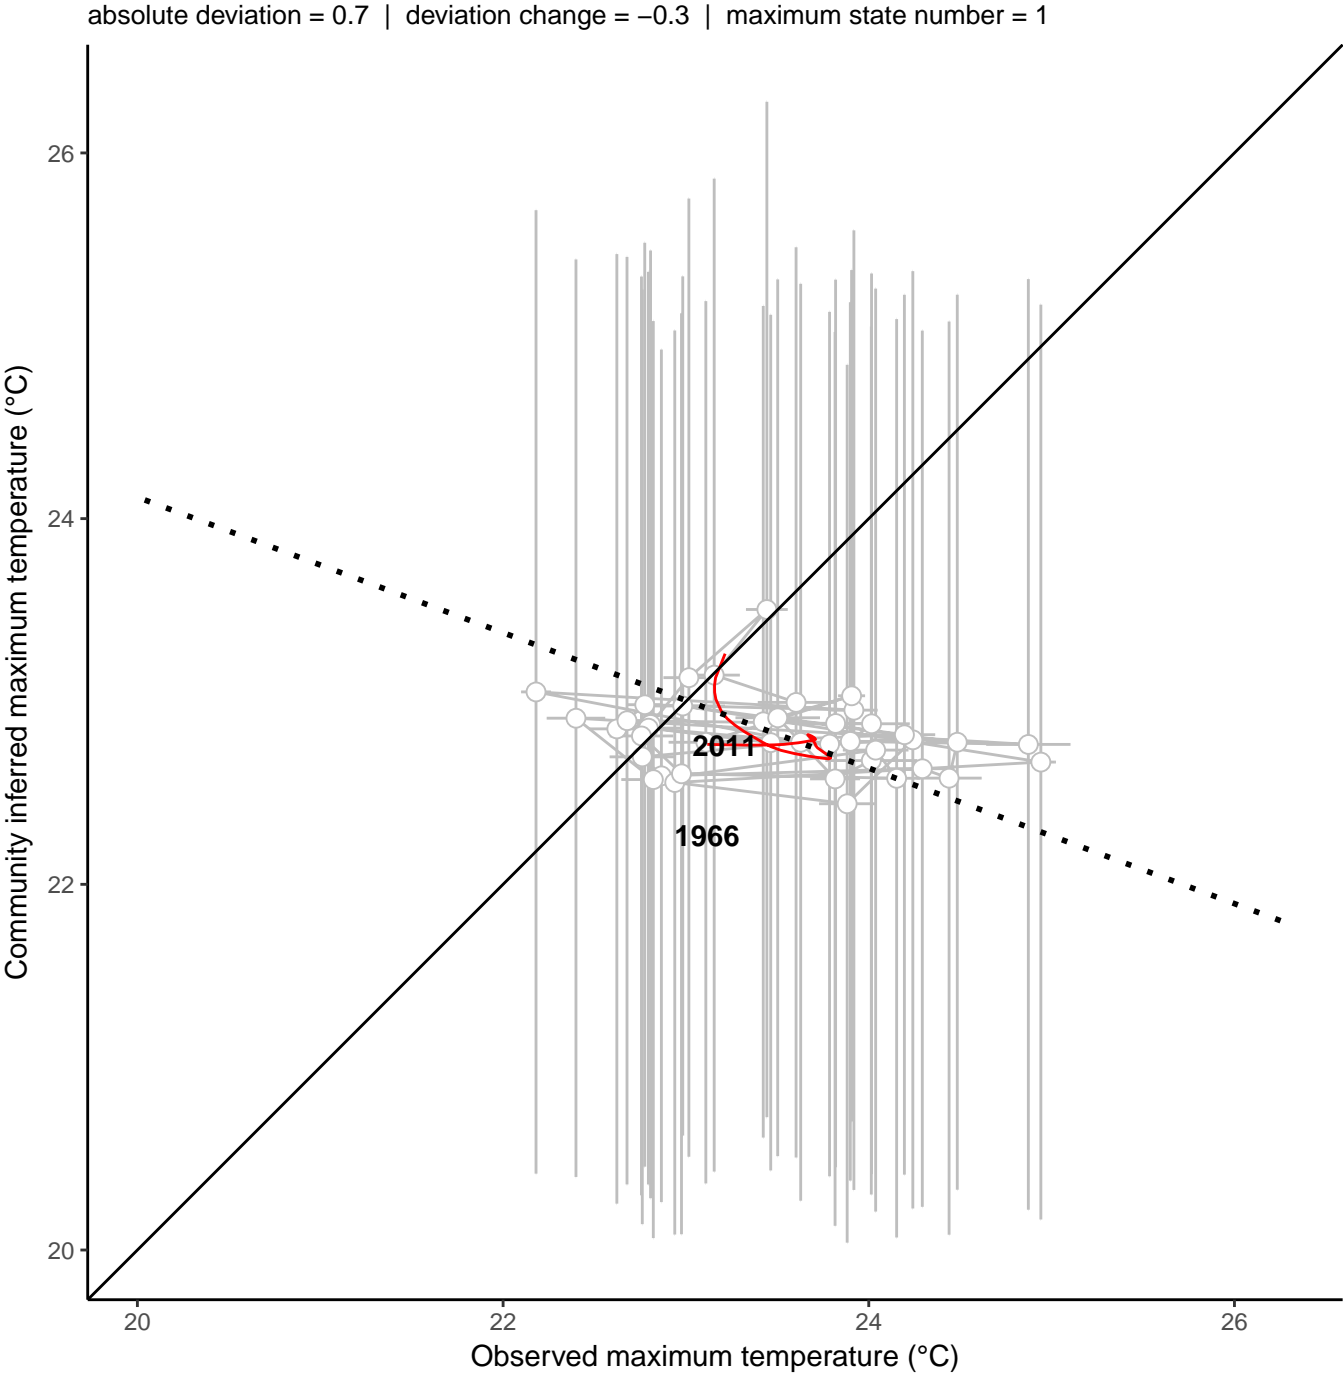

site : 840\_53\_32

absolute deviation = 2.76 | deviation change = 1.15 | maximum state number = 1

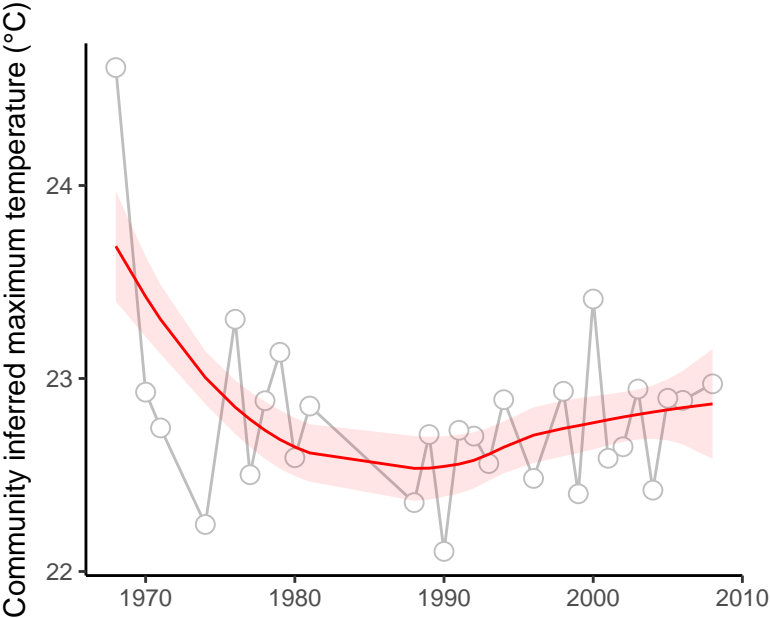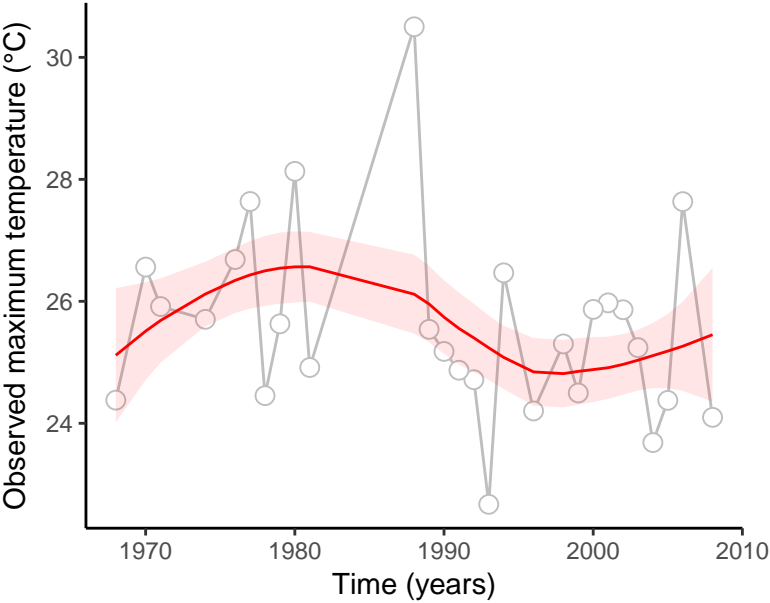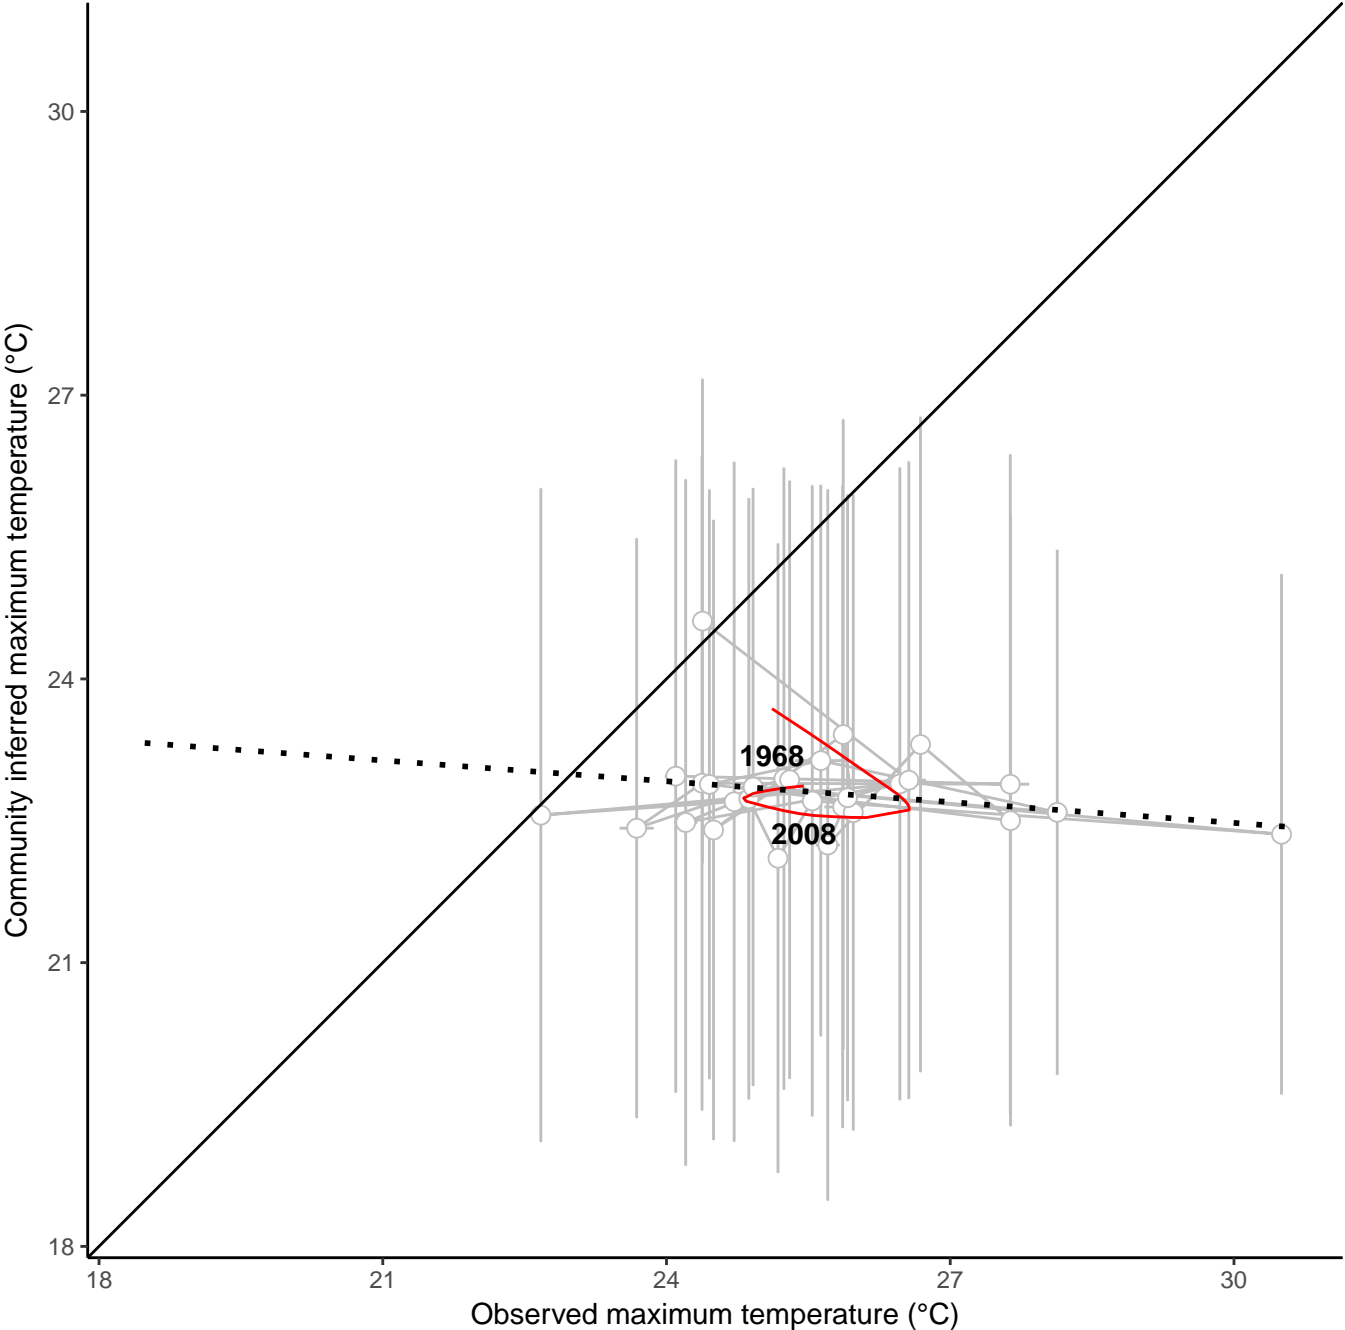

site : 840\_72\_22

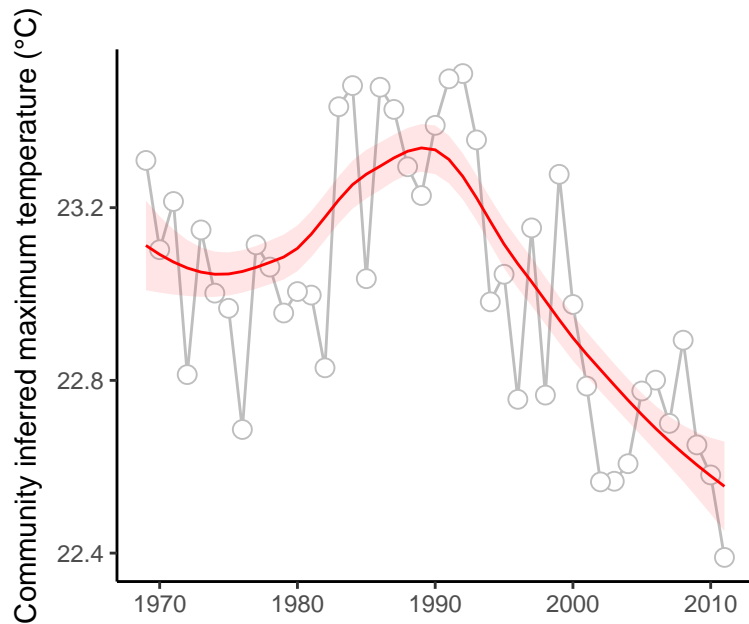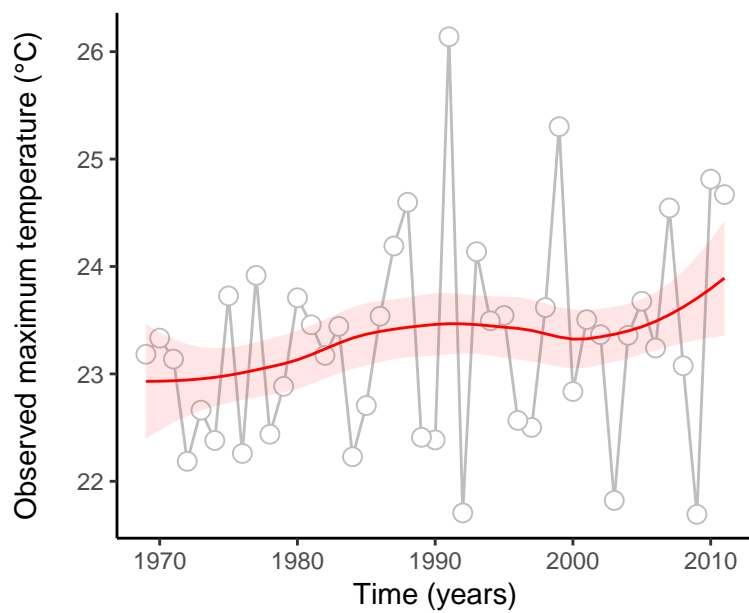

absolute deviation = 0.29 | deviation change = 1.16 | maximum state number = 1

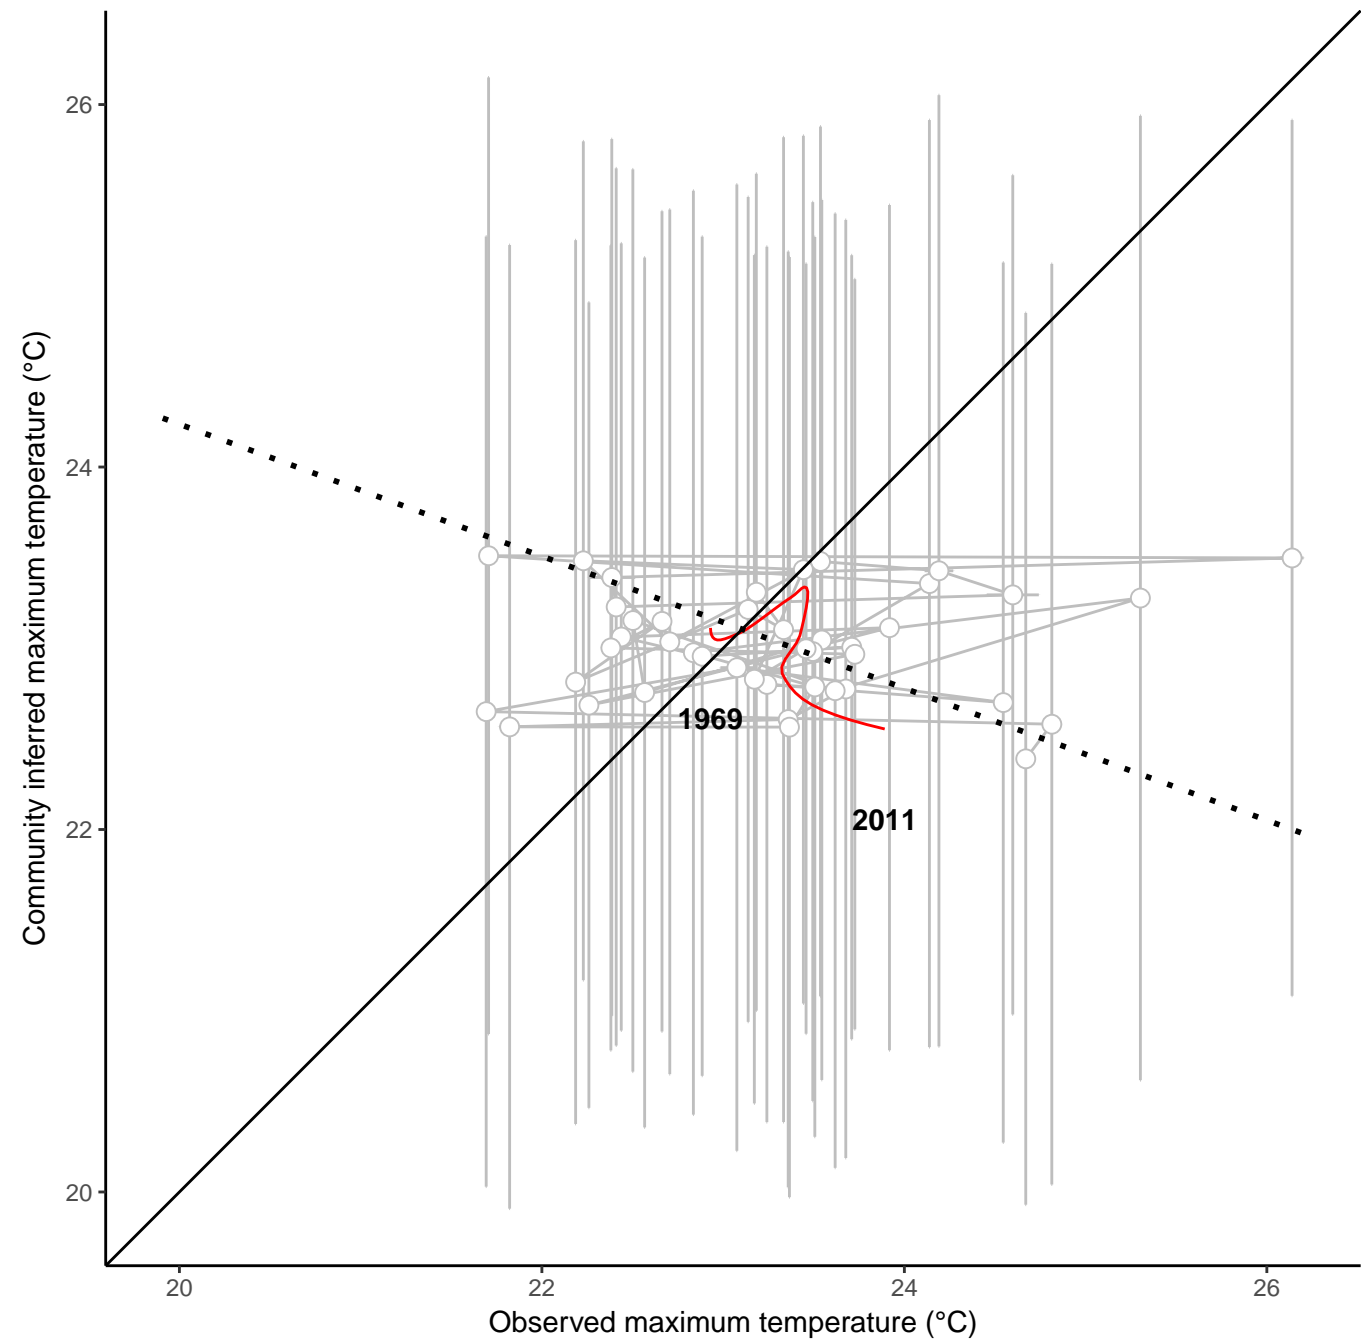

site : 840\_83\_70

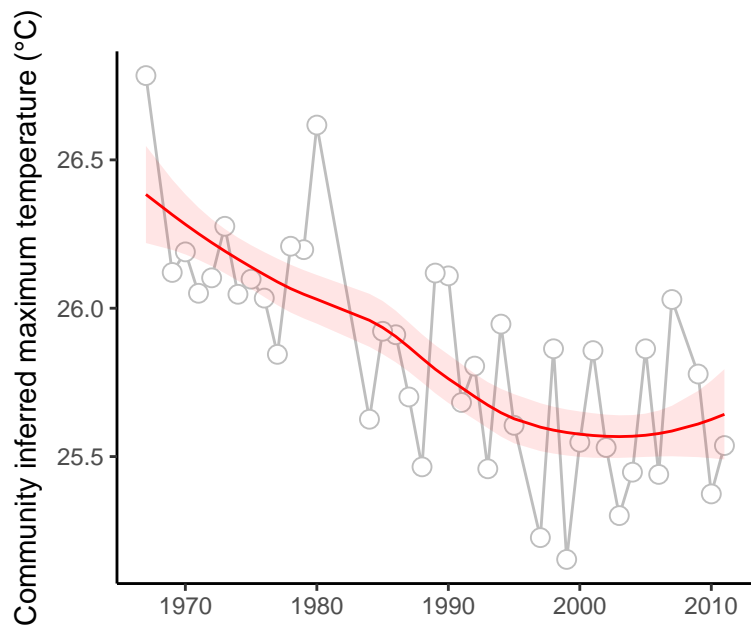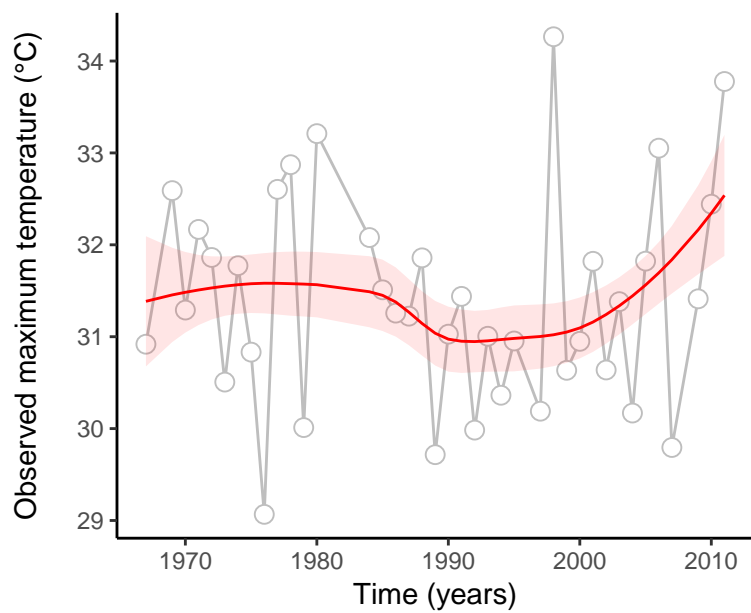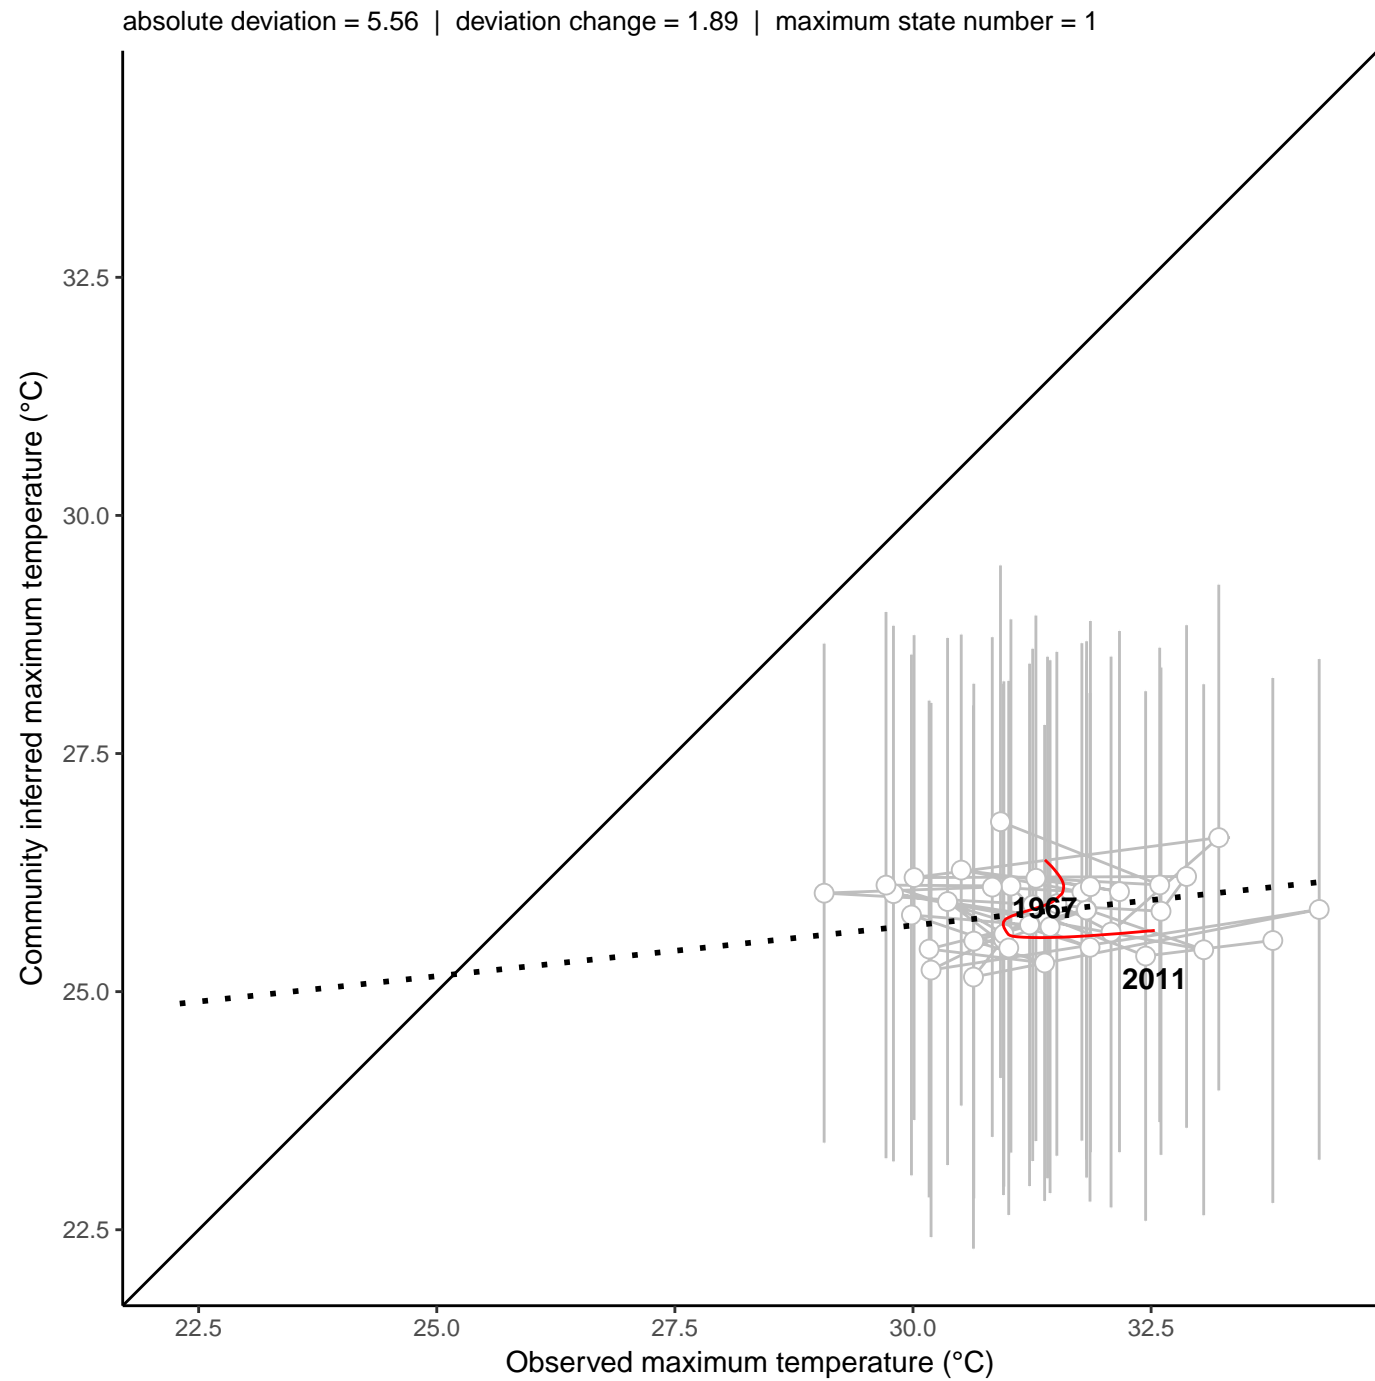

site : 840\_85\_11

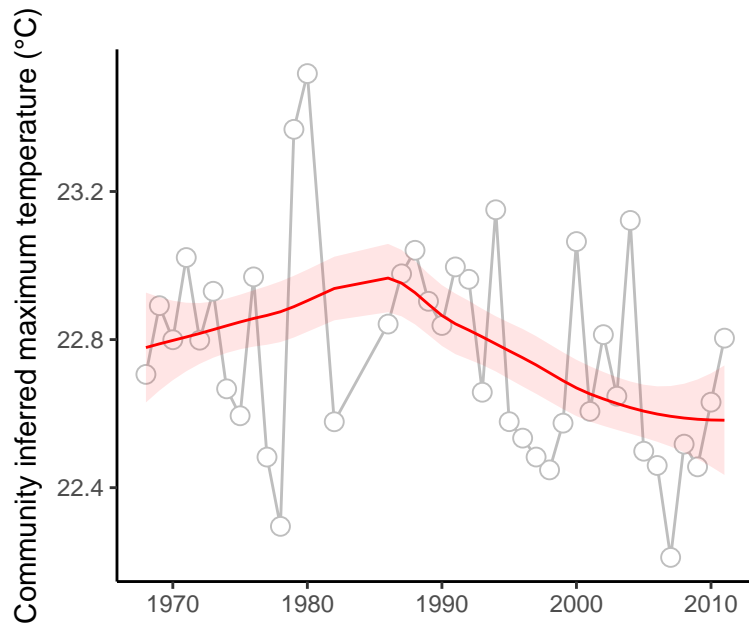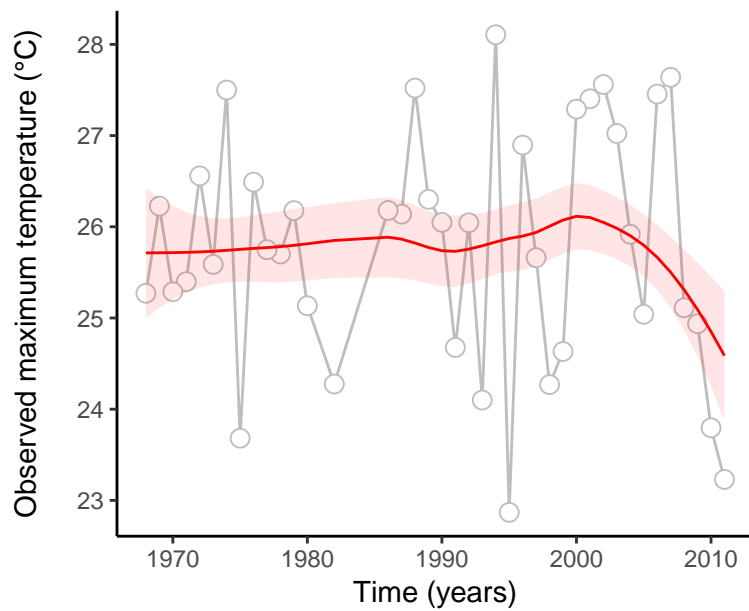

absolute deviation = 2.97 | deviation change = -0.93 | maximum state number = 1

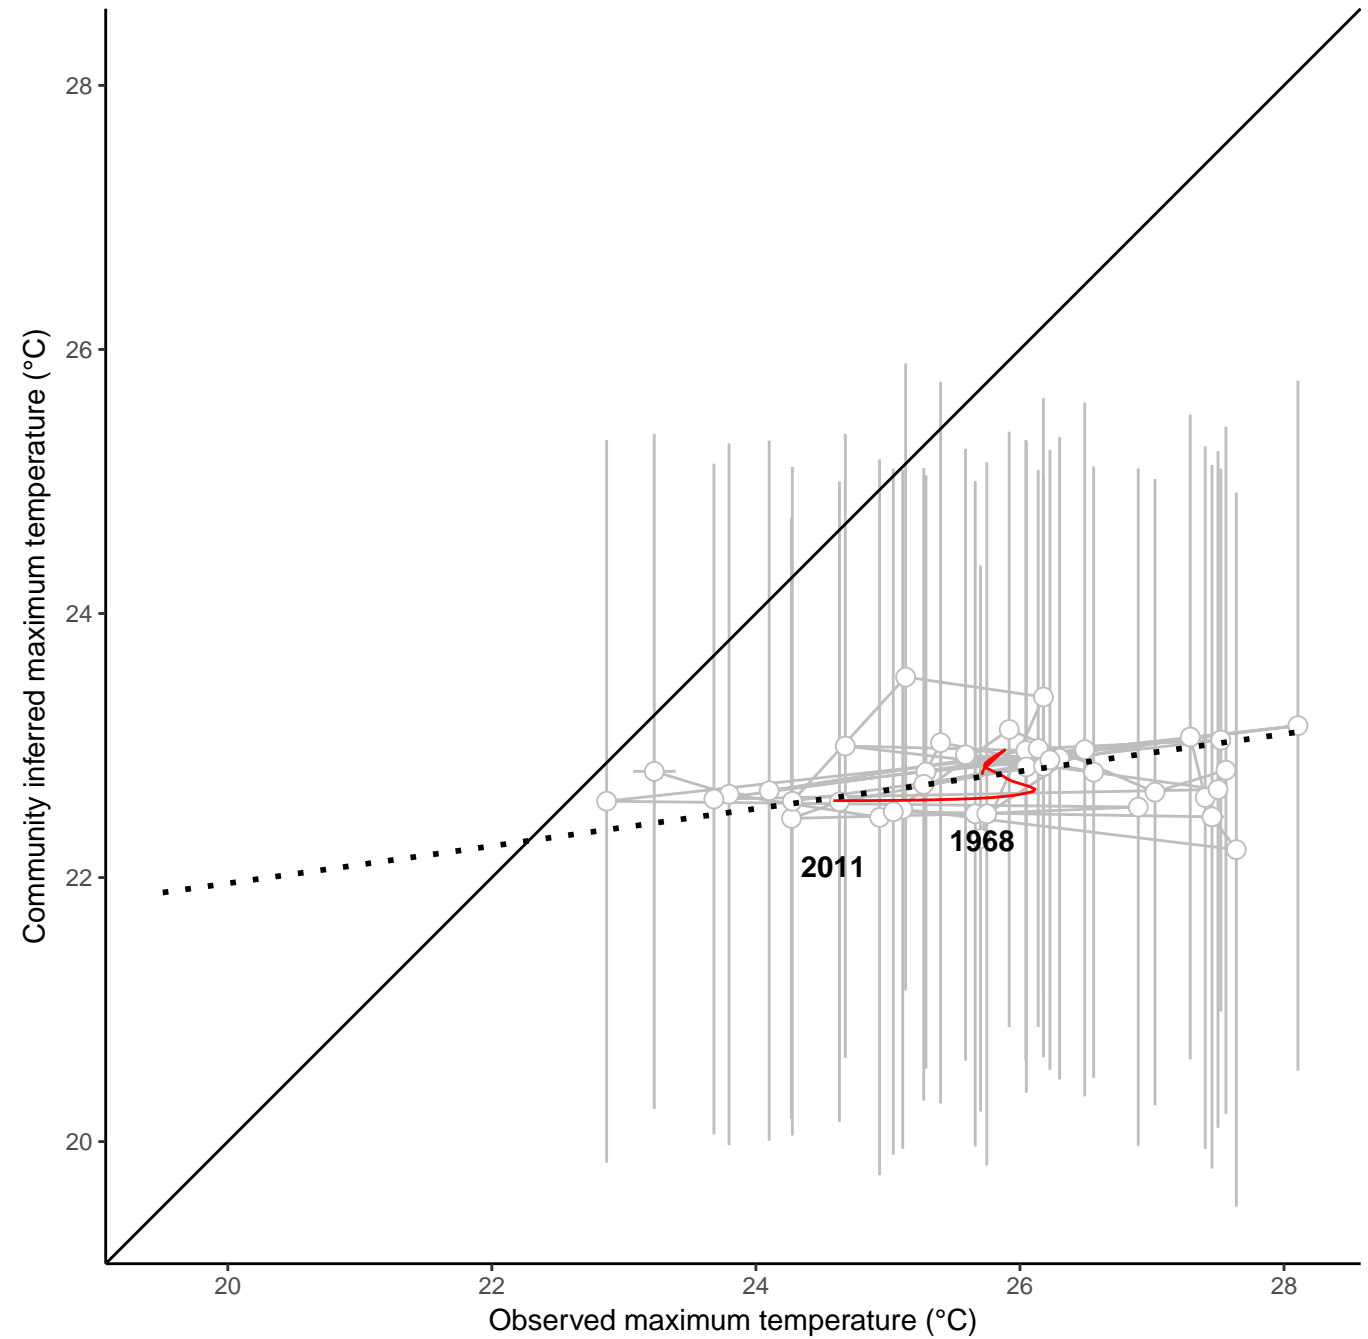

site : 840\_72\_78

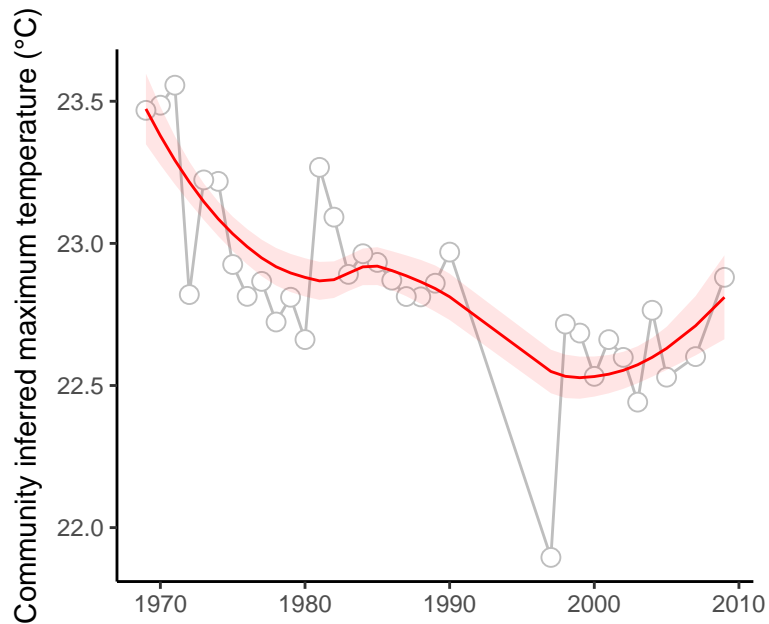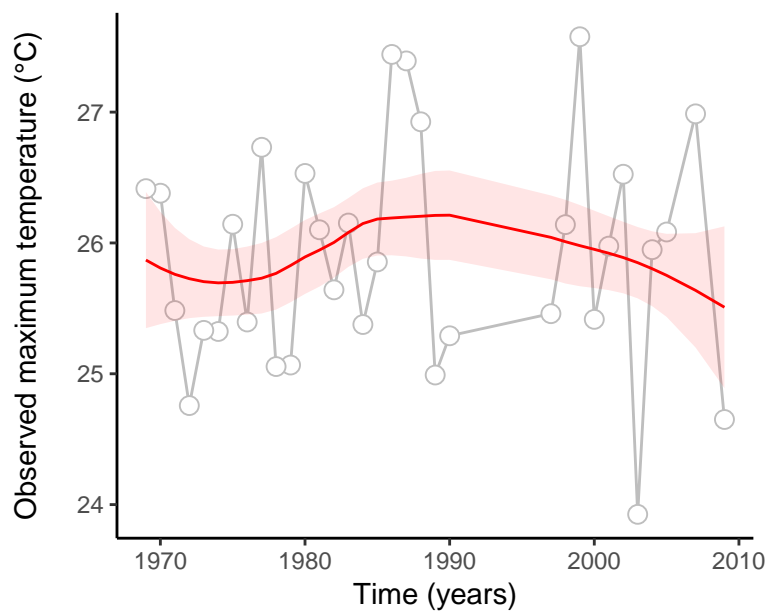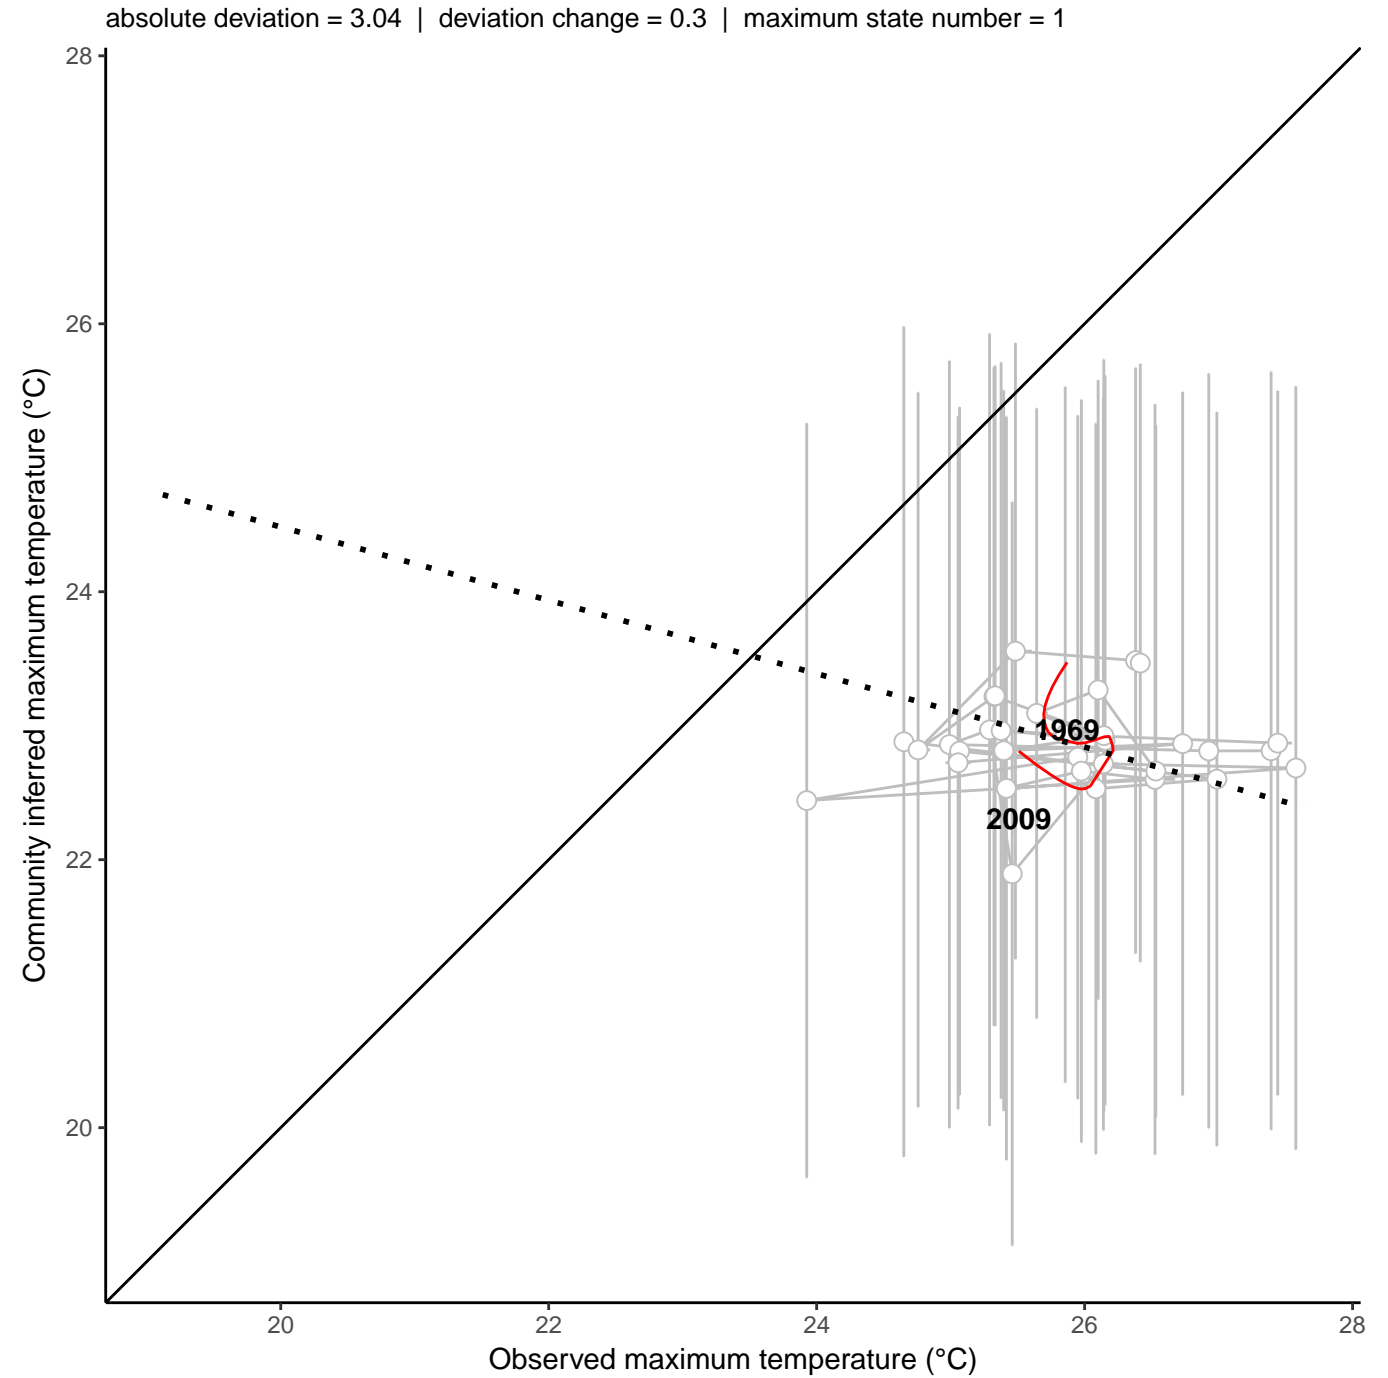



site : 840\_67\_27

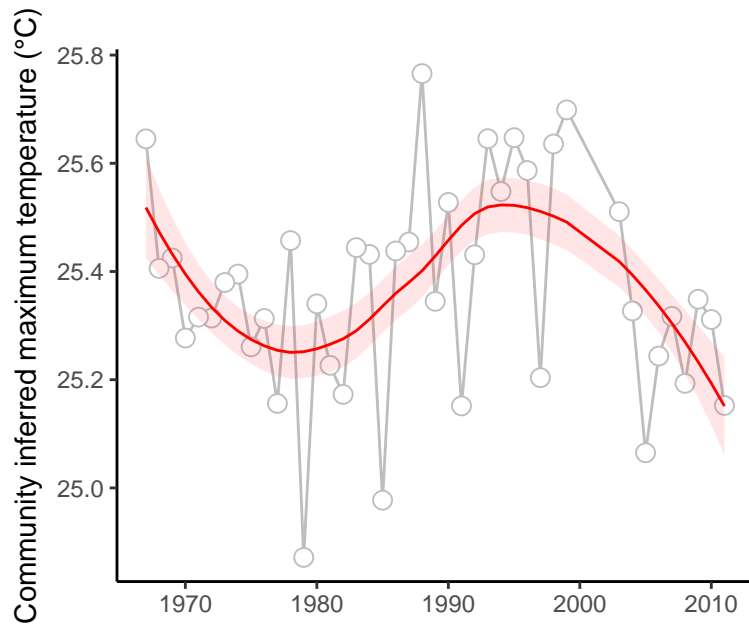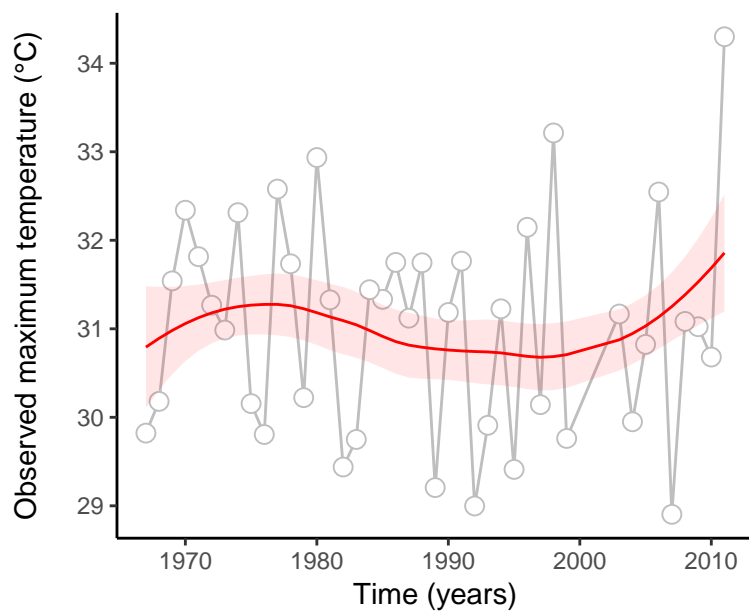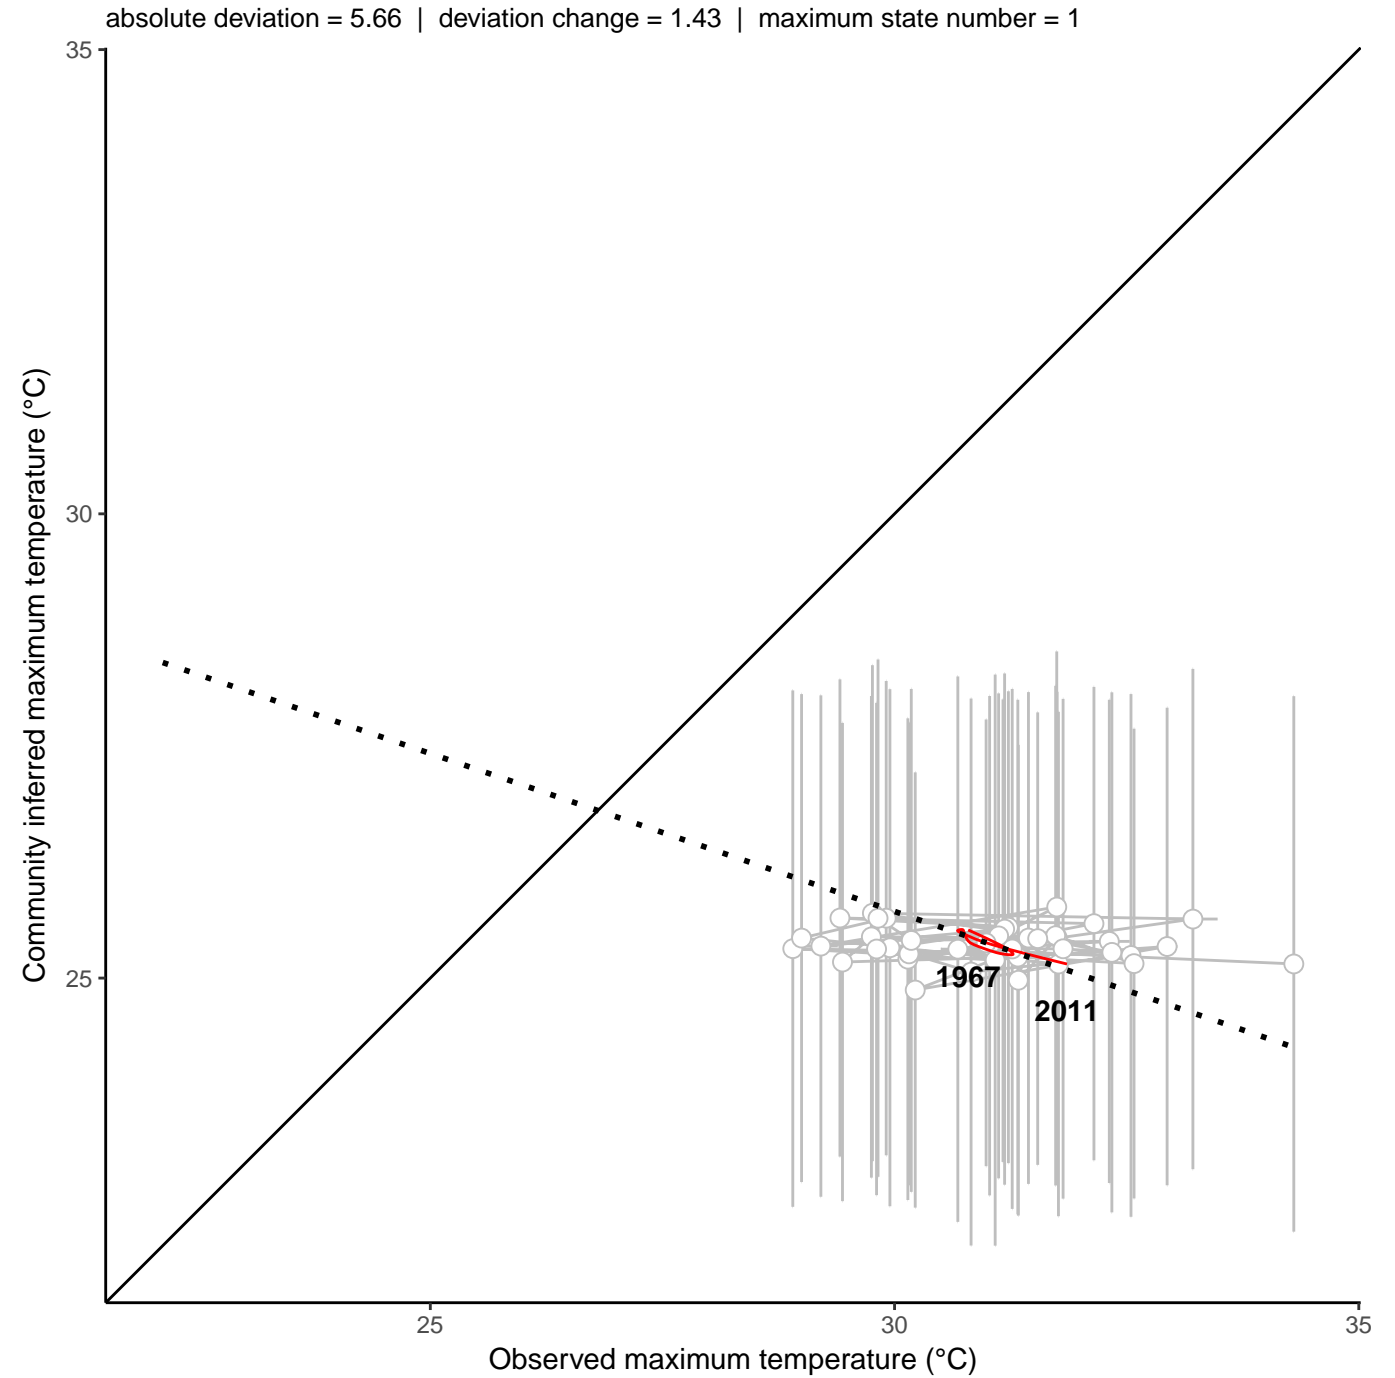

site : 840\_14\_3

absolute deviation = 1.09 | deviation change = 1.22 | maximum state number = 1

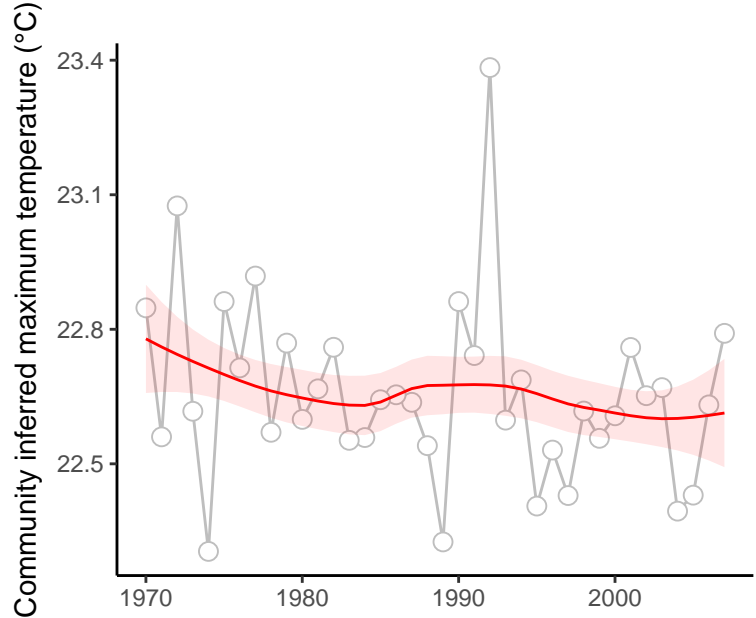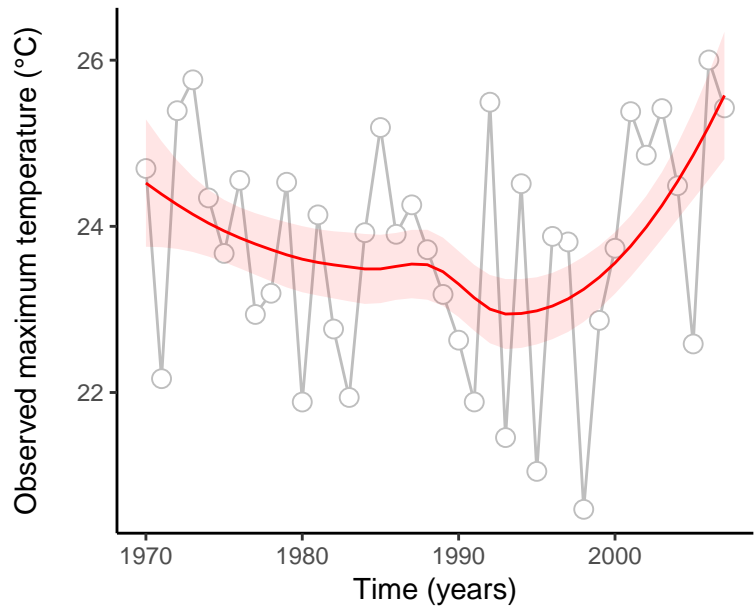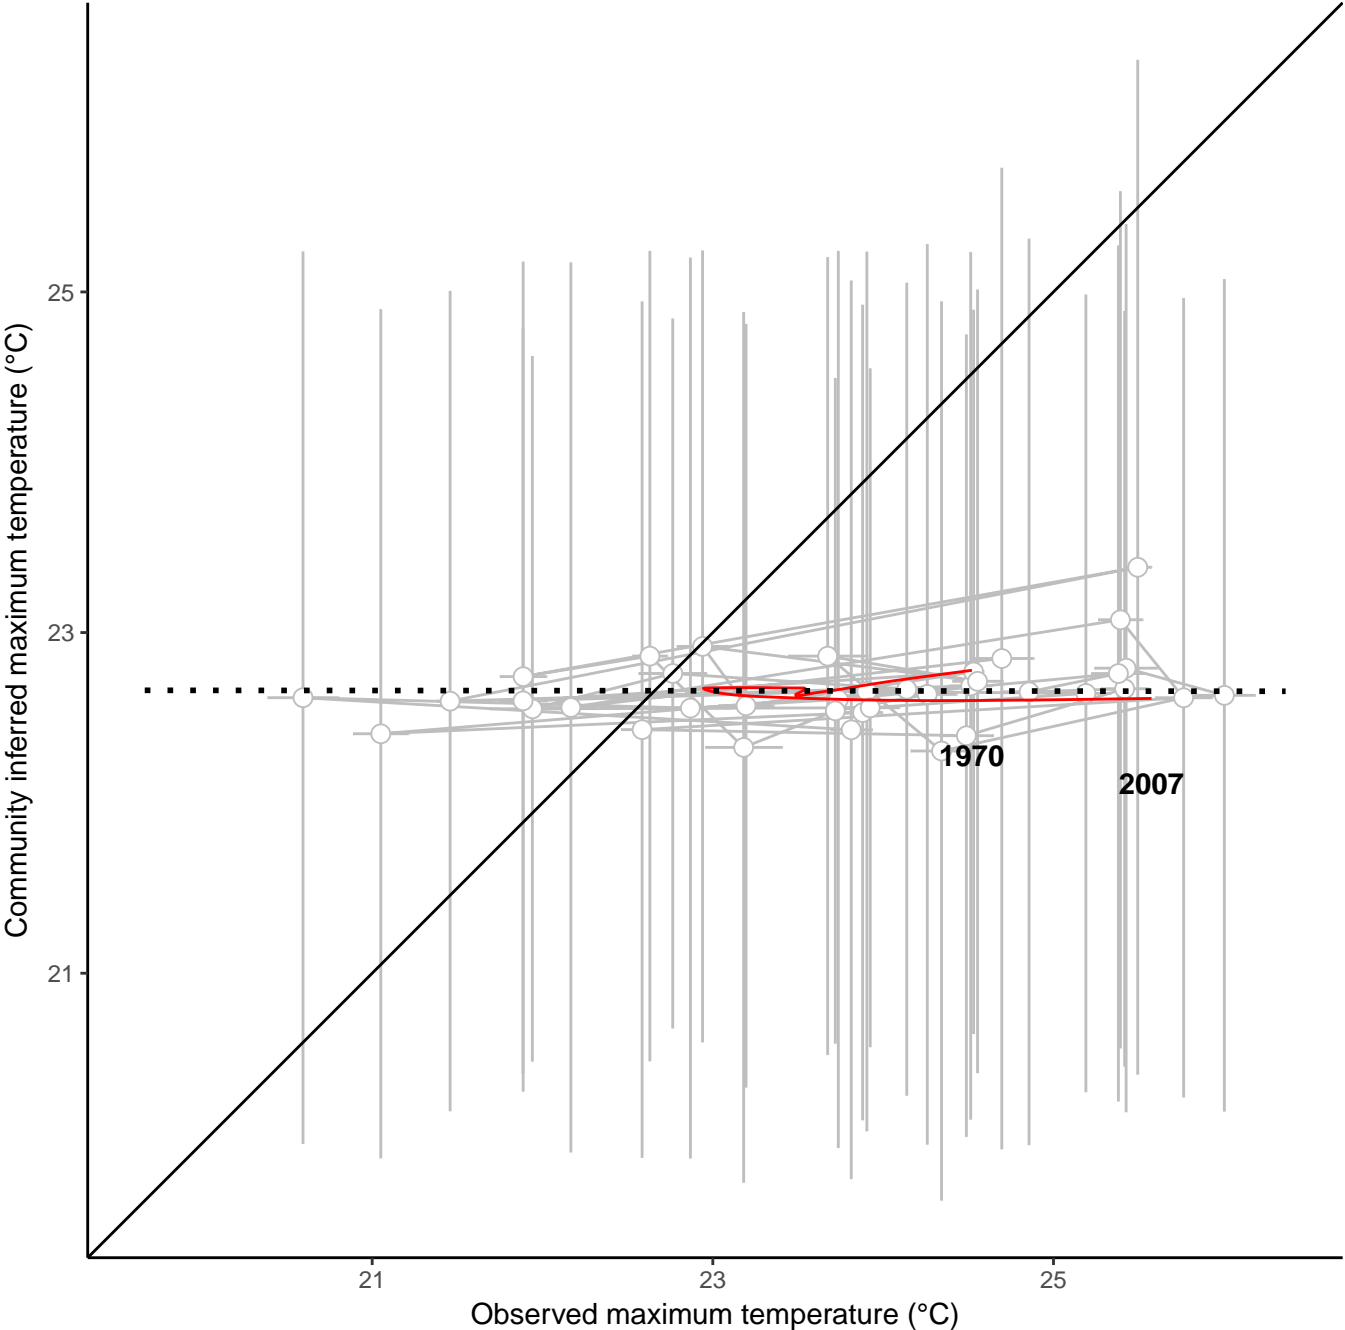

site : 840\_69\_1

absolute deviation = 1.11 | deviation change = -1.32 | maximum state number = 1

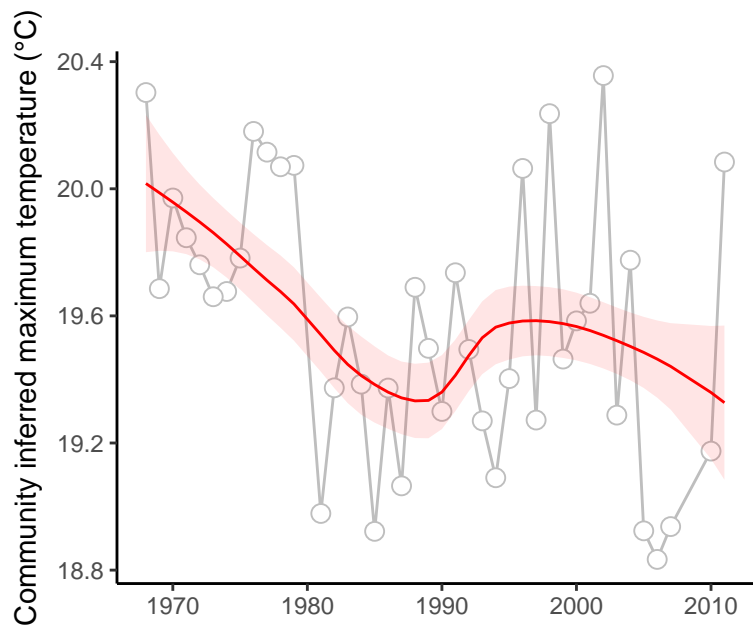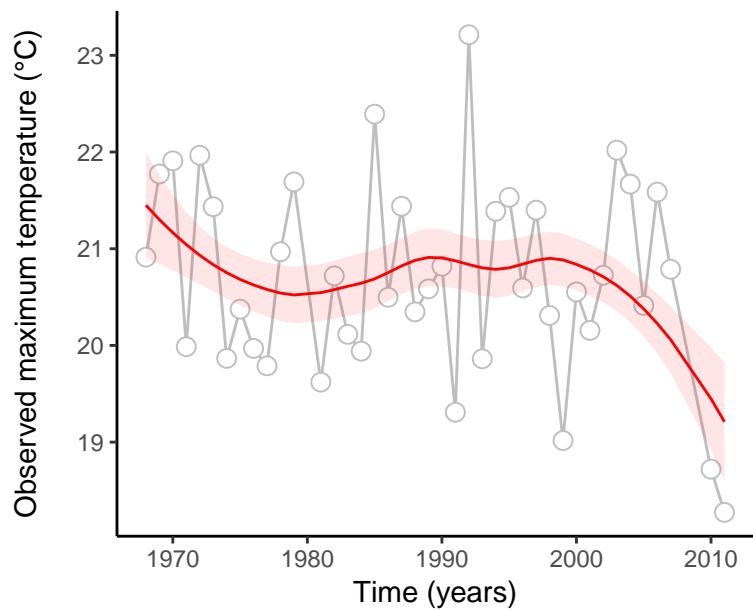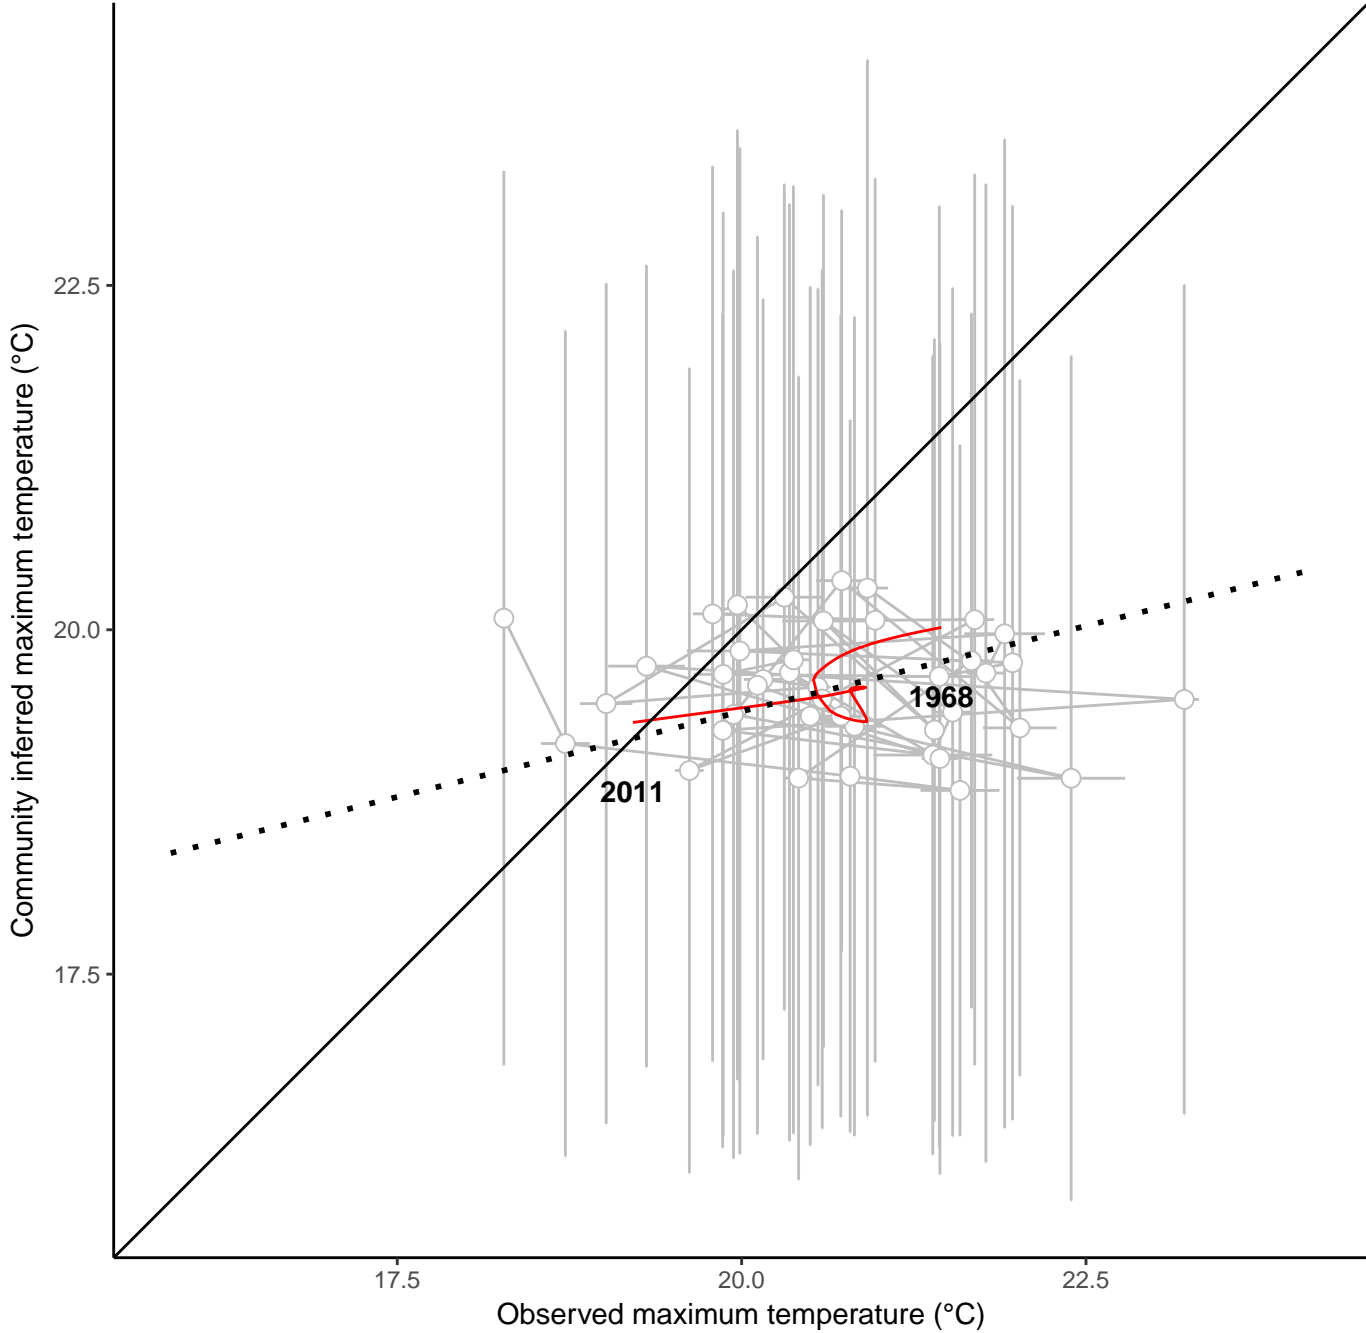

site : 840\_34\_28

absolute deviation = 3.69 | deviation change = 1.8 | maximum state number = 2

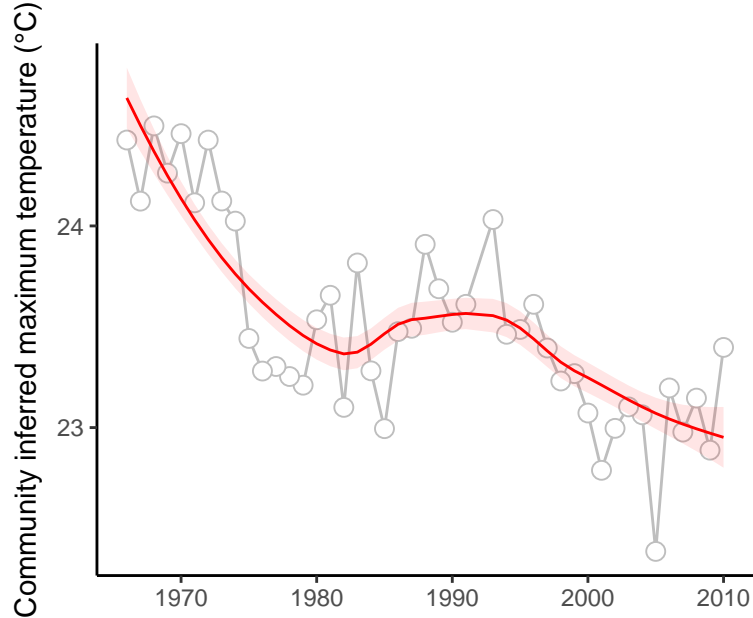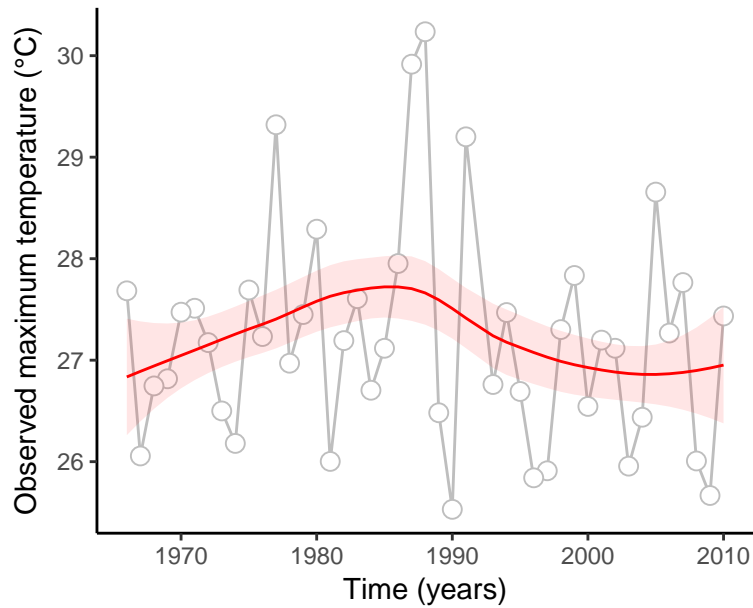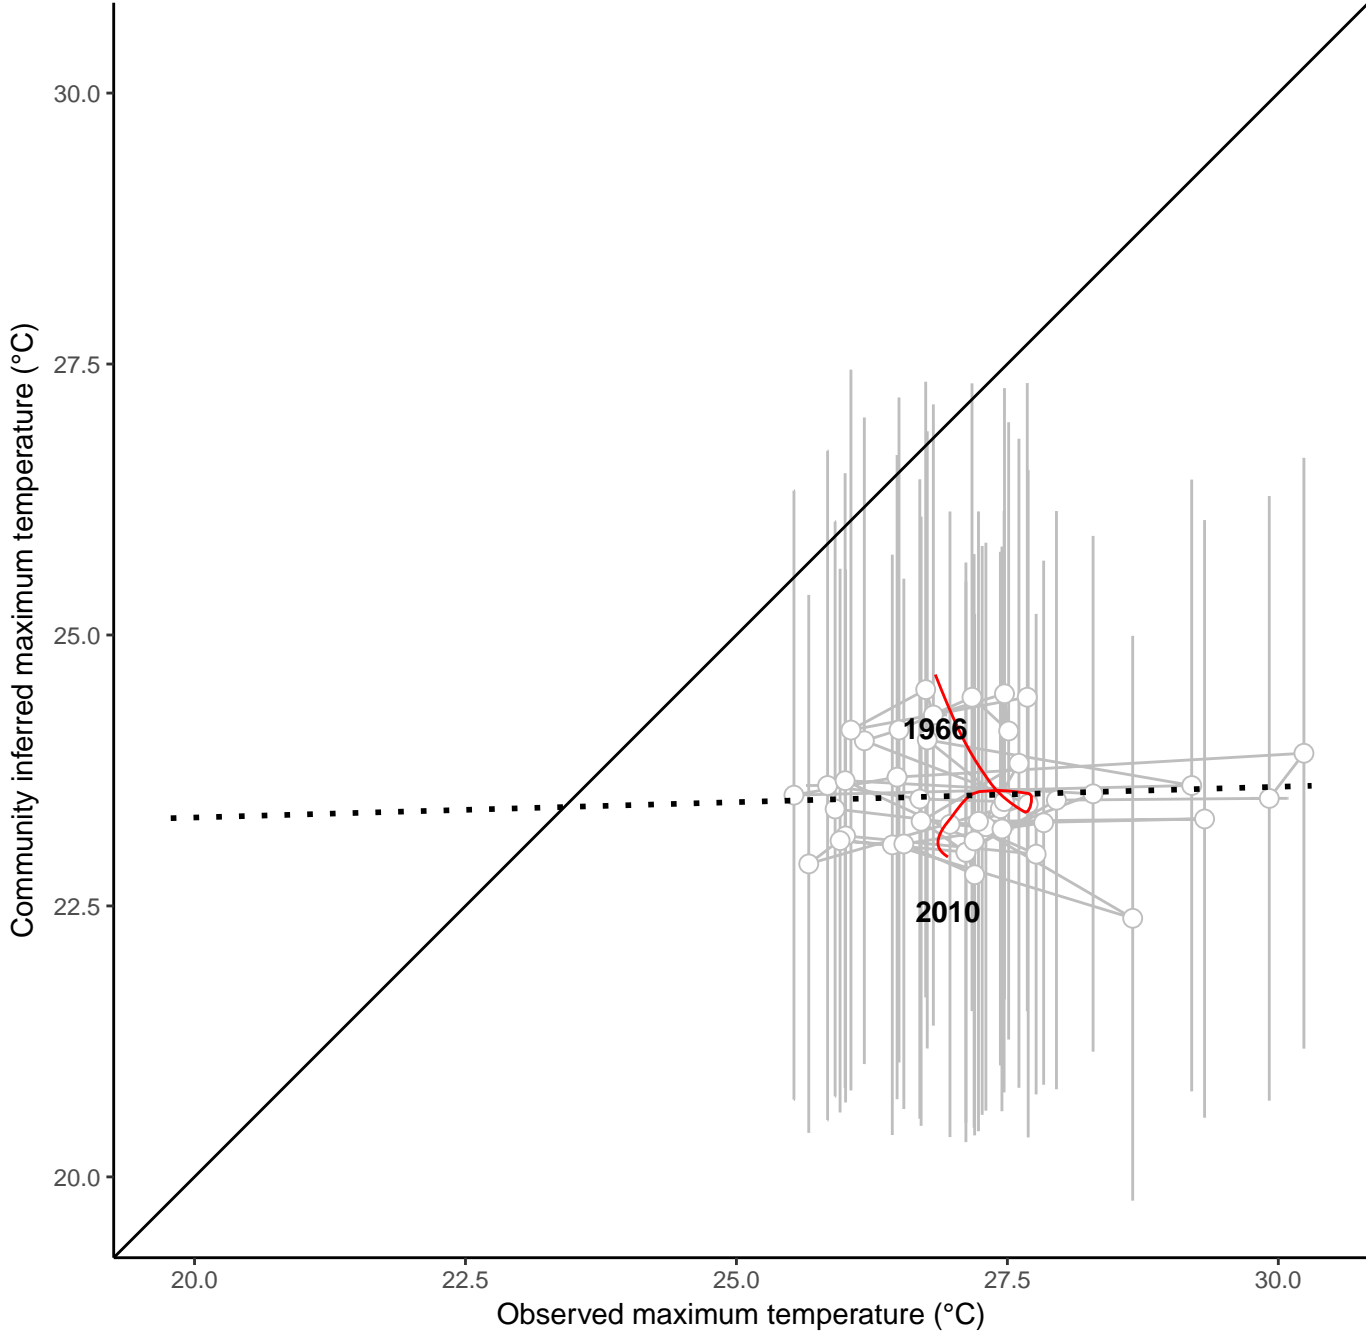

site : 840\_38\_23

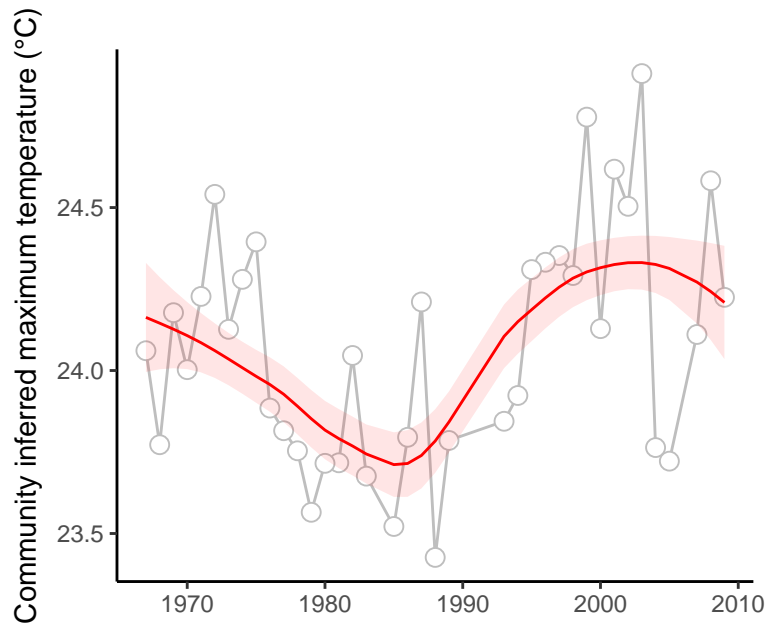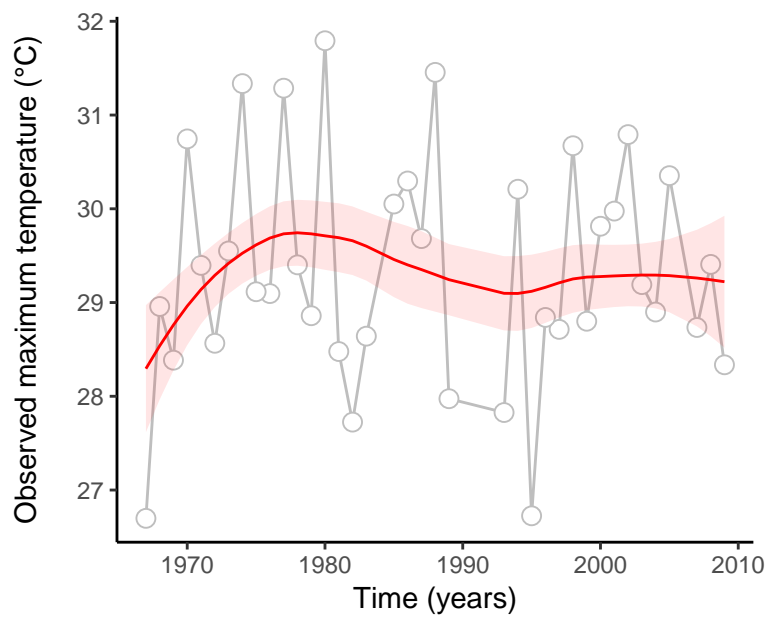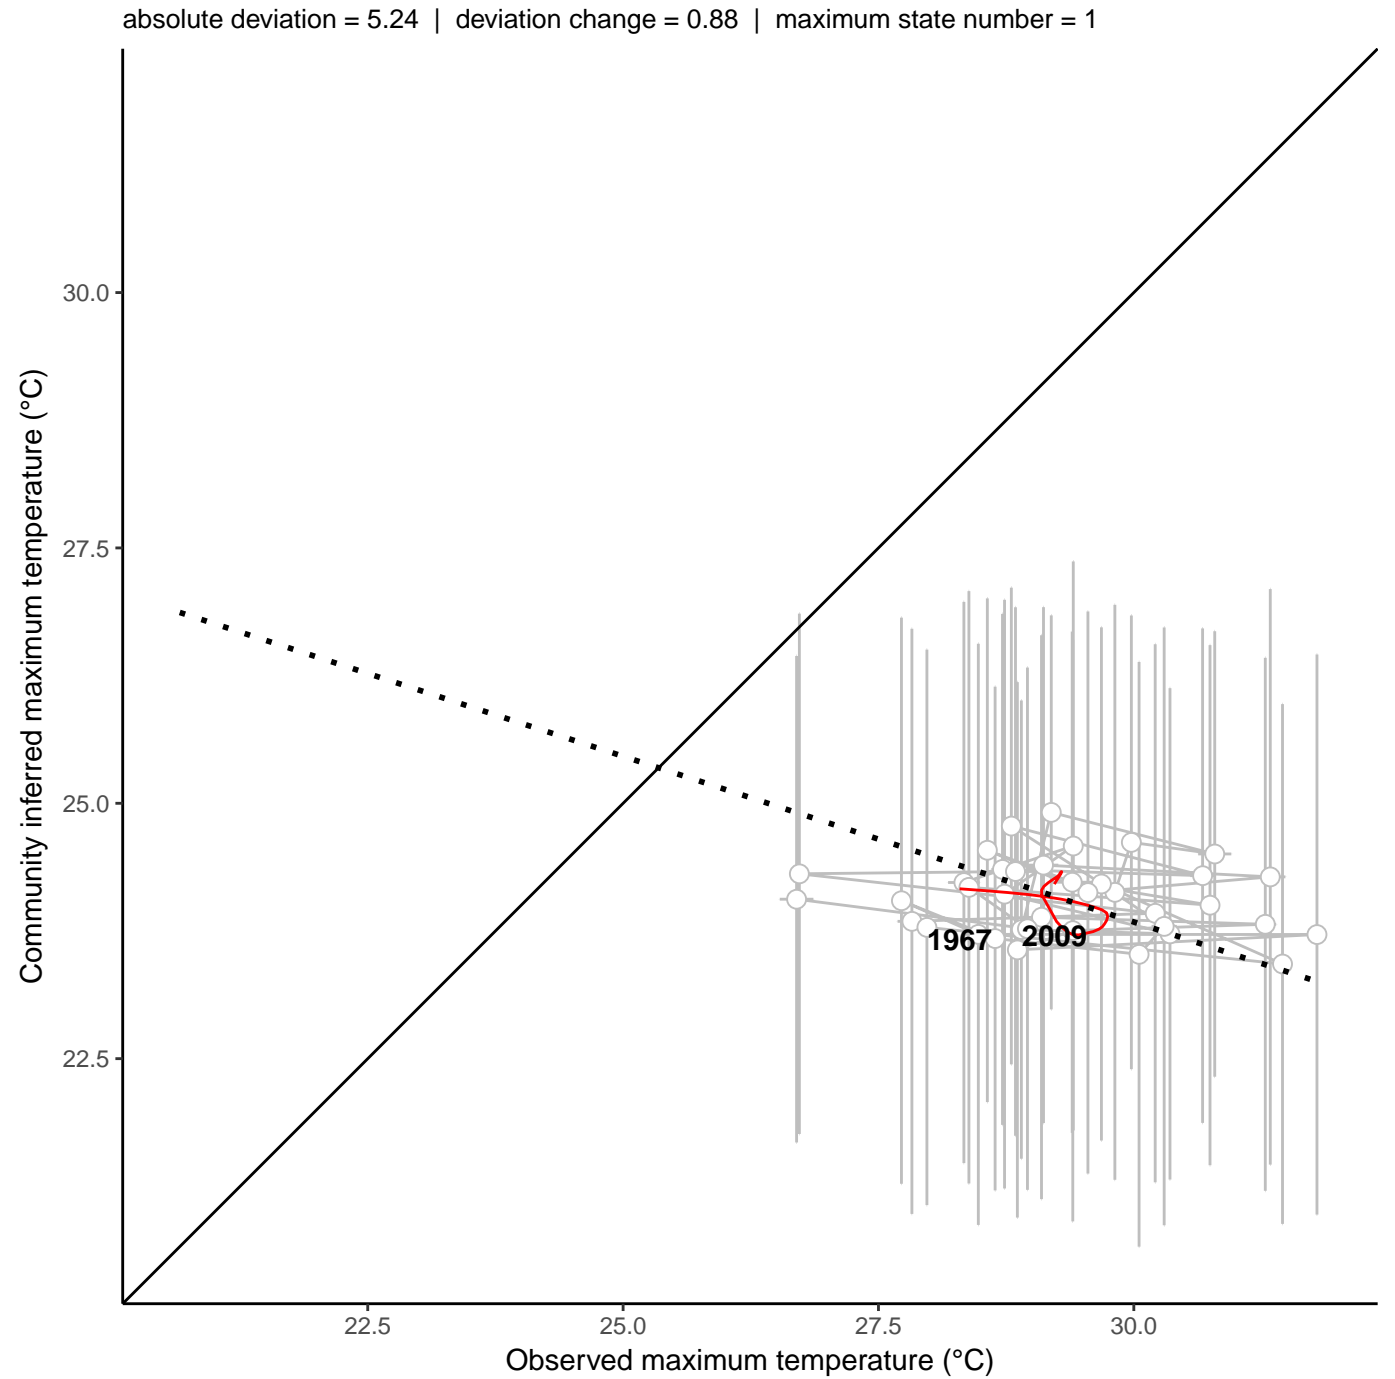

site : 840\_61\_53

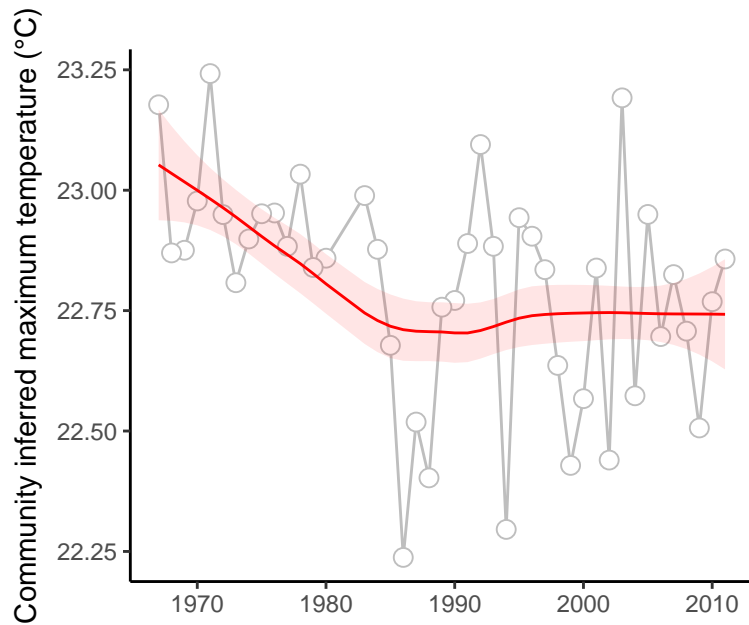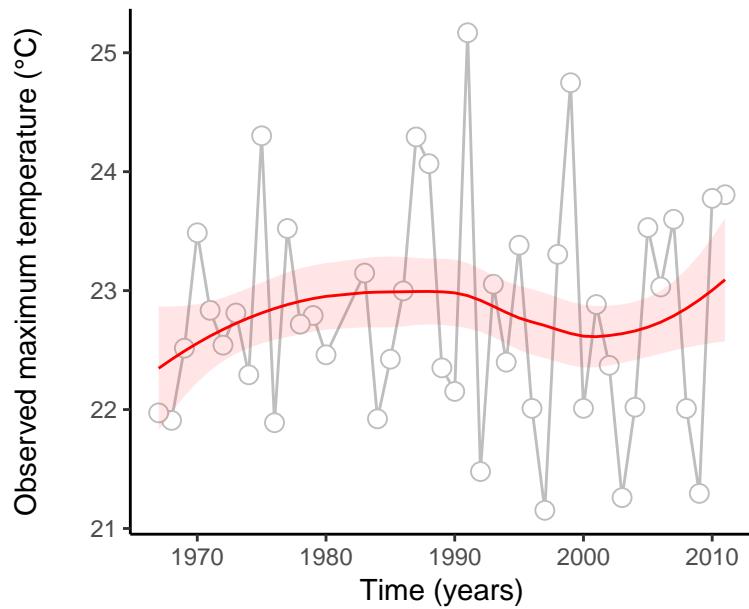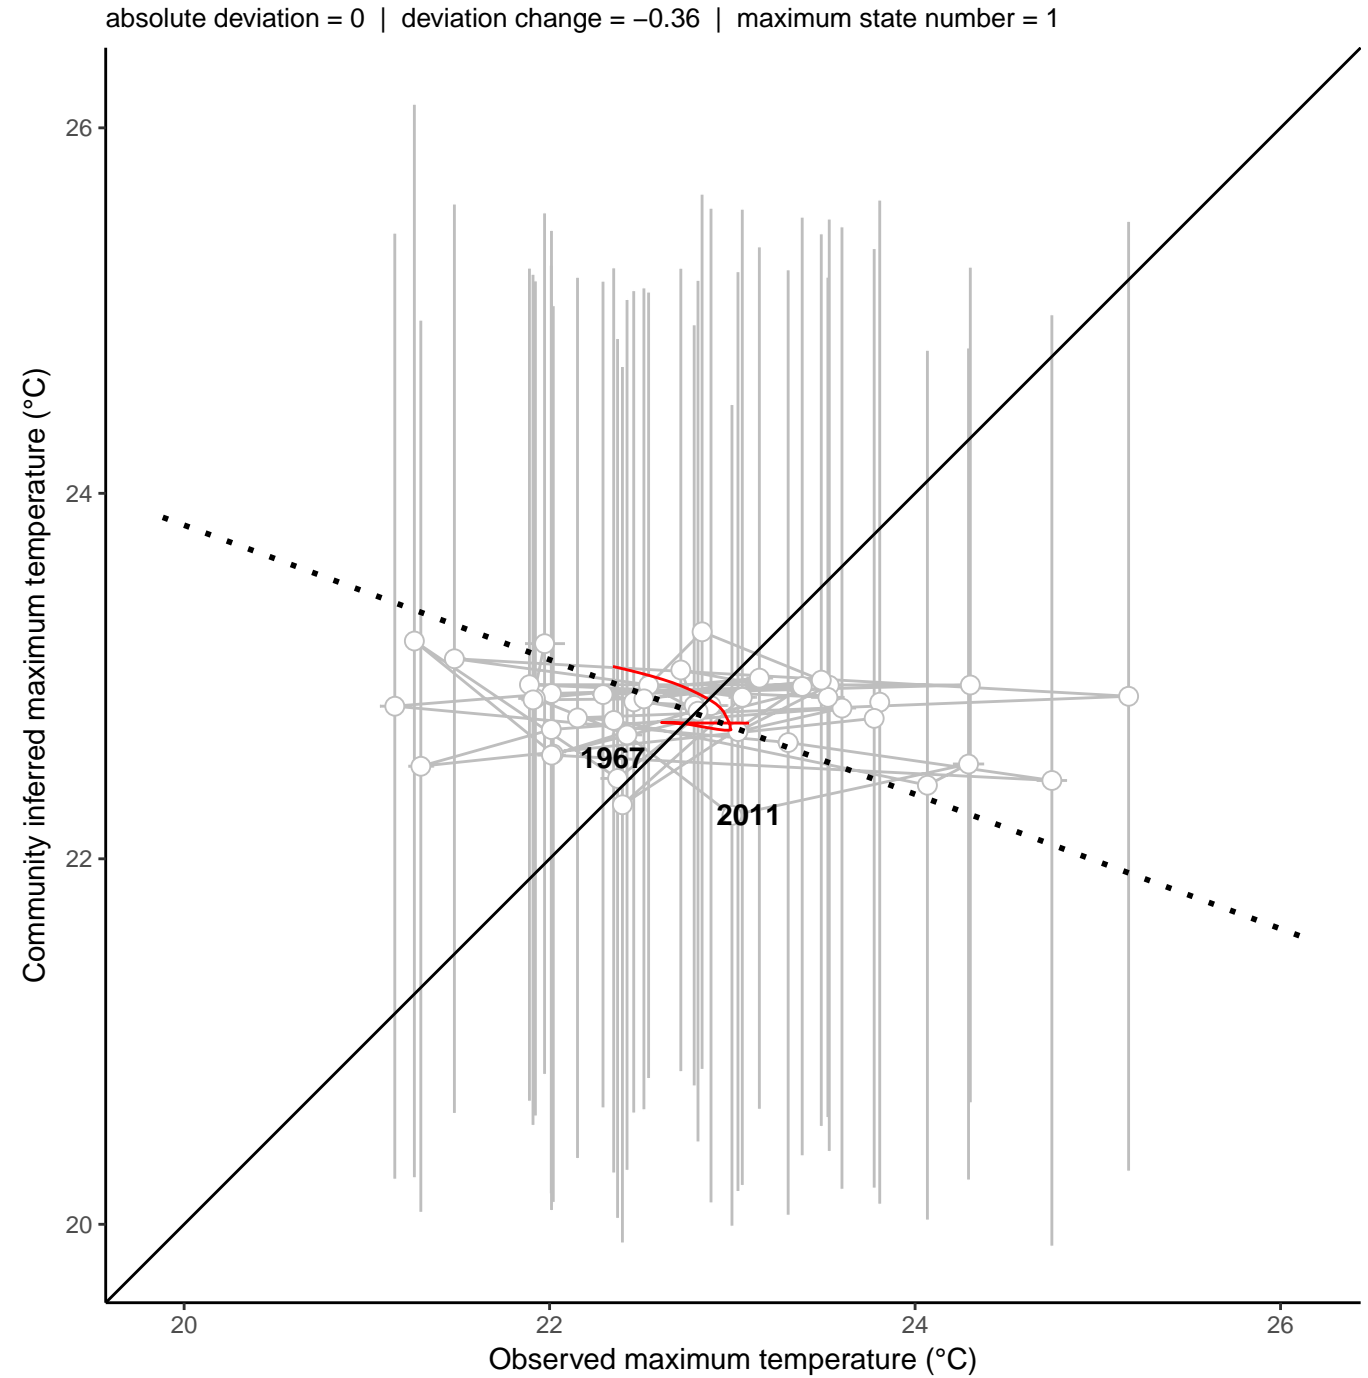

site : 840\_83\_76

absolute deviation = 6.43 | deviation change = 0.41 | maximum state number = 1

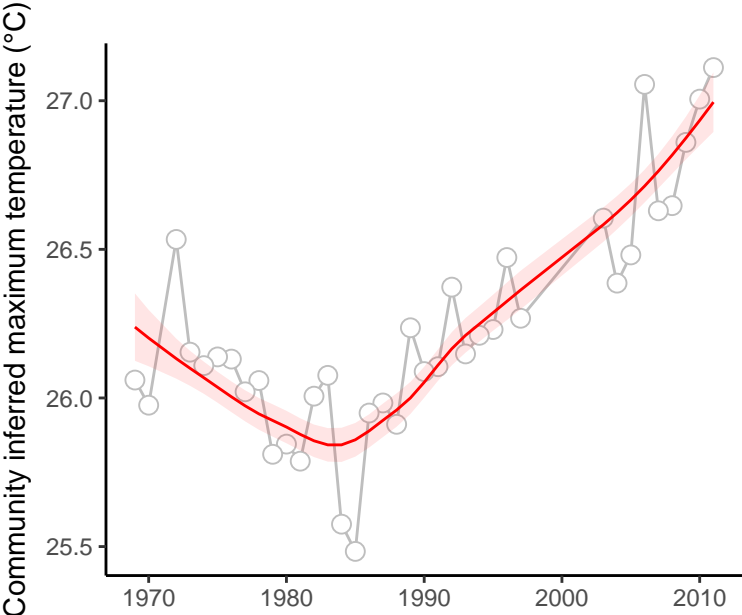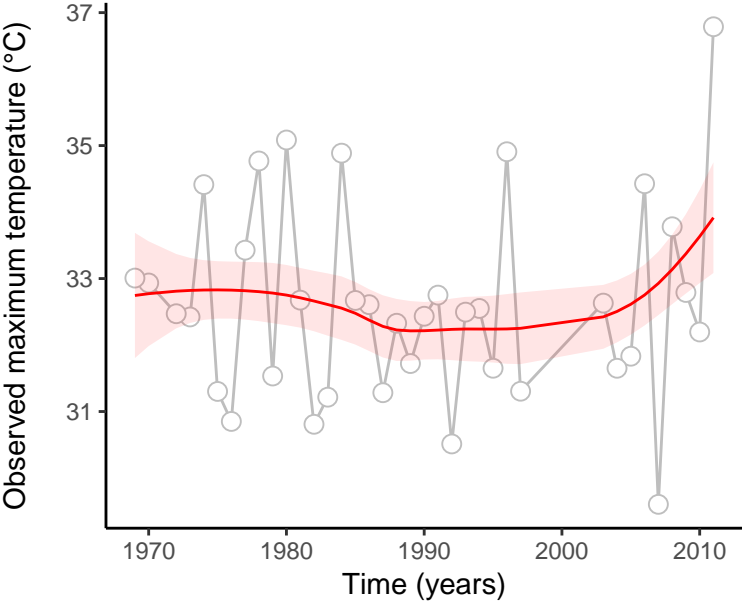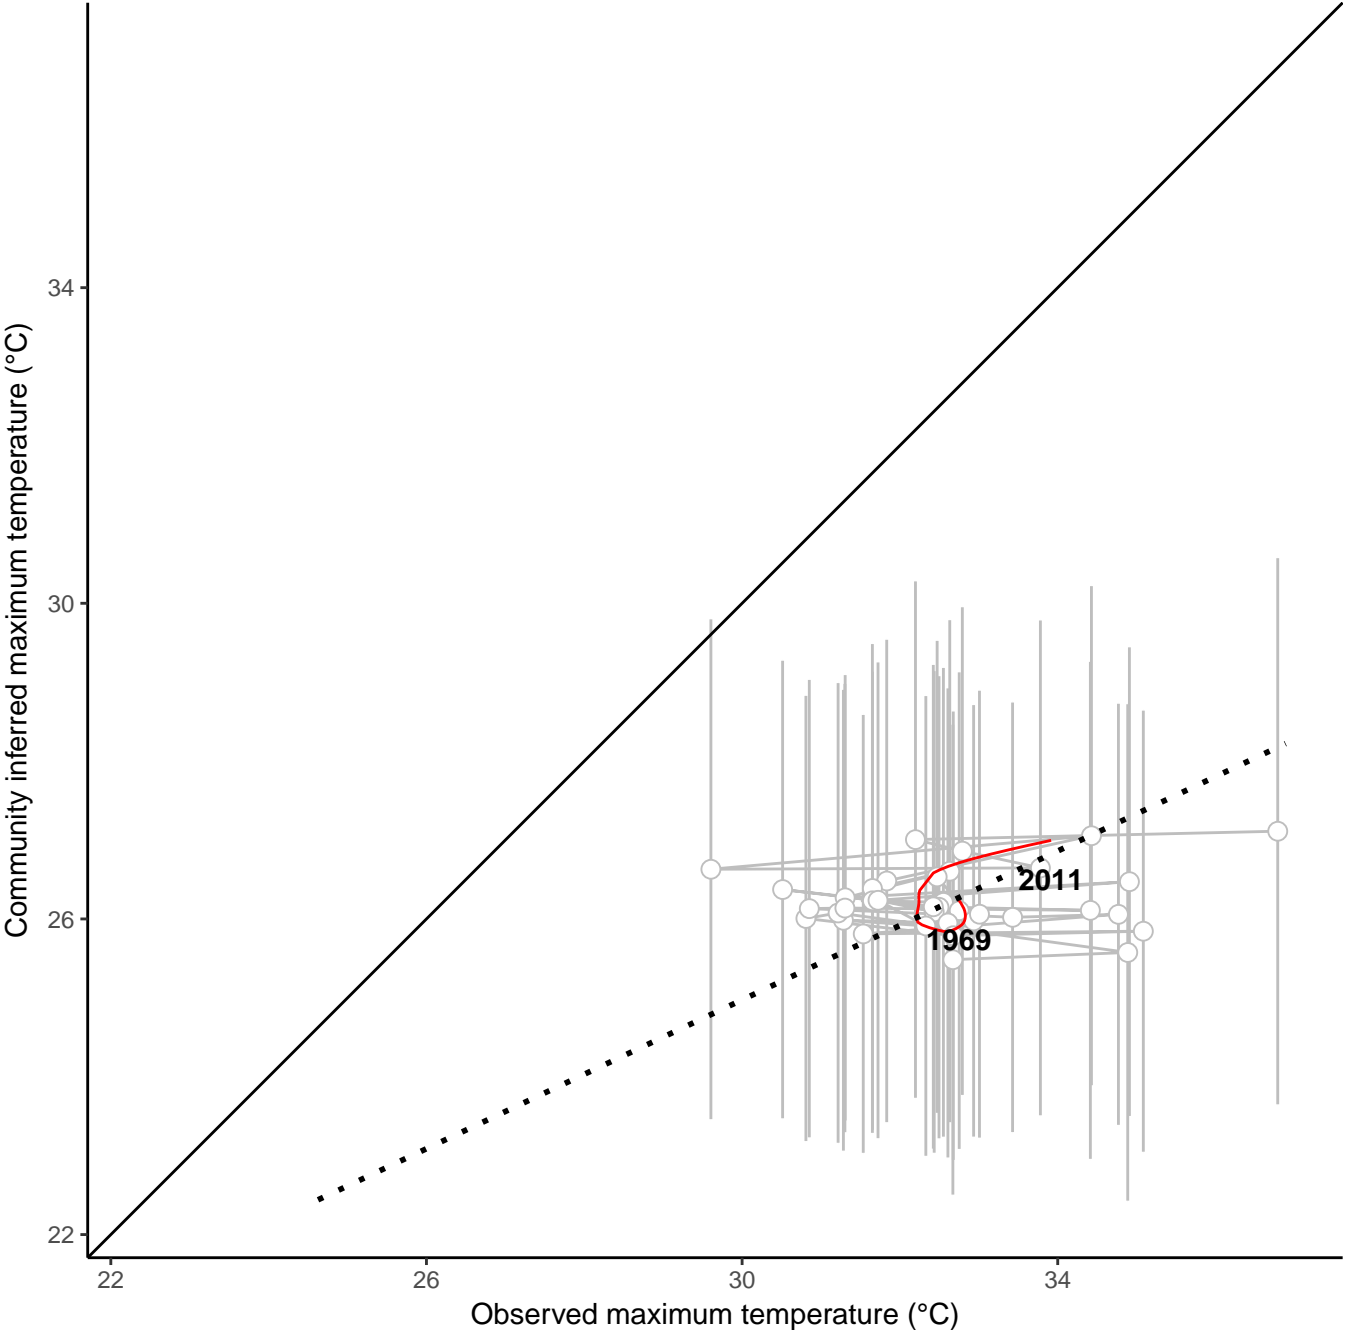

site : 840\_53\_41

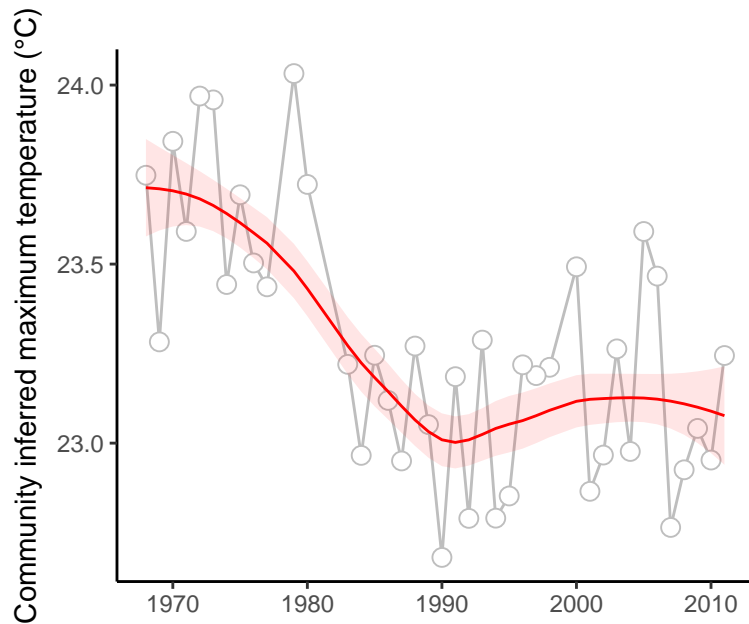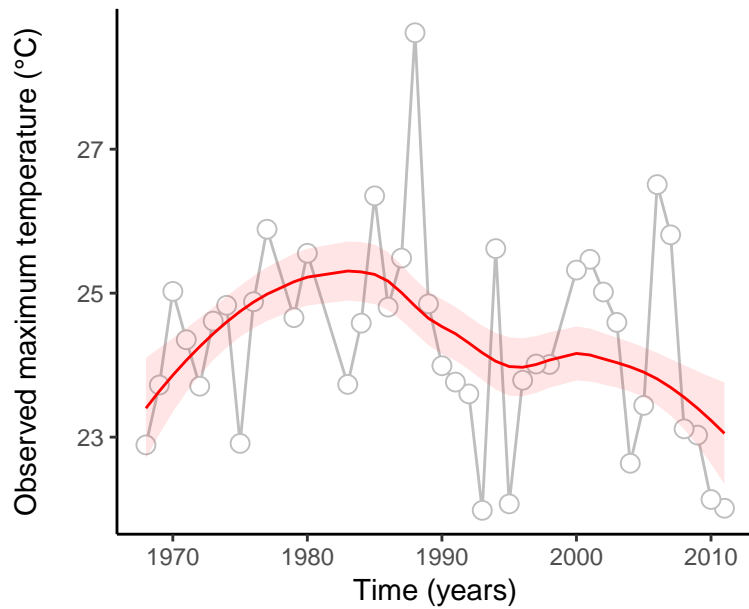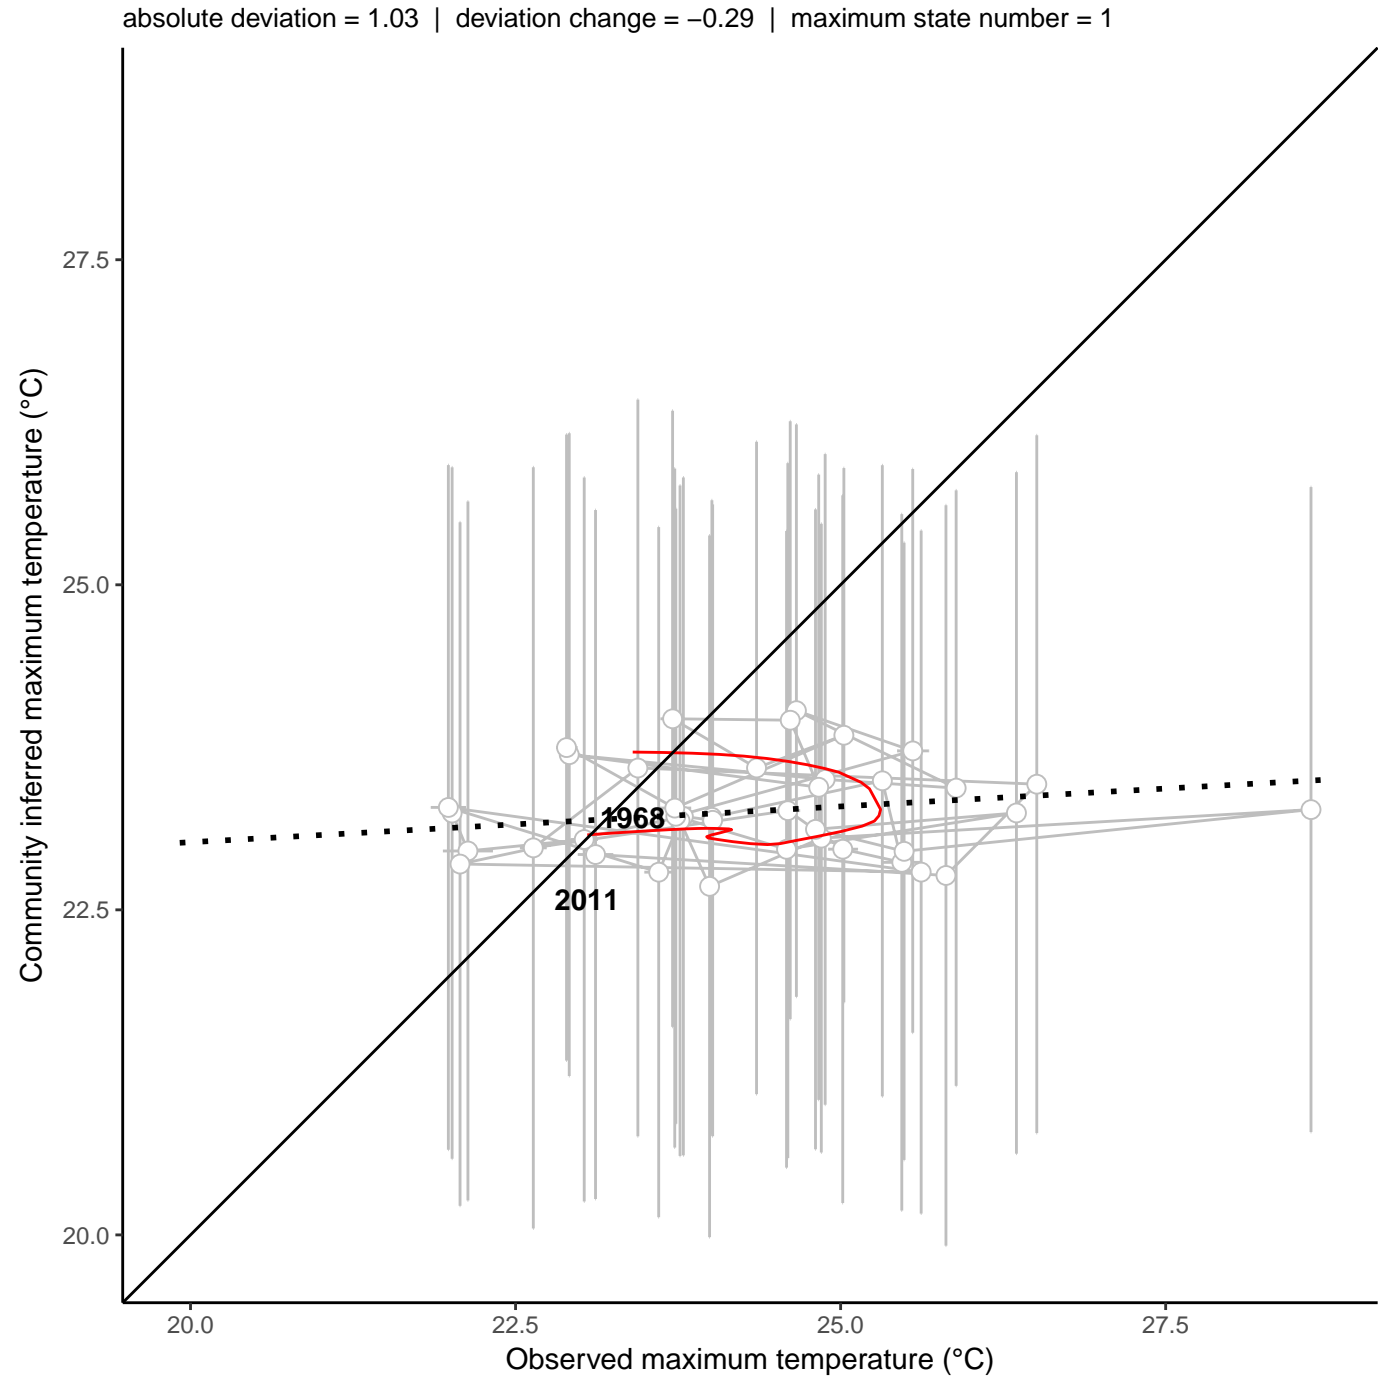



site : 840\_82\_2

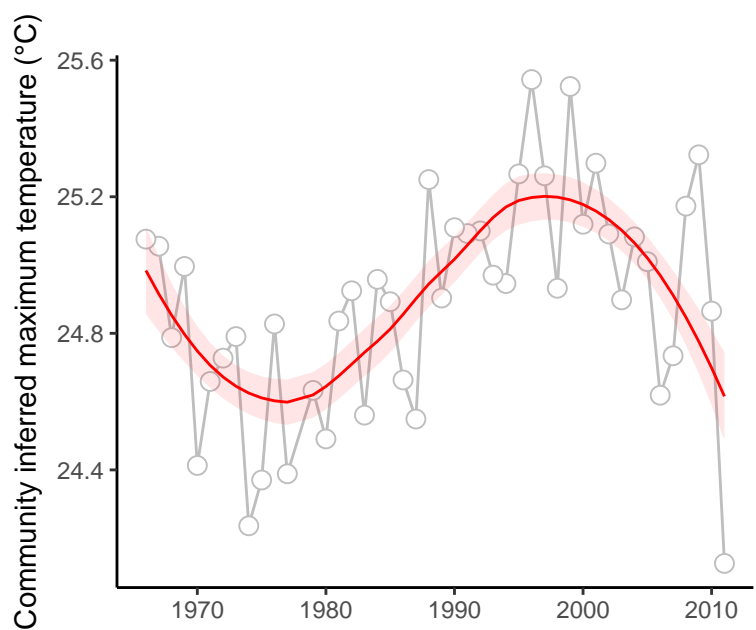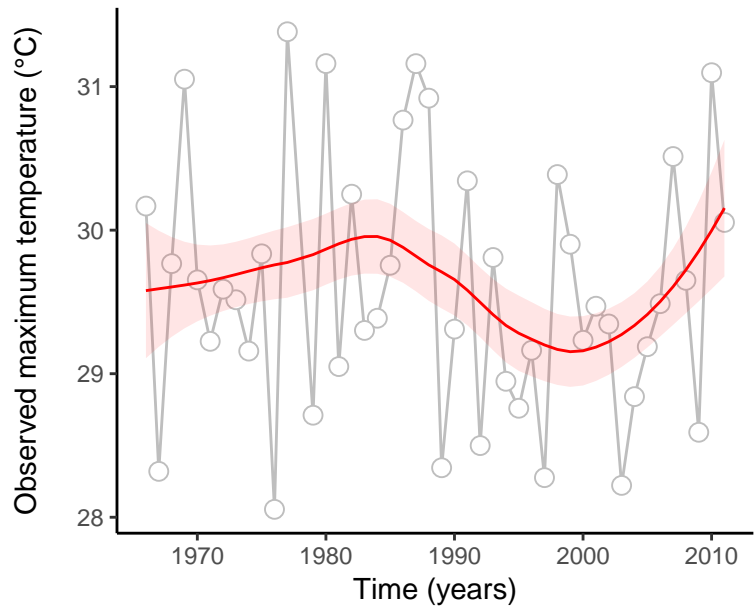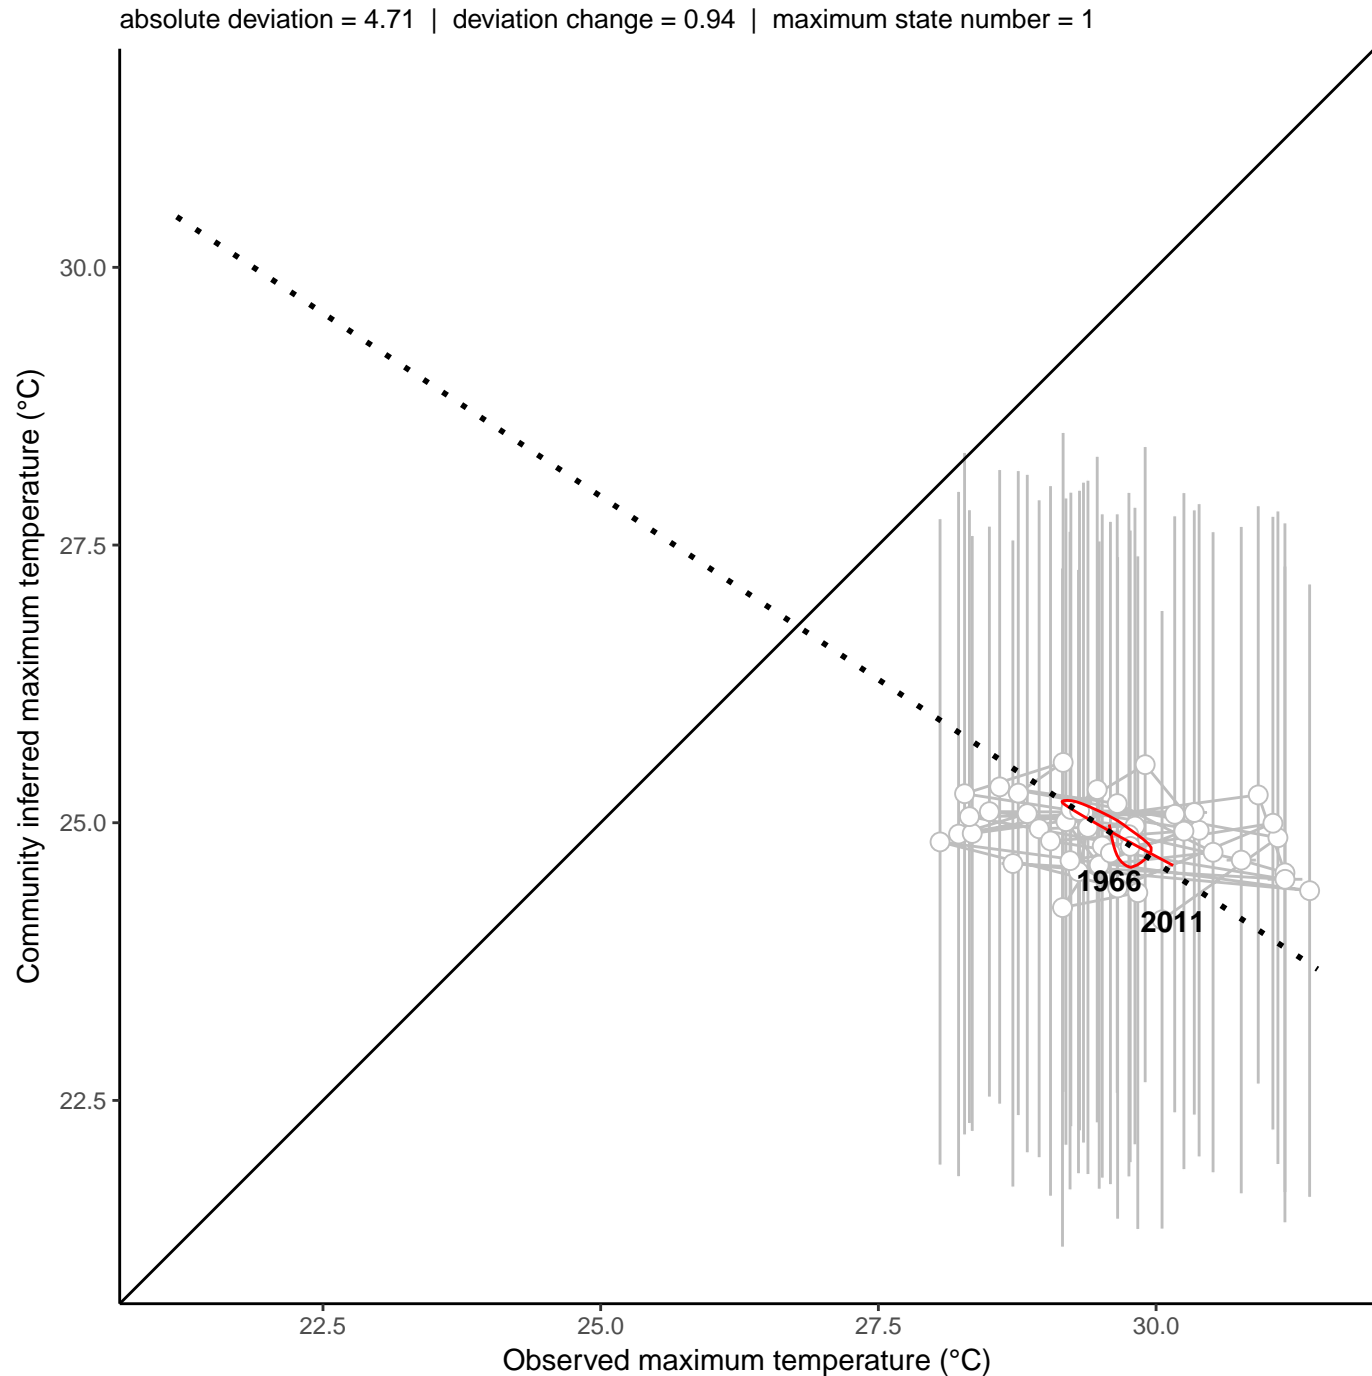

site : 840\_14\_51

absolute deviation = 5.66 | deviation change = -0.2 | maximum state number = 1

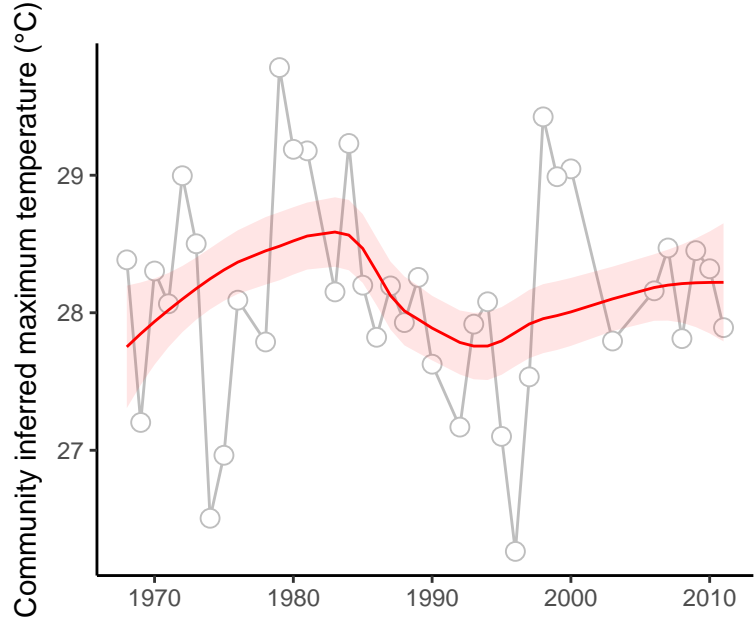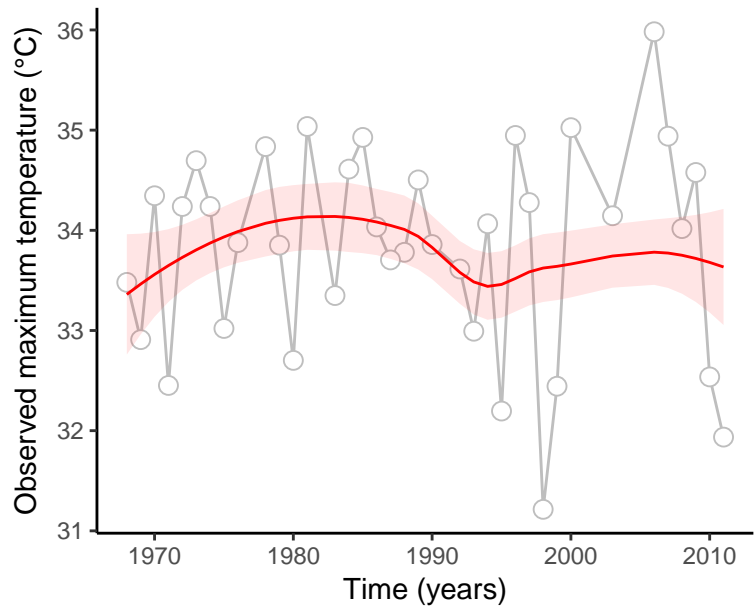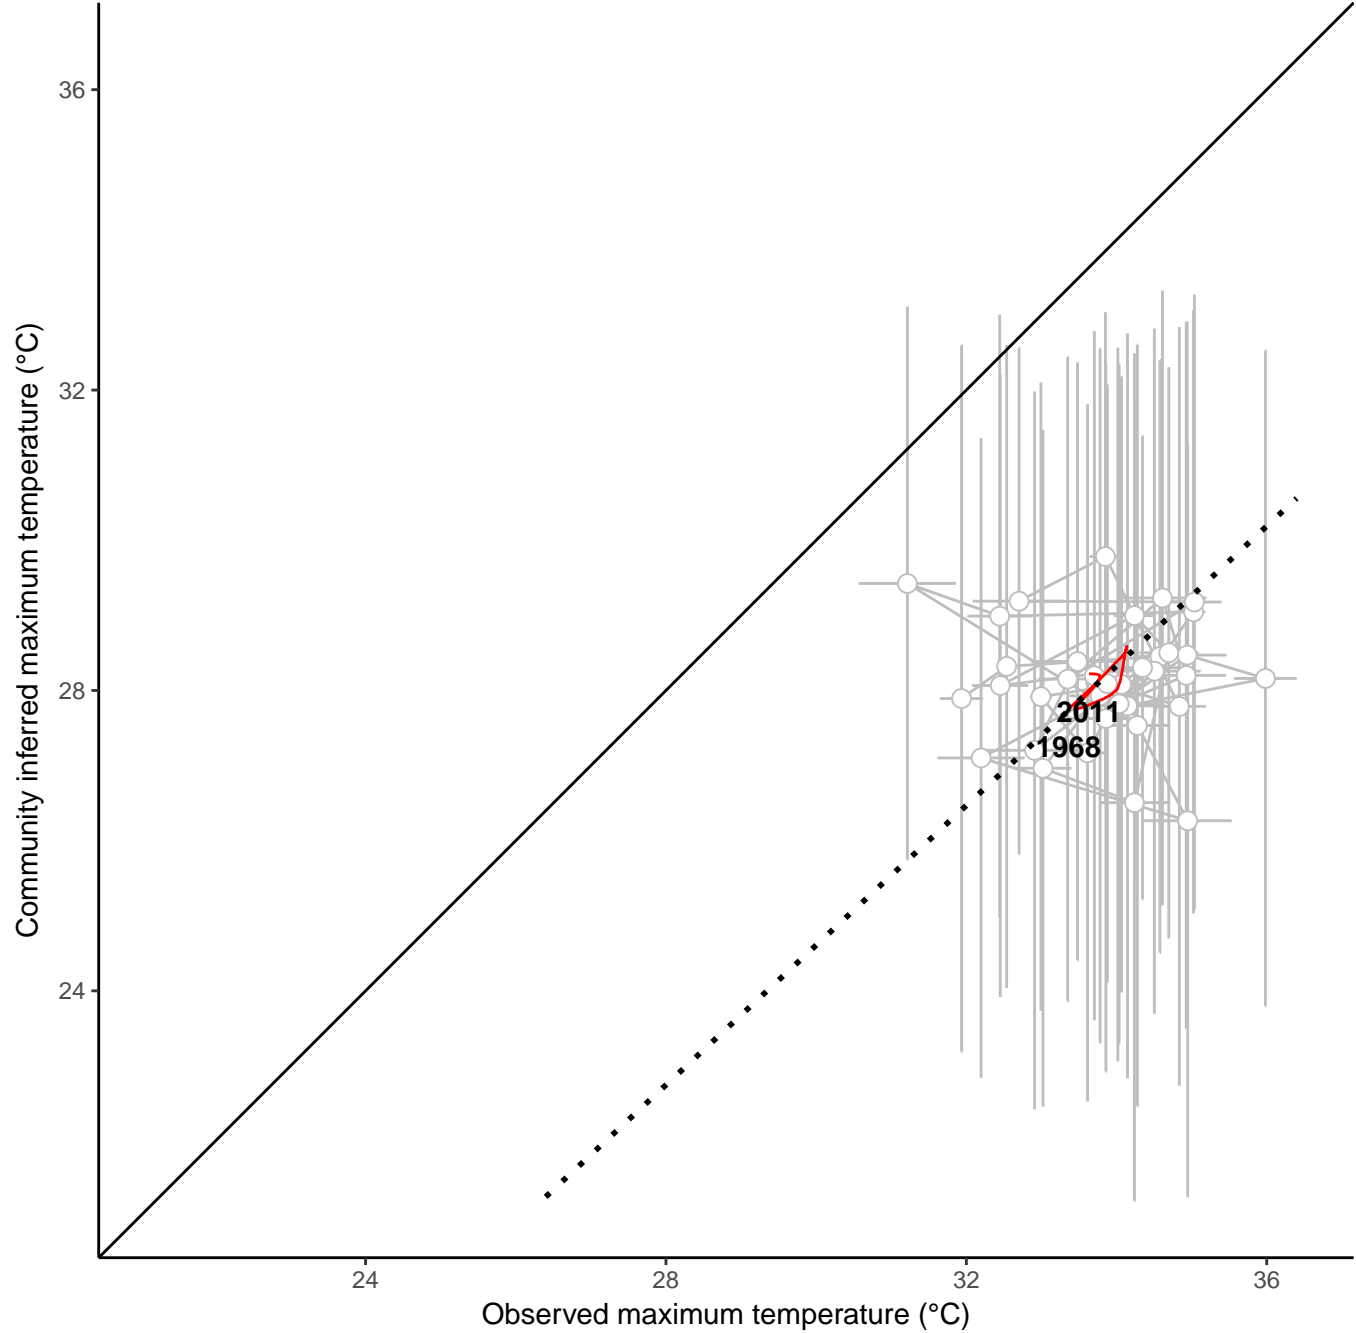

site : 840\_6\_24

absolute deviation = 12.75 | deviation change = 0.59 | maximum state number = 1

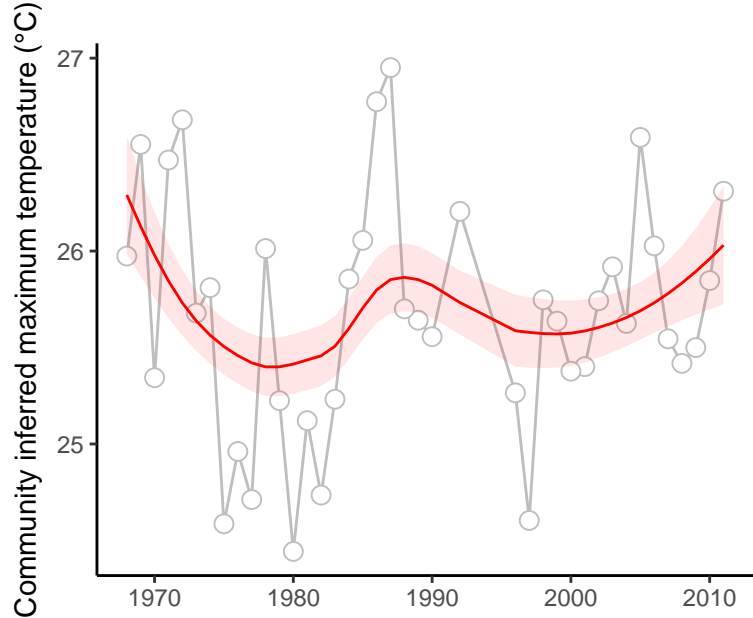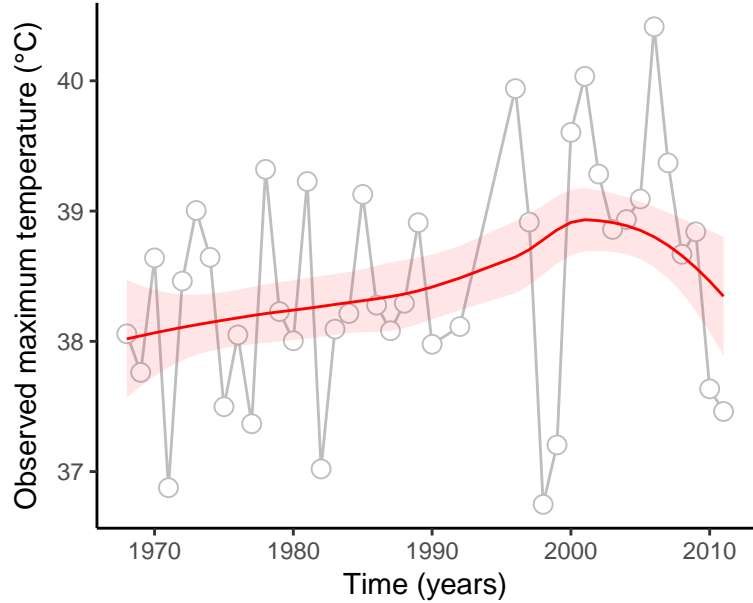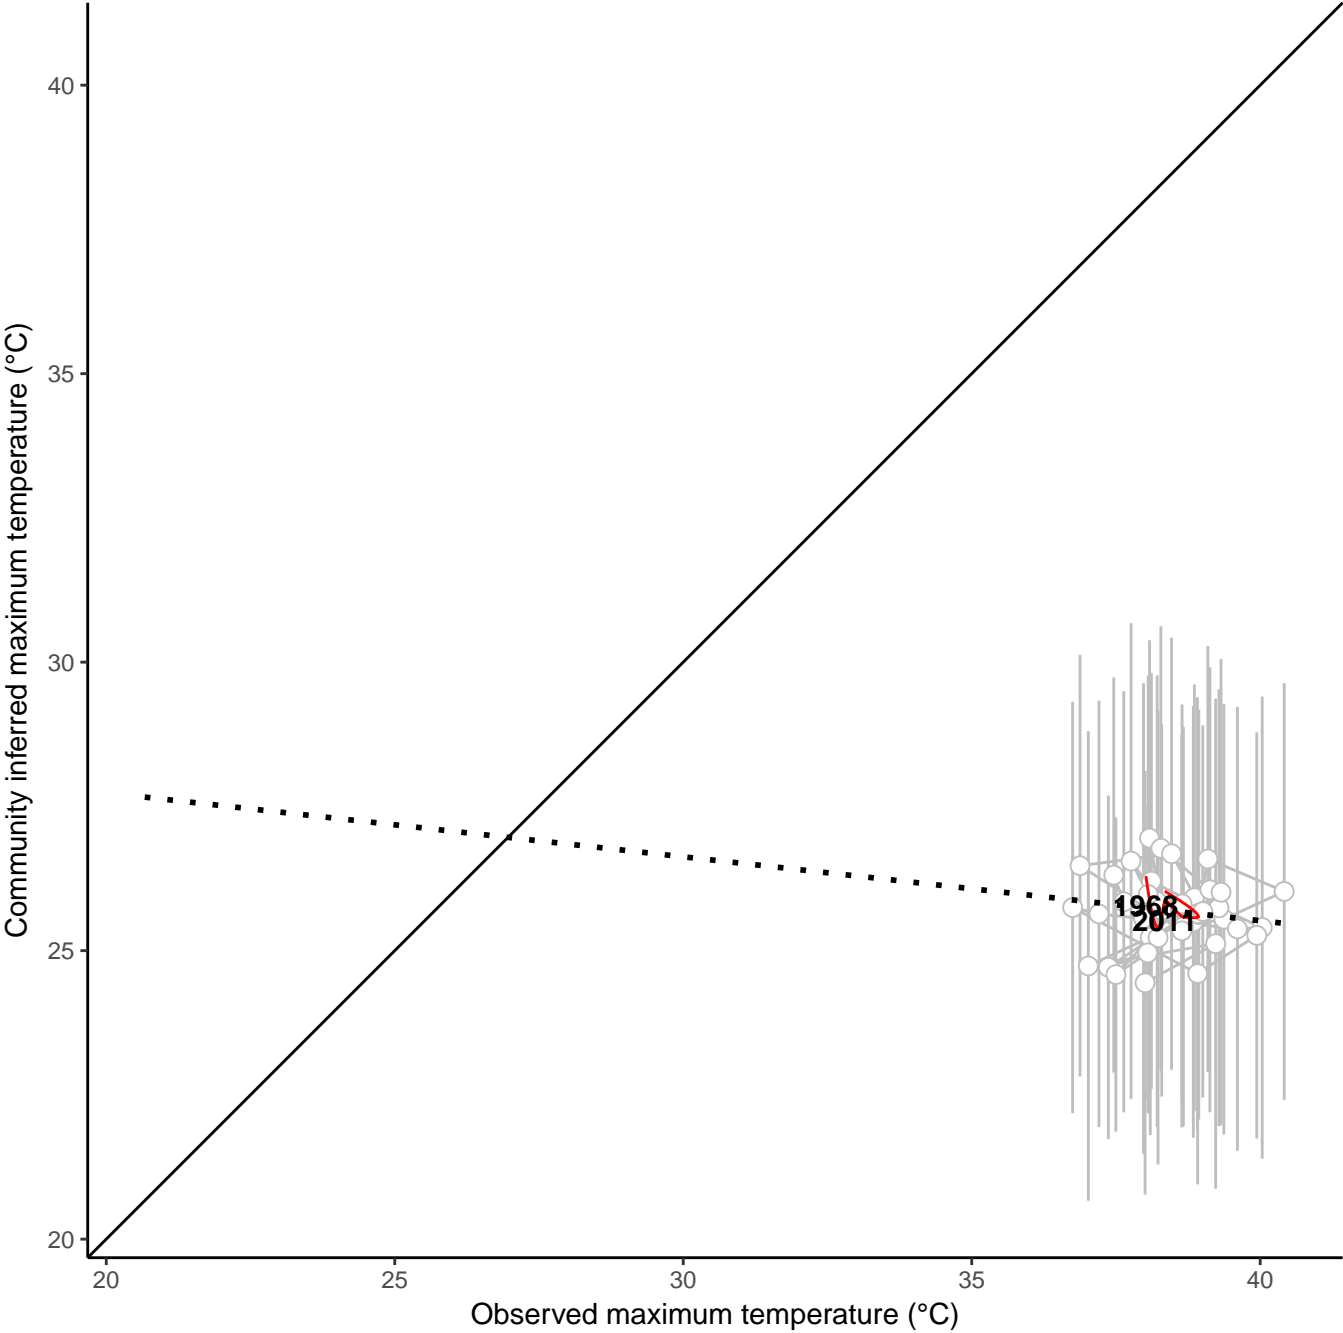

site : 840\_14\_116

absolute deviation = 0.63 | deviation change = -0.5 | maximum state number = 1

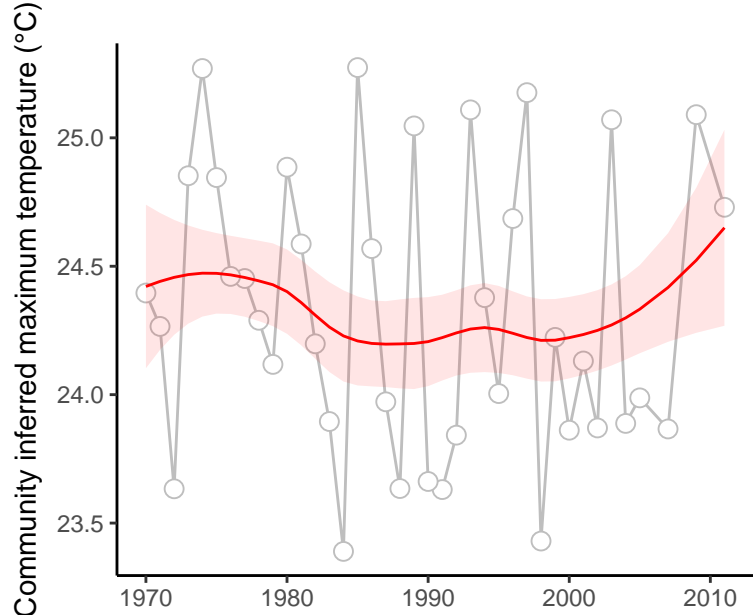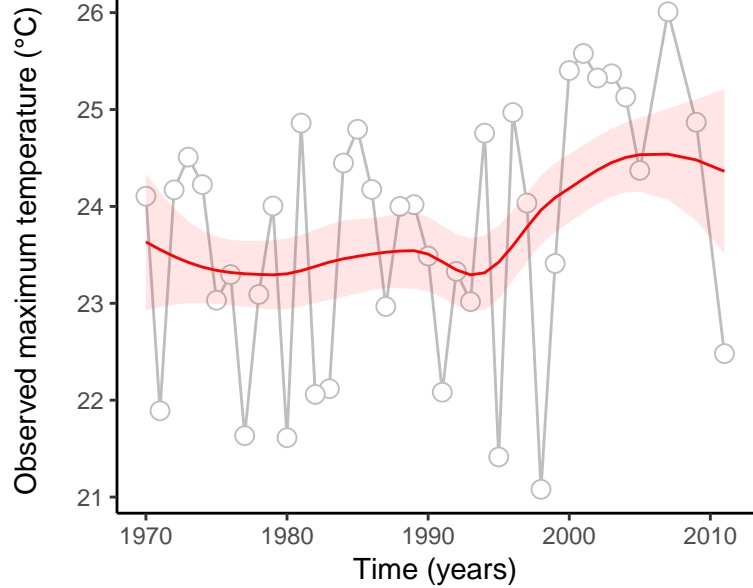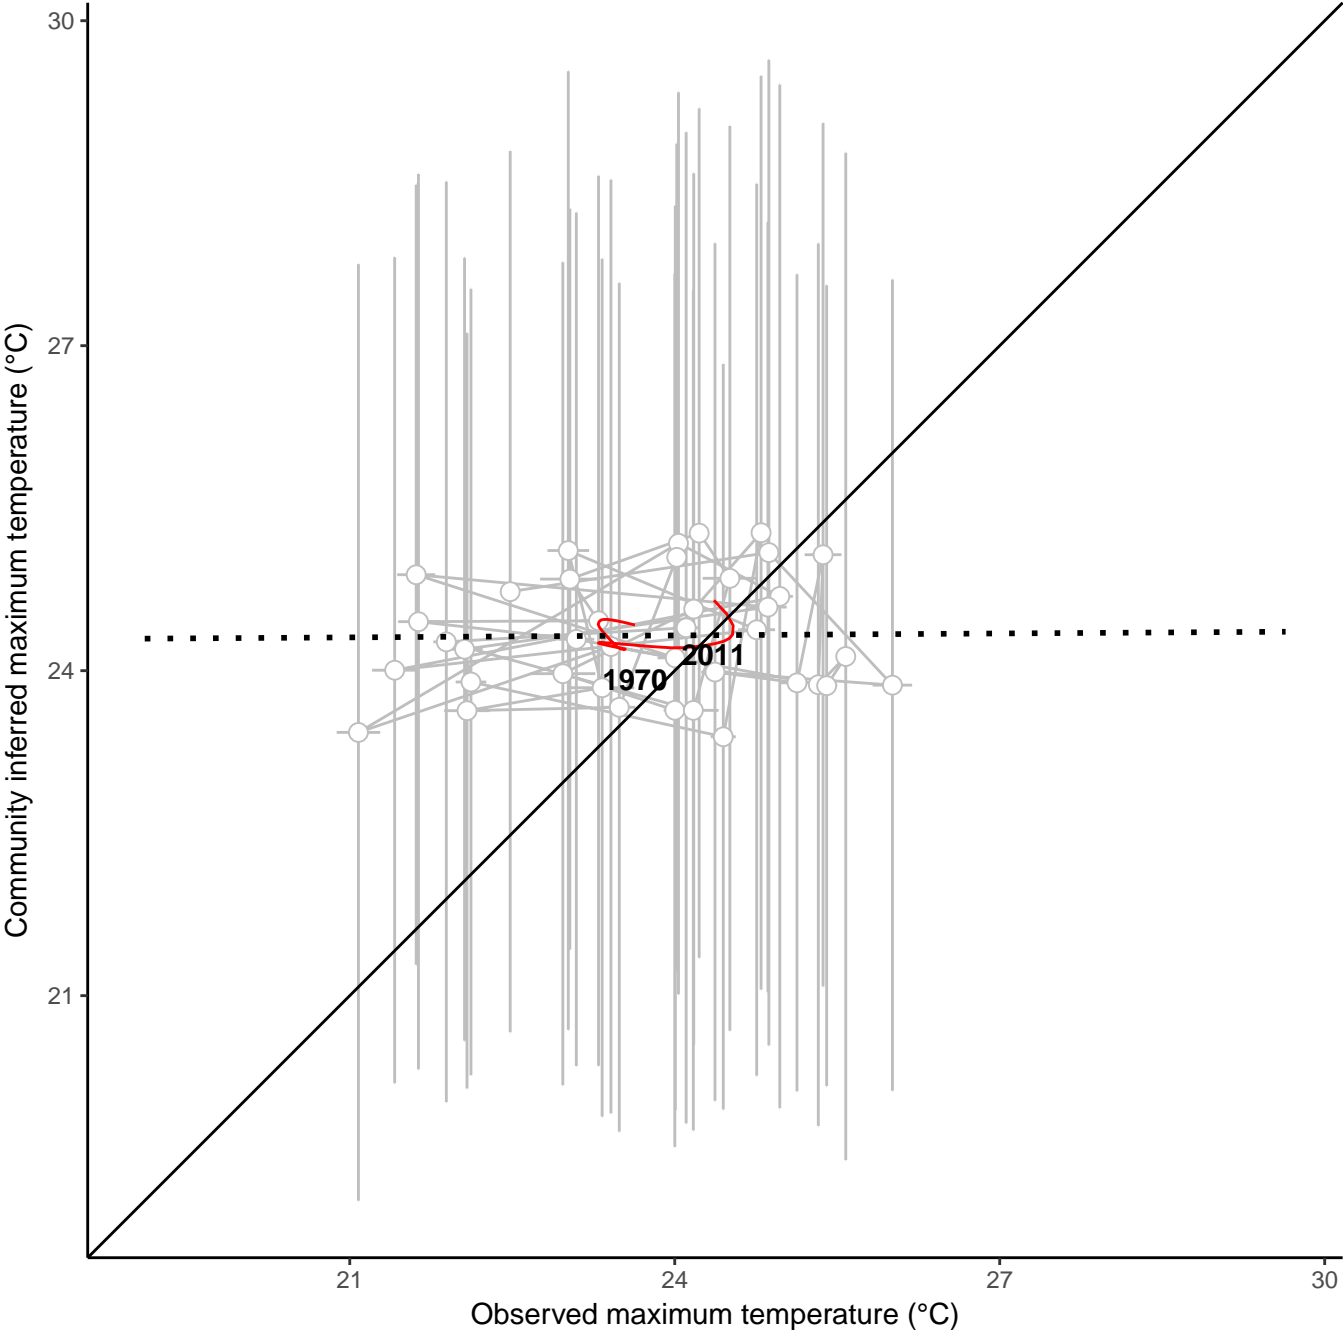

site : 840\_53\_38

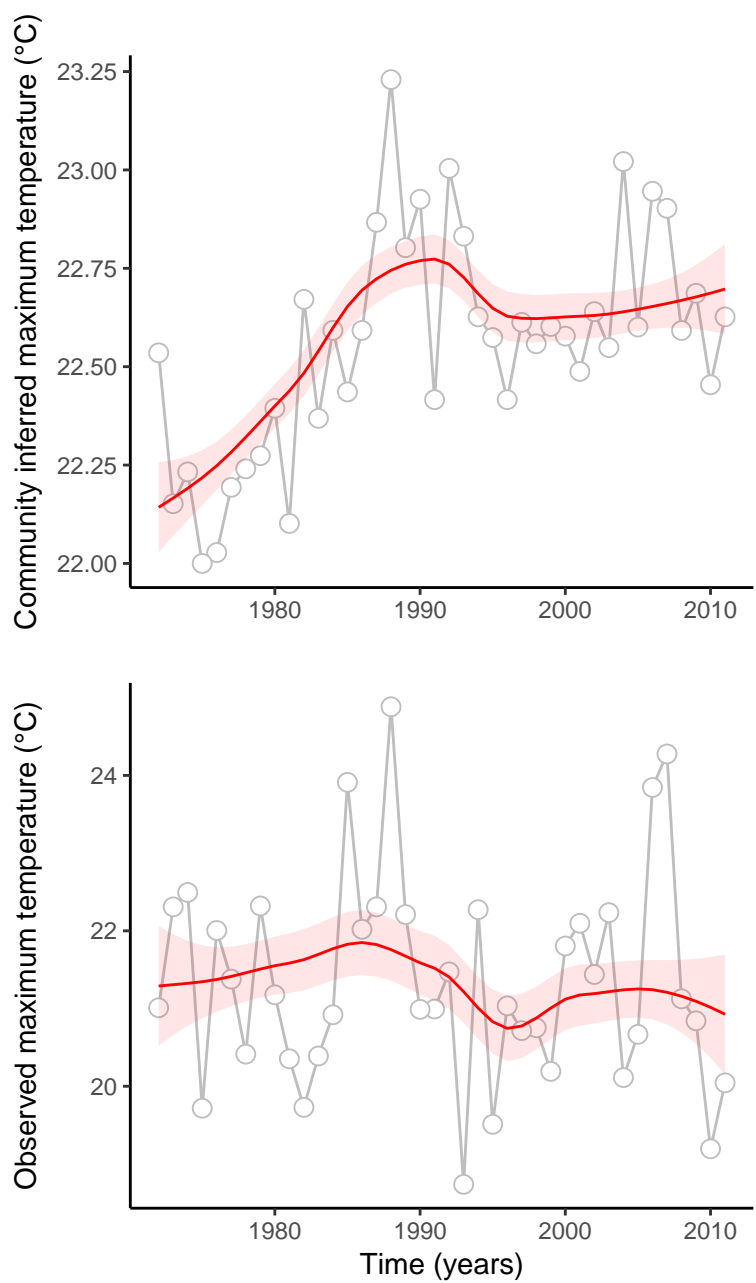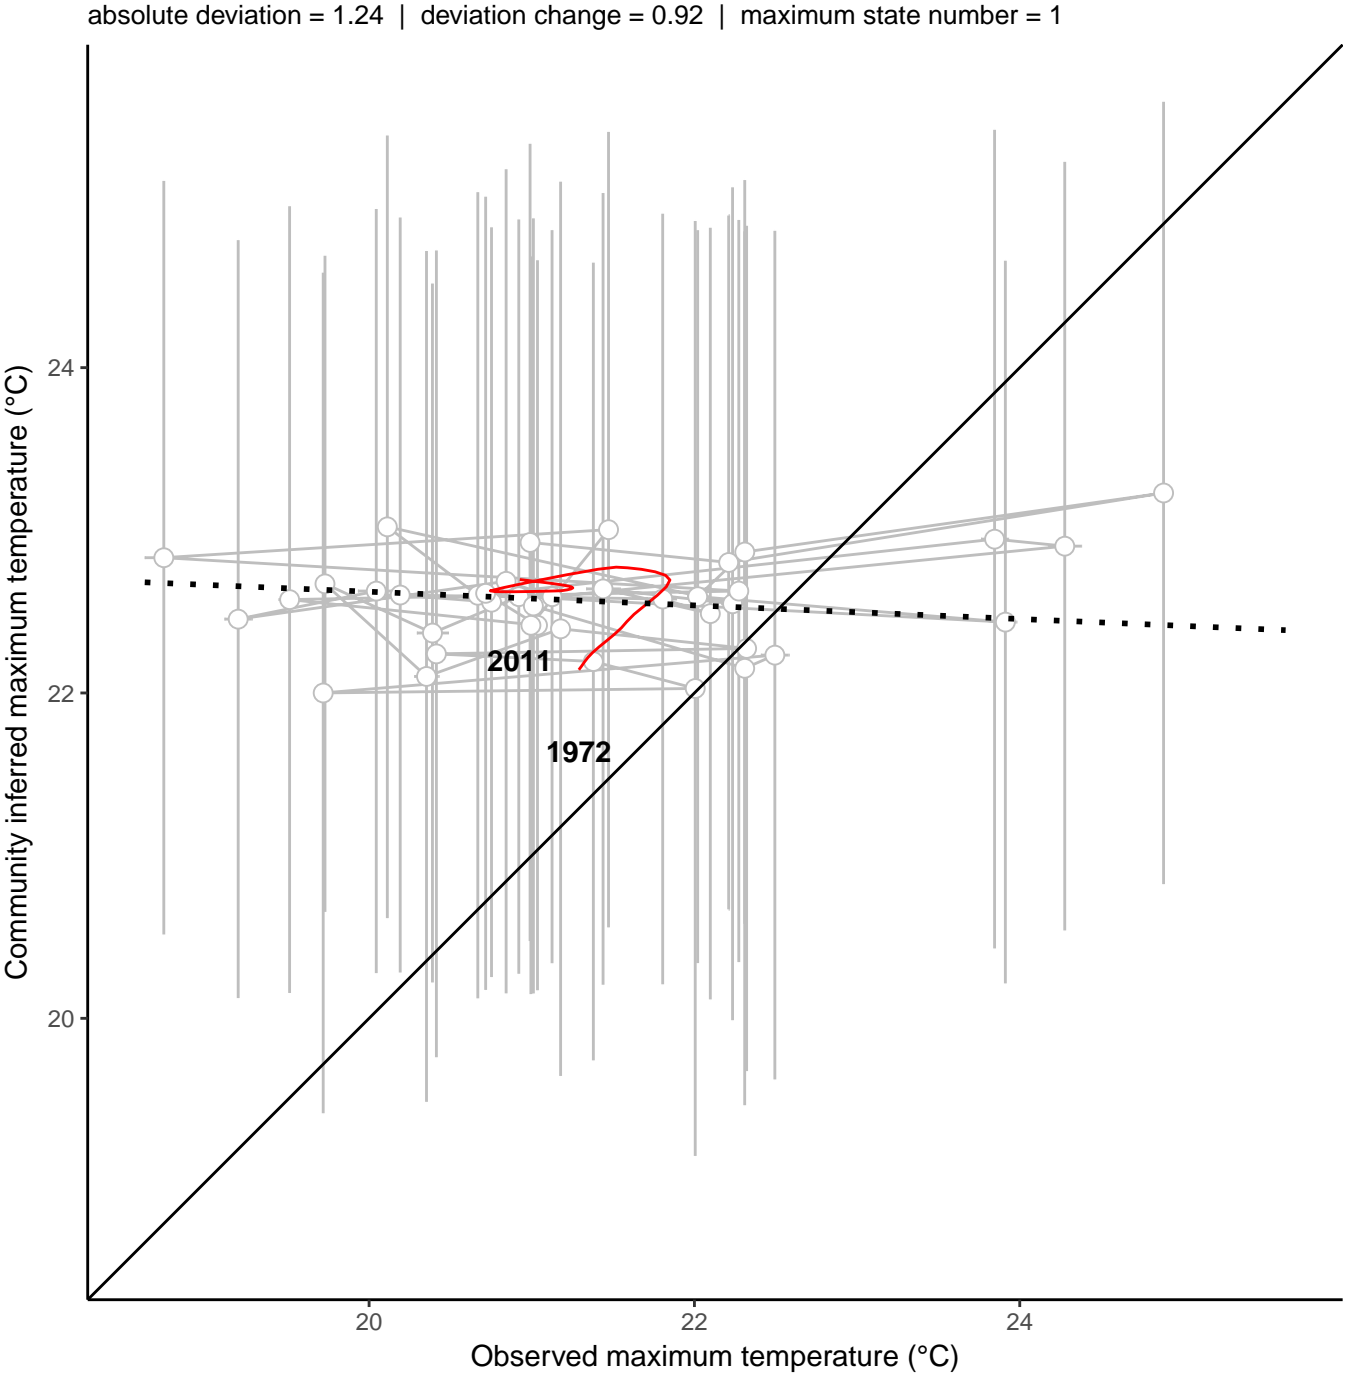

site : 840\_14\_18

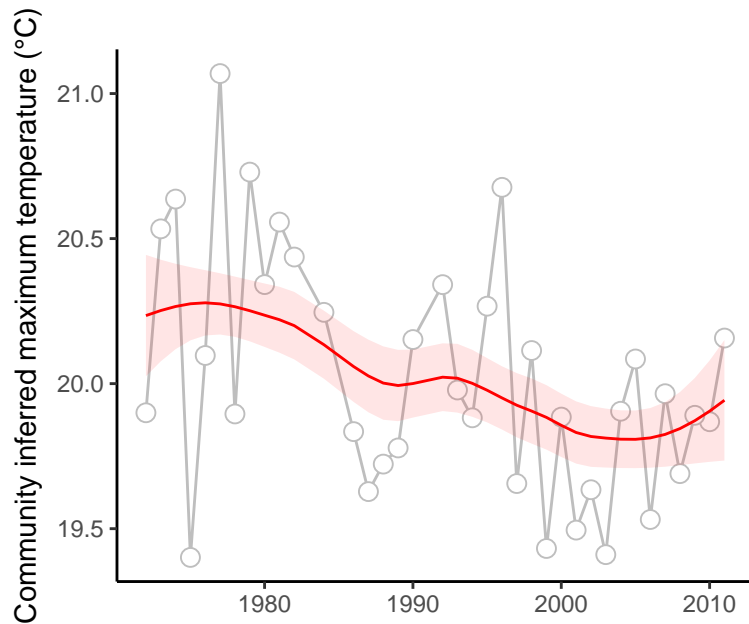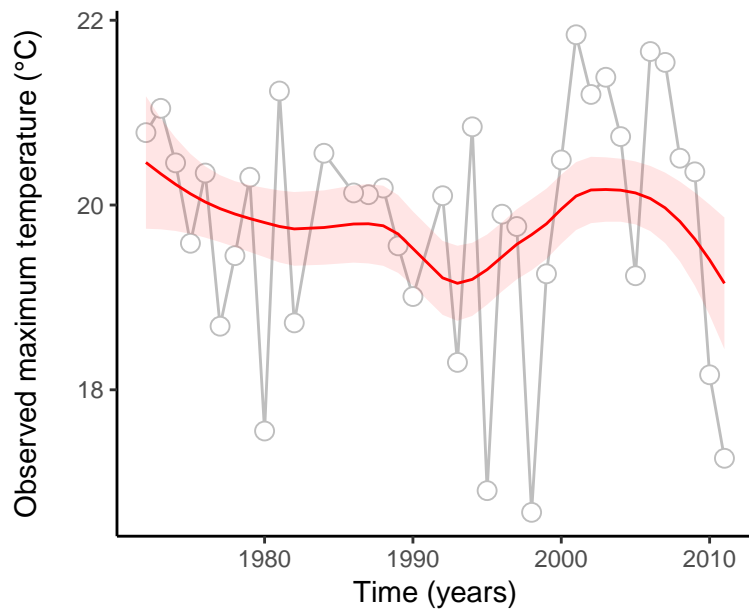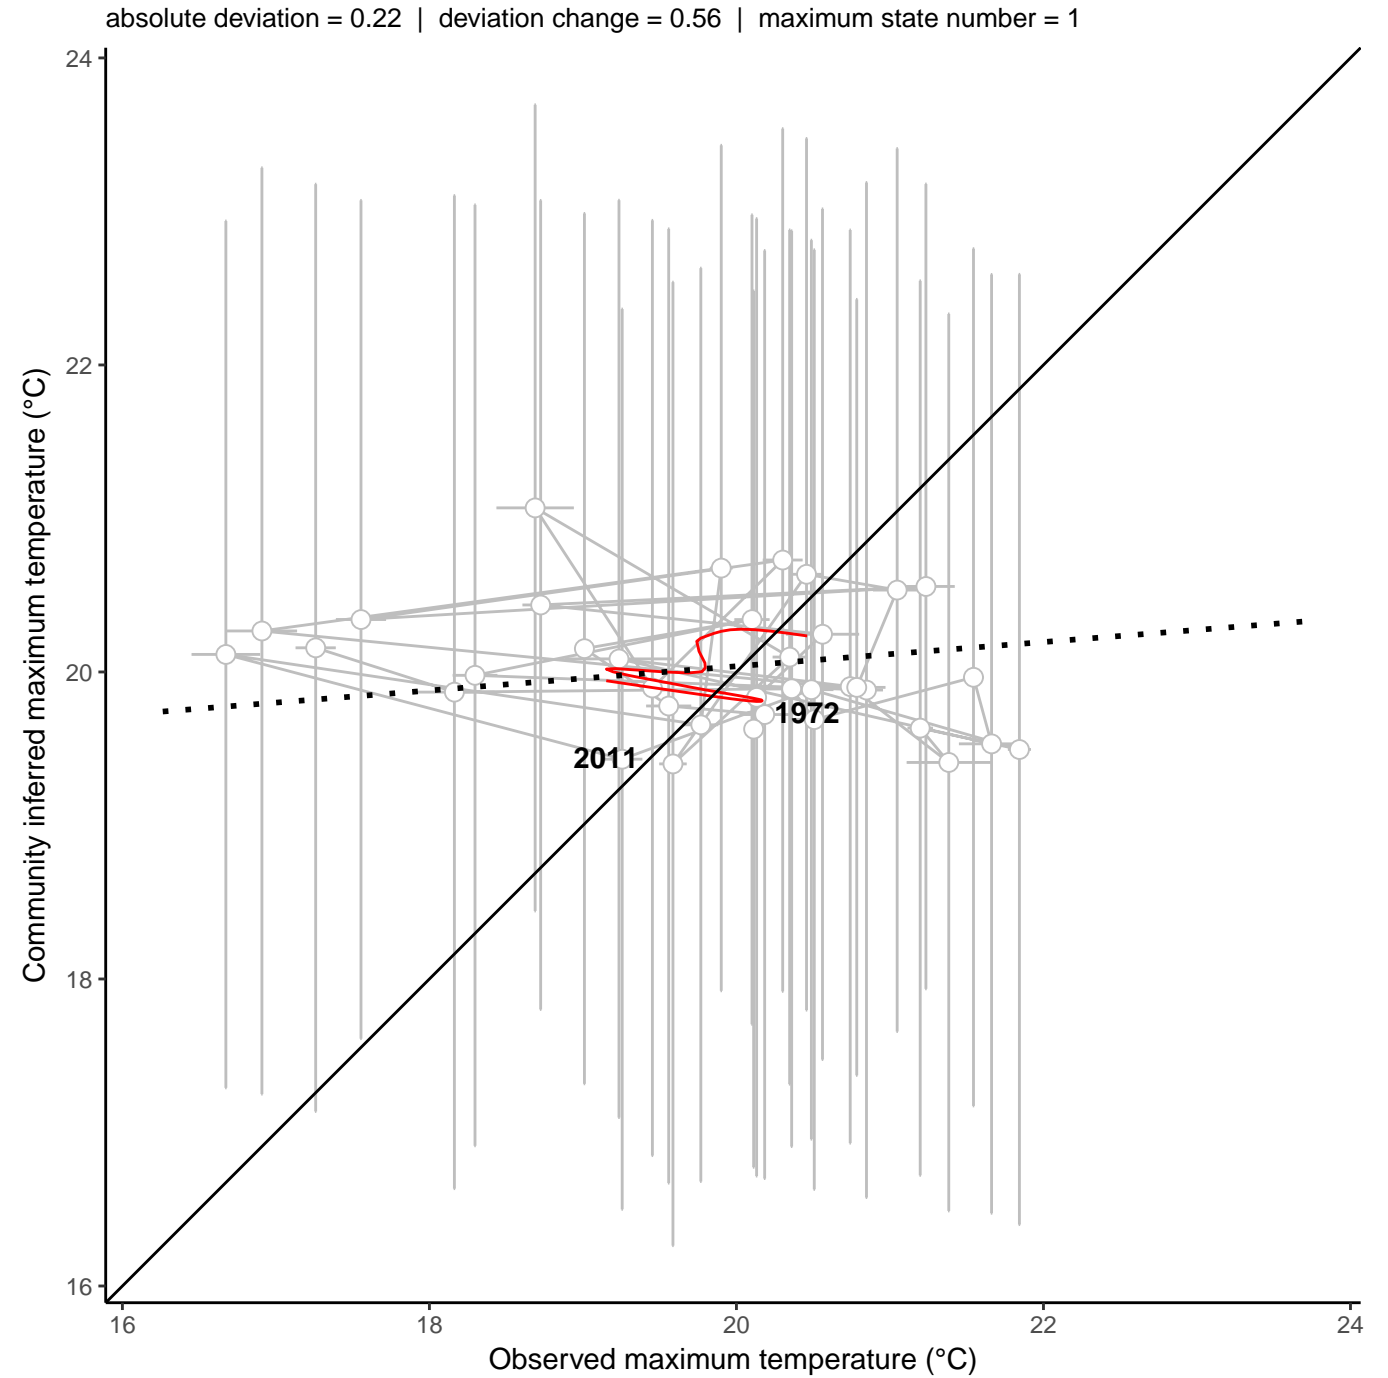

site : 840\_17\_23

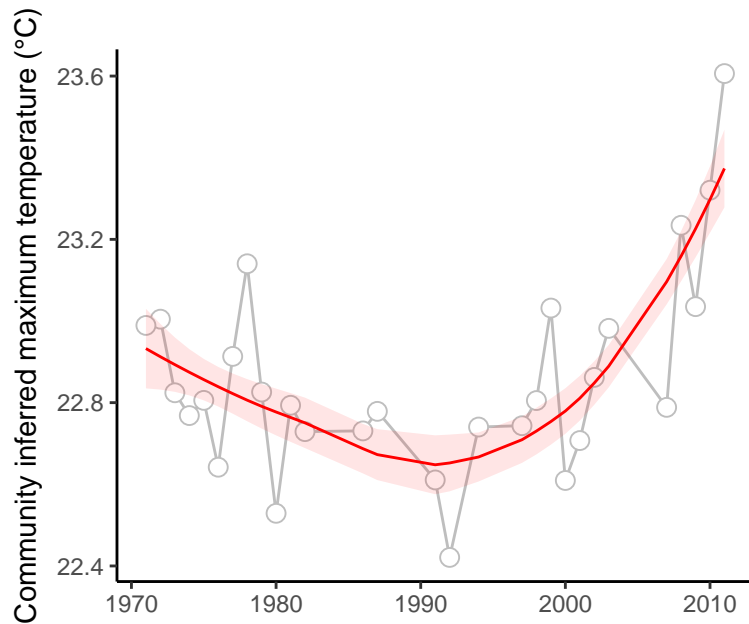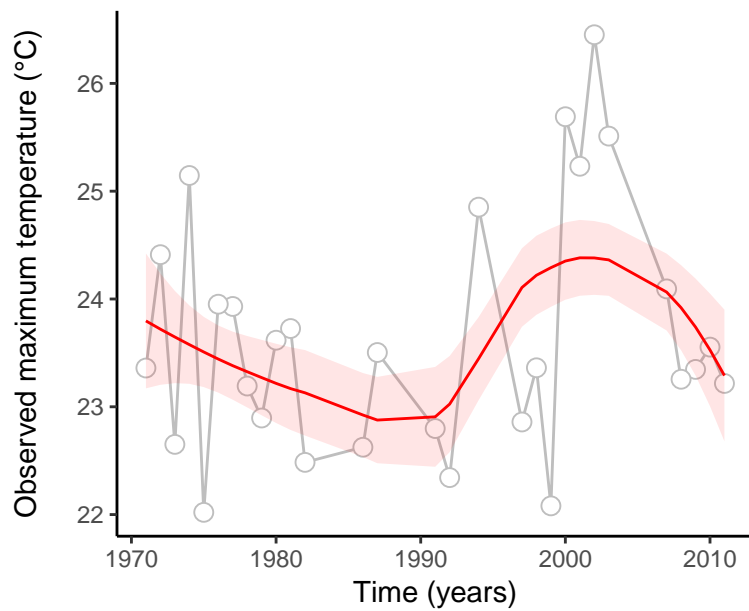

absolute deviation = 0.76 | deviation change = -0.78 | maximum state number = 1

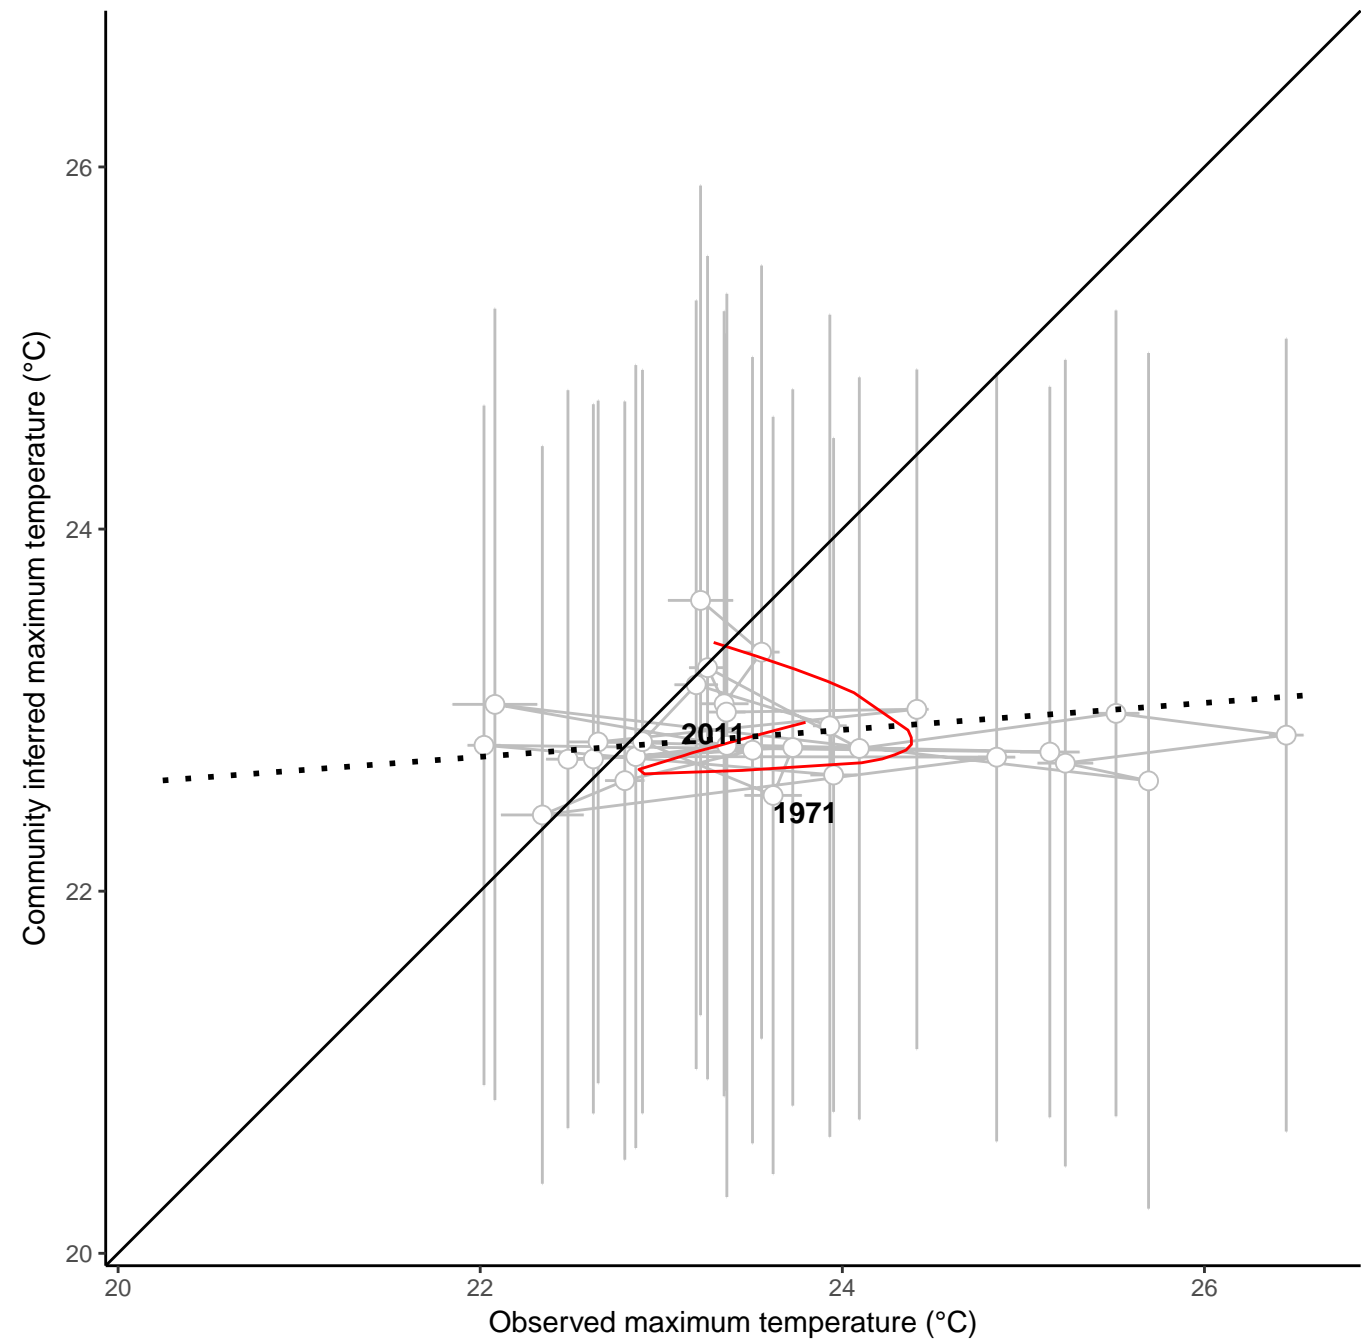

site : 840\_92\_19

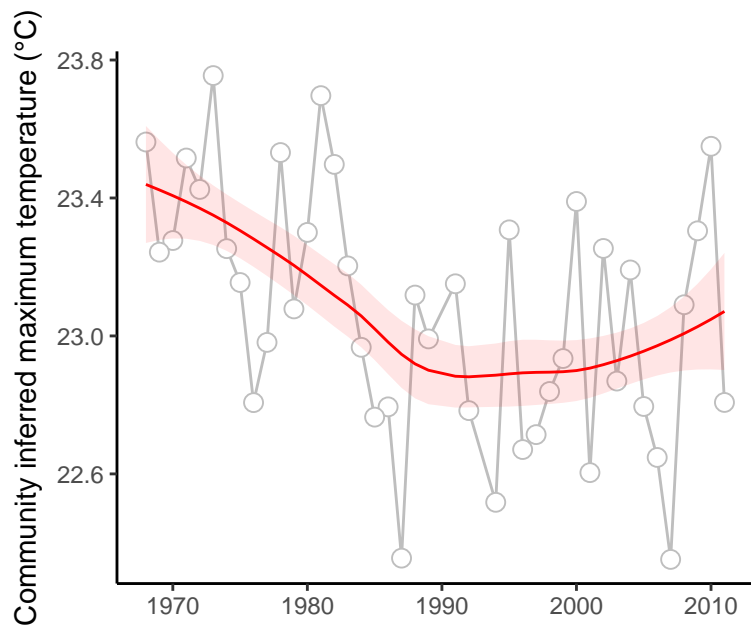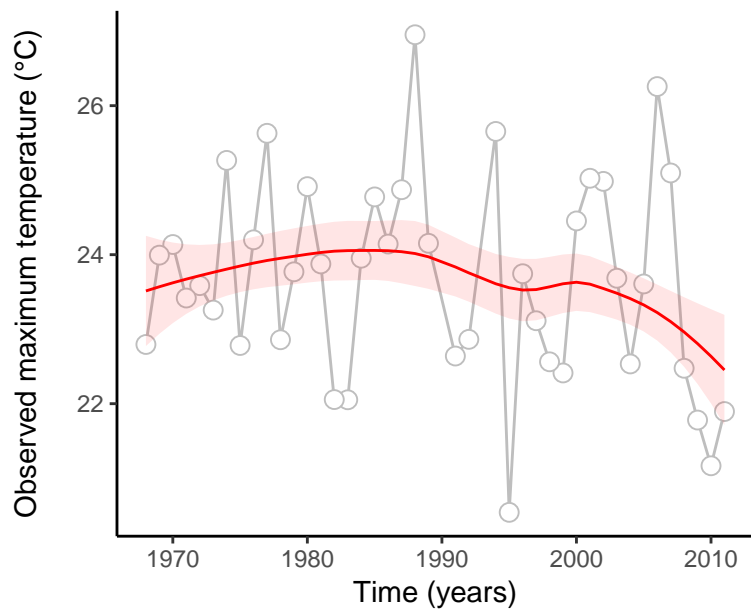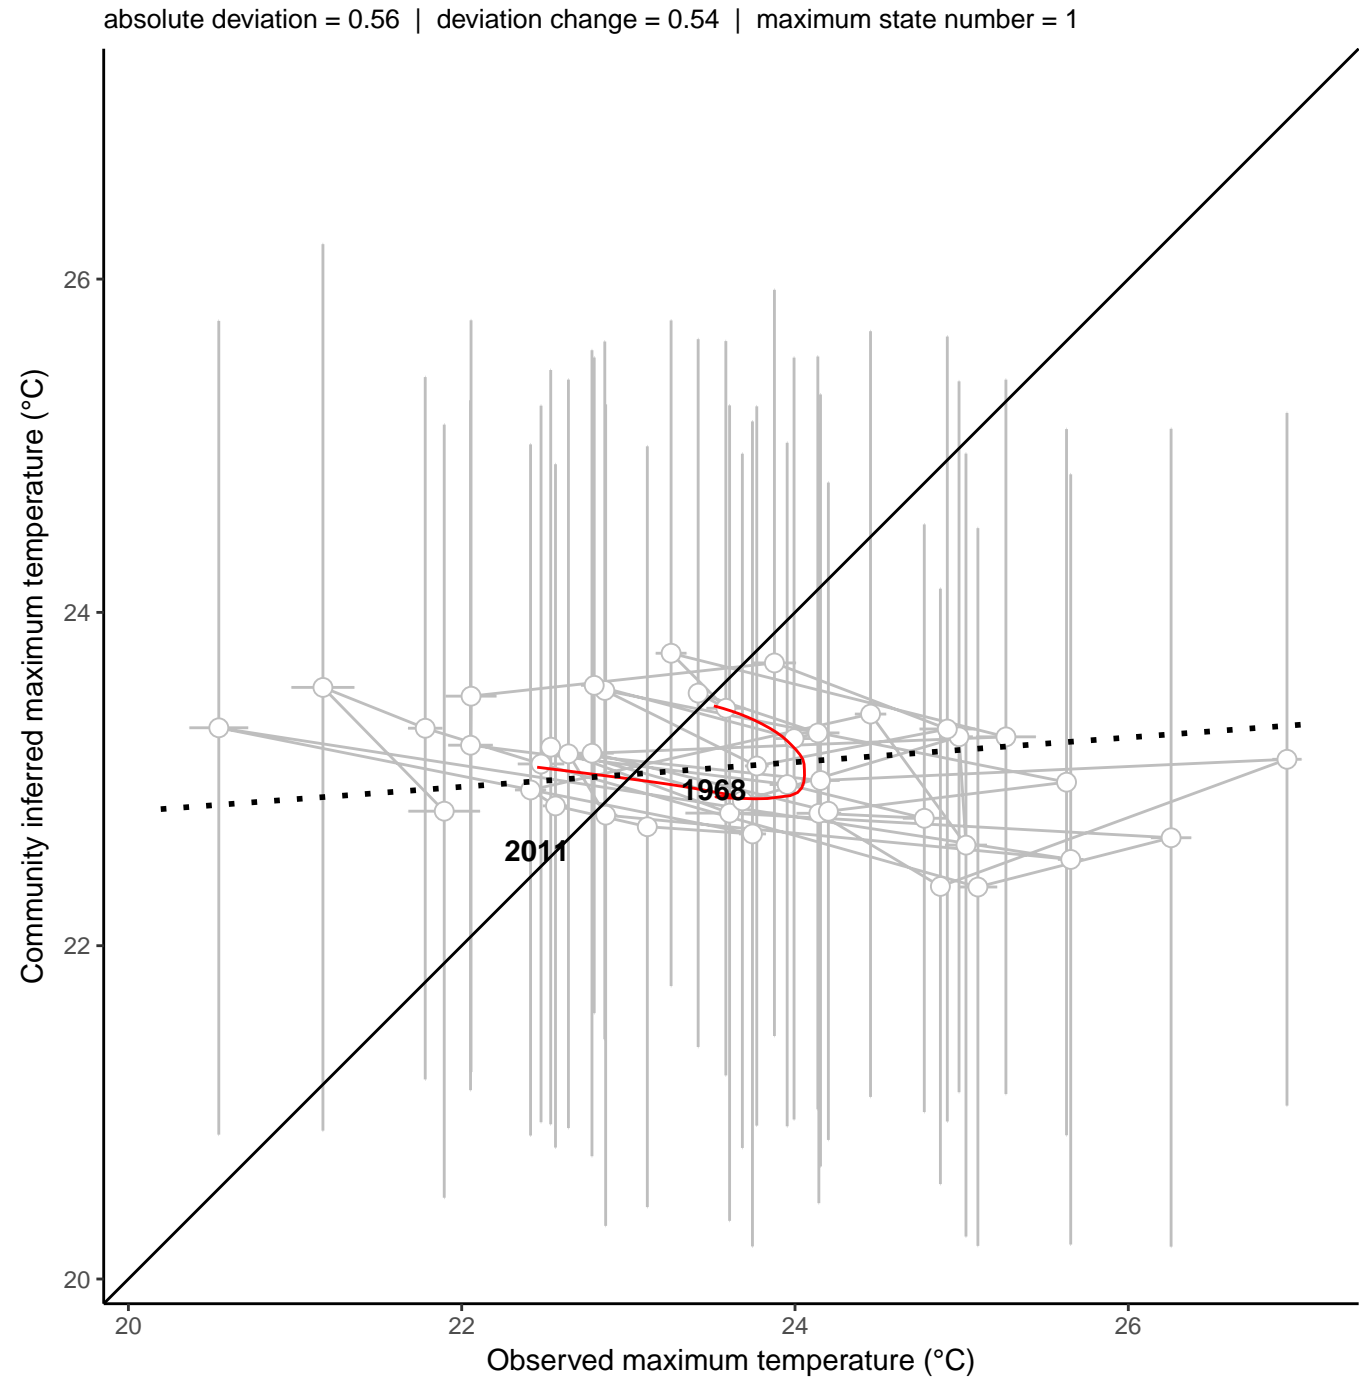



site : 840\_83\_82

absolute deviation = 5.94 | deviation change = 0.58 | maximum state number = 2

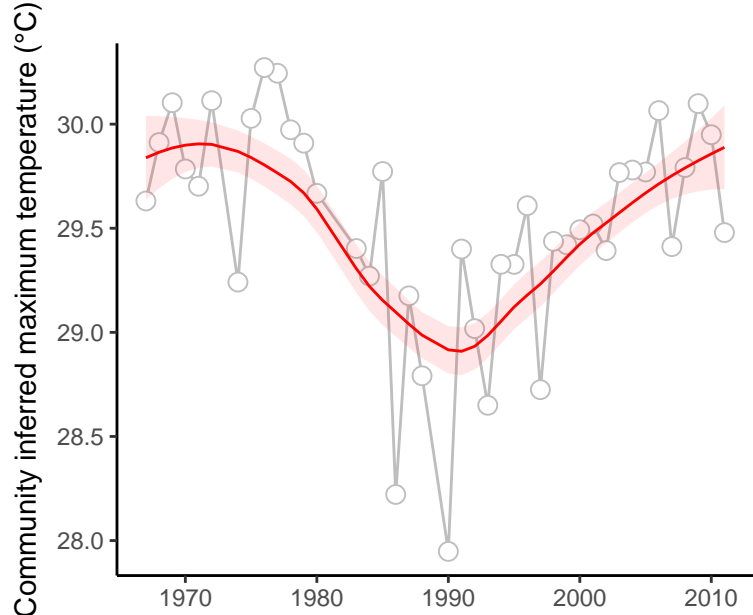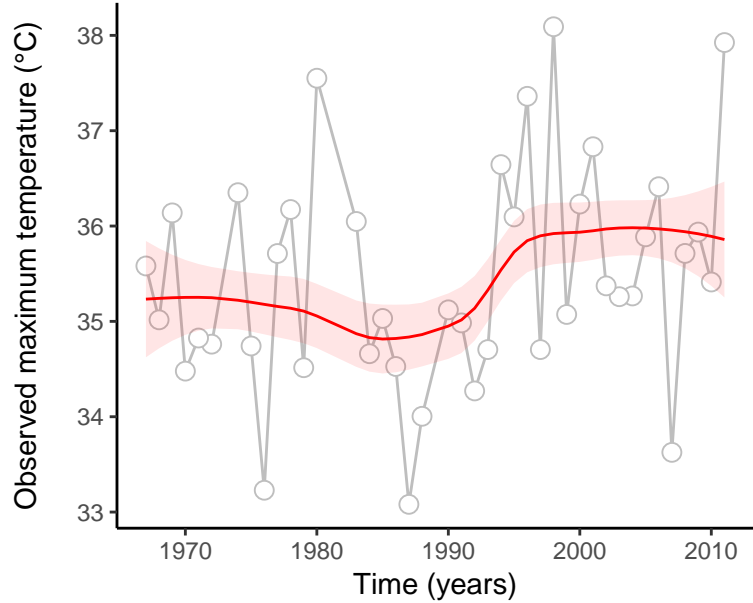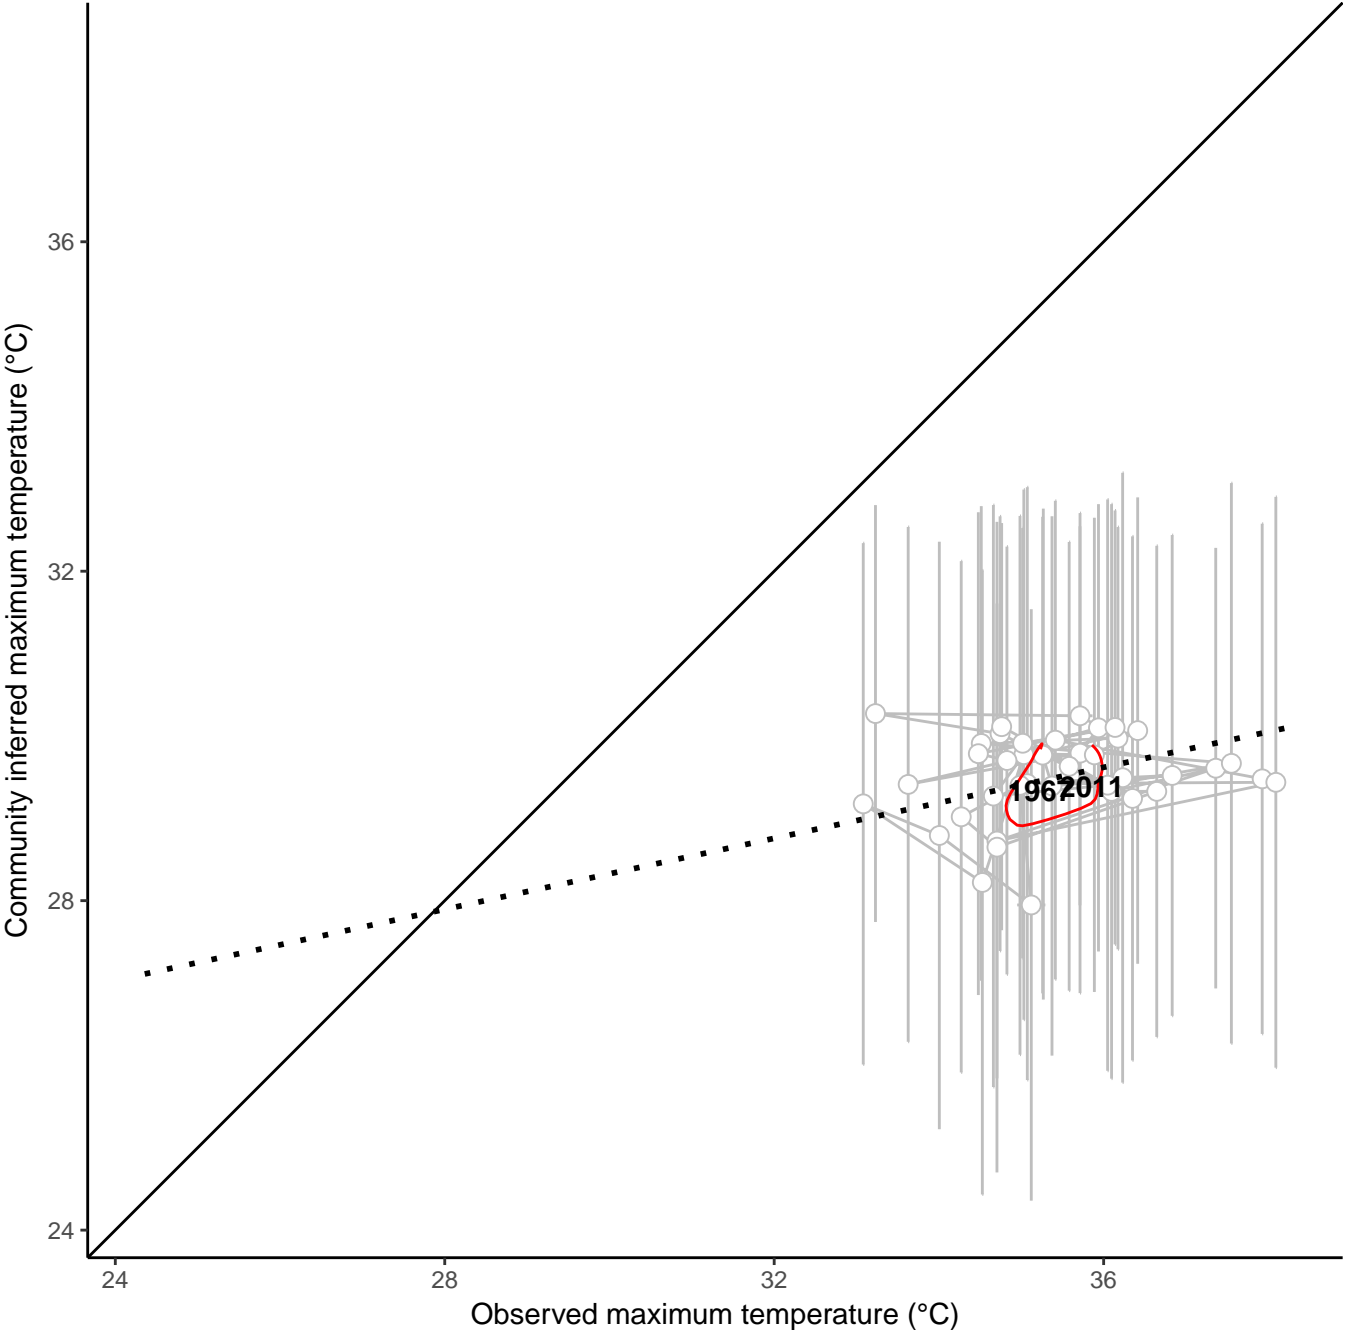

site : 840\_2\_7

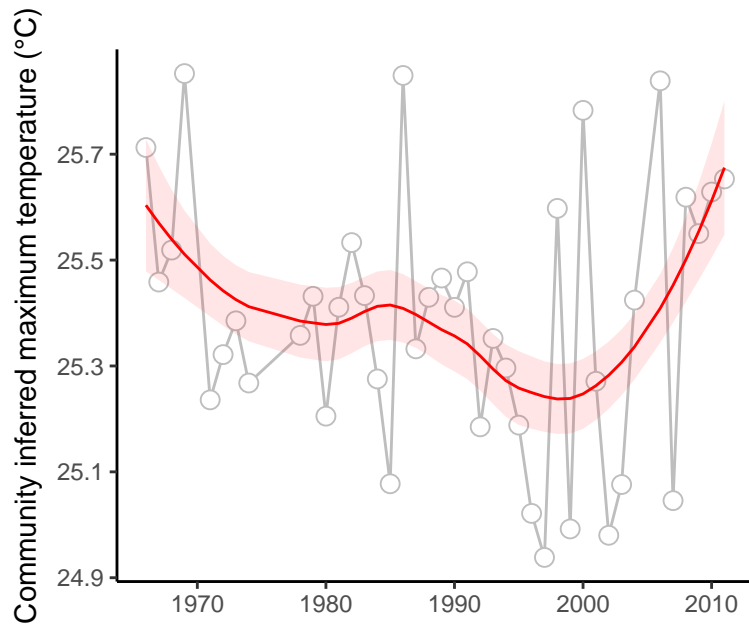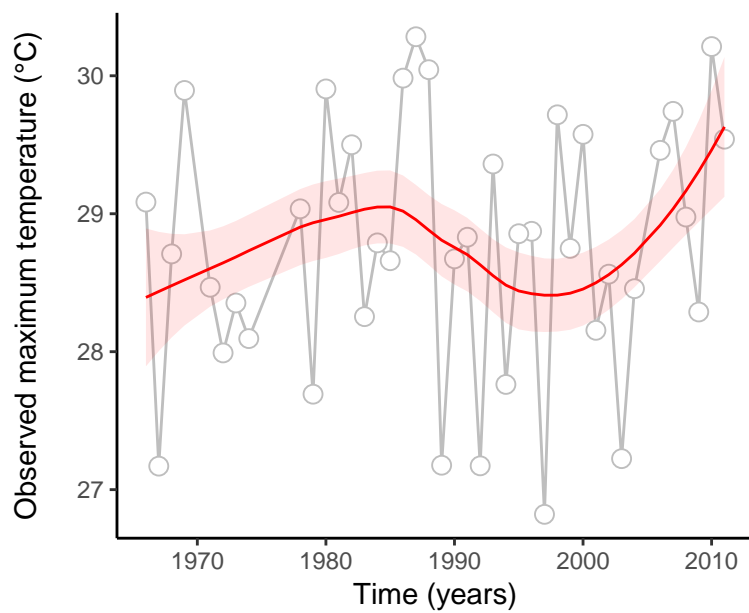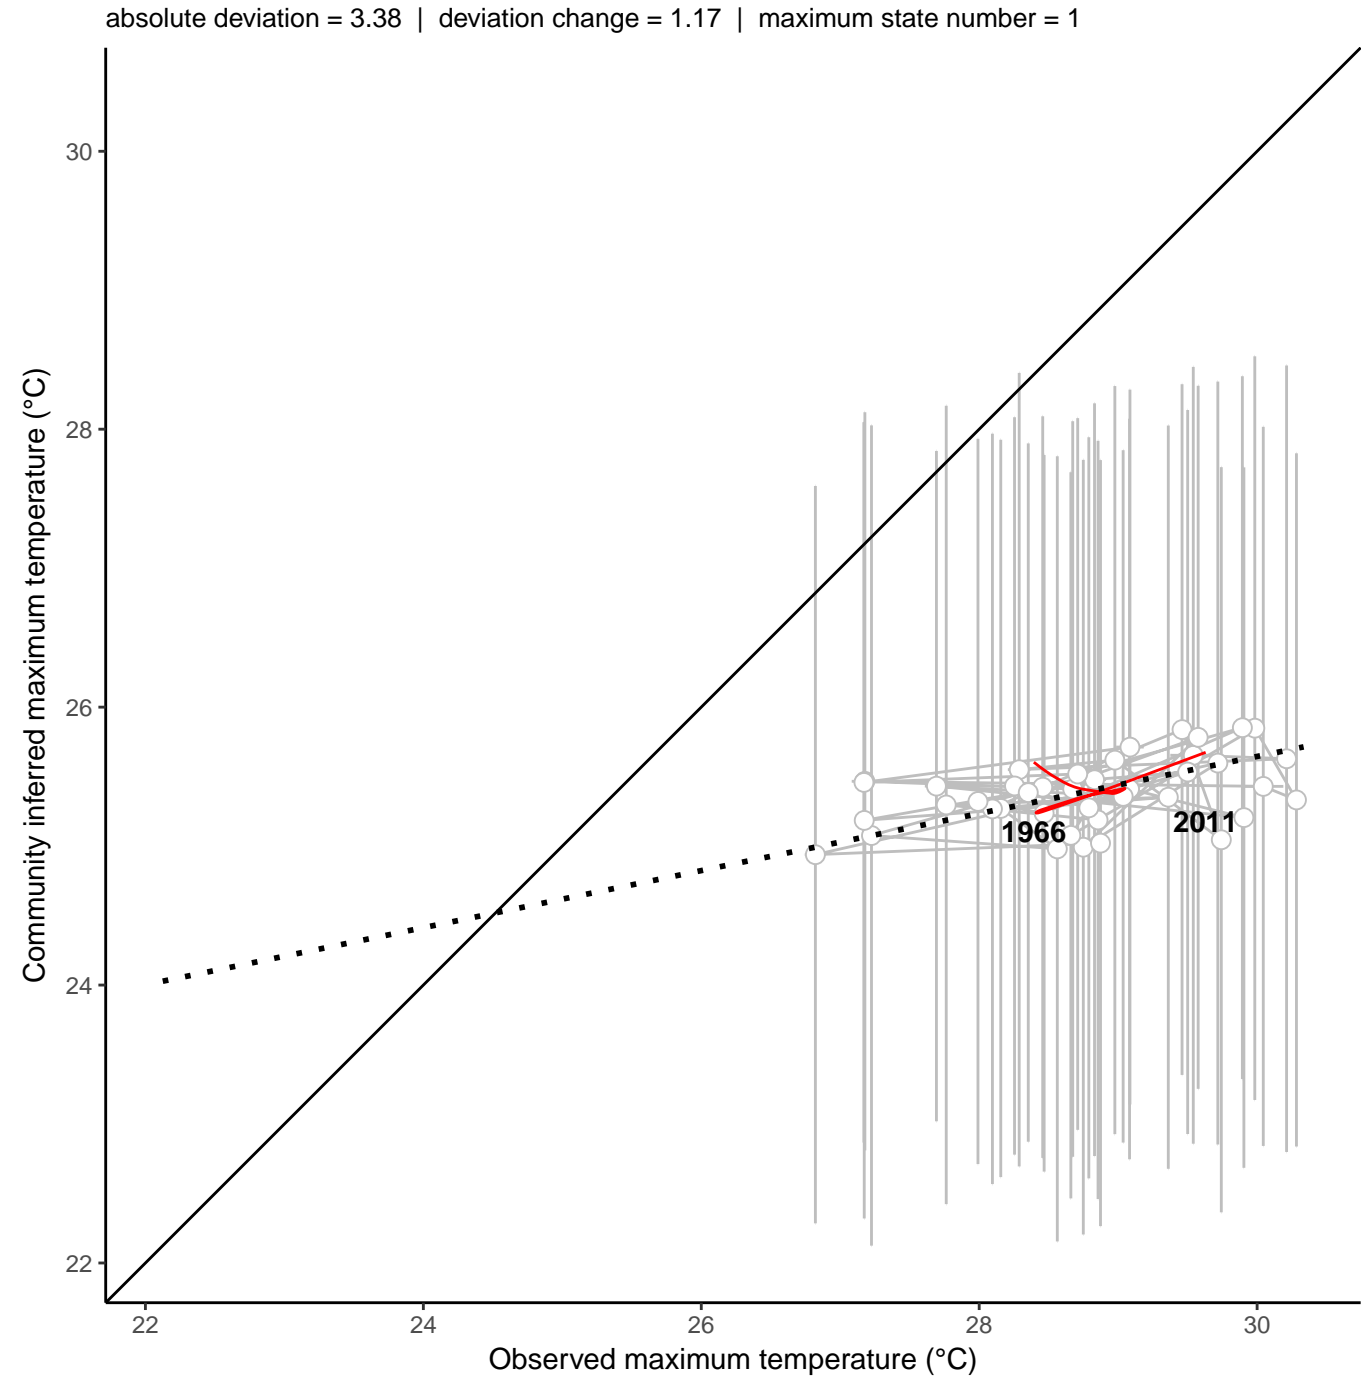

site : 840\_25\_26

absolute deviation = 5.49 | deviation change = 0.84 | maximum state number = 2

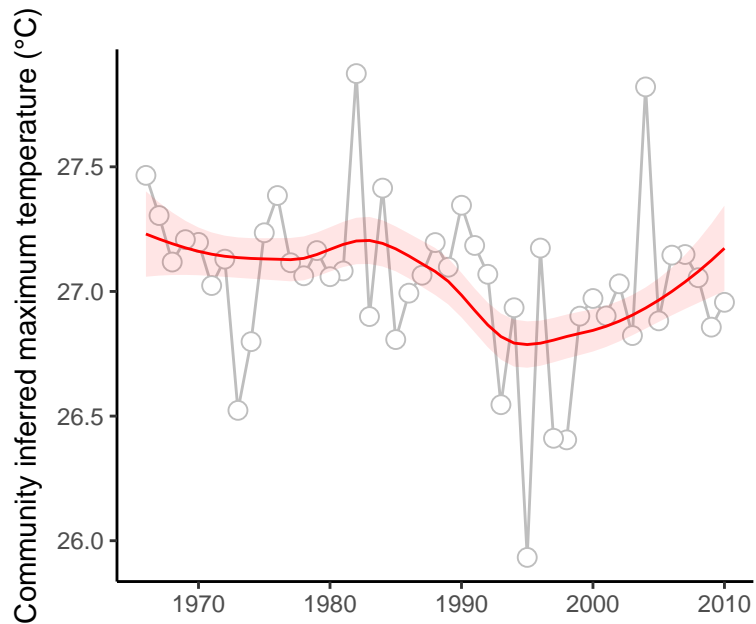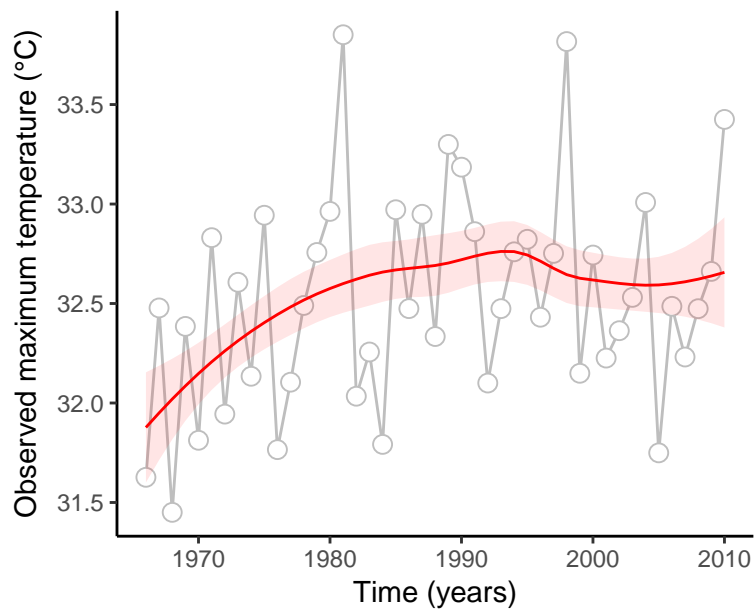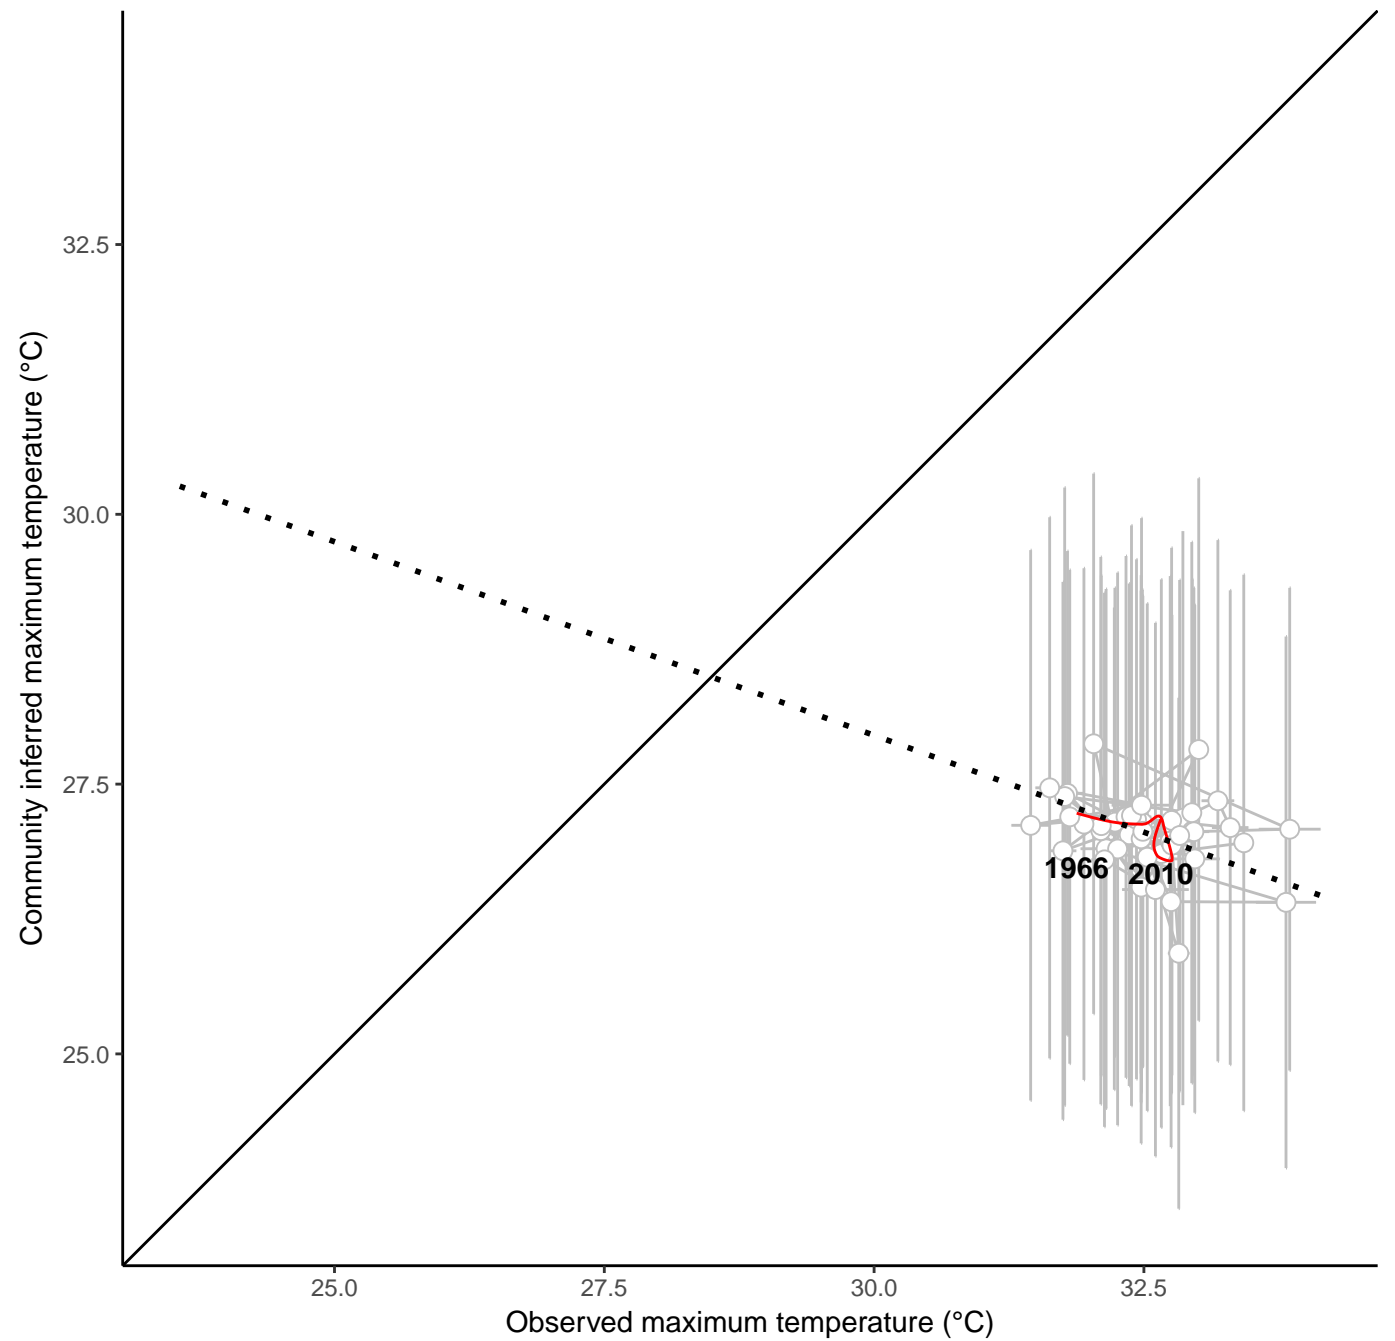

site : 840\_25\_31

absolute deviation = 4.44 | deviation change = 1.05 | maximum state number = 1

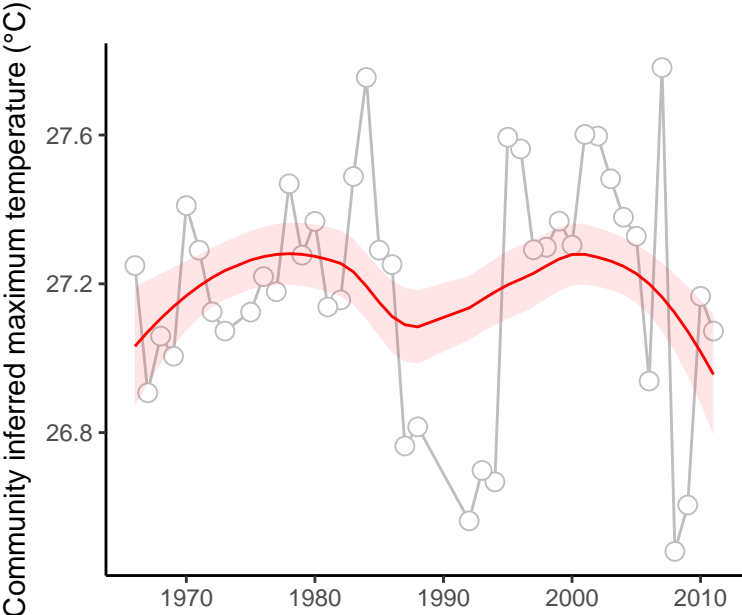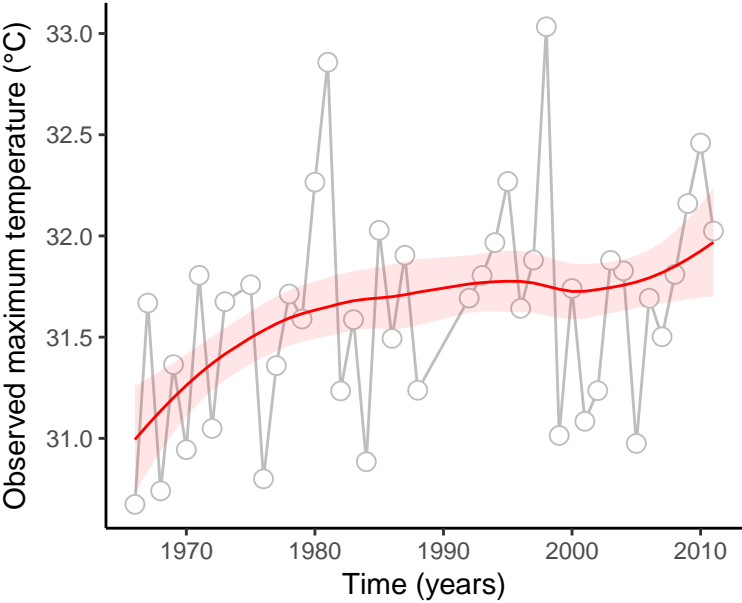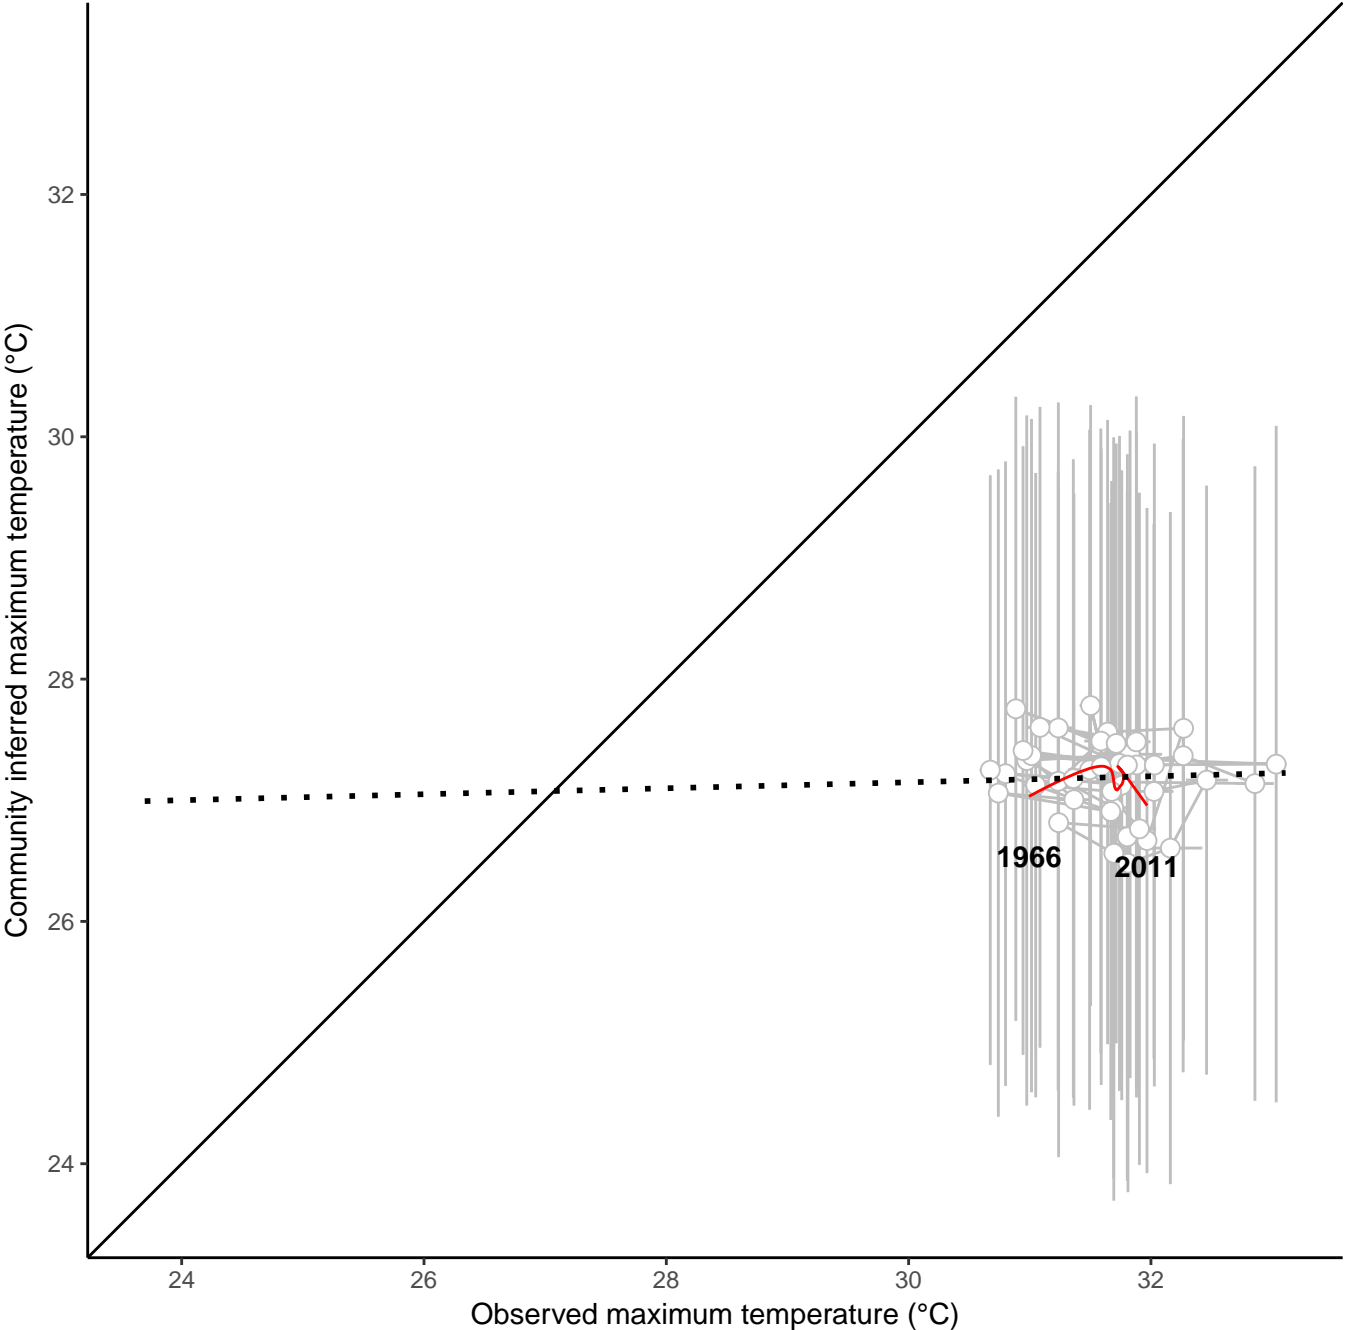

site : 840\_25\_37

absolute deviation = 5.4 | deviation change = 0.89 | maximum state number = 1

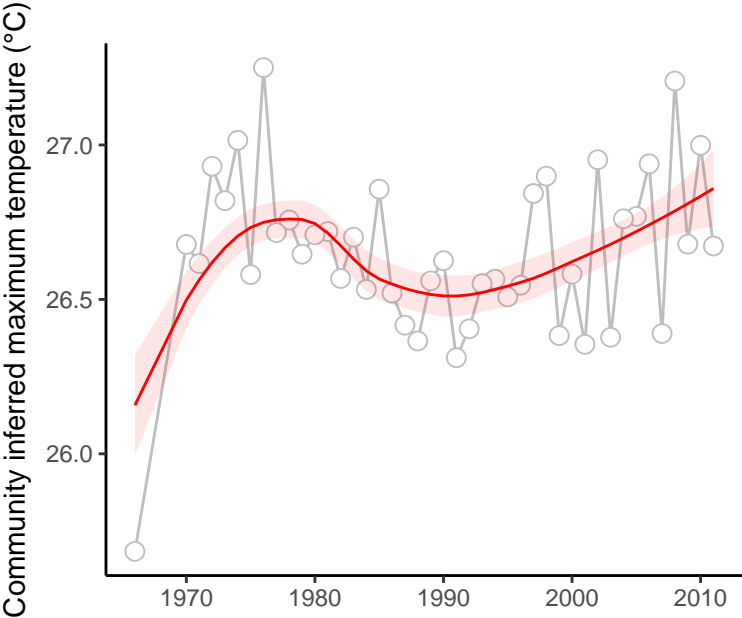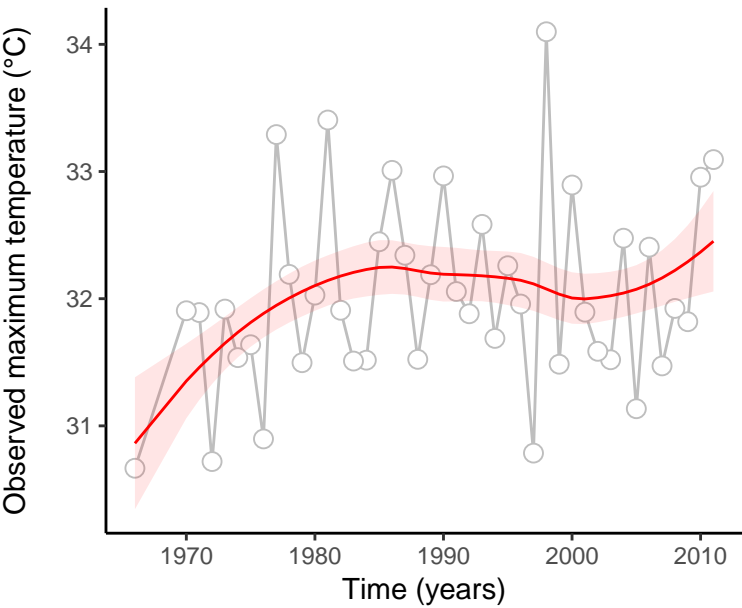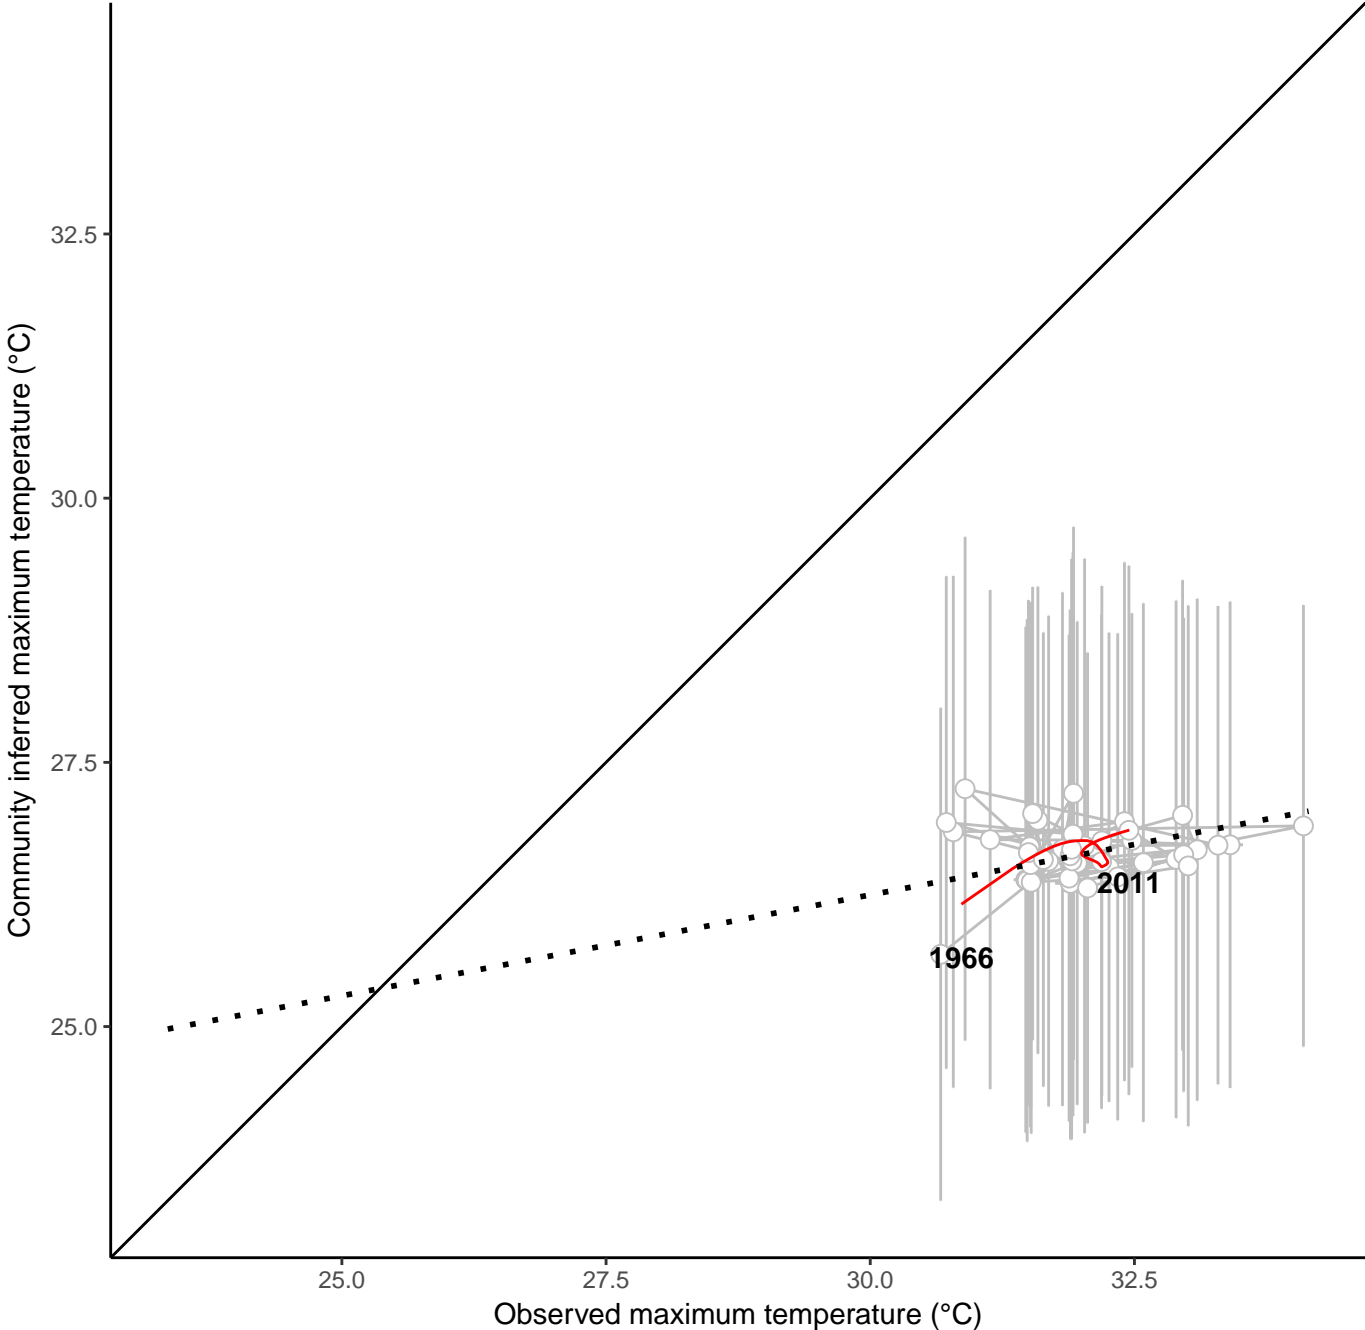

site : 840\_25\_4

absolute deviation = 4.93 | deviation change = 1.28 | maximum state number = 1

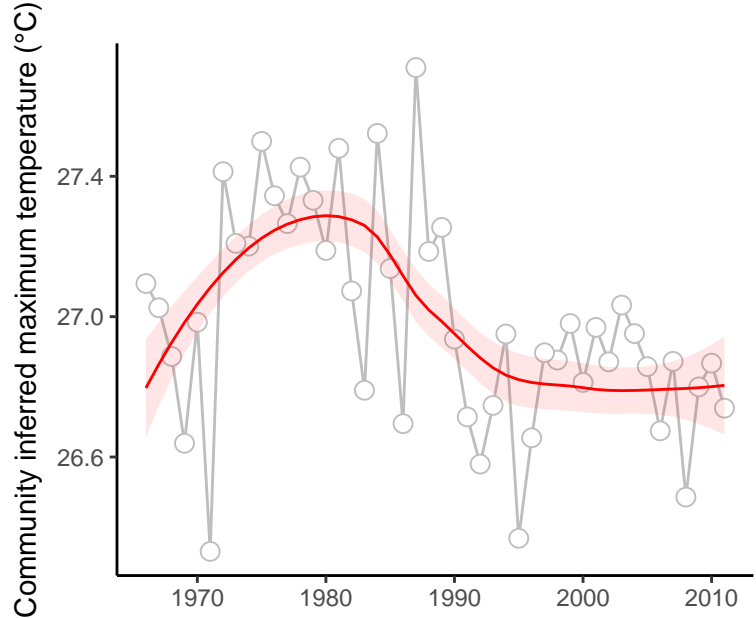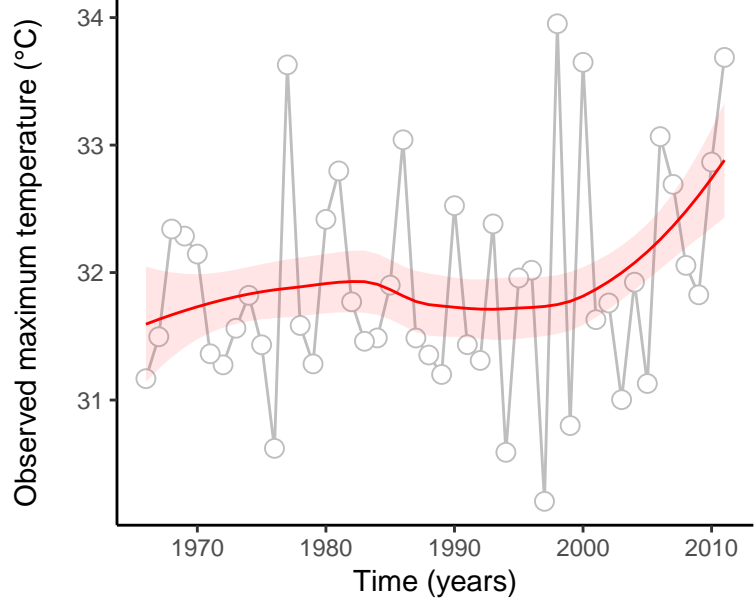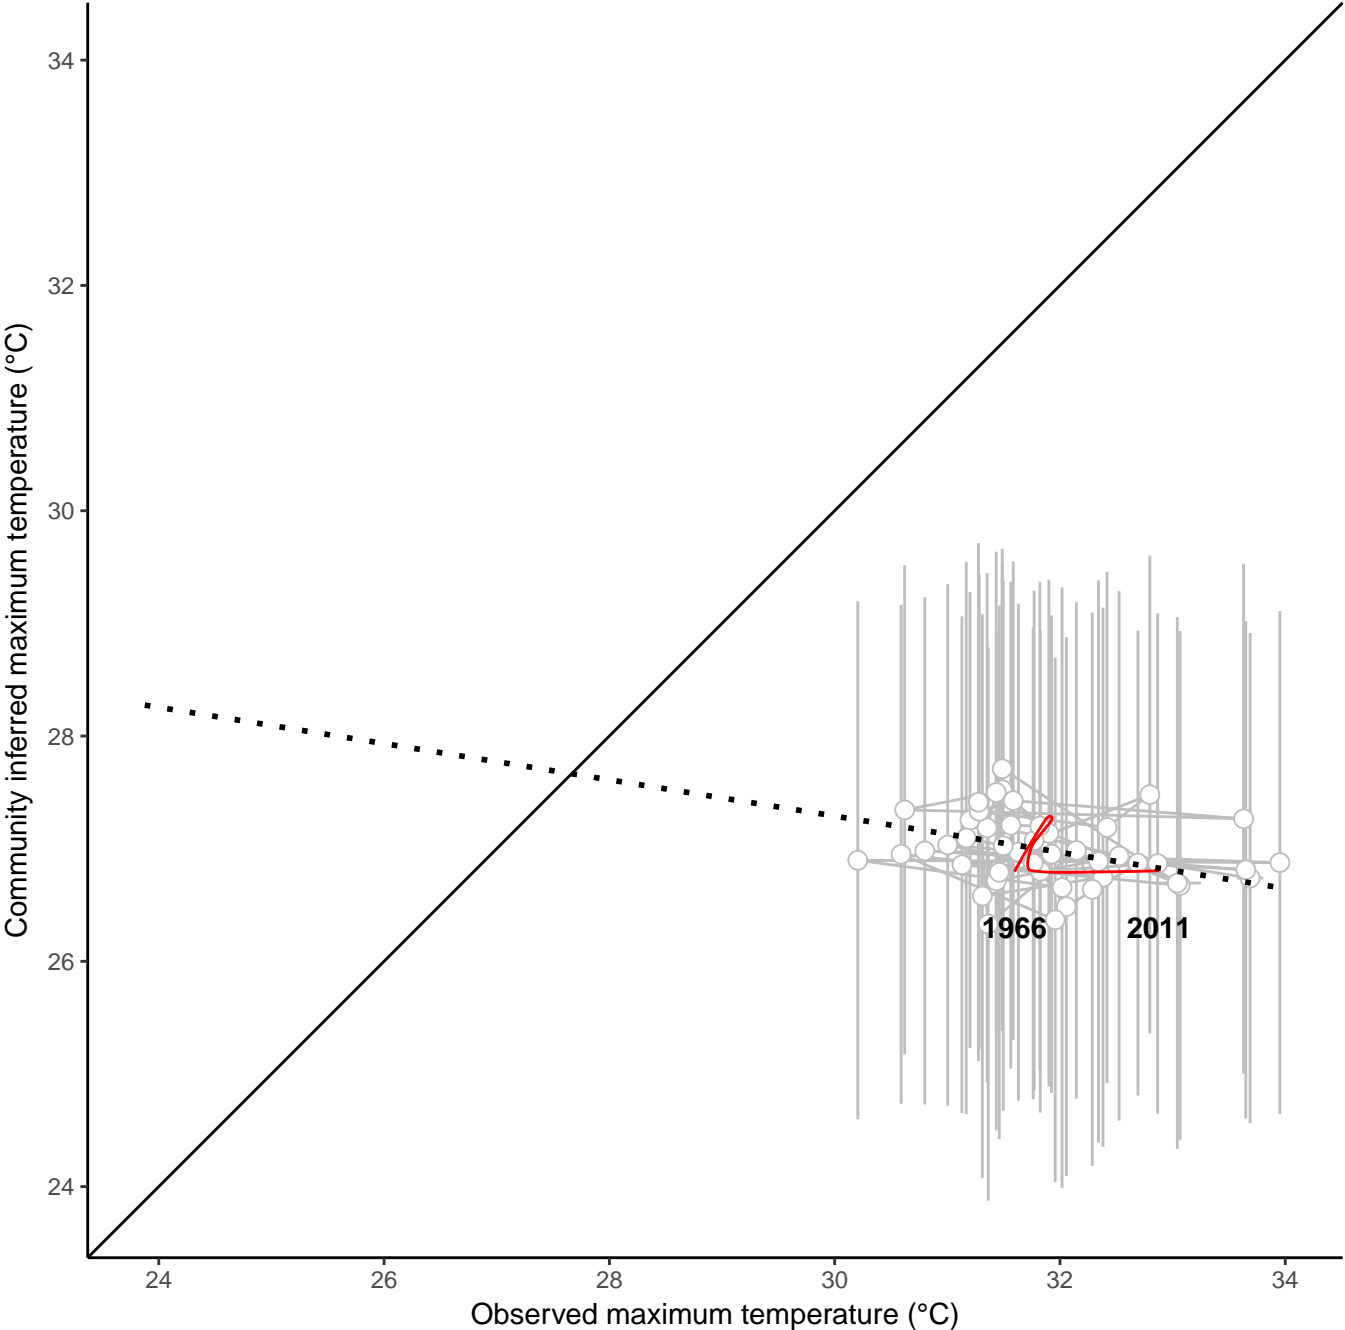

site : 840\_25\_6

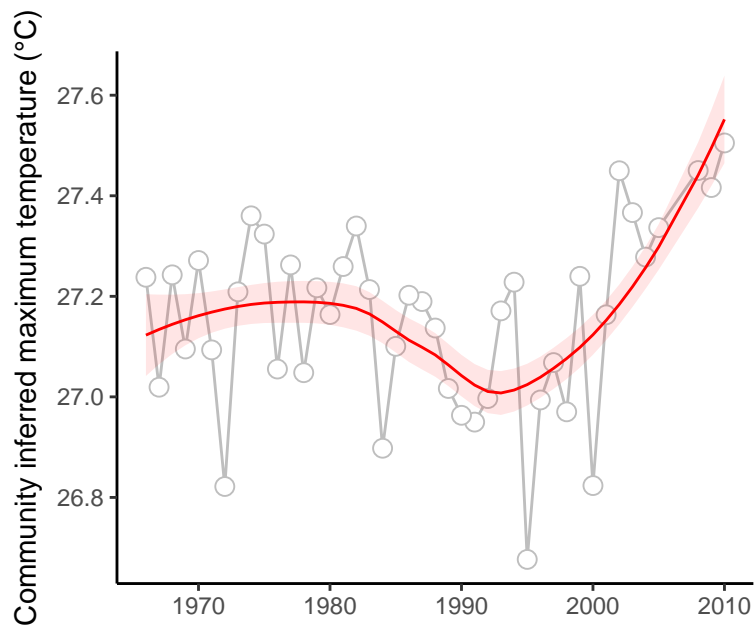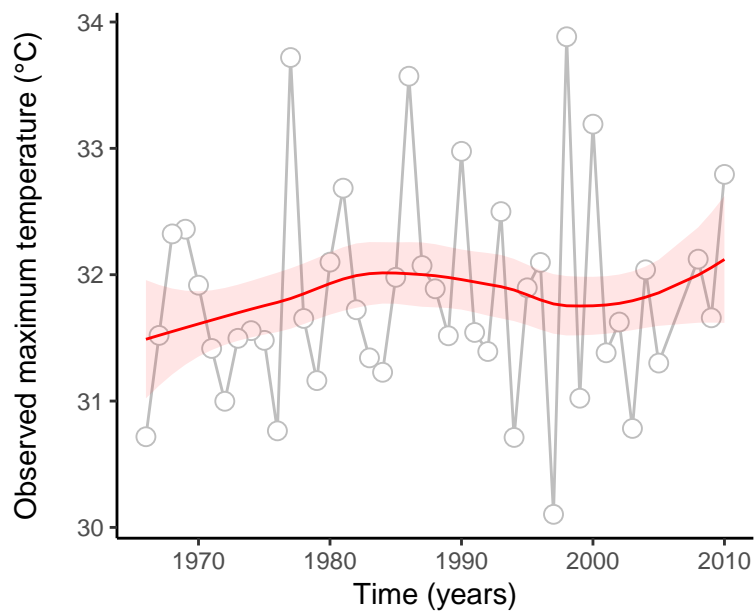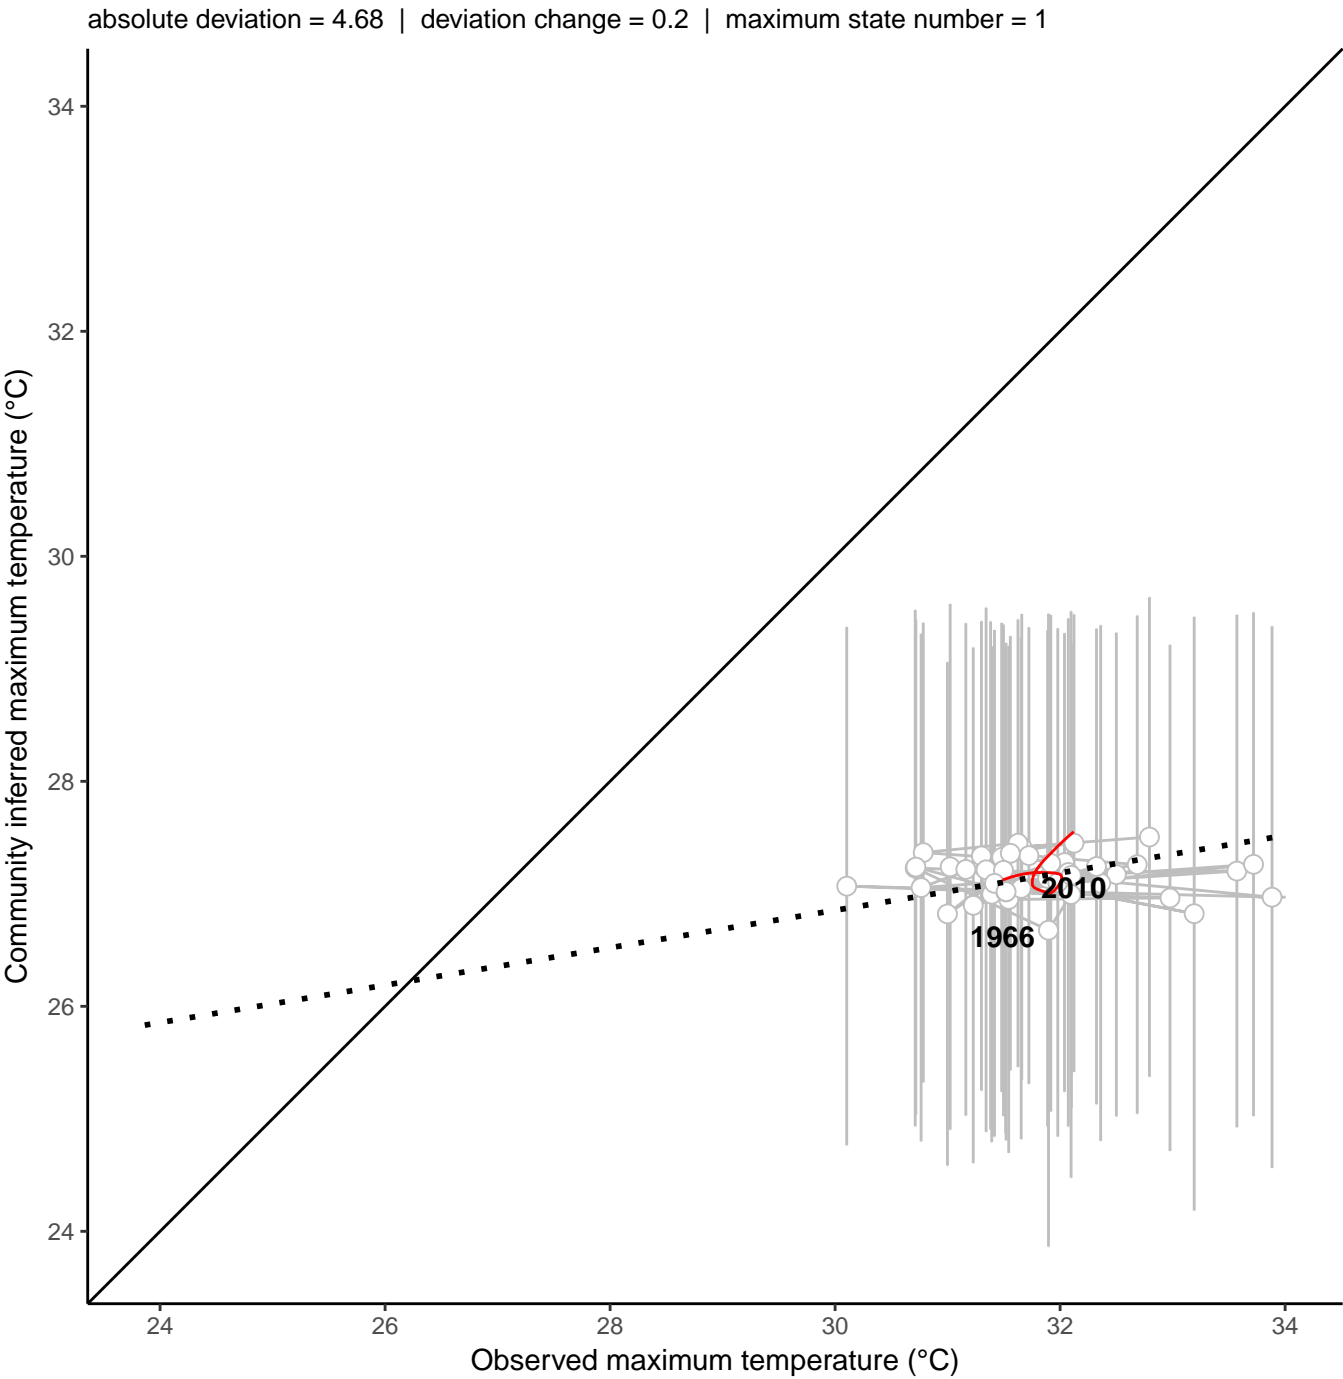

site : 840\_34\_24

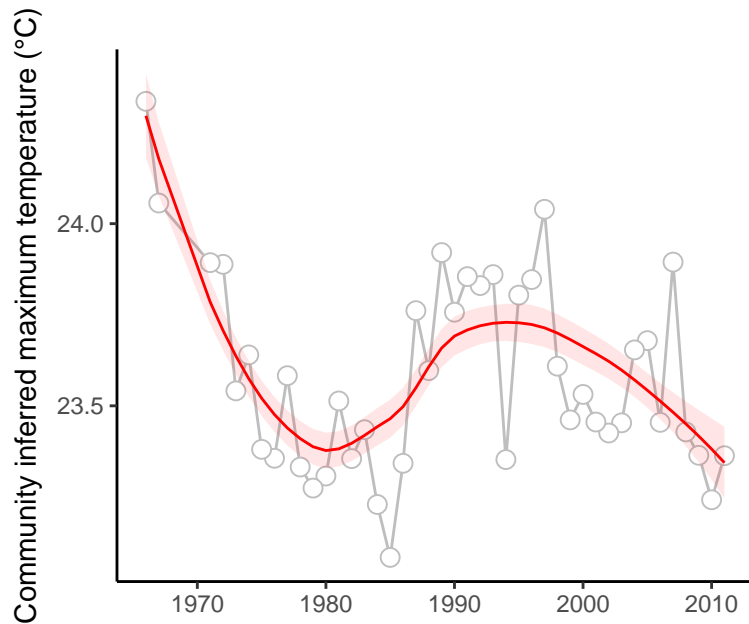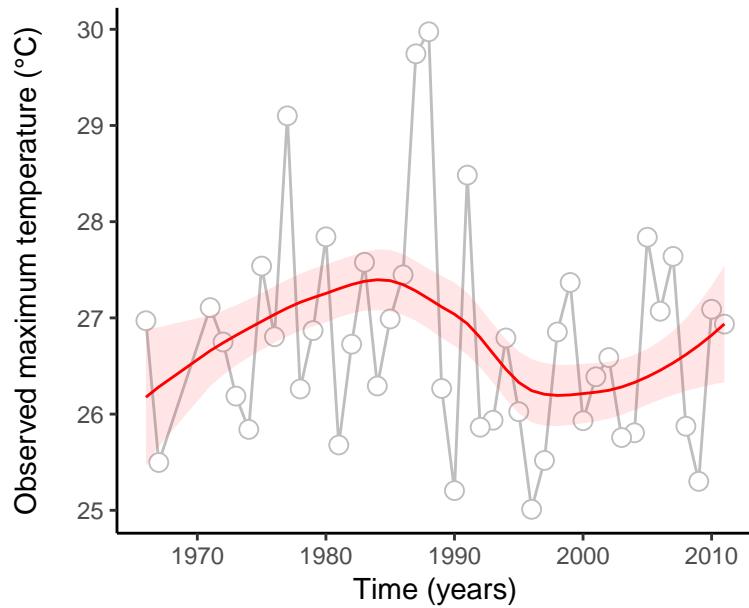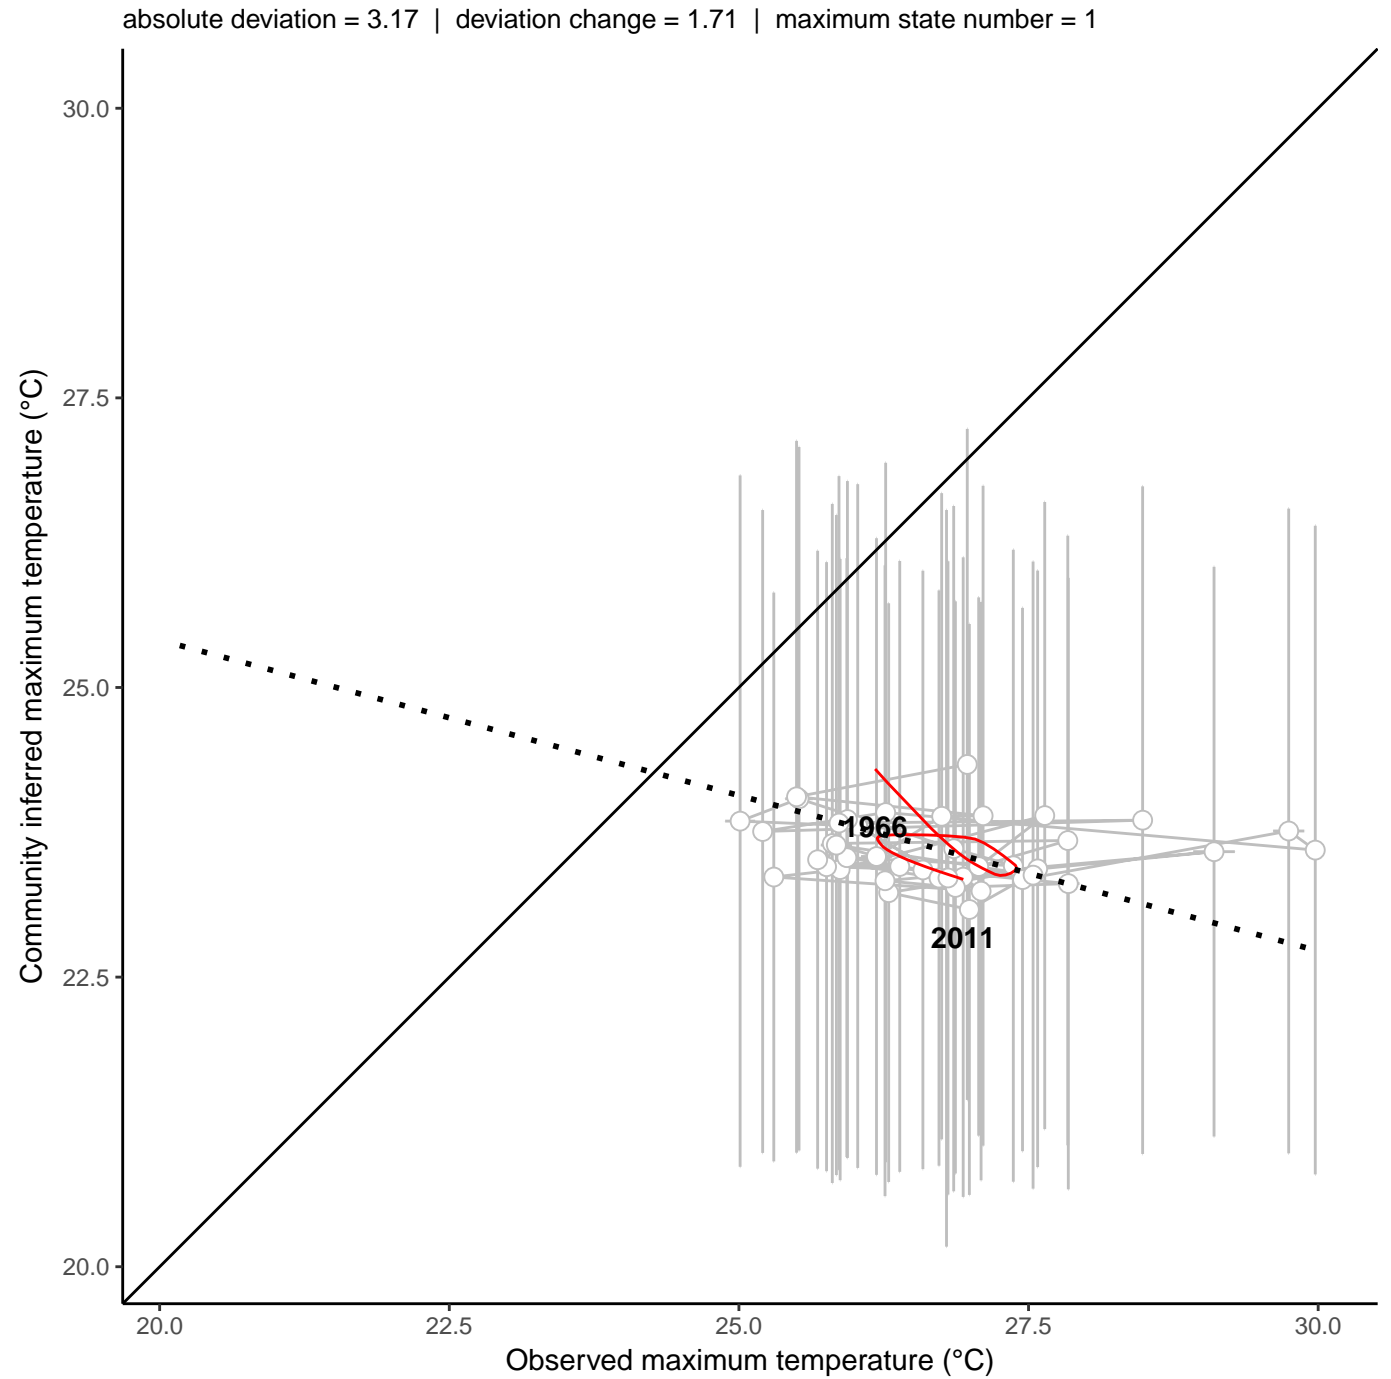



site : 840\_34\_6

absolute deviation = 2.34 | deviation change = -0.15 | maximum state number = 1

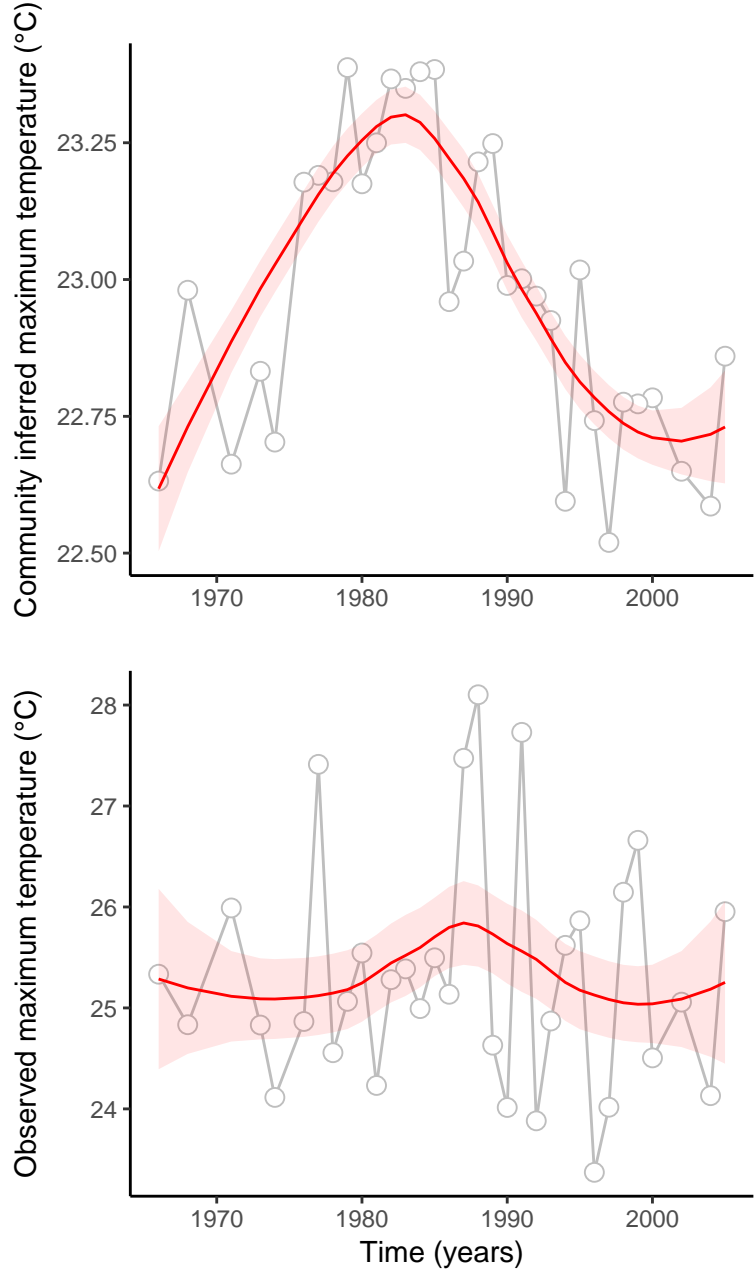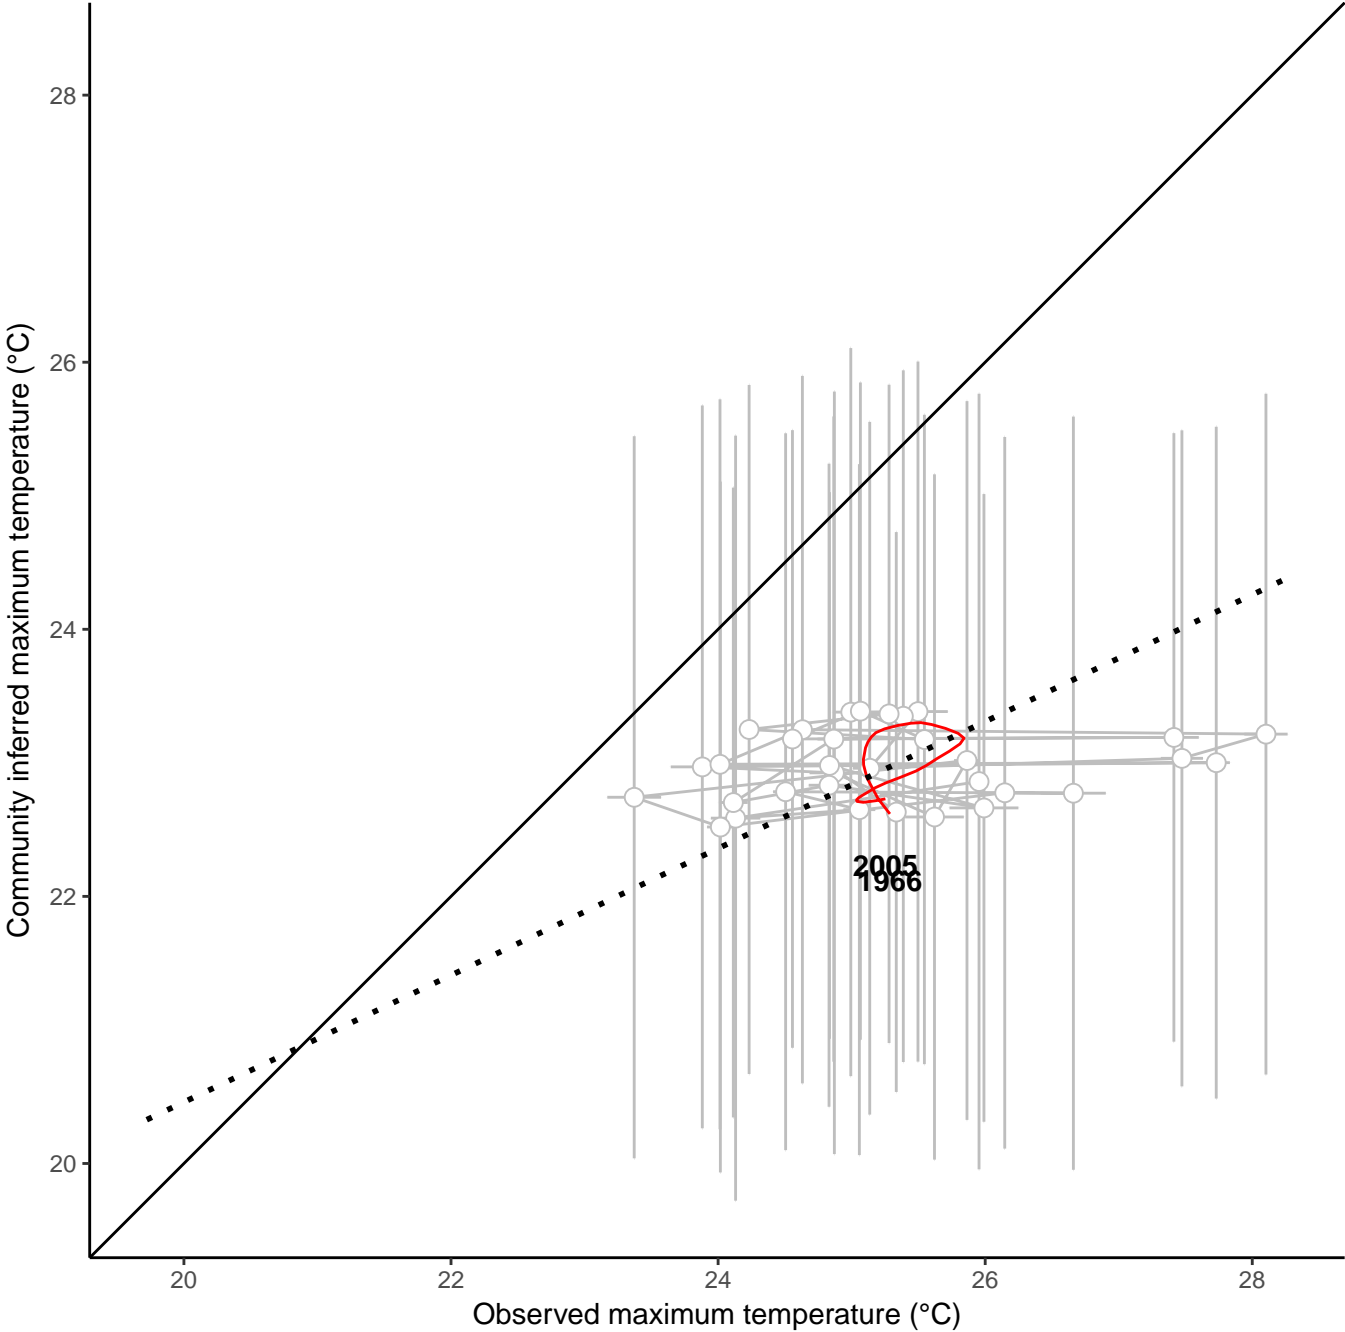

site : 840\_35\_22

absolute deviation = 3.12 | deviation change = 0.27 | maximum state number = 1

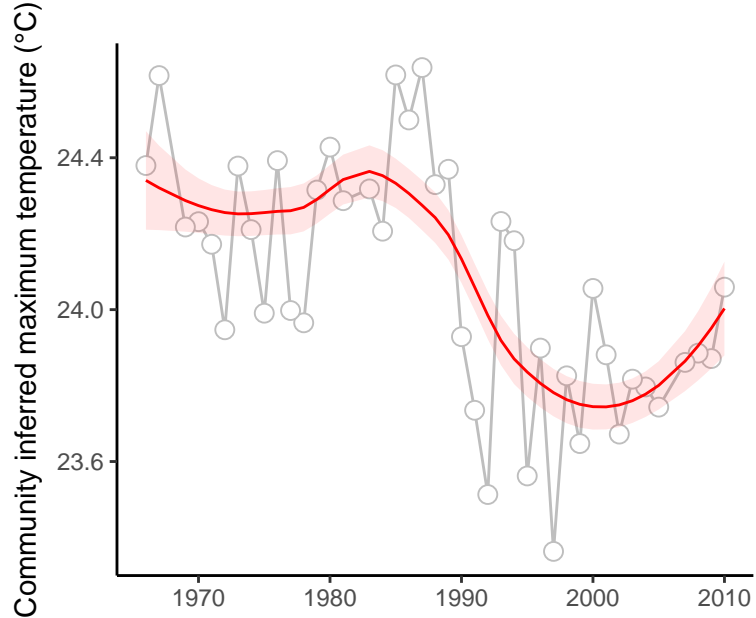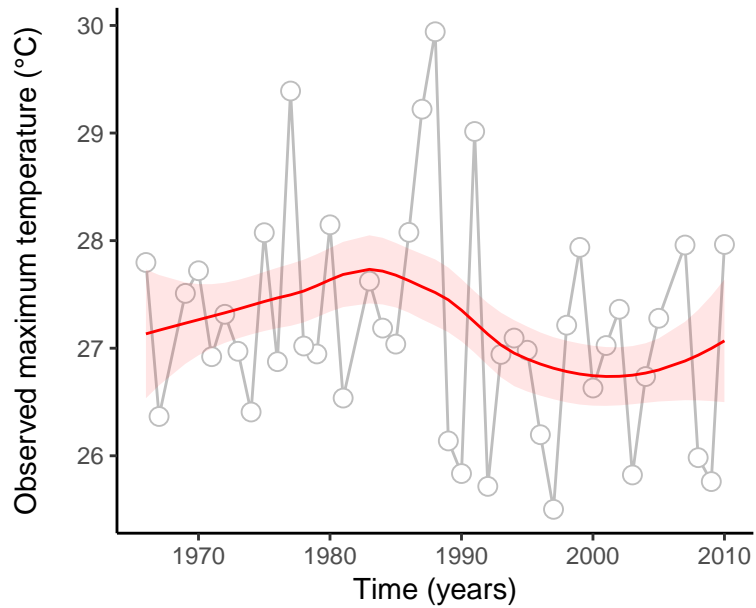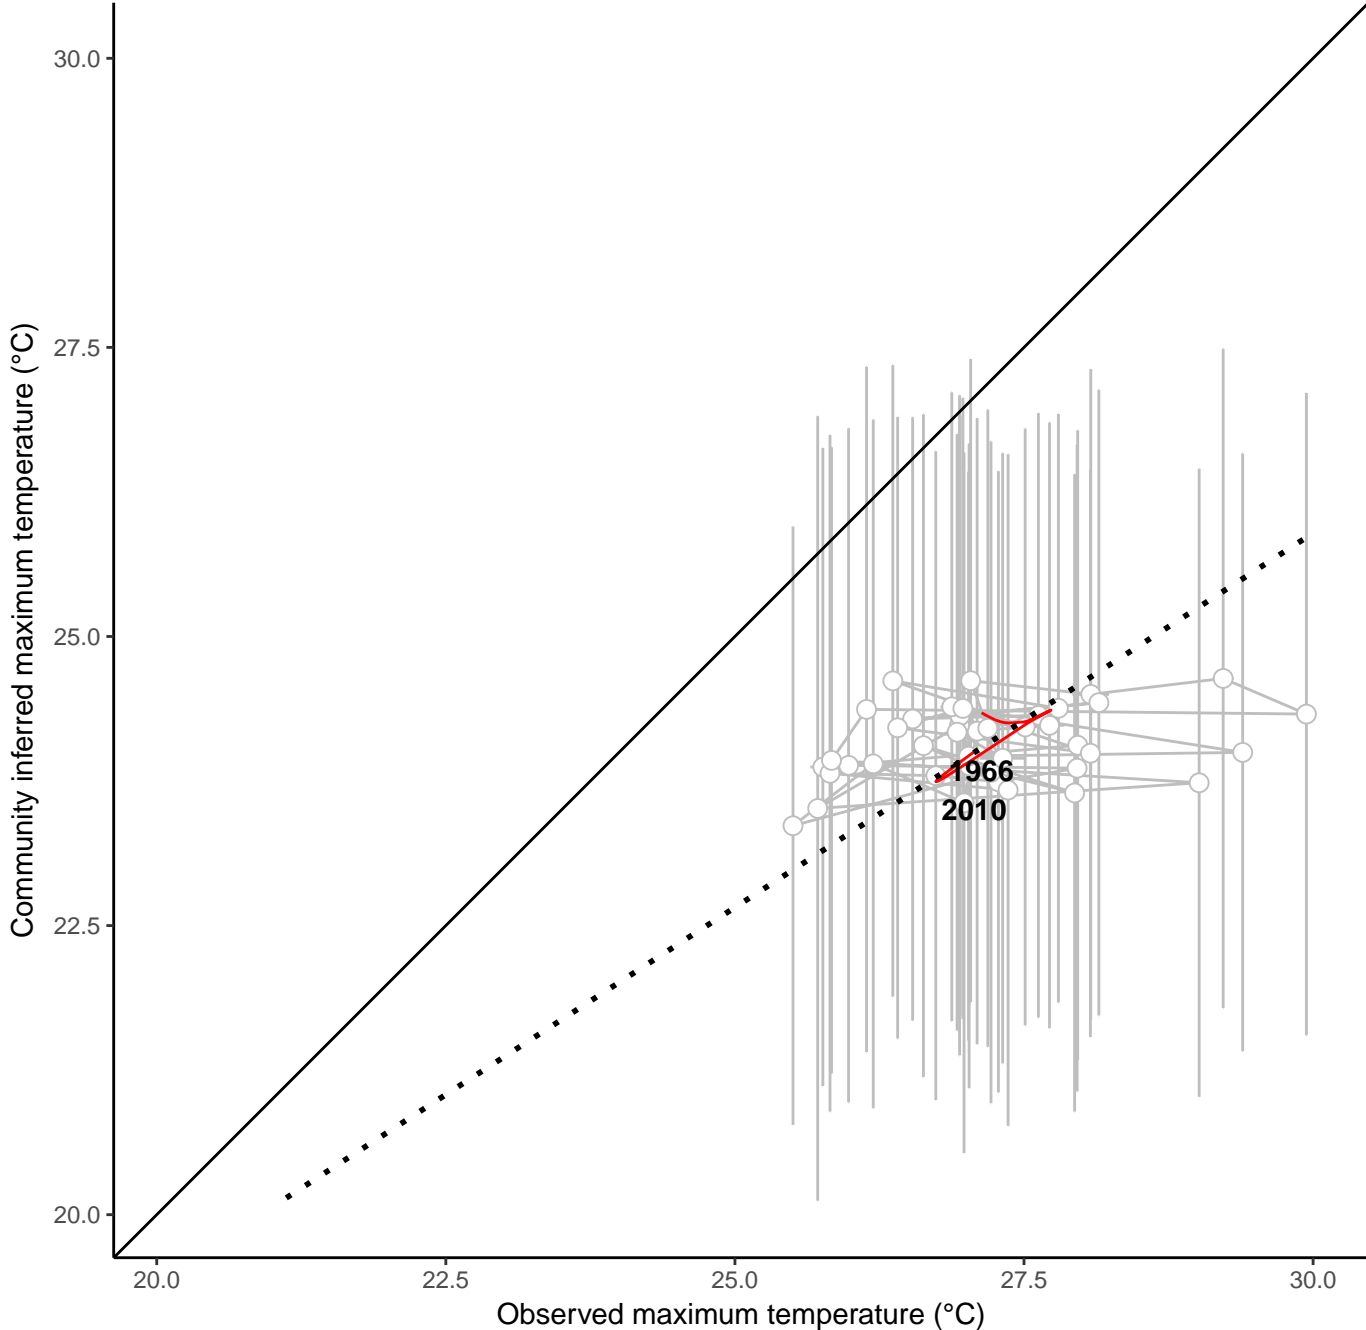

site : 840\_46\_12

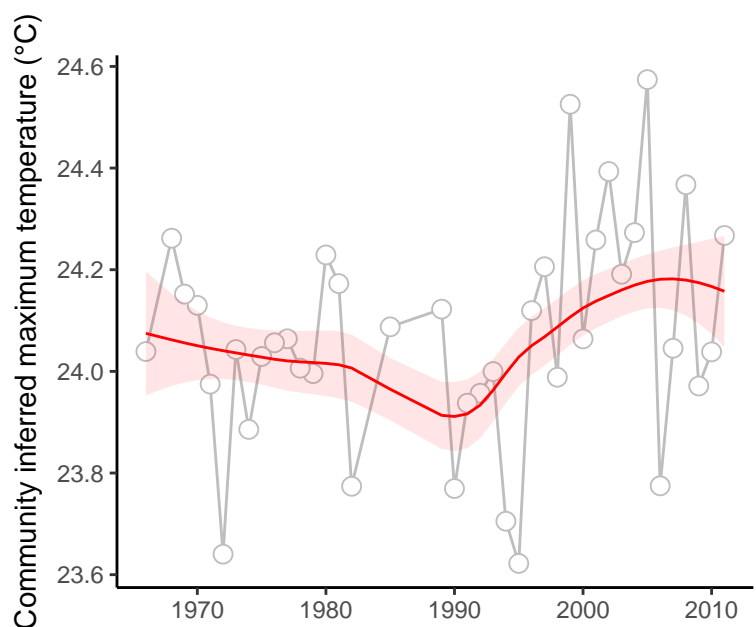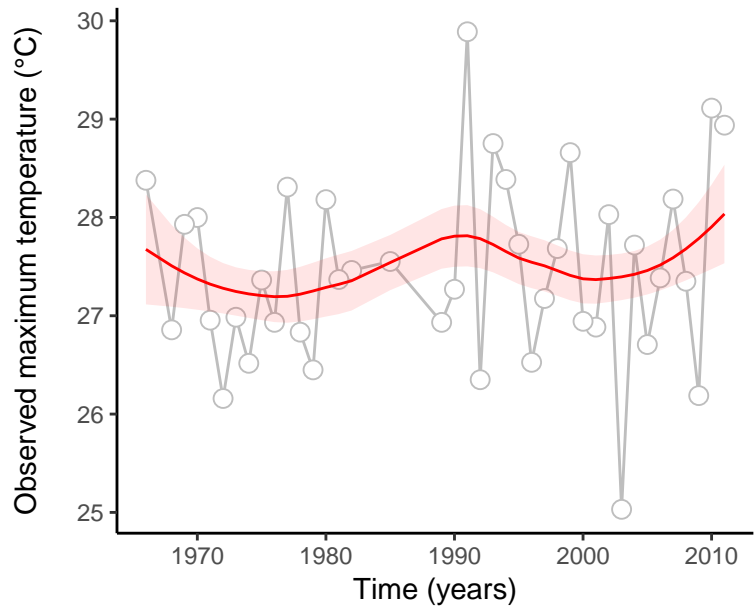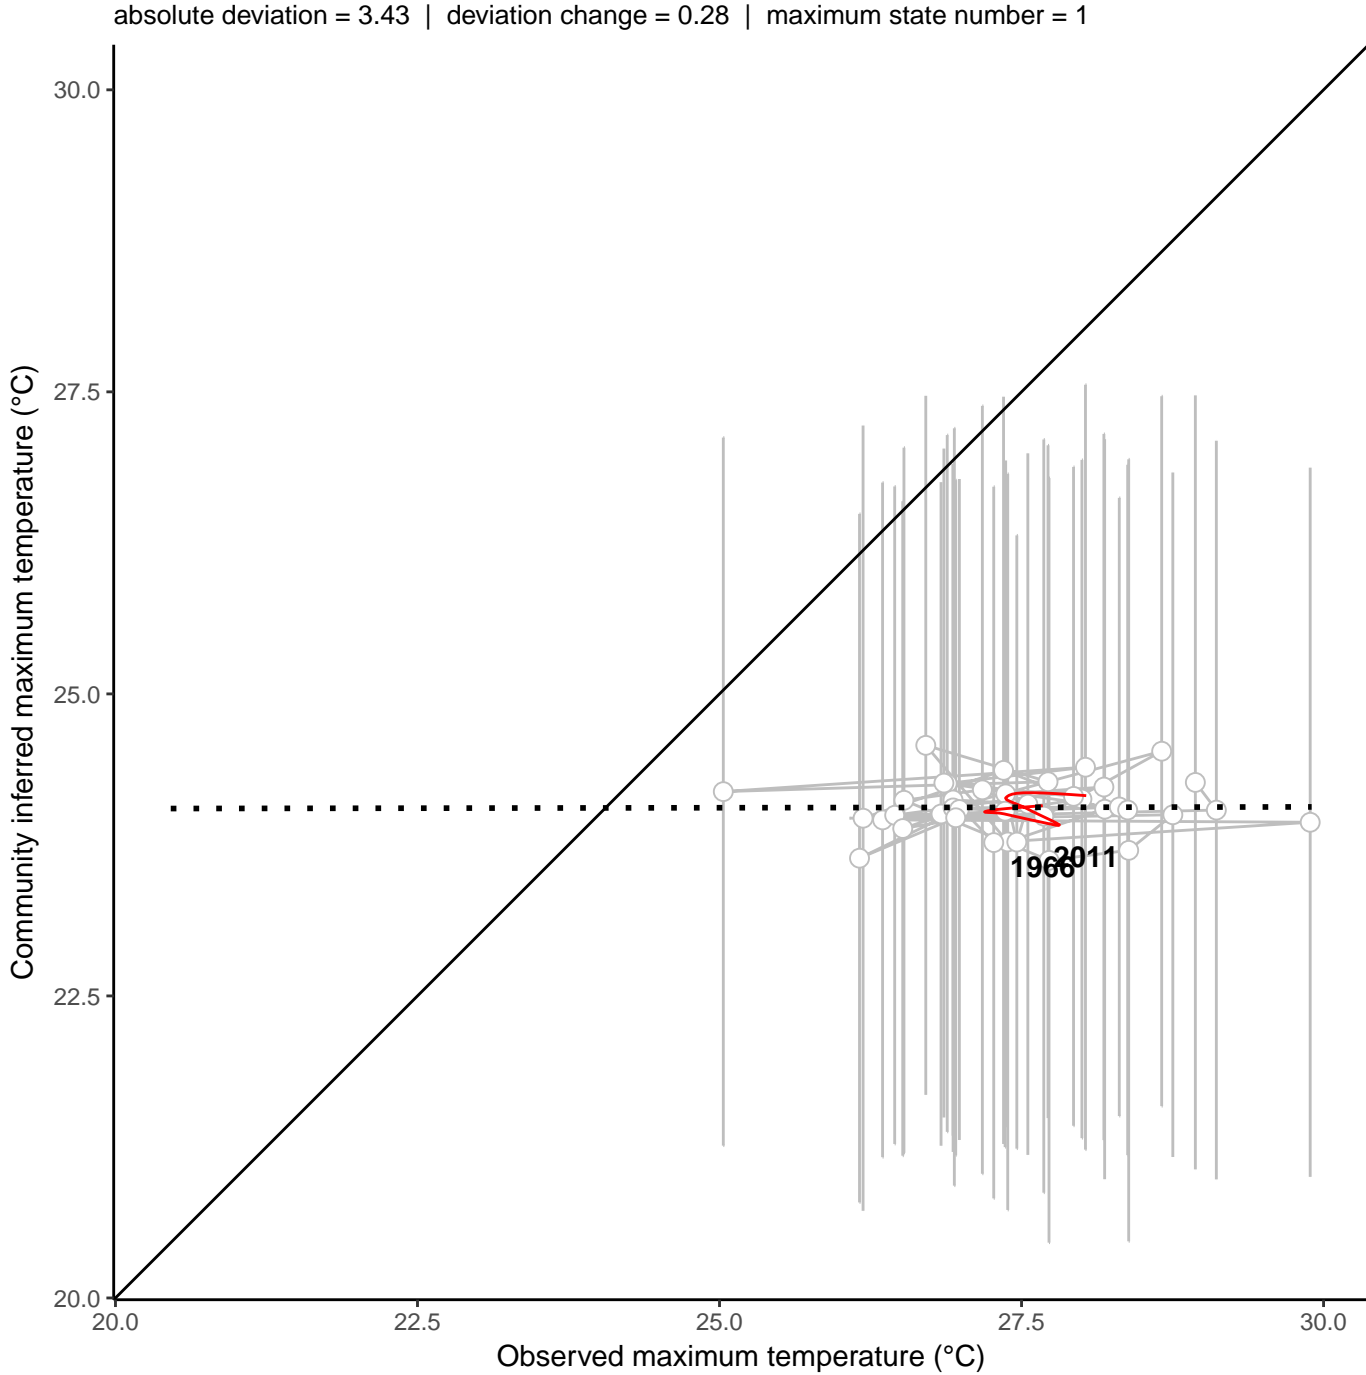

site : 840\_46\_19

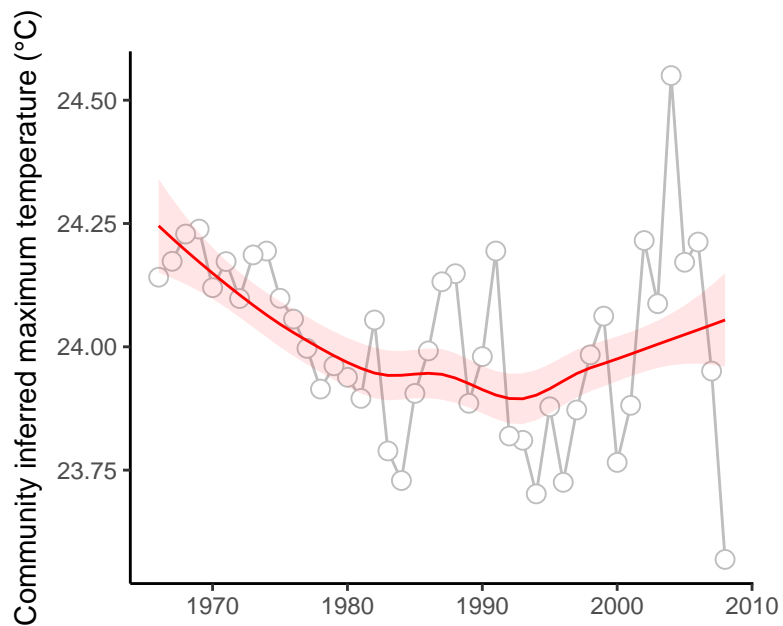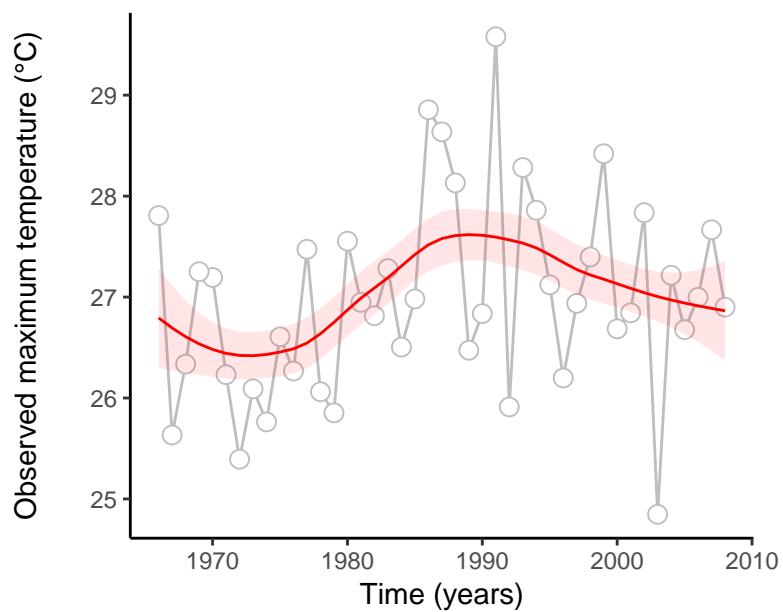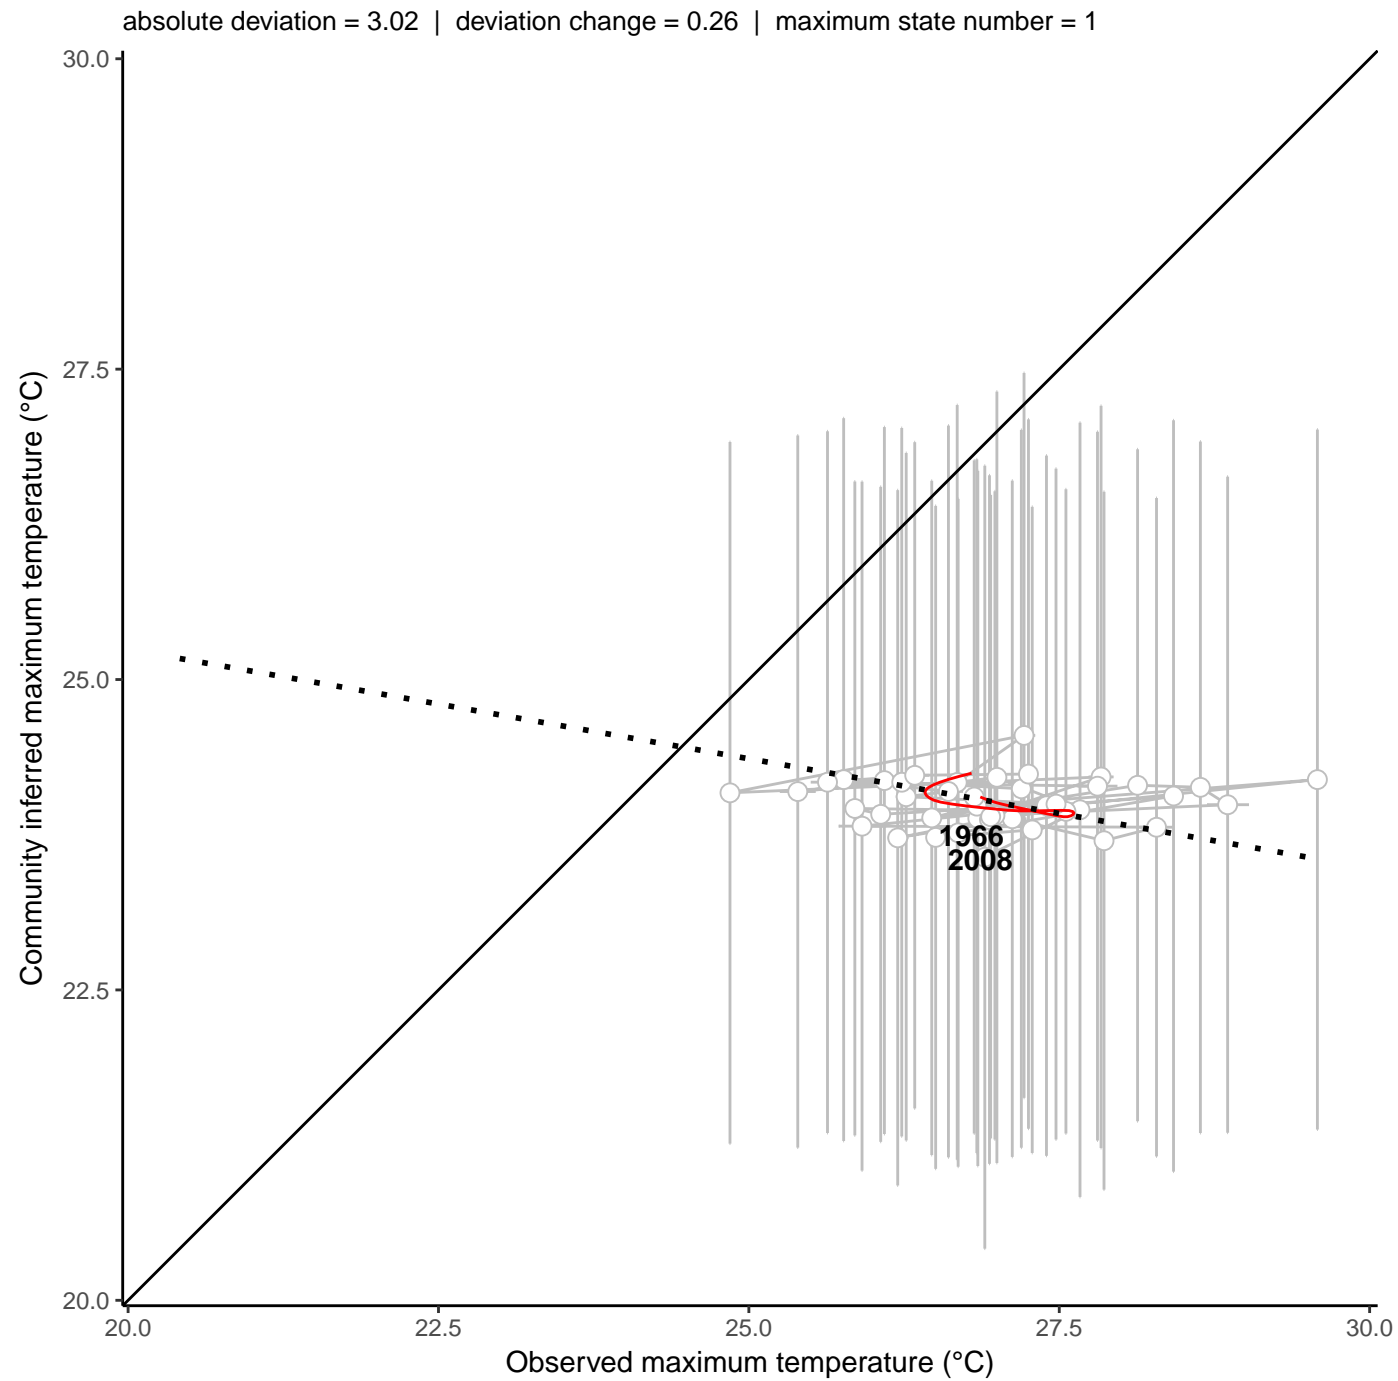

site : 840\_46\_38

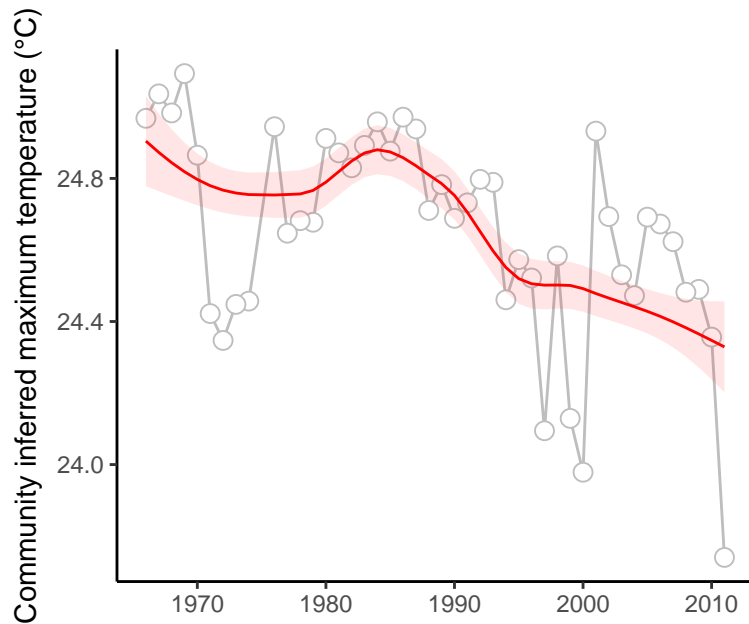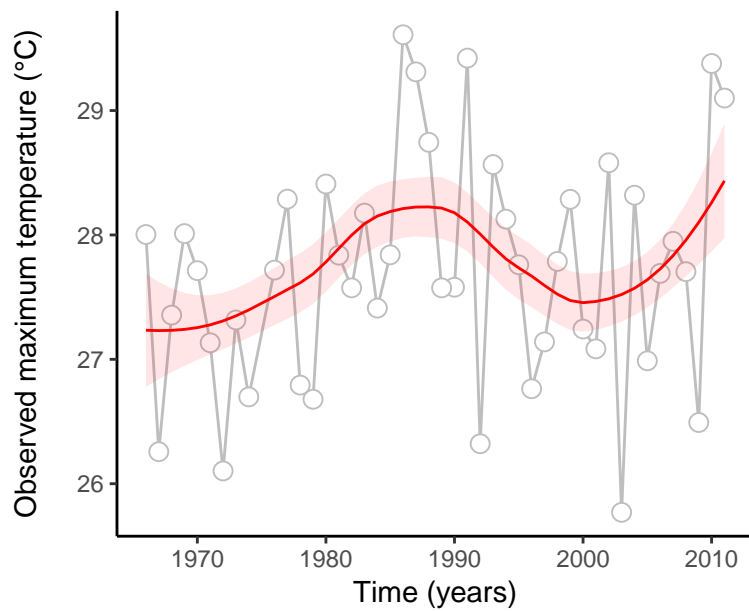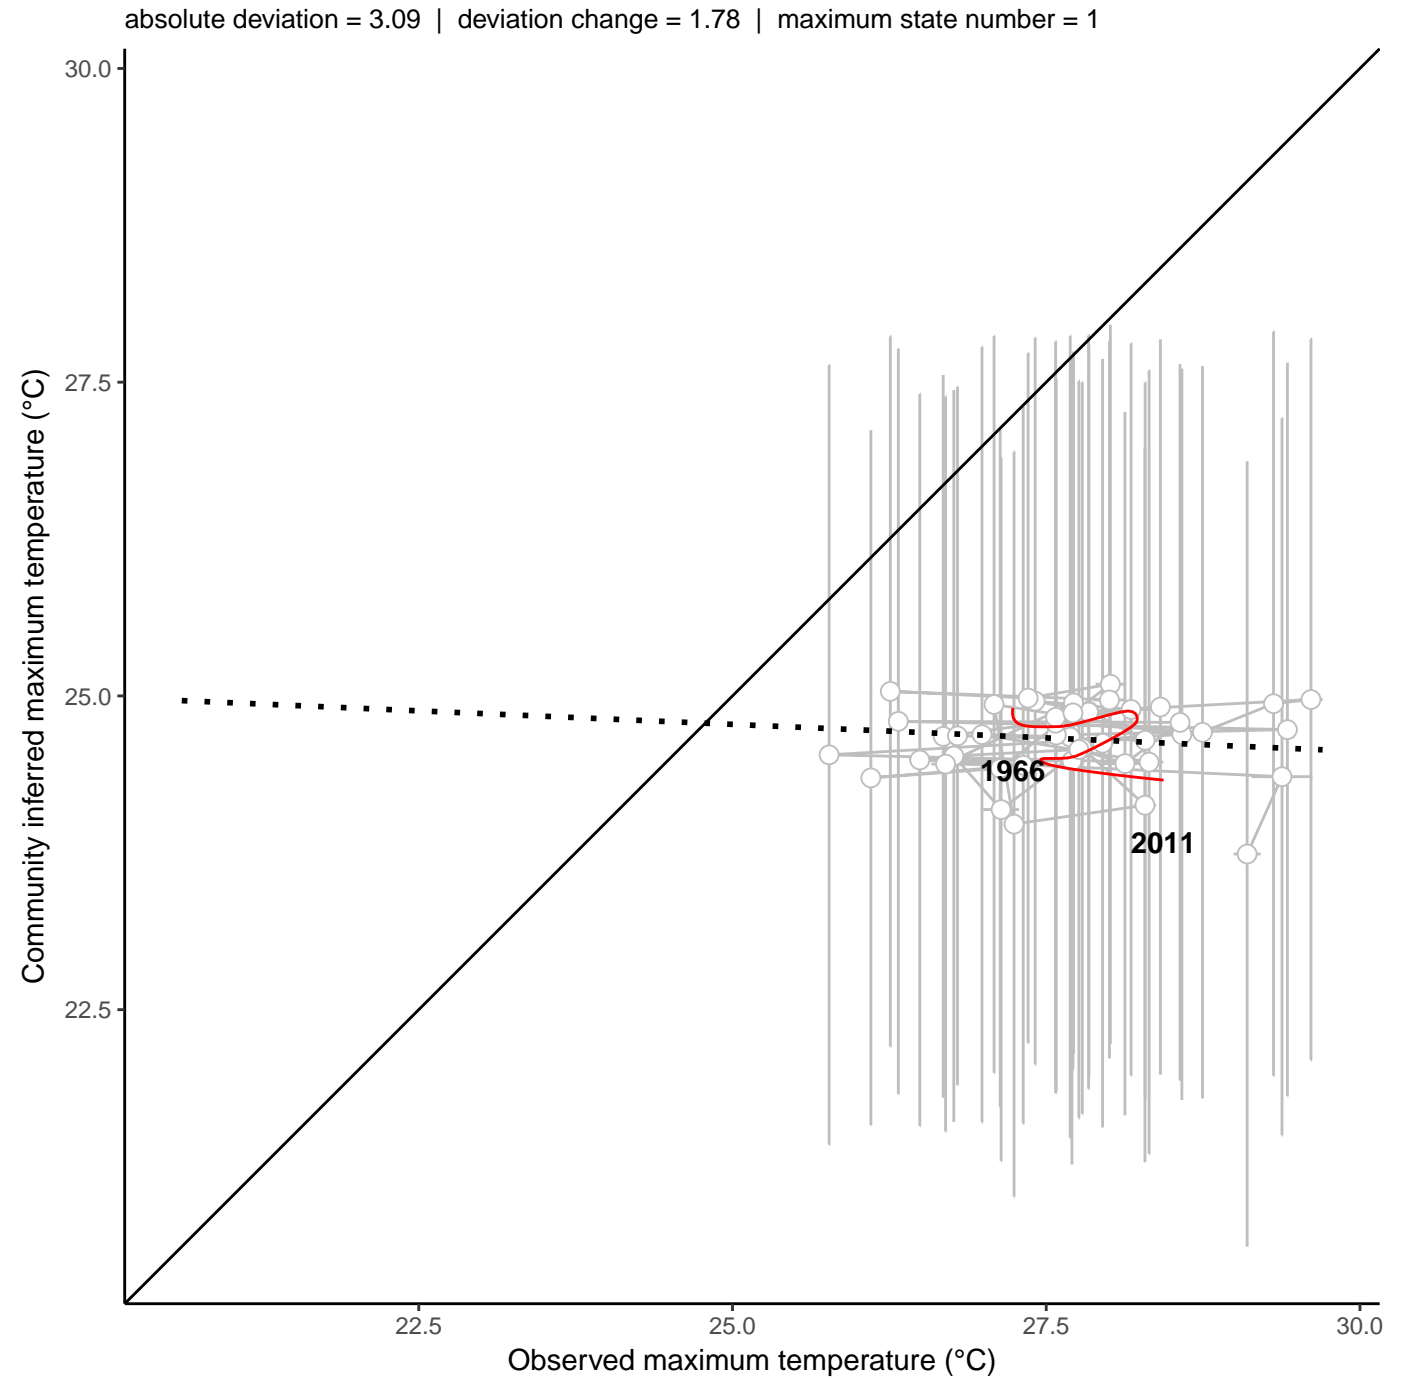

site : 840\_46\_43

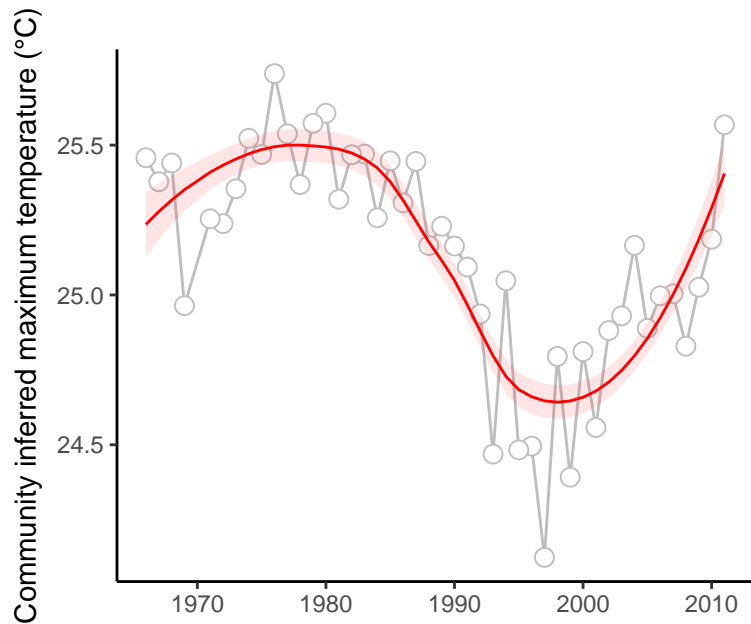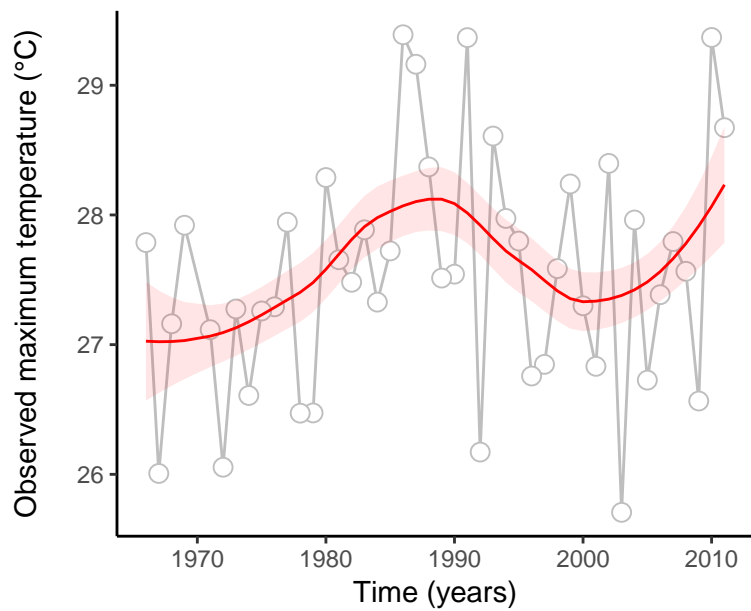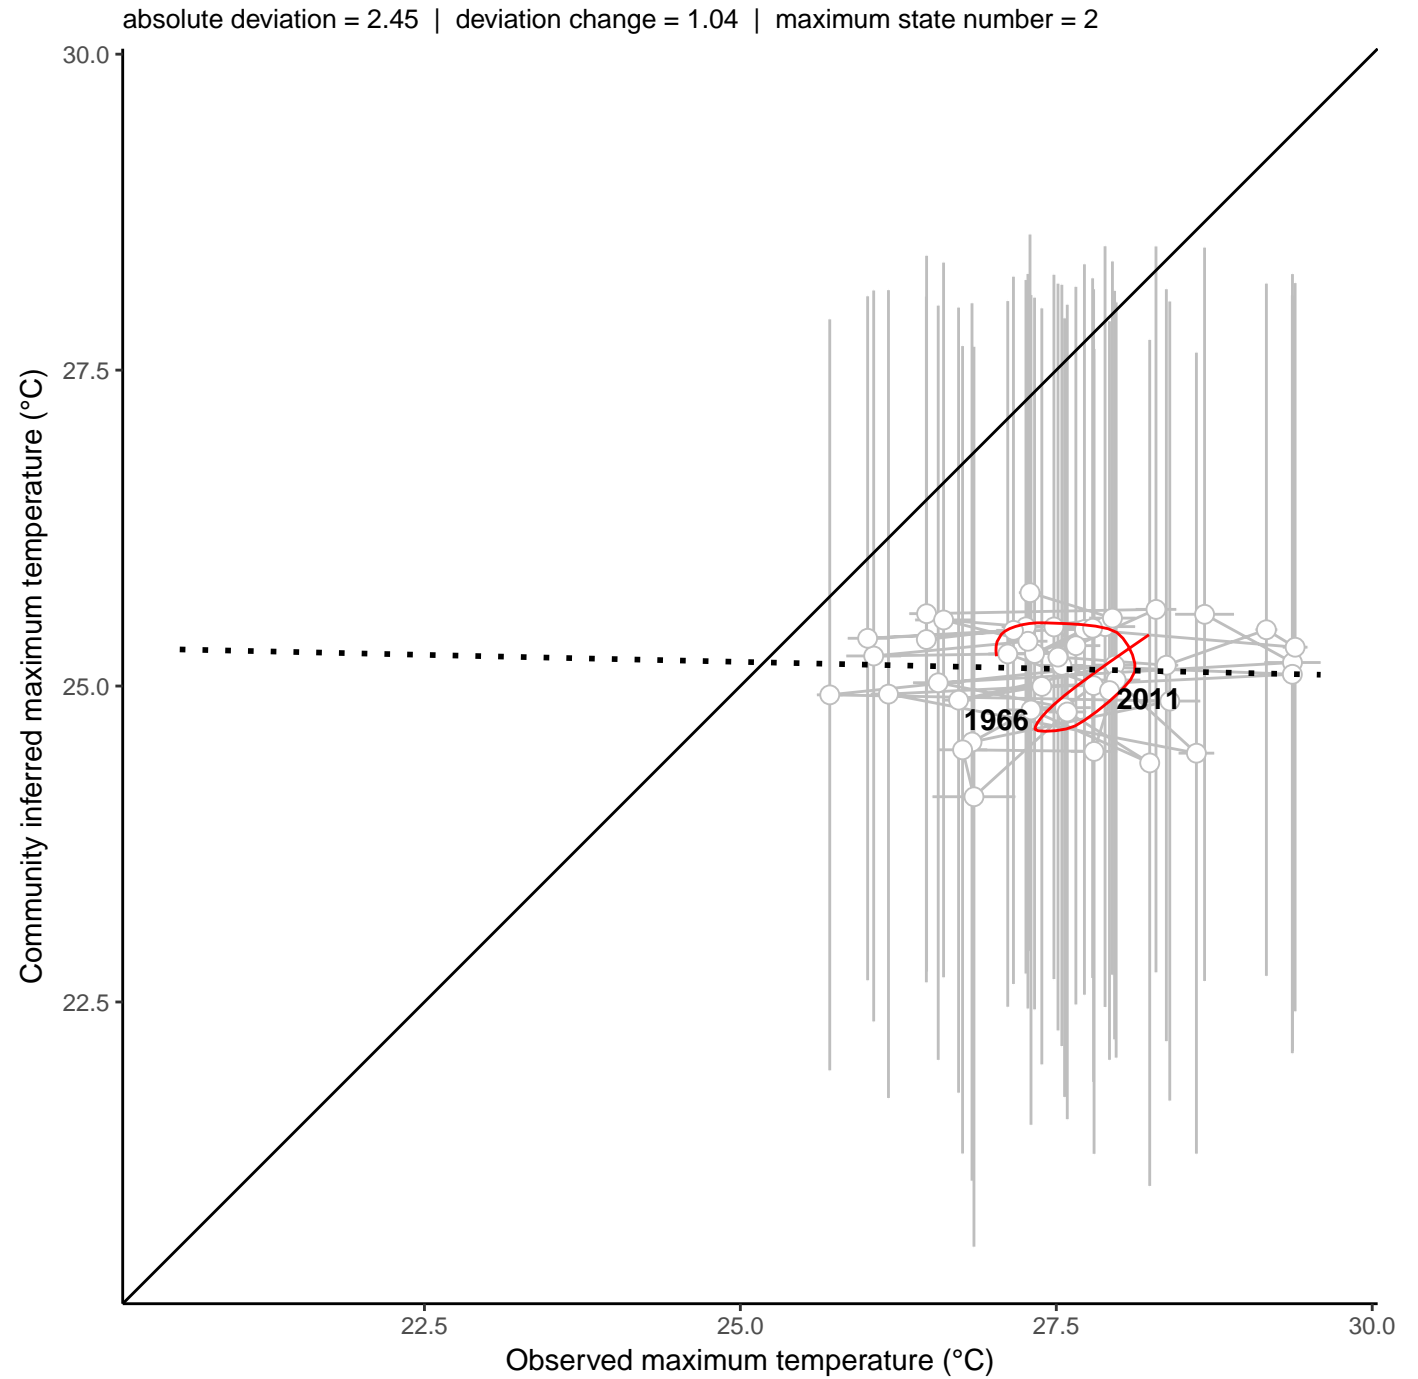

site : 840\_80\_7

absolute deviation = 4.6 | deviation change = 0.76 | maximum state number = 1

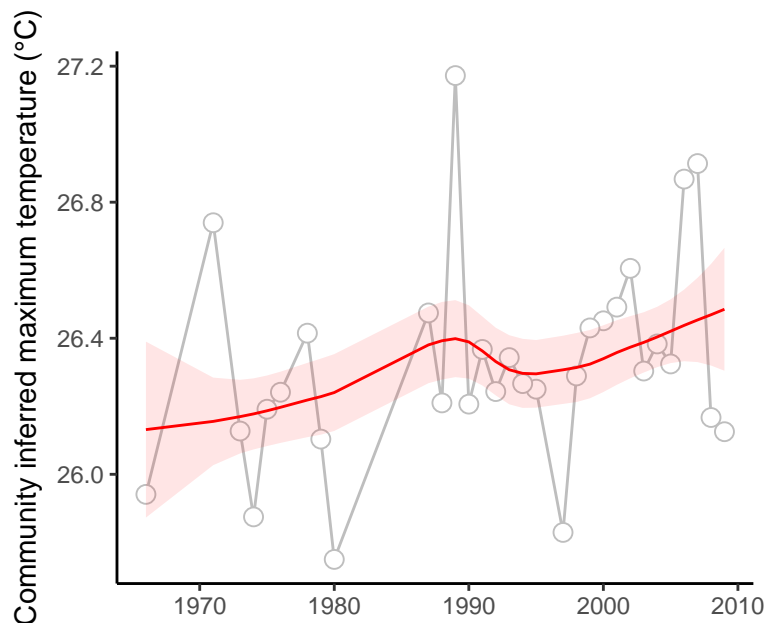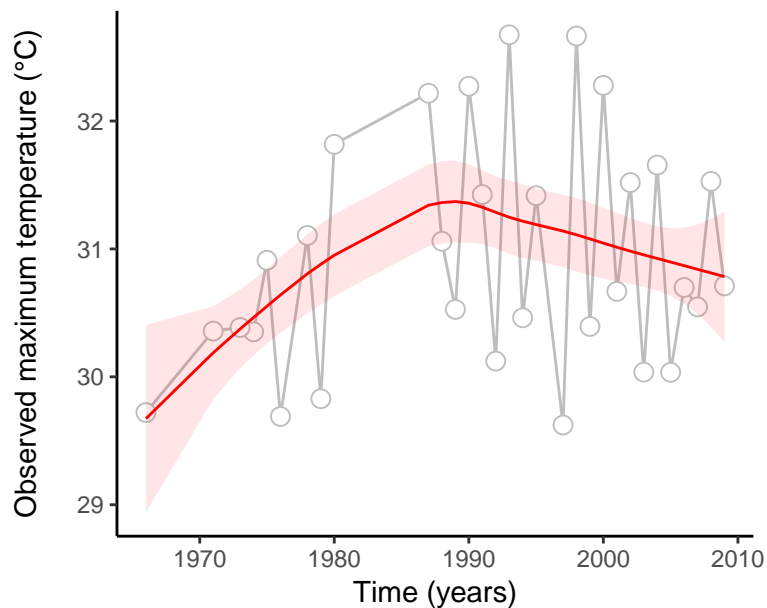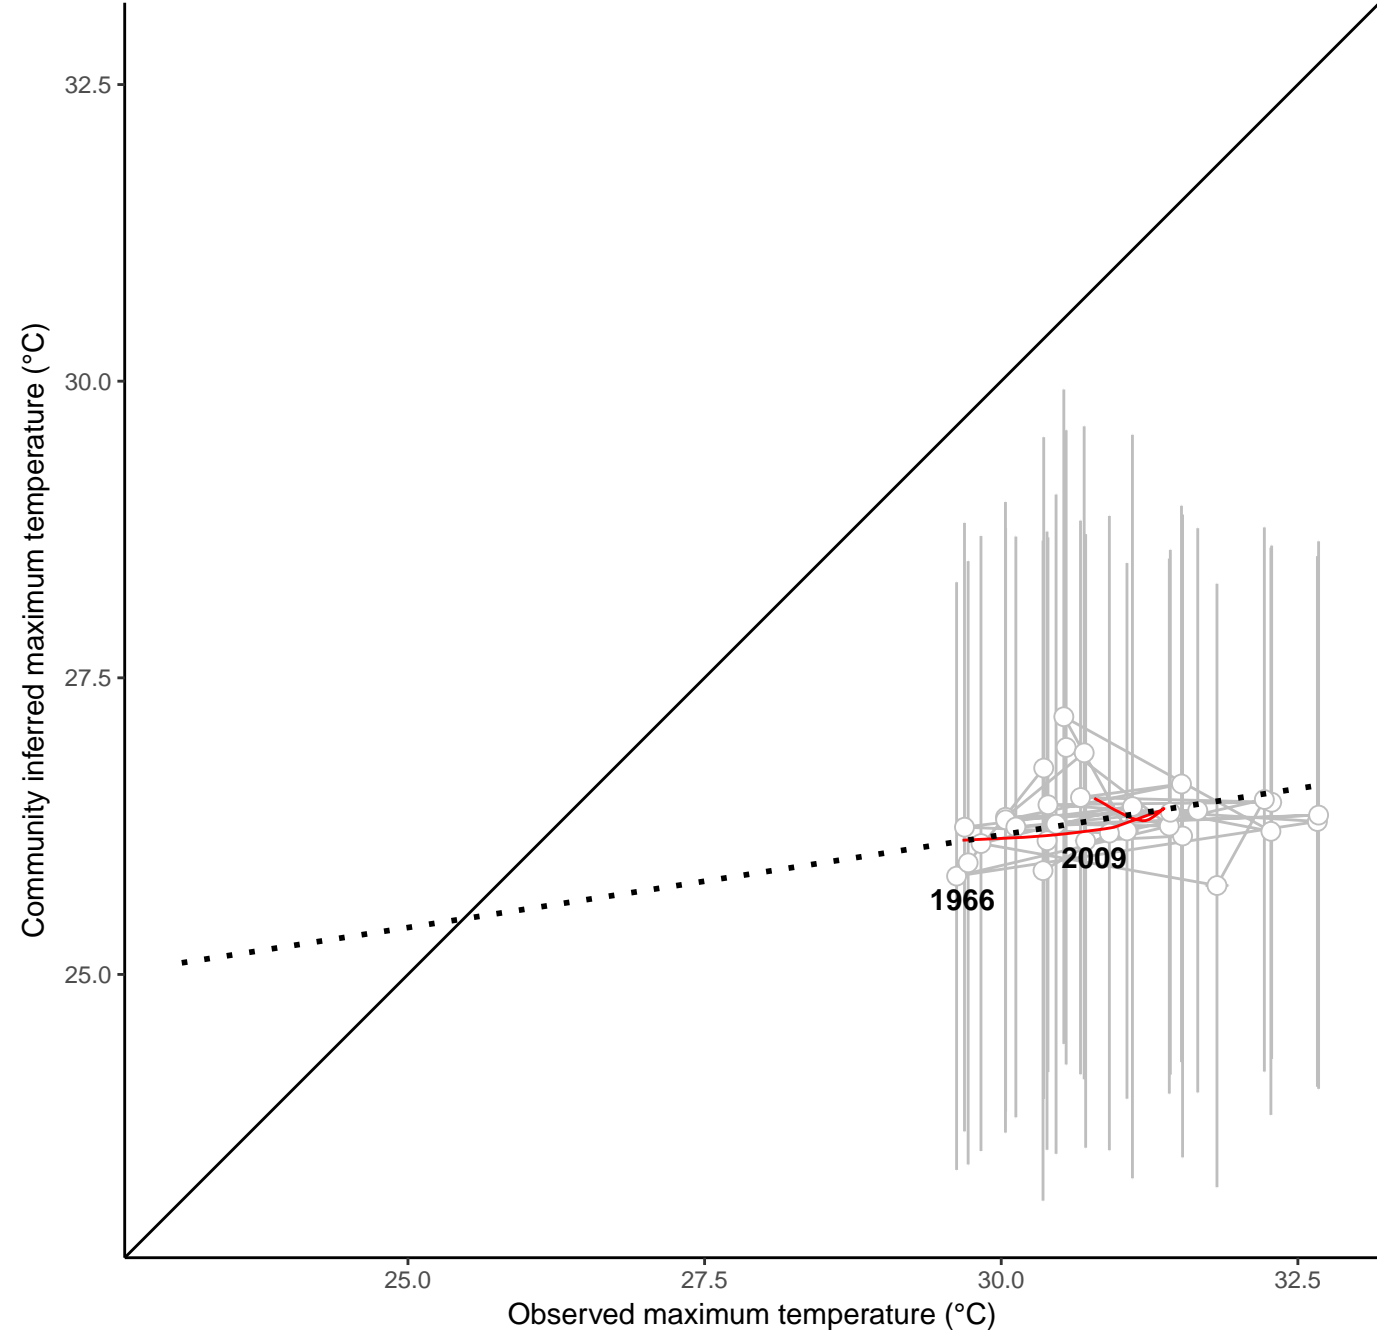

site : 840\_82\_3

absolute deviation = 4.33 | deviation change = 0.12 | maximum state number = 1

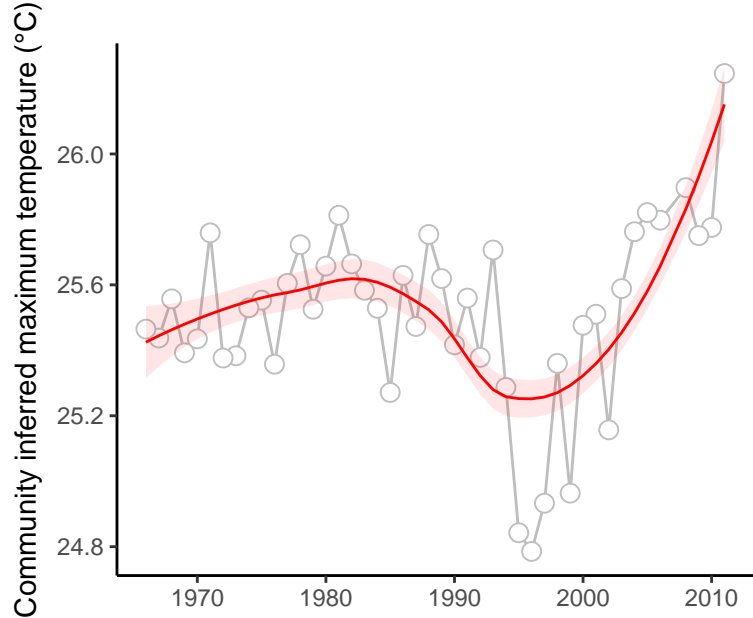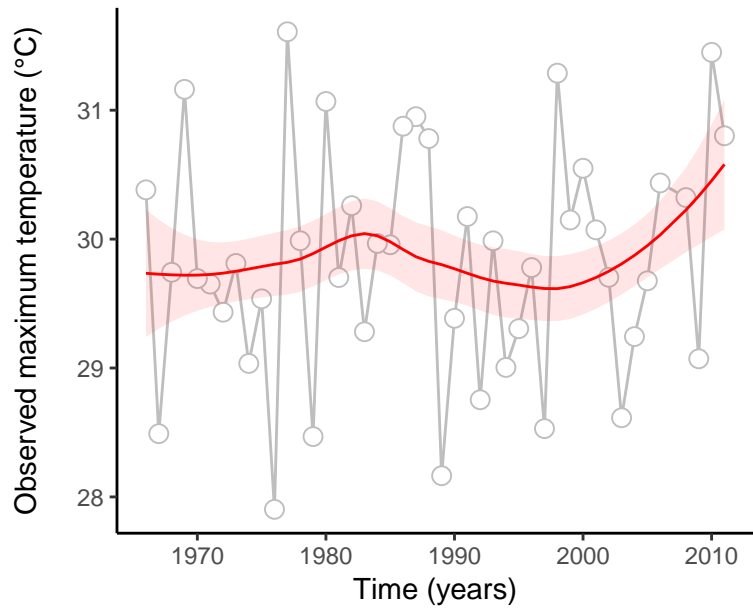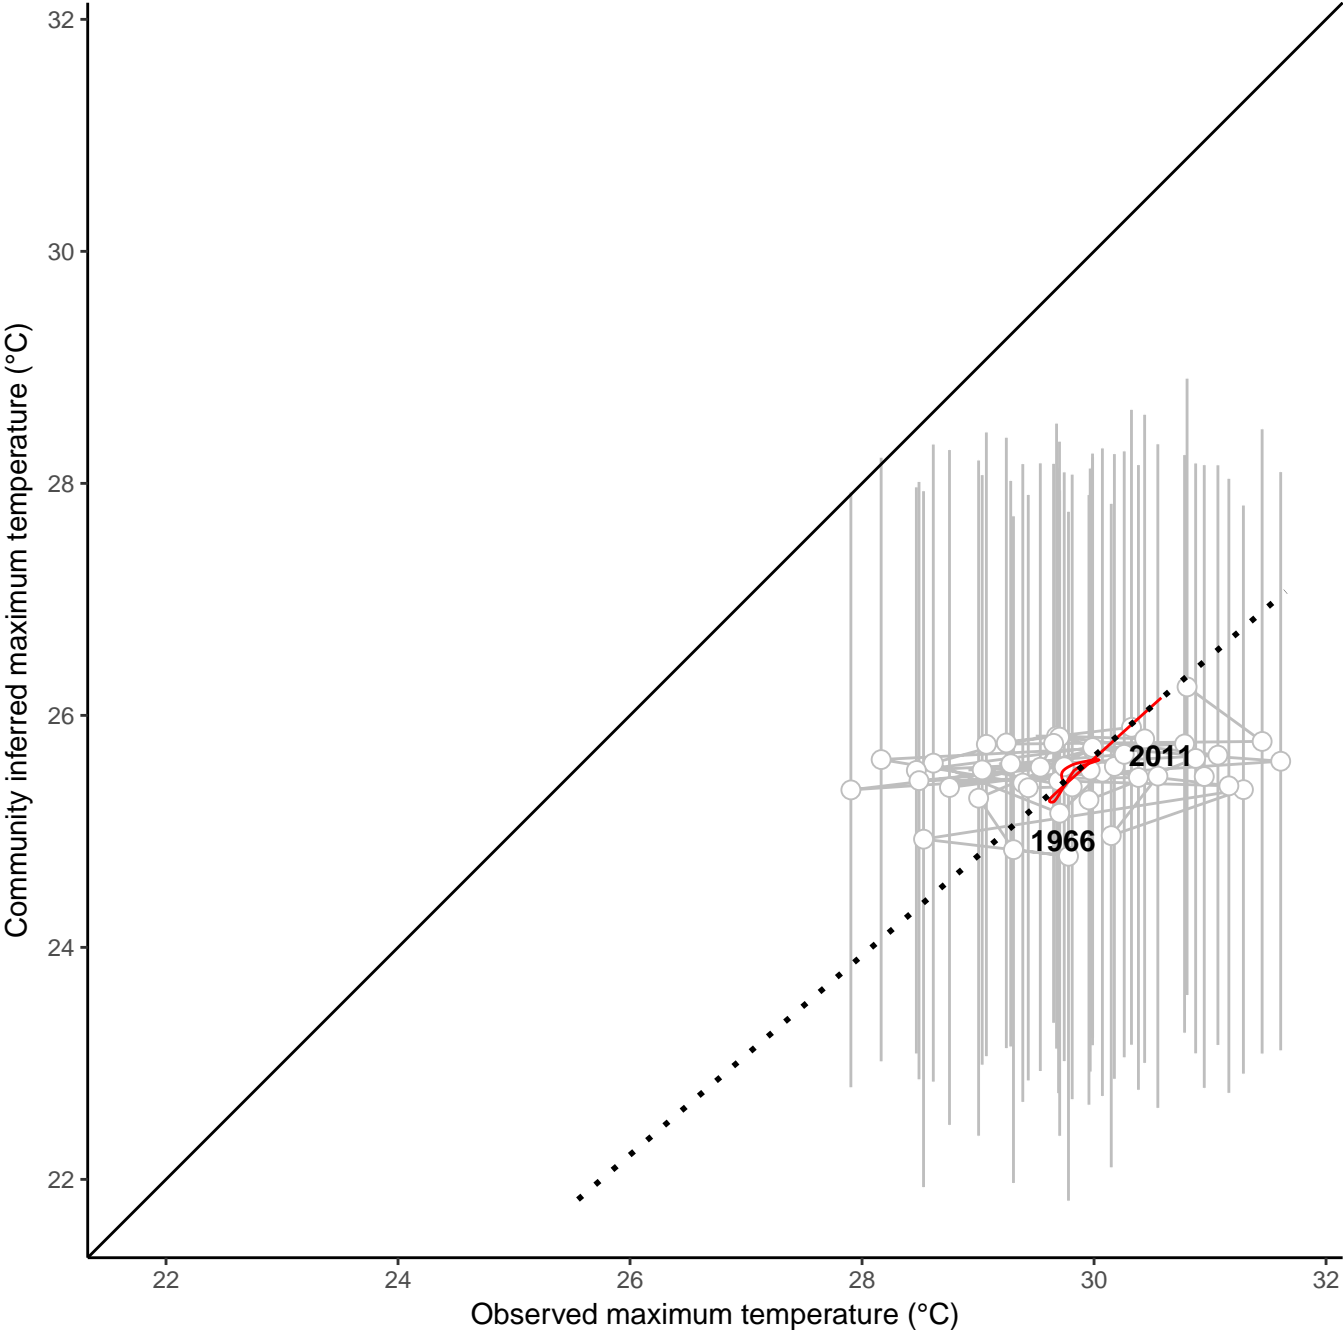



site : 840\_82\_4

absolute deviation = 4.21 | deviation change = 0.79 | maximum state number = 1

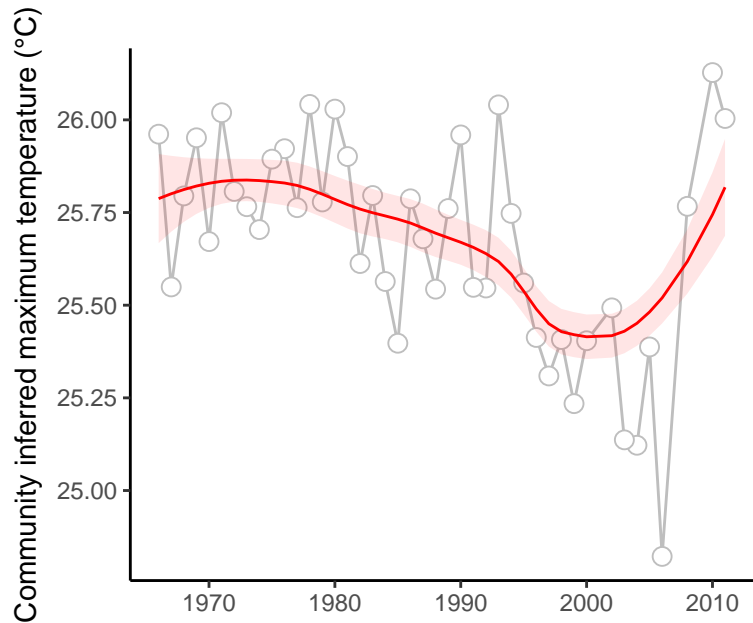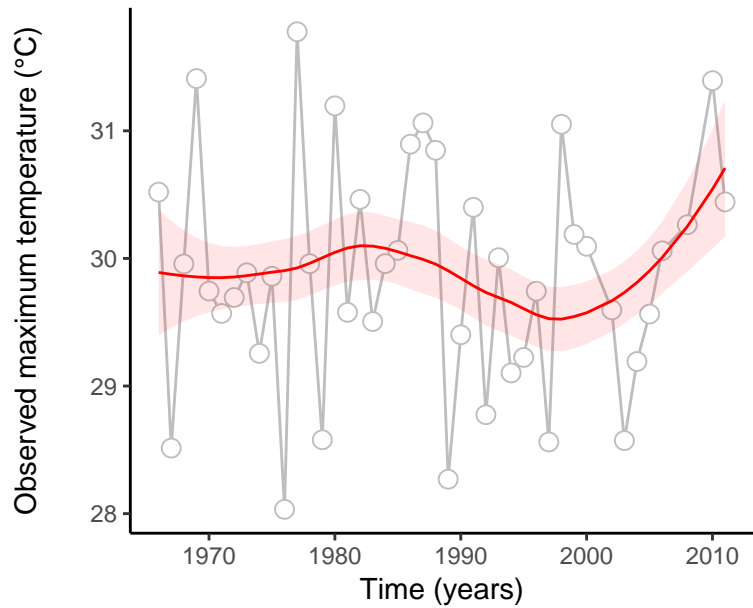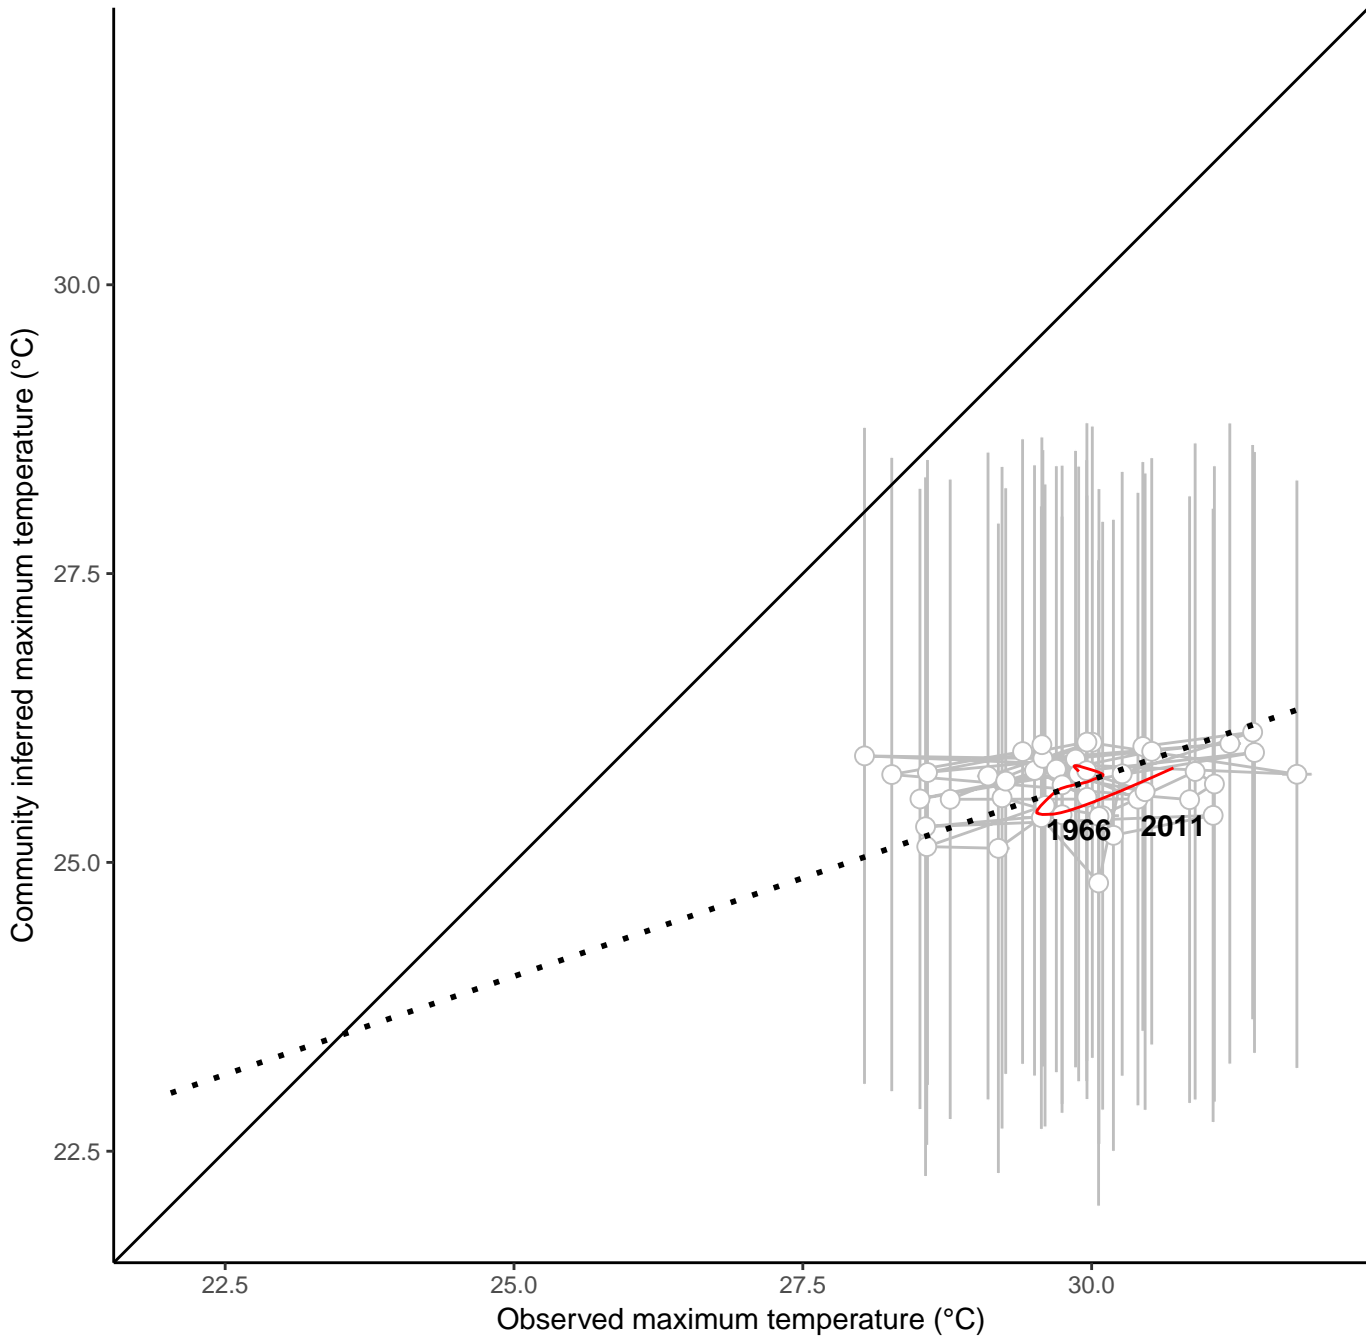

site : 840\_82\_42

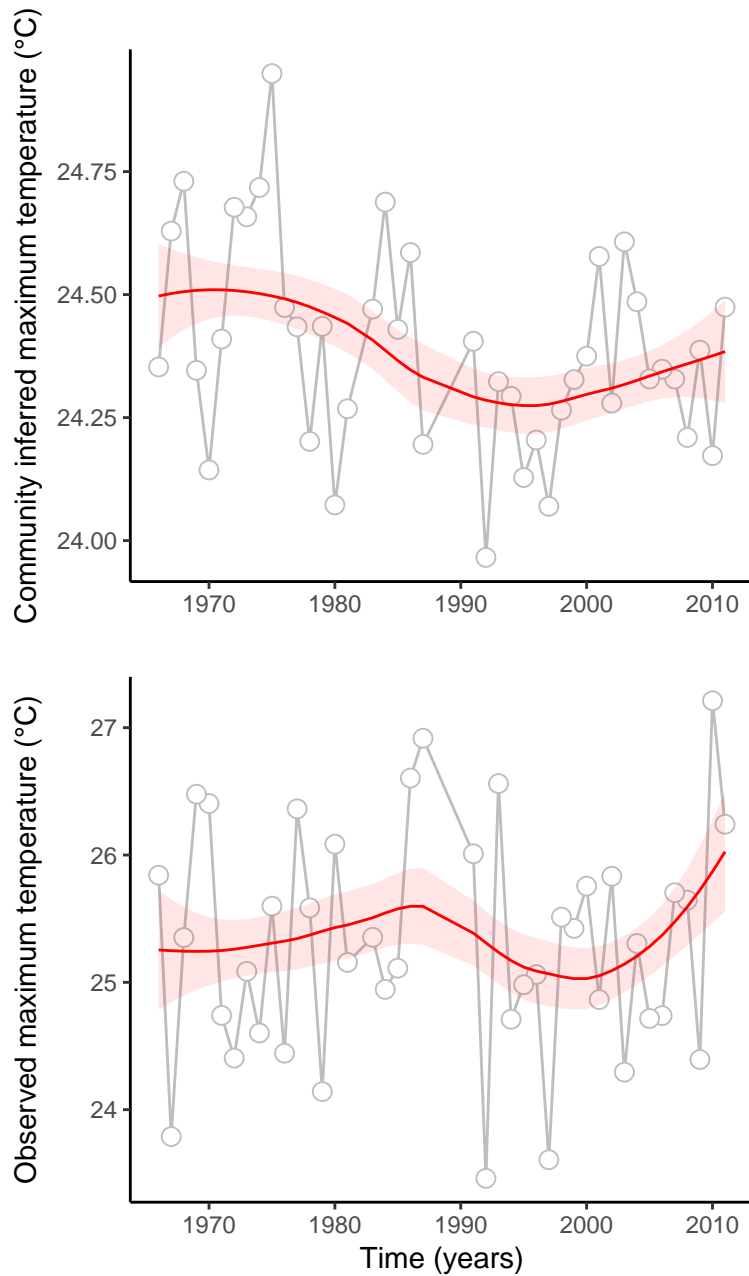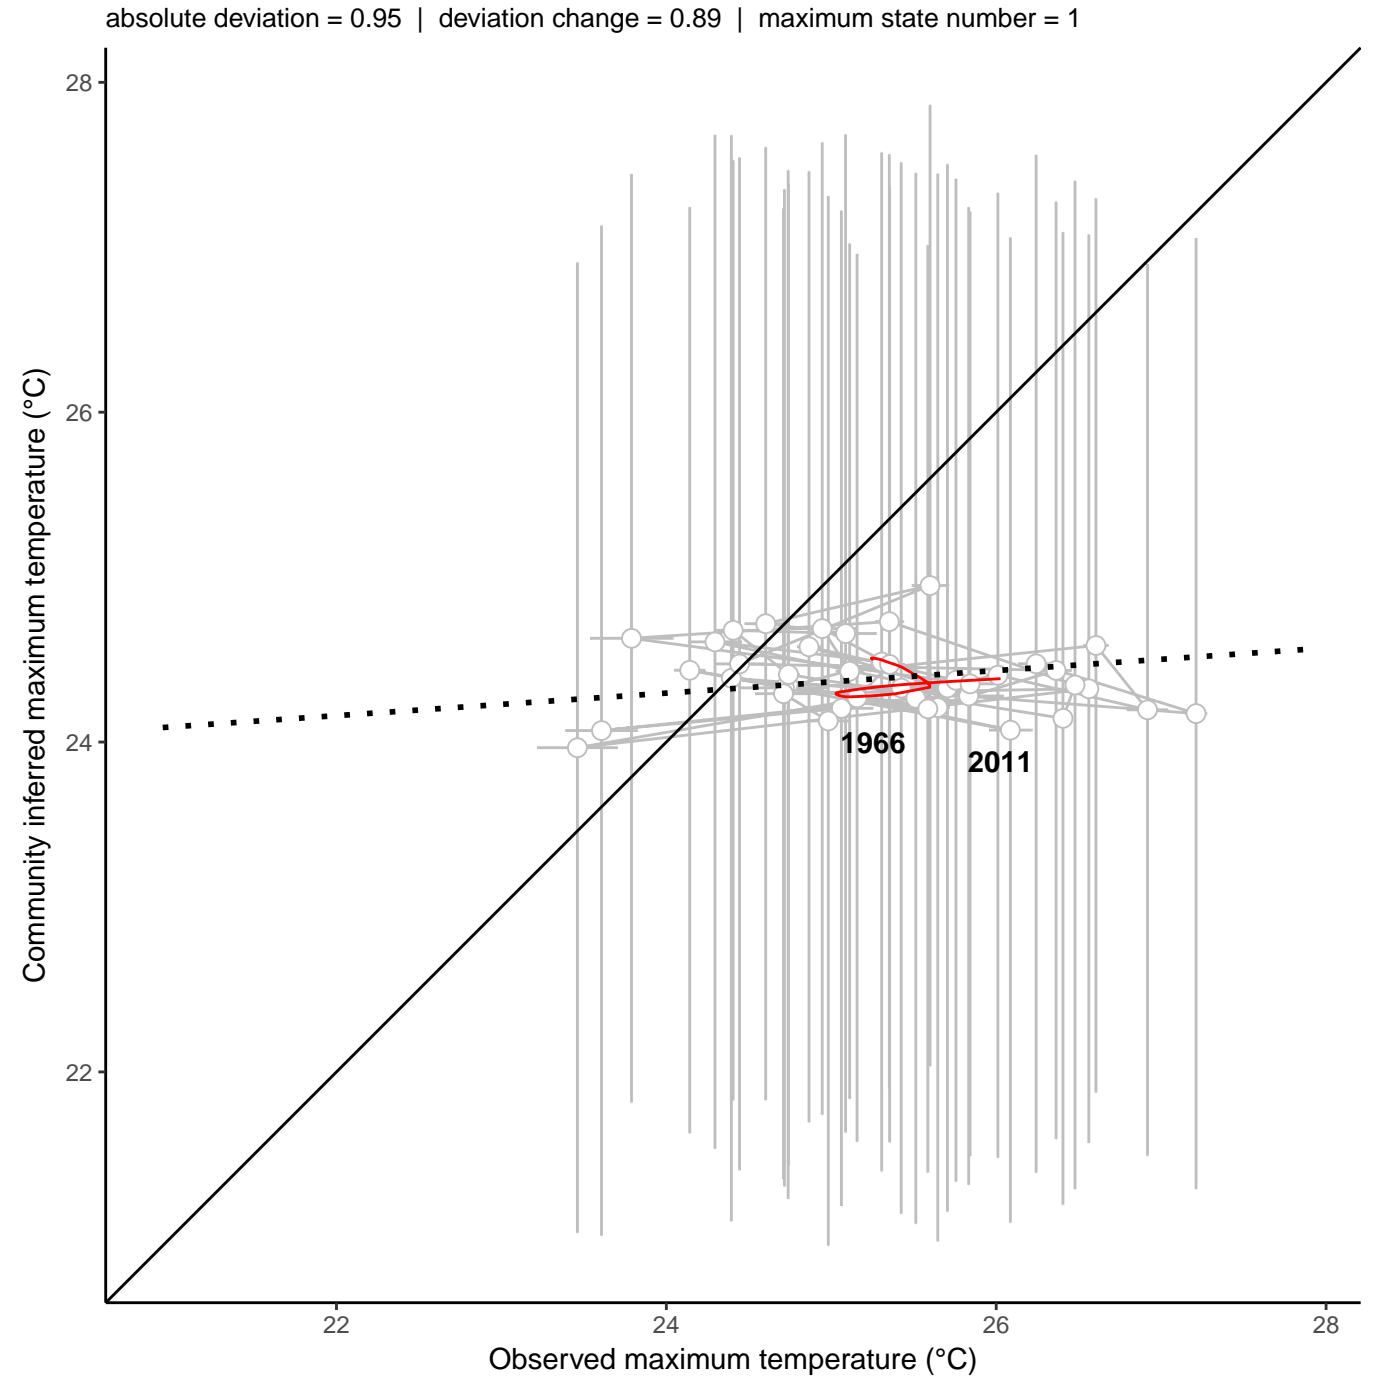

site : 840\_88\_29

absolute deviation = 2.44 | deviation change = 1.67 | maximum state number = 1

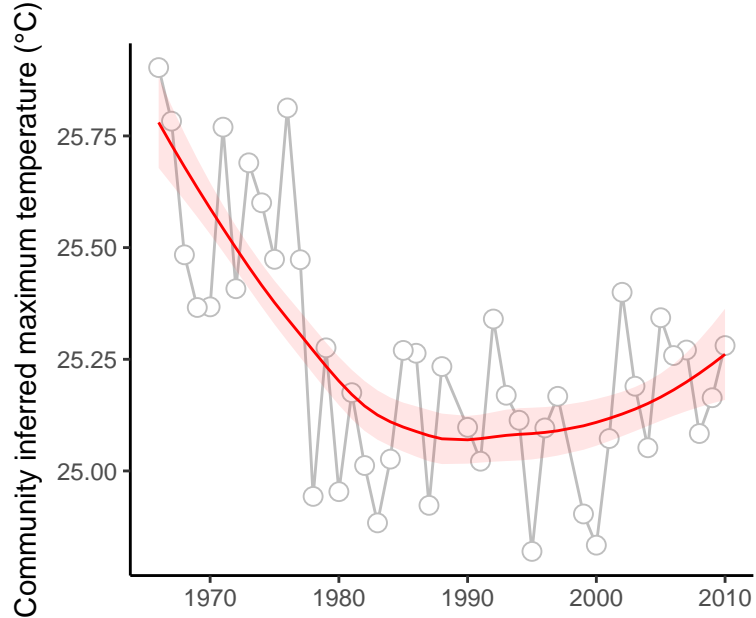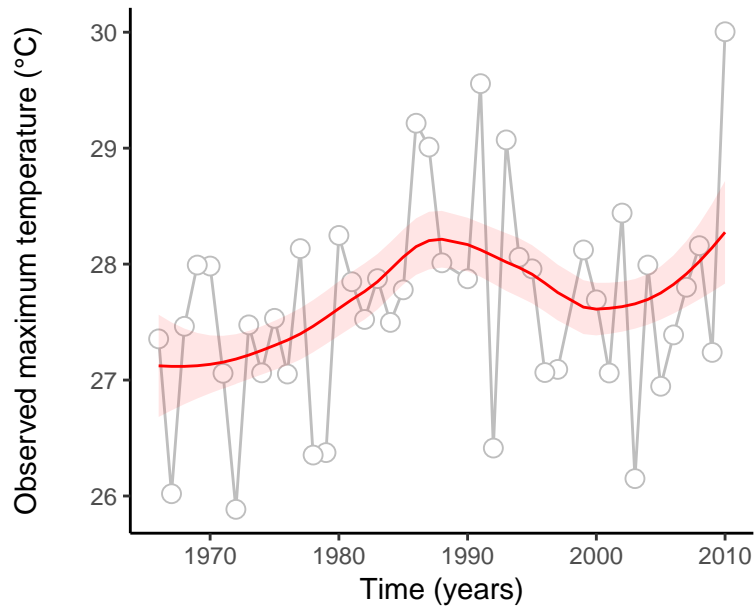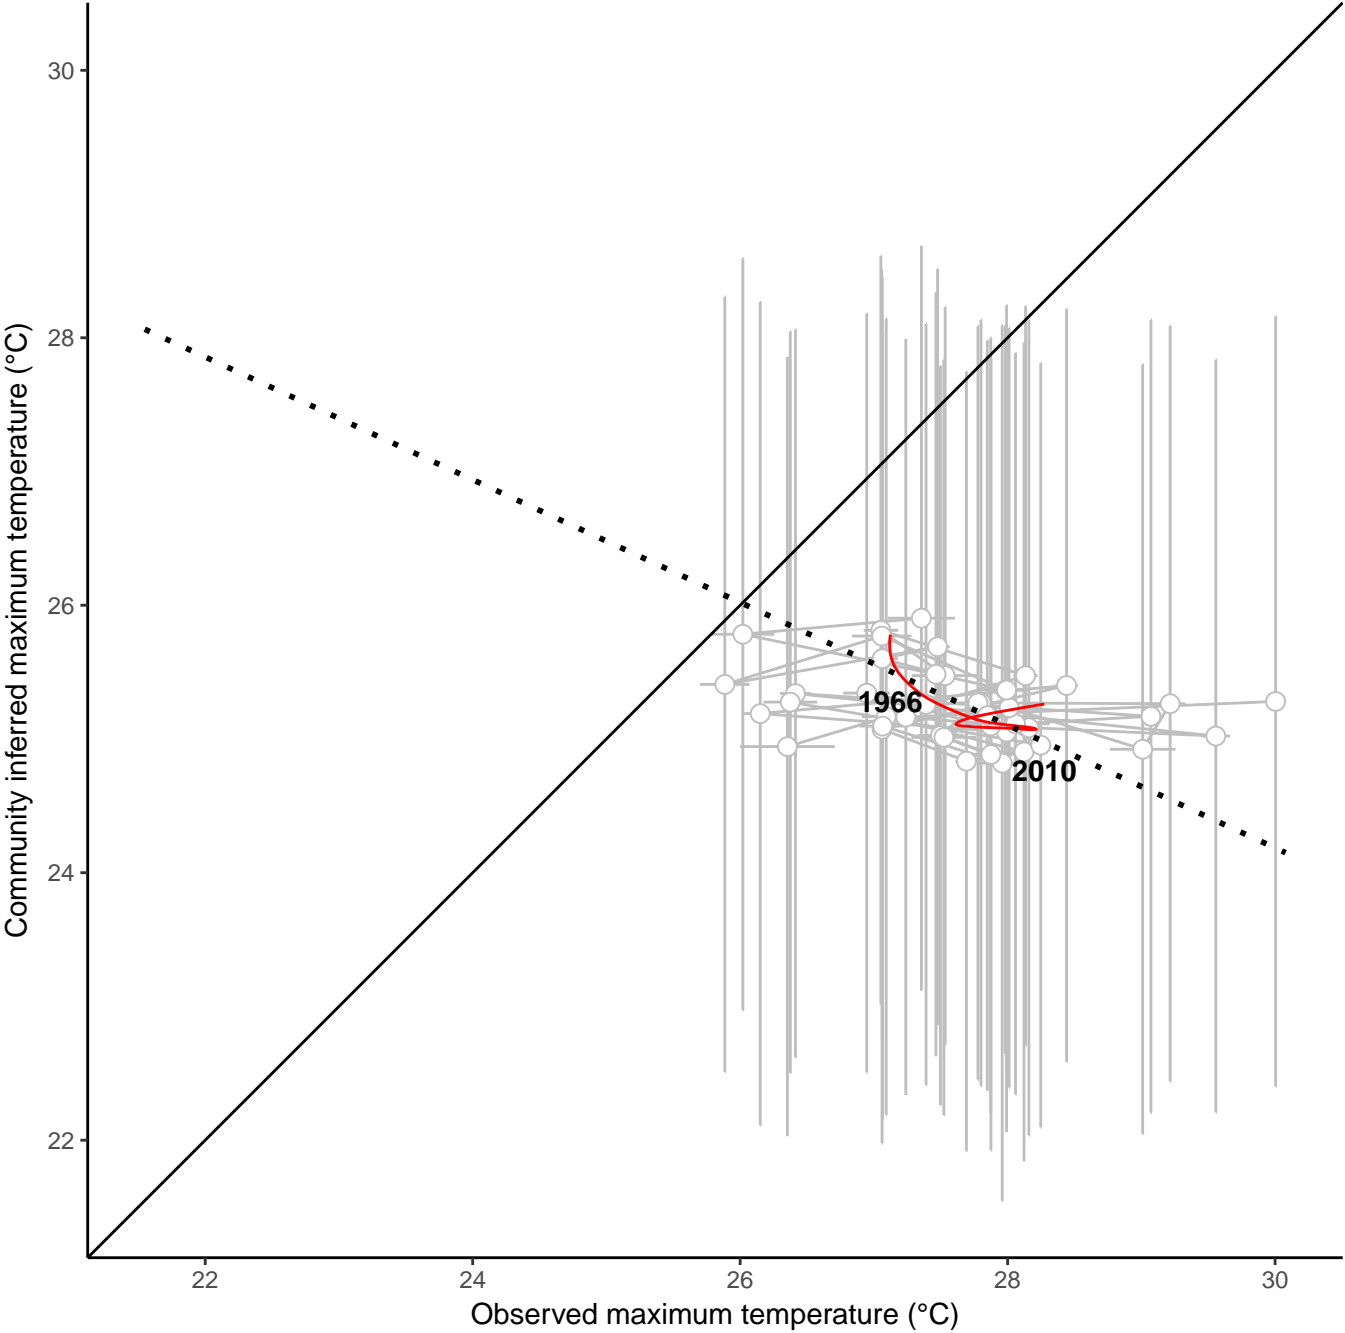

site : 840\_91\_1

absolute deviation = 1 | deviation change = 0.49 | maximum state number = 1

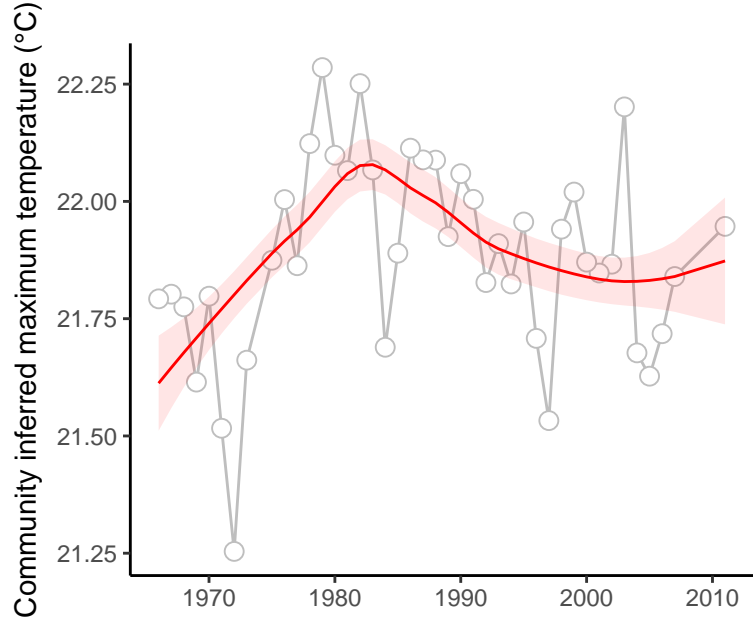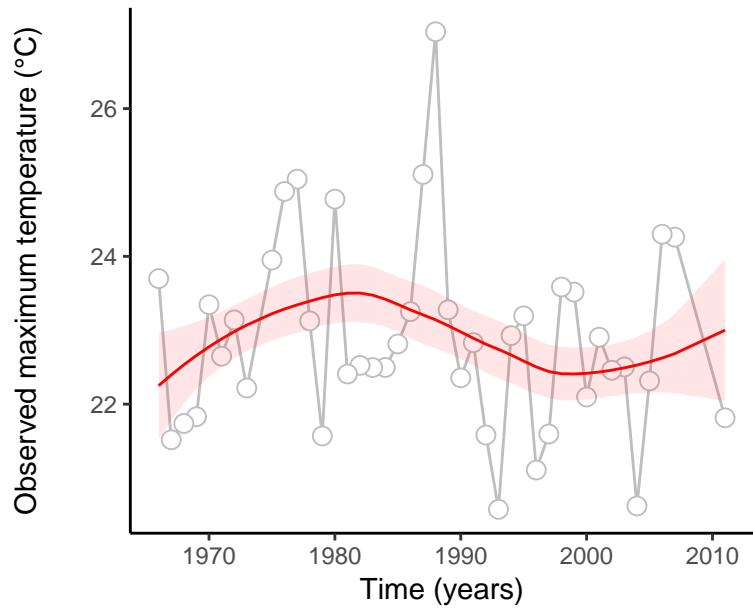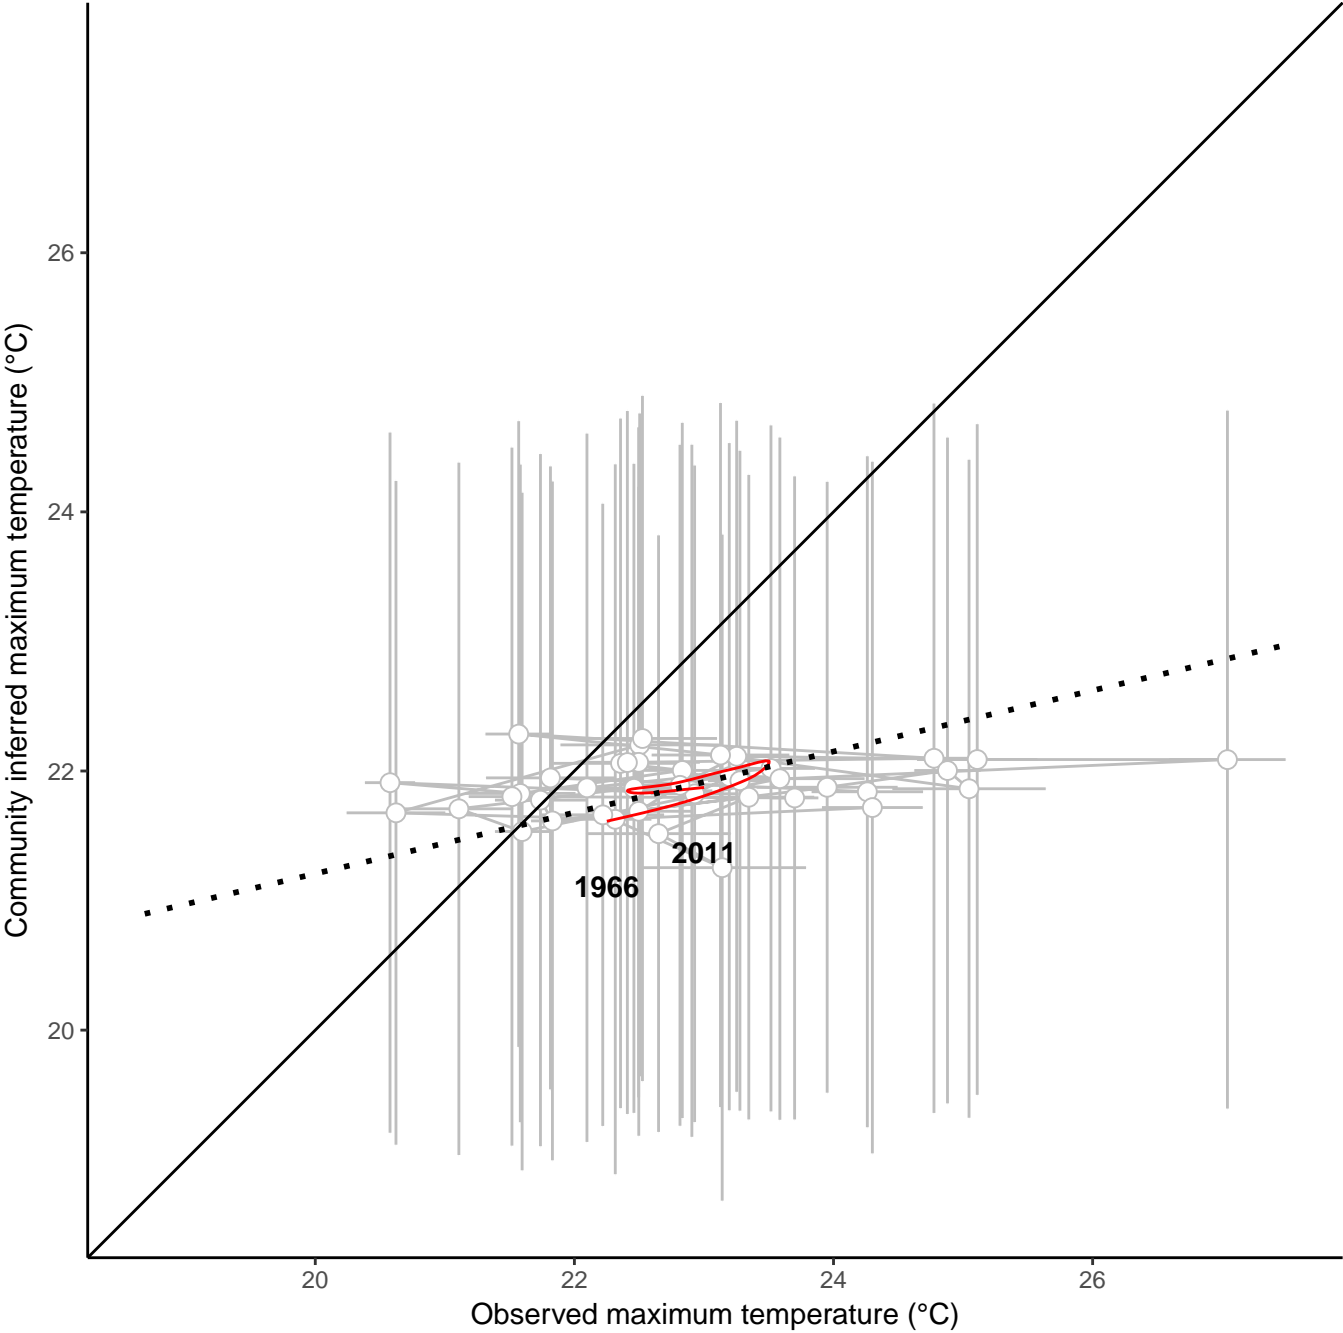

site : 840\_91\_66

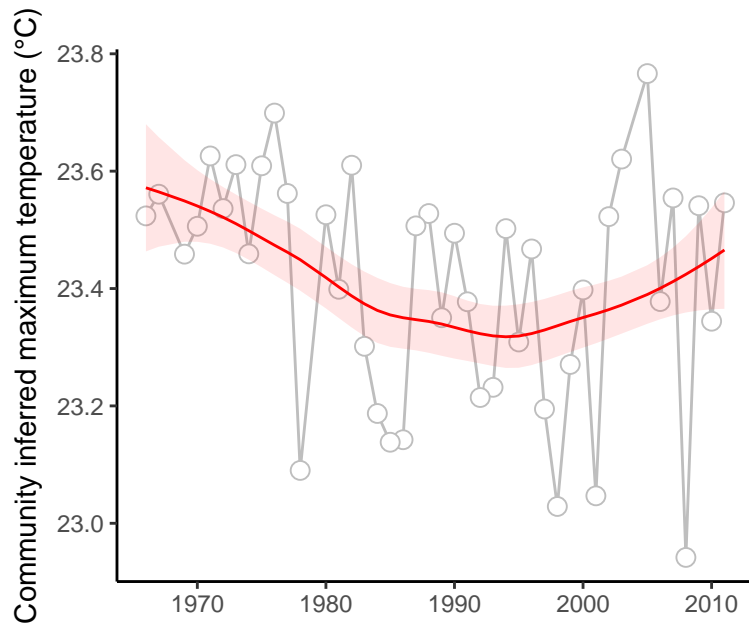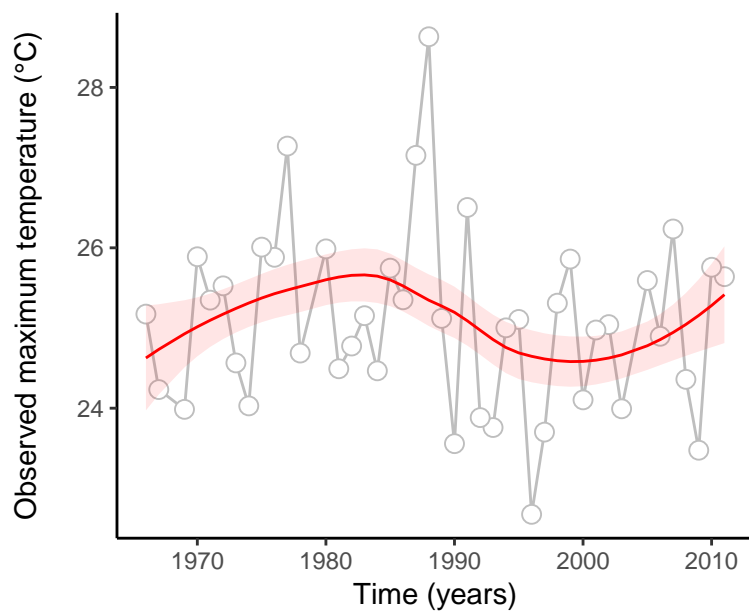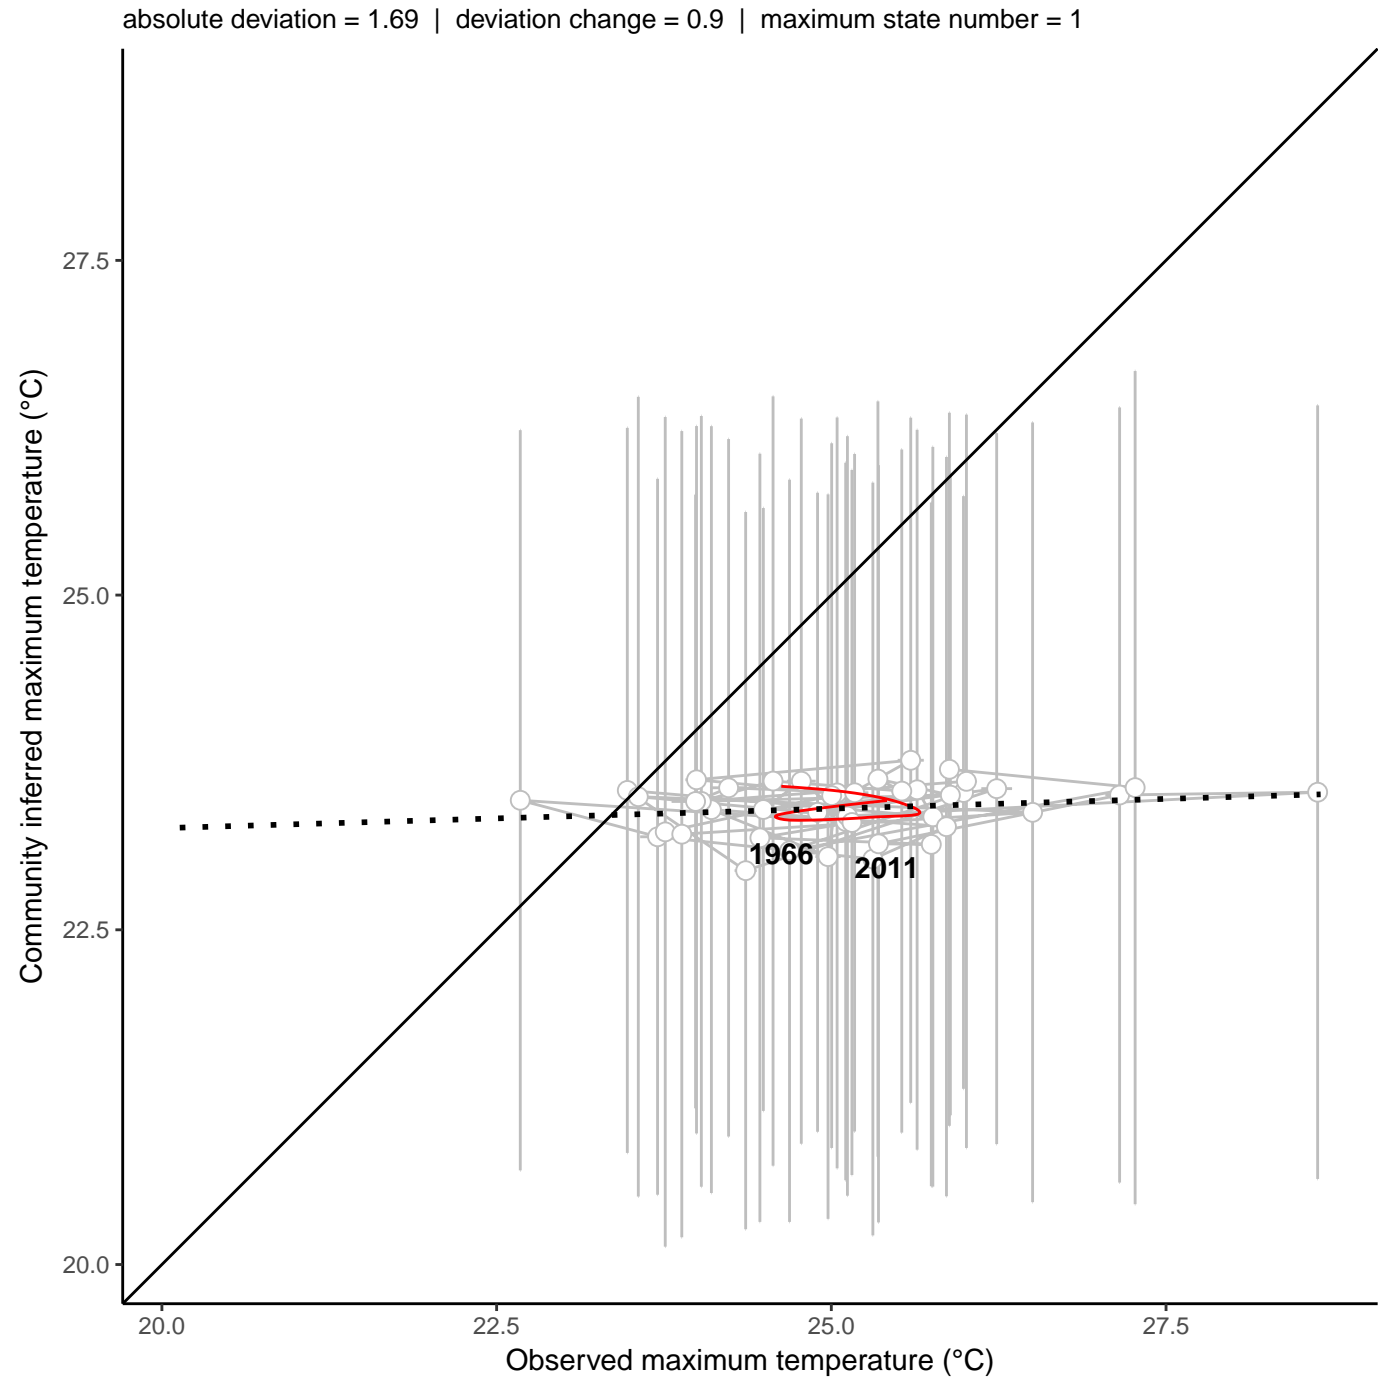

site : 840\_25\_12

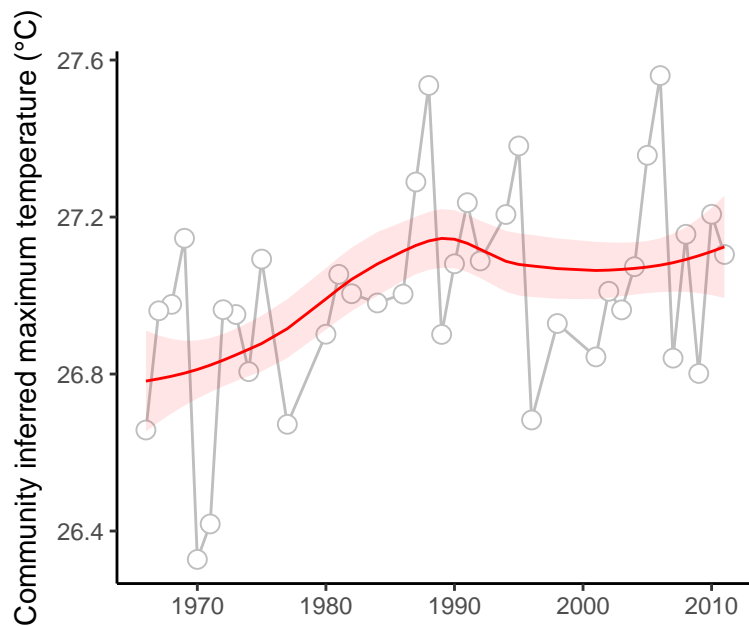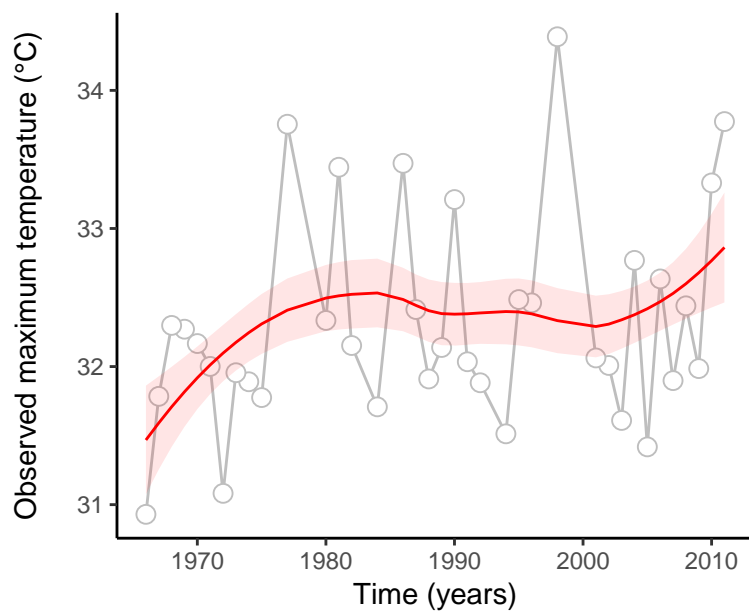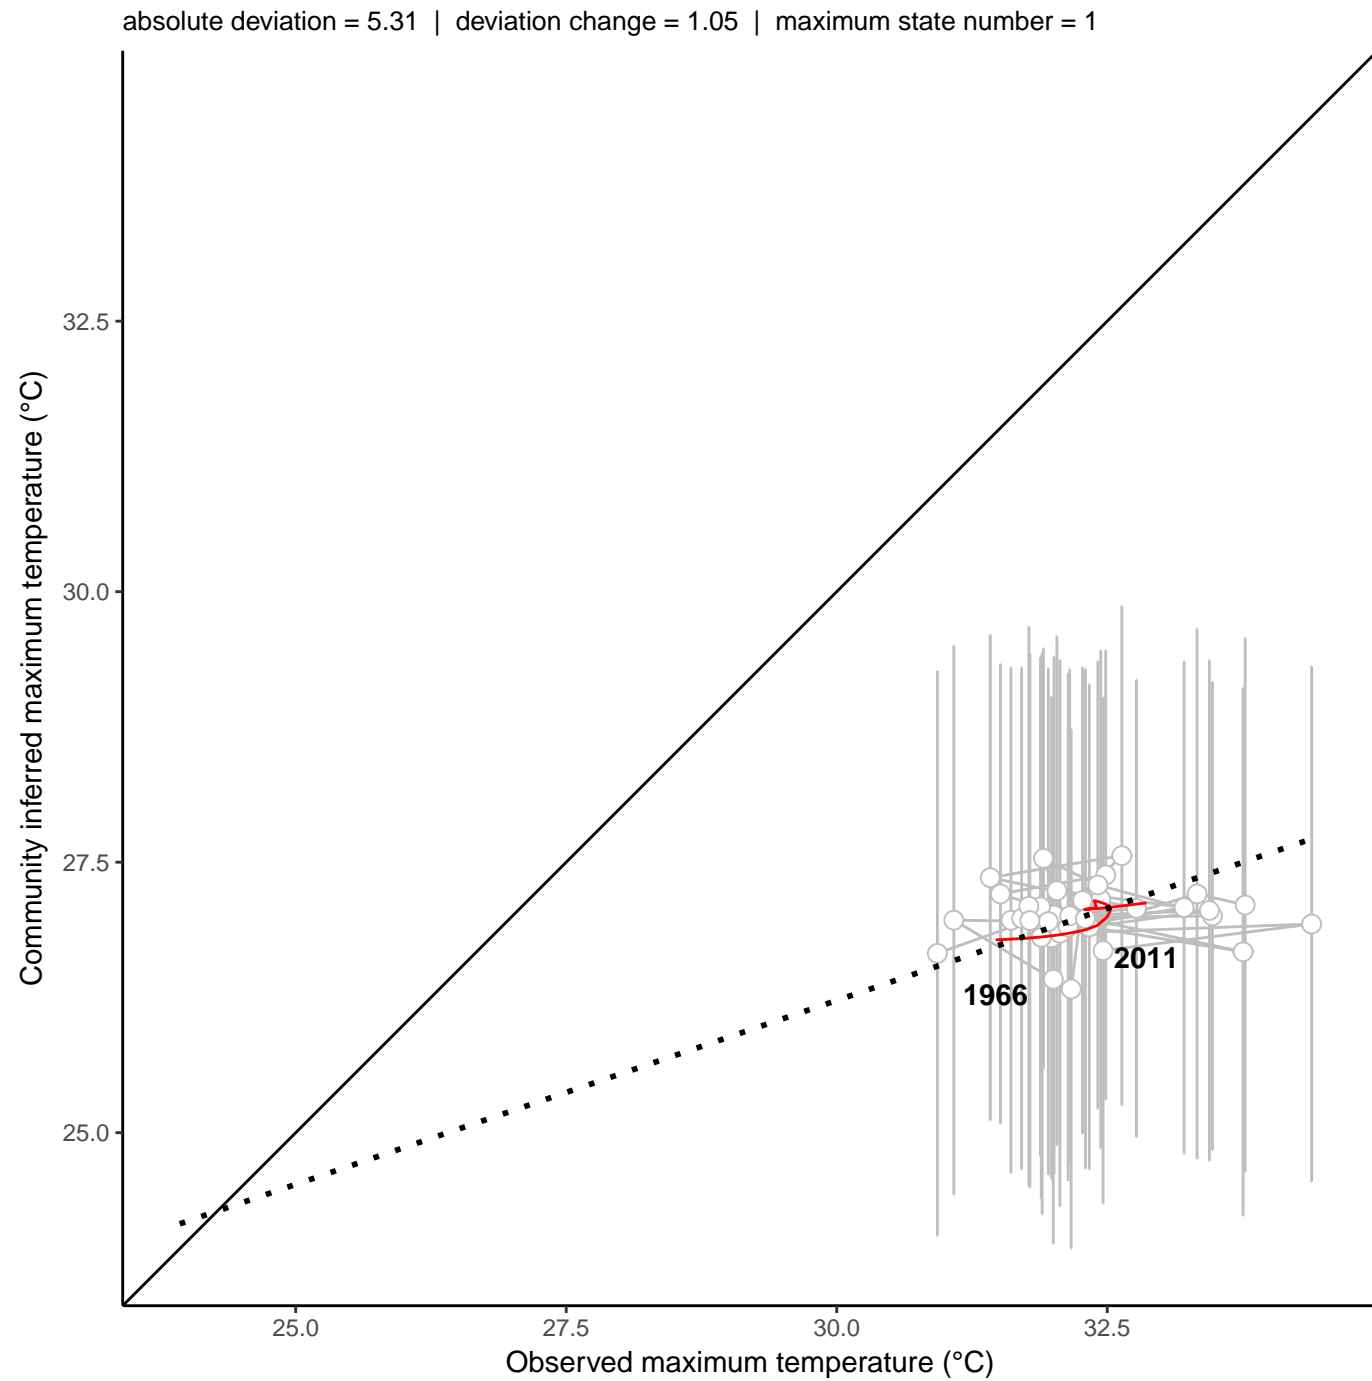

site : 840\_25\_30

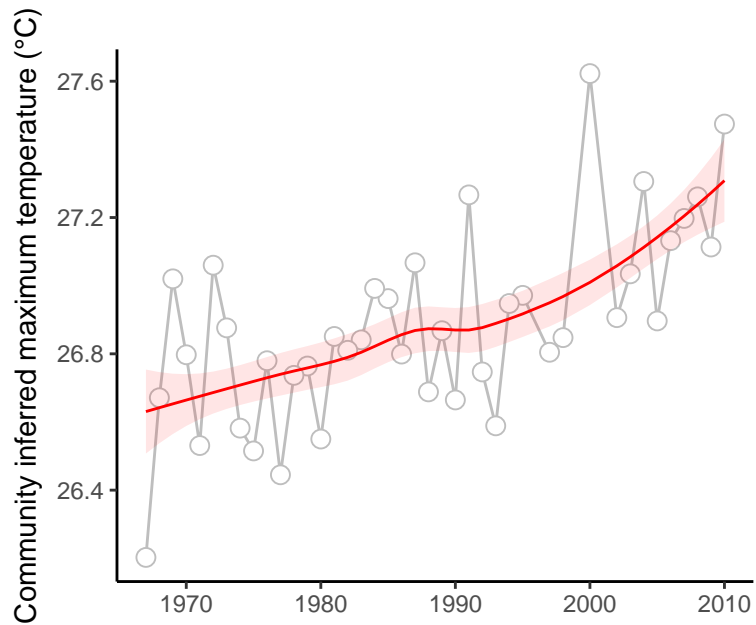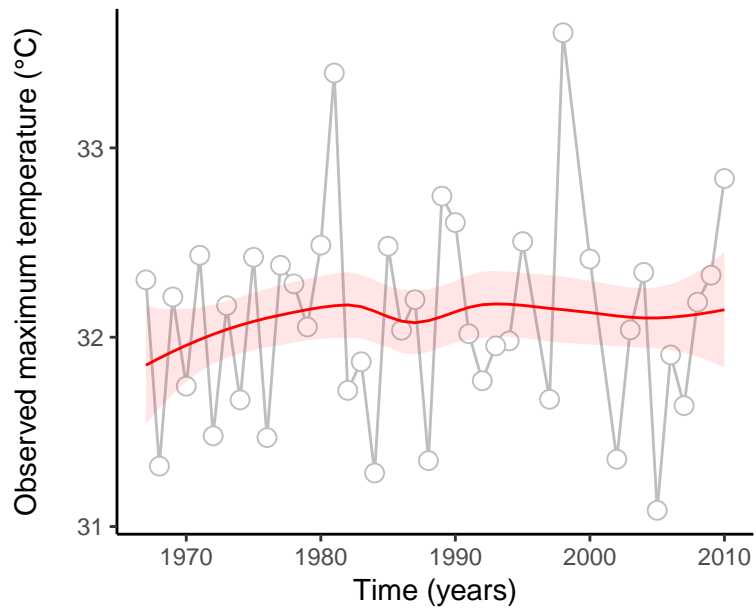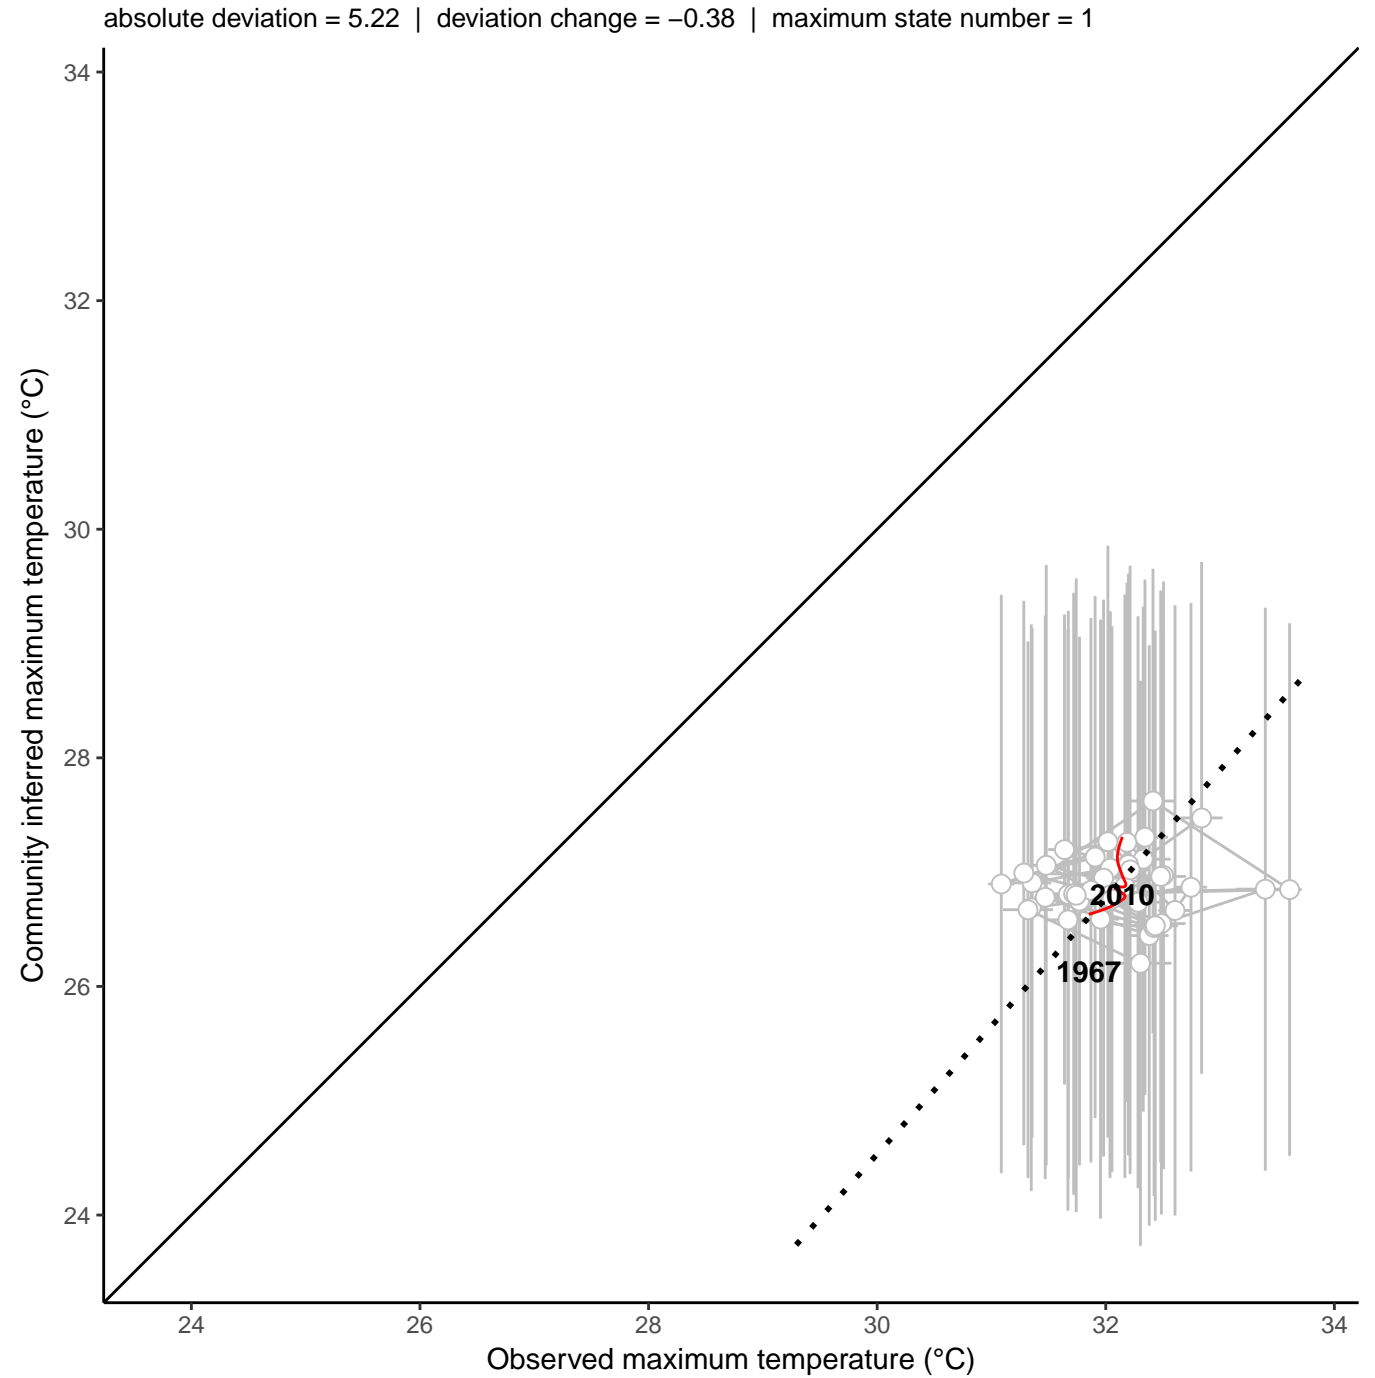

site : 840\_34\_36

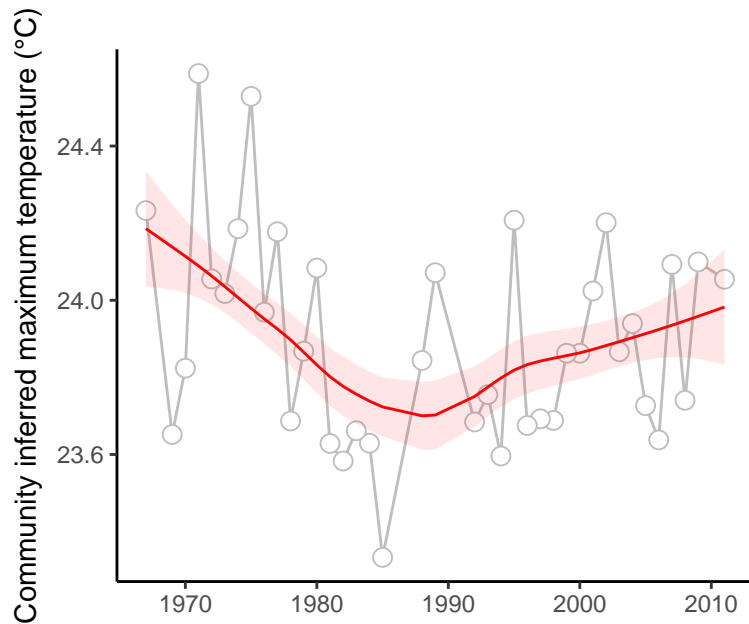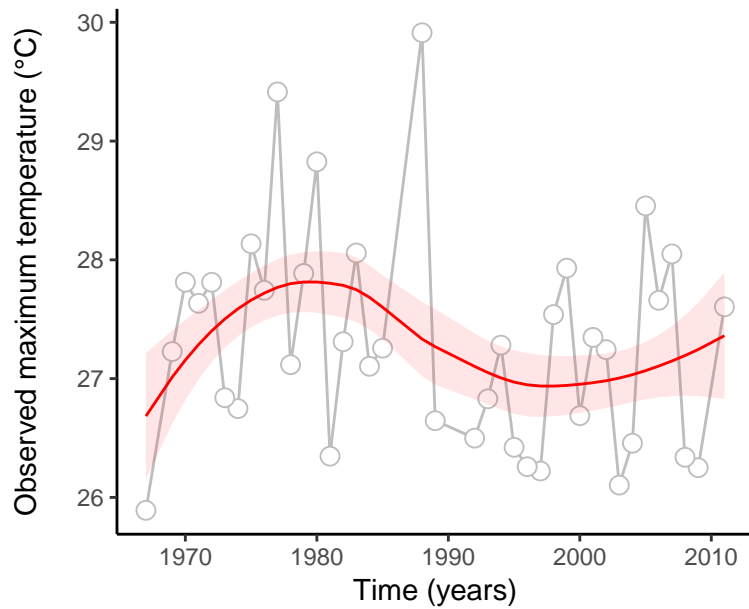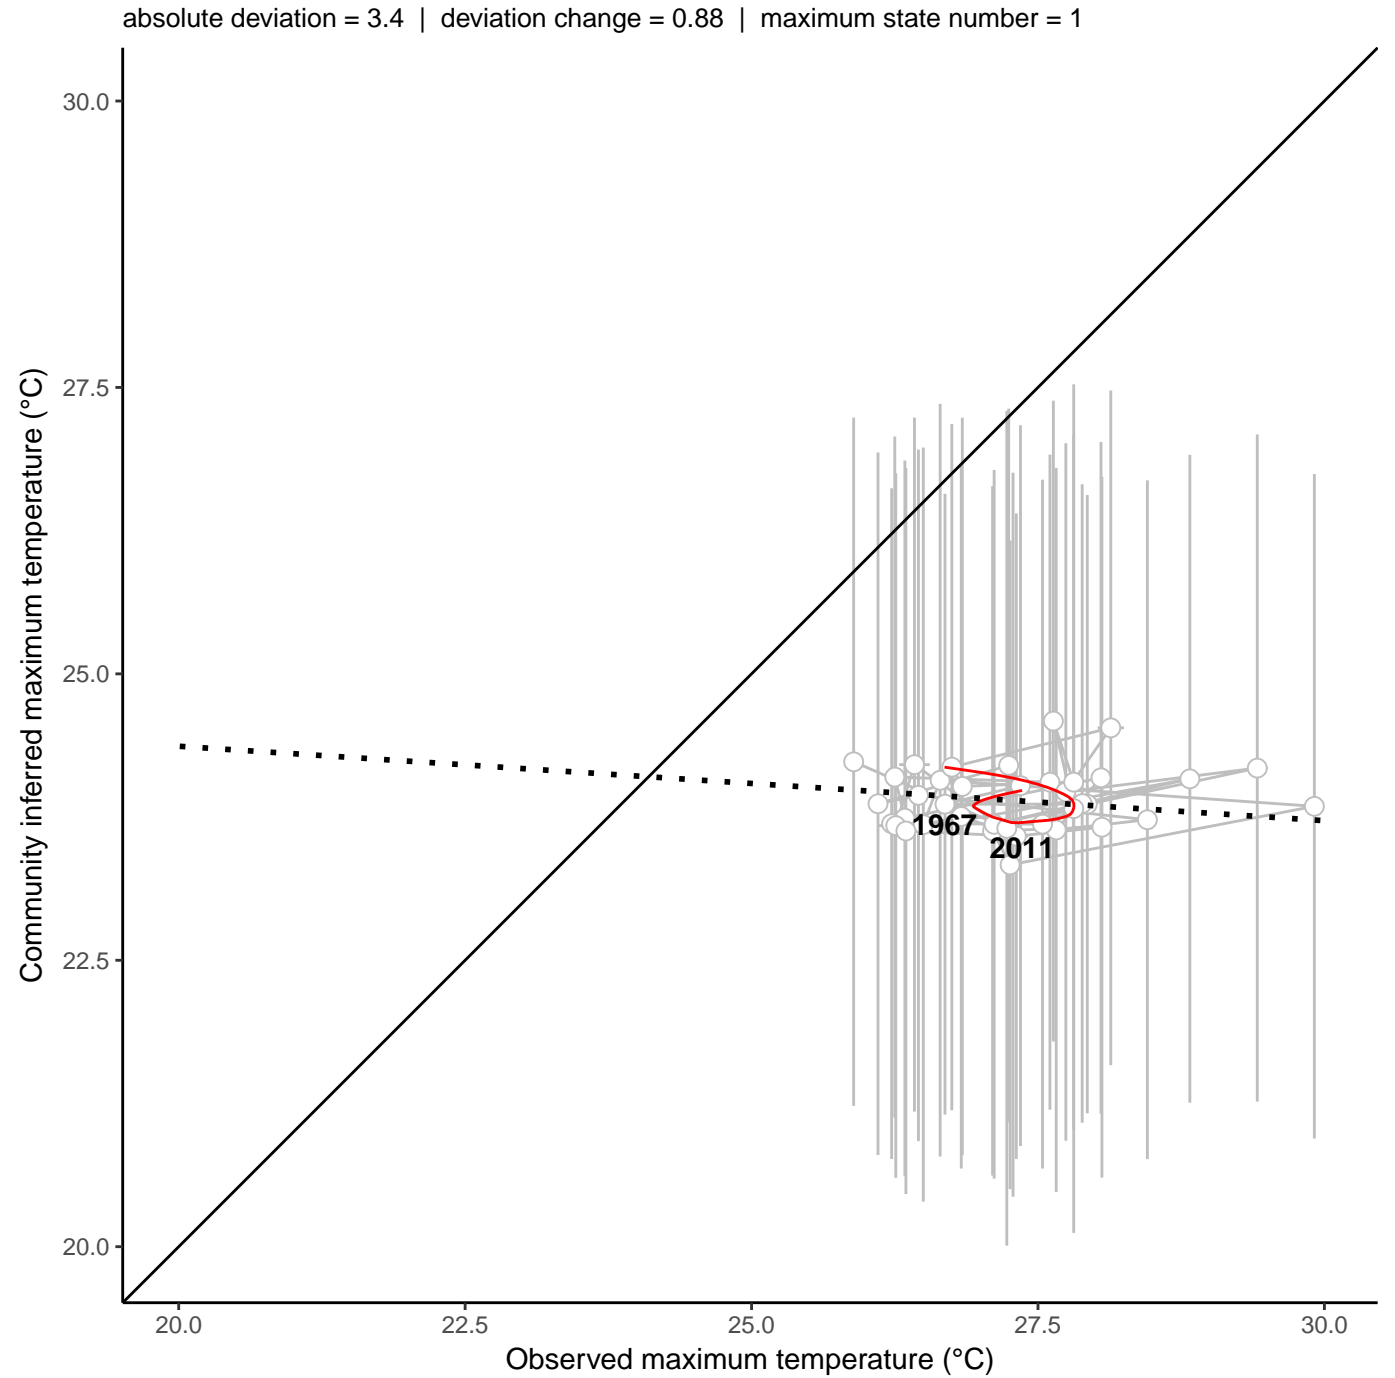



site : 840\_36\_10

absolute deviation = 2.64 | deviation change = 1 | maximum state number = 1

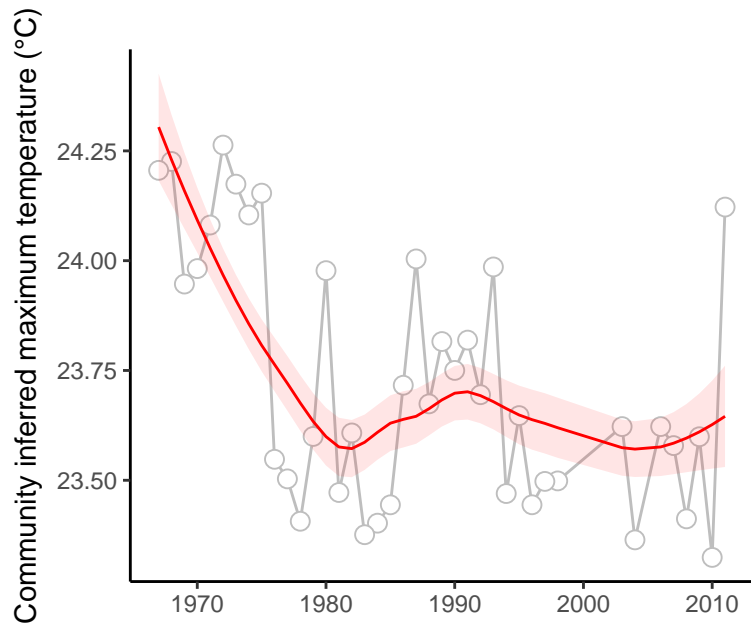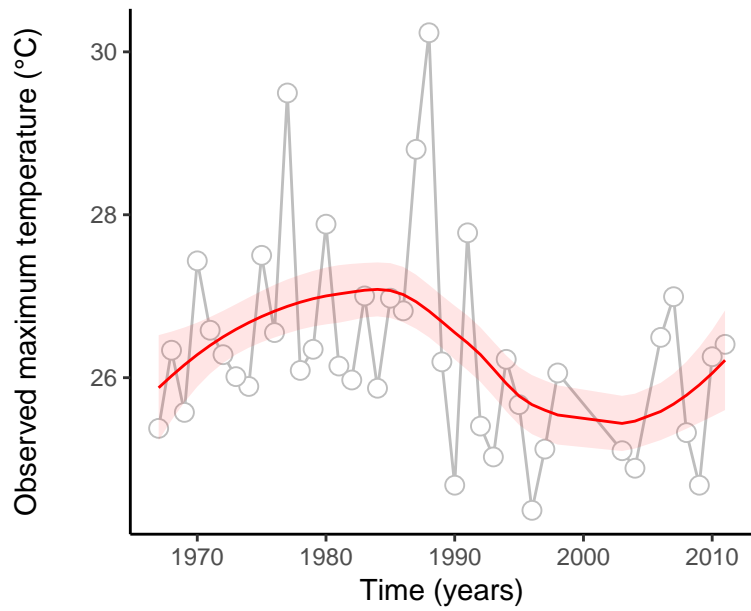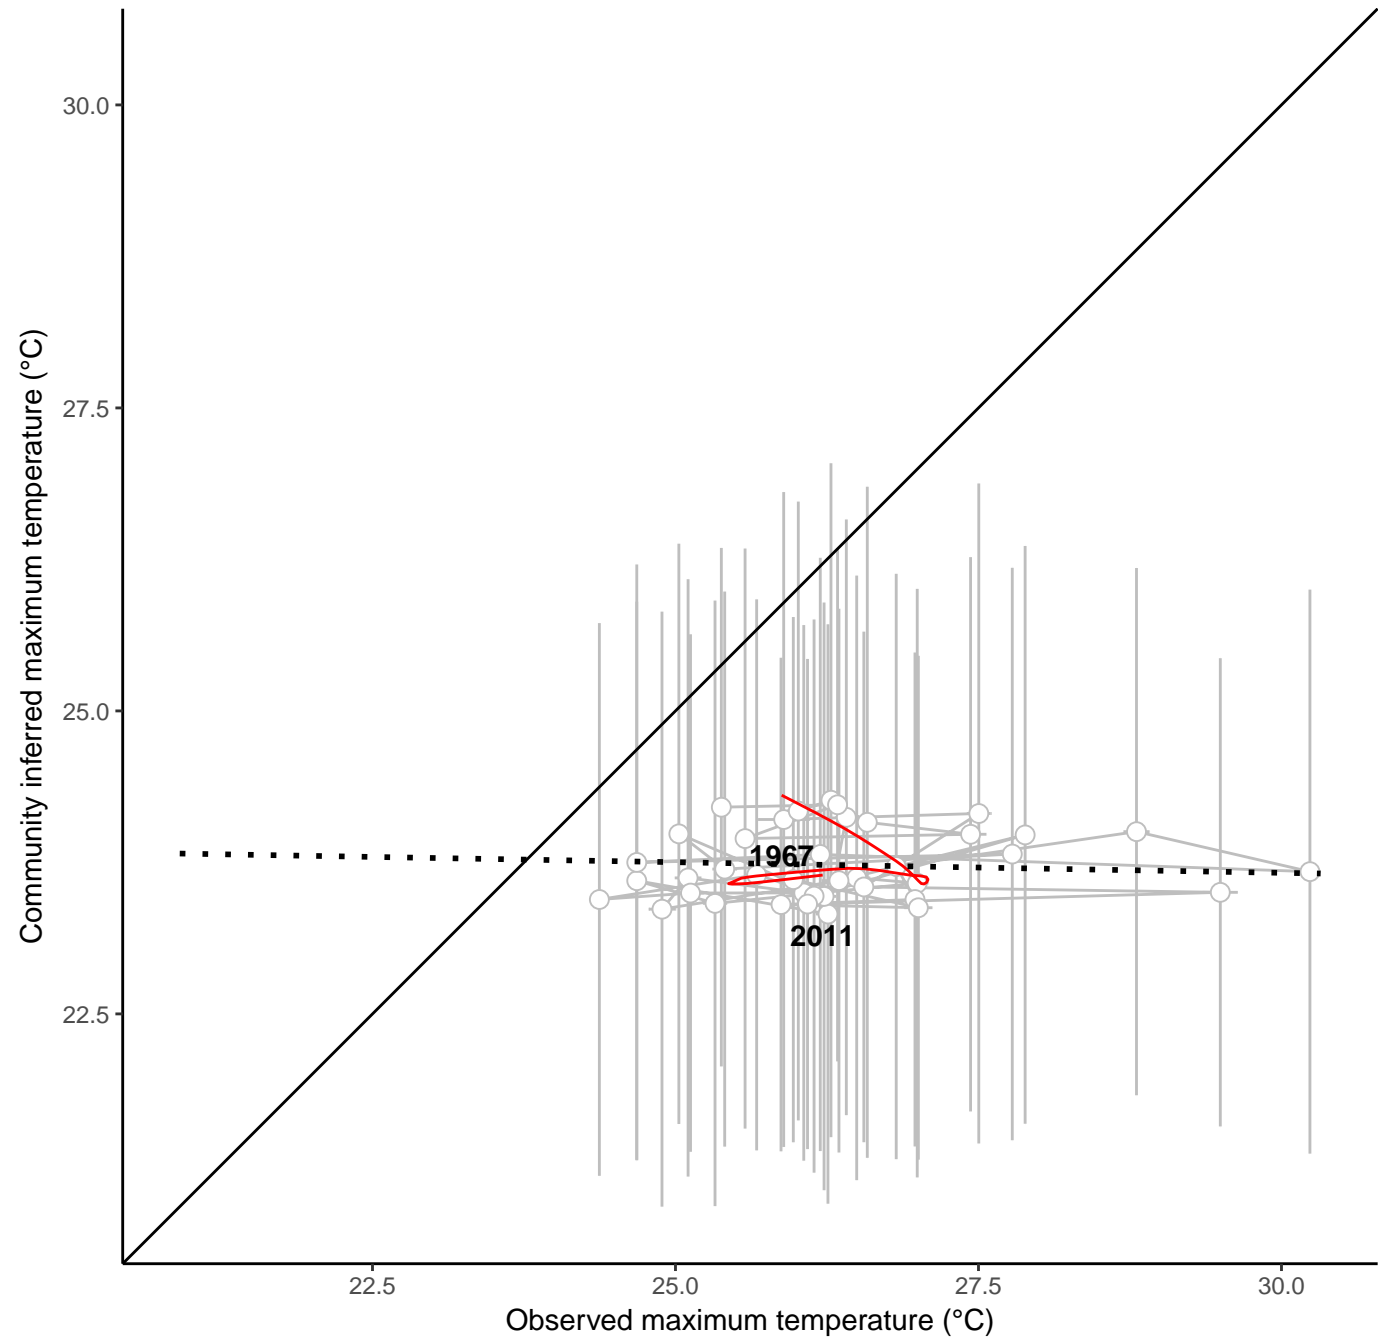

site : 840\_36\_13

absolute deviation = 3.1 | deviation change = 1.12 | maximum state number = 1

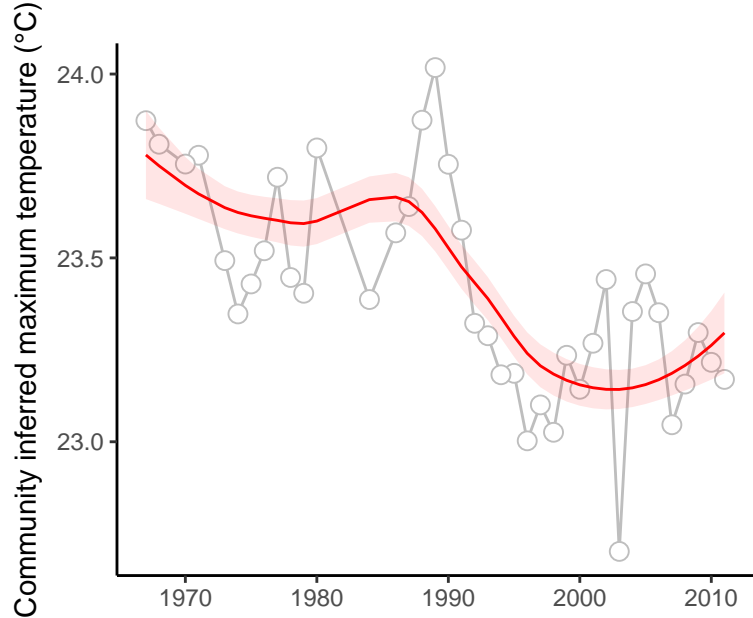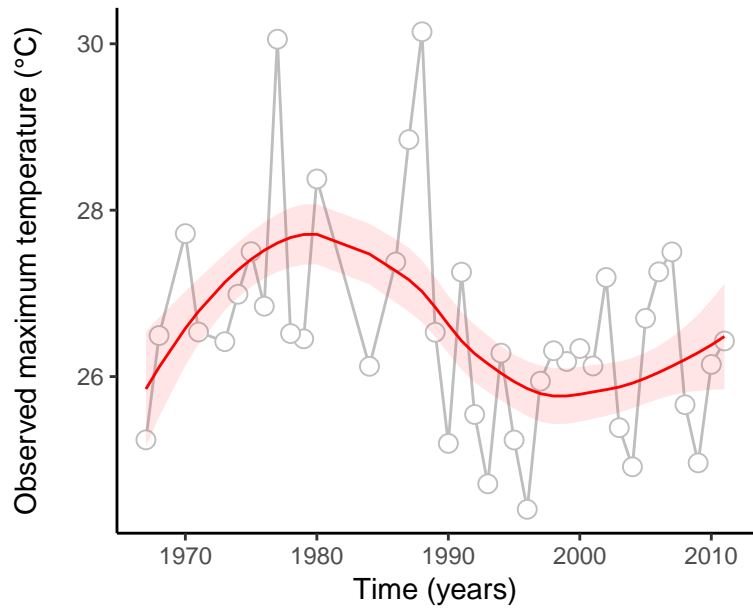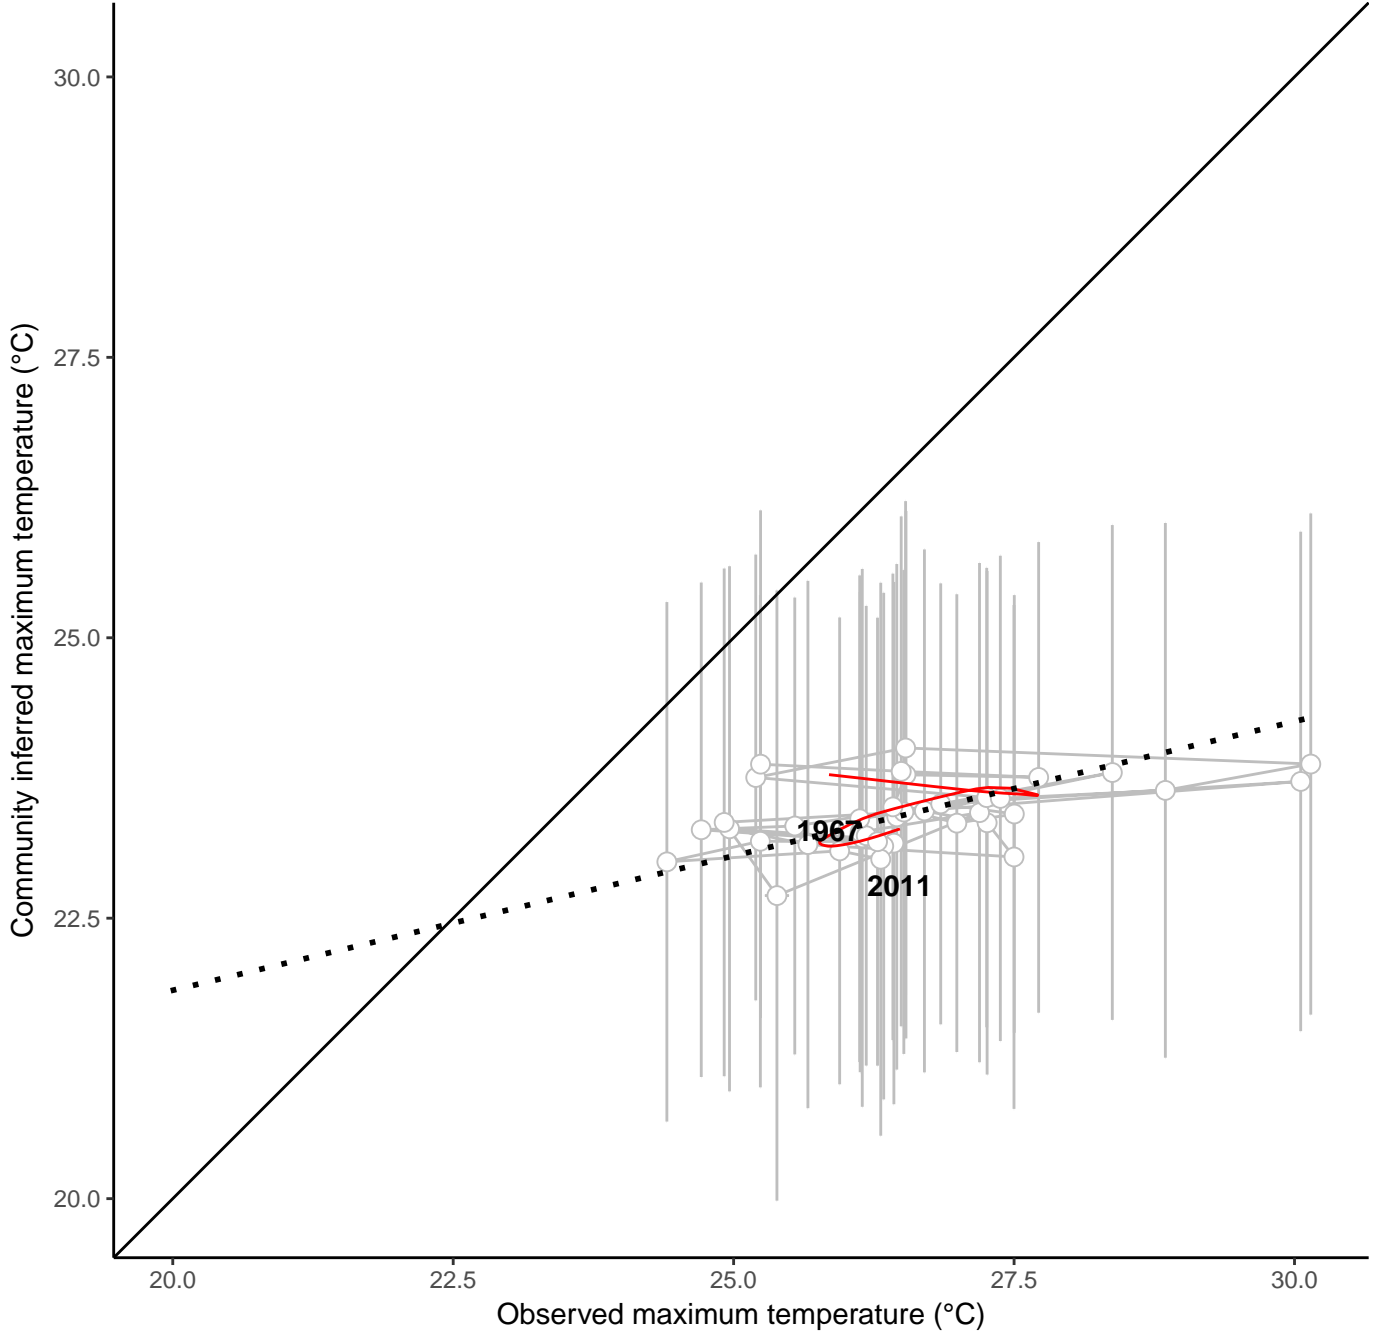

site : 840\_36\_14

absolute deviation = 3.07 | deviation change = 1.44 | maximum state number = 1

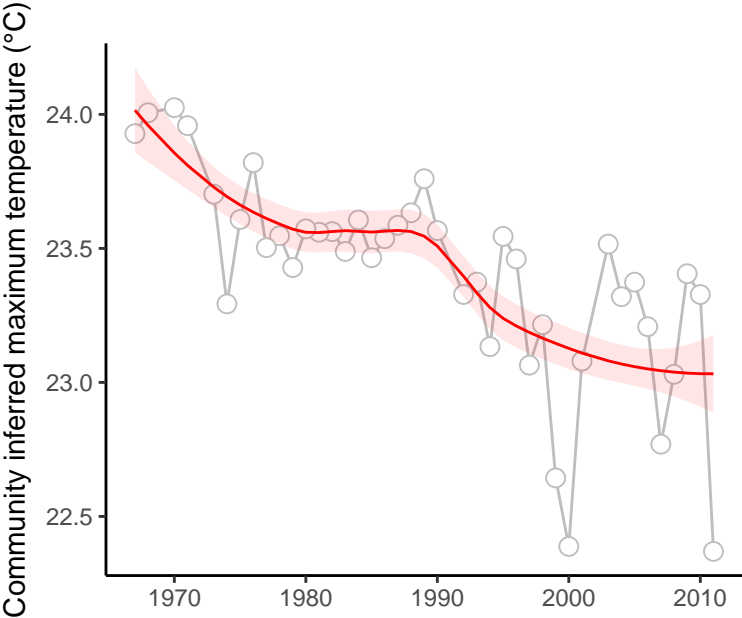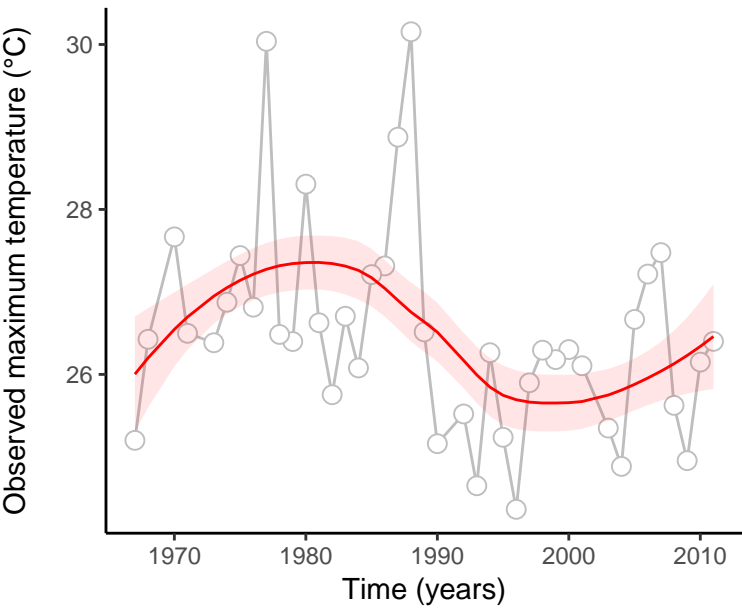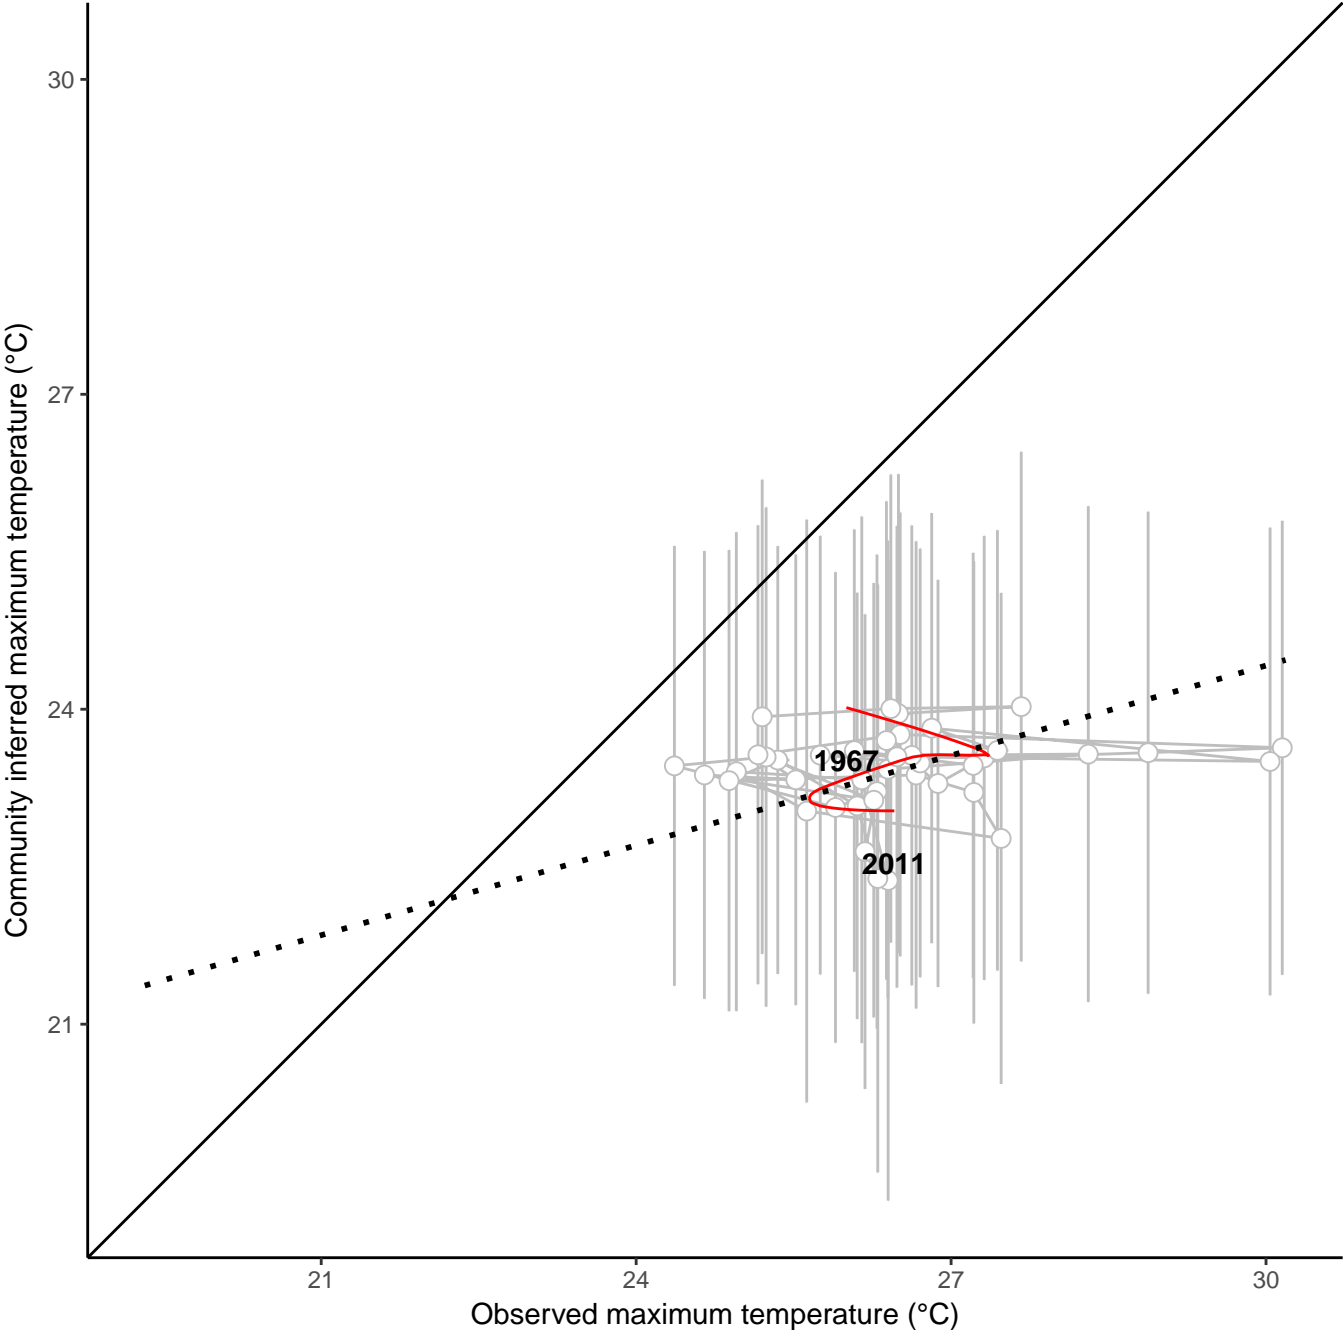

site : 840\_36\_22

absolute deviation = 2.77 | deviation change = 1.34 | maximum state number = 1

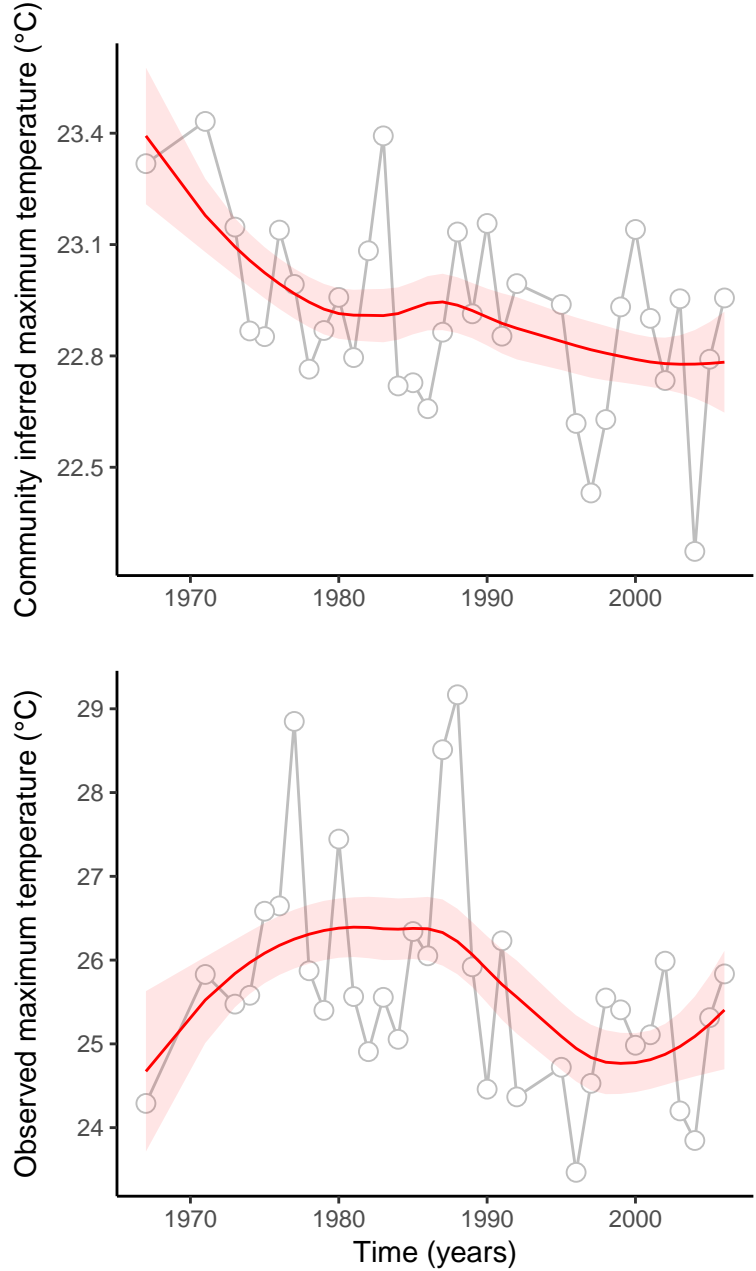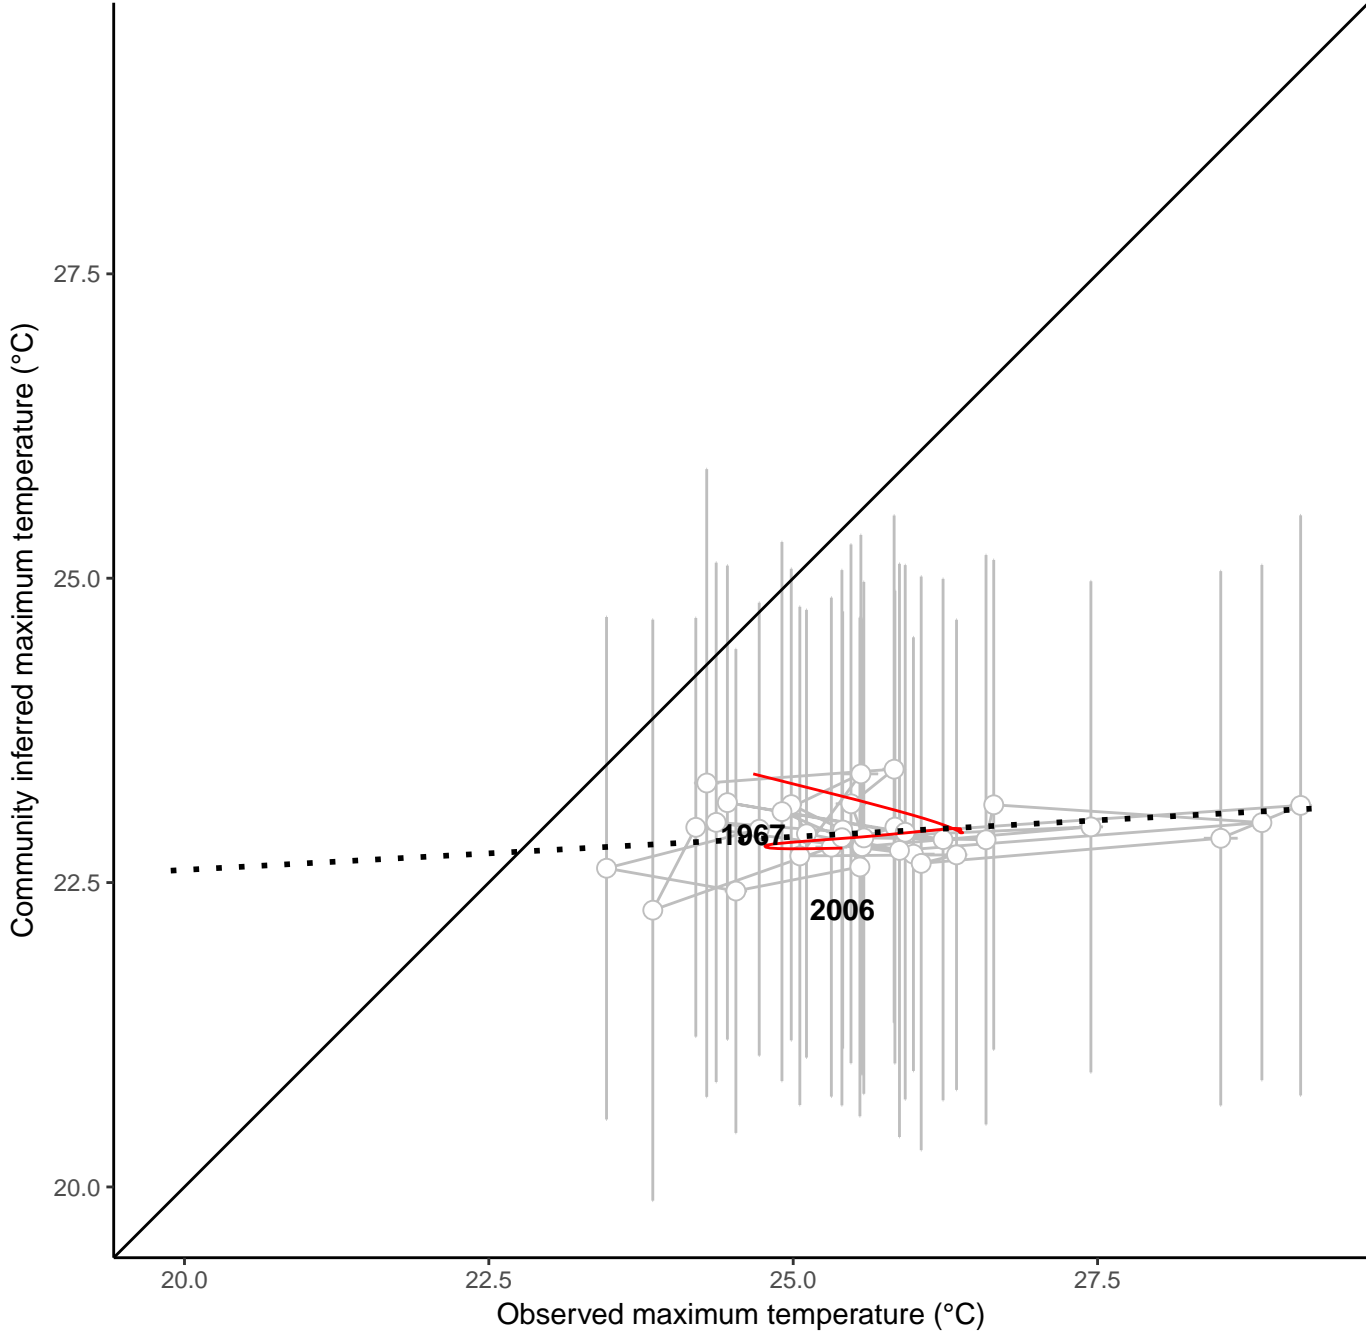

site : 840\_36\_6

absolute deviation = 2.56 | deviation change = 1.14 | maximum state number = 1

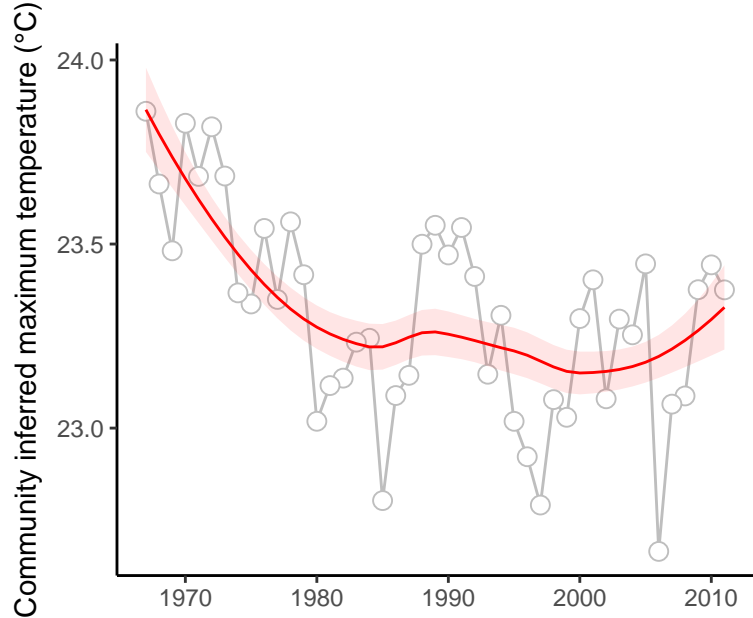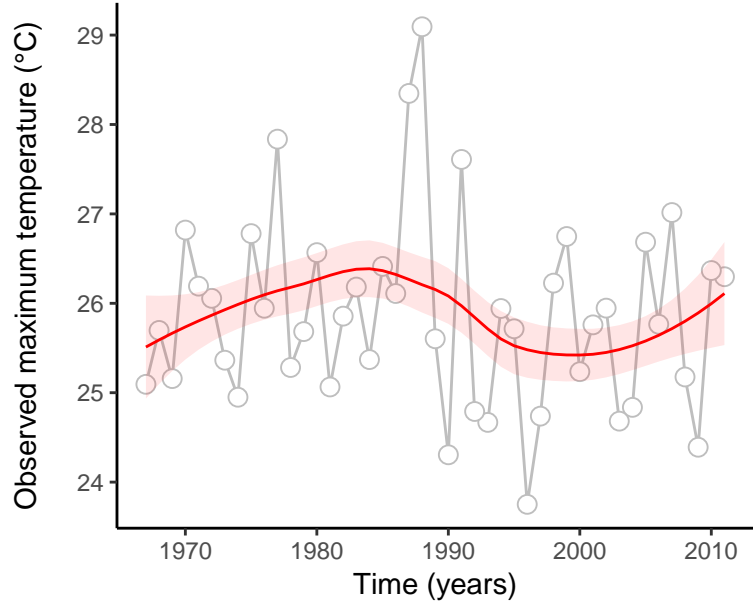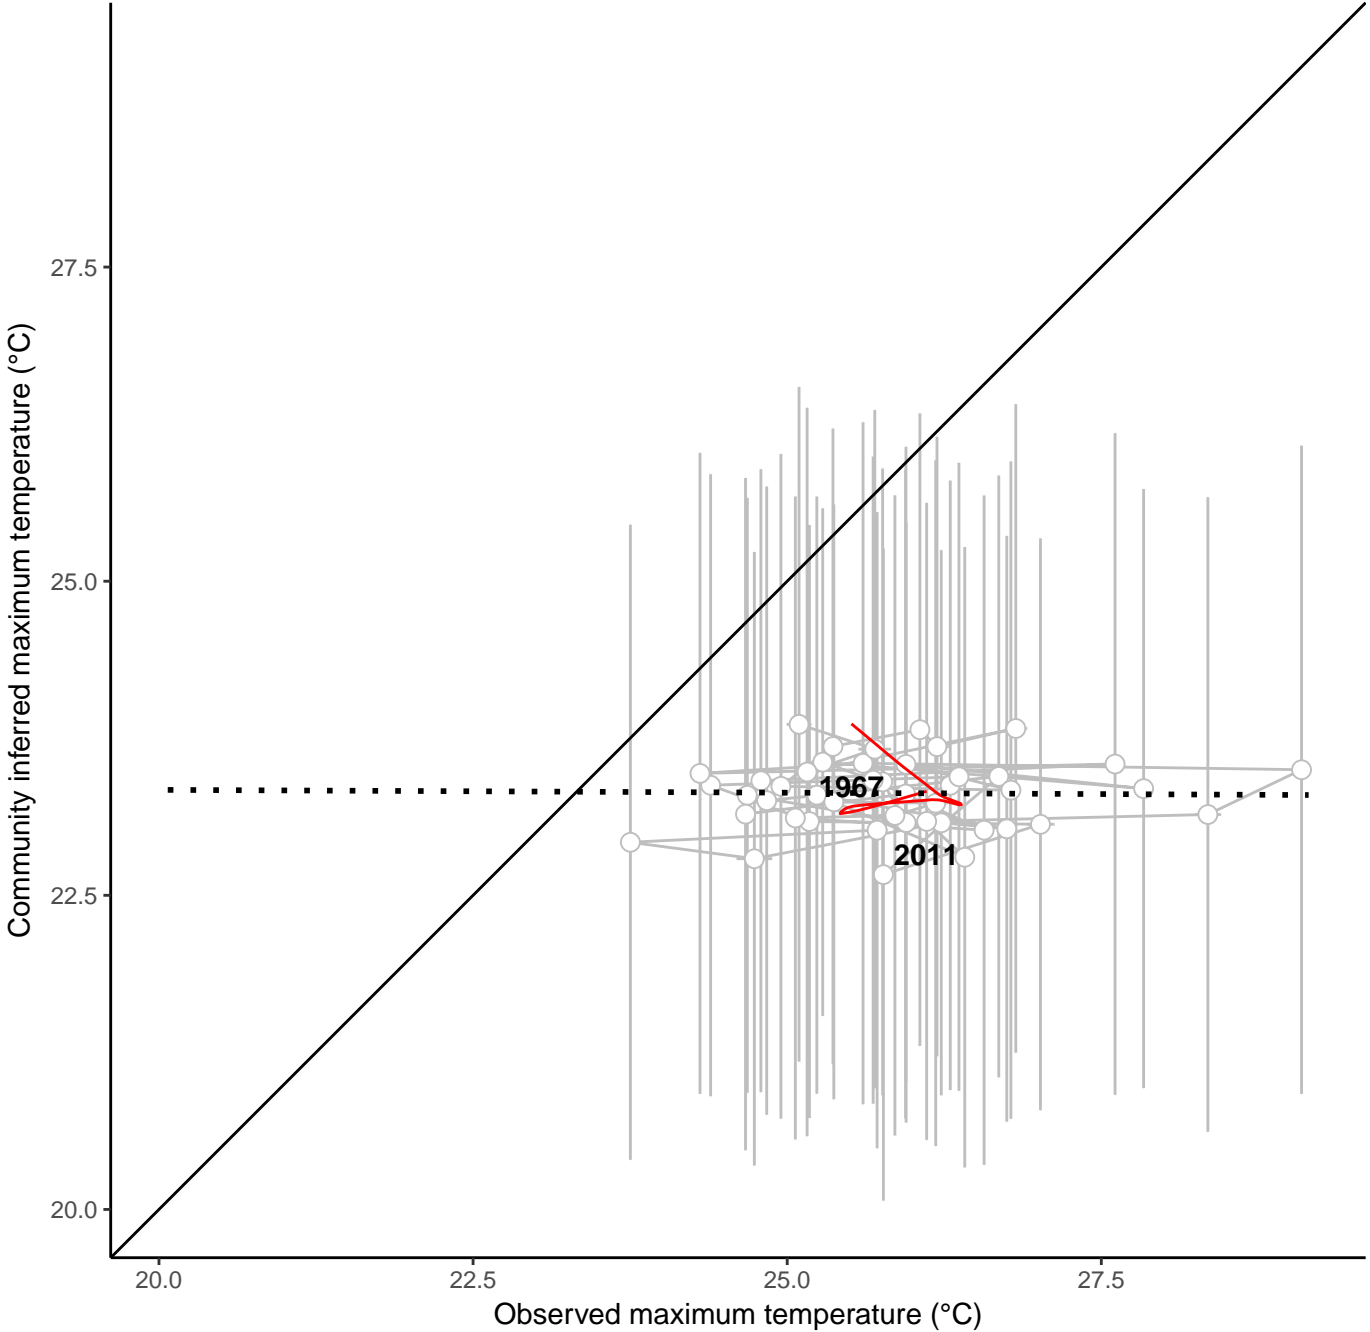

site : 840\_38\_12

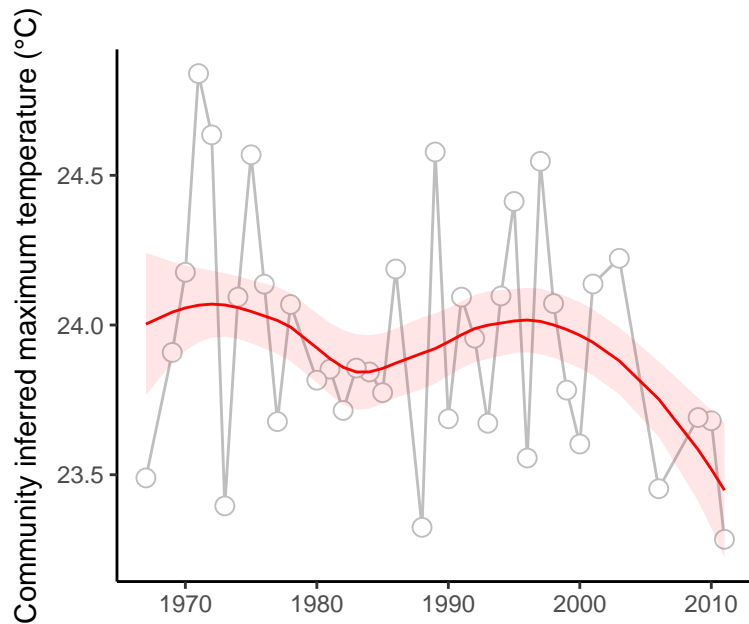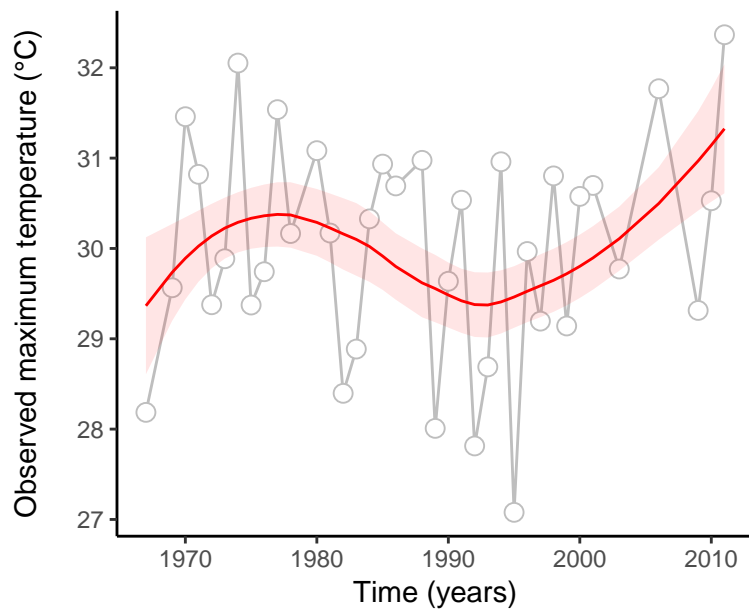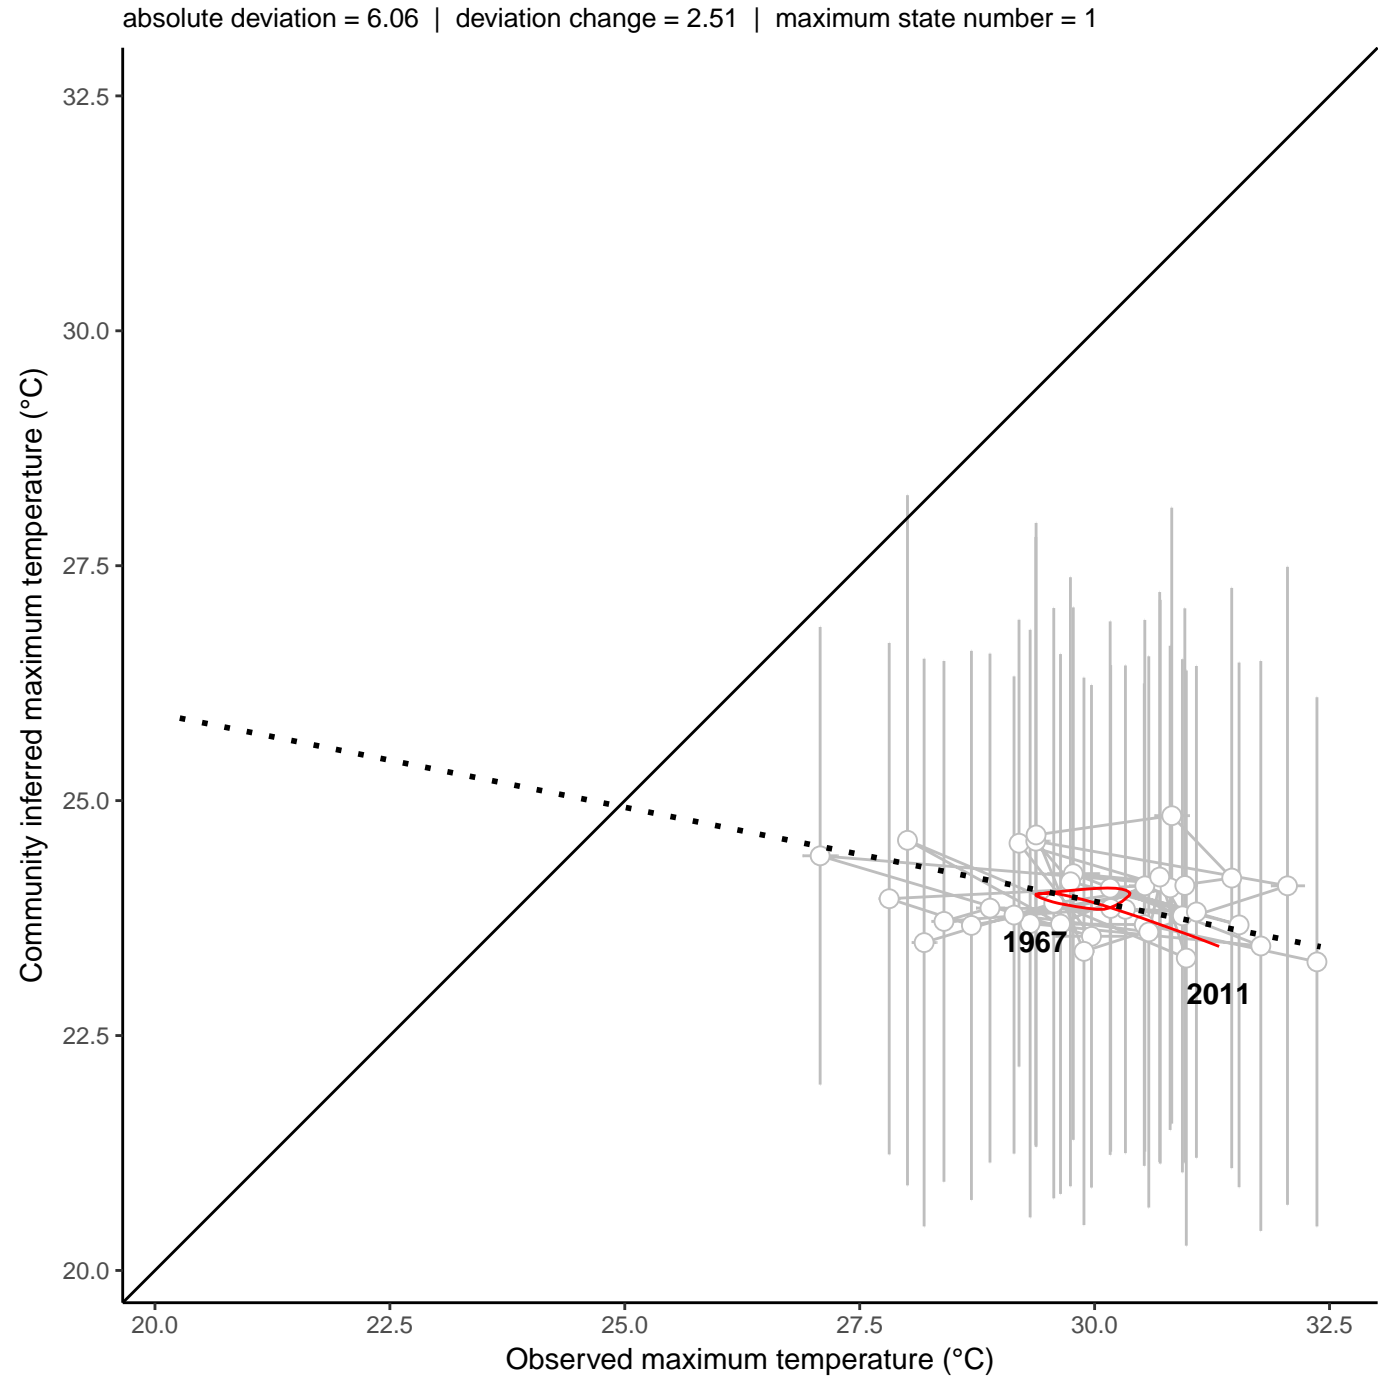

site : 840\_38\_17

absolute deviation = 3.4 | deviation change = 0.85 | maximum state number = 1

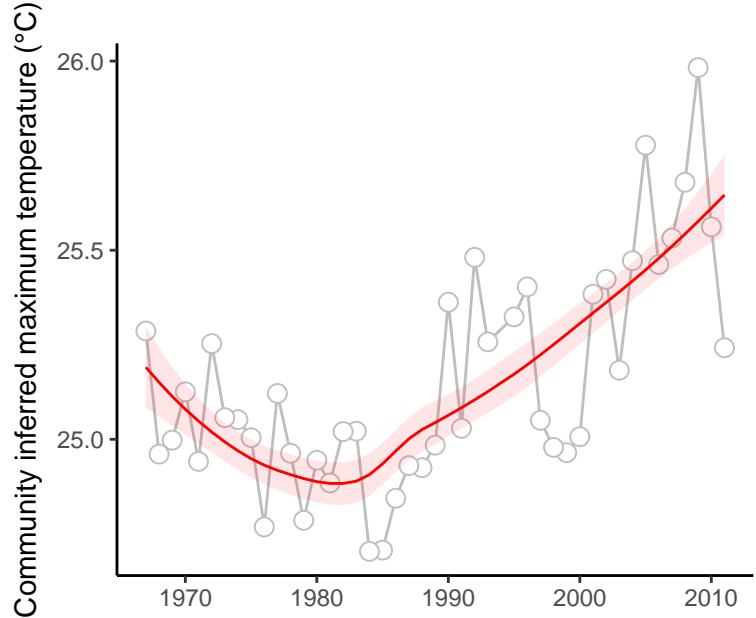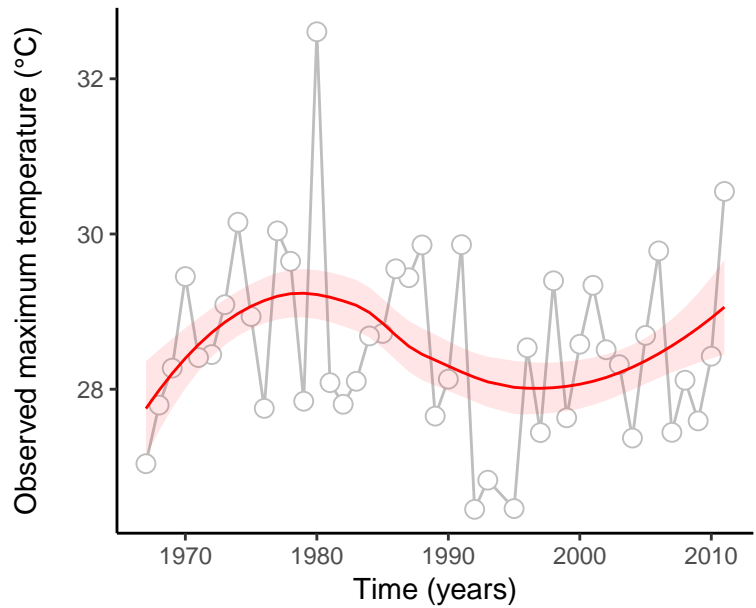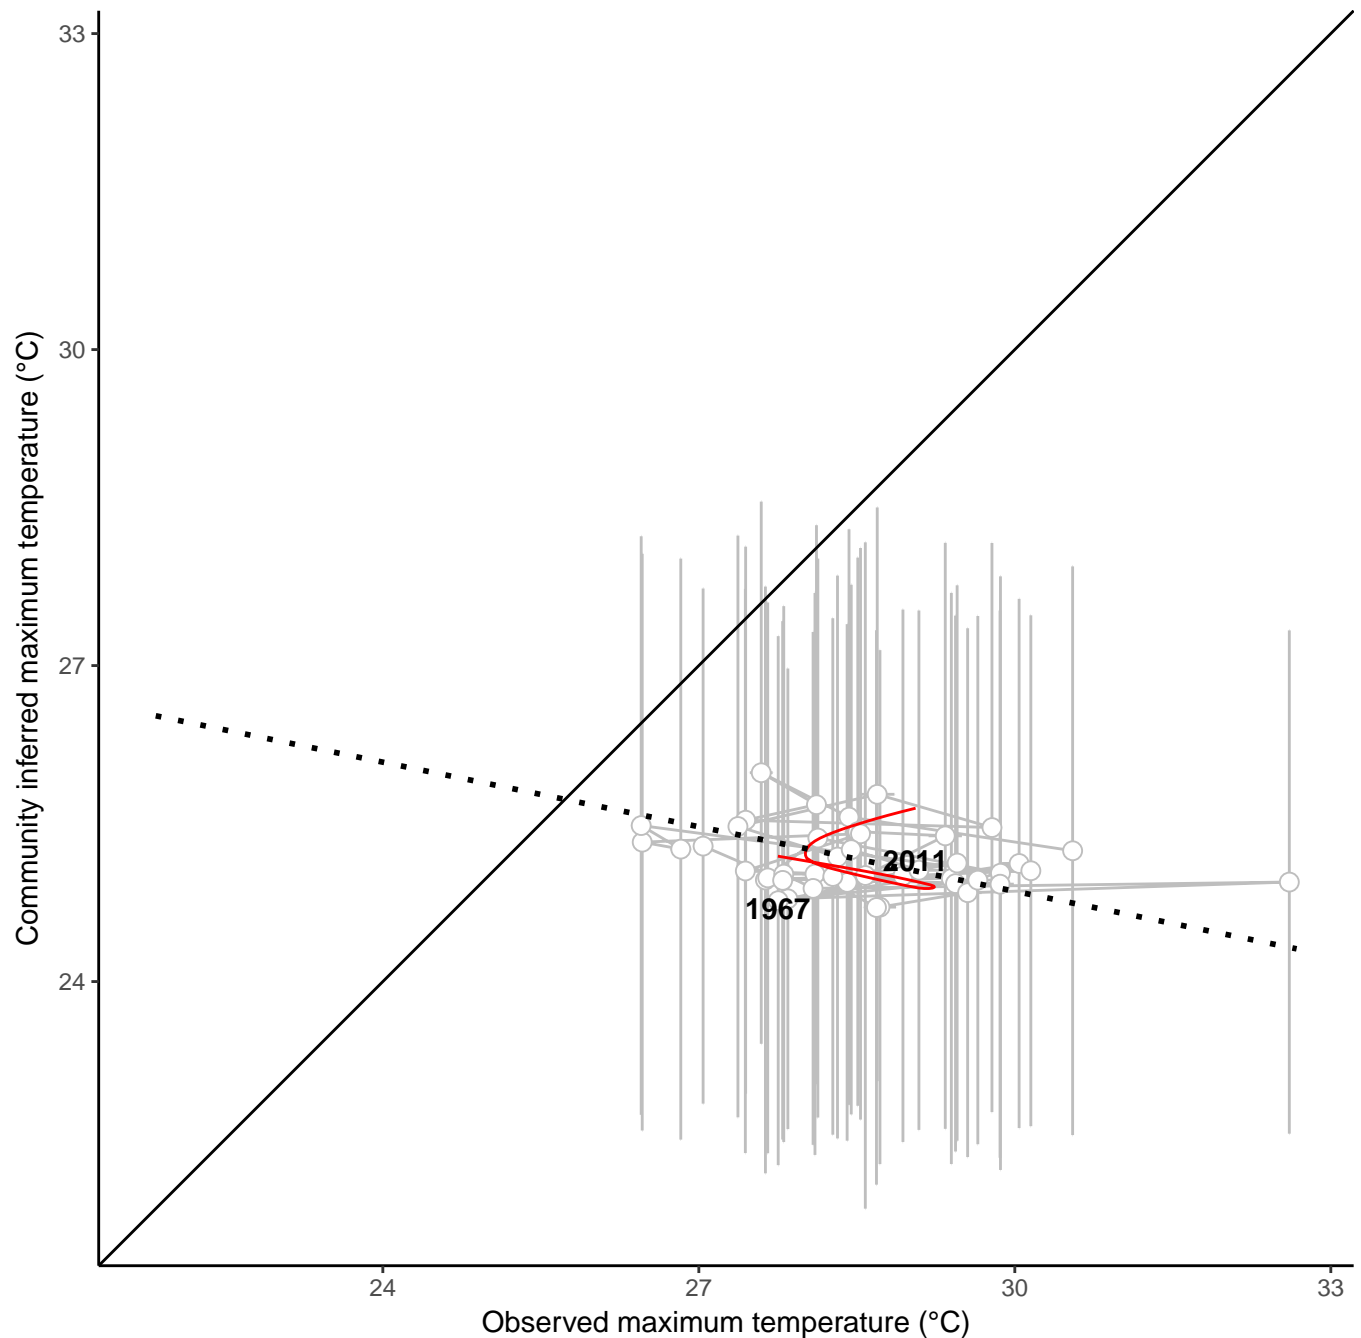

site : 840\_38\_20

absolute deviation = 5.81 | deviation change = 0.16 | maximum state number = 1

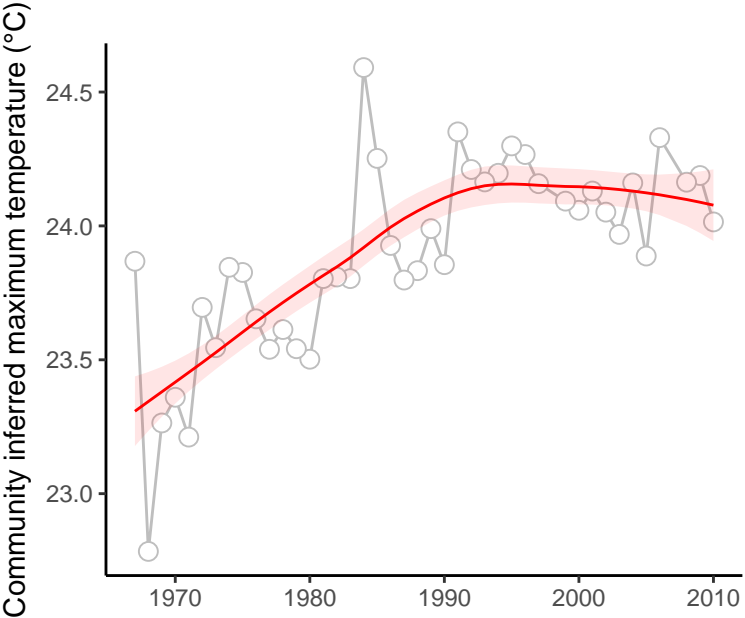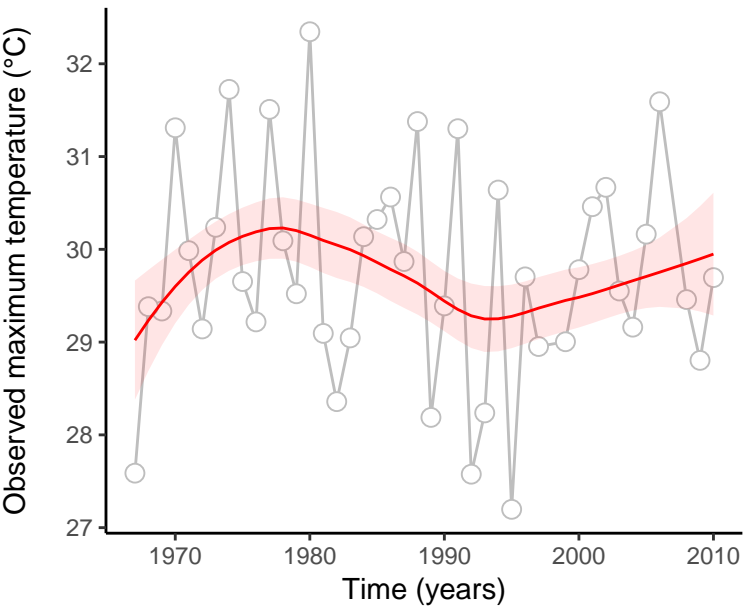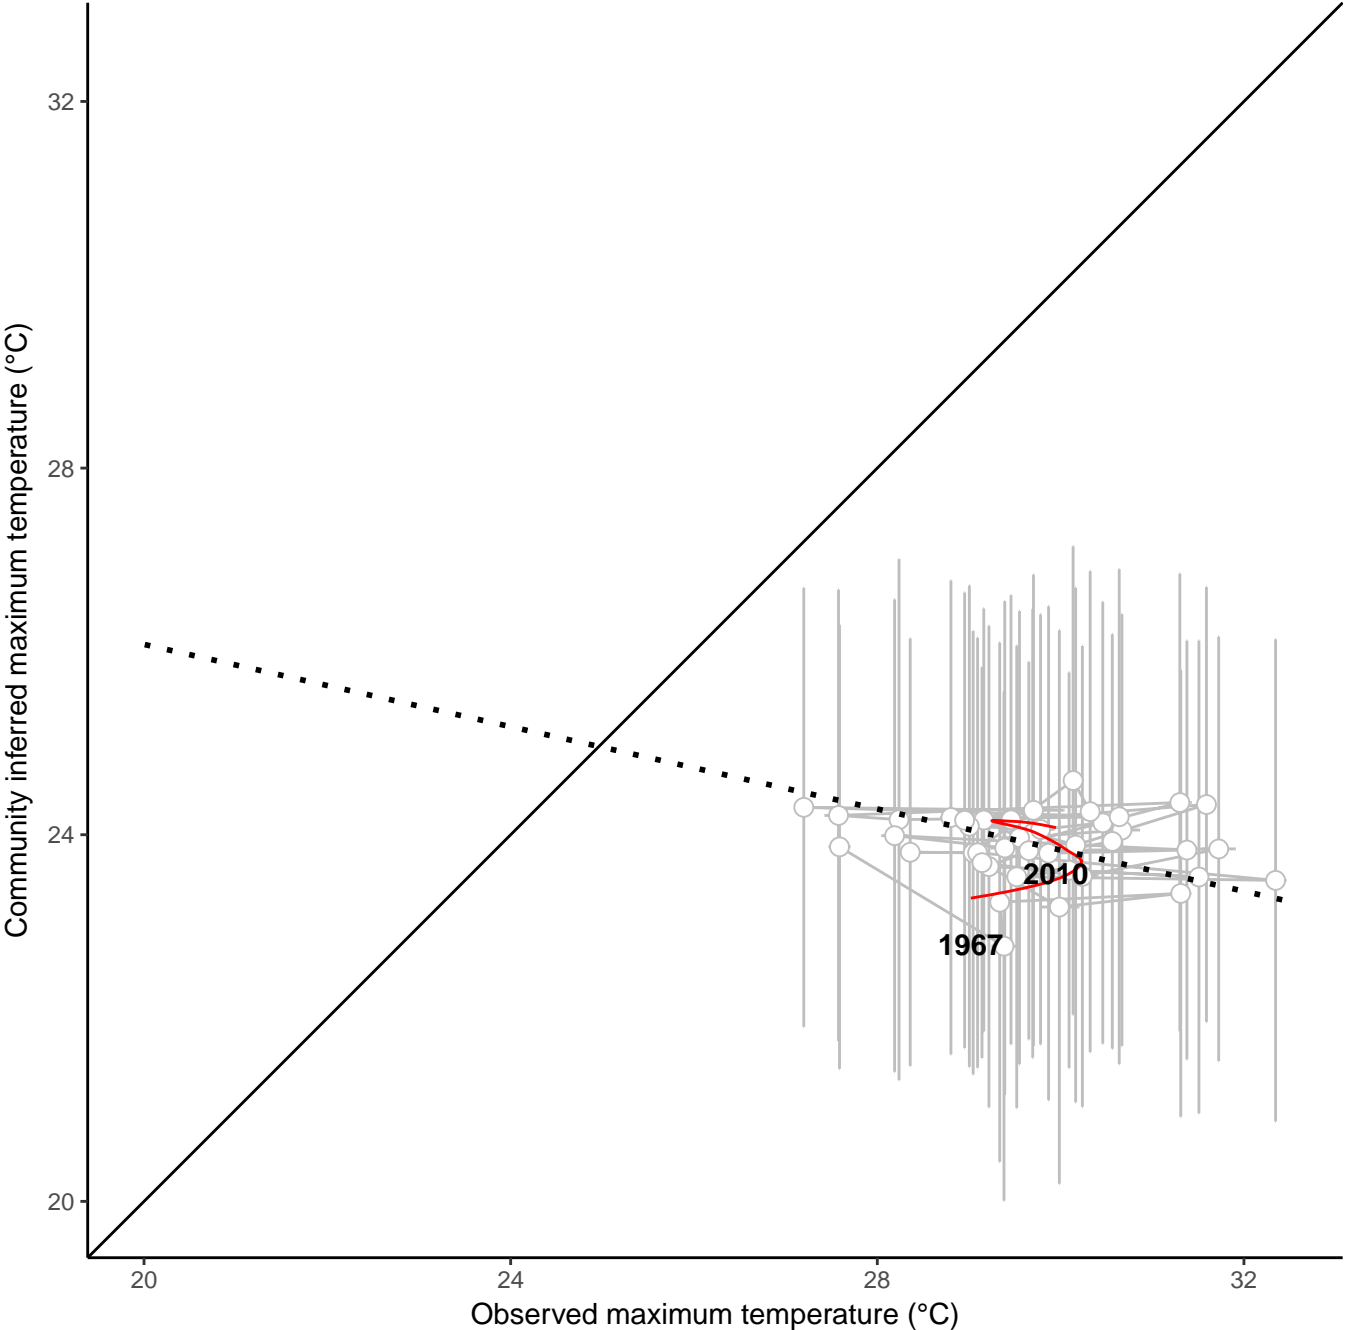



site : 840\_38\_22

absolute deviation = 5.62 | deviation change = 2.03 | maximum state number = 1

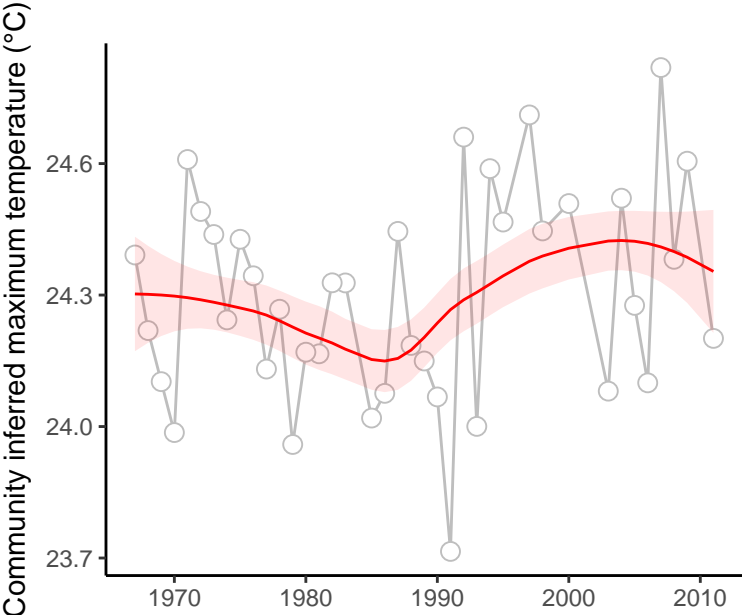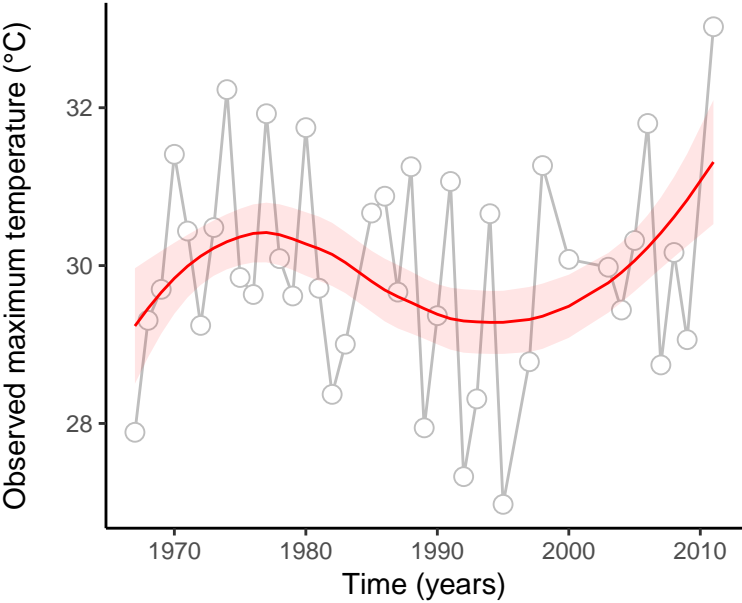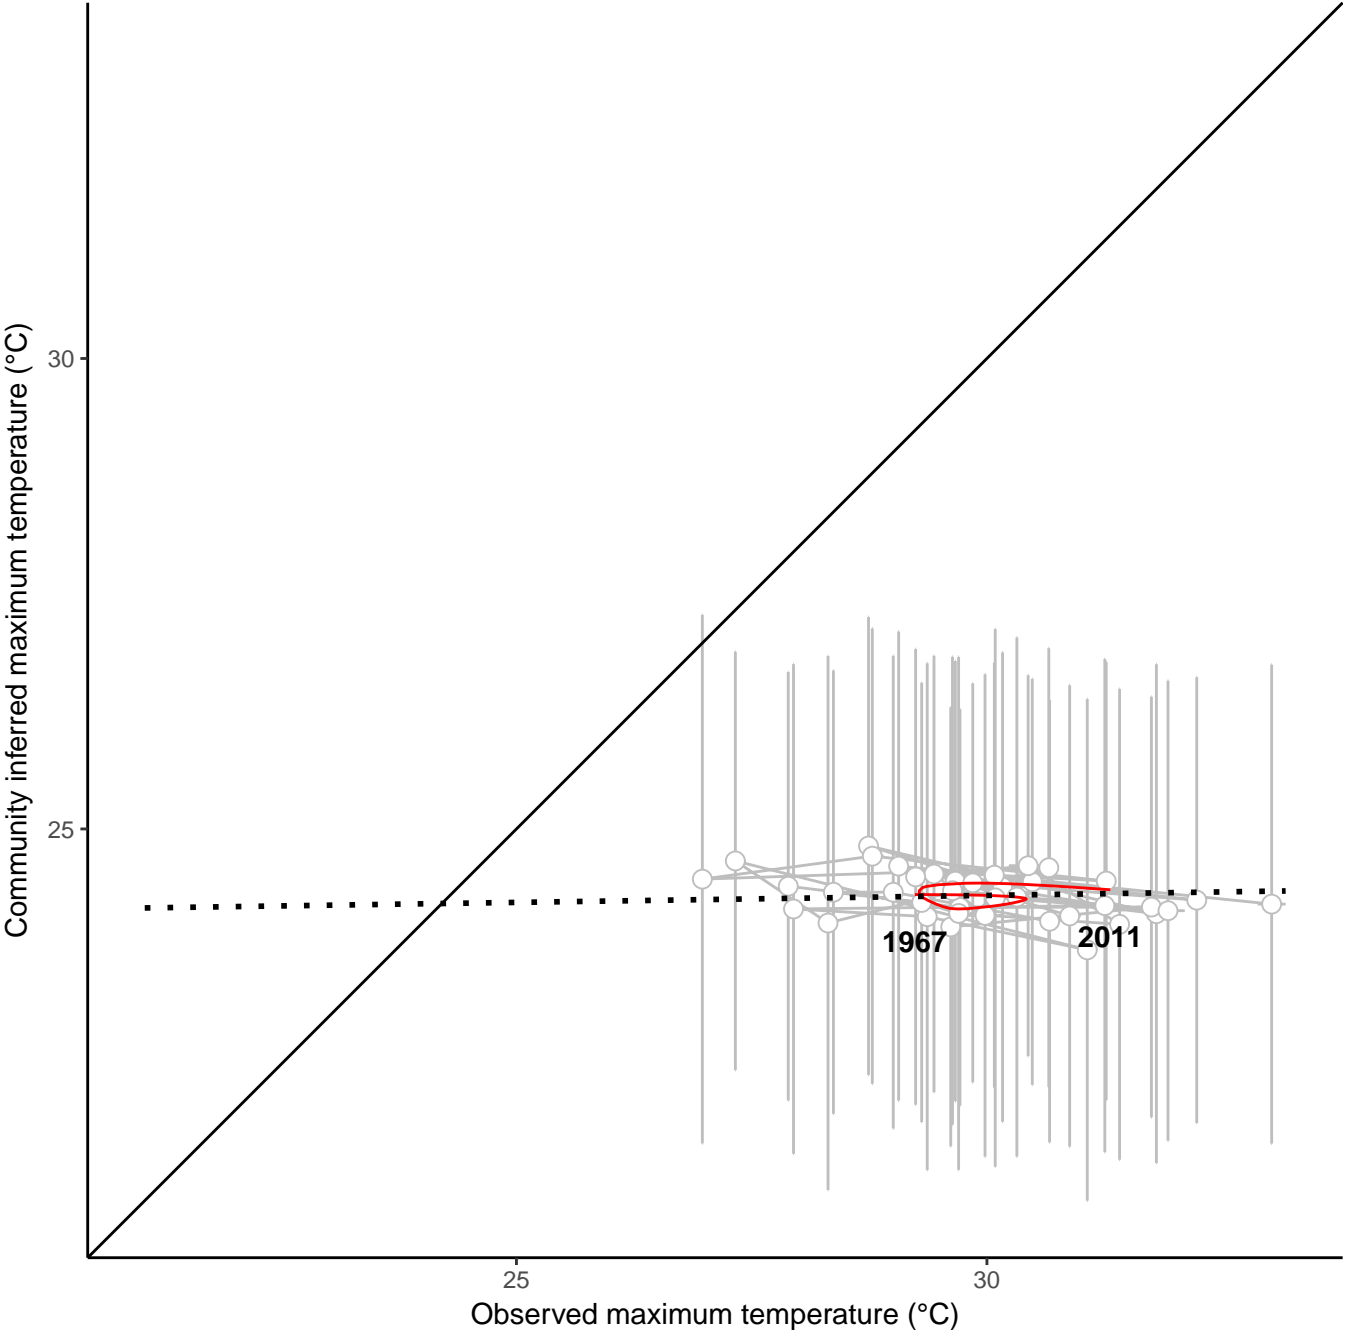

site : 840\_38\_24

absolute deviation = 5.39 | deviation change = 1.52 | maximum state number = 1

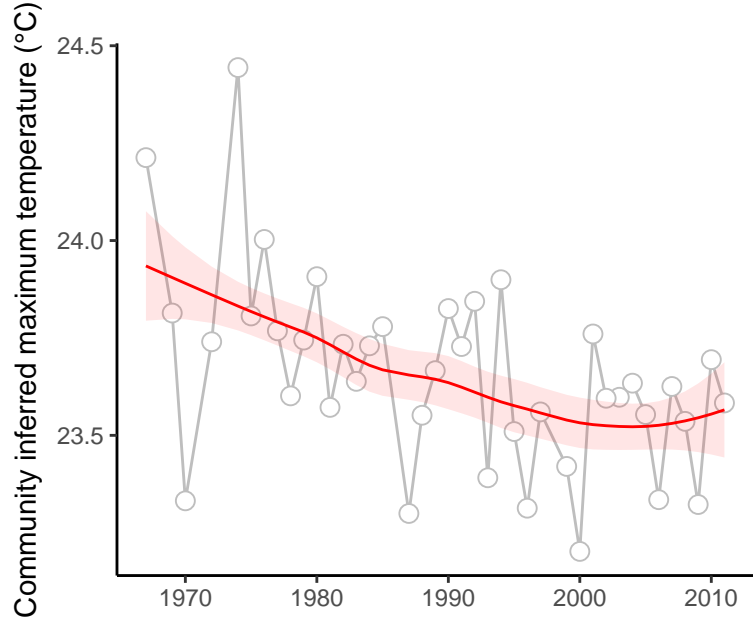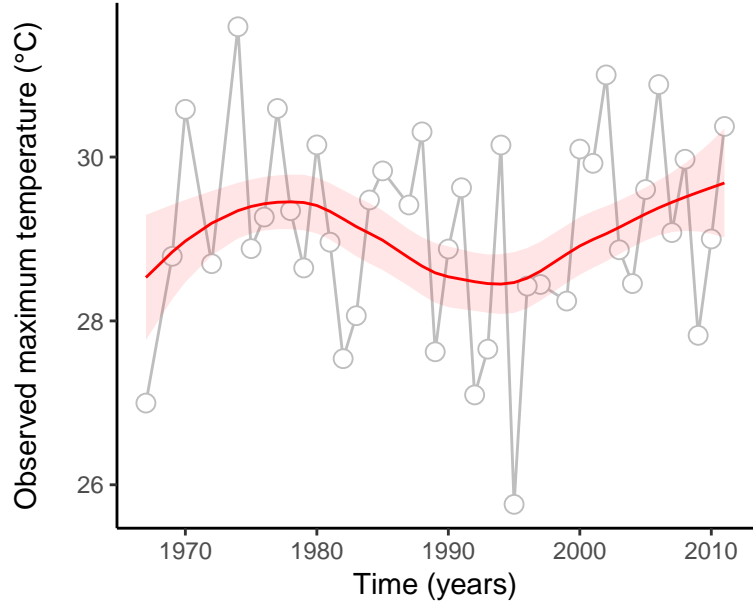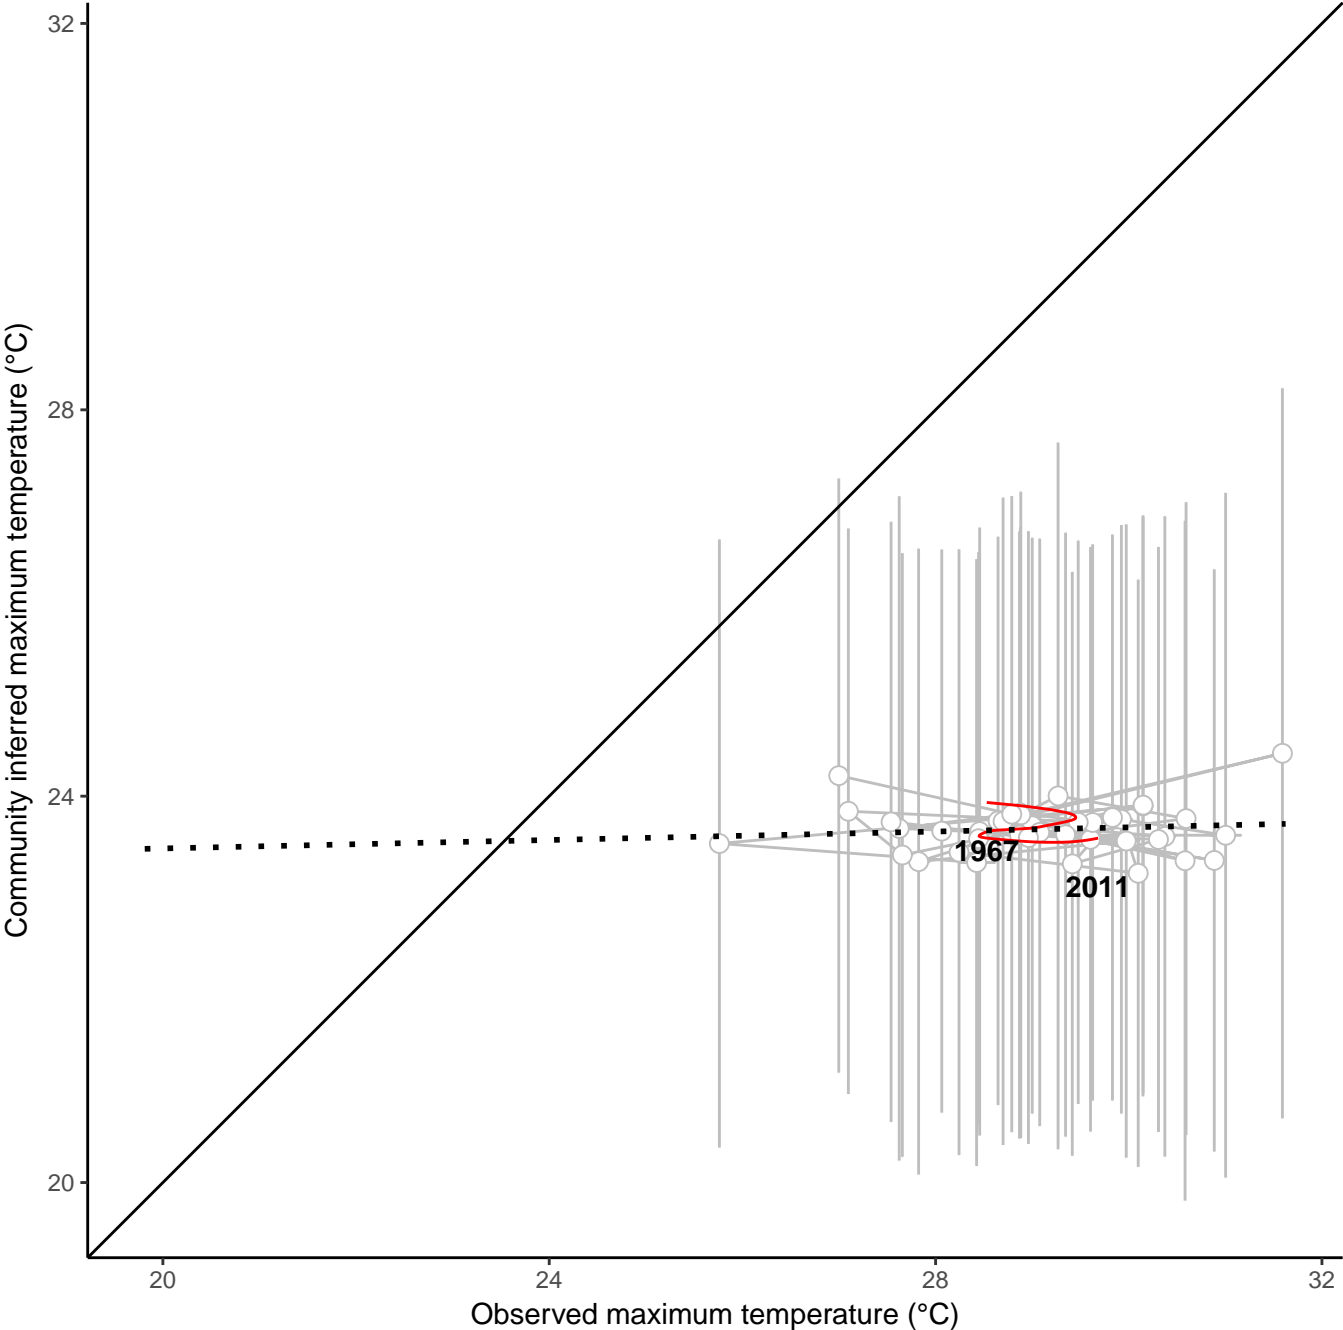

site : 840\_50\_10

absolute deviation = 2.36 | deviation change = 1.44 | maximum state number = 1

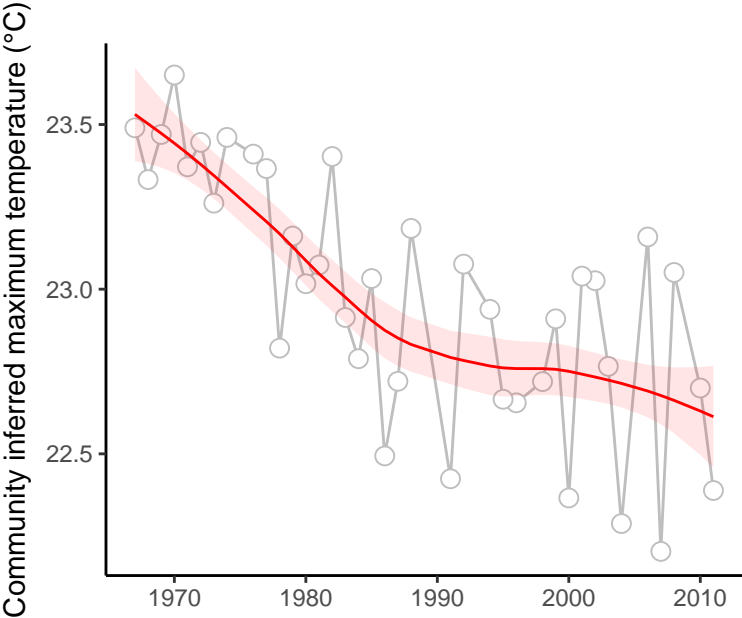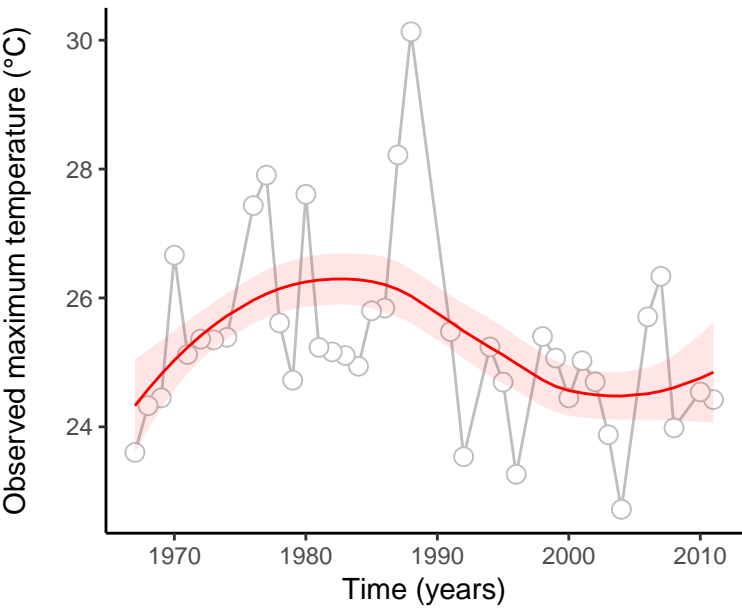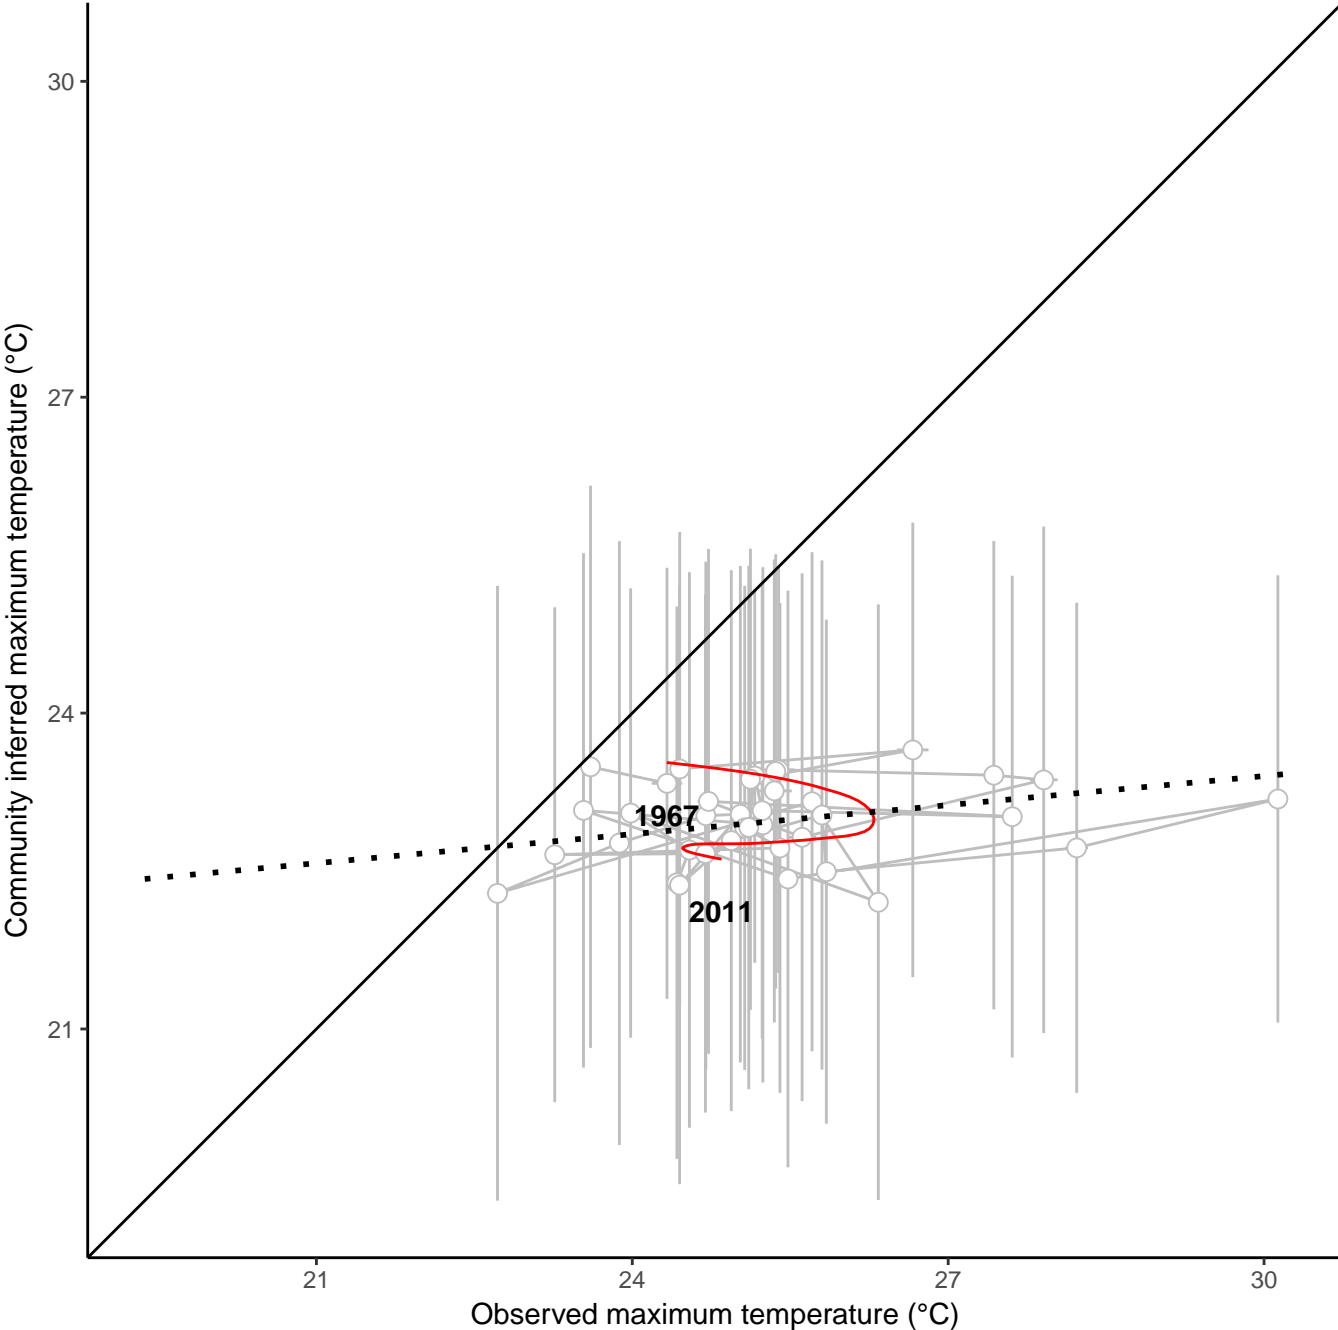

site : 840\_54\_14

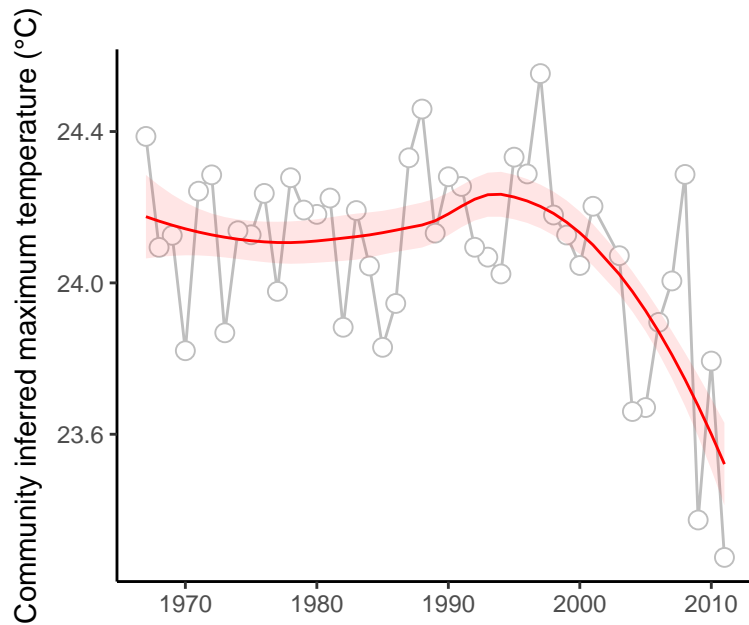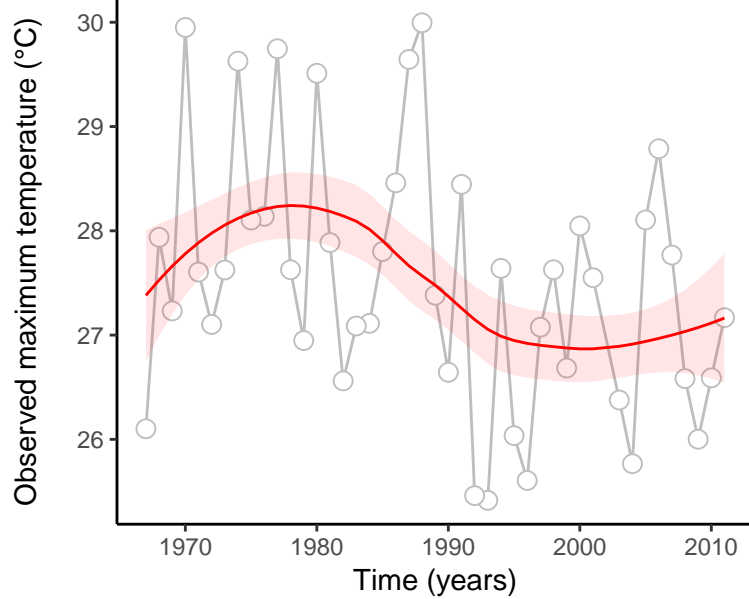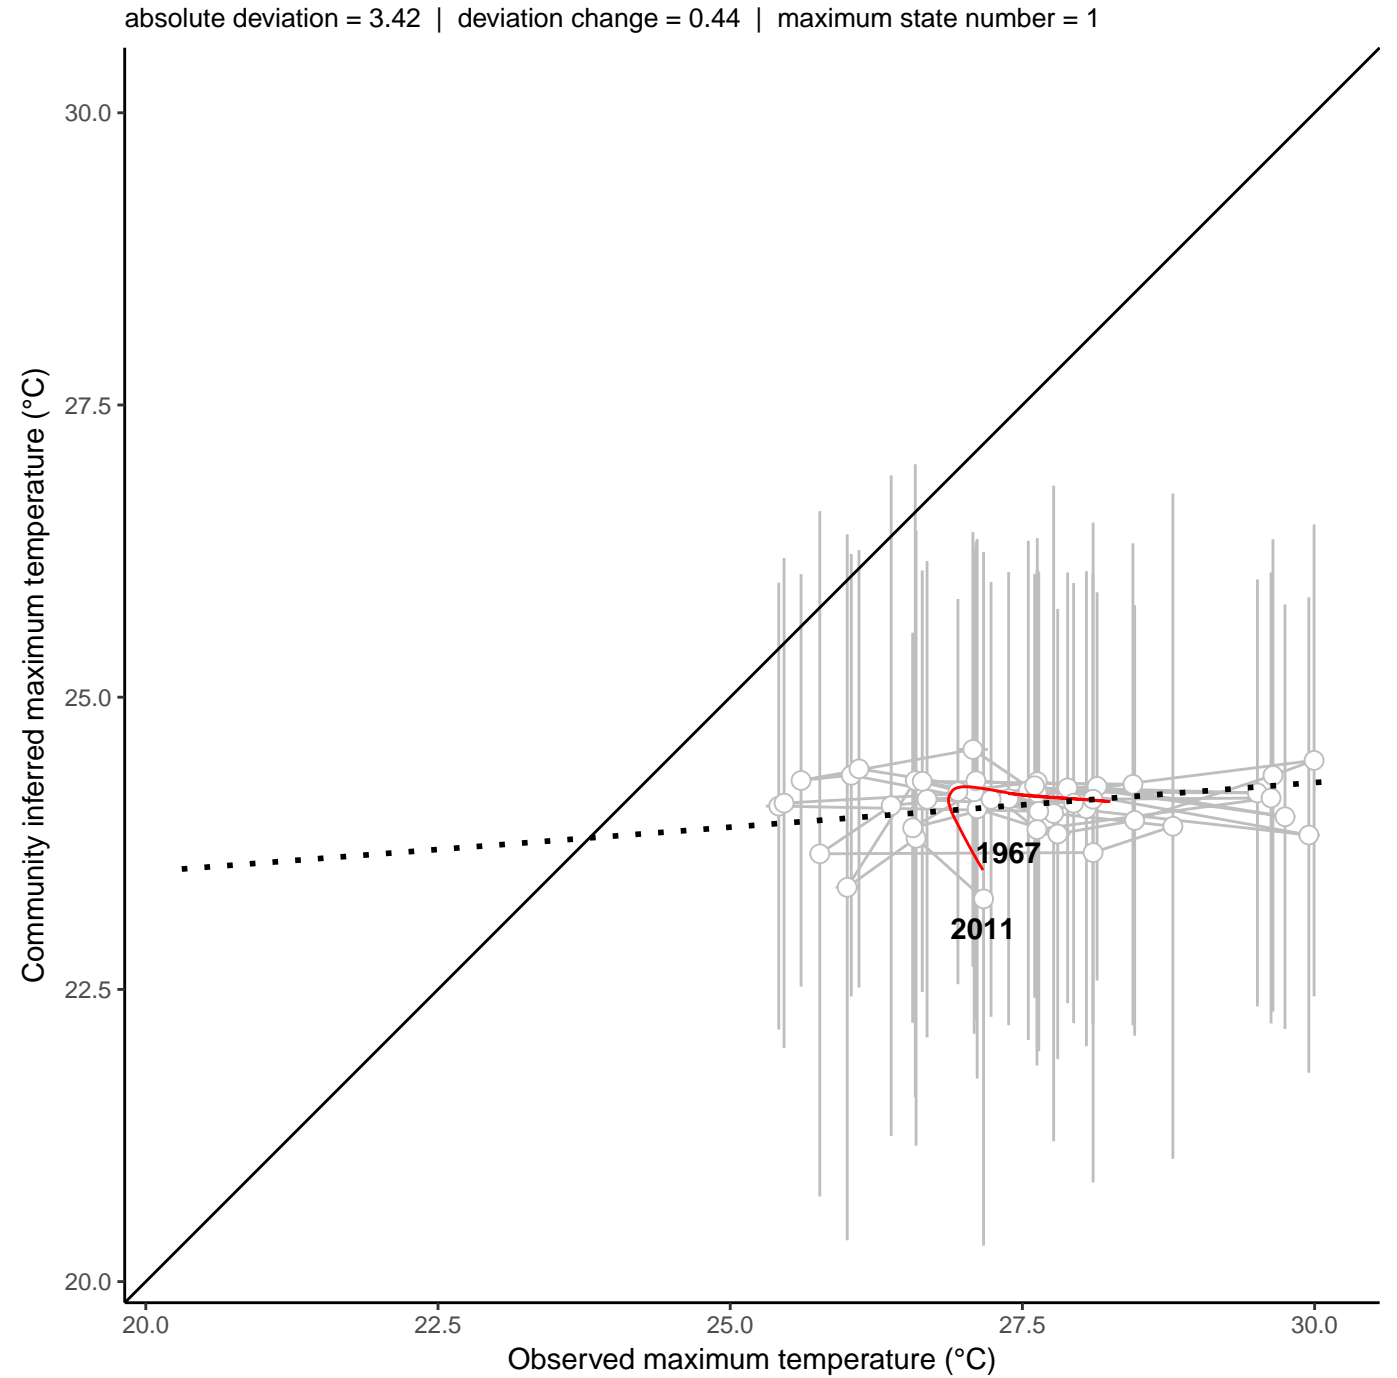

site : 840\_54\_2

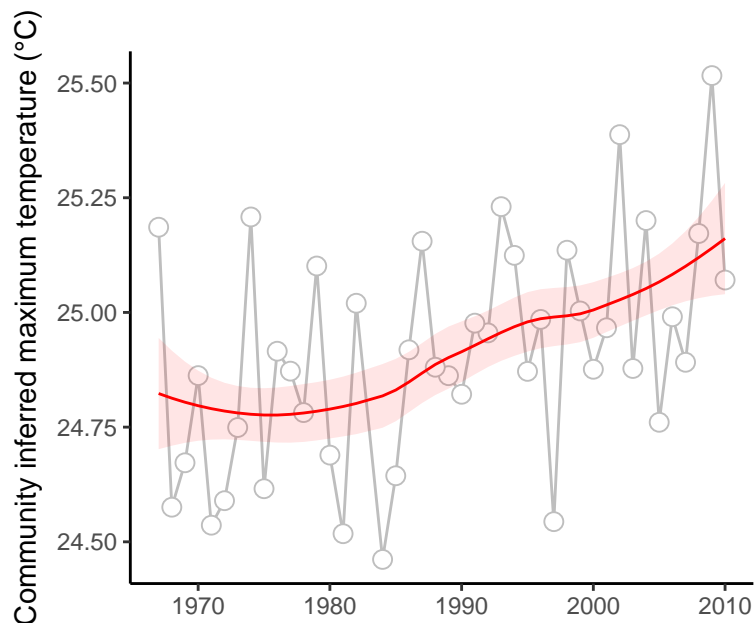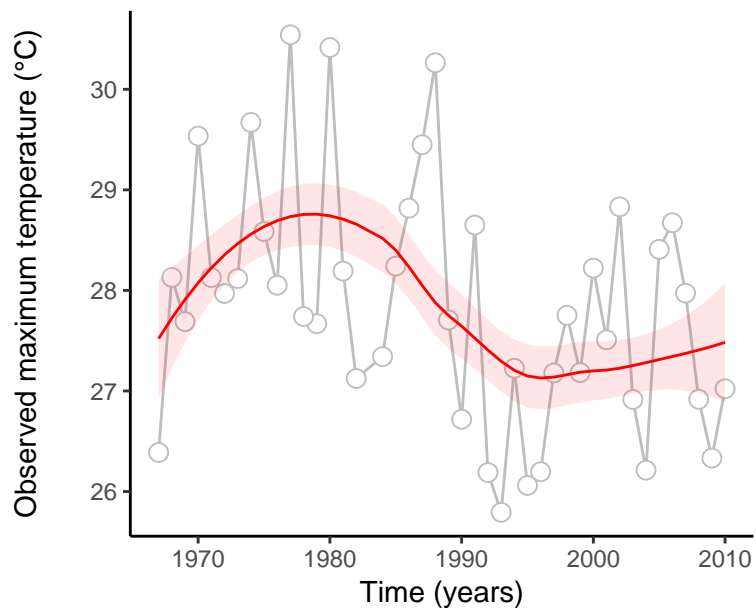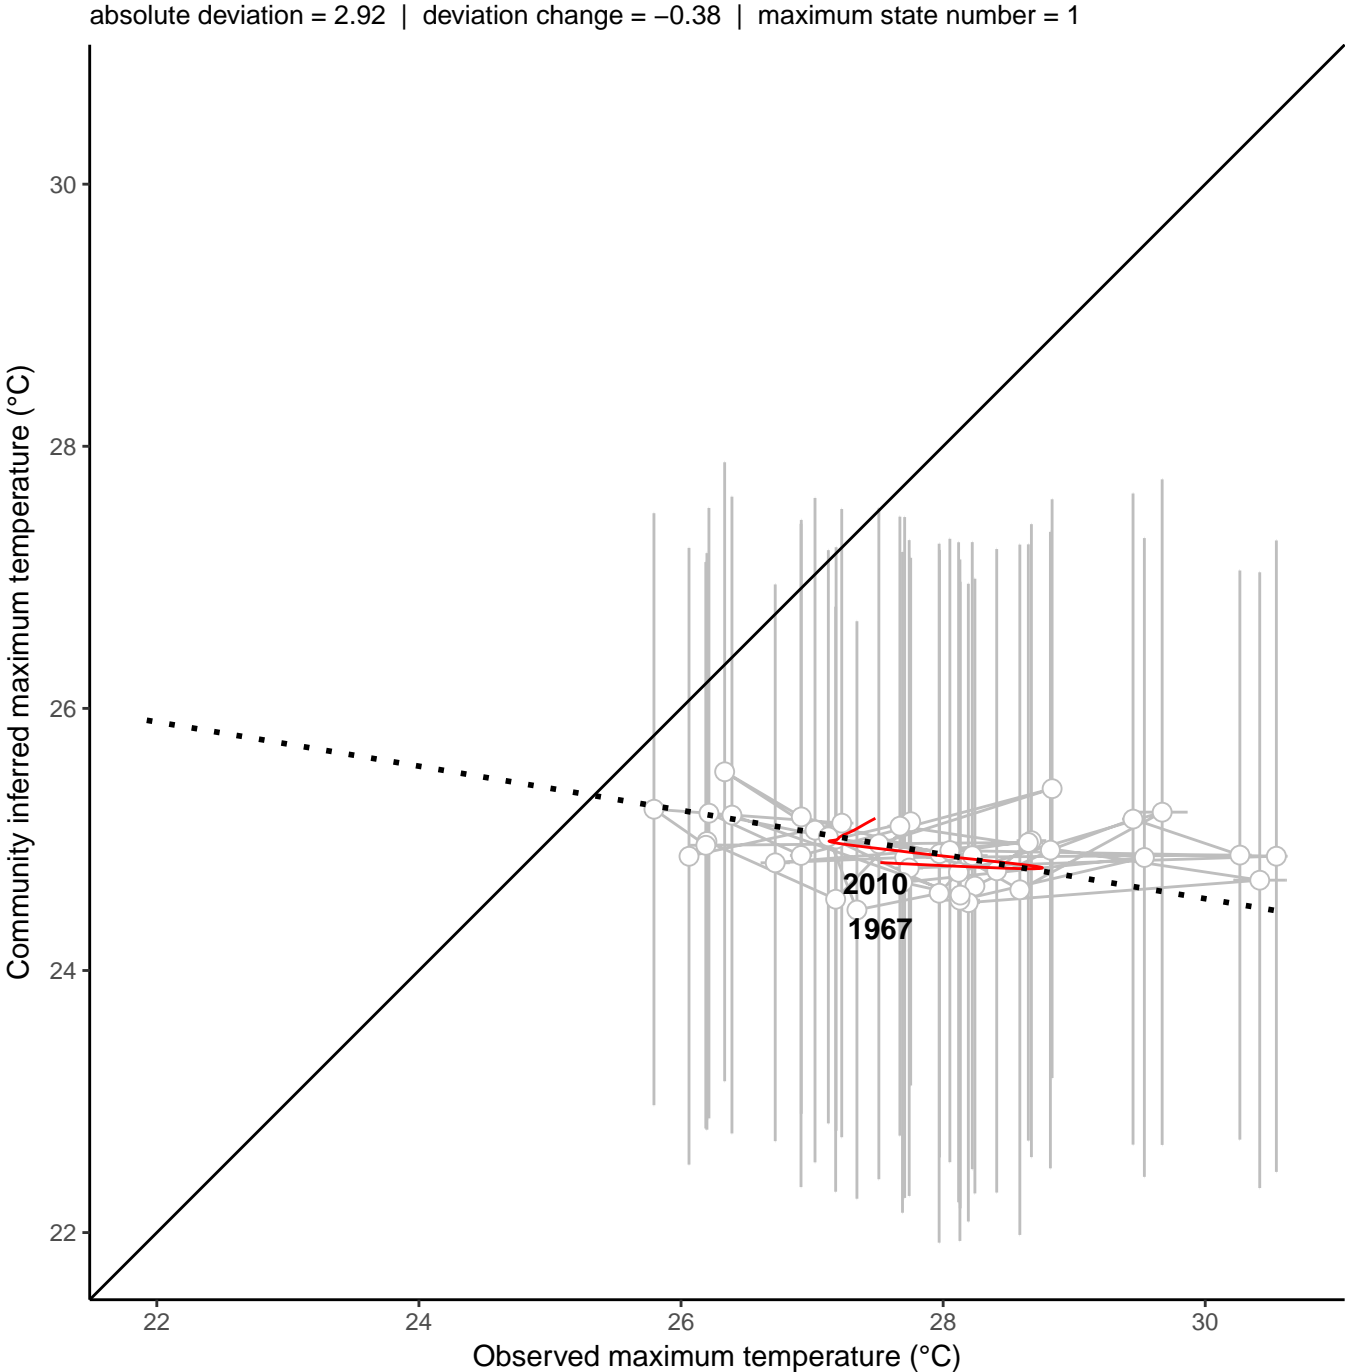

site : 840\_54\_5

absolute deviation = 3.37 | deviation change = 0.73 | maximum state number = 1

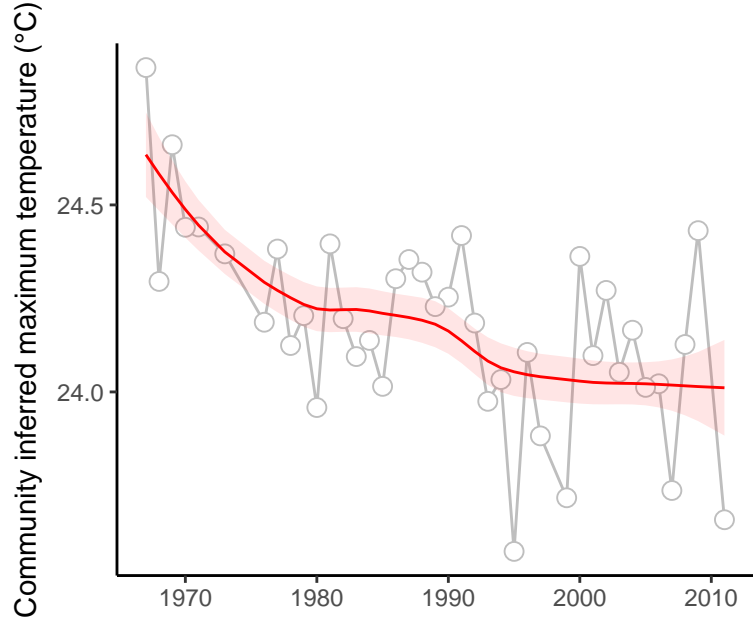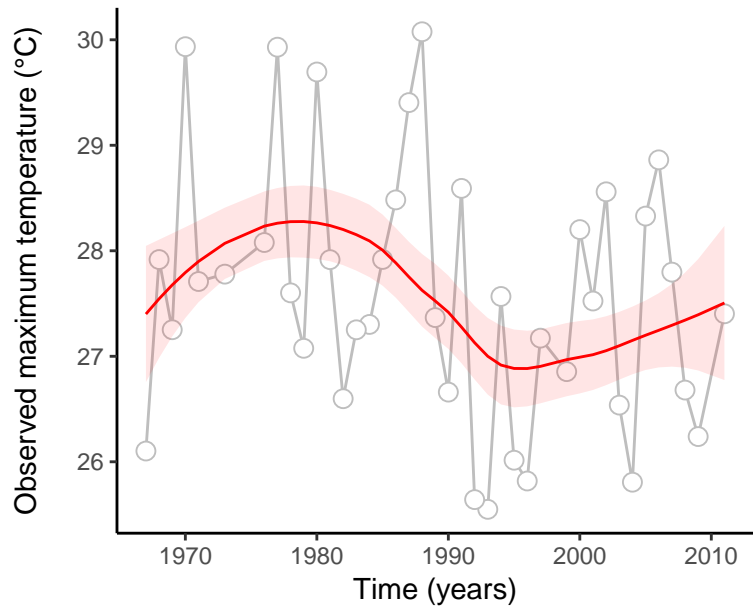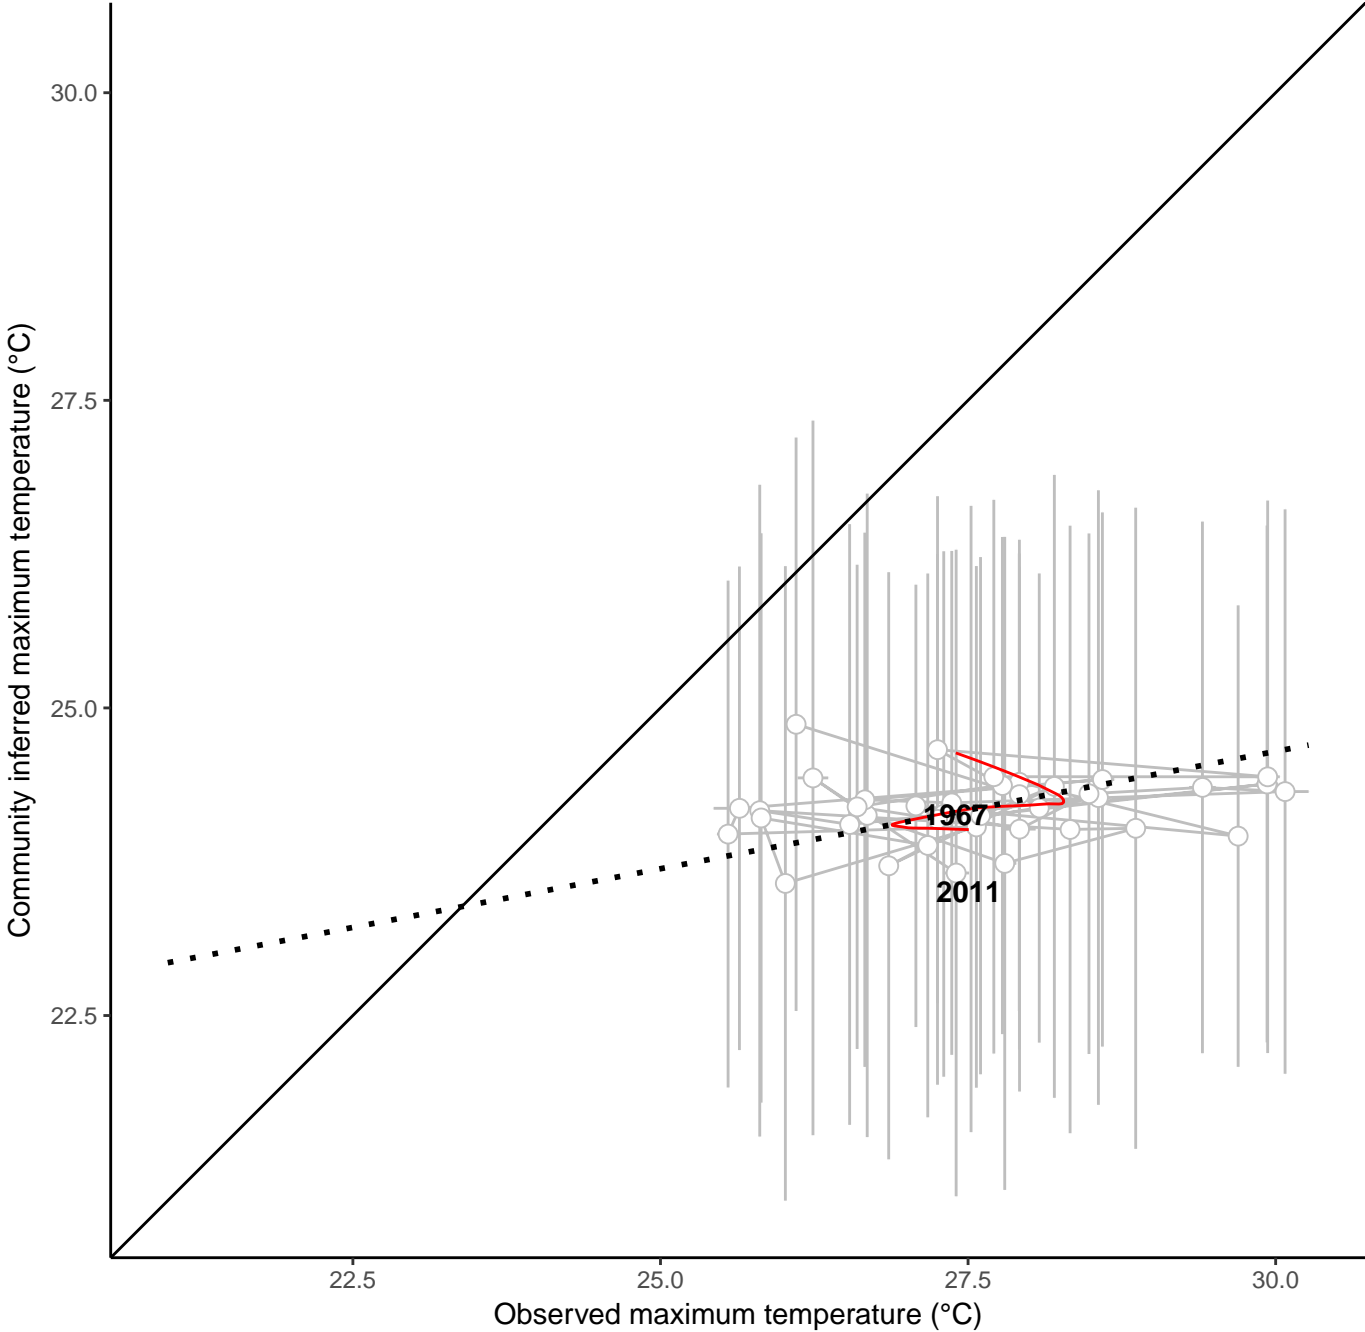

site : 840\_54\_6

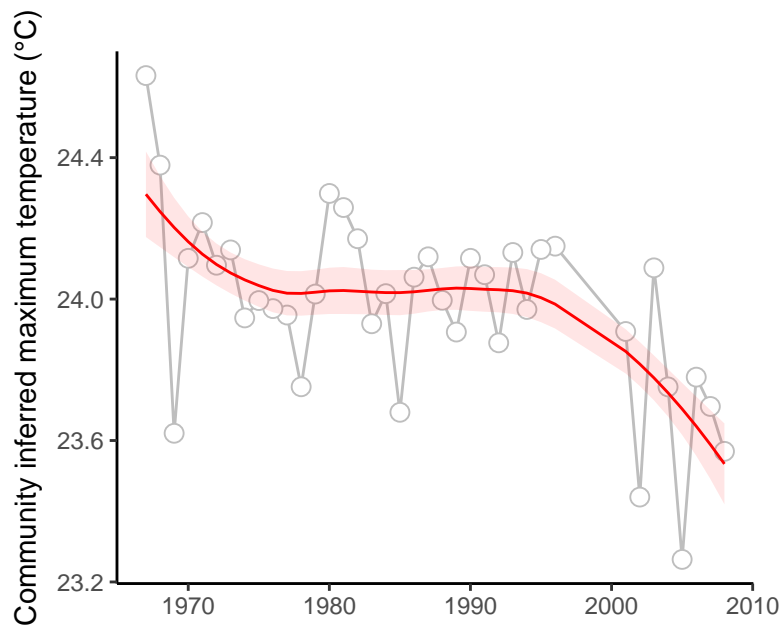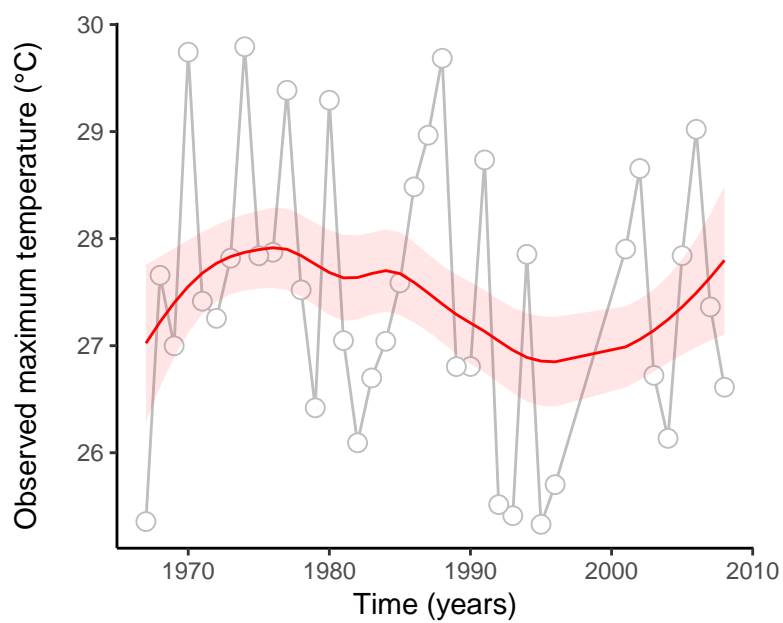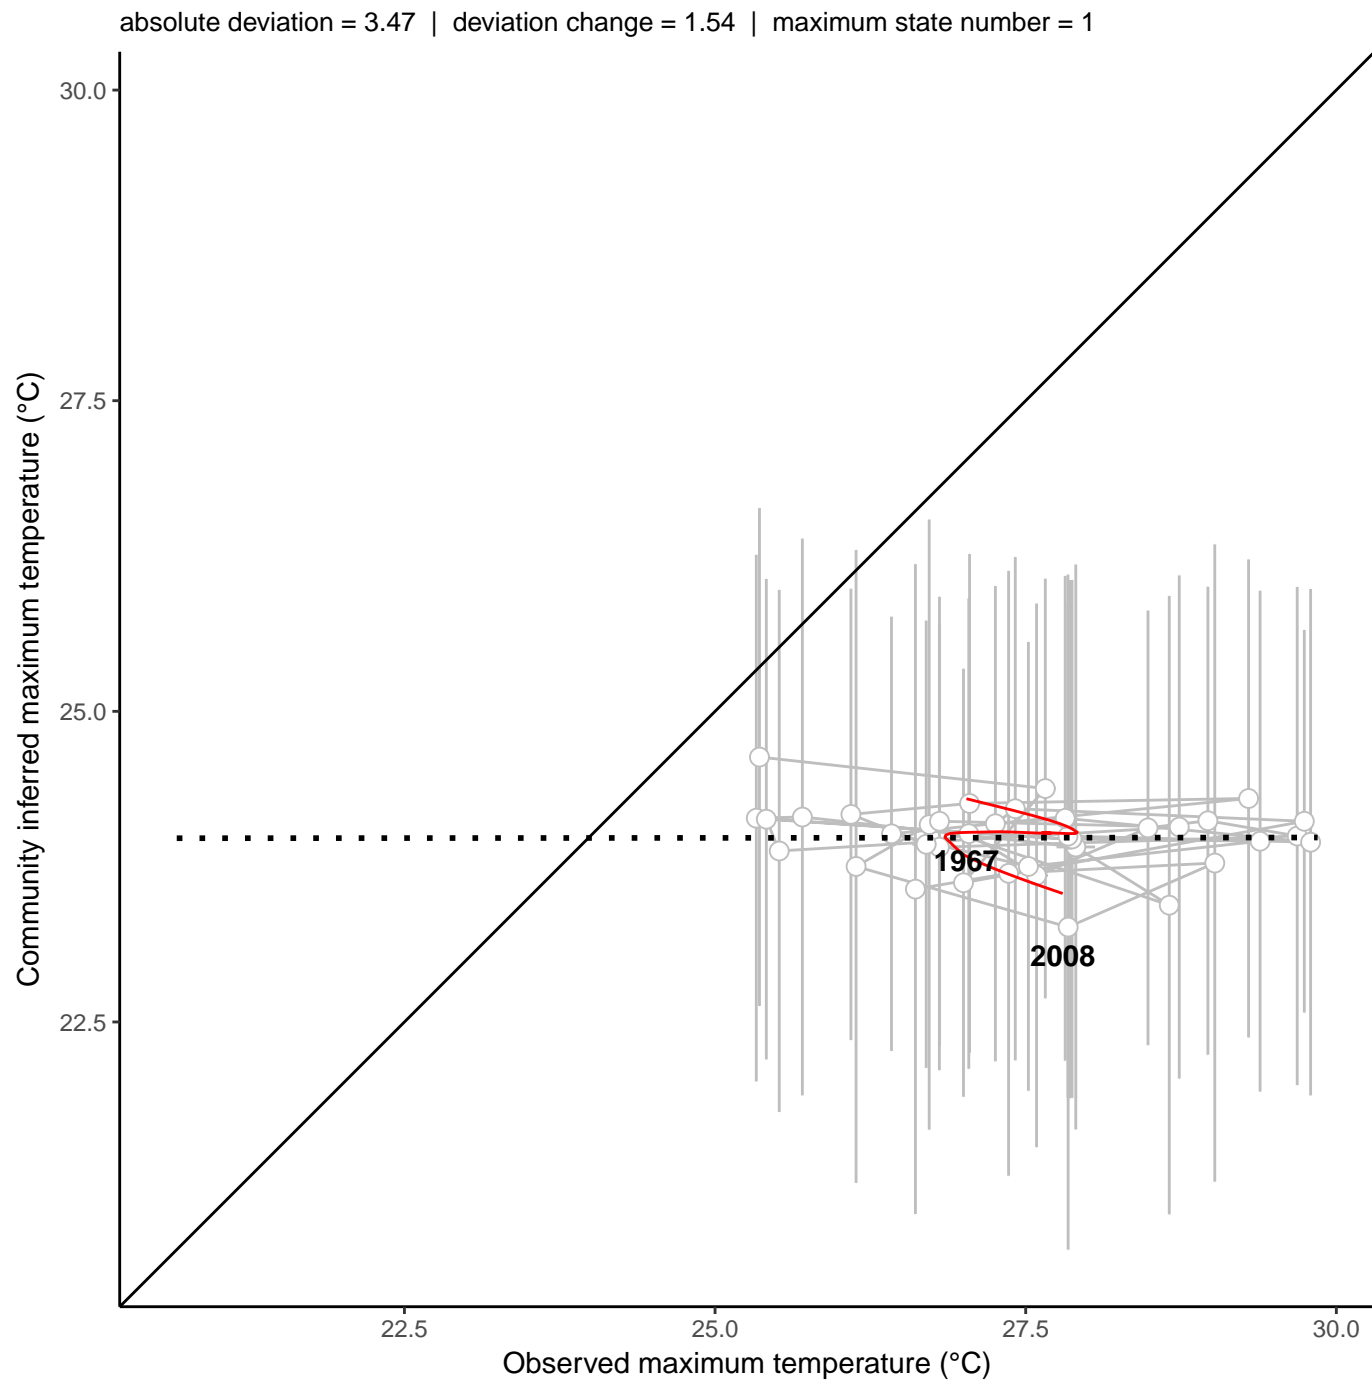

site : 840\_58\_12

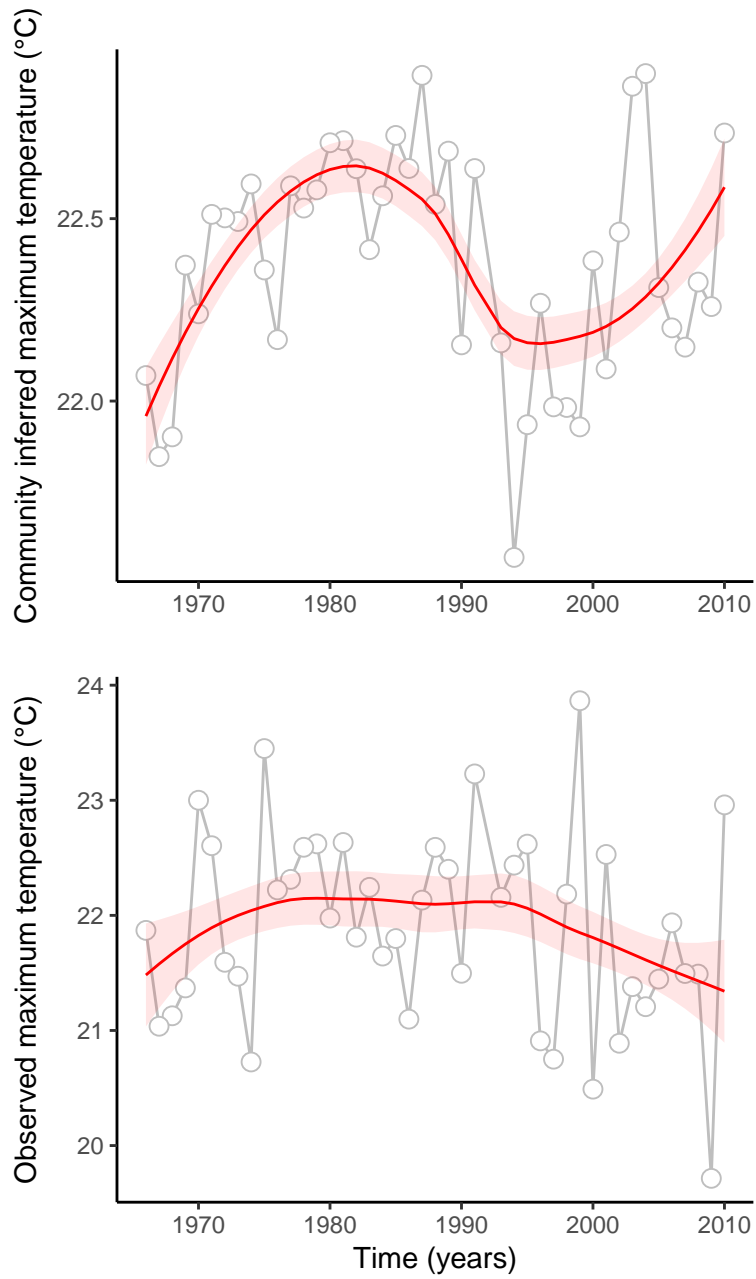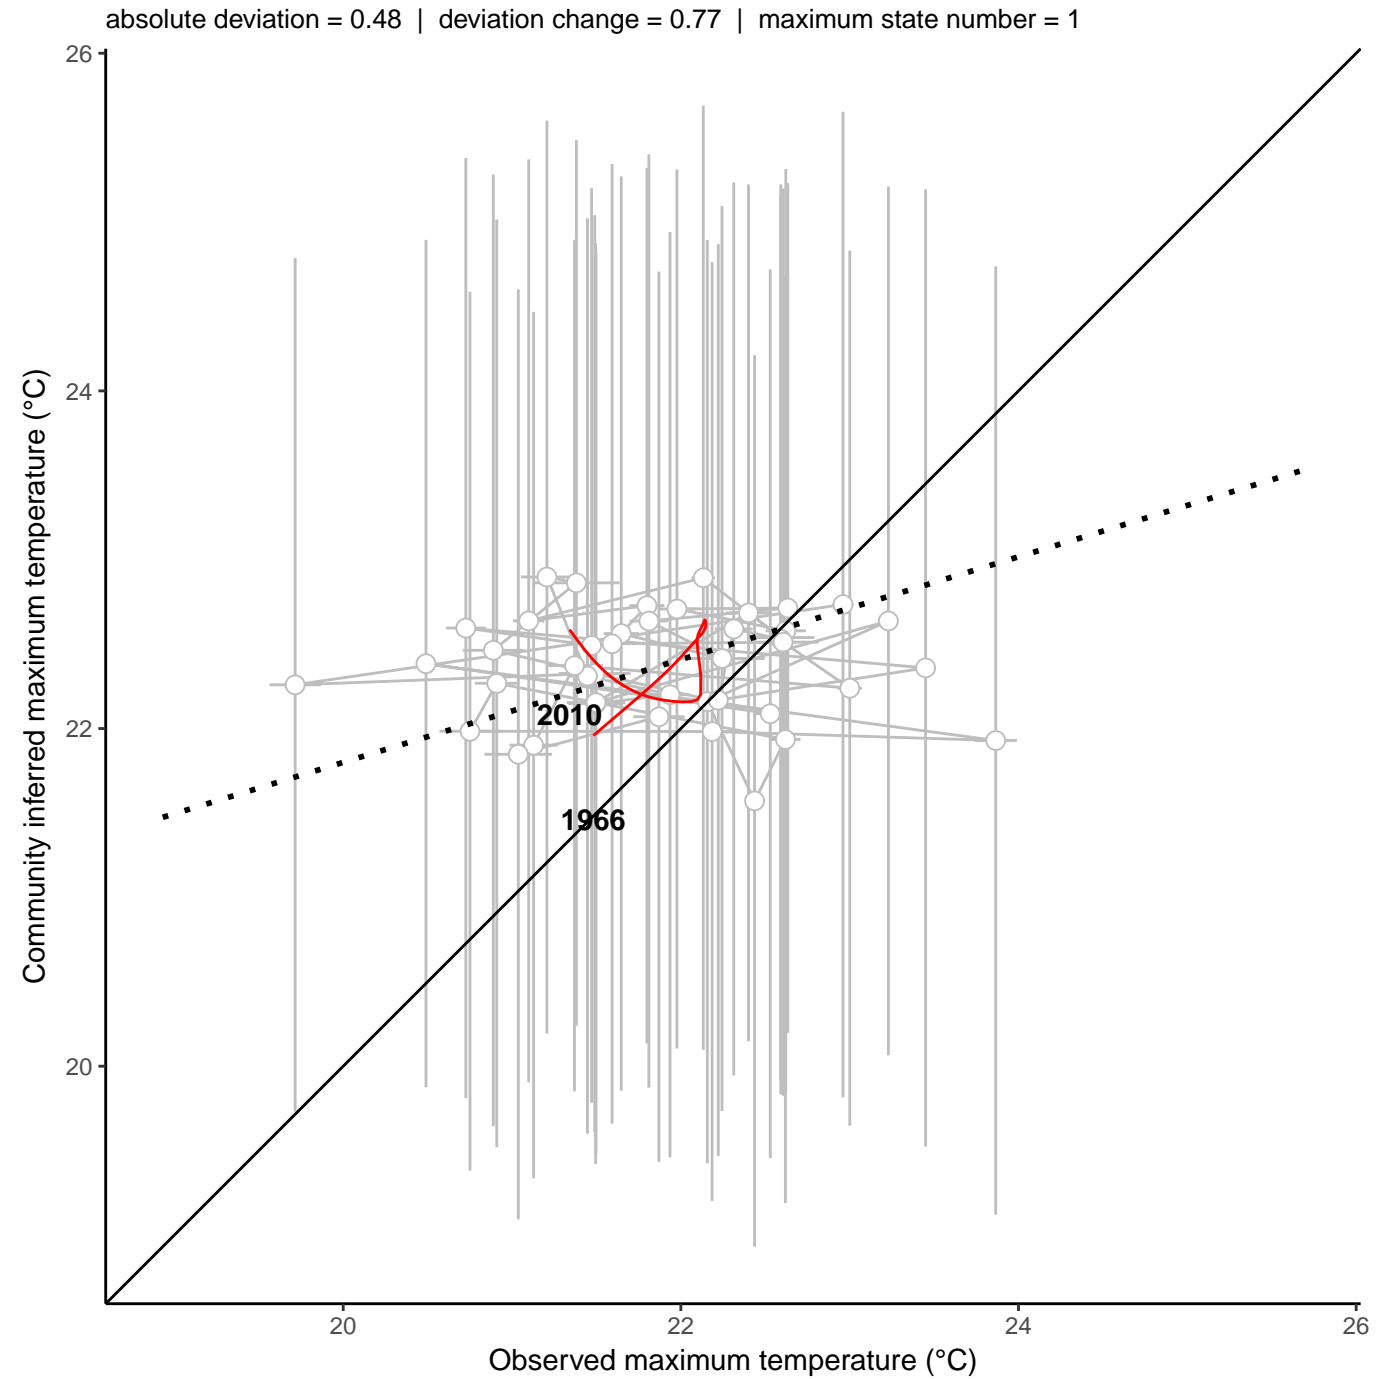



site : 840\_59\_18

absolute deviation = 1.95 | deviation change = 0.2 | maximum state number = 1

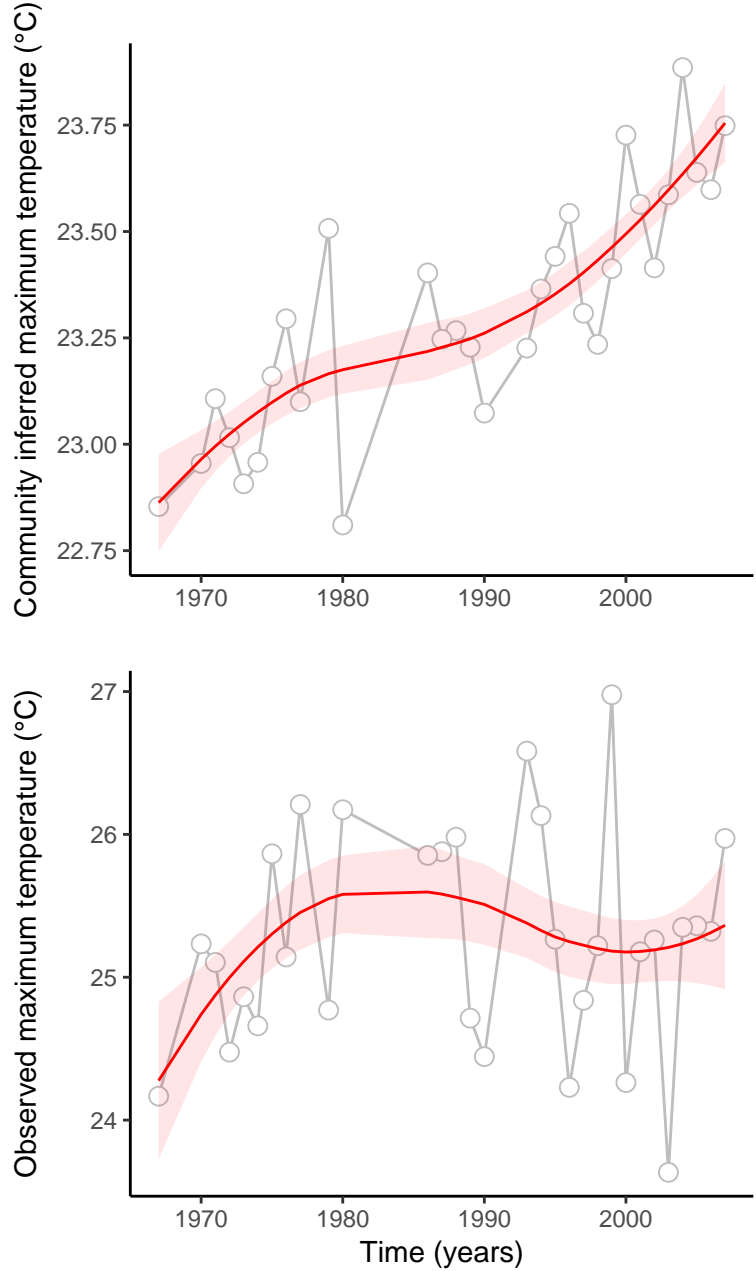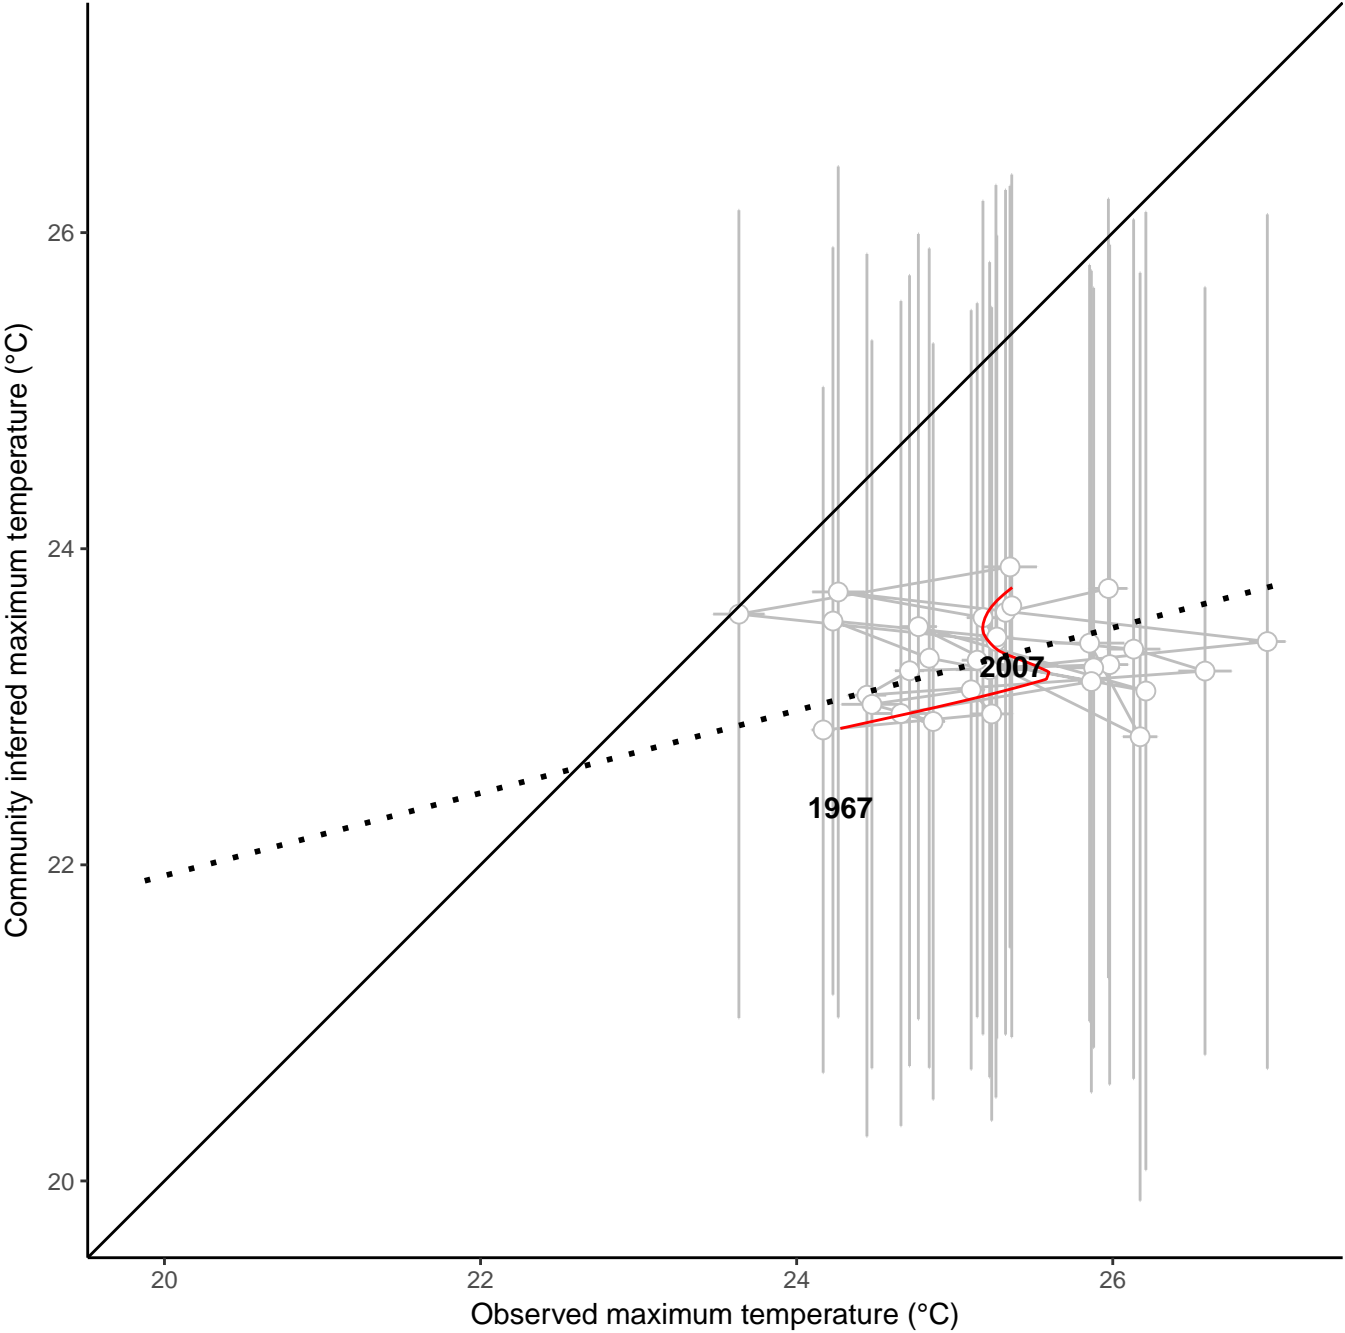

site : 840\_61\_51

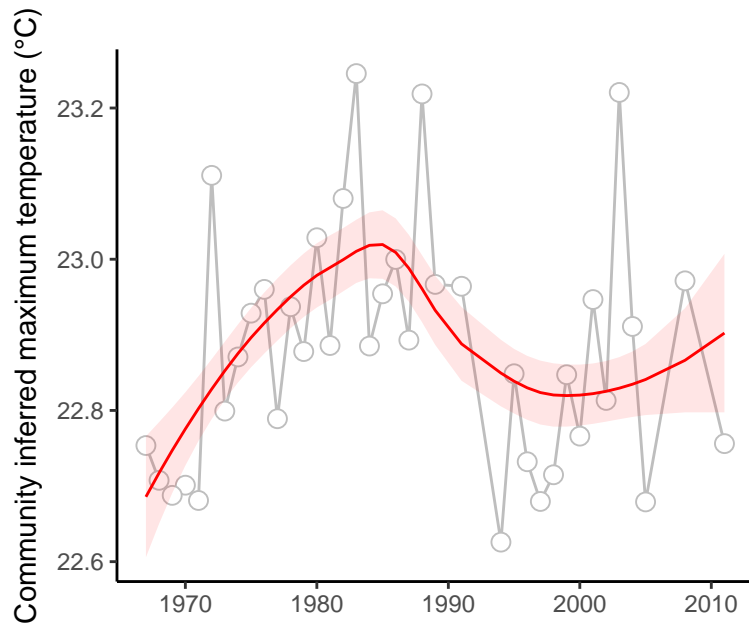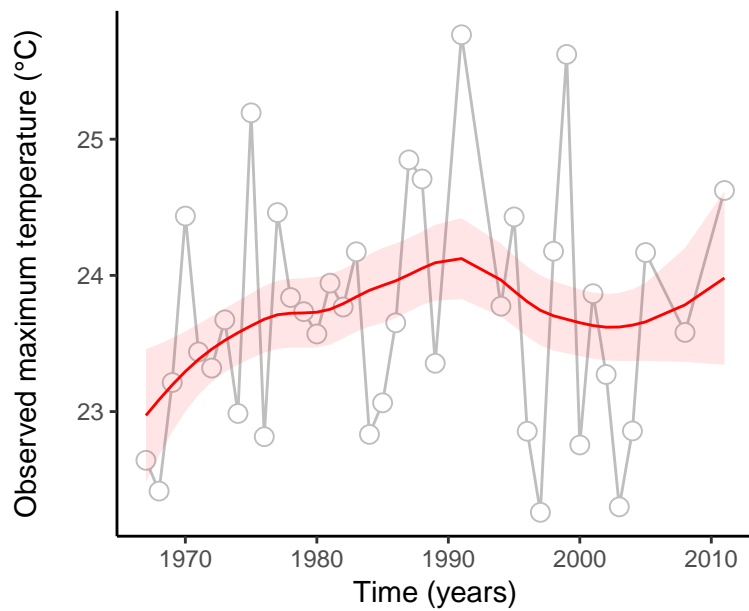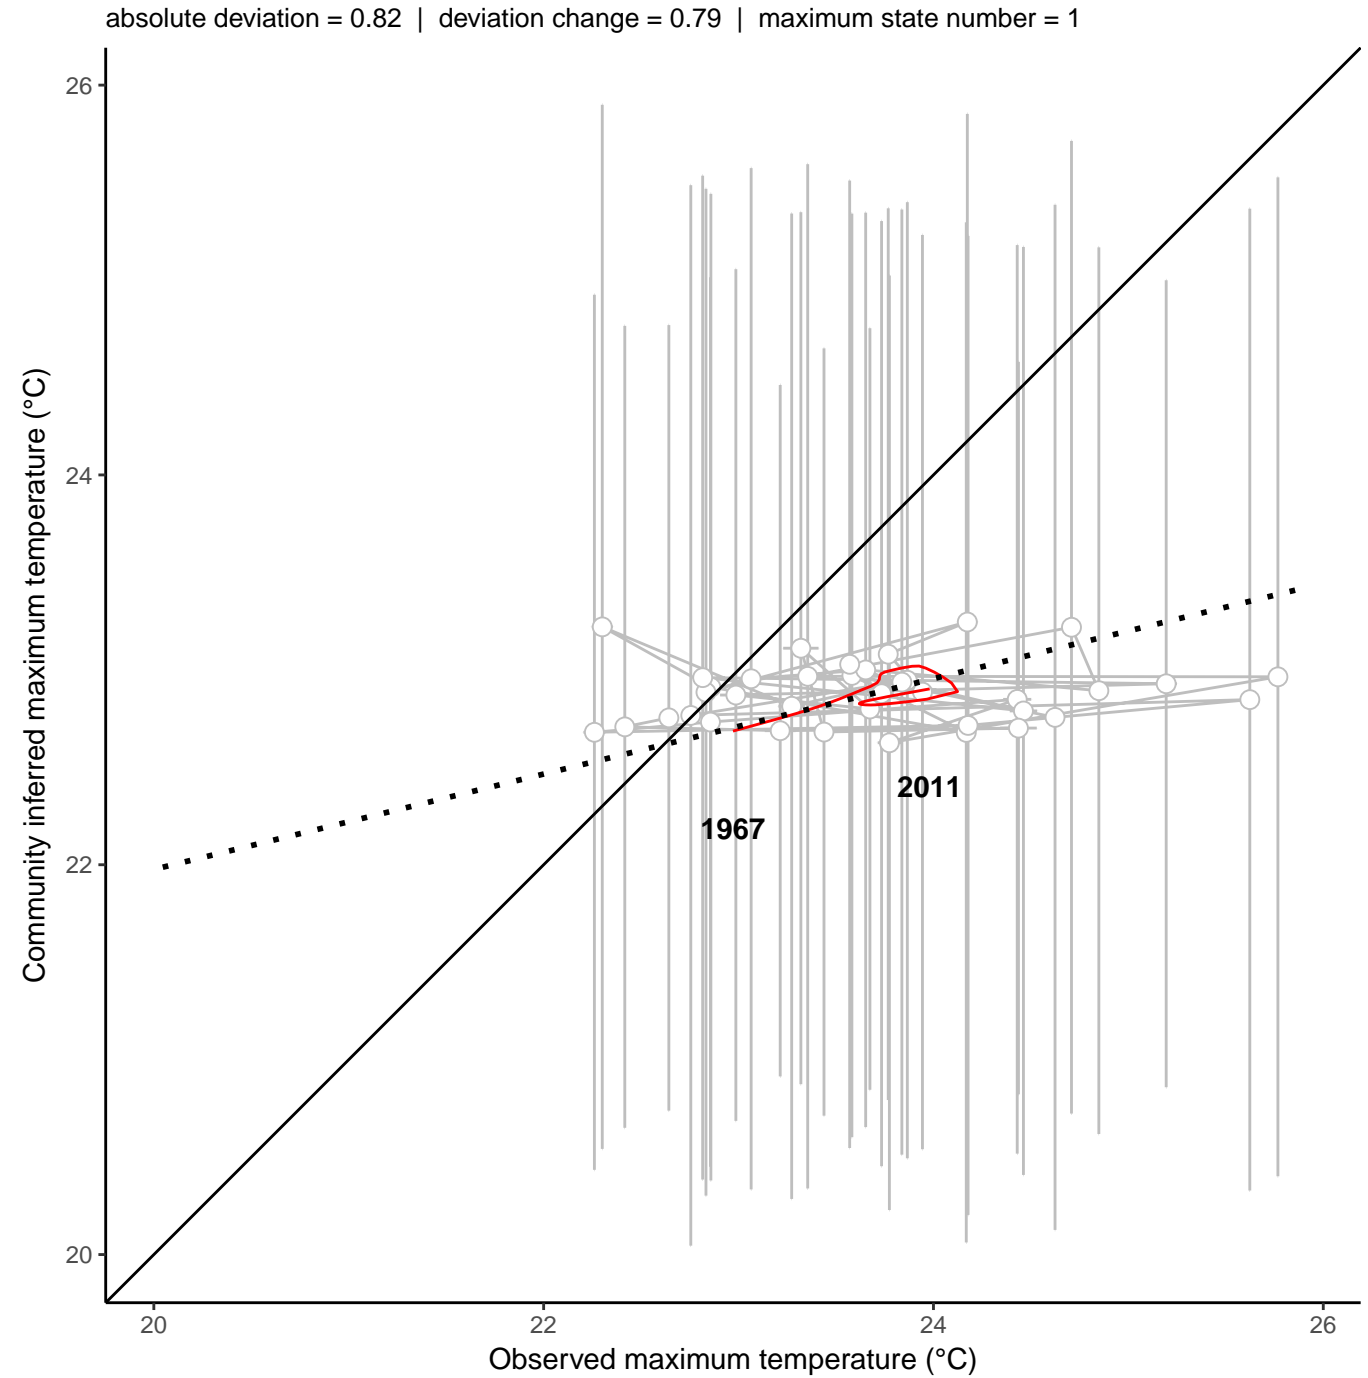

site : 840\_61\_60

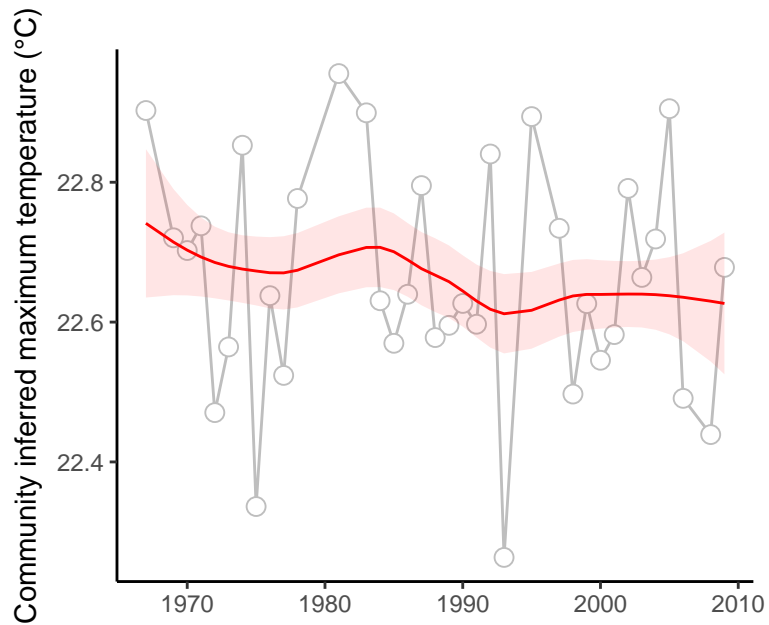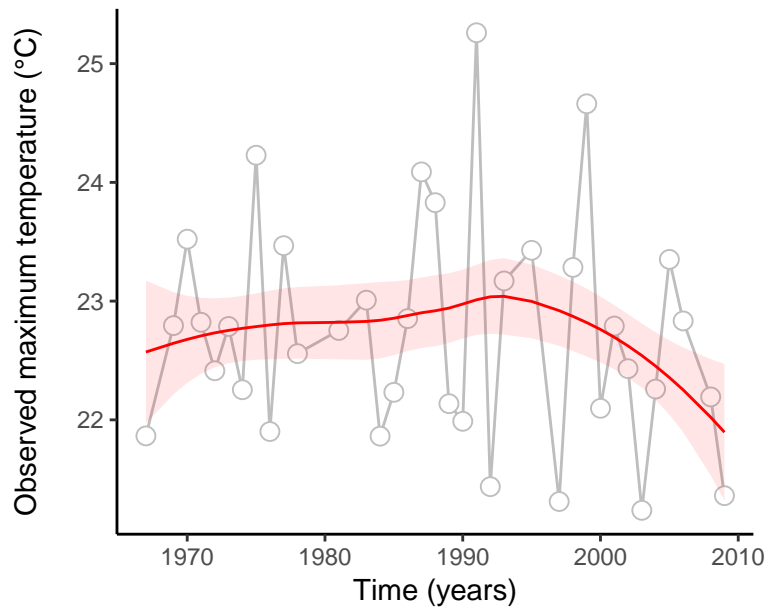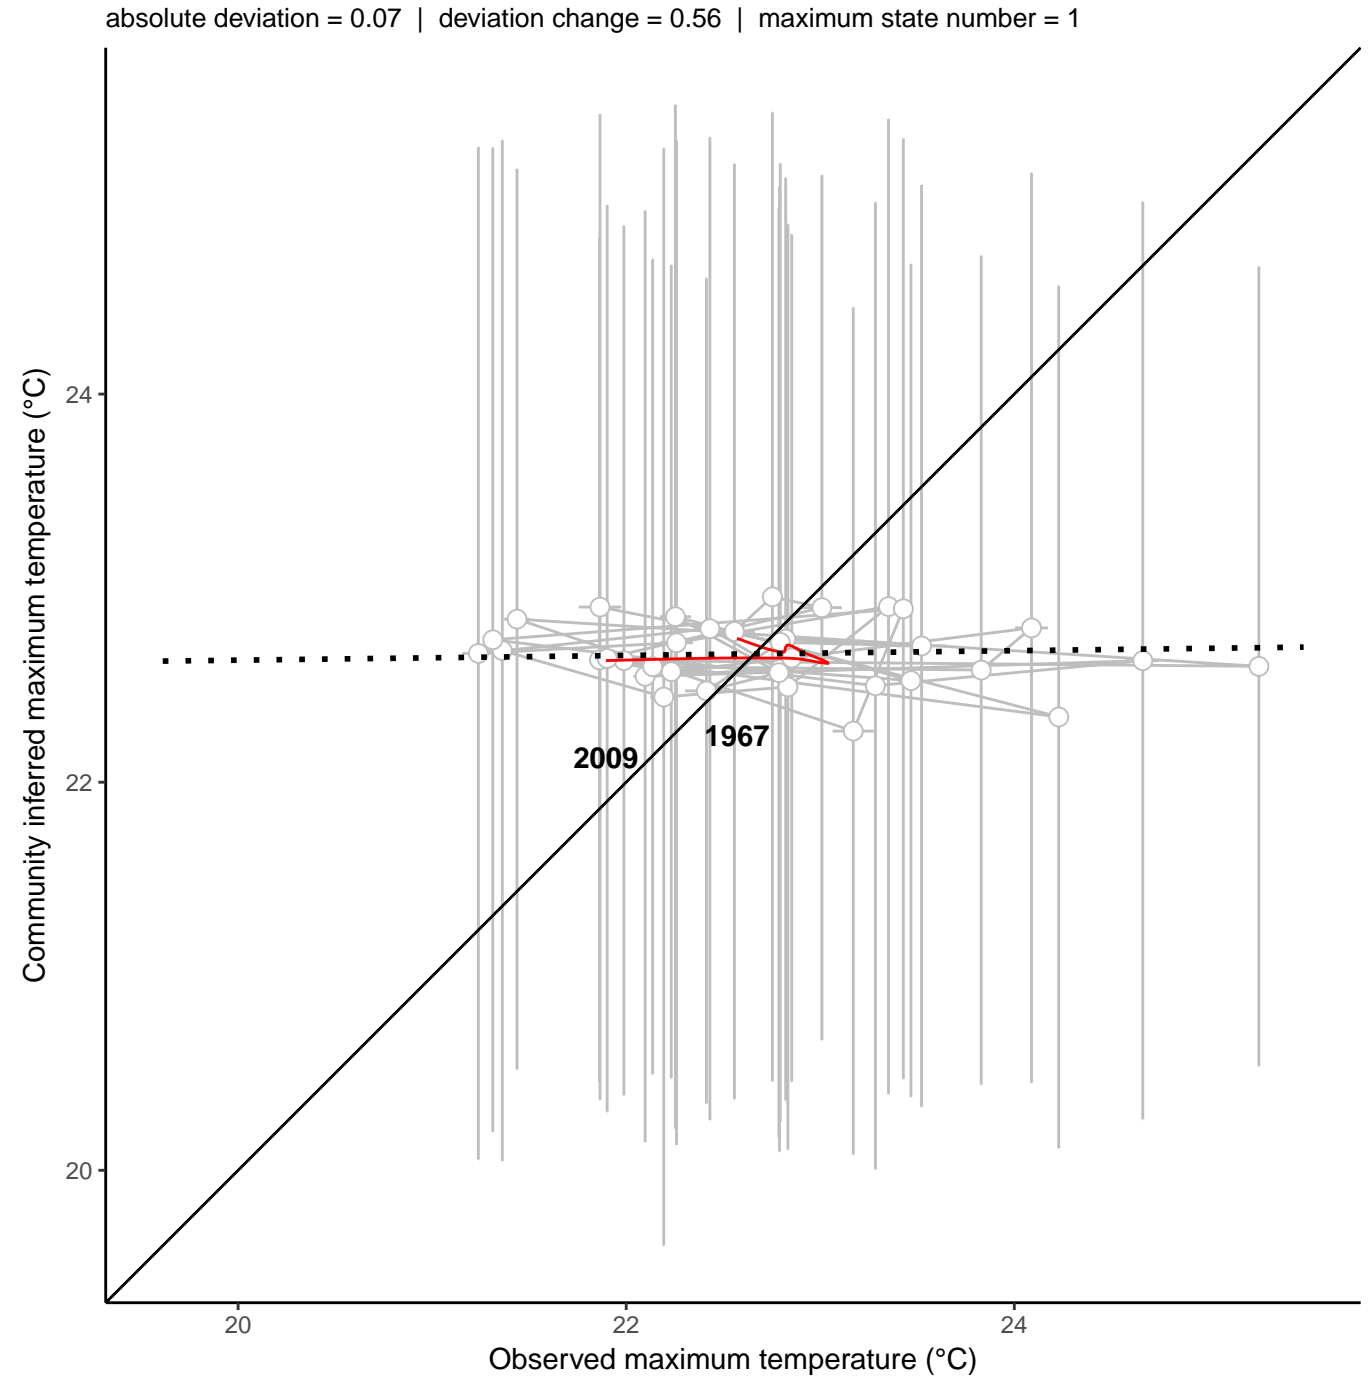

site : 840\_64\_2

absolute deviation = 1.88 | deviation change = 1.14 | maximum state number = 2

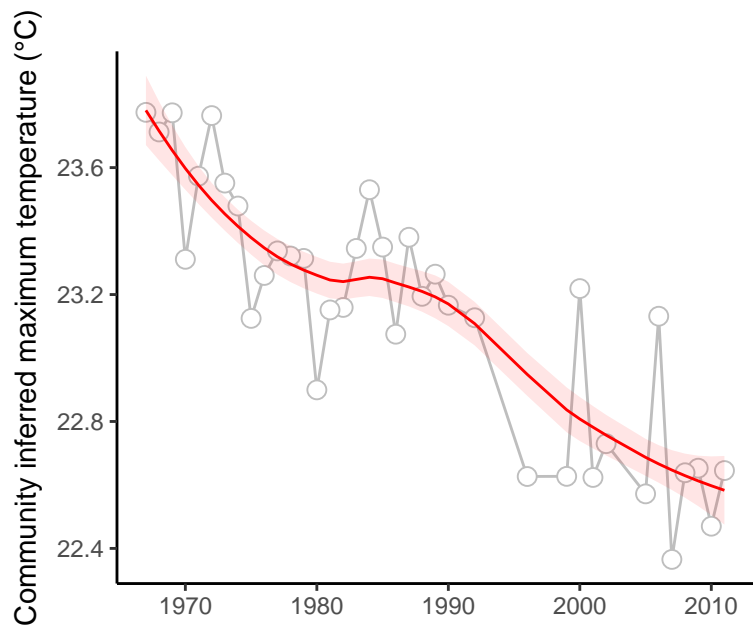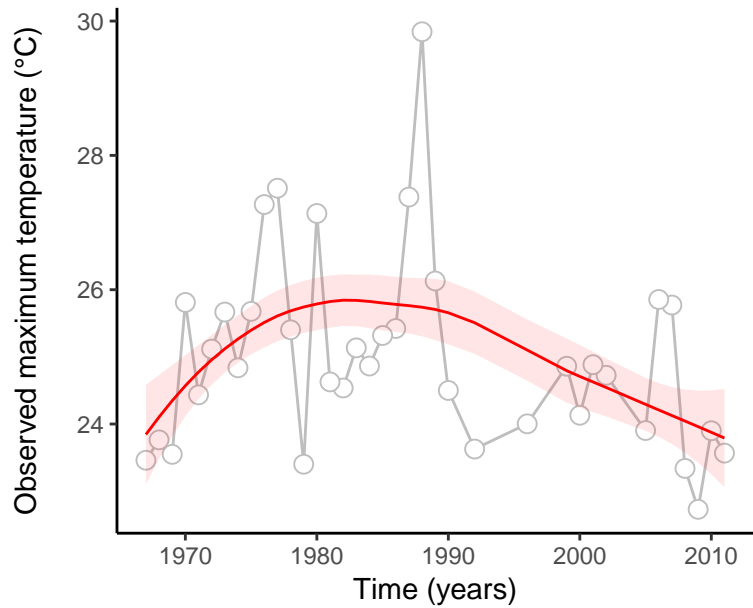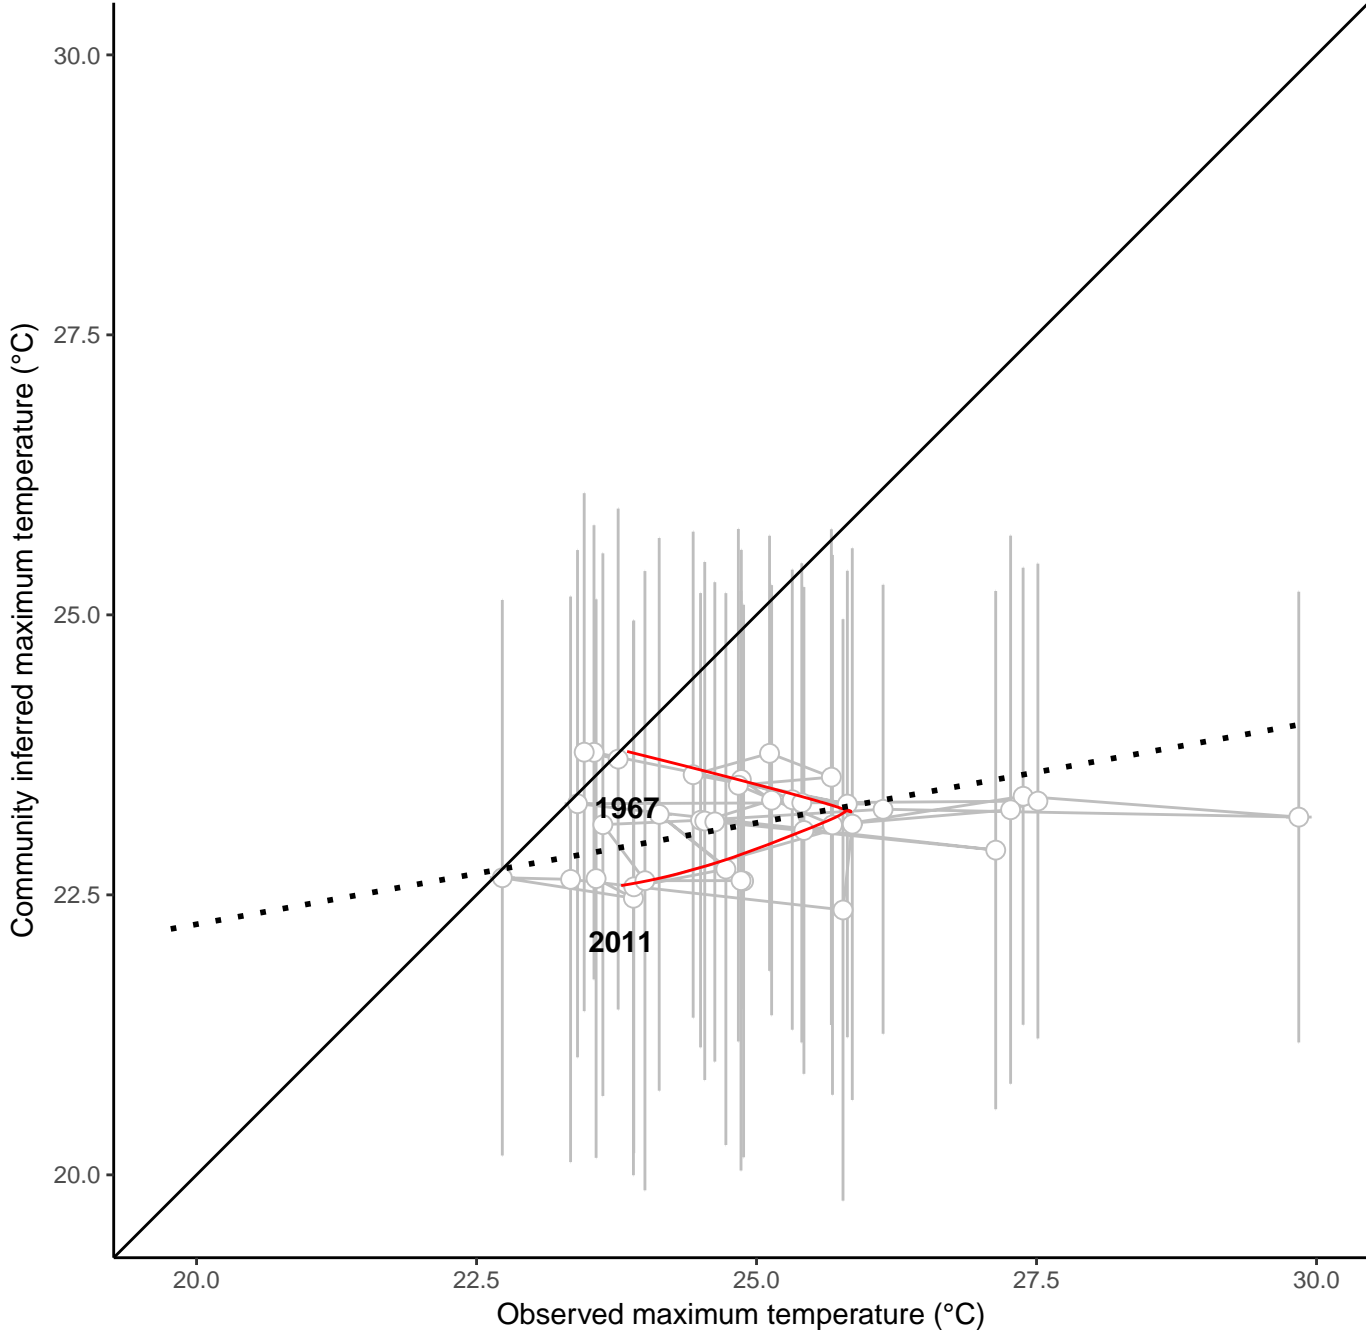

site : 840\_64\_5

absolute deviation = 0.67 | deviation change = -0.36 | maximum state number = 1

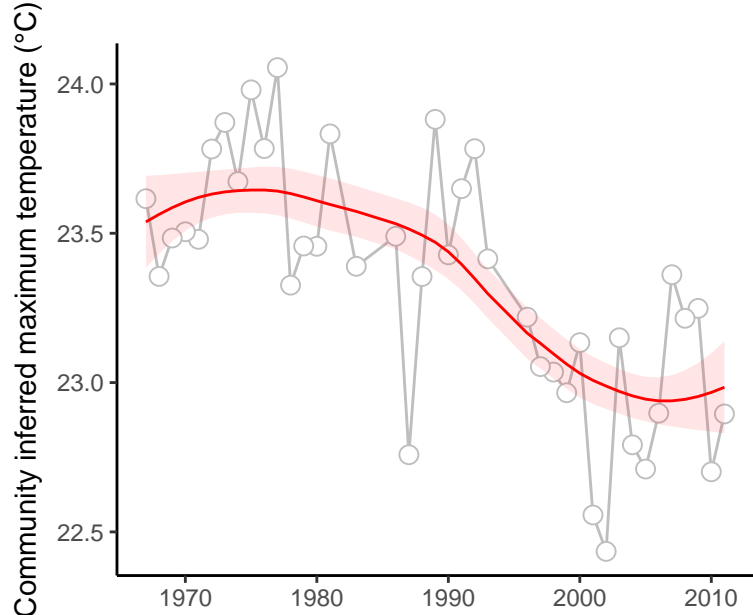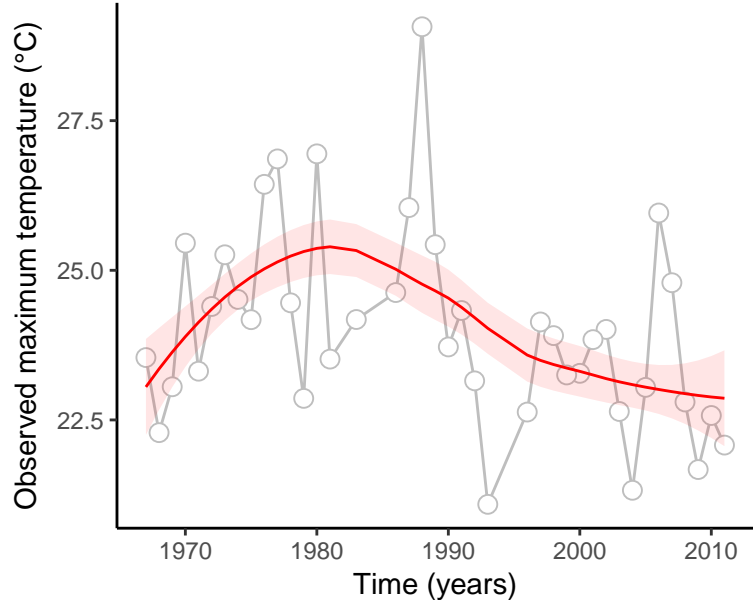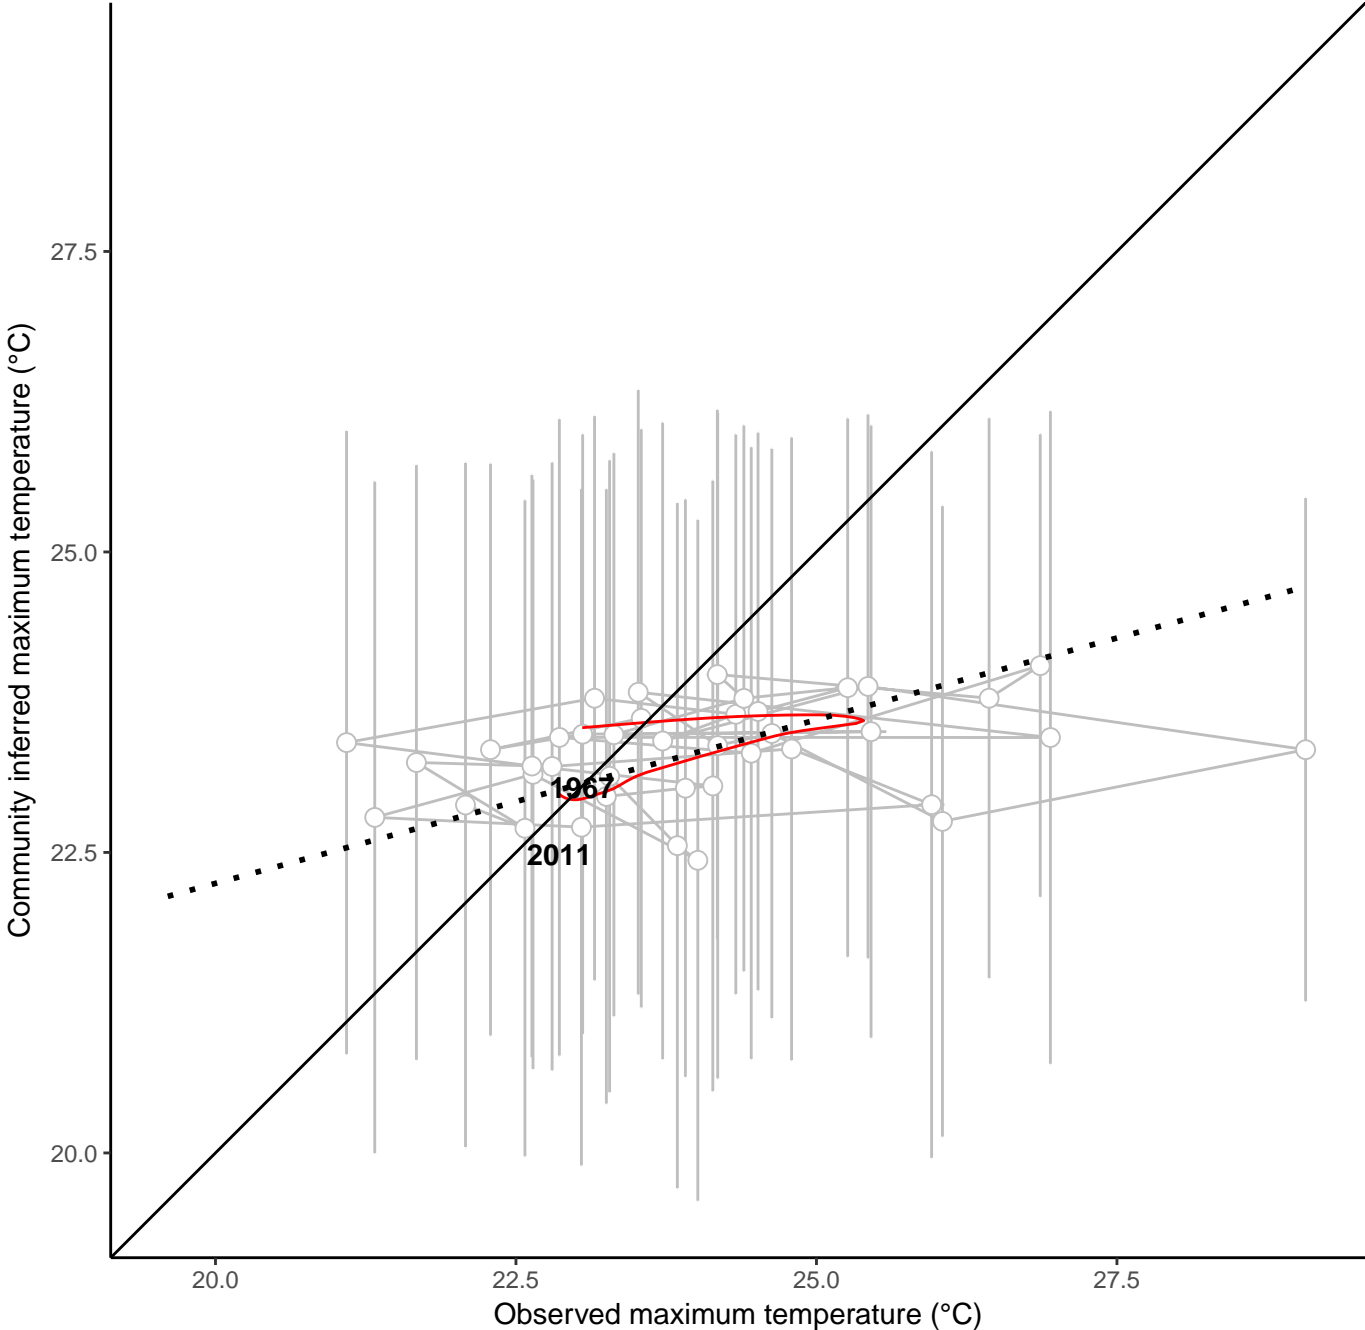

site : 840\_67\_18

absolute deviation = 4.3 | deviation change = 0.52 | maximum state number = 1

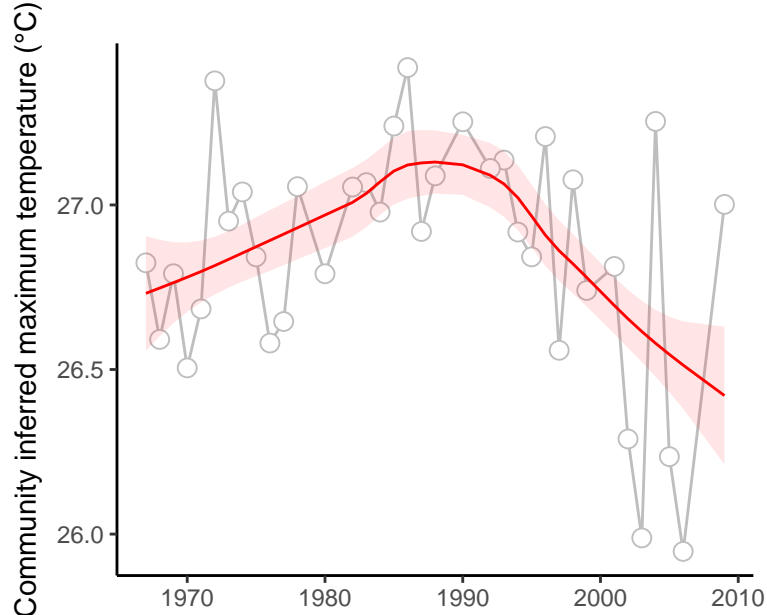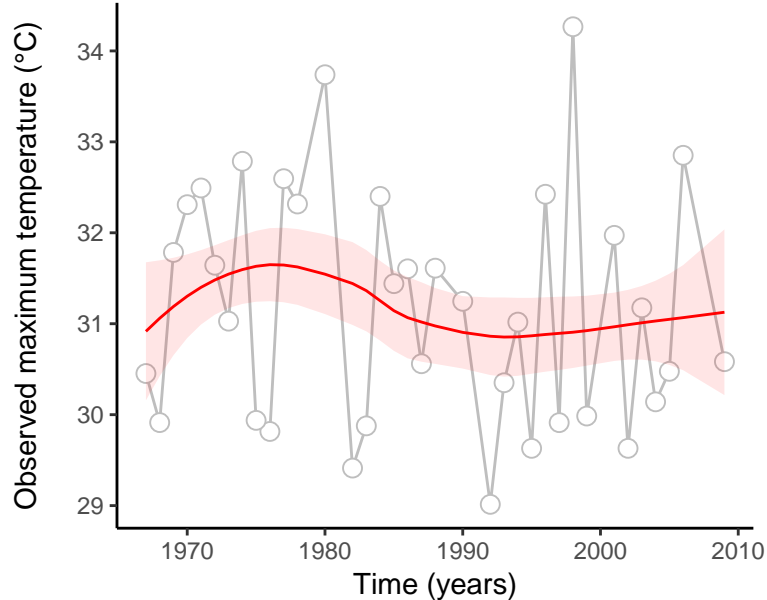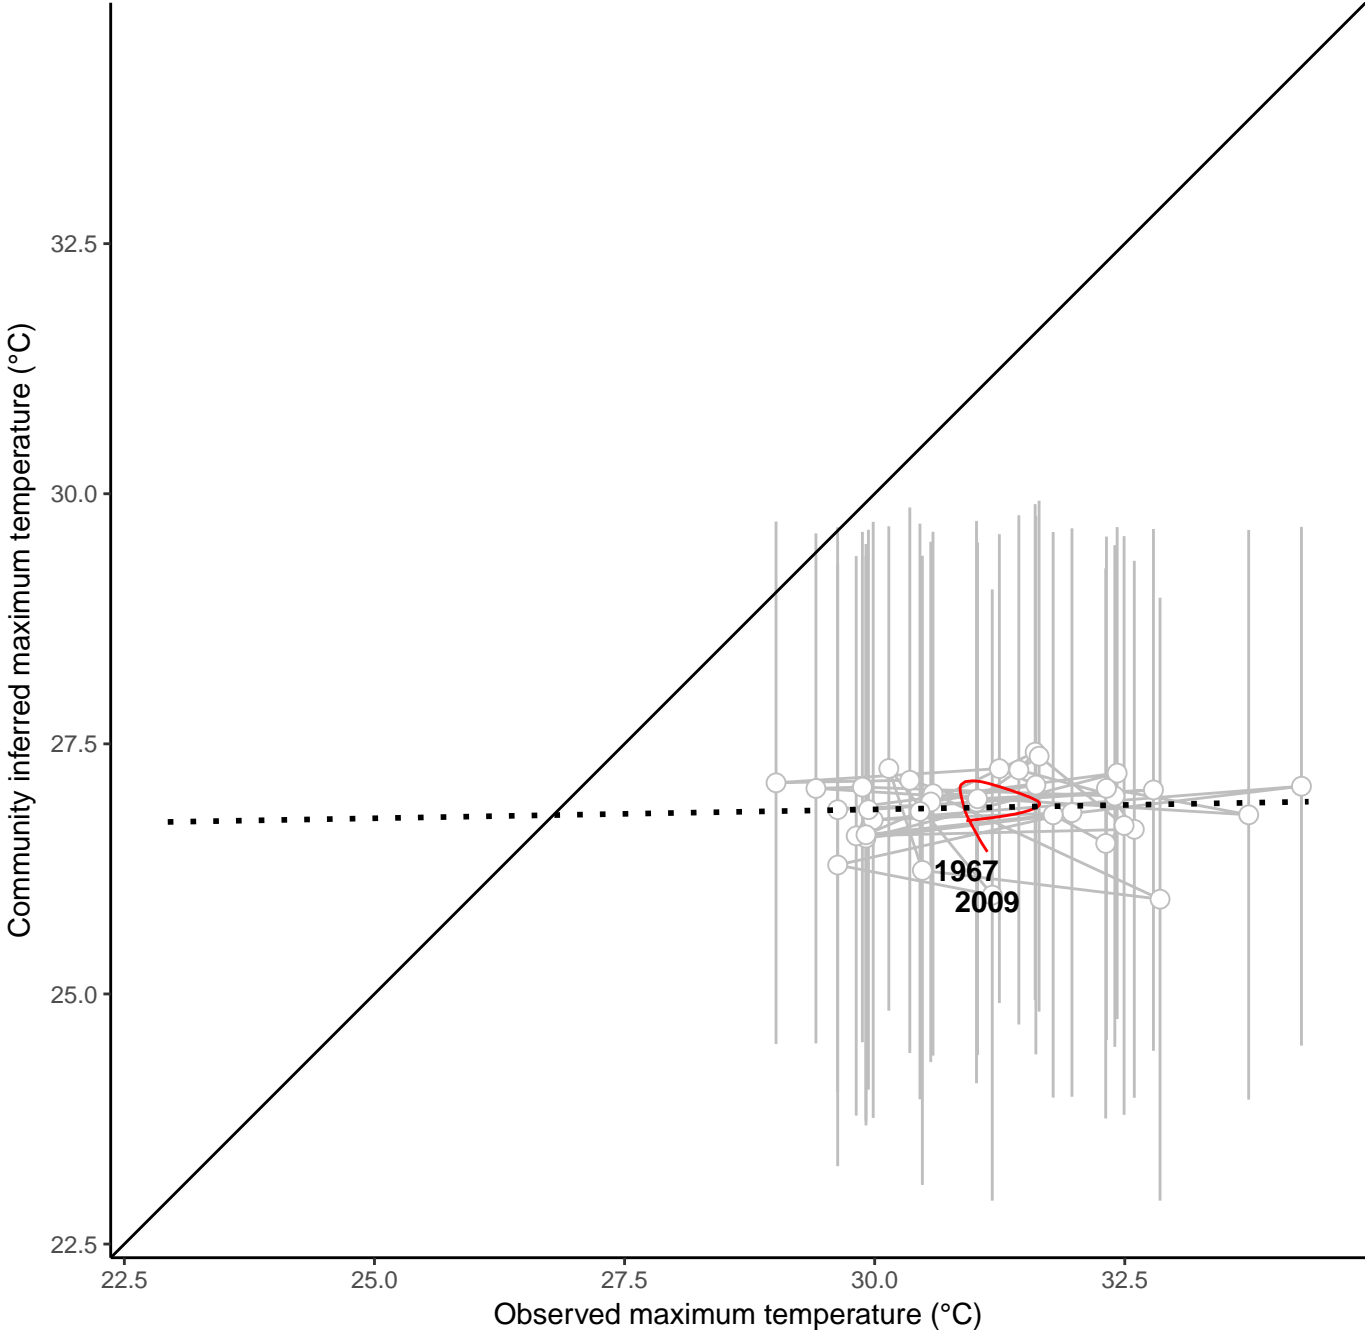

site : 840\_67\_22

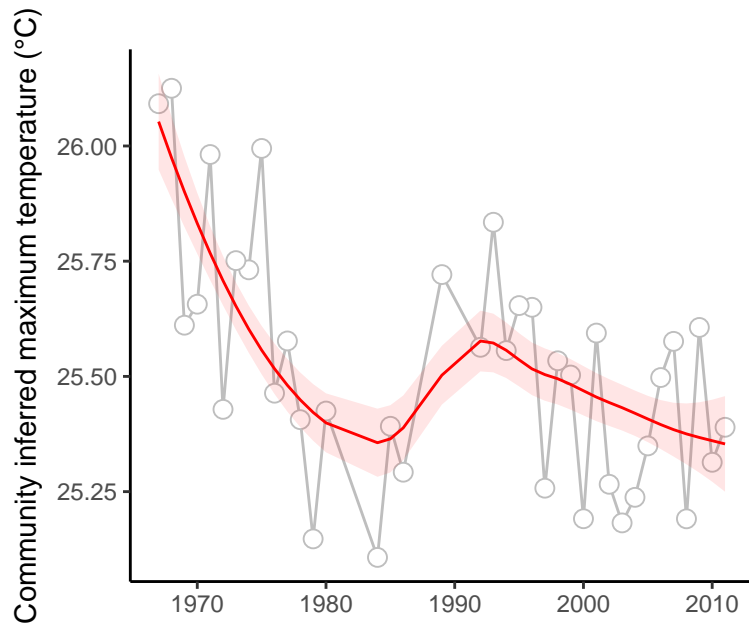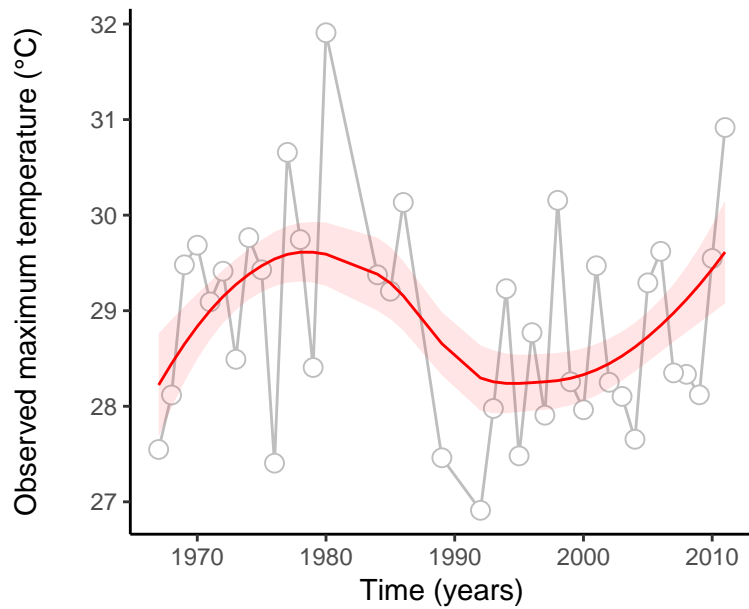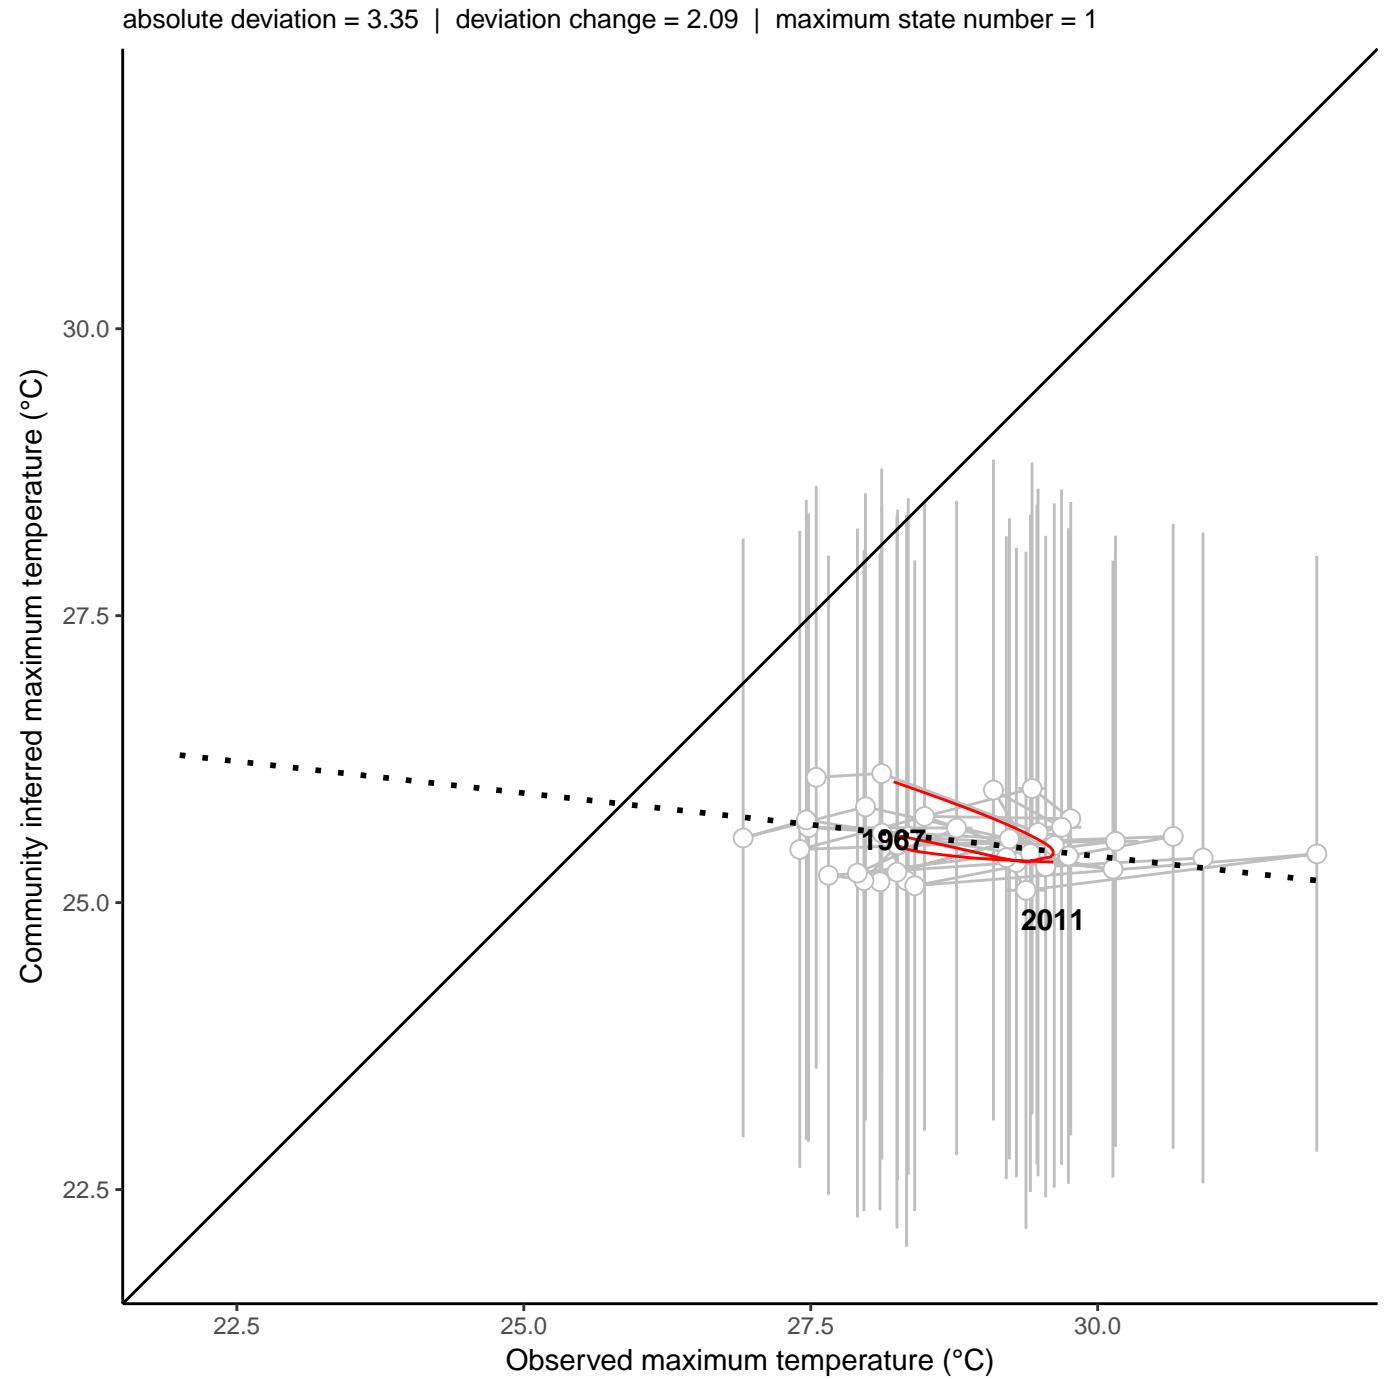

site : 840\_67\_31

absolute deviation = 6.03 | deviation change = 0.1 | maximum state number = 1

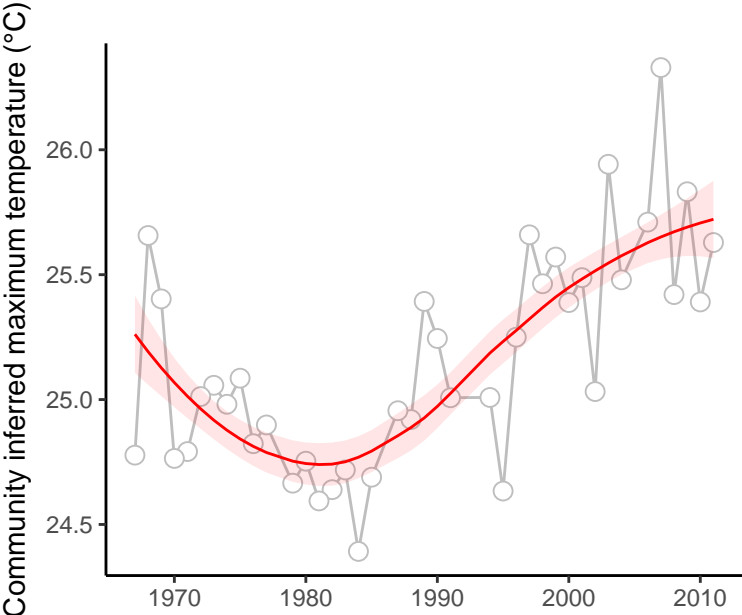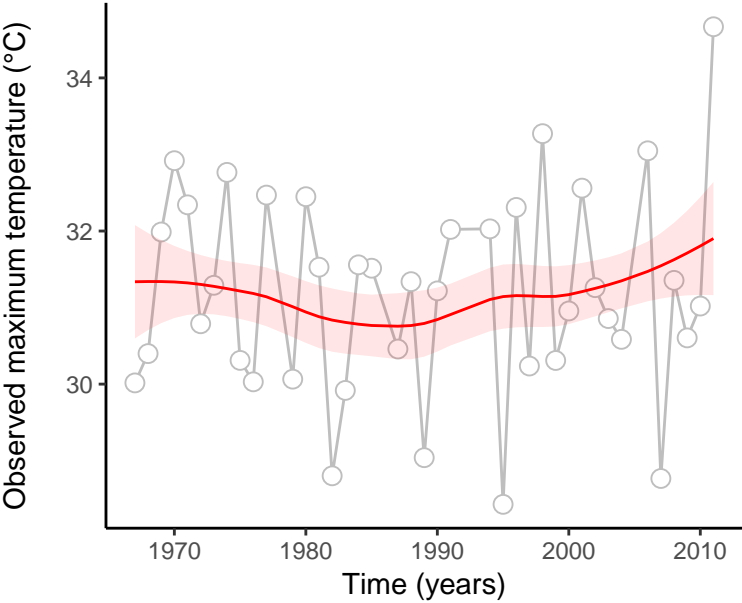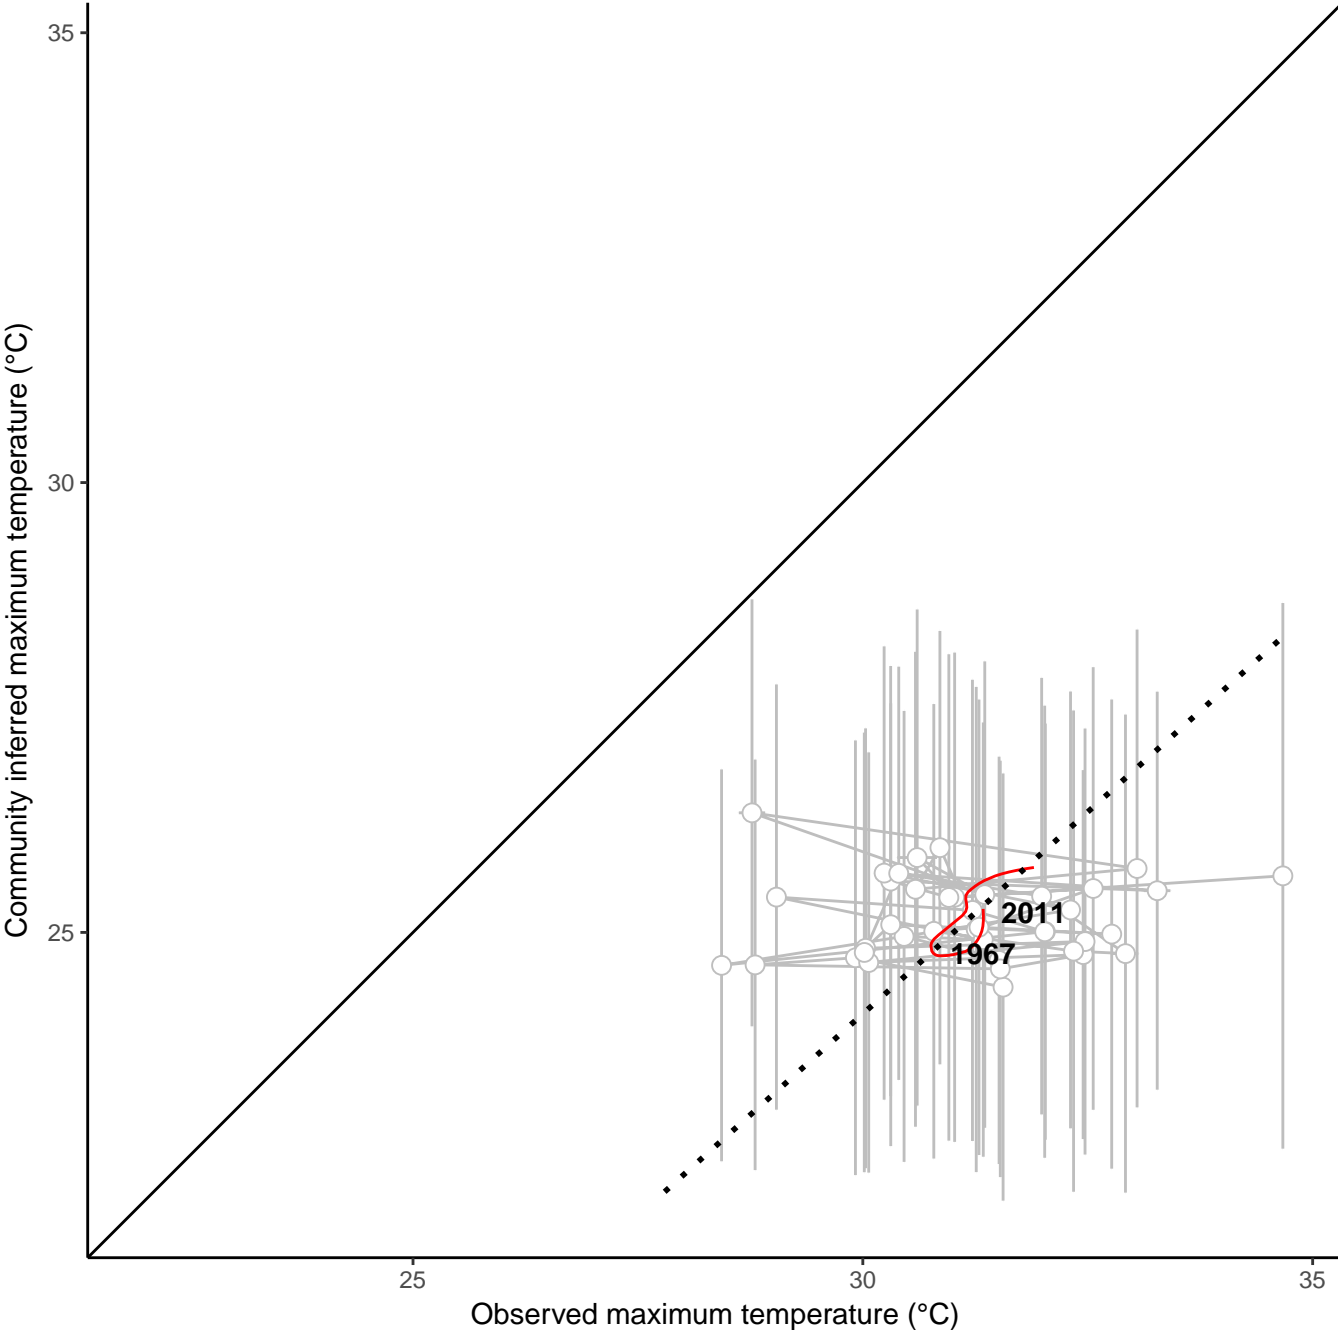



site : 840\_67\_32

absolute deviation = 5.01 | deviation change = -0.29 | maximum state number = 1

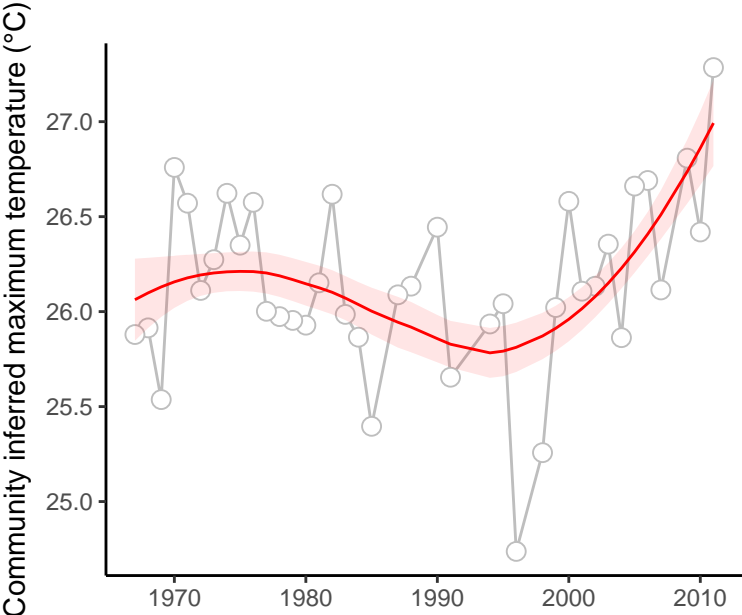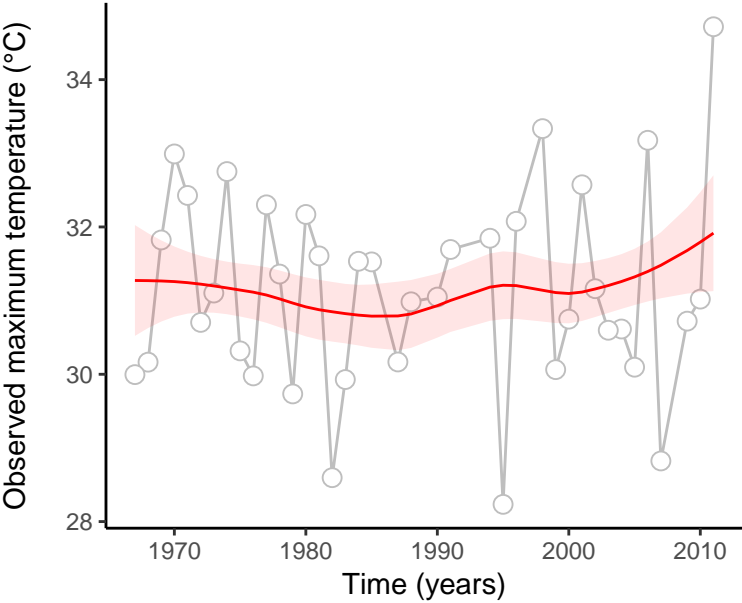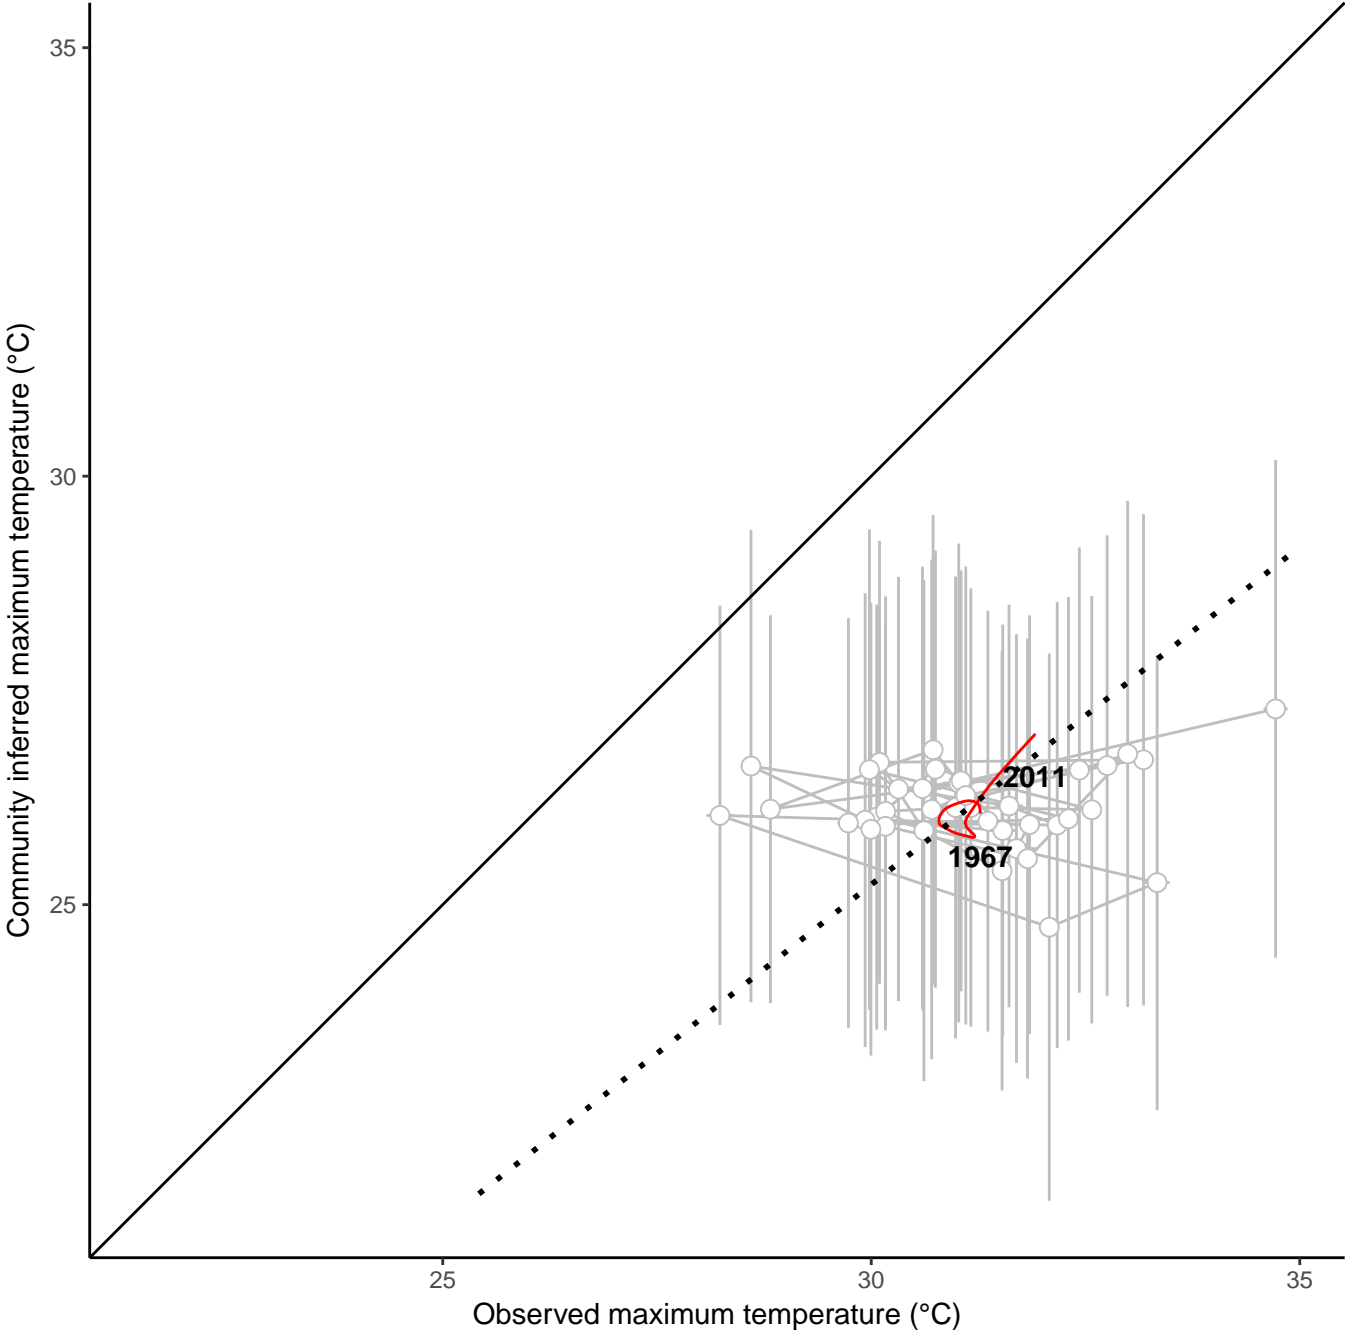

site : 840\_7\_13

absolute deviation = 4.01 | deviation change = 0.98 | maximum state number = 1

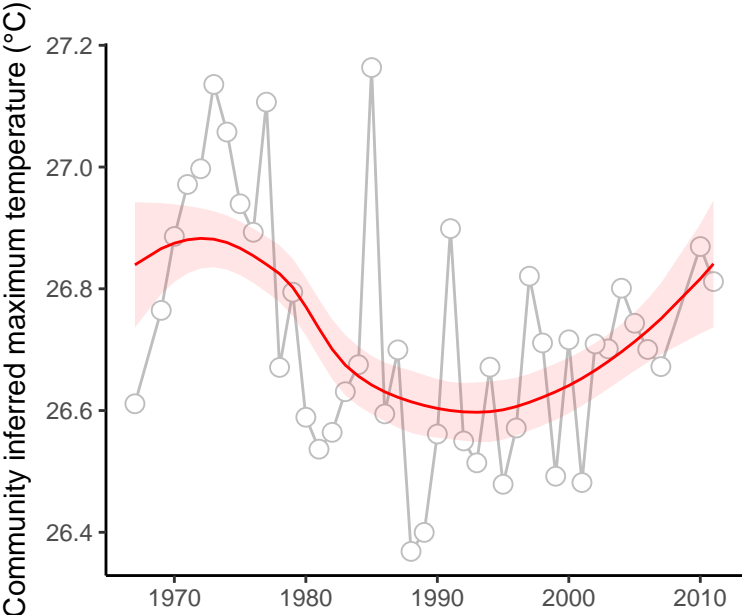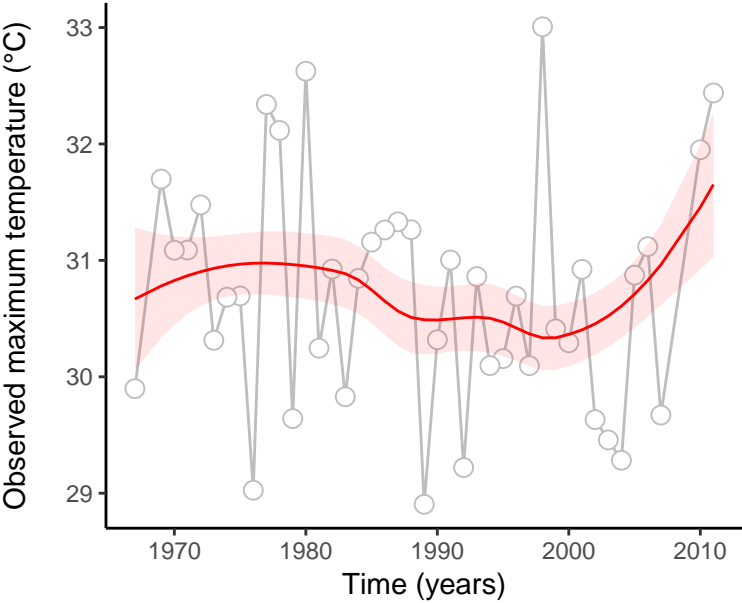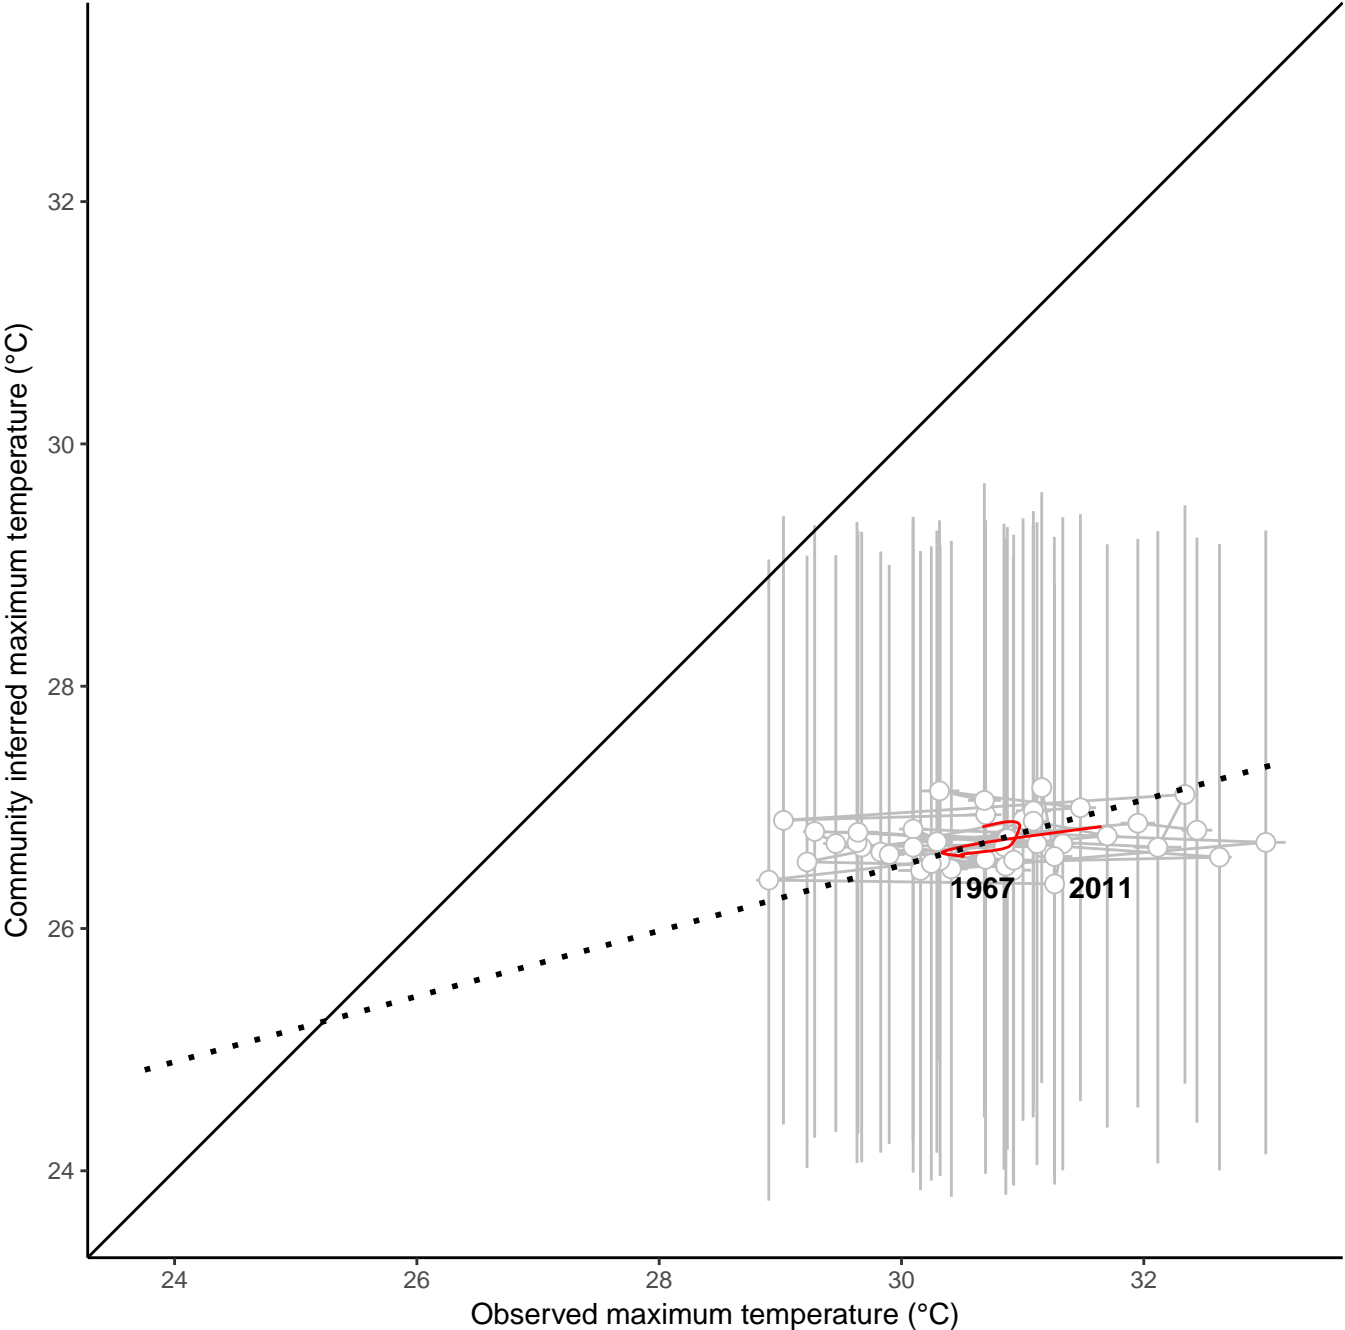

site : 840\_7\_26

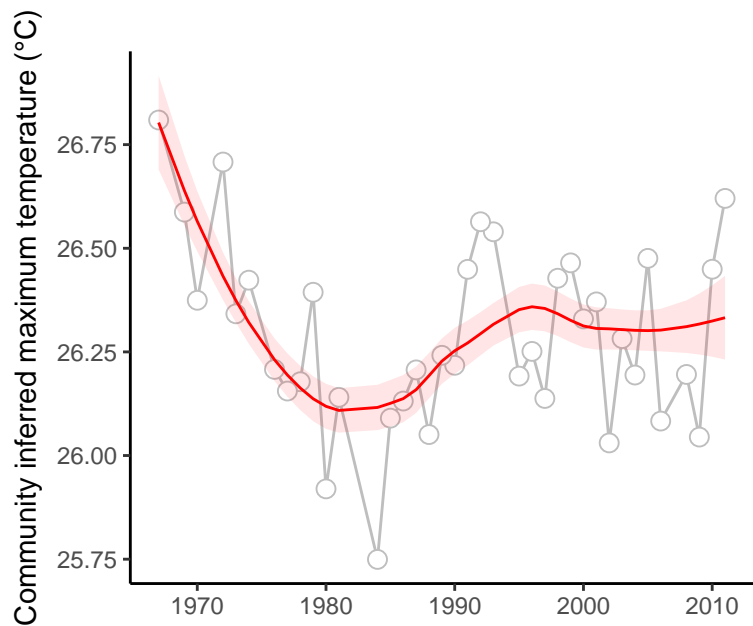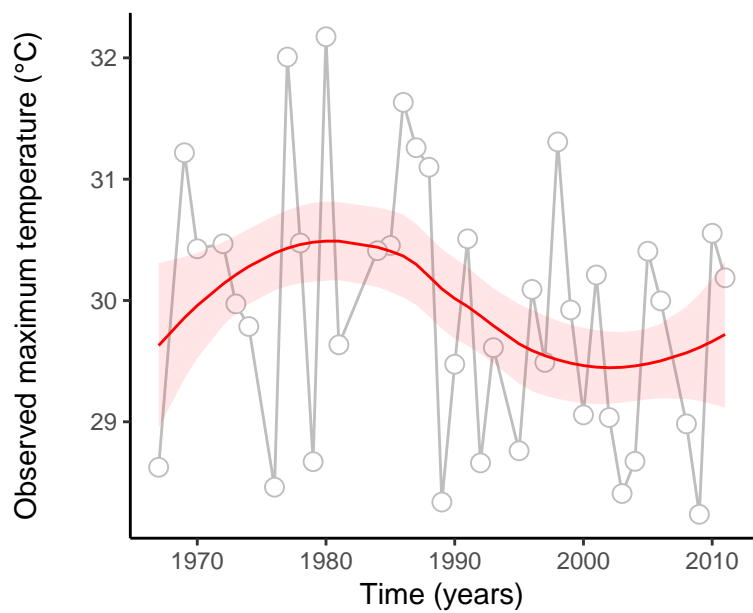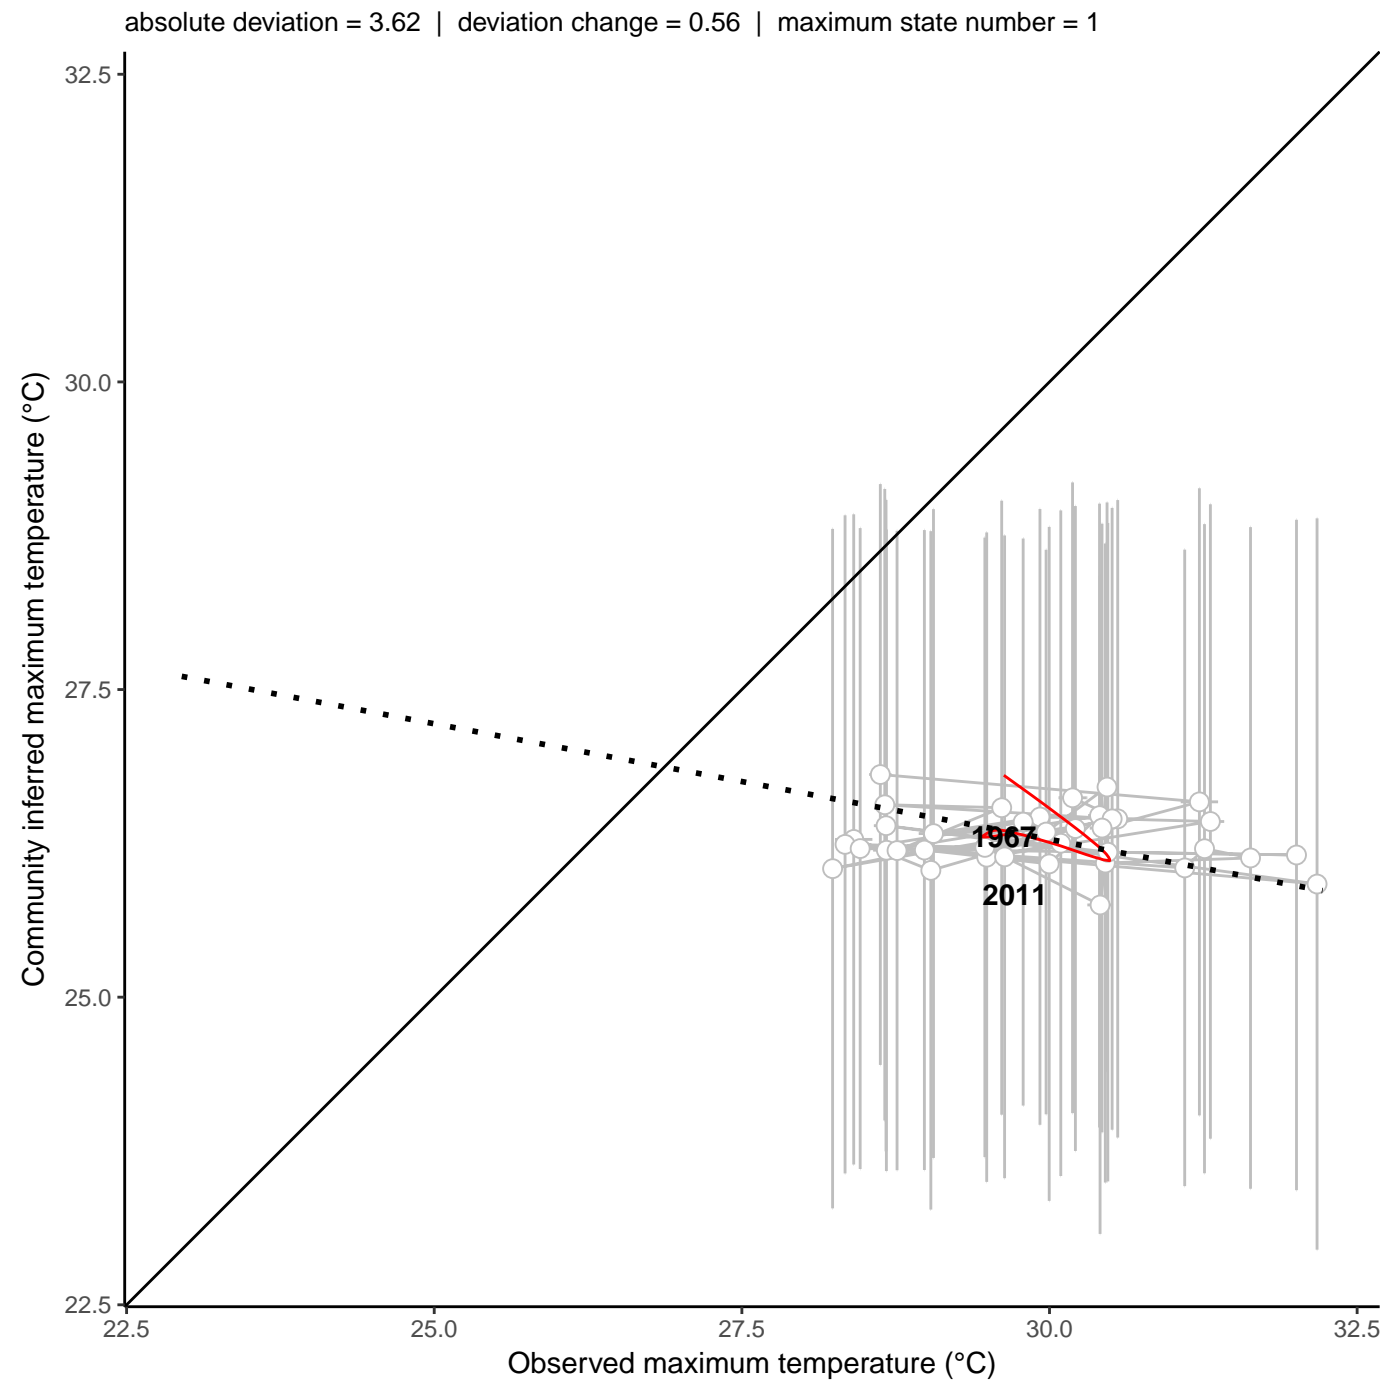

site : 840\_7\_28

absolute deviation = 2.31 | deviation change = 0.07 | maximum state number = 1

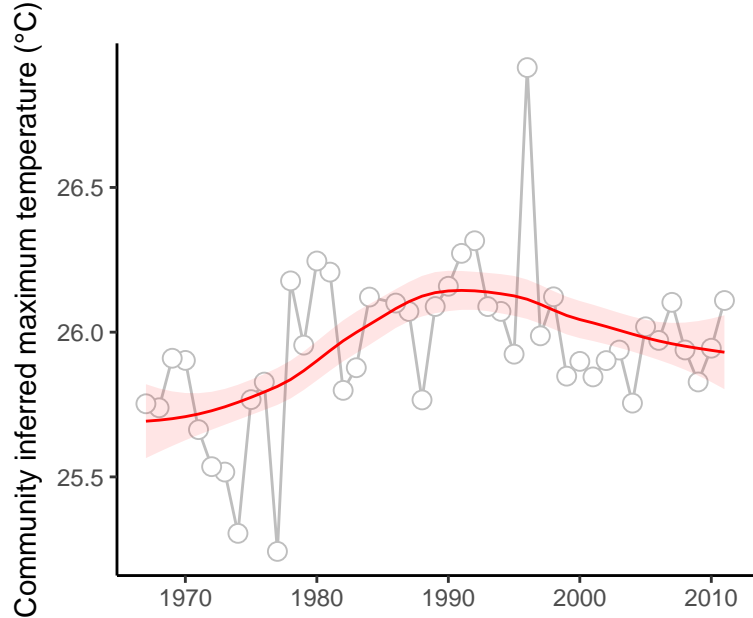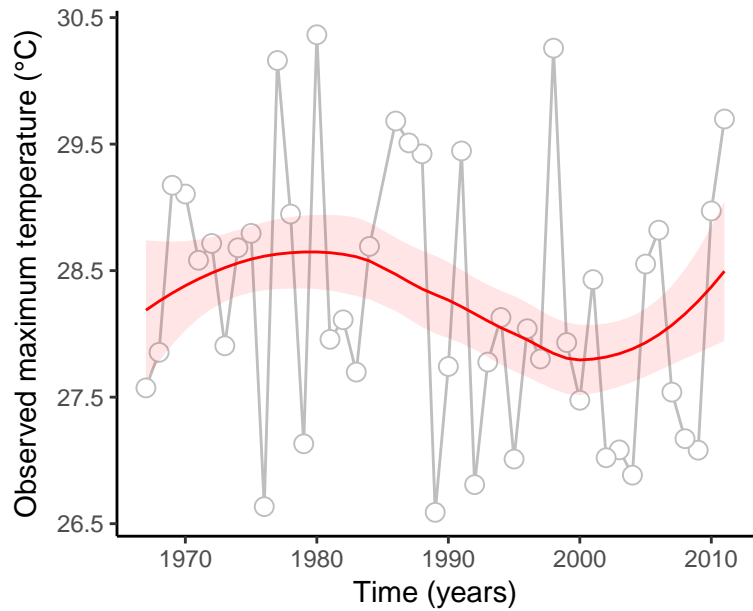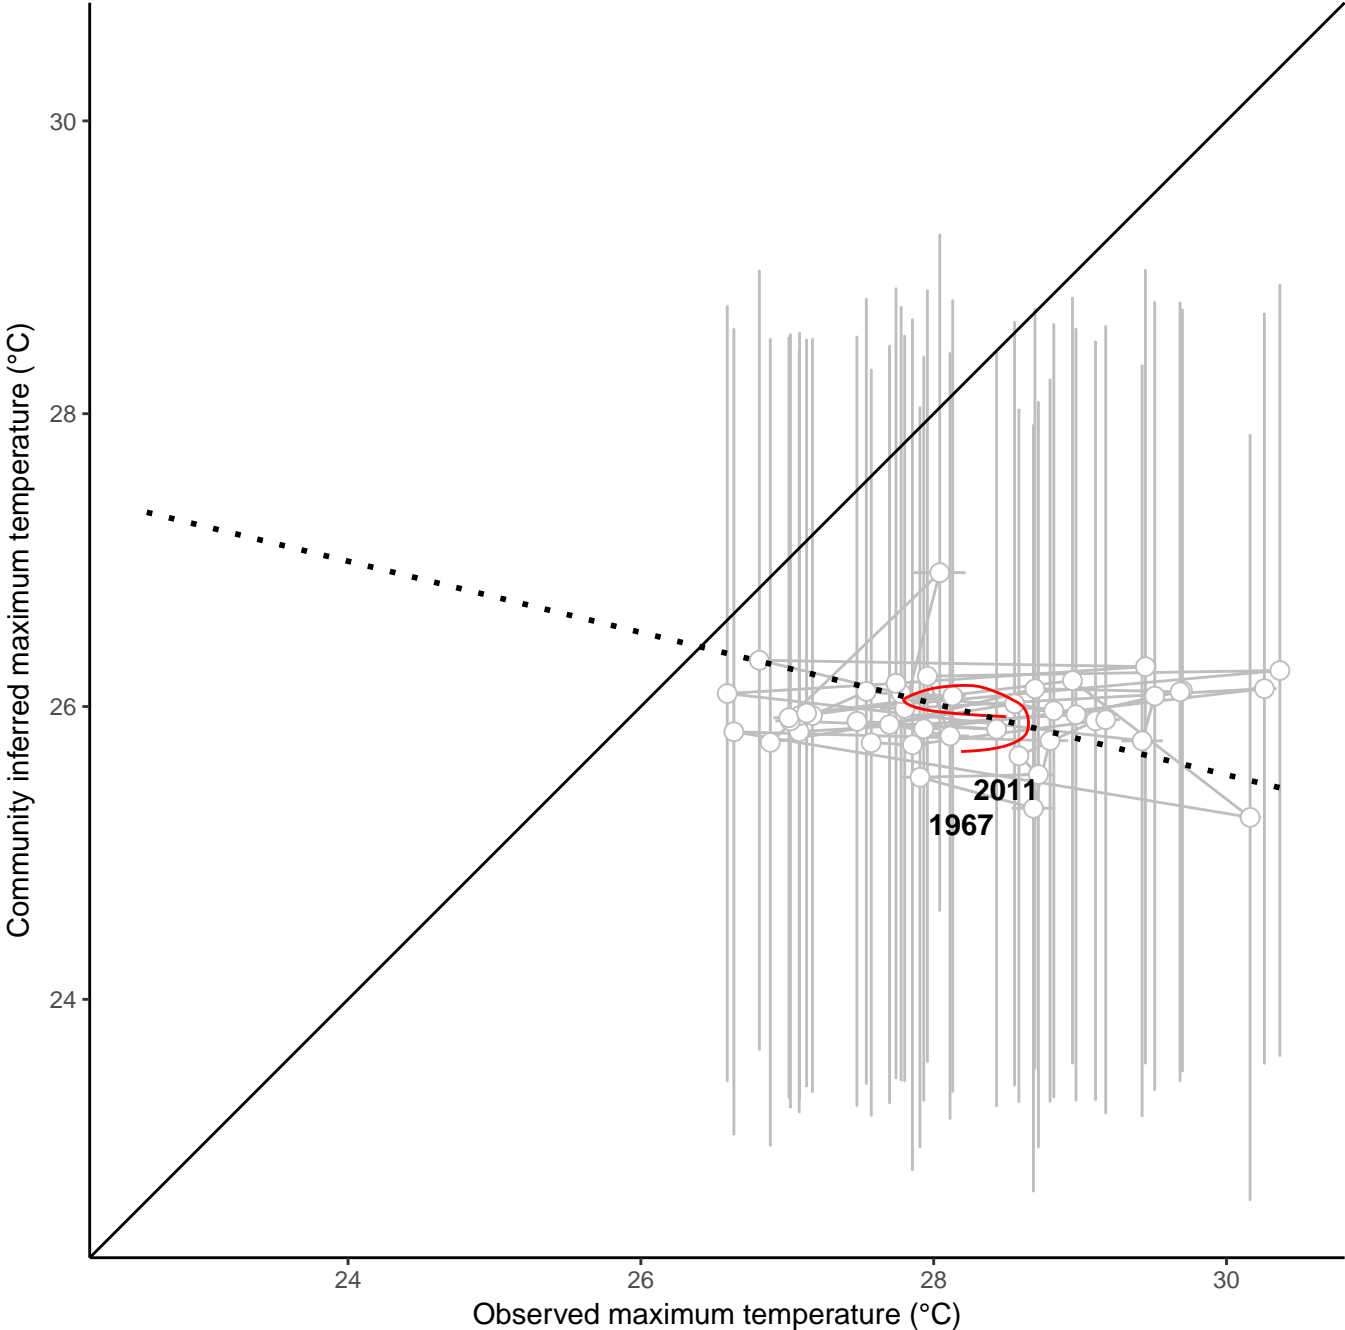

site : 840\_7\_8

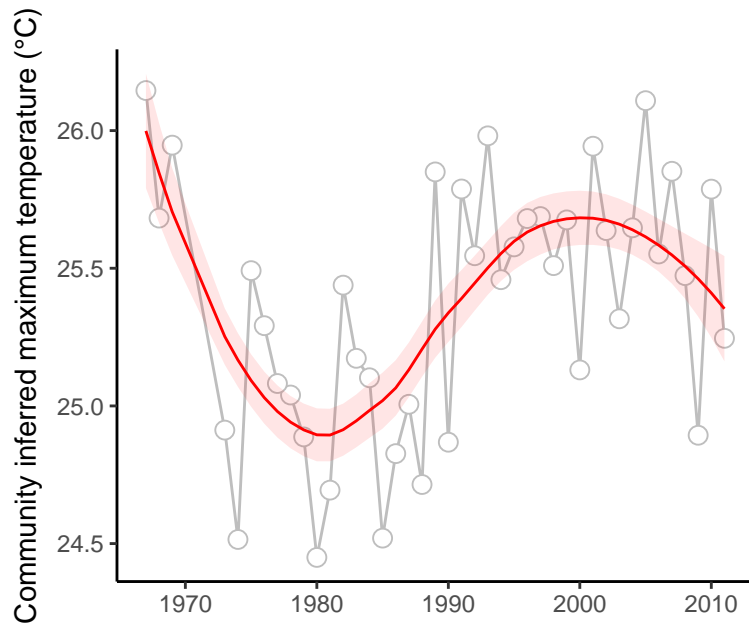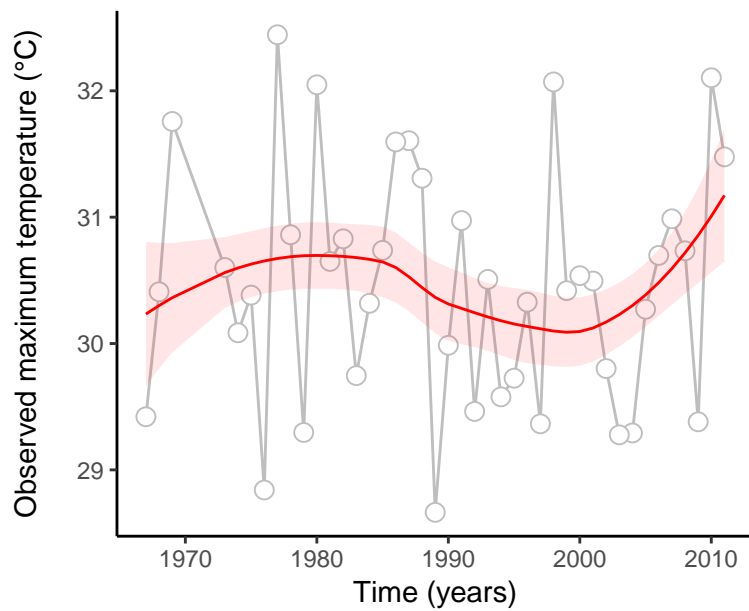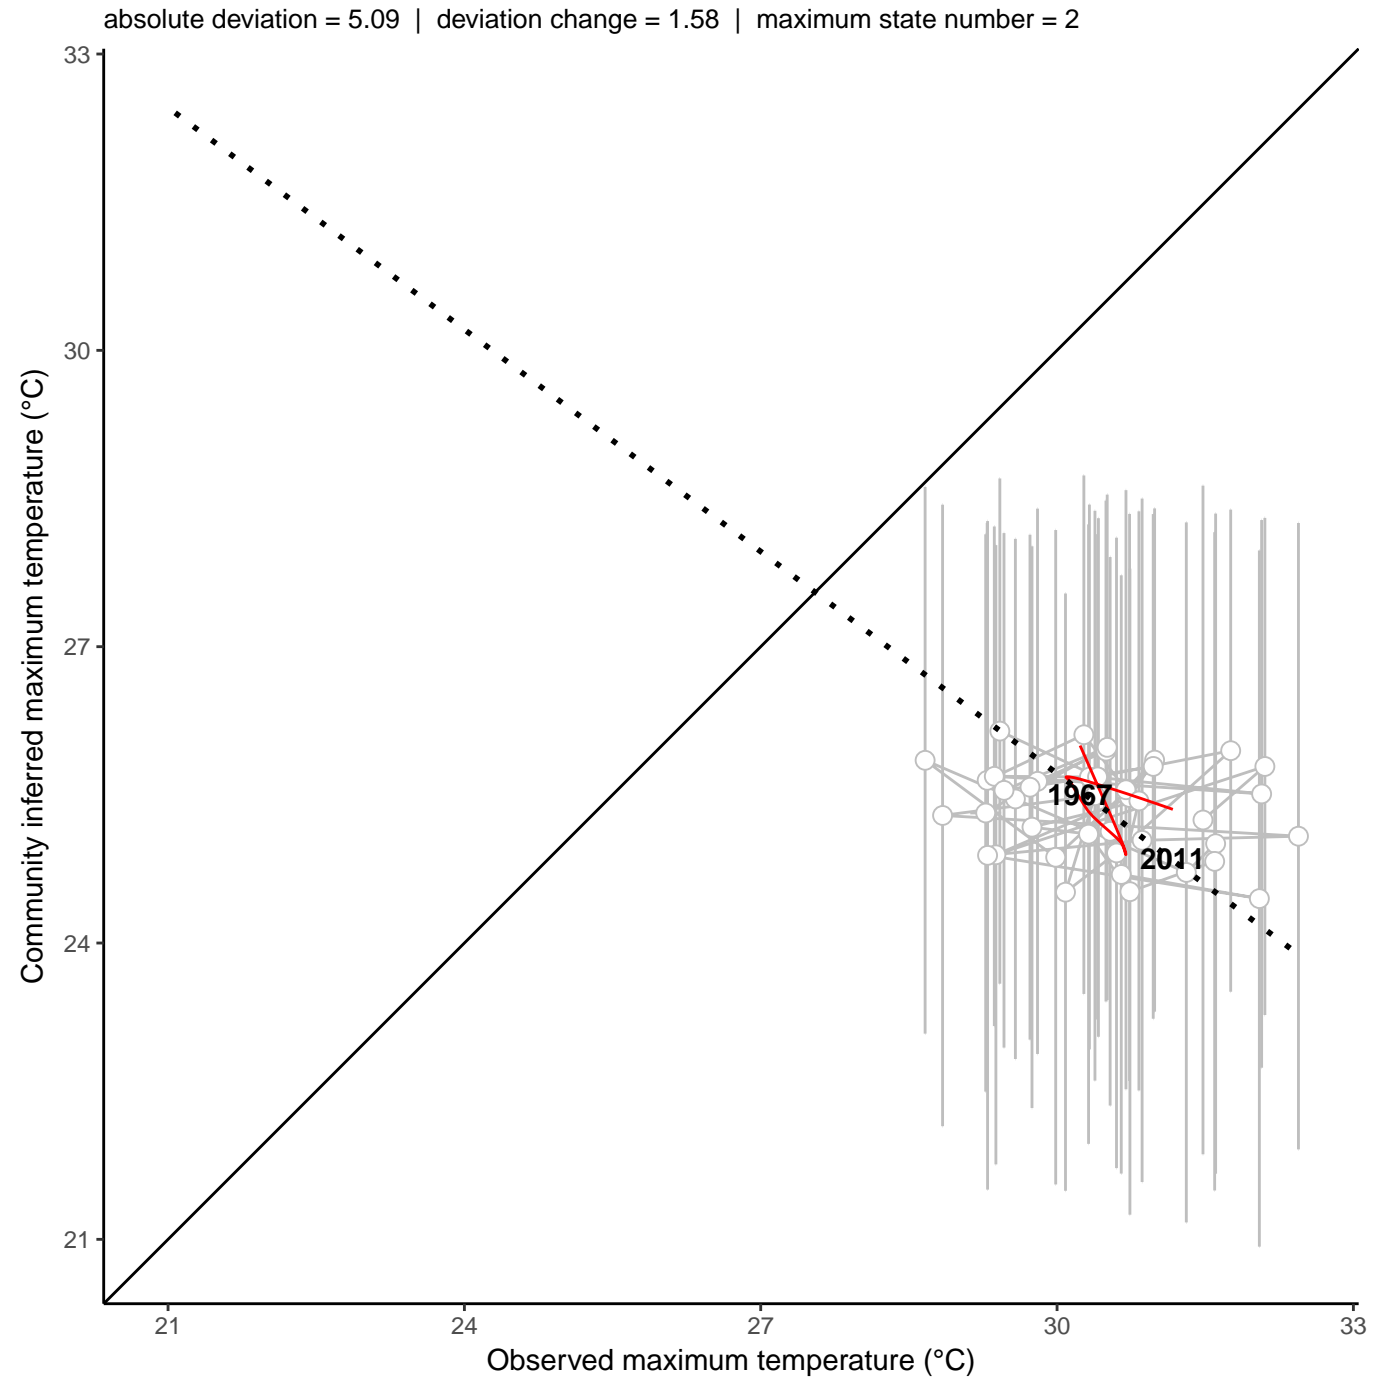

site : 840\_81\_1

absolute deviation = 2.68 | deviation change = 0.56 | maximum state number = 1

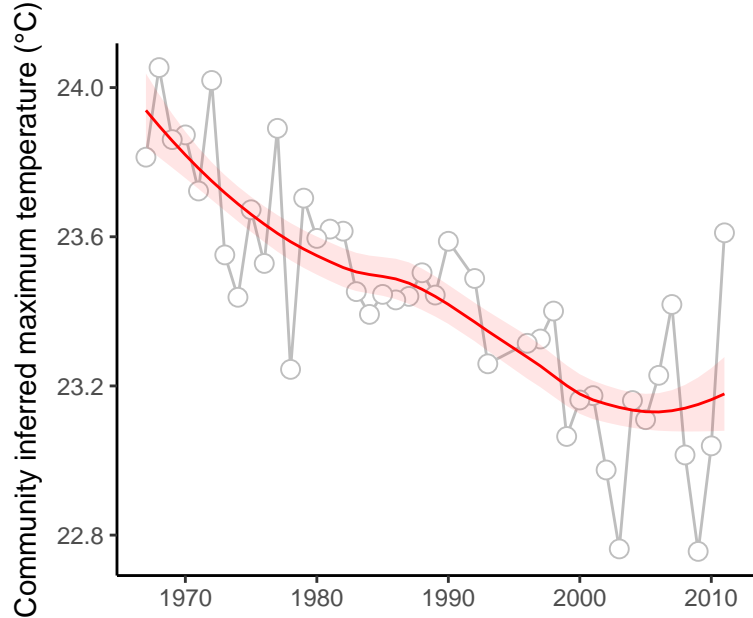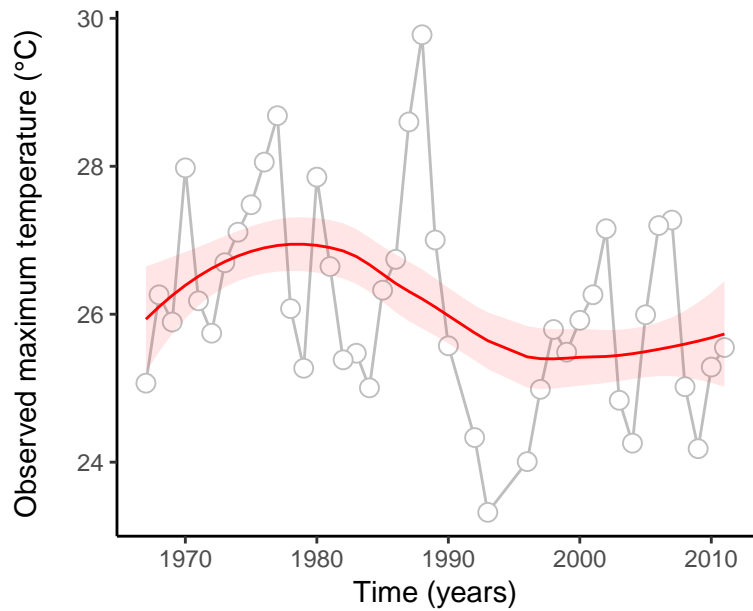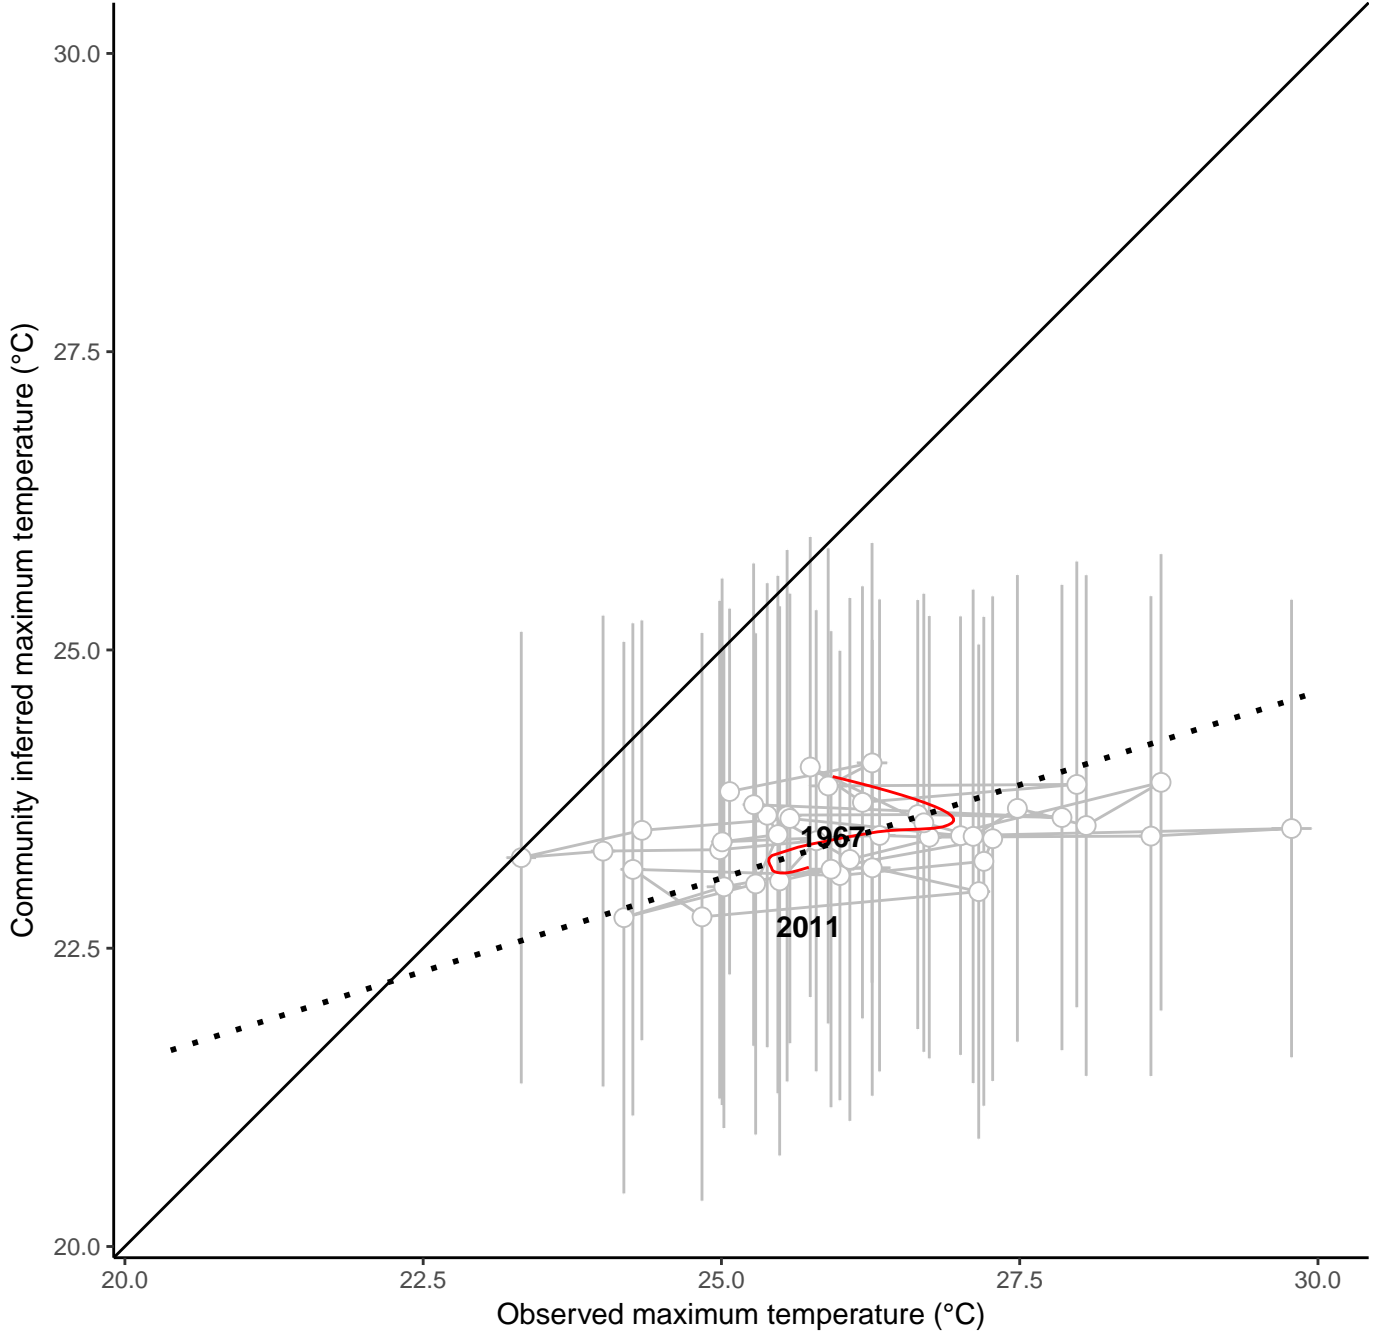

site : 840\_81\_10

absolute deviation = 1.54 | deviation change = 0.34 | maximum state number = 1

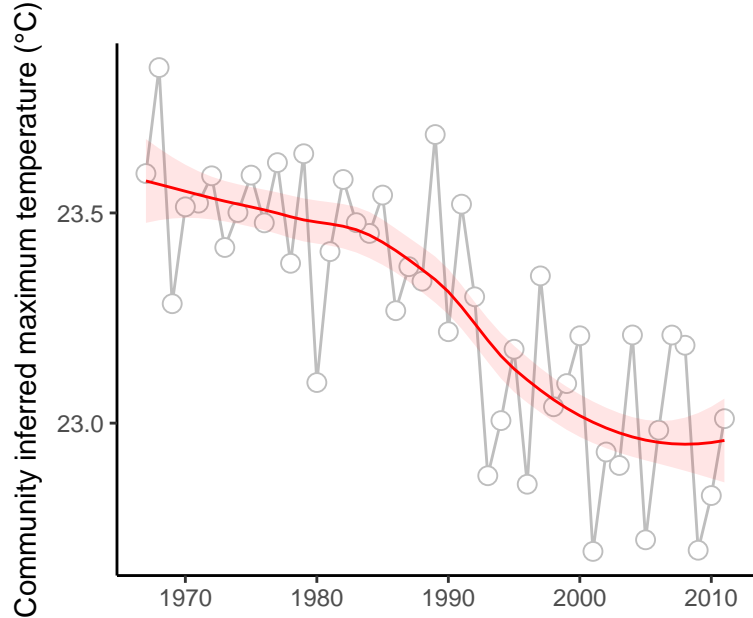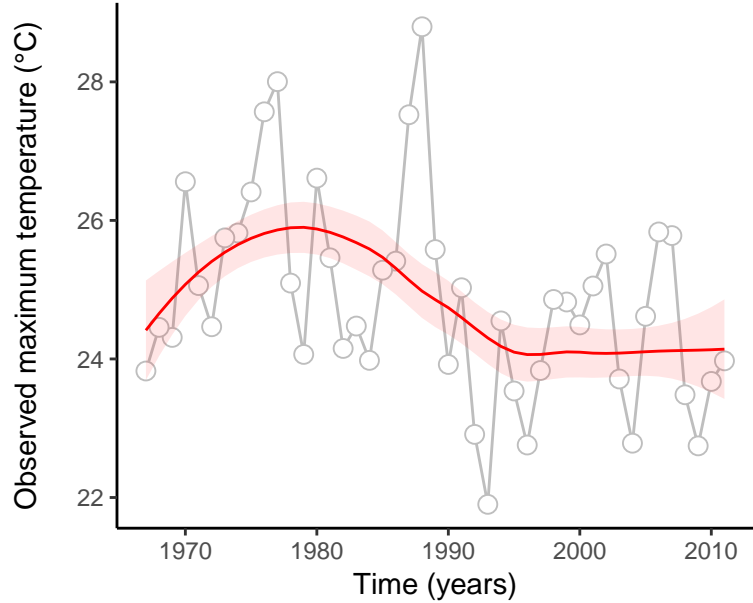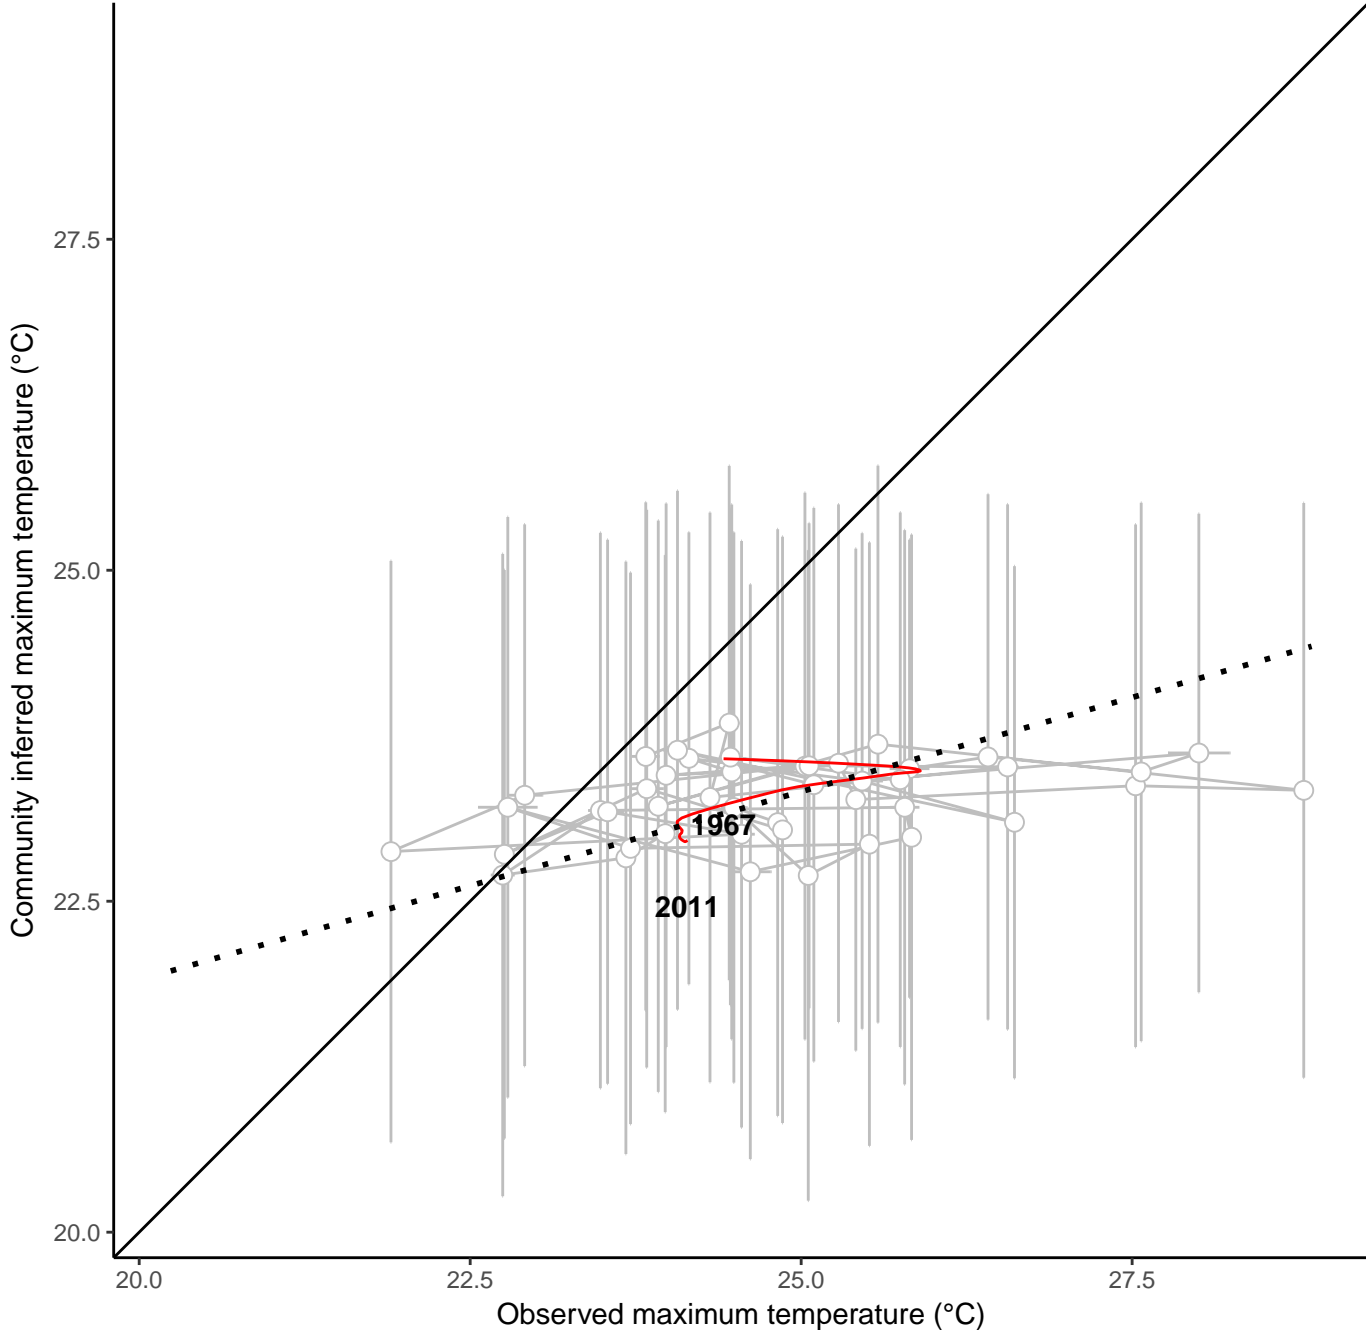

site : 840\_81\_30

absolute deviation = 2.69 | deviation change = 0.55 | maximum state number = 1

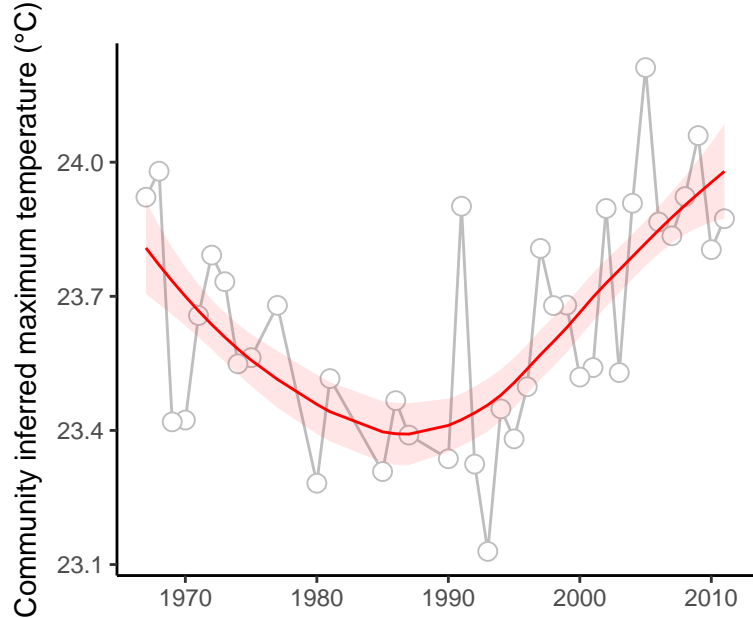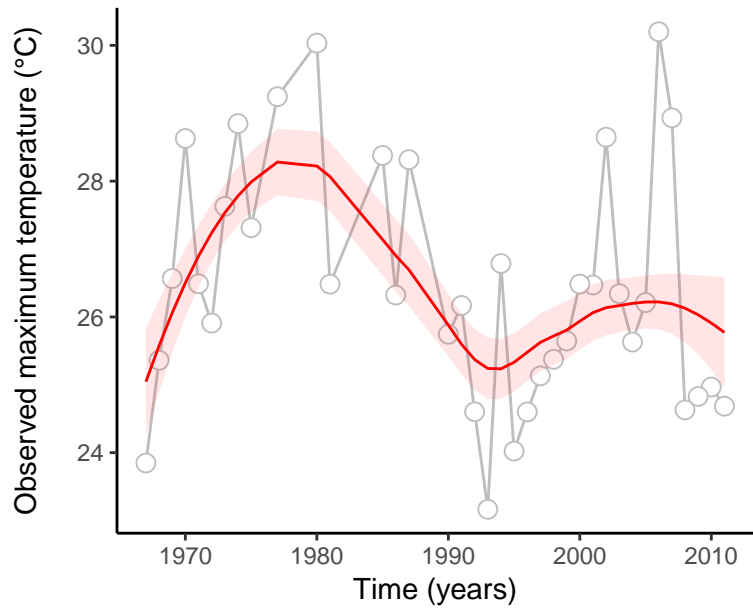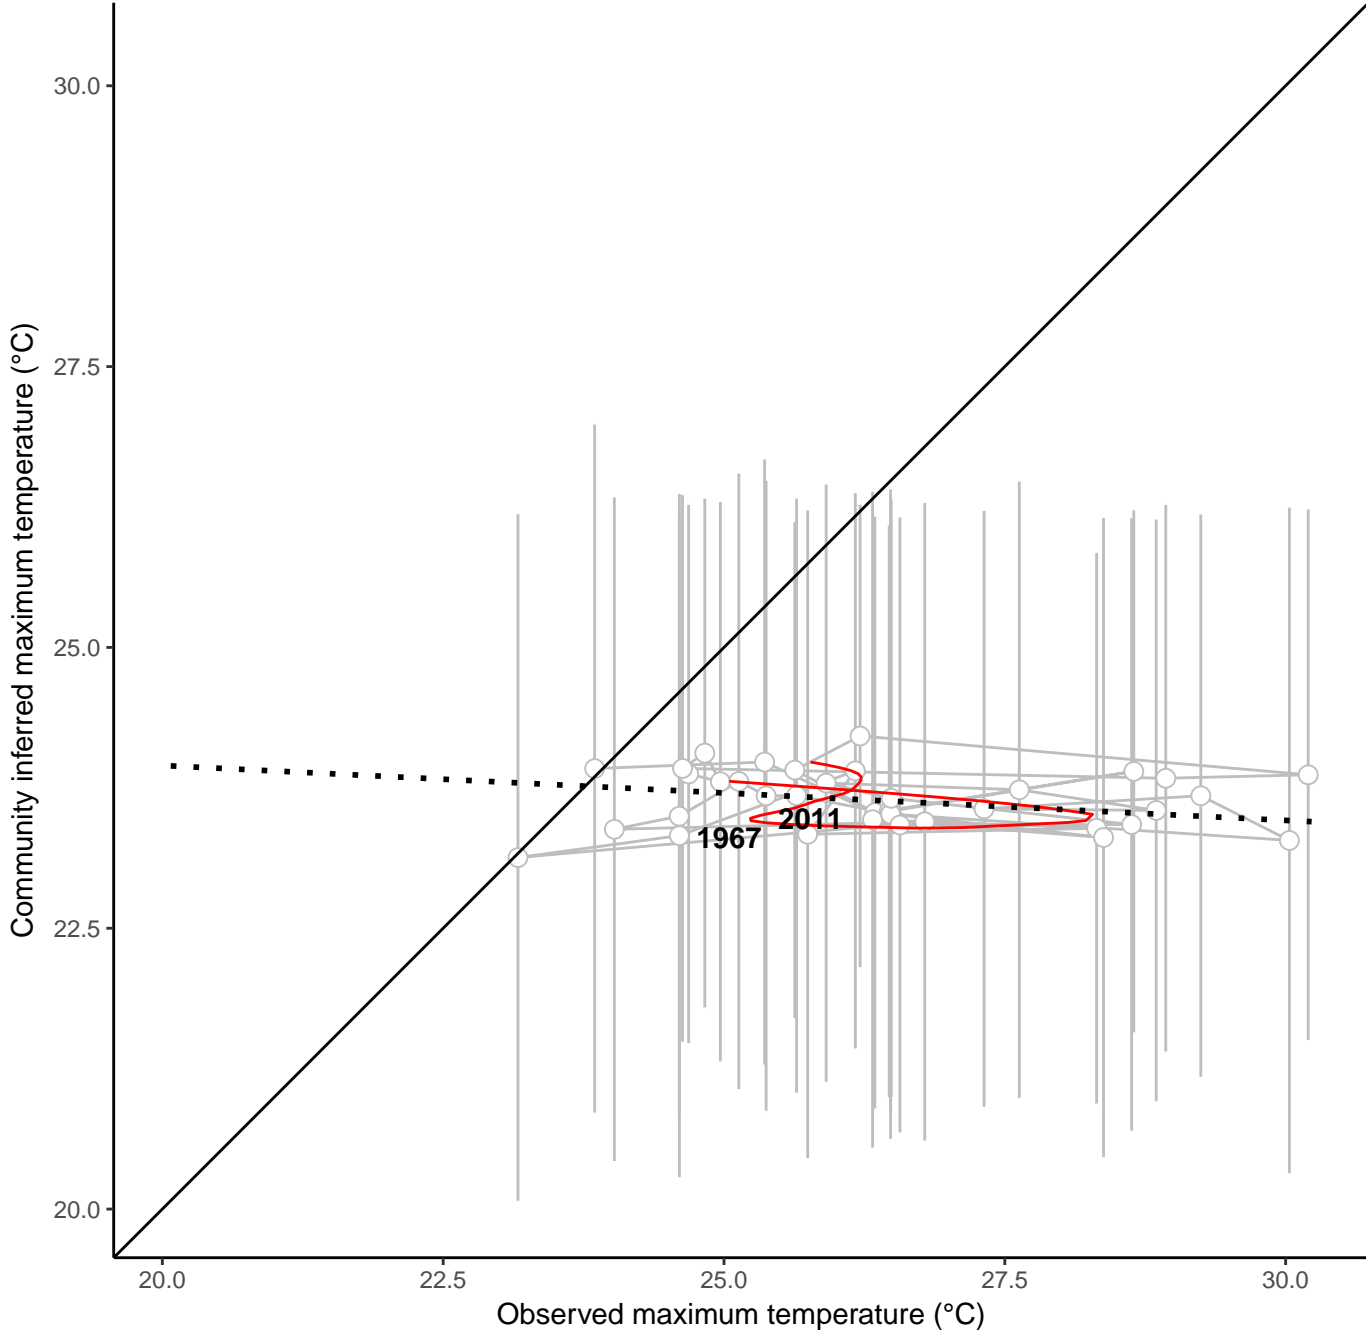



site : 840\_81\_4

absolute deviation = 2.82 | deviation change = -0.05 | maximum state number = 1

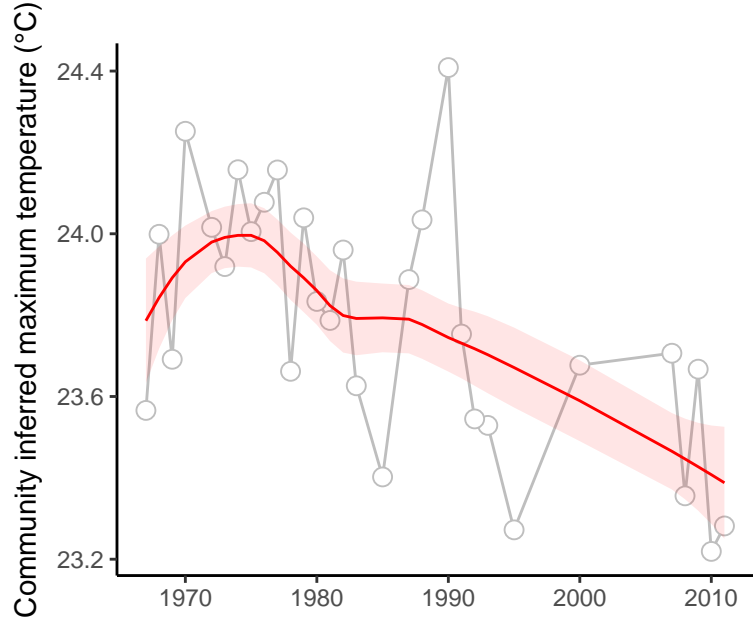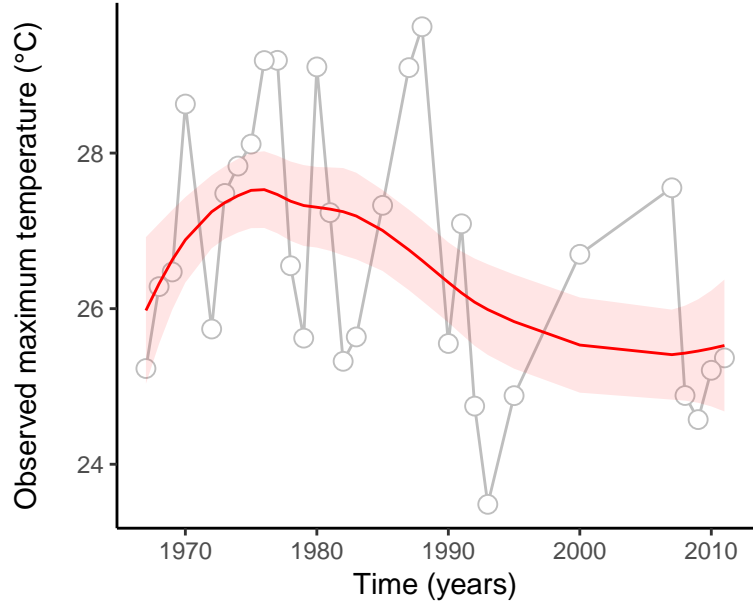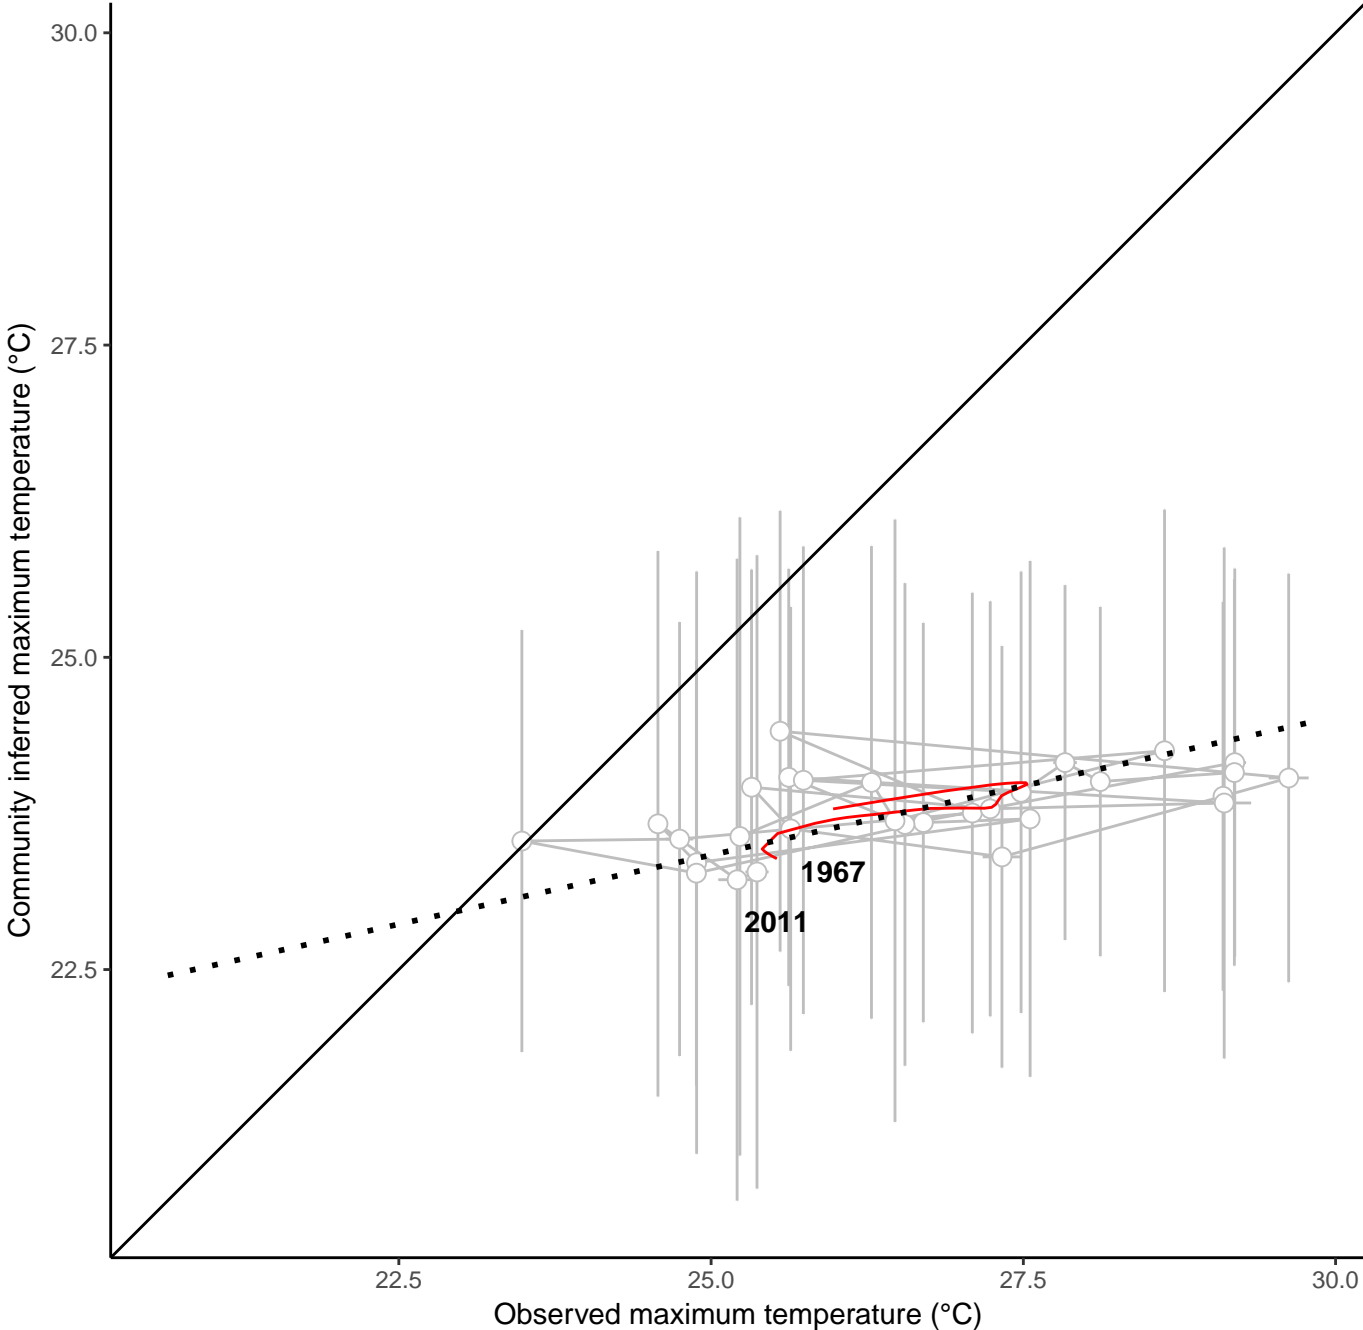

site : 840\_83\_100

absolute deviation = 4.75 | deviation change = 0.2 | maximum state number = 1

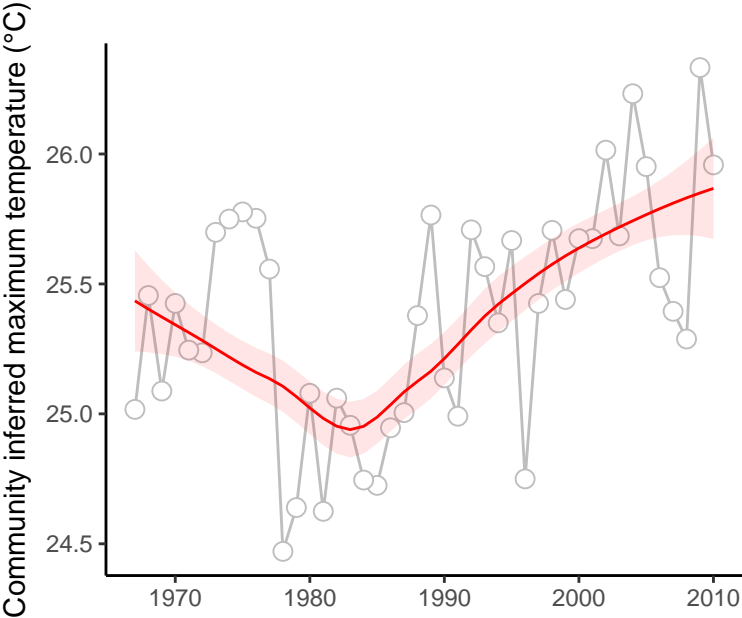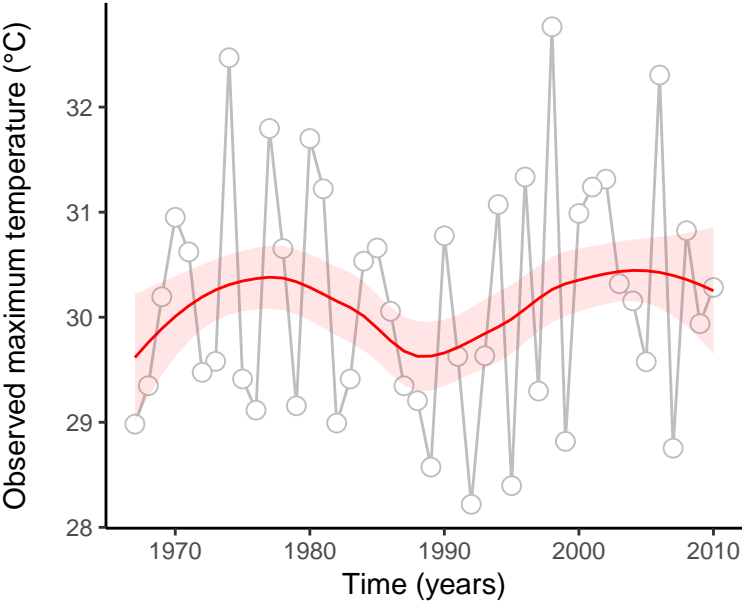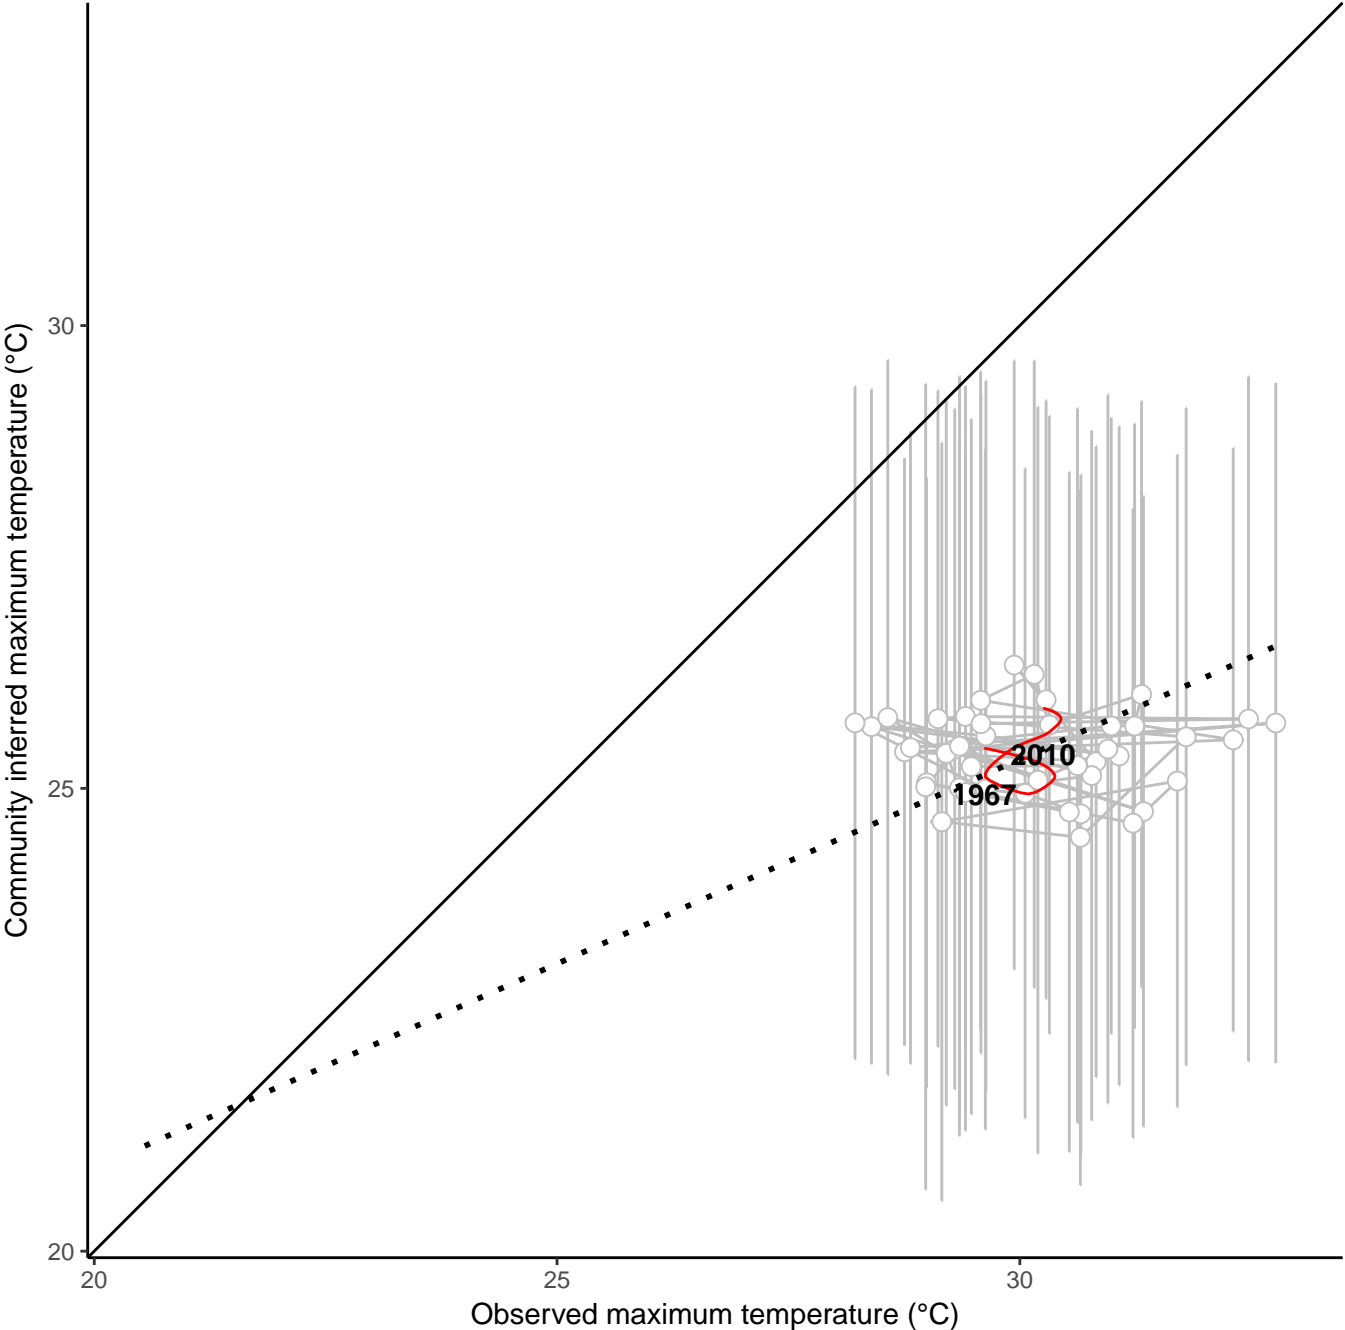

site : 840\_83\_13

absolute deviation = 4.5 | deviation change = -0.53 | maximum state number = 2

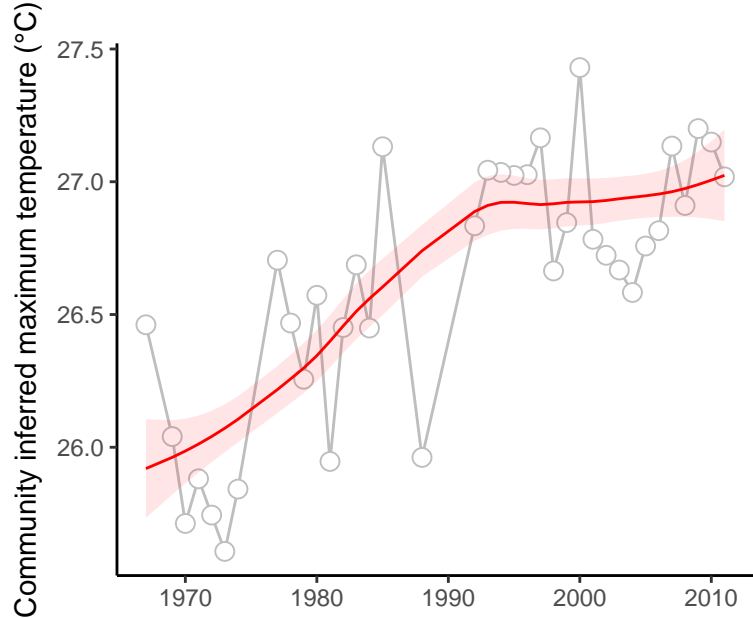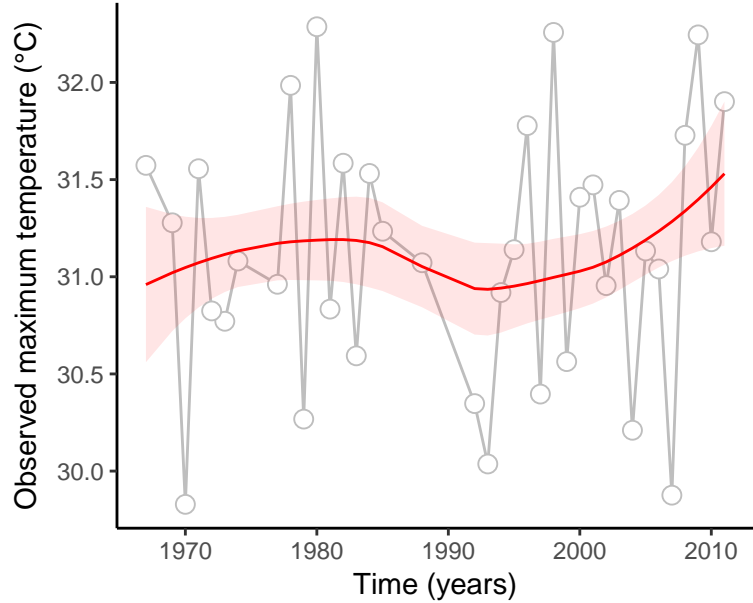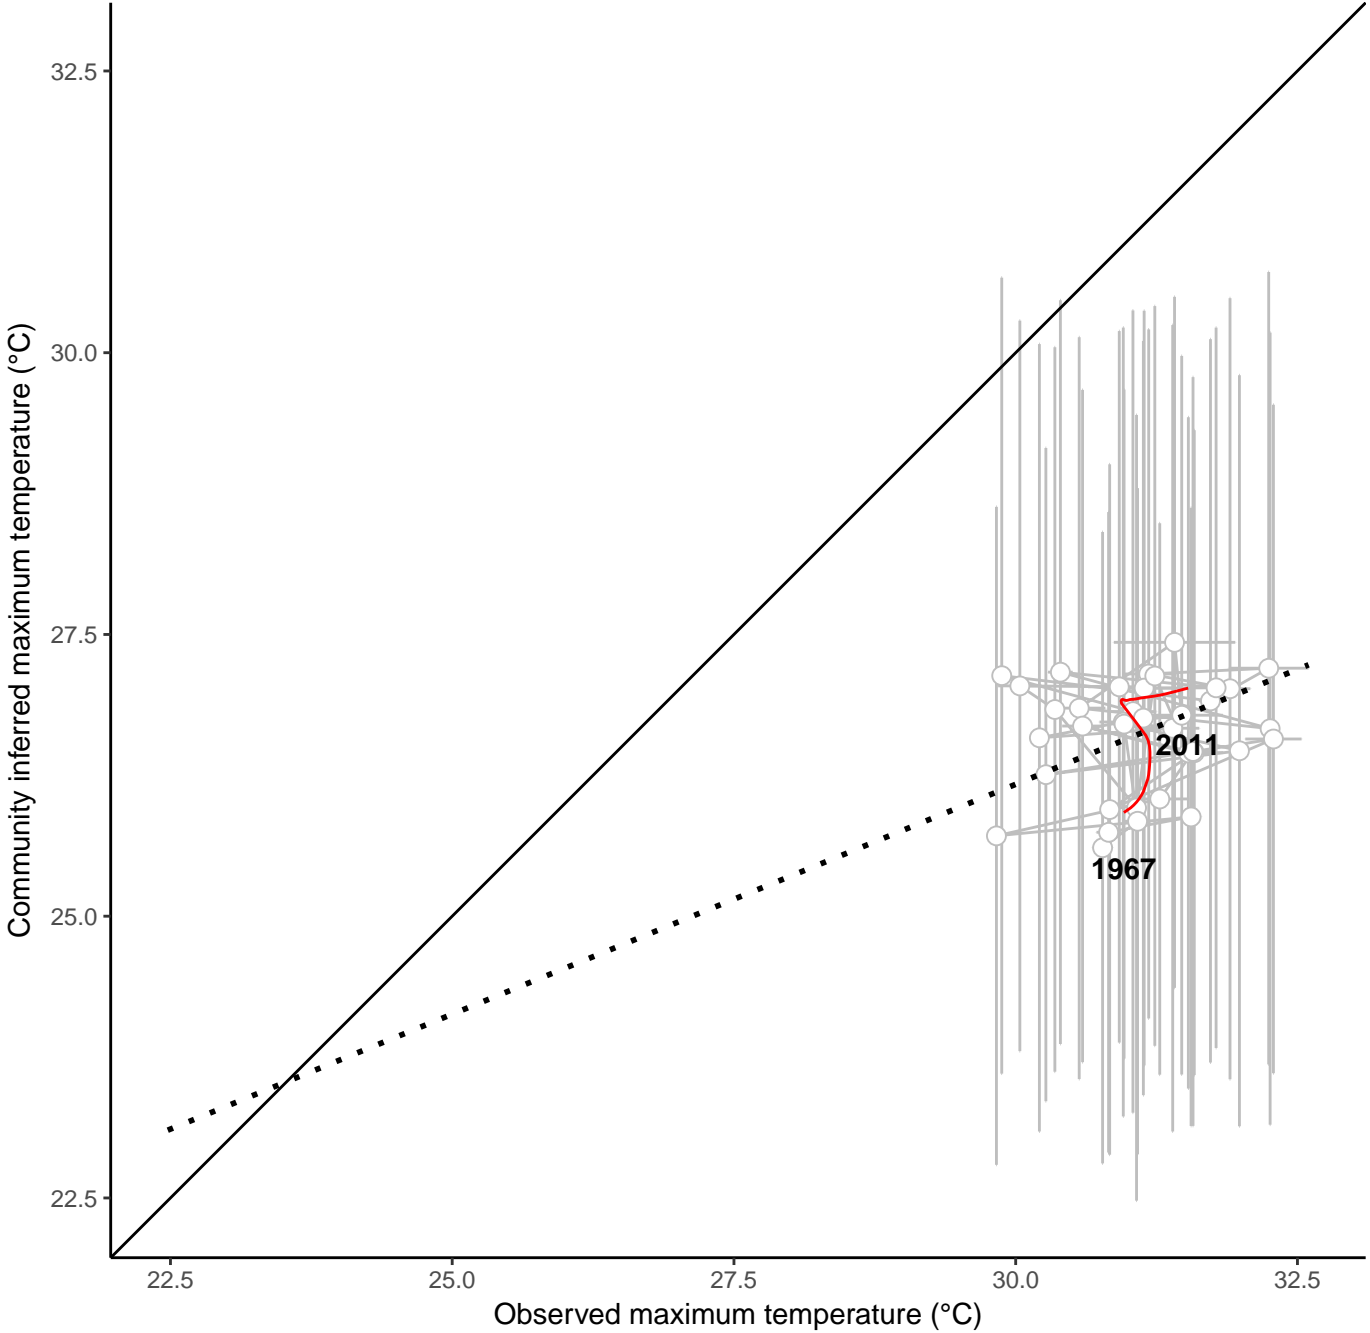

site : 840\_83\_20

absolute deviation = 4.53 | deviation change = 0.81 | maximum state number = 2

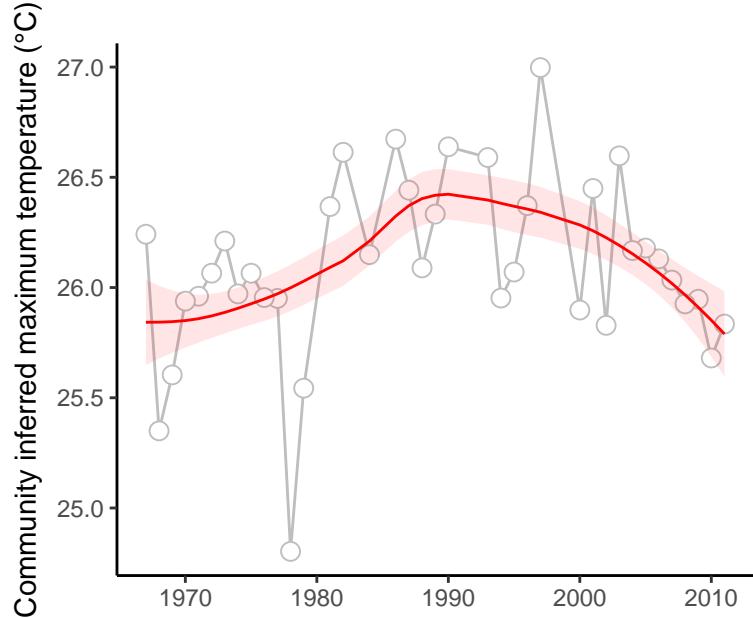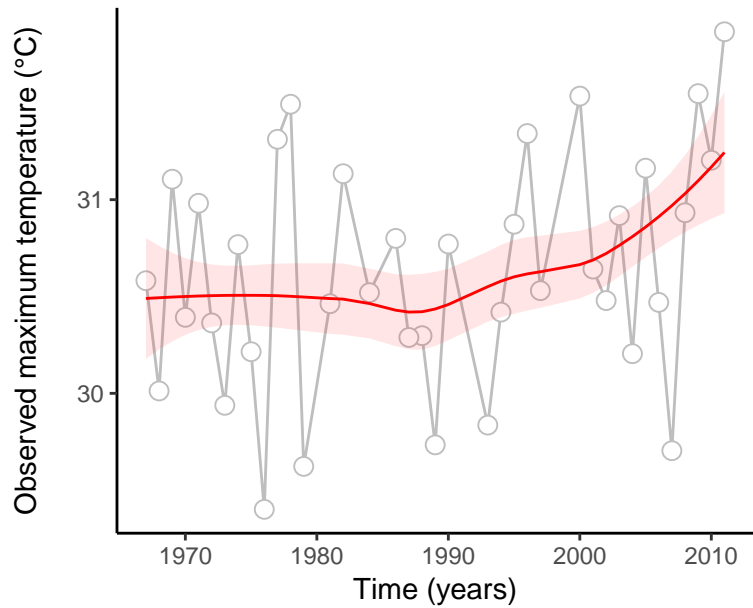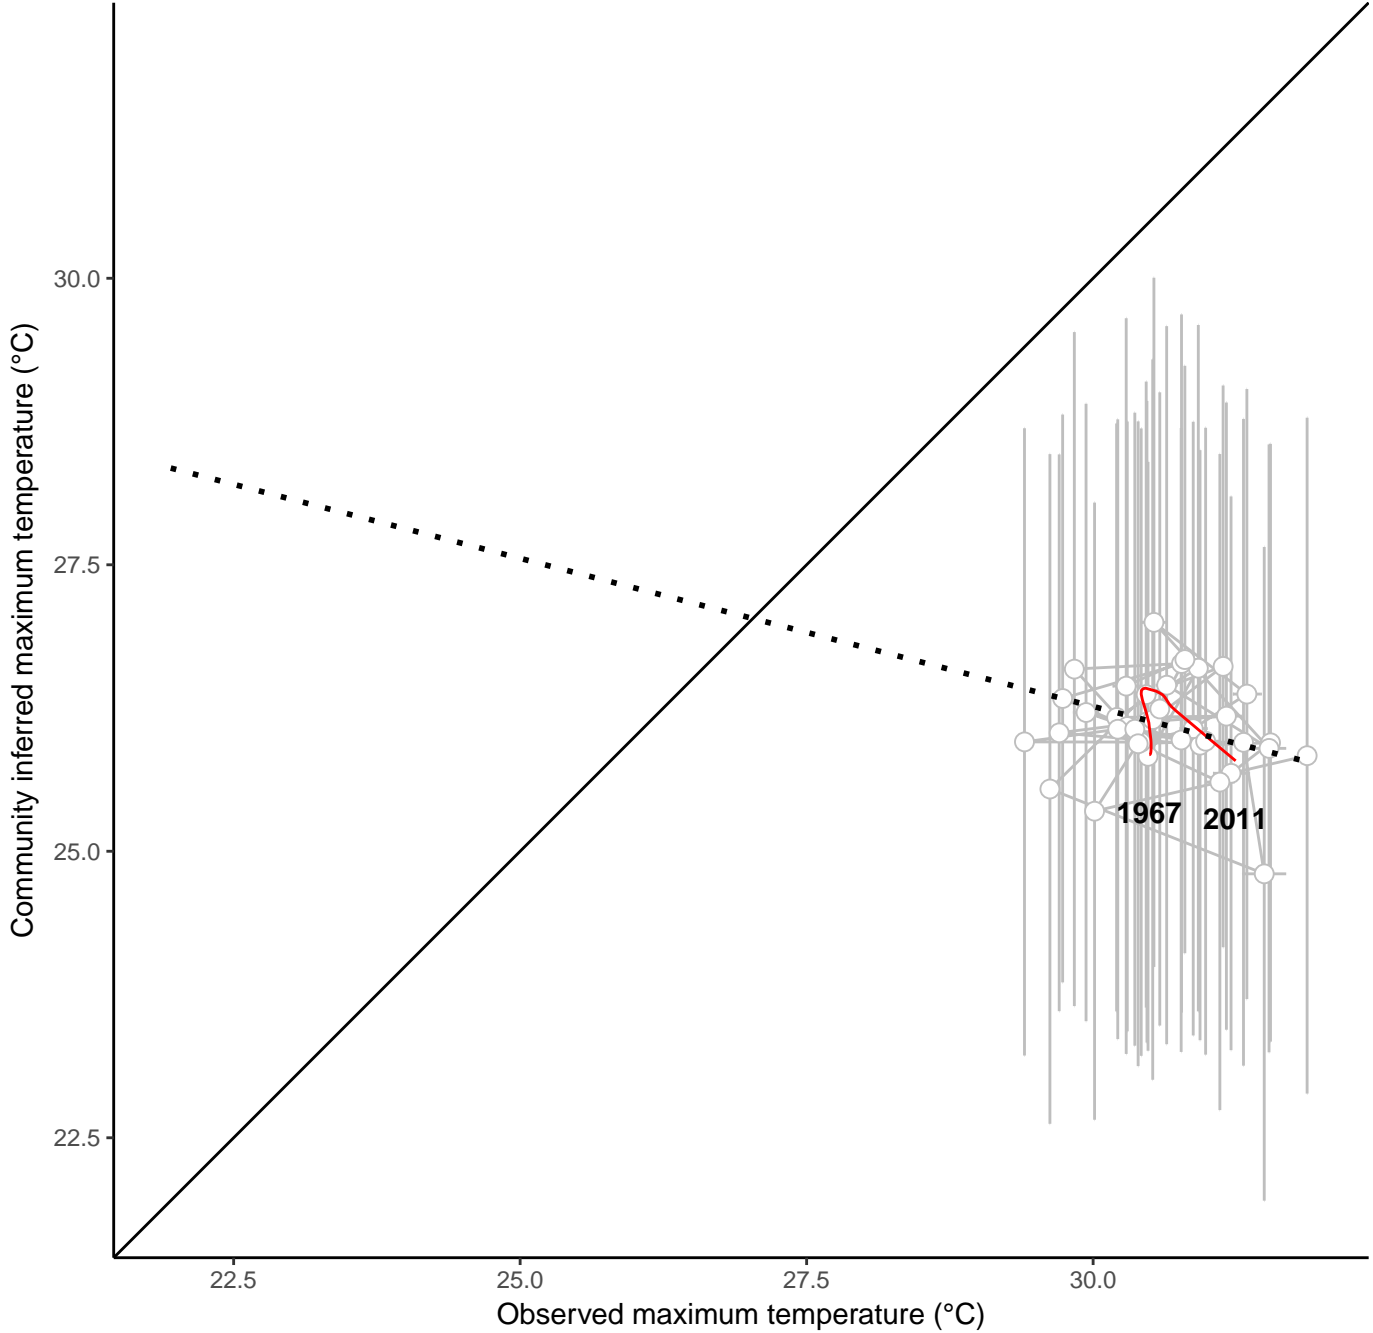

site : 840\_83\_27

absolute deviation = 5.86 | deviation change = 0.04 | maximum state number = 1

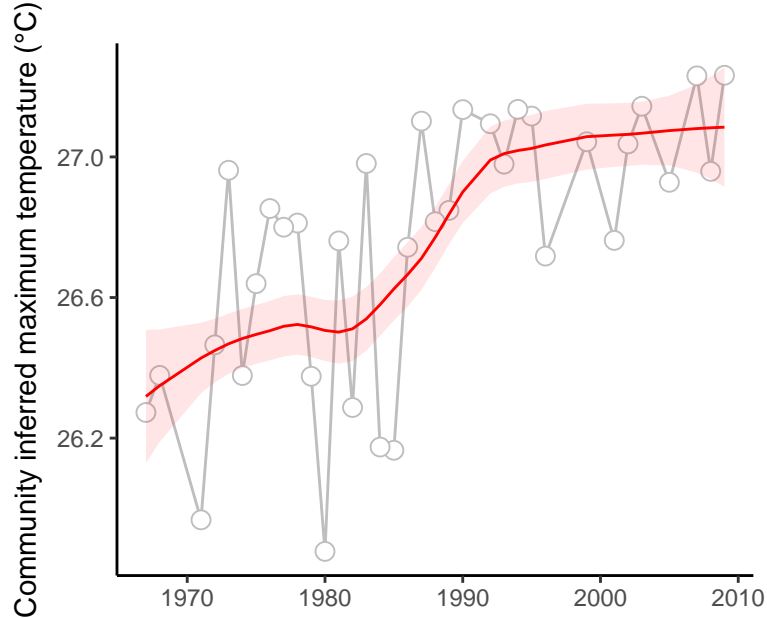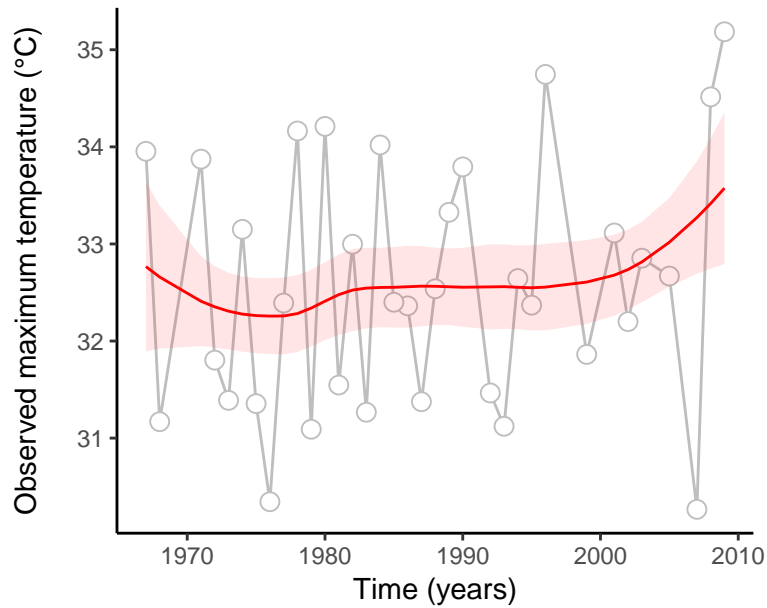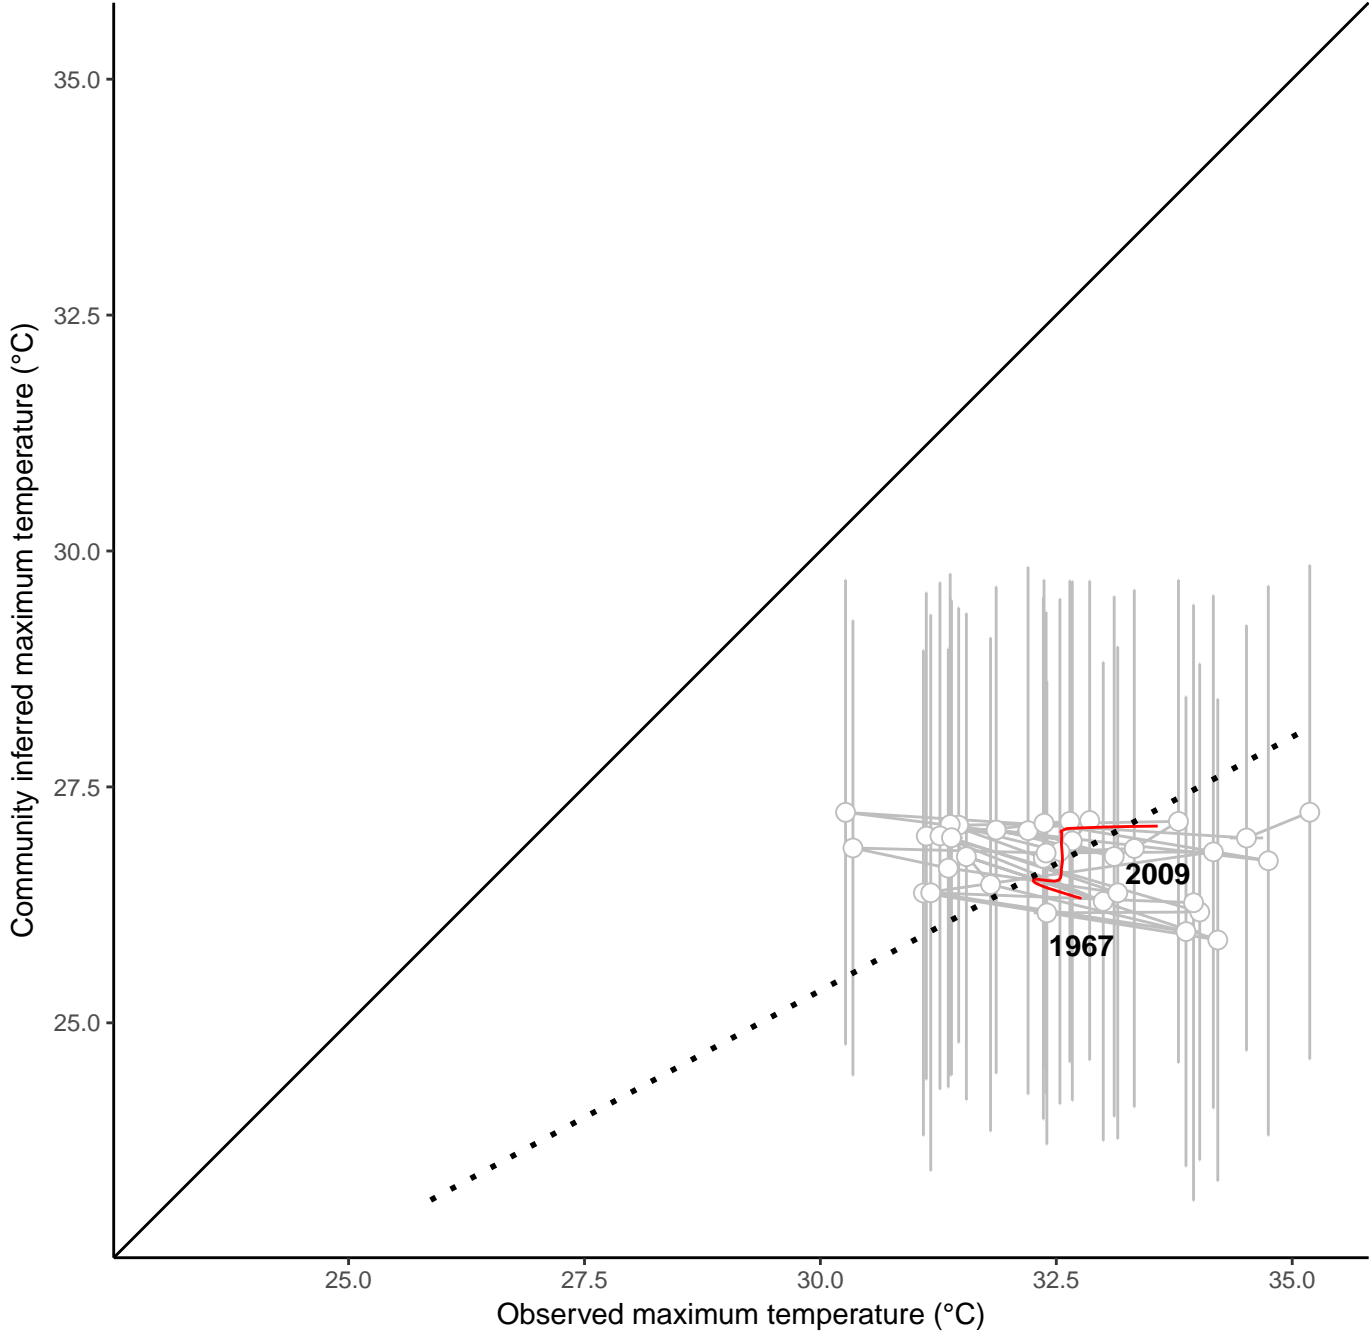

site : 840\_83\_74

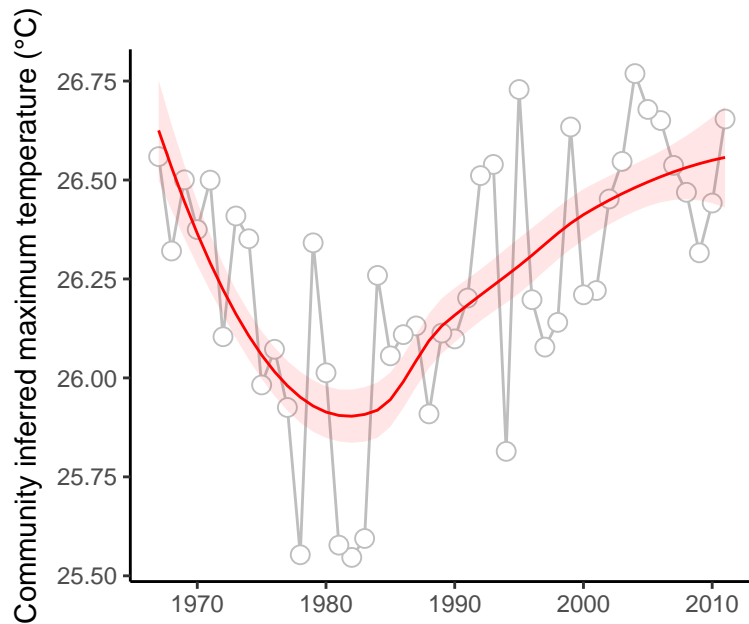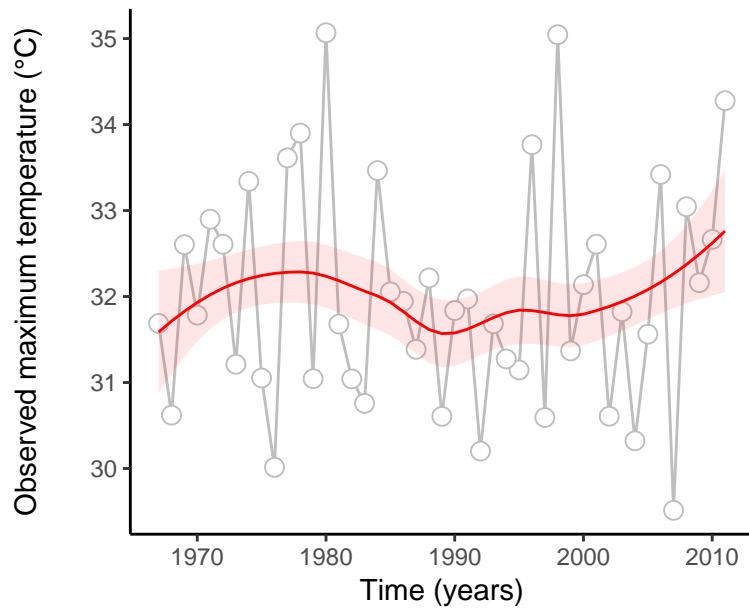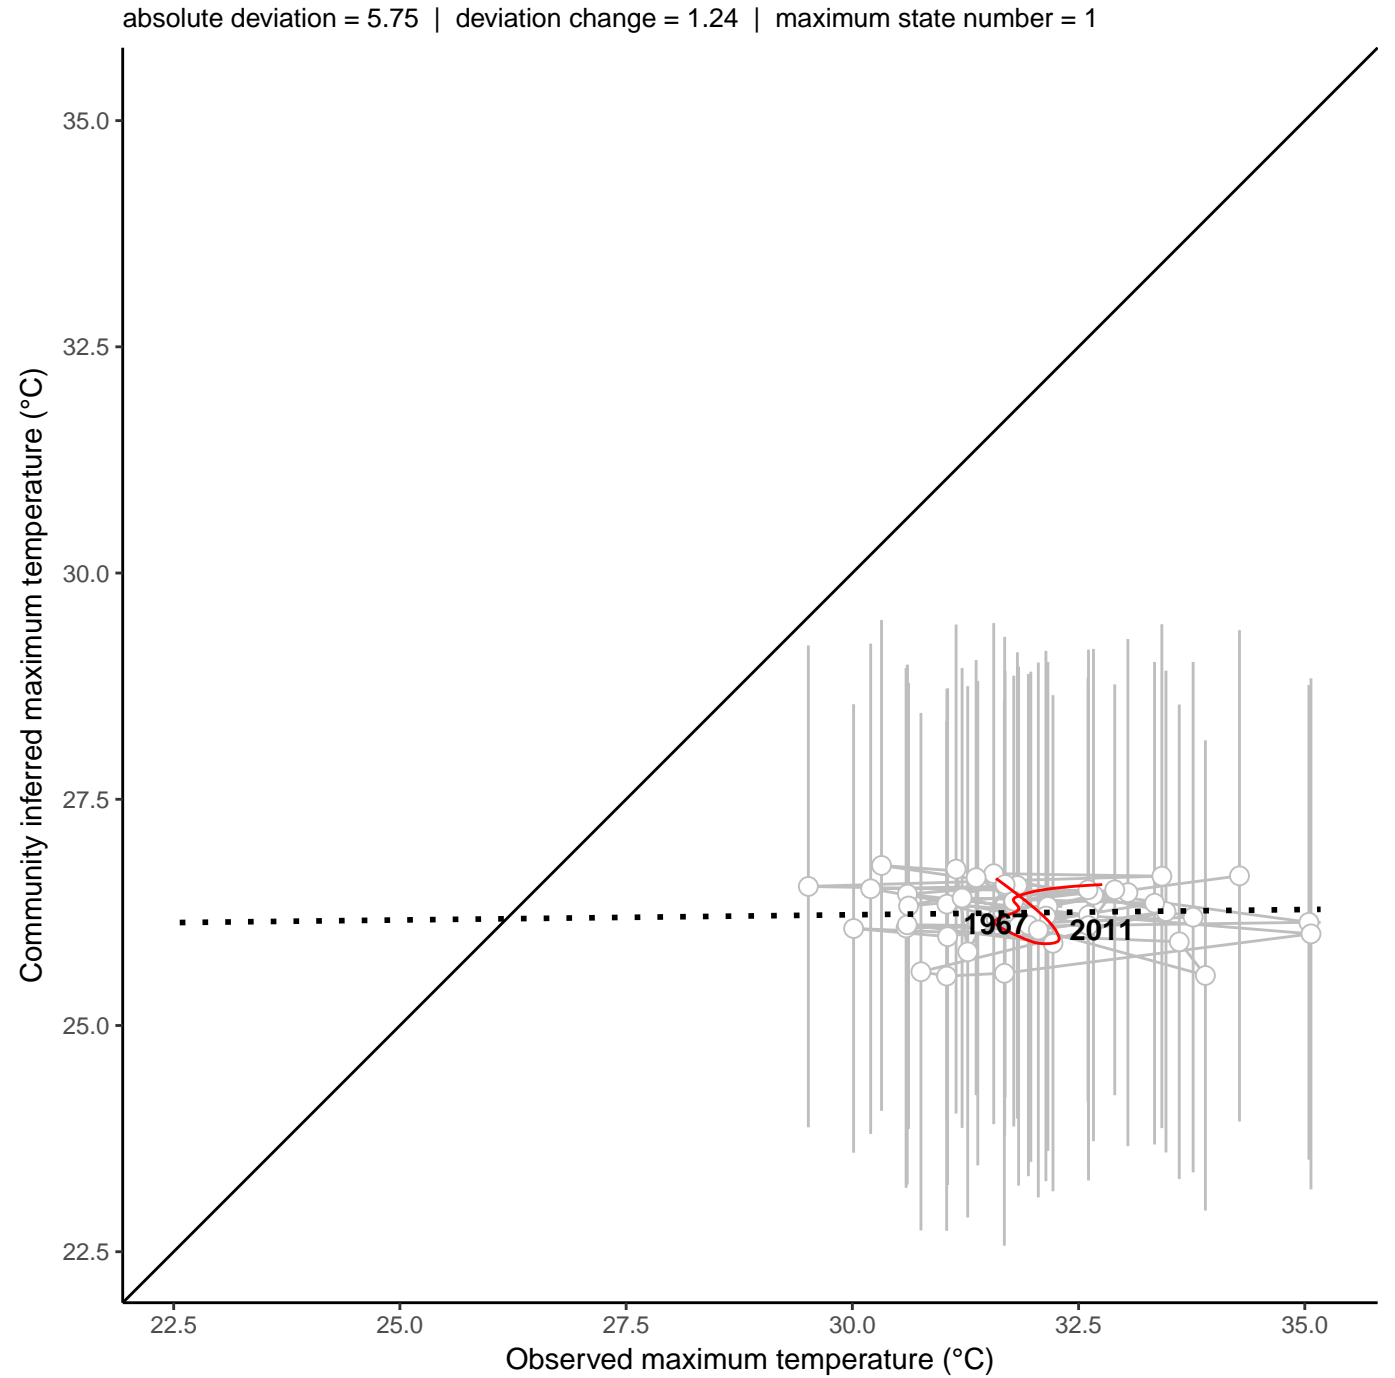

site : 840\_88\_3

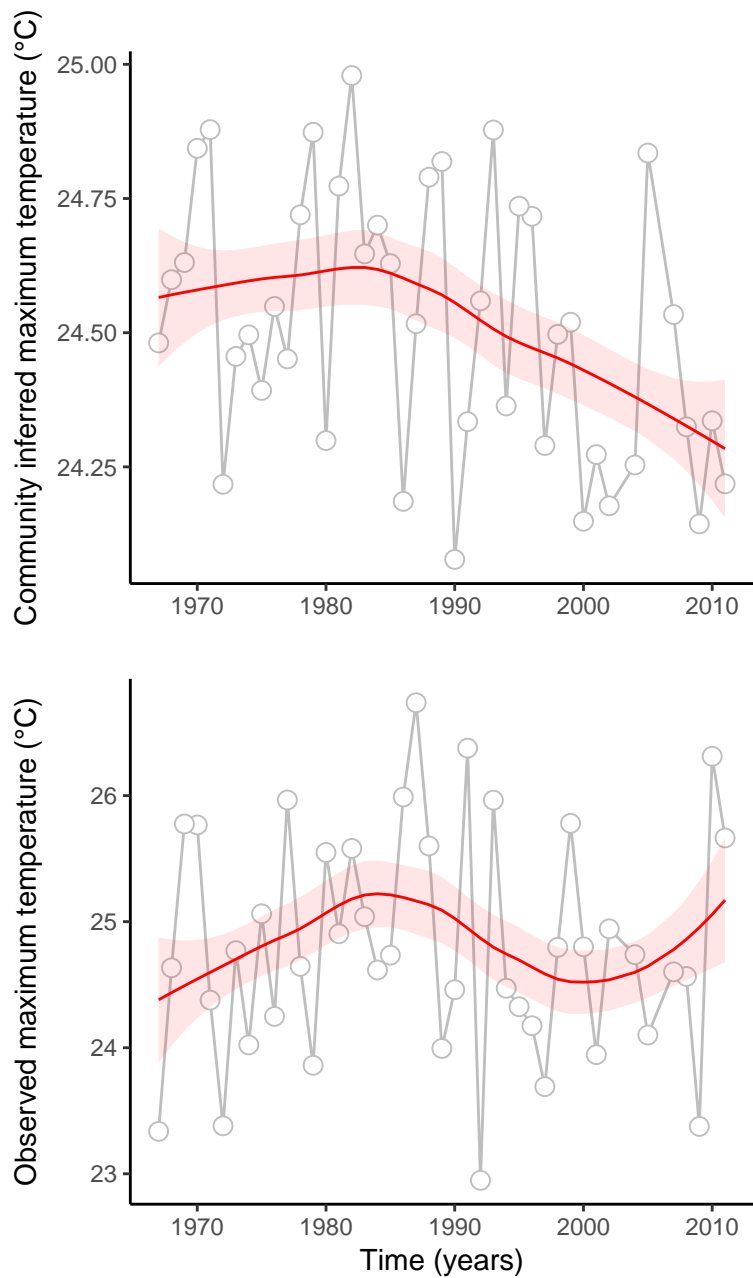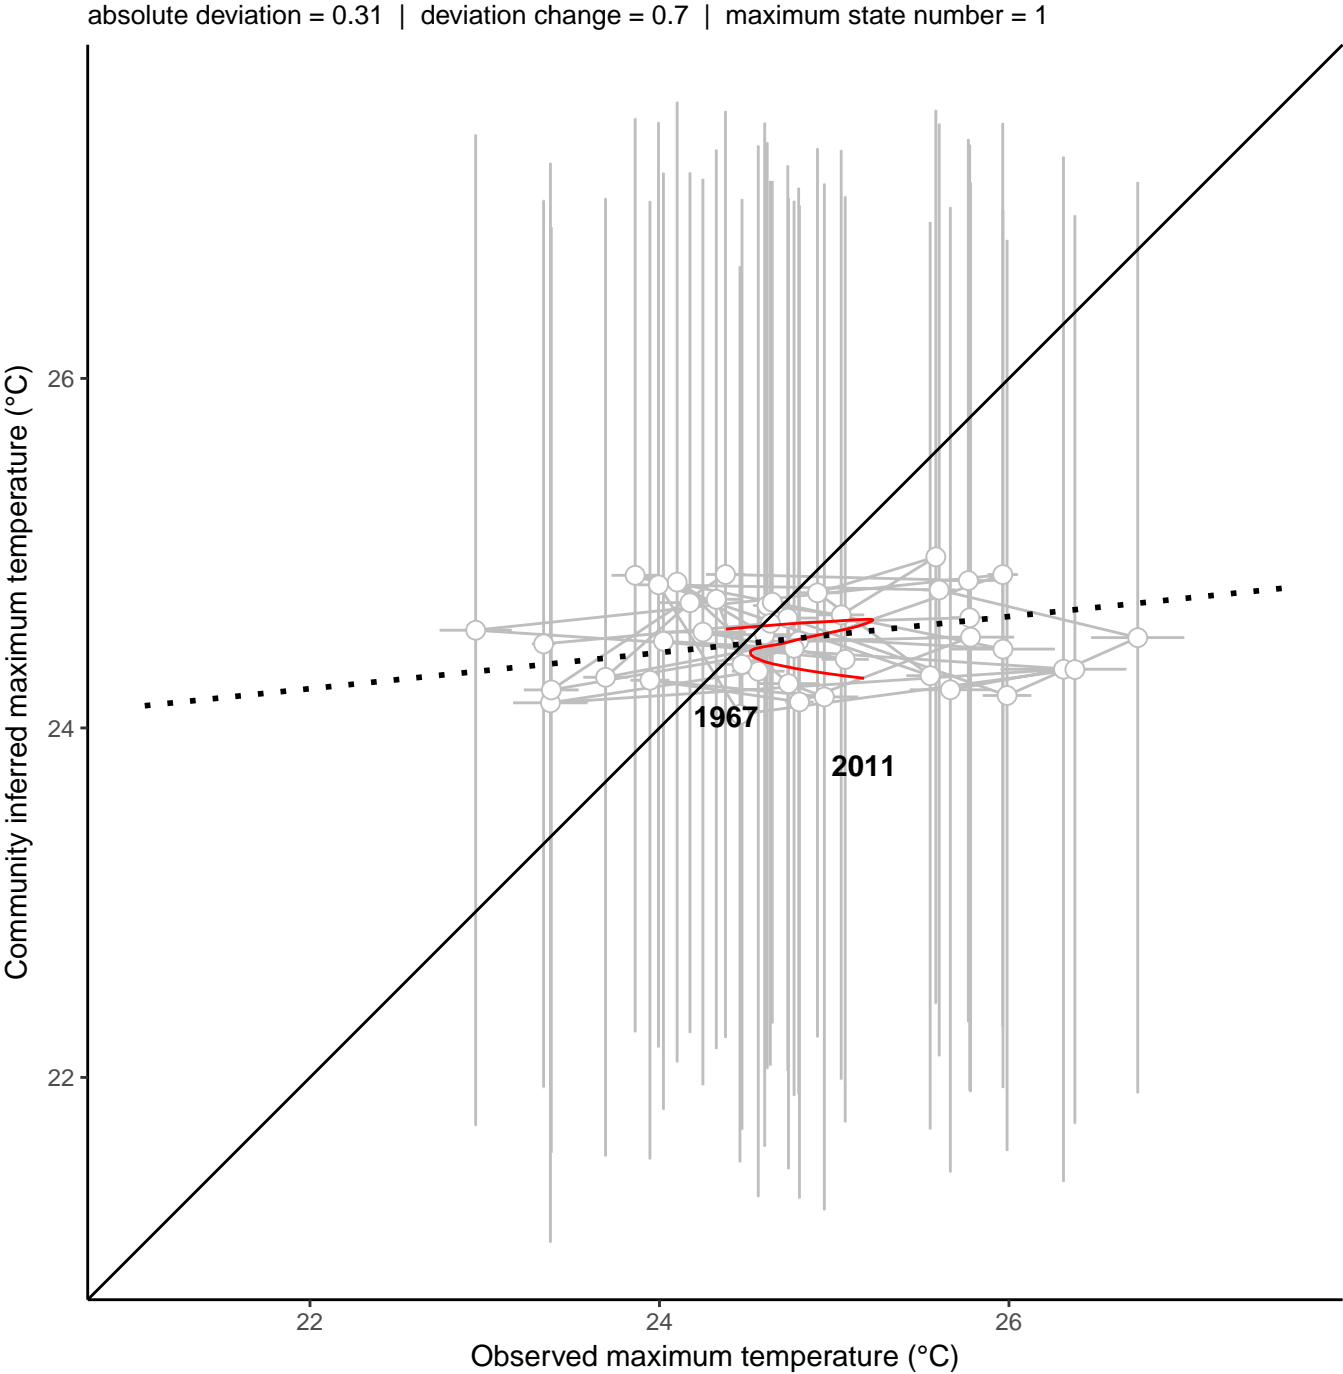

site : 840\_17\_13

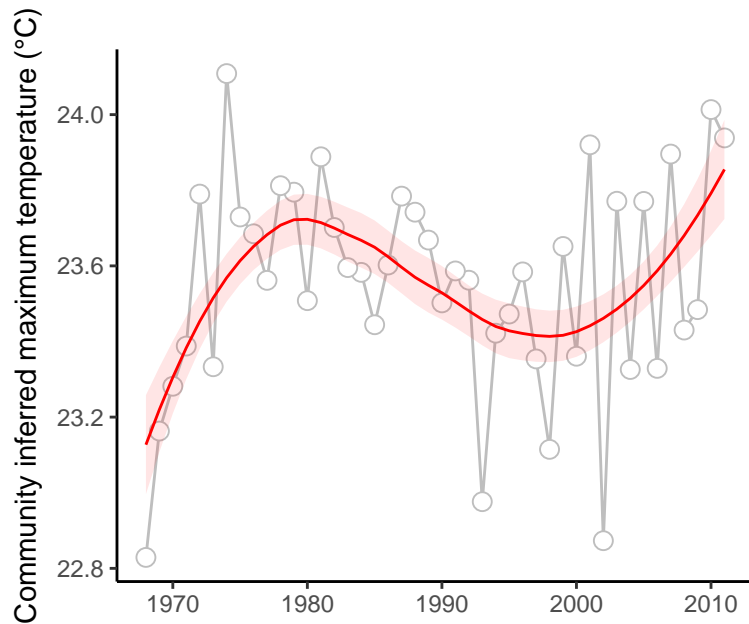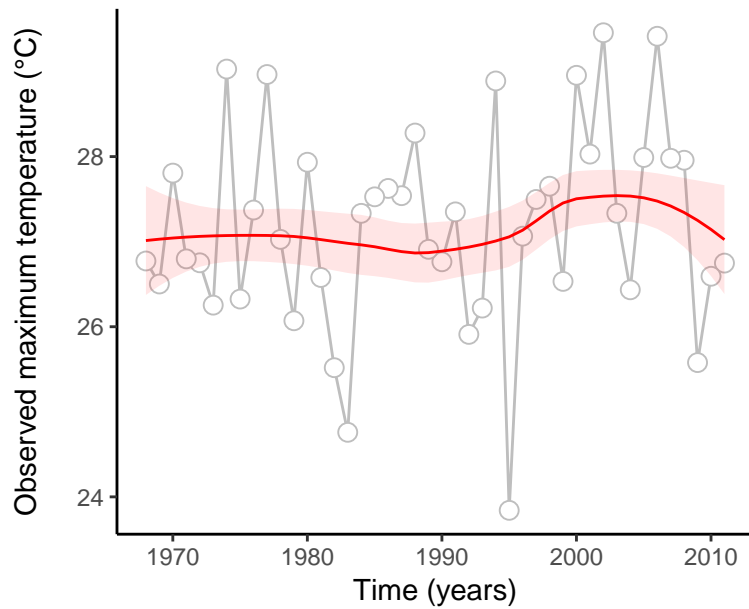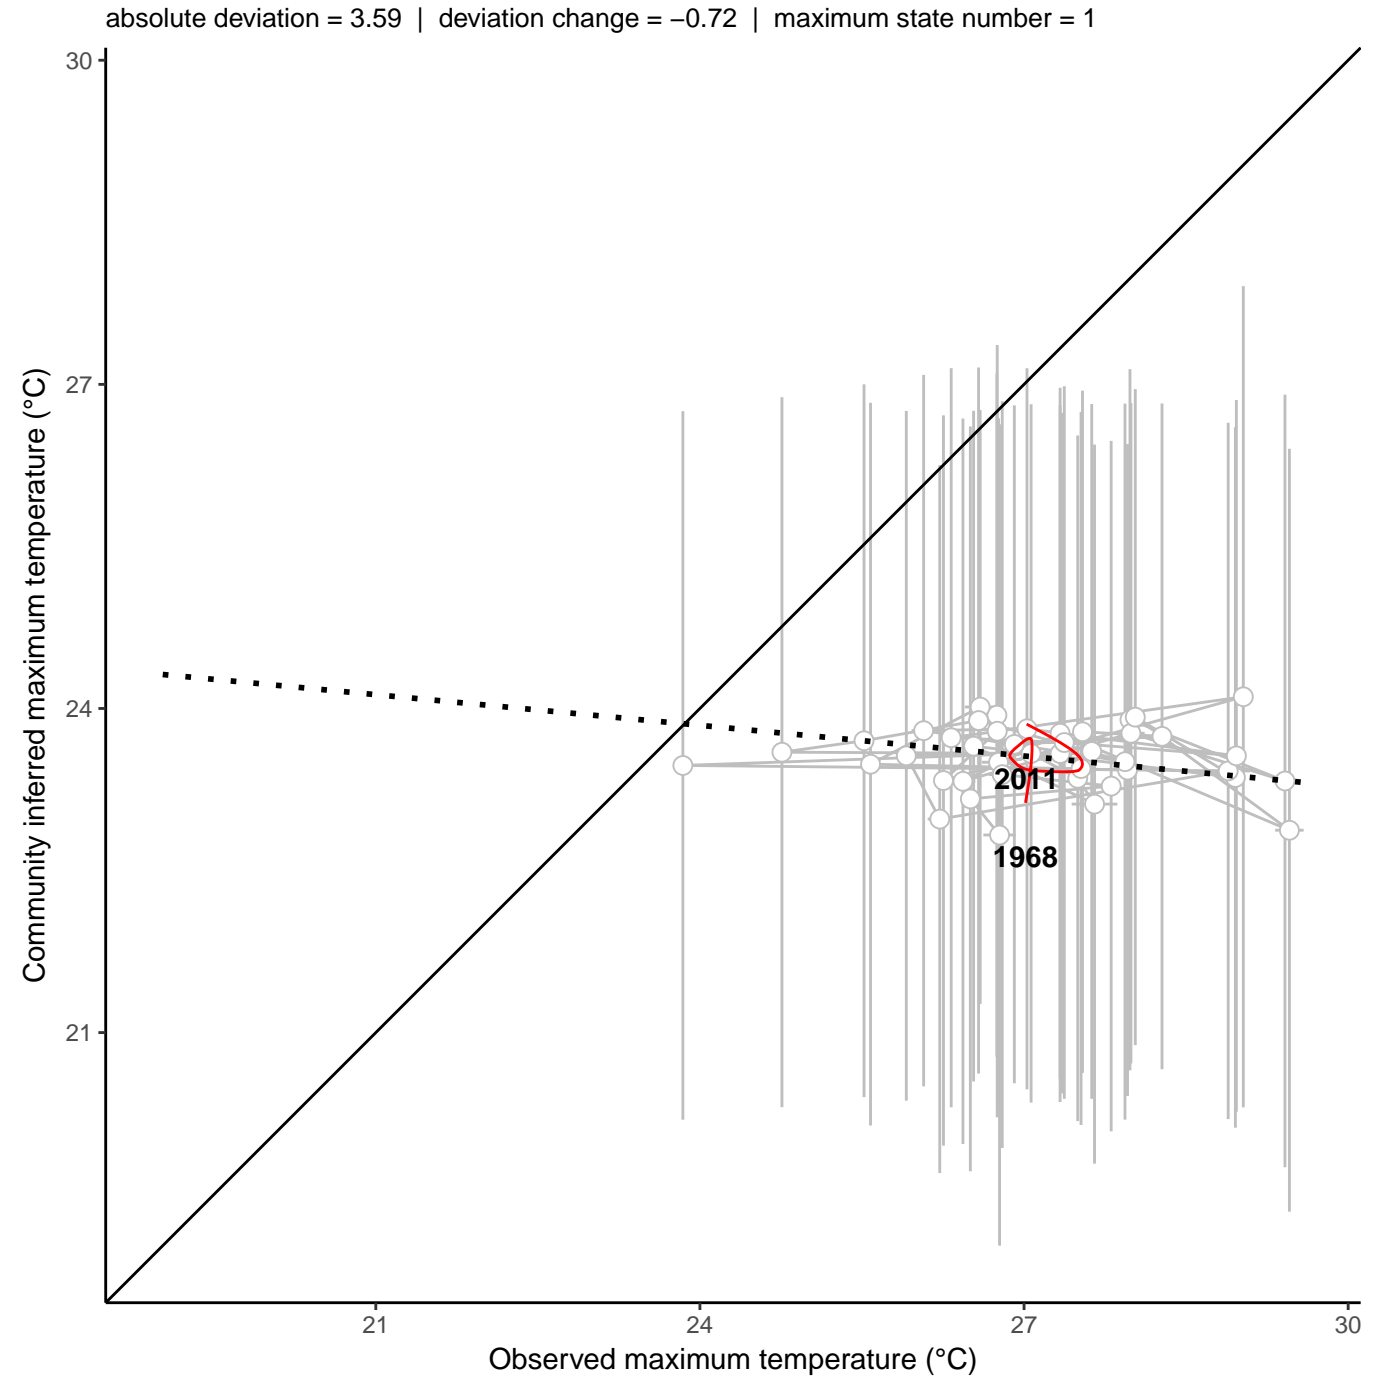



site : 840\_17\_14

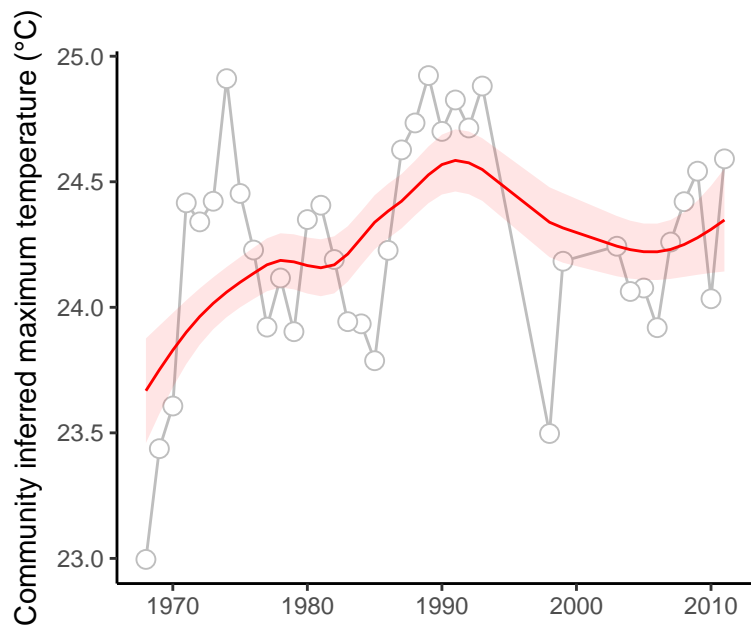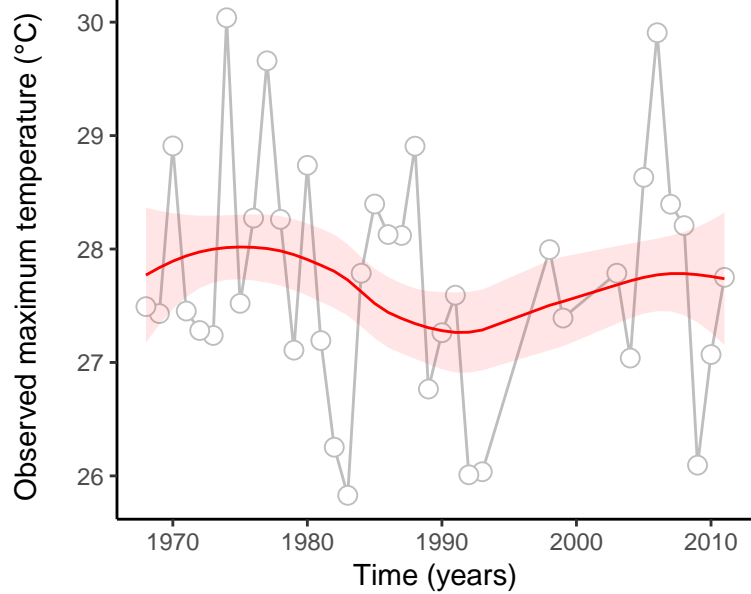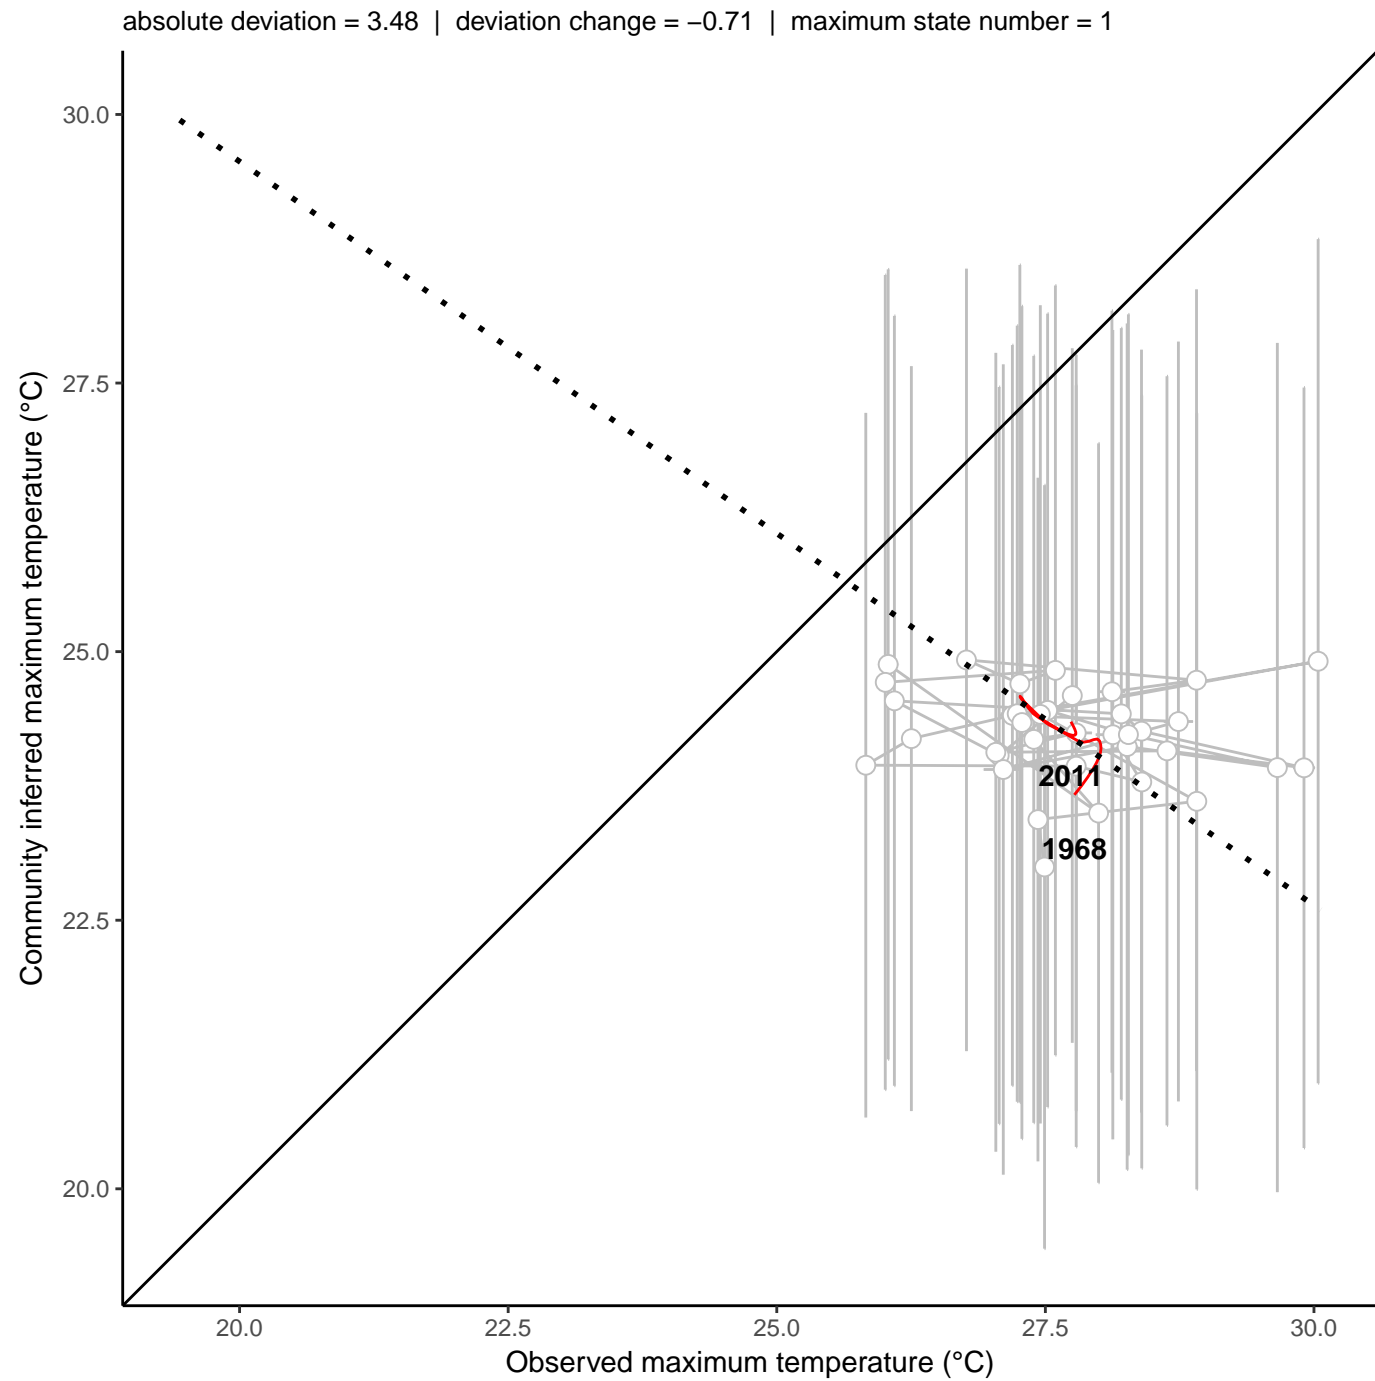

site : 840\_17\_5

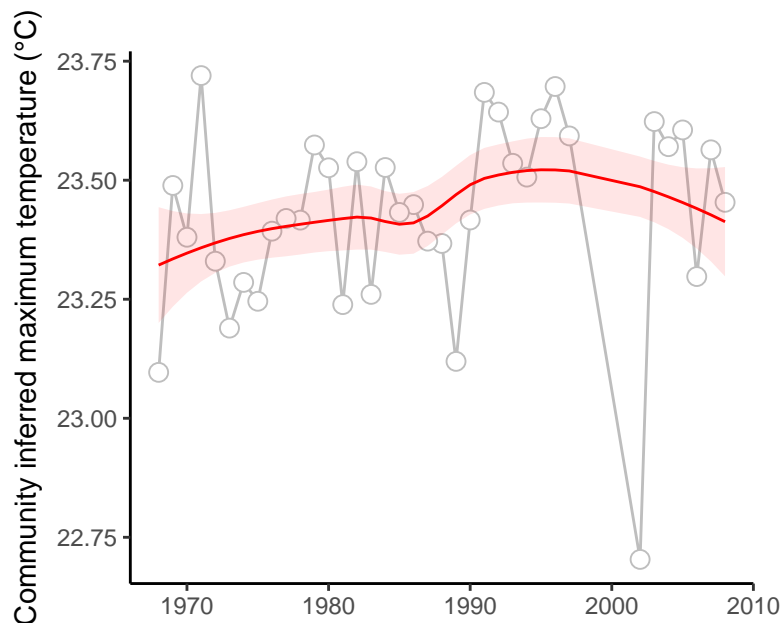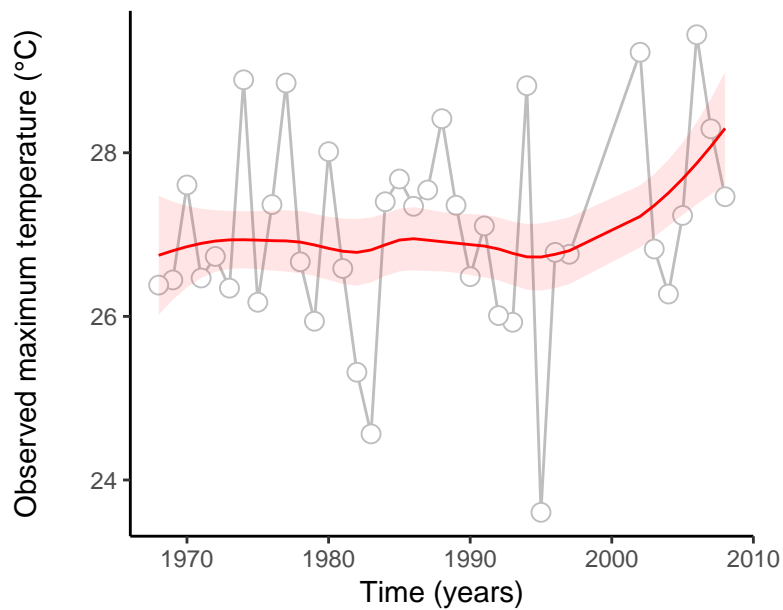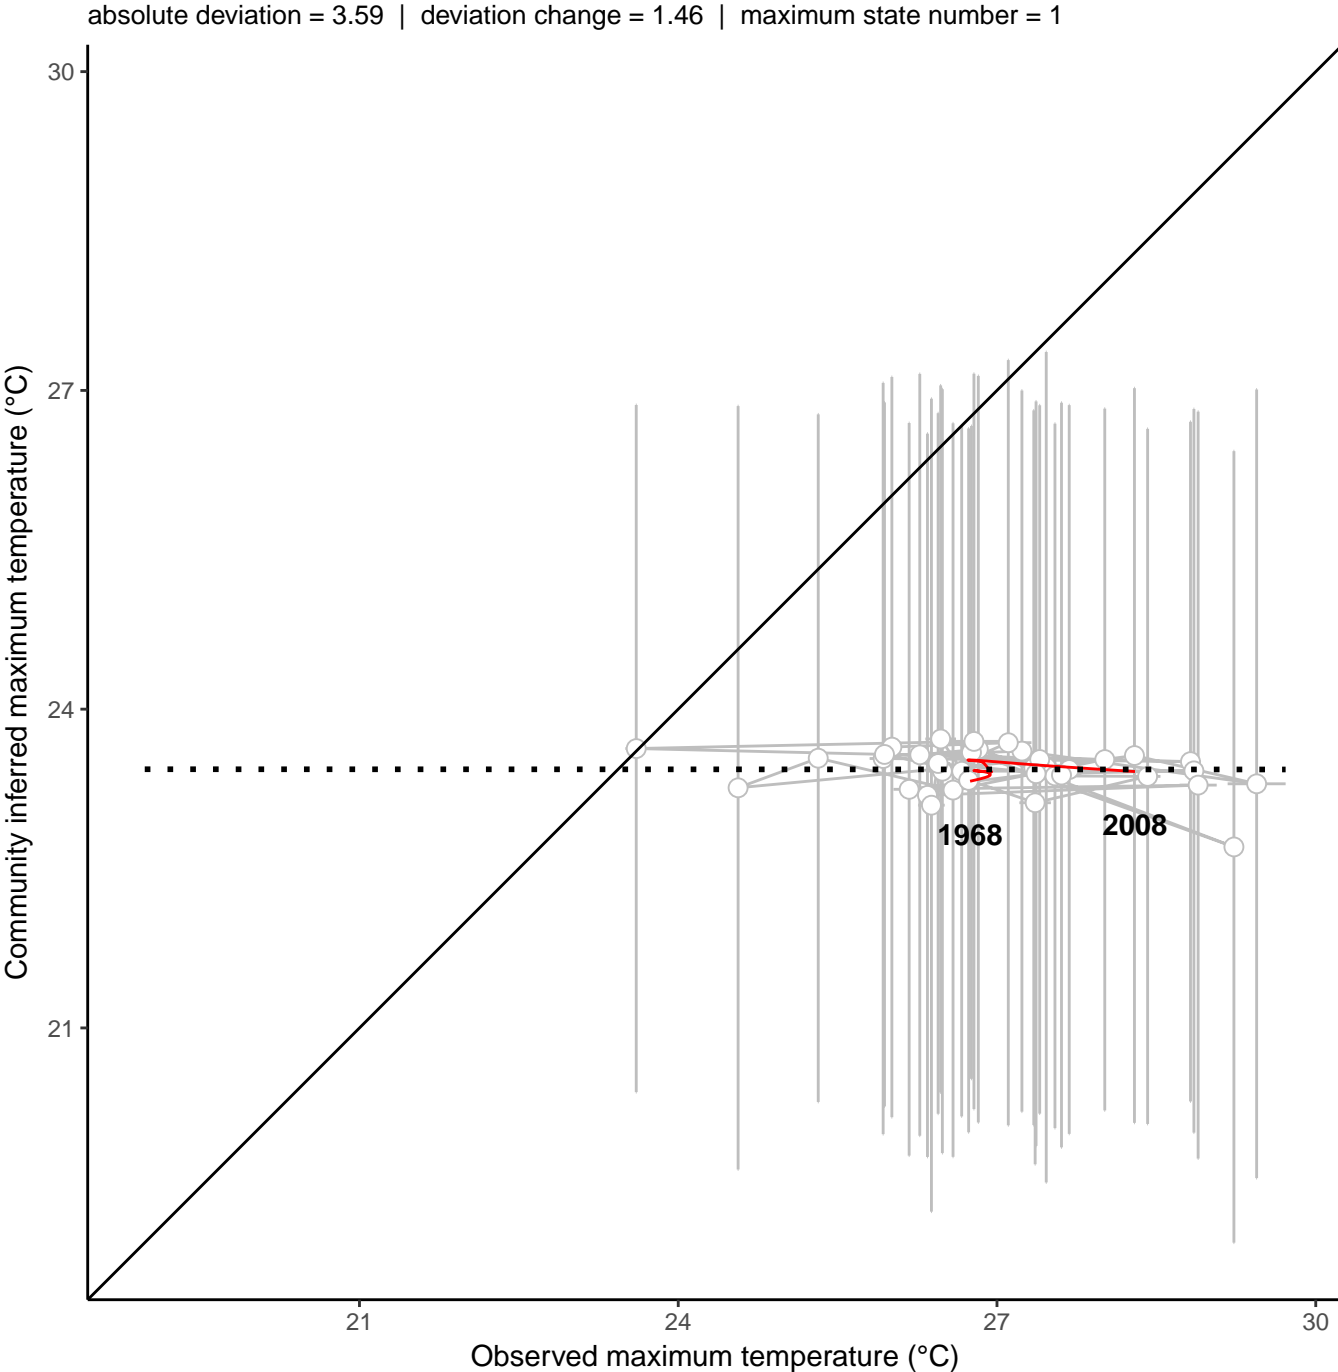

site : 840\_34\_12

absolute deviation = 3.17 | deviation change = 0.61 | maximum state number = 1

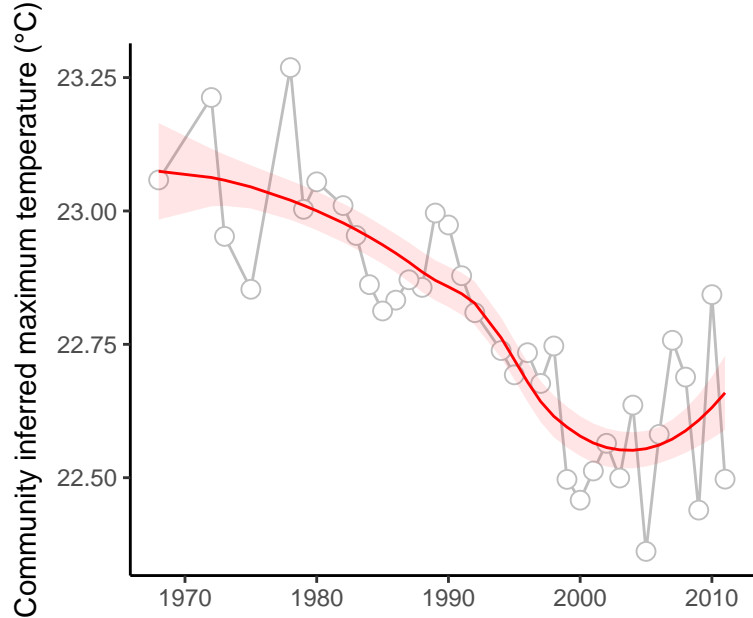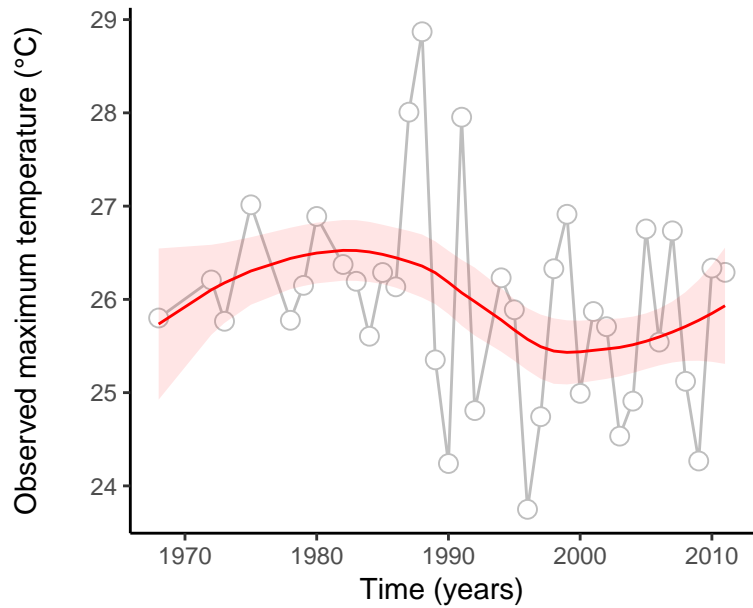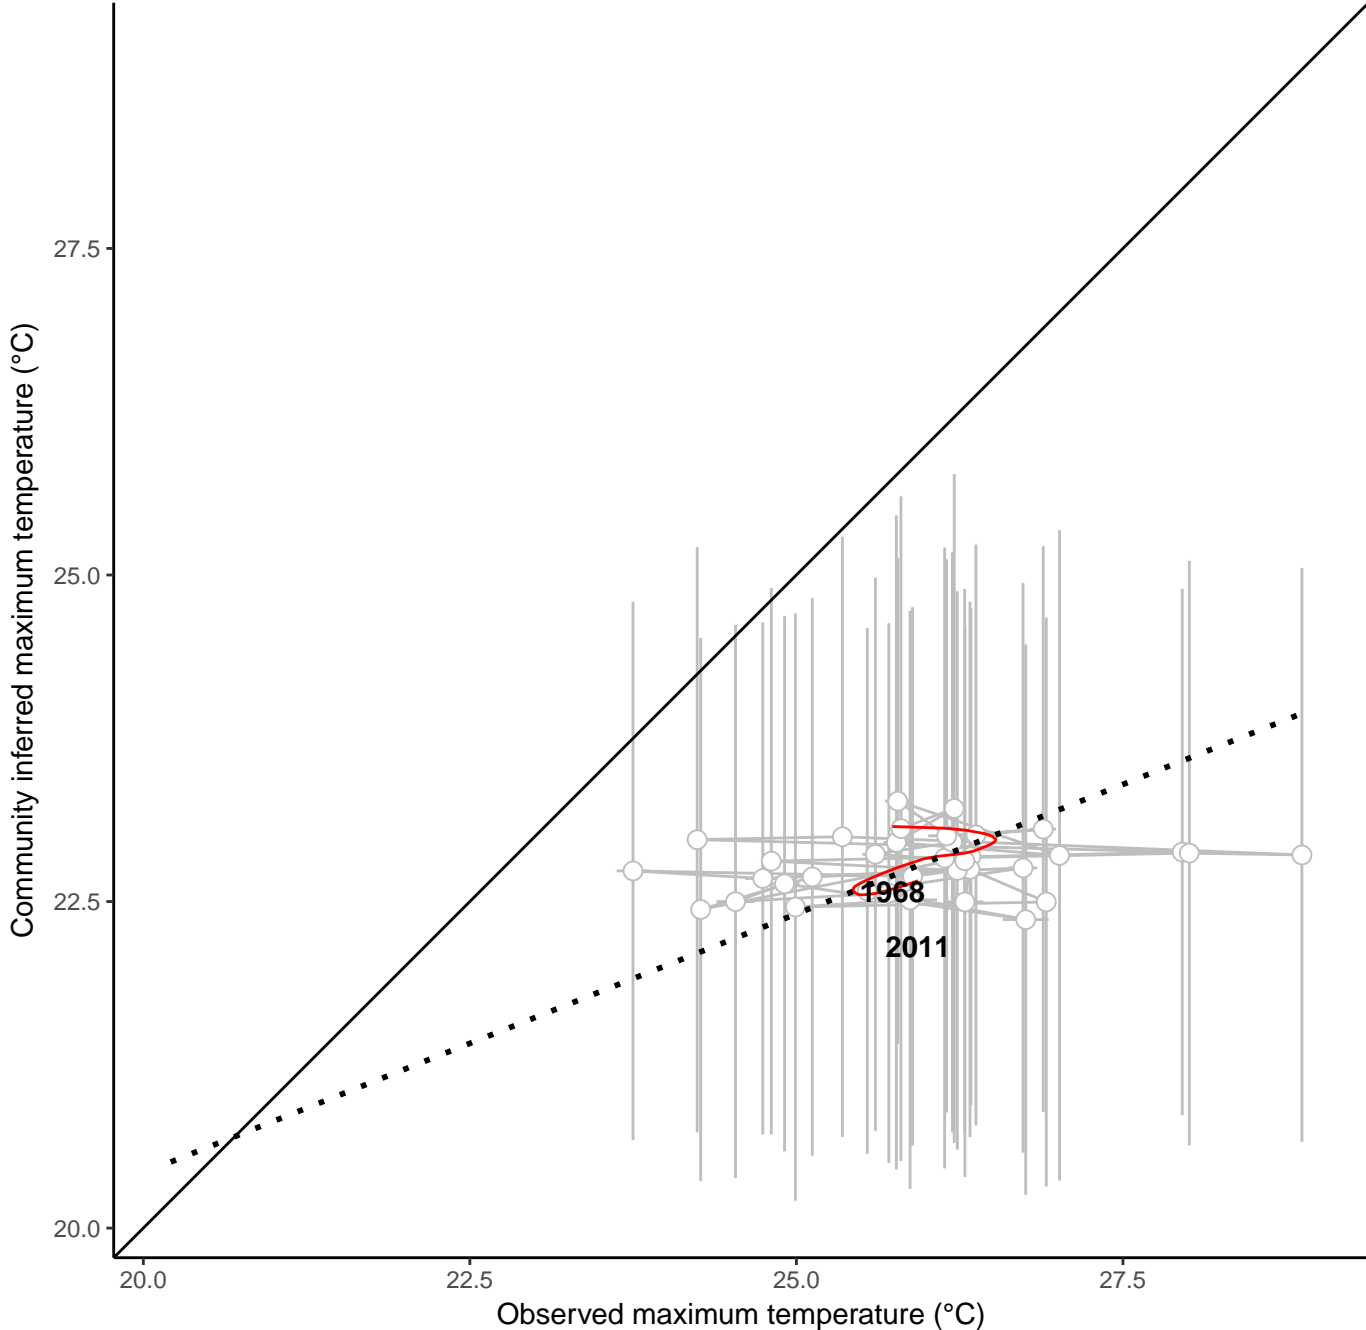

site : 840\_36\_26

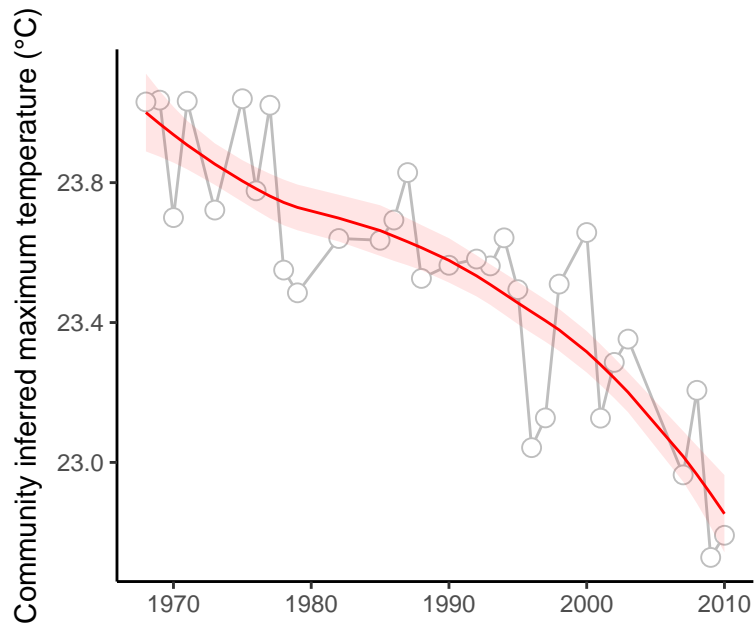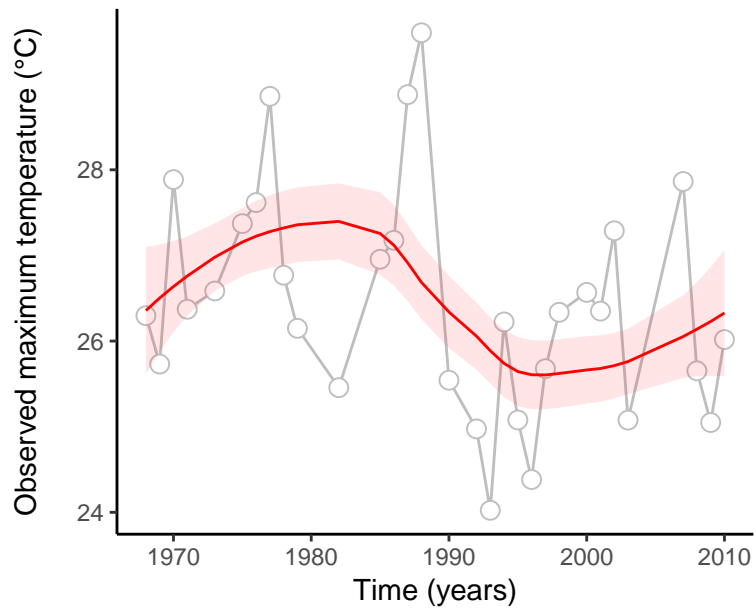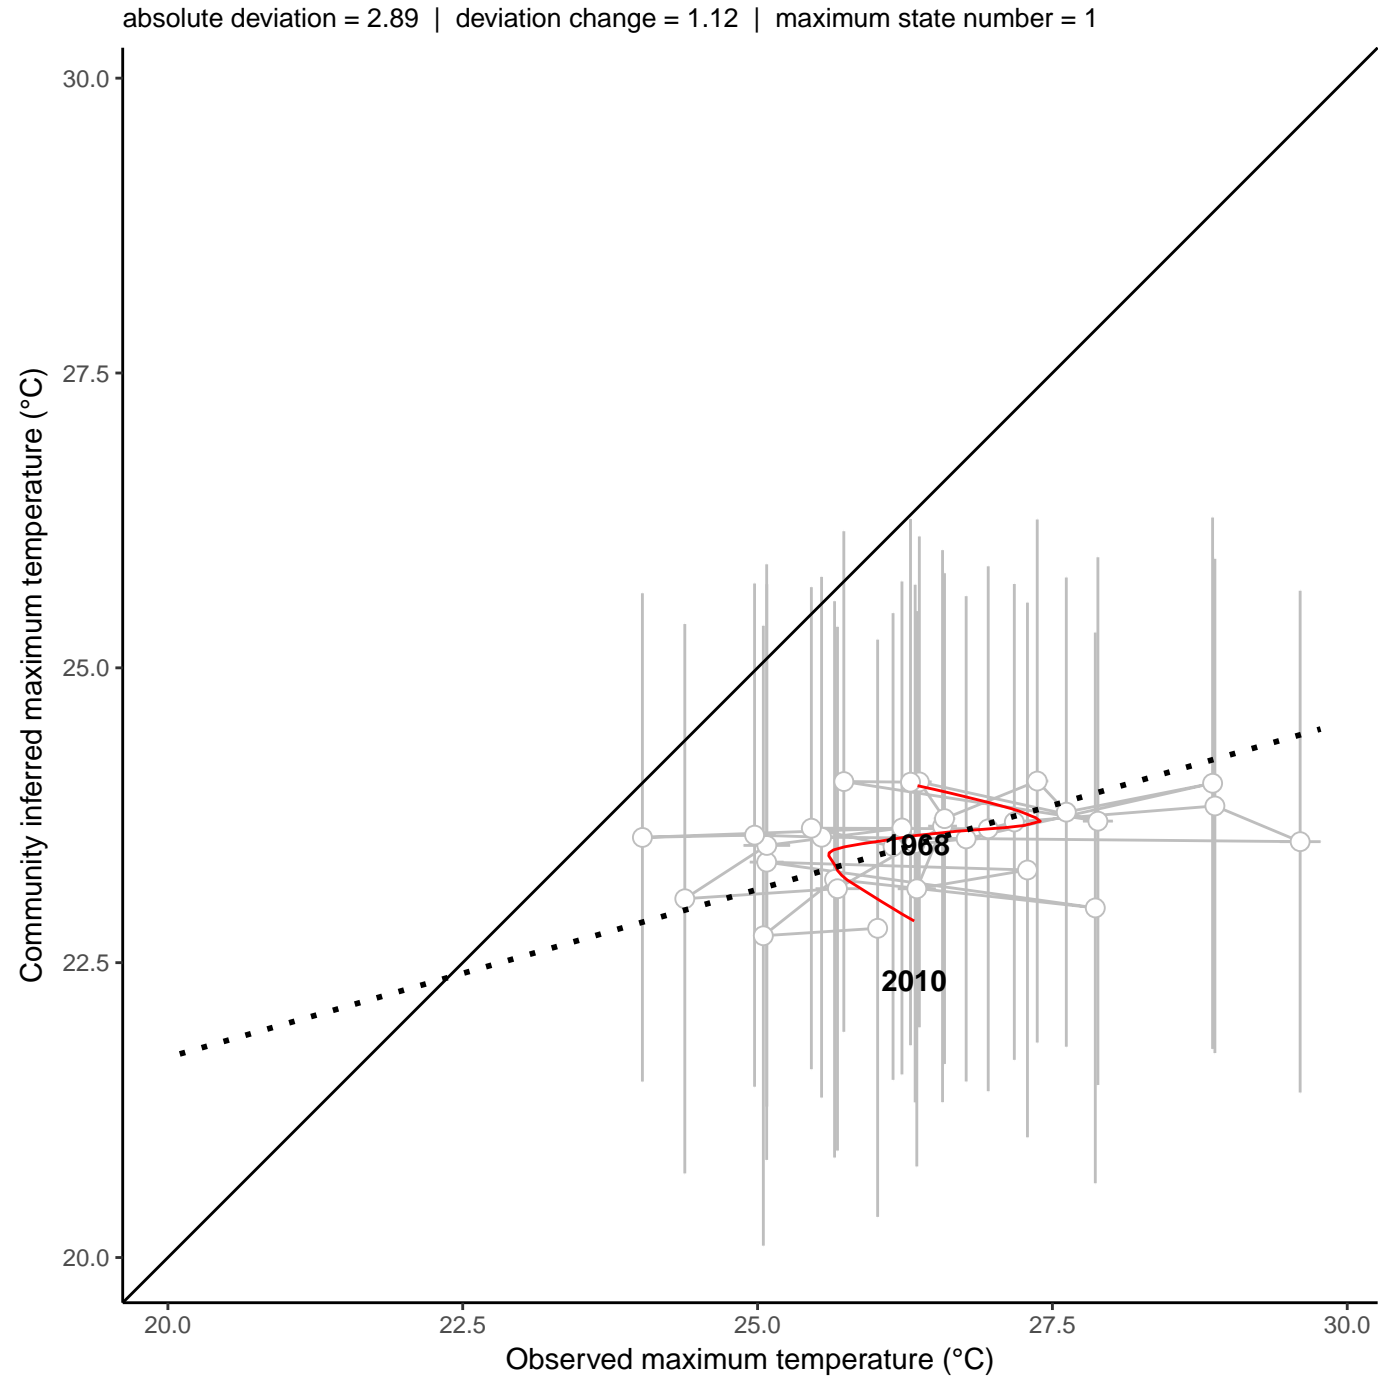

site : 840\_36\_29

absolute deviation = 1.7 | deviation change = 1.75 | maximum state number = 1

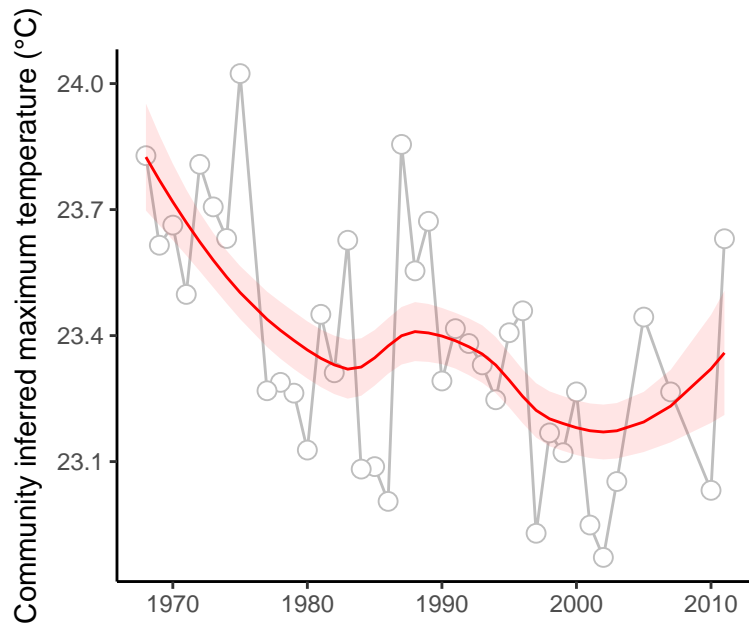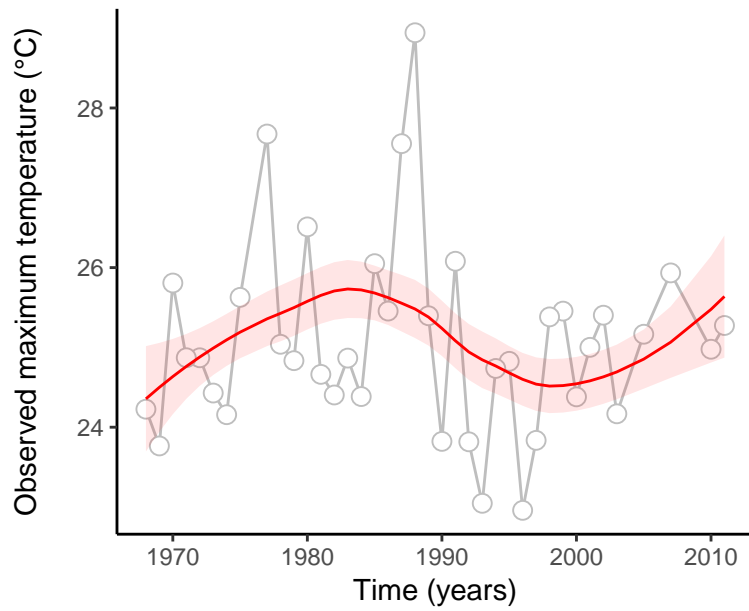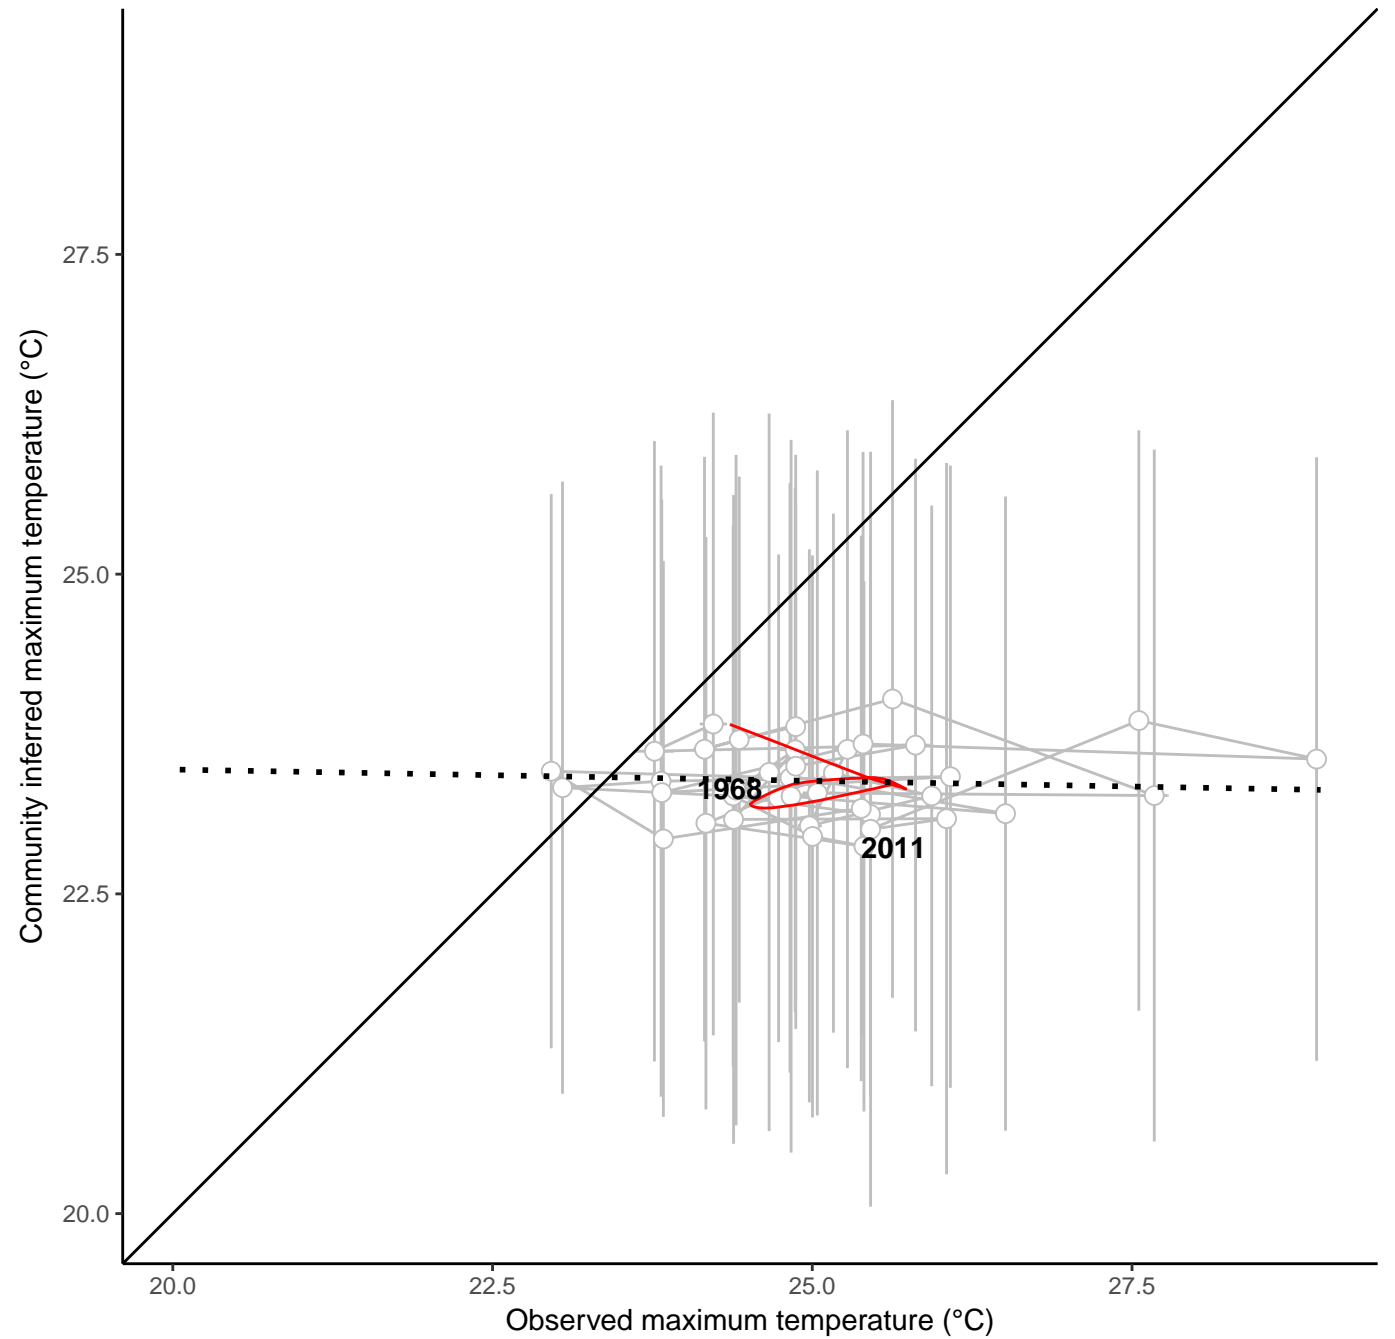

site : 840\_36\_7

absolute deviation = 2.98 | deviation change = 0.88 | maximum state number = 1

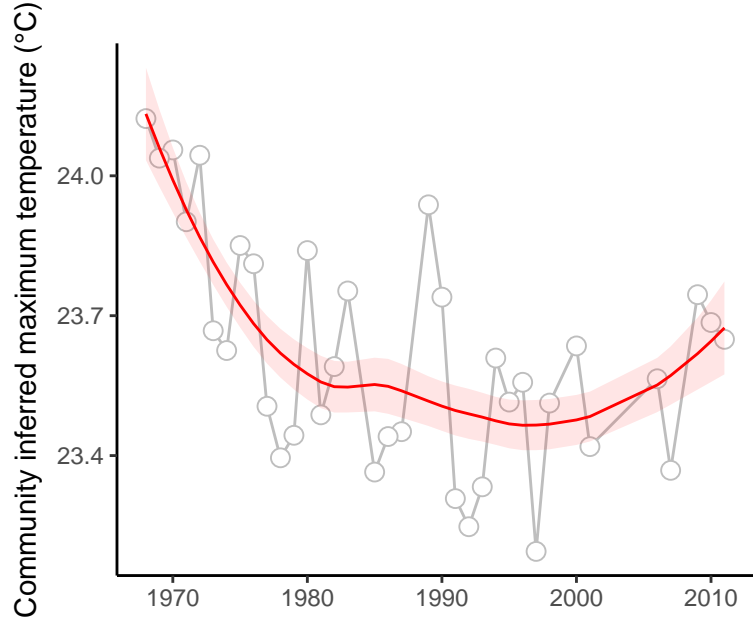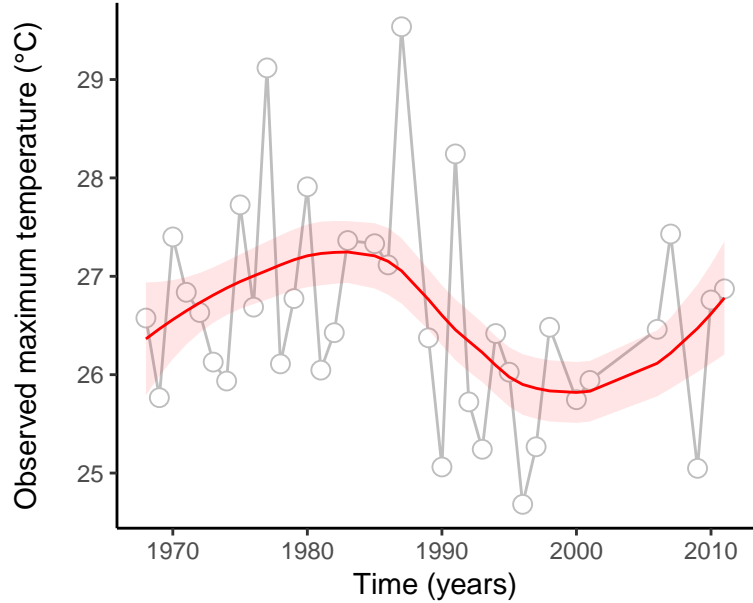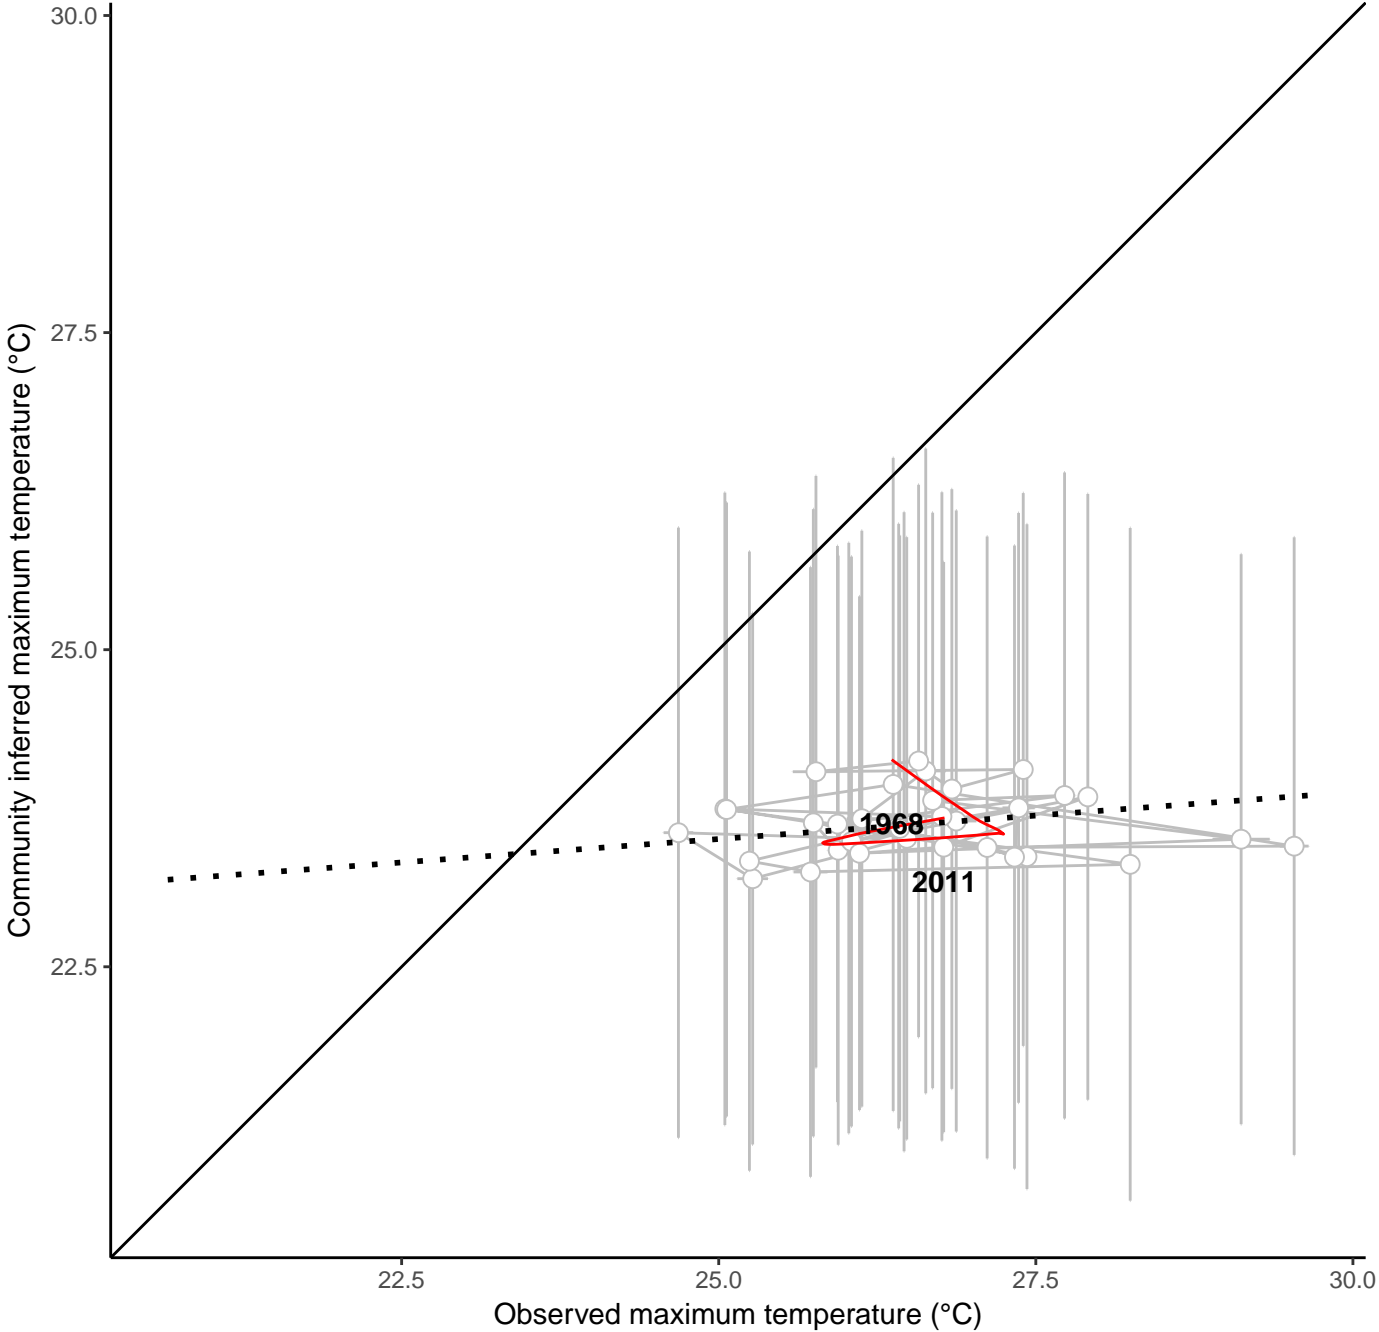

site : 840\_38\_27

absolute deviation = 3.15 | deviation change = 0.4 | maximum state number = 1

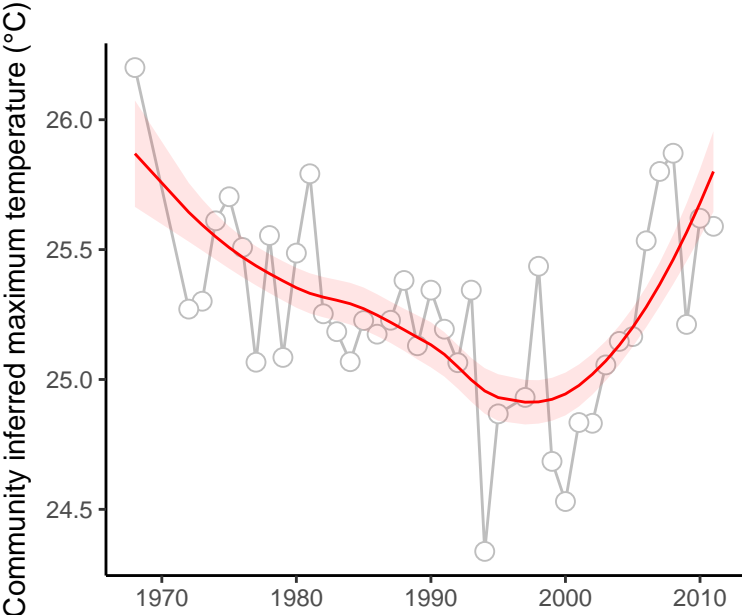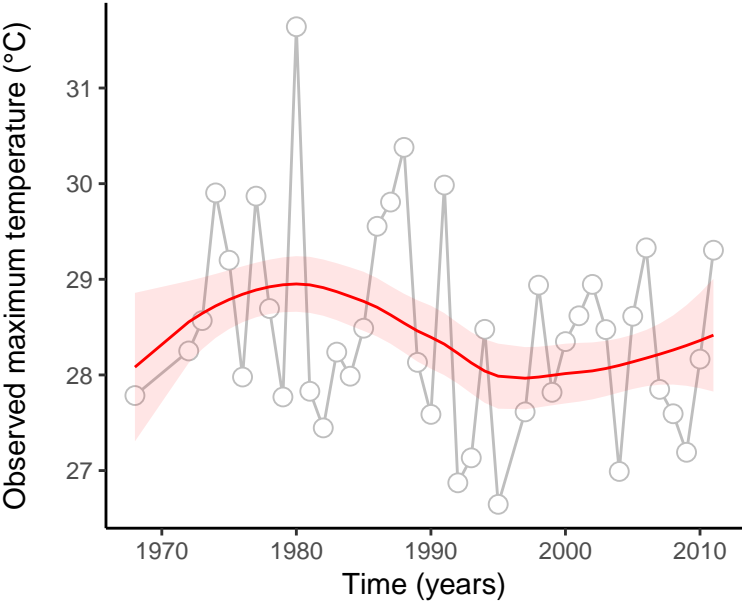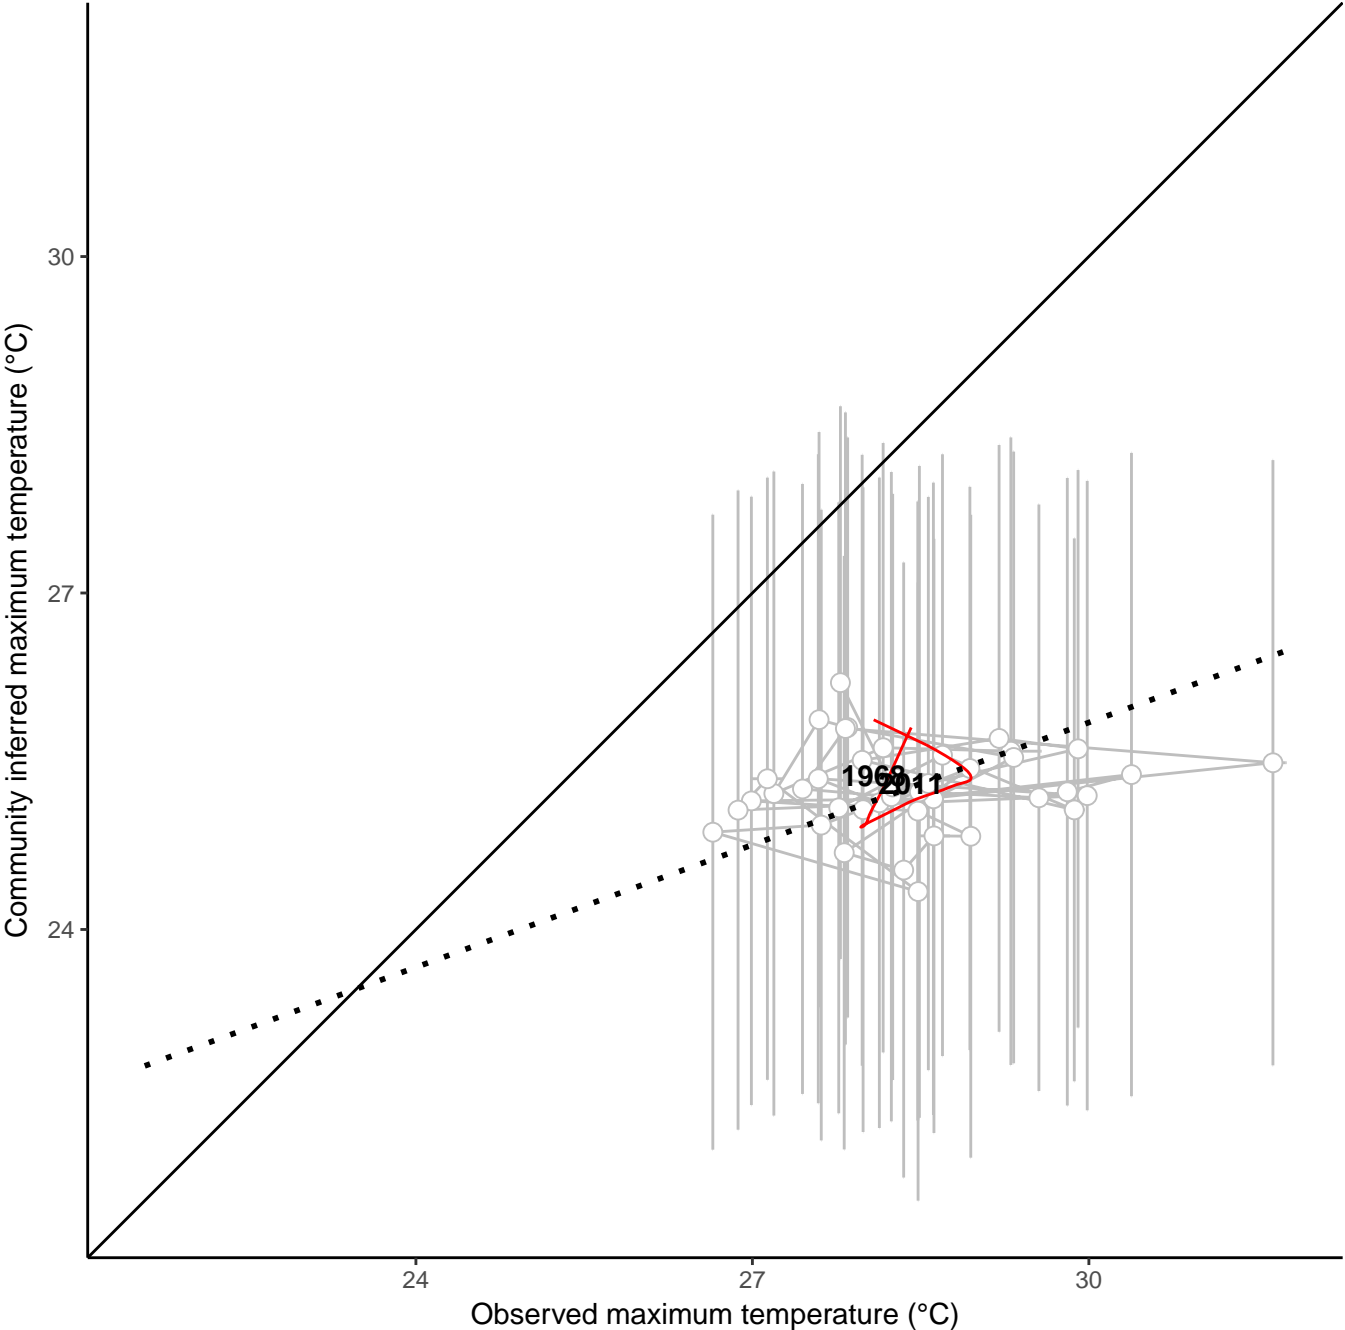

site : 840\_38\_7

absolute deviation = 5.03 | deviation change = 0.37 | maximum state number = 1

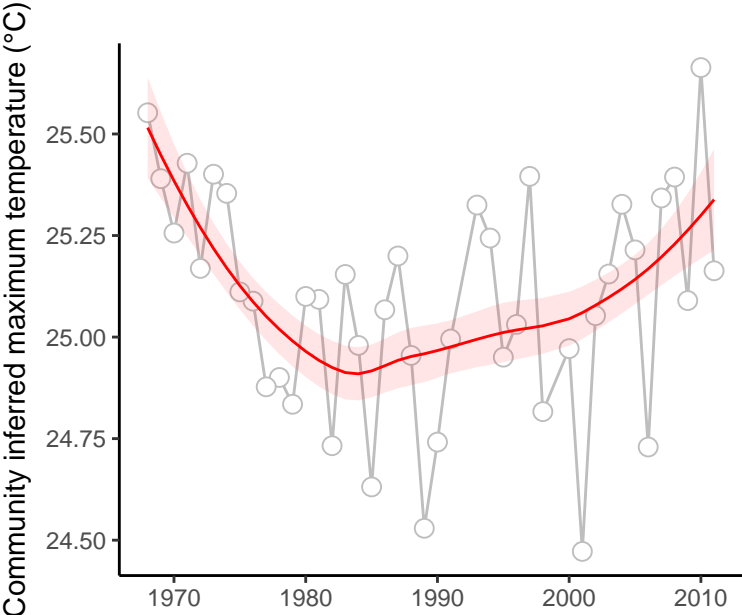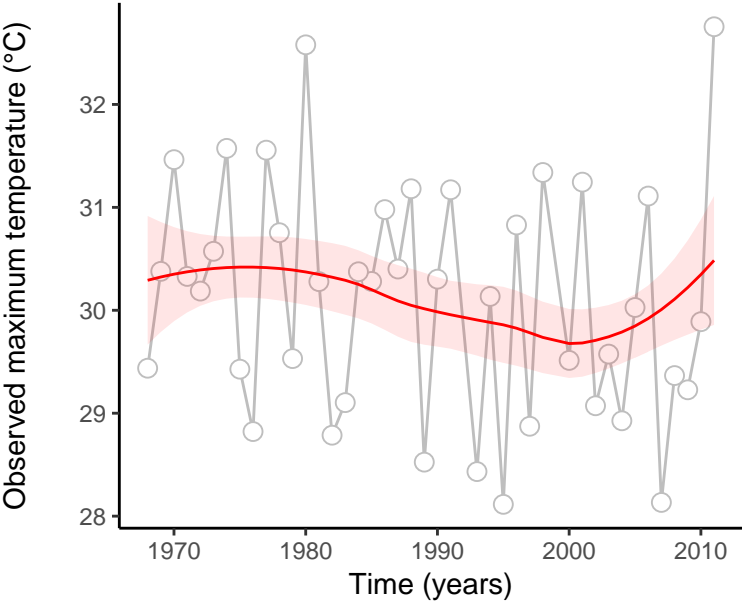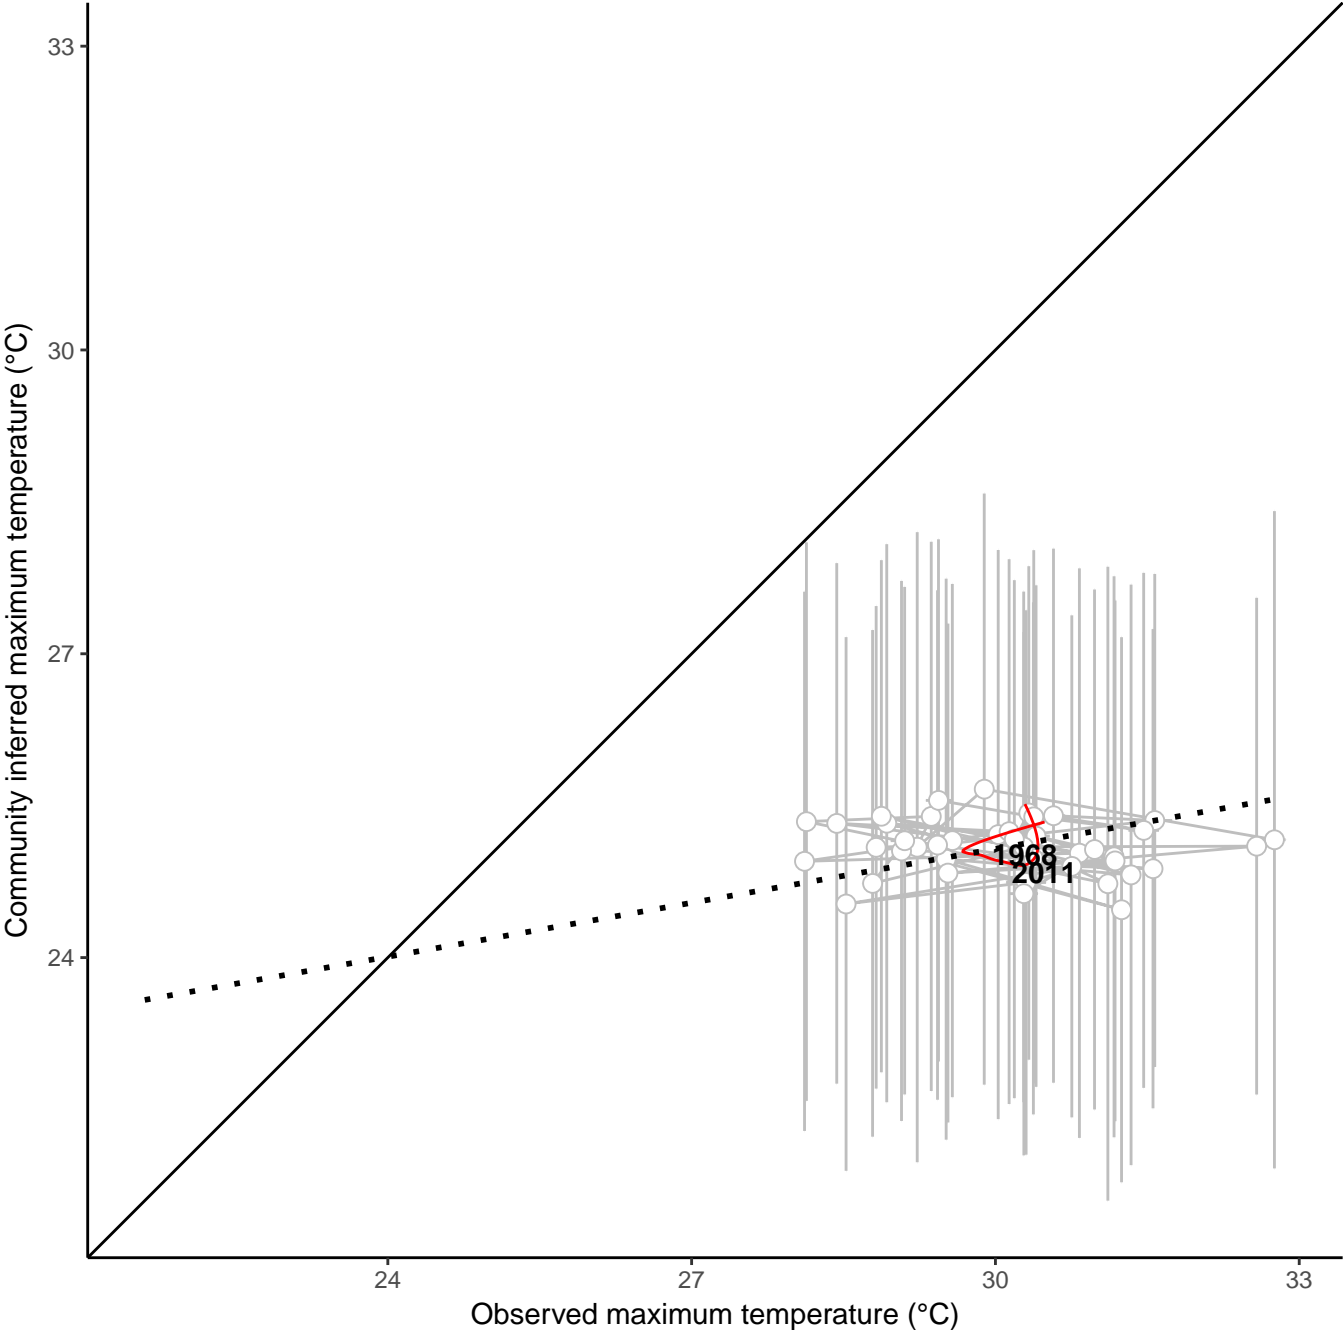



site : 840\_53\_31

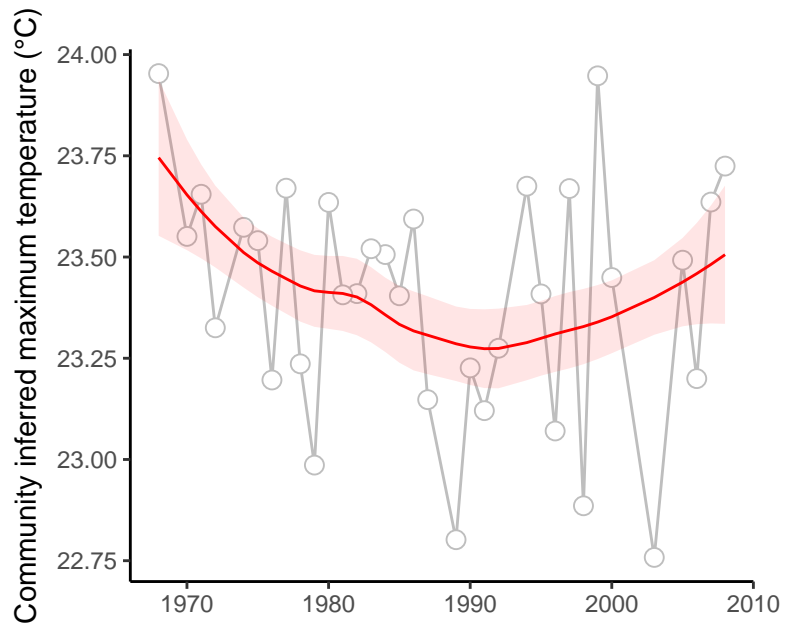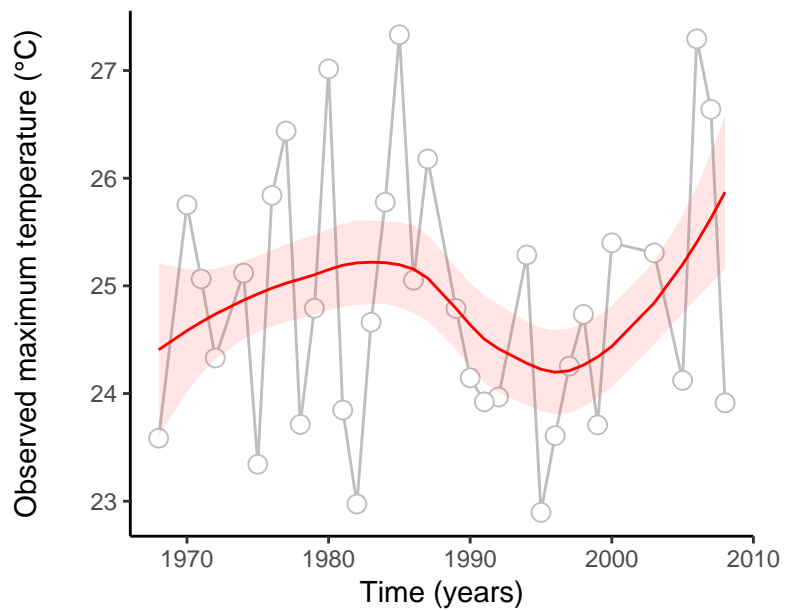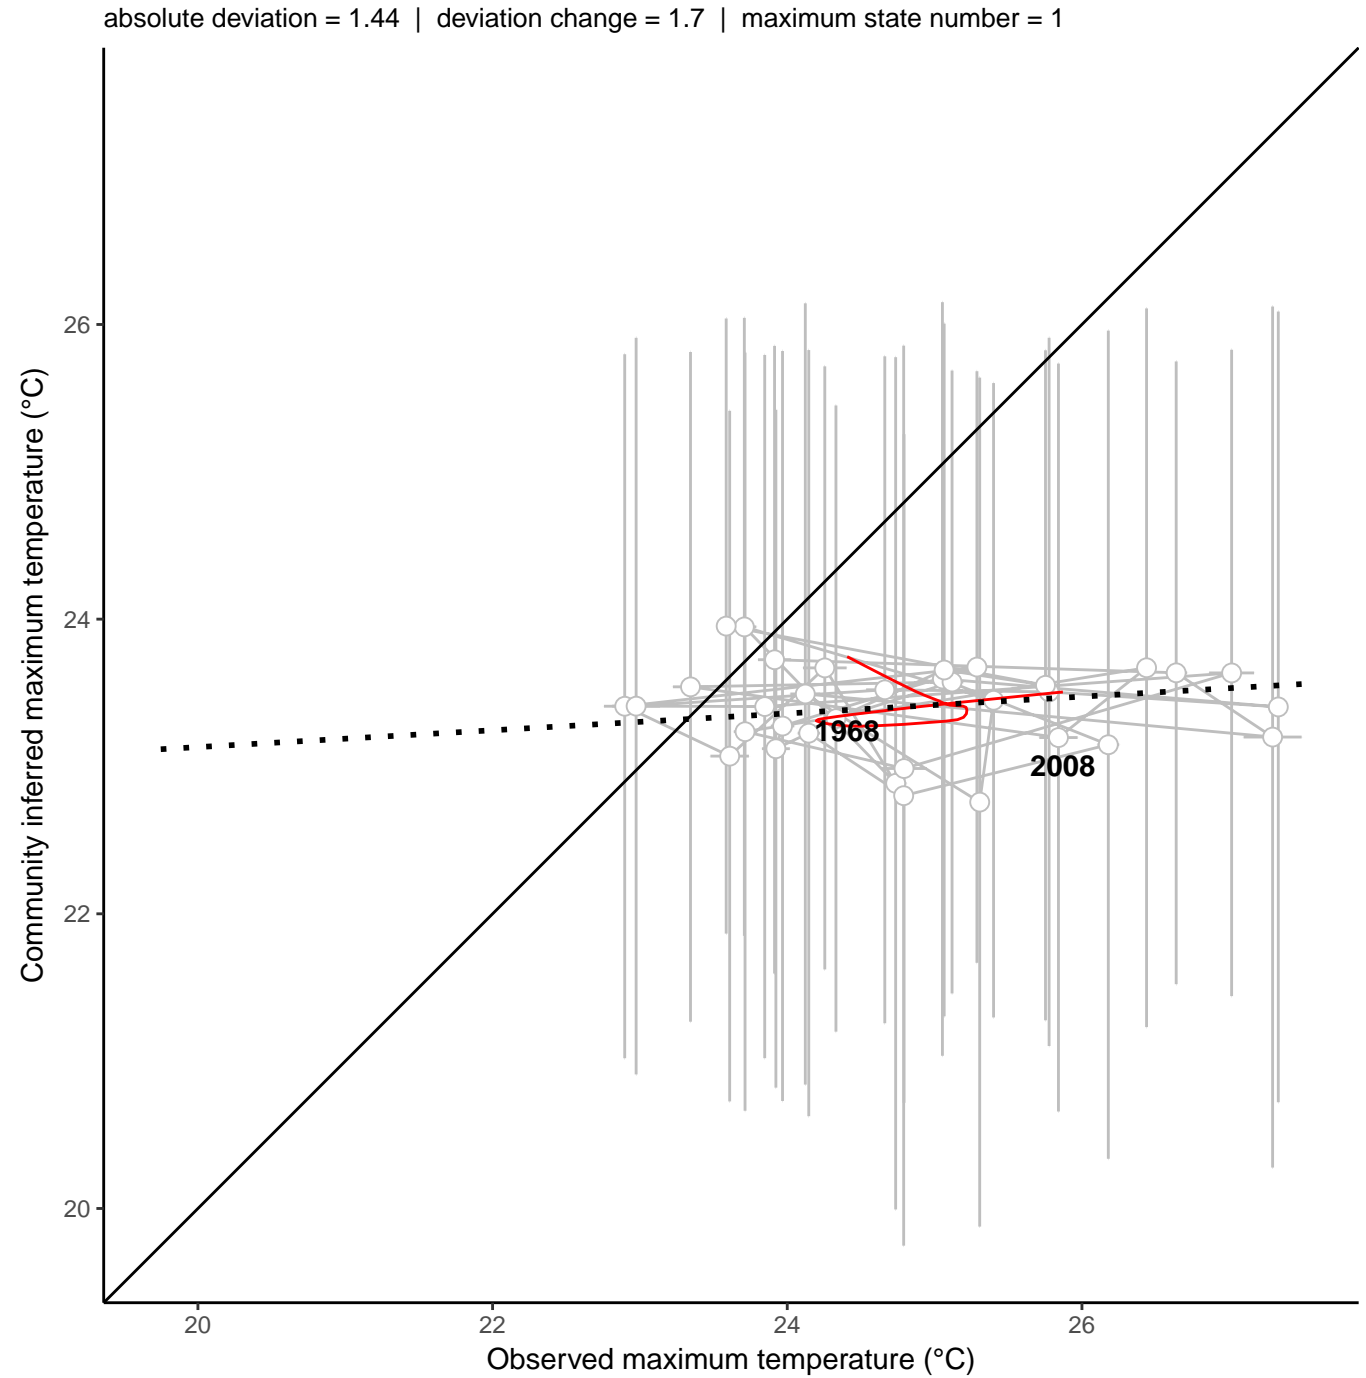

site : 840\_64\_1

absolute deviation = 1.86 | deviation change = 0.24 | maximum state number = 1

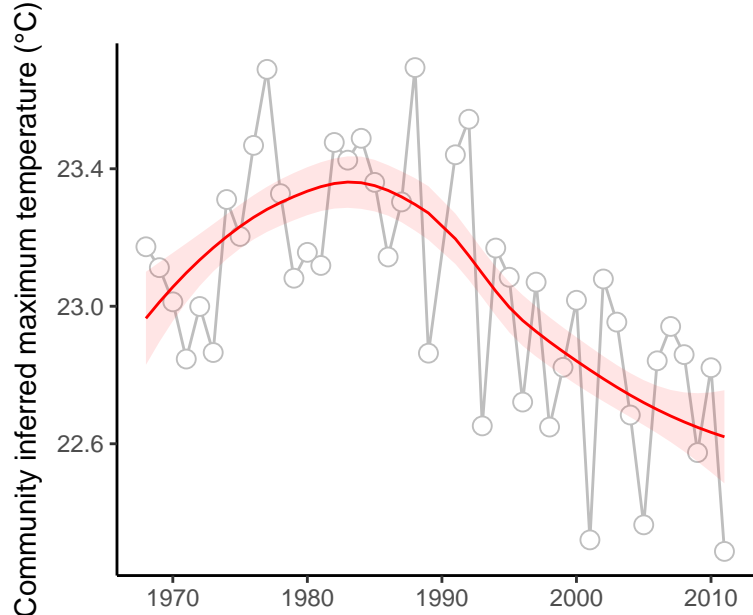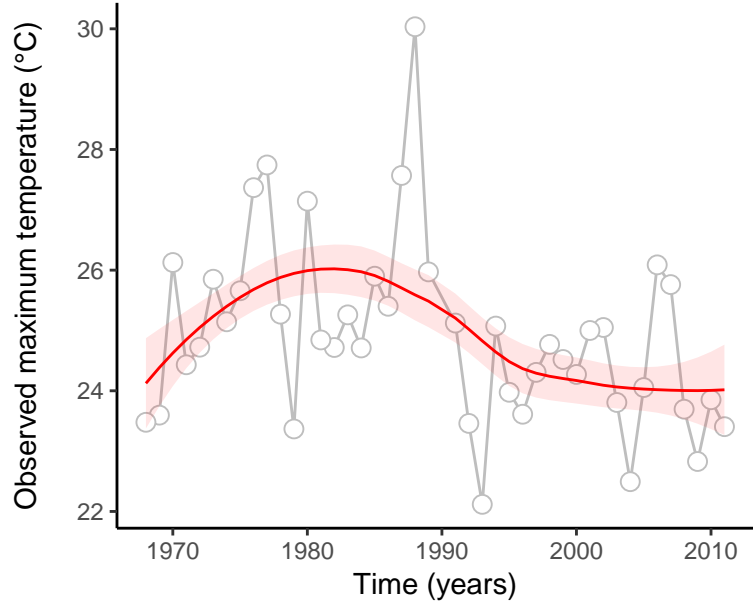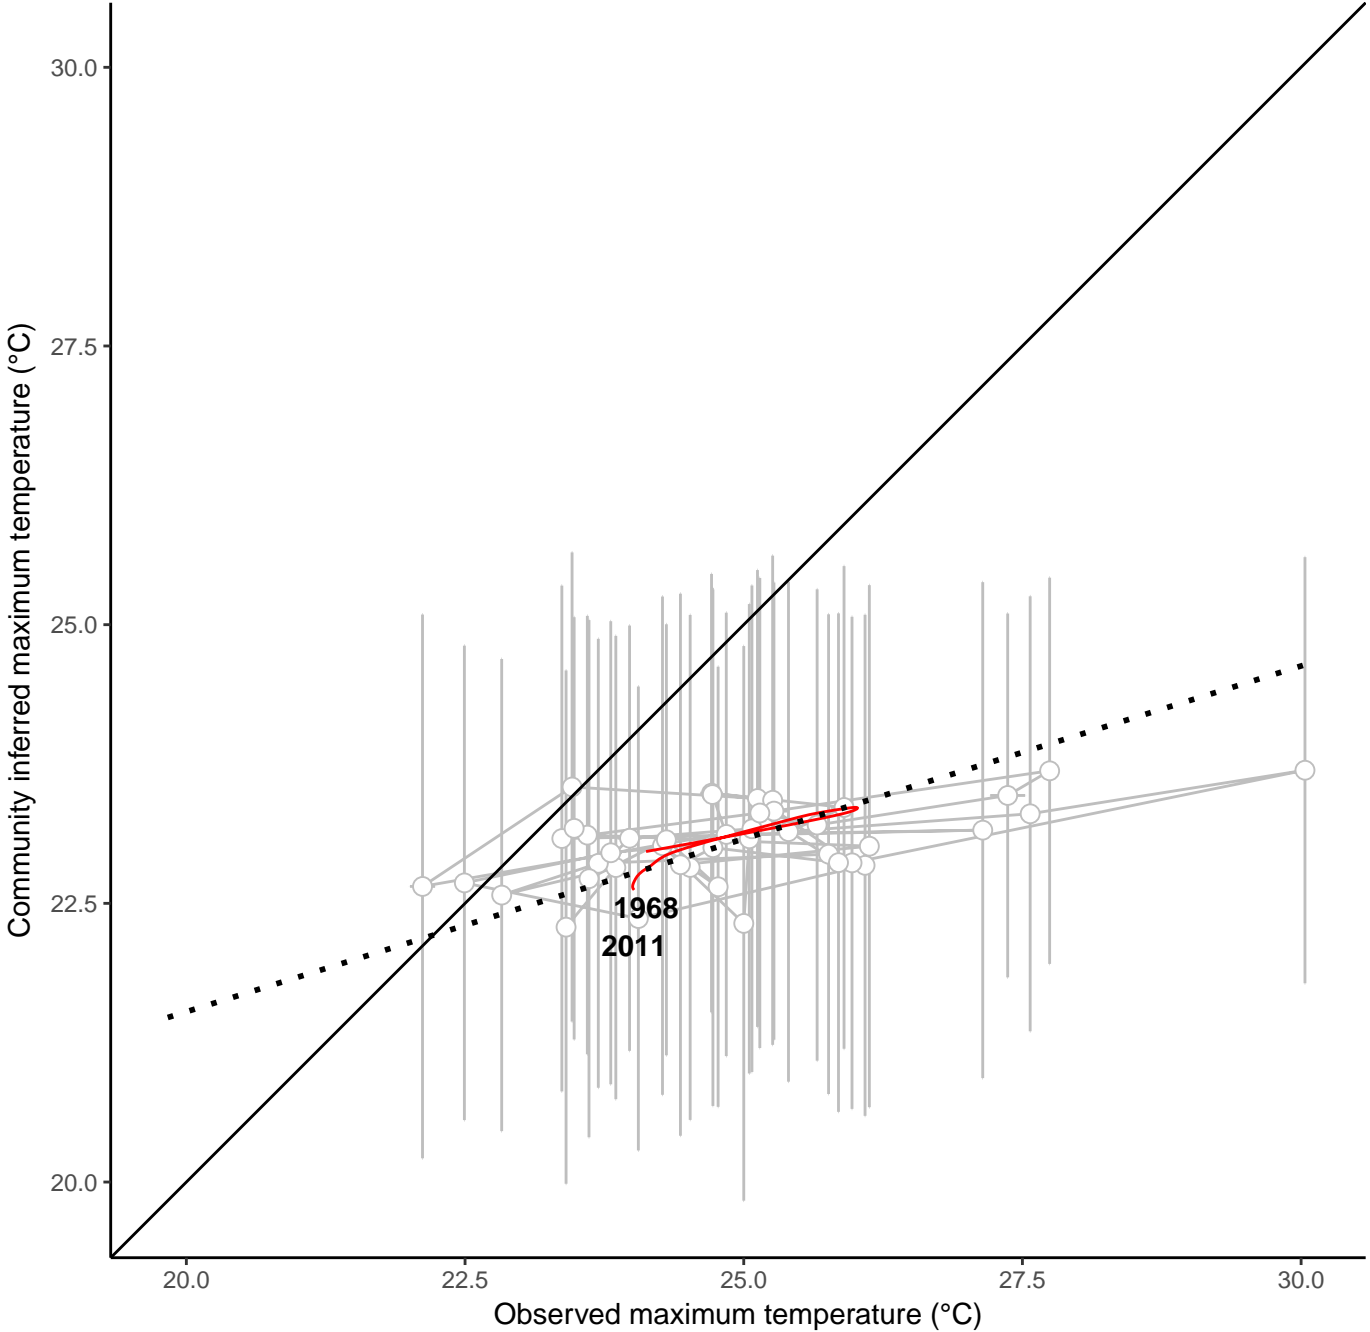

site : 840\_64\_15

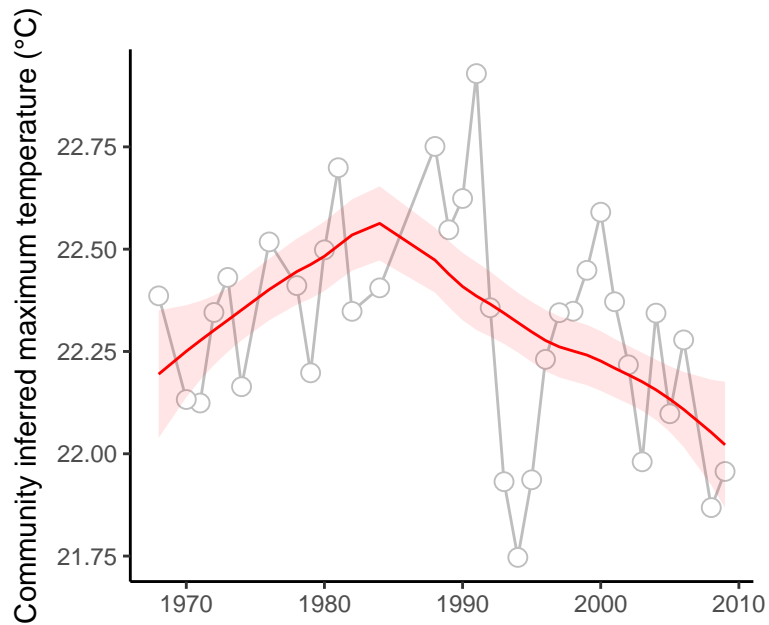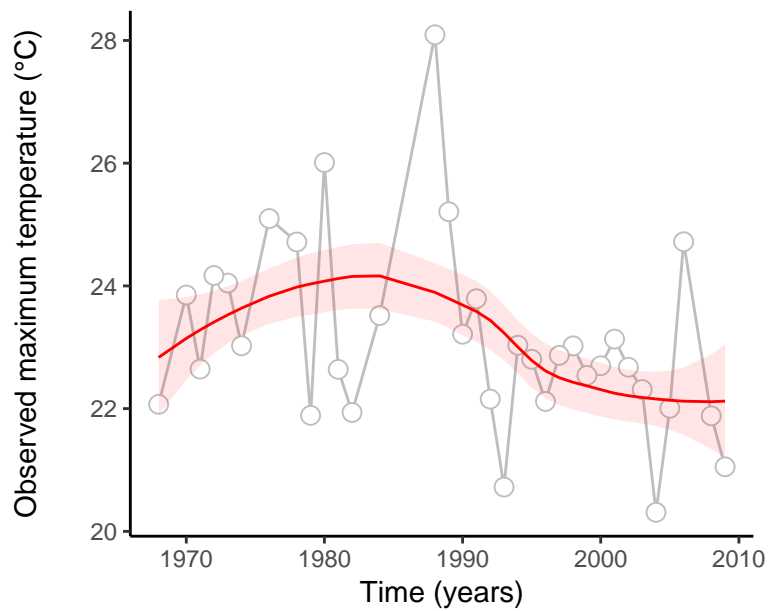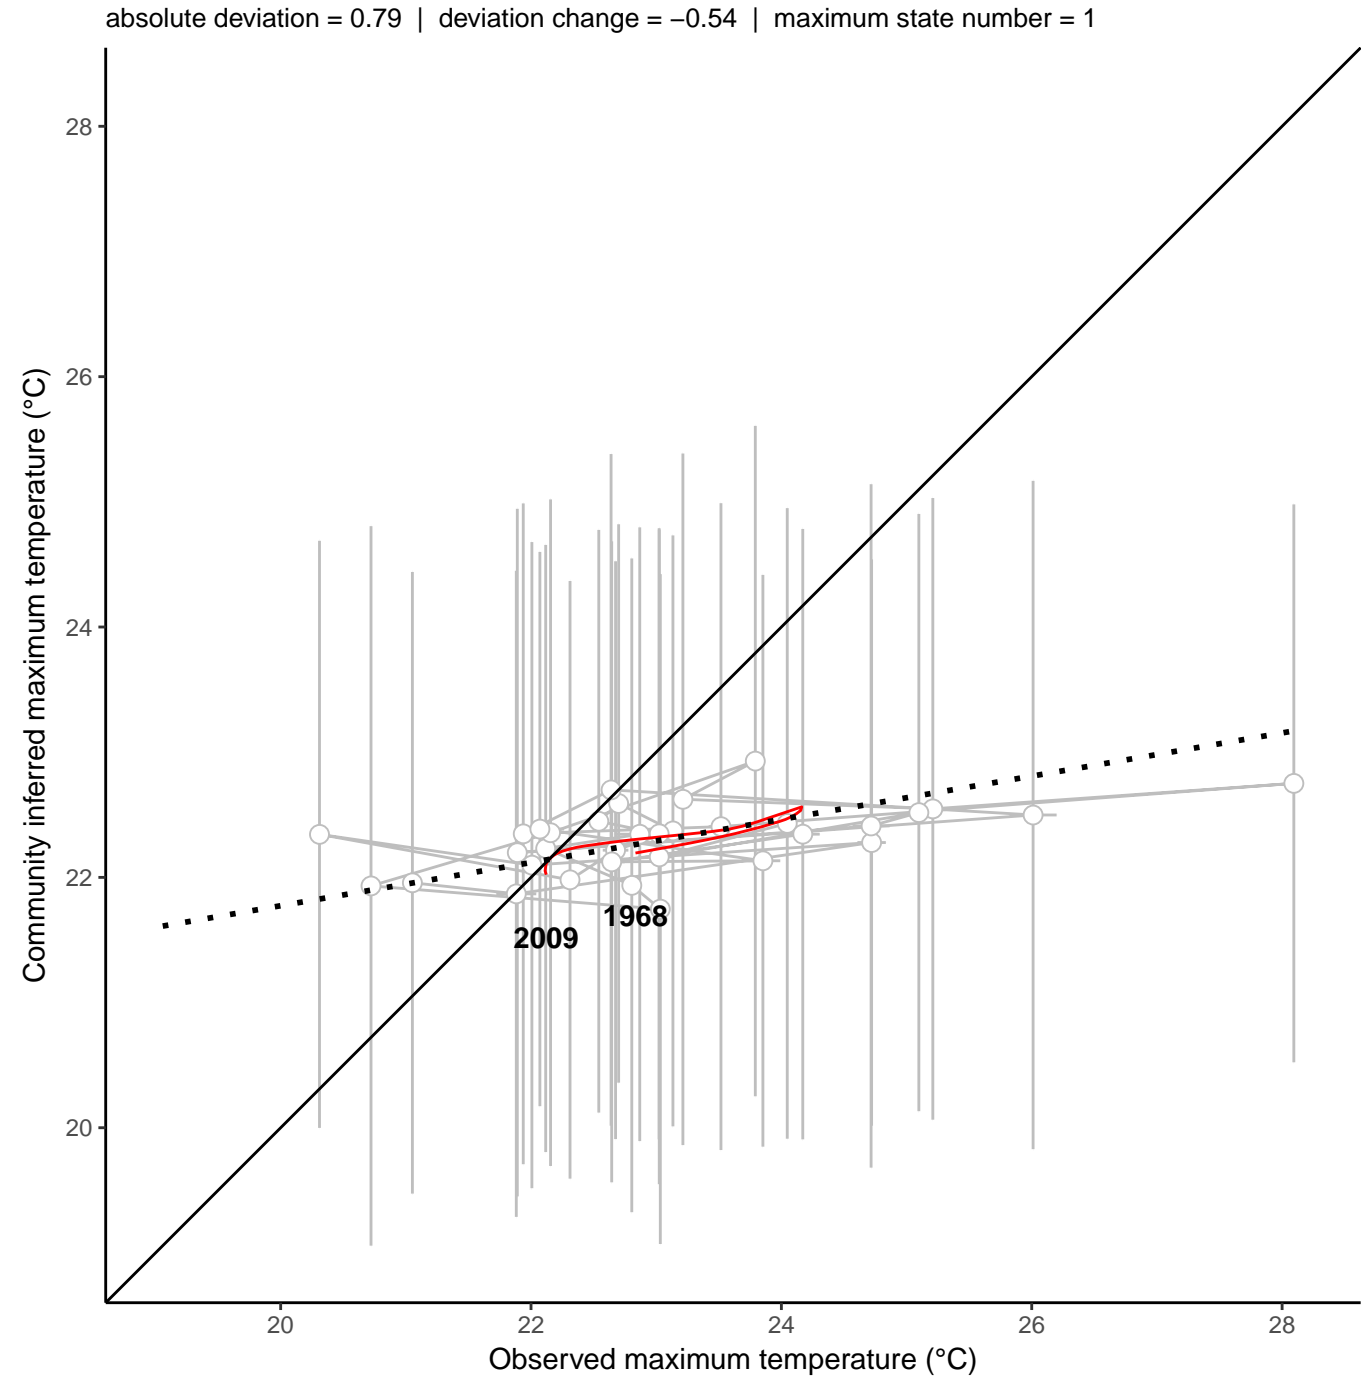

site : 840\_64\_19

absolute deviation = 0.79 | deviation change = 0.05 | maximum state number = 1

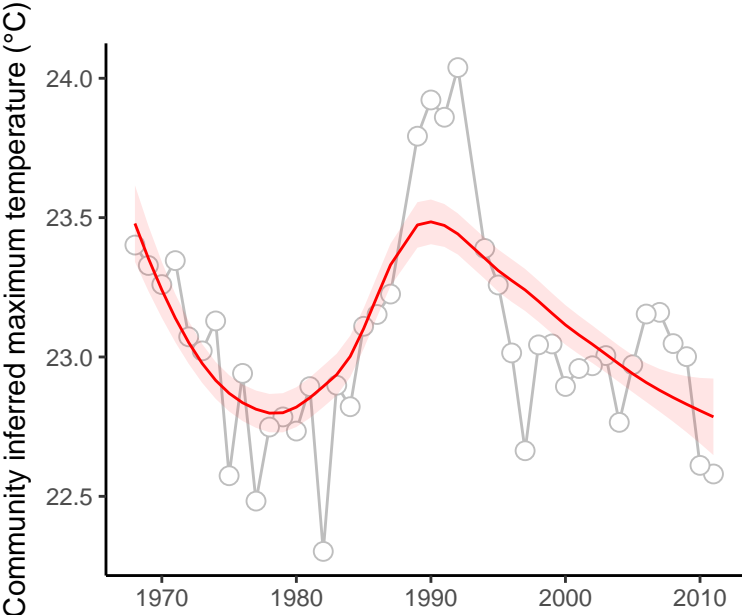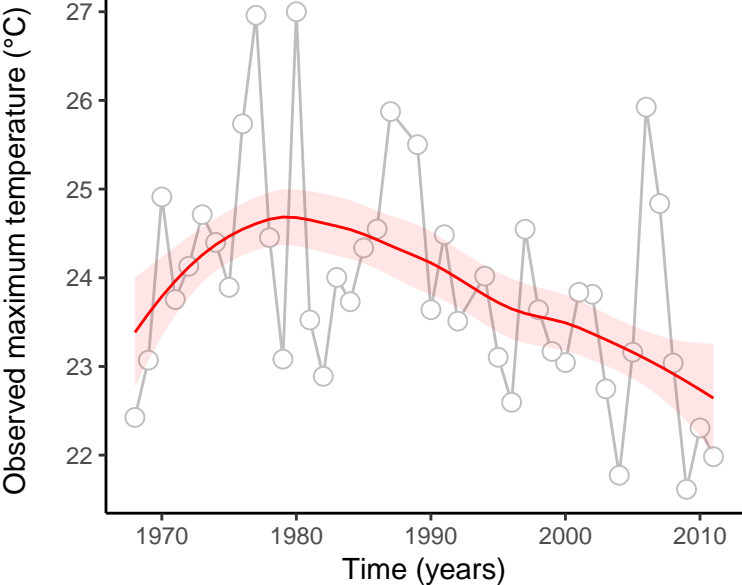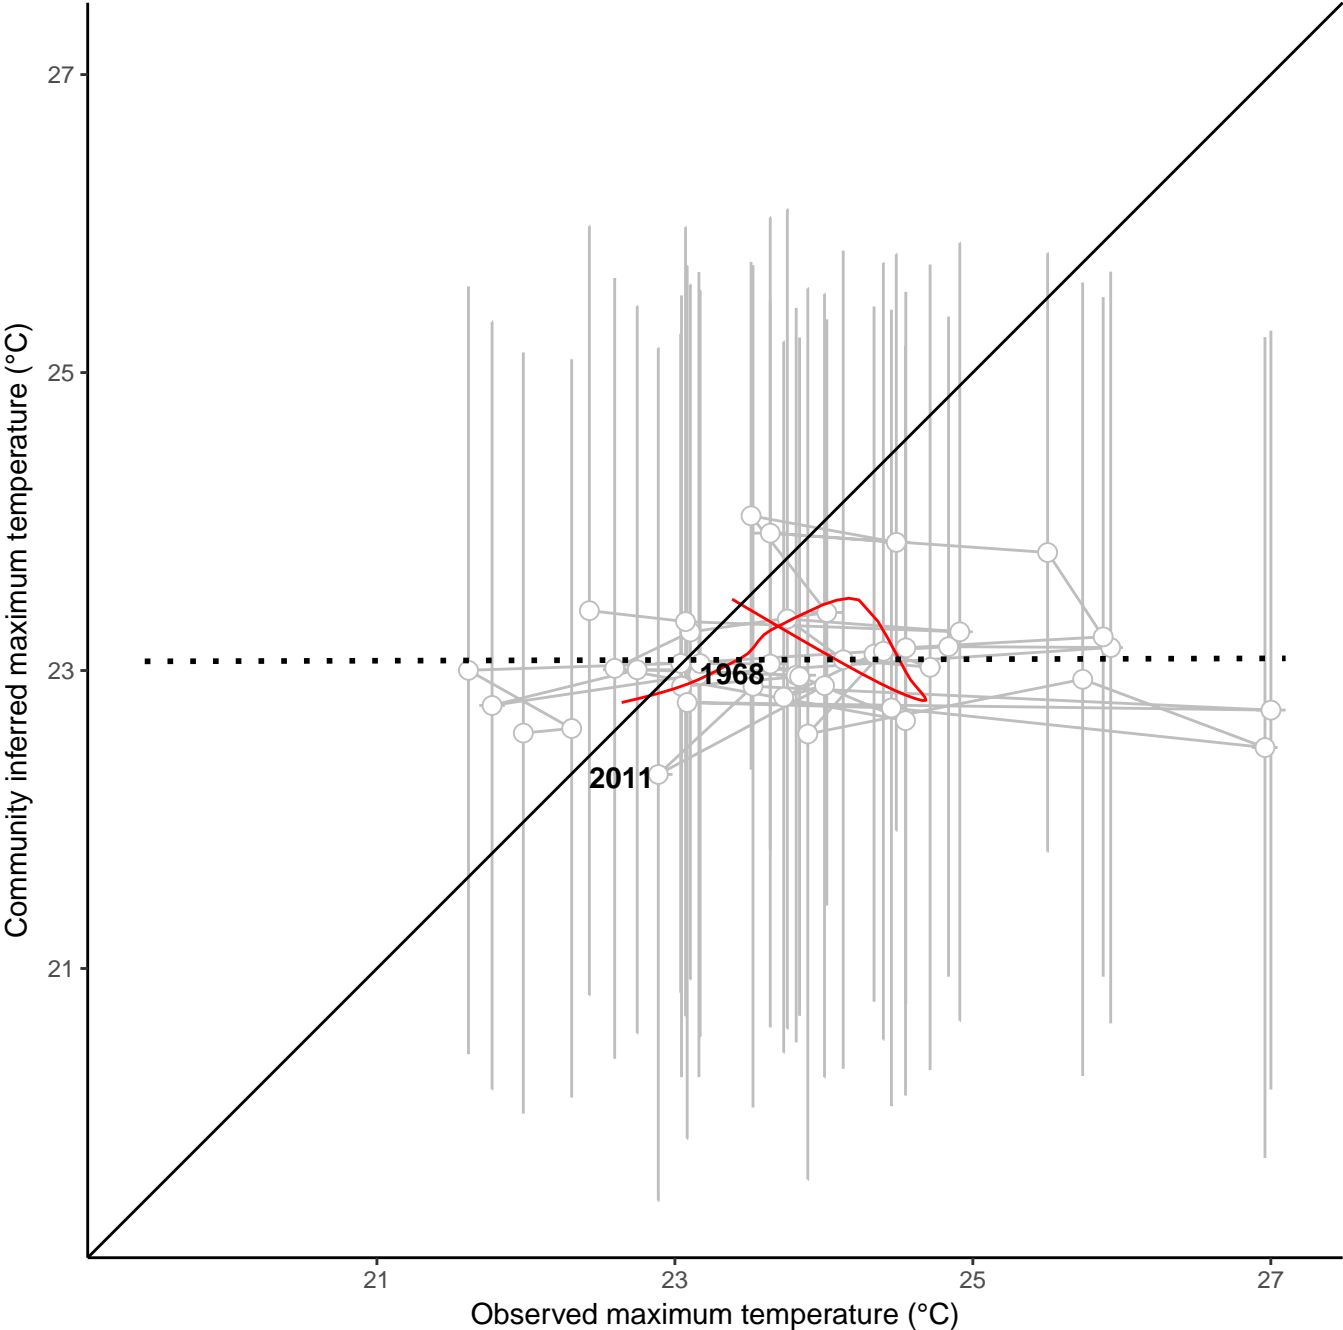

site : 840\_64\_32

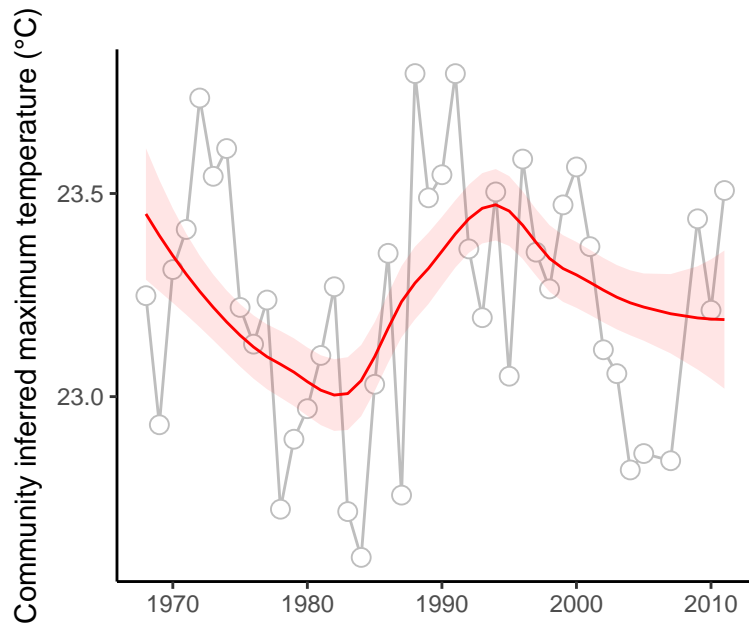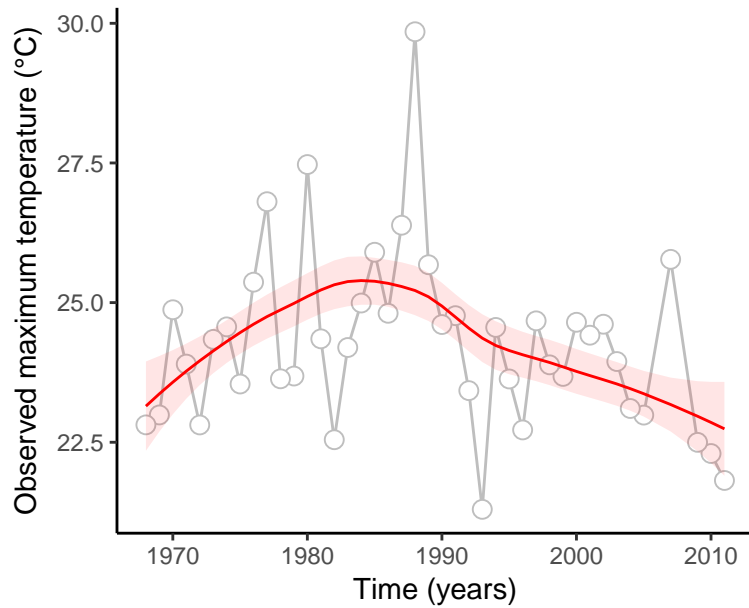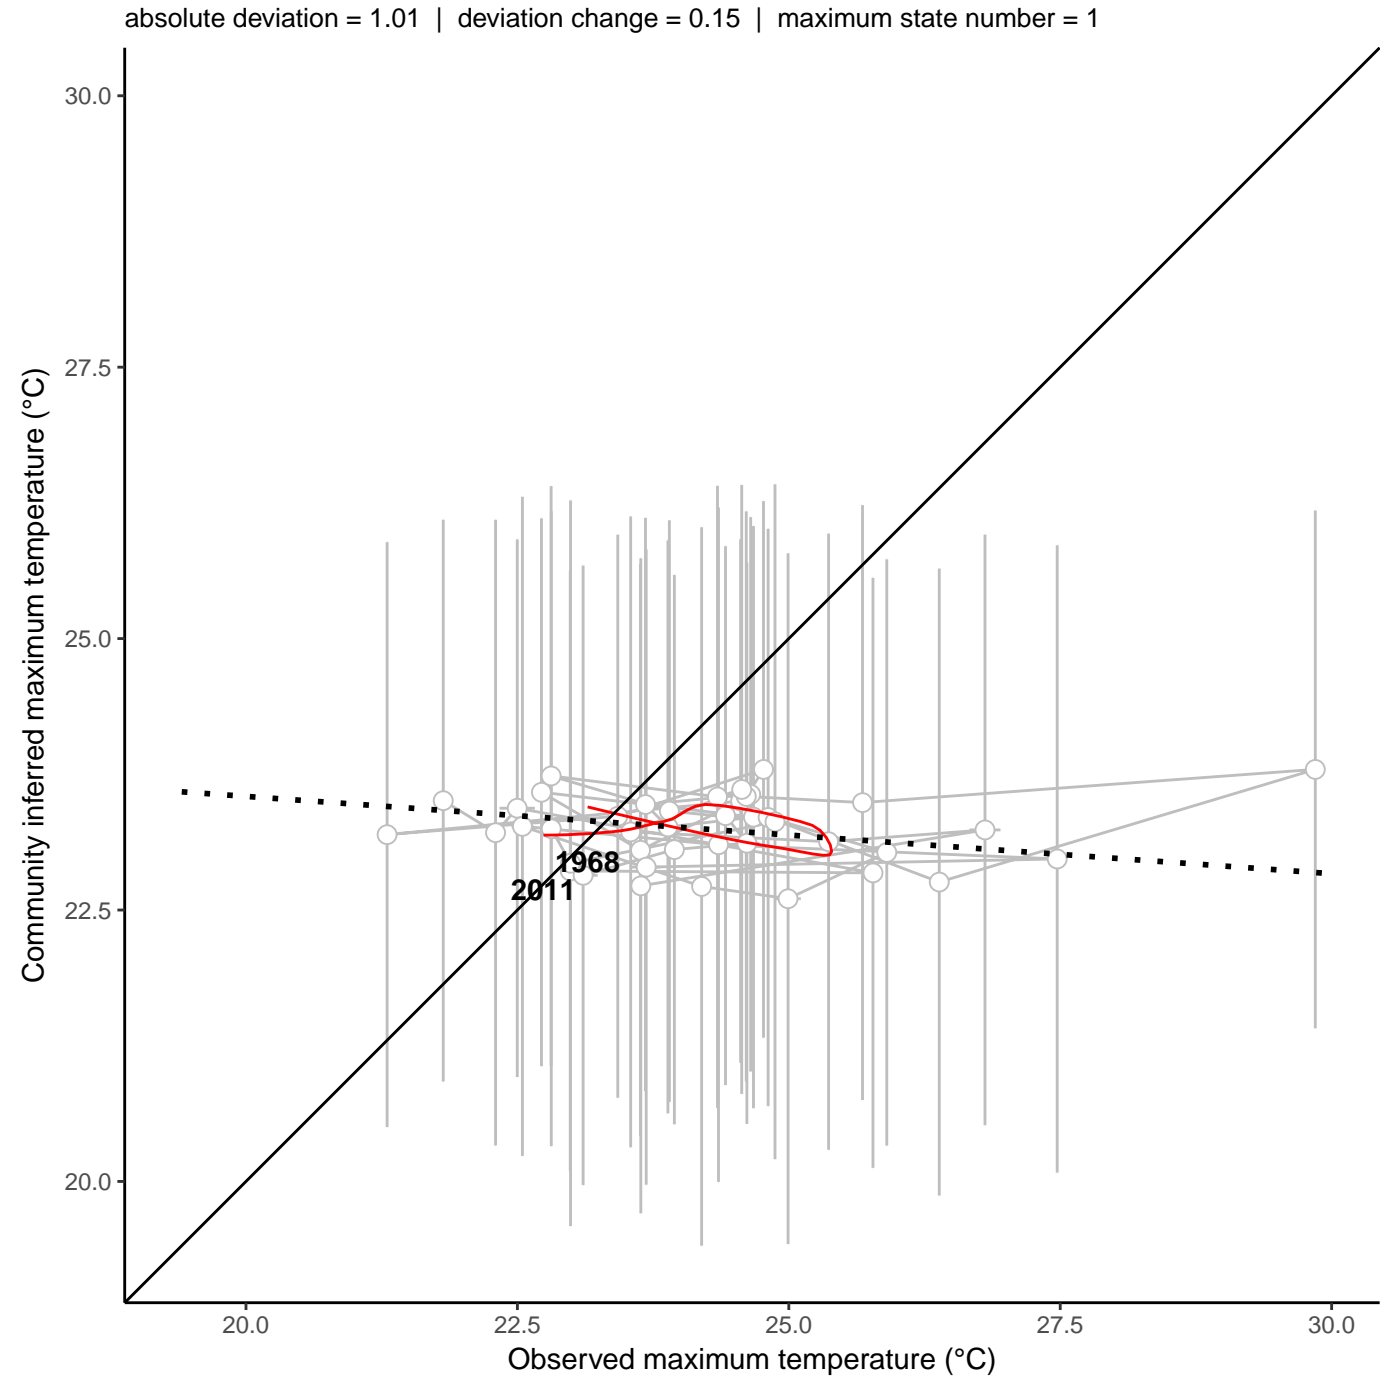

site : 840\_64\_34

absolute deviation = 1.66 | deviation change = 2.28 | maximum state number = 1

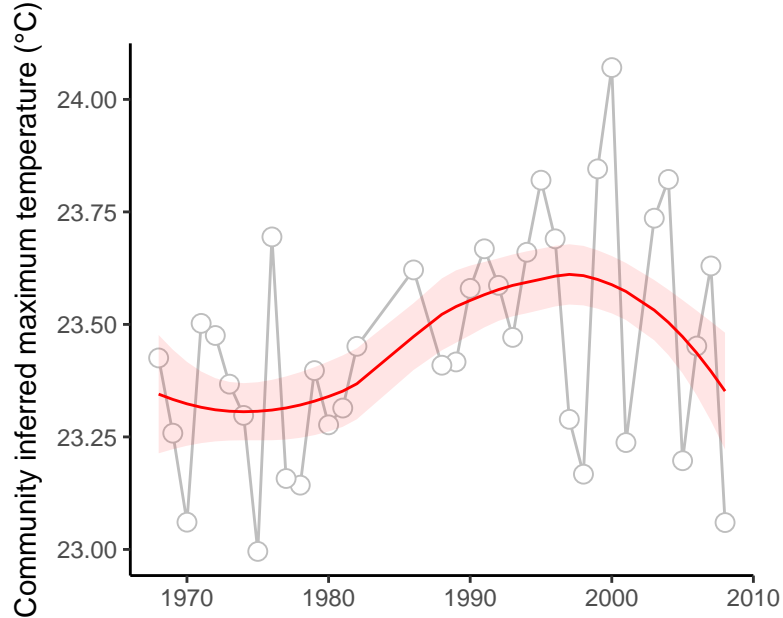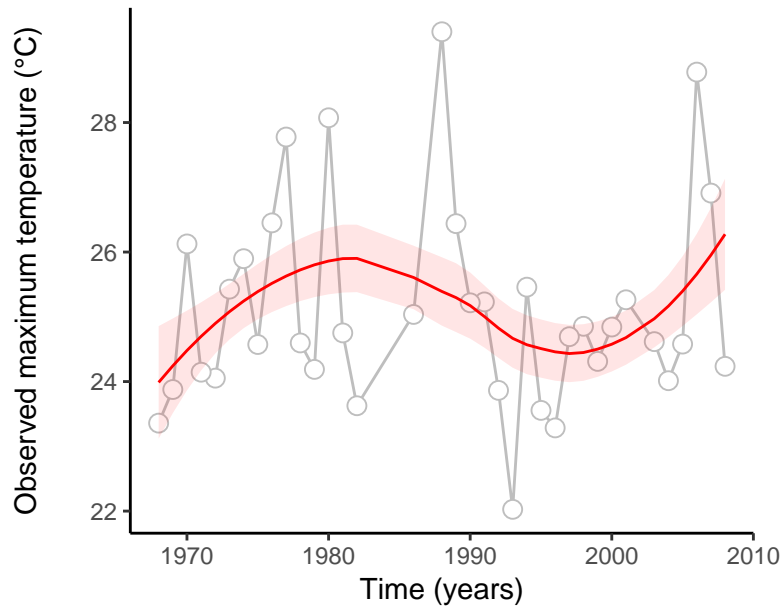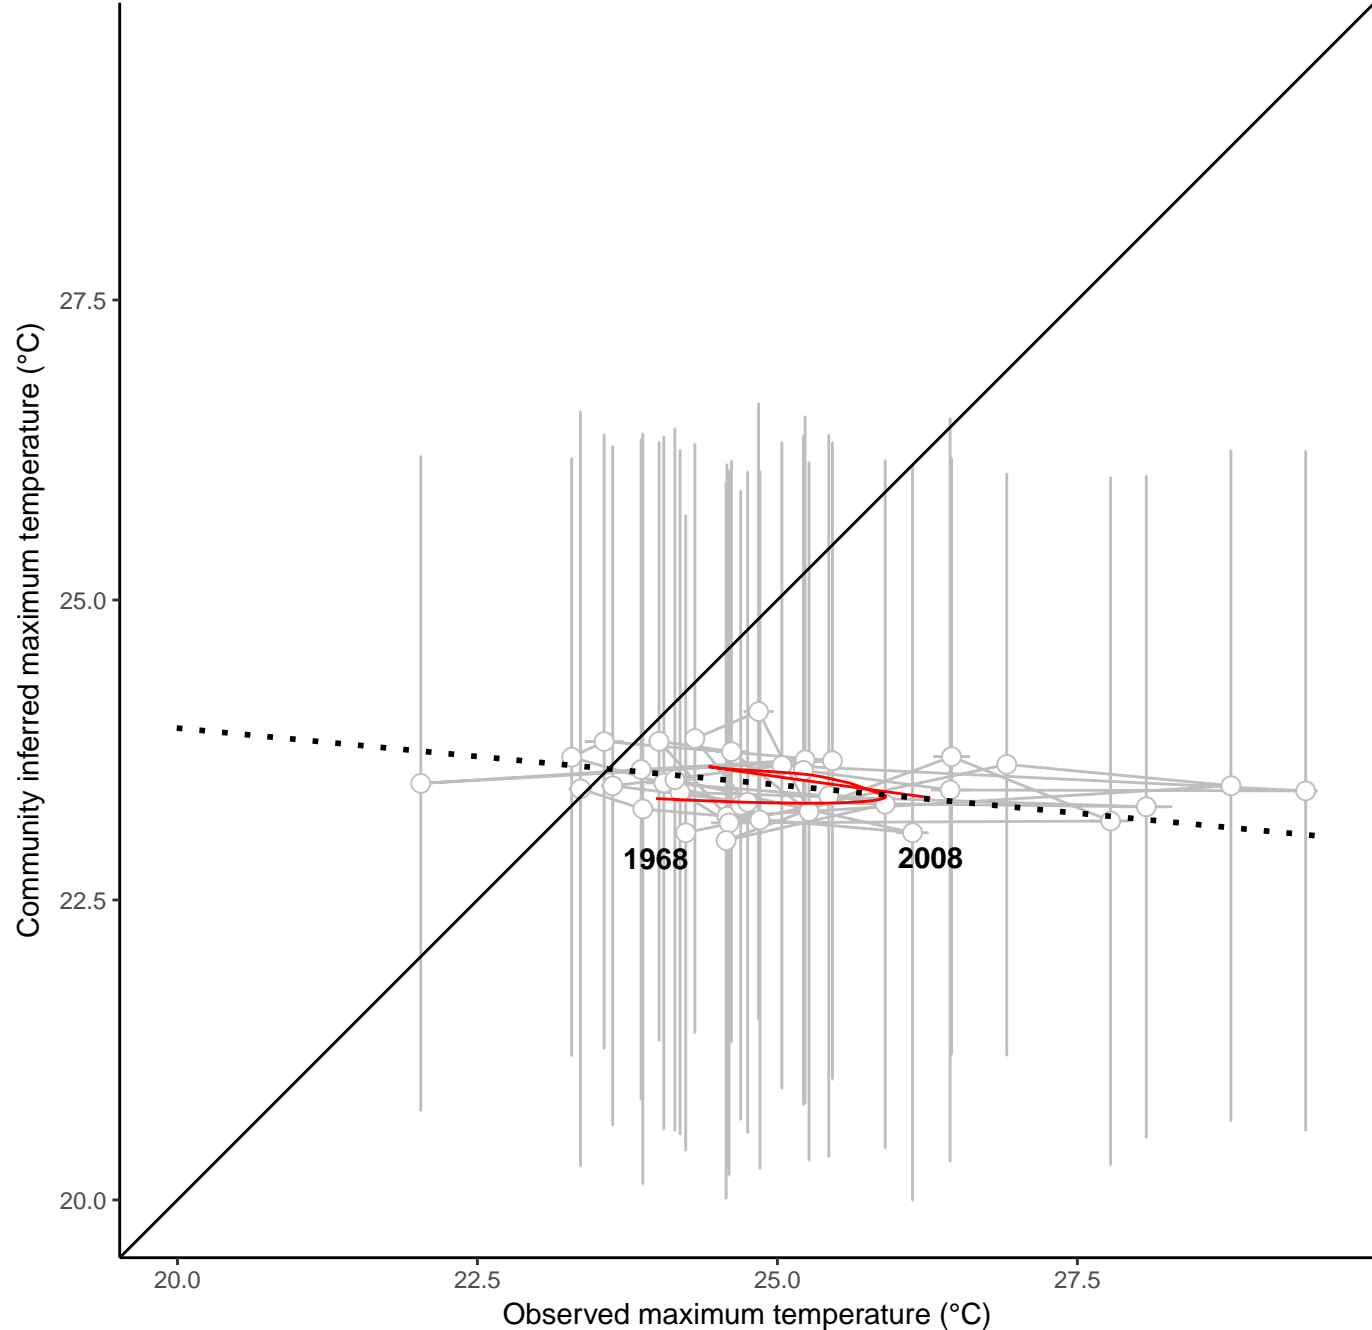

site : 840\_67\_10

absolute deviation = 6.39 | deviation change = -1.36 | maximum state number = 1

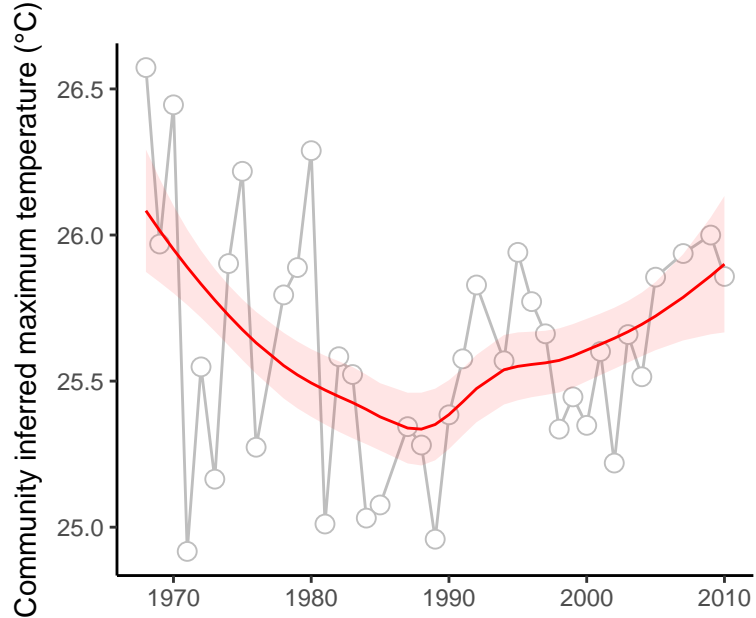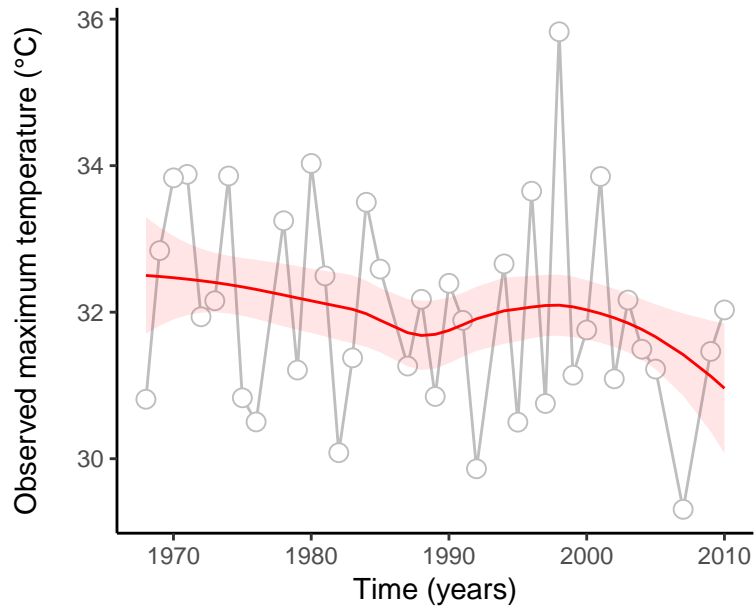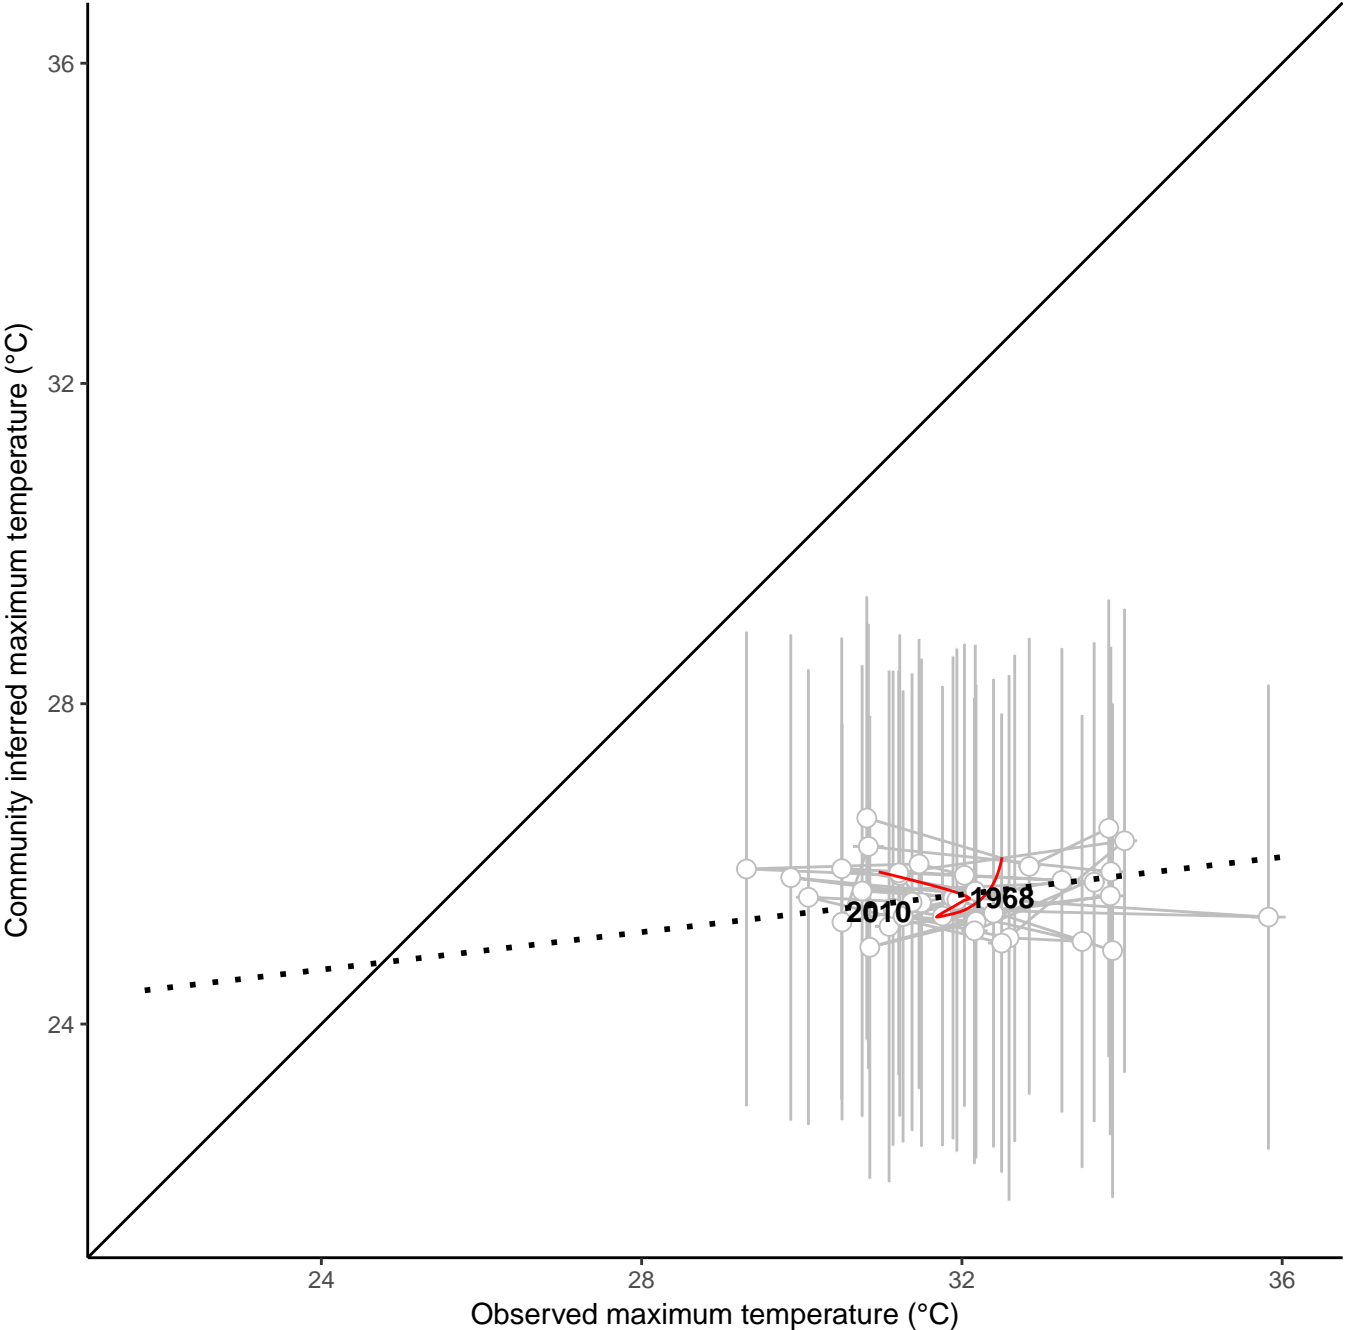

site : 840\_81\_33

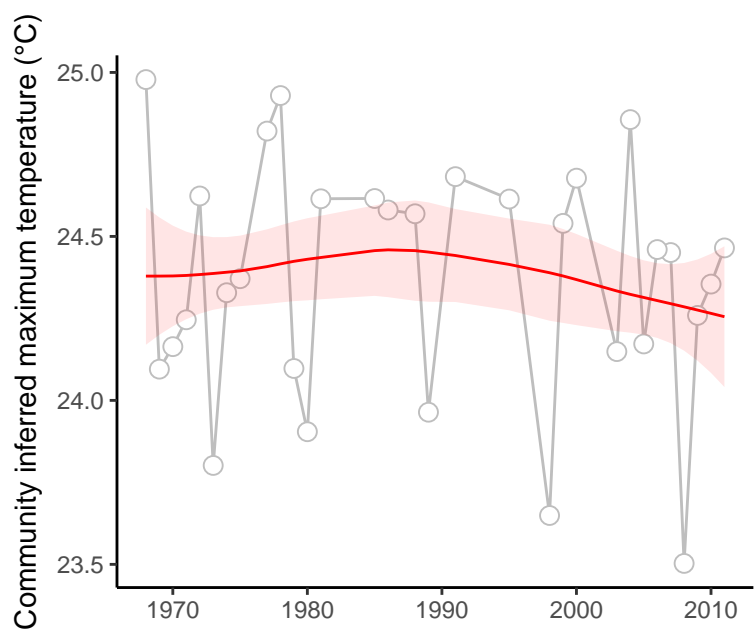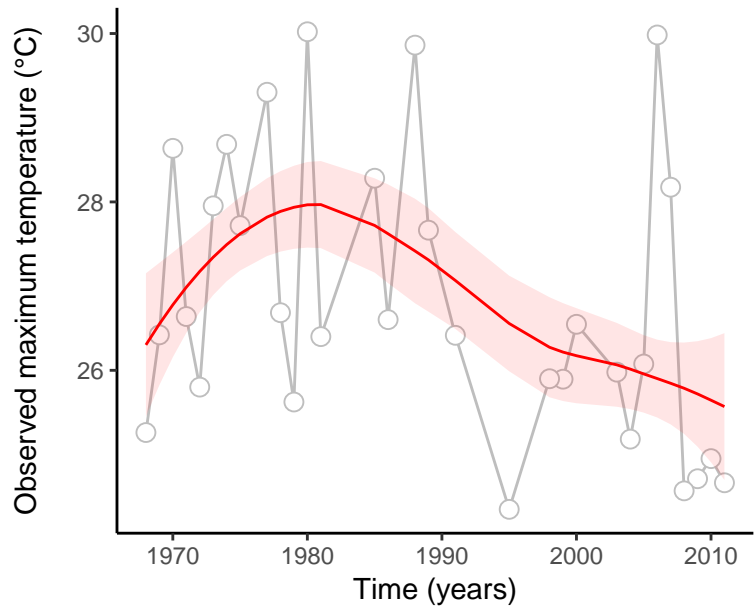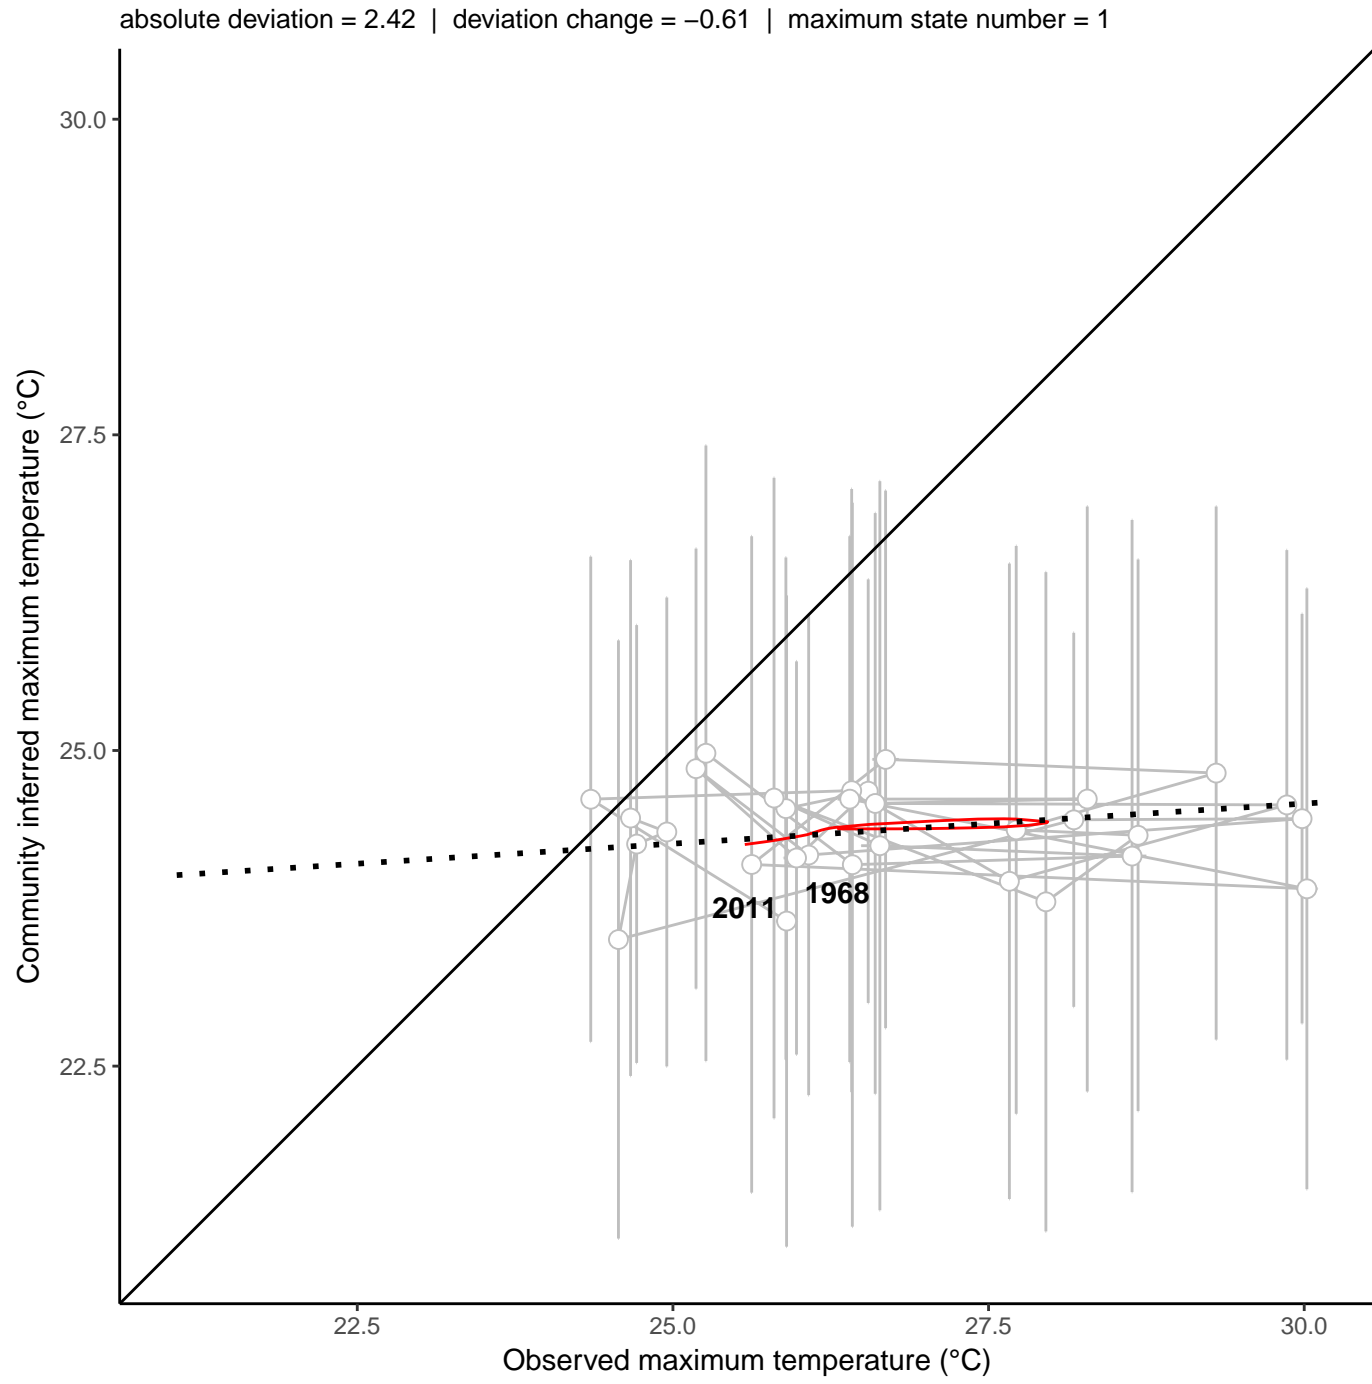



site : 840\_81\_35

absolute deviation = 2.06 | deviation change = -1.29 | maximum state number = 1

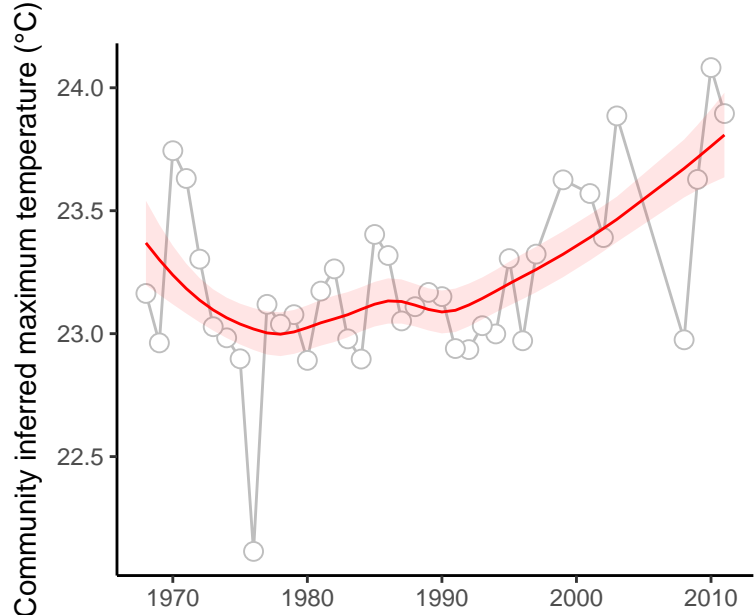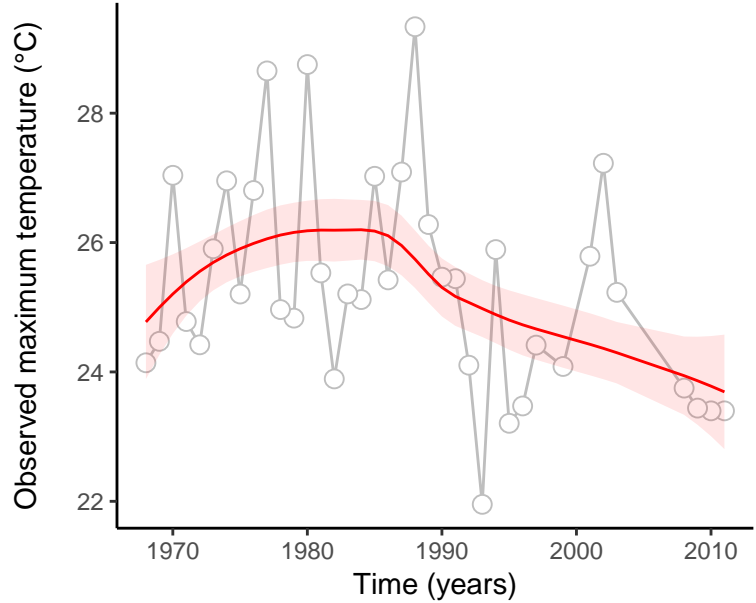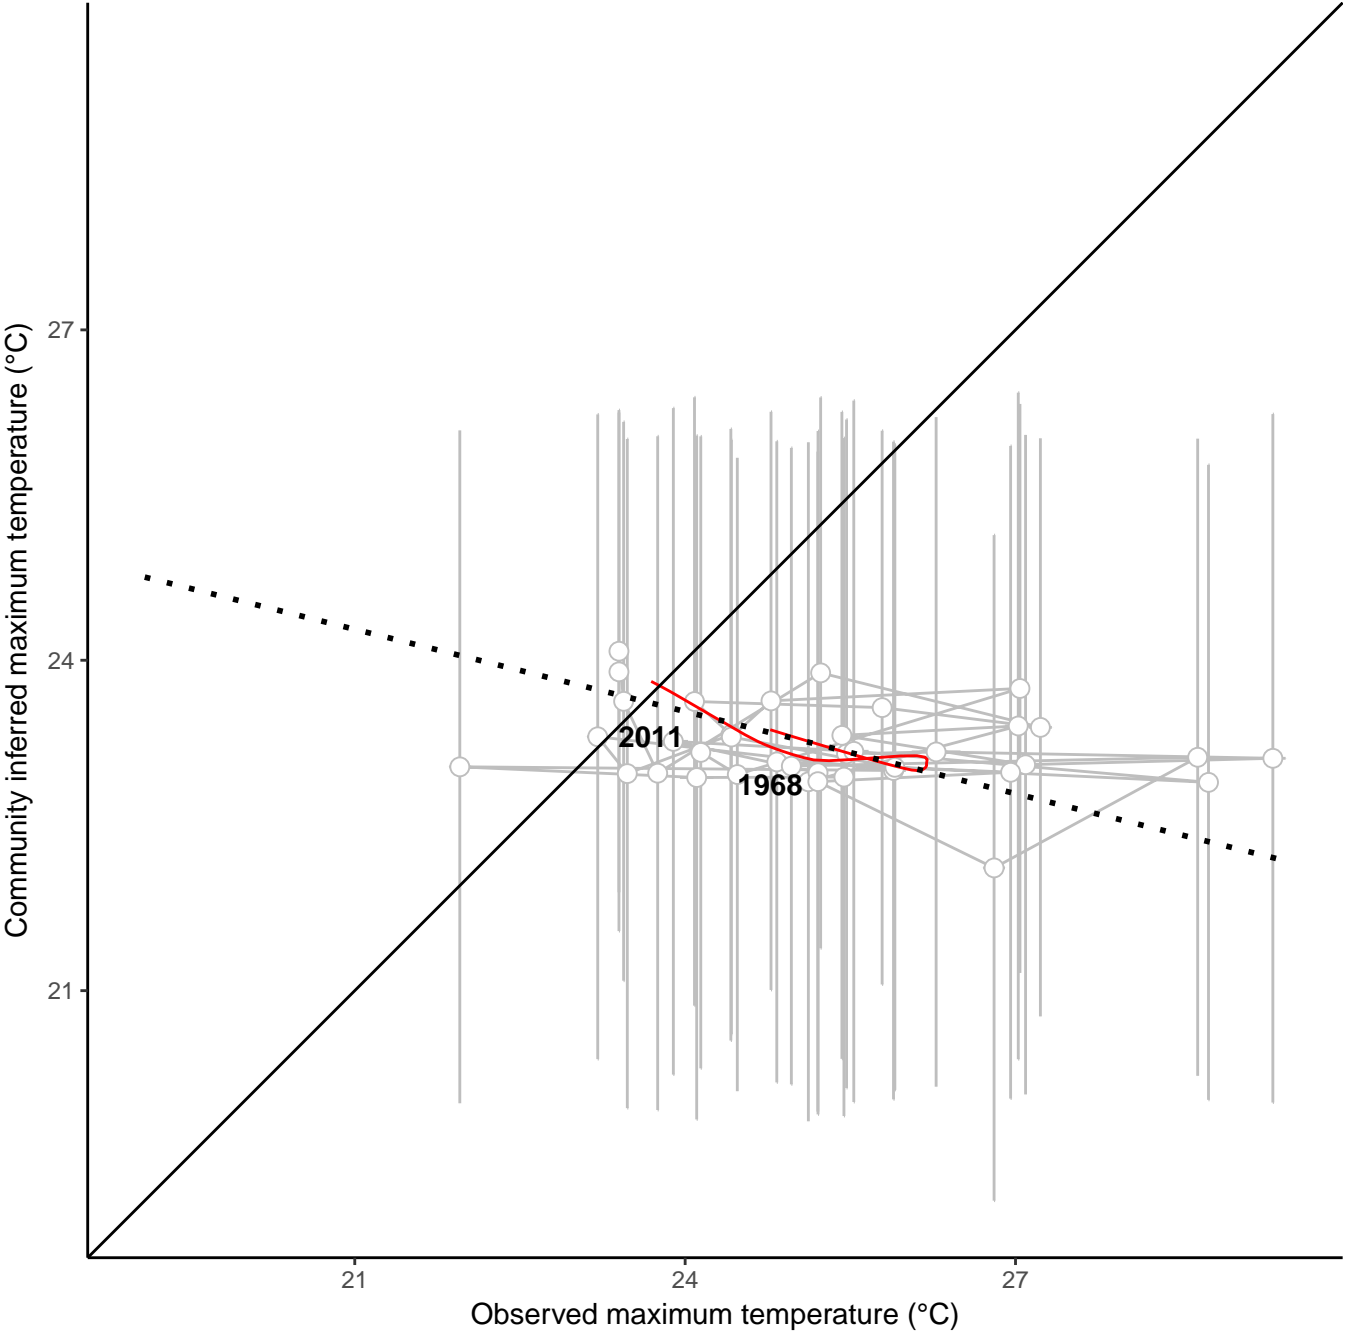

site : 840\_83\_11

absolute deviation = 4.6 | deviation change = 1.34 | maximum state number = 2

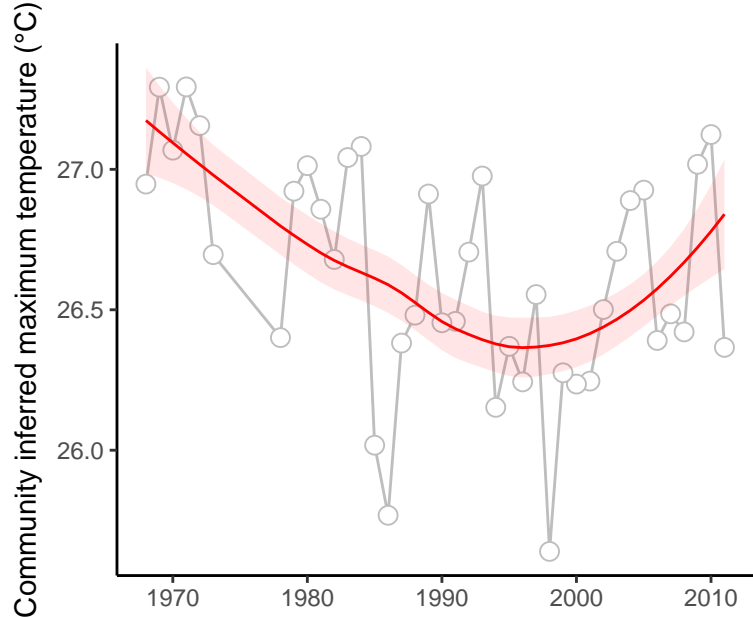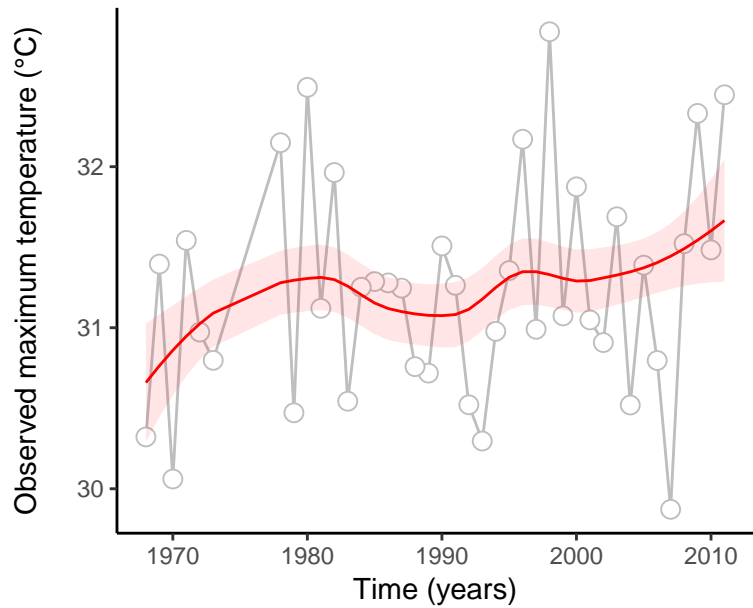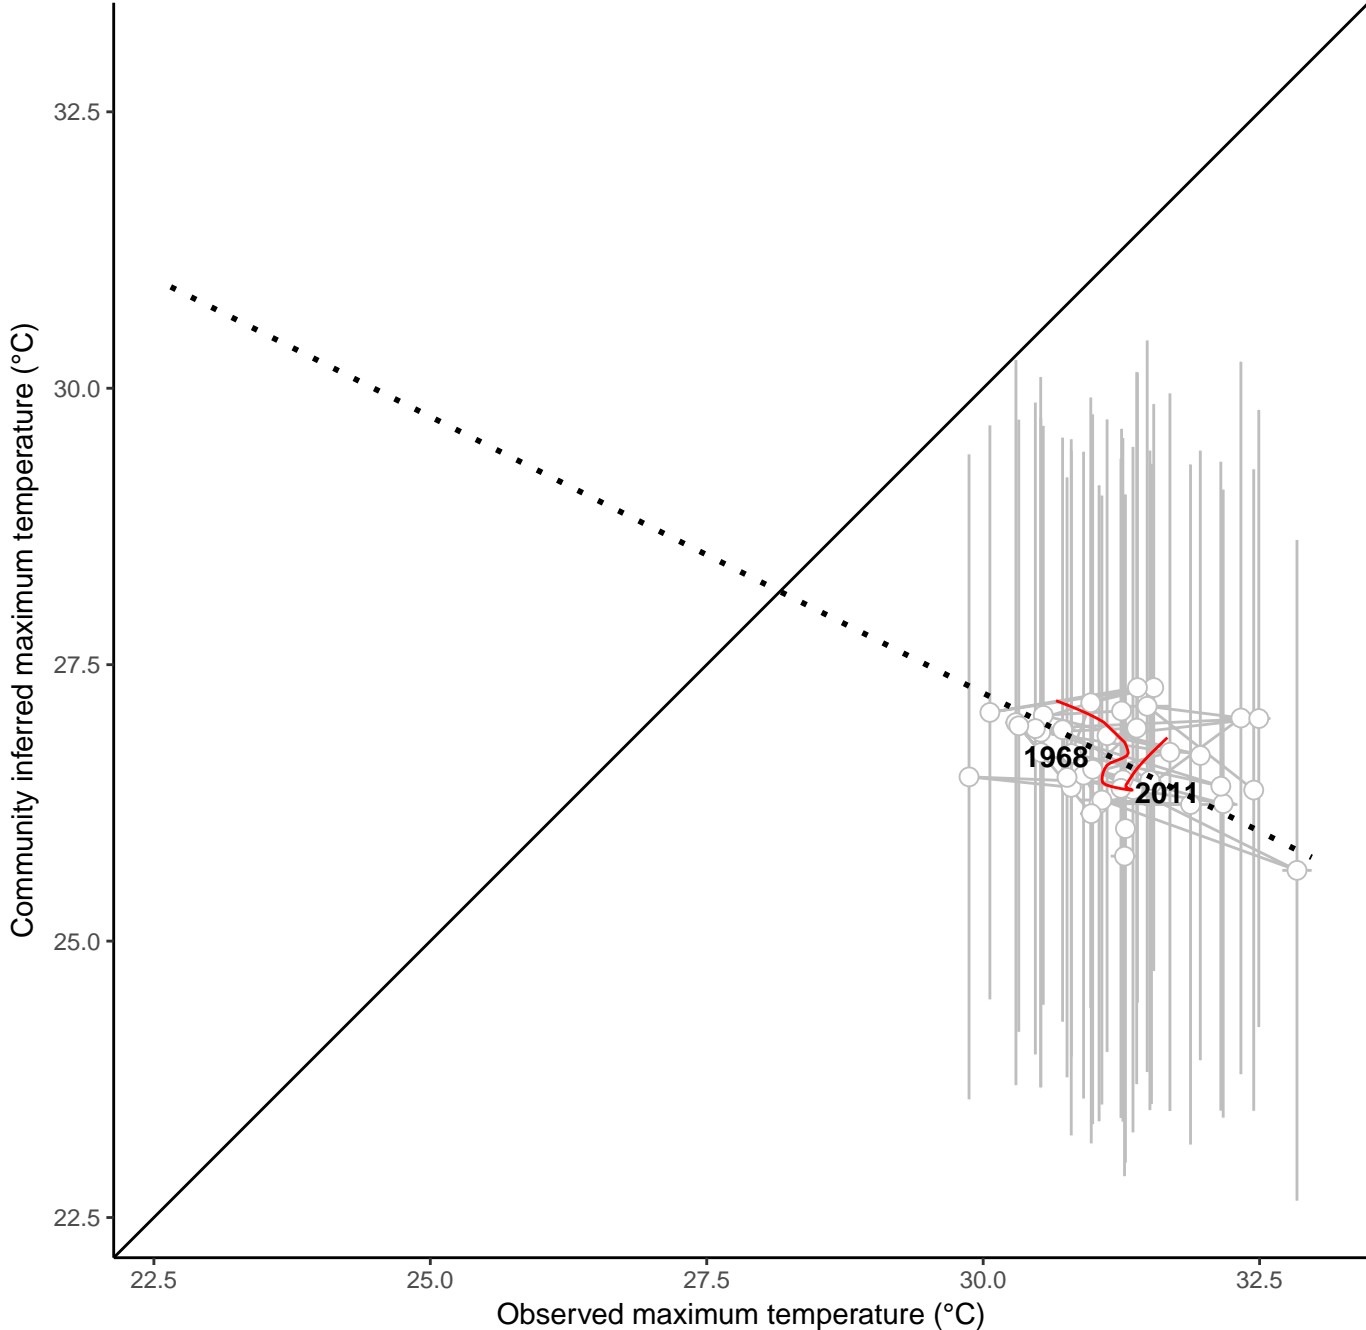

site : 840\_83\_49

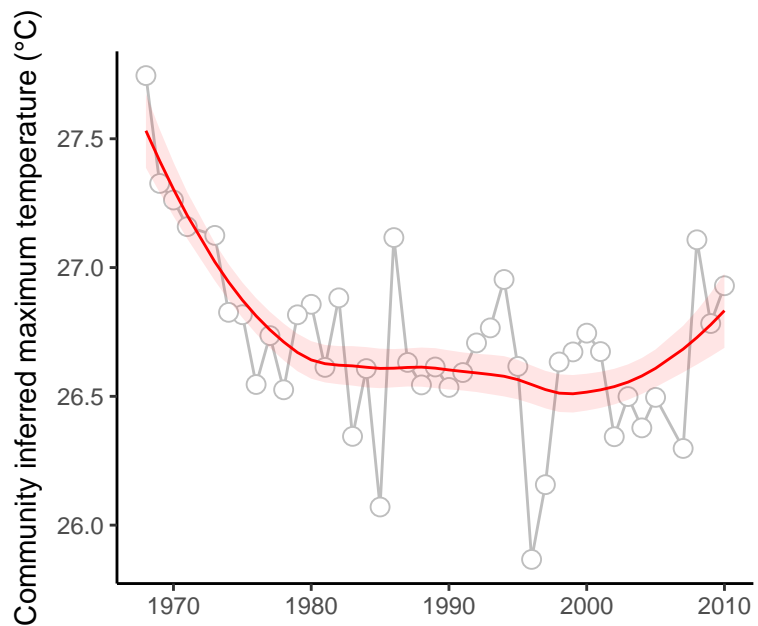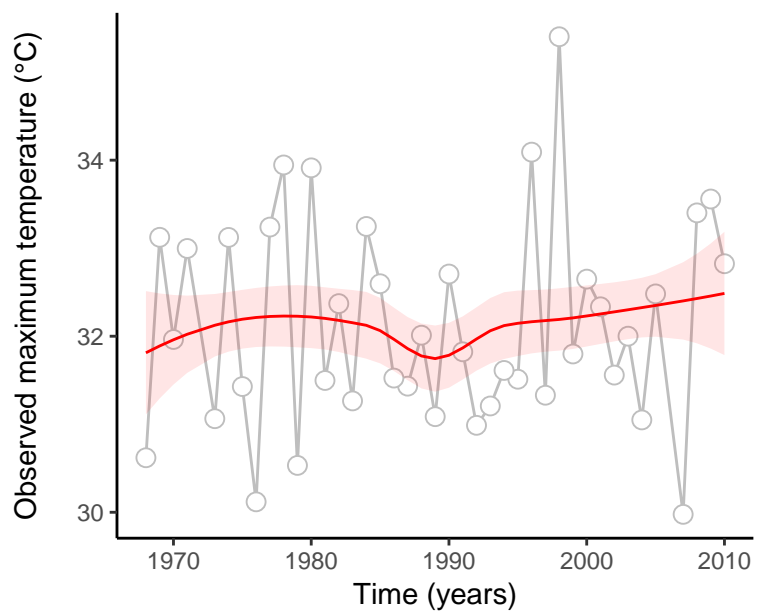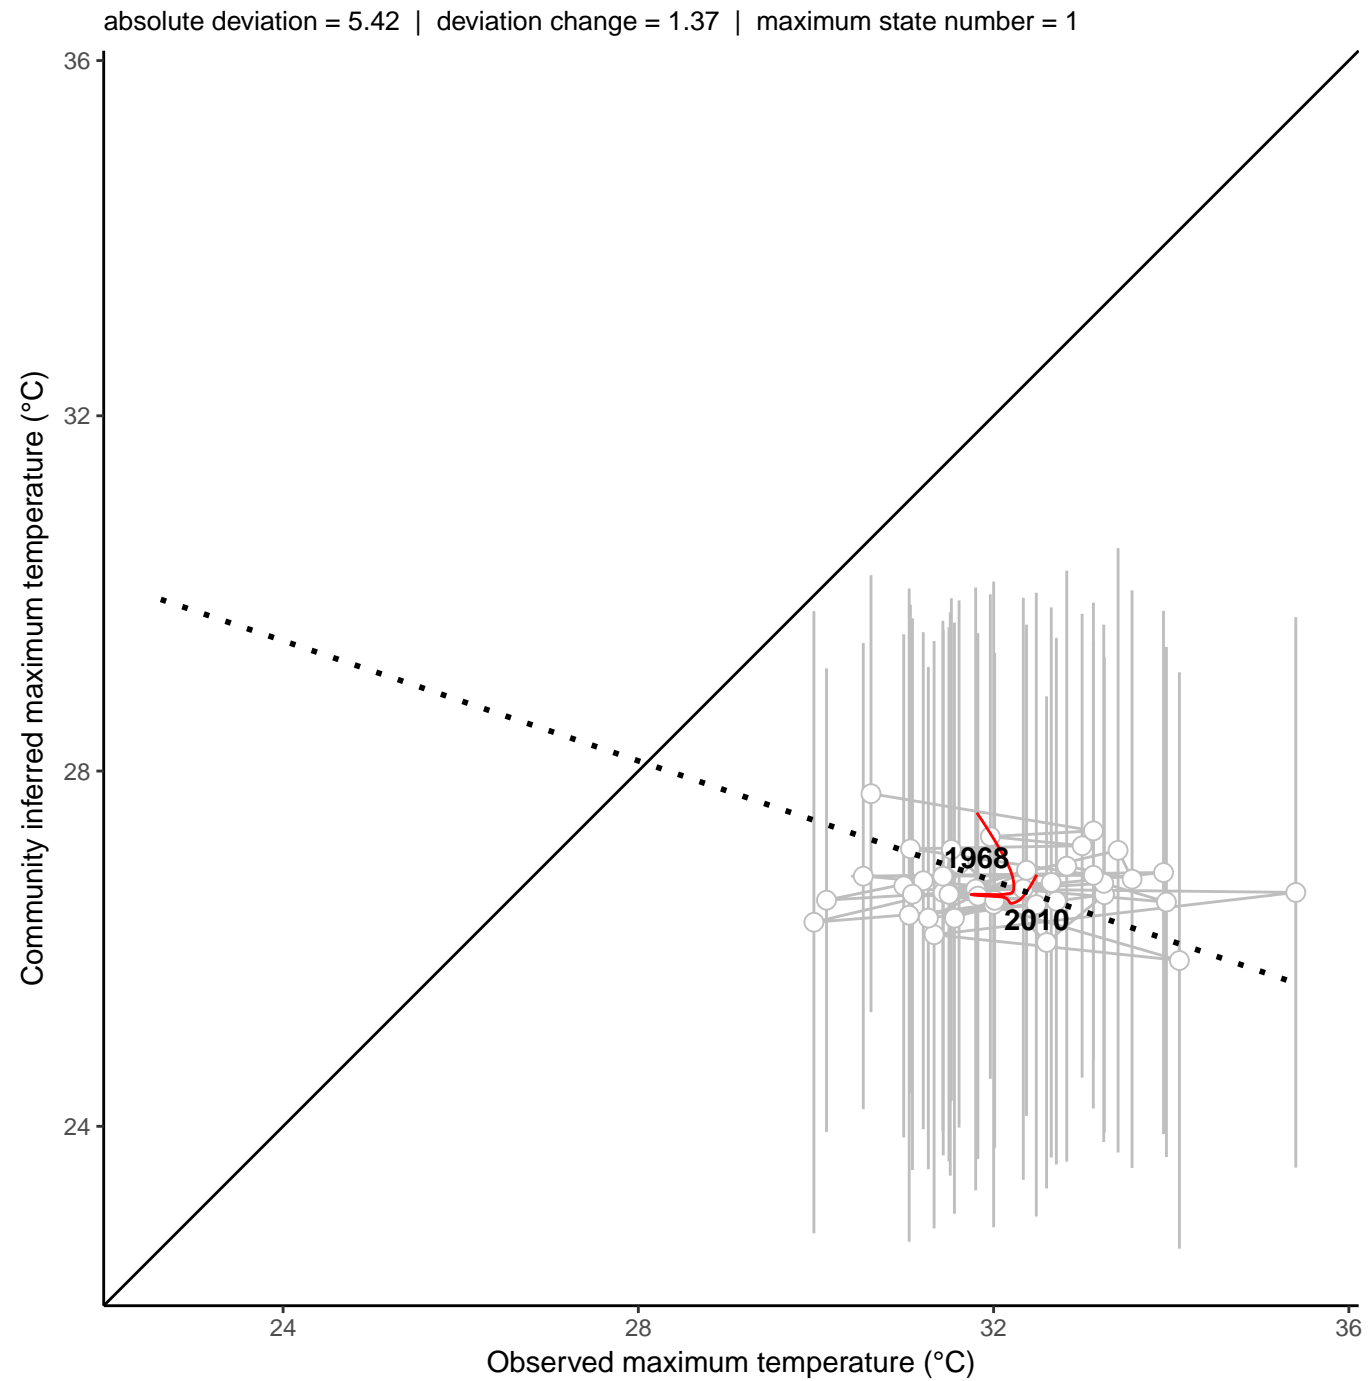

site : 840\_89\_22

absolute deviation = 4.31 | deviation change = -2.7 | maximum state number = 1

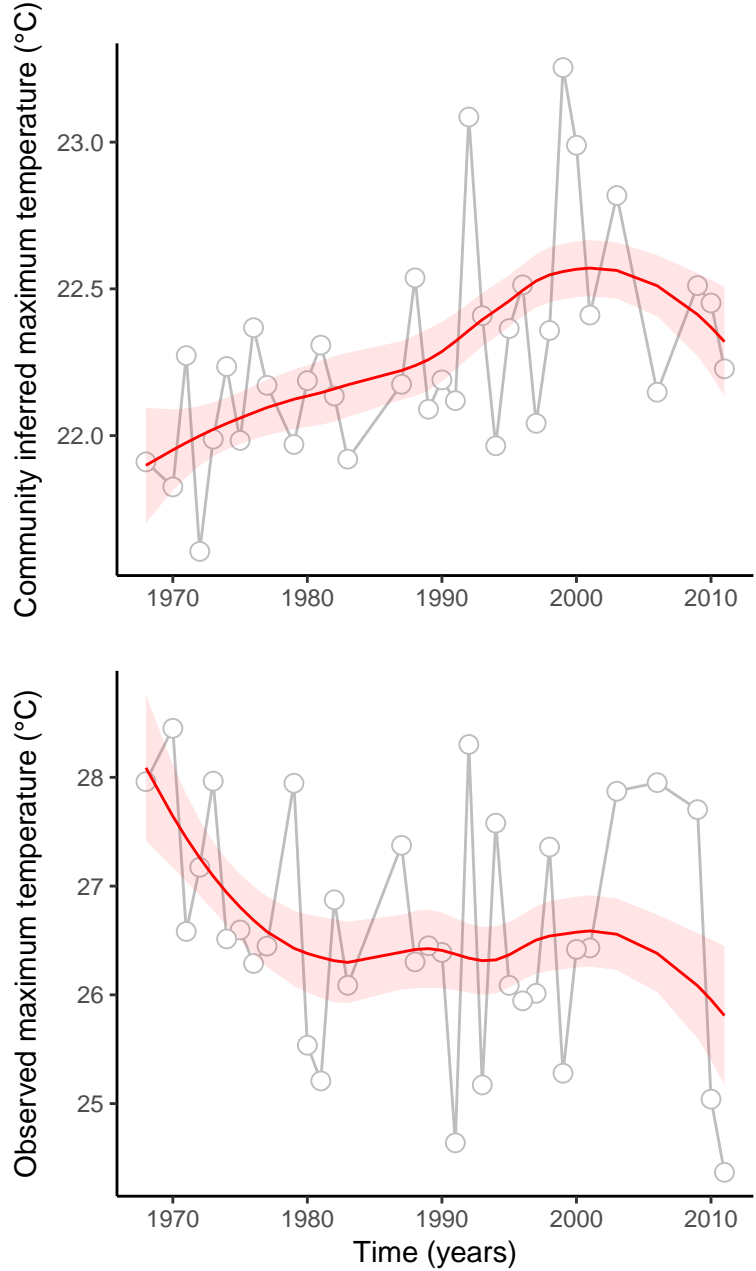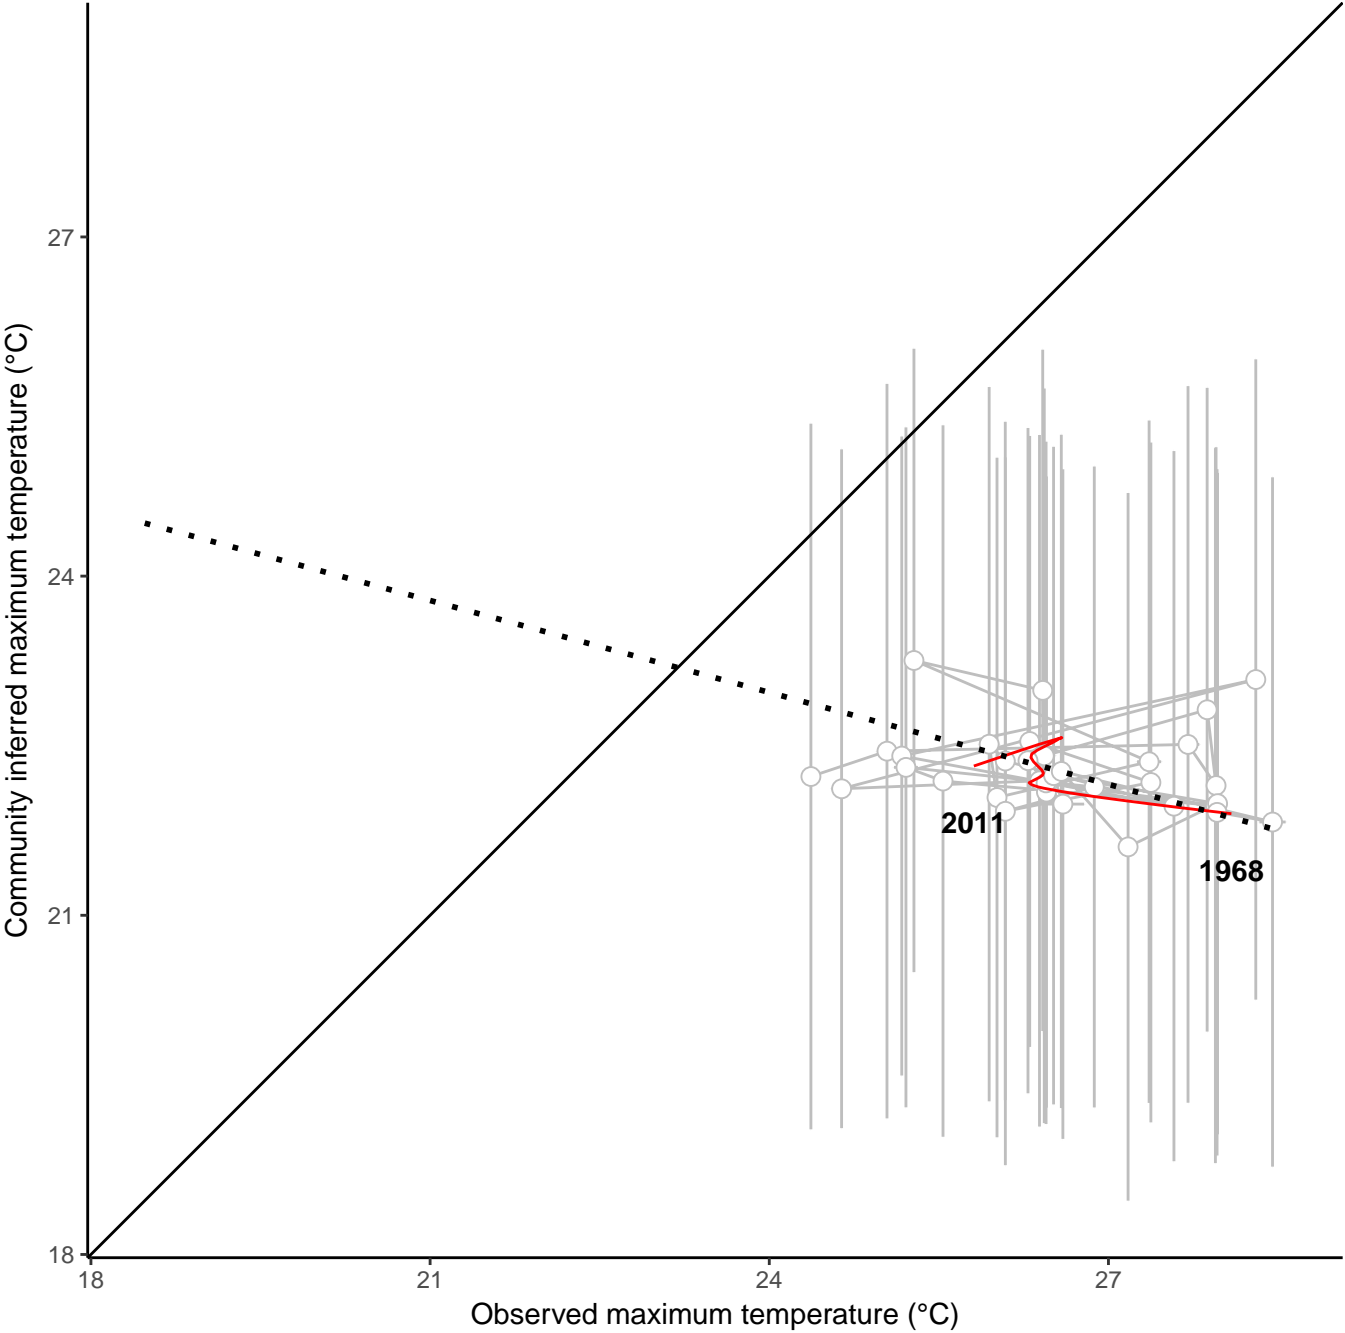

site : 840\_25\_15

absolute deviation = 4.43 | deviation change = 0.08 | maximum state number = 1

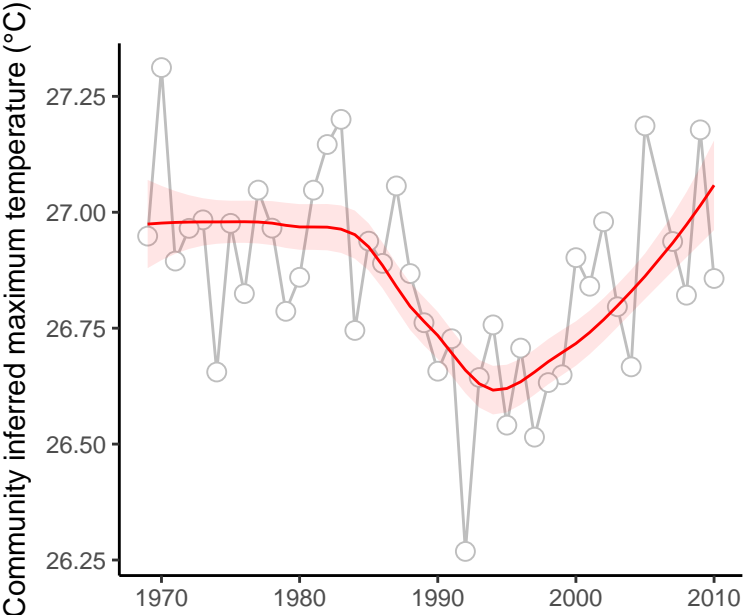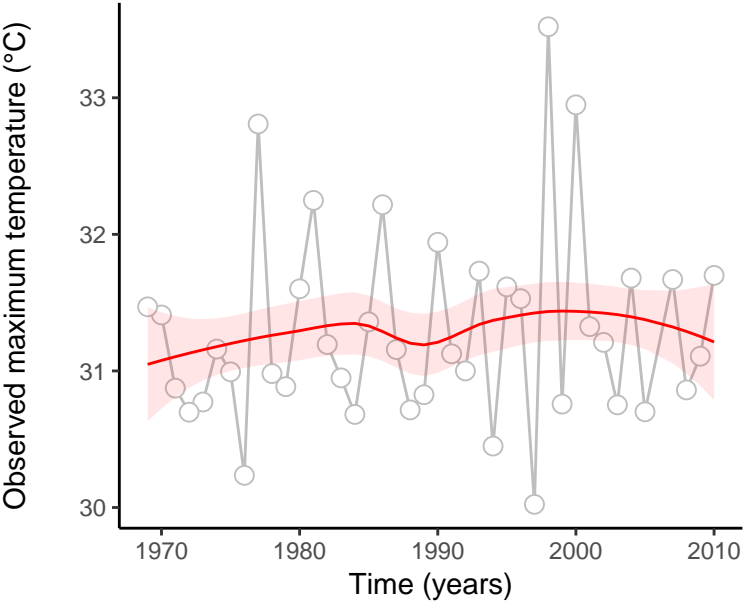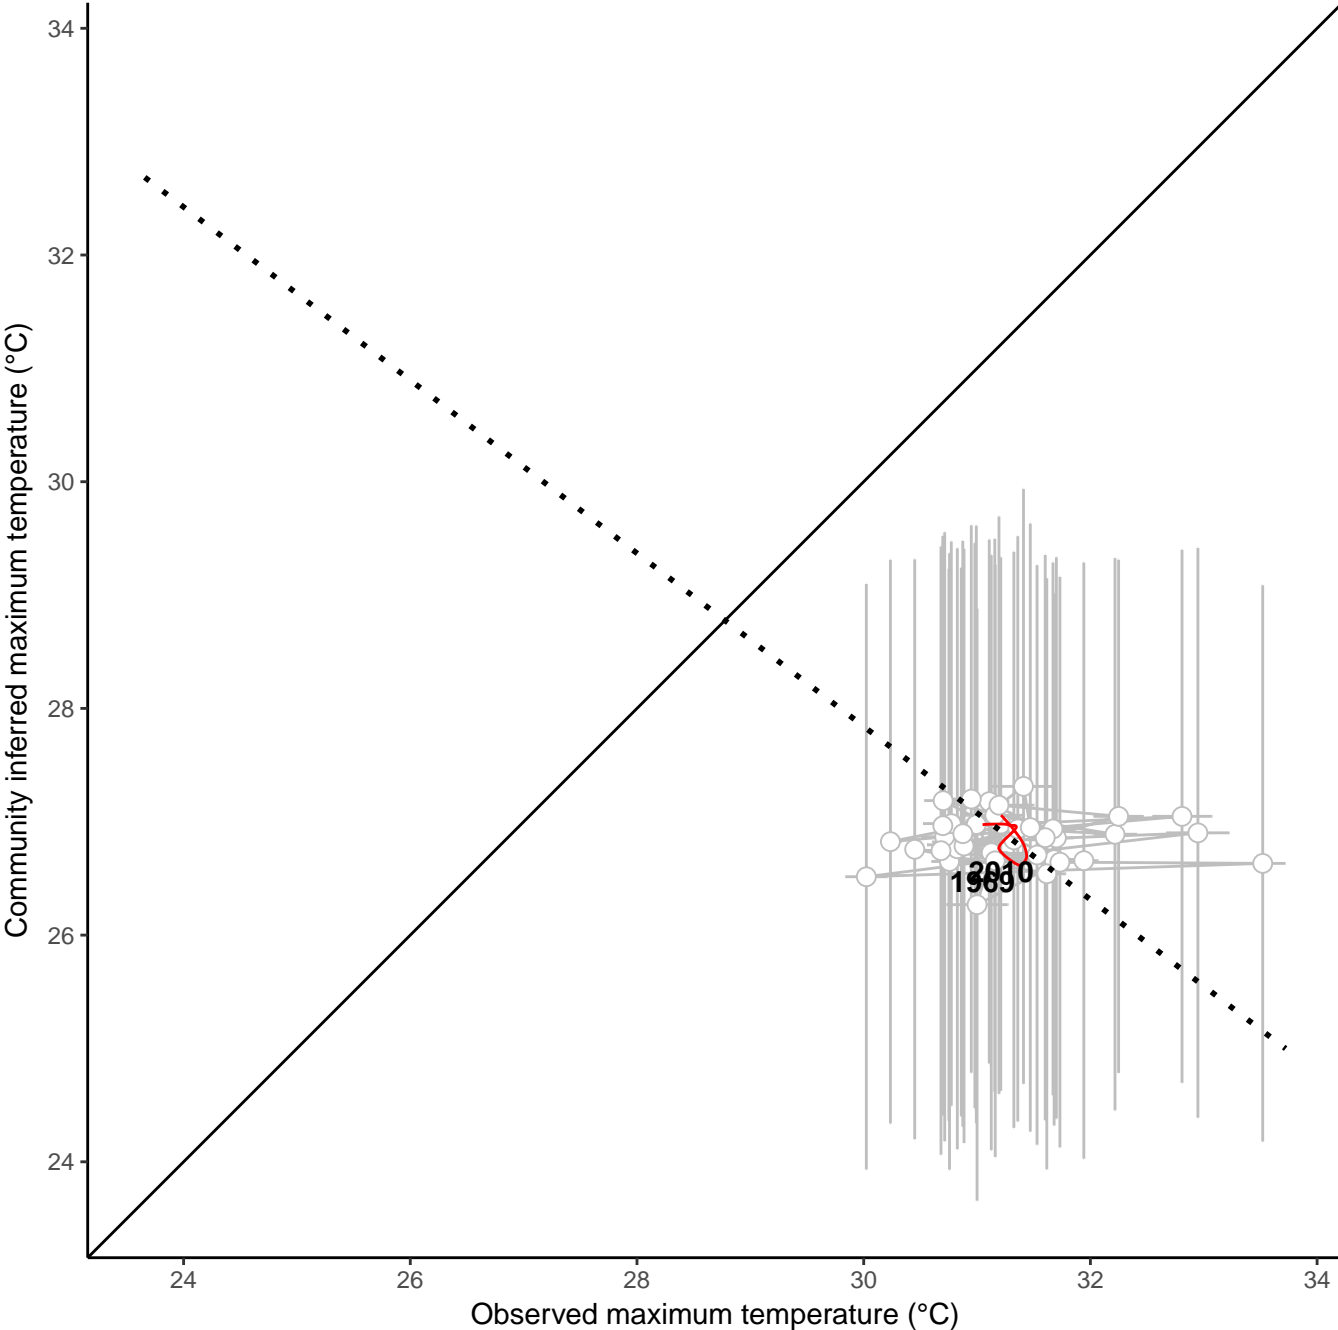

site : 840\_33\_21

absolute deviation = 2.25 | deviation change = -0.99 | maximum state number = 1

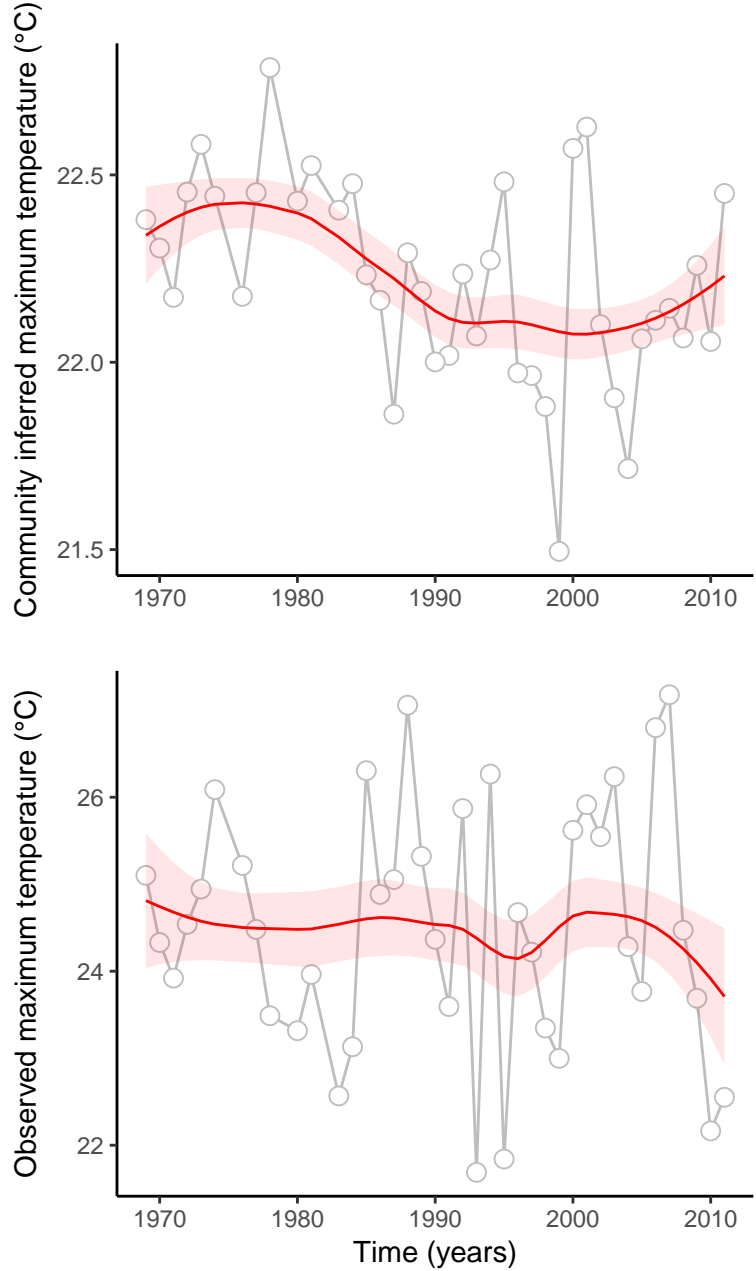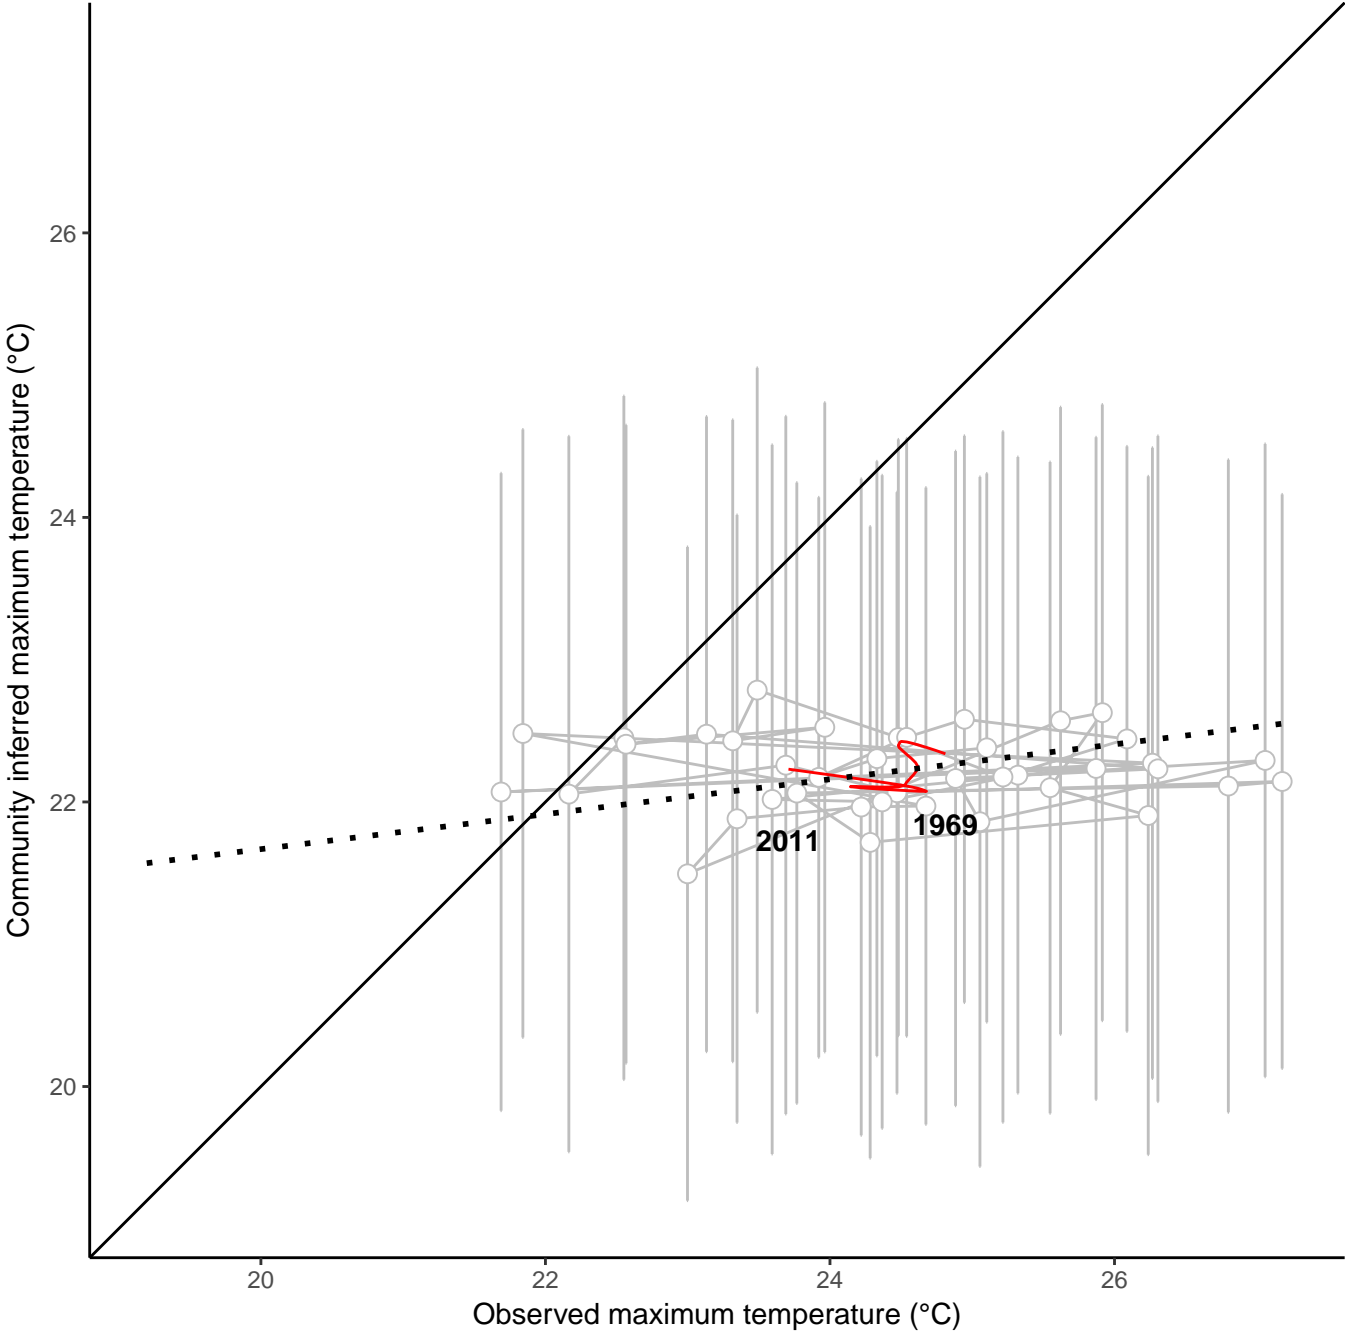

site : 840\_34\_15

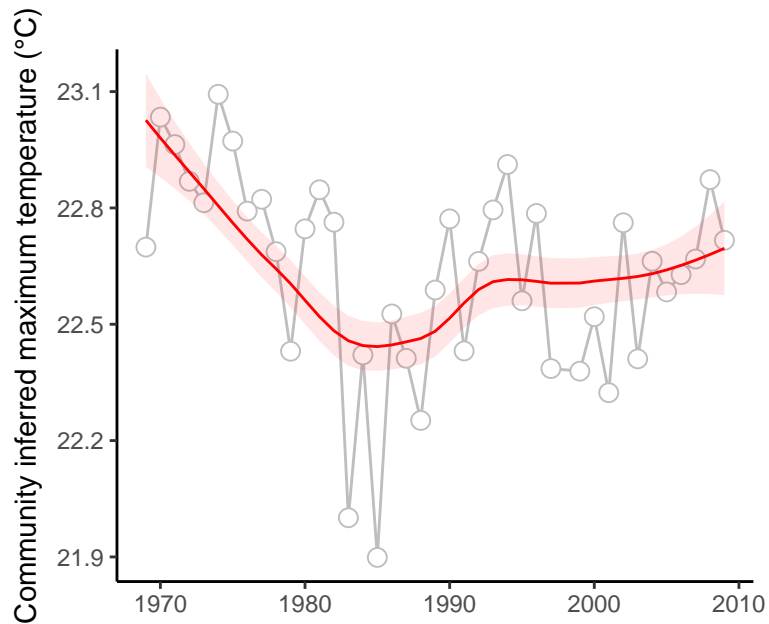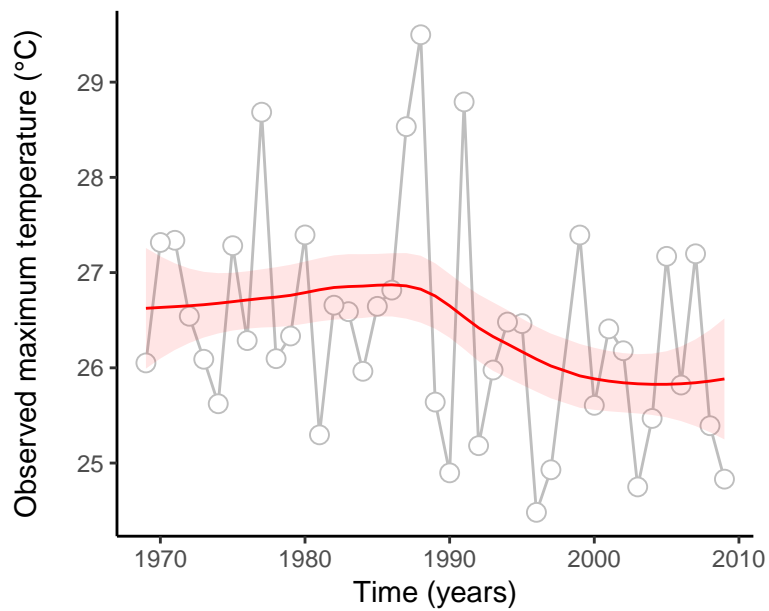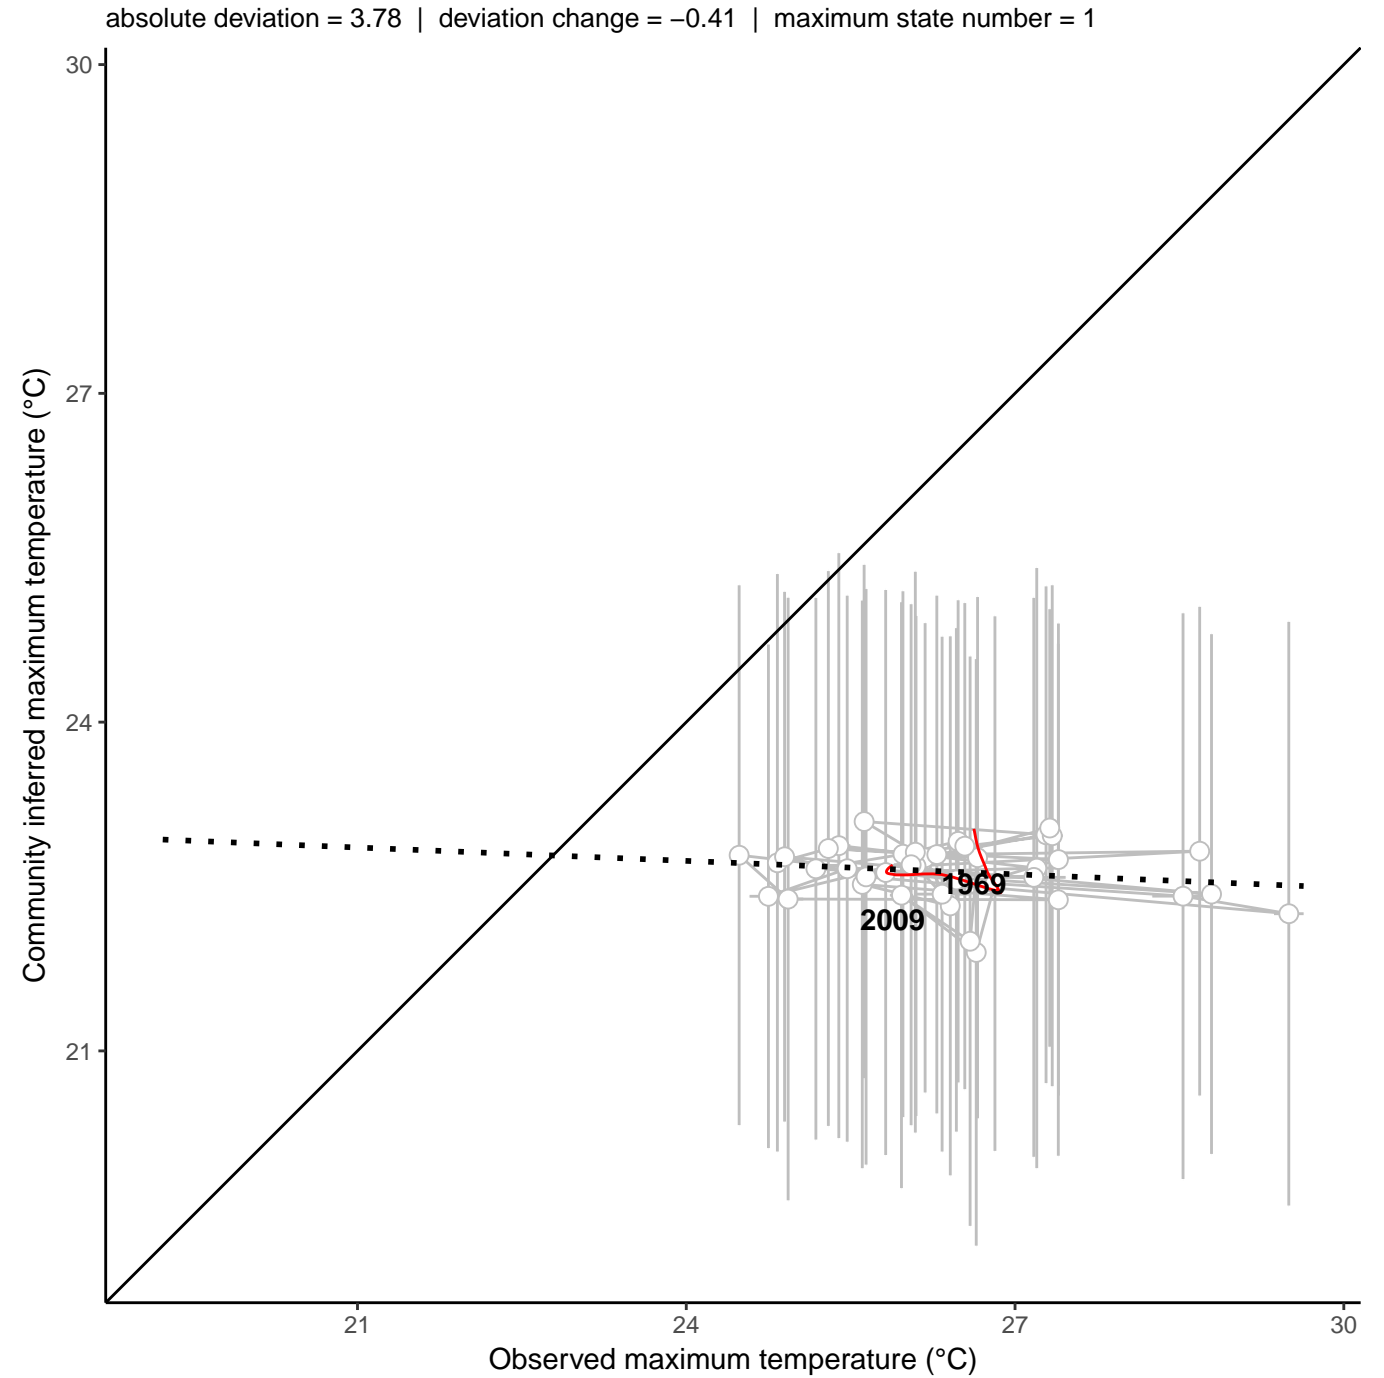

site : 840\_36\_33

absolute deviation = 2.44 | deviation change = 0.11 | maximum state number = 1

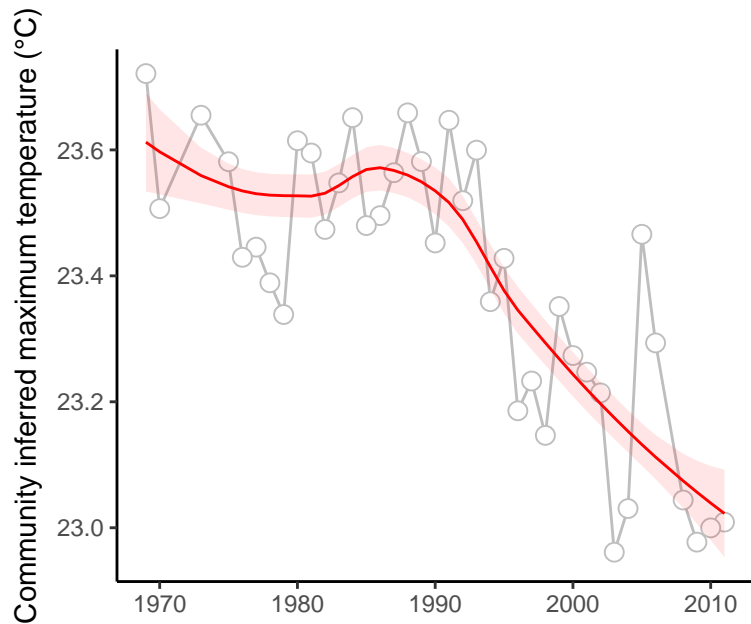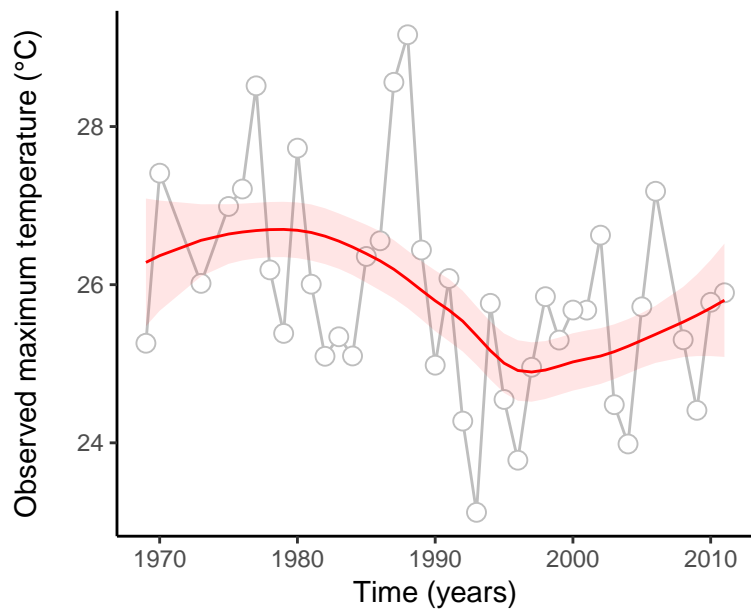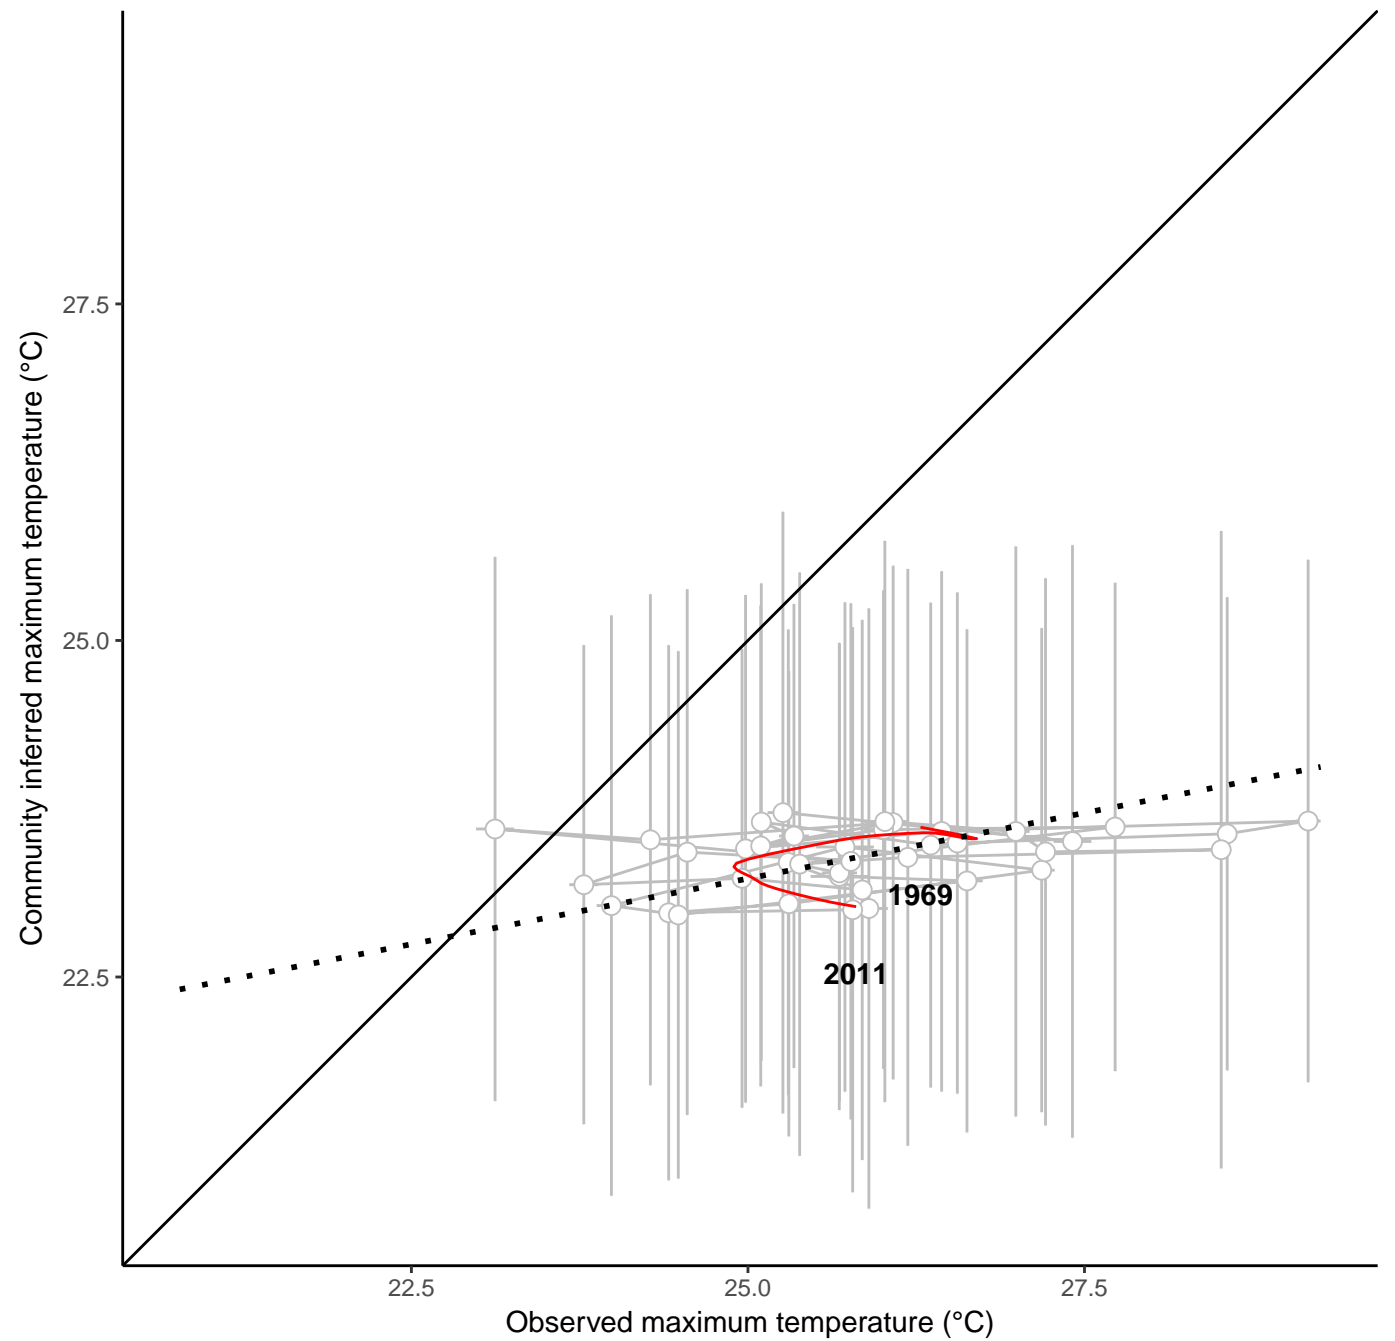



site : 840\_50\_42

absolute deviation = 0.47 | deviation change = -0.12 | maximum state number = 1

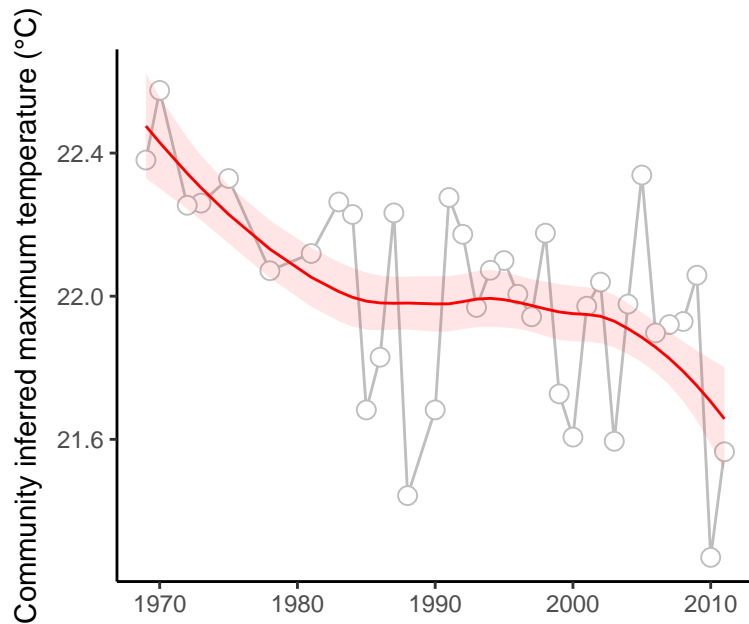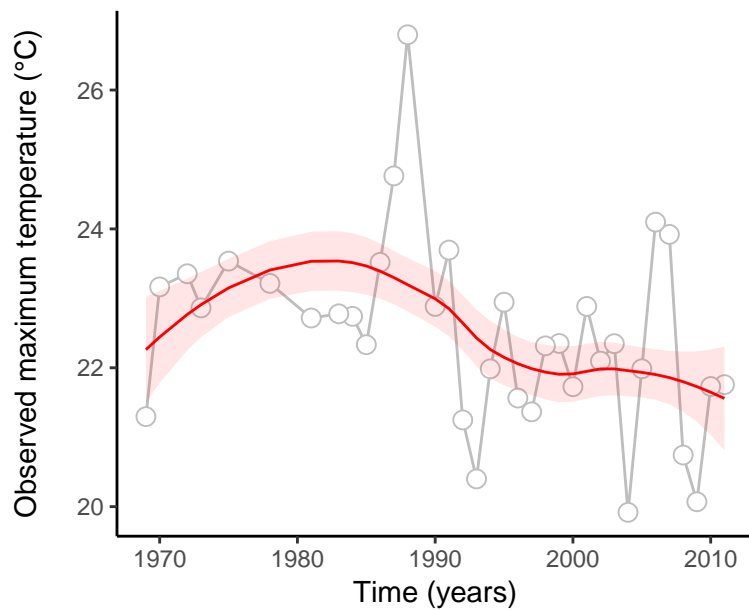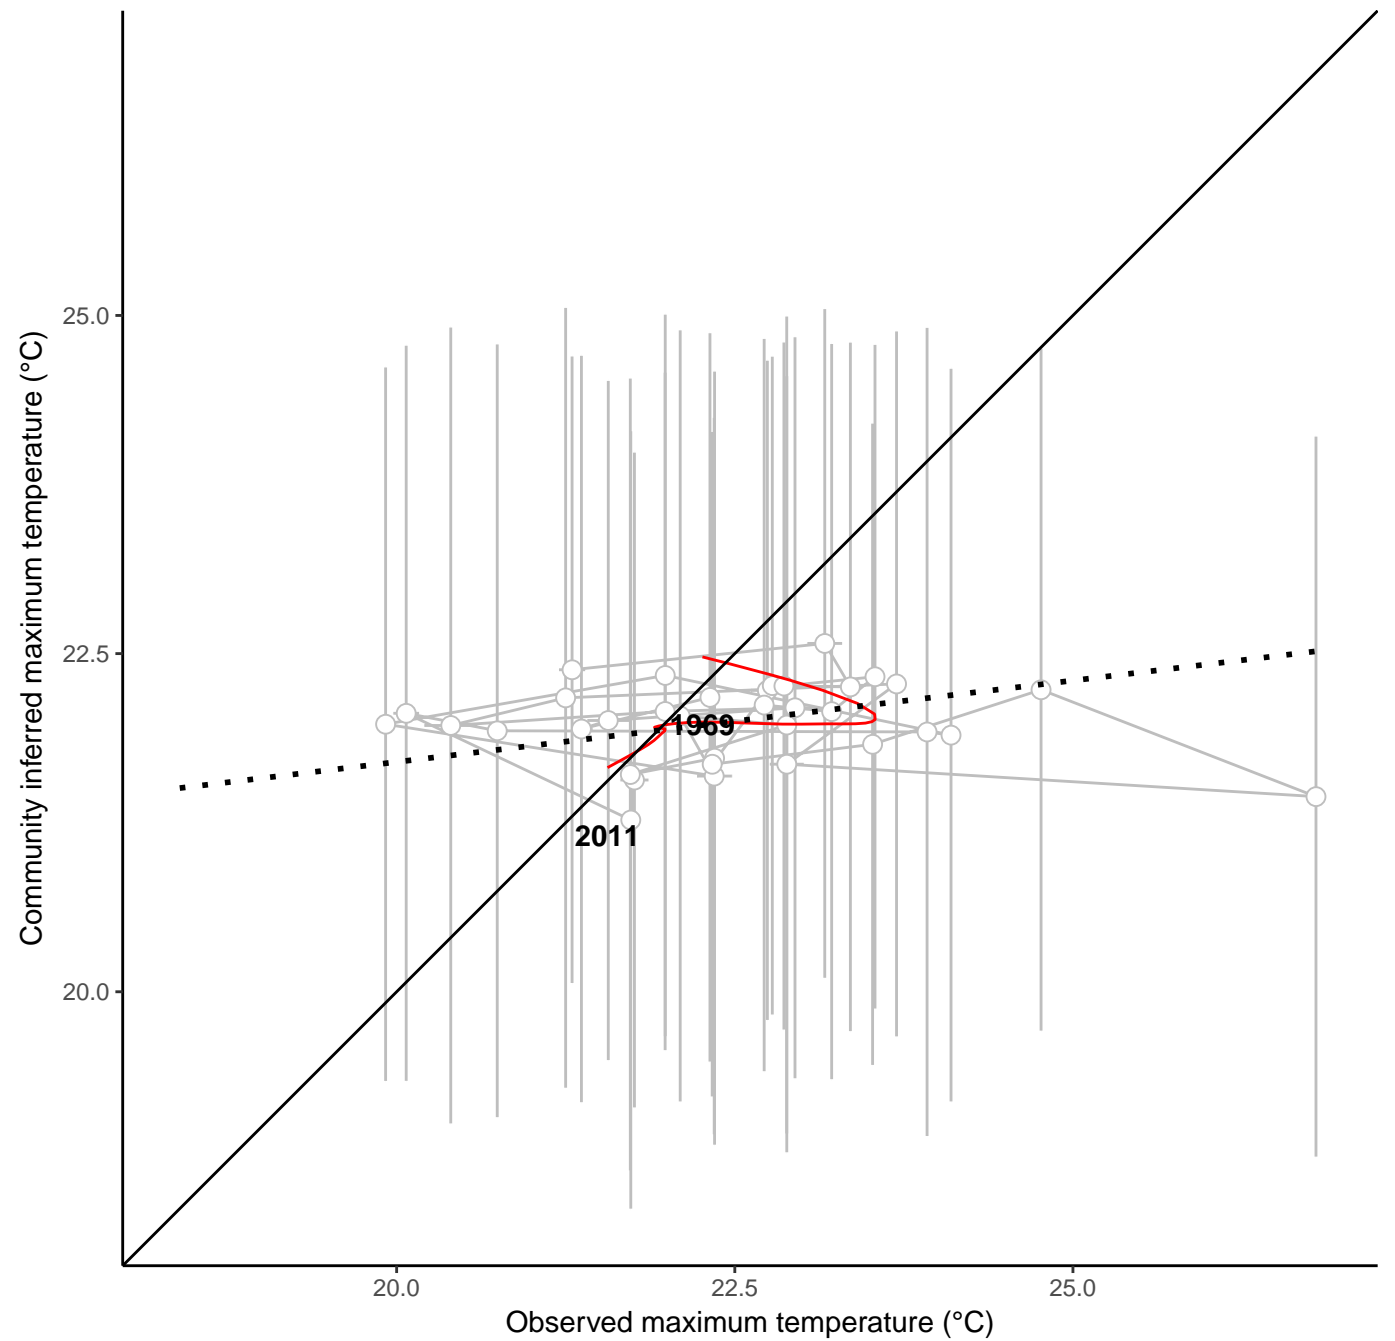

site : 840\_52\_29

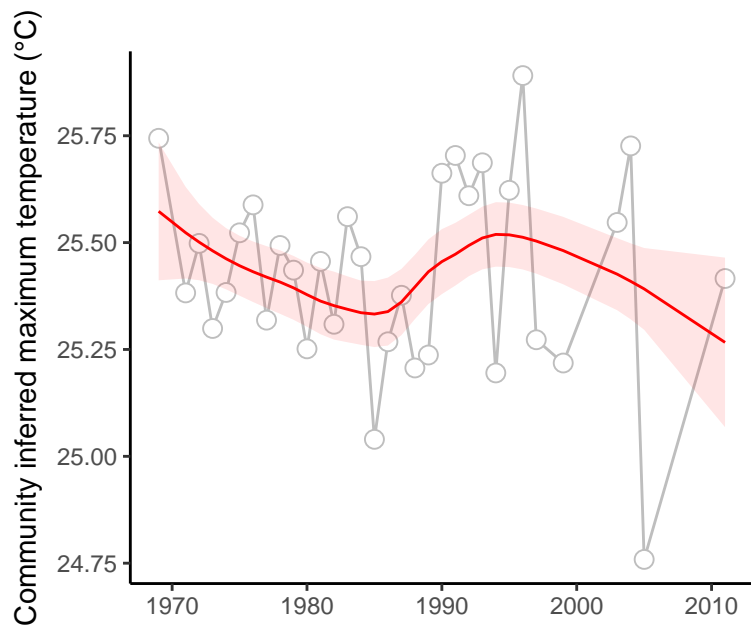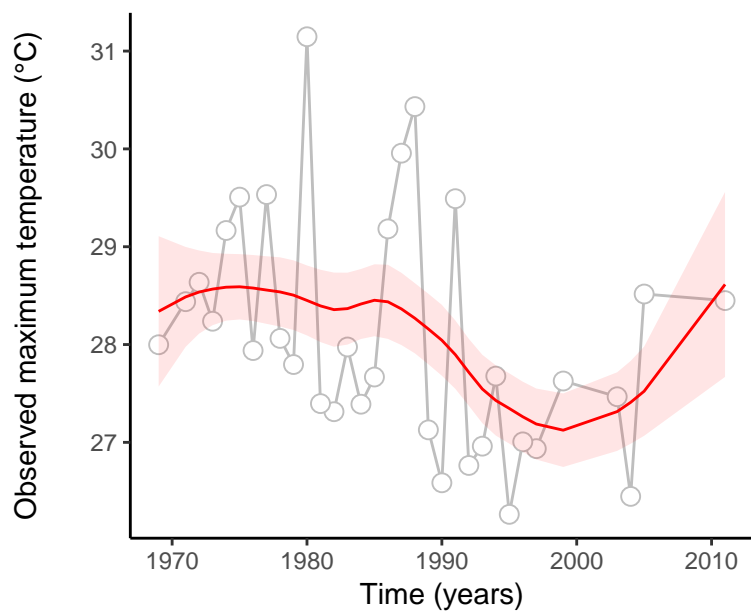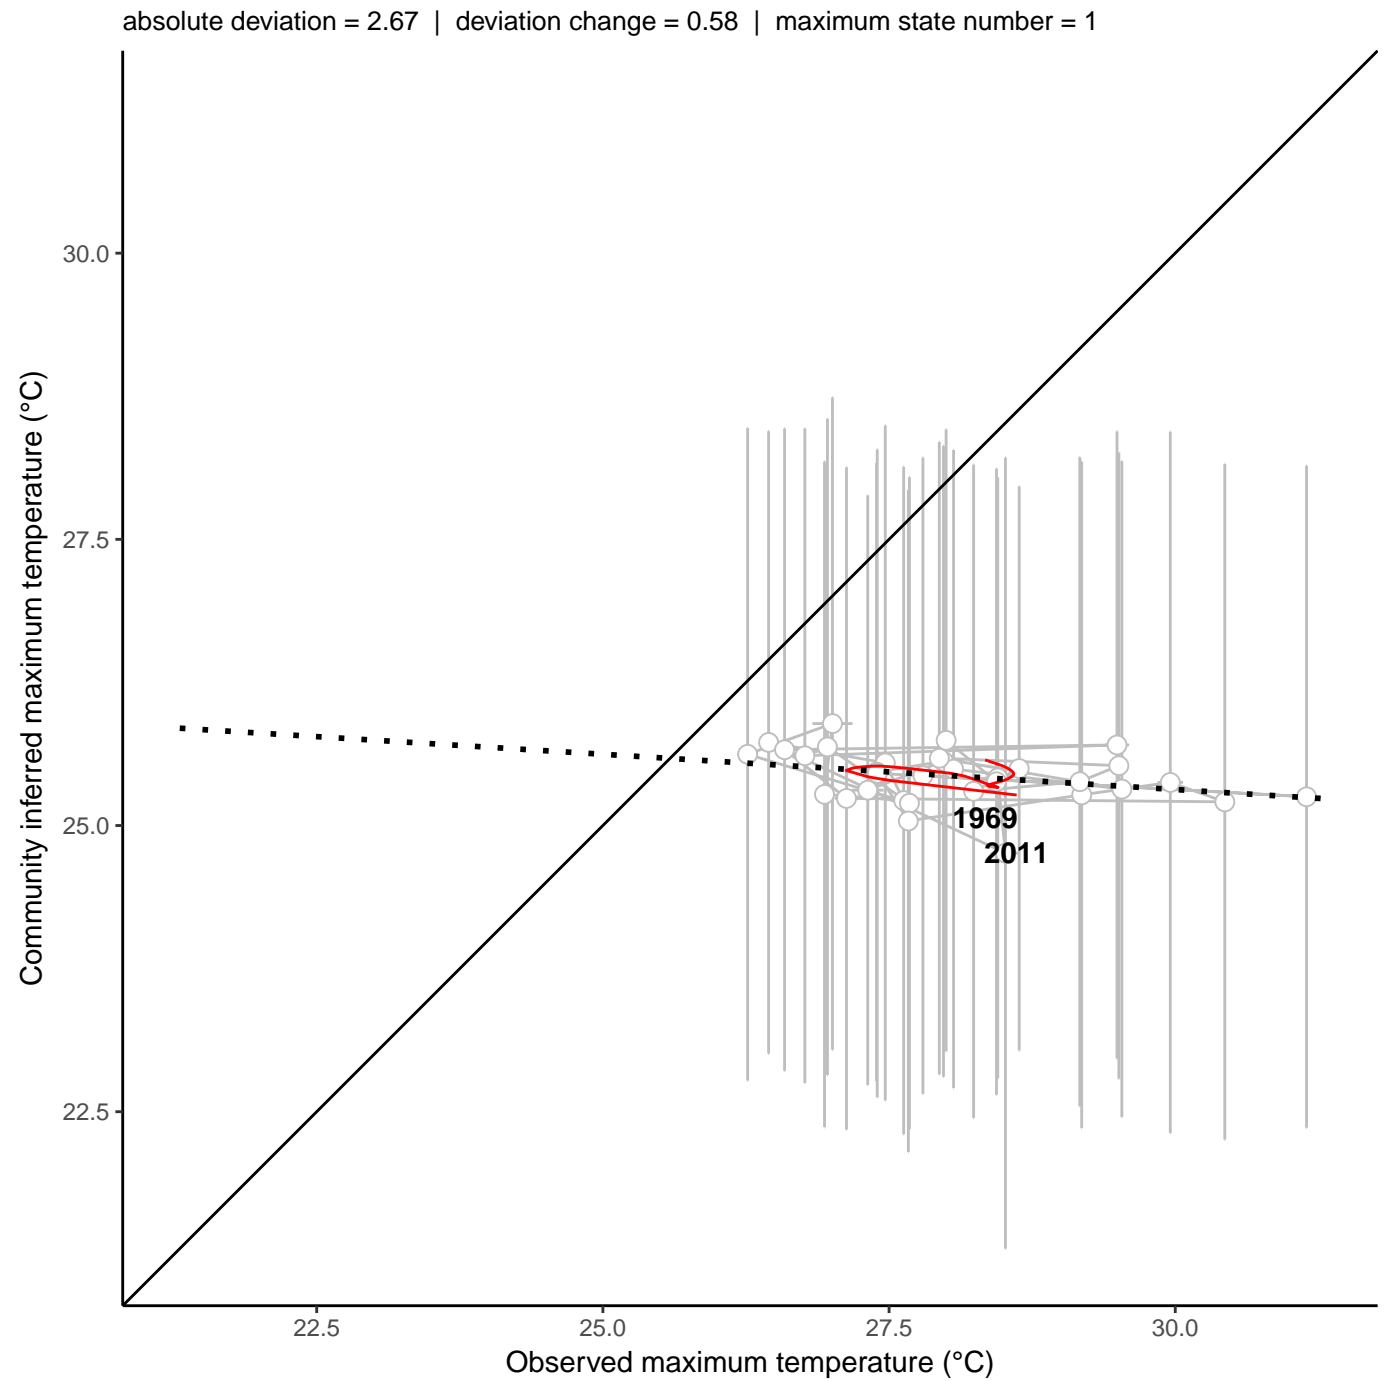

site : 840\_53\_23

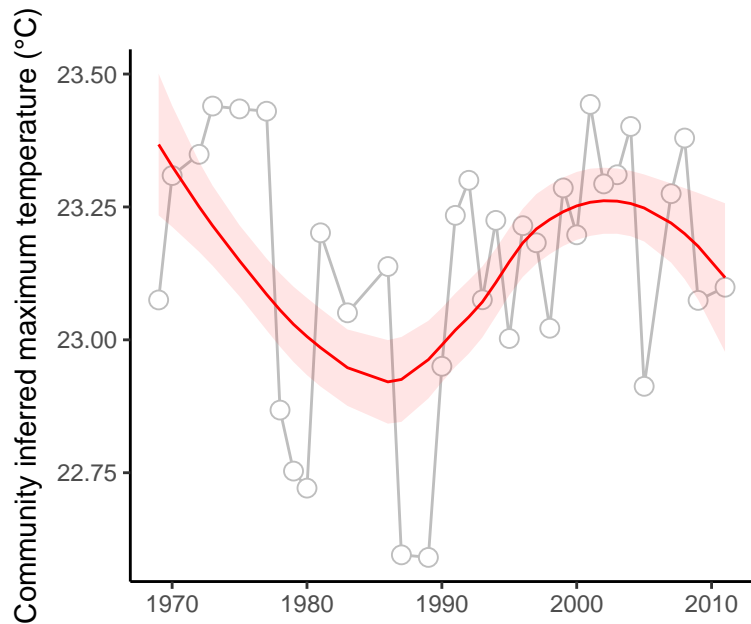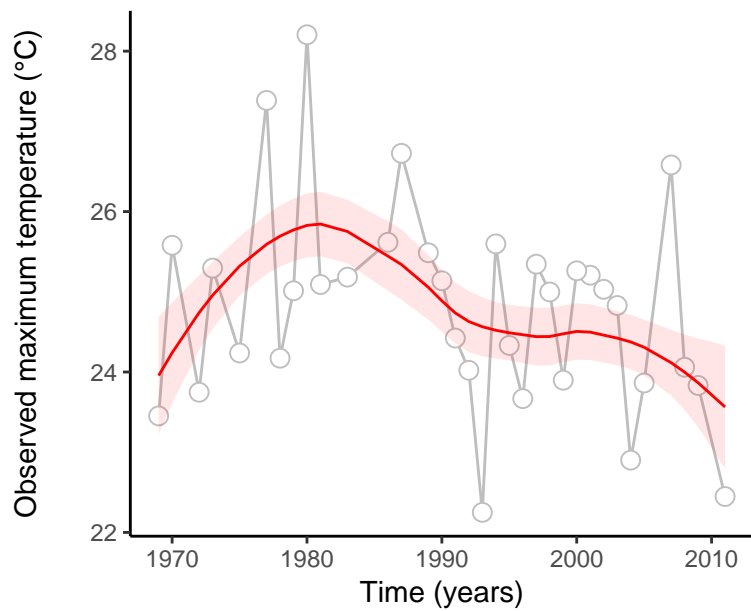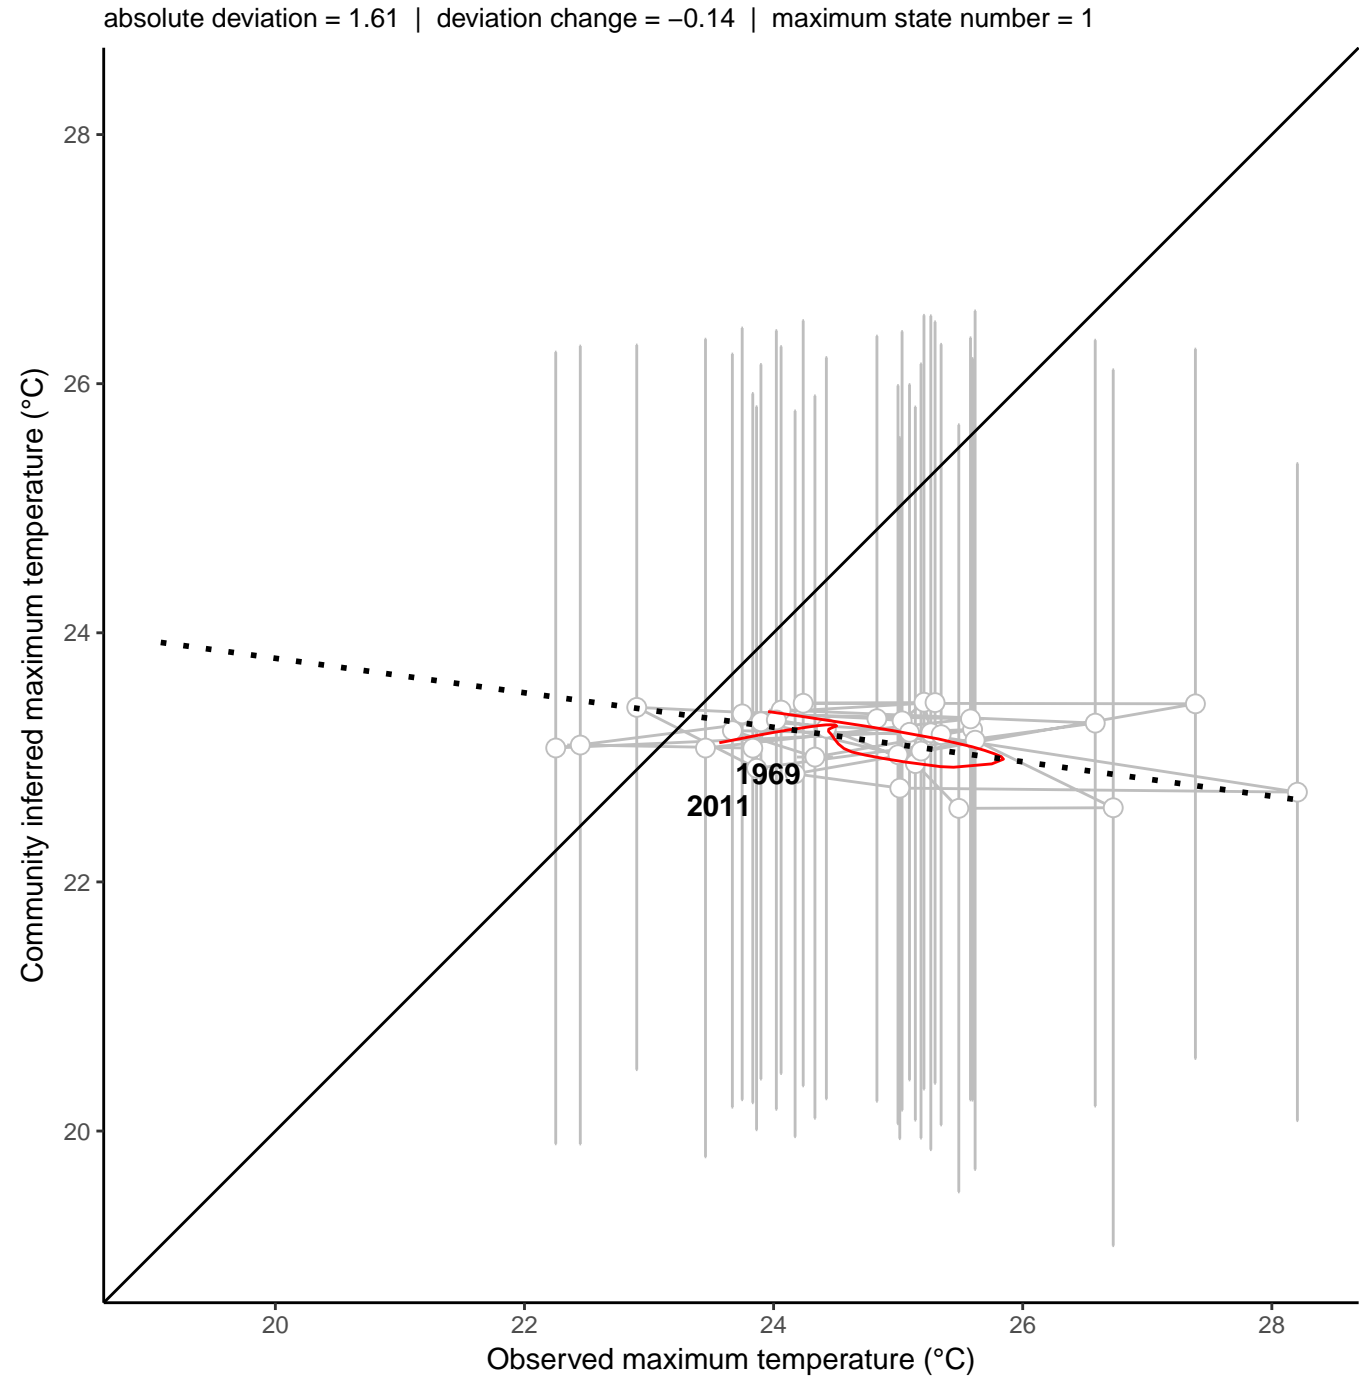

site : 840\_54\_1

absolute deviation = 3.32 | deviation change = -0.15 | maximum state number = 1

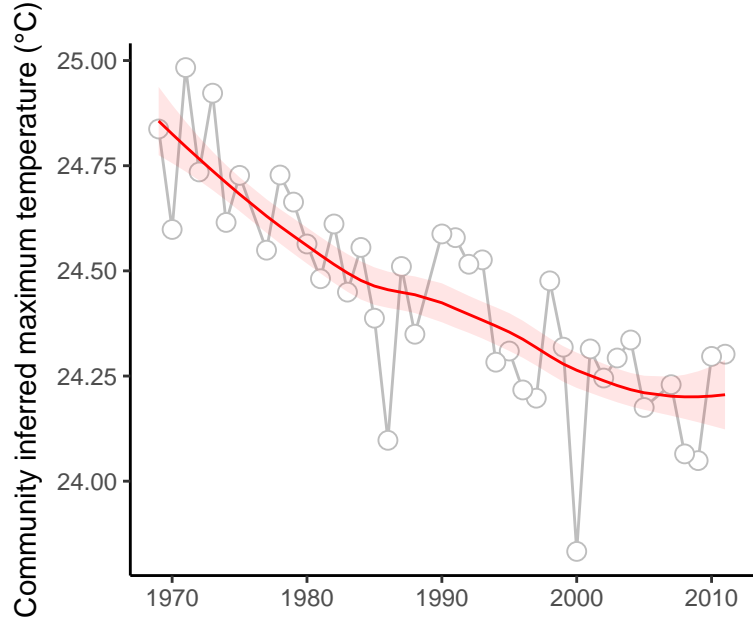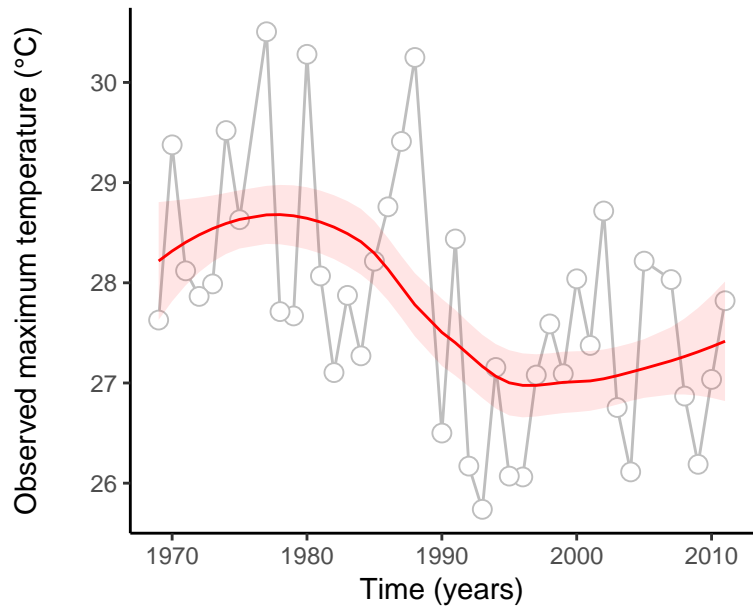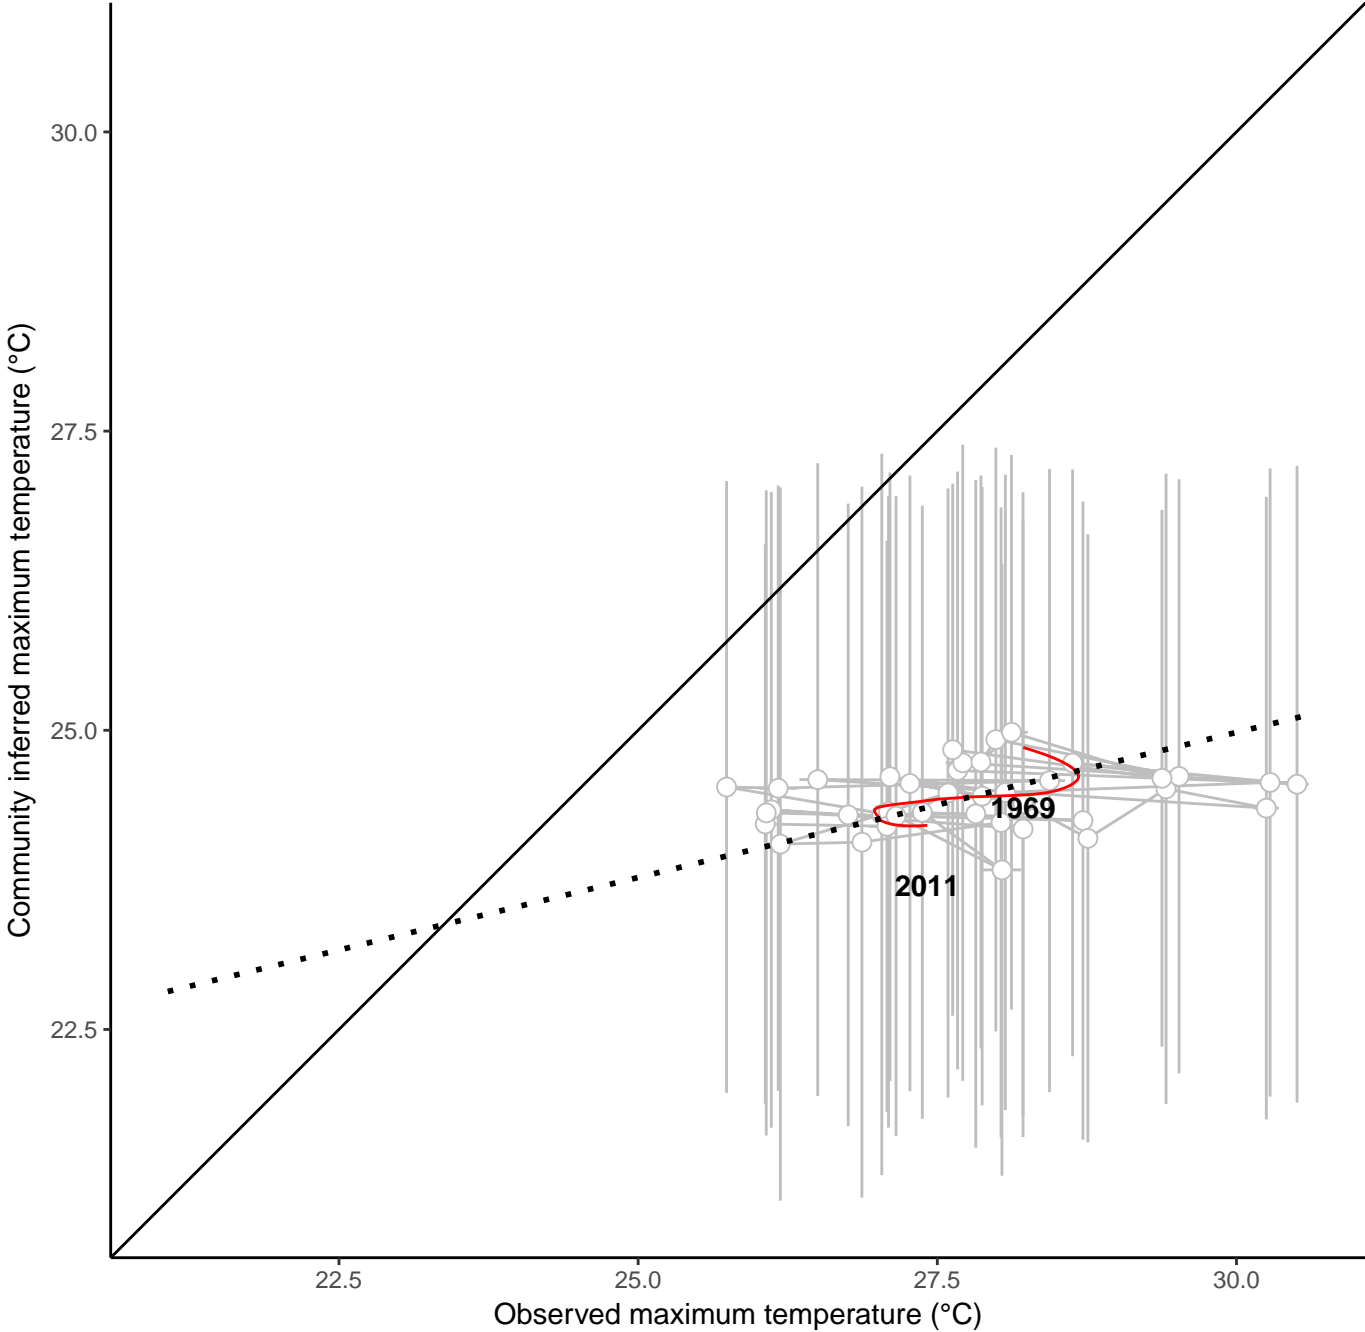

site : 840\_58\_10

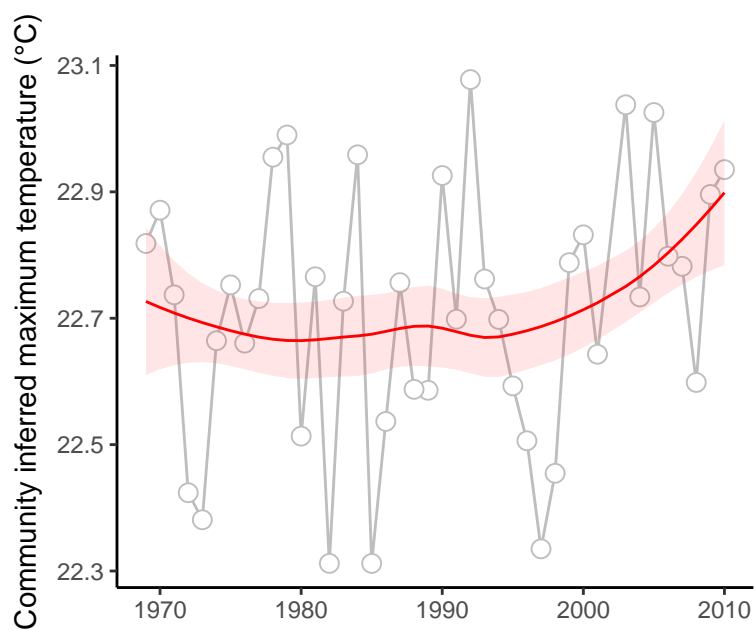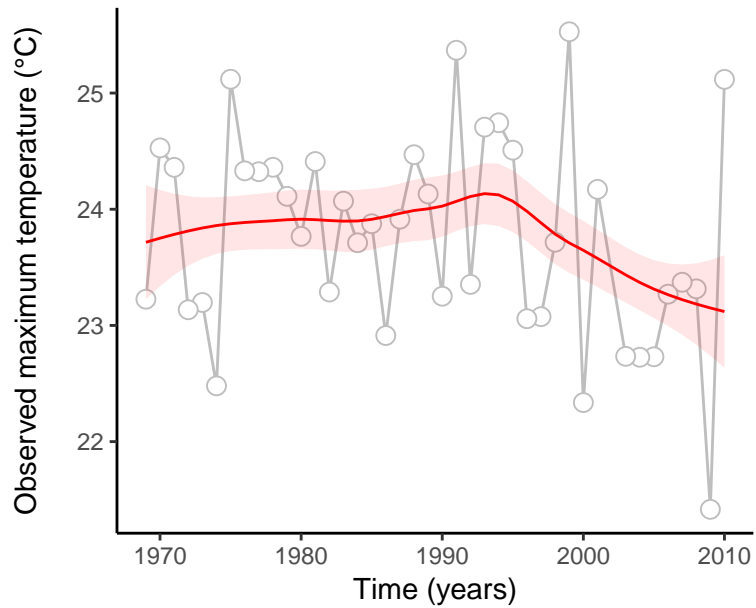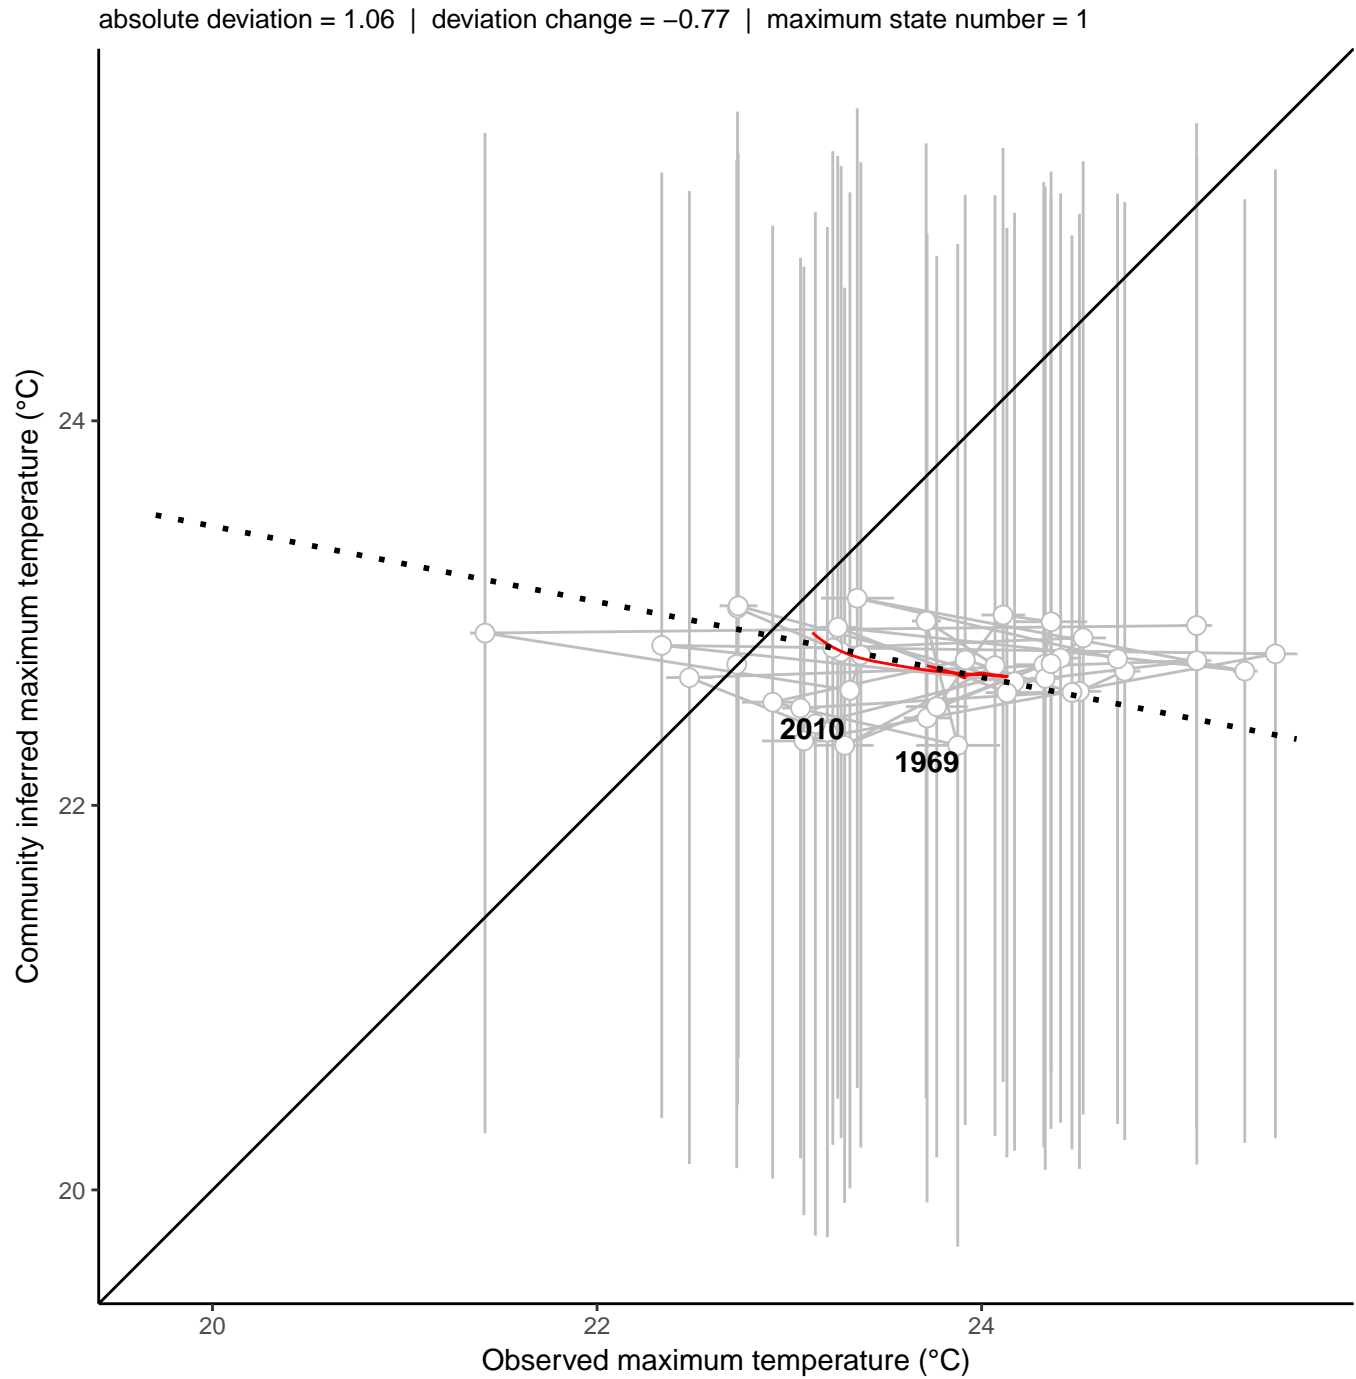

site : 840\_64\_9

absolute deviation = 1.07 | deviation change = 0.18 | maximum state number = 1

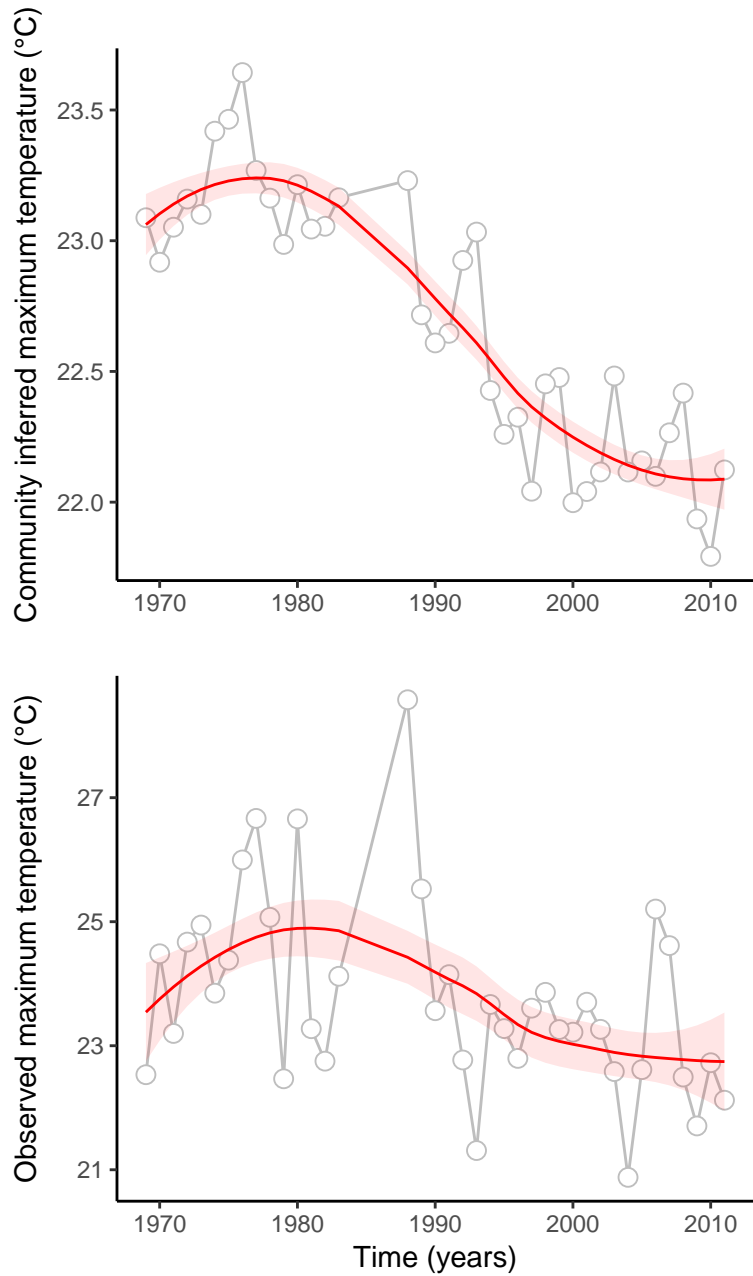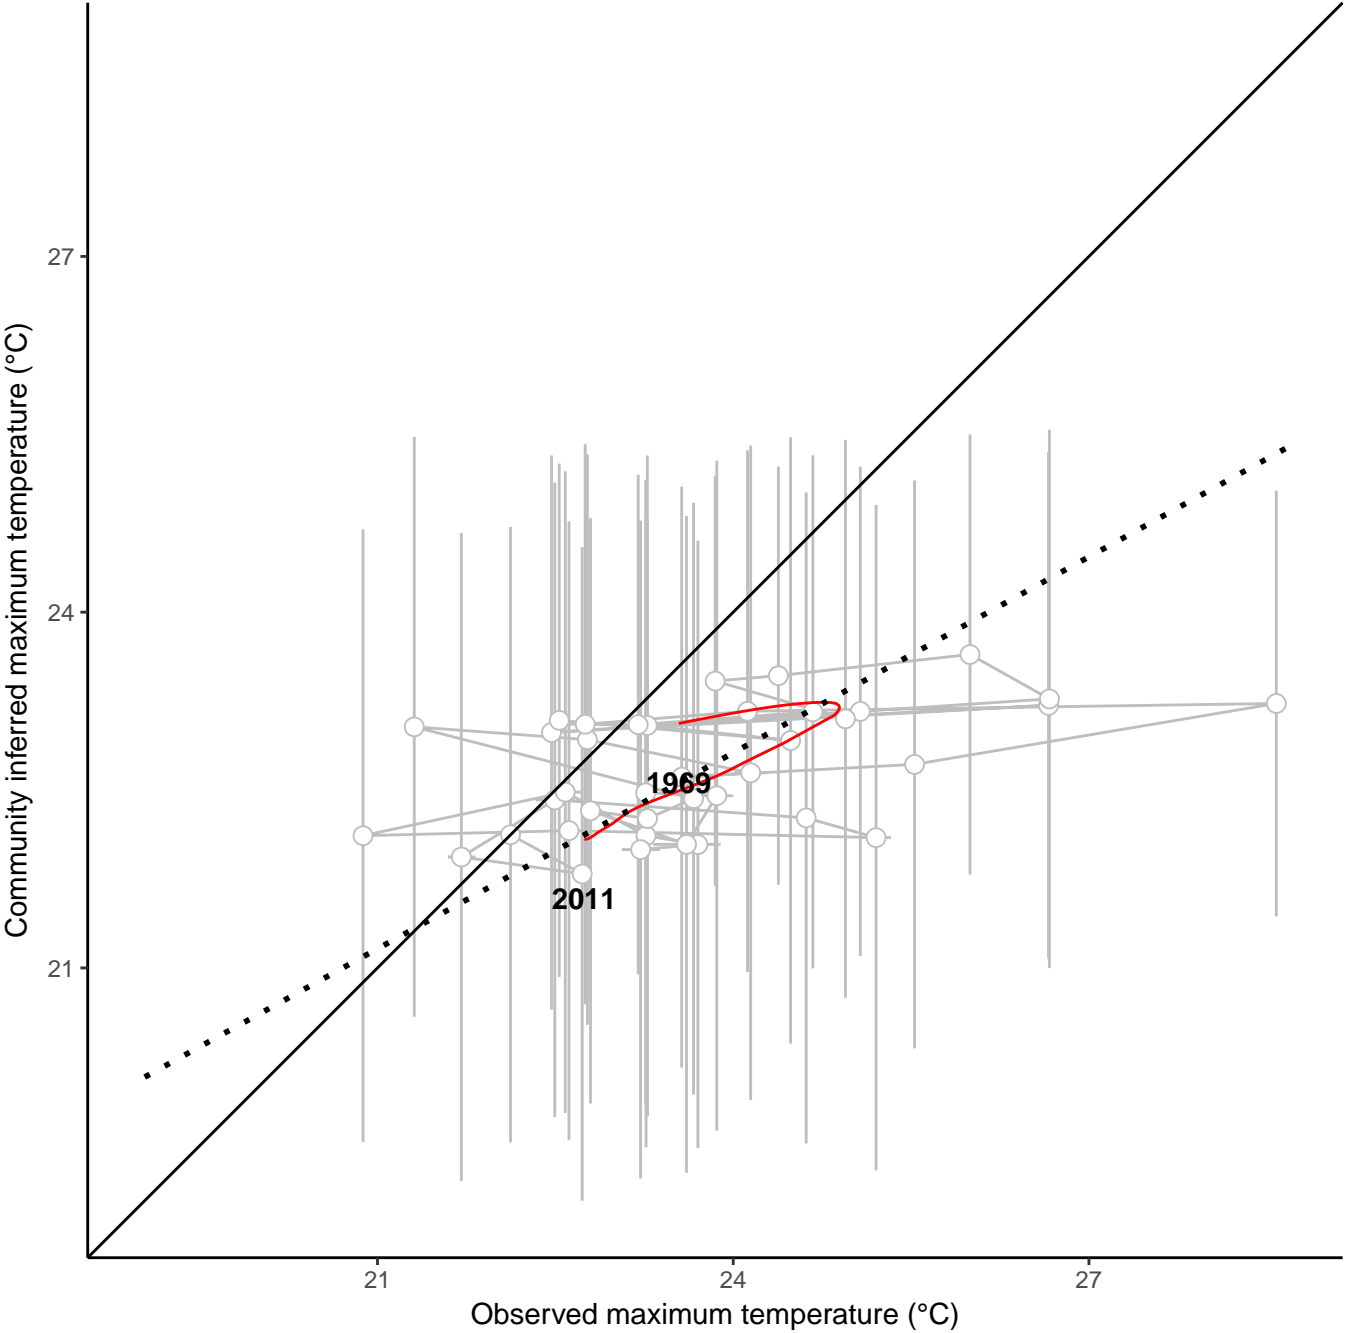

site : 840\_72\_13

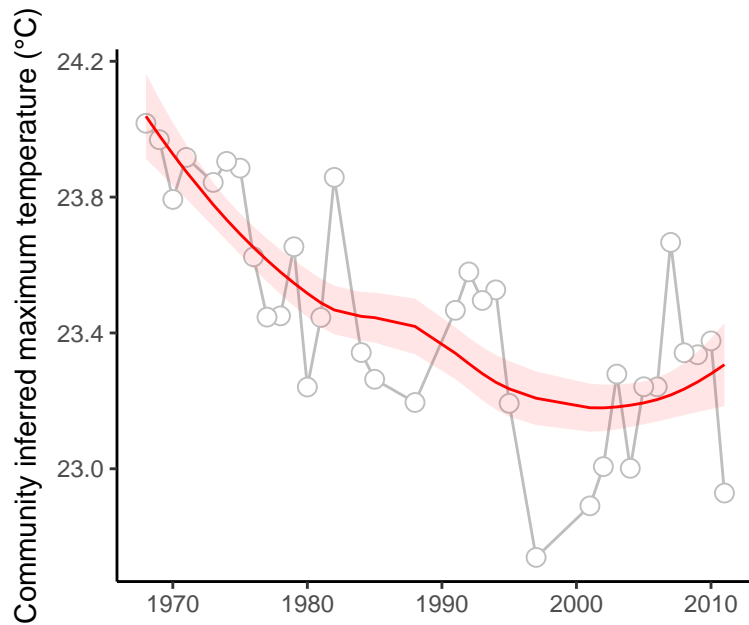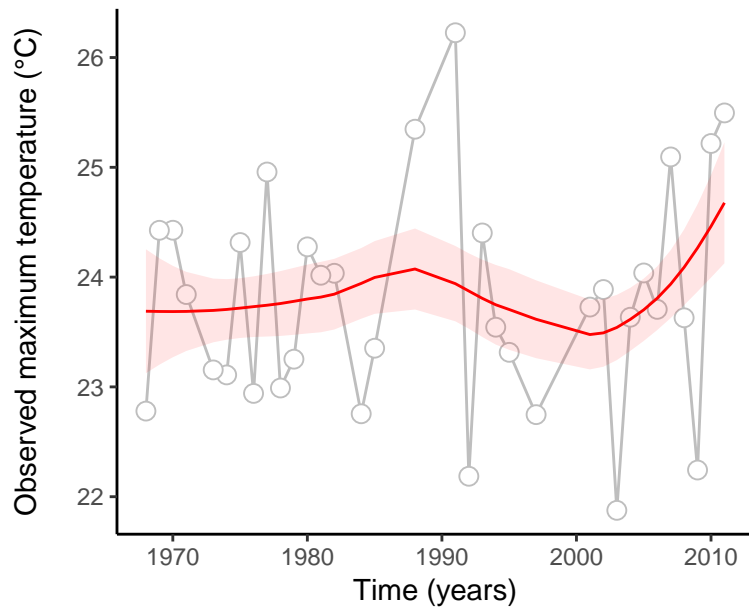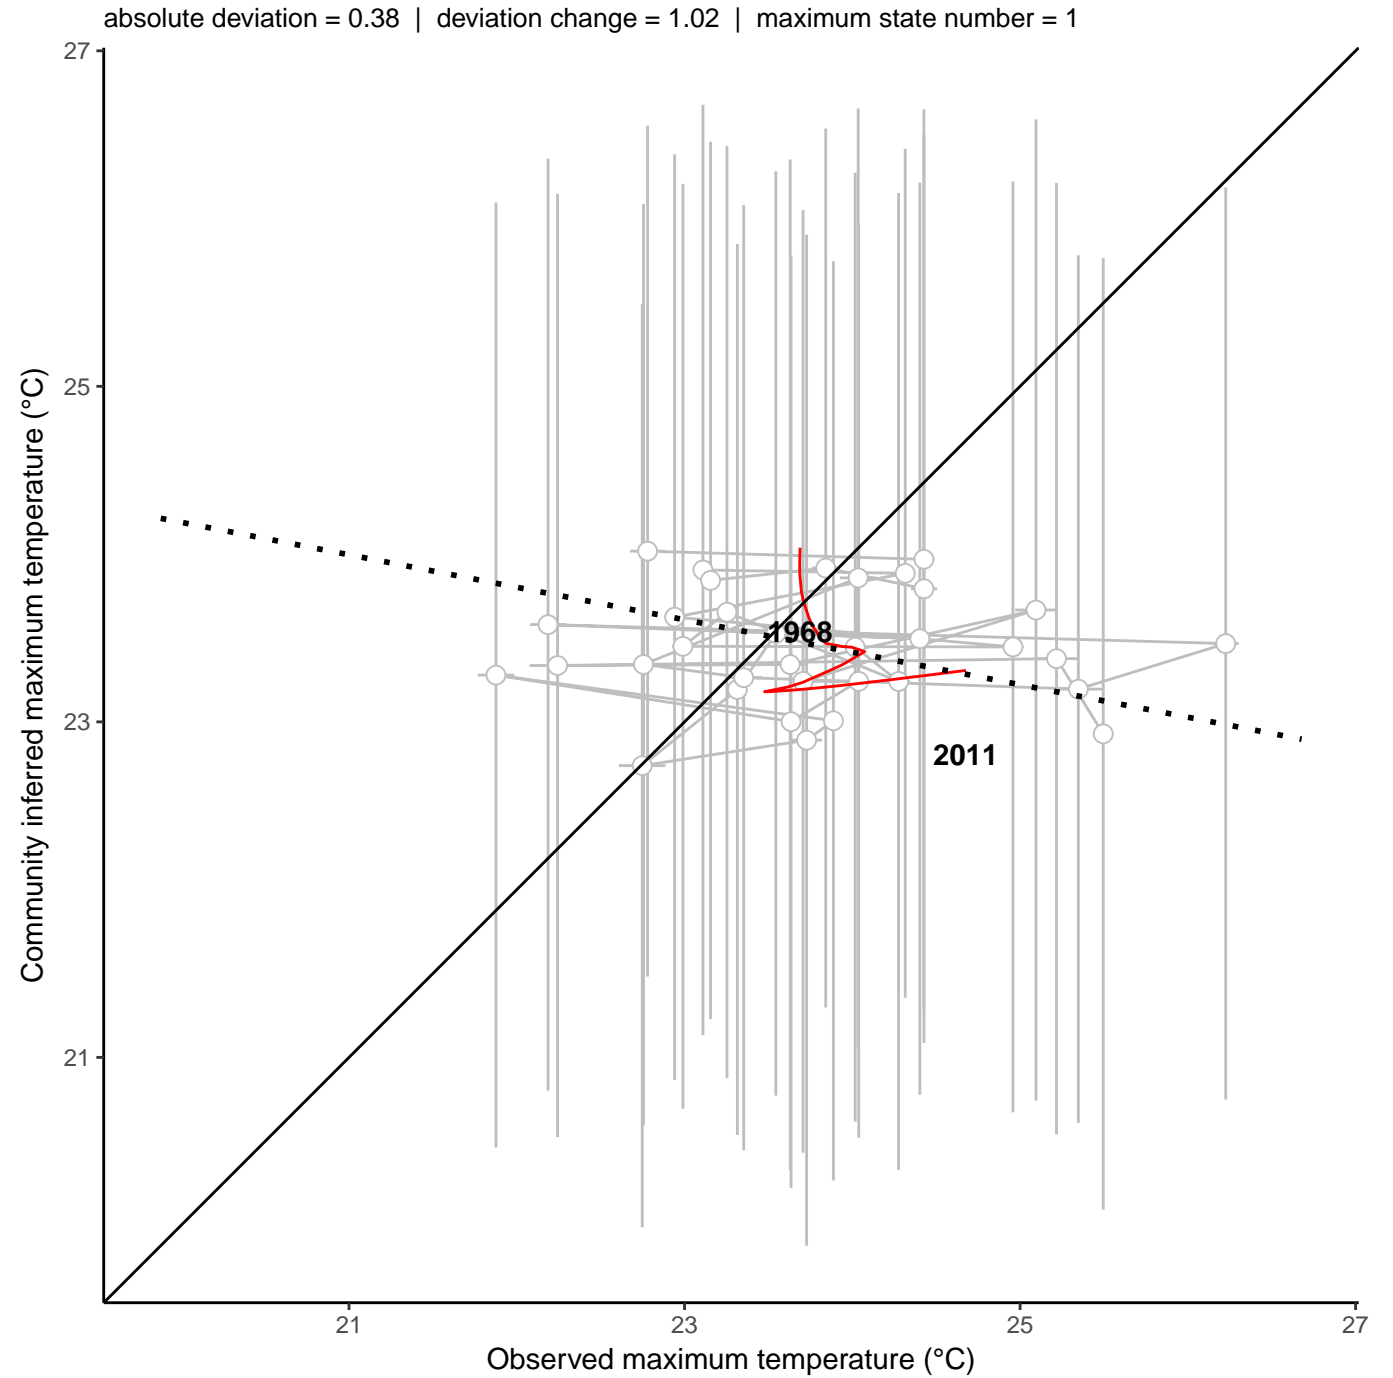

site : 840\_83\_42

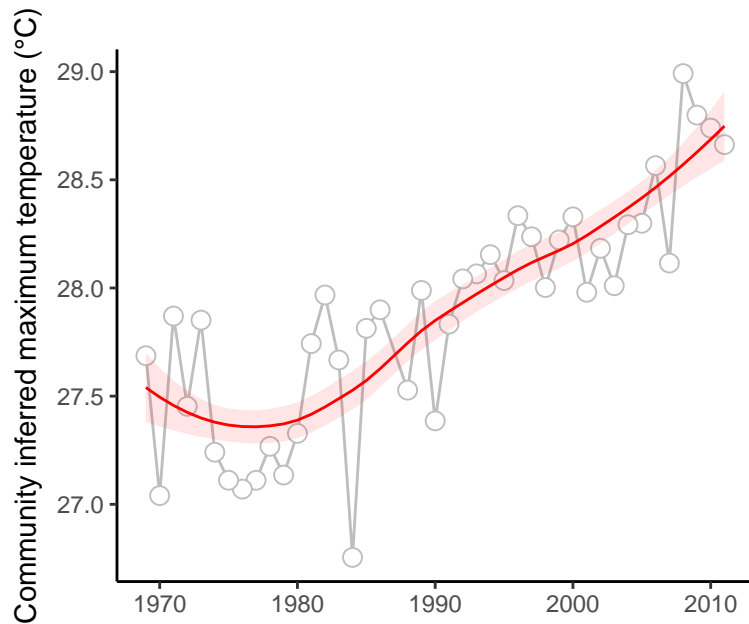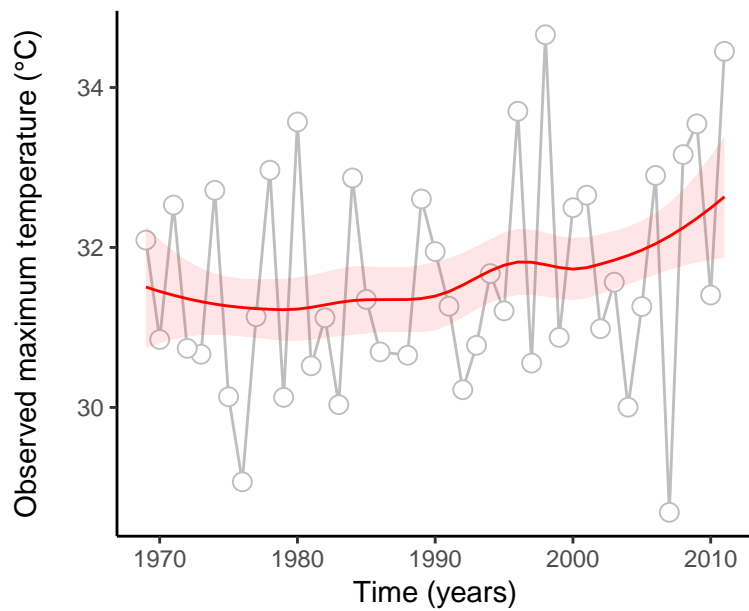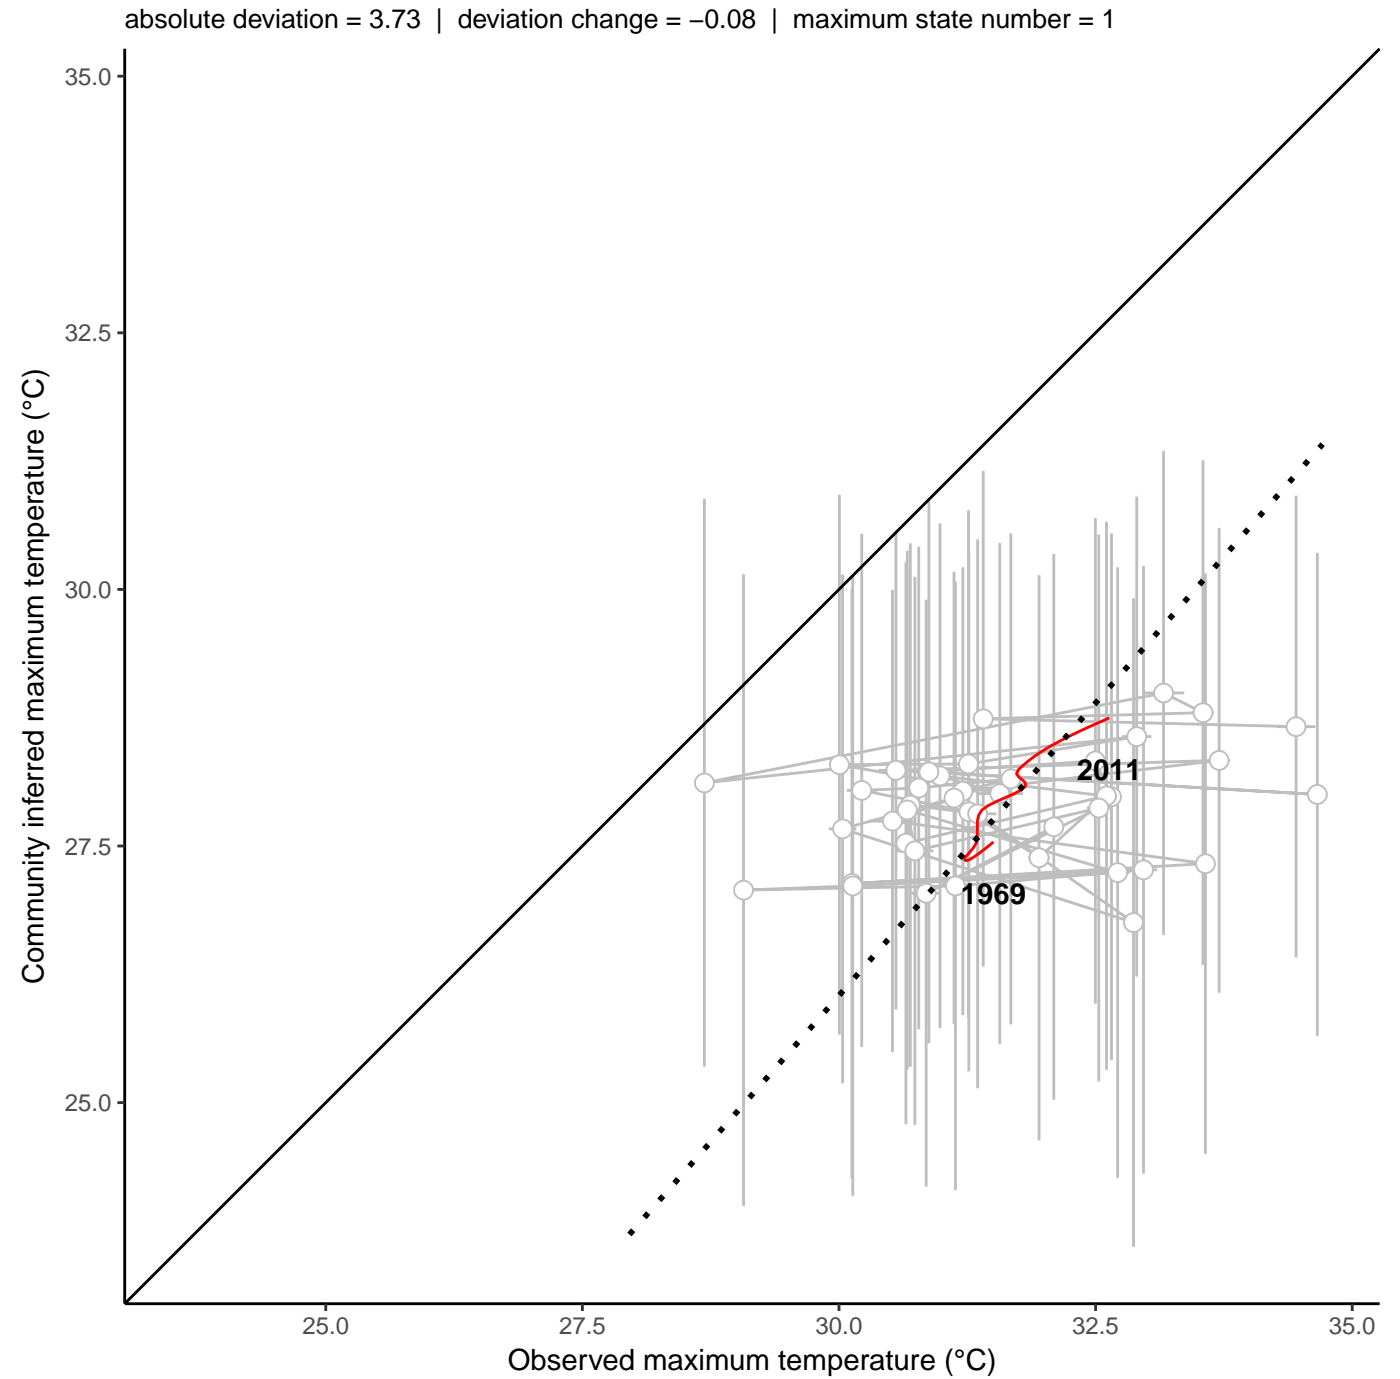



site : 840\_83\_54

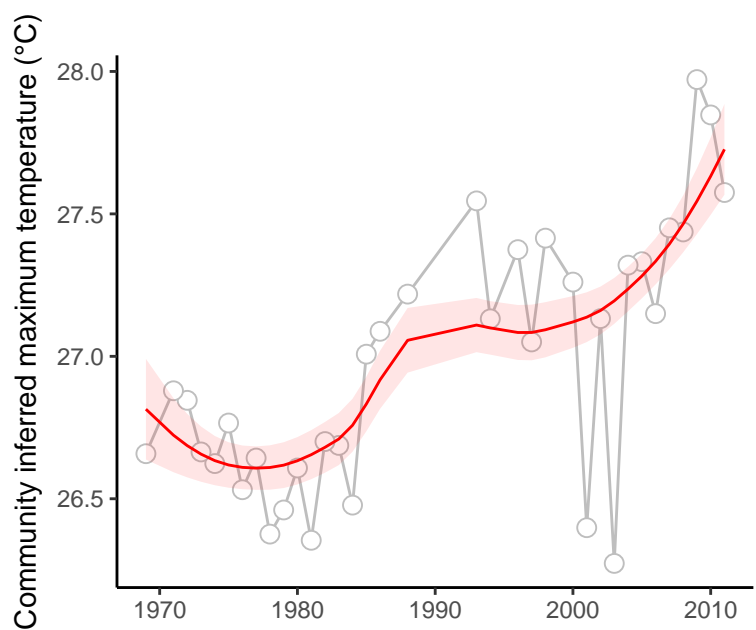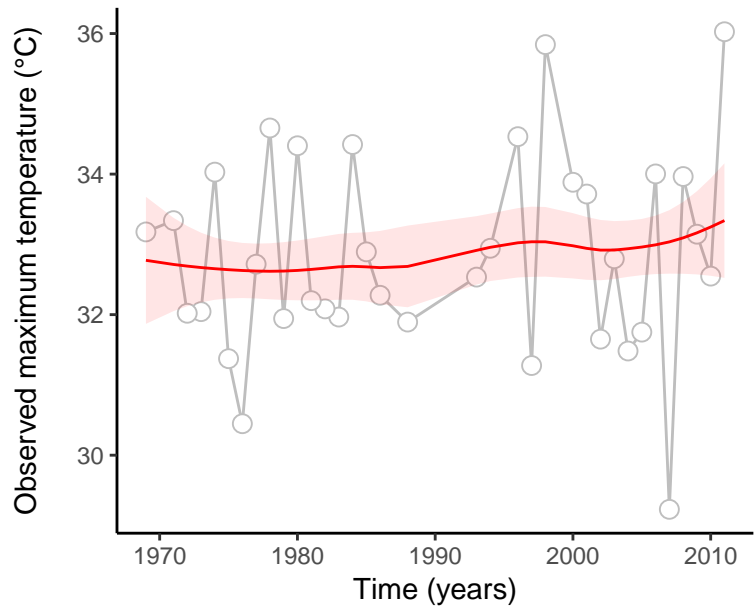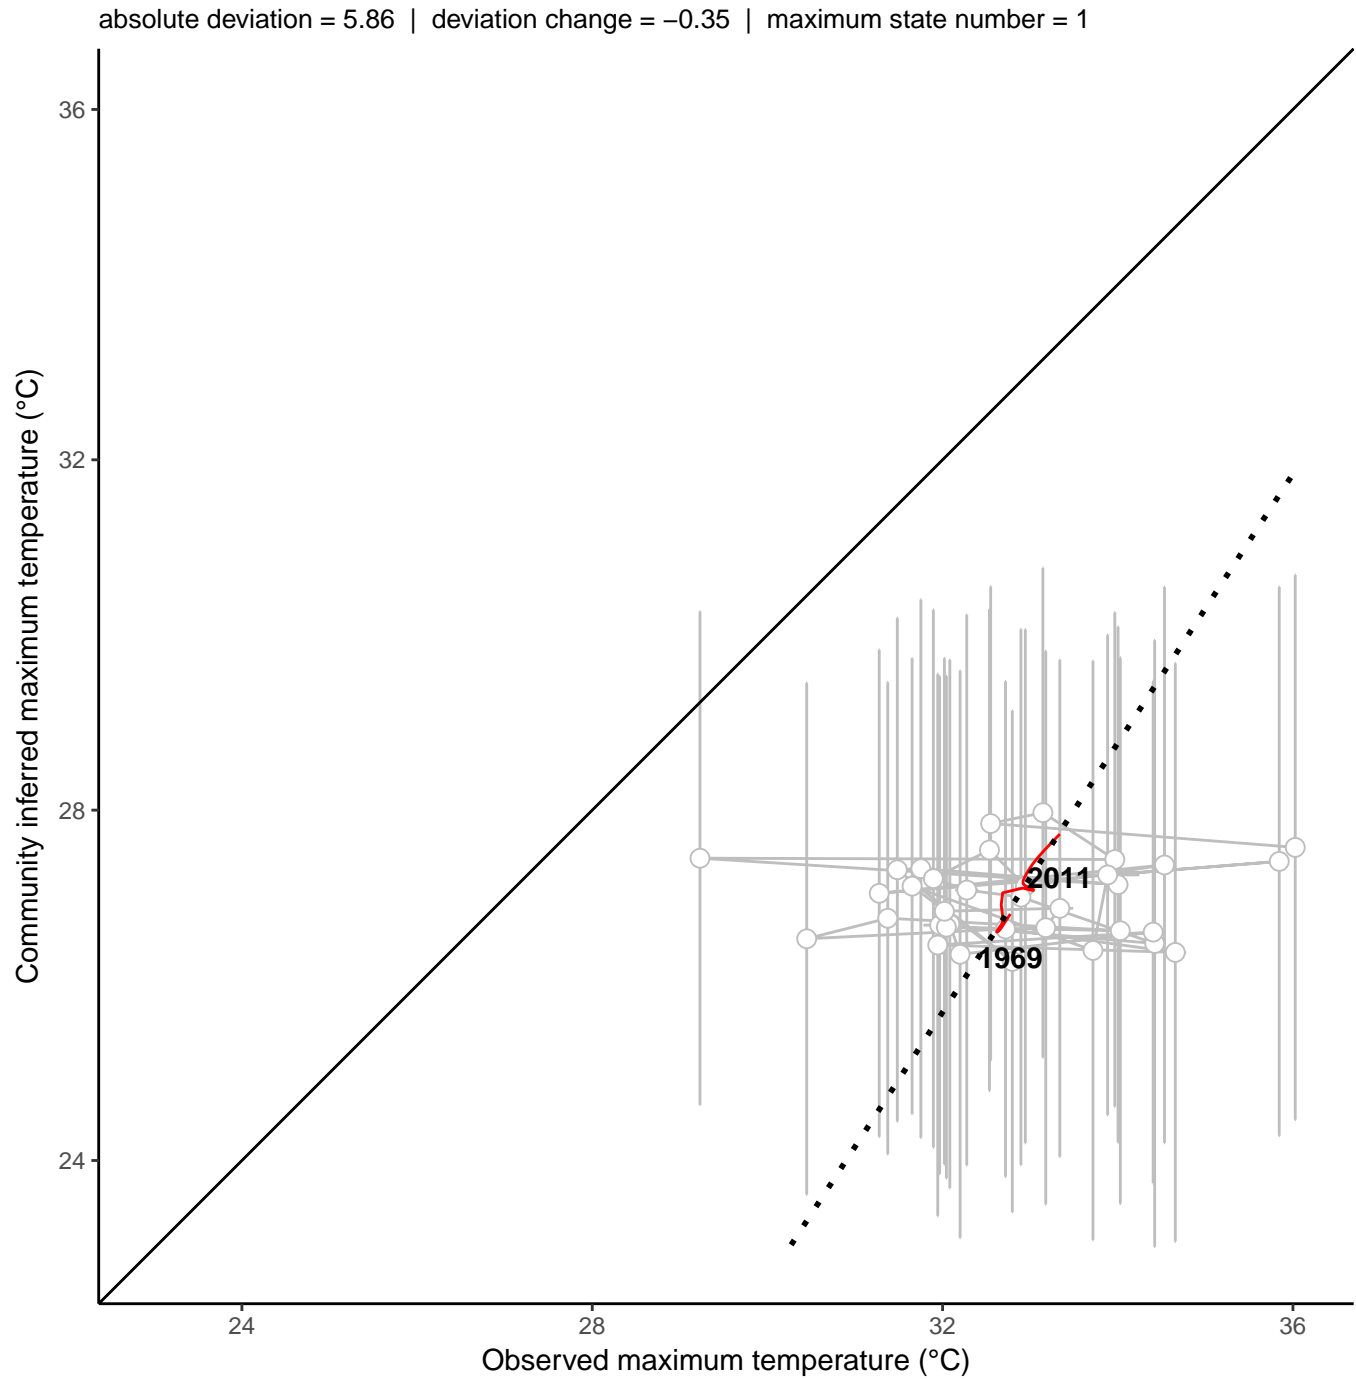

site : 840\_83\_67

absolute deviation = 5.67 | deviation change = 1.62 | maximum state number = 1

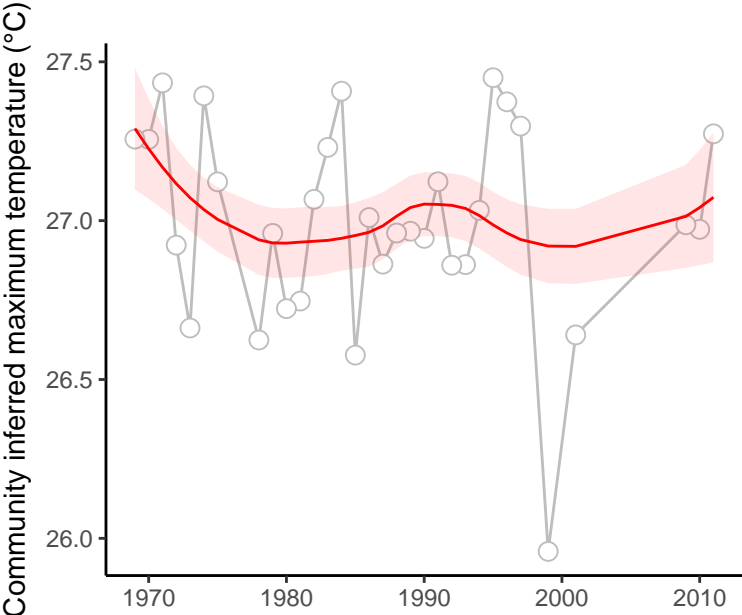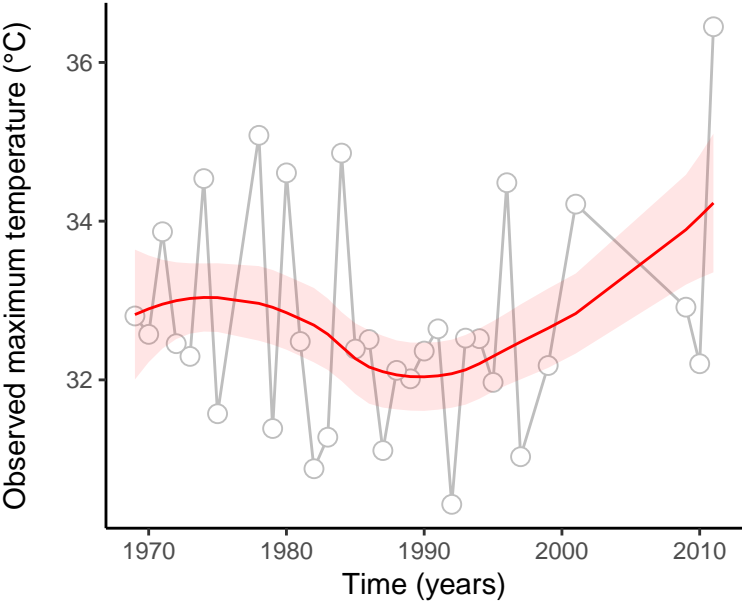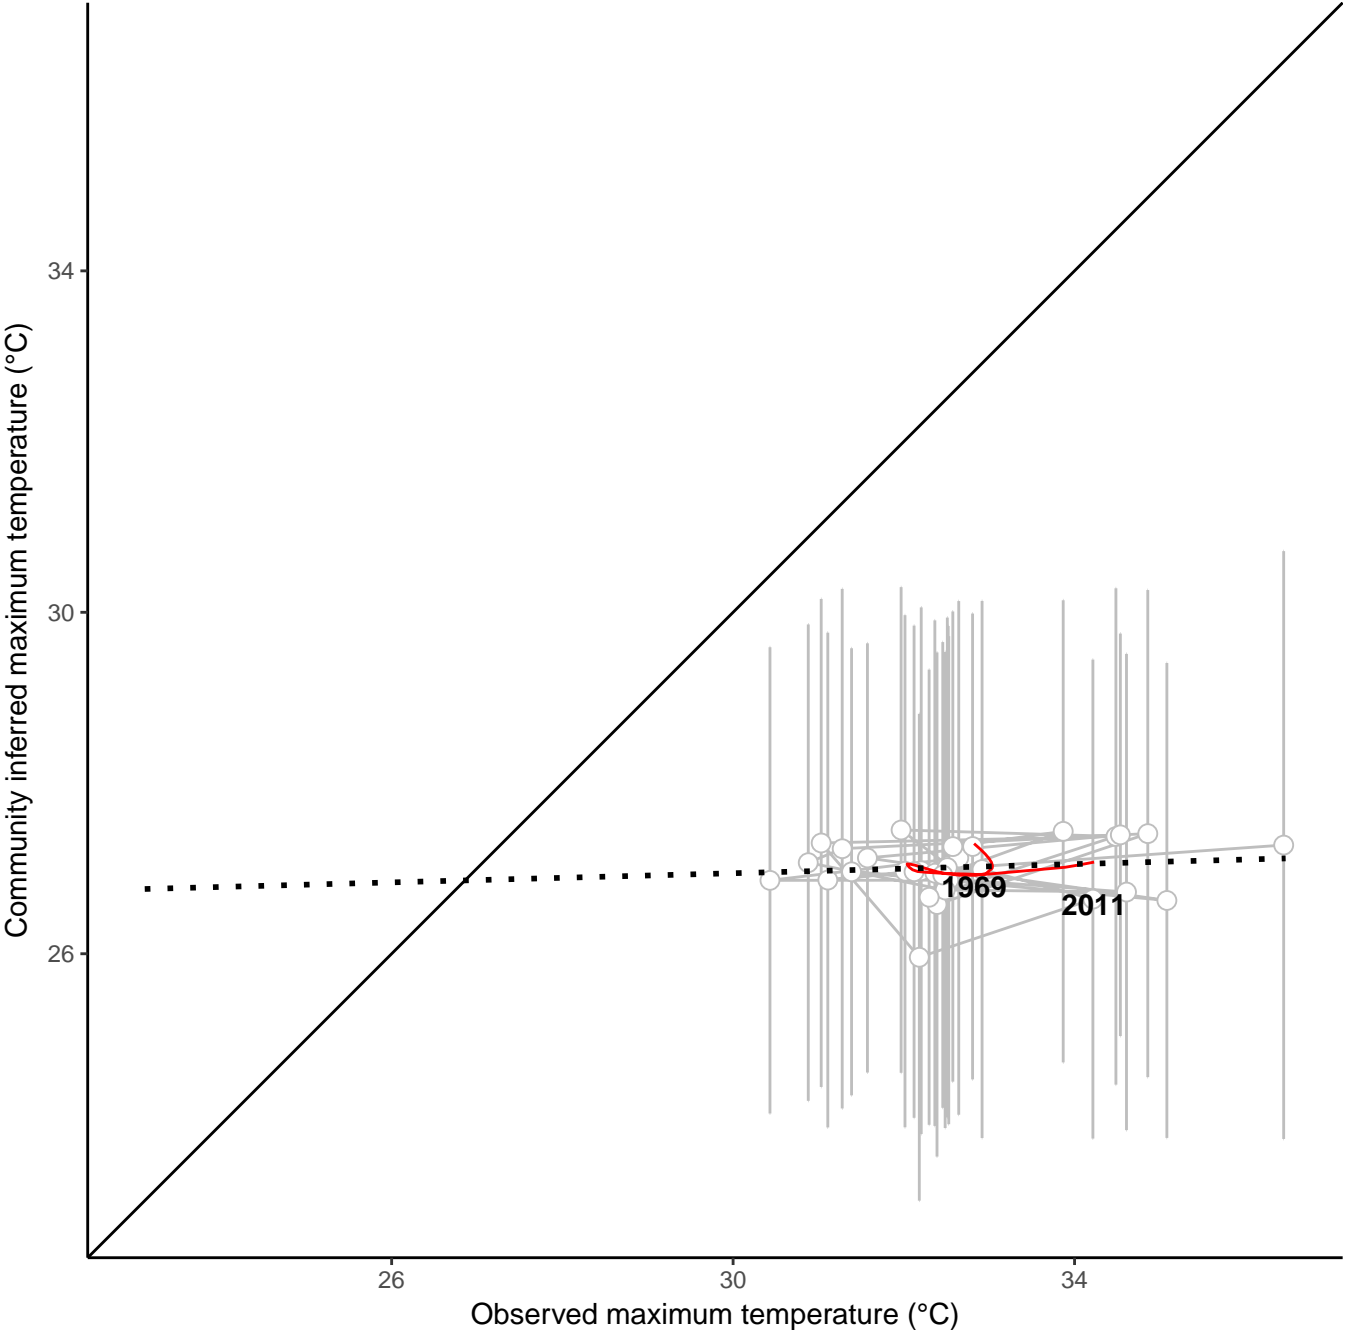

site : 840\_83\_72

absolute deviation = 5.05 | deviation change = 1.27 | maximum state number = 1

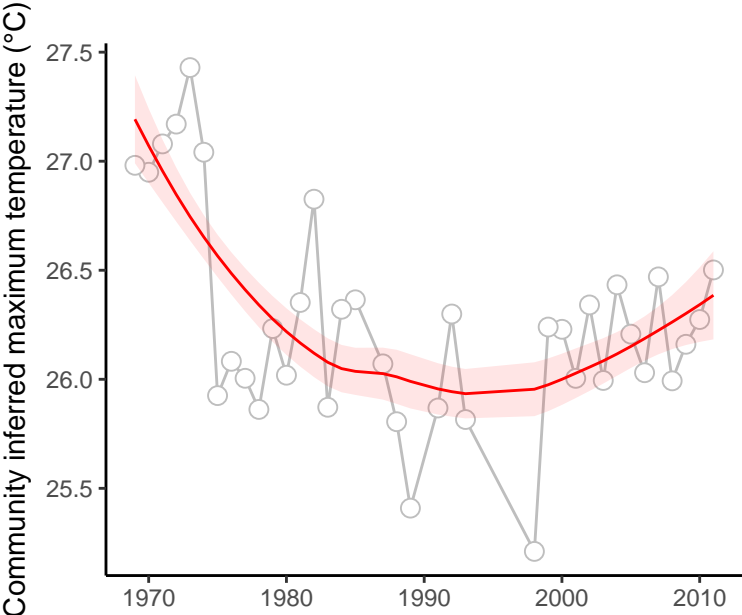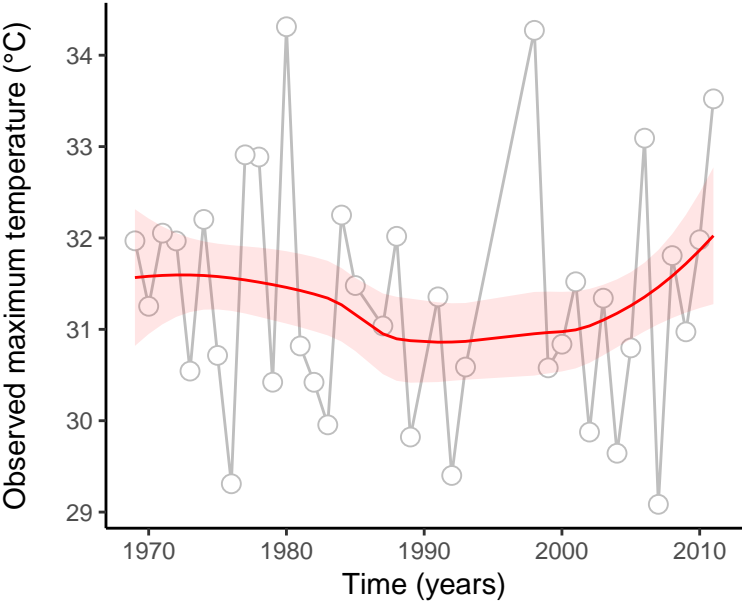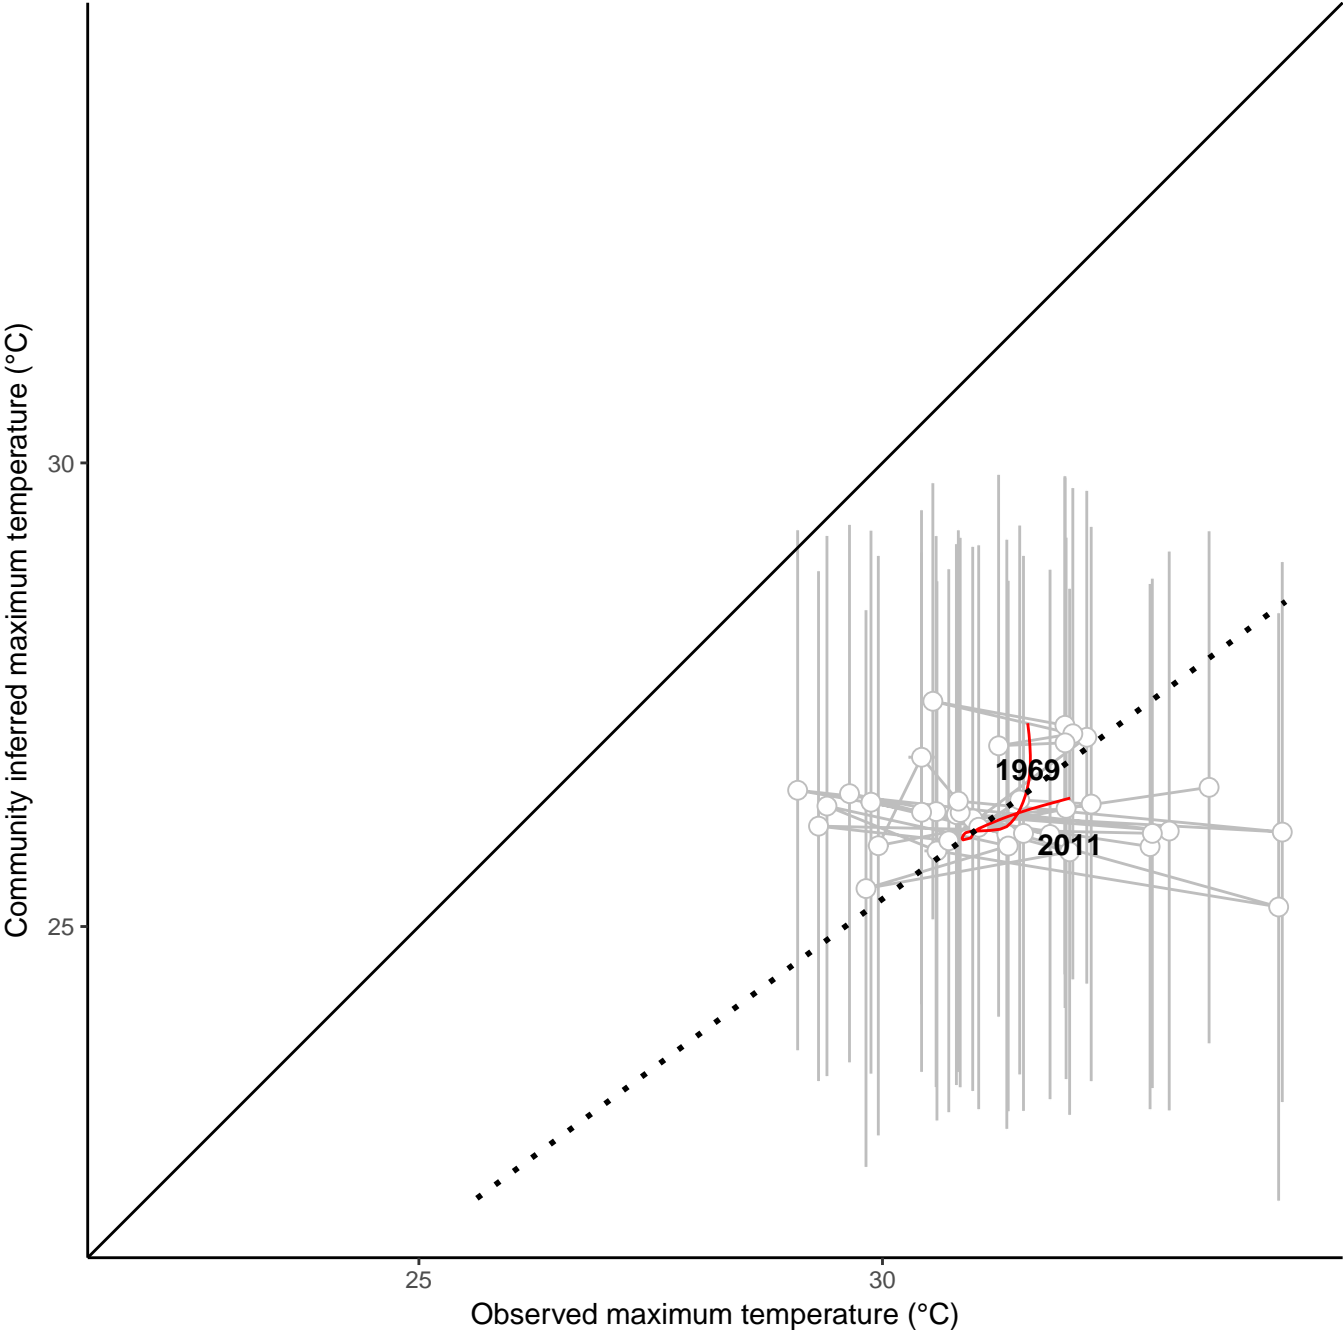

site : 840\_83\_92

absolute deviation = 6.58 | deviation change = 0.52 | maximum state number = 2

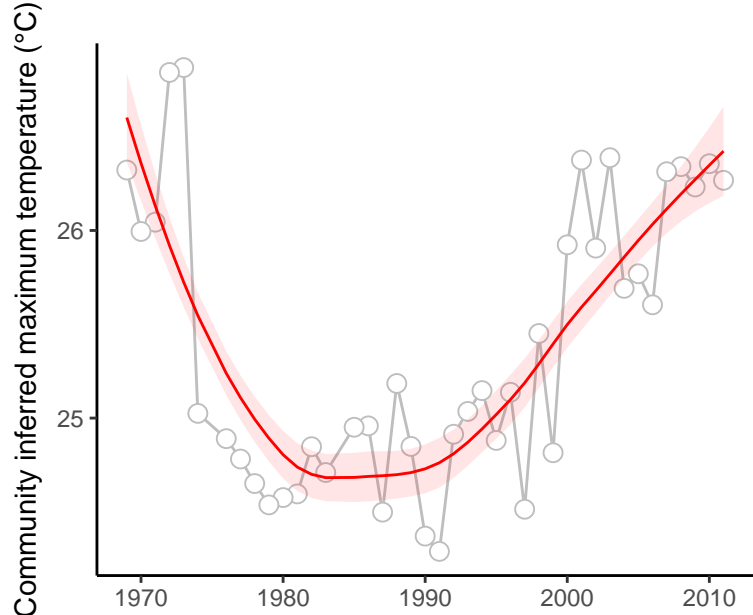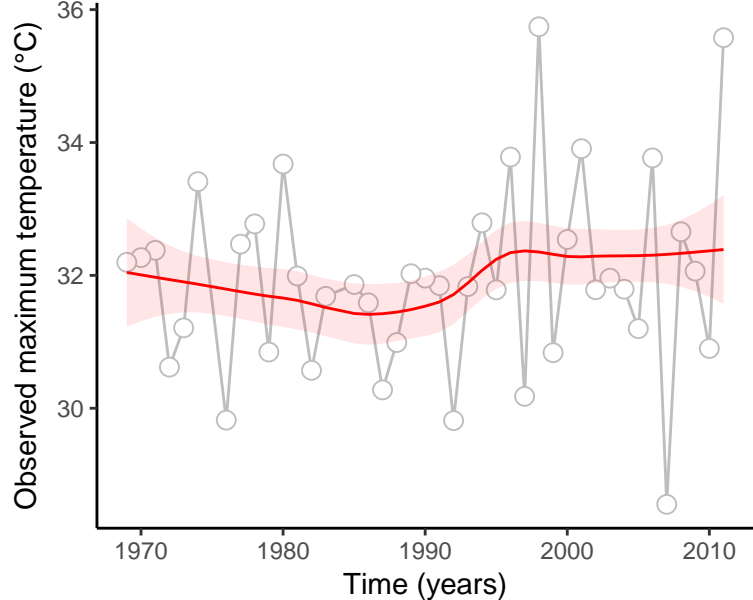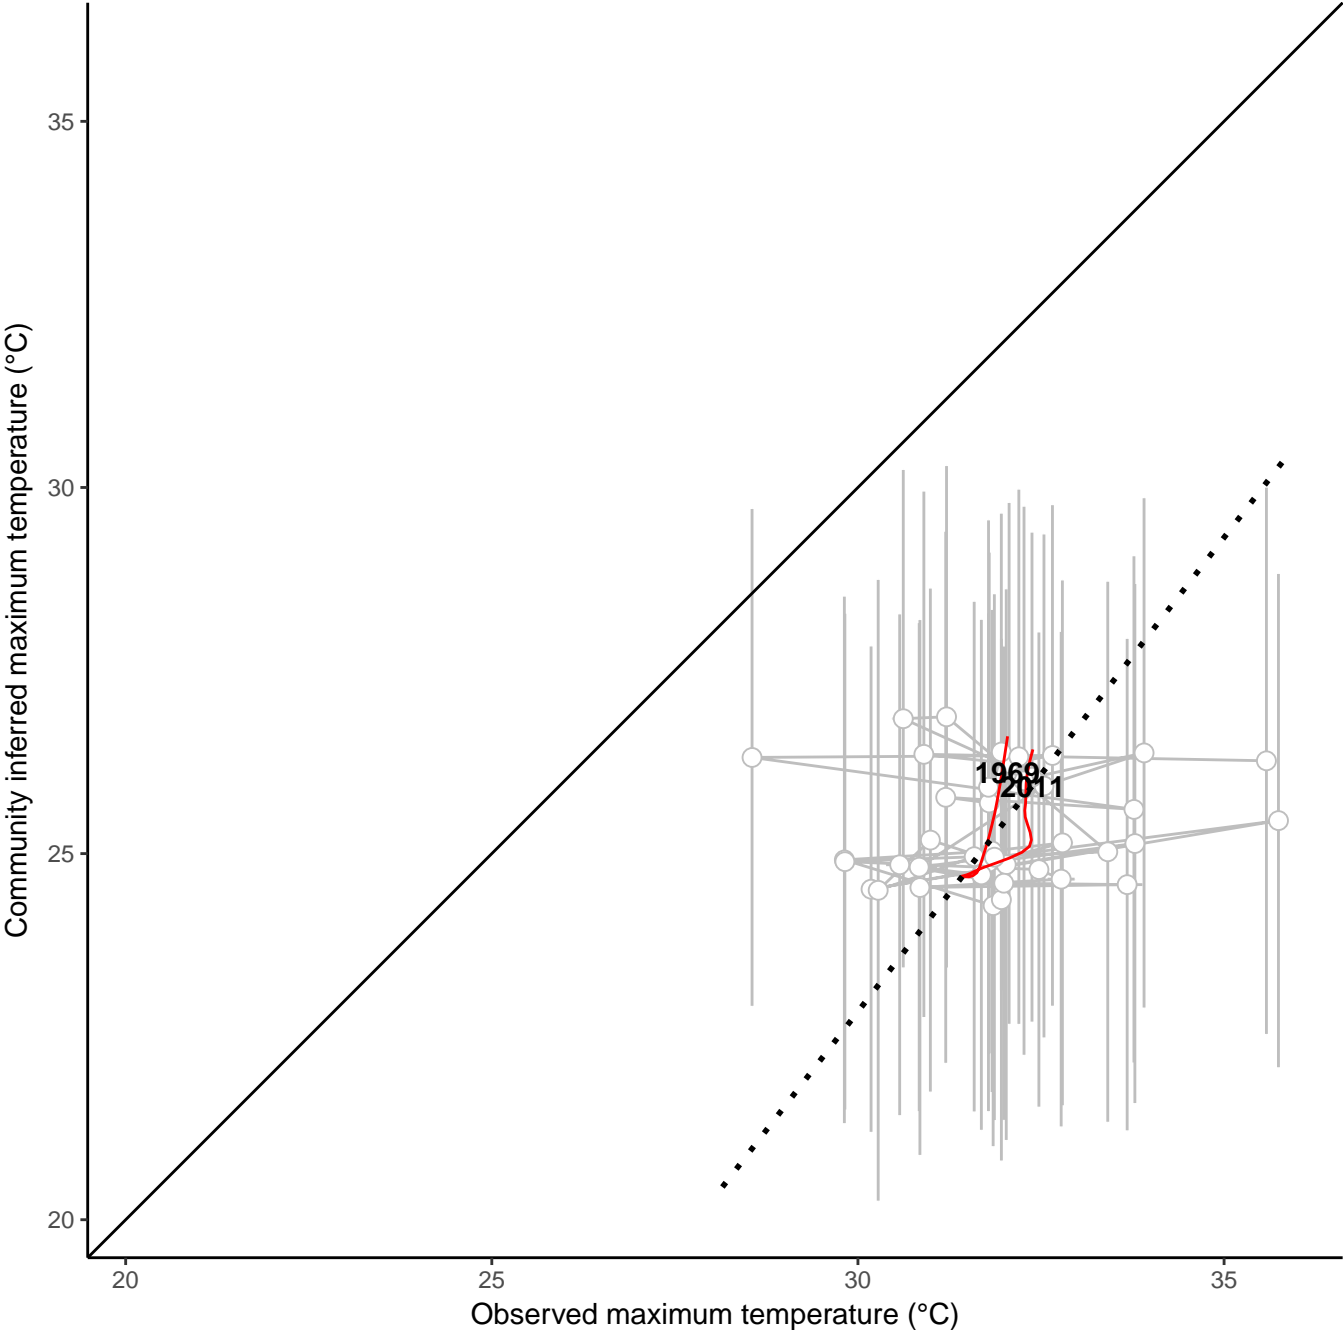

site : 840\_83\_98

absolute deviation = 6.02 | deviation change = 1.53 | maximum state number = 1

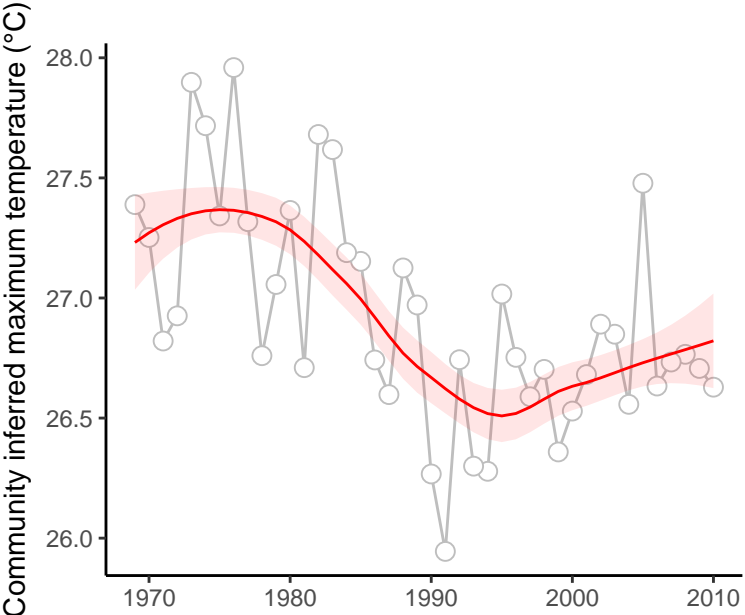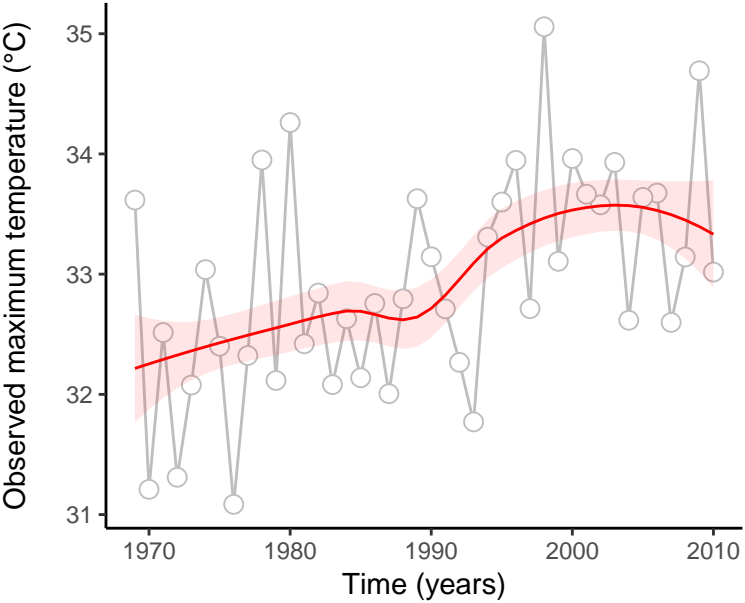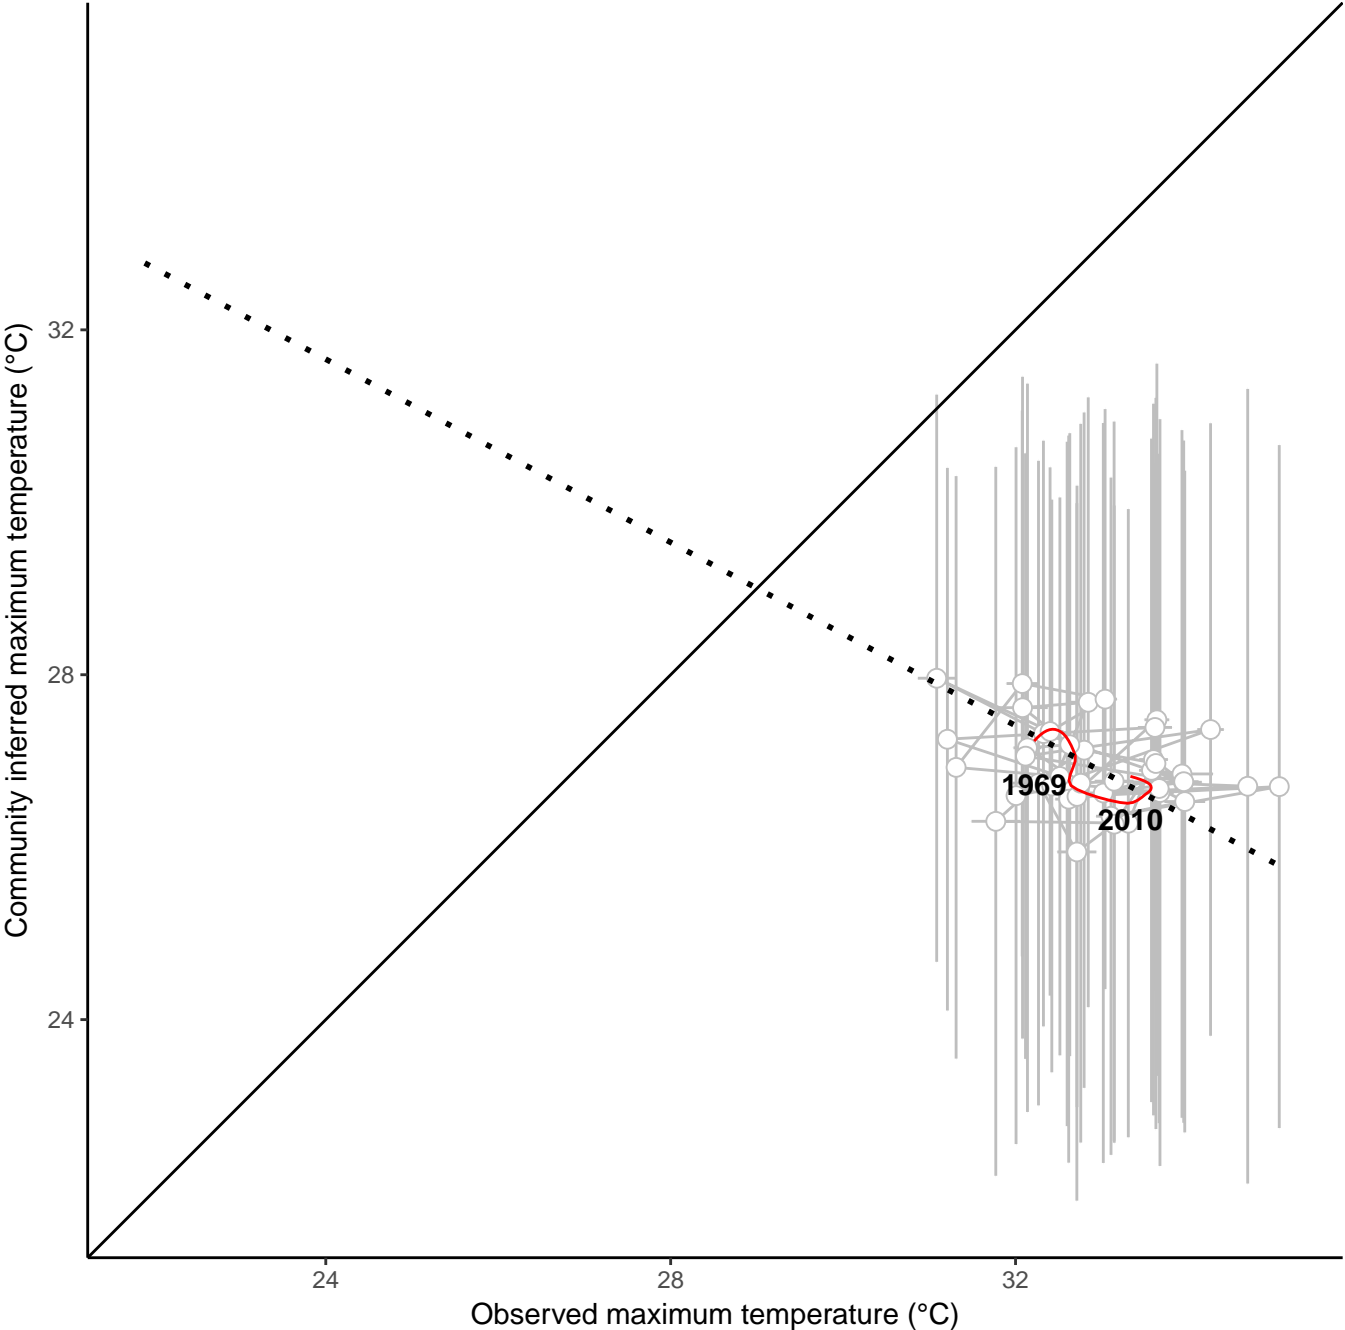

site : 840\_92\_17

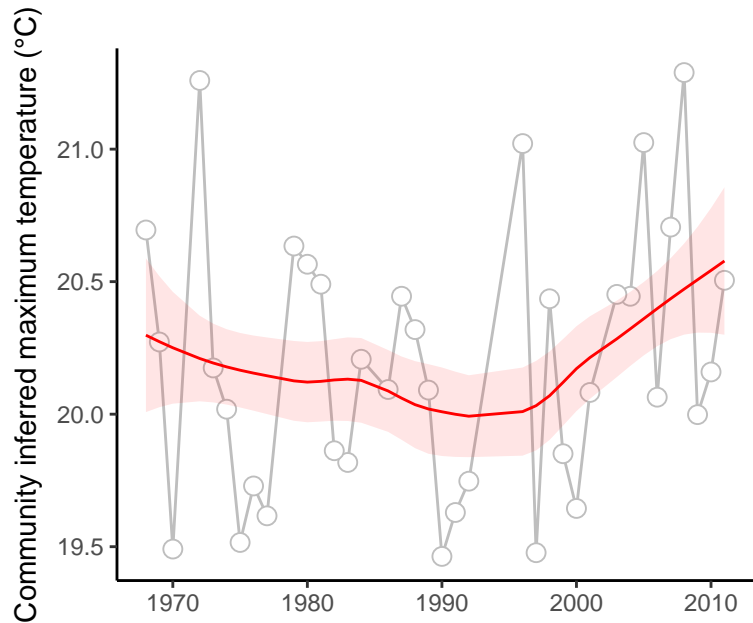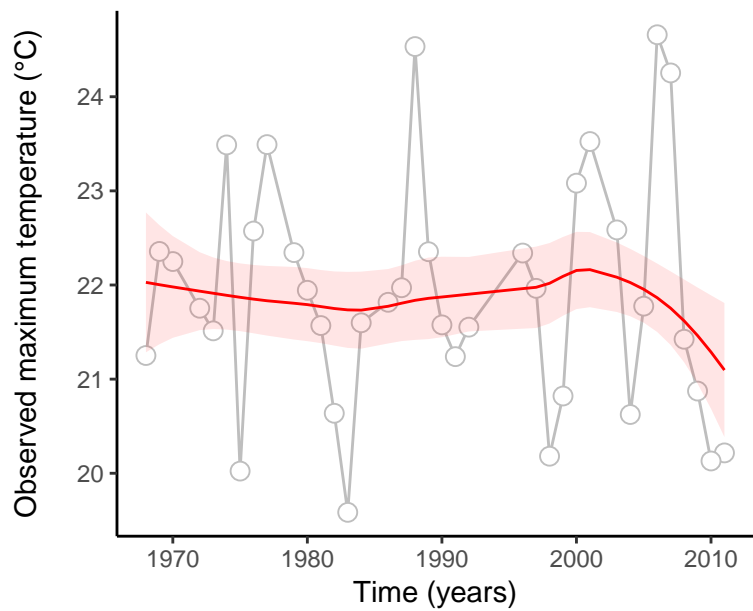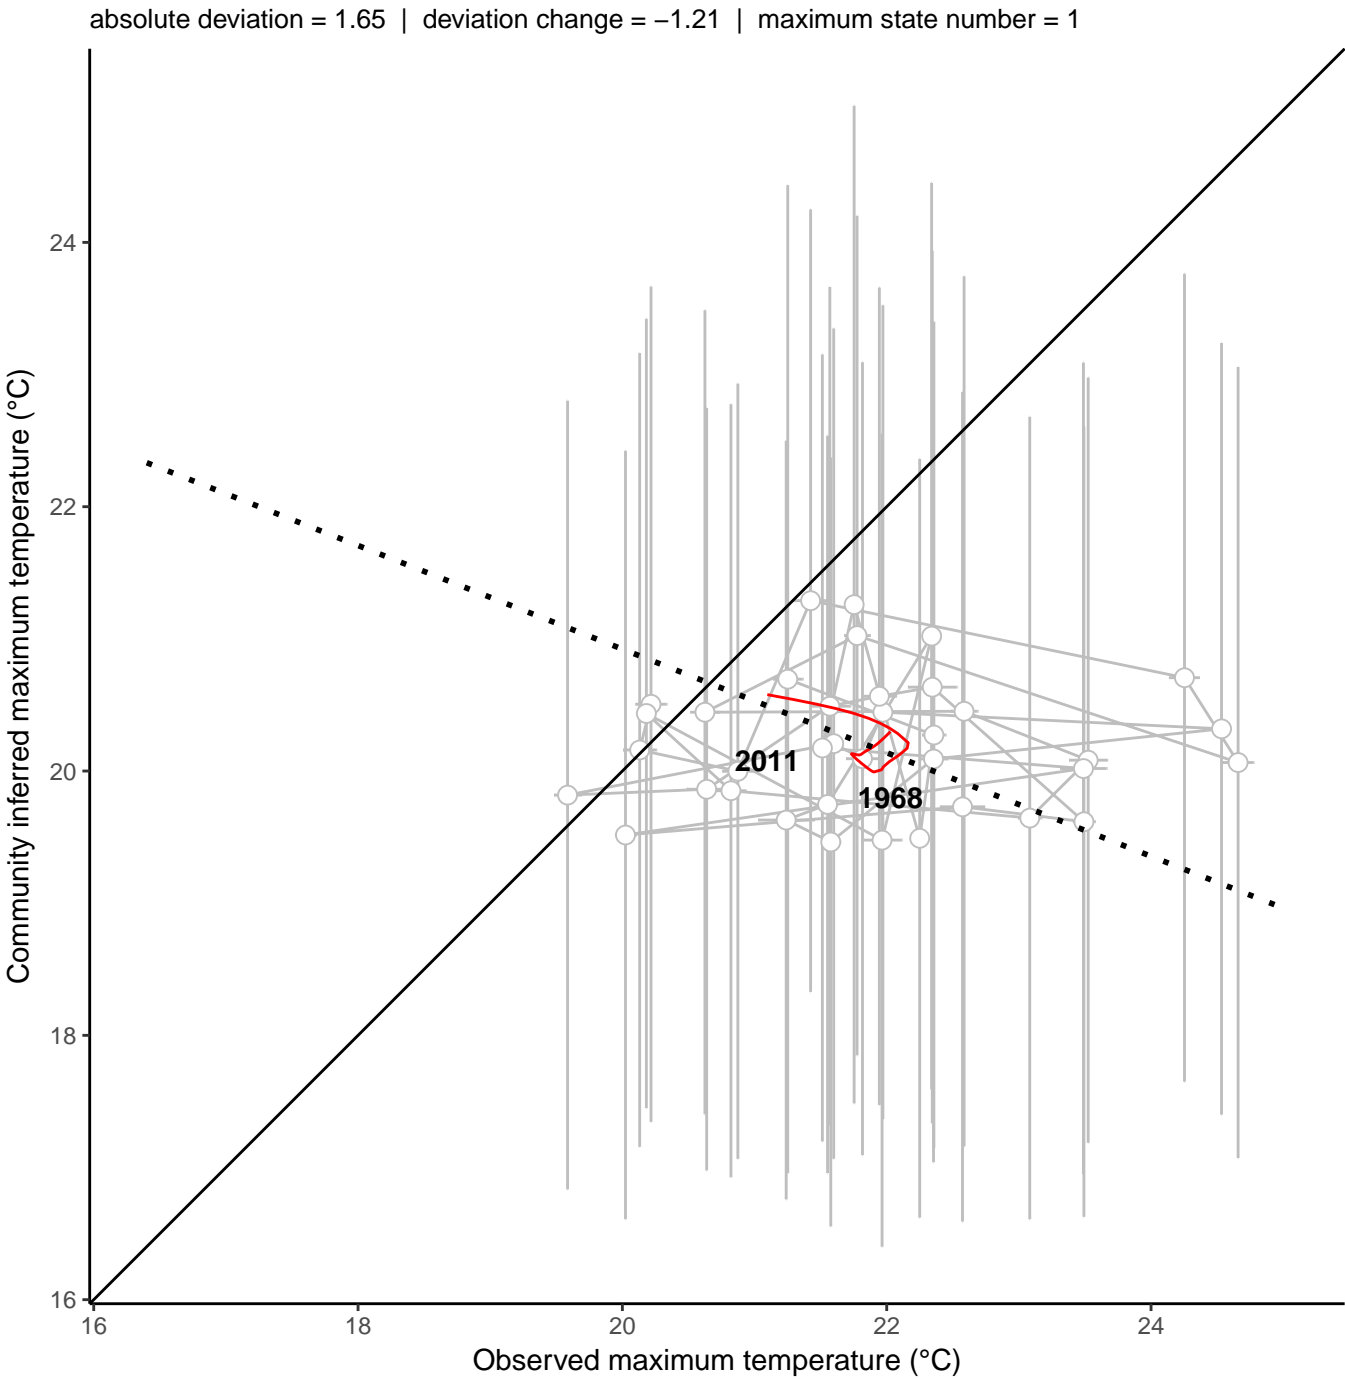

site : 840\_17\_27

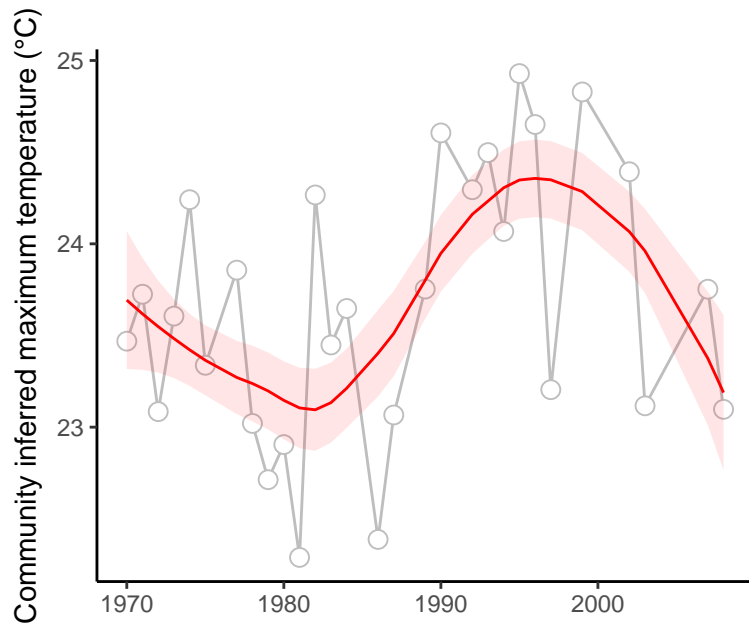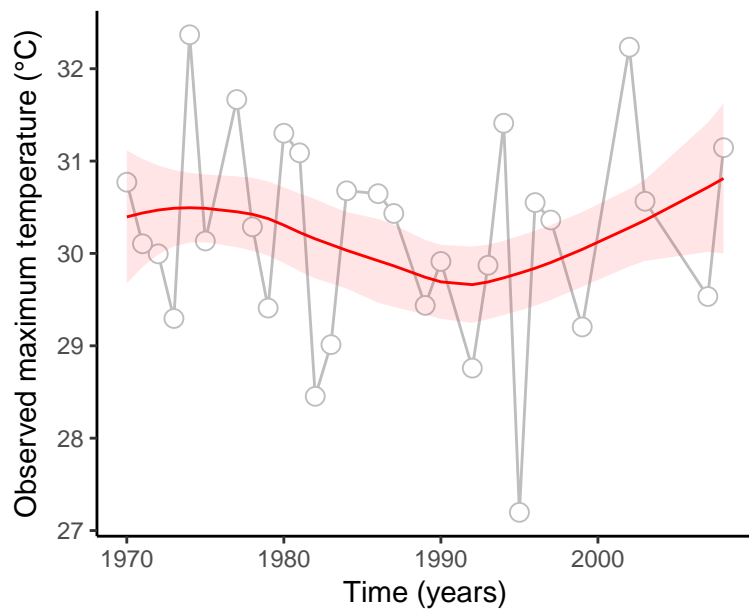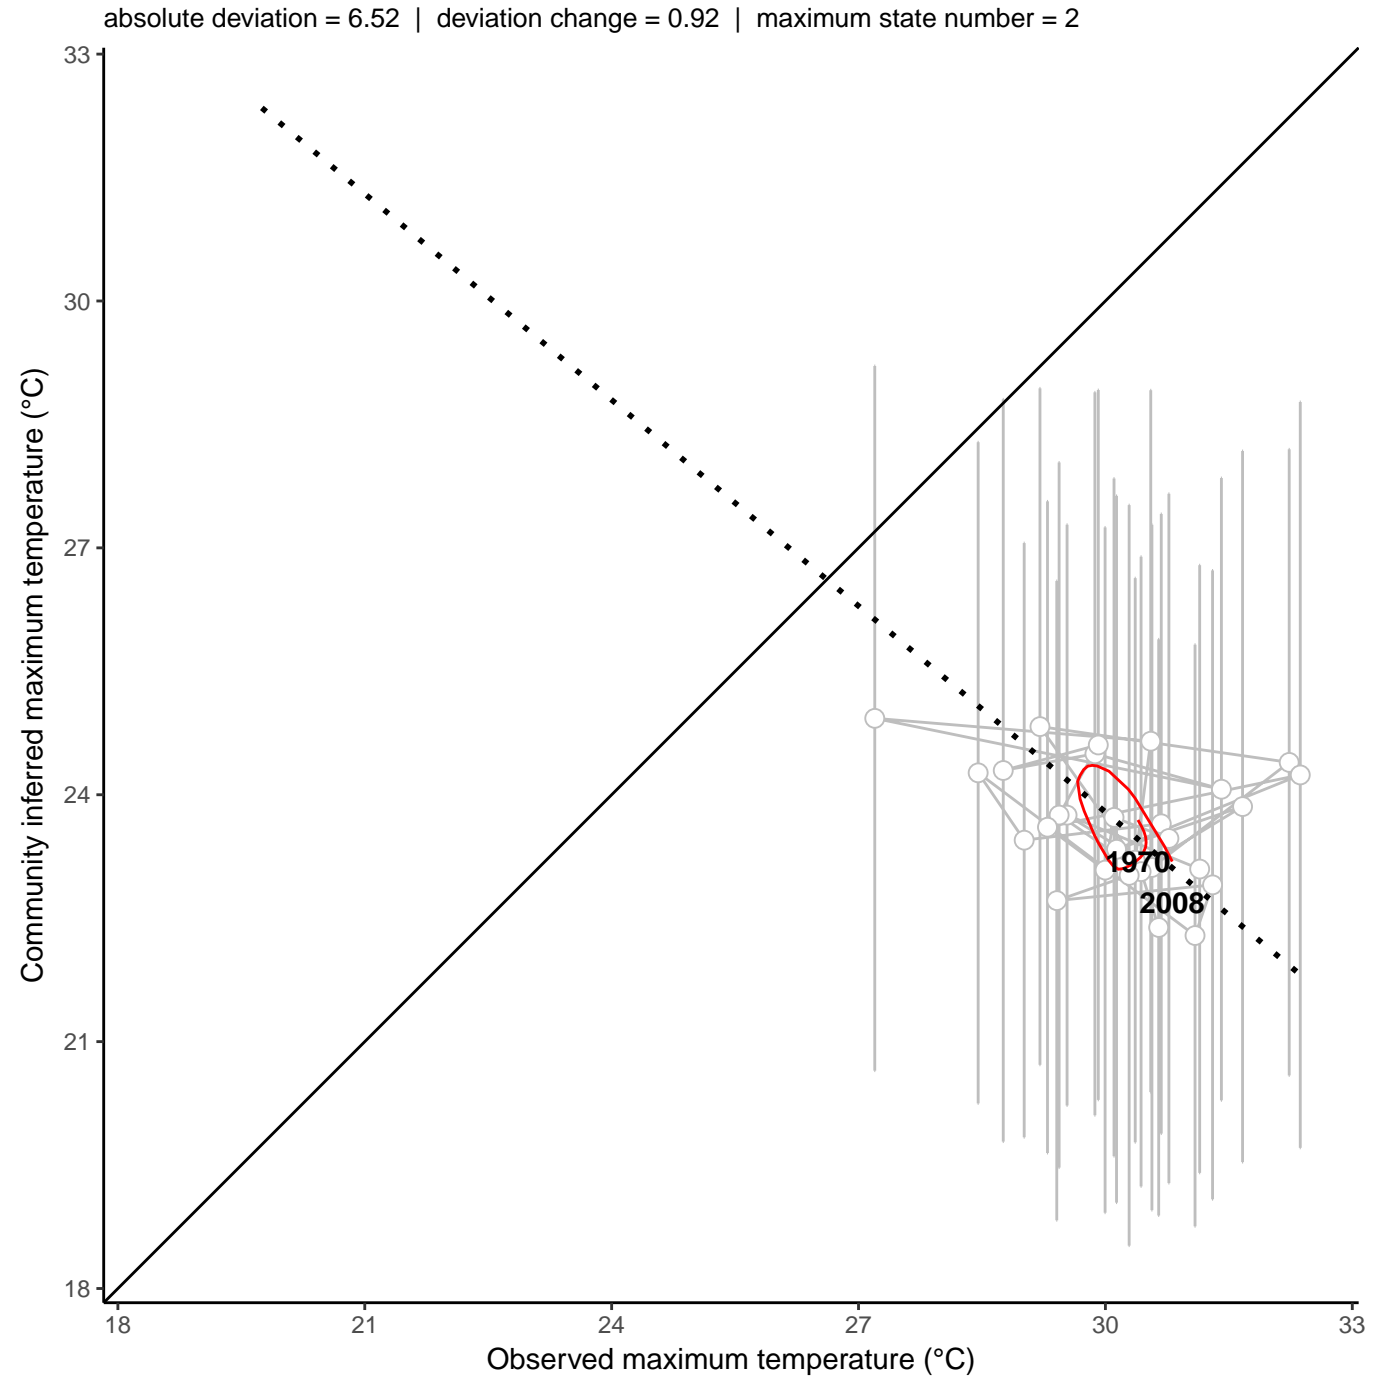

site : 840\_34\_46

absolute deviation = 3.68 | deviation change = 0.48 | maximum state number = 2

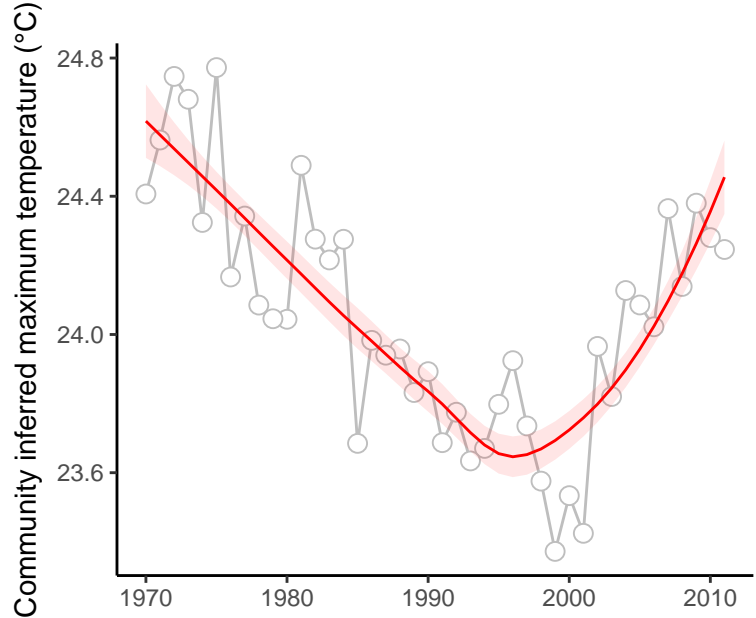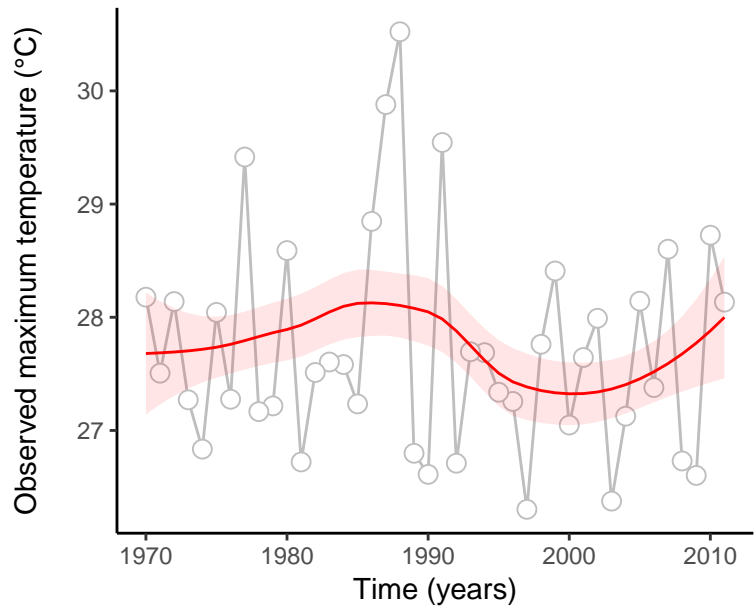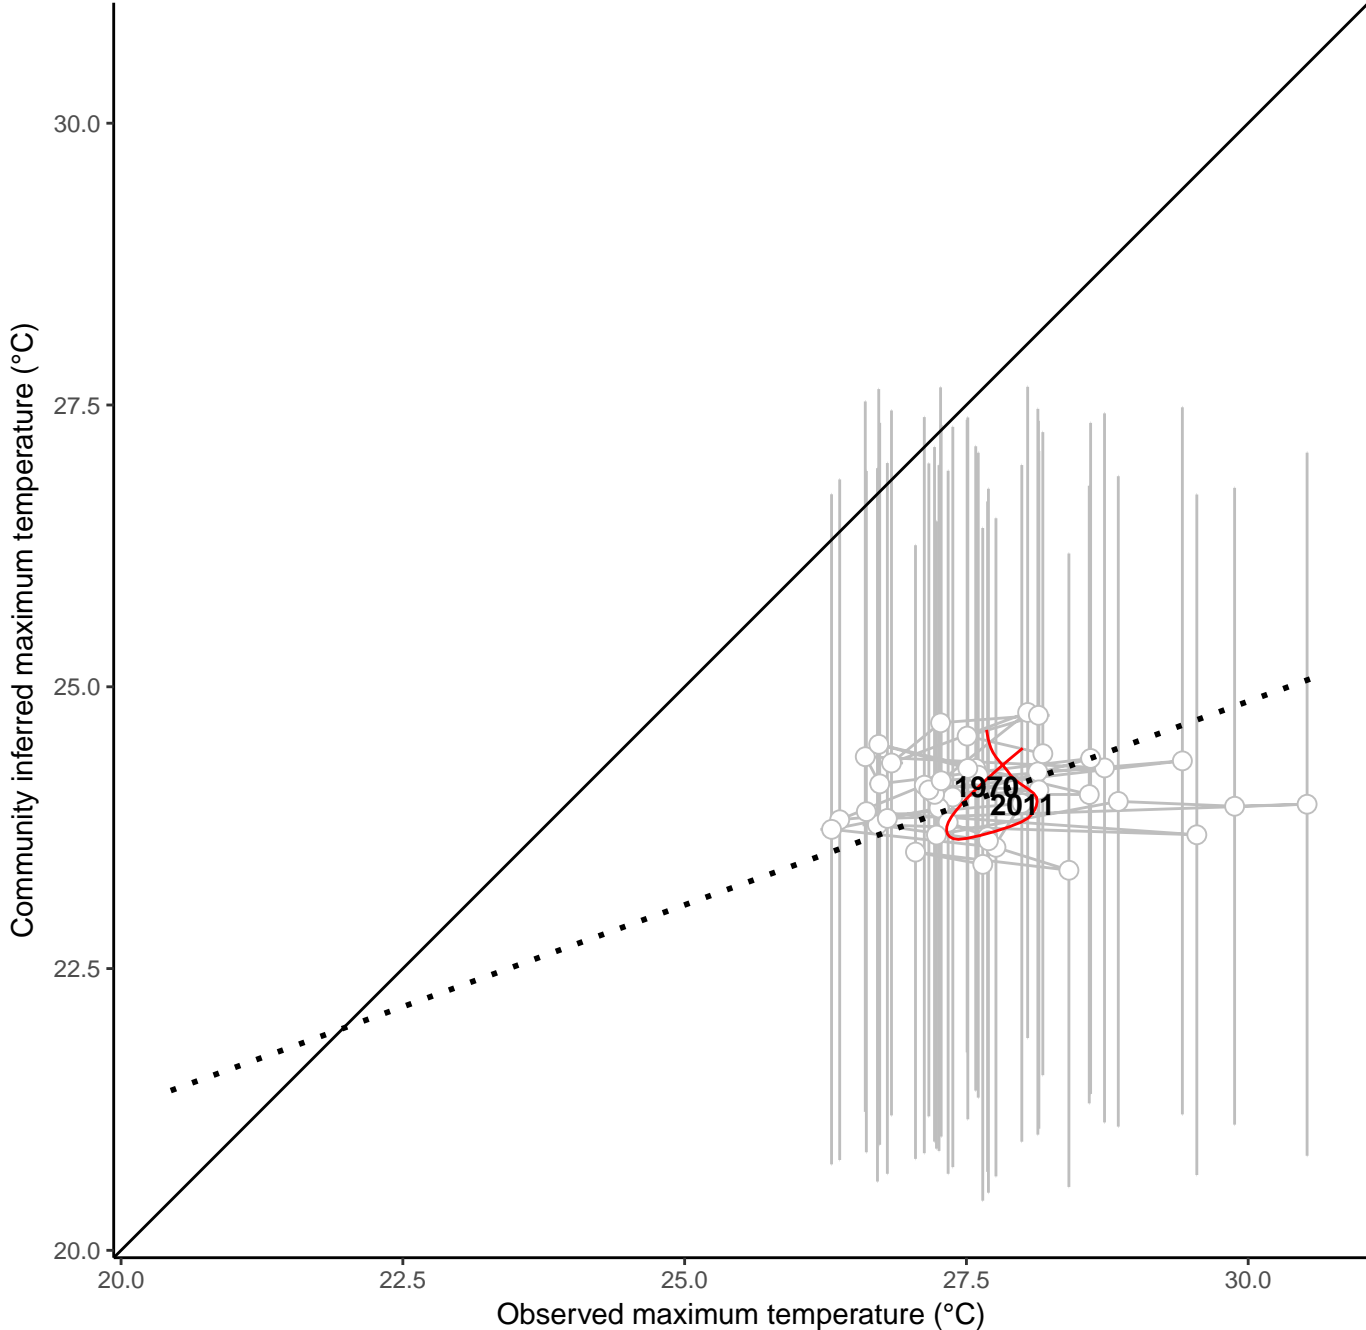



site : 840\_34\_64

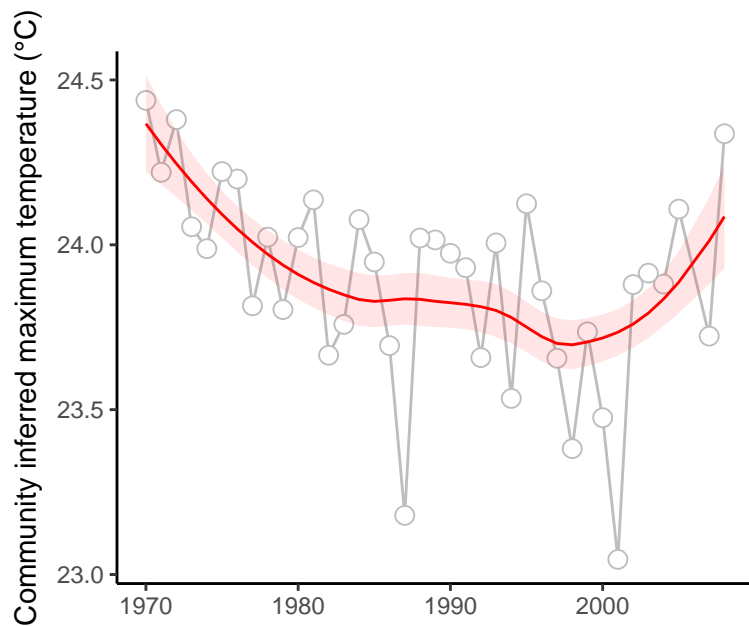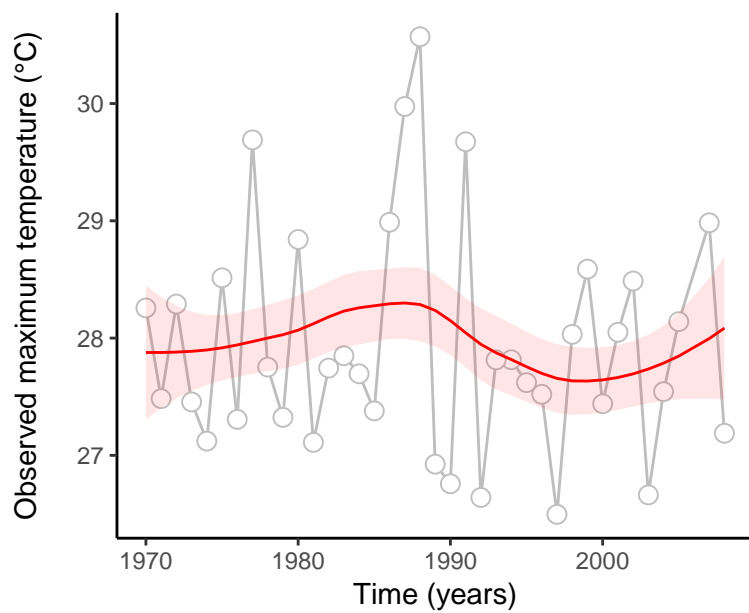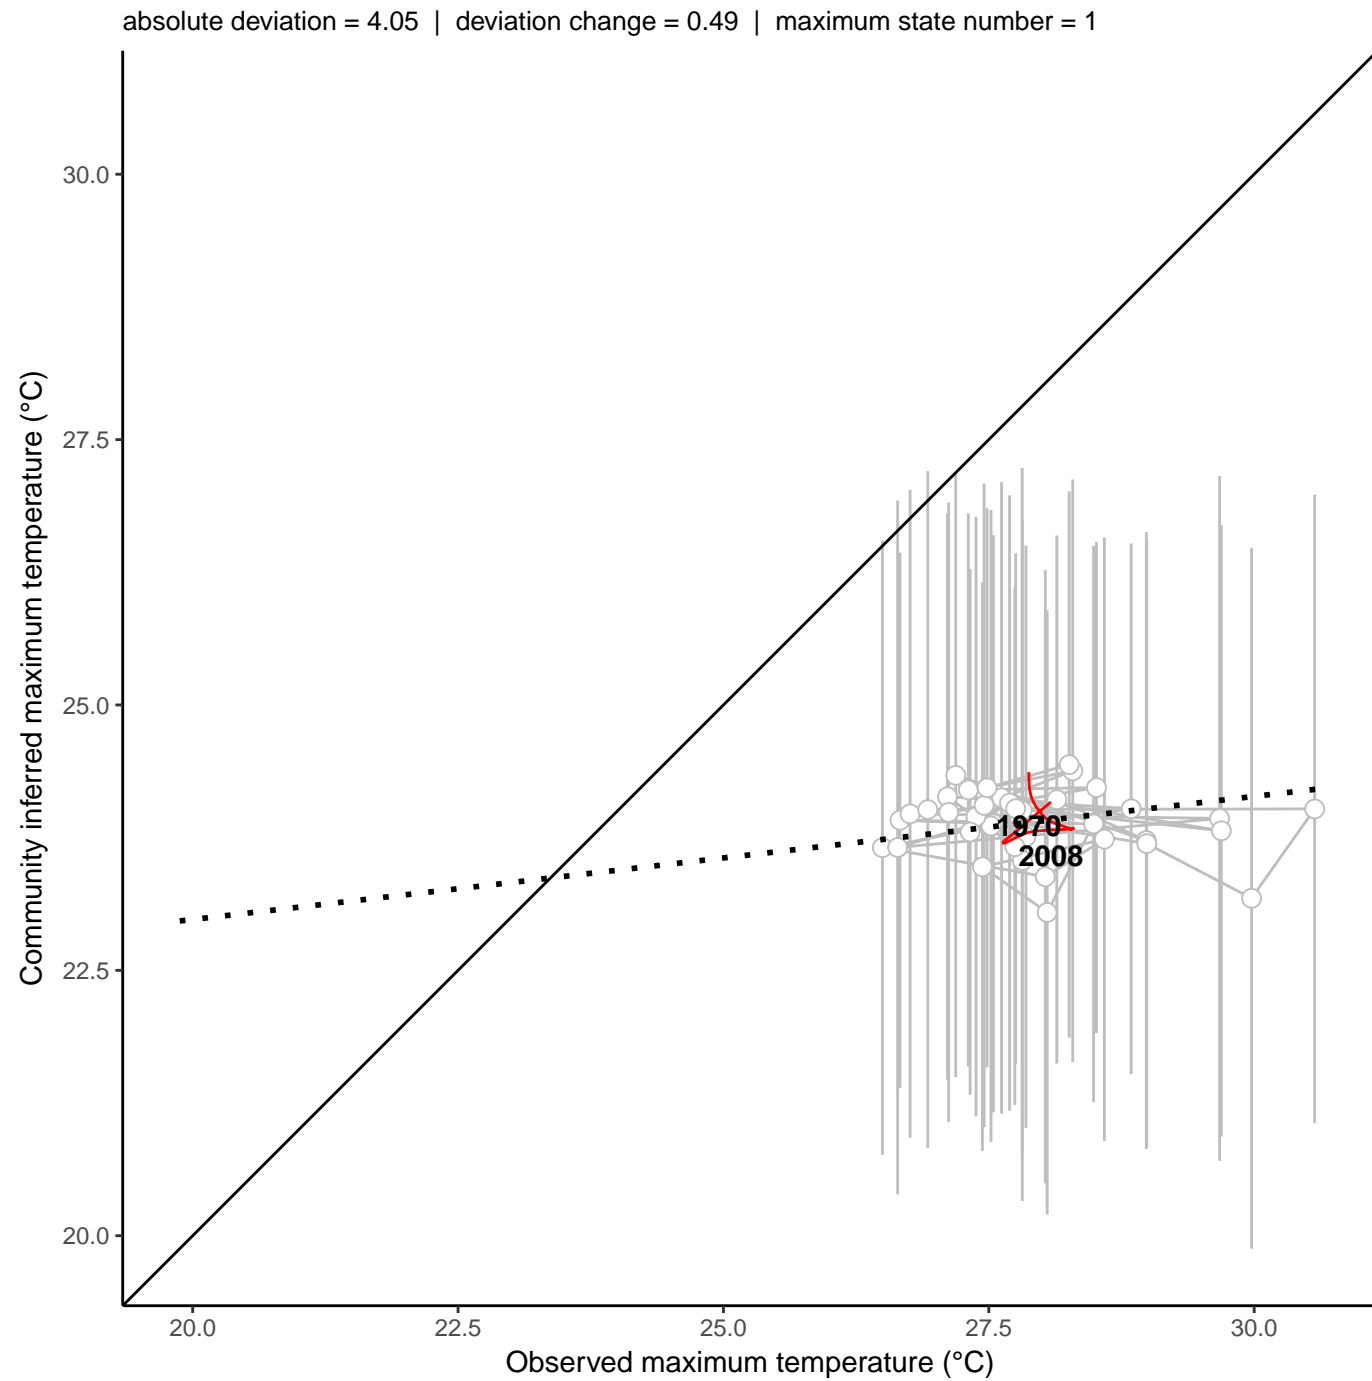

site : 840\_67\_33

absolute deviation = 6.26 | deviation change = 0.03 | maximum state number = 1

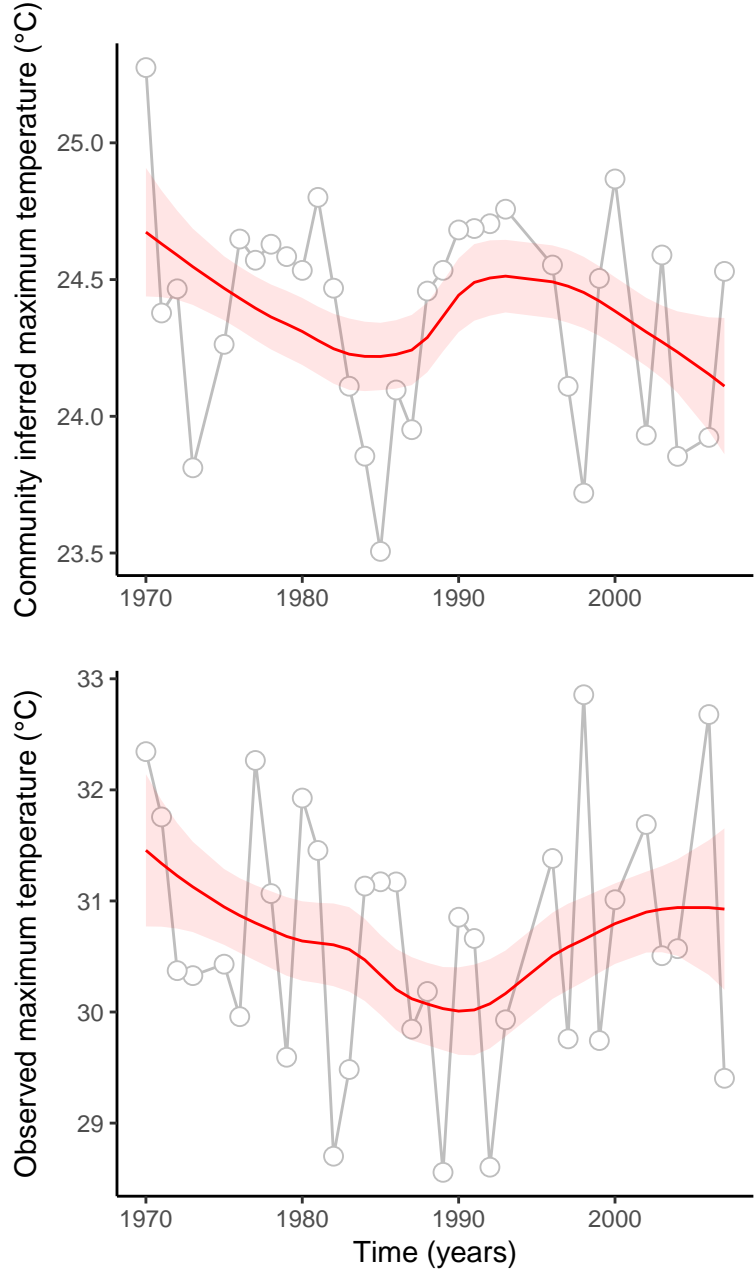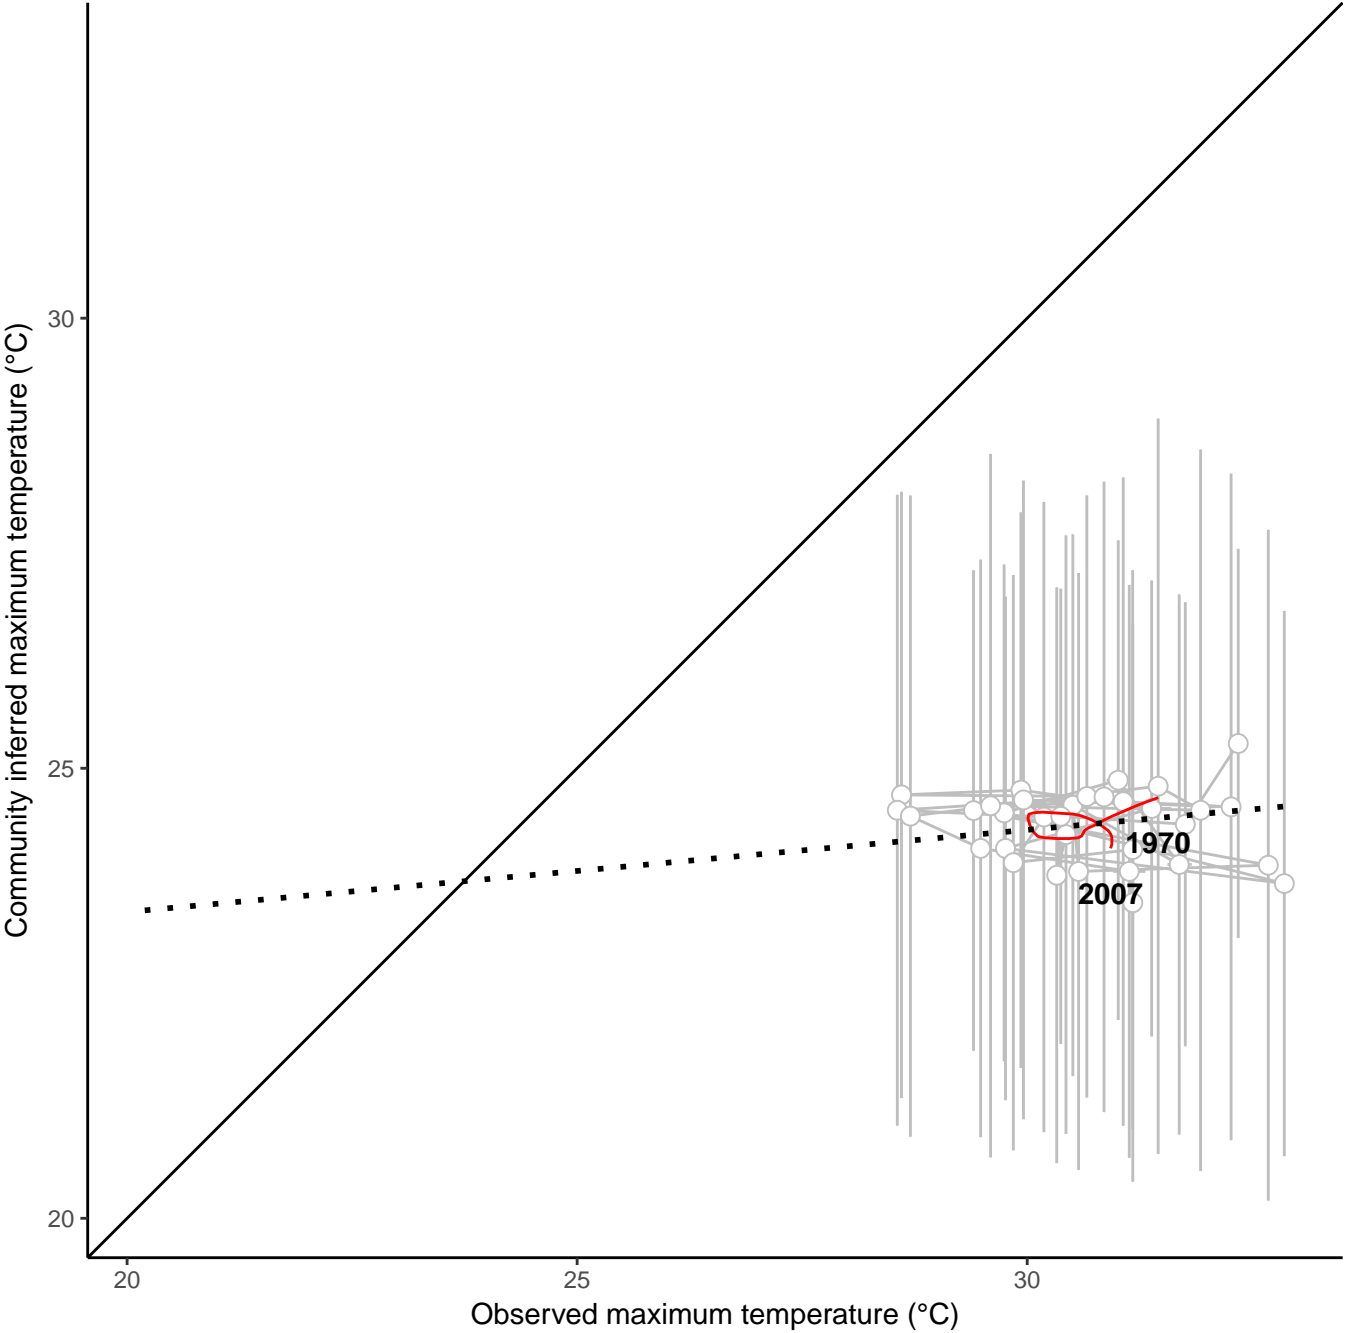

site : 840\_7\_23

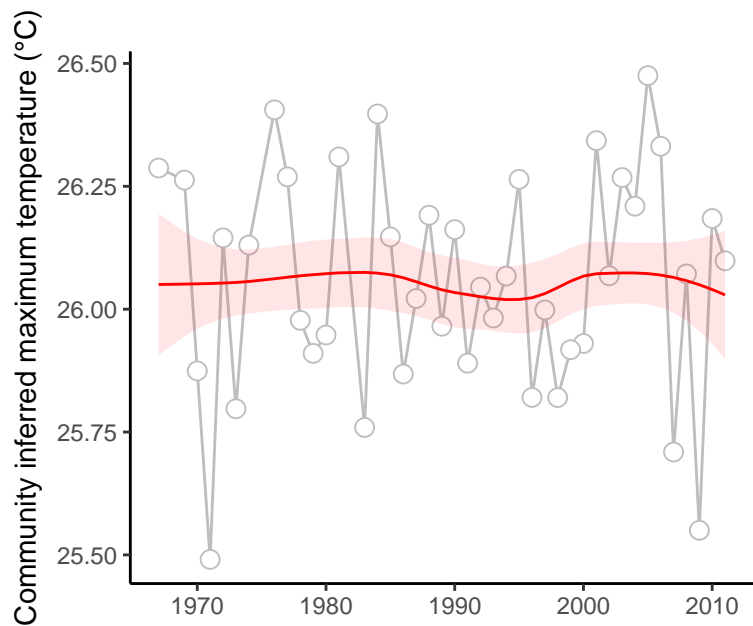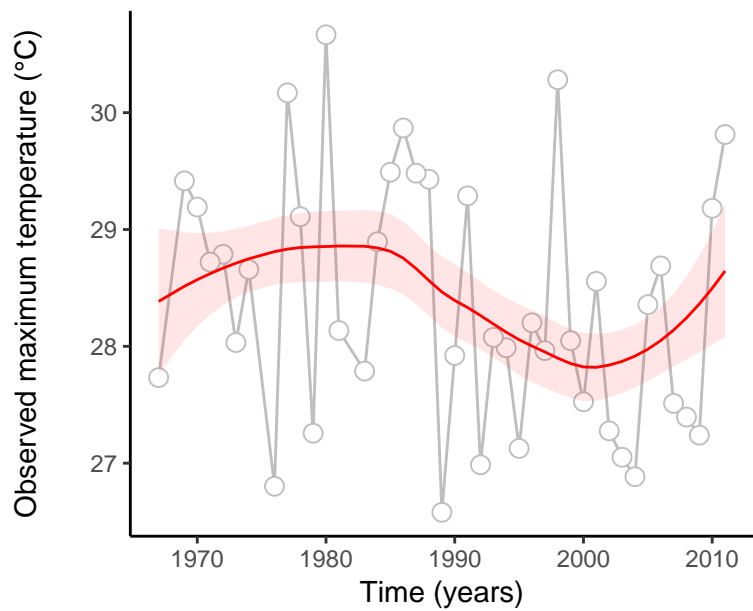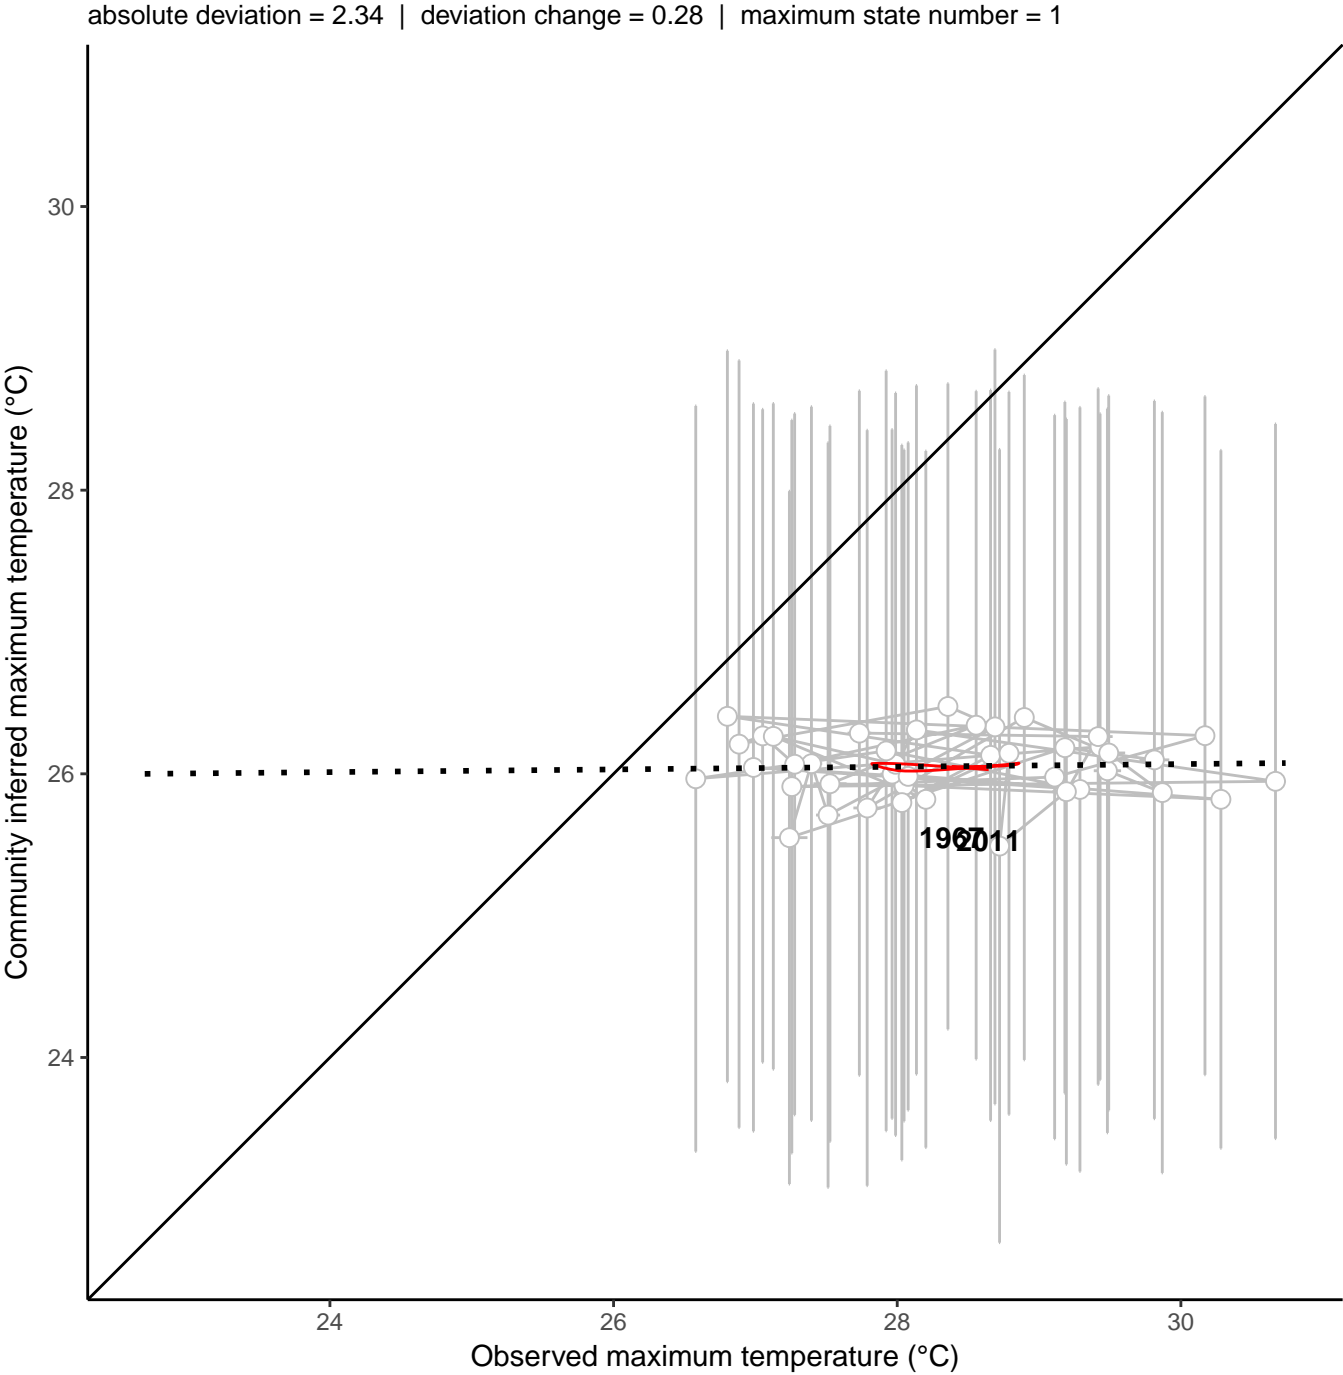

site : 840\_80\_13

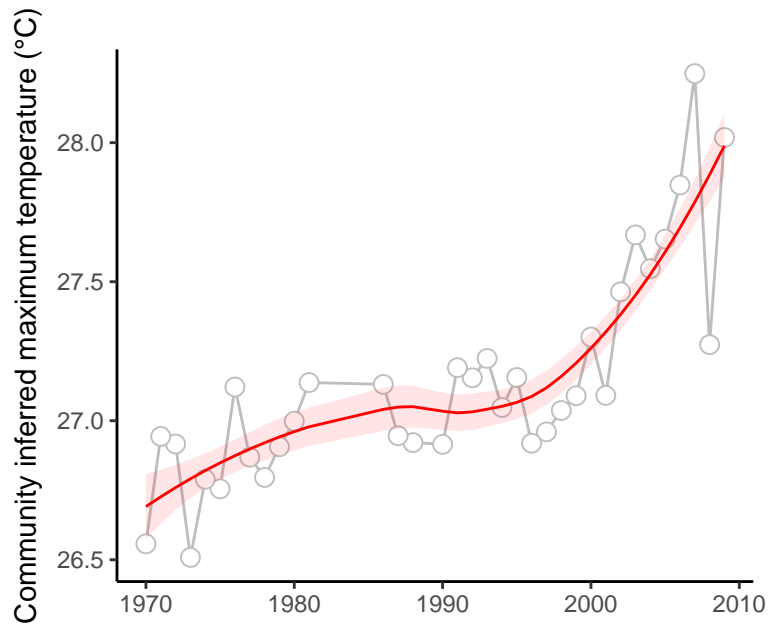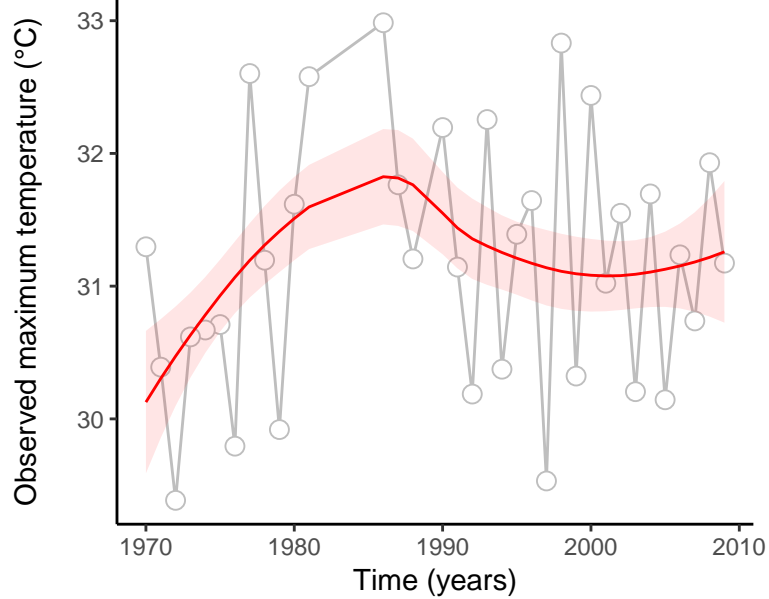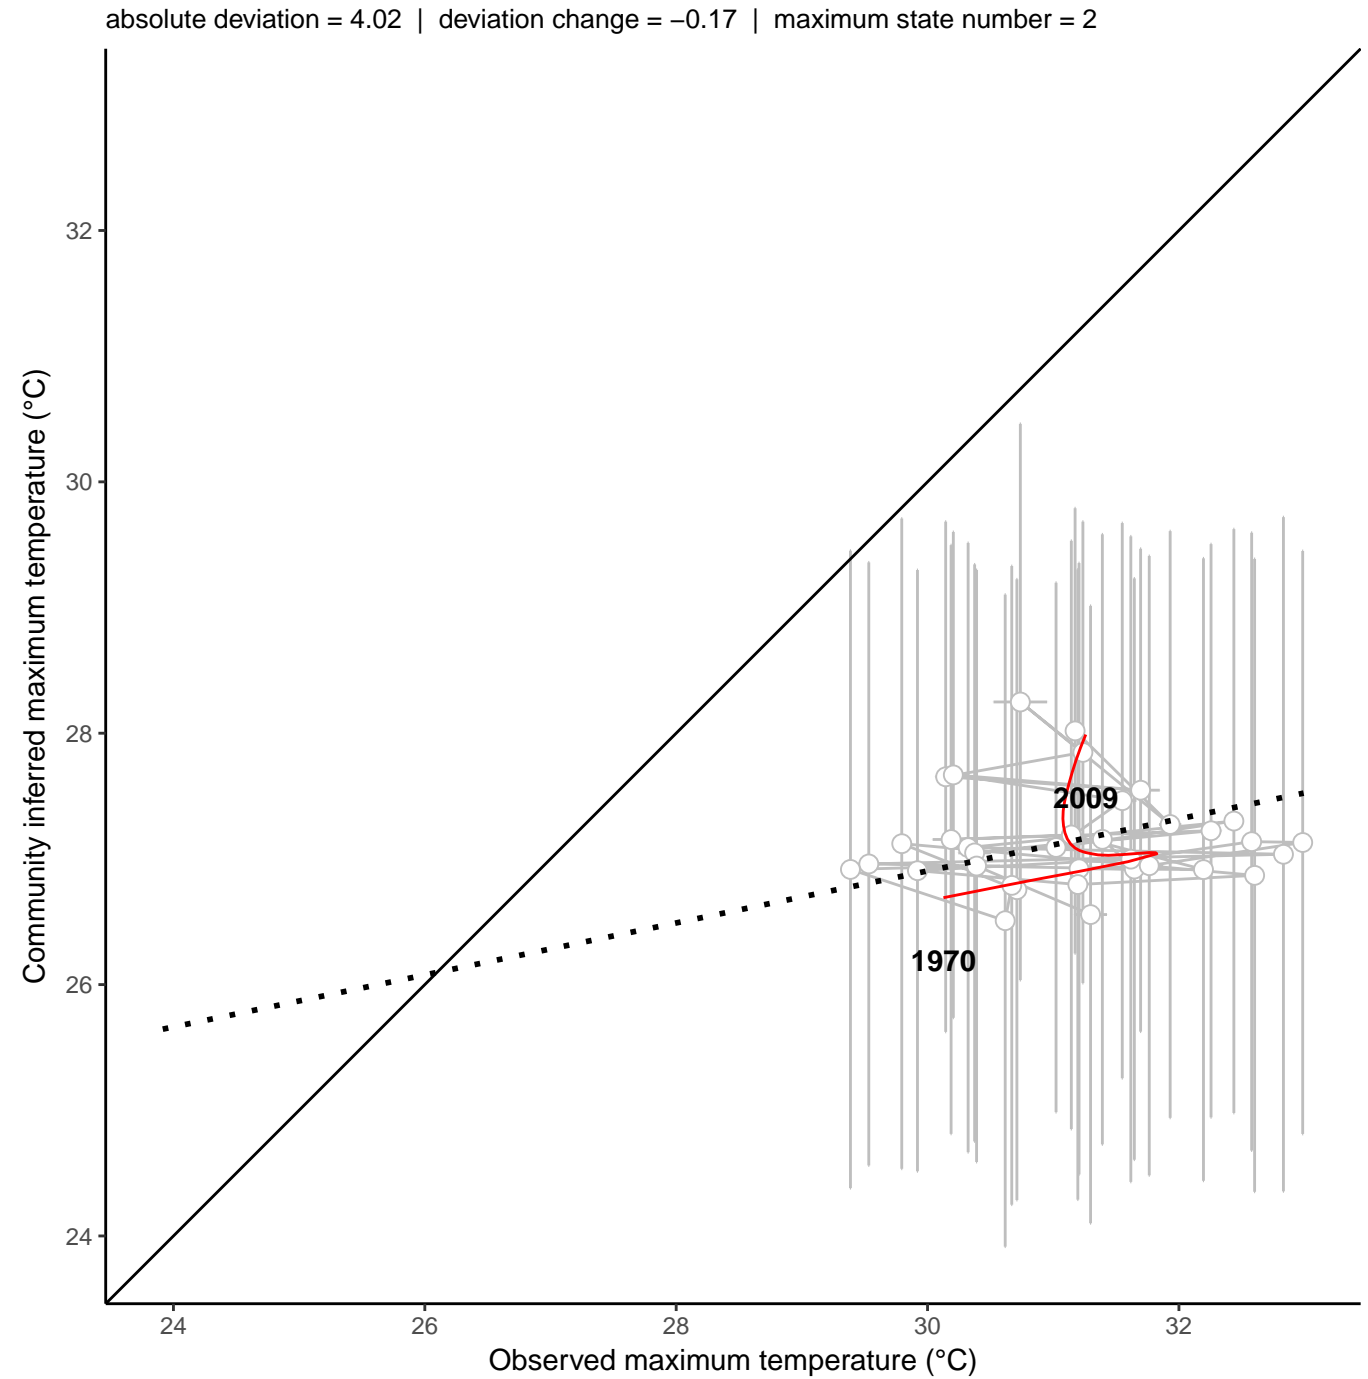

site : 840\_81\_3

absolute deviation = 2.2 | deviation change = -1.1 | maximum state number = 1

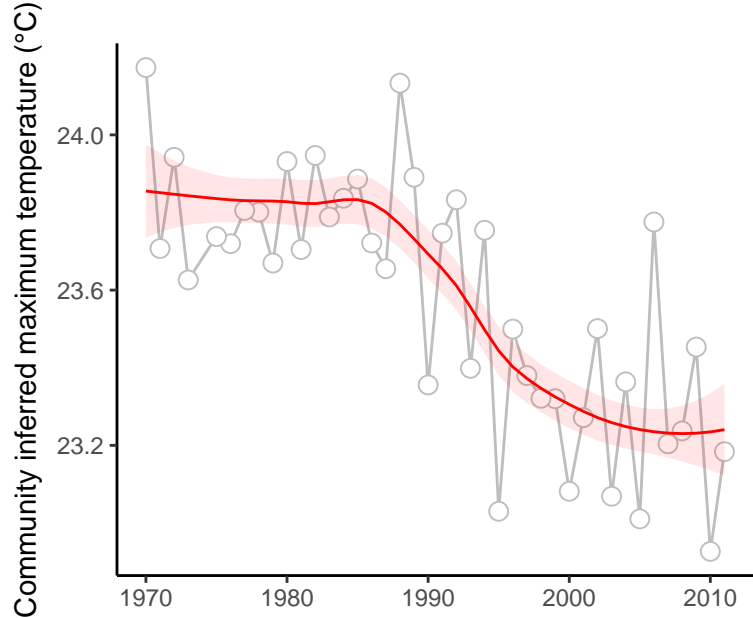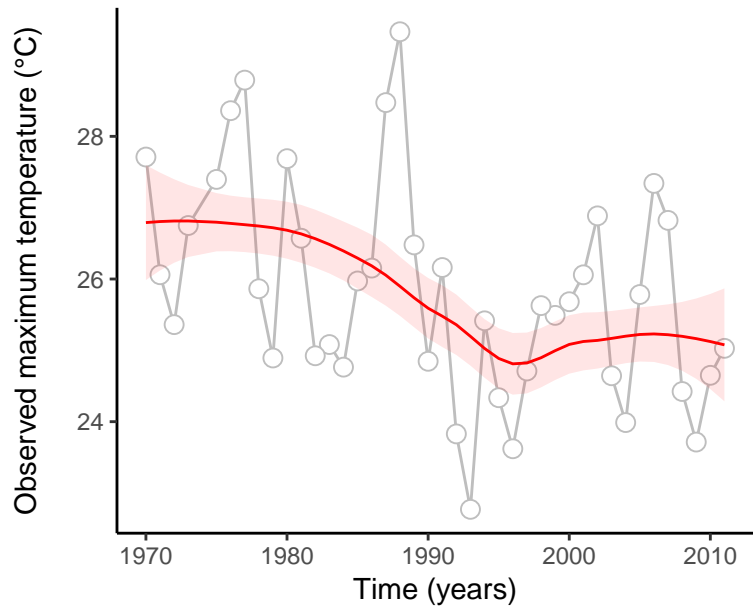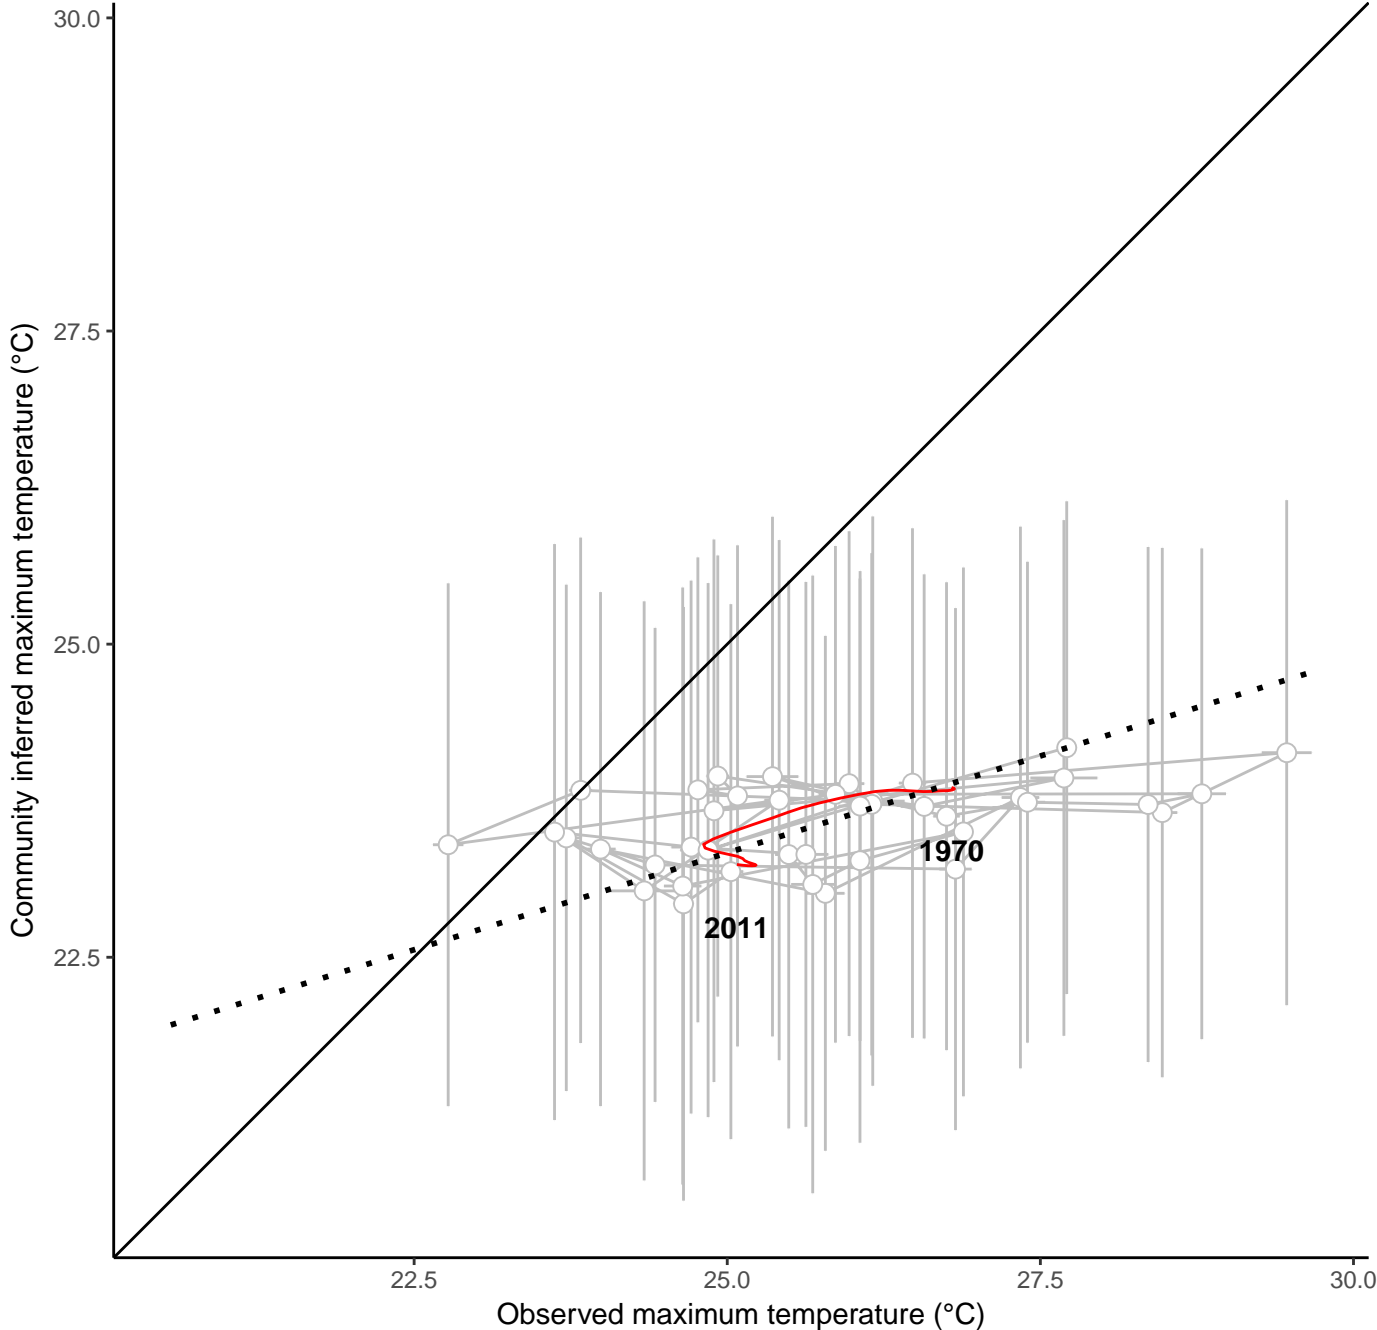

site : 840\_83\_46

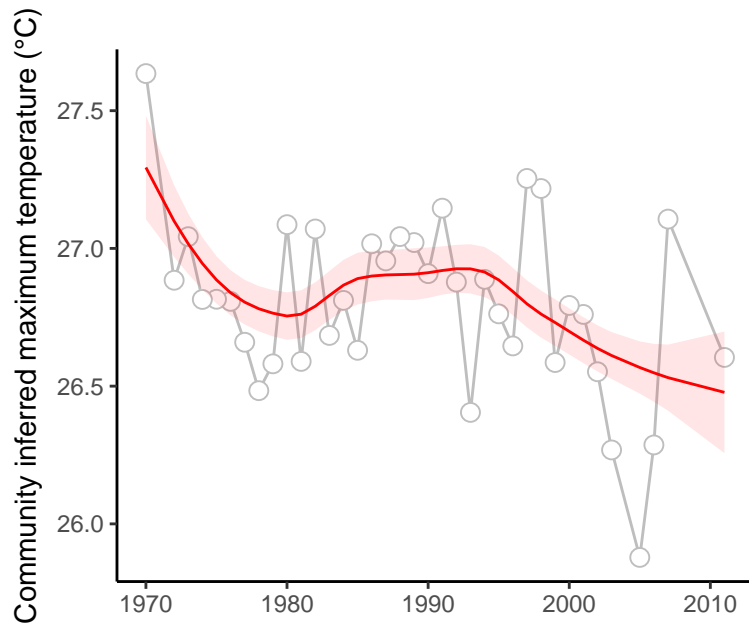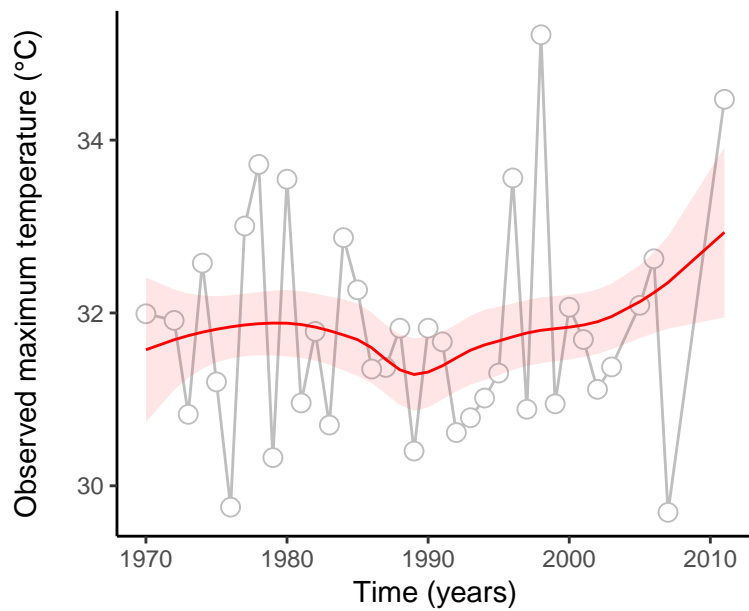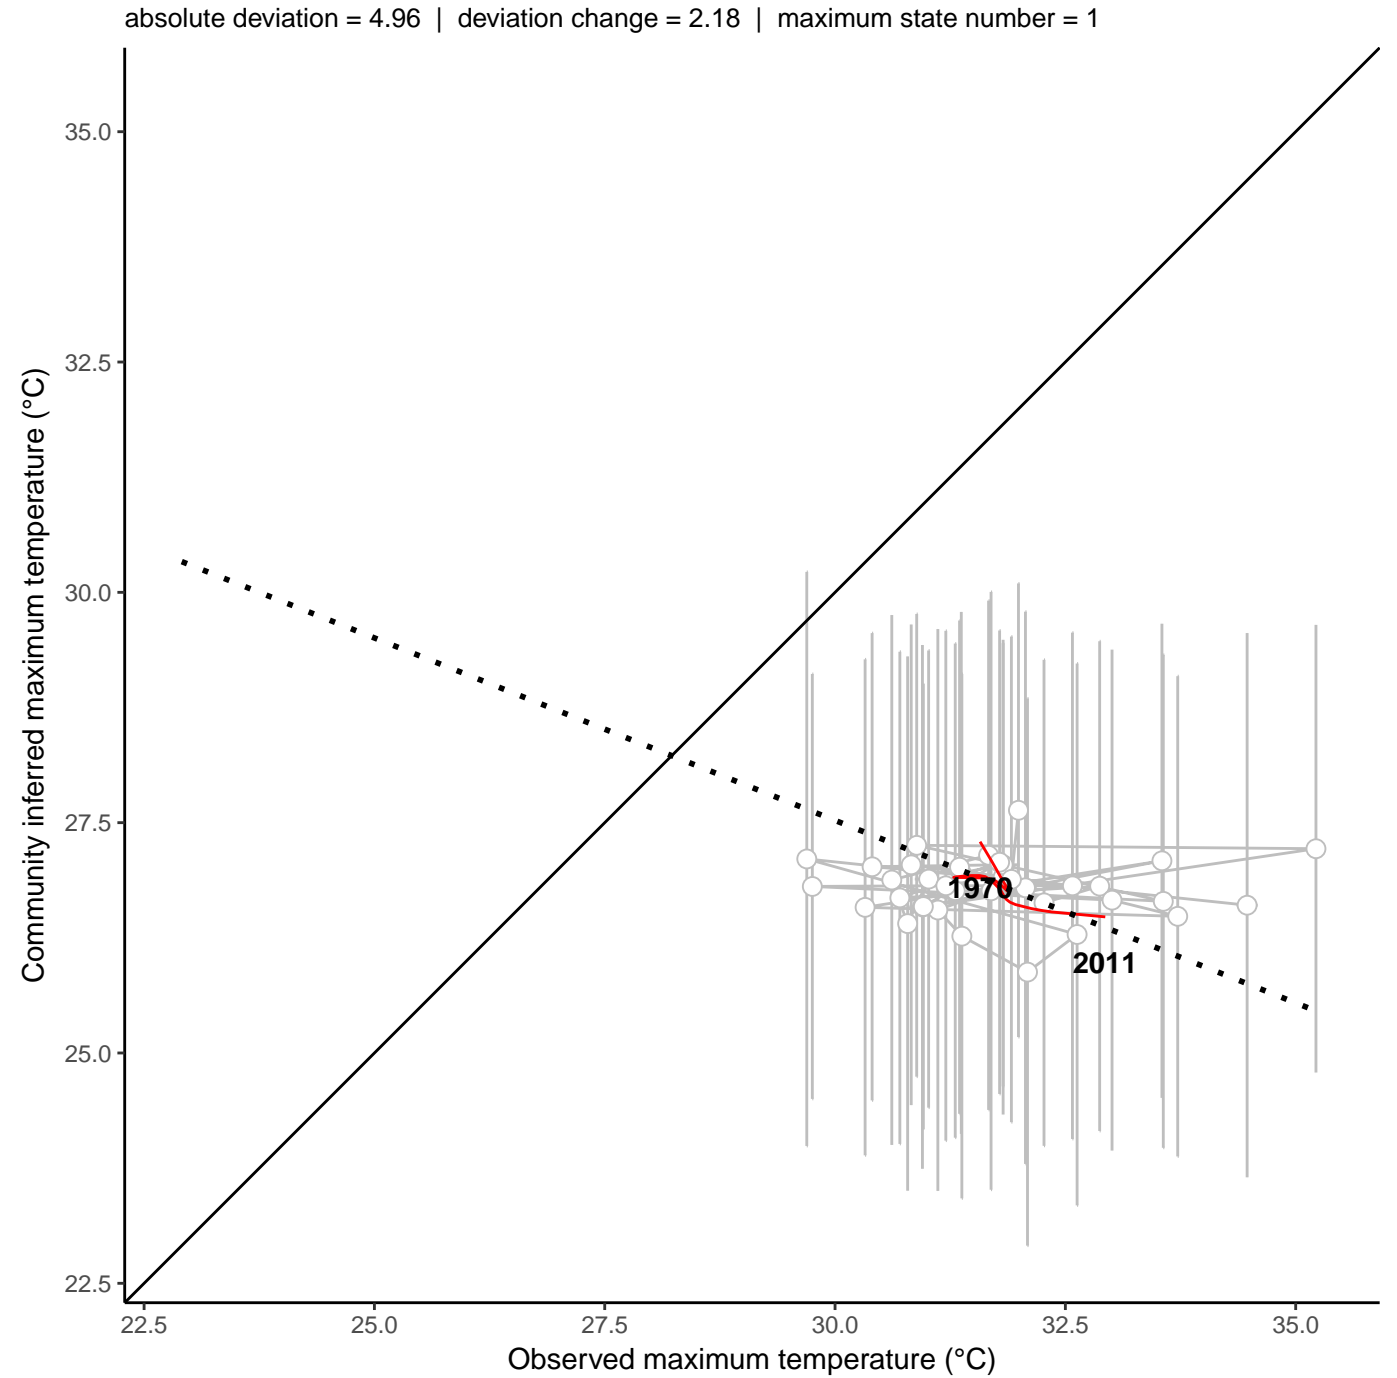

site : 840\_92\_3

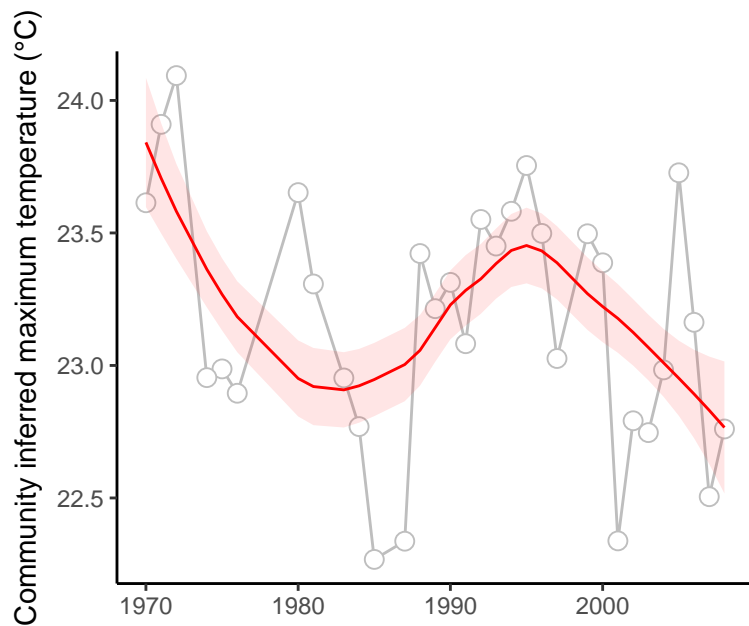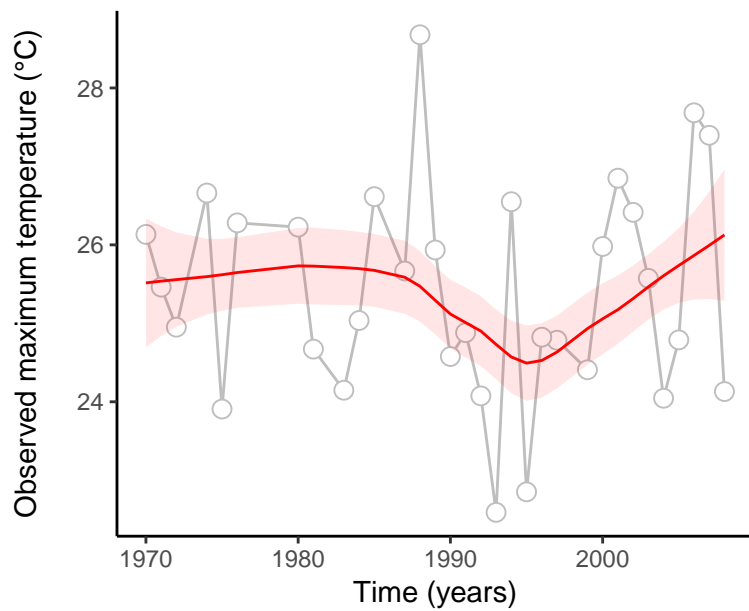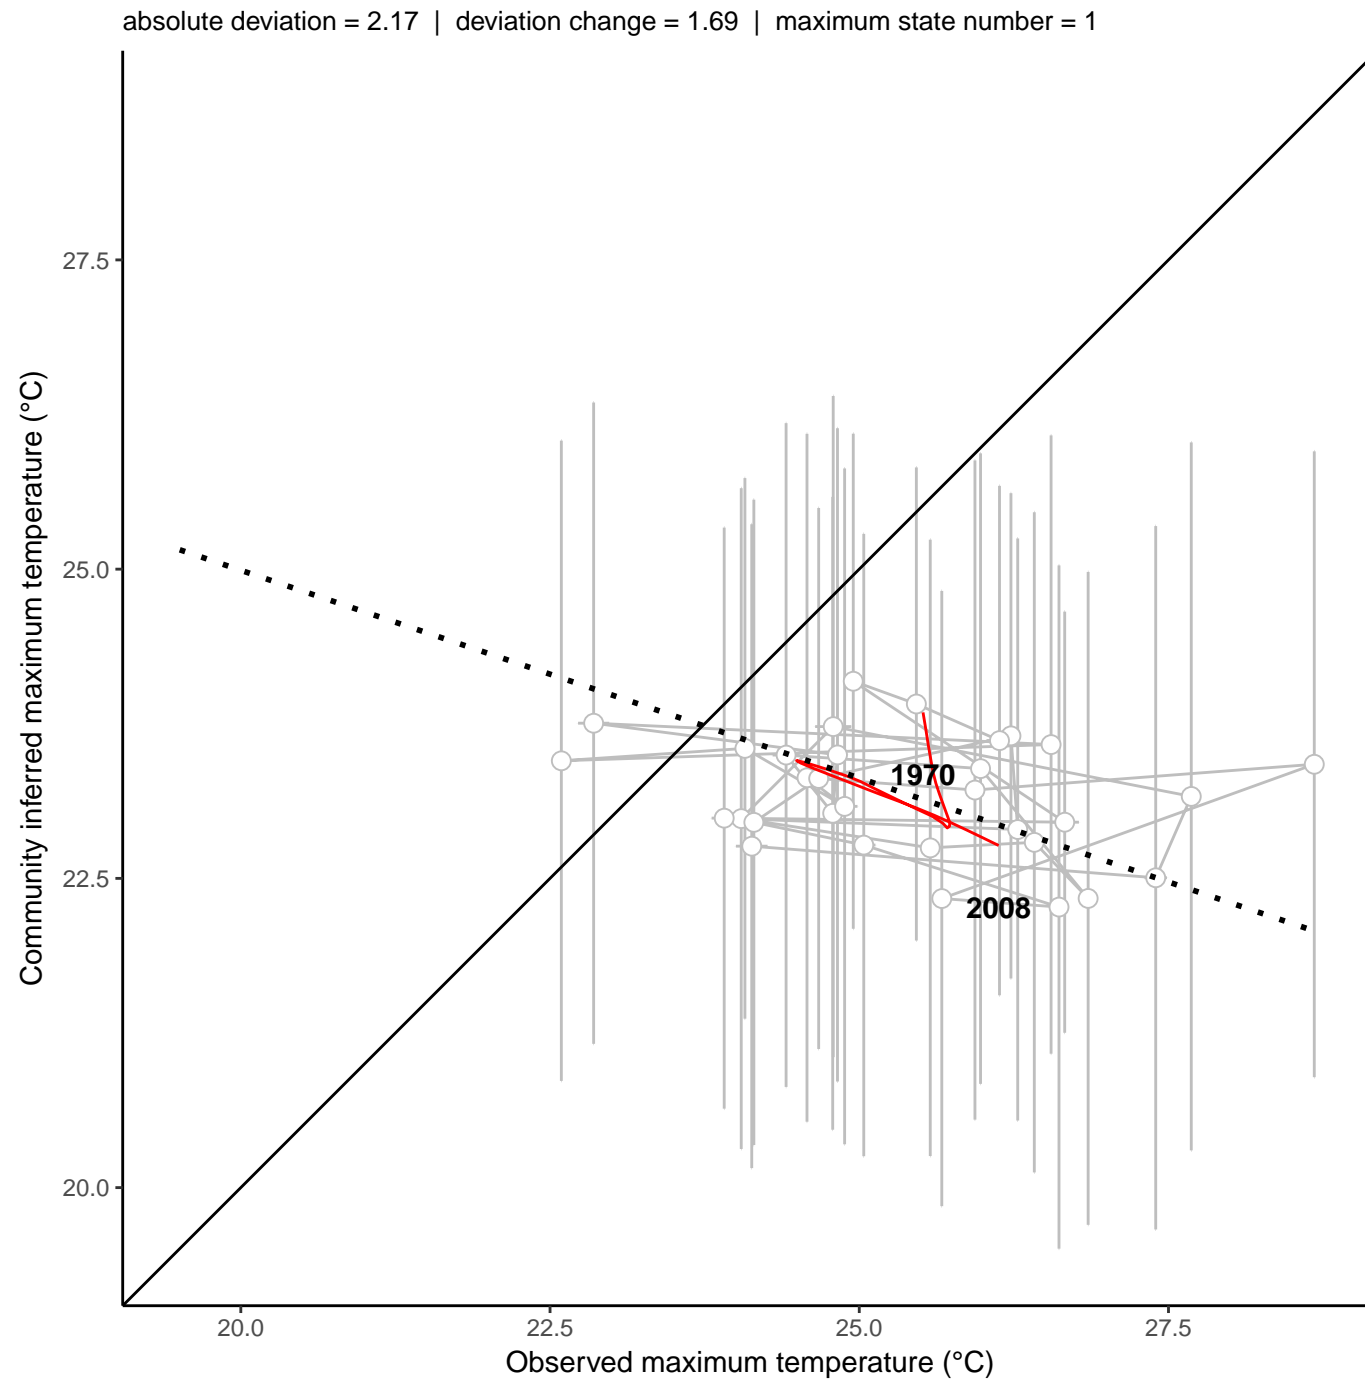

site : 840\_14\_148

absolute deviation = 7.47 | deviation change = -0.08 | maximum state number = 1

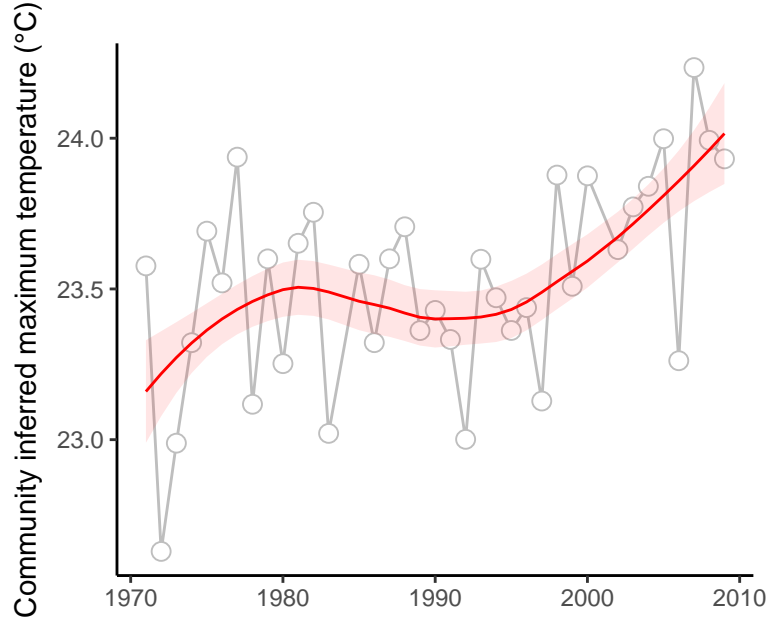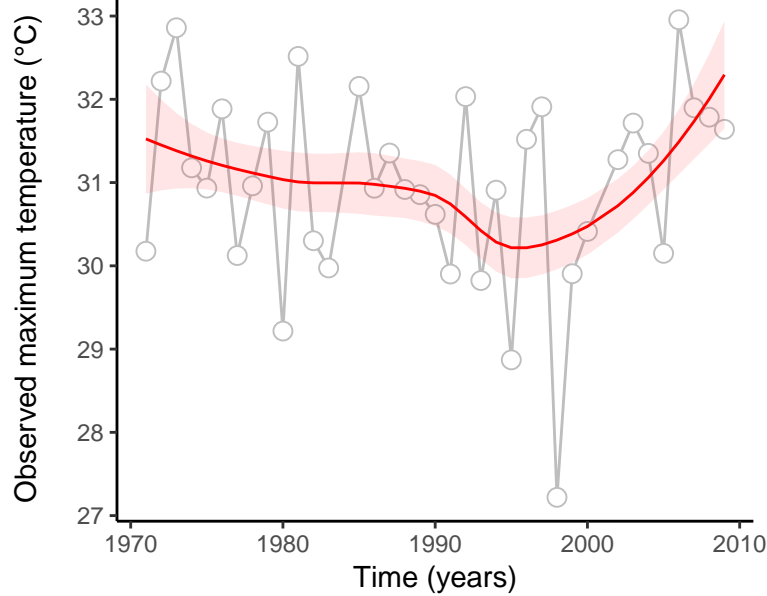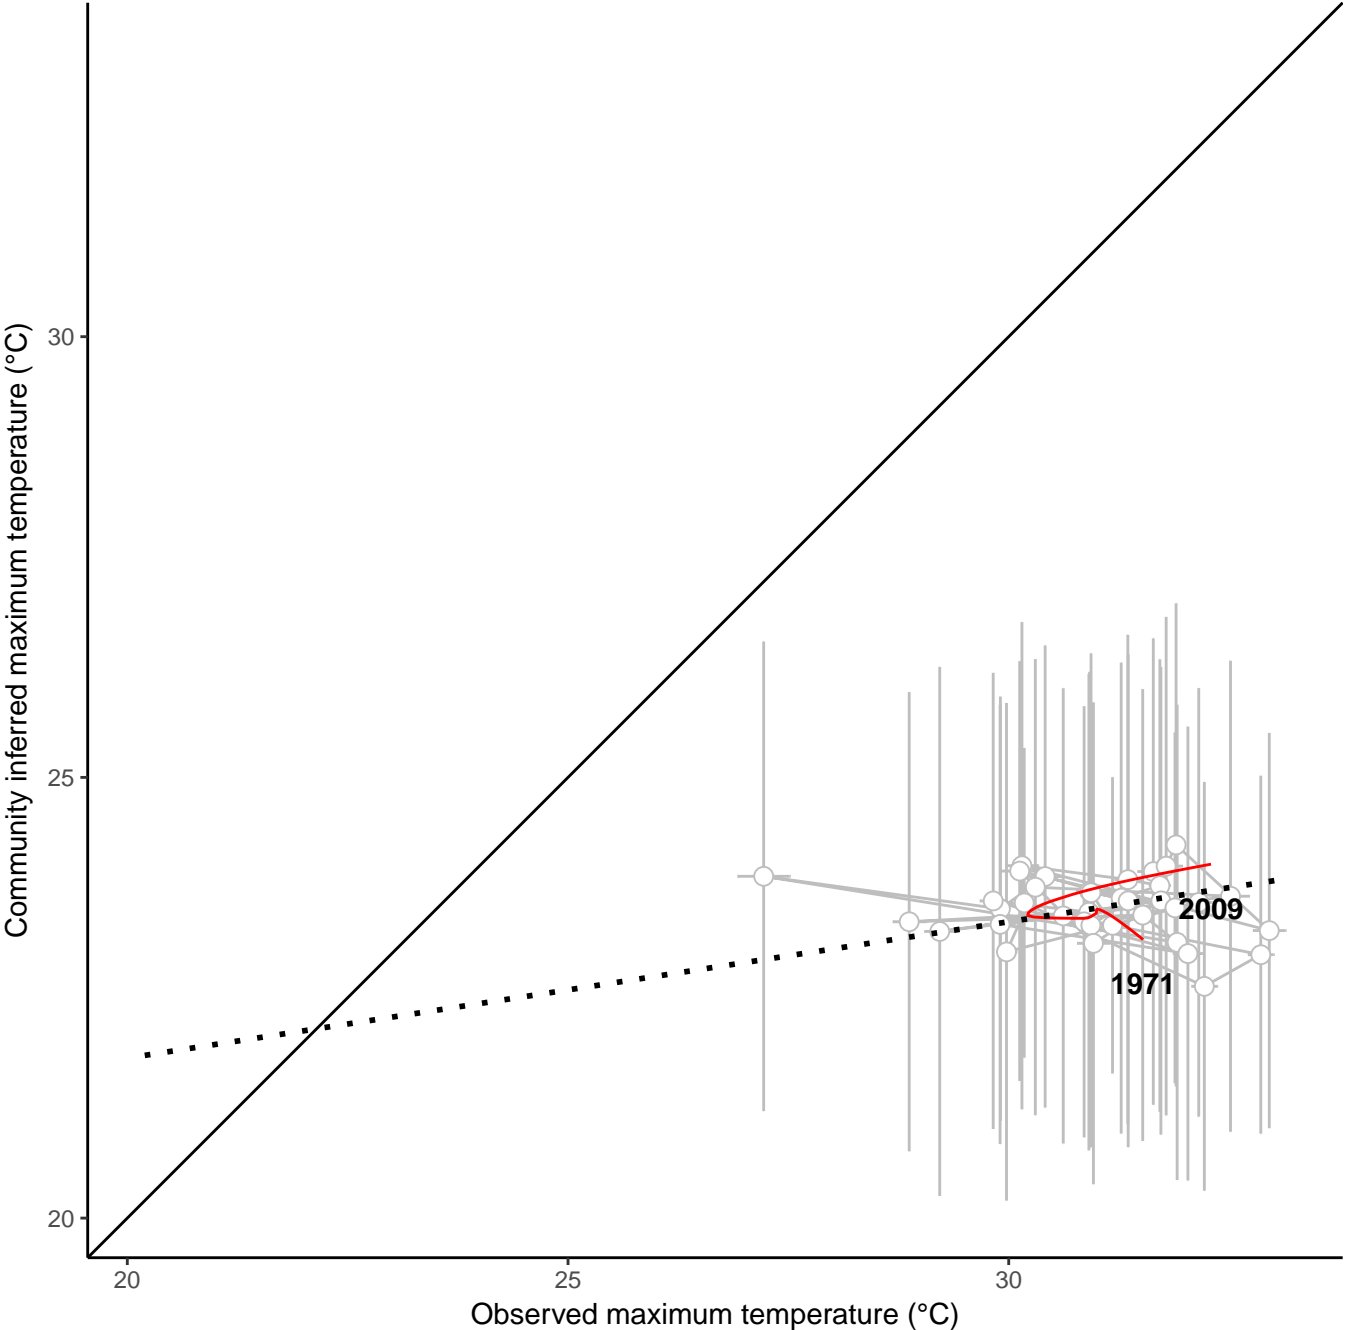



site : 840\_14\_150

absolute deviation = 13.27 | deviation change = -0.22 | maximum state number = 2

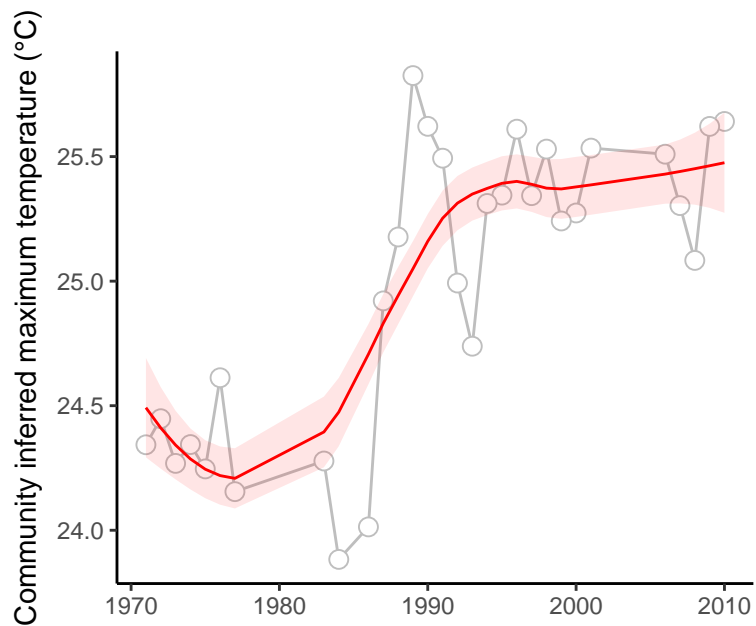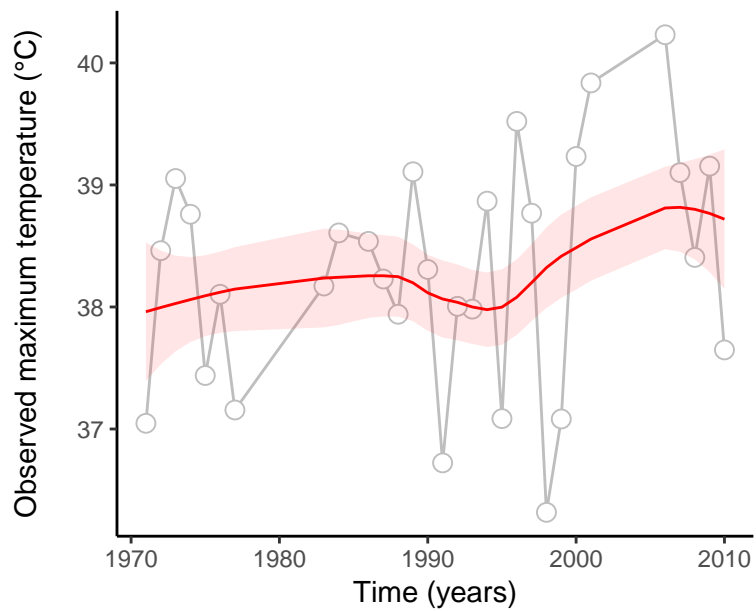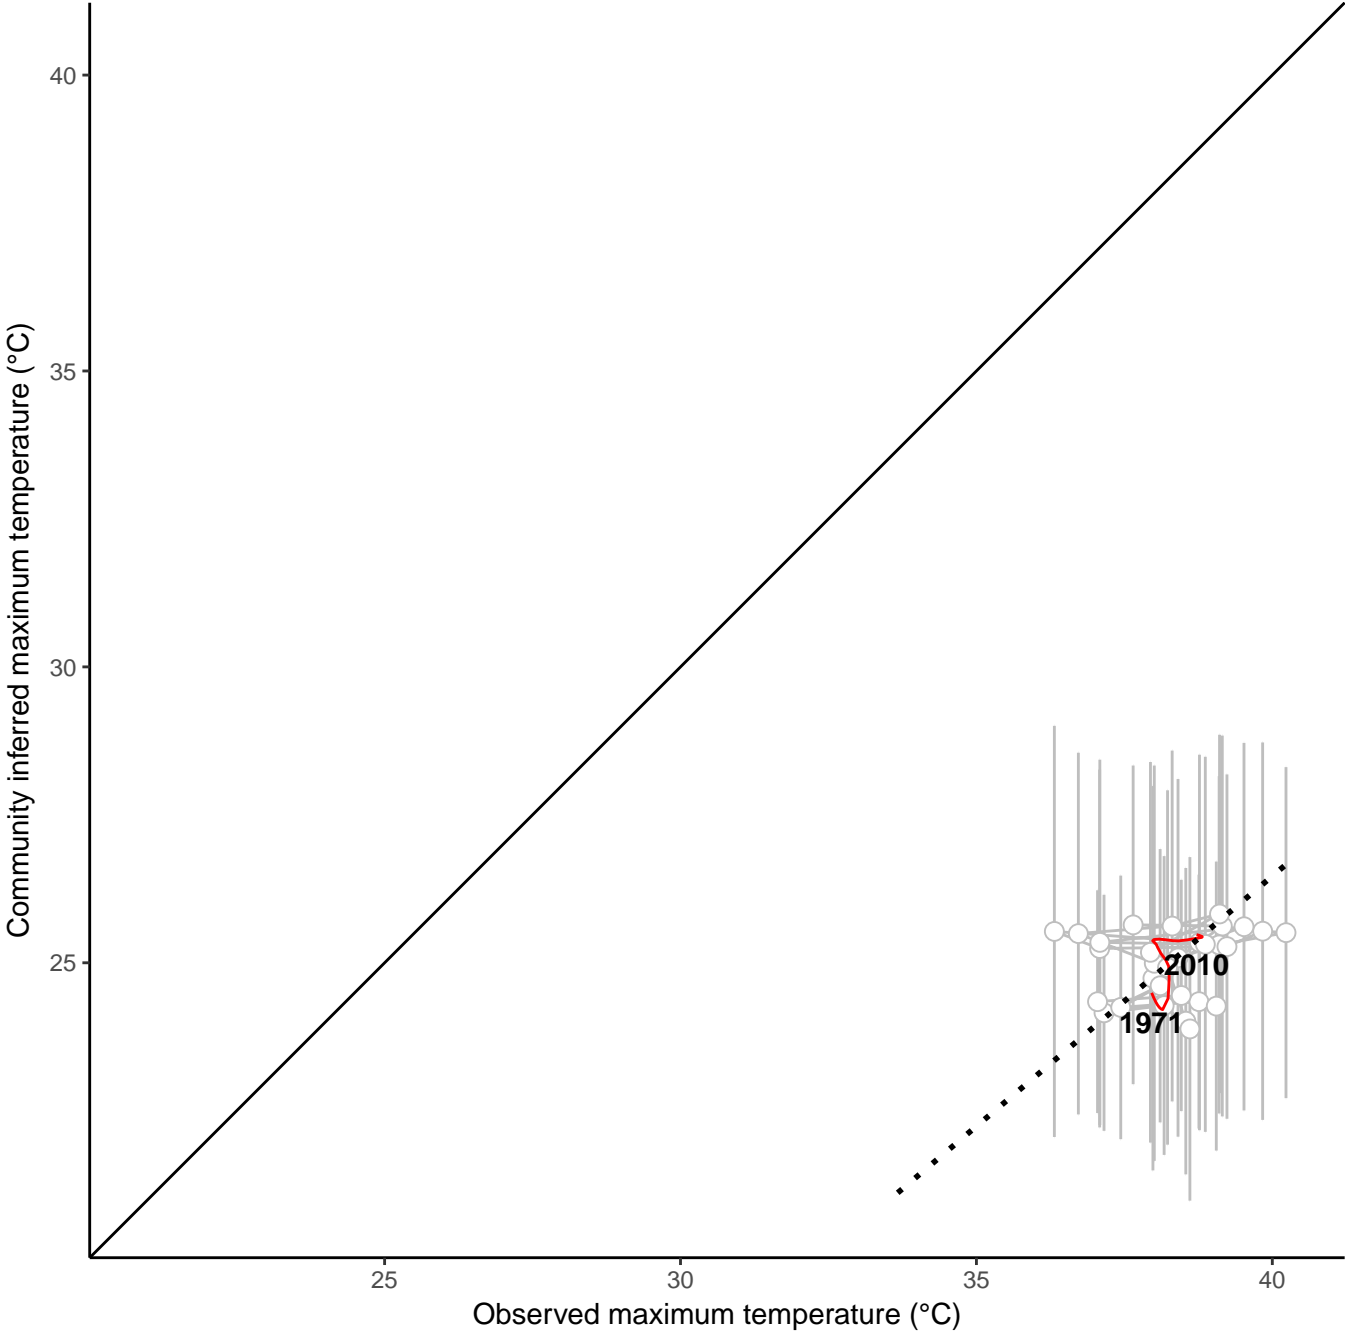

site : 840\_14\_151

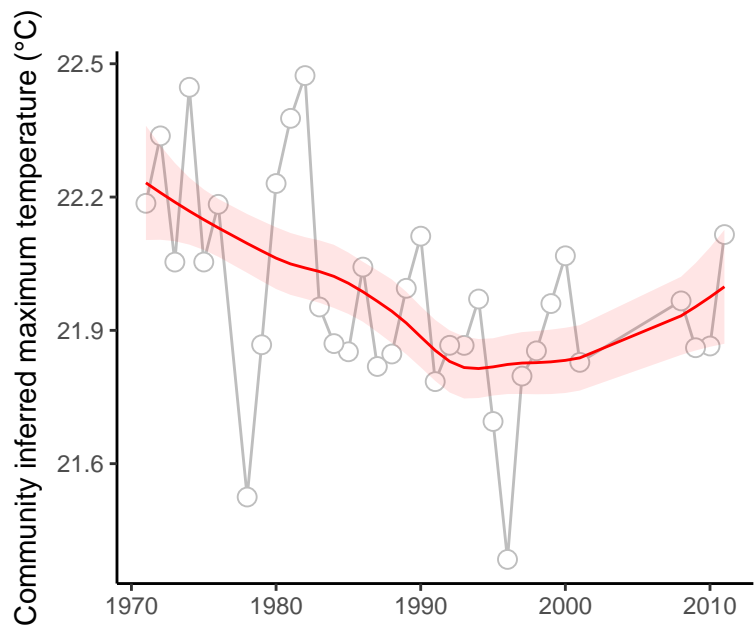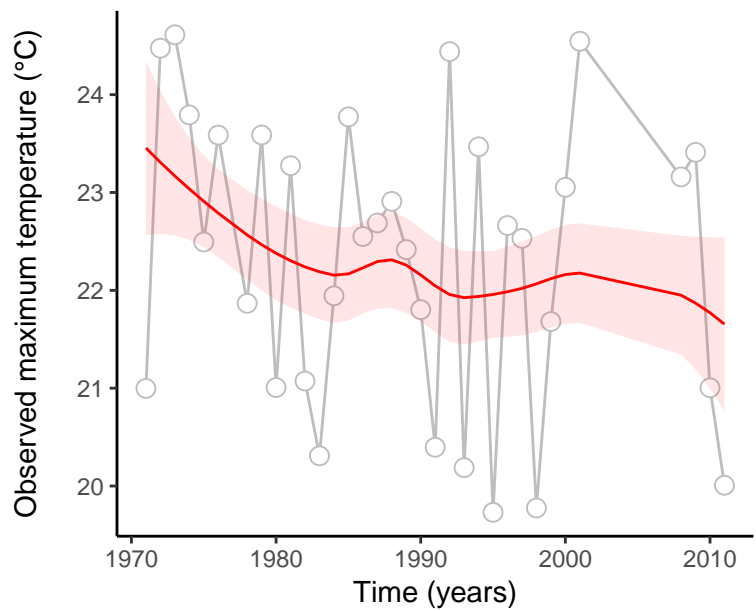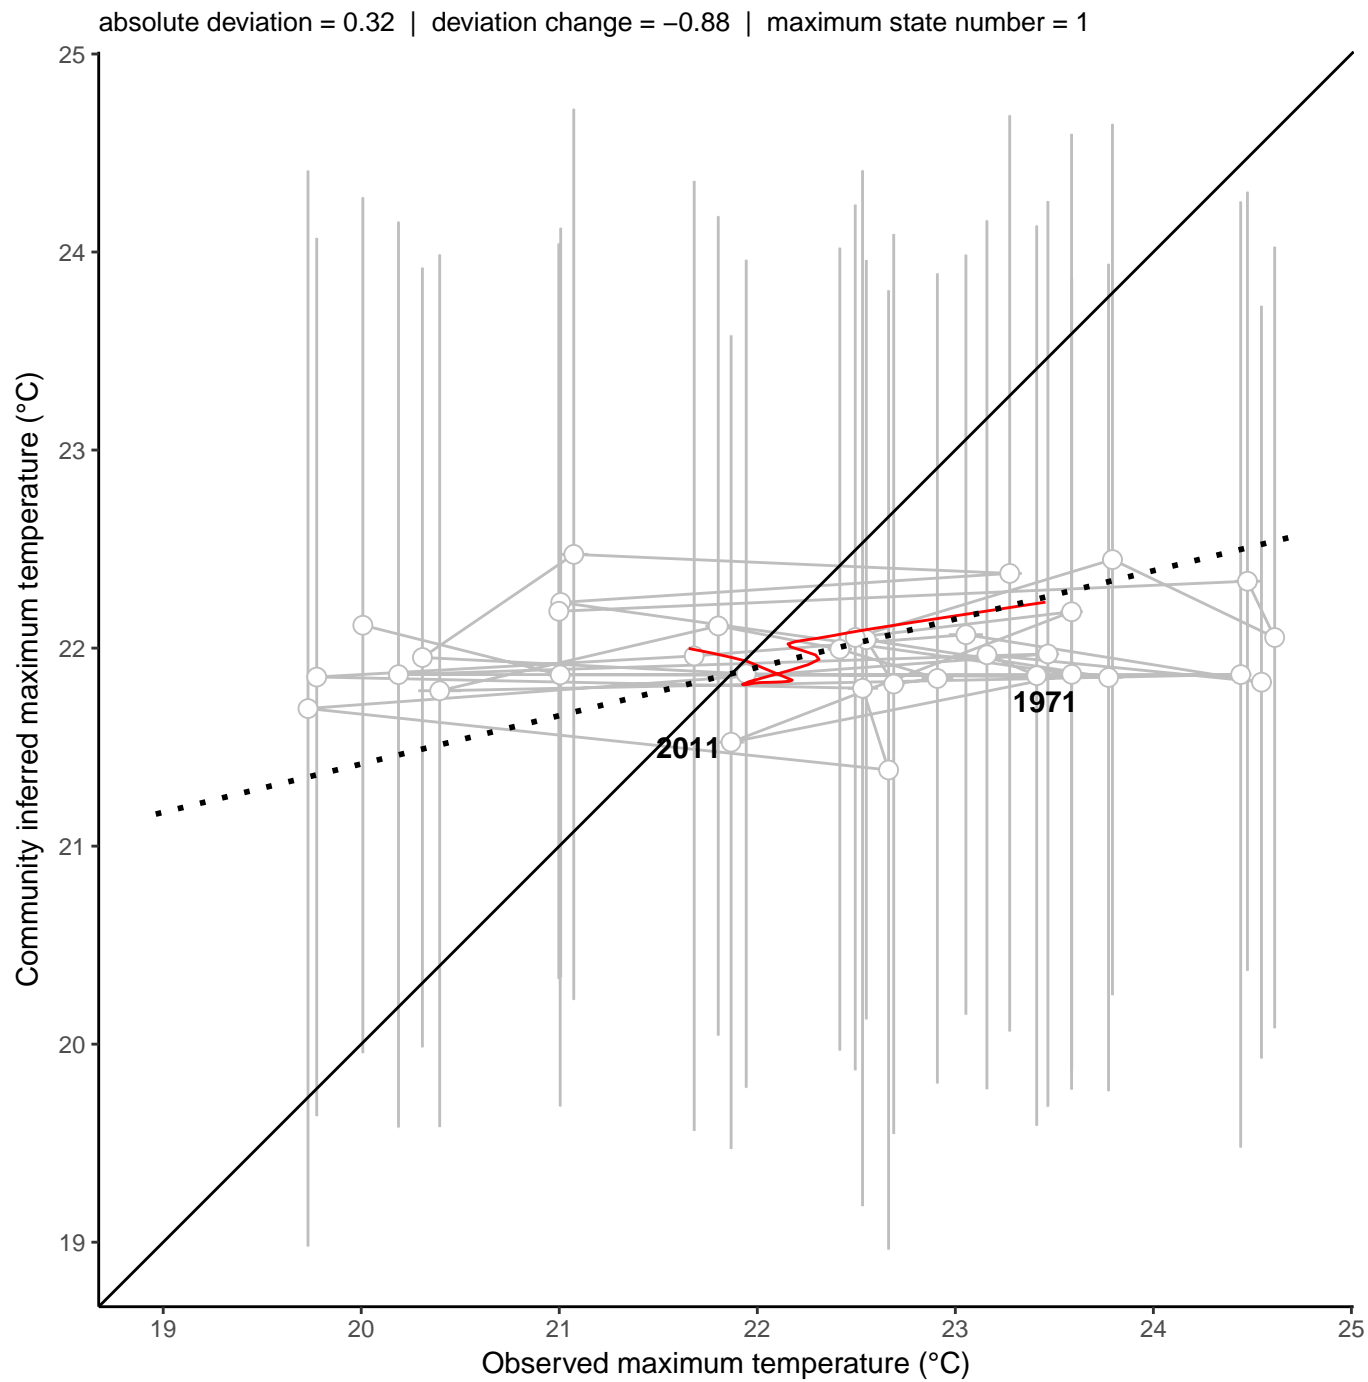

site : 840\_34\_23

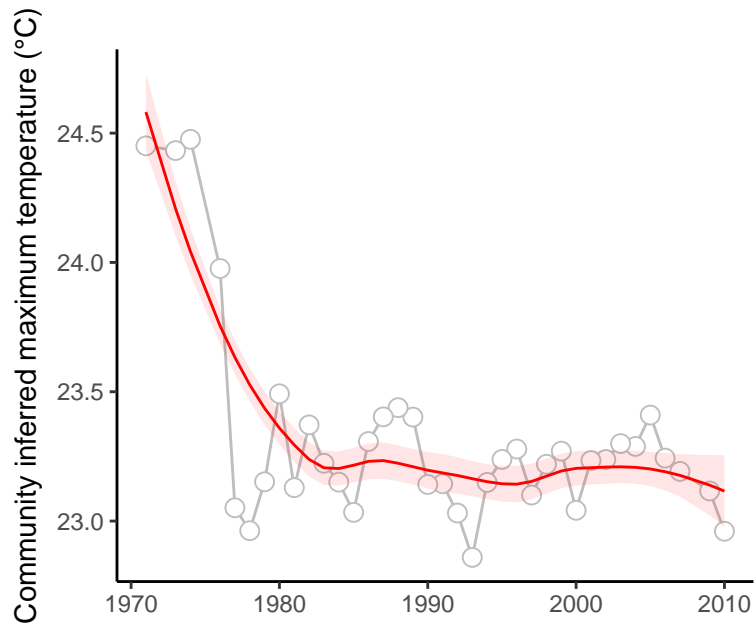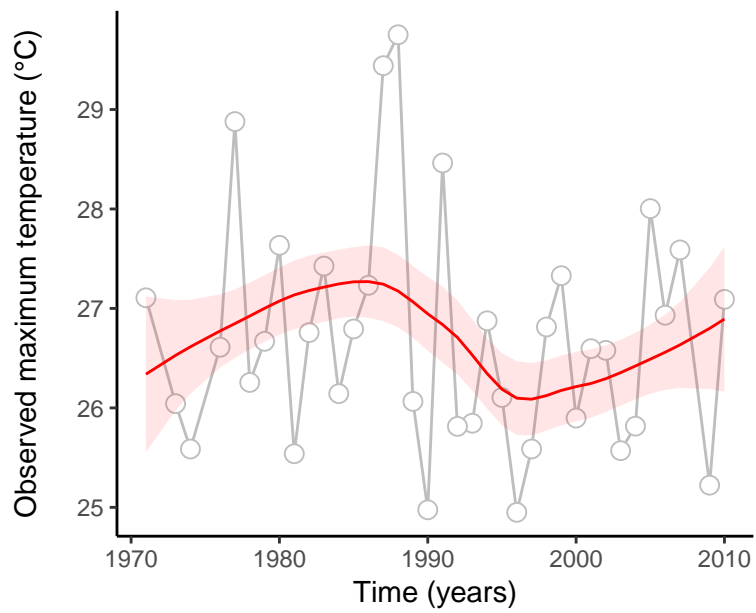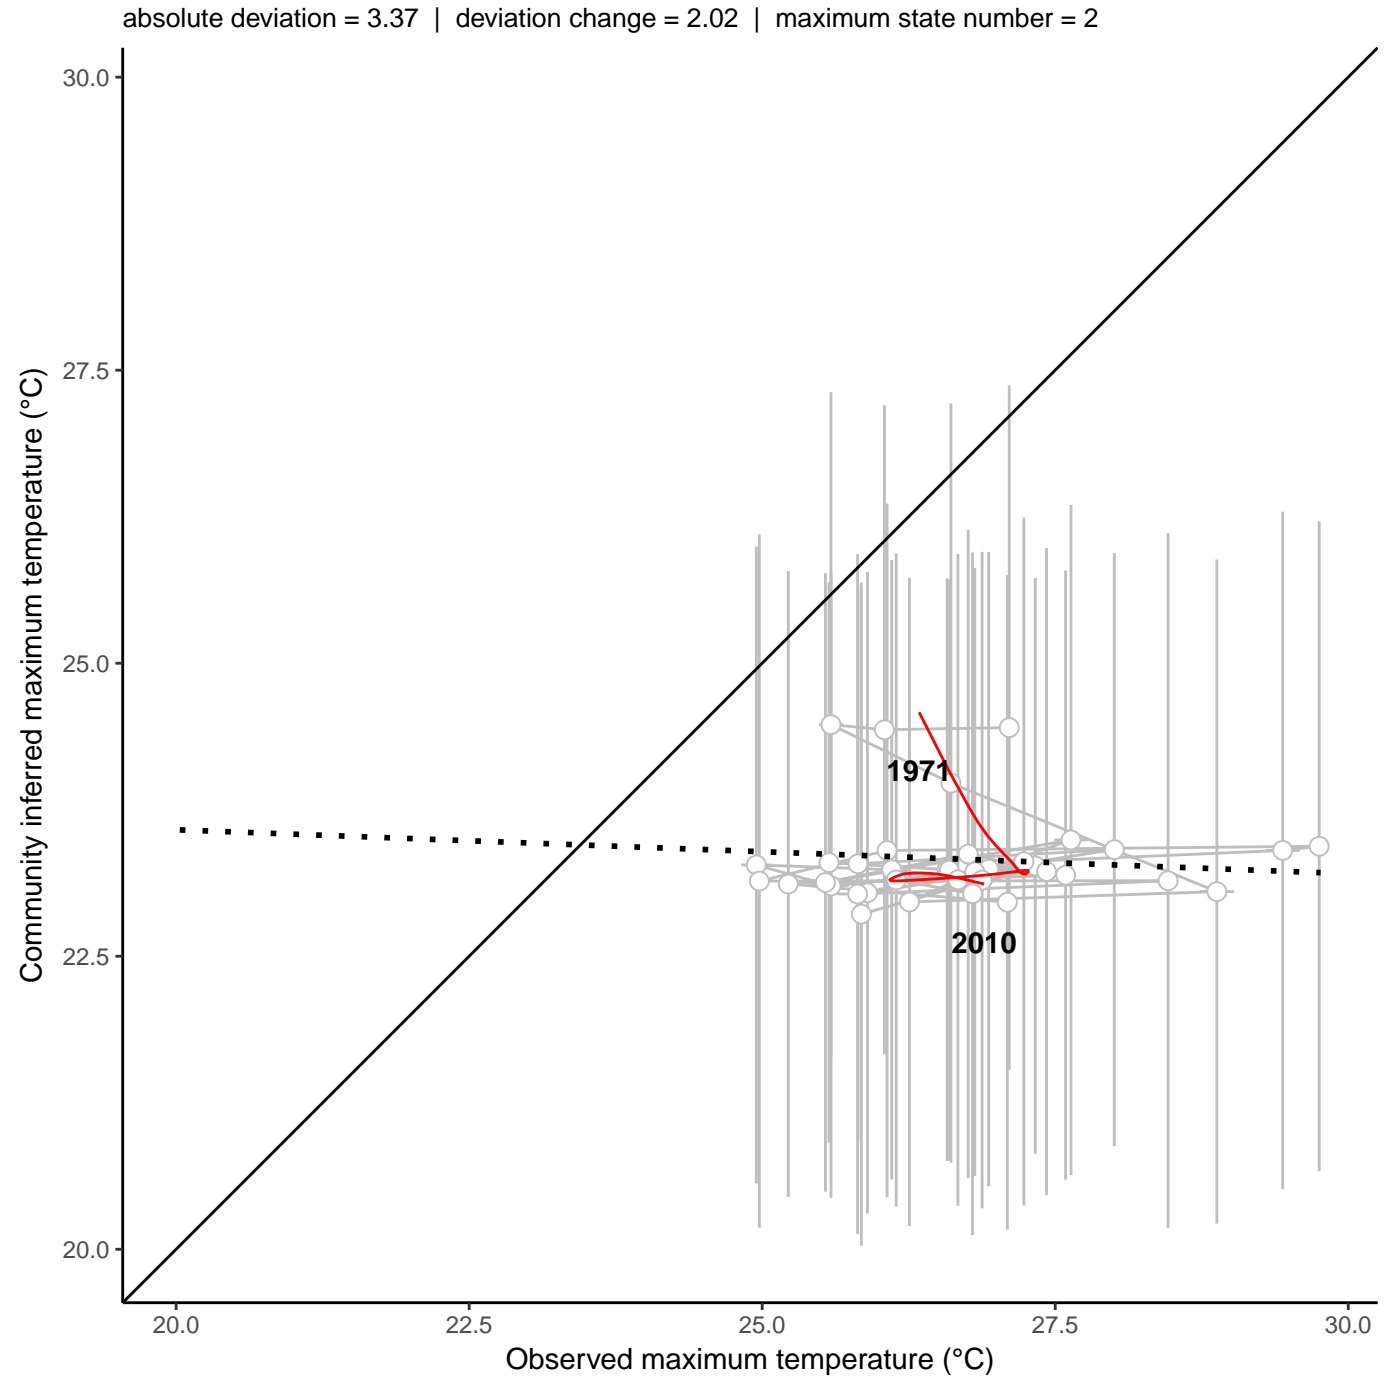

site : 840\_34\_37

absolute deviation = 3.48 | deviation change = 1.96 | maximum state number = 1

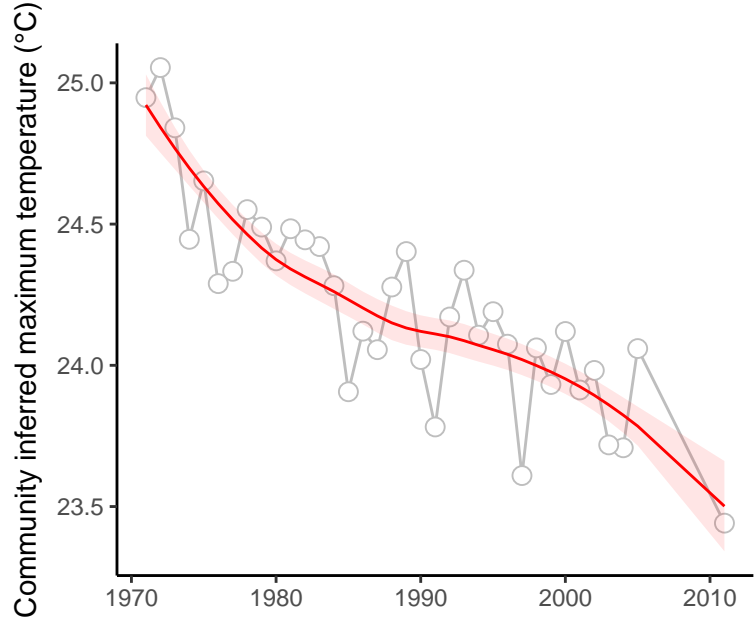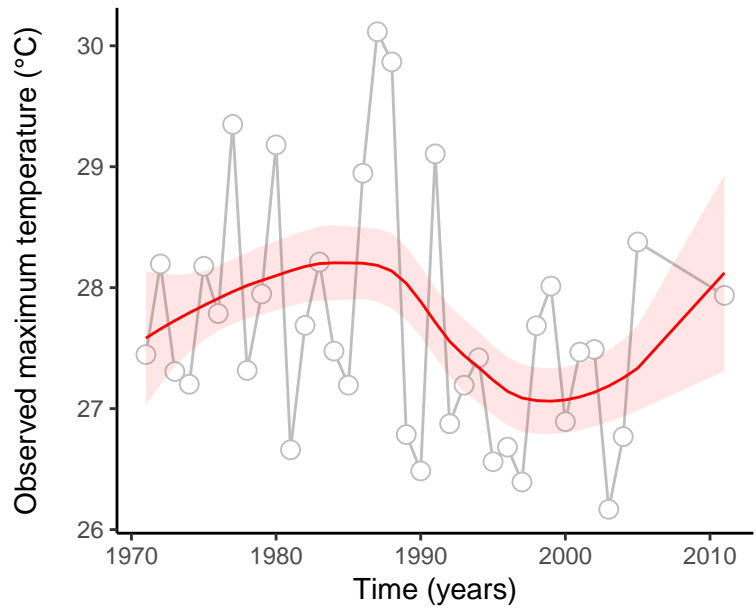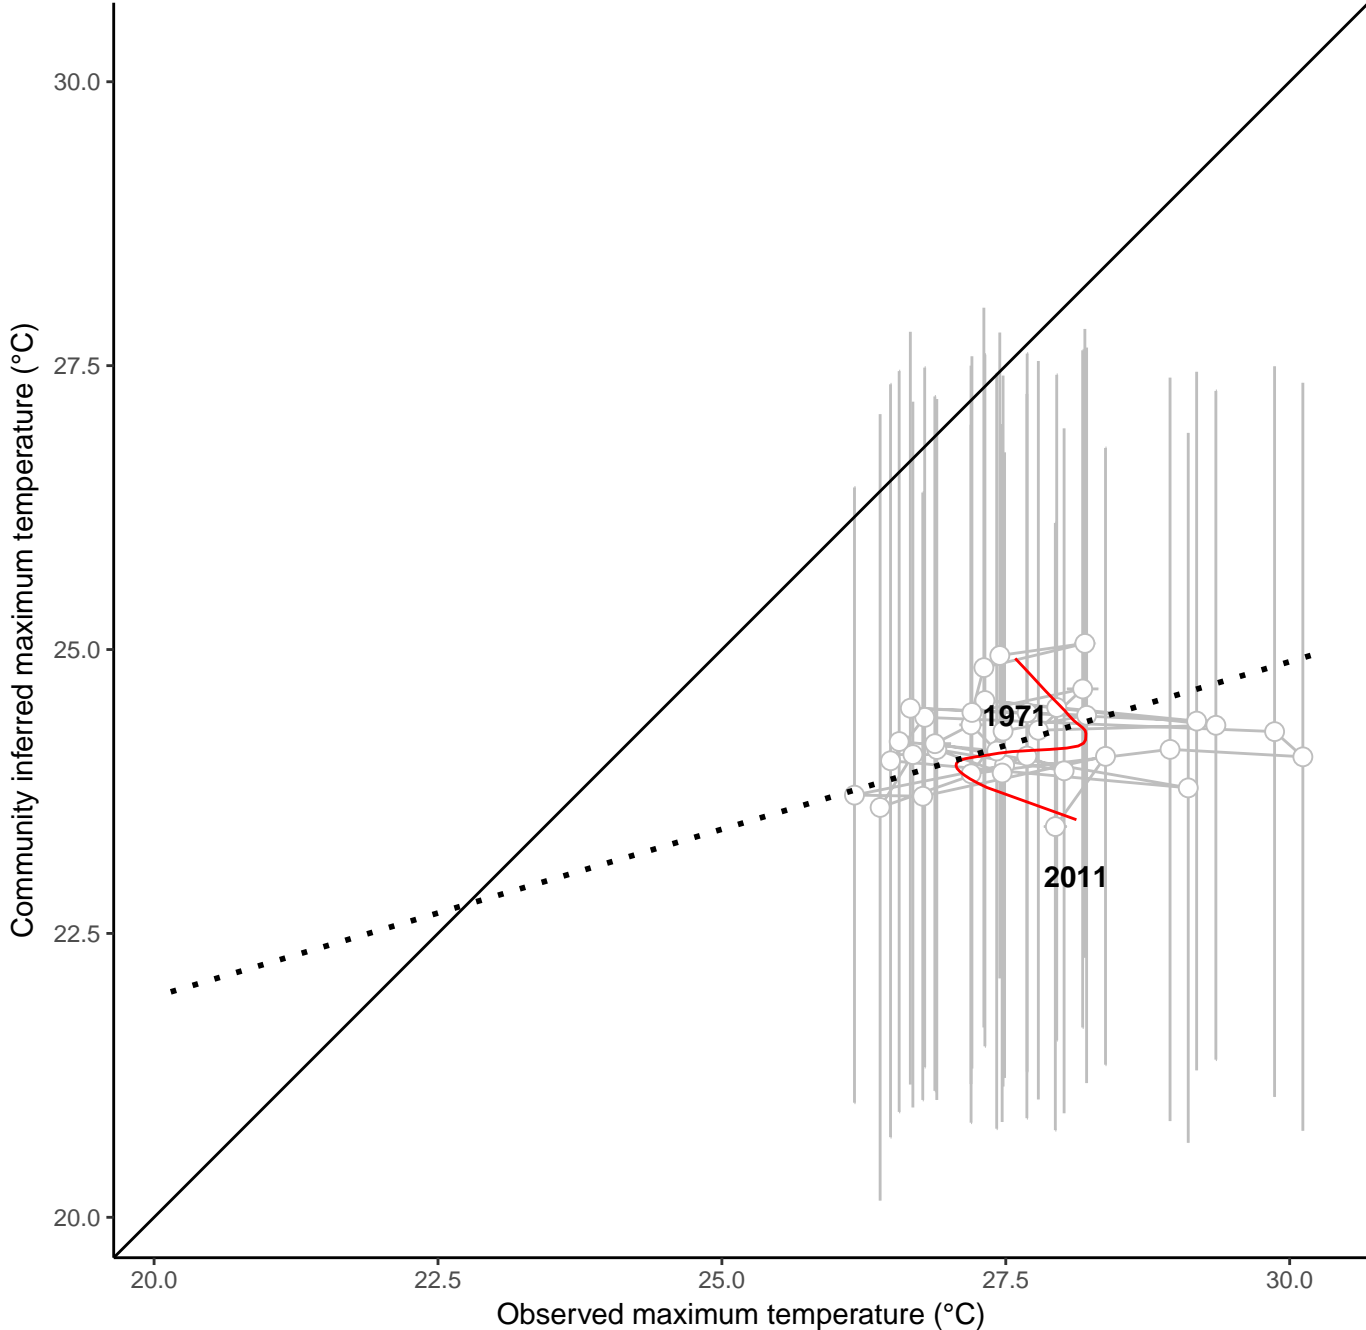

site : 840\_67\_34

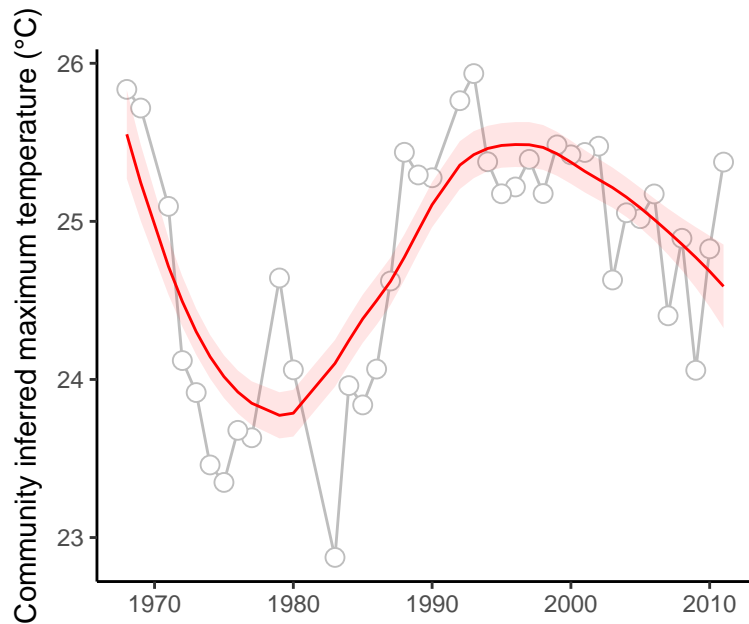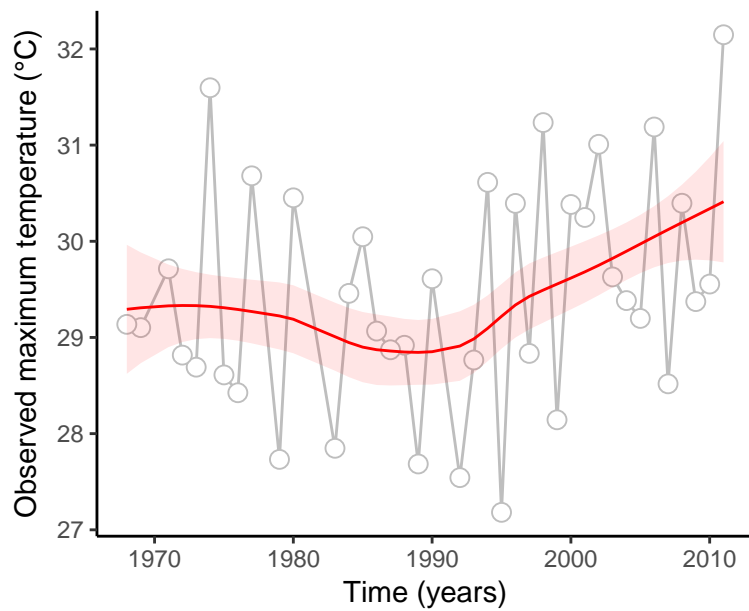

absolute deviation = 4.59 | deviation change = 2.08 | maximum state number = 3

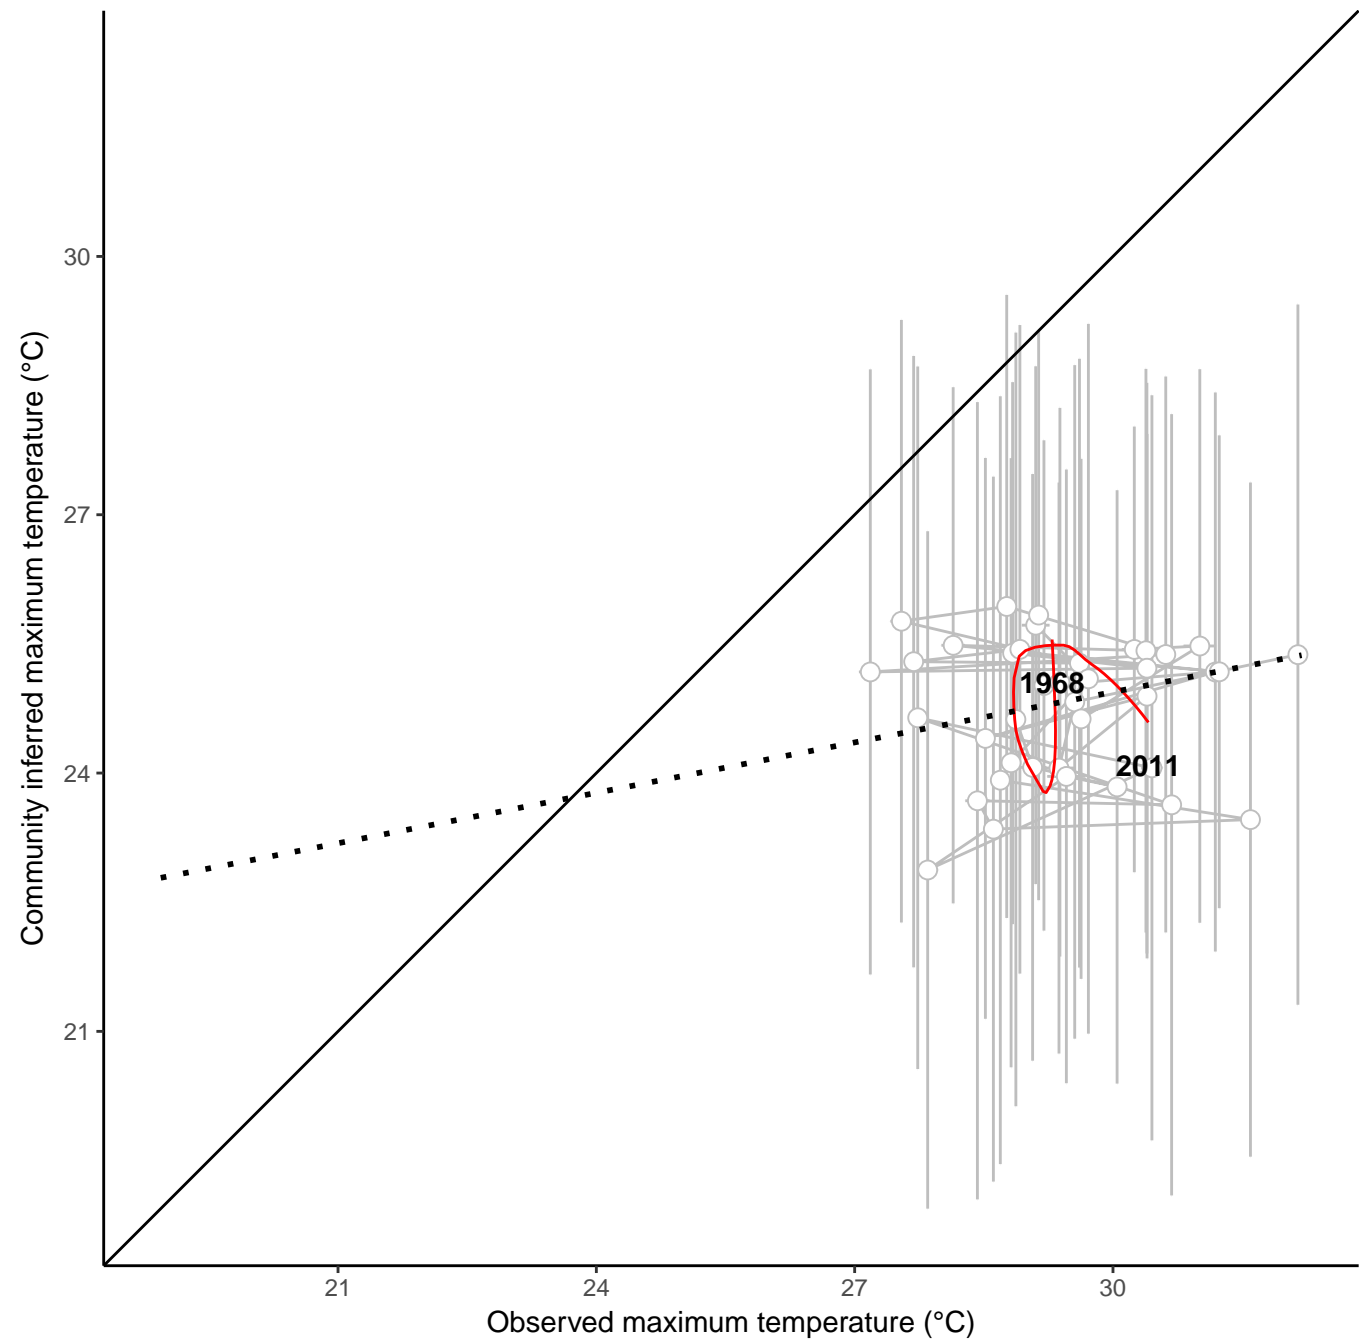

site : 840\_89\_21

absolute deviation = 4.87 | deviation change = -4.24 | maximum state number = 2

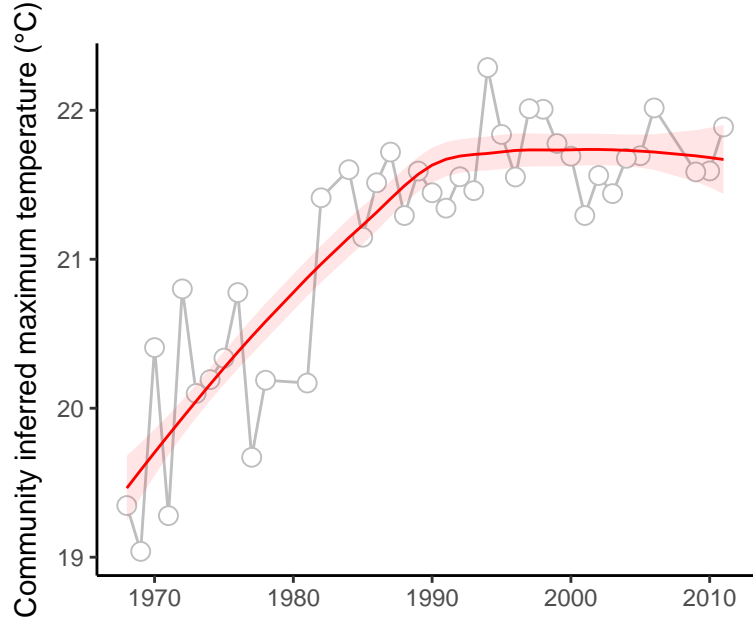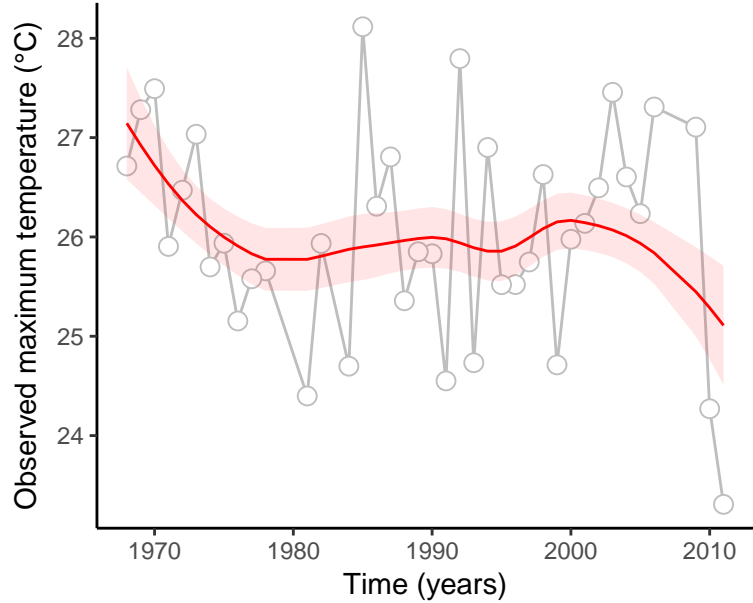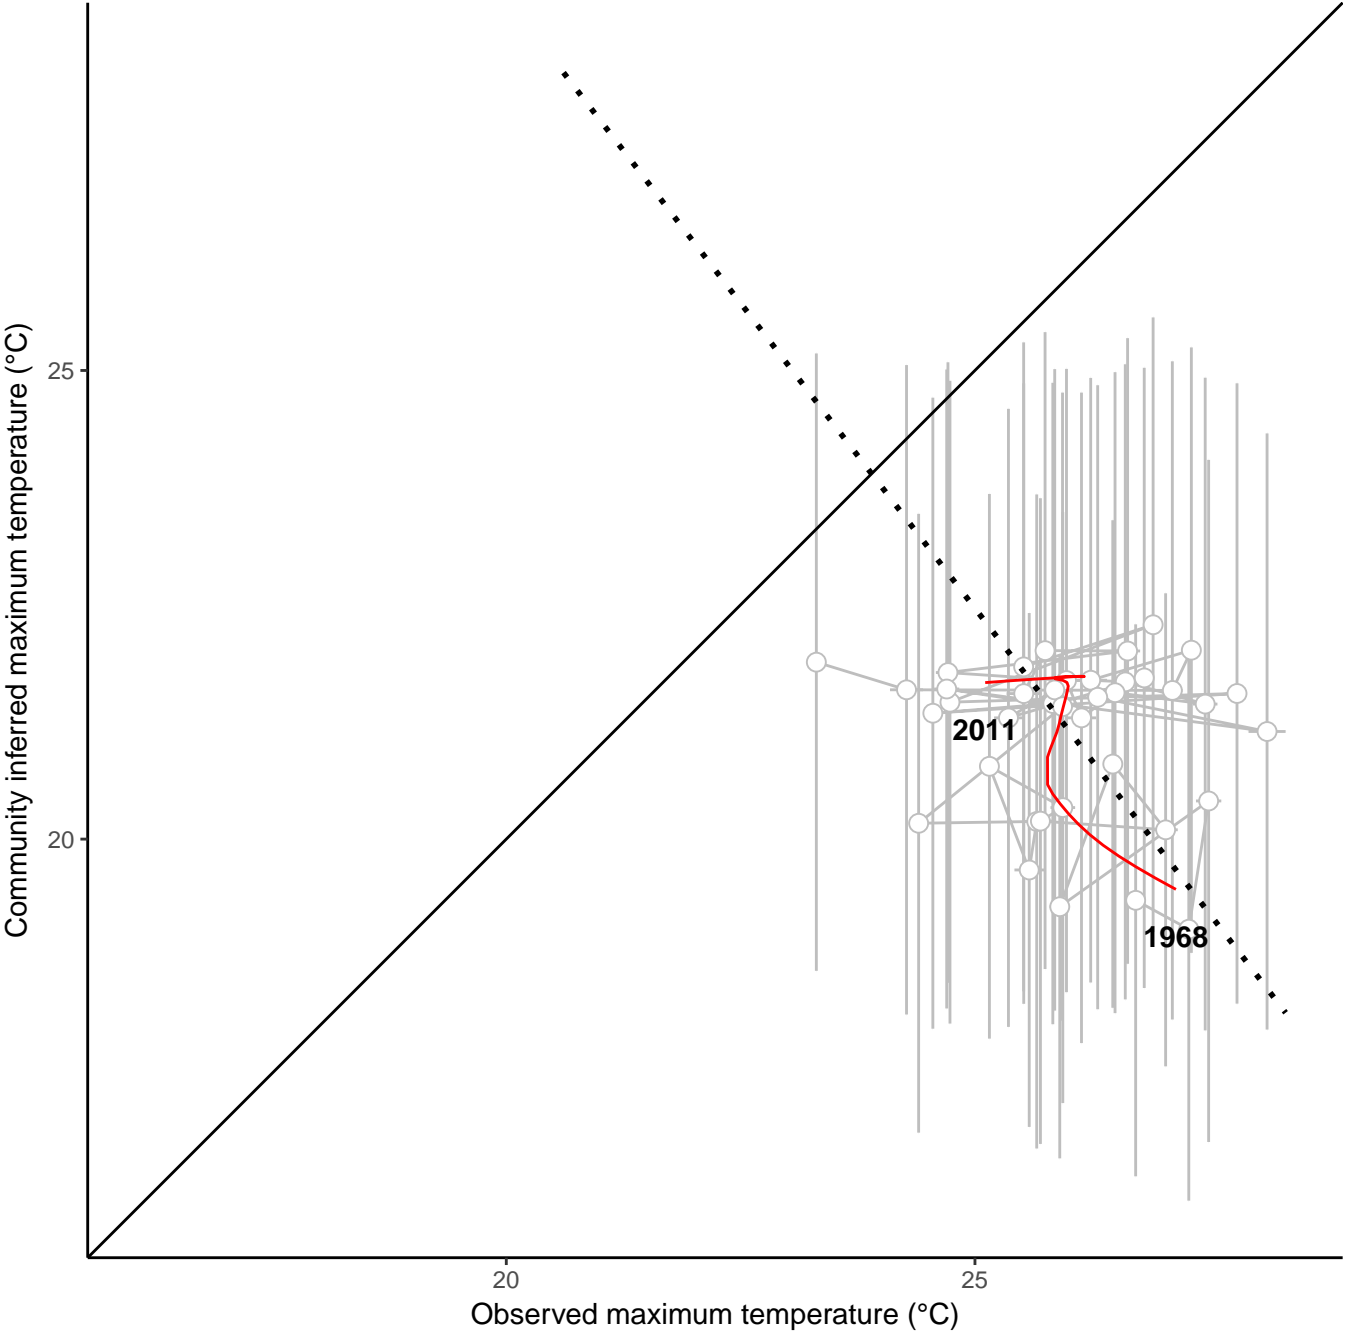

site : 840\_14\_162

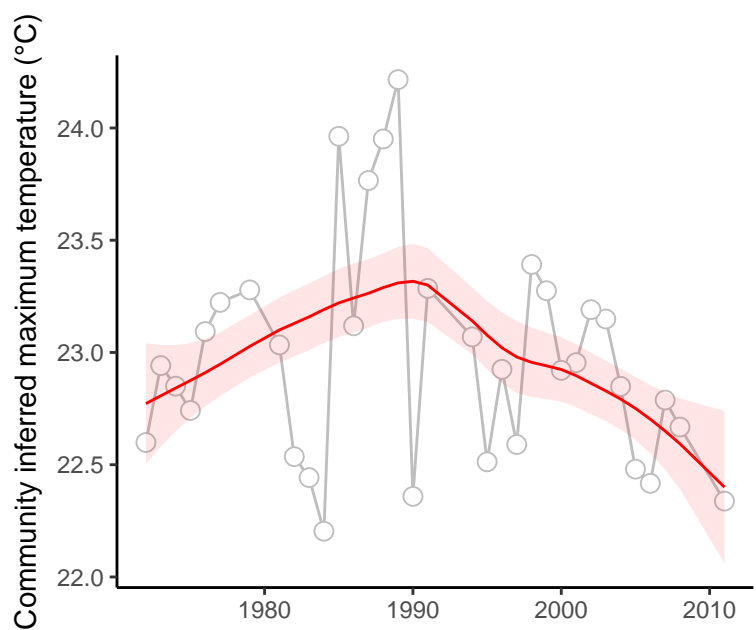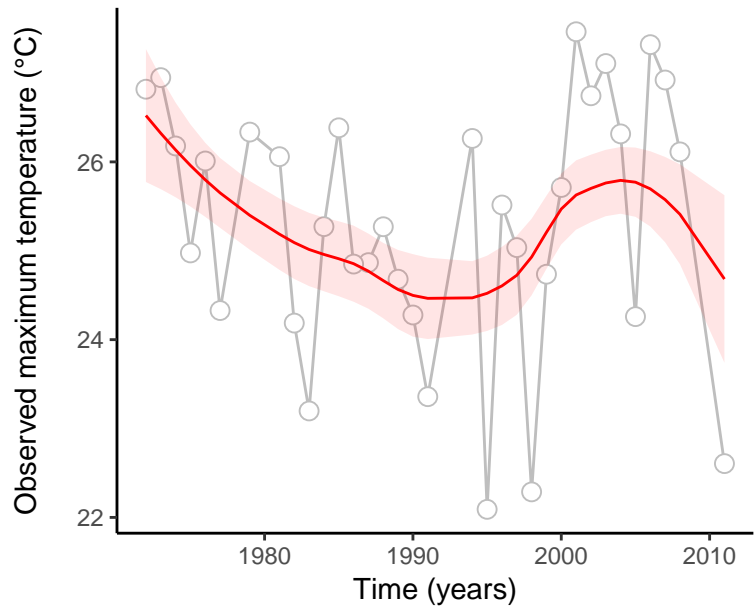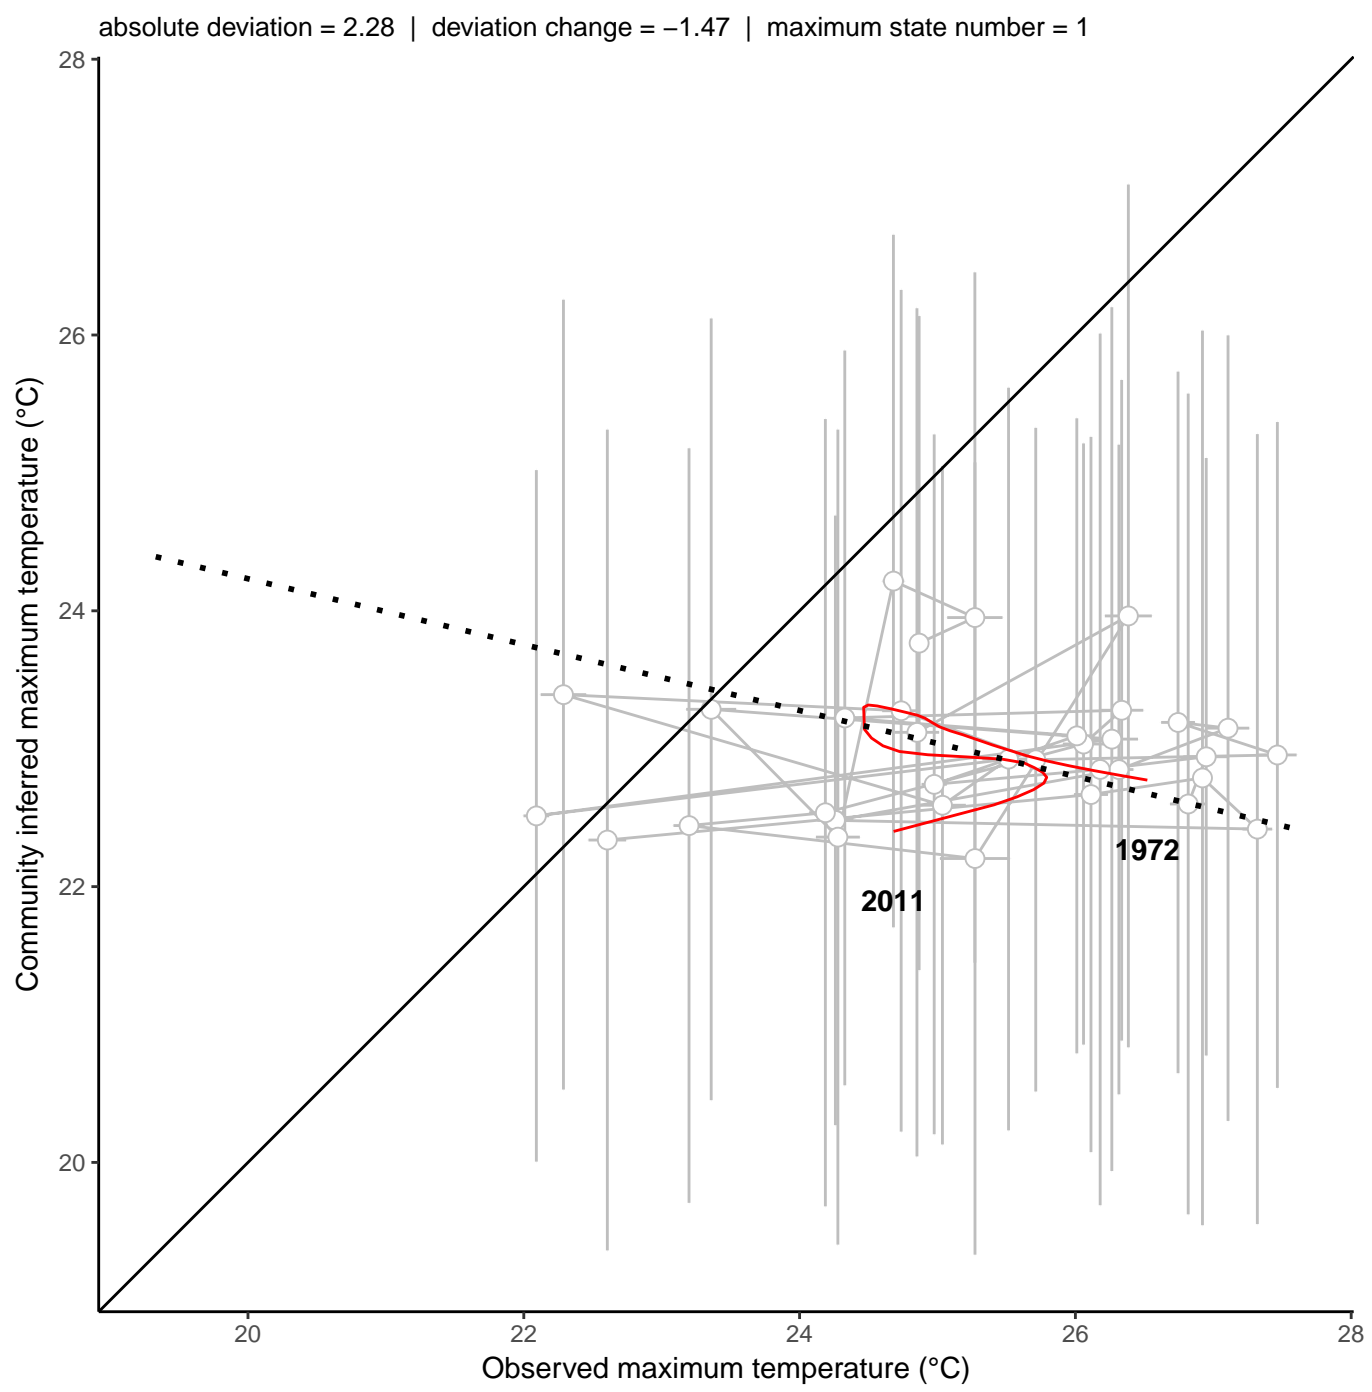

site : 840\_34\_13

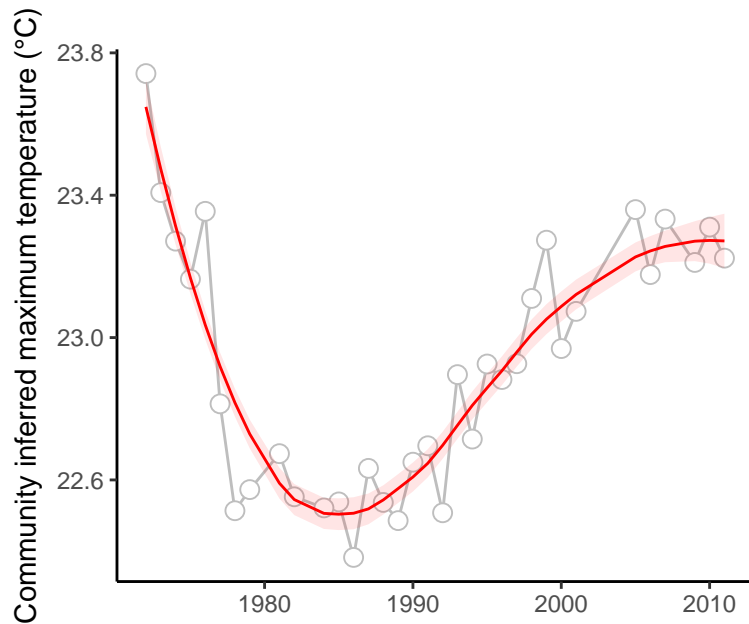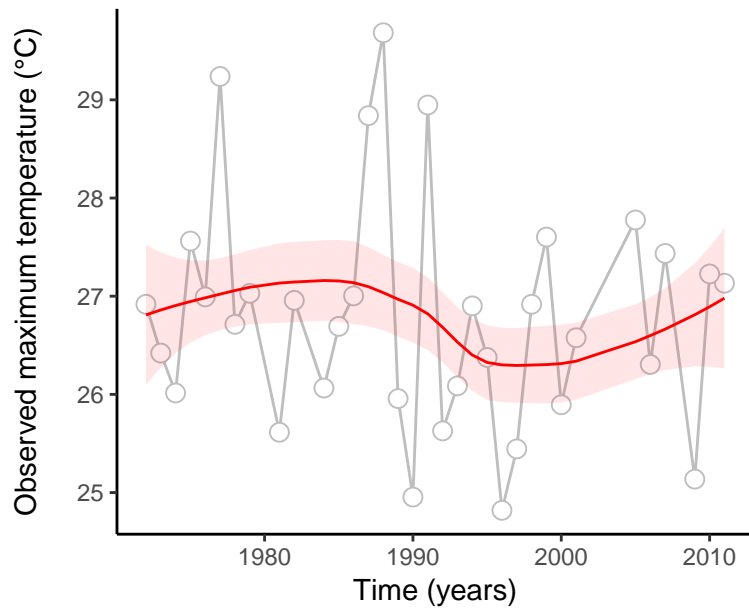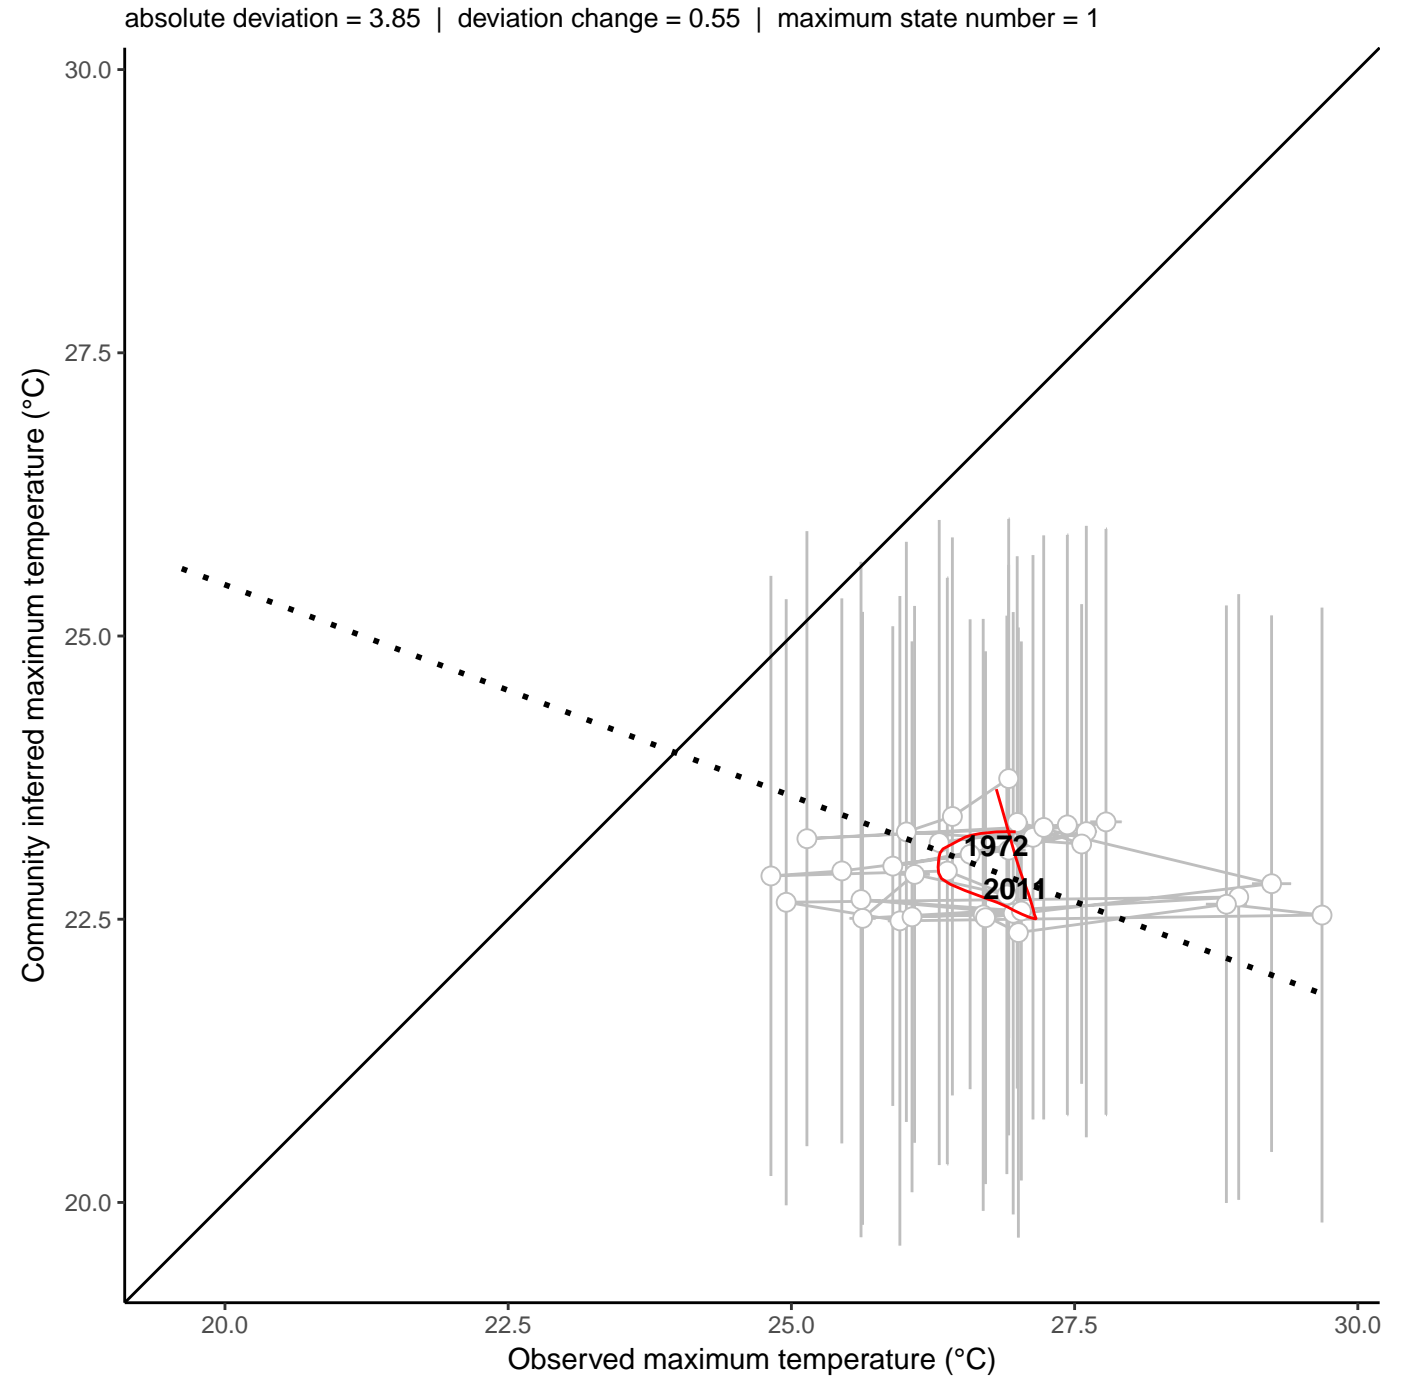



site : 840\_34\_42

absolute deviation = 4.67 | deviation change = 1.01 | maximum state number = 2

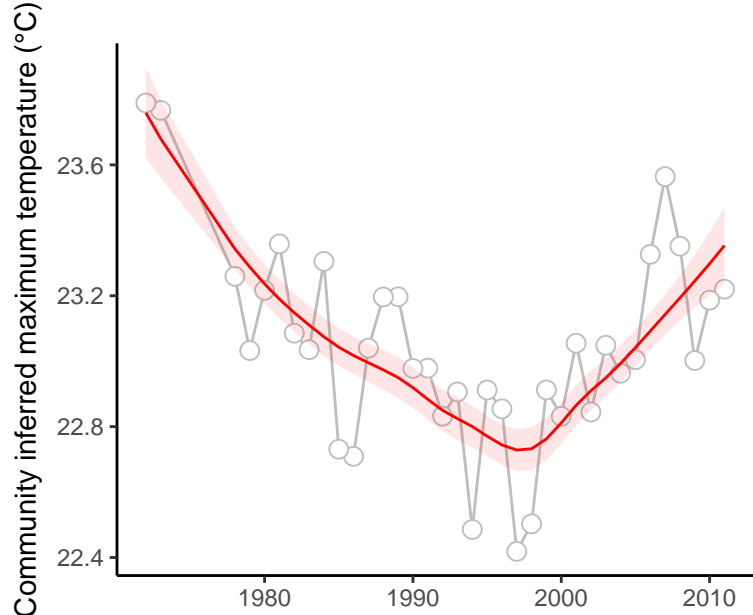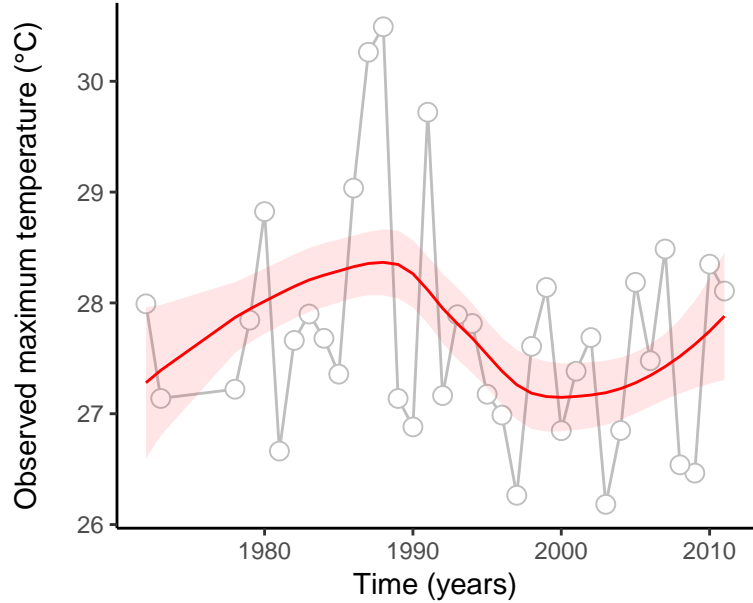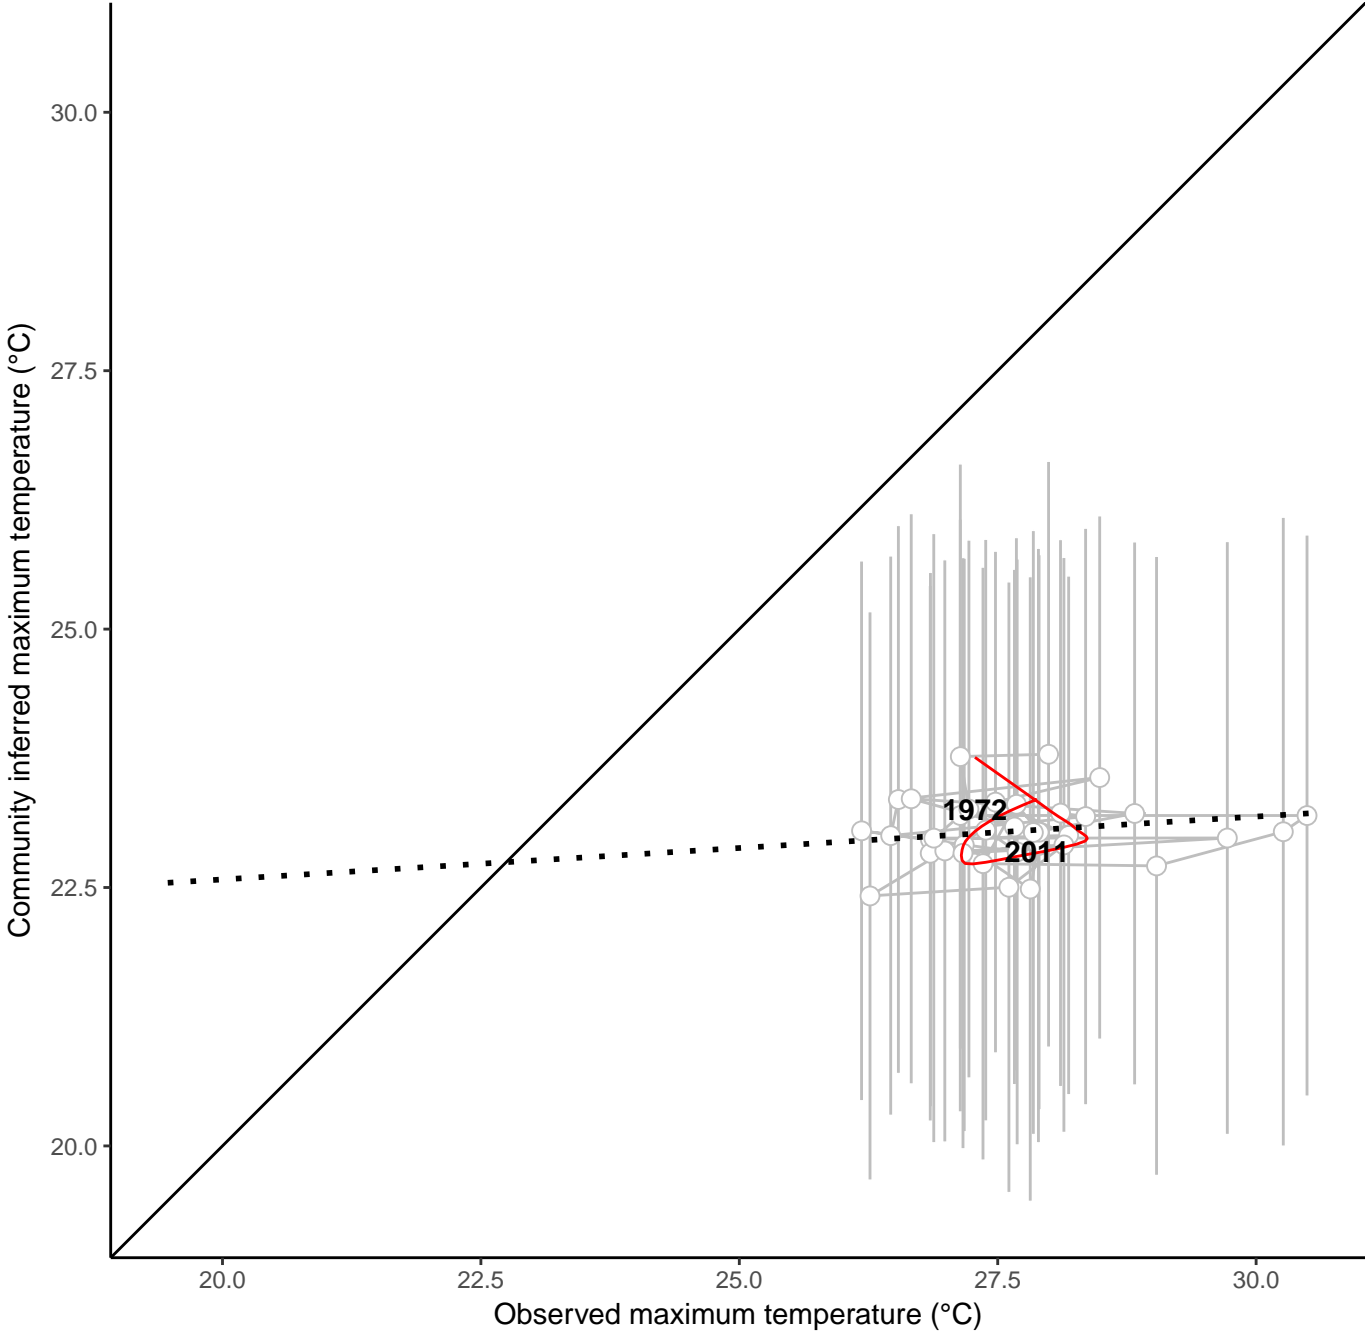

site : 840\_44\_1

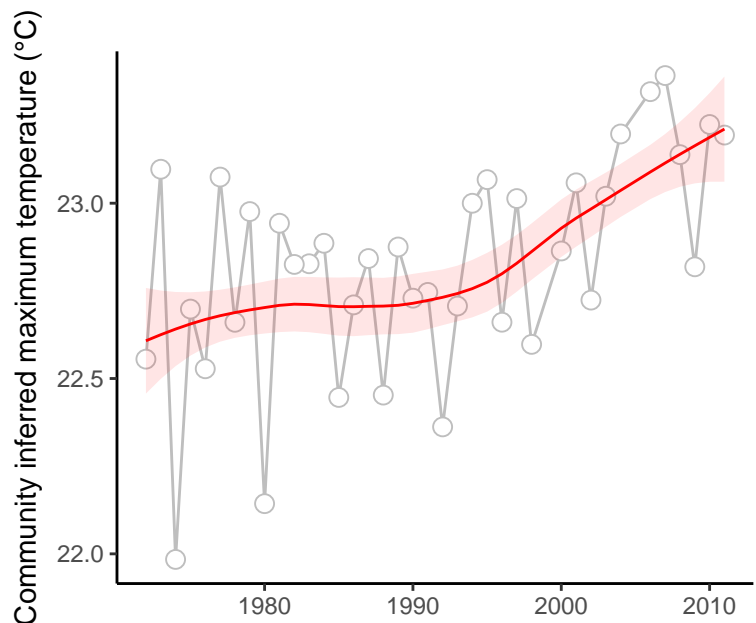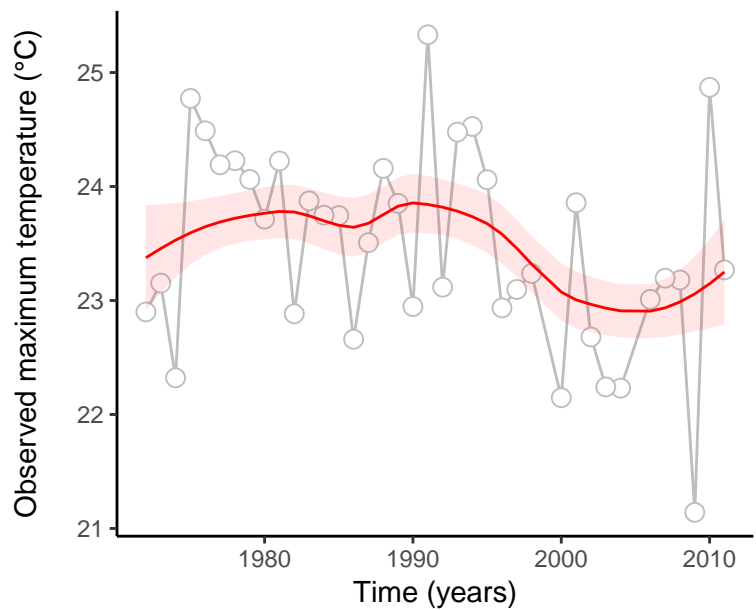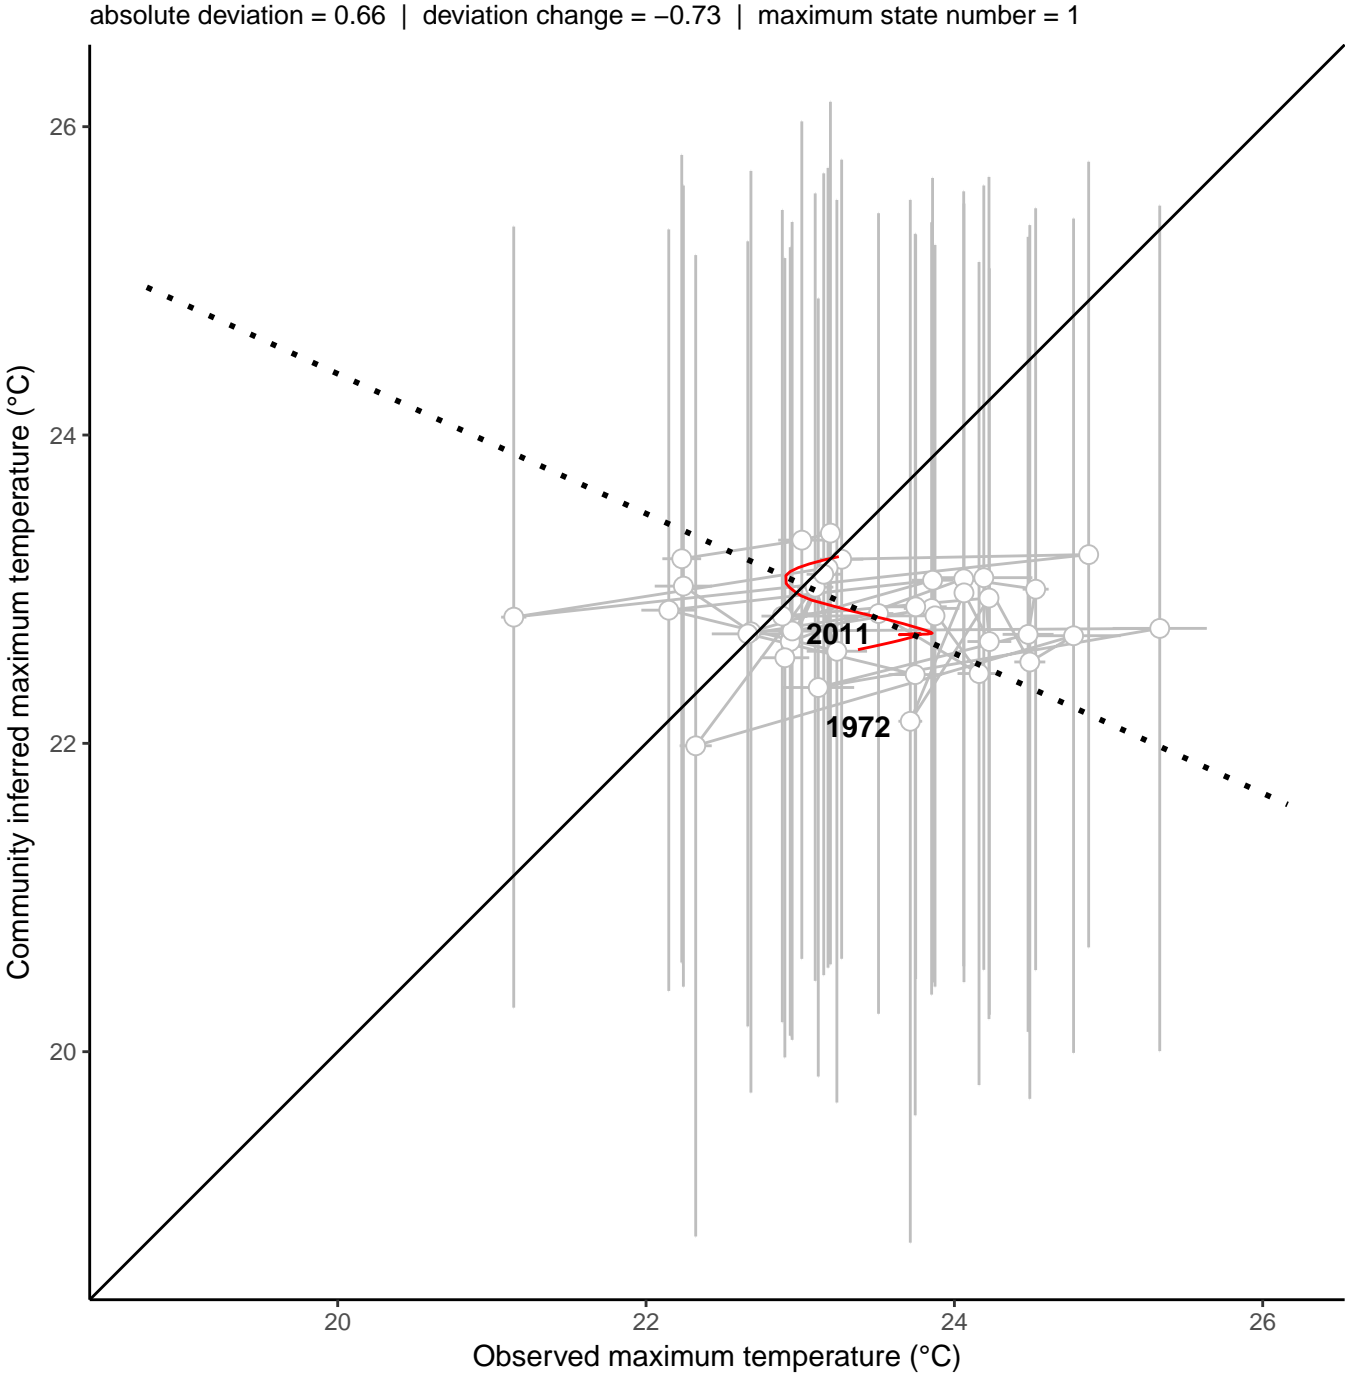

site : 840\_53\_17

absolute deviation = 1.18 | deviation change = -1.12 | maximum state number = 1

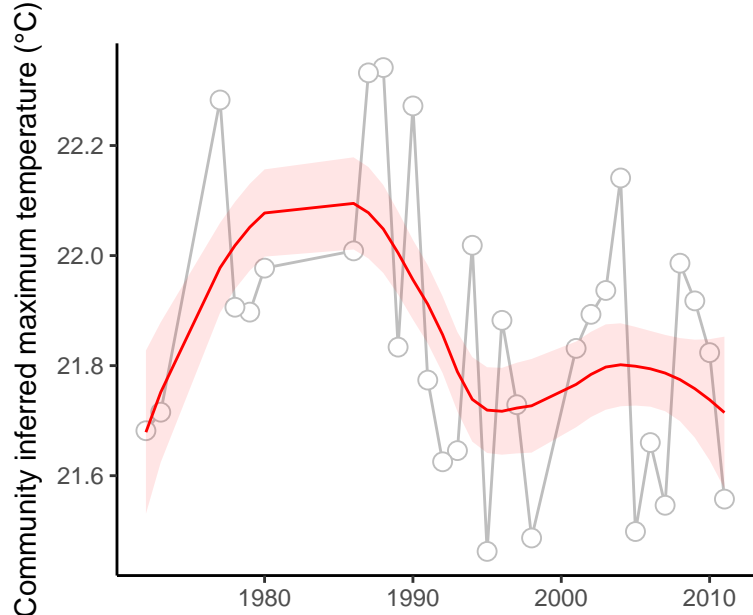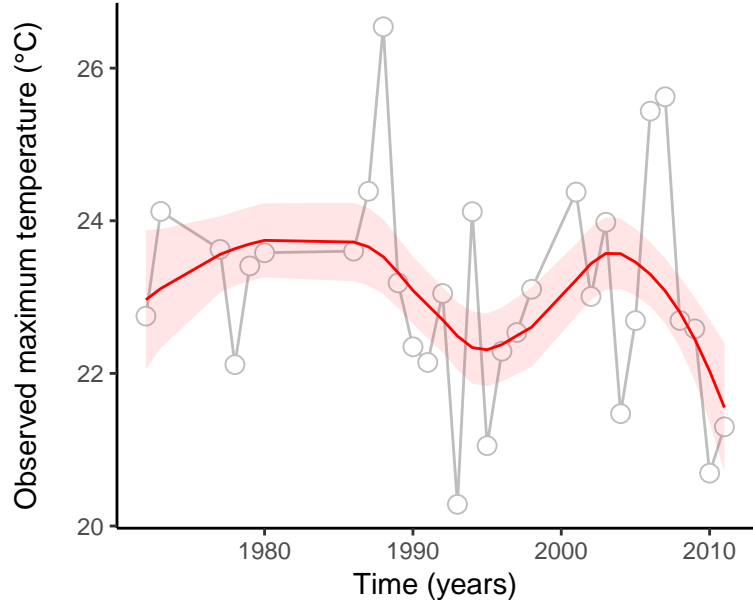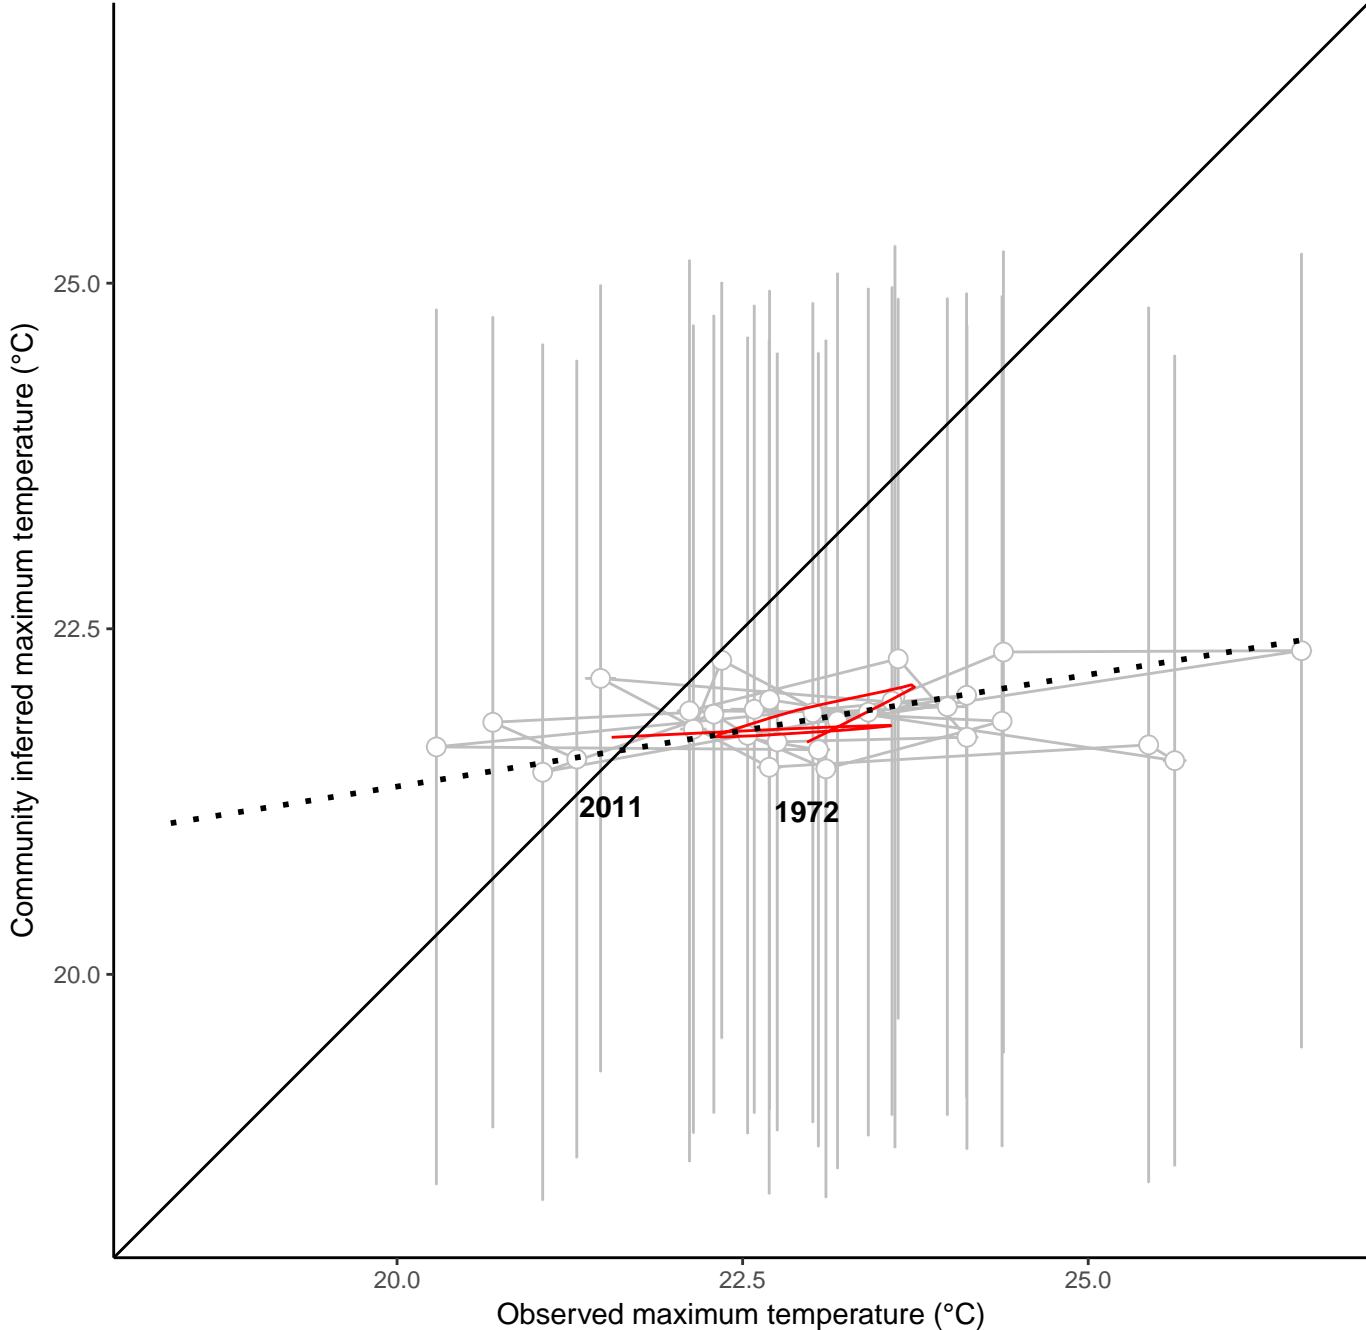

site : 840\_80\_5

absolute deviation = 5.1 | deviation change = 1.83 | maximum state number = 1

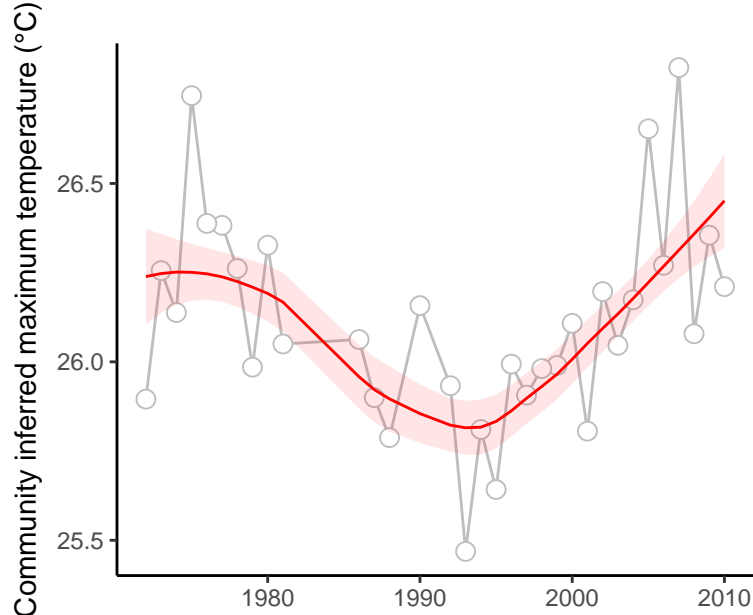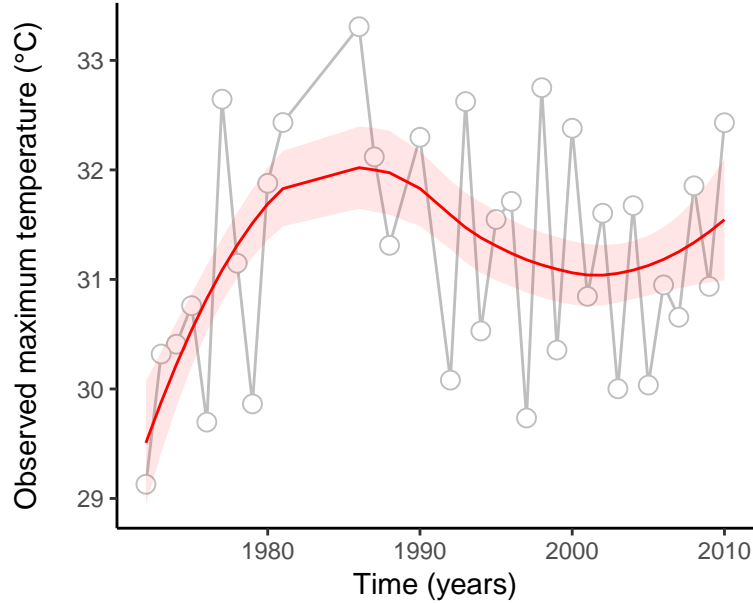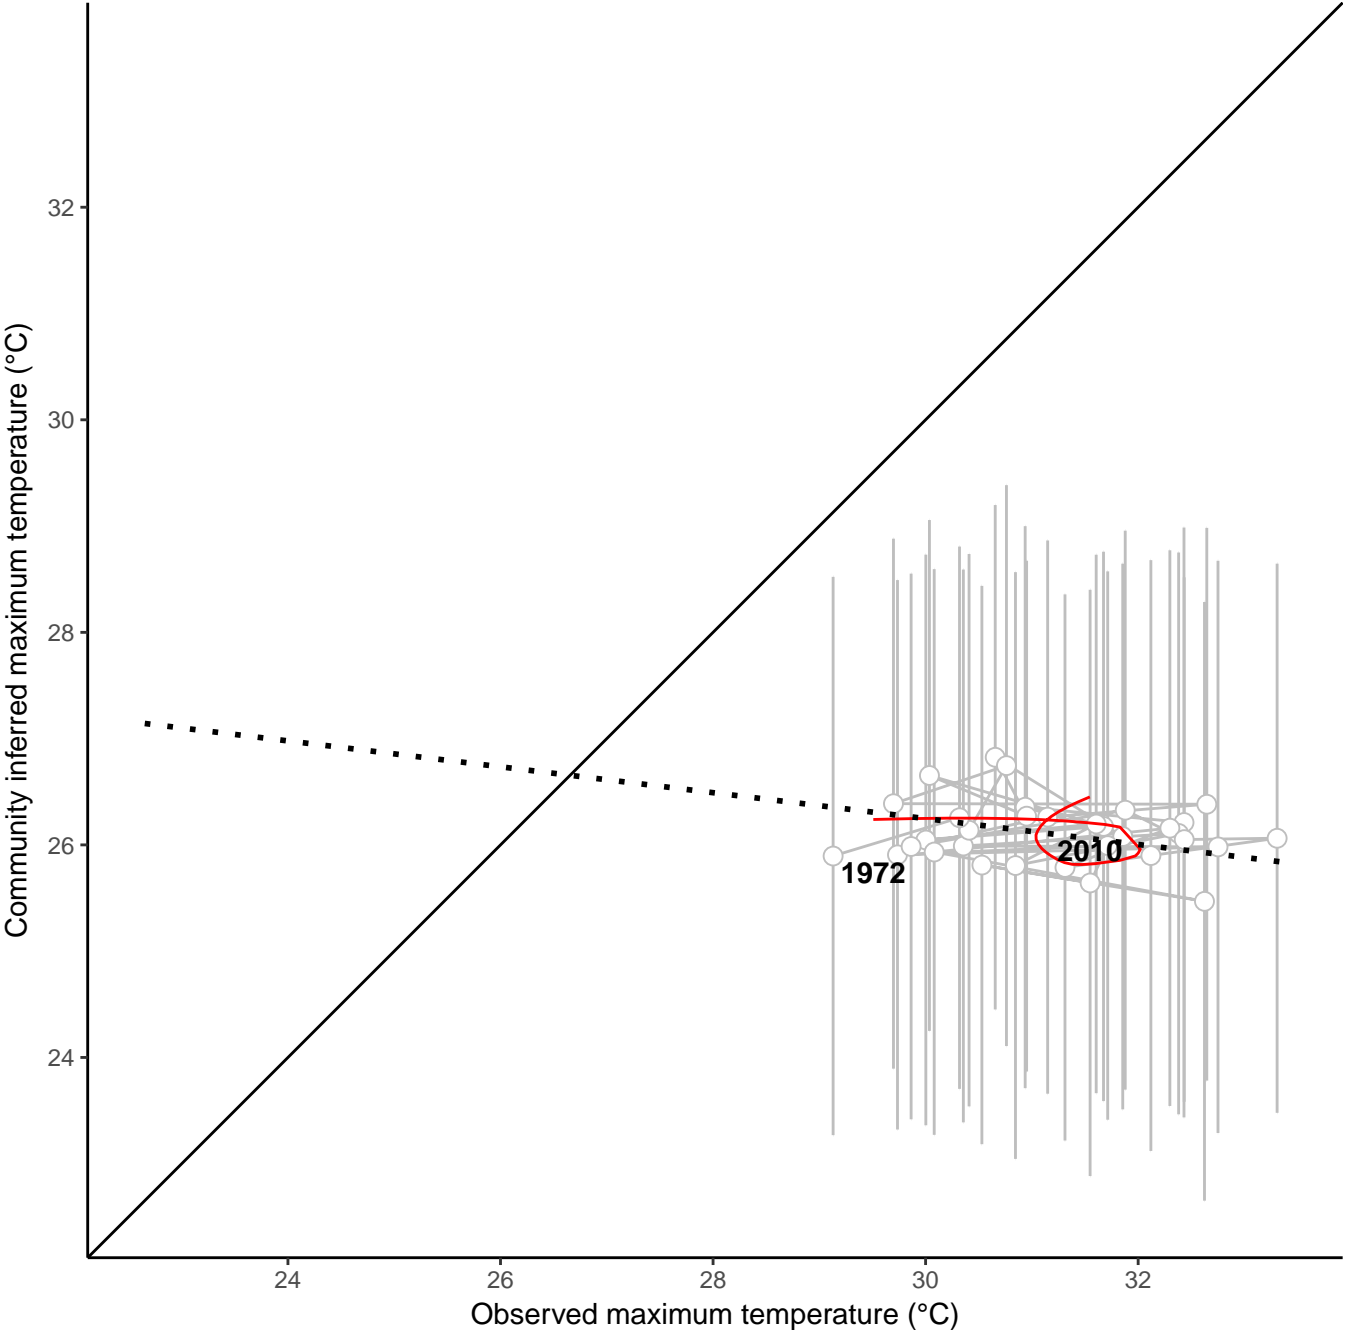

site : 840\_90\_48

absolute deviation = 2.03 | deviation change = 1.47 | maximum state number = 1

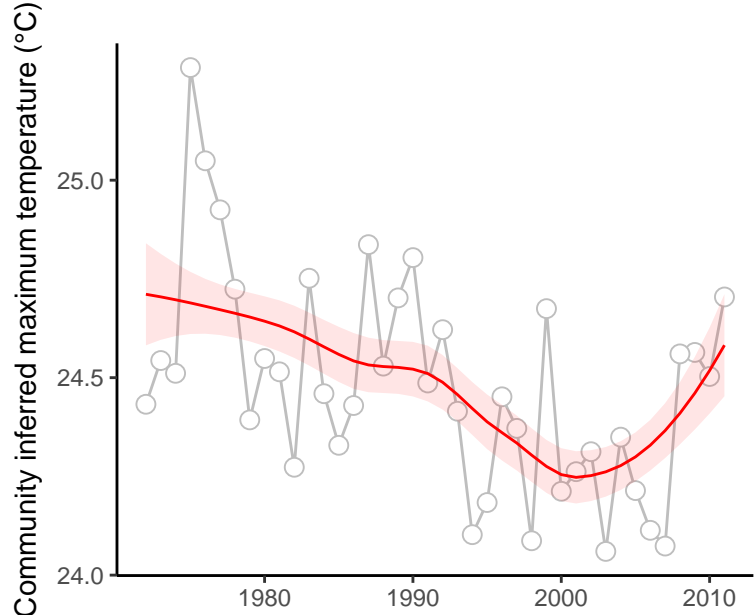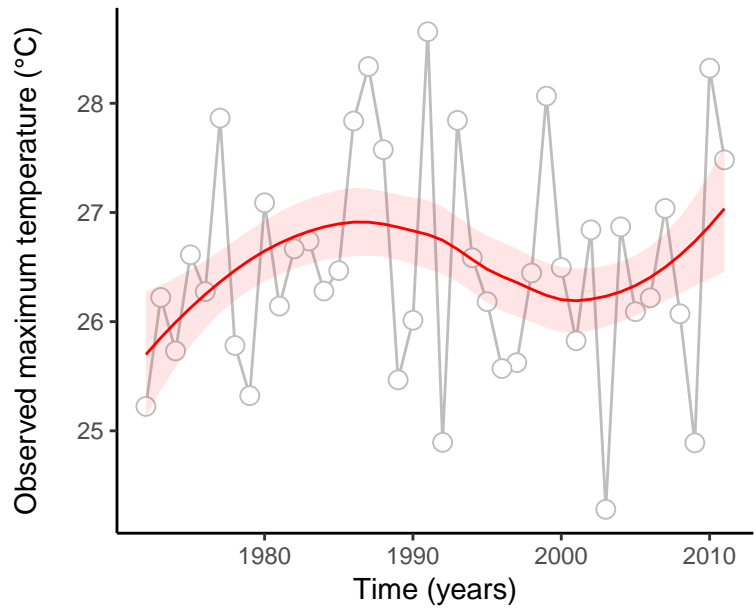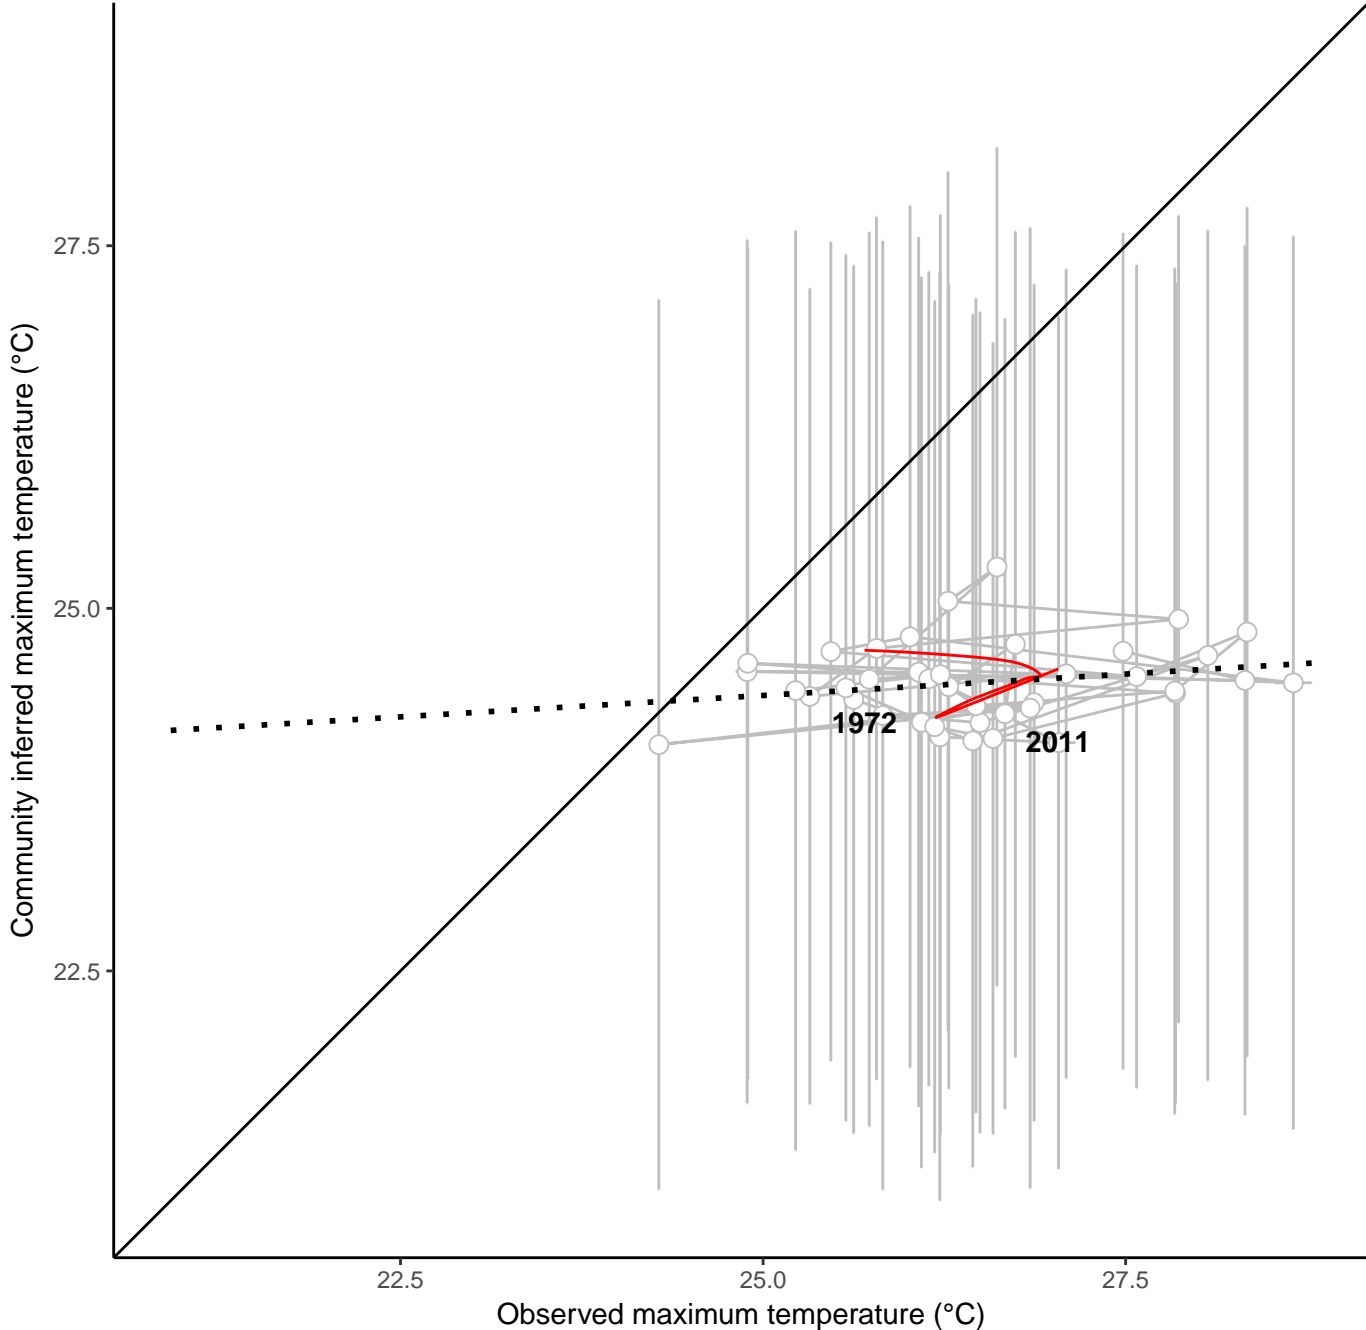

site : 840\_14\_89

absolute deviation = 12.8 | deviation change = -1.06 | maximum state number = 2

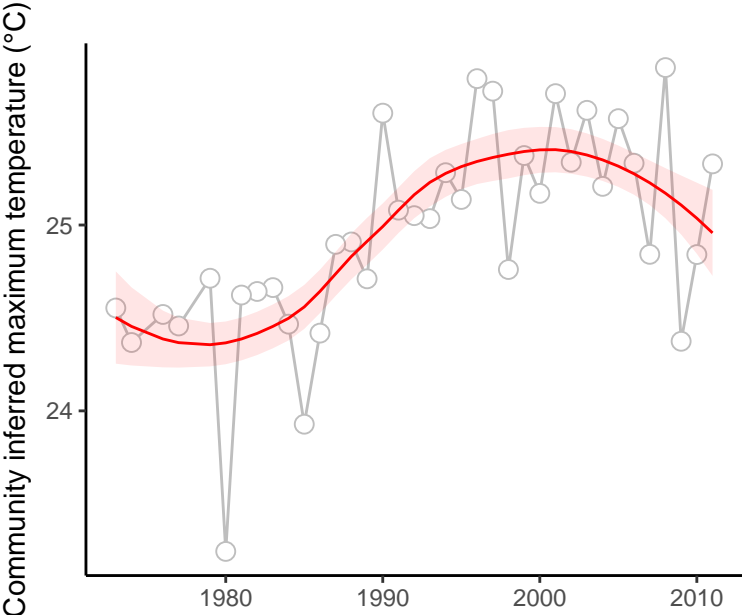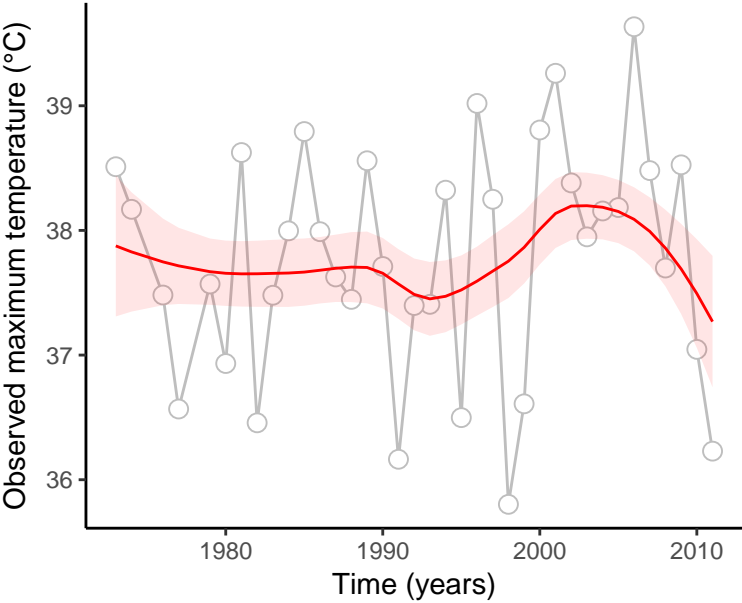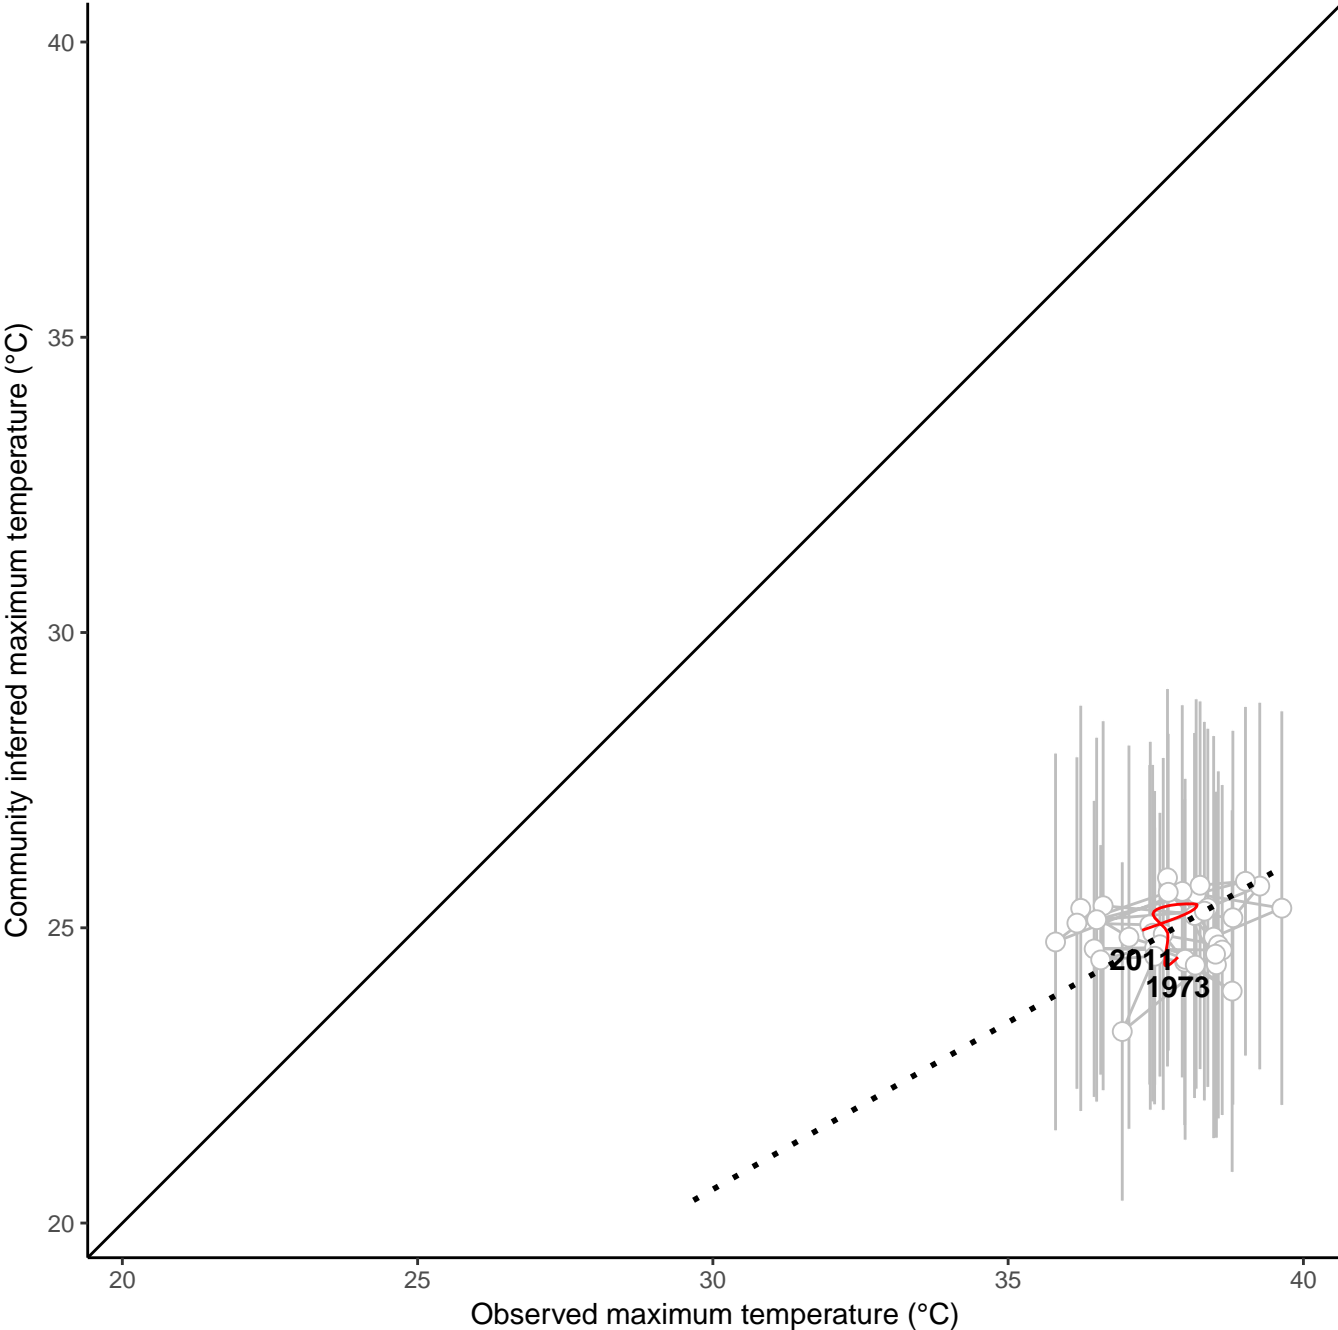

site : 840\_17\_21

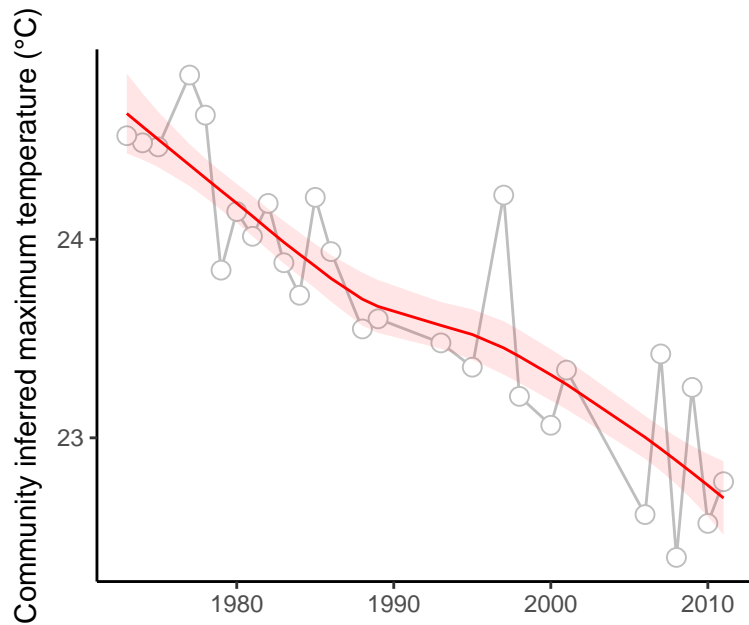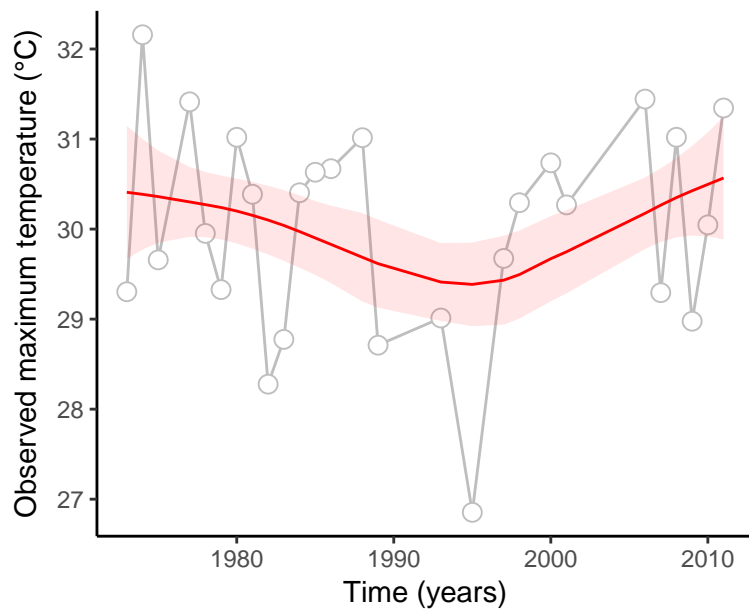

absolute deviation = 6.35 | deviation change = 2.1 | maximum state number = 2

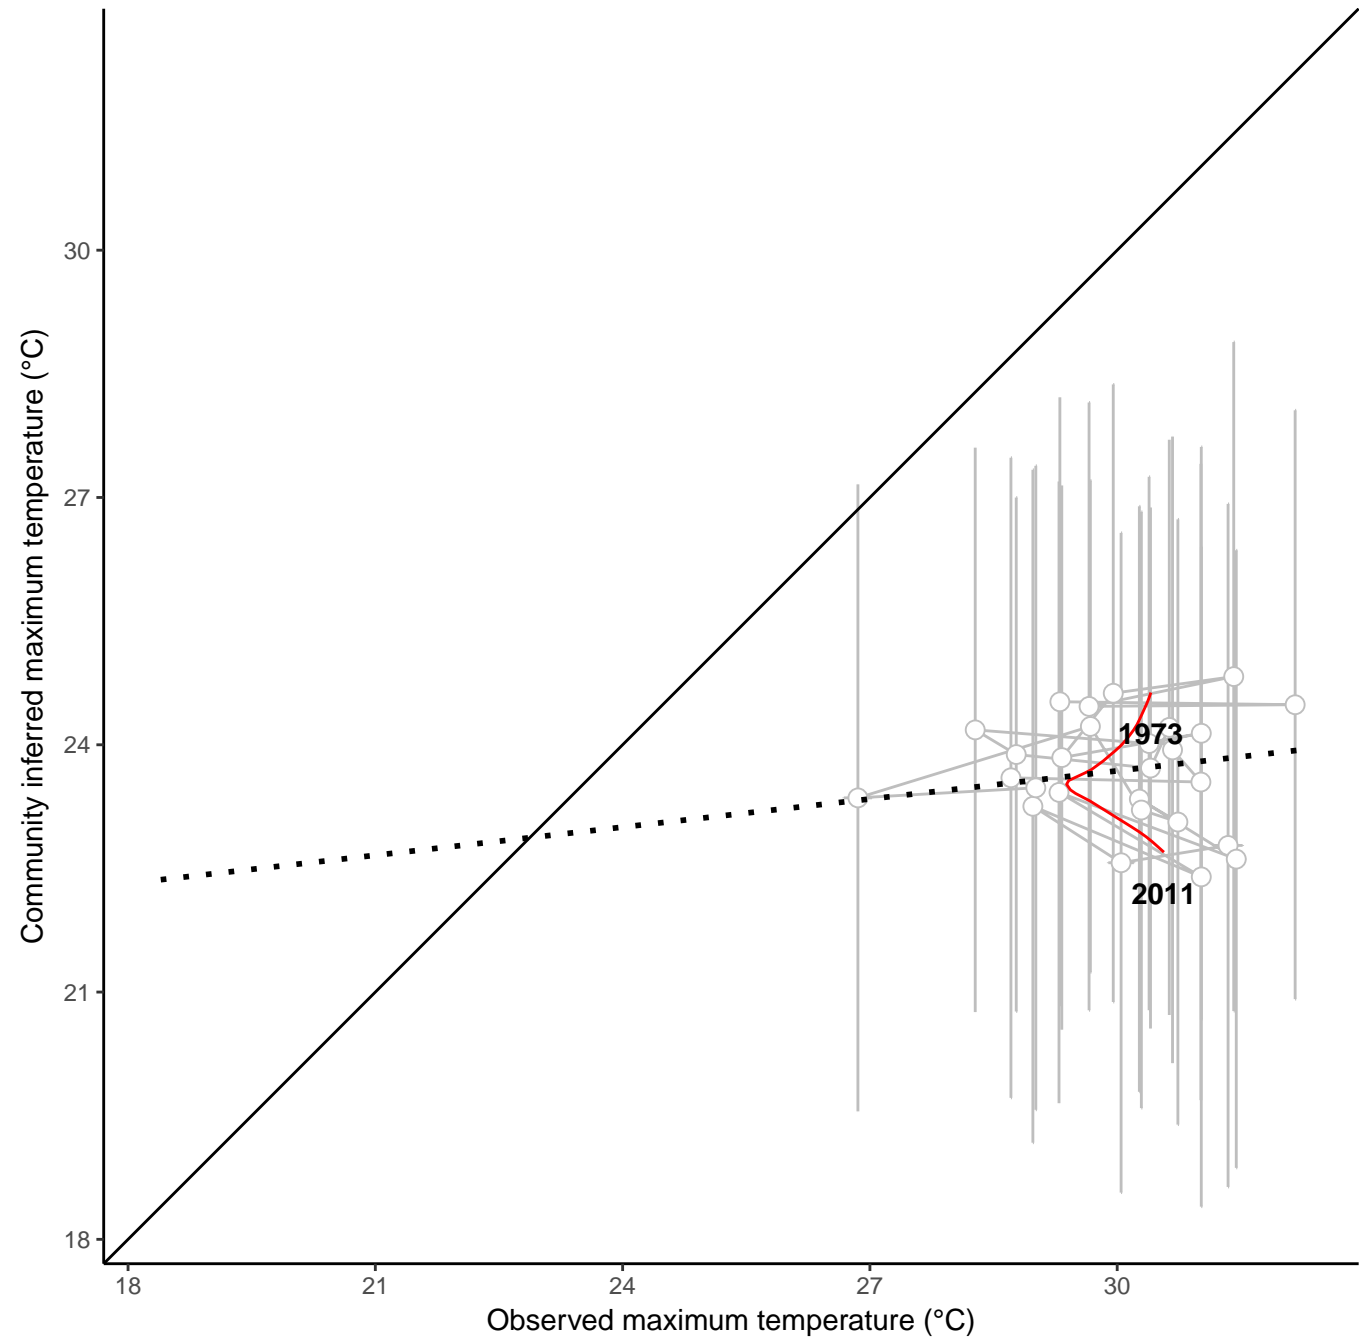

site : 840\_17\_6

absolute deviation = 3.01 | deviation change = -1.77 | maximum state number = 1

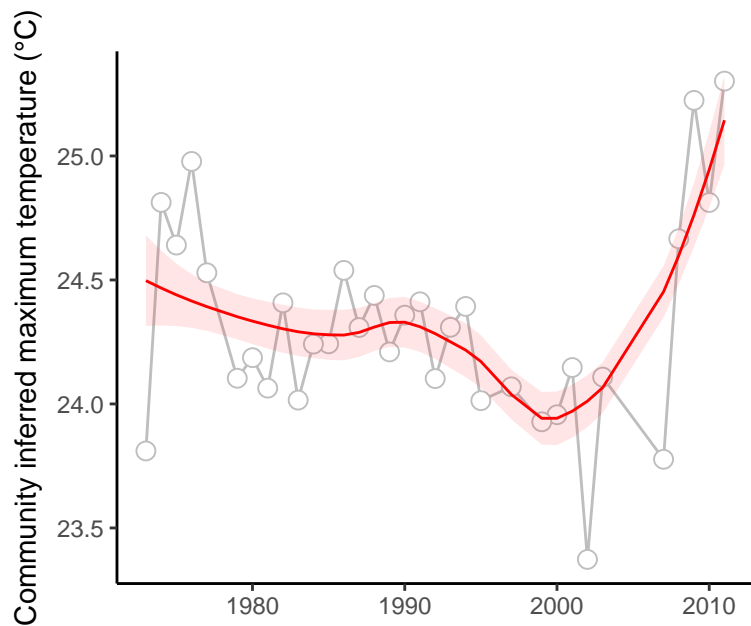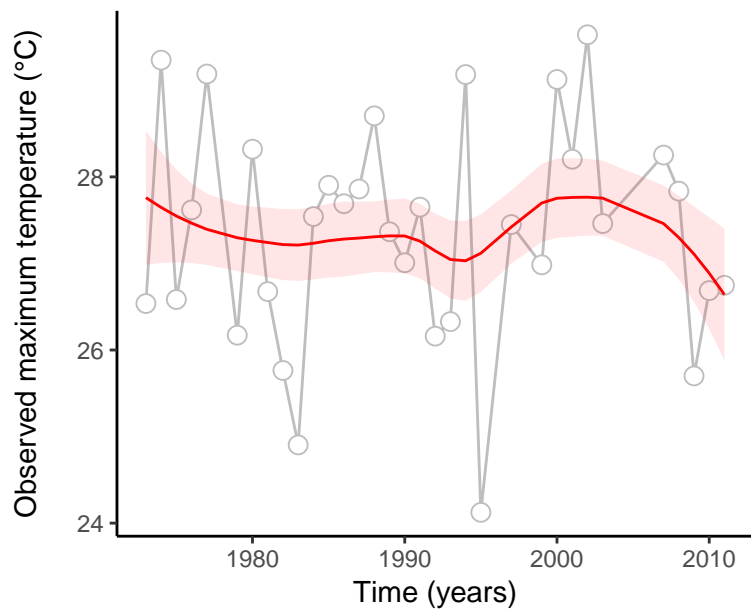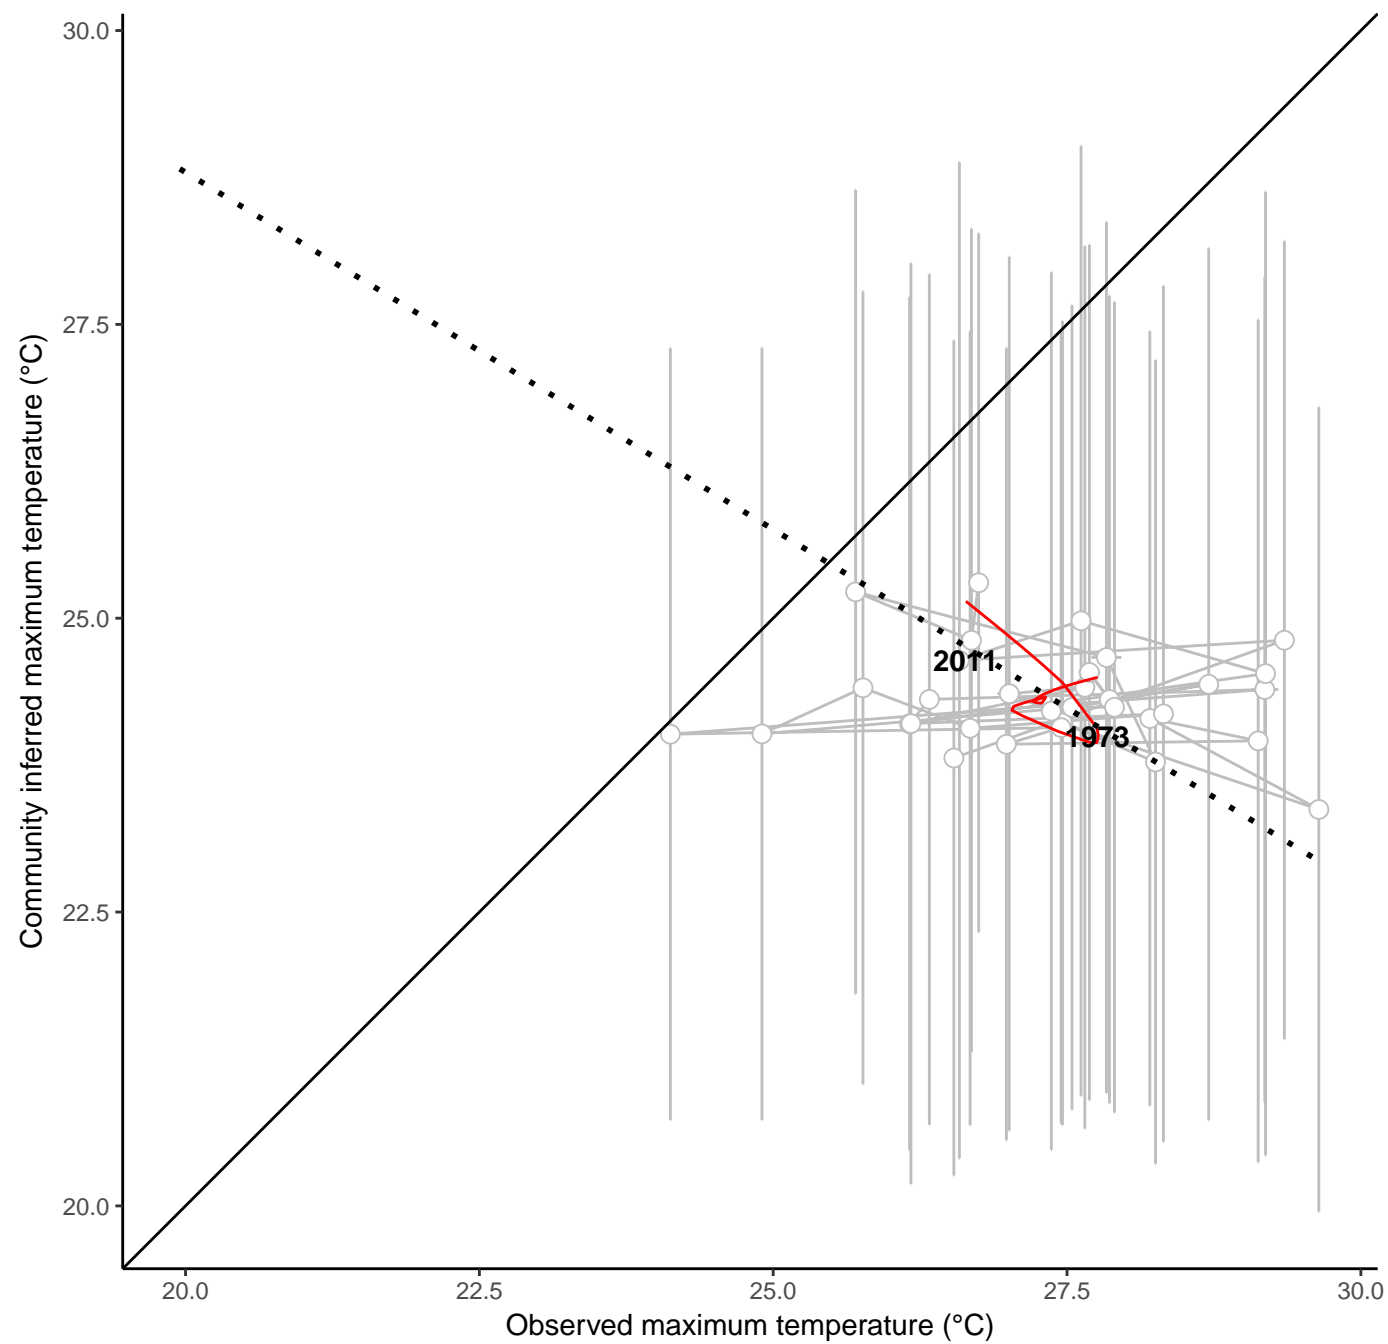



site : 840\_27\_28

absolute deviation = 5.67 | deviation change = 1.22 | maximum state number = 1

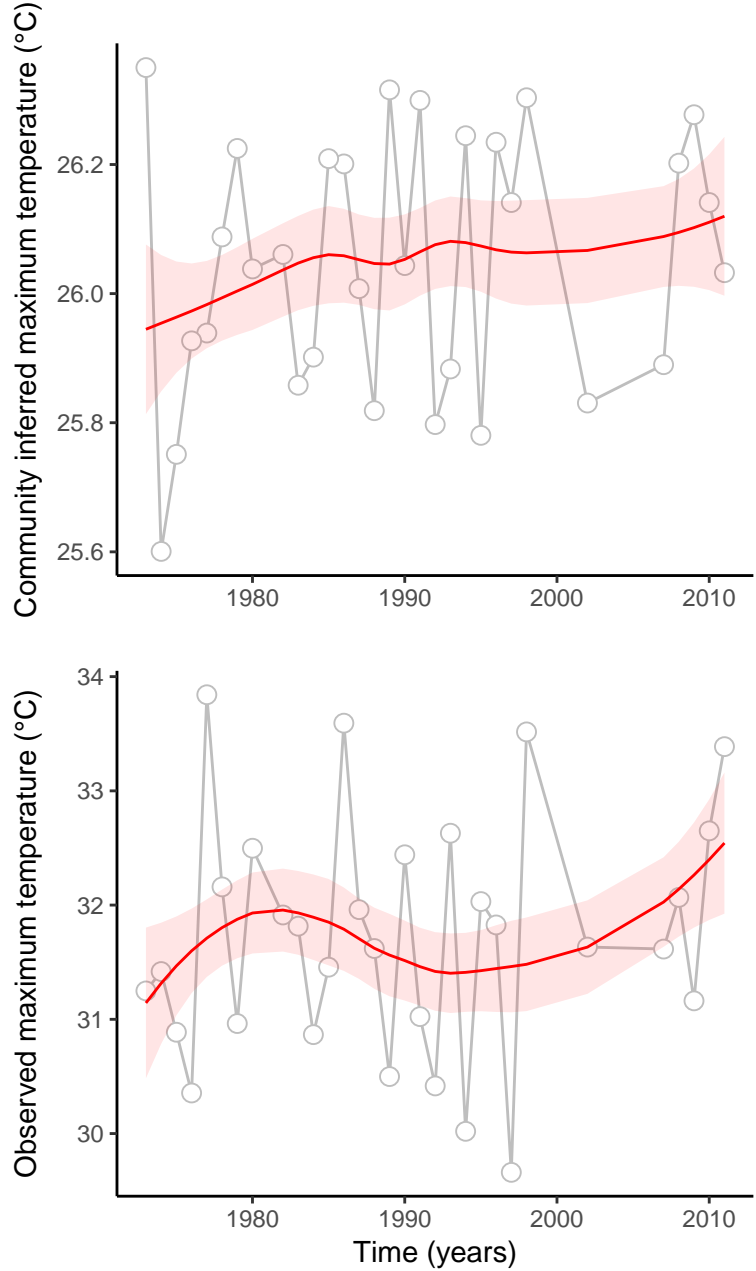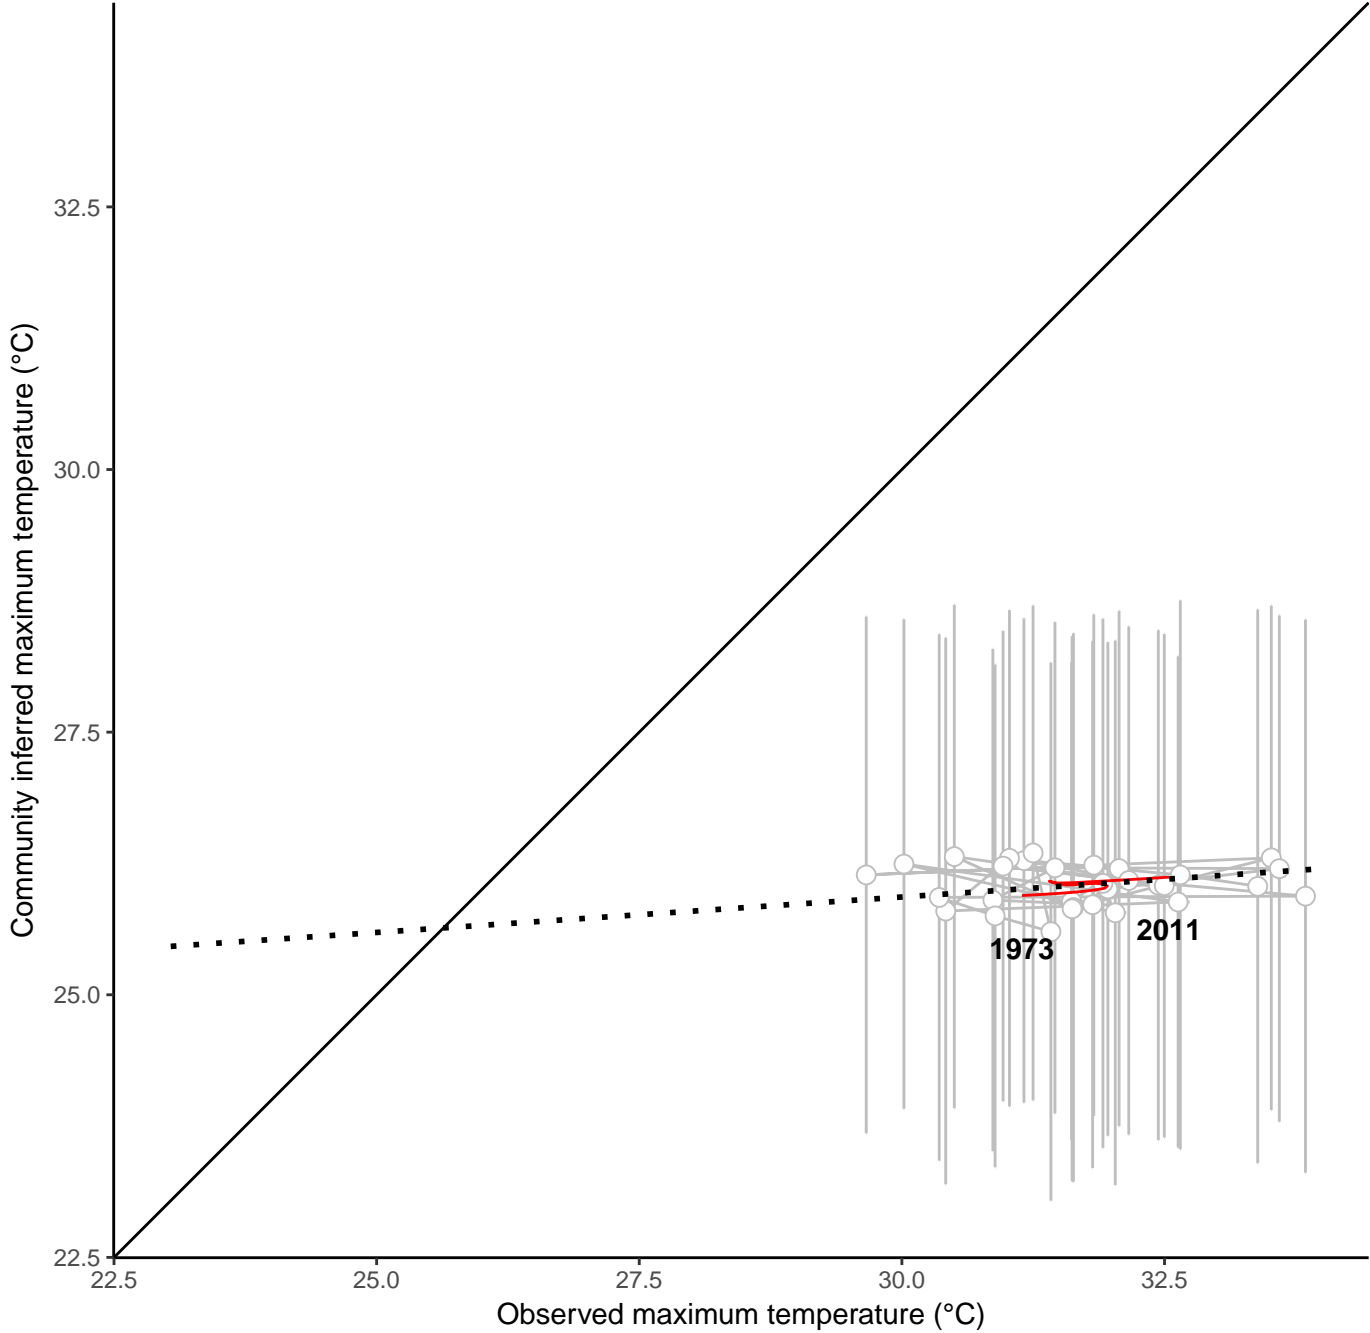

site : 840\_50\_33

absolute deviation = 0.9 | deviation change = -0.75 | maximum state number = 1

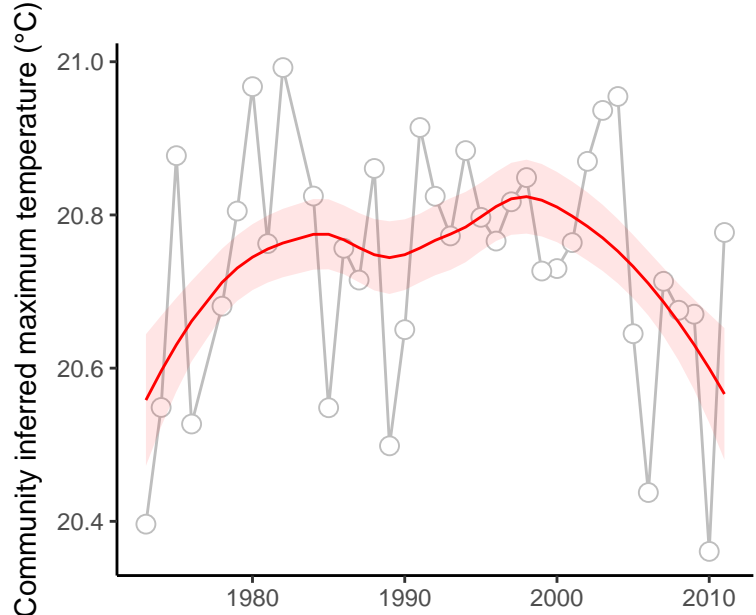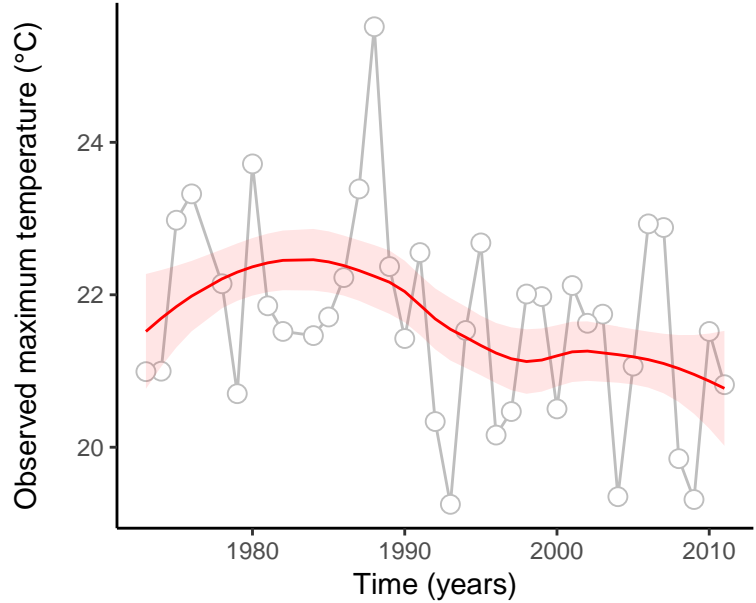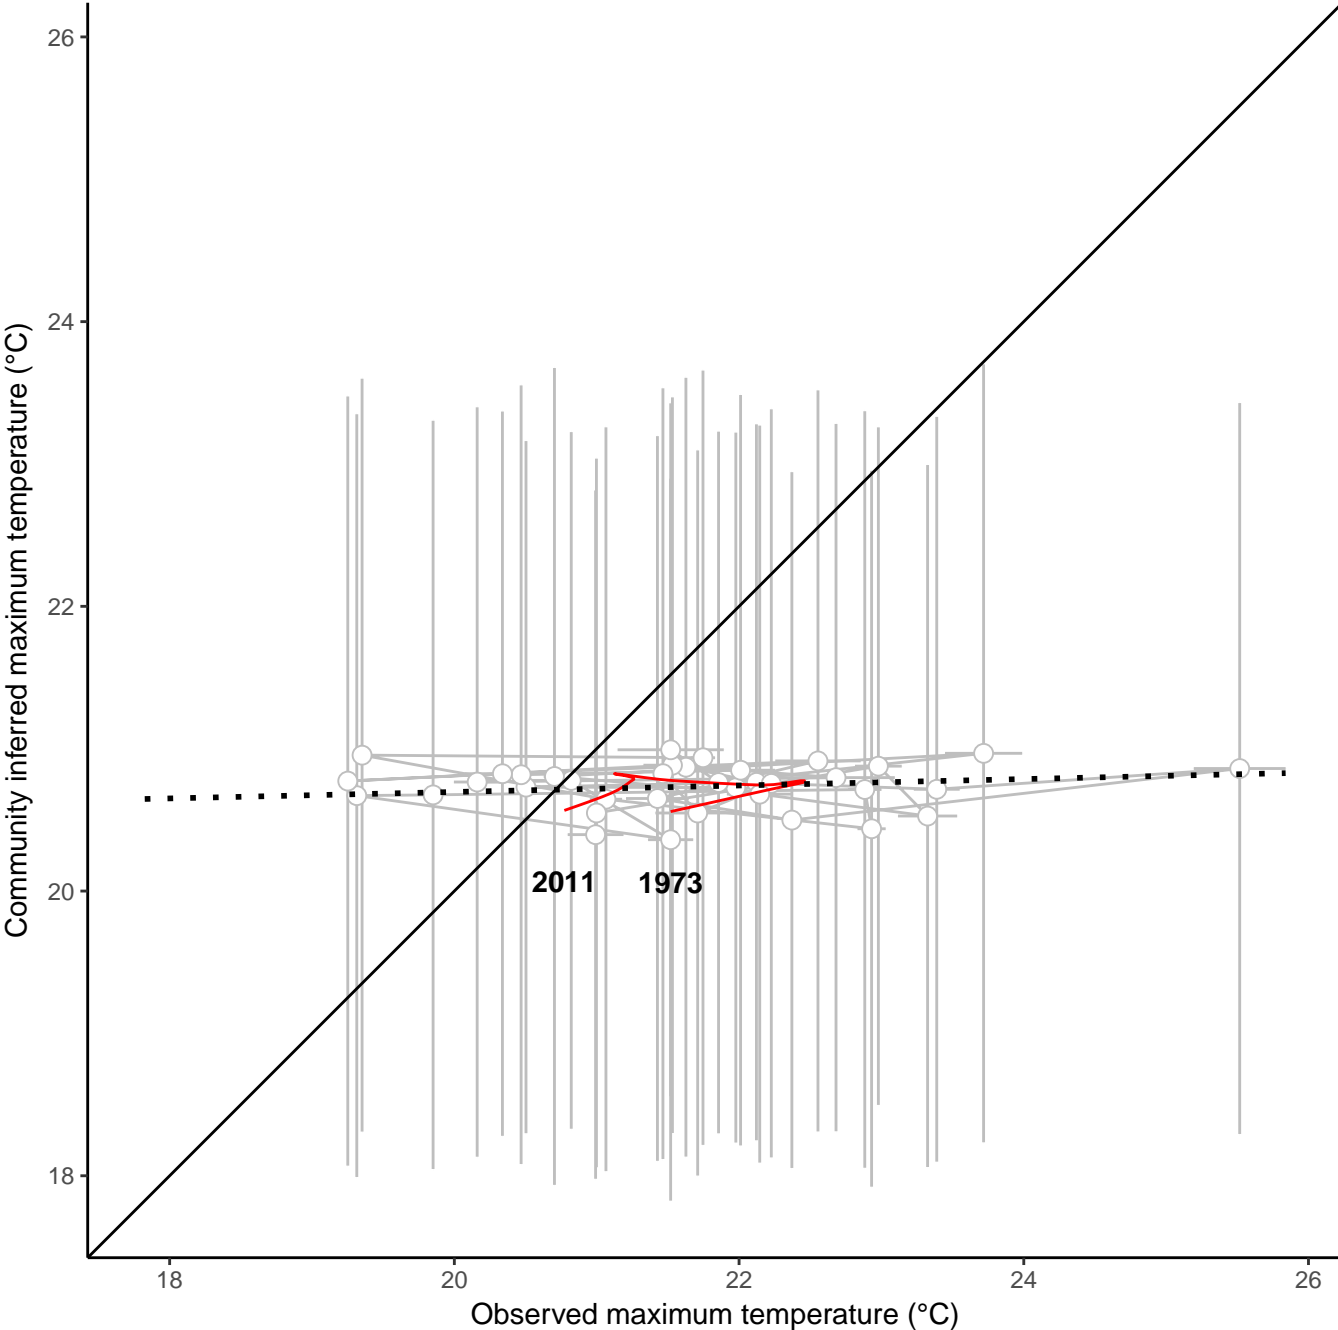

site : 840\_89\_14

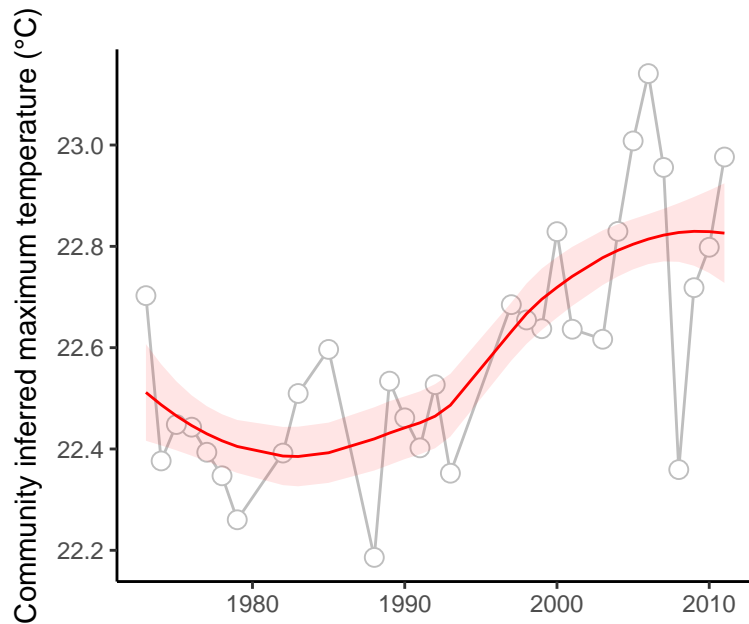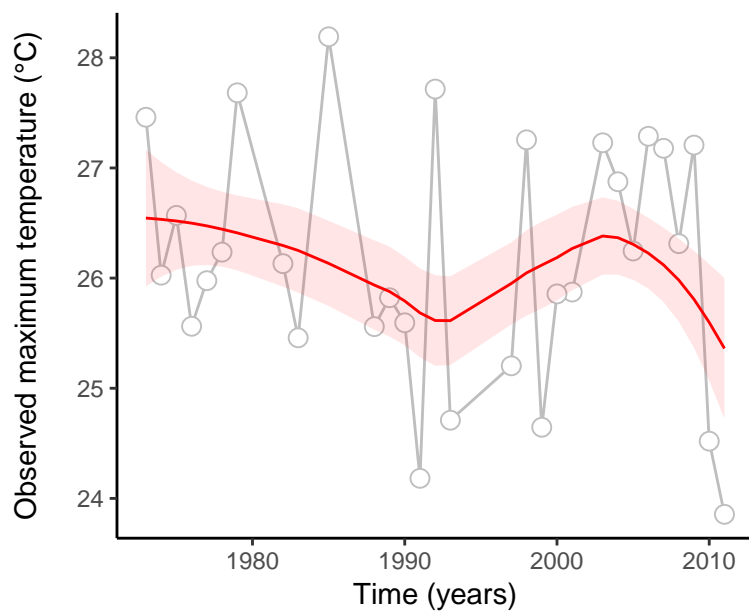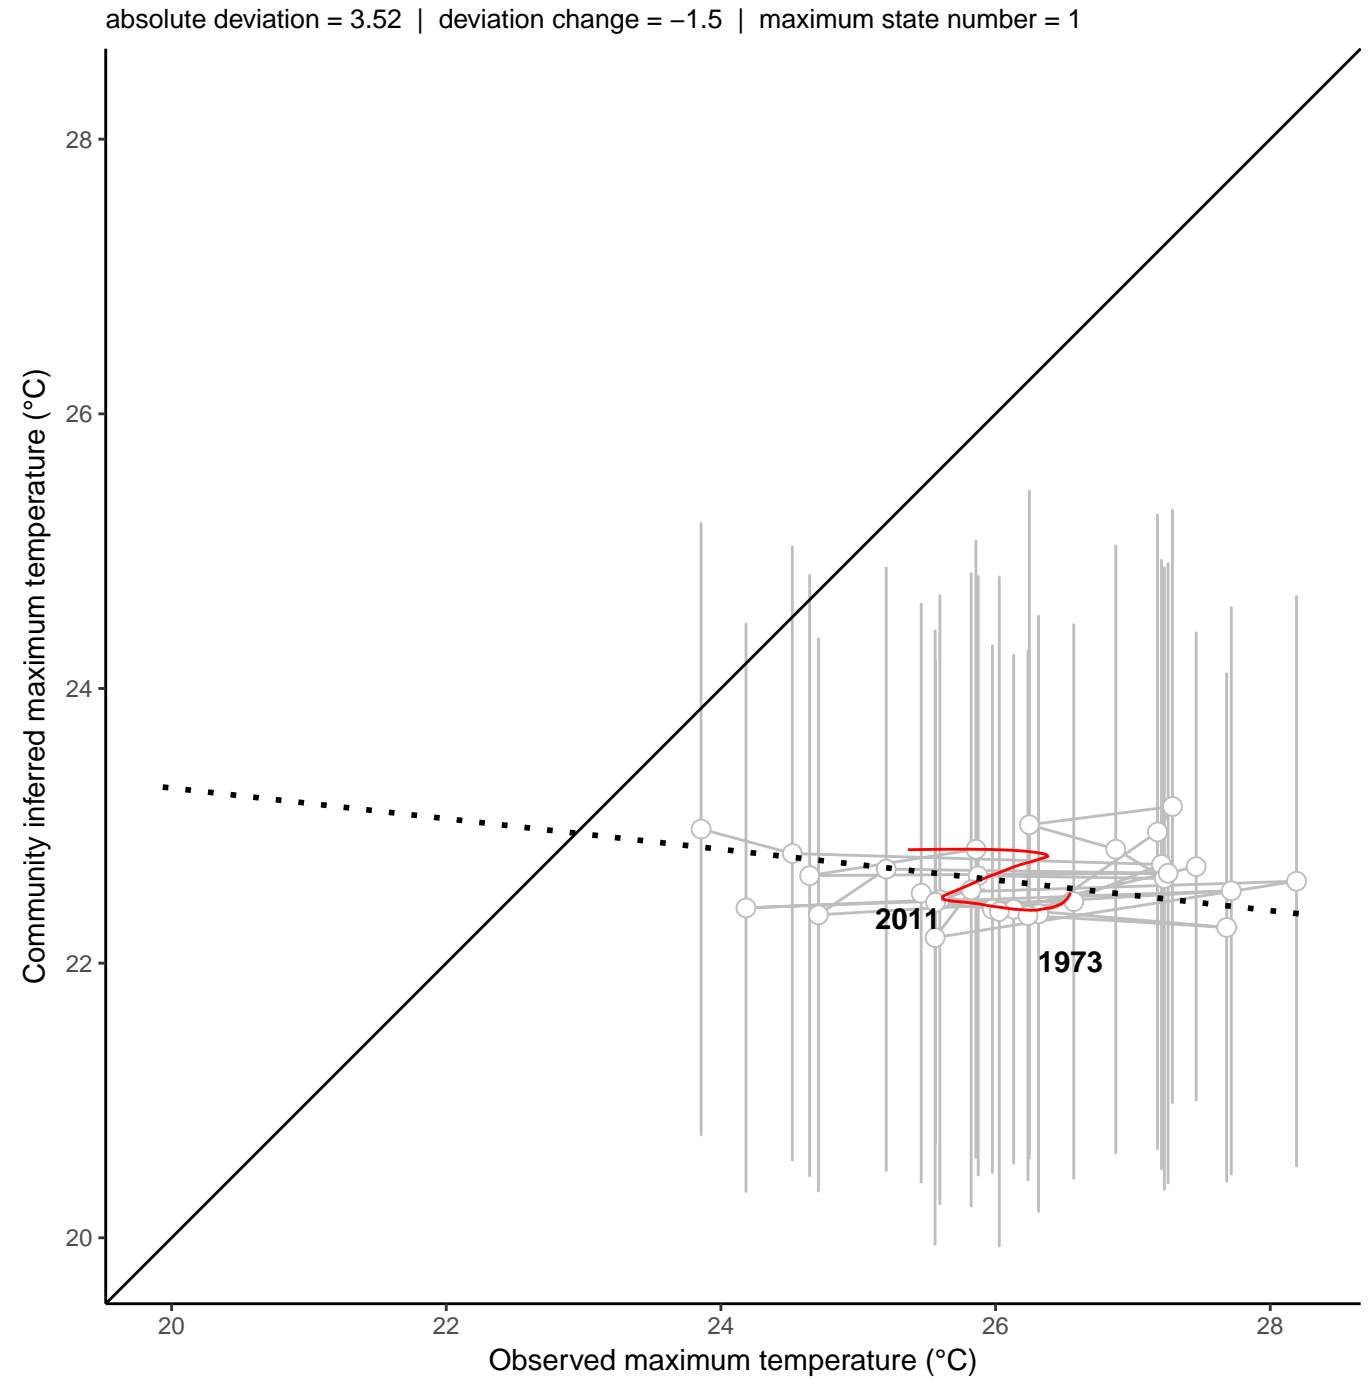

site : 840\_90\_32

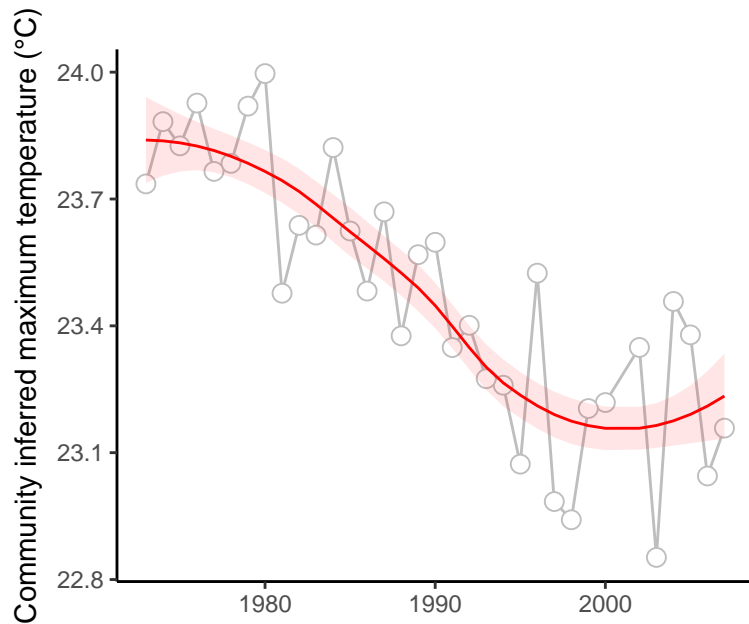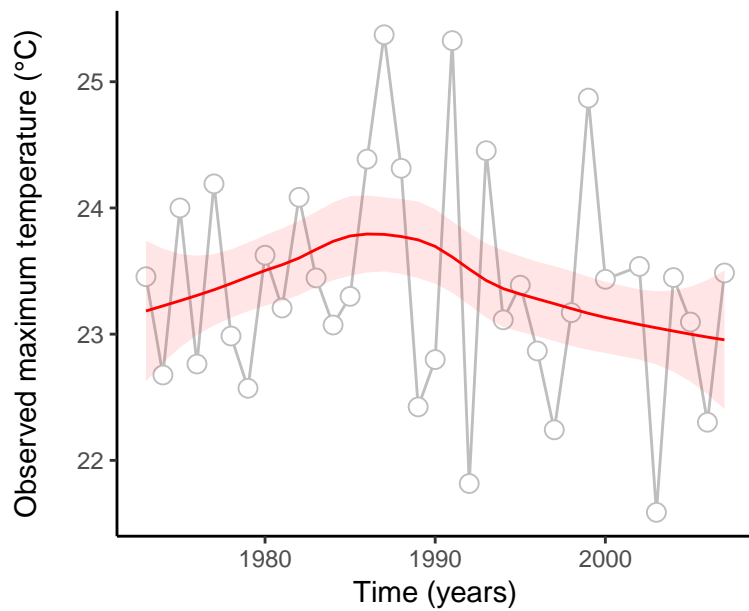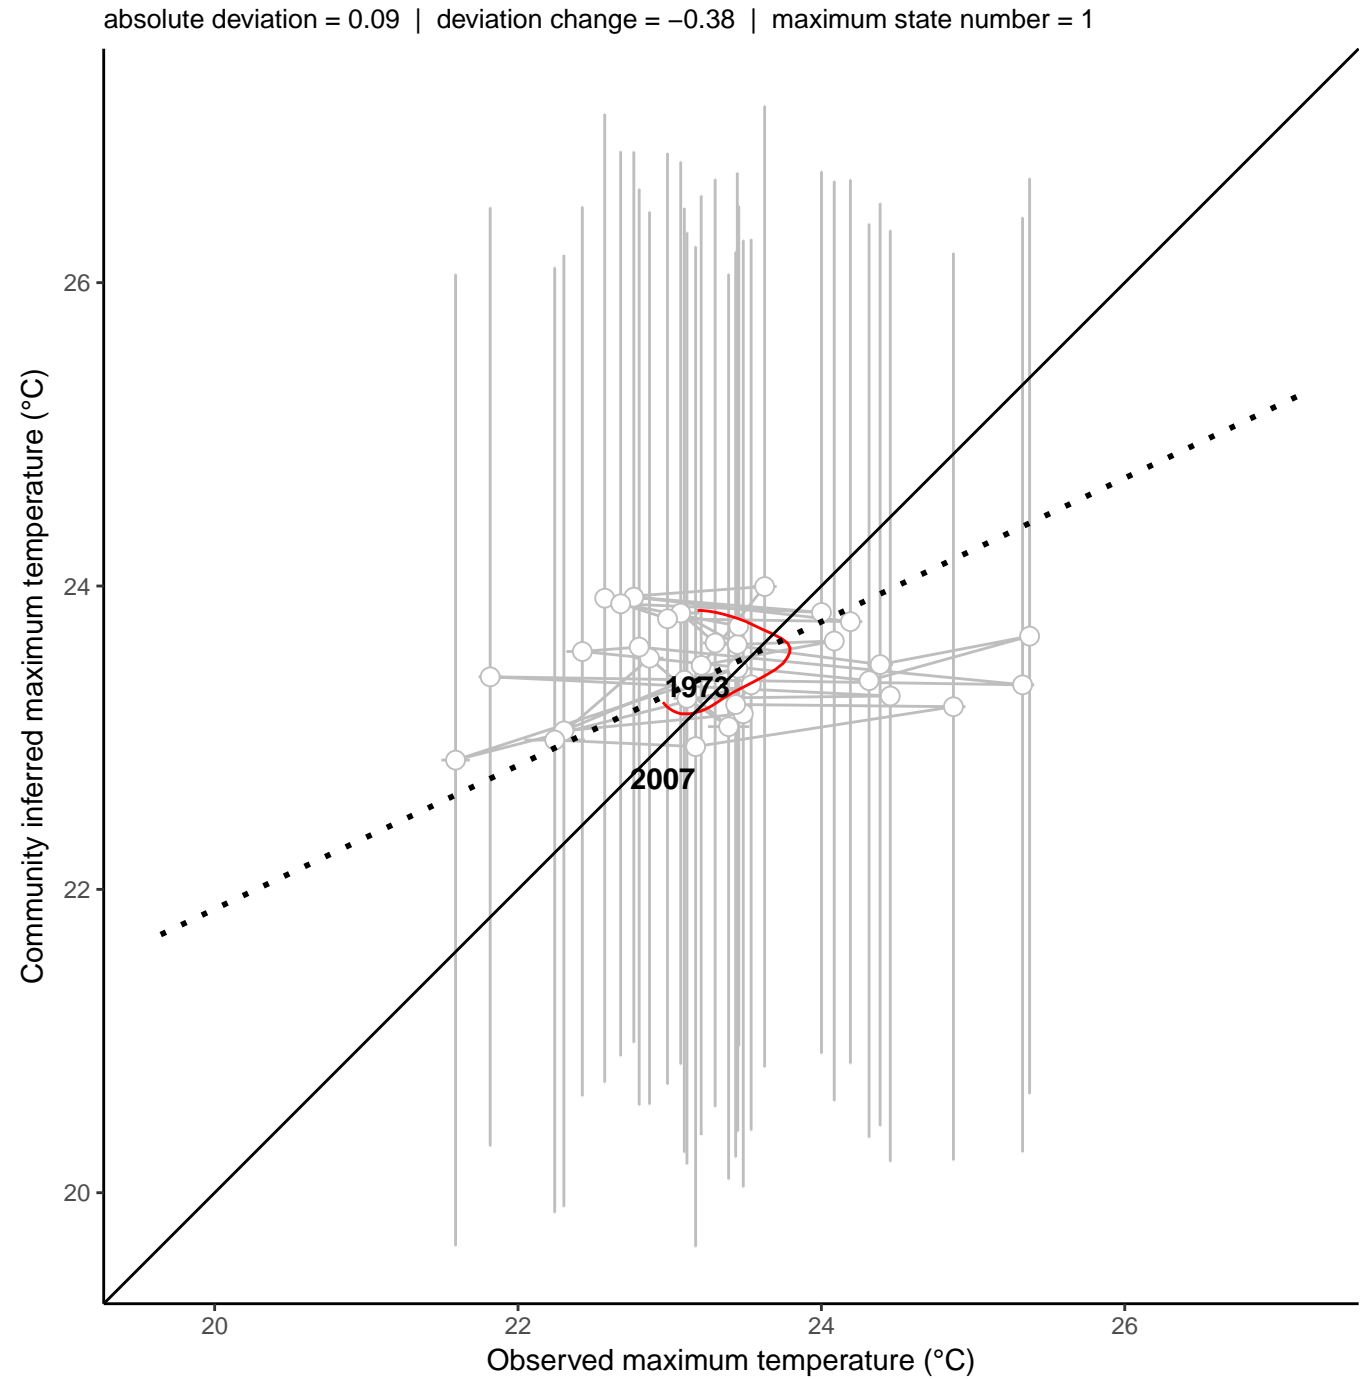

site : 840\_83\_18

absolute deviation = 6.15 | deviation change = 0.69 | maximum state number = 1

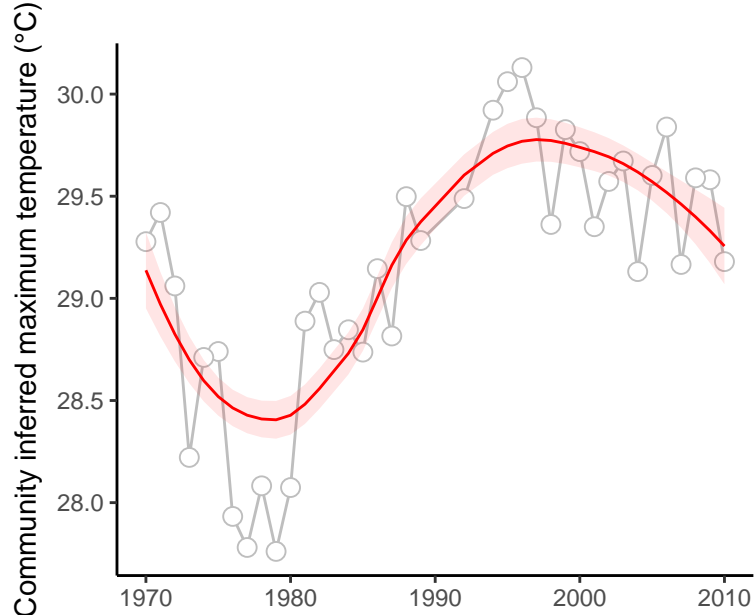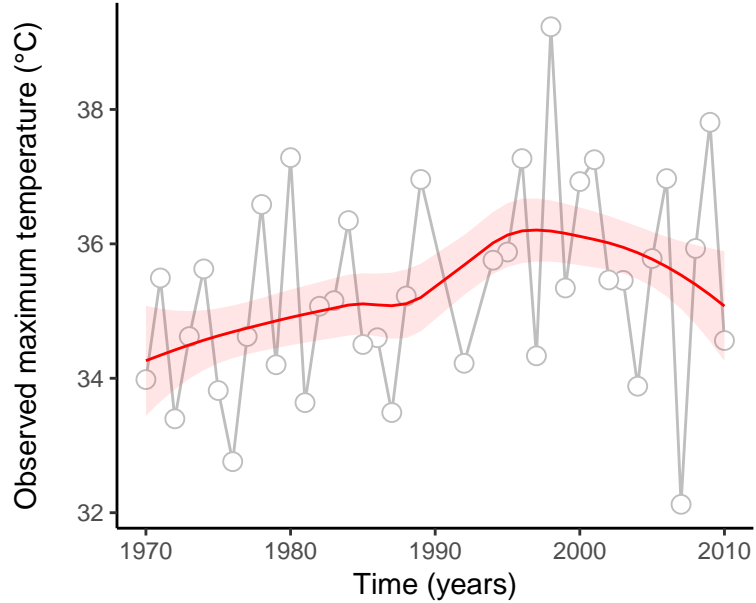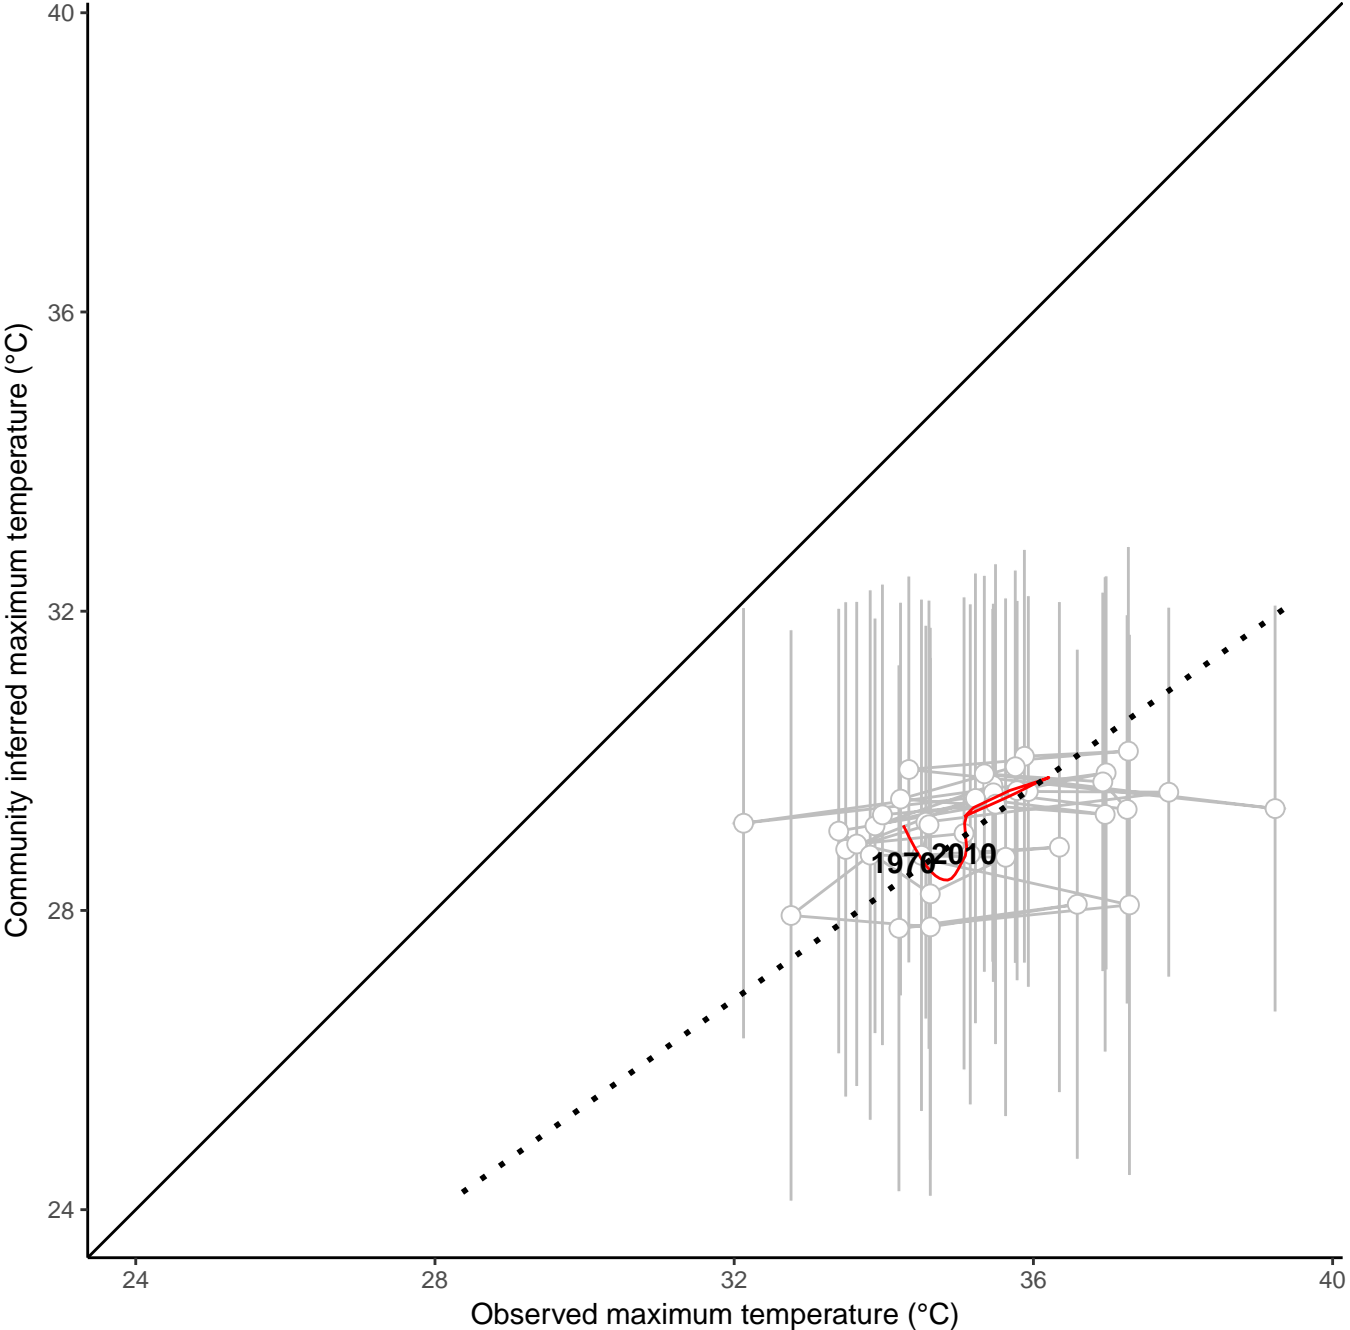

site : 840\_69\_22

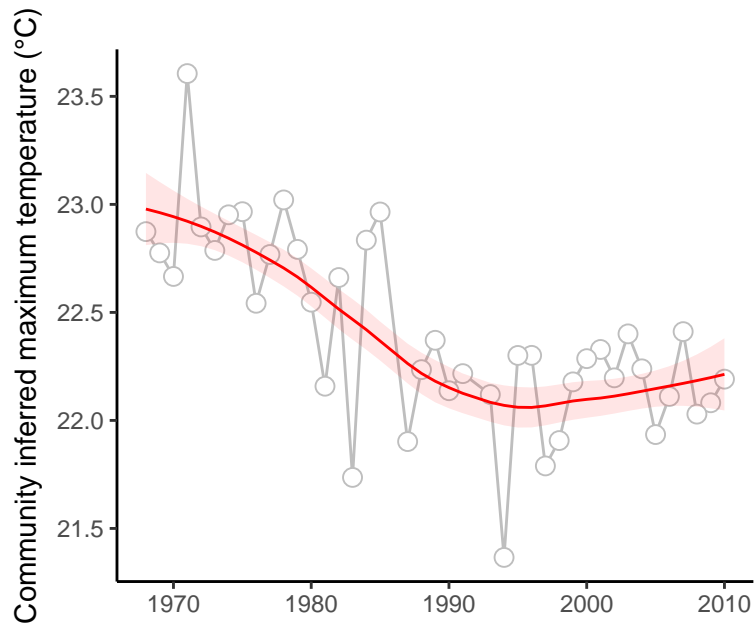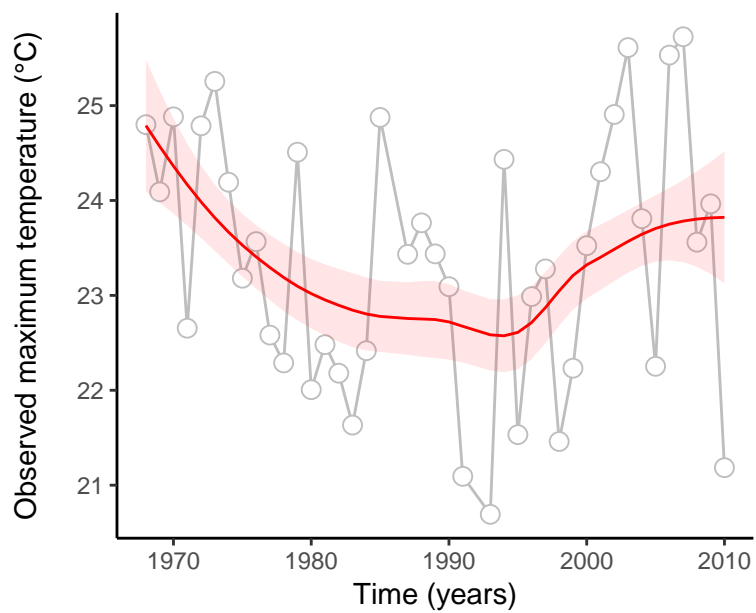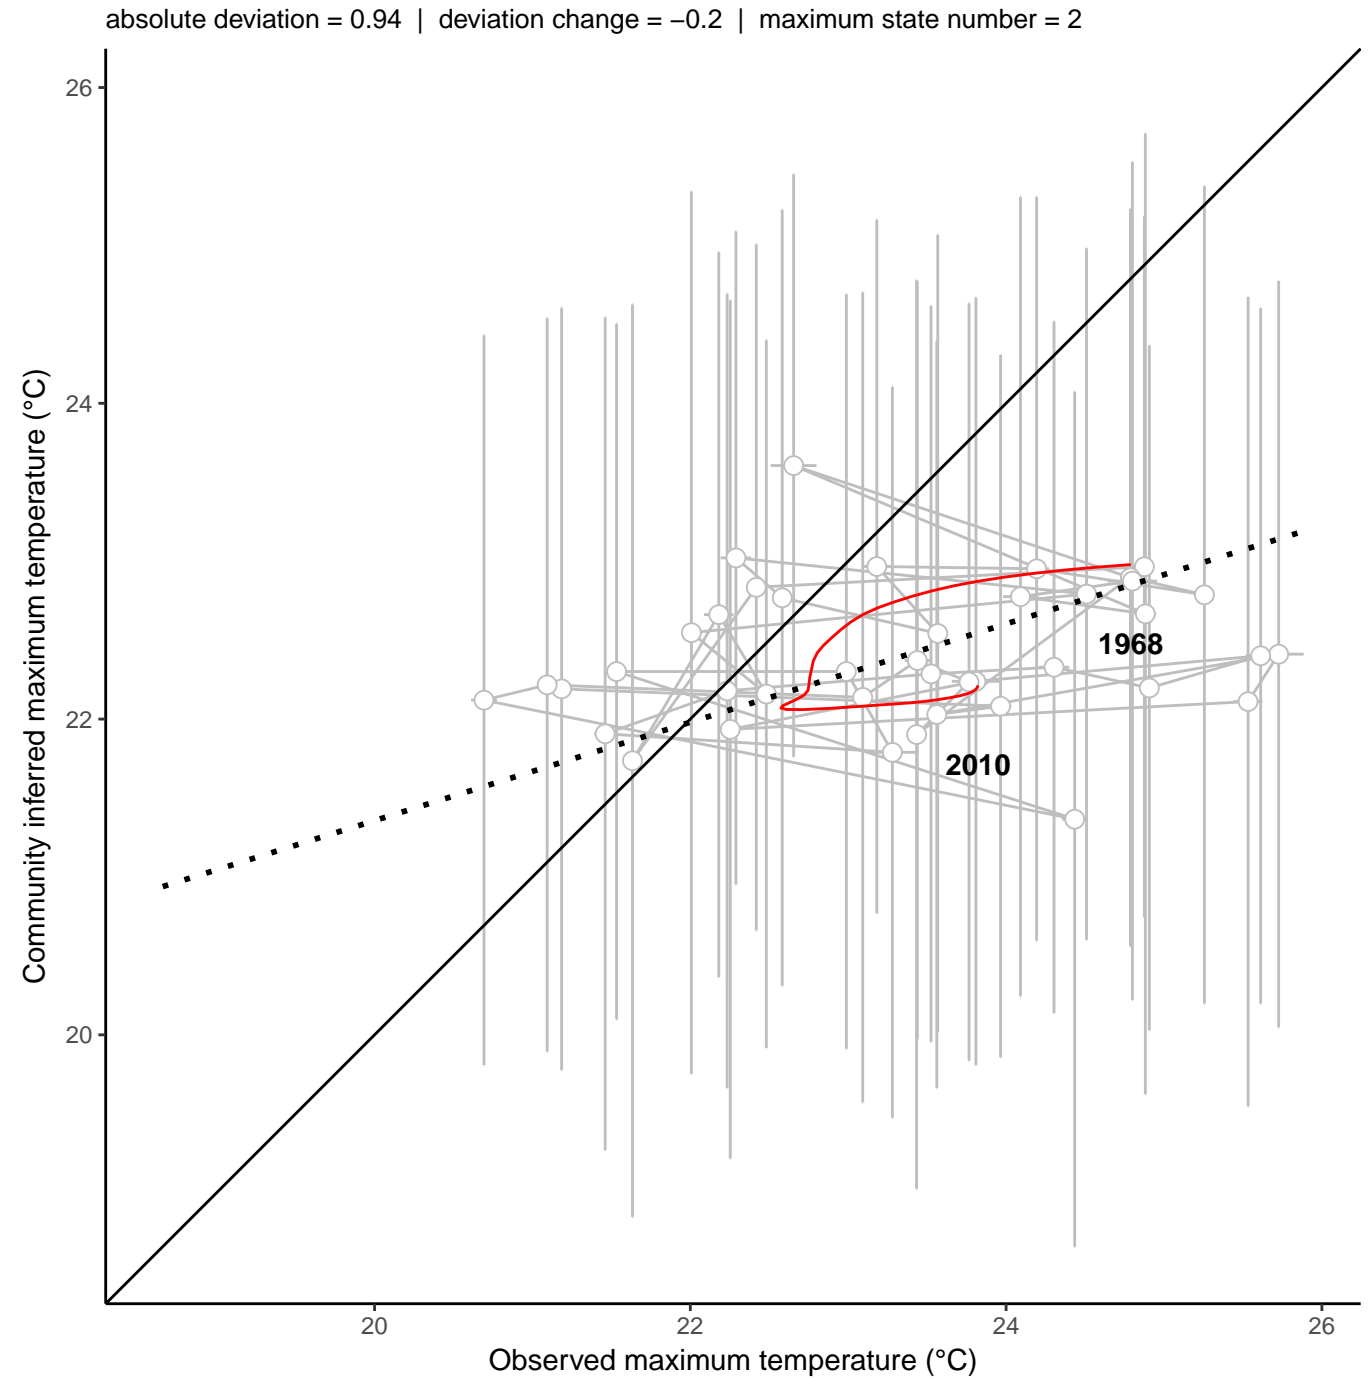

Supplement: Supplementary file 1 [file 13643444]
